# Supplementary material for: An improved zebrafish transcriptome annotation for sensitive and comprehensive detection of cell type-specific genes
Source: eLife journal article supplement (doi:10.7554/elife.55792), 2020-08-24
Supplement: data1 [file v4_2_1geneinformation.xlsx]

## Sheet: Sheet1
LLchr	LLstart	LLend	LLstrand	LLgeneID	ZFINgeneID	LLgeneAbbrev	geneName	AbbreviationSourceForTable	biotype	DrBLASTall	HsBLASTall	LLannotationNote1	LLannotationNote2	LLannotationNote3	ZFINannotationNote
chr1	6408	12027	-	LL0000023912	ZDB-GENE-020419-25	rpl24	ribosomal protein L24	ZFIN	protein_coding
chr1	11822	16373	+	LL0000005476	ZDB-GENE-031030-11	cep97	centrosomal protein 97	ZFIN	protein_coding
chr1	18648	23838	+	LL0000020271	ZDB-GENE-071024-1	nfkbiz	nuclear factor of kappa light polypeptide gene enhancer in B-cells inhibitor, zeta	ZFIN	protein_coding
chr1	25585	27255	+	LL0000008140		CU651657.1		Clone-based (Ensembl) gene	protein_coding
chr1	27690	34330	+	LL0000009391	ZDB-GENE-050417-287	eed	embryonic ectoderm development	ZFIN	protein_coding
chr1	36552	39191	+	LL0000012113	ZDB-GENE-050417-34	hikeshi	heat shock protein nuclear import factor hikeshi	ZFIN	protein_coding
chr1	39313	44565	-	LL0000030612	ZDB-GENE-030131-1928	tmem39a	transmembrane protein 39A	ZFIN	protein_coding
chr1	44839	50247	-	LL0000012690	ZDB-GENE-040426-1412	ildr1a	immunoglobulin-like domain containing receptor 1a	ZFIN	protein_coding
chr1	50828	65140	-	LL0000028365	ZDB-GENE-121214-271	si:zfos-1011f11.2	si:zfos-1011f11.2	ZFIN	protein_coding
chr1	65705	71523	-	LL0000011530	ZDB-GENE-080229-4	gpa33a	glycoprotein A33 (transmembrane), paralog a	ZFIN	protein_coding
chr1	108285	110804	-	LL0000010686		FP067451.1		Clone-based (Ensembl) gene	antisense
chr1	109798	119289	+	LL0000009921		F7 (1 of many)	zgc:163025 [Source:ZFIN;Acc:ZDB-GENE-070424-102]	HGNC symbol	protein_coding
chr1	119960	125246	+	LL0000009920	ZDB-GENE-010814-1	f7	coagulation factor VII	ZFIN	protein_coding
chr1	127250	134079	+	LL0000009922	ZDB-GENE-021206-10	f7i	coagulation factor VIIi	ZFIN	protein_coding
chr1	135903	142469	+	LL0000009904	ZDB-GENE-021206-9	f10	coagulation factor X	ZFIN	protein_coding
chr1	144284	151998	+	LL0000022654	ZDB-GENE-120816-1	prozb	protein Z, vitamin K-dependent plasma glycoprotein b	ZFIN	protein_coding
chr1	152007	157567	-	LL0000021427	ZDB-GENE-041114-79	pcid2	PCI domain containing 2	ZFIN	protein_coding
chr1	157748	168647	+	LL0000008435	ZDB-GENE-040426-1357	cul4a	cullin 4A	ZFIN	protein_coding
chr1	160302	201004	-	LL0000010461		FO681286.1		Clone-based (Ensembl) gene	protein_coding
chr1	171765	183800	+	LL0000013517	ZDB-GENE-030131-3708	lamp1a	lysosomal associated membrane protein 1a	ZFIN	protein_coding
chr1	184908	192033	-	LL0000011782	ZDB-GENE-040426-2733	grtp1a	growth hormone regulated TBC protein 1a	ZFIN	protein_coding
chr1	197236	206299	-	LL0000000405	ZDB-GENE-041010-126	adprhl1	ADP-ribosylhydrolase like 1	ZFIN	protein_coding
chr1	208177	214921	-	LL0000008743	ZDB-GENE-040625-171	dcun1d2b	DCN1, defective in cullin neddylation 1, domain containing 2b	ZFIN	protein_coding
chr1	214860	226001	+	LL0000030423	ZDB-GENE-071030-1	tmco3	transmembrane and coiled-coil domains 3	ZFIN	protein_coding
chr1	227222	243798	+	LL0000030206	ZDB-GENE-040426-1746	tfdp1b	transcription factor Dp-1, b	ZFIN	protein_coding
chr1	245076	258138	+	LL0000011750	ZDB-GENE-050823-1	grk1a	G protein-coupled receptor kinase 1 a	ZFIN	protein_coding
chr1	259991	296057	+	LL0000005428	ZDB-GENE-060929-860	cenpe	centromere protein E	ZFIN	protein_coding
chr1	296919	309348	+	LL0000030592		tmem255b	transmembrane protein 255B	GCF_000002035.6_GRCz11
chr1	309401	312613	+	LL0000016789		LOC108187164	uncharacterized LOC108187164,non-coding	GCF_000002035.6_GRCz11	lincRNA
chr1	312772	338445	-	LL0000011155	ZDB-GENE-030131-7773	gas6	growth arrest-specific 6	ZFIN	protein_coding
chr1	343229	354253	-	LL0000022646	ZDB-GENE-061013-657	pros1	protein S	ZFIN	protein_coding
chr1	355736	411366	-	LL0000023211	ZDB-GENE-090313-21	rasa3	RAS p21 protein activator 3	ZFIN	protein_coding
chr1	418866	443759	+	LL0000030884	ZDB-GENE-121214-290	tpp2	tripeptidyl peptidase 2	ZFIN	protein_coding
chr1	443174	462291	-	LL0000026359	ZDB-GENE-121214-178	si:ch73-244f7.3	si:ch73-244f7.3	ZFIN	protein_coding
chr1	466780	471925	-	LL0000039285	ZDB-GENE-040718-53	zgc:92518	zgc:92518	ZFIN	protein_coding
chr1	474073	494309	-	LL0000009767	ZDB-GENE-050327-28	ercc5	excision repair cross-complementation group 5	ZFIN	protein_coding
chr1	494297	505620	+	LL0000001933	ZDB-GENE-010724-1	blzf1	basic leucine zipper nuclear factor 1	ZFIN	protein_coding
chr1	508885	513786	-	LL0000031150	ZDB-GENE-041114-12	trmt10c	tRNA methyltransferase 10C, mitochondrial RNase P subunit	ZFIN	protein_coding
chr1	513982	522317	+	LL0000031415	ZDB-GENE-051030-63	txnl4b	thioredoxin-like 4B	ZFIN	protein_coding
chr1	518853	524433	-	LL0000026546	ZDB-GENE-090313-163	si:ch73-41e3.7	si:ch73-41e3.7	ZFIN	protein_coding
chr1	524388	532432	+	LL0000019535	ZDB-GENE-041122-1	mrpl16	mitochondrial ribosomal protein L16	ZFIN	protein_coding
chr1	532766	549521	+	LL0000005438		cenpq	centromere protein Q	GCF_000002035.6_GRCz11
chr1	549935	558826	+	LL0000008075		CU571081.1	C3a anaphylatoxin chemotactic receptor-like [Source:NCBI gene;Acc:101885604]	Clone-based (Ensembl) gene	protein_coding
chr1	576444	576521	+	LL0000019126	ZDB-MIRNAG-090929-166	mir155	microRNA 155	ZFIN	miRNA
chr1	580642	591334	+	LL0000019556	ZDB-GENE-030131-6520	mrpl39	mitochondrial ribosomal protein L39	ZFIN	protein_coding
chr1	594511	608308	+	LL0000013015	ZDB-GENE-031204-3	jam2a	junctional adhesion molecule 2a	ZFIN	protein_coding
chr1	610082	614638	-	LL0000001620	ZDB-GENE-040426-2534	atp5pf	ATP synthase peripheral stalk subunit F6	ZFIN	protein_coding
chr1	617620	656851	-	LL0000001201	ZDB-GENE-000616-13	appa	amyloid beta (A4) precursor protein a	ZFIN	protein_coding
chr1	658405	669717	-	LL0000008641	ZDB-GENE-040426-2356	cyyr1	cysteine/tyrosine-rich 1	ZFIN	protein_coding
chr1	672103	684588	-	LL0000000277	ZDB-GENE-070814-1	adamts1	ADAM metallopeptidase with thrombospondin type 1 motif, 1	ZFIN	protein_coding
chr1	686860	731593	-	LL0000000289	ZDB-GENE-070814-2	adamts5	ADAM metallopeptidase with thrombospondin type 1 motif, 5 (aggrecanase-2)	ZFIN	protein_coding
chr1	733180	733336	-	LL0000032301		XLOC_000935		Cufflinks; see BLAST hits		low confidence,NP_001129452.1,zgc:194285,zgc:194285	no Blast hit
chr1	960209	1005204	-	LL0000011146	ZDB-GENE-000616-14	gart	phosphoribosylglycinamide formyltransferase	ZFIN	protein_coding
chr1	961607	970951	+	LL0000019931	ZDB-GENE-040718-206	n6amt1	N-6 adenine-specific DNA methyltransferase 1	ZFIN	protein_coding
chr1	1005938	1014803	-	LL0000032302		XLOC_000936		Cufflinks; see BLAST hits		exact match,XP_002667026.1,LOC100332351,uncharacterized LOC100332351	low confidence,NP_001310993.1,MIA3,transport and Golgi organization protein 1 homolog isoform 5
chr1	1005938	1014803	-	LL0000014140		LOC100332351	uncharacterized LOC100332351	GCF_000002035.6_GRCz11	protein_coding
chr1	1027556	1030612	-	LL0000015261		LOC101886071	uncharacterized LOC101886071,non-coding	GCF_000002035.6_GRCz11	lincRNA
chr1	1313605	1315753	-	LL0000006650		CR450787.1		Clone-based (Ensembl) gene	processed_transcript
chr1	1350111	1352997	-	LL0000008642		CZQB01066256.1		Clone-based (Ensembl) gene	lincRNA
chr1	1358604	1360511	-	LL0000032303		XLOC_000941		Cufflinks; see BLAST hits		moderate confidence,NP_001106978.1,il23r,interleukin 23 receptor	low confidence,NP_001310884.1,DYNC1LI2,cytoplasmic dynein 1 light intermediate chain 2 isoform 3
chr1	1360674	1402588	-	LL0000024101	ZDB-GENE-000605-1	runx1	RUNX family transcription factor 1	ZFIN	protein_coding
chr1	1571066	1571353	-	LL0000032304		XLOC_000943		Cufflinks; see BLAST hits		low confidence,XP_021335891.1,arhgap27,Rho GTPase activating protein 27, transcript variant X3	no Blast hit
chr1	1573043	1574082	+	LL0000032205		XLOC_000030		Cufflinks; see BLAST hits		no Blast hit	no Blast hit
chr1	1574551	1576294	+	LL0000019286	ZDB-MIRNAG-090929-286	mir459	microRNA 459	ZFIN	miRNA
chr1	1593044	1593341	-	LL0000032305		XLOC_000944		Cufflinks; see BLAST hits		low confidence,NP_001025454.1,ldlra,low density lipoprotein receptor a	no Blast hit
chr1	1599979	1614500	+	LL0000031682	ZDB-GENE-110718-3	urp2	urotensin II-related peptide	ZFIN	protein_coding
chr1	1618880	1631504	-	LL0000005803	ZDB-GENE-121214-172	clic6	chloride intracellular channel 6	ZFIN	protein_coding
chr1	1689775	1706159	+	LL0000001578	ZDB-GENE-001212-4	atp1a1a.4	ATPase Na+/K+ transporting subunit alpha 1a, tandem duplicate 4	ZFIN	protein_coding
chr1	1712140	1793371	+	LL0000001575	ZDB-GENE-001212-1	atp1a1a.1	ATPase Na+/K+ transporting subunit alpha 1a, tandem duplicate 1	ZFIN	protein_coding
chr1	1789357	1796834	+	LL0000001576	ZDB-GENE-001212-2	atp1a1a.2	ATPase Na+/K+ transporting subunit alpha 1a, tandem duplicate 2	ZFIN	protein_coding
chr1	1805294	1815660	+	LL0000001577	ZDB-GENE-001212-3	atp1a1a.3	ATPase Na+/K+ transporting subunit alpha 1a, tandem duplicate 3	ZFIN	protein_coding
chr1	1838164	1850104	+	LL0000001579	ZDB-GENE-020501-1	atp1a1a.5	ATPase Na+/K+ transporting subunit alpha 1a, tandem duplicate 5	ZFIN	protein_coding
chr1	1850167	1854174	-	LL0000032306		XLOC_000946		Cufflinks; see BLAST hits		low confidence,NP_001106978.1,il23r,interleukin 23 receptor	no Blast hit
chr1	1855782	1856469	-	LL0000032307		XLOC_000947		Cufflinks; see BLAST hits		low confidence,XP_693283.4,cers6,ceramide synthase 6	low confidence,NP_001138637.1,DOHH,deoxyhypusine hydroxylase
chr1	1858212	1928132	-	LL0000025048	ZDB-GENE-090312-148	si:ch211-132g1.3	si:ch211-132g1.3	ZFIN	protein_coding
chr1	1887409	1894104	-	LL0000016203		LOC103911757	uncharacterized LOC103911757	GCF_000002035.6_GRCz11	protein_coding
chr1	1896661	1900710	+	LL0000025050	ZDB-GENE-091204-469	si:ch211-132g1.6	si:ch211-132g1.6	ZFIN	protein_coding
chr1	1904336	1911709	+	LL0000025049	ZDB-GENE-090313-26	si:ch211-132g1.4	si:ch211-132g1.4	ZFIN	protein_coding
chr1	1915939	1925963	+	LL0000025047	ZDB-GENE-090313-24	si:ch211-132g1.1	si:ch211-132g1.1	ZFIN	protein_coding
chr1	2025085	2027100	+	LL0000028816	ZDB-GENE-090312-3	slc5a3a	solute carrier family 5 member 3a	ZFIN	protein_coding
chr1	2048047	2051599	-	LL0000021149	ZDB-GENE-060421-6734	oxgr1a.1	oxoglutarate (alpha-ketoglutarate) receptor 1a, tandem duplicate 1	ZFIN	protein_coding
chr1	2060430	2061419	-	LL0000021151	ZDB-GENE-090312-23	oxgr1a.3	oxoglutarate (alpha-ketoglutarate) receptor 1a, tandem duplicate 3	ZFIN	protein_coding
chr1	2074513	2075529	-	LL0000021150	ZDB-GENE-090312-1	oxgr1a.2	oxoglutarate (alpha-ketoglutarate) receptor 1a, tandem duplicate 2	ZFIN	protein_coding
chr1	2101512	2217861	+	LL0000018731	ZDB-GENE-030131-9582	mbnl2	muscleblind-like splicing regulator 2	ZFIN	protein_coding
chr1	2221988	2249358	+	LL0000023185	ZDB-GENE-090312-116	rap2ab	RAP2A, member of RAS oncogene family b	ZFIN	protein_coding
chr1	2260407	2299553	+	LL0000013448	ZDB-GENE-030424-2	kpnb3	karyopherin (importin) beta 3	ZFIN	protein_coding
chr1	2275605	2275742	+	LL0000023544		RF01229	small nucleolar RNA, H/ACA box 84 [Source:HGNC Symbol;Acc:HGNC:33615]		snoRNA
chr1	2301958	2444210	+	LL0000010140	ZDB-GENE-070424-163	farp1	FERM, RhoGEF (ARHGEF) and pleckstrin domain protein 1 (chondrocyte-derived)	ZFIN	protein_coding
chr1	2331575	2358758	-	LL0000025736	ZDB-GENE-091204-440	si:ch211-235f1.3	si:ch211-235f1.3	ZFIN	protein_coding
chr1	2446321	2453185	-	LL0000011287	ZDB-GENE-070424-26	ggact.3	gamma-glutamylamine cyclotransferase, tandem duplicate 3	ZFIN	protein_coding
chr1	2450140	2453174	-	LL0000011286	ZDB-GENE-040912-8	ggact.2	gamma-glutamylamine cyclotransferase, tandem duplicate 2	ZFIN	protein_coding
chr1	2454094	2457546	-	LL0000011285	ZDB-GENE-061103-94	ggact.1	gamma-glutamylamine cyclotransferase, tandem duplicate 1	ZFIN	protein_coding
chr1	2704604	2714275	-	LL0000008424		CU986306.1		Clone-based (Ensembl) gene	antisense
chr1	2712901	3036374	+	LL0000011555	ZDB-GENE-071004-15	gpc6a	glypican 6a	ZFIN	protein_coding
chr1	2925455	2927347	+	LL0000017818		LOC110439758	uncharacterized LOC110439758,non-coding	GCF_000002035.6_GRCz11	lincRNA
chr1	3038893	3042592	+	LL0000032206		XLOC_000050		Cufflinks; see BLAST hits		low confidence,NP_001025454.1,ldlra,low density lipoprotein receptor a	no Blast hit
chr1	3066969	3067365	-	LL0000032308		XLOC_000956		Cufflinks; see BLAST hits		low confidence,XP_017212271.1,htr2cl1,5-hydroxytryptamine (serotonin) receptor 2C, G protein-coupled-like 1, transcript variant X1	low confidence,XP_016880230.1,PECAM1,platelet endothelial cell adhesion molecule isoform X7
chr1	3100244	3295403	-	LL0000011552	ZDB-GENE-140106-260	gpc5a	glypican 5a	ZFIN	protein_coding
chr1	3297367	3297451	-	LL0000019327	ZDB-MIRNAG-090929-101	mir92a-1	microRNA 92a-1	ZFIN	miRNA
chr1	3297484	3297570	-	LL0000019168	ZDB-MIRNAG-080926-2	mir19b	microRNA 19b	ZFIN	miRNA
chr1	3297603	3297755	-	LL0000019183	ZDB-MIRNAG-050103-7	mir20a	microRNA 20a	ZFIN	miRNA
chr1	3297848	3297936	-	LL0000019167	ZDB-MIRNAG-050103-6	mir19a	microRNA 19a	ZFIN	miRNA
chr1	3298006	3298088	-	LL0000019147	ZDB-MIRNAG-081208-17	mir18a	microRNA 18a	ZFIN	miRNA
chr1	3298112	3298249	-	LL0000019135	ZDB-MIRNAG-050609-18	mir17a-1	microRNA 17a-1	ZFIN	miRNA
chr1	3305549	3330435	-	LL0000004705		CABZ01113467.1		Clone-based (Ensembl) gene	lincRNA
chr1	3786526	3833365	+	LL0000015782		LOC103910100	uncharacterized LOC103910100,non-coding	GCF_000002035.6_GRCz11	lincRNA
chr1	3844827	3846804	-	LL0000032309		XLOC_000965		Cufflinks; see BLAST hits		no Blast hit	no Blast hit
chr1	4101741	4154332	+	LL0000028920	ZDB-GENE-030131-2816	slitrk6	SLIT and NTRK-like family, member 6	ZFIN	protein_coding
chr1	4237208	4250283	-	LL0000010634		FP009765.1		Clone-based (Ensembl) gene	lincRNA
chr1	4545187	4550556	+	LL0000028913	ZDB-GENE-140106-139	slitrk1	SLIT and NTRK-like family, member 1	ZFIN	protein_coding
chr1	4554632	4556112	+	LL0000032207		XLOC_000055		Cufflinks; see BLAST hits		low confidence,NP_571149.1,npy,neuropeptide Y	low confidence,NP_705900.1,CPNE7,copine-7 isoform a
chr1	4598060	4680477	+	LL0000010506		FO744838.1		Clone-based (Ensembl) gene	lincRNA
chr1	4783348	4785445	-	LL0000032310		XLOC_000968		Cufflinks; see BLAST hits		low confidence,XP_021326220.1,LOC101882374,uncharacterized LOC101882374	no Blast hit
chr1	5148593	5154048	-	LL0000016206		LOC103911774	uncharacterized LOC103911774,non-coding	GCF_000002035.6_GRCz11	lincRNA
chr1	5273481	5277583	+	LL0000029324	ZDB-GENE-030131-7038	spry2	sprouty RTK signaling antagonist 2	ZFIN	protein_coding
chr1	5280572	5283253	+	LL0000032208		XLOC_000058		Cufflinks; see BLAST hits		low confidence,XP_017211226.1,LOC108183929,gastrula zinc finger protein XlCGF8.2DB-like	no Blast hit
chr1	5288386	5288658	-	LL0000032311		XLOC_000971		Cufflinks; see BLAST hits		low confidence,XP_021327558.1,trip6,thyroid hormone receptor interactor 6, transcript variant X6	low confidence,NP_060204.1,PALMD,palmdelphin
chr1	5354489	5394791	-	LL0000020090	ZDB-GENE-040426-2662	ndfip2	Nedd4 family interacting protein 2	ZFIN	protein_coding
chr1	5402476	5419215	+	LL0000031353	ZDB-GENE-040426-1646	tuba8l2	tubulin, alpha 8 like 2	ZFIN	protein_coding
chr1	5422437	5436156	+	LL0000029546	ZDB-GENE-050417-102	stk16	serine/threonine kinase 16	ZFIN	protein_coding
chr1	5437390	5504897	+	LL0000001553	ZDB-GENE-011212-4	atic	5-aminoimidazole-4-carboxamide ribonucleotide formyltransferase/IMP cyclohydrolase	ZFIN	protein_coding
chr1	5447177	5455682	-	LL0000019432	ZDB-GENE-040415-2	mnx2b	motor neuron and pancreas homeobox 2b	ZFIN	protein_coding
chr1	5504128	5543085	-	LL0000010426	ZDB-GENE-030131-6545	fn1b	fibronectin 1b	ZFIN	protein_coding
chr1	5576151	5587575	+	LL0000006163	ZDB-GENE-070619-6	cpo	carboxypeptidase O	ZFIN	protein_coding
chr1	5606460	5746056	-	LL0000020632	ZDB-GENE-040611-2	nrp2a	neuropilin 2a	ZFIN	protein_coding
chr1	5794913	6085750	-	LL0000024830		si:ch1073-345a8.1	si:ch1073-345a8.1 [Source:ZFIN;Acc:ZDB-GENE-091204-447]	ZFIN	protein_coding
chr1	6135126	6160856	+	LL0000000039	ZDB-GENE-050517-9	abcb6a	ATP-binding cassette, sub-family B (MDR/TAP), member 6a	ZFIN	protein_coding
chr1	6161930	6172328	+	LL0000005924	ZDB-GENE-030131-6808	cnppd1	cyclin Pas1/PHO80 domain containing 1	ZFIN	protein_coding
chr1	6171517	6185532	+	LL0000022576	ZDB-GENE-091204-419	prkag3a	protein kinase, AMP-activated, gamma 3a non-catalytic subunit	ZFIN	protein_coding
chr1	6189856	6216244	+	LL0000023410	ZDB-GENE-061215-128	retreg2	reticulophagy regulator family member 2	ZFIN	protein_coding
chr1	6218628	6225363	-	LL0000018803	ZDB-GENE-060929-384	mdh1b	malate dehydrogenase 1B, NAD (soluble)	ZFIN	protein_coding
chr1	6221936	6243978	+	LL0000010150	ZDB-GENE-090313-7	fastkd2	FAST kinase domains 2	ZFIN	protein_coding
chr1	6243906	6272146	+	LL0000011846	ZDB-GENE-040914-80	gtf3c3	general transcription factor IIIC, polypeptide 3	ZFIN	protein_coding
chr1	6307305	6329292	+	LL0000013884		LO018629.1	E3 UBIQUITIN LIGASE HECW2 EC_2.3.2.26 HECT C2 AND WW DOMAIN CONTAINING 2 HECT TYPE E3 UBIQUITIN TRANSFERASE HECW2 NEDD4 E3 UBIQUITIN LIGASE 2	Clone-based (Ensembl) gene	protein_coding
chr1	6343257	6369229	+	LL0000012027	ZDB-GENE-101001-3	hecw2b	HECT, C2 and WW domain containing E3 ubiquitin protein ligase 2b	ZFIN	protein_coding
chr1	6403551	6494384	-	LL0000013370	ZDB-GENE-050522-276	klf7a	Kruppel-like factor 7a	ZFIN	protein_coding
chr1	6640002	6646358	+	LL0000026171	ZDB-GENE-090312-164	si:ch211-93g23.2	si:ch211-93g23.2	ZFIN	protein_coding
chr1	6646507	6664446	+	LL0000031475	ZDB-GENE-040426-2557	ube2f	ubiquitin-conjugating enzyme E2F (putative)	ZFIN	protein_coding
chr1	6664850	6669420	+	LL0000000727		AL929396.1		Clone-based (Ensembl) gene	lincRNA
chr1	6673524	6674290	+	LL0000032209		XLOC_000069		Cufflinks; see BLAST hits		low confidence,NP_001076369.1,taar10c,trace amine-associated receptor 10c	no Blast hit
chr1	6683537	6685619	+	LL0000032210		XLOC_000070		Cufflinks; see BLAST hits		low confidence,XP_021327923.1,LOC101885714,uncharacterized LOC101885714	low confidence,NP_001356717.1,SCN8A,sodium channel protein type 8 subunit alpha isoform 4
chr1	6706751	6708800	+	LL0000032211		XLOC_000071		Cufflinks; see BLAST hits		no Blast hit	no Blast hit
chr1	6817290	6929018	+	LL0000009756	ZDB-GENE-030918-4	erbb4a	erb-b2 receptor tyrosine kinase 4a	ZFIN	protein_coding
chr1	6929127	6930243	+	LL0000032212		XLOC_000074		Cufflinks; see BLAST hits		no Blast hit	no Blast hit
chr1	6957096	7054455	-	LL0000008330		CU928069.1		Clone-based (Ensembl) gene	processed_transcript
chr1	7063837	7063943	+	LL0000008364		CU929161.1		Clone-based (Ensembl) gene	processed_transcript
chr1	7092273	7115914	+	LL0000004441		CABZ01075319.1		Clone-based (Ensembl) gene	lincRNA
chr1	7189839	7460508	+	LL0000009755		ERBB4 (1 of many)	si:ch73-383l1.1 [Source:ZFIN;Acc:ZDB-GENE-121214-64]	HGNC symbol	protein_coding
chr1	7517402	7539716	+	LL0000013526	ZDB-GENE-040924-1	lancl1	LanC antibiotic synthetase component C-like 1 (bacterial)	ZFIN	protein_coding
chr1	7538909	7554463	+	LL0000019863	ZDB-GENE-000322-6	mylz3	myosin, light polypeptide 3, skeletal muscle	ZFIN	protein_coding
chr1	7556963	7561231	+	LL0000021441	ZDB-GENE-041010-130	pcnp	PEST proteolytic signal containing nuclear protein	ZFIN	protein_coding
chr1	7562316	7570181	-	LL0000019774	ZDB-GENE-030721-5	mxa	myxovirus (influenza) resistance A	ZFIN	protein_coding
chr1	7574351	7603734	-	LL0000019775	ZDB-GENE-030721-6	mxb	myxovirus (influenza) resistance B	ZFIN	protein_coding
chr1	7631745	7660049	-	LL0000009439	ZDB-GENE-010618-1	efnb2b	ephrin-B2b	ZFIN	protein_coding
chr1	7661471	7673461	-	LL0000001257	ZDB-GENE-040426-736	arglu1b	arginine and glutamate rich 1b	ZFIN	protein_coding
chr1	7679225	7683374	+	LL0000009632	ZDB-GENE-980526-6	en1b	engrailed homeobox 1b	ZFIN	protein_coding
chr1	7700023	7701837	-	LL0000003617		BX908756.1		Clone-based (Ensembl) gene	lincRNA
chr1	7771557	7844362	-	LL0000003618		BX908756.2		Clone-based (Ensembl) gene	lincRNA
chr1	7847260	7894273	-	LL0000023141	ZDB-GENE-071206-1	radil	Ras association and DIL domains	ZFIN	protein_coding
chr1	7900665	7905612	-	LL0000032312		XLOC_000990		Cufflinks; see BLAST hits		low confidence,XP_021333058.1,LOC101883618,uncharacterized protein PF11_0213-like	no Blast hit
chr1	7924955	8012299	-	LL0000027906	ZDB-GENE-050302-48	si:dkey-79f11.10	si:dkey-79f11.10	ZFIN	protein_coding
chr1	7935957	7940616	-	LL0000027910	ZDB-GENE-090313-339	si:dkey-79f11.9	si:dkey-79f11.9	ZFIN	protein_coding
chr1	7946171	7978531	-	LL0000027908	ZDB-GENE-090313-338	si:dkey-79f11.7	si:dkey-79f11.7	ZFIN	protein_coding
chr1	7946842	7951002	-	LL0000027909	ZDB-GENE-030131-4806	si:dkey-79f11.8	si:dkey-79f11.8	ZFIN	protein_coding
chr1	7956030	7961696	+	LL0000007129		CR855320.1	TRANSPOSON TF2 POLYPROTEIN RETROTRANSPOSABLE ELEMENT TF2.155 KDA	Clone-based (Ensembl) gene	protein_coding
chr1	7988052	7989314	+	LL0000007130		CR855320.2	UNCHARACTERIZED	Clone-based (Ensembl) gene	protein_coding
chr1	7993632	8000558	-	LL0000027907	ZDB-GENE-030131-9145	si:dkey-79f11.5	si:dkey-79f11.5	ZFIN	protein_coding
chr1	8001435	8012476	-	LL0000007131		CR855320.3	si:dkey-79f11.10 [Source:NCBI gene;Acc:100007523]	Clone-based (Ensembl) gene	protein_coding
chr1	8017069	8020589	-	LL0000028321	ZDB-GENE-090312-156	si:dkeyp-9d4.2	si:dkeyp-9d4.2	ZFIN	protein_coding
chr1	8022320	8101668	-	LL0000028322	ZDB-GENE-110914-175	si:dkeyp-9d4.3	si:dkeyp-9d4.3	ZFIN	protein_coding
chr1	8110562	8163473	+	LL0000028812		SLC5A10	si:dkeyp-9d4.5 [Source:ZFIN;Acc:ZDB-GENE-121214-88]	HGNC symbol	protein_coding
chr1	8127675	8142226	-	LL0000010112		FAM83G	si:dkeyp-9d4.4 [Source:ZFIN;Acc:ZDB-GENE-121214-254]	HGNC symbol	protein_coding
chr1	8165340	8192418	-	LL0000011691	ZDB-GENE-050913-4	grapb	GRB2 related adaptor protein b	ZFIN	protein_coding
chr1	8200733	8205228	-	LL0000016220		LOC103911848	uncharacterized LOC103911848,non-coding	GCF_000002035.6_GRCz11	lincRNA
chr1	8304862	8404338	+	LL0000004747	ZDB-GENE-090312-128	cacna1hb	calcium channel, voltage-dependent, T type, alpha 1H subunit b	ZFIN	protein_coding
chr1	8407713	8410273	+	LL0000032213		XLOC_000086		Cufflinks; see BLAST hits		moderate confidence,NP_001106978.1,il23r,interleukin 23 receptor	low confidence,NP_001243508.2,LOC388813,putative uncharacterized protein ENSP00000383407
chr1	8415983	8428761	-	LL0000029759	ZDB-GENE-070822-6	syngr3b	synaptogyrin 3b	ZFIN	protein_coding
chr1	8434513	8507743	+	LL0000019870	ZDB-GENE-090312-149	myo15ab	myosin XVAb	ZFIN	protein_coding
chr1	8507004	8510066	-	LL0000000662		AL928835.1		Clone-based (Ensembl) gene	antisense
chr1	8508550	8518235	+	LL0000000907	ZDB-GENE-061013-602	alkbh5	alkB homolog 5, RNA demethylase	ZFIN	protein_coding
chr1	8521295	8533848	+	LL0000019028	ZDB-GENE-060929-864	mief2	mitochondrial elongation factor 2	ZFIN	protein_coding
chr1	8534698	8540050	+	LL0000028971	ZDB-GENE-061122-1	smcr8b	Smith-Magenis syndrome chromosome region, candidate 8b	ZFIN	protein_coding
chr1	8538980	8553326	-	LL0000038566	ZDB-GENE-050306-1	zgc:112980	zgc:112980	ZFIN	protein_coding
chr1	8555323	8566567	-	LL0000022802	ZDB-GENE-030131-6146	ptcd1	pentatricopeptide repeat domain 1	ZFIN	protein_coding
chr1	8573575	8575127	+	LL0000017809		LOC110439701	uncharacterized LOC110439701,non-coding	GCF_000002035.6_GRCz11	lincRNA
chr1	8575307	8577274	+	LL0000000642		AL928650.2		Clone-based (Ensembl) gene	lincRNA
chr1	8579197	8587127	+	LL0000000644		AL928650.4	ATP DEPENDENT DNA HELICASE EC_3.6.4.12	Clone-based (Ensembl) gene	protein_coding
chr1	8587230	8590640	+	LL0000000643		AL928650.3	si:ch211-160d14.9 [Source:NCBI gene;Acc:103911855]	Clone-based (Ensembl) gene	lincRNA
chr1	8591763	8597015	+	LL0000025218	ZDB-GENE-141216-220	si:ch211-160d14.15	si:ch211-160d14.15	ZFIN	protein_coding
chr1	8601862	8612394	+	LL0000028659		SLC29A4 (1 of many)	si:ch211-160d14.6 [Source:ZFIN;Acc:ZDB-GENE-121214-93]	HGNC symbol	protein_coding
chr1	8612572	8613918	-	LL0000038709	ZDB-GENE-060929-792	zgc:153118	zgc:153118	ZFIN	protein_coding
chr1	8615535	8625266	-	LL0000000641		AL928650.1	endonuclease domain-containing 1 protein-like [Source:NCBI gene;Acc:101883376]	Clone-based (Ensembl) gene	lincRNA
chr1	8626996	8629020	-	LL0000016225		LOC103911895	endonuclease domain-containing 1 protein-like	GCF_000002035.6_GRCz11	protein_coding
chr1	8638162	8646941	-	LL0000010184	ZDB-GENE-050913-65	fbxl18	F-box and leucine-rich repeat protein 18	ZFIN	protein_coding
chr1	8649099	8653385	-	LL0000000219	ZDB-GENE-000329-1	actb1	actin, beta 1	ZFIN	protein_coding
chr1	8655665	8670486	+	LL0000010885	ZDB-GENE-120507-1	fscn1b	fascin actin-bundling protein 1b	ZFIN	protein_coding
chr1	8673061	8691969	-	LL0000000071	ZDB-GENE-050517-36	abcg2b	ATP-binding cassette, sub-family G (WHITE), member 2b	ZFIN	protein_coding
chr1	8694196	8702684	+	LL0000039244	ZDB-GENE-030131-1107	zgc:77849	zgc:77849	ZFIN	protein_coding
chr1	8763429	8928841	-	LL0000011734	ZDB-GENE-070424-223	grin2ab	glutamate receptor, ionotropic, N-methyl D-aspartate 2A, b	ZFIN	protein_coding
chr1	8950804	8963797	+	LL0000007577		CT573178.1	si:ch73-191k20.1 [Source:NCBI gene;Acc:103911861]	Clone-based (Ensembl) gene	antisense
chr1	8961012	8966348	-	LL0000029134	ZDB-GENE-090313-141	socs1b	suppressor of cytokine signaling 1b	ZFIN	protein_coding
chr1	8968137	8977967	-	LL0000007967		CU467110.1	si:ch73-191k20.4 [Source:NCBI gene;Acc:100006891]	Clone-based (Ensembl) gene	lincRNA
chr1	8978908	8980665	-	LL0000026284	ZDB-GENE-090312-62	si:ch73-191k20.3	si:ch73-191k20.3	ZFIN	protein_coding
chr1	8983491	8989759	+	LL0000030371	ZDB-GENE-040219-6	tlr2	toll-like receptor 2	ZFIN	protein_coding
chr1	9004684	9068453	+	LL0000022586	ZDB-GENE-040426-1354	prkcba	protein kinase C, beta a	ZFIN	protein_coding
chr1	9071324	9074479	+	LL0000002143		BX004779.2		Clone-based (Ensembl) gene	protein_coding
chr1	9082417	9091935	+	LL0000004770	ZDB-GENE-090312-124	cacng3a	calcium channel, voltage-dependent, gamma subunit 3a	ZFIN	protein_coding
chr1	9095704	9096945	+	LL0000032214		XLOC_000103		Cufflinks; see BLAST hits		low confidence,XP_021324749.1,vsig10l2,V-set and immunoglobulin domain containing 10 like 2, transcript variant X1	no Blast hit
chr1	9100447	9114936	-	LL0000025143	ZDB-GENE-051214-4	si:ch211-14k19.8	si:ch211-14k19.8	ZFIN	protein_coding
chr1	9105039	9115034	-	LL0000031797	ZDB-GENE-090313-42	vap	vascular associated protein	ZFIN	protein_coding
chr1	9118100	9123465	-	LL0000020124	ZDB-GENE-040801-1	ndufab1a	NADH:ubiquinone oxidoreductase subunit AB1a	ZFIN	protein_coding
chr1	9124996	9134082	-	LL0000021228	ZDB-GENE-090313-43	palb2	partner and localizer of BRCA2	ZFIN	protein_coding
chr1	9137445	9140104	-	LL0000017819		LOC110439775	uncharacterized LOC110439775,non-coding	GCF_000002035.6_GRCz11	lincRNA
chr1	9144958	9145896	+	LL0000023217	ZDB-GENE-060818-9	rasd3	RASD family member 3	ZFIN	protein_coding
chr1	9153141	9161843	+	LL0000022136	ZDB-GENE-021115-7	plk1	polo-like kinase 1 (Drosophila)	ZFIN	protein_coding
chr1	9157310	9162637	-	LL0000002142		BX004779.1		Clone-based (Ensembl) gene	antisense
chr1	9163849	9195936	-	LL0000009790	ZDB-GENE-090312-15	ern2	endoplasmic reticulum to nucleus signaling 2	ZFIN	protein_coding
chr1	9199031	9227204	+	LL0000005680	ZDB-GENE-050522-508	chtf18	CTF18, chromosome transmission fidelity factor 18 homolog (S. cerevisiae)	ZFIN	protein_coding
chr1	9227081	9228007	-	LL0000011470	ZDB-GENE-081022-188	gng13a	guanine nucleotide binding protein (G protein), gamma 13a	ZFIN	protein_coding
chr1	9229967	9232075	-	LL0000028215	ZDB-GENE-141216-425	si:dkeyp-57d7.4	si:dkeyp-57d7.4	ZFIN	protein_coding
chr1	9232960	9233993	+	LL0000032215		XLOC_000109		Cufflinks; see BLAST hits		low confidence,NP_001116088.1,zgc:171435,zgc:171435	no Blast hit
chr1	9234928	9249958	+	LL0000038670	ZDB-GENE-060421-2552	zgc:136472	zgc:136472	ZFIN	protein_coding
chr1	9251606	9278603	-	LL0000031517	ZDB-GENE-070928-28	ubn1	ubinuclein 1	ZFIN	protein_coding
chr1	9277846	9285351	+	LL0000002584		BX323038.1		Clone-based (Ensembl) gene	antisense
chr1	9290103	9294115	+	LL0000031636	ZDB-GENE-050714-1	uncx4.1	Unc4.1 homeobox (C. elegans)	ZFIN	protein_coding
chr1	9308271	9321931	-	LL0000000847		AL954703.1		Clone-based (Ensembl) gene	lincRNA
chr1	9420821	9422280	-	LL0000014811		LOC101883884	uncharacterized LOC101883884,non-coding	GCF_000002035.6_GRCz11	lincRNA
chr1	9459760	9486214	-	LL0000019016	ZDB-GENE-030131-5803	micall2b	mical-like 2b	ZFIN	protein_coding
chr1	9496576	9527411	-	LL0000026214	ZDB-GENE-130530-749	si:ch73-12o23.1	si:ch73-12o23.1	ZFIN	protein_coding
chr1	9557166	9715564	+	LL0000009559	ZDB-GENE-080327-21	elfn1b	extracellular leucine-rich repeat and fibronectin type III domain containing 1b	ZFIN	protein_coding
chr1	9626277	9629724	-	LL0000031592	ZDB-GENE-160628-4	ugt5b5	UDP glucuronosyltransferase 5 family, polypeptide B5	ZFIN	protein_coding
chr1	9629161	9652547	-	LL0000031589	ZDB-GENE-100406-4	ugt5b2	UDP glucuronosyltransferase 5 family, polypeptide B2	ZFIN	protein_coding
chr1	9630996	9652696	-	LL0000031591	ZDB-GENE-070112-2332	ugt5b4	UDP glucuronosyltransferase 5 family, polypeptide B4	ZFIN	protein_coding
chr1	9635978	9652725	-	LL0000031590	ZDB-GENE-100406-5	ugt5b3	UDP glucuronosyltransferase 5 family, polypeptide B3	ZFIN	protein_coding
chr1	9644893	9652725	-	LL0000031588	ZDB-GENE-100406-3	ugt5b1	UDP glucuronosyltransferase 5 family, polypeptide B1	ZFIN	protein_coding
chr1	9737185	9858521	-	LL0000018516	ZDB-GENE-040426-1081	mad1l1	mitotic arrest deficient 1 like 1	ZFIN	protein_coding
chr1	9860381	9868458	+	LL0000022200	ZDB-GENE-030722-6	pmm2	phosphomannomutase 2	ZFIN	protein_coding
chr1	9873295	9885326	-	LL0000039170	ZDB-GENE-040426-1019	zgc:56409	zgc:56409	ZFIN	protein_coding
chr1	9886896	9914673	+	LL0000023600	ZDB-GENE-080220-46	rgs11	regulator of G protein signaling 11	ZFIN	protein_coding
chr1	9916376	9950811	+	LL0000030658		tmem8a	transmembrane protein 8A [Source:ZFIN;Acc:ZDB-GENE-090312-158]	ZFIN	protein_coding
chr1	9946697	9950811	+	LL0000017820		LOC110439781	uncharacterized LOC110439781	GCF_000002035.6_GRCz11	protein_coding
chr1	9954287	9966195	+	LL0000021531	ZDB-GENE-040426-705	pdia2	protein disulfide isomerase family A, member 2	ZFIN	protein_coding
chr1	9966384	9982114	+	LL0000028253	ZDB-GENE-090313-395	si:dkeyp-75b4.8	si:dkeyp-75b4.8	ZFIN	protein_coding
chr1	9972260	9977500	-	LL0000014856		LOC101884154	uncharacterized LOC101884154,non-coding	GCF_000002035.6_GRCz11	lincRNA
chr1	9977617	9980951	-	LL0000014850		LOC101884122	uncharacterized LOC101884122,non-coding	GCF_000002035.6_GRCz11	lincRNA
chr1	9979294	9980810	-	LL0000028252	ZDB-GENE-090312-58	si:dkeyp-75b4.7	si:dkeyp-75b4.7	ZFIN	protein_coding
chr1	9984255	10000135	-	LL0000028254	ZDB-GENE-090313-396	si:dkeyp-75b4.9	si:dkeyp-75b4.9	ZFIN	protein_coding
chr1	9994811	10000376	+	LL0000028251	ZDB-GENE-090313-394	si:dkeyp-75b4.10	si:dkeyp-75b4.10	ZFIN	protein_coding
chr1	10003193	10035939	+	LL0000031080	ZDB-GENE-090312-70	trim2b	tripartite motif containing 2b	ZFIN	protein_coding
chr1	10037444	10048514	-	LL0000023791	ZDB-GENE-040426-1104	rnf175	ring finger protein 175	ZFIN	protein_coding
chr1	10051763	10059496	+	LL0000010272	ZDB-GENE-030131-9261	fgb	fibrinogen beta chain	ZFIN	protein_coding
chr1	10063216	10064777	-	LL0000014345		LOC100536670	fibrinogen alpha chain-like	GCF_000002035.6_GRCz11	protein_coding
chr1	10063501	10071539	-	LL0000010271	ZDB-GENE-031010-21	fga	fibrinogen alpha chain	ZFIN	protein_coding
chr1	10074343	10114016	+	LL0000026216	ZDB-GENE-030131-9581	si:ch73-132f6.5	si:ch73-132f6.5	ZFIN	protein_coding
chr1	10110080	10119029	+	LL0000018304	ZDB-GENE-060810-31	lratb.1	lecithin retinol acyltransferase b, tandem duplicate 1	ZFIN	protein_coding
chr1	10118455	10124192	+	LL0000018305	ZDB-GENE-081022-106	lratb.2	lecithin retinol acyltransferase b, tandem duplicate 2	ZFIN	protein_coding
chr1	10127116	10137776	+	LL0000023302	ZDB-GENE-061013-298	rbm46	RNA binding motif protein 46	ZFIN	protein_coding
chr1	10221568	10240435	+	LL0000020559	ZDB-GENE-111115-4	npy2rl	neuropeptide Y receptor Y2, like	ZFIN	protein_coding
chr1	10270247	10272725	-	LL0000007104		CR854964.1		Clone-based (Ensembl) gene	processed_transcript
chr1	10297027	10304044	+	LL0000009501	ZDB-GENE-100215-2	eif3f	eukaryotic translation initiation factor 3, subunit F	ZFIN	protein_coding
chr1	10305611	10315206	+	LL0000039245	ZDB-GENE-040426-1901	zgc:77880	zgc:77880	ZFIN	protein_coding
chr1	10318027	10327986	+	LL0000021982	ZDB-GENE-121214-195	pip4p1b	phosphatidylinositol-4,5-bisphosphate 4-phosphatase 1b	ZFIN	protein_coding
chr1	10378641	10496809	+	LL0000008656	ZDB-GENE-020402-4	dachb	dachshund b	ZFIN	protein_coding
chr1	10461914	10473673	-	LL0000005927	ZDB-GENE-050411-12	cnpy3	canopy FGF signaling regulator 3	ZFIN	protein_coding
chr1	10486064	10620459	-	LL0000031186	ZDB-GENE-040812-1	trpc5a	transient receptor potential cation channel, subfamily C, member 5a	ZFIN	protein_coding
chr1	10636064	10640748	-	LL0000039071	ZDB-GENE-080204-80	zgc:174945	zgc:174945	ZFIN	protein_coding
chr1	10642322	10647484	-	LL0000027568	ZDB-GENE-060503-356	si:dkey-31e10.1	si:dkey-31e10.1	ZFIN	protein_coding
chr1	10662312	10663525	+	LL0000000807		AL953910.1		Clone-based (Ensembl) gene	lincRNA
chr1	10666517	10670695	-	LL0000027569	ZDB-GENE-121214-76	si:dkey-31e10.5	si:dkey-31e10.5	ZFIN	protein_coding
chr1	10672341	10683997	-	LL0000008319		CU915827.1		Clone-based (Ensembl) gene	transcribed_unprocessed_pseudogene
chr1	10683730	10699715	+	LL0000038482	ZDB-GENE-040912-107	zgc:103678	zgc:103678	ZFIN	protein_coding
chr1	10701124	10702214	+	LL0000032216		XLOC_000132		Cufflinks; see BLAST hits		low confidence,XP_021326442.1,LOC101887189,uncharacterized LOC101887189	no Blast hit
chr1	10720208	10740266	+	LL0000001585	ZDB-GENE-001127-4	atp1b1b	ATPase Na+/K+ transporting subunit beta 1b	ZFIN	protein_coding
chr1	10760059	10777133	-	LL0000005883	ZDB-GENE-090312-121	cnga3b	cyclic nucleotide gated channel subunit alpha 3b	ZFIN	protein_coding
chr1	10783670	10806635	-	LL0000026325	ZDB-GENE-090313-144	si:ch73-222h13.1	si:ch73-222h13.1	ZFIN	protein_coding
chr1	10808259	10821653	-	LL0000007306	ZDB-GENE-071120-6	crfb15	cytokine receptor family member B15	ZFIN	protein_coding
chr1	10824351	11075405	-	LL0000009006	ZDB-GENE-010426-1	dmd	dystrophin	ZFIN	protein_coding
chr1	11086955	11107435	-	LL0000013436	ZDB-GENE-030131-5437	knl1	kinetochore scaffold 1	ZFIN	protein_coding
chr1	11107446	11117930	+	LL0000013438	ZDB-GENE-081022-187	knstrn	kinetochore localized astrin (SPAG5) binding protein	ZFIN	protein_coding
chr1	11120991	11519934	-	LL0000024355	ZDB-GENE-090311-17	sdk1b	sidekick cell adhesion molecule 1b	ZFIN	protein_coding
chr1	11595798	11596829	-	LL0000027455	ZDB-GENE-090312-214	si:dkey-26i13.7	si:dkey-26i13.7	ZFIN	protein_coding
chr1	11605669	11609410	-	LL0000027454	ZDB-GENE-090312-165	si:dkey-26i13.6	si:dkey-26i13.6	ZFIN	protein_coding
chr1	11615273	11616295	-	LL0000027453	ZDB-GENE-090312-166	si:dkey-26i13.5	si:dkey-26i13.5	ZFIN	protein_coding
chr1	11626252	11631634	-	LL0000027452	ZDB-GENE-090312-212	si:dkey-26i13.3	si:dkey-26i13.3	ZFIN	protein_coding
chr1	11641314	11738573	+	LL0000005666	ZDB-GENE-090312-144	chst12b	carbohydrate (chondroitin 4) sulfotransferase 12b	ZFIN	protein_coding
chr1	11659861	11670396	+	LL0000003135		BX569798.1	guanine nucleotide-binding protein subunit alpha-12-like [Source:NCBI gene;Acc:797518]	Clone-based (Ensembl) gene	protein_coding
chr1	11670812	11689597	-	LL0000001994	ZDB-GENE-060421-6989	brat1	BRCA1-associated ATM activator 1	ZFIN	protein_coding
chr1	11690147	11710470	+	LL0000009496	ZDB-GENE-090312-175	eif3bb	eukaryotic translation initiation factor 3, subunit Bb	ZFIN	protein_coding
chr1	11711226	11733311	+	LL0000027456	ZDB-GENE-090312-134	si:dkey-26i13.8	si:dkey-26i13.8	ZFIN	protein_coding
chr1	11771897	11772946	-	LL0000032313		XLOC_001062		Cufflinks; see BLAST hits		low confidence,NP_001106978.1,il23r,interleukin 23 receptor	no Blast hit
chr1	11775536	11778831	-	LL0000039357	ZDB-GENE-140106-29	zmp:0000001069	zmp:0000001069	ZFIN	protein_coding
chr1	11781264	11850385	-	LL0000031344	ZDB-GENE-051120-105	ttyh3b	tweety family member 3b	ZFIN	protein_coding
chr1	11854710	11878868	-	LL0000012831	ZDB-GENE-090312-217	iqce	IQ motif containing E	ZFIN	protein_coding
chr1	11873000	11900425	+	LL0000029126	ZDB-GENE-090313-317	snx8b	sorting nexin 8b	ZFIN	protein_coding
chr1	11900146	11973455	-	LL0000011753	ZDB-GENE-060929-1198	grk4	G protein-coupled receptor kinase 4	ZFIN	protein_coding
chr1	11977407	11994742	+	LL0000031259	ZDB-GENE-041212-12	tspan5b	tetraspanin 5b	ZFIN	protein_coding
chr1	12009502	12044423	+	LL0000028576	ZDB-GENE-060825-277	slc24a2	solute carrier family 24 member 2	ZFIN	protein_coding
chr1	12046544	12048509	+	LL0000027783	ZDB-GENE-100922-27	si:dkey-58j15.11	si:dkey-58j15.11	ZFIN	protein_coding
chr1	12049229	12059553	+	LL0000024204	ZDB-GENE-060929-208	saraf	store-operated calcium entry-associated regulatory factor	ZFIN	protein_coding
chr1	12059662	12064827	-	LL0000022047	ZDB-GENE-070410-18	pla2g12a	phospholipase A2, group XIIA	ZFIN	protein_coding
chr1	12065156	12068520	-	LL0000027782	ZDB-GENE-100922-196	si:dkey-58j15.10	si:dkey-58j15.10	ZFIN	protein_coding
chr1	12068725	12097818	+	LL0000038211	ZDB-GENE-040426-1205	xpa	xeroderma pigmentosum, complementation group A	ZFIN	protein_coding
chr1	12105498	12134841	-	LL0000019742	ZDB-GENE-040419-2	mttp	microsomal triglyceride transfer protein	ZFIN	protein_coding
chr1	12135129	12138612	+	LL0000029288	ZDB-GENE-130821-1	spink4	serine peptidase inhibitor, Kazal type 4	ZFIN	protein_coding
chr1	12141325	12161345	-	LL0000001747	ZDB-GENE-050417-236	b4galt1	UDP-Gal:betaGlcNAc beta 1,4- galactosyltransferase, polypeptide 1	ZFIN	protein_coding
chr1	12163350	12193239	+	LL0000029591	ZDB-GENE-070410-116	stra6l	STRA6-like	ZFIN	protein_coding
chr1	12195700	12228117	+	LL0000030121	ZDB-GENE-040426-2103	tdrd7a	tudor domain containing 7 a	ZFIN	protein_coding
chr1	12228213	12260340	+	LL0000030670	ZDB-GENE-090312-131	tmod1	tropomodulin 1	ZFIN	protein_coding
chr1	12262980	12278581	-	LL0000006144	ZDB-GENE-040718-160	cplx2l	complexin 2, like	ZFIN	protein_coding
chr1	12295142	12334597	+	LL0000011467	ZDB-GENE-040426-1848	gne	glucosamine (UDP-N-acetyl)-2-epimerase/N-acetylmannosamine kinase	ZFIN	protein_coding
chr1	12335795	12344860	+	LL0000019976	ZDB-GENE-030131-1500	nansa	N-acetylneuraminic acid synthase a	ZFIN	protein_coding
chr1	12348213	12361930	+	LL0000005837	ZDB-GENE-040426-1986	clta	clathrin, light chain A	ZFIN	protein_coding
chr1	12364455	12397258	-	LL0000024287	ZDB-GENE-030131-3278	sclt1	sodium channel and clathrin linker 1	ZFIN	protein_coding
chr1	12394205	12400783	+	LL0000039239	ZDB-GENE-040426-1862	zgc:77739	zgc:77739	ZFIN	protein_coding
chr1	12552300	12679517	-	LL0000002951		BX511261.1		Clone-based (Ensembl) gene	lincRNA
chr1	12672817	12676287	+	LL0000008044		CU550719.2	uncharacterized LOC103911926 [Source:NCBI gene;Acc:103911926]	Clone-based (Ensembl) gene	lincRNA
chr1	12675627	12677908	-	LL0000008043		CU550719.1		Clone-based (Ensembl) gene	processed_transcript
chr1	12763417	12797552	+	LL0000021355	ZDB-GENE-020731-1	pcdh10a	protocadherin 10a	ZFIN	protein_coding
chr1	12802512	12803176	+	LL0000032217		XLOC_000160		Cufflinks; see BLAST hits		no Blast hit	no Blast hit
chr1	12848061	12853263	+	LL0000002582		BX323031.2		Clone-based (Ensembl) gene	processed_transcript
chr1	12924459	12937089	+	LL0000002581		BX323031.1		Clone-based (Ensembl) gene	lincRNA
chr1	13002978	13003067	+	LL0000007482		CT009746.1		Clone-based (Ensembl) gene	processed_transcript
chr1	13077467	13249240	-	LL0000002666		BX323837.1		Clone-based (Ensembl) gene	antisense
chr1	13087797	13089102	+	LL0000027791	ZDB-GENE-050420-254	si:dkey-5n7.2	si:dkey-5n7.2	ZFIN	protein_coding
chr1	13260809	13271569	-	LL0000021362	ZDB-GENE-000607-1	pcdh18a	protocadherin 18a	ZFIN	protein_coding
chr1	13364814	13678213	-	LL0000002161		BX004970.1		Clone-based (Ensembl) gene	lincRNA
chr1	13596298	13604379	-	LL0000010763		FP236197.1	uncharacterized LOC101886839 [Source:NCBI gene;Acc:101886839]	Clone-based (Ensembl) gene	lincRNA
chr1	13930625	13953733	+	LL0000020449	ZDB-GENE-110930-4	noctb	nocturnin b	ZFIN	protein_coding
chr1	13957218	13989643	-	LL0000009556	ZDB-GENE-031215-1	elf2b	E74-like factor 2b (ets domain transcription factor)	ZFIN	protein_coding
chr1	13997809	14015104	-	LL0000032314		XLOC_001083		Cufflinks; see BLAST hits		exact match,XP_003197682.1,mgarp,mitochondria-localized glutamic acid-rich protein, transcript variant X2	low confidence,NP_116012.2,MGARP,protein MGARP
chr1	14002117	14004033	-	LL0000032315		XLOC_001084		Cufflinks; see BLAST hits		no Blast hit	no Blast hit
chr1	14020445	14026780	+	LL0000012298	ZDB-GENE-030131-740	hpf1	histone PARylation factor 1	ZFIN	protein_coding
chr1	14029159	14160253	+	LL0000000993	ZDB-GENE-111215-3	ank2a	ankyrin 2a, neuronal	ZFIN	protein_coding
chr1	14162472	14234119	-	LL0000004841	ZDB-GENE-040718-277	camk2d2	calcium/calmodulin-dependent protein kinase (CaM kinase) II delta 2	ZFIN	protein_coding
chr1	14253118	14254166	+	LL0000008494	ZDB-GENE-081104-317	cxcl8a	chemokine (C-X-C motif) ligand 8a	ZFIN	protein_coding
chr1	14256716	14283599	-	LL0000021502	ZDB-GENE-100414-2	pde5aa	phosphodiesterase 5A, cGMP-specific, a	ZFIN	protein_coding
chr1	14310062	14339639	-	LL0000032062	ZDB-GENE-080225-11	wfs1a	Wolfram syndrome 1a (wolframin)	ZFIN	protein_coding
chr1	14337211	14337313	+	LL0000002966		BX530018.3		Clone-based (Ensembl) gene	miRNA
chr1	14343317	14367255	+	LL0000007330	ZDB-GENE-050720-1	crmp1	collapsin response mediator protein 1	ZFIN	protein_coding
chr1	14372534	14375561	+	LL0000002964		BX530018.1	D(1) dopamine receptor-like [Source:NCBI gene;Acc:567498]	Clone-based (Ensembl) gene	protein_coding
chr1	14382584	14404555	+	LL0000010362	ZDB-GENE-041010-138	fip1l1b	FIP1 like 1b (S. cerevisiae)	ZFIN	protein_coding
chr1	14397869	14426912	-	LL0000002965		BX530018.2	OCIA domain-containing protein 1-like [Source:NCBI gene;Acc:553528]	Clone-based (Ensembl) gene	protein_coding
chr1	14406098	14416435	+	LL0000005594	ZDB-GENE-040426-778	chic2	cysteine-rich hydrophobic domain 2	ZFIN	protein_coding
chr1	14432054	14454434	-	LL0000028694	ZDB-GENE-000524-1	slc34a2a	solute carrier family 34 member 2a	ZFIN	protein_coding
chr1	14454663	14464020	+	LL0000023326	ZDB-GENE-031117-1	rbpja	recombination signal binding protein for immunoglobulin kappa J region a	ZFIN	protein_coding
chr1	14466860	14488074	+	LL0000029539	ZDB-GENE-130530-765	stim2a	tromal interaction molecule 2a	ZFIN	protein_coding
chr1	14490479	14494782	+	LL0000014524		LOC101882365	uncharacterized LOC101882365	GCF_000002035.6_GRCz11	protein_coding
chr1	14497458	14507452	-	LL0000026983	ZDB-GENE-141215-40	si:dkey-194g4.1	si:dkey-194g4.1	ZFIN	protein_coding
chr1	14511438	14518343	-	LL0000007027		CR847936.7		Clone-based (Ensembl) gene	miRNA
chr1	14517197	14517708	-	LL0000017822		LOC110439785	uncharacterized LOC110439785,non-coding	GCF_000002035.6_GRCz11	lincRNA
chr1	14518957	14524540	-	LL0000013937		LOC100004978	uncharacterized LOC100004978	GCF_000002035.6_GRCz11	protein_coding
chr1	14527258	14538689	-	LL0000017008		LOC110437782	piggyBac transposable element-derived protein 4-like	GCF_000002035.6_GRCz11	protein_coding
chr1	14544029	14555625	+	LL0000014060		LOC100329816	serine/threonine-protein kinase pim-3-like	GCF_000002035.6_GRCz11	protein_coding
chr1	14555601	14575841	+	LL0000014154		LOC100332745	serine/threonine-protein kinase pim-3	GCF_000002035.6_GRCz11	protein_coding
chr1	14559977	14655827	-	LL0000007024		CR847936.10		Clone-based (Ensembl) gene	lincRNA
chr1	14562159	14562816	-	LL0000015021		LOC101884963	uncharacterized LOC101884963,non-coding	GCF_000002035.6_GRCz11	lincRNA
chr1	14575980	14592833	+	LL0000013942		LOC100005071	serine/threonine-protein kinase pim-3-like	GCF_000002035.6_GRCz11	protein_coding
chr1	14592841	14624608	+	LL0000017821		LOC110439784
chr1	14593705	14593798	-	LL0000007025		CR847936.2		Clone-based (Ensembl) gene	miRNA
chr1	14624516	14625552	+	LL0000017454		LOC110438559	serine/threonine-protein kinase pim-3-like	GCF_000002035.6_GRCz11	protein_coding
chr1	14641096	14641878	-	LL0000016791		LOC108189470	uncharacterized LOC108189470,non-coding	GCF_000002035.6_GRCz11	lincRNA
chr1	14648999	14649069	-	LL0000007026		CR847936.3		Clone-based (Ensembl) gene	miRNA
chr1	14650749	14651745	-	LL0000016790		LOC108189376	uncharacterized LOC108189376,non-coding	GCF_000002035.6_GRCz11	lincRNA
chr1	14652288	14655827	-	LL0000017455		LOC110438560	uncharacterized LOC110438560,non-coding	GCF_000002035.6_GRCz11	lincRNA
chr1	14655841	14663152	+	LL0000007023		CR847936.1	piggyBac transposable element-derived protein 4-like [Source:NCBI gene;Acc:100330143]	Clone-based (Ensembl) gene	protein_coding
chr1	14663471	14669517	-	LL0000032316		XLOC_001102		Cufflinks; see BLAST hits		high confidence,XP_017211461.1,LOC100004978,uncharacterized LOC100004978, transcript variant X2	no Blast hit
chr1	14663578	14669165	+	LL0000016784		LOC108185170	uncharacterized LOC108185170	GCF_000002035.6_GRCz11	protein_coding
chr1	14669877	14673751	-	LL0000014375		LOC100537170	uncharacterized LOC100537170,non-coding	GCF_000002035.6_GRCz11	lincRNA
chr1	14669877	14673751	-	LL0000007843		CU138548.5	PIM PROTO ONCOGENE SERINE/THREONINE KINASE RELATED	Clone-based (Ensembl) gene	protein_coding
chr1	14692310	14699450	-	LL0000014067		LOC100330009	serine/threonine-protein kinase pim-3	GCF_000002035.6_GRCz11	protein_coding
chr1	14695832	14785255	+	LL0000015267		LOC101886102	uncharacterized LOC101886102	GCF_000002035.6_GRCz11	protein_coding
chr1	14760494	14762849	+	LL0000014079		LOC100330441	uncharacterized LOC100330441	GCF_000002035.6_GRCz11	protein_coding
chr1	14771626	14774658	+	LL0000016241		LOC103911961	uncharacterized LOC103911961,non-coding	GCF_000002035.6_GRCz11	lincRNA
chr1	15137901	15203357	+	LL0000021415	ZDB-GENE-120206-1	pcdh7a	protocadherin 7a	ZFIN	protein_coding
chr1	15226268	15257315	+	LL0000012083	ZDB-GENE-140106-144	hgsnat	heparan-alpha-glucosaminide N-acetyltransferase	ZFIN	protein_coding
chr1	15258641	15285455	+	LL0000021748	ZDB-GENE-070112-990	pi4k2b	phosphatidylinositol 4-kinase type 2 beta	ZFIN	protein_coding
chr1	15288187	15290504	-	LL0000032317		XLOC_001104		Cufflinks; see BLAST hits		low confidence,XP_695016.2,LOC566646,uncharacterized LOC566646, transcript variant X1	no Blast hit
chr1	15291025	15329277	-	LL0000008970	ZDB-GENE-130206-12	dlc1	DLC1 Rho GTPase activating protein	ZFIN	protein_coding
chr1	15355857	15498152	-	LL0000007078		CR848833.1		Clone-based (Ensembl) gene	lincRNA
chr1	15618813	15620119	-	LL0000032318		XLOC_001106		Cufflinks; see BLAST hits		low confidence,XP_021335881.1,LOC108191691,slit homolog 2 protein-like, transcript variant X2	no Blast hit
chr1	15618813	15797663	-	LL0000024587		SGCZ	sarcoglycan zeta [Source:NCBI gene;Acc:100334126]	HGNC symbol	protein_coding
chr1	15919866	15923310	-	LL0000032319		XLOC_001107		Cufflinks; see BLAST hits		low confidence,NP_001106978.1,il23r,interleukin 23 receptor	no Blast hit
chr1	15943307	15944916	-	LL0000032320		XLOC_001108		Cufflinks; see BLAST hits		no Blast hit	no Blast hit
chr1	15953423	15955549	-	LL0000032321		XLOC_001109		Cufflinks; see BLAST hits		no Blast hit	no Blast hit
chr1	15955721	15956584	-	LL0000032322		XLOC_001110		Cufflinks; see BLAST hits		low confidence,XP_009304440.1,thsd7bb,thrombospondin, type I, domain containing 7Bb	no Blast hit
chr1	15958172	15959887	-	LL0000032323		XLOC_001111		Cufflinks; see BLAST hits		low confidence,XP_021335606.1,LOC101886098,Fc receptor-like protein 5, transcript variant X5	no Blast hit
chr1	15982442	15983753	-	LL0000032324		XLOC_001112		Cufflinks; see BLAST hits		low confidence,XP_005170414.1,zgc:171435,zgc:171435, transcript variant X2	no Blast hit
chr1	15995727	15997982	-	LL0000032325		XLOC_001113		Cufflinks; see BLAST hits		high confidence,NP_001129452.1,zgc:194285,zgc:194285	no Blast hit
chr1	16024478	16026265	-	LL0000032326		XLOC_001114		Cufflinks; see BLAST hits		low confidence,NP_001025454.1,ldlra,low density lipoprotein receptor a	no Blast hit
chr1	16026367	16031307	-	LL0000032327		XLOC_001115		Cufflinks; see BLAST hits		moderate confidence,NP_001106978.1,il23r,interleukin 23 receptor	no Blast hit
chr1	16040847	16042379	-	LL0000032328		XLOC_001116		Cufflinks; see BLAST hits		no Blast hit	no Blast hit
chr1	16045667	16047793	-	LL0000032329		XLOC_001117		Cufflinks; see BLAST hits		no Blast hit	no Blast hit
chr1	16073887	16220235	+	LL0000031380	ZDB-GENE-050522-381	tusc3	tumor suppressor candidate 3	ZFIN	protein_coding
chr1	16392318	16394984	-	LL0000010296	ZDB-GENE-060110-1	fgf20a	fibroblast growth factor 20a	ZFIN	protein_coding
chr1	16396870	16458257	+	LL0000019019	ZDB-GENE-070713-1	micu3a	mitochondrial calcium uptake family, member 3a	ZFIN	protein_coding
chr1	16460124	16461398	-	LL0000007586		CT573256.1	serine/threonine-protein kinase VRK1-like [Source:NCBI gene;Acc:794952]	Clone-based (Ensembl) gene	processed_pseudogene
chr1	16463079	16480213	+	LL0000031893	ZDB-GENE-030131-8312	vps37a	VPS37A subunit of ESCRT-I	ZFIN	protein_coding
chr1	16482909	16483936	-	LL0000017823		LOC110439786	uncharacterized LOC110439786,non-coding	GCF_000002035.6_GRCz11	lincRNA
chr1	16484210	16507812	-	LL0000019721	ZDB-GENE-050913-66	mtmr7b	myotubularin related protein 7b	ZFIN	protein_coding
chr1	16520015	16619858	+	LL0000019745	ZDB-GENE-070619-5	mtus1b	microtubule associated tumor suppressor 1b	ZFIN	protein_coding
chr1	16621316	16654189	+	LL0000021434	ZDB-GENE-030131-428	pcm1	pericentriolar material 1	ZFIN	protein_coding
chr1	16654254	16665044	-	LL0000001439	ZDB-GENE-040426-1512	asah1b	N-acylsphingosine amidohydrolase (acid ceramidase) 1b	ZFIN	protein_coding
chr1	16667976	16669126	-	LL0000016253		LOC103912018	uncharacterized LOC103912018,non-coding	GCF_000002035.6_GRCz11	lincRNA
chr1	16671586	16689023	-	LL0000010855	ZDB-GENE-050417-324	frg1	FSHD region gene 1	ZFIN	protein_coding
chr1	16843334	16845319	-	LL0000032330		XLOC_001124		Cufflinks; see BLAST hits		low confidence,XP_021333992.1,fam160b2,family with sequence similarity 160, member B2, transcript variant X2	no Blast hit
chr1	17172252	17176031	+	LL0000032218		XLOC_000210		Cufflinks; see BLAST hits		moderate confidence,NP_001164503.1,si:rp71-36n21.1,si:rp71-36n21.1	no Blast hit
chr1	17186936	17187927	+	LL0000032219		XLOC_000211		Cufflinks; see BLAST hits		low confidence,XP_021335606.1,LOC101886098,Fc receptor-like protein 5, transcript variant X5	no Blast hit
chr1	17227217	17228730	-	LL0000032331		XLOC_001132		Cufflinks; see BLAST hits		low confidence,NP_001315129.1,si:dkey-77f5.3,si:dkey-77f5.3	low confidence,NP_001307607.1,SETMAR,histone-lysine N-methyltransferase SETMAR isoform 7
chr1	17330461	17361155	-	LL0000002906		BX511093.1		Clone-based (Ensembl) gene	lincRNA
chr1	17374746	17524927	+	LL0000010153	ZDB-GENE-050425-1	fat1a	FAT atypical cadherin 1a	ZFIN	protein_coding
chr1	17465956	17466455	-	LL0000003016		BX537280.1		Clone-based (Ensembl) gene	processed_transcript
chr1	17527342	17536583	+	LL0000004928	ZDB-GENE-011210-1	casp3a	caspase 3, apoptosis-related cysteine peptidase a	ZFIN	protein_coding
chr1	17537322	17587630	-	LL0000000203	ZDB-GENE-050809-115	acsl1a	acyl-CoA synthetase long chain family member 1a	ZFIN	protein_coding
chr1	17593392	17595045	+	LL0000012032	ZDB-GENE-040824-6	helt	helt bHLH transcription factor	ZFIN	protein_coding
chr1	17618001	17675106	-	LL0000025430	ZDB-GENE-080225-6	si:ch211-197n1.2	si:ch211-197n1.2	ZFIN	protein_coding
chr1	17618015	17675037	-	LL0000027380	ZDB-GENE-090313-282	si:dkey-256e7.5	si:dkey-256e7.5	ZFIN	protein_coding
chr1	17676745	17679089	+	LL0000028622	ZDB-GENE-030131-5275	slc25a4	solute carrier family 25 member 4	ZFIN	protein_coding
chr1	17677373	17715493	-	LL0000027381	ZDB-GENE-090313-283	si:dkey-256e7.8	si:dkey-256e7.8	ZFIN	protein_coding
chr1	17681036	17693265	-	LL0000005519	ZDB-GENE-030131-9405	cfap97	cilia and flagella associated protein 97	ZFIN	protein_coding
chr1	17695426	17699722	+	LL0000001040	ZDB-GENE-070308-1	ankrd37	ankyrin repeat domain 37	ZFIN	protein_coding
chr1	17699471	17711698	-	LL0000031562	ZDB-GENE-030131-8726	ufsp2	ufm1-specific peptidase 2	ZFIN	protein_coding
chr1	17721853	17735861	-	LL0000021545	ZDB-GENE-050505-1	pdlim3a	PDZ and LIM domain 3a	ZFIN	protein_coding
chr1	17741014	17904793	-	LL0000029154	ZDB-GENE-070308-2	sorbs2a	sorbin and SH3 domain containing 2a	ZFIN	protein_coding
chr1	17858380	17861928	+	LL0000006899		CR774194.1		Clone-based (Ensembl) gene	processed_transcript
chr1	17892920	17899252	+	LL0000030377	ZDB-GENE-040219-7	tlr3	toll-like receptor 3	ZFIN	protein_coding
chr1	17900306	17912645	+	LL0000008616	ZDB-GENE-061103-601	cyp4v8	cytochrome P450, family 4, subfamily V, polypeptide 8	ZFIN	protein_coding
chr1	17966903	17970146	+	LL0000015136		LOC101885541	uncharacterized LOC101885541,non-coding	GCF_000002035.6_GRCz11	lincRNA
chr1	17966903	17970146	+	LL0000032220		XLOC_000220		Cufflinks; see BLAST hits		low confidence,XP_002663431.2,si:ch73-7i4.2,si:ch73-7i4.2	low confidence,XP_011539314.1,FGR,tyrosine-protein kinase Fgr isoform X3
chr1	18002567	18004302	-	LL0000006547		CR391953.1		Clone-based (Ensembl) gene	lincRNA
chr1	18061682	18063637	-	LL0000000699		AL929210.2		Clone-based (Ensembl) gene	lincRNA
chr1	18141856	18145110	+	LL0000032221		XLOC_000221		Cufflinks; see BLAST hits		no Blast hit	no Blast hit
chr1	18156453	18157849	+	LL0000032222		XLOC_000222		Cufflinks; see BLAST hits		low confidence,XP_021324890.1,si:dkey-71d15.2,si:dkey-71d15.2, transcript variant X3	no Blast hit
chr1	18161773	18162877	+	LL0000032223		XLOC_000223		Cufflinks; see BLAST hits		no Blast hit	no Blast hit
chr1	18162992	18163946	+	LL0000032224		XLOC_000224		Cufflinks; see BLAST hits		low confidence,XP_021325262.1,rabgap1l,RAB GTPase activating protein 1-like	no Blast hit
chr1	18166914	18168601	+	LL0000015197		LOC101885801	uncharacterized LOC101885801,non-coding	GCF_000002035.6_GRCz11	lincRNA
chr1	18171714	18174990	-	LL0000015223		LOC101885905	uncharacterized LOC101885905,non-coding	GCF_000002035.6_GRCz11	lincRNA
chr1	18171714	18174990	-	LL0000032332		XLOC_001144		Cufflinks; see BLAST hits		low confidence,XP_021324770.1,si:dkey-29d5.2,si:dkey-29d5.2	no Blast hit
chr1	18186943	18237830	-	LL0000000698		AL929210.1		Clone-based (Ensembl) gene	processed_transcript
chr1	18234470	18315145	+	LL0000006576		CR392335.1		Clone-based (Ensembl) gene	protein_coding
chr1	18250779	18336878	-	LL0000019724	ZDB-GENE-990415-155	mtnr1aa	melatonin receptor 1A a	ZFIN	protein_coding
chr1	18363509	18543793	-	LL0000013418	ZDB-GENE-080424-7	klhl5	kelch-like family member 5	ZFIN	protein_coding
chr1	18550543	18573837	+	LL0000026970	ZDB-GENE-090313-219	si:dkey-192k22.2	si:dkey-192k22.2	ZFIN	protein_coding
chr1	18575166	18592077	-	LL0000009965	ZDB-GENE-070410-52	fam114a1	family with sequence similarity 114 member A1	ZFIN	protein_coding
chr1	18592352	18592423	+	LL0000032225		XLOC_000228		Cufflinks; see BLAST hits		low confidence,NP_001006101.1,rad51c,RAD51 paralog C	low confidence,XP_016855991.1,DPH2,2-(3-amino-3-carboxypropyl)histidine synthase subunit 2 isoform X1
chr1	18594133	18615172	-	LL0000013363	ZDB-GENE-011116-1	klf3	Kruppel-like factor 3 (basic)	ZFIN	protein_coding
chr1	18642117	18777214	-	LL0000029991	ZDB-GENE-060710-1	tbc1d1	TBC1 (tre-2/USP6, BUB2, cdc16) domain family, member 1	ZFIN	protein_coding
chr1	18779168	18803919	-	LL0000021665	ZDB-GENE-040426-2218	pgm2	phosphoglucomutase 2	ZFIN	protein_coding
chr1	18810891	18811517	-	LL0000030692	ZDB-GENE-090313-198	tmsb5	thymosin beta 5	ZFIN	protein_coding
chr1	18811679	18821696	+	LL0000028633	ZDB-GENE-040426-1722	slc25a51a	solute carrier family 25 member 51a	ZFIN	protein_coding
chr1	18829225	18833440	+	LL0000014307		LOC100535985	uncharacterized LOC100535985,non-coding	GCF_000002035.6_GRCz11	lincRNA
chr1	18840608	18860749	-	LL0000039152	ZDB-GENE-081022-208	zgc:195282	zgc:195282	ZFIN	protein_coding
chr1	18863060	18937199	+	LL0000023824	ZDB-GENE-030131-8693	rnf38	ring finger protein 38	ZFIN	protein_coding
chr1	18942403	18946831	-	LL0000015300		LOC101886347	uncharacterized LOC101886347,non-coding	GCF_000002035.6_GRCz11	lincRNA
chr1	18949430	18951446	-	LL0000032333		XLOC_001155		Cufflinks; see BLAST hits		moderate confidence,XP_001344635.2,LOC100005637,uncharacterized LOC100005637	no Blast hit
chr1	18953813	18956196	+	LL0000032226		XLOC_000232		Cufflinks; see BLAST hits		no Blast hit	no Blast hit
chr1	18965595	19070323	+	LL0000013672	ZDB-GENE-090312-153	limch1a	LIM and calponin homology domains 1a	ZFIN	protein_coding
chr1	19073670	19079960	-	LL0000021734	ZDB-GENE-090313-51	phox2ba	paired like homeobox 2Ba	ZFIN	protein_coding
chr1	19083501	19092155	+	LL0000009888	ZDB-GENE-041010-180	exosc9	exosome component 9	ZFIN	protein_coding
chr1	19094515	19112939	+	LL0000022889	ZDB-GENE-090313-52	ptpn9b	protein tyrosine phosphatase non-receptor type 9b	ZFIN	protein_coding
chr1	19118723	19274218	-	LL0000022896	ZDB-GENE-070615-38	ptprdb	protein tyrosine phosphatase receptor type Db	ZFIN	protein_coding
chr1	19252853	19264986	+	LL0000016792		LOC108190005	uncharacterized LOC108190005,non-coding	GCF_000002035.6_GRCz11	lincRNA
chr1	19303182	19331532	+	LL0000028114	ZDB-GENE-060810-149	si:dkeyp-118a3.2	si:dkeyp-118a3.2	ZFIN	protein_coding
chr1	19332837	19346048	+	LL0000031426	ZDB-GENE-040718-249	tyrp1b	tyrosinase-related protein 1b	ZFIN	protein_coding
chr1	19353048	19403539	-	LL0000023303	ZDB-GENE-030131-9612	rbm47	RNA binding motif protein 47	ZFIN	protein_coding
chr1	19404865	19468966	+	LL0000005822	ZDB-GENE-030408-2	clockb	clock circadian regulator b	ZFIN	protein_coding
chr1	19418380	19431510	-	LL0000013528	ZDB-GENE-060719-1	lap3	leucine aminopeptidase 3	ZFIN	protein_coding
chr1	19468916	19502378	-	LL0000013342	ZDB-GENE-050916-2	kitb	KIT proto-oncogene, receptor tyrosine kinase b	ZFIN	protein_coding
chr1	19515228	19517791	+	LL0000005832	ZDB-GENE-061207-64	clrn2	clarin 2	ZFIN	protein_coding
chr1	19535120	19561801	+	LL0000028963	ZDB-GENE-030131-105	smc2	structural maintenance of chromosomes 2	ZFIN	protein_coding
chr1	19535144	19537359	+	LL0000027333	ZDB-GENE-061207-63	si:dkey-245p14.4	si:dkey-245p14.4	ZFIN	protein_coding
chr1	19562750	19599298	-	LL0000009364	ZDB-GENE-061207-66	ecpas	Ecm29 proteasome adaptor and scaffold	ZFIN	protein_coding
chr1	19602196	19637150	+	LL0000010196	ZDB-GENE-090313-270	fbxo10	F-box protein 10	ZFIN	protein_coding
chr1	19637312	19648227	-	LL0000022271	ZDB-GENE-050522-251	polr1e	RNA polymerase I subunit E	ZFIN	protein_coding
chr1	19649545	19665774	+	LL0000030542	ZDB-GENE-040426-2254	tmem192	transmembrane protein 192	ZFIN	protein_coding
chr1	19667947	19686322	-	LL0000001161	ZDB-GENE-090313-116	apela	apelin receptor early endogenous ligand	ZFIN	protein_coding
chr1	19689741	19701056	-	LL0000014311		LOC100536104	uncharacterized LOC100536104,non-coding	GCF_000002035.6_GRCz11	lincRNA
chr1	19690866	19694326	-	LL0000002645		BX323590.2	uncharacterized LOC100536104 [Source:NCBI gene;Acc:100536104]	Clone-based (Ensembl) gene	lincRNA
chr1	19707950	19758423	-	LL0000018662	ZDB-GENE-081112-1	march1	membrane-associated ring finger (C3HC4) 1	ZFIN	protein_coding
chr1	19758523	19764632	-	LL0000030405	ZDB-GENE-050522-20	tma16	translation machinery associated 16 homolog	ZFIN	protein_coding
chr1	19764785	19805402	+	LL0000026050	ZDB-GENE-090312-31	si:ch211-42i9.8	si:ch211-42i9.8	ZFIN	protein_coding
chr1	19787281	19788211	-	LL0000002646		BX323590.3		Clone-based (Ensembl) gene	antisense
chr1	19806823	19832019	+	LL0000002644		BX323590.1	zinc finger and BTB domain containing 5 [Source:NCBI gene;Acc:797291]	Clone-based (Ensembl) gene	processed_transcript
chr1	19808395	19821003	+	LL0000038332	ZDB-GENE-090313-117	zbtb5	zinc finger and BTB domain containing 5	ZFIN	protein_coding
chr1	19835803	19845539	-	LL0000011711	ZDB-GENE-040426-1847	grhprb	glyoxylate reductase/hydroxypyruvate reductase b	ZFIN	protein_coding
chr1	19849124	19888131	+	LL0000031444		UBA6	si:dkey-82j4.2 [Source:ZFIN;Acc:ZDB-GENE-090312-139]	HGNC symbol	protein_coding
chr1	19896260	19995056	+	LL0000001155	ZDB-GENE-090313-73	apbb2b	amyloid beta (A4) precursor protein-binding, family B, member 2b	ZFIN	protein_coding
chr1	19997675	20050869	-	LL0000014567		LOC101882573	putative methyltransferase NSUN7	GCF_000002035.6_GRCz11	protein_coding
chr1	20063502	20068155	-	LL0000018897	ZDB-GENE-040426-2328	mettl14	methyltransferase like 14	ZFIN	protein_coding
chr1	20068965	20142469	+	LL0000022703	ZDB-GENE-090313-45	prss12	serine protease 12	ZFIN	protein_coding
chr1	20146595	20273258	-	LL0000020107	ZDB-GENE-090312-199	ndst3	N-deacetylase/N-sulfotransferase (heparan glucosaminyl) 3	ZFIN	protein_coding
chr1	20481109	20553129	-	LL0000007190		CR927456.1		Clone-based (Ensembl) gene	processed_transcript
chr1	20556067	20593788	-	LL0000031601	ZDB-GENE-060616-129	ugt8	UDP glycosyltransferase 8	ZFIN	protein_coding
chr1	20593653	20607152	+	LL0000025102	ZDB-GENE-100922-47	si:ch211-142c4.1	si:ch211-142c4.1	ZFIN	protein_coding
chr1	20635190	20706298	+	LL0000029301	ZDB-GENE-090311-24	spock3	SPARC (osteonectin), cwcv and kazal like domains proteoglycan 3	ZFIN	protein_coding
chr1	20728342	20826044	-	LL0000030363	ZDB-GENE-041020-1	tll1	tolloid-like 1	ZFIN	protein_coding
chr1	20839482	20911297	-	LL0000006134	ZDB-GENE-090313-68	cpe	carboxypeptidase E	ZFIN	protein_coding
chr1	20916551	20928772	-	LL0000019648	ZDB-GENE-040426-2670	msmo1	methylsterol monooxygenase 1	ZFIN	protein_coding
chr1	20929437	20930443	-	LL0000007636		CT583646.1		Clone-based (Ensembl) gene	processed_transcript
chr1	20931221	20970291	-	LL0000013392	ZDB-GENE-090312-193	klhl2	kelch-like family member 2	ZFIN	protein_coding
chr1	20936711	20938512	+	LL0000007637		CT583646.2	si:dkeyp-72g6.2 [Source:NCBI gene;Acc:101882260]	Clone-based (Ensembl) gene	protein_coding
chr1	20980975	20986124	-	LL0000002601		BX323083.1		Clone-based (Ensembl) gene	processed_transcript
chr1	21135012	21204717	-	LL0000027378	ZDB-GENE-090313-280	si:dkey-253i9.4	si:dkey-253i9.4	ZFIN	protein_coding
chr1	21232735	21234520	-	LL0000032334		XLOC_001185		Cufflinks; see BLAST hits		no Blast hit	no Blast hit
chr1	21234630	21237557	-	LL0000032335		XLOC_001186		Cufflinks; see BLAST hits		no Blast hit	no Blast hit
chr1	21242836	21297748	+	LL0000020557	ZDB-GENE-080221-1	npy1r	neuropeptide Y receptor Y1	ZFIN	protein_coding
chr1	21309386	21312596	+	LL0000018840	ZDB-GENE-041121-4	med28	mediator complex subunit 28	ZFIN	protein_coding
chr1	21313165	21321482	-	LL0000030482	ZDB-GENE-040822-12	tmem144a	transmembrane protein 144a	ZFIN	protein_coding
chr1	21331599	21409916	-	LL0000011714	ZDB-GENE-020125-3	gria2a	glutamate receptor, ionotropic, AMPA 2a	ZFIN	protein_coding
chr1	21423005	21483908	-	LL0000011392	ZDB-GENE-010410-2	glrba	glycine receptor, beta a	ZFIN	protein_coding
chr1	21495283	21538697	-	LL0000031996	ZDB-GENE-090313-277	wdr19	WD repeat domain 19	ZFIN	protein_coding
chr1	21540453	21563040	-	LL0000020044	ZDB-GENE-040426-737	ncapd3	non-SMC condensin II complex, subunit D3	ZFIN	protein_coding
chr1	21563305	21573013	+	LL0000022564	ZDB-GENE-051113-100	primpol	primase and polymerase (DNA-directed)	ZFIN	protein_coding
chr1	21576674	21599571	-	LL0000000297	ZDB-GENE-070816-2	adamtsl7	ADAMTS-like 7	ZFIN	protein_coding
chr1	21610471	21714025	-	LL0000038365	ZDB-GENE-030102-2	zcchc7	zinc finger, CCHC domain containing 7	ZFIN	protein_coding
chr1	21720971	21723369	-	LL0000025065	ZDB-GENE-090312-73	si:ch211-134c9.2	si:ch211-134c9.2	ZFIN	protein_coding
chr1	21725821	21825612	+	LL0000021324	ZDB-GENE-001030-2	pax5	paired box 5	ZFIN	protein_coding
chr1	21859546	21881821	-	LL0000018867	ZDB-GENE-990603-5	melk	maternal embryonic leucine zipper kinase	ZFIN	protein_coding
chr1	21882298	21934165	-	LL0000010868		frmpd1	FERM and PDZ domain containing 1, transcript variant X2	GCF_000002035.6_GRCz11
chr1	21893289	21909608	-	LL0000010869	ZDB-GENE-090313-137	frmpd1a	FERM and PDZ domain containing 1a	ZFIN	protein_coding
chr1	21937166	21971913	+	LL0000013247	ZDB-GENE-070209-38	kdm4c	lysine (K)-specific demethylase 4C	ZFIN	protein_coding
chr1	22002649	22235544	+	LL0000009031	ZDB-GENE-030616-623	dnah6	dynein, axonemal, heavy chain 6	ZFIN	protein_coding
chr1	22235692	22370989	-	LL0000026534	ZDB-GENE-090313-161	si:ch73-380n15.2	si:ch73-380n15.2	ZFIN	protein_coding
chr1	22387701	22439167	-	LL0000005655	ZDB-GENE-040108-1	chrnb3a	cholinergic receptor, nicotinic, beta polypeptide 3a	ZFIN	protein_coding
chr1	22427135	22428853	+	LL0000027229	ZDB-GENE-100922-134	si:dkey-234d14.2	si:dkey-234d14.2	ZFIN	protein_coding
chr1	22481723	22512136	-	LL0000005647	ZDB-GENE-090312-91	chrna6	cholinergic receptor, nicotinic, alpha 6	ZFIN	protein_coding
chr1	22542457	22594338	-	LL0000005652		chrnb2a	cholinergic receptor, nicotinic, beta 2a [Source:ZFIN;Acc:ZDB-GENE-090312-169]	ZFIN	protein_coding
chr1	22647756	22652424	-	LL0000031542	ZDB-GENE-030131-3844	uchl1	ubiquitin carboxyl-terminal esterase L1 (ubiquitin thiolesterase)	ZFIN	protein_coding
chr1	22654875	22665126	+	LL0000001110	ZDB-GENE-030131-9076	anxa5b	annexin A5b	ZFIN	protein_coding
chr1	22663723	22674613	-	LL0000010795		FP245458.1		Clone-based (Ensembl) gene	processed_transcript
chr1	22685950	22691182	-	LL0000010313	ZDB-GENE-070410-95	fgfbp2b	fibroblast growth factor binding protein 2b	ZFIN	protein_coding
chr1	22691256	22703664	+	LL0000039381	ZDB-GENE-040426-1218	zmynd10	zinc finger, MYND-type containing 10	ZFIN	protein_coding
chr1	22712889	22757213	-	LL0000022643	ZDB-GENE-031003-1	prom1b	prominin 1 b	ZFIN	protein_coding
chr1	22770255	22803147	-	LL0000029963	ZDB-GENE-030131-4025	tapt1b	transmembrane anterior posterior transformation 1b	ZFIN	protein_coding
chr1	22805075	22834851	-	LL0000013576	ZDB-GENE-990415-137	ldb2b	LIM domain binding 2b	ZFIN	protein_coding
chr1	22840209	22841184	-	LL0000032336		XLOC_001211		Cufflinks; see BLAST hits		no Blast hit	no Blast hit
chr1	22842935	22873915	+	LL0000003635		BX908795.1		Clone-based (Ensembl) gene	protein_coding
chr1	22843750	22851481	-	LL0000022987	ZDB-GENE-050522-320	qdprb1	quinoid dihydropteridine reductase b1	ZFIN	protein_coding
chr1	22851261	22876174	+	LL0000011833	ZDB-GENE-030131-6794	gtf2e2	general transcription factor IIE, polypeptide 2, beta	ZFIN	protein_coding
chr1	22857753	22861348	-	LL0000028988		SMIM18	si:dkey-92j12.6 [Source:ZFIN;Acc:ZDB-GENE-100922-33]	HGNC symbol	protein_coding
chr1	22943546	23157716	-	LL0000000371	ZDB-GENE-030131-7856	adgrl3.1	adhesion G protein-coupled receptor L3.1	ZFIN	protein_coding
chr1	23161231	23240763	+	LL0000028028	ZDB-GENE-090313-354	si:dkey-92j12.5	si:dkey-92j12.5	ZFIN	protein_coding
chr1	23243043	23274038	-	LL0000023560	ZDB-GENE-070410-99	rfc1	replication factor C (activator 1) 1	ZFIN	protein_coding
chr1	23261857	23292761	+	LL0000006844		CR759875.1		Clone-based (Ensembl) gene	protein_coding
chr1	23269503	23274521	-	LL0000023939	ZDB-GENE-030131-8646	rpl9	ribosomal protein L9	ZFIN	protein_coding
chr1	23274710	23283468	+	LL0000013660	ZDB-GENE-040426-1528	lias	lipoic acid synthetase	ZFIN	protein_coding
chr1	23283532	23295559	+	LL0000031564	ZDB-GENE-011022-1	ugdh	UDP-glucose 6-dehydrogenase	ZFIN	protein_coding
chr1	23297623	23308327	-	LL0000028986	ZDB-GENE-040426-22	smim14	small integral membrane protein 14	ZFIN	protein_coding
chr1	23311617	23322969	+	LL0000031485	ZDB-GENE-980605-9	ube2kb	ubiquitin-conjugating enzyme E2Kb (UBC1 homolog, yeast)	ZFIN	protein_coding
chr1	23322913	23370618	-	LL0000021557	ZDB-GENE-040426-1612	pds5a	PDS5 cohesin associated factor A	ZFIN	protein_coding
chr1	23372470	23396454	+	LL0000019928	ZDB-GENE-061103-451	n4bp2	NEDD4 binding protein 2	ZFIN	protein_coding
chr1	23394263	23399661	+	LL0000023660	ZDB-GENE-060228-7	rhoh	ras homolog family member H	ZFIN	protein_coding
chr1	23406403	23417937	+	LL0000005649	ZDB-GENE-090312-63	chrna9	cholinergic receptor, nicotinic, alpha 9	ZFIN	protein_coding
chr1	23443486	23447297	-	LL0000015401		LOC101886843	uncharacterized LOC101886843,non-coding	GCF_000002035.6_GRCz11	lincRNA
chr1	23462519	23462591	-	LL0000032337		XLOC_001220		Cufflinks; see BLAST hits		low confidence,NP_001025245.2,kcnk6,potassium channel, subfamily K, member 6	low confidence,NP_057291.1,CPSF3,cleavage and polyadenylation specificity factor subunit 3 isoform a
chr1	23463463	23463535	-	LL0000032338		XLOC_001221		Cufflinks; see BLAST hits		low confidence,XP_021329039.1,si:dkey-12h9.6,si:dkey-12h9.6, transcript variant X1	low confidence,NP_115876.3,ACTRT3,actin-related protein T3
chr1	23464172	23464244	-	LL0000032339		XLOC_001222		Cufflinks; see BLAST hits		low confidence,XP_021331226.1,LOC110439489,uncharacterized LOC110439489	no Blast hit
chr1	23466627	23466699	-	LL0000032340		XLOC_001224		Cufflinks; see BLAST hits		low confidence,NP_001007330.2,slc7a3a,solute carrier family 7 (cationic amino acid transporter, y+ system), member 3a	low confidence,NP_001334651.1,DYRK1A,dual specificity tyrosine-phosphorylation-regulated kinase 1A isoform 2
chr1	23471565	23471637	-	LL0000032341		XLOC_001229		Cufflinks; see BLAST hits		low confidence,XP_021329039.1,si:dkey-12h9.6,si:dkey-12h9.6, transcript variant X1	no Blast hit
chr1	23476098	23476170	-	LL0000032342		XLOC_001234		Cufflinks; see BLAST hits		low confidence,NP_001003836.1,cpsf3,cleavage and polyadenylation specific factor 3	no Blast hit
chr1	23476944	23477016	-	LL0000032343		XLOC_001235		Cufflinks; see BLAST hits		low confidence,NP_001038409.1,jtb,jumping translocation breakpoint	low confidence,NP_005064.1,SLC15A1,solute carrier family 15 member 1
chr1	23489241	23490316	+	LL0000017552		LOC110439258	uncharacterized LOC110439258,non-coding	GCF_000002035.6_GRCz11	lincRNA
chr1	23491008	23493732	+	LL0000017551		LOC110439257	uncharacterized LOC110439257	GCF_000002035.6_GRCz11	protein_coding
chr1	23493795	23506392	+	LL0000028148	ZDB-GENE-090313-379	si:dkeyp-26a9.2	si:dkeyp-26a9.2	ZFIN	protein_coding
chr1	23506520	23558033	-	LL0000010032	ZDB-GENE-090313-380	fam184b	family with sequence similarity 184 member B	ZFIN	protein_coding
chr1	23559478	23573233	+	LL0000020045	ZDB-GENE-041111-282	ncapg	non-SMC condensin I complex, subunit G	ZFIN	protein_coding
chr1	23573118	23596391	-	LL0000013565	ZDB-GENE-030131-6300	lcorl	ligand dependent nuclear receptor corepressor-like	ZFIN	protein_coding
chr1	23596731	23598674	-	LL0000028149	ZDB-GENE-100922-50	si:dkeyp-26a9.7	si:dkeyp-26a9.7	ZFIN	protein_coding
chr1	23752724	23912788	+	LL0000028911	ZDB-GENE-010306-3	slit2	slit homolog 2 (Drosophila)	ZFIN	protein_coding
chr1	23866878	23866965	+	LL0000019202	ZDB-MIRNAG-041228-1	mir218a-2	microRNA 218a-2	ZFIN	miRNA
chr1	23920688	24350556	-	LL0000018306	ZDB-GENE-090311-19	lrba	LPS-responsive vesicle trafficking, beach and anchor containing	ZFIN	protein_coding
chr1	23940648	23941414	-	LL0000016794		LOC108190014	uncharacterized LOC108190014,non-coding	GCF_000002035.6_GRCz11	lincRNA
chr1	24076243	24078099	+	LL0000018507	ZDB-GENE-011101-3	mab21l2	mab-21-like 2	ZFIN	protein_coding
chr1	24336980	24343477	+	LL0000002195		BX005068.1		Clone-based (Ensembl) gene	processed_transcript
chr1	24345214	24360249	+	LL0000023990	ZDB-GENE-030131-9184	rps3a	ribosomal protein S3A	ZFIN	protein_coding
chr1	24364595	24367512	+	LL0000021875	ZDB-GENE-090312-160	pimr178	Pim proto-oncogene, serine/threonine kinase, related 178	ZFIN	protein_coding
chr1	24376394	24380533	+	LL0000038922	ZDB-GENE-080219-12	zgc:171517	zgc:171517	ZFIN	protein_coding
chr1	24376698	24463305	+	LL0000024635	ZDB-GENE-050522-481	sh3d19	SH3 domain containing 19	ZFIN	protein_coding
chr1	24382651	24391673	+	LL0000022988	ZDB-GENE-070720-19	qdprb2	quinoid dihydropteridine reductase b2	ZFIN	protein_coding
chr1	24469313	24518568	+	LL0000009999	ZDB-GENE-090312-132	fam160a1a	family with sequence similarity 160 member A1a	ZFIN	protein_coding
chr1	24520503	24558838	-	LL0000011169	ZDB-GENE-040724-131	gatb	glutamyl-tRNA(Gln) amidotransferase, subunit B	ZFIN	protein_coding
chr1	24557414	24558749	+	LL0000008740	ZDB-GENE-040426-1741	dctpp1	dCTP pyrophosphatase 1	ZFIN	protein_coding
chr1	24602557	24605806	-	LL0000032344		XLOC_001245		Cufflinks; see BLAST hits		low confidence,XP_021332294.1,LOC110439826,uncharacterized LOC110439826	no Blast hit
chr1	24602557	24605138	-	LL0000014530		LOC101882397	uncharacterized LOC101882397,non-coding	GCF_000002035.6_GRCz11	lincRNA
chr1	24611372	24612586	+	LL0000032227		XLOC_000292		Cufflinks; see BLAST hits		low confidence,NP_001038221.1,cmtm6,CKLF-like MARVEL transmembrane domain containing 6	no Blast hit
chr1	24664968	24665500	-	LL0000032345		XLOC_001246		Cufflinks; see BLAST hits		no Blast hit	low confidence,NP_001243329.2,BCO2,beta,beta-carotene 9',10'-oxygenase isoform e
chr1	24723569	24727978	-	LL0000032346		XLOC_001247		Cufflinks; see BLAST hits		high confidence,XP_003199161.1,LOC100535543,uncharacterized protein K02A2.6-like	moderate confidence,NP_001128360.1,RTL1,retrotransposon-like protein 1
chr1	24819980	24821861	+	LL0000032228		XLOC_000293		Cufflinks; see BLAST hits		low confidence,XP_021330274.1,si:ch73-194h10.3,si:ch73-194h10.3	no Blast hit
chr1	24869028	25144439	-	LL0000010235	ZDB-GENE-090313-79	fbxw7	F-box and WD repeat domain containing 7	ZFIN	protein_coding
chr1	25152241	25184205	-	LL0000030495	ZDB-GENE-030131-2401	tmem154	transmembrane protein 154	ZFIN	protein_coding
chr1	25178106	25216235	+	LL0000019426	ZDB-GENE-040801-116	mnd1	meiotic nuclear divisions 1 homolog (S. cerevisiae)	ZFIN	protein_coding
chr1	25218177	25316151	+	LL0000030472	ZDB-GENE-030131-6110	tmem131l	transmembrane 131 like	ZFIN	protein_coding
chr1	25317398	25382771	+	LL0000031079	ZDB-GENE-050327-99	trim2a	tripartite motif containing 2a	ZFIN	protein_coding
chr1	25398611	25438934	-	LL0000010331	ZDB-GENE-040826-4	fhdc1	FH2 domain containing 1	ZFIN	protein_coding
chr1	25440951	25486571	-	LL0000001250	ZDB-GENE-040426-2690	arfip1	ADP-ribosylation factor interacting protein 1 (arfaptin 1)	ZFIN	protein_coding
chr1	25489376	25496133	-	LL0000024566	ZDB-GENE-061013-293	sfrp2	secreted frizzled-related protein 2	ZFIN	protein_coding
chr1	25550053	25553066	+	LL0000014643		LOC101882989	uncharacterized LOC101882989,non-coding	GCF_000002035.6_GRCz11	lincRNA
chr1	25550053	25553066	+	LL0000032229		XLOC_000298		Cufflinks; see BLAST hits		low confidence,XP_002663431.2,si:ch73-7i4.2,si:ch73-7i4.2	no Blast hit
chr1	25555725	25557930	-	LL0000000764		AL935184.2		Clone-based (Ensembl) gene	processed_transcript
chr1	25593028	25648898	-	LL0000027564		si:dkey-30k22.7	si:dkey-30k22.7 [Source:ZFIN;Acc:ZDB-GENE-090313-302]	ZFIN	protein_coding
chr1	25650917	25667413	+	LL0000022169	ZDB-GENE-040426-2787	plrg1	pleiotropic regulator 1	ZFIN	protein_coding
chr1	25669799	25679383	-	LL0000010324	ZDB-GENE-040426-1998	fgg	fibrinogen gamma chain	ZFIN	protein_coding
chr1	25696798	25698039	+	LL0000018303	ZDB-GENE-060720-1	lrata	lecithin retinol acyltransferase a	ZFIN	protein_coding
chr1	25707181	25708917	+	LL0000014678		LOC101883163	uncharacterized LOC101883163	GCF_000002035.6_GRCz11	protein_coding
chr1	25709813	25712510	-	LL0000000763		AL935184.1		Clone-based (Ensembl) gene	processed_transcript
chr1	25713490	25714906	-	LL0000014377		LOC100537259	uncharacterized LOC100537259	GCF_000002035.6_GRCz11	protein_coding
chr1	25713490	25714906	-	LL0000032347		XLOC_001259		Cufflinks; see BLAST hits		high confidence,XP_021332189.1,LOC100537259,uncharacterized LOC100537259, transcript variant X2	low confidence,NP_055294.1,ADAMDEC1,ADAM DEC1 isoform 1 precursor
chr1	25719891	25721702	+	LL0000027563	ZDB-GENE-090313-301	si:dkey-30k22.5	si:dkey-30k22.5	ZFIN	protein_coding
chr1	25729160	25734689	+	LL0000020558	ZDB-GENE-040924-8	npy2r	neuropeptide Y receptor Y2	ZFIN	protein_coding
chr1	25737767	25749888	-	LL0000018628	ZDB-GENE-080225-36	map9	microtubule-associated protein 9	ZFIN	protein_coding
chr1	25783801	25799051	+	LL0000011867	ZDB-GENE-050417-230	gucy1a1	guanylate cyclase 1 soluble subunit alpha 1	ZFIN	protein_coding
chr1	25801634	25842910	+	LL0000011869	ZDB-GENE-090313-160	gucy1b1	guanylate cyclase 1 soluble subunit beta 1	ZFIN	protein_coding
chr1	25848231	25851575	+	LL0000009938	ZDB-GENE-991019-5	fabp2	fatty acid binding protein 2, intestinal	ZFIN	protein_coding
chr1	25852659	25884477	-	LL0000008347		CU929073.1		Clone-based (Ensembl) gene	lincRNA
chr1	25886437	25911901	-	LL0000031736	ZDB-GENE-090312-168	usp53b	ubiquitin specific peptidase 53b	ZFIN	protein_coding
chr1	25917577	25936711	-	LL0000019915	ZDB-GENE-040426-1853	myoz2b	myozenin 2b	ZFIN	protein_coding
chr1	25959084	25966411	-	LL0000029763	ZDB-GENE-101230-1	synpo2b	synaptopodin 2b	ZFIN	protein_coding
chr1	26011479	26023678	-	LL0000025105	ZDB-GENE-090313-35	si:ch211-145b13.5	si:ch211-145b13.5	ZFIN	protein_coding
chr1	26012668	26045715	+	LL0000002606		BX323448.1		Clone-based (Ensembl) gene	protein_coding
chr1	26025182	26027479	-	LL0000025106	ZDB-GENE-090313-36	si:ch211-145b13.6	si:ch211-145b13.6	ZFIN	protein_coding
chr1	26034850	26045584	-	LL0000011535	ZDB-GENE-070928-32	gpank1	G patch domain and ankyrin repeats 1	ZFIN	protein_coding
chr1	26046146	26071535	-	LL0000021481	ZDB-GENE-040426-1920	pdcd4a	programmed cell death 4a	ZFIN	protein_coding
chr1	26071839	26097367	+	LL0000019780	ZDB-GENE-050208-44	mxd4	MAX dimerization protein 4	ZFIN	protein_coding
chr1	26099250	26103232	+	LL0000020141	ZDB-GENE-040426-1781	ndufb6	NADH:ubiquinone oxidoreductase subunit B	ZFIN	protein_coding
chr1	26103349	26109961	+	LL0000030829	ZDB-GENE-030131-6401	toporsa	topoisomerase I binding, arginine/serine-rich a	ZFIN	protein_coding
chr1	26110985	26139410	+	LL0000019678	ZDB-GENE-040426-1505	mtap	methylthioadenosine phosphorylase	ZFIN	protein_coding
chr1	26127670	26132205	-	LL0000005384	ZDB-GENE-081104-306	cdkn2a/b	cyclin-dependent kinase inhibitor 2A/B (p15, inhibits CDK4)	ZFIN	protein_coding
chr1	26183739	26185594	-	LL0000007583		CT573245.1		Clone-based (Ensembl) gene	processed_transcript
chr1	26250729	26294995	-	LL0000008509	ZDB-GENE-090313-179	cxxc4	CXXC finger 4	ZFIN	protein_coding
chr1	26356205	26402046	+	LL0000030179	ZDB-GENE-090312-98	tet2	tet methylcytosine dioxygenase 2	ZFIN	protein_coding
chr1	26389153	26398361	-	LL0000022346	ZDB-GENE-040426-1857	ppa2	inorganic pyrophosphatase 2	ZFIN	protein_coding
chr1	26411496	26438319	+	LL0000001320	ZDB-GENE-090313-83	arhgef38	Rho guanine nucleotide exchange factor (GEF) 38	ZFIN	protein_coding
chr1	26438597	26444075	-	LL0000012799	ZDB-GENE-040625-178	ints12	integrator complex subunit 12	ZFIN	protein_coding
chr1	26443751	26466002	+	LL0000011038	ZDB-GENE-070112-1972	g3bp2	GTPase activating protein (SH3 domain) binding protein 2	ZFIN	protein_coding
chr1	26467053	26509316	+	LL0000031694	ZDB-GENE-040426-688	uso1	USO1 vesicle transport factor	ZFIN	protein_coding
chr1	26538446	26544268	-	LL0000025480	ZDB-GENE-121214-12	si:ch211-202n12.2	si:ch211-202n12.2	ZFIN	protein_coding
chr1	26551034	26554839	+	LL0000000841		AL954695.2		Clone-based (Ensembl) gene	lincRNA
chr1	26558711	26559133	-	LL0000017810		LOC110439708	uncharacterized LOC110439708,non-coding	GCF_000002035.6_GRCz11	lincRNA
chr1	26573435	26575260	-	LL0000000840		AL954695.1		Clone-based (Ensembl) gene	lincRNA
chr1	26577288	26584593	+	LL0000000842		AL954695.3		Clone-based (Ensembl) gene	lincRNA
chr1	26605065	26654317	+	LL0000006086	ZDB-GENE-030131-2258	coro2a	coronin, actin binding protein, 2A	ZFIN	protein_coding
chr1	26660356	26666083	-	LL0000001085	ZDB-GENE-030131-719	anp32b	acidic (leucine-rich) nuclear phosphoprotein 32 family, member B	ZFIN	protein_coding
chr1	26666233	26671210	+	LL0000012035	ZDB-GENE-121214-307	hemgn	hemogen	ZFIN	protein_coding
chr1	26670748	26676391	-	LL0000031146	ZDB-GENE-051023-15	trmo	tRNA methyltransferase O	ZFIN	protein_coding
chr1	26676758	26700456	+	LL0000027394	ZDB-GENE-030131-969	si:dkey-25o16.4	si:dkey-25o16.4	ZFIN	protein_coding
chr1	26701235	26703728	-	LL0000010584	ZDB-GENE-061116-1	foxe1	forkhead box E1	ZFIN	protein_coding
chr1	26739708	26782573	-	LL0000024639	ZDB-GENE-040121-3	sh3gl2a	SH3 domain containing GRB2 like 2a, endophilin A1	ZFIN	protein_coding
chr1	26821963	27014935	-	LL0000005938	ZDB-GENE-090313-409	cntln	centlein, centrosomal protein	ZFIN	protein_coding
chr1	27023687	27212459	+	LL0000001965	ZDB-GENE-030131-5784	bnc2	basonuclin 2	ZFIN	protein_coding
chr1	27262069	27294841	+	LL0000032230		XLOC_000322		Cufflinks; see BLAST hits		low confidence,XP_001341795.5,si:dkey-202l22.6,si:dkey-202l22.6, transcript variant X2	low confidence,XP_011524207.1,RTTN,rotatin isoform X10
chr1	27296698	27298595	+	LL0000032231		XLOC_000323		Cufflinks; see BLAST hits		low confidence,NP_001071220.1,zgc:123035,zgc:123035, transcript variant 2	no Blast hit
chr1	27442862	27443218	-	LL0000032348		XLOC_001282		Cufflinks; see BLAST hits		low confidence,NP_001232918.1,gig2l,grass carp reovirus (GCRV)-induced gene 2l	low confidence,NP_056277.2,NOL11,nucleolar protein 11 isoform 1
chr1	27468638	27494859	-	LL0000032349		XLOC_001283		Cufflinks; see BLAST hits		high confidence,XP_009289804.2,LOC103908810,uncharacterized LOC103908810	no Blast hit
chr1	27471397	27472841	-	LL0000032350		XLOC_001284		Cufflinks; see BLAST hits		low confidence,XP_021333689.1,zmp:0000000660,zmp:0000000660, transcript variant X3	low confidence,XP_024306066.1,PKD1,polycystin-1 isoform X1
chr1	27490673	27635179	-	LL0000017853		LOC110439825	uncharacterized LOC110439825	GCF_000002035.6_GRCz11	protein_coding
chr1	27495595	27495935	-	LL0000032351		XLOC_001285		Cufflinks; see BLAST hits		no Blast hit	no Blast hit
chr1	27496034	27496523	-	LL0000032352		XLOC_001286		Cufflinks; see BLAST hits		low confidence,XP_017206832.1,LOC103909784,uncharacterized LOC103909784, transcript variant X2	low confidence,NP_775112.1,CAPN3,calpain-3 isoform e
chr1	27530784	27542699	-	LL0000025019	ZDB-GENE-090312-72	si:ch211-127n13.2	si:ch211-127n13.2	ZFIN	protein_coding
chr1	27630697	27637054	+	LL0000032232		XLOC_000324		Cufflinks; see BLAST hits		high confidence,XP_021329428.1,LOC110439125,uncharacterized LOC110439125	no Blast hit
chr1	27637525	27638173	+	LL0000032233		XLOC_000325		Cufflinks; see BLAST hits		low confidence,XP_017206832.1,LOC103909784,uncharacterized LOC103909784, transcript variant X2	low confidence,NP_001092759.1,SH3RF3,E3 ubiquitin-protein ligase SH3RF3 precursor
chr1	27680867	27681705	-	LL0000032353		XLOC_001288		Cufflinks; see BLAST hits		low confidence,XP_009296319.1,si:dkey-217l24.1,si:dkey-217l24.1, transcript variant X2	no Blast hit
chr1	27692603	27693562	+	LL0000032234		XLOC_000326		Cufflinks; see BLAST hits		high confidence,XP_017206977.1,LOC103908925,uncharacterized LOC103908925	low confidence,XP_011535318.1,NYNRIN,protein NYNRIN isoform X1
chr1	27713349	27733179	+	LL0000027540	ZDB-GENE-090313-300	si:dkey-29d5.1	si:dkey-29d5.1	ZFIN	protein_coding
chr1	27738647	27743985	-	LL0000027541	ZDB-GENE-090312-83	si:dkey-29d5.2	si:dkey-29d5.2	ZFIN	protein_coding
chr1	27744178	27746285	-	LL0000014654		LOC101883046	uncharacterized LOC101883046	GCF_000002035.6_GRCz11	protein_coding
chr1	27808916	27861148	+	LL0000022789	ZDB-GENE-030131-9530	pspc1	paraspeckle component 1	ZFIN	protein_coding
chr1	27867706	27894817	+	LL0000009048	ZDB-GENE-061110-138	dnajb14	DnaJ heat shock protein family (Hsp40) member B14	ZFIN	protein_coding
chr1	27935957	27942203	+	LL0000017817		LOC110439743	uncharacterized LOC110439743	GCF_000002035.6_GRCz11	protein_coding
chr1	27944862	27945945	+	LL0000032235		XLOC_000331		Cufflinks; see BLAST hits		no Blast hit	no Blast hit
chr1	27977297	28020042	+	LL0000029651	ZDB-GENE-041114-56	sugt1	SGT1 homolog, MIS12 kinetochore complex assembly cochaperone	ZFIN	protein_coding
chr1	28031666	28047242	+	LL0000005663	ZDB-GENE-040808-40	chst10	carbohydrate sulfotransferase 10	ZFIN	protein_coding
chr1	28043287	28089692	-	LL0000029048	ZDB-GENE-040426-971	snapc3	small nuclear RNA activating complex, polypeptide 3	ZFIN	protein_coding
chr1	28089680	28195267	+	LL0000022729	ZDB-GENE-050522-104	psip1a	PC4 and SFRS1 interacting protein 1a	ZFIN	protein_coding
chr1	28248584	28249152	-	LL0000032354		XLOC_001292		Cufflinks; see BLAST hits		low confidence,XP_701235.5,hace1,HECT domain and ankyrin repeat containing E3 ubiquitin protein ligase 1	low confidence,NP_001337484.1,HACE1,E3 ubiquitin-protein ligase HACE1 isoform f
chr1	28262265	28263667	+	LL0000032236		XLOC_000335		Cufflinks; see BLAST hits		low confidence,NP_001265728.1,lama2,laminin, alpha 2	no Blast hit
chr1	28308616	28309012	-	LL0000003206		BX571828.2		Clone-based (Ensembl) gene	processed_transcript
chr1	28324971	28327724	-	LL0000032355		XLOC_001294		Cufflinks; see BLAST hits		no Blast hit	low confidence,NP_001155000.1,LRRD1,leucine-rich repeat and death domain-containing protein 1
chr1	28347117	28348126	+	LL0000032237		XLOC_000336		Cufflinks; see BLAST hits		low confidence,XP_003201490.2,si:dkey-217l24.1,si:dkey-217l24.1, transcript variant X1	low confidence,NP_001036148.2,SHPRH,E3 ubiquitin-protein ligase SHPRH isoform a
chr1	28348958	28365205	-	LL0000003205		BX571828.1		Clone-based (Ensembl) gene	processed_transcript
chr1	28388614	28389078	+	LL0000032238		XLOC_000337		Cufflinks; see BLAST hits		low confidence,XP_021334746.1,ttn.1,titin, tandem duplicate 1, transcript variant X1	no Blast hit
chr1	28389947	28473487	-	LL0000024854	ZDB-GENE-030131-8303	si:ch1073-440b2.1	si:ch1073-440b2.1	ZFIN	protein_coding
chr1	28528720	28529663	-	LL0000016541		LOC108182421	uncharacterized LOC108182421,non-coding	GCF_000002035.6_GRCz11	lincRNA
chr1	28546790	28562456	-	LL0000032356		XLOC_001298		Cufflinks; see BLAST hits		low confidence,XP_009301132.1,si:dkey-81n2.2,si:dkey-81n2.2, transcript variant X1	no Blast hit
chr1	28553918	28555282	-	LL0000017860		LOC110439834	uncharacterized LOC110439834,non-coding	GCF_000002035.6_GRCz11	lincRNA
chr1	28578831	28580210	-	LL0000032357		XLOC_001300		Cufflinks; see BLAST hits		no Blast hit	low confidence,XP_005246098.1,THEMIS2,protein THEMIS2 isoform X2
chr1	28580998	28588863	+	LL0000015509		LOC103908832	uncharacterized LOC103908832,non-coding	GCF_000002035.6_GRCz11	lincRNA
chr1	28585235	28585950	+	LL0000032239		XLOC_000339		Cufflinks; see BLAST hits		moderate confidence,XP_017210988.1,LOC101886882,uncharacterized LOC101886882, transcript variant X1	moderate confidence,XP_016869645.1,LOC105379356,uncharacterized protein LOC105379356 isoform X2
chr1	28588964	28589932	+	LL0000016795		LOC108190024	uncharacterized LOC108190024,non-coding	GCF_000002035.6_GRCz11	lincRNA
chr1	28594809	28607353	-	LL0000010562		FO907124.1	uncharacterized LOC108185504 [Source:NCBI gene;Acc:108185504]	Clone-based (Ensembl) gene	protein_coding
chr1	28618610	28620307	-	LL0000032358		XLOC_001302		Cufflinks; see BLAST hits		no Blast hit	no Blast hit
chr1	28623156	28629574	-	LL0000009387	ZDB-GENE-980526-16	ednrba	endothelin receptor Ba	ZFIN	protein_coding
chr1	28634427	28635341	+	LL0000032240		XLOC_000340		Cufflinks; see BLAST hits		low confidence,NP_001070987.1,plekhh1,pleckstrin homology domain containing, family H (with MyTH4 domain) member 1	low confidence,XP_016866818.1,VWA7,von Willebrand factor A domain-containing protein 7 isoform X2
chr1	28693620	28694990	+	LL0000032241		XLOC_000341		Cufflinks; see BLAST hits		moderate confidence,XP_005165376.1,antxr2a,anthrax toxin receptor 2a, transcript variant X1	no Blast hit
chr1	28696942	28700674	+	LL0000032242		XLOC_000342		Cufflinks; see BLAST hits		moderate confidence,XP_021331692.1,thy1,Thy-1 cell surface antigen, transcript variant X1	low confidence,NP_001273466.1,C2orf49,ashwin isoform 2
chr1	28708241	28709951	-	LL0000003560		BX901881.1		Clone-based (Ensembl) gene	processed_pseudogene
chr1	28712088	28713333	+	LL0000032243		XLOC_000343		Cufflinks; see BLAST hits		low confidence,XP_003200160.3,LOC100332535,uncharacterized LOC100332535	low confidence,NP_596867.1,ITGB1,integrin beta-1 isoform 1A precursor
chr1	28714461	28716223	+	LL0000032244		XLOC_000344		Cufflinks; see BLAST hits		no Blast hit	no Blast hit
chr1	28716331	28717017	+	LL0000032245		XLOC_000345		Cufflinks; see BLAST hits		low confidence,NP_775383.1,lamb4,laminin, beta 4	low confidence,NP_055632.2,TRIL,TLR4 interactor with leucine rich repeats precursor
chr1	28722896	28831871	-	LL0000011352		GK3P	zgc:172295 [Source:ZFIN;Acc:ZDB-GENE-080204-72]	HGNC symbol	protein_coding
chr1	28832671	28861226	-	LL0000030330	ZDB-GENE-050417-369	timmdc1	translocase of inner mitochondrial membrane domain containing 1	ZFIN	protein_coding
chr1	28862857	28864667	-	LL0000032359		XLOC_001307		Cufflinks; see BLAST hits		low confidence,XP_001923018.1,nup188,nucleoporin 188	no Blast hit
chr1	28867573	28869648	-	LL0000032360		XLOC_001308		Cufflinks; see BLAST hits		no Blast hit	no Blast hit
chr1	28874375	28890028	-	LL0000022243	ZDB-GENE-051120-24	poglut1	protein O-glucosyltransferase 1	ZFIN	protein_coding
chr1	28898945	28950366	-	LL0000022957	ZDB-GENE-021031-3	pwp2h	PWP2 small subunit processome component	ZFIN	protein_coding
chr1	28903770	28904635	+	LL0000008028		CU469541.1		Clone-based (Ensembl) gene	lincRNA
chr1	28959723	29045485	-	LL0000011573	ZDB-GENE-030710-9	gpm6ba	glycoprotein M6Ba	ZFIN	protein_coding
chr1	29054808	29056161	-	LL0000032361		XLOC_001312		Cufflinks; see BLAST hits		low confidence,XP_021327561.1,chd3,chromodomain helicase DNA binding protein 3, transcript variant X5	low confidence,NP_659476.2,CENPBD1,CENPB DNA-binding domain-containing protein 1
chr1	29058268	29061327	-	LL0000011260	ZDB-GENE-041114-189	gemin8	gem (nuclear organelle) associated protein 8	ZFIN	protein_coding
chr1	29068645	29093562	+	LL0000004992	ZDB-GENE-050417-367	cbsa	cystathionine beta-synthase a	ZFIN	protein_coding
chr1	29096881	29100923	+	LL0000007356	ZDB-GENE-020508-1	cryaa	crystallin, alpha A	ZFIN	protein_coding
chr1	29102011	29139183	-	LL0000012361	ZDB-GENE-030131-1458	hsf2bp	heat shock transcription factor 2 binding protein	ZFIN	protein_coding
chr1	29140884	29164911	+	LL0000001015	ZDB-GENE-040426-700	ankrd10a	ankyrin repeat domain 10a	ZFIN	protein_coding
chr1	29167321	29168495	-	LL0000003627		BX908780.3		Clone-based (Ensembl) gene	lincRNA
chr1	29174195	29180648	+	LL0000003629		BX908780.5		Clone-based (Ensembl) gene	antisense
chr1	29174504	29185227	-	LL0000003625		BX908780.1		Clone-based (Ensembl) gene	processed_transcript
chr1	29178117	29179934	+	LL0000025438	ZDB-GENE-090312-4	si:ch211-198k9.6	si:ch211-198k9.6	ZFIN	protein_coding
chr1	29183954	29205548	+	LL0000004915	ZDB-GENE-030131-5564	cars2	cysteinyl-tRNA synthetase 2, mitochondrial	ZFIN	protein_coding
chr1	29211394	29229496	+	LL0000012878	ZDB-GENE-040426-975	irs2a	insulin receptor substrate 2a	ZFIN	protein_coding
chr1	29267841	29272763	+	LL0000013665	ZDB-GENE-070820-10	lig4	ligase IV, DNA, ATP-dependent	ZFIN	protein_coding
chr1	29311527	29312559	+	LL0000003626		BX908780.2		Clone-based (Ensembl) gene	sense_intronic
chr1	29323374	29326948	-	LL0000003628		BX908780.4		Clone-based (Ensembl) gene	antisense
chr1	29433427	29434775	+	LL0000032246		XLOC_000357		Cufflinks; see BLAST hits		moderate confidence,XP_021324159.1,LOC110438160,uncharacterized LOC110438160	low confidence,XP_016862710.1,NEK11,serine/threonine-protein kinase Nek11 isoform X6
chr1	29444452	29445719	+	LL0000007578		CT573186.1		Clone-based (Ensembl) gene	lincRNA
chr1	29507647	29508473	+	LL0000006897		CR774189.1		Clone-based (Ensembl) gene	lincRNA
chr1	29515160	29519002	+	LL0000027203	ZDB-GENE-090312-27	si:dkey-228l14.1	si:dkey-228l14.1	ZFIN	protein_coding
chr1	29526075	29528720	-	LL0000032362		XLOC_001318		Cufflinks; see BLAST hits		moderate confidence,XP_005174219.2,wu:fb74b10,wu:fb74b10	no Blast hit
chr1	29607266	29653475	-	LL0000027033	ZDB-GENE-060503-482	si:dkey-1h24.2	si:dkey-1h24.2	ZFIN	protein_coding
chr1	29653947	29658721	-	LL0000027034	ZDB-GENE-100922-103	si:dkey-1h24.6	si:dkey-1h24.6	ZFIN	protein_coding
chr1	29664313	29743640	+	LL0000023198	ZDB-GENE-090311-54	raph1b	Ras association (RalGDS/AF-6) and pleckstrin homology domains 1b	ZFIN	protein_coding
chr1	29743442	29747702	-	LL0000029311	ZDB-GENE-090313-223	spp2	secreted phosphoprotein 2	ZFIN	protein_coding
chr1	29750937	29761086	-	LL0000000889	ZDB-GENE-030131-7282	alg11	ALG11 alpha-1,2-mannosyltransferase	ZFIN	protein_coding
chr1	29759678	29764060	+	LL0000006131	ZDB-GENE-050522-259	cpb2	carboxypeptidase B2 (plasma)	ZFIN	protein_coding
chr1	29766715	29797984	+	LL0000038345	ZDB-GENE-040426-1619	zc3h13	zinc finger CCCH-type containing 13	ZFIN	protein_coding
chr1	29798140	29824375	+	LL0000030401	ZDB-GENE-030131-6302	tm9sf2	transmembrane 9 superfamily member 2	ZFIN	protein_coding
chr1	29831759	29860895	+	LL0000039304	ZDB-GENE-030219-92	zic2b	zic family member 2 (odd-paired homolog, Drosophila) b	ZFIN	protein_coding
chr1	29862074	29953746	+	LL0000021353	ZDB-GENE-040718-246	pcca	propionyl-CoA carboxylase subunit alpha	ZFIN	protein_coding
chr1	29954532	30039420	-	LL0000018666		MARCH4 (1 of many)	zgc:153256 [Source:ZFIN;Acc:ZDB-GENE-060825-323]	HGNC symbol	protein_coding
chr1	30074619	30081146	+	LL0000015400		LOC101886839	uncharacterized LOC101886839,non-coding	GCF_000002035.6_GRCz11	lincRNA
chr1	30074619	30081146	+	LL0000032247		XLOC_000367		Cufflinks; see BLAST hits		high confidence,XP_021336451.1,LOC110440176,uncharacterized LOC110440176, transcript variant X2	no Blast hit
chr1	30083566	30310689	+	LL0000031908	ZDB-GENE-060503-348	vps8	VPS8 subunit of CORVET complex	ZFIN	protein_coding
chr1	30165953	30166065	+	LL0000019315	ZDB-MIRNAG-090929-319	mir740	microRNA 740	ZFIN	miRNA
chr1	30333202	30334829	-	LL0000006402		CR382370.1		Clone-based (Ensembl) gene	lincRNA
chr1	30343714	30366904	-	LL0000027221	ZDB-GENE-060503-443	si:dkey-22o12.2	si:dkey-22o12.2	ZFIN	protein_coding
chr1	30374798	30377343	+	LL0000032248		XLOC_000371		Cufflinks; see BLAST hits		high confidence,XP_009302985.2,LOC103911649,uncharacterized LOC103911649	low confidence,XP_024302798.1,LOC112267992,uncharacterized protein LOC112267992
chr1	30422143	30438140	+	LL0000030615	ZDB-GENE-040426-2050	tmem41ab	transmembrane protein 41ab	ZFIN	protein_coding
chr1	30439422	30441060	-	LL0000006403		CR382370.2		Clone-based (Ensembl) gene	lincRNA
chr1	30443193	30510957	-	LL0000012534	ZDB-GENE-060503-536	igf2bp2b	insulin-like growth factor 2 mRNA binding protein 2b	ZFIN	protein_coding
chr1	30539846	30568225	-	LL0000031447	ZDB-GENE-070112-2122	ubac2	UBA domain containing 2	ZFIN	protein_coding
chr1	30551777	30555584	+	LL0000011615	ZDB-GENE-081031-74	gpr183b	G protein-coupled receptor 183b	ZFIN	protein_coding
chr1	30584904	30689004	-	LL0000008657	ZDB-GENE-020402-5	dachc	dachshund c	ZFIN	protein_coding
chr1	30718246	30723258	-	LL0000019925		MZT1	si:dkey-15d12.2 [Source:ZFIN;Acc:ZDB-GENE-090313-33]	HGNC symbol	protein_coding
chr1	30722409	30735478	+	LL0000001983	ZDB-GENE-041114-165	bora	bora aurora kinase A activator	ZFIN	protein_coding
chr1	30736449	30762264	-	LL0000008951	ZDB-GENE-080213-3	dis3	DIS3 exosome endoribonuclease and 3'-5' exoribonuclease	ZFIN	protein_coding
chr1	30829997	30831196	-	LL0000006623		CR407598.1		Clone-based (Ensembl) gene	lincRNA
chr1	30853969	30857925	+	LL0000003081		BX548015.2		Clone-based (Ensembl) gene	lincRNA
chr1	30919336	30923141	-	LL0000003080		BX548015.1		Clone-based (Ensembl) gene	lincRNA
chr1	30946231	30974165	+	LL0000018888	ZDB-GENE-050522-71	metap1d	methionyl aminopeptidase type 1D (mitochondrial)	ZFIN	protein_coding
chr1	30977936	30979707	-	LL0000008995	ZDB-GENE-980526-18	dlx2b	distal-less homeobox 2b	ZFIN	protein_coding
chr1	31019153	31064714	+	LL0000012929	ZDB-GENE-050320-5	itga6b	integrin, alpha 6b	ZFIN	protein_coding
chr1	31071707	31105450	-	LL0000022454	ZDB-GENE-090312-99	ppp1r9alb	protein phosphatase 1 regulatory subunit 9A-like B	ZFIN	protein_coding
chr1	31110817	31130222	+	LL0000009393	ZDB-GENE-050417-327	eef1a1b	eukaryotic translation elongation factor 1 alpha 1b	ZFIN	protein_coding
chr1	31134942	31350148	-	LL0000013200	ZDB-GENE-090312-178	kcnq5b	potassium voltage-gated channel, KQT-like subfamily, member 5b	ZFIN	protein_coding
chr1	31141317	31144527	+	LL0000002487		BX284697.1		Clone-based (Ensembl) gene	antisense
chr1	31288536	31296246	-	LL0000002488		BX284697.2		Clone-based (Ensembl) gene	sense_intronic
chr1	31356725	31363621	+	LL0000032249		XLOC_000380		Cufflinks; see BLAST hits		high confidence,XP_021333505.1,LOC108179166,uncharacterized LOC108179166, transcript variant X2	low confidence,XP_011533927.1,ZNF292,zinc finger protein 292 isoform X2
chr1	31358505	31363621	+	LL0000015520		LOC103908890	uncharacterized LOC103908890	GCF_000002035.6_GRCz11	protein_coding
chr1	31370345	31506400	-	LL0000023691	ZDB-GENE-101223-4	rims1b	regulating synaptic membrane exocytosis 1b	ZFIN	protein_coding
chr1	31508739	31516112	-	LL0000005433	ZDB-GENE-090313-204	cenpk	centromere protein K	ZFIN	protein_coding
chr1	31519239	31520972	+	LL0000007584		CT573247.1		Clone-based (Ensembl) gene	lincRNA
chr1	31521890	31525015	+	LL0000017811		LOC110439710	uncharacterized LOC110439710,non-coding	GCF_000002035.6_GRCz11	lincRNA
chr1	31531990	31534089	-	LL0000013555	ZDB-GENE-050309-27	lbx1b	ladybird homeobox 1b	ZFIN	protein_coding
chr1	31573204	31598417	+	LL0000028667	ZDB-GENE-050508-1	slc2a15b	solute carrier family 2 member 15b	ZFIN	protein_coding
chr1	31600749	31602185	+	LL0000032250		XLOC_000384		Cufflinks; see BLAST hits		low confidence,XP_021322010.1,p4ha3,prolyl 4-hydroxylase, alpha polypeptide III, transcript variant X5	no Blast hit
chr1	31638274	31669901	+	LL0000010309	ZDB-GENE-010122-1	fgf8b	fibroblast growth factor 8 b	ZFIN	protein_coding
chr1	31654198	31657854	-	LL0000009151	ZDB-GENE-060825-166	dpcd	deleted in primary ciliary dyskinesia homolog (mouse)	ZFIN	protein_coding
chr1	31657842	31672343	+	LL0000022263	ZDB-GENE-040426-2712	poll	polymerase (DNA directed), lambda	ZFIN	protein_coding
chr1	31674154	31701798	+	LL0000031979	ZDB-GENE-050522-112	wbp1lb	WW domain binding protein 1-like b	ZFIN	protein_coding
chr1	31701978	31703268	+	LL0000032251		XLOC_000388		Cufflinks; see BLAST hits		no Blast hit	no Blast hit
chr1	31701979	31703265	-	LL0000032363		XLOC_001343		Cufflinks; see BLAST hits		no Blast hit	no Blast hit
chr1	31706668	31722875	+	LL0000001437	ZDB-GENE-060312-15	as3mt	arsenite methyltransferase	ZFIN	protein_coding
chr1	31724623	31799359	+	LL0000005905	ZDB-GENE-090311-26	cnnm2b	cyclin and CBS domain divalent metal cation transport mediator 2b	ZFIN	protein_coding
chr1	31806617	31856777	-	LL0000020672	ZDB-GENE-061013-522	nt5c2b	5'-nucleotidase, cytosolic IIb	ZFIN	protein_coding
chr1	31864230	31870690	+	LL0000012741	ZDB-GENE-990415-83	inab	internexin neuronal intermediate filament protein, alpha b	ZFIN	protein_coding
chr1	31942961	31979510	+	LL0000001082	ZDB-GENE-000201-9	anos1a	anosmin 1a	ZFIN	protein_coding
chr1	32010268	32015319	+	LL0000003571		BX901898.2		Clone-based (Ensembl) gene	protein_coding
chr1	32017437	32018115	+	LL0000003570		BX901898.1		Clone-based (Ensembl) gene	lincRNA
chr1	32051379	32078956	+	LL0000029601	ZDB-GENE-030717-5	sts	steroid sulfatase (microsomal), isozyme S	ZFIN	protein_coding
chr1	32079563	32081409	+	LL0000032252		XLOC_000396		Cufflinks; see BLAST hits		low confidence,NP_001139404.1,acsl3b,acyl-CoA synthetase long-chain family member 3b	no Blast hit
chr1	32094406	32111924	-	LL0000022224	ZDB-GENE-070410-74	pnpla4	patatin-like phospholipase domain containing 4	ZFIN	protein_coding
chr1	32316335	32318911	-	LL0000007181		CR925879.1		Clone-based (Ensembl) gene	processed_transcript
chr1	32341484	32385665	+	LL0000022929	ZDB-GENE-050522-36	pudp	pseudouridine 5'-phosphatase	ZFIN	protein_coding
chr1	32473637	32474791	+	LL0000032253		XLOC_000398		Cufflinks; see BLAST hits		low confidence,XP_021331061.1,LOC110439405,uncharacterized LOC110439405	no Blast hit
chr1	32521469	32693950	+	LL0000020394	ZDB-GENE-100309-2	nlgn4xa	neuroligin 4 X-linked a	ZFIN	protein_coding
chr1	32789508	32794249	+	LL0000039038	ZDB-GENE-080206-2	zgc:174320	zgc:174320	ZFIN	protein_coding
chr1	32937203	32944063	+	LL0000017930		LOC110439944	uncharacterized LOC110439944	GCF_000002035.6_GRCz11	protein_coding
chr1	32953142	32953641	-	LL0000032364		XLOC_001348		Cufflinks; see BLAST hits		no Blast hit	no Blast hit
chr1	33193995	33195424	-	LL0000032365		XLOC_001350		Cufflinks; see BLAST hits		low confidence,XP_021326442.1,LOC101887189,uncharacterized LOC101887189	no Blast hit
chr1	33215241	33216718	+	LL0000002563		BX322647.1		Clone-based (Ensembl) gene	processed_transcript
chr1	33217197	33294148	+	LL0000022610	ZDB-GENE-090313-408	prkx	protein kinase X-linked	ZFIN	protein_coding
chr1	33322011	33334732	+	LL0000019785	ZDB-GENE-090312-22	mxra5a	matrix-remodelling associated 5a	ZFIN	protein_coding
chr1	33336923	33353778	-	LL0000011886	ZDB-GENE-080723-74	gyg2	glycogenin 2	ZFIN	protein_coding
chr1	33353174	33380340	-	LL0000005261	ZDB-GENE-061103-391	cd99	CD99 molecule	ZFIN	protein_coding
chr1	33383644	33487375	+	LL0000008898	ZDB-GENE-060620-2	dhrsx	dehydrogenase/reductase (SDR family) X-linked	ZFIN	protein_coding
chr1	33543431	33544837	-	LL0000032366		XLOC_001352		Cufflinks; see BLAST hits		moderate confidence,XP_021335606.1,LOC101886098,Fc receptor-like protein 5, transcript variant X5	no Blast hit
chr1	33547532	33557915	-	LL0000007281	ZDB-GENE-040426-750	creb1a	cAMP responsive element binding protein 1a	ZFIN	protein_coding
chr1	33558511	33569245	+	LL0000005606	ZDB-GENE-040426-2539	chmp2bb	charged multivesicular body protein 2Bb	ZFIN	protein_coding
chr1	33599165	33636309	+	LL0000012407	ZDB-GENE-090312-140	htr1fb	5-hydroxytryptamine (serotonin) receptor 1Fb	ZFIN	protein_coding
chr1	33645044	33666927	-	LL0000005784	ZDB-GENE-010328-7	cldng	claudin g	ZFIN	protein_coding
chr1	33647682	33663705	+	LL0000039643	ZDB-GENE-030131-1423	znf654	zinc finger protein 654	ZFIN	protein_coding
chr1	33668236	33694795	+	LL0000001348	ZDB-GENE-021217-3	arl13b	ADP-ribosylation factor-like 13b	ZFIN	protein_coding
chr1	33697067	33723588	+	LL0000020663	ZDB-GENE-050706-95	nsun3	NOP2/Sun RNA methyltransferase 3	ZFIN	protein_coding
chr1	33723375	33723666	-	LL0000032367		XLOC_001355		Cufflinks; see BLAST hits		no Blast hit	no Blast hit
chr1	33856445	33857352	+	LL0000015385		LOC101886777	predicted GPI-anchored protein 23	GCF_000002035.6_GRCz11	protein_coding
chr1	33880071	33880621	+	LL0000032254		XLOC_000415		Cufflinks; see BLAST hits		no Blast hit	no Blast hit
chr1	33969007	34201195	+	LL0000009710	ZDB-GENE-090311-43	epha6	eph receptor A6	ZFIN	protein_coding
chr1	34122880	34122972	+	LL0000019310	ZDB-MIRNAG-090929-314	mir734	microRNA 734	ZFIN	miRNA
chr1	34203817	34234178	+	LL0000001366	ZDB-GENE-041219-2	arl6	ADP-ribosylation factor-like 6	ZFIN	protein_coding
chr1	34242607	34261993	+	LL0000028822	ZDB-GENE-090313-273	slc5a7a	solute carrier family 5 member 7a	ZFIN	protein_coding
chr1	34295925	34297403	+	LL0000013211	ZDB-GENE-060117-4	kctd12.2	potassium channel tetramerisation domain containing 12.2	ZFIN	protein_coding
chr1	34321574	34335752	-	LL0000027356	ZDB-GENE-090313-274	si:dkey-24h22.5	si:dkey-24h22.5	ZFIN	protein_coding
chr1	34365845	34450784	-	LL0000013740	ZDB-GENE-060825-242	lmo7b	LIM domain 7b	ZFIN	protein_coding
chr1	34496787	34558804	+	LL0000013356	ZDB-GENE-030131-9188	klf12a	Kruppel-like factor 12a	ZFIN	protein_coding
chr1	34593490	34612812	-	LL0000013365	ZDB-GENE-090312-167	klf5a	Kruppel-like factor 5a	ZFIN	protein_coding
chr1	34612321	34685329	-	LL0000021757	ZDB-GENE-040801-94	pibf1	progesterone immunomodulatory binding factor 1	ZFIN	protein_coding
chr1	34685405	34694379	+	LL0000011533	ZDB-GENE-040801-212	gpalpp1	GPALPP motifs containing 1	ZFIN	protein_coding
chr1	34695373	34706903	+	LL0000011835	ZDB-GENE-040625-131	gtf2f2a	general transcription factor IIF, polypeptide 2a	ZFIN	protein_coding
chr1	34696503	34727517	+	LL0000006228		CR339054.2		Clone-based (Ensembl) gene	protein_coding
chr1	34707932	34713868	-	LL0000030899	ZDB-GENE-990603-10	tpt1	tumor protein, translationally-controlled 1	ZFIN	protein_coding
chr1	34708497	34711271	-	LL0000023485		RF00322			snoRNA
chr1	34711932	34712583	-	LL0000023457		RF00151			snoRNA
chr1	34728593	34748322	-	LL0000006227		CR339054.1		Clone-based (Ensembl) gene	processed_transcript
chr1	34728593	34730050	-	LL0000032368		XLOC_001364		Cufflinks; see BLAST hits		high confidence,XP_021323770.1,si:ch211-209f23.6,si:ch211-209f23.6, transcript variant X3	no Blast hit
chr1	34748695	34750169	-	LL0000026780	ZDB-GENE-110411-250	si:dkey-151m22.8	si:dkey-151m22.8	ZFIN	protein_coding
chr1	34757943	34759177	-	LL0000017864		LOC110439843	uncharacterized LOC110439843,non-coding	GCF_000002035.6_GRCz11	lincRNA
chr1	34763486	34807424	+	LL0000038974	ZDB-GENE-080208-1	zgc:172122	zgc:172122	ZFIN	protein_coding
chr1	34954697	35113974	-	LL0000003549		BX897691.1	B- and T-lymphocyte attenuator-like [Source:NCBI gene;Acc:103910066]	Clone-based (Ensembl) gene	protein_coding
chr1	35121888	35128314	+	LL0000032255		XLOC_000428		Cufflinks; see BLAST hits		high confidence,XP_009300605.1,LOC103911210,uncharacterized LOC103911210	low confidence,NP_976048.1,ZCCHC13,zinc finger CCHC domain-containing protein 13
chr1	35128365	35129564	+	LL0000016803		LOC108190061	uncharacterized LOC108190061,non-coding	GCF_000002035.6_GRCz11	lincRNA
chr1	35144071	35144804	-	LL0000032369		XLOC_001368		Cufflinks; see BLAST hits		no Blast hit	no Blast hit
chr1	35170387	35172813	-	LL0000017865		LOC110439844	uncharacterized LOC110439844	GCF_000002035.6_GRCz11	protein_coding
chr1	35180509	35182364	-	LL0000032370		XLOC_001370		Cufflinks; see BLAST hits		low confidence,NP_001229967.1,creb3l1,cAMP responsive element binding protein 3-like 1	no Blast hit
chr1	35194454	35234700	+	LL0000024246	ZDB-GENE-080303-11	sc:d189	sc:d189	ZFIN	protein_coding
chr1	35309687	35310141	-	LL0000032371		XLOC_001371		Cufflinks; see BLAST hits		no Blast hit	no Blast hit
chr1	35317354	35318209	-	LL0000006911		CR786582.1		Clone-based (Ensembl) gene	processed_transcript
chr1	35331983	35335416	-	LL0000006912		CR786582.2	B- and T-lymphocyte attenuator-like [Source:NCBI gene;Acc:101883801]	Clone-based (Ensembl) gene	processed_transcript
chr1	35386396	35387492	-	LL0000032372		XLOC_001374		Cufflinks; see BLAST hits		high confidence,XP_021333404.1,nitr3r.1l,novel immune-type receptor 3, related 1-like, transcript variant X1	low confidence,NP_000441.2,SELE,E-selectin precursor
chr1	35389383	35392972	+	LL0000032256		XLOC_000431		Cufflinks; see BLAST hits		high confidence,XP_021327275.1,LOC103908724,uncharacterized LOC103908724	no Blast hit
chr1	35398378	35401308	-	LL0000032373		XLOC_001375		Cufflinks; see BLAST hits		high confidence,XP_021333404.1,nitr3r.1l,novel immune-type receptor 3, related 1-like, transcript variant X1	low confidence,NP_001182570.1,PLA2R1,secretory phospholipase A2 receptor isoform 3 precursor
chr1	35467985	35468982	-	LL0000015376		LOC101886741	uncharacterized LOC101886741	GCF_000002035.6_GRCz11	protein_coding
chr1	35471954	35491005	+	LL0000031721	ZDB-GENE-101007-2	usp38	ubiquitin specific peptidase 38	ZFIN	protein_coding
chr1	35494696	35609663	+	LL0000011047	ZDB-GENE-040426-2674	gab1	GRB2-associated binding protein 1	ZFIN	protein_coding
chr1	35610653	35653896	-	LL0000010854	ZDB-GENE-030131-9788	frem3	Fras1 related extracellular matrix 3	ZFIN	protein_coding
chr1	35662474	35695724	-	LL0000027478	ZDB-GENE-090313-296	si:dkey-27h10.2	si:dkey-27h10.2	ZFIN	protein_coding
chr1	35790035	35835863	+	LL0000012088	ZDB-GENE-030131-4827	hhip	hedgehog interacting protein	ZFIN	protein_coding
chr1	35862550	35875339	+	LL0000025378	ZDB-GENE-090313-65	si:ch211-194g2.4	si:ch211-194g2.4	ZFIN	protein_coding
chr1	35896488	35935495	-	LL0000028930	ZDB-GENE-991119-8	smad1	SMAD family member 1	ZFIN	protein_coding
chr1	35941573	35943131	+	LL0000015429		LOC101886967	uncharacterized LOC101886967,non-coding	GCF_000002035.6_GRCz11	lincRNA
chr1	35949269	35954313	+	LL0000002470		BX276105.1	TRANSCRIPTION ELONGATION FACTOR A N TERMINAL AND CENTRAL DOMAIN CONTAINING TFIIS CENTRAL DOMAIN CONTAINING 1	Clone-based (Ensembl) gene	protein_coding
chr1	35956435	35970259	+	LL0000019385	ZDB-GENE-070928-15	mmaa	metabolism of cobalamin associated A	ZFIN	protein_coding
chr1	35978812	35983777	+	LL0000032257		XLOC_000439		Cufflinks; see BLAST hits		moderate confidence,NP_001106978.1,il23r,interleukin 23 receptor	no Blast hit
chr1	35985813	36002774	+	LL0000038699	ZDB-GENE-061013-448	zgc:152968	zgc:152968	ZFIN	protein_coding
chr1	36009440	36152131	-	LL0000039664	ZDB-GENE-080728-3	znf827	zinc finger protein 827	ZFIN	protein_coding
chr1	36188184	36218748	-	LL0000002709		BX324156.1		Clone-based (Ensembl) gene	protein_coding
chr1	36194761	36204000	+	LL0000018436	ZDB-GENE-040625-50	lsm6	LSM6 homolog, U6 small nuclear RNA and mRNA degradation associated	ZFIN	protein_coding
chr1	36348689	36351489	-	LL0000014429		LOC100538006	uncharacterized LOC100538006,non-coding	GCF_000002035.6_GRCz11	lincRNA
chr1	36436556	36443825	+	LL0000022339	ZDB-GENE-040401-1	pou4f2	POU class 4 homeobox 2	ZFIN	protein_coding
chr1	36443913	36444669	+	LL0000032258		XLOC_000444		Cufflinks; see BLAST hits		no Blast hit	no Blast hit
chr1	36447498	36472785	-	LL0000025253	ZDB-GENE-090313-55	si:ch211-163g19.2	si:ch211-163g19.2	ZFIN	protein_coding
chr1	36612660	36703556	+	LL0000009385	ZDB-GENE-010906-2	ednraa	endothelin receptor type Aa	ZFIN	protein_coding
chr1	36722070	36746569	+	LL0000030536	ZDB-GENE-090312-89	tmem184c	transmembrane protein 184C	ZFIN	protein_coding
chr1	36746077	36772147	-	LL0000022629	ZDB-GENE-080728-4	prmt9	protein arginine methyltransferase 9	ZFIN	protein_coding
chr1	36771954	36913091	+	LL0000001259	ZDB-GENE-060512-221	arhgap10	Rho GTPase activating protein 10	ZFIN	protein_coding
chr1	36927081	37087989	-	LL0000020589	ZDB-GENE-060531-23	nr3c2	nuclear receptor subfamily 3, group C, member 2	ZFIN	protein_coding
chr1	36928494	36931978	-	LL0000032374		XLOC_001388		Cufflinks; see BLAST hits		no Blast hit	low confidence,XP_005249299.1,MRS2,magnesium transporter MRS2 homolog, mitochondrial isoform X1
chr1	37183375	37187050	+	LL0000032259		XLOC_000449		Cufflinks; see BLAST hits		high confidence,XP_021324313.1,ftr06,finTRIM family, member 6, transcript variant X1	high confidence,NP_001128360.1,RTL1,retrotransposon-like protein 1
chr1	37195465	37310490	+	LL0000008718	ZDB-GENE-050420-170	dclk2a	doublecortin-like kinase 2a	ZFIN	protein_coding
chr1	37312580	37362246	+	LL0000010037	ZDB-GENE-080917-25	fam193a	family with sequence similarity 193 member A	ZFIN	protein_coding
chr1	37372189	37377841	-	LL0000030748	ZDB-GENE-120913-2	tnip2	TNFAIP3 interacting protein 2	ZFIN	protein_coding
chr1	37379063	37383741	-	LL0000024315	ZDB-GENE-090424-1	scpp1	secretory calcium-binding phosphoprotein 1	ZFIN	protein_coding
chr1	37391101	37419873	+	LL0000029234	ZDB-GENE-060130-6	sparcl1	SPARC-like 1	ZFIN	protein_coding
chr1	37540423	37540826	-	LL0000032375		XLOC_001392		Cufflinks; see BLAST hits		low confidence,XP_009303477.1,apbb1,amyloid beta (A4) precursor protein-binding, family B, member 1 (Fe65), transcript variant X3	no Blast hit
chr1	37570157	37570598	+	LL0000016846		LOC108190667	uncharacterized LOC108190667,non-coding	GCF_000002035.6_GRCz11	lincRNA
chr1	37625440	37626448	+	LL0000032260		XLOC_000454		Cufflinks; see BLAST hits		low confidence,XP_009295341.1,tor1l2,torsin family 1 like 2, transcript variant X2	no Blast hit
chr1	37752171	38132612	+	LL0000011127		GALNTL6	si:ch211-15e22.3 [Source:ZFIN;Acc:ZDB-GENE-090312-115]	HGNC symbol	protein_coding
chr1	37833350	37834392	+	LL0000014760		LOC101883643	uncharacterized LOC101883643,non-coding	GCF_000002035.6_GRCz11	lincRNA
chr1	38122945	38182155	-	LL0000012170	ZDB-GENE-051120-126	hmgb2a	high mobility group box 2a	ZFIN	protein_coding
chr1	38142354	38170906	+	LL0000011121	ZDB-GENE-050522-284	galnt7	UDP-N-acetyl-alpha-D-galactosamine: polypeptide N-acetylgalactosaminyltransferase 7	ZFIN	protein_coding
chr1	38151262	38170575	+	LL0000007936		CU462871.1		Clone-based (Ensembl) gene	protein_coding
chr1	38193147	38195012	-	LL0000011925	ZDB-GENE-000511-1	hand2	heart and neural crest derivatives expressed 2	ZFIN	protein_coding
chr1	38263693	38324035	+	LL0000002107		BX000460.1		Clone-based (Ensembl) gene	lincRNA
chr1	38344530	38361509	-	LL0000010227	ZDB-GENE-060421-7091	fbxo8	F-box protein 8	ZFIN	protein_coding
chr1	38362309	38374799	+	LL0000005462	ZDB-GENE-060929-392	cep44	centrosomal protein 44	ZFIN	protein_coding
chr1	38389697	38538284	-	LL0000011389	ZDB-GENE-020402-1	glra3	glycine receptor, alpha 3	ZFIN	protein_coding
chr1	38398694	38415164	-	LL0000012299	ZDB-GENE-080728-2	hpgd	15-hydroxyprostaglandin dehydrogenase	ZFIN	protein_coding
chr1	38649141	38756946	-	LL0000011572	ZDB-GENE-030710-8	gpm6ab	glycoprotein M6Ab	ZFIN	protein_coding
chr1	38665754	38753029	+	LL0000003349		BX649481.1		Clone-based (Ensembl) gene	processed_transcript
chr1	38758261	38804067	+	LL0000031994	ZDB-GENE-090313-131	wdr17	WD repeat domain 17	ZFIN	protein_coding
chr1	38804956	38816685	-	LL0000001465	ZDB-GENE-050417-271	asb5b	ankyrin repeat and SOCS box containing 5b	ZFIN	protein_coding
chr1	38818268	38822167	+	LL0000029258	ZDB-GENE-040426-2206	spcs3	signal peptidase complex subunit 3	ZFIN	protein_coding
chr1	38849314	38908197	-	LL0000031836	ZDB-GENE-040303-4	vegfc	vascular endothelial growth factor c	ZFIN	protein_coding
chr1	38858399	38859425	+	LL0000008313		CU915762.1	UNCHARACTERIZED	Clone-based (Ensembl) gene	protein_coding
chr1	38928636	39022832	+	LL0000003833		BX957306.1		Clone-based (Ensembl) gene	lincRNA
chr1	39373802	39373911	-	LL0000019212	ZDB-MIRNAG-091026-4	mir2197	microRNA 2197	ZFIN	miRNA
chr1	39383996	39780180	+	LL0000030152	ZDB-GENE-990714-19	tenm3	teneurin transmembrane protein 3	ZFIN	protein_coding
chr1	39675706	39677920	-	LL0000002704		BX324137.1		Clone-based (Ensembl) gene	processed_transcript
chr1	39813229	39859626	-	LL0000008733	ZDB-GENE-050417-116	dctd	dCMP deaminase	ZFIN	protein_coding
chr1	39859782	39880260	+	LL0000012855	ZDB-GENE-030131-4135	irf2a	interferon regulatory factor 2a	ZFIN	protein_coding
chr1	39878634	39895944	-	LL0000030476	ZDB-GENE-040426-1345	tmem134	transmembrane protein 134	ZFIN	protein_coding
chr1	39898327	39977551	+	LL0000029586	ZDB-GENE-090313-101	stox2a	storkhead box 2a	ZFIN	protein_coding
chr1	39981451	39983730	-	LL0000012747	ZDB-GENE-040718-147	ing2	inhibitor of growth family, member 2	ZFIN	protein_coding
chr1	39985905	39986160	-	LL0000023434		RF00030	RNA component of mitochondrial RNA processing endoribonuclease [Source:HGNC Symbol;Acc:HGNC:10031]		ribozyme
chr1	39990547	39992042	+	LL0000029148	ZDB-GENE-030131-8743	sod3b	superoxide dismutase 3, extracellular b	ZFIN	protein_coding
chr1	39995008	40009814	+	LL0000000516	ZDB-GENE-030131-6735	aip	aryl hydrocarbon receptor interacting protein	ZFIN	protein_coding
chr1	40009873	40016058	-	LL0000005361	ZDB-GENE-040718-35	cdk2ap2	cyclin-dependent kinase 2 associated protein 2	ZFIN	protein_coding
chr1	40023563	40029870	+	LL0000013632	ZDB-GENE-060217-3	lgi2b	leucine-rich repeat LGI family, member 2b	ZFIN	protein_coding
chr1	40034030	40053248	+	LL0000005041	ZDB-GENE-040718-465	ccdc149b	coiled-coil domain containing 149b	ZFIN	protein_coding
chr1	40054671	40087034	-	LL0000026673	ZDB-GENE-090313-177	si:dkey-117m1.4	si:dkey-117m1.4	ZFIN	protein_coding
chr1	40092225	40094295	-	LL0000032376		XLOC_001412		Cufflinks; see BLAST hits		moderate confidence,NP_001106978.1,il23r,interleukin 23 receptor	no Blast hit
chr1	40092225	40102899	-	LL0000005936	ZDB-GENE-090313-176	cntf	ciliary neurotrophic factor	ZFIN	protein_coding
chr1	40107811	40115242	+	LL0000024941	ZDB-GENE-090313-12	si:ch211-113e8.11	si:ch211-113e8.11	ZFIN	protein_coding
chr1	40116567	40140424	-	LL0000024940	ZDB-GENE-090313-11	si:ch211-113e8.10	si:ch211-113e8.10	ZFIN	protein_coding
chr1	40140498	40146782	+	LL0000038686	ZDB-GENE-060929-68	zgc:152658	zgc:152658	ZFIN	protein_coding
chr1	40148146	40150478	+	LL0000039120	ZDB-GENE-080723-6	zgc:194443	zgc:194443	ZFIN	protein_coding
chr1	40156021	40156794	-	LL0000015552		LOC103909020	uncharacterized LOC103909020,non-coding	GCF_000002035.6_GRCz11	lincRNA
chr1	40156907	40177693	+	LL0000024944	ZDB-GENE-090313-14	si:ch211-113e8.9	si:ch211-113e8.9	ZFIN	protein_coding
chr1	40181404	40208237	-	LL0000000792		AL953865.1	UNCHARACTERIZED	Clone-based (Ensembl) gene	protein_coding
chr1	40182853	40187449	-	LL0000018203		LOC793449	GTPase IMAP family member 4-like	GCF_000002035.6_GRCz11	protein_coding
chr1	40186407	40189893	-	LL0000024943	ZDB-GENE-090313-13	si:ch211-113e8.6	si:ch211-113e8.6	ZFIN	protein_coding
chr1	40186889	40188557	-	LL0000014078		LOC100330380	GTPase IMAP family member 4-like	GCF_000002035.6_GRCz11	protein_coding
chr1	40198942	40201140	+	LL0000024942	ZDB-GENE-090312-189	si:ch211-113e8.5	si:ch211-113e8.5	ZFIN	protein_coding
chr1	40208491	40227177	-	LL0000030174		TESK1	si:ch211-113e8.3 [Source:ZFIN;Acc:ZDB-GENE-090312-74]	HGNC symbol	protein_coding
chr1	40237276	40258430	+	LL0000009928	ZDB-GENE-040718-453	faah2a	fatty acid amide hydrolase 2a	ZFIN	protein_coding
chr1	40286011	40307808	+	LL0000031943	ZDB-GENE-090313-291	vwa10.1	von Willebrand factor A domain containing 10, tandem duplicate 1	ZFIN	protein_coding
chr1	40307944	40329641	+	LL0000031944	ZDB-GENE-090313-295	vwa10.2	von Willebrand factor A domain containing 10, tandem duplicate 2	ZFIN	protein_coding
chr1	40333705	40520223	-	LL0000018557	ZDB-GENE-090313-292	maml3	mastermind-like transcriptional coactivator 3	ZFIN	protein_coding
chr1	40522605	40524190	+	LL0000032261		XLOC_000486		Cufflinks; see BLAST hits		low confidence,XP_021335606.1,LOC101886098,Fc receptor-like protein 5, transcript variant X5	no Blast hit
chr1	40562263	40572922	+	LL0000024309	ZDB-GENE-061013-114	scoca	short coiled-coil protein a	ZFIN	protein_coding
chr1	40572757	40608559	-	LL0000005796	ZDB-GENE-060929-708	clgn	calmegin	ZFIN	protein_coding
chr1	40613292	40641622	+	LL0000019934	ZDB-GENE-030131-6031	naa15b	N(alpha)-acetyltransferase 15, NatA auxiliary subunit b	ZFIN	protein_coding
chr1	40644090	40728607	+	LL0000018247		LOC797949	ras-related protein Rab-33B-like	GCF_000002035.6_GRCz11	protein_coding
chr1	40647751	40648500	+	LL0000032262		XLOC_000490		Cufflinks; see BLAST hits		no Blast hit	no Blast hit
chr1	40663488	40670501	+	LL0000015195		LOC101885779	mucin-5AC-like	GCF_000002035.6_GRCz11	protein_coding
chr1	40663536	40671733	+	LL0000010524		FO834828.1	mucin-5AC-like [Source:NCBI gene;Acc:101885779]	Clone-based (Ensembl) gene	lincRNA
chr1	40683491	40692718	+	LL0000010525		FO834828.2		Clone-based (Ensembl) gene	lincRNA
chr1	40683497	40704565	+	LL0000032142	ZDB-GENE-030131-3331	wu:fc34e06	wu:fc34e06	ZFIN	protein_coding
chr1	40693323	40705186	+	LL0000010465		FO681323.1		Clone-based (Ensembl) gene	lincRNA
chr1	40716379	40723634	+	LL0000004395		CABZ01072532.1		Clone-based (Ensembl) gene	lincRNA
chr1	40724140	40752950	+	LL0000008042		CU550714.1	UNCHARACTERIZED	Clone-based (Ensembl) gene	protein_coding
chr1	40733921	40735381	-	LL0000038738	ZDB-GENE-061013-527	zgc:153642	zgc:153642	ZFIN	protein_coding
chr1	40736844	40738296	+	LL0000017935		LOC110439949	GTPase IMAP family member 7-like	GCF_000002035.6_GRCz11	protein_coding
chr1	40740951	40759629	+	LL0000012427	ZDB-GENE-040801-245	htra3a	HtrA serine peptidase 3a	ZFIN	protein_coding
chr1	40760448	40799856	+	LL0000011650	ZDB-GENE-110411-251	gpr78a	G protein-coupled receptor 78a	ZFIN	protein_coding
chr1	40801448	40818978	+	LL0000006181	ZDB-GENE-090313-267	cpz	carboxypeptidase Z	ZFIN	protein_coding
chr1	40837209	40902968	+	LL0000000742		AL929576.1		Clone-based (Ensembl) gene	processed_transcript
chr1	40909750	40911332	-	LL0000012195	ZDB-GENE-060825-142	hmx4	H6 family homeobox 4	ZFIN	protein_coding
chr1	40912613	40914752	-	LL0000012191	ZDB-GENE-080204-54	hmx1	H6 family homeobox 1	ZFIN	protein_coding
chr1	40991659	40994520	-	LL0000000415	ZDB-GENE-021010-3	adra2c	adrenoceptor alpha 2C	ZFIN	protein_coding
chr1	41131481	41141446	+	LL0000018344	ZDB-GENE-030131-5871	lrpap1	low density lipoprotein receptor-related protein associated protein 1	ZFIN	protein_coding
chr1	41141513	41192245	-	LL0000009144	ZDB-GENE-090312-103	dok7	docking protein 7	ZFIN	protein_coding
chr1	41201231	41290638	-	LL0000023602	ZDB-GENE-031006-13	rgs12b	regulator of G protein signaling 12b	ZFIN	protein_coding
chr1	41293964	41374117	-	LL0000012430	ZDB-GENE-990415-131	htt	huntingtin	ZFIN	protein_coding
chr1	41318241	41331772	+	LL0000007261		CR974461.1		Clone-based (Ensembl) gene	antisense
chr1	41454210	41464007	+	LL0000026160	ZDB-GENE-090313-134	si:ch211-89o9.4	si:ch211-89o9.4	ZFIN	protein_coding
chr1	41465264	41465335	-	LL0000032377		XLOC_001427		Cufflinks; see BLAST hits		low confidence,NP_001077034.2,hip1rb,huntingtin interacting protein 1 related b	low confidence,XP_011518496.1,ZDHHC13,palmitoyltransferase ZDHHC13 isoform X2
chr1	41465718	41472087	+	LL0000021219	ZDB-GENE-040426-1736	paip2b	poly(A) binding protein interacting protein 2B	ZFIN	protein_coding
chr1	41475373	41476713	+	LL0000032263		XLOC_000505		Cufflinks; see BLAST hits		low confidence,NP_001025454.1,ldlra,low density lipoprotein receptor a	no Blast hit
chr1	41478290	41485306	+	LL0000009139	ZDB-GENE-080721-2	dok1a	docking protein 1a	ZFIN	protein_coding
chr1	41487339	41492776	+	LL0000026161	ZDB-GENE-030131-7155	si:ch211-89o9.6	si:ch211-89o9.6	ZFIN	protein_coding
chr1	41573721	41593446	+	LL0000027742	ZDB-GENE-090313-316	si:dkey-56e3.2	si:dkey-56e3.2	ZFIN	protein_coding
chr1	41574709	41593446	+	LL0000018155		LOC565594	uncharacterized threonine-rich GPI-anchored glycoprotein PJ4664.02	GCF_000002035.6_GRCz11	protein_coding
chr1	41596096	41606110	+	LL0000027743	ZDB-GENE-050411-91	si:dkey-56e3.3	si:dkey-56e3.3	ZFIN	protein_coding
chr1	41609226	41620873	+	LL0000019448	ZDB-GENE-070112-412	mogs	mannosyl-oligosaccharide glucosidase	ZFIN	protein_coding
chr1	41628451	41632833	+	LL0000018244		LOC797711	zinc finger protein ZFP69-like	GCF_000002035.6_GRCz11	protein_coding
chr1	41666506	41755499	+	LL0000010218	ZDB-GENE-090313-350	fbxo41	F-box protein 41	ZFIN	protein_coding
chr1	41767582	41817808	-	LL0000023818	ZDB-GENE-041114-40	rnf24	ring finger protein 24	ZFIN	protein_coding
chr1	41849152	41865986	+	LL0000029001	ZDB-GENE-031201-3	smox	spermine oxidase	ZFIN	protein_coding
chr1	41889719	41890548	+	LL0000017812		LOC110439712	uncharacterized LOC110439712,non-coding	GCF_000002035.6_GRCz11	lincRNA
chr1	41890696	41924484	+	LL0000027621	ZDB-GENE-090312-145	si:dkey-37g12.1	si:dkey-37g12.1	ZFIN	protein_coding
chr1	41940399	41950586	+	LL0000006581		CR392347.1		Clone-based (Ensembl) gene	processed_pseudogene
chr1	41950880	41952281	-	LL0000032378		XLOC_001430		Cufflinks; see BLAST hits		moderate confidence,NP_001025454.1,ldlra,low density lipoprotein receptor a	no Blast hit
chr1	41957210	41982582	-	LL0000000412	ZDB-GENE-090312-203	adra1d	adrenoceptor alpha 1D	ZFIN	protein_coding
chr1	42224769	43039672	+	LL0000007738	ZDB-GENE-060815-3	ctnna2	catenin (cadherin-associated protein), alpha 2	ZFIN	protein_coding
chr1	42284633	42286446	-	LL0000016813		LOC108190166	uncharacterized LOC108190166,non-coding	GCF_000002035.6_GRCz11	lincRNA
chr1	42286509	42289883	-	LL0000014617		LOC101882853	uncharacterized LOC101882853,non-coding	GCF_000002035.6_GRCz11	lincRNA
chr1	42774784	42779653	-	LL0000018414	ZDB-GENE-050506-80	lrrtm1	leucine rich repeat transmembrane neuronal 1	ZFIN	protein_coding
chr1	43343738	43358677	-	LL0000017813		LOC110439713	uncharacterized LOC110439713,non-coding	GCF_000002035.6_GRCz11	lincRNA
chr1	43518254	43617126	-	LL0000032379		XLOC_001437		Cufflinks; see BLAST hits		no Blast hit	no Blast hit
chr1	43652302	43684603	-	LL0000029644	ZDB-GENE-040912-101	suclg1	succinate-CoA ligase, alpha subunit	ZFIN	protein_coding
chr1	43686251	43693283	-	LL0000005711	ZDB-GENE-040426-1381	cisd2	CDGSH iron sulfur domain 2	ZFIN	protein_coding
chr1	43695033	43727613	-	LL0000028891		SLC9B2	si:dkey-162b23.4 [Source:ZFIN;Acc:ZDB-GENE-110411-203]	HGNC symbol	protein_coding
chr1	43695114	43713359	-	LL0000026822	ZDB-GENE-110411-203	si:dkey-162b23.4	si:dkey-162b23.4	ZFIN	protein_coding
chr1	43714146	43727579	-	LL0000001866	ZDB-GENE-050417-343	bdh2	3-hydroxybutyrate dehydrogenase, type 2	ZFIN	protein_coding
chr1	43779715	43781225	-	LL0000032380		XLOC_001441		Cufflinks; see BLAST hits		low confidence,XP_021332171.1,dchs2,dachsous cadherin-related 2, transcript variant X2	no Blast hit
chr1	43781328	43782895	-	LL0000032381		XLOC_001442		Cufflinks; see BLAST hits		low confidence,XP_009295419.2,zgc:158659,zgc:158659, transcript variant X2	no Blast hit
chr1	43801867	43892349	-	LL0000029908	ZDB-GENE-090312-106	tacr3a	tachykinin receptor 3a	ZFIN	protein_coding
chr1	43894238	43899422	-	LL0000005878	ZDB-GENE-090312-66	cnga1a	cyclic nucleotide gated channel subunit alpha 1a	ZFIN	protein_coding
chr1	43901966	43905263	-	LL0000009636	ZDB-GENE-071005-4	enam	enamelin	ZFIN	protein_coding
chr1	43909928	43915672	-	LL0000024316	ZDB-GENE-090313-256	scpp5	secretory calcium-binding phosphoprotein 5	ZFIN	protein_coding
chr1	43917934	43920576	-	LL0000024317	ZDB-GENE-090313-257	scpp7	secretory calcium-binding phosphoprotein 7	ZFIN	protein_coding
chr1	43926097	43934274	-	LL0000000934	ZDB-GENE-090313-258	ambn	ameloblastin	ZFIN	protein_coding
chr1	43937168	43938122	-	LL0000017866		LOC110439846	uncharacterized LOC110439846,non-coding	GCF_000002035.6_GRCz11	lincRNA
chr1	43940902	43943154	+	LL0000006441		CR385050.2		Clone-based (Ensembl) gene	lincRNA
chr1	43945600	43948827	-	LL0000027216	ZDB-GENE-090313-259	si:dkey-22i16.7	si:dkey-22i16.7	ZFIN	protein_coding
chr1	43952298	43953627	-	LL0000006442		CR385050.3		Clone-based (Ensembl) gene	lincRNA
chr1	43953818	43958114	+	LL0000032264		XLOC_000523		Cufflinks; see BLAST hits		low confidence,XP_017207609.1,zbtb38,zinc finger and BTB domain containing 38, transcript variant X4	low confidence,NP_001308072.1,CIDEC,cell death activator CIDE-3 isoform 4
chr1	43958198	43963441	-	LL0000020813	ZDB-GENE-090313-260	odam	odontogenic, ameloblast associated	ZFIN	protein_coding
chr1	43969797	43973068	-	LL0000024319	ZDB-GENE-090424-3	scpp9	secretory calcium-binding phosphoprotein 9	ZFIN	protein_coding
chr1	43973880	43983405	-	LL0000027217	ZDB-GENE-090313-261	si:dkey-22i16.9	si:dkey-22i16.9	ZFIN	protein_coding
chr1	43985417	43987873	-	LL0000006440		CR385050.1		Clone-based (Ensembl) gene	protein_coding
chr1	43988713	44001011	-	LL0000039213	ZDB-GENE-030131-5705	zgc:66472	zgc:66472	ZFIN	protein_coding
chr1	44003654	44009286	+	LL0000027215	ZDB-GENE-090312-54	si:dkey-22i16.10	si:dkey-22i16.10	ZFIN	protein_coding
chr1	44011472	44025066	-	LL0000026192	ZDB-GENE-110411-256	si:ch73-109d9.1	si:ch73-109d9.1	ZFIN	protein_coding
chr1	44027070	44039625	-	LL0000026194	ZDB-GENE-141212-331	si:ch73-109d9.3	si:ch73-109d9.3	ZFIN	protein_coding
chr1	44038052	44039546	+	LL0000032265		XLOC_000525		Cufflinks; see BLAST hits		low confidence,NP_001018332.1,zgc:113057,zgc:113057	no Blast hit
chr1	44040211	44048798	-	LL0000026193	ZDB-GENE-030131-5611	si:ch73-109d9.2	si:ch73-109d9.2	ZFIN	protein_coding
chr1	44053641	44063732	-	LL0000026195	ZDB-GENE-141212-306	si:ch73-109d9.4	si:ch73-109d9.4	ZFIN	protein_coding
chr1	44056129	44064229	+	LL0000008317		CU915778.1	ZINC FINGER	Clone-based (Ensembl) gene	protein_coding
chr1	44067293	44087074	-	LL0000031945	ZDB-GENE-141211-58	vwa11	von Willebrand factor A domain containing 11	ZFIN	protein_coding
chr1	44068686	44072284	+	LL0000032266		XLOC_000527		Cufflinks; see BLAST hits		high confidence,XP_021332602.1,vwa11,von Willebrand factor A domain containing 11, transcript variant X2	no Blast hit
chr1	44090819	44100745	+	LL0000015568		LOC103909118	prostaglandin D2 receptor 2-like	GCF_000002035.6_GRCz11	protein_coding
chr1	44096750	44115012	-	LL0000017867		LOC110439847	uncharacterized LOC110439847,non-coding	GCF_000002035.6_GRCz11	lincRNA
chr1	44107820	44141442	+	LL0000003967	ZDB-GENE-050913-25	cabp2a	calcium binding protein 2a	ZFIN	protein_coding
chr1	44141351	44161420	-	LL0000028770	ZDB-GENE-110208-8	slc43a3a	solute carrier family 43 member 3a	ZFIN	protein_coding
chr1	44173221	44229069	+	LL0000007744	ZDB-GENE-110208-9	ctnnd1	catenin (cadherin-associated protein), delta 1	ZFIN	protein_coding
chr1	44236341	44238912	+	LL0000025263	ZDB-GENE-141212-292	si:ch211-165a10.9	si:ch211-165a10.9	ZFIN	protein_coding
chr1	44239558	44241485	+	LL0000027786	ZDB-GENE-141212-265	si:dkey-59p5.2	si:dkey-59p5.2	ZFIN	protein_coding
chr1	44246467	44248675	+	LL0000025261	ZDB-GENE-141212-330	si:ch211-165a10.11	si:ch211-165a10.11	ZFIN	protein_coding
chr1	44249616	44251595	+	LL0000025260	ZDB-GENE-141212-255	si:ch211-165a10.10	si:ch211-165a10.10	ZFIN	protein_coding
chr1	44256883	44259377	+	LL0000025262	ZDB-GENE-141212-298	si:ch211-165a10.8	si:ch211-165a10.8	ZFIN	protein_coding
chr1	44336897	44339528	+	LL0000025259	ZDB-GENE-090312-44	si:ch211-165a10.1	si:ch211-165a10.1	ZFIN	protein_coding
chr1	44340124	44342519	+	LL0000007560		CT033803.2	PIM PROTO ONCOGENE SERINE/THREONINE KINASE RELATED	Clone-based (Ensembl) gene	protein_coding
chr1	44367463	44413629	+	LL0000007633		CT583626.1		Clone-based (Ensembl) gene	protein_coding
chr1	44390456	44395246	+	LL0000030315	ZDB-GENE-040718-427	timm10	translocase of inner mitochondrial membrane 10 homolog (yeast)	ZFIN	protein_coding
chr1	44395976	44422146	+	LL0000031634	ZDB-GENE-130424-1	unc93b1	unc-93 homolog B1, TLR signaling regulator	ZFIN	protein_coding
chr1	44421920	44434707	-	LL0000007362	ZDB-GENE-041010-40	cryba1l2	crystallin, beta A1, like 2	ZFIN	protein_coding
chr1	44439661	44448387	+	LL0000007368	ZDB-GENE-070822-18	crybb1l2	crystallin, beta B1, like 2	ZFIN	protein_coding
chr1	44491077	44495902	+	LL0000024088	ZDB-GENE-040310-4	rtn4rl2a	reticulon 4 receptor-like 2 a	ZFIN	protein_coding
chr1	44523515	44566433	+	LL0000038394	ZDB-GENE-090312-92	zdhhc5a	zinc finger DHHC-type palmitoyltransferase 5a	ZFIN	protein_coding
chr1	44534625	44536218	-	LL0000003611		BX908740.1		Clone-based (Ensembl) gene	antisense
chr1	44569282	44581937	-	LL0000030708	ZDB-GENE-040625-105	tmx2b	thioredoxin-related transmembrane protein 2b	ZFIN	protein_coding
chr1	44582369	44591489	+	LL0000018832	ZDB-GENE-040727-4	med19b	mediator complex subunit 19b	ZFIN	protein_coding
chr1	44591492	44638058	-	LL0000028767	ZDB-GENE-070209-173	slc43a1b	solute carrier family 43 member 1b	ZFIN	protein_coding
chr1	44651727	44704261	-	LL0000027521	ZDB-GENE-090501-2	si:dkey-28b4.8	si:dkey-28b4.8	ZFIN	protein_coding
chr1	44707054	44710937	-	LL0000027520	ZDB-GENE-050506-118	si:dkey-28b4.7	si:dkey-28b4.7	ZFIN	protein_coding
chr1	44710943	44739559	+	LL0000029433	ZDB-GENE-041008-209	ssrp1b	structure specific recognition protein 1b	ZFIN	protein_coding
chr1	44746088	44758470	+	LL0000021166	ZDB-GENE-030319-3	p2rx3b	purinergic receptor P2X, ligand-gated ion channel, 3b	ZFIN	protein_coding
chr1	44767657	44770055	+	LL0000028066	ZDB-GENE-090313-363	si:dkey-9i23.4	si:dkey-9i23.4	ZFIN	protein_coding
chr1	44780849	44783558	+	LL0000028067	ZDB-GENE-090313-364	si:dkey-9i23.5	si:dkey-9i23.5	ZFIN	protein_coding
chr1	44783959	44796677	-	LL0000028068	ZDB-GENE-090313-365	si:dkey-9i23.6	si:dkey-9i23.6	ZFIN	protein_coding
chr1	44800265	44802763	+	LL0000030539	ZDB-GENE-090313-366	tmem187	transmembrane protein 187	ZFIN	protein_coding
chr1	44801160	44812023	-	LL0000028069	ZDB-GENE-090313-367	si:dkey-9i23.8	si:dkey-9i23.8	ZFIN	protein_coding
chr1	44814322	44823071	+	LL0000020153	ZDB-GENE-040426-2153	ndufs8a	NADH:ubiquinone oxidoreductase core subunit S8a	ZFIN	protein_coding
chr1	44826220	44838503	+	LL0000029619		STX3	zgc:165520 [Source:ZFIN;Acc:ZDB-GENE-070620-13]	HGNC symbol	protein_coding
chr1	44838706	44876305	+	LL0000013239	ZDB-GENE-061215-144	kdm2aa	lysine (K)-specific demethylase 2Aa	ZFIN	protein_coding
chr1	44870880	44901163	-	LL0000030092	ZDB-GENE-090311-31	tcirg1a	T cell immune regulator 1, ATPase H+ transporting V0 subunit a3a	ZFIN	protein_coding
chr1	44894581	44926013	+	LL0000032137	ZDB-GENE-030131-2925	wu:fc21g02	wu:fc21g02	ZFIN	protein_coding
chr1	44925422	44928987	-	LL0000028064	ZDB-GENE-090313-361	si:dkey-9i23.15	si:dkey-9i23.15	ZFIN	protein_coding
chr1	44930339	44933644	-	LL0000028063	ZDB-GENE-090313-360	si:dkey-9i23.14	si:dkey-9i23.14	ZFIN	protein_coding
chr1	44935306	44940992	-	LL0000030516	ZDB-GENE-080902-2	tmem176	transmembrane protein 176	ZFIN	protein_coding
chr1	44940643	44949489	+	LL0000028065	ZDB-GENE-090313-362	si:dkey-9i23.16	si:dkey-9i23.16	ZFIN	protein_coding
chr1	44949909	44963259	+	LL0000031895	ZDB-GENE-061110-126	vps37c	VPS37C subunit of ESCRT-I	ZFIN	protein_coding
chr1	44967637	44976900	+	LL0000008379		CU929294.2		Clone-based (Ensembl) gene	lincRNA
chr1	44983825	44997770	+	LL0000008378		CU929294.1	transmembrane protein 132A [Source:NCBI gene;Acc:100002045]	Clone-based (Ensembl) gene	processed_transcript
chr1	44992207	44994299	+	LL0000030473	ZDB-GENE-140106-237	tmem132a	transmembrane protein 132A	ZFIN	protein_coding
chr1	45000577	45000648	+	LL0000032267		XLOC_000567		Cufflinks; see BLAST hits		low confidence,NP_001005575.1,bcl9l,B-cell CLL/lymphoma 9-like	no Blast hit
chr1	45001418	45001490	+	LL0000032268		XLOC_000568		Cufflinks; see BLAST hits		low confidence,XP_021331059.1,LOC103910884,uncharacterized LOC103910884	no Blast hit
chr1	45002919	45016005	+	LL0000009039	ZDB-GENE-030131-2642	dnaja1	DnaJ heat shock protein family (Hsp40) member A1	ZFIN	protein_coding
chr1	45012391	45042316	-	LL0000029019	ZDB-GENE-130530-635	smu1b	SMU1 DNA replication regulator and spliceosomal factor b	ZFIN	protein_coding
chr1	45043767	45049603	-	LL0000023993	ZDB-GENE-040801-8	rps6	ribosomal protein S6	ZFIN	protein_coding
chr1	45056371	45079967	+	LL0000002067	ZDB-GENE-090511-2	btr01	bloodthirsty-related gene family, member 1	ZFIN	protein_coding
chr1	45080774	45096935	+	LL0000025153	ZDB-GENE-141212-230	si:ch211-151p13.8	si:ch211-151p13.8	ZFIN	protein_coding
chr1	45115896	45136816	+	LL0000019751	ZDB-GENE-061207-26	muc13a	mucin 13a, cell surface associated	ZFIN	protein_coding
chr1	45138800	45146834	-	LL0000025769	ZDB-GENE-061009-18	si:ch211-239f4.6	si:ch211-239f4.6	ZFIN	protein_coding
chr1	45149844	45157243	-	LL0000019760	ZDB-GENE-061009-17	mucms1	mucin, multiple PTS and SEA group, member 1	ZFIN	protein_coding
chr1	45170046	45170652	+	LL0000000790		AL953855.1		Clone-based (Ensembl) gene	processed_transcript
chr1	45173421	45177401	-	LL0000038531	ZDB-GENE-050417-335	zgc:111983	zgc:111983	ZFIN	protein_coding
chr1	45199776	45202769	-	LL0000032382		XLOC_001482		Cufflinks; see BLAST hits		moderate confidence,NP_001106978.1,il23r,interleukin 23 receptor	no Blast hit
chr1	45205920	45215343	-	LL0000008781	ZDB-GENE-030131-4275	ddx39aa	DEAD (Asp-Glu-Ala-Asp) box polypeptide 39Aa	ZFIN	protein_coding
chr1	45217390	45303707	+	LL0000025768	ZDB-GENE-061207-24	si:ch211-239f4.1	si:ch211-239f4.1	ZFIN	protein_coding
chr1	45299405	45303707	+	LL0000032269		XLOC_000574		Cufflinks; see BLAST hits		high confidence,XP_021332683.1,si:ch211-239f4.1,si:ch211-239f4.1, transcript variant X3	high confidence,XP_011517372.1,GFI1B,zinc finger protein Gfi-1b isoform X2
chr1	45307161	45313876	-	LL0000013768		LO017716.1	uncharacterized LOC110439861 [Source:NCBI gene;Acc:110439861]	Clone-based (Ensembl) gene	lincRNA
chr1	45315266	45320570	-	LL0000026587	ZDB-GENE-090312-218	si:ch73-90k17.1	si:ch73-90k17.1	ZFIN	protein_coding
chr1	45323021	45330464	+	LL0000009624	ZDB-GENE-070822-2	emp1	epithelial membrane protein 1	ZFIN	protein_coding
chr1	45332629	45341851	-	LL0000038458	ZDB-GENE-041010-181	zgc:101679	zgc:101679	ZFIN	protein_coding
chr1	45341934	45347393	-	LL0000025793	ZDB-GENE-061207-29	si:ch211-243a20.4	si:ch211-243a20.4	ZFIN	protein_coding
chr1	45351890	45366422	+	LL0000025792	ZDB-GENE-061207-28	si:ch211-243a20.3	si:ch211-243a20.3	ZFIN	protein_coding
chr1	45372562	45566028	-	LL0000011736	ZDB-GENE-061207-27	grin2bb	glutamate receptor, ionotropic, N-methyl D-aspartate 2B, genome duplicate b	ZFIN	protein_coding
chr1	45570059	45616470	-	LL0000001532	ZDB-GENE-061103-178	atf7ip	activating transcription factor 7 interacting protein	ZFIN	protein_coding
chr1	45616067	45636362	-	LL0000024469	ZDB-GENE-050522-375	sept3	septin 3	ZFIN	protein_coding
chr1	45637167	45648288	-	LL0000002919		BX511120.1		Clone-based (Ensembl) gene	protein_coding
chr1	45650285	45662774	-	LL0000024487	ZDB-GENE-030131-1368	serhl	serine hydrolase like	ZFIN	protein_coding
chr1	45663727	45669444	+	LL0000031036	ZDB-GENE-040718-185	trappc5	trafficking protein particle complex 5	ZFIN	protein_coding
chr1	45671040	45700747	+	LL0000018782	ZDB-GENE-040426-2704	mcoln1a	mucolipin 1a	ZFIN	protein_coding
chr1	45703647	45705986	+	LL0000032270		XLOC_000580		Cufflinks; see BLAST hits		low confidence,NP_001139082.1,tmem176,transmembrane protein 176	no Blast hit
chr1	45707083	45744854	+	LL0000025569	ZDB-GENE-030131-6275	si:ch211-214c7.4	si:ch211-214c7.4	ZFIN	protein_coding
chr1	45744118	45752261	-	LL0000025570	ZDB-GENE-061207-16	si:ch211-214c7.5	si:ch211-214c7.5	ZFIN	protein_coding
chr1	45754857	45836250	+	LL0000022029	ZDB-GENE-061207-17	pkn1a	protein kinase N1a	ZFIN	protein_coding
chr1	45838995	45839877	-	LL0000015574		LOC103909160	uncharacterized LOC103909160,non-coding	GCF_000002035.6_GRCz11	lincRNA
chr1	45839541	45864026	+	LL0000018592	ZDB-GENE-090312-186	map2k7	mitogen-activated protein kinase kinase 7	ZFIN	protein_coding
chr1	45866692	45920656	-	LL0000022225	ZDB-GENE-050107-4	pnpla6	patatin-like phospholipase domain containing 6	ZFIN	protein_coding
chr1	45922699	45924004	+	LL0000013708	ZDB-GENE-060929-112	lipt1	lipoyltransferase 1	ZFIN	protein_coding
chr1	45925150	45959721	+	LL0000009540	ZDB-GENE-050208-20	eif5b	eukaryotic translation initiation factor 5B	ZFIN	protein_coding
chr1	45958725	46020725	+	LL0000001328	ZDB-GENE-041212-49	arhgef7b	Rho guanine nucleotide exchange factor (GEF) 7b	ZFIN	protein_coding
chr1	46026457	46030577	+	LL0000025080	ZDB-GENE-090311-41	si:ch211-138g9.2	si:ch211-138g9.2	ZFIN	protein_coding
chr1	46032790	46153200	+	LL0000000700		AL929216.1		Clone-based (Ensembl) gene	lincRNA
chr1	46194333	46196107	+	LL0000029189	ZDB-GENE-060322-5	sox1b	SRY-box transcription factor 1b	ZFIN	protein_coding
chr1	46238718	46244523	-	LL0000025081	ZDB-GENE-090311-27	si:ch211-138g9.3	si:ch211-138g9.3	ZFIN	protein_coding
chr1	46250113	46251822	+	LL0000000824		AL954317.1		Clone-based (Ensembl) gene	processed_transcript
chr1	46263459	46401385	-	LL0000001569	ZDB-GENE-090311-52	atp11a	ATPase phospholipid transporting 11A	ZFIN	protein_coding
chr1	46400612	46401636	+	LL0000002759		BX465849.1		Clone-based (Ensembl) gene	processed_transcript
chr1	46404968	46452686	+	LL0000031366	ZDB-GENE-030616-538	tubgcp3	tubulin, gamma complex associated protein 3	ZFIN	protein_coding
chr1	46464482	46595057	+	LL0000018759	ZDB-GENE-090312-122	mcf2la	mcf.2 cell line derived transforming sequence-like a	ZFIN	protein_coding
chr1	46598502	46617283	+	LL0000003958	ZDB-GENE-041114-204	cab39l	calcium binding protein 39-like	ZFIN	protein_coding
chr1	46617006	46632966	-	LL0000005267	ZDB-GENE-041114-163	cdadc1	cytidine and dCMP deaminase domain containing 1	ZFIN	protein_coding
chr1	46635236	46650102	-	LL0000023342	ZDB-GENE-030131-7951	rcbtb1	regulator of chromosome condensation (RCC1) and BTB (POZ) domain containing protein 1	ZFIN	protein_coding
chr1	46652615	46654528	+	LL0000001346	ZDB-GENE-030131-3410	arl11	ADP-ribosylation factor-like 11	ZFIN	protein_coding
chr1	46660213	46663997	-	LL0000009349	ZDB-GENE-030616-542	ebpl	EBP like	ZFIN	protein_coding
chr1	46666042	46706673	-	LL0000013442	ZDB-GENE-030616-541	kpna3	karyopherin alpha 3 (importin alpha 4)	ZFIN	protein_coding
chr1	46709370	46718769	-	LL0000029328	ZDB-GENE-040426-2713	spryd7a	SPRY domain containing 7a	ZFIN	protein_coding
chr1	46718500	46743552	-	LL0000002512		BX294379.1		Clone-based (Ensembl) gene	processed_transcript
chr1	46722379	46722518	-	LL0000019132	ZDB-MIRNAG-041228-16	mir16b	microRNA 16b	ZFIN	miRNA
chr1	46722622	46722705	-	LL0000019127	ZDB-MIRNAG-081208-10	mir15a-1	microRNA 15a-1	ZFIN	miRNA
chr1	46726367	46744936	-	LL0000016815		LOC108190346	uncharacterized LOC108190346,non-coding	GCF_000002035.6_GRCz11	lincRNA
chr1	46775531	46782563	+	LL0000016914		LOC108191637	uncharacterized LOC108191637	GCF_000002035.6_GRCz11	protein_coding
chr1	46775531	46782563	+	LL0000032271		XLOC_000597		Cufflinks; see BLAST hits		exact match,XP_021332828.1,LOC101884727,uncharacterized LOC101884727	low confidence,NP_059115.1,ASIC5,acid-sensing ion channel 5
chr1	46775531	46782563	+	LL0000014973		LOC101884727	uncharacterized LOC101884727	GCF_000002035.6_GRCz11	protein_coding
chr1	46783424	46785907	+	LL0000032272		XLOC_000598		Cufflinks; see BLAST hits		high confidence,XP_009289536.1,si:ch211-276i12.9,si:ch211-276i12.9	no Blast hit
chr1	46786323	46788715	+	LL0000032273		XLOC_000599		Cufflinks; see BLAST hits		low confidence,NP_571394.1,opn1sw1,opsin 1 (cone pigments), short-wave-sensitive 1	low confidence,NP_001269594.1,MICAL2,[F-actin]-monooxygenase MICAL2 isoform c
chr1	46826721	46833354	-	LL0000026250	ZDB-GENE-100922-213	si:ch73-160h15.3	si:ch73-160h15.3	ZFIN	protein_coding
chr1	46827891	46845676	+	LL0000008423		CU986305.1		Clone-based (Ensembl) gene	antisense
chr1	46834730	46875557	-	LL0000000471	ZDB-GENE-040426-2765	agpat3	1-acylglycerol-3-phosphate O-acyltransferase 3	ZFIN	protein_coding
chr1	46878353	46925052	-	LL0000021564	ZDB-GENE-030616-521	pdxkb	pyridoxal (pyridoxine, vitamin B6) kinase b	ZFIN	protein_coding
chr1	46937220	46958827	+	LL0000030682	ZDB-GENE-030616-522	tmprss3b	transmembrane serine protease 3b	ZFIN	protein_coding
chr1	46960232	46984409	-	LL0000022035	ZDB-GENE-020123-1	pknox1.2	pbx/knotted 1 homeobox 1.2	ZFIN	protein_coding
chr1	46985633	46990345	-	LL0000027220	ZDB-GENE-110914-188	si:dkey-22n8.3	si:dkey-22n8.3	ZFIN	protein_coding
chr1	46994017	47089878	-	LL0000012981	ZDB-GENE-030616-226	itsn1	intersectin 1 (SH3 domain protein)	ZFIN	protein_coding
chr1	47089501	47105231	+	LL0000007416	ZDB-GENE-040718-378	cryzl1	crystallin, zeta (quinone reductase)-like 1	ZFIN	protein_coding
chr1	47106268	47114319	-	LL0000024535	ZDB-GENE-050808-2	setd4	SET domain containing 4	ZFIN	protein_coding
chr1	47116121	47122157	-	LL0000018994	ZDB-GENE-070705-176	mhc1zea	major histocompatibility complex class I ZEA	ZFIN	protein_coding
chr1	47124621	47135341	-	LL0000018993	ZDB-GENE-130206-7	mhc1zda	major histocompatibility complex class I ZDA	ZFIN	protein_coding
chr1	47140787	47151827	-	LL0000018992	ZDB-GENE-070424-4	mhc1zca	major histocompatibility complex class I ZCA	ZFIN	protein_coding
chr1	47153128	47161996	-	LL0000018991	ZDB-GENE-040426-2149	mhc1zba	major histocompatibility complex class I ZBA	ZFIN	protein_coding
chr1	47165814	47173403	+	LL0000004989	ZDB-GENE-030902-2	cbr1	carbonyl reductase 1	ZFIN	protein_coding
chr1	47175698	47177262	-	LL0000032383		XLOC_001518		Cufflinks; see BLAST hits		low confidence,XP_021335606.1,LOC101886098,Fc receptor-like protein 5, transcript variant X5	no Blast hit
chr1	47178394	47205369	+	LL0000019455	ZDB-GENE-040801-98	morc3b	MORC family CW-type zinc finger 3b	ZFIN	protein_coding
chr1	47228255	47411186	+	LL0000001854	ZDB-GENE-090313-135	bcl9	BCL9 transcription coactivator	ZFIN	protein_coding
chr1	47239093	47241576	+	LL0000032274		XLOC_000606		Cufflinks; see BLAST hits		no Blast hit	no Blast hit
chr1	47412497	47431453	-	LL0000011346	ZDB-GENE-050616-11	gja5b	gap junction protein, alpha 5b	ZFIN	protein_coding
chr1	47445679	47450001	+	LL0000011348	ZDB-GENE-010607-3	gja8b	gap junction protein alpha 8 paralog b	ZFIN	protein_coding
chr1	47459723	47485360	+	LL0000010895	ZDB-GENE-030131-4148	fstl1a	follistatin-like 1a	ZFIN	protein_coding
chr1	47486063	47495948	+	LL0000018383	ZDB-GENE-090312-76	lrrc58a	leucine rich repeat containing 58a	ZFIN	protein_coding
chr1	47499888	47513484	+	LL0000029578	ZDB-GENE-040426-1390	stn1	STN1 subunit of CST complex	ZFIN	protein_coding
chr1	47515821	47691312	+	LL0000024648	ZDB-GENE-060503-271	sh3pxd2aa	SH3 and PX domains 2Aa	ZFIN	protein_coding
chr1	47701924	47771742	-	LL0000020219	ZDB-GENE-090311-3	neurl1aa	neuralized E3 ubiquitin protein ligase 1Aa	ZFIN	protein_coding
chr1	47831619	48012257	+	LL0000005514	ZDB-GENE-060929-128	cfap58	cilia and flagella associated protein 58	ZFIN	protein_coding
chr1	48014441	48490115	+	LL0000010512		FO818719.1	zmp:0000001327 [Source:NCBI gene;Acc:100534837]	Clone-based (Ensembl) gene	protein_coding
chr1	48492930	48493825	+	LL0000032275		XLOC_000617		Cufflinks; see BLAST hits		no Blast hit	no Blast hit
chr1	48494810	48496778	+	LL0000032276		XLOC_000618		Cufflinks; see BLAST hits		low confidence,XP_021335605.1,LOC101886098,Fc receptor-like protein 5, transcript variant X2	no Blast hit
chr1	48581374	48615105	-	LL0000013767		LO017711.1	VACUOLAR SORTING/TARGETING 10 PRECURSOR CARBOXYPEPTIDASE Y RECEPTOR CPY RECEPTOR SORTILIN VPS10 VACUOLAR CARBOXYPEPTIDASE SORTING RECEPTOR VPS10	Clone-based (Ensembl) gene	protein_coding
chr1	48711547	48712355	+	LL0000032277		XLOC_000619		Cufflinks; see BLAST hits		low confidence,XP_005169676.1,nocta,nocturnin a, transcript variant X2	no Blast hit
chr1	48714330	48717397	+	LL0000017048		LOC110437846	uncharacterized LOC110437846,non-coding	GCF_000002035.6_GRCz11	lincRNA
chr1	48921944	48922273	-	LL0000024926	ZDB-GENE-110914-236	si:ch211-112b1.2	si:ch211-112b1.2	ZFIN	protein_coding
chr1	48923328	48927049	+	LL0000006920		CR788248.1		Clone-based (Ensembl) gene	lincRNA
chr1	48997724	49088559	-	LL0000002350		BX088594.1		Clone-based (Ensembl) gene	lincRNA
chr1	49222164	49225890	-	LL0000008490	ZDB-GENE-090313-165	cxcl18b	chemokine (C-X-C motif) ligand 18b	ZFIN	protein_coding
chr1	49244351	49250513	-	LL0000026574	ZDB-GENE-110914-243	si:ch73-6k14.2	si:ch73-6k14.2	ZFIN	protein_coding
chr1	49266810	49296900	+	LL0000004830	ZDB-GENE-090313-405	caly	calcyon neuron-specific vesicular protein	ZFIN	protein_coding
chr1	49352900	49355313	+	LL0000019664	ZDB-GENE-980526-26	msx1b	muscle segment homeobox 1b	ZFIN	protein_coding
chr1	49357538	49362899	-	LL0000028272	ZDB-GENE-090313-404	si:dkeyp-80c12.8	si:dkeyp-80c12.8	ZFIN	protein_coding
chr1	49364743	49410205	-	LL0000028271		si:dkeyp-80c12.7	si:dkeyp-80c12.7 [Source:ZFIN;Acc:ZDB-GENE-090312-2]	ZFIN	protein_coding
chr1	49415281	49432147	+	LL0000029926	ZDB-GENE-051120-180	taf5	TAF5 RNA polymerase II, TATA box binding protein (TBP)-associated factor	ZFIN	protein_coding
chr1	49432137	49434892	-	LL0000001614	ZDB-GENE-110914-234	atp5md	ATP synthase membrane subunit DAPIT	ZFIN	protein_coding
chr1	49435014	49481202	+	LL0000021478	ZDB-GENE-030131-4076	pdcd11	programmed cell death 11	ZFIN	protein_coding
chr1	49481203	49498286	-	LL0000039079	ZDB-GENE-080303-32	zgc:175214	zgc:175214	ZFIN	protein_coding
chr1	49501171	49507631	-	LL0000028270	ZDB-GENE-090312-195	si:dkeyp-80c12.5	si:dkeyp-80c12.5	ZFIN	protein_coding
chr1	49510062	49513229	+	LL0000028269	ZDB-GENE-090313-403	si:dkeyp-80c12.4	si:dkeyp-80c12.4	ZFIN	protein_coding
chr1	49514224	49521411	-	LL0000039724	ZDB-GENE-060817-5	zp3c	zona pellucida glycoprotein 3c	ZFIN	protein_coding
chr1	49524315	49531008	-	LL0000025976	ZDB-GENE-090311-7	si:ch211-281g13.5	si:ch211-281g13.5	ZFIN	protein_coding
chr1	49532653	49544625	-	LL0000028789	ZDB-GENE-070615-14	slc47a2.2	solute carrier family 47 member 2.2	ZFIN	protein_coding
chr1	49546733	49558882	-	LL0000025975	ZDB-GENE-090311-16	si:ch211-281g13.4	si:ch211-281g13.4	ZFIN	protein_coding
chr1	49568335	49605854	+	LL0000005989	ZDB-GENE-090313-107	col17a1a	collagen, type XVII, alpha 1a	ZFIN	protein_coding
chr1	49595218	49649122	-	LL0000028922	ZDB-GENE-030131-1684	slkb	STE20-like kinase b	ZFIN	protein_coding
chr1	49650998	49674006	+	LL0000031223	ZDB-GENE-061013-482	tsga10	testis specific, 10	ZFIN	protein_coding
chr1	49675943	49699083	+	LL0000025133	ZDB-GENE-090313-40	si:ch211-149l1.2	si:ch211-149l1.2	ZFIN	protein_coding
chr1	49699903	49715822	+	LL0000008067		CU570972.1		Clone-based (Ensembl) gene	processed_transcript
chr1	49805384	49805818	-	LL0000006551		CR391978.1		Clone-based (Ensembl) gene	processed_pseudogene
chr1	49814461	49905357	+	LL0000013594	ZDB-GENE-990714-26	lef1	lymphoid enhancer-binding factor 1	ZFIN	protein_coding
chr1	49909672	49919042	-	LL0000011918	ZDB-GENE-040801-261	hadh	hydroxyacyl-CoA dehydrogenase	ZFIN	protein_coding
chr1	49920772	49932256	-	LL0000008595	ZDB-GENE-070730-1	cyp2u1	cytochrome P450, family 2, subfamily U, polypeptide 1	ZFIN	protein_coding
chr1	49933623	49950643	-	LL0000024598	ZDB-GENE-070730-2	sgms2a	sphingomyelin synthase 2a	ZFIN	protein_coding
chr1	49937328	50065603	+	LL0000011809	ZDB-GENE-050320-41	gstcd	glutathione S-transferase, C-terminal domain containing	ZFIN	protein_coding
chr1	50085370	50190997	+	LL0000020537		npnt	nephronectin [Source:ZFIN;Acc:ZDB-GENE-090312-201]	ZFIN	protein_coding
chr1	50159645	50167792	-	LL0000002997		BX537118.1	UNCHARACTERIZED	Clone-based (Ensembl) gene	protein_coding
chr1	50198607	50293966	-	LL0000030027	ZDB-GENE-070112-1062	tbck	TBC1 domain containing kinase	ZFIN	protein_coding
chr1	50293938	50319654	+	LL0000000514		aimp1	aminoacyl tRNA synthetase complex-interacting multifunctional protein 1 [Source:ZFIN;Acc:ZDB-GENE-060825-144]	ZFIN	protein_coding
chr1	50389237	50438349	-	LL0000008963	ZDB-GENE-080204-14	dkk2	dickkopf WNT signaling pathway inhibitor 2	ZFIN	protein_coding
chr1	50481514	50528026	-	LL0000021262	ZDB-GENE-080721-5	papss1	3'-phosphoadenosine 5'-phosphosulfate synthase 1	ZFIN	protein_coding
chr1	50529409	50534249	-	LL0000015086		LOC101885315	uncharacterized LOC101885315	GCF_000002035.6_GRCz11	protein_coding
chr1	50538096	50558840	+	LL0000022017	ZDB-GENE-040827-4	pkd2	polycystic kidney disease 2	ZFIN	protein_coding
chr1	50559060	50562403	+	LL0000032278		XLOC_000638		Cufflinks; see BLAST hits		low confidence,NP_001025454.1,ldlra,low density lipoprotein receptor a	low confidence,XP_016871671.1,MALRD1,MAM and LDL-receptor class A domain-containing protein 1 isoform X4
chr1	50564405	50592813	-	LL0000000073	ZDB-GENE-050517-38	abcg2d	ATP-binding cassette, sub-family G (WHITE), member 2d	ZFIN	protein_coding
chr1	50593711	50611050	-	LL0000022402	ZDB-GENE-050306-8	ppm1k	protein phosphatase, Mg2+/Mn2+ dependent, 1K	ZFIN	protein_coding
chr1	50613868	50637221	+	LL0000026283	ZDB-GENE-090311-56	si:ch73-190m4.1	si:ch73-190m4.1	ZFIN	protein_coding
chr1	50639416	50693814	+	LL0000012061	ZDB-GENE-090313-139	herc3	HECT and RLD domain containing E3 ubiquitin protein ligase 3	ZFIN	protein_coding
chr1	50694971	50710468	-	LL0000009991	ZDB-GENE-050208-102	fam13a	family with sequence similarity 13 member A	ZFIN	protein_coding
chr1	50737700	50766309	-	LL0000004061		CABZ01031868.1		Clone-based (Ensembl) gene	lincRNA
chr1	50773727	50791280	-	LL0000004062		CABZ01031870.1	FAM13A	Clone-based (Ensembl) gene	protein_coding
chr1	50793909	50838291	-	LL0000038777	ZDB-GENE-070615-2	zgc:154142	zgc:154142	ZFIN	protein_coding
chr1	50847543	50859099	-	LL0000028125	ZDB-GENE-090313-376	si:dkeyp-123h10.2	si:dkeyp-123h10.2	ZFIN	protein_coding
chr1	50921266	50929957	+	LL0000021138	ZDB-GENE-980526-27	otx2a	orthodenticle homeobox 2a	ZFIN	protein_coding
chr1	50957080	50957547	-	LL0000032384		XLOC_001550		Cufflinks; see BLAST hits		low confidence,NP_001352084.1,ecpas,proteasome-associated protein ECM29 homolog isoform 2	no Blast hit
chr1	50968908	50990889	+	LL0000018801	ZDB-GENE-040204-1	mdh1aa	malate dehydrogenase 1Aa, NAD (soluble)	ZFIN	protein_coding
chr1	50992670	51018553	+	LL0000031567	ZDB-GENE-090311-46	ugp2a	UDP-glucose pyrophosphorylase 2a	ZFIN	protein_coding
chr1	51019184	51038885	-	LL0000029238	ZDB-GENE-040426-2331	spast	spastin	ZFIN	protein_coding
chr1	51039558	51042332	+	LL0000009176	ZDB-GENE-040718-136	dpy30	dpy-30 histone methyltransferase complex regulatory subunit	ZFIN	protein_coding
chr1	51043300	51045904	-	LL0000032385		XLOC_001552		Cufflinks; see BLAST hits		no Blast hit	no Blast hit
chr1	51048975	51062405	-	LL0000022727	ZDB-GENE-000330-9	psen2	presenilin 2	ZFIN	protein_coding
chr1	51062575	51066218	-	LL0000032386		XLOC_001554		Cufflinks; see BLAST hits		low confidence,NP_001106978.1,il23r,interleukin 23 receptor	no Blast hit
chr1	51066671	51082389	-	LL0000029359	ZDB-GENE-050417-199	srd5a2a	steroid-5-alpha-reductase, alpha polypeptide 2a	ZFIN	protein_coding
chr1	51104984	51157706	-	LL0000013002	ZDB-GENE-011128-2	jag1a	jagged canonical Notch ligand 1a	ZFIN	protein_coding
chr1	51191049	51202202	+	LL0000002052	ZDB-GENE-090312-7	btbd3a	BTB (POZ) domain containing 3a	ZFIN	protein_coding
chr1	51202984	51219965	-	LL0000009802	ZDB-GENE-030131-4917	esf1	ESF1, nucleolar pre-rRNA processing protein, homolog (S. cerevisiae)	ZFIN	protein_coding
chr1	51221298	51230364	+	LL0000020130	ZDB-GENE-070410-110	ndufaf5	NADH:ubiquinone oxidoreductase complex assembly factor 5	ZFIN	protein_coding
chr1	51229194	51270158	-	LL0000013288	ZDB-GENE-090313-233	kif16ba	kinesin family member 16Ba	ZFIN	protein_coding
chr1	51273676	51274569	-	LL0000032387		XLOC_001559		Cufflinks; see BLAST hits		no Blast hit	low confidence,NP_031391.2,PADI2,protein-arginine deiminase type-2
chr1	51281817	51377850	+	LL0000018694	ZDB-GENE-121214-221	mast1a	microtubule associated serine/threonine kinase 1a	ZFIN	protein_coding
chr1	51380694	51382594	+	LL0000032279		XLOC_000651		Cufflinks; see BLAST hits		no Blast hit	no Blast hit
chr1	51386609	51406783	+	LL0000001547	ZDB-GENE-041111-102	atg4da	autophagy related 4D, cysteine peptidase a	ZFIN	protein_coding
chr1	51407471	51428219	+	LL0000000234	ZDB-GENE-040426-2894	actr2a	actin related protein 2a	ZFIN	protein_coding
chr1	51444435	51475000	-	LL0000029317	ZDB-GENE-110830-2	spred2a	sprouty related EVH1 domain containing 2a	ZFIN	protein_coding
chr1	51475094	51525086	+	LL0000018863	ZDB-GENE-020122-3	meis1a	Meis homeobox 1 a	ZFIN	protein_coding
chr1	51530594	51546181	+	LL0000009824	ZDB-GENE-080204-12	etaa1	ETAA1 activator of ATR kinase	ZFIN	protein_coding
chr1	51557717	51591464	-	LL0000022483	ZDB-GENE-040912-18	ppp3r1b	protein phosphatase 3 (formerly 2B), regulatory s1ubunit B, alpha isoform, b	ZFIN	protein_coding
chr1	51593884	51606552	-	LL0000005931	ZDB-GENE-040801-126	cnrip1a	cannabinoid receptor interacting protein 1a	ZFIN	protein_coding
chr1	51608194	51615476	-	LL0000010224		FBXO48	si:dkey-202b17.4 [Source:ZFIN;Acc:ZDB-GENE-121214-308]	HGNC symbol	protein_coding
chr1	51614077	51653787	+	LL0000038899	ZDB-GENE-070928-6	zgc:165656	zgc:165656	ZFIN	protein_coding
chr1	51672640	51692384	-	LL0000022640	ZDB-GENE-110411-180	prokr1a	prokineticin receptor 1a	ZFIN	protein_coding
chr1	51702085	51710340	-	LL0000029076	ZDB-GENE-060616-2	snrpb2	small nuclear ribonucleoprotein polypeptide B2	ZFIN	protein_coding
chr1	51712869	51720633	-	LL0000023737	ZDB-GENE-040426-976	rnaseh2a	ribonuclease H2, subunit A	ZFIN	protein_coding
chr1	51721851	51729862	+	LL0000022533	ZDB-GENE-030326-2	prdx2	peroxiredoxin 2	ZFIN	protein_coding
chr1	51732979	51734535	-	LL0000013045	ZDB-GENE-040426-2172	junba	JunB proto-oncogene, AP-1 transcription factor subunit a	ZFIN	protein_coding
chr1	51753093	51826020	+	LL0000003088		BX548032.3	si:ch211-145g9.7 [Source:NCBI gene;Acc:101883934]	Clone-based (Ensembl) gene	lincRNA
chr1	51802535	51803604	-	LL0000003087		BX548032.2		Clone-based (Ensembl) gene	antisense
chr1	51827046	51829291	+	LL0000008667	ZDB-GENE-040421-2	dand5	DAN domain family, member 5	ZFIN	protein_coding
chr1	51869067	51876874	-	LL0000003086		BX548032.1		Clone-based (Ensembl) gene	processed_transcript
chr1	51874334	51961715	+	LL0000017053		LOC110437879	nuclear factor 1 X-type-like	GCF_000002035.6_GRCz11	protein_coding
chr1	51874334	51961732	+	LL0000020262	ZDB-GENE-080722-15	nfixa	nuclear factor I/Xa	ZFIN	protein_coding
chr1	52048831	52106497	+	LL0000015597		LOC103909284	nuclear factor 1 X-type	GCF_000002035.6_GRCz11	protein_coding
chr1	52111025	52128425	-	LL0000023126	ZDB-GENE-040808-59	rad23aa	RAD23 homolog A, nucleotide excision repair protein a	ZFIN	protein_coding
chr1	52121918	52167509	-	LL0000003586		BX901942.2		Clone-based (Ensembl) gene	protein_coding
chr1	52130164	52137313	+	LL0000023758	ZDB-GENE-040426-1277	rnf11a	ring finger protein 11a	ZFIN	protein_coding
chr1	52137392	52138257	-	LL0000003585		BX901942.1		Clone-based (Ensembl) gene	antisense
chr1	52137528	52153102	+	LL0000001490		asna1	arsA arsenite transporter, ATP-binding, homolog 1 (bacterial) [Source:ZFIN;Acc:ZDB-GENE-040625-120]	ZFIN	protein_coding
chr1	52161947	52173816	+	LL0000001876	ZDB-GENE-090312-127	best2	bestrophin 2	ZFIN	protein_coding
chr1	52176592	52201543	-	LL0000023066	ZDB-GENE-080722-14	rab3da	RAB3D, member RAS oncogene family, a	ZFIN	protein_coding
chr1	52203009	52210950	-	LL0000022095	ZDB-GENE-030131-3825	pld6	phospholipase D family, member 6	ZFIN	protein_coding
chr1	52212911	52222989	-	LL0000005898	ZDB-GENE-090312-141	cnn1a	calponin 1, basic, smooth muscle, a	ZFIN	protein_coding
chr1	52263439	52292656	-	LL0000026707	ZDB-GENE-090312-176	si:dkey-121b10.7	si:dkey-121b10.7	ZFIN	protein_coding
chr1	52335500	52352791	+	LL0000032280		XLOC_000666		Cufflinks; see BLAST hits		moderate confidence,XP_021333688.1,LOC108185957,mucin-2-like	no Blast hit
chr1	52342795	52363107	+	LL0000013769		LO017718.1		Clone-based (Ensembl) gene	lincRNA
chr1	52364636	52371912	+	LL0000032281		XLOC_000667		Cufflinks; see BLAST hits		high confidence,XP_021333688.1,LOC108185957,mucin-2-like	no Blast hit
chr1	52392511	52396264	+	LL0000025608	ZDB-GENE-031010-46	si:ch211-217k17.8	si:ch211-217k17.8	ZFIN	protein_coding
chr1	52398077	52400667	+	LL0000025609	ZDB-GENE-061207-21	si:ch211-217k17.9	si:ch211-217k17.9	ZFIN	protein_coding
chr1	52429810	52431220	-	LL0000039097	ZDB-GENE-080723-68	zgc:194101	zgc:194101	ZFIN	protein_coding
chr1	52433847	52437056	-	LL0000025606	ZDB-GENE-061207-20	si:ch211-217k17.12	si:ch211-217k17.12	ZFIN	protein_coding
chr1	52441080	52443379	-	LL0000025605	ZDB-GENE-030131-8636	si:ch211-217k17.11	si:ch211-217k17.11	ZFIN	protein_coding
chr1	52446149	52447364	-	LL0000025604	ZDB-GENE-030131-8827	si:ch211-217k17.10	si:ch211-217k17.10	ZFIN	protein_coding
chr1	52452010	52461322	-	LL0000025607	ZDB-GENE-061009-11	si:ch211-217k17.7	si:ch211-217k17.7	ZFIN	protein_coding
chr1	52462056	52478833	+	LL0000011357	ZDB-GENE-050410-9	glb1	galactosidase, beta 1	ZFIN	protein_coding
chr1	52481332	52486995	+	LL0000005781	ZDB-GENE-040808-4	cldnd1b	claudin domain containing 1b	ZFIN	protein_coding
chr1	52489962	52498146	-	LL0000000252	ZDB-GENE-040718-37	acy3.2	aspartoacylase (aminocyclase) 3, tandem duplicate 2	ZFIN	protein_coding
chr1	52495043	52513634	+	LL0000002667		BX323839.1	uncharacterized LOC108190353 [Source:NCBI gene;Acc:108190353]	Clone-based (Ensembl) gene	antisense
chr1	52495095	52513634	+	LL0000016816		LOC108190353	uncharacterized LOC108190353,non-coding	GCF_000002035.6_GRCz11	lincRNA
chr1	52499412	52505279	-	LL0000000251	ZDB-GENE-040718-345	acy3.1	aspartoacylase (aminocyclase) 3, tandem duplicate 1	ZFIN	protein_coding
chr1	52518176	52538517	+	LL0000029909	ZDB-GENE-061207-19	tacr3l	tachykinin receptor 3-like	ZFIN	protein_coding
chr1	52560549	52628407	+	LL0000000027	ZDB-GENE-031006-12	abca1a	ATP-binding cassette, sub-family A (ABC1), member 1A	ZFIN	protein_coding
chr1	52630910	52630981	+	LL0000032282		XLOC_000674		Cufflinks; see BLAST hits		low confidence,XP_002665106.3,nod1,nucleotide-binding oligomerization domain containing 1	low confidence,NP_002528.1,OAZ2,ornithine decarboxylase antizyme 2 isoform 1
chr1	52632856	52653608	+	LL0000028772	ZDB-GENE-050417-204	slc44a1a	solute carrier family 44 member 1a	ZFIN	protein_coding
chr1	52653617	52659711	-	LL0000001207	ZDB-GENE-040628-2	aptx	aprataxin	ZFIN	protein_coding
chr1	52662203	52703696	+	LL0000021082	ZDB-GENE-090312-18	osbp	oxysterol binding protein	ZFIN	protein_coding
chr1	52711370	52714514	+	LL0000018120		LOC558721	uncharacterized LOC558721	GCF_000002035.6_GRCz11	protein_coding
chr1	52734098	52736444	+	LL0000004028		CABZ01021532.1	uncharacterized LOC108179086 [Source:NCBI gene;Acc:108179086]	Clone-based (Ensembl) gene	protein_coding
chr1	52736533	52736592	-	LL0000032388		XLOC_001586		Cufflinks; see BLAST hits		low confidence,NP_001082989.1,mfsd4b,major facilitator superfamily domain containing 4B	no Blast hit
chr1	52744616	52745427	+	LL0000014287		LOC100535525	uncharacterized LOC100535525	GCF_000002035.6_GRCz11	protein_coding
chr1	52754085	52763447	+	LL0000032144	ZDB-GENE-030131-4139	wu:fc75a09	wu:fc75a09	ZFIN	protein_coding
chr1	52763979	52790782	-	LL0000021312	ZDB-GENE-070209-83	patl1	PAT1 homolog 1, processing body mRNA decay factor	ZFIN	protein_coding
chr1	52792439	52820954	+	LL0000028946	ZDB-GENE-021125-1	smarca5	SWI/SNF related, matrix associated, actin dependent regulator of chromatin, subfamily a, member 5	ZFIN	protein_coding
chr1	52929185	53225121	+	LL0000012769	ZDB-GENE-090312-97	inpp4b	inositol polyphosphate-4-phosphatase type II B	ZFIN	protein_coding
chr1	53221858	53271128	+	LL0000003828		BX957281.1		Clone-based (Ensembl) gene	protein_coding
chr1	53234693	53260082	+	LL0000012650	ZDB-GENE-060213-2	il15	interleukin 15	ZFIN	protein_coding
chr1	53266504	53277660	-	LL0000039583	ZDB-GENE-040426-2697	znf330	zinc finger protein 330	ZFIN	protein_coding
chr1	53279799	53302400	+	LL0000023778	ZDB-GENE-060213-1	rnf150a	ring finger protein 150a	ZFIN	protein_coding
chr1	53302549	53305257	+	LL0000032283		XLOC_000686		Cufflinks; see BLAST hits		no Blast hit	no Blast hit
chr1	53364510	53368034	+	LL0000000758		AL935166.1		Clone-based (Ensembl) gene	processed_transcript
chr1	53374454	53388914	+	LL0000031553	ZDB-GENE-010503-1	ucp1	uncoupling protein 1	ZFIN	protein_coding
chr1	53391345	53415290	-	LL0000009570	ZDB-GENE-060824-2	elmod2	ELMO/CED-12 domain containing 2	ZFIN	protein_coding
chr1	53414042	53447060	+	LL0000017889		LOC110439888	uncharacterized LOC110439888,non-coding	GCF_000002035.6_GRCz11	lincRNA
chr1	53447111	53449086	+	LL0000032284		XLOC_000690		Cufflinks; see BLAST hits		low confidence,XP_021323685.1,si:ch211-66k16.2,si:ch211-66k16.2	no Blast hit
chr1	53454741	53468160	-	LL0000039212	ZDB-GENE-040426-1642	zgc:66455	zgc:66455	ZFIN	protein_coding
chr1	53474381	53486008	-	LL0000001726	ZDB-GENE-090312-192	b3gnt2a	UDP-GlcNAc:betaGal beta-1,3-N-acetylglucosaminyltransferase 2a	ZFIN	protein_coding
chr1	53490125	53504607	-	LL0000006040	ZDB-GENE-060512-329	commd1	copper metabolism (Murr1) domain containing 1	ZFIN	protein_coding
chr1	53517601	53519153	+	LL0000017814		LOC110439714	uncharacterized LOC110439714,non-coding	GCF_000002035.6_GRCz11	lincRNA
chr1	53520406	53535565	+	LL0000025560	ZDB-GENE-090313-82	si:ch211-213b8.4	si:ch211-213b8.4	ZFIN	protein_coding
chr1	53522002	53525646	+	LL0000017943		LOC110439958	protocadherin Fat 1-like	GCF_000002035.6_GRCz11	protein_coding
chr1	53540504	53565907	+	LL0000015478		LOC103908636	protocadherin Fat 3-like	GCF_000002035.6_GRCz11	protein_coding
chr1	53566166	53654443	-	LL0000031718		USP34	ubiquitin specific peptidase 34 [Source:NCBI gene;Acc:562779]	HGNC symbol	protein_coding
chr1	53656235	53685132	-	LL0000038216	ZDB-GENE-050309-201	xpo1a	exportin 1 (CRM1 homolog, yeast) a	ZFIN	protein_coding
chr1	53685524	53701743	-	LL0000010004	ZDB-GENE-110310-1	fam161a	FAM161 centrosomal protein A	ZFIN	protein_coding
chr1	53686328	53686664	+	LL0000032285		XLOC_000693		Cufflinks; see BLAST hits		no Blast hit	no Blast hit
chr1	53701801	53714885	-	LL0000005212	ZDB-GENE-040426-1421	cct4	chaperonin containing TCP1, subunit 4 (delta)	ZFIN	protein_coding
chr1	53714734	53730536	+	LL0000022941	ZDB-GENE-080204-5	pus10	pseudouridine synthase 10	ZFIN	protein_coding
chr1	53731974	53756905	-	LL0000000559	ZDB-GENE-110309-3	akt3b	v-akt murine thymoma viral oncogene homolog 3b	ZFIN	protein_coding
chr1	53782094	53785161	+	LL0000032286		XLOC_000695		Cufflinks; see BLAST hits		low confidence,XP_021322720.1,LOC110438007,fap1 adhesin-like	no Blast hit
chr1	53786458	53791062	+	LL0000014361		LOC100536887	uncharacterized LOC100536887	GCF_000002035.6_GRCz11	protein_coding
chr1	53792310	53793748	-	LL0000032389		XLOC_001600		Cufflinks; see BLAST hits		high confidence,XP_021323077.1,cuzd1.1,CUB and zona pellucida-like domains 1, tandem duplicate 1	low confidence,XP_016864593.1,TMEM161B,transmembrane protein 161B isoform X12
chr1	53794617	53796806	-	LL0000032390		XLOC_001601		Cufflinks; see BLAST hits		high confidence,XP_021323077.1,cuzd1.1,CUB and zona pellucida-like domains 1, tandem duplicate 1	moderate confidence,NP_001128360.1,RTL1,retrotransposon-like protein 1
chr1	53806685	53812076	-	LL0000032391		XLOC_001602		Cufflinks; see BLAST hits		low confidence,XP_002667598.5,LOC100334014,prolyl endopeptidase-like	low confidence,NP_001355092.1,SMIM28,small integral membrane protein 28
chr1	53816754	53821410	-	LL0000032392		XLOC_001603		Cufflinks; see BLAST hits		low confidence,XP_003200160.3,LOC100332535,uncharacterized LOC100332535	no Blast hit
chr1	53842344	53863926	+	LL0000012500	ZDB-GENE-081022-158	ifngr1	interferon gamma receptor 1	ZFIN	protein_coding
chr1	53865478	53880664	-	LL0000018453	ZDB-GENE-040712-1	ltv1	LTV1 ribosome biogenesis factor	ZFIN	protein_coding
chr1	53881844	53907092	-	LL0000004889	ZDB-GENE-010724-2	capn9	calpain 9	ZFIN	protein_coding
chr1	53910397	53911704	+	LL0000014755		LOC101883618	uncharacterized protein PF11_0213-like	GCF_000002035.6_GRCz11	protein_coding
chr1	53911834	53918839	-	LL0000029927	ZDB-GENE-030131-5987	taf5l	TAF5-like RNA polymerase II, p300/CBP-associated factor (PCAF)-associated factor	ZFIN	protein_coding
chr1	53919110	53941991	+	LL0000020747	ZDB-GENE-040426-2941	nup133	nucleoporin 133	ZFIN	protein_coding
chr1	53945934	53953532	+	LL0000000216	ZDB-GENE-050417-267	acta1a	actin alpha 1, skeletal muscle a	ZFIN	protein_coding
chr1	53954230	53966145	+	LL0000005205	ZDB-GENE-111116-1	ccsapa	centriole, cilia and spindle-associated protein a	ZFIN	protein_coding
chr1	53973147	53988142	-	LL0000023667		RHOU (1 of many)	si:ch211-133l11.10 [Source:ZFIN;Acc:ZDB-GENE-141219-14]	HGNC symbol	protein_coding
chr1	54013457	54026352	+	LL0000008966	ZDB-GENE-980526-29	dla	deltaA	ZFIN	protein_coding
chr1	54017703	54043788	-	LL0000000692		AL929114.1		Clone-based (Ensembl) gene	antisense
chr1	54031439	54062114	+	LL0000031134	ZDB-GENE-110411-40	triobpa	TRIO and F-actin binding protein a	ZFIN	protein_coding
chr1	54062510	54063520	-	LL0000028973	ZDB-GENE-141212-9	smdt1b	single-pass membrane protein with aspartate-rich tail 1b	ZFIN	protein_coding
chr1	54065611	54068428	-	LL0000000693		AL929114.2		Clone-based (Ensembl) gene	processed_transcript
chr1	54069435	54084742	+	LL0000008702	ZDB-GENE-030131-2374	dcaf15	DDB1 and CUL4 associated factor 15	ZFIN	protein_coding
chr1	54086322	54111511	-	LL0000023577	ZDB-GENE-041008-101	rfx1b	regulatory factor X, 1b (influences HLA class II expression)	ZFIN	protein_coding
chr1	54115839	54118344	+	LL0000023725	ZDB-GENE-090527-3	rln3b	relaxin 3b	ZFIN	protein_coding
chr1	54124209	54126428	+	LL0000013771		LO017722.1	TRANSPORTIN 2 KARYOPHERIN BETA 2B	Clone-based (Ensembl) gene	protein_coding
chr1	54152601	54174035	-	LL0000004317		CABZ01067151.1	NA + /H + EXCHANGE REGULATORY COFACTOR NHE NHERF REGULATORY SODIUM HYDROGEN EXCHANGER REGULATORY FACTOR SOLUTE CARRIER FAMILY 9 A3 REGULATORY FACTOR 1	Clone-based (Ensembl) gene	protein_coding
chr1	54159959	54173322	-	LL0000004318		CABZ01067151.2		Clone-based (Ensembl) gene	lincRNA
chr1	54178703	54191626	-	LL0000020682	ZDB-GENE-120511-4	nthl1	nth-like DNA glycosylase 1	ZFIN	protein_coding
chr1	54194801	54199090	+	LL0000004316		CABZ01067150.1	RAL GTPASE ACTIVATING SUBUNIT ALPHA	Clone-based (Ensembl) gene	protein_coding
chr1	54198893	54274861	+	LL0000031211	ZDB-GENE-030131-2702	tsc2	TSC complex subunit 2	ZFIN	protein_coding
chr1	54282042	54425791	-	LL0000022011	ZDB-GENE-100707-1	pkd1a	polycystic kidney disease 1a	ZFIN	protein_coding
chr1	54411669	54420133	-	LL0000004117		CABZ01043826.1		Clone-based (Ensembl) gene	protein_coding
chr1	54455932	54490521	+	LL0000017890		LOC110439889	somatostatin receptor type 5-like	GCF_000002035.6_GRCz11	protein_coding
chr1	54491231	54497948	+	LL0000032287		XLOC_000711		Cufflinks; see BLAST hits		no Blast hit	no Blast hit
chr1	54501087	54502716	+	LL0000032288		XLOC_000712		Cufflinks; see BLAST hits		no Blast hit	no Blast hit
chr1	54541316	54549919	-	LL0000032163	ZDB-GENE-030131-7470	wu:fj19g03	wu:fj19g03	ZFIN	protein_coding
chr1	54601233	54608474	+	LL0000025475	ZDB-GENE-110914-121	si:ch211-202h22.10	si:ch211-202h22.10	ZFIN	protein_coding
chr1	54613730	54622227	-	LL0000030147	ZDB-GENE-070410-98	tekt4	tektin 4	ZFIN	protein_coding
chr1	54626491	54637378	+	LL0000025478	ZDB-GENE-030131-1143	si:ch211-202h22.9	si:ch211-202h22.9	ZFIN	protein_coding
chr1	54638126	54648766	+	LL0000025477	ZDB-GENE-090313-78	si:ch211-202h22.8	si:ch211-202h22.8	ZFIN	protein_coding
chr1	54649581	54662318	+	LL0000025476	ZDB-GENE-090313-77	si:ch211-202h22.7	si:ch211-202h22.7	ZFIN	protein_coding
chr1	54673766	54680675	+	LL0000011658	ZDB-GENE-090313-75	gprc5bb	G protein-coupled receptor, class C, group 5, member Bb	ZFIN	protein_coding
chr1	54683617	54696140	+	LL0000013437	ZDB-GENE-090313-76	knop1	lysine-rich nucleolar protein 1	ZFIN	protein_coding
chr1	54698182	54706074	-	LL0000009879	ZDB-GENE-080926-3	exosc1	exosome component 1	ZFIN	protein_coding
chr1	54707662	54718903	-	LL0000021647	ZDB-GENE-030131-5376	pgam1b	phosphoglycerate mutase 1b	ZFIN	protein_coding
chr1	54720906	54735567	-	LL0000005277	ZDB-GENE-090313-74	cdc25d	cell division cycle 25 homolog d	ZFIN	protein_coding
chr1	54737353	54755556	+	LL0000021747	ZDB-GENE-040426-2675	pi4k2a	phosphatidylinositol 4-kinase type 2 alpha	ZFIN	protein_coding
chr1	54755517	54772650	-	LL0000025427	ZDB-GENE-110914-193	si:ch211-197k17.3	si:ch211-197k17.3	ZFIN	protein_coding
chr1	54766855	54785185	+	LL0000020404	ZDB-GENE-060421-8264	nlrc6	NLR family CARD domain containing 6	ZFIN	protein_coding
chr1	54789203	54862598	+	LL0000018124		LOC559196	NACHT	GCF_000002035.6_GRCz11	protein_coding
chr1	54834119	54861588	+	LL0000025410	ZDB-GENE-081029-1	si:ch211-196h16.4	si:ch211-196h16.4	ZFIN	protein_coding
chr1	54865513	54889501	+	LL0000025411	ZDB-GENE-081029-8	si:ch211-196h16.5	si:ch211-196h16.5	ZFIN	protein_coding
chr1	54889727	54907825	+	LL0000038432	ZDB-GENE-061013-502	zfyve27	zinc finger, FYVE domain containing 27	ZFIN	protein_coding
chr1	54908895	54931917	+	LL0000011506	ZDB-GENE-050417-14	golga7ba	golgin A7 family, member Ba	ZFIN	protein_coding
chr1	54933190	54947618	-	LL0000007340	ZDB-GENE-030131-9704	crtac1a	cartilage acidic protein 1a	ZFIN	protein_coding
chr1	54948059	54958463	+	LL0000023007	ZDB-GENE-030131-4156	r3hcc1l	R3H domain and coiled-coil containing 1-like	ZFIN	protein_coding
chr1	54960189	54972236	-	LL0000013273	ZDB-GENE-030131-4357	khsrp	KH-type splicing regulatory protein	ZFIN	protein_coding
chr1	54974121	54997746	-	LL0000028598	ZDB-GENE-121214-154	slc25a23a	solute carrier family 25 member 23a	ZFIN	protein_coding
chr1	55002583	55007223	+	LL0000025409	ZDB-GENE-121214-351	si:ch211-196h16.12	si:ch211-196h16.12	ZFIN	protein_coding
chr1	55006945	55044371	-	LL0000031905	ZDB-GENE-081022-176	vps54	VPS54 subunit of GARP complex	ZFIN	protein_coding
chr1	55007272	55008890	-	LL0000038677	ZDB-GENE-060331-129	zgc:136864	zgc:136864	ZFIN	protein_coding
chr1	55044658	55068992	-	LL0000021589	ZDB-GENE-110310-6	peli1a	pellino E3 ubiquitin protein ligase 1a	ZFIN	protein_coding
chr1	55080797	55090717	+	LL0000013627	ZDB-GENE-060616-24	lgalsla	lectin, galactoside-binding-like a	ZFIN	protein_coding
chr1	55095285	55110990	+	LL0000000447	ZDB-GENE-030131-1437	aftpha	aftiphilin a	ZFIN	protein_coding
chr1	55112609	55118745	-	LL0000024520	ZDB-GENE-050309-236	sertad2a	SERTA domain containing 2a	ZFIN	protein_coding
chr1	55122012	55131584	-	LL0000023032	ZDB-GENE-090312-110	rab1aa	RAB1A, member RAS oncogene family a	ZFIN	protein_coding
chr1	55137862	55145090	+	LL0000018715	ZDB-GENE-040426-1430	mb	myoglobin	ZFIN	protein_coding
chr1	55161083	55166611	-	LL0000021244	ZDB-GENE-040611-4	pane1	proliferation associated nuclear element	ZFIN	protein_coding
chr1	55168977	55183146	-	LL0000038814	ZDB-GENE-070424-15	zgc:158803	zgc:158803	ZFIN	protein_coding
chr1	55184775	55210750	-	LL0000019521	ZDB-GENE-080204-109	mri1	methylthioribose-1-phosphate isomerase 1	ZFIN	protein_coding
chr1	55211713	55212390	-	LL0000032393		XLOC_001632		Cufflinks; see BLAST hits		low confidence,XP_005174272.1,si:ch1073-385f13.3,si:ch1073-385f13.3	no Blast hit
chr1	55212616	55213023	-	LL0000032394		XLOC_001633		Cufflinks; see BLAST hits		no Blast hit	no Blast hit
chr1	55215304	55239293	-	LL0000005009		CC2D1A	coiled-coil and C2 domain containing 1A [Source:NCBI gene;Acc:100001297]	HGNC symbol	protein_coding
chr1	55239160	55247253	+	LL0000026020	ZDB-GENE-121214-251	si:ch211-286b5.2	si:ch211-286b5.2	ZFIN	protein_coding
chr1	55247370	55248496	-	LL0000019974	ZDB-GENE-011221-1	nanos3	nanos homolog 3	ZFIN	protein_coding
chr1	55250107	55263740	-	LL0000026021	ZDB-GENE-121214-140	si:ch211-286b5.4	si:ch211-286b5.4	ZFIN	protein_coding
chr1	55264025	55270966	-	LL0000026022	ZDB-GENE-121214-209	si:ch211-286b5.5	si:ch211-286b5.5	ZFIN	protein_coding
chr1	55264712	55275813	+	LL0000002481		BX284640.1		Clone-based (Ensembl) gene	protein_coding
chr1	55279124	55287260	+	LL0000026023	ZDB-GENE-121214-216	si:ch211-286b5.6	si:ch211-286b5.6	ZFIN	protein_coding
chr1	55293408	55301205	+	LL0000038971	ZDB-GENE-080204-42	zgc:172106	zgc:172106	ZFIN	protein_coding
chr1	55304374	55312610	+	LL0000026024	ZDB-GENE-121214-73	si:ch211-286b5.8	si:ch211-286b5.8	ZFIN	protein_coding
chr1	55313756	55341722	+	LL0000014745		LOC101883549	uncharacterized LOC101883549	GCF_000002035.6_GRCz11	protein_coding
chr1	55337216	55338672	-	LL0000032395		XLOC_001638		Cufflinks; see BLAST hits		moderate confidence,XP_021331018.1,LOC110439387,gastrula zinc finger protein XlCGF28.1-like	low confidence,NP_001295.2,CPD,carboxypeptidase D isoform 1 precursor
chr1	55348381	55353978	+	LL0000026025	ZDB-GENE-121214-63	si:ch211-286b5.9	si:ch211-286b5.9	ZFIN	protein_coding
chr1	55359262	55368996	+	LL0000014928		LOC101884507	sialoadhesin-like	GCF_000002035.6_GRCz11	protein_coding
chr1	55369366	55369957	+	LL0000017892		LOC110439892	uncharacterized LOC110439892,non-coding	GCF_000002035.6_GRCz11	lincRNA
chr1	55379936	55392269	+	LL0000015620		LOC103909416	B-cell receptor CD22-like	GCF_000002035.6_GRCz11	protein_coding
chr1	55392385	55393074	+	LL0000015606		LOC103909373	uncharacterized LOC103909373,non-coding	GCF_000002035.6_GRCz11	lincRNA
chr1	55397177	55405052	+	LL0000017944		LOC110439959	uncharacterized LOC110439959	GCF_000002035.6_GRCz11	protein_coding
chr1	55406059	55407428	+	LL0000014942		LOC101884568	uncharacterized LOC101884568,non-coding	GCF_000002035.6_GRCz11	lincRNA
chr1	55428437	55433296	+	LL0000015622		LOC103909419	sialoadhesin-like	GCF_000002035.6_GRCz11	protein_coding
chr1	55443280	55444094	+	LL0000017893		LOC110439893	uncharacterized LOC110439893,non-coding	GCF_000002035.6_GRCz11	lincRNA
chr1	55449943	55453752	+	LL0000006927		CR788255.1		Clone-based (Ensembl) gene	protein_coding
chr1	55453972	55454924	+	LL0000016785		LOC108186185	Fc receptor-like protein 5	GCF_000002035.6_GRCz11	protein_coding
chr1	55456212	55456802	+	LL0000016825		LOC108190423	uncharacterized LOC108190423,non-coding	GCF_000002035.6_GRCz11	lincRNA
chr1	55476002	55477135	+	LL0000028062	ZDB-GENE-121214-321	si:dkey-9c18.3	si:dkey-9c18.3	ZFIN	protein_coding
chr1	55478543	55518252	+	LL0000000350	ZDB-GENE-121214-61	adgre9	adhesion G protein-coupled receptor E9	ZFIN	protein_coding
chr1	55519015	55527751	+	LL0000017891		LOC110439891	pancreatic secretory granule membrane major glycoprotein GP2-like	GCF_000002035.6_GRCz11	protein_coding
chr1	55535827	55542745	+	LL0000000342	ZDB-GENE-121214-46	adgre16	adhesion G protein-coupled receptor E16	ZFIN	protein_coding
chr1	55554435	55556398	+	LL0000017894		LOC110439894	uncharacterized LOC110439894,non-coding	GCF_000002035.6_GRCz11	lincRNA
chr1	55563025	55574438	+	LL0000000341	ZDB-GENE-121214-33	adgre15	adhesion G protein-coupled receptor E15	ZFIN	protein_coding
chr1	55583116	55587666	+	LL0000000344	ZDB-GENE-121214-34	adgre19	adhesion G protein-coupled receptor E19	ZFIN	protein_coding
chr1	55600504	55606573	+	LL0000031612	ZDB-GENE-121214-192	umod	uromodulin	ZFIN	protein_coding
chr1	55614941	55616274	+	LL0000014821		LOC101883942	adhesion G protein-coupled receptor E3-like	GCF_000002035.6_GRCz11	protein_coding
chr1	55616310	55616890	+	LL0000016826		LOC108190441	uncharacterized LOC108190441,non-coding	GCF_000002035.6_GRCz11	lincRNA
chr1	55643186	55668623	+	LL0000015614		LOC103909395	adhesion G protein-coupled receptor E3-like	GCF_000002035.6_GRCz11	protein_coding
chr1	55643198	55646413	+	LL0000000348	ZDB-GENE-121214-45	adgre7	adhesion G protein-coupled receptor E7	ZFIN	protein_coding
chr1	55662491	55668390	+	LL0000000349	ZDB-GENE-121214-35	adgre8	adhesion G protein-coupled receptor E8	ZFIN	protein_coding
chr1	55665932	55666456	+	LL0000017895		LOC110439895	adhesion G protein-coupled receptor E3-like	GCF_000002035.6_GRCz11	protein_coding
chr1	55685981	55687227	-	LL0000032396		XLOC_001639		Cufflinks; see BLAST hits		high confidence,XP_021333208.1,adgre15,adhesion G protein-coupled receptor E15, transcript variant X3	low confidence,NP_001276087.1,ADGRE3,adhesion G protein-coupled receptor E3 isoform 2 precursor
chr1	55686285	55687459	+	LL0000015613		LOC103909390	adhesion G protein-coupled receptor E3-like	GCF_000002035.6_GRCz11	protein_coding
chr1	55687720	55688290	+	LL0000017896		LOC110439896	putative adhesion G protein-coupled receptor E4P	GCF_000002035.6_GRCz11	protein_coding
chr1	55698769	55706975	+	LL0000014363		LOC100536910	adhesion G protein-coupled receptor E1	GCF_000002035.6_GRCz11	protein_coding
chr1	55707023	55714177	+	LL0000015612		LOC103909389	adhesion G protein-coupled receptor E3-like	GCF_000002035.6_GRCz11	protein_coding
chr1	55717553	55721056	+	LL0000015611		LOC103909388	uncharacterized LOC103909388,non-coding	GCF_000002035.6_GRCz11	lincRNA
chr1	55723870	55728458	+	LL0000000343	ZDB-GENE-090313-151	adgre17	adhesion G protein-coupled receptor E17	ZFIN	protein_coding
chr1	55730205	55747003	+	LL0000000338	ZDB-GENE-090313-152	adgre10	adhesion G protein-coupled receptor E10	ZFIN	protein_coding
chr1	55734864	55750322	-	LL0000009050	ZDB-GENE-030131-5455	dnajb1b	DnaJ heat shock protein family (Hsp40) member B1b	ZFIN	protein_coding
chr1	55752643	55777267	+	LL0000030134	ZDB-GENE-030131-5154	tecrb	trans-2,3-enoyl-CoA reductase b	ZFIN	protein_coding
chr1	55763229	55766229	+	LL0000014857		LOC101884156	uncharacterized LOC101884156,non-coding	GCF_000002035.6_GRCz11	lincRNA
chr1	55780128	55785722	-	LL0000020142	ZDB-GENE-040426-1886	ndufb7	NADH:ubiquinone oxidoreductase subunit B7	ZFIN	protein_coding
chr1	55786986	55810730	-	LL0000038681	ZDB-GENE-060312-22	zgc:136908	zgc:136908	ZFIN	protein_coding
chr1	55816121	55840405	-	LL0000024182	ZDB-GENE-090313-2	samd1b	sterile alpha motif domain containing 1b	ZFIN	protein_coding
chr1	55843552	55873272	-	LL0000022570	ZDB-GENE-040801-208	prkacab	protein kinase, cAMP-dependent, catalytic, alpha, genome duplicate b	ZFIN	protein_coding
chr1	55878113	55888970	-	LL0000001475	ZDB-GENE-040426-2594	asf1bb	anti-silencing function 1Bb histone chaperone	ZFIN	protein_coding
chr1	55891376	55896332	-	LL0000026480	ZDB-GENE-090313-159	si:ch73-343l4.8	si:ch73-343l4.8	ZFIN	protein_coding
chr1	55899234	55899905	-	LL0000015618		LOC103909412	uncharacterized LOC103909412,non-coding	GCF_000002035.6_GRCz11	lincRNA
chr1	55903808	55922977	-	LL0000026479	ZDB-GENE-090313-158	si:ch73-343l4.6	si:ch73-343l4.6	ZFIN	protein_coding
chr1	55908572	55919463	-	LL0000026478	ZDB-GENE-090313-157	si:ch73-343l4.5	si:ch73-343l4.5	ZFIN	protein_coding
chr1	55925810	55930414	-	LL0000026477	ZDB-GENE-090313-155	si:ch73-343l4.3	si:ch73-343l4.3	ZFIN	protein_coding
chr1	55938565	55942055	-	LL0000026476	ZDB-GENE-090313-154	si:ch73-343l4.2	si:ch73-343l4.2	ZFIN	protein_coding
chr1	55947389	55947671	-	LL0000026475	ZDB-GENE-090313-153	si:ch73-343l4.1	si:ch73-343l4.1	ZFIN	protein_coding
chr1	55997173	56032871	-	LL0000003918	ZDB-GENE-140822-3	c3a.4	complement component c3a, duplicate 4	ZFIN	protein_coding
chr1	56036644	56080165	-	LL0000003920	ZDB-GENE-041212-2	c3a.6	complement component c3a, duplicate 6	ZFIN	protein_coding
chr1	56081871	56129549	-	LL0000003919	ZDB-GENE-090311-30	c3a.5	complement component c3a, duplicate 5	ZFIN	protein_coding
chr1	56130222	56176976	-	LL0000003915	ZDB-GENE-990415-35	c3a.1	complement component c3a, duplicate 1	ZFIN	protein_coding
chr1	56180416	56184928	+	LL0000007278	ZDB-GENE-060610-3	crb3b	crumbs homolog 3b	ZFIN	protein_coding
chr1	56187832	56213876	-	LL0000027870	ZDB-GENE-090313-329	si:dkey-76b14.2	si:dkey-76b14.2	ZFIN	protein_coding
chr1	56217388	56223913	-	LL0000039196	ZDB-GENE-030131-7741	zgc:65894	zgc:65894	ZFIN	protein_coding
chr1	56229657	56266731	+	LL0000003916	ZDB-GENE-990415-36	c3a.2	complement component c3a, duplicate 2	ZFIN	protein_coding
chr1	56274613	56320572	+	LL0000003917	ZDB-GENE-990415-37	c3a.3	complement component c3a, duplicate 3	ZFIN	protein_coding
chr1	56339751	56341869	-	LL0000032397		XLOC_001661		Cufflinks; see BLAST hits		moderate confidence,NP_001106978.1,il23r,interleukin 23 receptor	low confidence,XP_024303437.1,SECISBP2,selenocysteine insertion sequence-binding protein 2 isoform X9
chr1	56341970	56363440	-	LL0000011209	ZDB-GENE-050516-2	gcgrb	glucagon receptor b	ZFIN	protein_coding
chr1	56363884	56363974	-	LL0000019298	ZDB-MIRNAG-090929-299	mir722	microRNA 722	ZFIN	miRNA
chr1	56413733	56419277	-	LL0000010555		FO905027.1	UNCHARACTERIZED	Clone-based (Ensembl) gene	protein_coding
chr1	56415988	56421915	-	LL0000017946		LOC110439963	GTPase IMAP family member 4-like	GCF_000002035.6_GRCz11	protein_coding
chr1	56421754	56435434	-	LL0000028581	ZDB-GENE-040426-1095	slc25a10	solute carrier family 25 member 10	ZFIN	protein_coding
chr1	56441100	56442192	-	LL0000032398		XLOC_001666		Cufflinks; see BLAST hits		no Blast hit	low confidence,NP_001306126.1,S100A8,protein S100-A8 isoform b
chr1	56443249	56475715	+	LL0000004236		CABZ01059392.1	uncharacterized LOC100334305 [Source:NCBI gene;Acc:100334305]	Clone-based (Ensembl) gene	protein_coding
chr1	56443249	56445497	-	LL0000014210		LOC100334365	claudin-9-like	GCF_000002035.6_GRCz11	protein_coding
chr1	56463494	56468601	+	LL0000038909	ZDB-GENE-071004-84	zgc:171452	zgc:171452	ZFIN	protein_coding
chr1	56502706	56529192	+	LL0000004237		CABZ01059403.1	UNCHARACTERIZED	Clone-based (Ensembl) gene	protein_coding
chr1	56528004	56542080	-	LL0000004238		CABZ01059406.1	AMBIGUOUS	Clone-based (Ensembl) gene	protein_coding
chr1	56546605	56551429	-	LL0000004239		CABZ01059407.1	UNCHARACTERIZED	Clone-based (Ensembl) gene	protein_coding
chr1	56553900	56558229	-	LL0000004240		CABZ01059408.1	UNCHARACTERIZED	Clone-based (Ensembl) gene	protein_coding
chr1	56561160	56562552	-	LL0000032399		XLOC_001672		Cufflinks; see BLAST hits		low confidence,XP_009292205.2,LOC100329768,G-protein coupled receptor 20-like	no Blast hit
chr1	56562816	56567440	-	LL0000014441		LOC100538177	uncharacterized protein DDB_G0290685-like	GCF_000002035.6_GRCz11	protein_coding
chr1	56562816	56567503	-	LL0000032400		XLOC_001673		Cufflinks; see BLAST hits		high confidence,XP_021333260.1,LOC100538177,uncharacterized protein DDB_G0290685-like, transcript variant X5	low confidence,XP_016866550.1,DUSP22,dual specificity protein phosphatase 22 isoform X1
chr1	56570348	56576181	-	LL0000032121	ZDB-GENE-030131-6721	wu:fa03e10	wu:fa03e10	ZFIN	protein_coding
chr1	56595802	56600153	-	LL0000013878		LO018605.1	UNCHARACTERIZED	Clone-based (Ensembl) gene	protein_coding
chr1	56605868	56606010	-	LL0000032401		XLOC_001676		Cufflinks; see BLAST hits		low confidence,XP_021333254.1,LOC100538177,uncharacterized protein DDB_G0290685-like, transcript variant X3	low confidence,XP_011529033.1,PPP6R2,serine/threonine-protein phosphatase 6 regulatory subunit 2 isoform X13
chr1	56624969	56645732	-	LL0000013879		LO018605.2		Clone-based (Ensembl) gene	lincRNA
chr1	56658328	56665243	-	LL0000039340	ZDB-GENE-130530-909	zmp:0000000906	zmp:0000000906	ZFIN	protein_coding
chr1	56669039	56697555	-	LL0000013880		LO018605.3		Clone-based (Ensembl) gene	lincRNA
chr1	56707035	56710714	+	LL0000014035		LOC100151165	GTPase IMAP family member 8-like	GCF_000002035.6_GRCz11	protein_coding
chr1	56714284	56728319	-	LL0000010464		FO681314.1	UNCHARACTERIZED	Clone-based (Ensembl) gene	protein_coding
chr1	56719258	56728417	+	LL0000015789		LOC103910127	uncharacterized LOC103910127,non-coding	GCF_000002035.6_GRCz11	lincRNA
chr1	56719556	56728324	-	LL0000013991		LOC100148237	GTPase IMAP family member 4-like	GCF_000002035.6_GRCz11	protein_coding
chr1	56722225	56728417	+	LL0000017897		LOC110439898	uncharacterized LOC110439898	GCF_000002035.6_GRCz11	protein_coding
chr1	56741358	56746804	-	LL0000014016		LOC100149931	GTPase IMAP family member 8-like	GCF_000002035.6_GRCz11	protein_coding
chr1	56755536	56760851	+	LL0000004161		CABZ01049361.1	GTPase IMAP family member 4-like [Source:NCBI gene;Acc:100149227]	Clone-based (Ensembl) gene	protein_coding
chr1	56763593	56766279	+	LL0000017950		LOC110439968	GTPase IMAP family member 4-like	GCF_000002035.6_GRCz11	protein_coding
chr1	56767866	56774501	+	LL0000004162		CABZ01049362.1	UNCHARACTERIZED	Clone-based (Ensembl) gene	protein_coding
chr1	56781166	56784799	+	LL0000017951		LOC110439970	GTPase IMAP family member 2-like	GCF_000002035.6_GRCz11	protein_coding
chr1	56785091	56790339	+	LL0000017955		LOC110439974	GTPase IMAP family member 8-like	GCF_000002035.6_GRCz11	protein_coding
chr1	56794154	56794925	-	LL0000015471		LOC101887163	uncharacterized LOC101887163,non-coding	GCF_000002035.6_GRCz11	lincRNA
chr1	56801021	56805426	+	LL0000025459	ZDB-GENE-121214-89	si:ch211-1f22.3	si:ch211-1f22.3	ZFIN	protein_coding
chr1	56813845	57180904	+	LL0000027483	ZDB-GENE-121214-157	si:dkey-27j5.6	si:dkey-27j5.6	ZFIN	protein_coding
chr1	56823437	56829703	+	LL0000025460	ZDB-GENE-121214-105	si:ch211-1f22.5	si:ch211-1f22.5	ZFIN	protein_coding
chr1	56829776	56830433	+	LL0000017956		LOC110439975	B-cell receptor CD22-like	GCF_000002035.6_GRCz11	protein_coding
chr1	56830798	56834002	+	LL0000003659		BX927068.1		Clone-based (Ensembl) gene	lincRNA
chr1	56843098	56846916	+	LL0000025158	ZDB-GENE-121214-70	si:ch211-152f2.1	si:ch211-152f2.1	ZFIN	protein_coding
chr1	56852400	56857465	+	LL0000025461	ZDB-GENE-121214-119	si:ch211-1f22.6	si:ch211-1f22.6	ZFIN	protein_coding
chr1	56858463	56872198	+	LL0000017898		LOC110439899	uncharacterized LOC110439899,non-coding	GCF_000002035.6_GRCz11	lincRNA
chr1	56859759	56862690	+	LL0000015626		LOC103909437	uncharacterized LOC103909437,non-coding	GCF_000002035.6_GRCz11	lincRNA
chr1	56872821	56883858	+	LL0000025159	ZDB-GENE-121214-75	si:ch211-152f2.2	si:ch211-152f2.2	ZFIN	protein_coding
chr1	56885965	56899734	+	LL0000025462	ZDB-GENE-121214-83	si:ch211-1f22.8	si:ch211-1f22.8	ZFIN	protein_coding
chr1	56900580	56905169	+	LL0000025160	ZDB-GENE-121214-85	si:ch211-152f2.3	si:ch211-152f2.3	ZFIN	protein_coding
chr1	56919653	56925024	+	LL0000025463	ZDB-GENE-121214-139	si:ch211-1f22.9	si:ch211-1f22.9	ZFIN	protein_coding
chr1	56925178	56927767	+	LL0000032289		XLOC_000787		Cufflinks; see BLAST hits		low confidence,XP_021328859.1,grid1a,glutamate receptor, ionotropic, delta 1a, transcript variant X4	no Blast hit
chr1	56929787	56936939	+	LL0000025161	ZDB-GENE-121214-86	si:ch211-152f2.4	si:ch211-152f2.4	ZFIN	protein_coding
chr1	56939346	56940148	-	LL0000032402		XLOC_001683		Cufflinks; see BLAST hits		high confidence,XP_001332092.1,rac1l,ras-related C3 botulinum toxin substrate 1 (rho family, small GTP binding protein Rac1) like	high confidence,NP_008839.2,RAC1,ras-related C3 botulinum toxin substrate 1 isoform Rac1
chr1	56943492	56948694	-	LL0000025452	ZDB-GENE-121214-79	si:ch211-1f22.1	si:ch211-1f22.1	ZFIN	protein_coding
chr1	56950043	56953638	-	LL0000025458	ZDB-GENE-121214-149	si:ch211-1f22.2	si:ch211-1f22.2	ZFIN	protein_coding
chr1	56955349	56960028	+	LL0000025453	ZDB-GENE-121214-82	si:ch211-1f22.10	si:ch211-1f22.10	ZFIN	protein_coding
chr1	56972616	56981691	+	LL0000025454	ZDB-GENE-121214-66	si:ch211-1f22.11	si:ch211-1f22.11	ZFIN	protein_coding
chr1	56987333	56989054	+	LL0000016835		LOC108190564	uncharacterized LOC108190564,non-coding	GCF_000002035.6_GRCz11	lincRNA
chr1	56992298	56995828	+	LL0000017901		LOC110439903	carcinoembryonic antigen-related cell adhesion molecule 5-like	GCF_000002035.6_GRCz11	protein_coding
chr1	56995878	56999567	+	LL0000025455	ZDB-GENE-121214-103	si:ch211-1f22.12	si:ch211-1f22.12	ZFIN	protein_coding
chr1	56997075	56998933	-	LL0000032403		XLOC_001686		Cufflinks; see BLAST hits		high confidence,XP_021333311.1,si:ch211-1f22.12,si:ch211-1f22.12	low confidence,NP_001172029.1,CD22,B-cell receptor CD22 isoform 3 precursor
chr1	57004178	57008386	+	LL0000025456	ZDB-GENE-121214-68	si:ch211-1f22.13	si:ch211-1f22.13	ZFIN	protein_coding
chr1	57013640	57016780	+	LL0000006764		CR626902.1		Clone-based (Ensembl) gene	lincRNA
chr1	57041549	57092043	+	LL0000025457	ZDB-GENE-121214-59	si:ch211-1f22.16	si:ch211-1f22.16	ZFIN	protein_coding
chr1	57041694	57043687	+	LL0000017962		LOC110439985	B-cell receptor CD22-like	GCF_000002035.6_GRCz11	protein_coding
chr1	57044477	57045514	+	LL0000015629		LOC103909443	uncharacterized LOC103909443,non-coding	GCF_000002035.6_GRCz11	lincRNA
chr1	57054746	57058690	+	LL0000017963		LOC110439986	B-cell receptor CD22-like	GCF_000002035.6_GRCz11	protein_coding
chr1	57059364	57062214	+	LL0000017909		LOC110439914	sialic acid-binding Ig-like lectin 12	GCF_000002035.6_GRCz11	protein_coding
chr1	57081477	57087402	+	LL0000017964		LOC110439987	B-cell receptor CD22-like	GCF_000002035.6_GRCz11	protein_coding
chr1	57099649	57101165	+	LL0000015628		LOC103909442	sialic acid-binding Ig-like lectin 14	GCF_000002035.6_GRCz11	protein_coding
chr1	57111989	57112926	+	LL0000017965		LOC110439988	uncharacterized LOC110439988	GCF_000002035.6_GRCz11	protein_coding
chr1	57114057	57115758	+	LL0000016836		LOC108190565	uncharacterized LOC108190565,non-coding	GCF_000002035.6_GRCz11	lincRNA
chr1	57116268	57120505	+	LL0000026595	ZDB-GENE-121214-110	si:ch73-94k4.1	si:ch73-94k4.1	ZFIN	protein_coding
chr1	57128562	57174193	-	LL0000023114	ZDB-GENE-060315-6	rac1l	Rac family small GTPase 1, like	ZFIN	protein_coding
chr1	57132140	57236167	+	LL0000027480	ZDB-GENE-121214-151	si:dkey-27j5.10	si:dkey-27j5.10	ZFIN	protein_coding
chr1	57144248	57187814	+	LL0000017913		LOC110439919	uncharacterized LOC110439919,non-coding	GCF_000002035.6_GRCz11	lincRNA
chr1	57145072	57145503	+	LL0000026596	ZDB-GENE-121214-228	si:ch73-94k4.4	si:ch73-94k4.4	ZFIN	protein_coding
chr1	57151926	57160654	+	LL0000026597	ZDB-GENE-121214-94	si:ch73-94k4.5	si:ch73-94k4.5	ZFIN	protein_coding
chr1	57168646	57169827	-	LL0000018206		LOC793648
chr1	57176241	57185961	+	LL0000015627		LOC103909439	B-cell receptor CD22-like	GCF_000002035.6_GRCz11	protein_coding
chr1	57187794	57195815	+	LL0000027486	ZDB-GENE-121214-296	si:dkey-27j5.9	si:dkey-27j5.9	ZFIN	protein_coding
chr1	57188166	57195809	+	LL0000014641		LOC101882982	B-cell receptor CD22-like	GCF_000002035.6_GRCz11	protein_coding
chr1	57198387	57202346	+	LL0000027481	ZDB-GENE-121214-127	si:dkey-27j5.11	si:dkey-27j5.11	ZFIN	protein_coding
chr1	57198406	57202563	+	LL0000016834		LOC108190563	carcinoembryonic antigen-related cell adhesion molecule 6-like	GCF_000002035.6_GRCz11	protein_coding
chr1	57202668	57205574	+	LL0000016786		LOC108186582	B-cell receptor CD22-like	GCF_000002035.6_GRCz11	protein_coding
chr1	57208037	57215682	+	LL0000014009		LOC100149247	B-cell receptor CD22-like	GCF_000002035.6_GRCz11	protein_coding
chr1	57218204	57240244	+	LL0000027485	ZDB-GENE-121214-156	si:dkey-27j5.8	si:dkey-27j5.8	ZFIN	protein_coding
chr1	57223849	57224284	+	LL0000017919		LOC110439928	uncharacterized LOC110439928,non-coding	GCF_000002035.6_GRCz11	lincRNA
chr1	57235896	57238464	+	LL0000027484	ZDB-GENE-121214-123	si:dkey-27j5.7	si:dkey-27j5.7	ZFIN	protein_coding
chr1	57269441	57318940	+	LL0000019809	ZDB-GENE-080923-1	mycbpap	mycbp associated protein	ZFIN	protein_coding
chr1	57276973	57280811	-	LL0000027482	ZDB-GENE-121214-264	si:dkey-27j5.5	si:dkey-27j5.5	ZFIN	protein_coding
chr1	57319971	57343765	+	LL0000009730	ZDB-GENE-121214-173	epn3b	epsin 3b	ZFIN	protein_coding
chr1	57344576	57345995	+	LL0000032290		XLOC_000809		Cufflinks; see BLAST hits		no Blast hit	no Blast hit
chr1	57347675	57365506	+	LL0000001738	ZDB-GENE-050913-133	b3gntl1	UDP-GlcNAc:betaGal beta-1,3-N-acetylglucosaminyltransferase-like 1	ZFIN	protein_coding
chr1	57370894	57383581	+	LL0000018893	ZDB-GENE-121214-223	metrnlb	meteorin like, glial cell differentiation regulator b	ZFIN	protein_coding
chr1	57413082	57413911	-	LL0000016850		LOC108190693	uncharacterized LOC108190693,non-coding	GCF_000002035.6_GRCz11	lincRNA
chr1	57421901	57443415	-	LL0000013962		LOC100006649	Schwann cell myelin protein-like	GCF_000002035.6_GRCz11	protein_coding
chr1	57452787	57454654	-	LL0000013987		LOC100147925	B-cell receptor CD22-like	GCF_000002035.6_GRCz11	protein_coding
chr1	57461349	57467233	-	LL0000015635		LOC103909461	sialoadhesin-like	GCF_000002035.6_GRCz11	protein_coding
chr1	57467639	57483875	-	LL0000039347	ZDB-GENE-130530-974	zmp:0000000971	zmp:0000000971	ZFIN	protein_coding
chr1	57497959	57501299	-	LL0000038911	ZDB-GENE-080204-4	zgc:171470	zgc:171470	ZFIN	protein_coding
chr1	57502743	57505697	-	LL0000032404		XLOC_001700		Cufflinks; see BLAST hits		low confidence,NP_001003597.1,mnd1,meiotic nuclear divisions 1 homolog (S. cerevisiae)	no Blast hit
chr1	57506766	57514861	-	LL0000015486		LOC103908692	B-cell receptor CD22-like	GCF_000002035.6_GRCz11	protein_coding
chr1	57506766	57516645	-	LL0000032405		XLOC_001701		Cufflinks; see BLAST hits		no Blast hit	no Blast hit
chr1	57521361	57533548	+	LL0000031250	ZDB-GENE-060825-202	tspan34	tetraspanin 34	ZFIN	protein_coding
chr1	57537758	57540680	+	LL0000014740		LOC101883531	B-cell receptor CD22-like	GCF_000002035.6_GRCz11	protein_coding
chr1	57546908	57548213	+	LL0000017815		LOC110439716	B-cell receptor CD22-like	GCF_000002035.6_GRCz11	protein_coding
chr1	57559302	57560357	+	LL0000017966		LOC110439989	B-cell receptor CD22-like	GCF_000002035.6_GRCz11	protein_coding
chr1	57567460	57585366	-	LL0000017920		LOC110439930	B-cell receptor CD22-like	GCF_000002035.6_GRCz11	protein_coding
chr1	57585424	57586797	-	LL0000014364		LOC100536927	B-cell receptor CD22-like	GCF_000002035.6_GRCz11	protein_coding
chr1	57589934	57594029	-	LL0000015636		LOC103909463	B-cell receptor CD22-like	GCF_000002035.6_GRCz11	protein_coding
chr1	57593992	57596569	-	LL0000014170		LOC100333168	B-cell receptor CD22-like	GCF_000002035.6_GRCz11	protein_coding
chr1	57611626	57614800	+	LL0000014176		LOC100333244	B-cell receptor CD22-like	GCF_000002035.6_GRCz11	protein_coding
chr1	57620964	57629666	-	LL0000039374	ZDB-GENE-140106-249	zmp:0000001289	zmp:0000001289	ZFIN	protein_coding
chr1	57634322	57636326	-	LL0000014656		LOC101883054	uncharacterized LOC101883054	GCF_000002035.6_GRCz11	protein_coding
chr1	57639106	57643750	-	LL0000032406		XLOC_001707		Cufflinks; see BLAST hits		high confidence,XP_021333417.1,zmp:0000001289,zmp:0000001289	moderate confidence,XP_011525292.1,CEACAM6,carcinoembryonic antigen-related cell adhesion molecule 6 isoform X1
chr1	57645177	57649370	+	LL0000032291		XLOC_000817		Cufflinks; see BLAST hits		high confidence,XP_005158326.1,clasp1b,cytoplasmic linker associated protein 1b	moderate confidence,NP_001128360.1,RTL1,retrotransposon-like protein 1
chr1	57651955	57660757	-	LL0000014824		LOC101883960	B-cell receptor CD22-like	GCF_000002035.6_GRCz11	protein_coding
chr1	57664566	57668256	-	LL0000024244	ZDB-GENE-080327-4	sc:d0284	sc:d0284	ZFIN	protein_coding
chr1	57670108	57683570	+	LL0000017967		LOC110439990	uncharacterized LOC110439990	GCF_000002035.6_GRCz11	protein_coding
chr1	57698447	57701748	+	LL0000015174		LOC101885706	CMRF35-like molecule 3	GCF_000002035.6_GRCz11	protein_coding
chr1	57709395	57710016	+	LL0000017968		LOC110439991	CMRF35-like molecule 3	GCF_000002035.6_GRCz11	protein_coding
chr1	57710298	57712248	+	LL0000015190		LOC101885769	uncharacterized LOC101885769,non-coding	GCF_000002035.6_GRCz11	lincRNA
chr1	57717917	57720225	+	LL0000017921		LOC110439933	uncharacterized LOC110439933,non-coding	GCF_000002035.6_GRCz11	lincRNA
chr1	57724157	57763348	+	LL0000027029	ZDB-GENE-121214-246	si:dkey-1c7.1	si:dkey-1c7.1	ZFIN	protein_coding
chr1	57741577	57743393	+	LL0000013875		LO018597.1	HIGH AFFINITY IMMUNOGLOBULIN ALPHA AND IMMUNOGLOBULIN MU FC RECEPTOR PRECURSOR FC ALPHA/MU RECEPTOR CD351 ANTIGEN	Clone-based (Ensembl) gene	protein_coding
chr1	57744400	57750367	+	LL0000013876		LO018597.2	HIGH AFFINITY IMMUNOGLOBULIN ALPHA AND IMMUNOGLOBULIN MU FC RECEPTOR PRECURSOR FC ALPHA/MU RECEPTOR CD351 ANTIGEN	Clone-based (Ensembl) gene	protein_coding
chr1	57774454	57794376	+	LL0000027030	ZDB-GENE-121214-214	si:dkey-1c7.2	si:dkey-1c7.2	ZFIN	protein_coding
chr1	57794888	57799451	+	LL0000032292		XLOC_000828		Cufflinks; see BLAST hits		high confidence,XP_009293901.1,LOC101882159,polymeric immunoglobulin receptor-like, transcript variant X2	moderate confidence,NP_001276011.1,CD300LF,CMRF35-like molecule 1 isoform 2
chr1	57794888	57799451	+	LL0000014480		LOC101882159	polymeric immunoglobulin receptor-like	GCF_000002035.6_GRCz11	protein_coding
chr1	57800301	57807367	+	LL0000014490		LOC101882213	CMRF35-like molecule 8	GCF_000002035.6_GRCz11	protein_coding
chr1	57816194	57819011	+	LL0000017969		LOC110439992	polymeric immunoglobulin receptor-like	GCF_000002035.6_GRCz11	protein_coding
chr1	57823266	57824638	+	LL0000016290		LOC108179133	polymeric immunoglobulin receptor-like	GCF_000002035.6_GRCz11	protein_coding
chr1	57831922	57839070	-	LL0000027031	ZDB-GENE-121214-189	si:dkey-1c7.3	si:dkey-1c7.3	ZFIN	protein_coding
chr1	57843387	57845840	+	LL0000014520		LOC101882350	polymeric immunoglobulin receptor-like	GCF_000002035.6_GRCz11	protein_coding
chr1	57882227	57883399	+	LL0000014801		LOC101883825	polymeric immunoglobulin receptor-like	GCF_000002035.6_GRCz11	protein_coding
chr1	57885854	57888403	+	LL0000017816		LOC110439728	uncharacterized LOC110439728,non-coding	GCF_000002035.6_GRCz11	lincRNA
chr1	57927489	57931592	+	LL0000002779		BX469930.1		Clone-based (Ensembl) gene	lincRNA
chr1	57964728	57980061	+	LL0000026792	ZDB-GENE-121213-8	si:dkey-156m2.3	si:dkey-156m2.3	ZFIN	protein_coding
chr1	57981823	57991025	+	LL0000024953	ZDB-GENE-120215-211	si:ch211-114l13.12	si:ch211-114l13.12	ZFIN	protein_coding
chr1	57997133	58003391	-	LL0000024958	ZDB-GENE-070424-116	si:ch211-114l13.9	si:ch211-114l13.9	ZFIN	protein_coding
chr1	58003615	58017364	+	LL0000002780		BX469930.2		Clone-based (Ensembl) gene	antisense
chr1	58004151	58009277	-	LL0000020779	ZDB-GENE-070424-115	nxnl1	nucleoredoxin like 1	ZFIN	protein_coding
chr1	58011104	58036706	-	LL0000006037		COLGALT1 (1 of many)	si:ch211-114l13.7 [Source:ZFIN;Acc:ZDB-GENE-070424-114]	HGNC symbol	protein_coding
chr1	58014831	58036443	-	LL0000024957	ZDB-GENE-070424-114	si:ch211-114l13.7	si:ch211-114l13.7	ZFIN	protein_coding
chr1	58039551	58049515	+	LL0000031084	ZDB-GENE-050522-17	trim35-1	tripartite motif containing 35-1	ZFIN	protein_coding
chr1	58050905	58064738	-	LL0000004940	ZDB-GENE-020812-1	caspb	caspase b	ZFIN	protein_coding
chr1	58066109	58076716	+	LL0000024956	ZDB-GENE-070424-113	si:ch211-114l13.4	si:ch211-114l13.4	ZFIN	protein_coding
chr1	58079043	58156179	+	LL0000024954	ZDB-GENE-120215-237	si:ch211-114l13.13	si:ch211-114l13.13	ZFIN	protein_coding
chr1	58079053	58088949	+	LL0000024955	ZDB-GENE-070424-112	si:ch211-114l13.3	si:ch211-114l13.3	ZFIN	protein_coding
chr1	58091640	58103125	+	LL0000024952	ZDB-GENE-070424-109	si:ch211-114l13.1	si:ch211-114l13.1	ZFIN	protein_coding
chr1	58105742	58115334	-	LL0000004941	ZDB-GENE-090311-53	caspbl	caspase b, like	ZFIN	protein_coding
chr1	58116900	58132015	+	LL0000025214	ZDB-GENE-081031-11	si:ch211-15j1.5	si:ch211-15j1.5	ZFIN	protein_coding
chr1	58137020	58146106	+	LL0000025213	ZDB-GENE-081031-6	si:ch211-15j1.4	si:ch211-15j1.4	ZFIN	protein_coding
chr1	58150000	58155977	+	LL0000025212	ZDB-GENE-081031-24	si:ch211-15j1.3	si:ch211-15j1.3	ZFIN	protein_coding
chr1	58158117	58179885	+	LL0000015476		LOC103908614	protein NLRC3-like	GCF_000002035.6_GRCz11	protein_coding
chr1	58160151	58173589	+	LL0000003707		BX927298.1		Clone-based (Ensembl) gene	unprocessed_pseudogene
chr1	58175977	58176858	+	LL0000016783		LOC108184853	NLR family CARD domain-containing protein 3-like	GCF_000002035.6_GRCz11	protein_coding
chr1	58176023	58179756	+	LL0000025215	ZDB-GENE-120214-34	si:ch211-15j1.7	si:ch211-15j1.7	ZFIN	protein_coding
chr1	58182400	58187215	+	LL0000025211	ZDB-GENE-081031-25	si:ch211-15j1.1	si:ch211-15j1.1	ZFIN	protein_coding
chr1	58194226	58198182	+	LL0000027174	ZDB-GENE-081031-32	si:dkey-222h21.11	si:dkey-222h21.11	ZFIN	protein_coding
chr1	58205494	58216219	+	LL0000027175	ZDB-GENE-090312-33	si:dkey-222h21.12	si:dkey-222h21.12	ZFIN	protein_coding
chr1	58219638	58466934	+	LL0000027173	ZDB-GENE-081031-22	si:dkey-222h21.10	si:dkey-222h21.10	ZFIN	protein_coding
chr1	58228492	58238120	+	LL0000027183	ZDB-GENE-081031-10	si:dkey-222h21.9	si:dkey-222h21.9	ZFIN	protein_coding
chr1	58240877	58241867	+	LL0000016787		LOC108186899	NLR family CARD domain-containing protein 3-like	GCF_000002035.6_GRCz11	protein_coding
chr1	58242498	58257899	+	LL0000011297	ZDB-GENE-090312-37	ggt1l2.2	gamma-glutamyltransferase 1 like 2.2	ZFIN	protein_coding
chr1	58260886	58268514	+	LL0000027182	ZDB-GENE-081031-103	si:dkey-222h21.8	si:dkey-222h21.8	ZFIN	protein_coding
chr1	58272023	58358323	+	LL0000027176	ZDB-GENE-081031-20	si:dkey-222h21.2	si:dkey-222h21.2	ZFIN	protein_coding
chr1	58277038	58278378	-	LL0000032407		XLOC_001717		Cufflinks; see BLAST hits		low confidence,XP_005158636.1,ptk2ba,protein tyrosine kinase 2 beta, a, transcript variant X3	no Blast hit
chr1	58282449	58286669	+	LL0000027181	ZDB-GENE-081031-33	si:dkey-222h21.7	si:dkey-222h21.7	ZFIN	protein_coding
chr1	58290000	58297989	+	LL0000027180	ZDB-GENE-081031-15	si:dkey-222h21.6	si:dkey-222h21.6	ZFIN	protein_coding
chr1	58302300	58304161	+	LL0000017924		LOC110439936	uncharacterized LOC110439936,non-coding	GCF_000002035.6_GRCz11	lincRNA
chr1	58304301	58309702	+	LL0000027179	ZDB-GENE-081031-19	si:dkey-222h21.5	si:dkey-222h21.5	ZFIN	protein_coding
chr1	58312727	58317030	+	LL0000027178	ZDB-GENE-081031-28	si:dkey-222h21.4	si:dkey-222h21.4	ZFIN	protein_coding
chr1	58323957	58327308	+	LL0000027177	ZDB-GENE-081031-31	si:dkey-222h21.3	si:dkey-222h21.3	ZFIN	protein_coding
chr1	58332000	58346871	+	LL0000011296	ZDB-GENE-090312-32	ggt1l2.1	gamma-glutamyltransferase 1 like 2.1	ZFIN	protein_coding
chr1	58334924	58337918	+	LL0000017970		LOC110439993	gamma-glutamyltransferase 5-like	GCF_000002035.6_GRCz11	protein_coding
chr1	58360106	58367845	+	LL0000027172	ZDB-GENE-081031-21	si:dkey-222h21.1	si:dkey-222h21.1	ZFIN	protein_coding
chr1	58370471	58371519	+	LL0000026344	ZDB-GENE-120215-43	si:ch73-236c18.1	si:ch73-236c18.1	ZFIN	protein_coding
chr1	58370526	58562256	-	LL0000028649	ZDB-GENE-061013-672	slc27a1b	solute carrier family 27 member 1b	ZFIN	protein_coding
chr1	58375307	58379111	+	LL0000017971		LOC110439994	gamma-glutamyltranspeptidase 1-like	GCF_000002035.6_GRCz11	protein_coding
chr1	58375871	58386128	+	LL0000008304		CU914631.1	GLUTATHIONE HYDROLASE 1 PROENZYME PRECURSOR EC_3.4.19.13 GAMMA GLUTAMYLTRANSFERASE 1 GAMMA GLUTAMYLTRANSPEPTIDASE 1 GGT 1 EC_2.3.2.- 2 LEUKOTRIENE C4 HYDROLASE EC_3.4.-.- 19 14 CD224 ANTIGEN [CONTAINS GLUTATHIONE HYDROLASE 1 HEAVY CHAIN; GLUTATHIONE HYDROLASE 1 LIGHT CHAIN]	Clone-based (Ensembl) gene	protein_coding
chr1	58380112	58388486	+	LL0000015644		LOC103909498	gamma-glutamyltranspeptidase 1-like	GCF_000002035.6_GRCz11	protein_coding
chr1	58400409	58416400	+	LL0000026568	ZDB-GENE-121214-48	si:ch73-59p9.2	si:ch73-59p9.2	ZFIN	protein_coding
chr1	58424507	58434252	+	LL0000026346	ZDB-GENE-121214-50	si:ch73-236c18.3	si:ch73-236c18.3	ZFIN	protein_coding
chr1	58456494	58460467	+	LL0000026347	ZDB-GENE-121213-7	si:ch73-236c18.5	si:ch73-236c18.5	ZFIN	protein_coding
chr1	58460860	58466918	+	LL0000026348	ZDB-GENE-121213-9	si:ch73-236c18.6	si:ch73-236c18.6	ZFIN	protein_coding
chr1	58460862	58465875	+	LL0000014202		LOC100334101	protein NLRC3-like	GCF_000002035.6_GRCz11	protein_coding
chr1	58470287	58687141	+	LL0000026349	ZDB-GENE-121214-3	si:ch73-236c18.7	si:ch73-236c18.7	ZFIN	protein_coding
chr1	58491504	58601636	-	LL0000026350	ZDB-GENE-121214-113	si:ch73-236c18.8	si:ch73-236c18.8	ZFIN	protein_coding
chr1	58508790	58613487	+	LL0000026351	ZDB-GENE-121214-125	si:ch73-236c18.9	si:ch73-236c18.9	ZFIN	protein_coding
chr1	58535306	58537356	+	LL0000038970	ZDB-GENE-080204-41	zgc:172091	zgc:172091	ZFIN	protein_coding
chr1	58563957	58665225	-	LL0000000347	ZDB-GENE-121214-275	adgre5b.3	adhesion G protein-coupled receptor E5b, duplicate 3	ZFIN	protein_coding
chr1	58575897	58584449	+	LL0000017806		LOC110439689	uncharacterized LOC110439689,non-coding	GCF_000002035.6_GRCz11	lincRNA
chr1	58580245	58593061	-	LL0000000346	ZDB-GENE-121214-277	adgre5b.2	adhesion G protein-coupled receptor E5b, duplicate 2	ZFIN	protein_coding
chr1	58601680	58606571	+	LL0000026321	ZDB-GENE-121214-41	si:ch73-221f6.1	si:ch73-221f6.1	ZFIN	protein_coding
chr1	58608962	58613331	+	LL0000039066	ZDB-GENE-080220-14	zgc:174928	zgc:174928	ZFIN	protein_coding
chr1	58613461	58618707	+	LL0000016859		LOC108190743	zinc finger protein 664-like	GCF_000002035.6_GRCz11	protein_coding
chr1	58613972	58618868	+	LL0000026322	ZDB-GENE-121214-21	si:ch73-221f6.3	si:ch73-221f6.3	ZFIN	protein_coding
chr1	58620953	58625610	+	LL0000039061	ZDB-GENE-030131-6213	zgc:174890	zgc:174890	ZFIN	protein_coding
chr1	58626788	58632123	+	LL0000026323	ZDB-GENE-121214-120	si:ch73-221f6.4	si:ch73-221f6.4	ZFIN	protein_coding
chr1	58646712	58669235	+	LL0000017807		LOC110439690	uncharacterized LOC110439690,non-coding	GCF_000002035.6_GRCz11	lincRNA
chr1	58676853	58681962	+	LL0000016857		LOC108190731	zinc finger protein 883-like	GCF_000002035.6_GRCz11	protein_coding
chr1	58677434	58681545	+	LL0000013775		LO017784.1	zinc finger protein 883-like [Source:NCBI gene;Acc:108190731]	Clone-based (Ensembl) gene	protein_coding
chr1	58682502	58685468	+	LL0000032293		XLOC_000879		Cufflinks; see BLAST hits		low confidence,XP_005170414.1,zgc:171435,zgc:171435, transcript variant X2	low confidence,NP_001275879.1,ASTE1,protein asteroid homolog 1 isoform 1
chr1	58687487	58688927	+	LL0000032294		XLOC_000880		Cufflinks; see BLAST hits		low confidence,XP_021335606.1,LOC101886098,Fc receptor-like protein 5, transcript variant X5	no Blast hit
chr1	58690565	58698223	-	LL0000000366	ZDB-GENE-130116-2	adgrl1.1	adhesion G protein-coupled receptor L1.1	ZFIN	protein_coding
chr1	58698983	58712942	+	LL0000032295		XLOC_000881		Cufflinks; see BLAST hits		exact match,XP_002660670.3,si:ch211-236p5.3,si:ch211-236p5.3, transcript variant X3	high confidence,XP_016878528.1,NLRC3,NLR family CARD domain-containing protein 3 isoform X4
chr1	58717396	58719948	+	LL0000015003		LOC101884874	stonustoxin subunit alpha-like	GCF_000002035.6_GRCz11	protein_coding
chr1	58725141	58761032	+	LL0000004560		CABZ01084617.1	ADHESION G COUPLED RECEPTOR L1 PRECURSOR CALCIUM INDEPENDENT ALPHA LATROTOXIN RECEPTOR 1 CIRL 1 LATROPHILIN 1	Clone-based (Ensembl) gene	protein_coding
chr1	58761266	58770396	-	LL0000004654		CABZ01096573.1	LATROPHILIN 1	Clone-based (Ensembl) gene	protein_coding
chr1	58771080	58778504	+	LL0000015027		LOC101884985	adhesion G protein-coupled receptor L1-like	GCF_000002035.6_GRCz11	protein_coding
chr1	58779744	58782116	+	LL0000032296		XLOC_000885		Cufflinks; see BLAST hits		low confidence,XP_021332399.1,cita,citron rho-interacting serine/threonine kinase a, transcript variant X2	low confidence,XP_011535984.1,PCYOX1L,prenylcysteine oxidase-like isoform X2
chr1	58801921	58805860	+	LL0000015655		LOC103909543	uncharacterized LOC103909543	GCF_000002035.6_GRCz11	protein_coding
chr1	58821393	58834120	-	LL0000016863		LOC108190761	tumor necrosis factor ligand superfamily member 14-like	GCF_000002035.6_GRCz11	protein_coding
chr1	58840870	58851681	+	LL0000030428	ZDB-GENE-070112-1112	tmed1b	transmembrane p24 trafficking protein 1b	ZFIN	protein_coding
chr1	58853360	58854377	-	LL0000032408		XLOC_001728		Cufflinks; see BLAST hits		no Blast hit	no Blast hit
chr1	58857088	58868306	-	LL0000009109	ZDB-GENE-040426-2371	dnm2b	dynamin 2b	ZFIN	protein_coding
chr1	58870054	58880613	-	LL0000004554		CABZ01084501.2	DYNAMIN 2 EC_3.6.5.5	Clone-based (Ensembl) gene	protein_coding
chr1	58885602	59142310	-	LL0000018924		MFAP4 (1 of many)	microfibril-associated glycoprotein 4-like [Source:NCBI gene;Acc:566119]	HGNC symbol	protein_coding
chr1	58898124	58900933	-	LL0000004555		CABZ01084501.3	microfibril-associated glycoprotein 4-like [Source:NCBI gene;Acc:100334800]	Clone-based (Ensembl) gene	protein_coding
chr1	58912051	58913813	-	LL0000038935	ZDB-GENE-071004-9	zgc:171687	zgc:171687	ZFIN	protein_coding
chr1	58919322	58921054	+	LL0000039368	ZDB-GENE-140106-132	zmp:0000001172	zmp:0000001172	ZFIN	protein_coding
chr1	58921625	58940964	+	LL0000031137	ZDB-GENE-040426-969	trip10b	thyroid hormone receptor interactor 10b	ZFIN	protein_coding
chr1	58936541	58941771	-	LL0000015299		LOC101886340	anoctamin-1-like	GCF_000002035.6_GRCz11	protein_coding
chr1	58946977	58947496	-	LL0000032409		XLOC_001733		Cufflinks; see BLAST hits		no Blast hit	no Blast hit
chr1	58947984	58948743	-	LL0000015309		LOC101886403	uncharacterized LOC101886403,non-coding	GCF_000002035.6_GRCz11	lincRNA
chr1	58948864	58965521	-	LL0000024616		SH2D3A	SH2 domain containing 3A [Source:NCBI gene;Acc:100331568]	HGNC symbol	protein_coding
chr1	58967210	58975098	-	LL0000004716		CABZ01114581.1	PROTO ONCOGENE VAV	Clone-based (Ensembl) gene	protein_coding
chr1	58977262	58979454	+	LL0000009782	ZDB-GENE-050522-292	eri2	ERI1 exoribonuclease family member 2	ZFIN	protein_coding
chr1	58981985	58985886	+	LL0000030296	ZDB-GENE-040426-1805	thumpd1	THUMP domain containing 1	ZFIN	protein_coding
chr1	58989936	59000239	+	LL0000004538		CABZ01083166.1	GENERAL TRANSCRIPTION FACTOR 3C POLYPEPTIDE 1 TF3C ALPHA TFIIIC BOX B BINDING SUBUNIT TRANSCRIPTION FACTOR IIIC 220 KDA SUBUNIT TFIIIC 220 KDA SUBUNIT TFIIIC220 TRANSCRIPTION FACTOR IIIC SUBUNIT ALPHA	Clone-based (Ensembl) gene	protein_coding
chr1	59000262	59000957	-	LL0000014636		LOC101882962	uncharacterized LOC101882962,non-coding	GCF_000002035.6_GRCz11	lincRNA
chr1	59001099	59001755	-	LL0000017808		LOC110439700	uncharacterized LOC110439700,non-coding	GCF_000002035.6_GRCz11	lincRNA
chr1	59002161	59004283	+	LL0000017972		LOC110439995	general transcription factor 3C polypeptide 1-like	GCF_000002035.6_GRCz11	protein_coding
chr1	59007318	59014359	+	LL0000005282	ZDB-GENE-040426-940	cdc37	cell division cycle 37 homolog (S. cerevisiae)	ZFIN	protein_coding
chr1	59015228	59021827	-	LL0000009339		EARS2	zgc:153247 [Source:ZFIN;Acc:ZDB-GENE-060825-214]	HGNC symbol	protein_coding
chr1	59033333	59038037	+	LL0000032297		XLOC_000895		Cufflinks; see BLAST hits		low confidence,XP_021326442.1,LOC101887189,uncharacterized LOC101887189	no Blast hit
chr1	59041298	59042153	-	LL0000014873		LOC101884216	uncharacterized LOC101884216,non-coding	GCF_000002035.6_GRCz11	lincRNA
chr1	59042506	59046616	-	LL0000032410		XLOC_001741		Cufflinks; see BLAST hits		low confidence,XP_017208200.1,adgrg11,adhesion G protein-coupled receptor G11, transcript variant X1	low confidence,NP_997247.2,GPR148,probable G-protein coupled receptor 148
chr1	59047529	59049683	-	LL0000032411		XLOC_001742		Cufflinks; see BLAST hits		high confidence,XP_017214605.1,LOC108192163,uncharacterized LOC108192163	no Blast hit
chr1	59050171	59053580	-	LL0000039222	ZDB-GENE-040426-1794	zgc:76872	zgc:76872	ZFIN	protein_coding
chr1	59054643	59055121	-	LL0000032412		XLOC_001744		Cufflinks; see BLAST hits		low confidence,XP_017207383.1,ugt5f1,UDP glucuronosyltransferase 5 family, polypeptide F1, transcript variant X1	no Blast hit
chr1	59057145	59058518	-	LL0000032413		XLOC_001745		Cufflinks; see BLAST hits		low confidence,XP_021326683.1,LOC110438488,uncharacterized LOC110438488	low confidence,NP_077268.1,UBL5,ubiquitin-like protein 5
chr1	59058643	59058981	-	LL0000032414		XLOC_001746		Cufflinks; see BLAST hits		no Blast hit	no Blast hit
chr1	59062603	59065948	+	LL0000021973	ZDB-GENE-040426-1714	pin1	peptidylprolyl cis/trans isomerase, NIMA-interacting 1	ZFIN	protein_coding
chr1	59064554	59077931	-	LL0000028382	ZDB-GENE-110408-35	si:zfos-2330d3.1	si:zfos-2330d3.1	ZFIN	protein_coding
chr1	59066698	59126139	-	LL0000024760	ZDB-GENE-121214-133	si:ch1073-110a20.7	si:ch1073-110a20.7	ZFIN	protein_coding
chr1	59073073	59074665	+	LL0000028383	ZDB-GENE-110408-14	si:zfos-2330d3.3	si:zfos-2330d3.3	ZFIN	protein_coding
chr1	59088187	59089598	+	LL0000039022	ZDB-GENE-071004-112	zgc:173915	zgc:173915	ZFIN	protein_coding
chr1	59090583	59092056	+	LL0000018923	ZDB-GENE-040426-2246	mfap4	microfibril associated protein 4	ZFIN	protein_coding
chr1	59094348	59096184	-	LL0000032160	ZDB-GENE-030131-7370	wu:fj11g02	wu:fj11g02	ZFIN	protein_coding
chr1	59100965	59104870	-	LL0000016304		LOC108179162	microfibril-associated glycoprotein 4-like	GCF_000002035.6_GRCz11	protein_coding
chr1	59107633	59116738	-	LL0000039377	ZDB-GENE-140106-283	zmp:0000001323	zmp:0000001323	ZFIN	protein_coding
chr1	59120417	59120616	+	LL0000032298		XLOC_000900		Cufflinks; see BLAST hits		low confidence,XP_002662346.1,si:dkey-34m19.3,si:dkey-34m19.3, transcript variant X1	low confidence,NP_803237.3,FAM171B,protein FAM171B precursor
chr1	59123750	59124505	-	LL0000010455		FO203432.1	MICROFIBRIL ASSOCIATED GLYCOPROTEIN 4 PRECURSOR	Clone-based (Ensembl) gene	protein_coding
chr1	59132849	59134780	-	LL0000024758	ZDB-GENE-121214-96	si:ch1073-110a20.2	si:ch1073-110a20.2	ZFIN	protein_coding
chr1	59135952	59139611	-	LL0000024759	ZDB-GENE-121214-100	si:ch1073-110a20.3	si:ch1073-110a20.3	ZFIN	protein_coding
chr1	59142783	59151058	+	LL0000011582	ZDB-GENE-121214-129	gpr108	G protein-coupled receptor 108	ZFIN	protein_coding
chr1	59142791	59146248	+	LL0000016788		LOC108187081	protein GPR108-like	GCF_000002035.6_GRCz11	protein_coding
chr1	59151157	59159031	+	LL0000029172	ZDB-GENE-121214-315	soul5l	heme-binding protein soul5, like	ZFIN	protein_coding
chr1	59163058	59169884	-	LL0000032171	ZDB-GENE-030131-7018	wu:fk65c09	wu:fk65c09	ZFIN	protein_coding
chr1	59171649	59188411	-	LL0000013974		LOC100007608	calmodulin-regulated spectrin-associated protein 3-like	GCF_000002035.6_GRCz11	protein_coding			same gene name at multiple loci
chr1	59191945	59216197	-	LL0000018286	ZDB-GENE-051120-99	lpar2b	lysophosphatidic acid receptor 2b	ZFIN	protein_coding
chr1	59218067	59237167	-	LL0000000543	ZDB-GENE-040426-2303	akap8l	A kinase (PRKA) anchor protein 8-like	ZFIN	protein_coding
chr1	59237328	59243542	-	LL0000019768	ZDB-GENE-040426-1240	mvb12a	multivesicular body subunit 12A	ZFIN	protein_coding
chr1	59244159	59251874	-	LL0000020863	ZDB-GENE-040426-2402	olfm2b	olfactomedin 2b	ZFIN	protein_coding
chr1	59252435	59287507	-	LL0000006019	ZDB-GENE-110728-4	col5a3b	collagen, type V, alpha 3b	ZFIN	protein_coding
chr1	59252435	59252973	-	LL0000024813	ZDB-GENE-121214-240	si:ch1073-286c18.5	si:ch1073-286c18.5	ZFIN	protein_coding
chr1	59272575	59303460	+	LL0000023373	ZDB-GENE-040426-1759	rdh8b	retinol dehydrogenase 8b	ZFIN	protein_coding
chr1	59304091	59313737	-	LL0000031404	ZDB-GENE-041008-112	txndc11	thioredoxin domain containing 11	ZFIN	protein_coding
chr1	59314675	59324540	+	LL0000021291	ZDB-GENE-040426-880	parn	poly(A)-specific ribonuclease (deadenylation nuclease)	ZFIN	protein_coding
chr1	59325740	59327347	-	LL0000016868		LOC108190785	uncharacterized LOC108190785,non-coding	GCF_000002035.6_GRCz11	lincRNA
chr1	59327540	59327793	+	LL0000032299		XLOC_000906		Cufflinks; see BLAST hits		no Blast hit	low confidence,XP_011522251.1,XAF1,XIAP-associated factor 1 isoform X5
chr1	59328003	59335940	+	LL0000004181		CABZ01052576.1	general transcription factor 3C polypeptide 1 [Source:NCBI gene;Acc:100535454]	Clone-based (Ensembl) gene	protein_coding
chr1	59338175	59348118	-	LL0000008605	ZDB-GENE-050604-1	cyp3a65	cytochrome P450, family 3, subfamily A, polypeptide 65	ZFIN	protein_coding
chr1	59353230	59370326	-	LL0000004180		CABZ01052573.1	MESOTHELIN PRECURSOR PRE PRO MEGAKARYOCYTE POTENTIATING FACTOR	Clone-based (Ensembl) gene	protein_coding
chr1	59357314	59401911	-	LL0000019647	ZDB-GENE-030131-7286	mslnb	mesothelin b	ZFIN	protein_coding
chr1	59395119	59402710	-	LL0000004179		CABZ01052570.1		Clone-based (Ensembl) gene	lincRNA
chr1	59405722	59511492	-	LL0000014095		LOC100330916	uncharacterized LOC100330916	GCF_000002035.6_GRCz11	protein_coding
chr1	59406243	59415948	-	LL0000025344	ZDB-GENE-121214-355	si:ch211-188p14.4	si:ch211-188p14.4	ZFIN	protein_coding
chr1	59406300	59407322	-	LL0000025345	ZDB-GENE-121214-312	si:ch211-188p14.5	si:ch211-188p14.5	ZFIN	protein_coding
chr1	59416186	59417949	-	LL0000025343	ZDB-GENE-121214-334	si:ch211-188p14.3	si:ch211-188p14.3	ZFIN	protein_coding
chr1	59419086	59422880	-	LL0000025342	ZDB-GENE-121214-329	si:ch211-188p14.2	si:ch211-188p14.2	ZFIN	protein_coding
chr1	59423277	59429240	-	LL0000010757		FP236157.4		Clone-based (Ensembl) gene	lincRNA
chr1	59430489	59434221	-	LL0000010759		FP236157.6		Clone-based (Ensembl) gene	lincRNA
chr1	59436255	59437599	-	LL0000010758		FP236157.5		Clone-based (Ensembl) gene	lincRNA
chr1	59451692	59481467	-	LL0000010761		FP236157.8		Clone-based (Ensembl) gene	lincRNA
chr1	59454067	59492590	-	LL0000010760		FP236157.7		Clone-based (Ensembl) gene	lincRNA
chr1	59499660	59500987	-	LL0000032415		XLOC_001767		Cufflinks; see BLAST hits		high confidence,XP_021326917.1,LOC110438578,mucin-5AC-like	no Blast hit
chr1	59501064	59502389	-	LL0000032416		XLOC_001768		Cufflinks; see BLAST hits		high confidence,XP_021326917.1,LOC110438578,mucin-5AC-like	no Blast hit
chr1	59520300	59522571	+	LL0000010754		FP236157.1		Clone-based (Ensembl) gene	lincRNA
chr1	59525238	59528626	-	LL0000010756		FP236157.3		Clone-based (Ensembl) gene	processed_transcript
chr1	59533317	59539899	+	LL0000029216	ZDB-GENE-040426-1824	sp6	Sp6 transcription factor	ZFIN	protein_coding
chr1	59542001	59542908	-	LL0000010755		FP236157.2		Clone-based (Ensembl) gene	lincRNA
chr1	59551890	59553936	-	LL0000032417		XLOC_001769		Cufflinks; see BLAST hits		low confidence,XP_021326220.1,LOC101882374,uncharacterized LOC101882374	no Blast hit
chr1	59551890	59553936	-	LL0000015666		LOC103909584	uncharacterized LOC103909584,non-coding	GCF_000002035.6_GRCz11	lincRNA
chr1	59555580	59568574	-	LL0000039360	ZDB-GENE-140106-42	zmp:0000001082	zmp:0000001082	ZFIN	protein_coding
chr1	59569491	59571785	-	LL0000032059	ZDB-GENE-040426-2465	wfikkn1	WAP, follistatin/kazal, immunoglobulin, kunitz and netrin domain containing 1	ZFIN	protein_coding
chr1	59577024	59577927	+	LL0000032300		XLOC_000910		Cufflinks; see BLAST hits		low confidence,XP_009304608.1,tmc8,transmembrane channel-like 8	low confidence,NP_001153836.1,TMC7,transmembrane channel-like protein 7 isoform b
chr10	1216	2768	-	LL0000032499		XLOC_002464		Cufflinks; see BLAST hits		low confidence,XP_021322046.1,phldb1b,pleckstrin homology-like domain, family B, member 1b, transcript variant X14	no Blast hit
chr10	6788	8552	-	LL0000032500		XLOC_002465		Cufflinks; see BLAST hits		no Blast hit	no Blast hit
chr10	15970	22780	+	LL0000030340	ZDB-GENE-040426-1611	tiprl	TIP41, TOR signaling pathway regulator-like (S. cerevisiae)	ZFIN	protein_coding
chr10	22423	28200	+	LL0000023706	ZDB-GENE-040426-1283	riox2	ribosomal oxygenase 2	ZFIN	protein_coding
chr10	28536	45486	-	LL0000004282		CABZ01064670.1		Clone-based (Ensembl) gene	lincRNA
chr10	53587	59192	-	LL0000012151	ZDB-GENE-030131-5333	hlcs	holocarboxylase synthetase (biotin-(proprionyl-CoA-carboxylase (ATP-hydrolysing)) ligase)	ZFIN	protein_coding
chr10	61603	76473	-	LL0000009318	ZDB-GENE-050302-29	dyrk1aa	dual-specificity tyrosine-(Y)-phosphorylation regulated kinase 1A, a	ZFIN	protein_coding
chr10	76876	81705	+	LL0000031885	ZDB-GENE-040801-6	vps26c	VPS26 endosomal protein sorting factor C	ZFIN	protein_coding
chr10	81808	110289	-	LL0000031298	ZDB-GENE-090313-3	ttc3	tetratricopeptide repeat domain 3	ZFIN	protein_coding
chr10	110868	116036	+	LL0000021778	ZDB-GENE-030131-4041	pigp	phosphatidylinositol glycan anchor biosynthesis, class P	ZFIN	protein_coding
chr10	116115	120580	-	LL0000023716	ZDB-GENE-060113-3	ripply3	ripply transcriptional repressor 3	ZFIN	protein_coding
chr10	121938	146740	-	LL0000013163		KCNJ6	potassium inwardly-rectifying channel, subfamily J, member 6 [Source:NCBI gene;Acc:569498]	HGNC symbol	protein_coding
chr10	156601	160390	+	LL0000013147		KCNJ15	potassium channel, inwardly rectifying subfamily J, member 15 [Source:NCBI gene;Acc:572476]	HGNC symbol	protein_coding
chr10	160340	175189	-	LL0000009775	ZDB-GENE-041212-40	erg	ETS transcription factor ERG	ZFIN	protein_coding
chr10	187760	197239	+	LL0000009836	ZDB-GENE-050522-552	ets2	v-ets avian erythroblastosis virus E26 oncogene homolog 2	ZFIN	protein_coding
chr10	206996	210703	-	LL0000022786	ZDB-GENE-040718-469	psmg1	proteasome (prosome, macropain) assembly chaperone 1	ZFIN	protein_coding
chr10	213878	228559	+	LL0000019510	ZDB-GENE-050417-455	mpzl1l	myelin protein zero-like 1 like	ZFIN	protein_coding
chr10	233138	263256	-	LL0000013407	ZDB-GENE-091118-66	klhl35	kelch-like family member 35	ZFIN	protein_coding
chr10	248304	258335	+	LL0000018362	ZDB-GENE-090630-1	lrrc32	leucine rich repeat containing 32	ZFIN	protein_coding
chr10	282601	302899	-	LL0000009627	ZDB-GENE-030131-7832	emsy	EMSY transcriptional repressor, BRCA2 interacting	ZFIN	protein_coding
chr10	303313	309946	-	LL0000020296		NHLRC3	NHL repeat containing 3 [Source:HGNC Symbol;Acc:HGNC:33751]	HGNC symbol	protein_coding
chr10	307849	309853	-	LL0000032167	ZDB-GENE-030131-7904	wu:fj39h09	wu:fj39h09	ZFIN	protein_coding
chr10	311676	322852	-	LL0000000557	ZDB-GENE-040121-5	akt2l	v-akt murine thymoma viral oncogene homolog 2, like	ZFIN	protein_coding
chr10	323400	342564	-	LL0000031806	ZDB-GENE-070424-68	vaspa	vasodilator stimulated phosphoprotein a	ZFIN	protein_coding
chr10	352577	375965	-	LL0000008388		CU929346.1	RHO ASSOCIATED KINASE EC_2.7.11.1 RHO ASSOCIATED COILED COIL CONTAINING KINASE RHO ASSOCIATED COILED COIL CONTAINING KINASE ROCK ROCK	Clone-based (Ensembl) gene	protein_coding
chr10	375042	382616	+	LL0000024818	ZDB-GENE-141216-327	si:ch1073-303d10.1	si:ch1073-303d10.1	ZFIN	protein_coding
chr10	386244	402773	+	LL0000025791	ZDB-GENE-091204-11	si:ch211-242f23.8	si:ch211-242f23.8	ZFIN	protein_coding
chr10	406026	421227	+	LL0000008661	ZDB-GENE-091204-226	dact3a	dishevelled-binding antagonist of beta-catenin 3a	ZFIN	protein_coding
chr10	422099	423865	+	LL0000032418		XLOC_001791		Cufflinks; see BLAST hits		low confidence,NP_001025454.1,ldlra,low density lipoprotein receptor a	no Blast hit
chr10	425753	455087	+	LL0000038398	ZDB-GENE-091118-26	zdhhc8a	zinc finger DHHC-type palmitoyltransferase 8a	ZFIN	protein_coding
chr10	425753	435578	+	LL0000018177		LOC569920	ankyrin repeat and LEM domain-containing protein 2-like	GCF_000002035.6_GRCz11	protein_coding
chr10	436898	438374	+	LL0000032419		XLOC_001793		Cufflinks; see BLAST hits		low confidence,XP_021335606.1,LOC101886098,Fc receptor-like protein 5, transcript variant X5	no Blast hit
chr10	456651	457428	+	LL0000032420		XLOC_001795		Cufflinks; see BLAST hits		no Blast hit	no Blast hit
chr10	457520	506408	+	LL0000001433	ZDB-GENE-091113-43	arvcfa	ARVCF delta catenin family member a	ZFIN	protein_coding
chr10	506538	512306	+	LL0000025790	ZDB-GENE-091204-367	si:ch211-242f23.3	si:ch211-242f23.3	ZFIN	protein_coding
chr10	507097	509049	+	LL0000018021		LOC110440081	uncharacterized LOC110440081	GCF_000002035.6_GRCz11	protein_coding
chr10	509428	512306	+	LL0000016907		LOC108191543	uncharacterized LOC108191543,non-coding	GCF_000002035.6_GRCz11	lincRNA
chr10	518546	532628	+	LL0000020522	ZDB-GENE-070424-44	npffr1l3	neuropeptide FF receptor 1 like 3	ZFIN	protein_coding
chr10	540418	543349	+	LL0000014871		LOC101884200	uncharacterized LOC101884200,non-coding	GCF_000002035.6_GRCz11	lincRNA
chr10	563019	567944	+	LL0000001940	ZDB-GENE-130530-629	bmp10l	bone morphogenetic protein 10, like	ZFIN	protein_coding
chr10	573667	590083	+	LL0000028934	ZDB-GENE-990603-8	smad4a	SMAD family member 4a	ZFIN	protein_coding
chr10	589501	591847	+	LL0000013869		LO018557.1		Clone-based (Ensembl) gene	protein_coding
chr10	595473	641626	-	LL0000023579	ZDB-GENE-061103-253	rfx3	regulatory factor X, 3 (influences HLA class II expression)	ZFIN	protein_coding
chr10	643684	690246	-	LL0000011380	ZDB-GENE-070112-2232	glis3	GLIS family zinc finger 3	ZFIN	protein_coding
chr10	883376	1108695	+	LL0000031629	ZDB-GENE-030131-9196	unc5c	unc-5 netrin receptor C	ZFIN	protein_coding
chr10	1082552	1180612	-	LL0000001959	ZDB-GENE-090610-1	bmpr1bb	bone morphogenetic protein receptor, type IBb	ZFIN	protein_coding
chr10	1183049	1184333	-	LL0000032501		XLOC_002484		Cufflinks; see BLAST hits		no Blast hit	no Blast hit
chr10	1187443	1276046	-	LL0000021549	ZDB-GENE-040426-908	pdlim5b	PDZ and LIM domain 5b	ZFIN	protein_coding
chr10	1293694	1340137	-	LL0000020904	ZDB-GENE-110622-1	opn4xa	opsin 4xa	ZFIN	protein_coding
chr10	1396925	1416515	+	LL0000011243	ZDB-GENE-010226-1	gdnfa	glial cell derived neurotrophic factor a	ZFIN	protein_coding
chr10	1414425	1416434	-	LL0000032502		XLOC_002487		Cufflinks; see BLAST hits		low confidence,NP_001106978.1,il23r,interleukin 23 receptor	no Blast hit
chr10	1416551	1418669	-	LL0000032503		XLOC_002488		Cufflinks; see BLAST hits		low confidence,XP_009302231.1,LOC560461,IQ motif and SEC7 domain-containing protein 2, transcript variant X5	low confidence,NP_001350624.1,PPT1,palmitoyl-protein thioesterase 1 isoform 3 precursor
chr10	1423411	1424552	-	LL0000032504		XLOC_002489		Cufflinks; see BLAST hits		no Blast hit	no Blast hit
chr10	1425619	1525392	-	LL0000032036		WDR70	WD repeat domain 70 [Source:NCBI gene;Acc:101884837]	HGNC symbol	protein_coding
chr10	1541263	1544095	-	LL0000004303		CABZ01066320.2		Clone-based (Ensembl) gene	lincRNA
chr10	1544163	1552789	-	LL0000004302		CABZ01066320.1		Clone-based (Ensembl) gene	lincRNA
chr10	1590604	1591103	+	LL0000021066	ZDB-GENE-100721-7	ora5	olfactory receptor class A related 5	ZFIN	protein_coding
chr10	1595598	1636491	-	LL0000020749	ZDB-GENE-040426-711	nup155	nucleoporin 155	ZFIN	protein_coding
chr10	1638876	1675362	+	LL0000024606	ZDB-GENE-091117-39	sgsm1b	small G protein signaling modulator 1b	ZFIN	protein_coding
chr10	1681518	1684882	+	LL0000031062	ZDB-GENE-050417-161	triap1	TP53 regulated inhibitor of apoptosis 1	ZFIN	protein_coding
chr10	1686975	1697121	-	LL0000029412	ZDB-GENE-040426-2397	srsf9	serine and arginine rich splicing factor 9	ZFIN	protein_coding
chr10	1708117	1718402	-	LL0000026555	ZDB-GENE-030131-7892	si:ch73-46j18.5	si:ch73-46j18.5	ZFIN	protein_coding
chr10	1721162	1734406	-	LL0000011095	ZDB-GENE-091117-38	gal3st1b	galactose-3-O-sulfotransferase 1b	ZFIN	protein_coding
chr10	1745260	1827586	-	LL0000009691	ZDB-GENE-990415-20	epb41l4a	erythrocyte membrane protein band 4.1 like 4A	ZFIN	protein_coding
chr10	1829489	1893095	+	LL0000001157	ZDB-GENE-031112-7	apc	APC regulator of WNT signaling pathway	ZFIN	protein_coding
chr10	1899595	1900662	+	LL0000003921		C3AR1	C3a anaphylatoxin chemotactic receptor [Source:NCBI gene;Acc:794255]	HGNC symbol	protein_coding
chr10	1906601	1909162	-	LL0000032505		XLOC_002497		Cufflinks; see BLAST hits		no Blast hit	no Blast hit
chr10	1955474	1961930	-	LL0000030108	ZDB-GENE-990415-198	tdgf1	teratocarcinoma-derived growth factor 1	ZFIN	protein_coding
chr10	1982550	1991468	+	LL0000004366		CABZ01070747.1	uncharacterized LOC100535760 [Source:NCBI gene;Acc:100535760]	Clone-based (Ensembl) gene	lincRNA
chr10	2004118	2004286	+	LL0000032421		XLOC_001813		Cufflinks; see BLAST hits		low confidence,NP_001076344.1,si:dkey-236e20.3,si:dkey-236e20.3	low confidence,XP_016857808.1,FCRL2,Fc receptor-like protein 2 isoform X7
chr10	2043224	2047571	+	LL0000014947		LOC101884606	uncharacterized LOC101884606,non-coding	GCF_000002035.6_GRCz11	lincRNA
chr10	2043577	2047571	+	LL0000032422		XLOC_001814		Cufflinks; see BLAST hits		low confidence,XP_021334698.1,LOC101882148,uncharacterized LOC101882148, transcript variant X5	low confidence,XP_016862321.1,IFT122,intraflagellar transport protein 122 homolog isoform X18
chr10	2175562	2394368	+	LL0000005950	ZDB-GENE-091113-51	cntnap3	contactin associated protein family member 3	ZFIN	protein_coding
chr10	2398126	2401479	+	LL0000032423		XLOC_001816		Cufflinks; see BLAST hits		low confidence,NP_001025454.1,ldlra,low density lipoprotein receptor a	no Blast hit
chr10	2499383	2527342	-	LL0000008262		CU856539.1	hippocampus abundant transcript 1 protein-like [Source:NCBI gene;Acc:557306]	Clone-based (Ensembl) gene	protein_coding
chr10	2527094	2550383	+	LL0000039375	ZDB-GENE-140106-261	zmp:0000001301	zmp:0000001301	ZFIN	protein_coding
chr10	2556859	2580958	+	LL0000029281	ZDB-GENE-161230-18	spina	spindlin a	ZFIN	protein_coding
chr10	2573161	2603801	-	LL0000008264		CU856539.3		Clone-based (Ensembl) gene	protein_coding
chr10	2581951	2585625	+	LL0000020780	ZDB-GENE-041212-55	nxnl2	nucleoredoxin like 2	ZFIN	protein_coding
chr10	2587234	2595731	+	LL0000032129	ZDB-GENE-030131-1098	wu:fb59d01	wu:fb59d01	ZFIN	protein_coding
chr10	2600737	2669206	+	LL0000008263		CU856539.2	myosin-IIIb [Source:NCBI gene;Acc:556989]	Clone-based (Ensembl) gene	protein_coding
chr10	2669405	2671295	+	LL0000005128	ZDB-GENE-140714-1	ccl27b	chemokine (C-C motif) ligand 27b	ZFIN	protein_coding
chr10	2674135	2682403	-	LL0000021565	ZDB-GENE-080723-69	pdxp	pyridoxal (pyridoxine, vitamin B6) phosphatase	ZFIN	protein_coding
chr10	2684958	2691375	+	LL0000024539	ZDB-GENE-120727-15	setd9	SET domain containing 9	ZFIN	protein_coding
chr10	2695464	2713268	-	LL0000019032	ZDB-GENE-050913-97	mier3a	mesoderm induction early response 1, family member 3 a	ZFIN	protein_coding
chr10	2715471	2755378	+	LL0000011754	ZDB-GENE-091204-274	grk5	G protein-coupled receptor kinase 5	ZFIN	protein_coding
chr10	2758825	2788792	-	LL0000001477	ZDB-GENE-030131-494	ash2l	ash2 like, histone lysine methyltransferase complex subunit	ZFIN	protein_coding
chr10	2799285	2803213	+	LL0000022233	ZDB-GENE-030328-42	pnx	posterior neuron-specific homeobox	ZFIN	protein_coding
chr10	2807136	2838190	+	LL0000000429	ZDB-GENE-030131-2390	aebp1	AE binding protein 1	ZFIN	protein_coding
chr10	2841205	2850936	+	LL0000038258	ZDB-GENE-040426-733	ykt6	YKT6 v-SNARE homolog (S. cerevisiae)	ZFIN	protein_coding
chr10	2856377	2875735	-	LL0000008798	ZDB-GENE-040825-3	ddx56	DEAD (Asp-Glu-Ala-Asp) box helicase 56	ZFIN	protein_coding
chr10	2875973	2898756	+	LL0000005013	ZDB-GENE-091204-207	ccar2	cell cycle and apoptosis regulator 2	ZFIN	protein_coding
chr10	2898901	2922127	+	LL0000009749	ZDB-GENE-091113-7	erap1a	endoplasmic reticulum aminopeptidase 1a	ZFIN	protein_coding
chr10	2924775	2943474	-	LL0000020808	ZDB-GENE-040426-2685	oclna	occludin a	ZFIN	protein_coding
chr10	2943676	2971448	-	LL0000018689	ZDB-GENE-050411-59	marveld2a	MARVEL domain containing 2a	ZFIN	protein_coding
chr10	2975965	3027632	+	LL0000038428	ZDB-GENE-091116-62	zfyve16	zinc finger, FYVE domain containing 16	ZFIN	protein_coding
chr10	3030921	3039937	-	LL0000001038	ZDB-GENE-091118-17	ankrd34ba	ankyrin repeat domain 34Ba	ZFIN	protein_coding
chr10	3049329	3109806	+	LL0000023223	ZDB-GENE-111128-1	rasgrf2a	Ras protein-specific guanine nucleotide-releasing factor 2a	ZFIN	protein_coding
chr10	3111004	3129887	+	LL0000005730	ZDB-GENE-030131-5717	ckmt2a	creatine kinase, mitochondrial 2a (sarcomeric)	ZFIN	protein_coding
chr10	3133098	3138859	-	LL0000031486	ZDB-GENE-030131-2977	ube2l3a	ubiquitin-conjugating enzyme E2L 3a	ZFIN	protein_coding
chr10	3137157	3161240	+	LL0000012103	ZDB-GENE-030619-1	hic2	hypermethylated in cancer 2	ZFIN	protein_coding
chr10	3161733	3165891	+	LL0000032424		XLOC_001835		Cufflinks; see BLAST hits		moderate confidence,NP_001025454.1,ldlra,low density lipoprotein receptor a	no Blast hit
chr10	3183736	3184654	-	LL0000032506		XLOC_002509		Cufflinks; see BLAST hits		no Blast hit	no Blast hit
chr10	3186279	3261187	-	LL0000021749	ZDB-GENE-100204-2	pi4kaa	phosphatidylinositol 4-kinase, catalytic, alpha a	ZFIN	protein_coding
chr10	3265944	3295226	-	LL0000028593	ZDB-GENE-130114-1	slc25a1b	slc25a1 solute carrier family 25 member 1b	ZFIN	protein_coding
chr10	3299829	3322338	+	LL0000039168	ZDB-GENE-040426-954	zgc:56235	zgc:56235	ZFIN	protein_coding
chr10	3322663	3332362	-	LL0000030837	ZDB-GENE-050417-9	tor4aa	torsin family 4, member Aa	ZFIN	protein_coding
chr10	3336772	3361952	+	LL0000001993	ZDB-GENE-040718-168	brap	BRCA1 associated protein	ZFIN	protein_coding
chr10	3364630	3394298	-	LL0000019936	ZDB-GENE-041111-190	naa25	N(alpha)-acetyltransferase 25, NatB auxiliary subunit	ZFIN	protein_coding
chr10	3397871	3416258	-	LL0000008797	ZDB-GENE-021212-1	ddx55	DEAD (Asp-Glu-Ala-Asp) box polypeptide 55	ZFIN	protein_coding
chr10	3419832	3427630	-	LL0000030429	ZDB-GENE-030131-269	tmed2	transmembrane p24 trafficking protein 2	ZFIN	protein_coding
chr10	3428127	3455639	+	LL0000022871	ZDB-GENE-030131-5911	ptpn11a	protein tyrosine phosphatase non-receptor type 11a	ZFIN	protein_coding
chr10	3461748	3512821	+	LL0000023891	ZDB-GENE-090706-2	rph3aa	rabphilin 3A homolog (mouse), a	ZFIN	protein_coding
chr10	3512929	3515287	+	LL0000032425		XLOC_001841		Cufflinks; see BLAST hits		low confidence,NP_001336124.1,col18a1a,collagen type XVIII alpha 1 chain a	no Blast hit
chr10	3520256	3532997	+	LL0000022051	ZDB-GENE-051113-96	pla2g3	phospholipase A2 group III	ZFIN	protein_coding
chr10	3534522	4040531	+	LL0000031296		TTC28	tetratricopeptide repeat domain 28 [Source:NCBI gene;Acc:100331958]	HGNC symbol	protein_coding
chr10	3708689	3710742	-	LL0000032507		XLOC_002516		Cufflinks; see BLAST hits		no Blast hit	no Blast hit
chr10	3729076	3730146	+	LL0000032426		XLOC_001843		Cufflinks; see BLAST hits		no Blast hit	no Blast hit
chr10	3856965	3864772	+	LL0000015411		LOC101886896	uncharacterized LOC101886896	GCF_000002035.6_GRCz11	protein_coding
chr10	4046350	4088187	+	LL0000021997	ZDB-GENE-040426-895	pitpnb	phosphatidylinositol transfer protein, beta	ZFIN	protein_coding
chr10	4089007	4091356	+	LL0000032427		XLOC_001847		Cufflinks; see BLAST hits		low confidence,NP_001025454.1,ldlra,low density lipoprotein receptor a	no Blast hit
chr10	4094849	4116413	+	LL0000019423	ZDB-GENE-030131-4968	mn1a	meningioma 1a	ZFIN	protein_coding
chr10	4235998	4265242	+	LL0000022159	ZDB-GENE-040625-138	plppr1	phospholipid phosphatase related 1	ZFIN	protein_coding
chr10	4278990	4316295	-	LL0000011741	ZDB-GENE-130530-780	grin3a	glutamate receptor, ionotropic, N-methyl-D-aspartate 3A	ZFIN	protein_coding
chr10	4367430	4406168	-	LL0000004416		CABZ01073795.1	interferon-induced protein 44 [Source:NCBI gene;Acc:795887]	Clone-based (Ensembl) gene	protein_coding
chr10	4493277	4493358	+	LL0000019269	ZDB-MIRNAG-090929-33	mir430a-1	microRNA 430a-1	ZFIN	miRNA
chr10	4499910	4509167	+	LL0000022137	ZDB-GENE-060810-71	plk2a	polo-like kinase 2a (Drosophila)	ZFIN	protein_coding
chr10	4582305	4583173	-	LL0000016188		LOC103911707	uncharacterized LOC103911707,non-coding	GCF_000002035.6_GRCz11	lincRNA
chr10	4607036	4641949	-	LL0000032508		XLOC_002521		Cufflinks; see BLAST hits		low confidence,NP_001002132.1,plppr1,phospholipid phosphatase related 1	low confidence,NP_060223.2,PLPPR1,phospholipid phosphatase-related protein type 1
chr10	4717989	4918622	+	LL0000021234		palm2	paralemmin 2 [Source:ZFIN;Acc:ZDB-GENE-050208-62]	ZFIN	protein_coding
chr10	4796645	4797207	-	LL0000032509		XLOC_002522		Cufflinks; see BLAST hits		moderate confidence,NP_001315129.1,si:dkey-77f5.3,si:dkey-77f5.3	low confidence,XP_011528058.1,SPATC1L,speriolin-like protein isoform X2
chr10	4922790	4923849	-	LL0000032510		XLOC_002523		Cufflinks; see BLAST hits		low confidence,NP_001091725.1,zgc:165604,zgc:165604	no Blast hit
chr10	4923921	4936843	+	LL0000028784	ZDB-GENE-170126-3	slc46a2	solute carrier family 46 member 2	ZFIN	protein_coding
chr10	4940767	4961929	-	LL0000029119	ZDB-GENE-050417-330	snx30	sorting nexin family member 30	ZFIN	protein_coding
chr10	4962731	4963270	+	LL0000007813		CU074419.2	si:ch73-234b20.4 [Source:NCBI gene;Acc:100535107]	Clone-based (Ensembl) gene	lincRNA
chr10	4964463	4969208	+	LL0000018485	ZDB-GENE-070615-32	lyrm7	LYR motif containing 7	ZFIN	protein_coding
chr10	4969634	4980150	-	LL0000018703	ZDB-GENE-060421-5255	mat2al	methionine adenosyltransferase II, alpha-like	ZFIN	protein_coding
chr10	4986050	4987483	+	LL0000007812		CU074419.1		Clone-based (Ensembl) gene	processed_transcript
chr10	4987566	4996056	+	LL0000026343	ZDB-GENE-041008-183	si:ch73-234b20.5	si:ch73-234b20.5	ZFIN	protein_coding
chr10	4997109	4998224	-	LL0000032511		XLOC_002526		Cufflinks; see BLAST hits		low confidence,XP_017211226.1,LOC108183929,gastrula zinc finger protein XlCGF8.2DB-like	no Blast hit
chr10	5000623	5020378	-	LL0000012212	ZDB-GENE-070424-97	hnrnpd	heterogeneous nuclear ribonucleoprotein D	ZFIN	protein_coding
chr10	5017216	5024526	-	LL0000012213	ZDB-GENE-040426-2717	hnrnpdl	heterogeneous nuclear ribonucleoprotein D-like	ZFIN	protein_coding
chr10	5017216	5024525	-	LL0000012226		hnrnpdl		ZFINalias							alias matched change to hnrnpdl
chr10	5025696	5037449	+	LL0000009652	ZDB-GENE-040704-73	enoph1	enolase-phosphatase 1	ZFIN	protein_coding
chr10	5041711	5060122	-	LL0000030490	ZDB-GENE-090112-5	tmem150c	transmembrane protein 150C	ZFIN	protein_coding
chr10	5060191	5090599	+	LL0000004909	ZDB-GENE-090312-219	carm1l	coactivator-associated arginine methyltransferase 1, like	ZFIN	protein_coding
chr10	5092500	5135845	-	LL0000024383	ZDB-GENE-020919-2	sec31a	SEC31 homolog A, COPII coat complex component	ZFIN	protein_coding
chr10	5135842	5147582	+	LL0000038594	ZDB-GENE-050508-2	zgc:113274	zgc:113274	ZFIN	protein_coding
chr10	5149359	5152493	+	LL0000025822	ZDB-GENE-090311-36	si:ch211-249h16.8	si:ch211-249h16.8	ZFIN	protein_coding
chr10	5149524	5152837	+	LL0000017504		LOC110438839	uncharacterized LOC110438839	GCF_000002035.6_GRCz11	protein_coding
chr10	5155131	5156482	+	LL0000017505		LOC110438840	uncharacterized LOC110438840,non-coding	GCF_000002035.6_GRCz11	lincRNA
chr10	5159371	5223964	+	LL0000005299	ZDB-GENE-080204-45	cdc42se2	CDC42 small effector 2	ZFIN	protein_coding
chr10	5225327	5226110	+	LL0000032428		XLOC_001864		Cufflinks; see BLAST hits		low confidence,XP_017213985.1,tanc2b,tetratricopeptide repeat, ankyrin repeat and coiled-coil containing 2b	no Blast hit
chr10	5234327	5265160	+	LL0000029341	ZDB-GENE-050522-61	sptlc1	serine palmitoyltransferase, long chain base subunit 1	ZFIN	protein_coding
chr10	5268054	5407509	+	LL0000023861	ZDB-GENE-060427-5	ror2	receptor tyrosine kinase-like orphan receptor 2	ZFIN	protein_coding
chr10	5409508	5410985	+	LL0000027793	ZDB-GENE-131127-467	si:dkey-60d5.3	si:dkey-60d5.3	ZFIN	protein_coding
chr10	5414224	5419256	+	LL0000020256	ZDB-GENE-040822-28	nfil3	nuclear factor, interleukin 3 regulated	ZFIN	protein_coding
chr10	5422505	5475977	+	LL0000001686	ZDB-GENE-040801-95	auh	AU RNA binding protein/enoyl-CoA hydratase	ZFIN	protein_coding
chr10	5525393	5527364	-	LL0000007961		CU466285.1		Clone-based (Ensembl) gene	lincRNA
chr10	5529734	5543090	+	LL0000007962		CU466285.2		Clone-based (Ensembl) gene	antisense
chr10	5533840	5591965	-	LL0000029736	ZDB-GENE-040702-3	syk	spleen tyrosine kinase	ZFIN	protein_coding
chr10	5591319	5600796	+	LL0000008949	ZDB-GENE-190529-2	diras2	DIRAS family GTPase 2	ZFIN	protein_coding
chr10	5602583	5603745	+	LL0000032429		XLOC_001872		Cufflinks; see BLAST hits		low confidence,XP_021335891.1,arhgap27,Rho GTPase activating protein 27, transcript variant X3	no Blast hit
chr10	5605300	5606819	+	LL0000032430		XLOC_001873		Cufflinks; see BLAST hits		low confidence,NP_998507.1,ddc,dopa decarboxylase	no Blast hit
chr10	5606933	5608631	+	LL0000032431		XLOC_001874		Cufflinks; see BLAST hits		low confidence,NP_001076514.1,sphkap,SPHK1 interactor, AKAP domain containing	no Blast hit
chr10	5608874	5609718	+	LL0000032432		XLOC_001875		Cufflinks; see BLAST hits		low confidence,XP_021322010.1,p4ha3,prolyl 4-hydroxylase, alpha polypeptide III, transcript variant X5	no Blast hit
chr10	5620541	5660642	+	LL0000021576	ZDB-GENE-090313-385	pdzph1	PDZ and pleckstrin homology domains 1	ZFIN	protein_coding
chr10	5645714	5684326	-	LL0000029485	ZDB-GENE-060322-10	st8sia4	ST8 alpha-N-acetyl-neuraminide alpha-2,8-sialyltransferase 4	ZFIN	protein_coding
chr10	5662761	5666099	-	LL0000032512		XLOC_002533		Cufflinks; see BLAST hits		low confidence,XP_021333058.1,LOC101883618,uncharacterized protein PF11_0213-like	low confidence,NP_001278340.1,SON,protein SON isoform E
chr10	5689510	5787288	+	LL0000021238	ZDB-GENE-090313-384	pam	peptidylglycine alpha-amidating monooxygenase	ZFIN	protein_coding
chr10	5788453	5821584	-	LL0000012688	ZDB-GENE-080104-6	il6st	interleukin 6 signal transducer	ZFIN	protein_coding
chr10	5823759	5848182	-	LL0000001053	ZDB-GENE-080104-7	ankrd55	ankyrin repeat domain 55	ZFIN	protein_coding
chr10	5852359	5857548	-	LL0000025977	ZDB-GENE-090311-35	si:ch211-281k19.2	si:ch211-281k19.2	ZFIN	protein_coding
chr10	5904343	6006556	+	LL0000018593	ZDB-GENE-090313-412	map3k1	mitogen-activated protein kinase kinase kinase 1, E3 ubiquitin protein ligase	ZFIN	protein_coding
chr10	6010562	6034410	+	LL0000012178	ZDB-GENE-040426-1042	hmgcs1	3-hydroxy-3-methylglutaryl-CoA synthase 1 (soluble)	ZFIN	protein_coding
chr10	6041033	6061286	+	LL0000014213		LOC100334422	E3 ubiquitin-protein ligase RNF12-B-like	GCF_000002035.6_GRCz11	protein_coding
chr10	6043509	6046207	-	LL0000032513		XLOC_002539		Cufflinks; see BLAST hits		high confidence,XP_021322653.1,LOC110437994,uncharacterized LOC110437994, transcript variant X1	low confidence,XP_011515015.1,GTF2IRD1,general transcription factor II-I repeat domain-containing protein 1 isoform X6
chr10	6061566	6062457	+	LL0000018009		LOC110440061	serine/threonine-protein kinase pim-2-like	GCF_000002035.6_GRCz11	protein_coding
chr10	6075355	6075999	+	LL0000032433		XLOC_001882		Cufflinks; see BLAST hits		high confidence,XP_021334914.1,LOC110440061,serine/threonine-protein kinase pim-2-like	low confidence,XP_005265302.1,SNRK,SNF-related serine/threonine-protein kinase isoform X1
chr10	6086560	6091950	+	LL0000016902		LOC108191530	CBL-interacting serine/threonine-protein kinase 18-like	GCF_000002035.6_GRCz11	protein_coding
chr10	6100588	6105289	+	LL0000016189		LOC103911713	uncharacterized LOC103911713,non-coding	GCF_000002035.6_GRCz11	lincRNA
chr10	6114788	6116598	+	LL0000013925		LOC100003556	serine/threonine-protein kinase pim-2-like	GCF_000002035.6_GRCz11	protein_coding
chr10	6121494	6313908	+	LL0000030364	ZDB-GENE-031002-48	tln1	talin 1	ZFIN	protein_coding
chr10	6318196	6375394	+	LL0000030875	ZDB-GENE-040625-114	tpm2	tropomyosin 2 (beta)	ZFIN	protein_coding
chr10	6383240	6413779	+	LL0000038646	ZDB-GENE-050913-96	zgc:114200	zgc:114200	ZFIN	protein_coding
chr10	6410934	6412253	-	LL0000032514		XLOC_002540		Cufflinks; see BLAST hits		moderate confidence,NP_001106978.1,il23r,interleukin 23 receptor	no Blast hit
chr10	6414224	6415349	-	LL0000032515		XLOC_002541		Cufflinks; see BLAST hits		low confidence,NP_001038409.1,jtb,jumping translocation breakpoint	no Blast hit
chr10	6415477	6454452	-	LL0000003955	ZDB-GENE-080818-5	ca9	carbonic anhydrase IX	ZFIN	protein_coding
chr10	6473092	6494070	-	LL0000008727	ZDB-GENE-040426-851	dcp2	decapping mRNA 2	ZFIN	protein_coding
chr10	6496185	6518065	+	LL0000023385	ZDB-GENE-030131-9181	reep5	receptor accessory protein 5	ZFIN	protein_coding
chr10	6521376	6588796	-	LL0000005569	ZDB-GENE-030131-7120	chd1	chromodomain helicase DNA binding protein 1	ZFIN	protein_coding
chr10	6594737	6602888	-	LL0000016190		LOC103911715	protein ALP1-like	GCF_000002035.6_GRCz11	protein_coding
chr10	6611075	6638235	-	LL0000002911		BX511100.5		Clone-based (Ensembl) gene	transcribed_unprocessed_pseudogene
chr10	6613279	6618833	+	LL0000026073	ZDB-GENE-090312-43	si:ch211-57m13.1	si:ch211-57m13.1	ZFIN	protein_coding
chr10	6627264	6628593	+	LL0000016903		LOC108191531	DNA translocase FtsK 1-like	GCF_000002035.6_GRCz11	protein_coding
chr10	6628606	6629867	+	LL0000016191		LOC103911717	serine/threonine-protein kinase pim-2-like	GCF_000002035.6_GRCz11	protein_coding
chr10	6637730	6639167	-	LL0000002908		BX511100.2		Clone-based (Ensembl) gene	transcribed_unprocessed_pseudogene
chr10	6641514	6646684	+	LL0000026075	ZDB-GENE-110411-66	si:ch211-57m13.5	si:ch211-57m13.5	ZFIN	protein_coding
chr10	6650088	6654487	-	LL0000016904		LOC108191533	uncharacterized LOC108191533	GCF_000002035.6_GRCz11	protein_coding
chr10	6661059	6662868	-	LL0000002912		BX511100.6		Clone-based (Ensembl) gene	unprocessed_pseudogene
chr10	6664911	6670283	+	LL0000026076	ZDB-GENE-110411-143	si:ch211-57m13.6	si:ch211-57m13.6	ZFIN	protein_coding
chr10	6677673	6679486	-	LL0000002909		BX511100.3		Clone-based (Ensembl) gene	unprocessed_pseudogene
chr10	6681523	6686975	+	LL0000026077	ZDB-GENE-110411-107	si:ch211-57m13.7	si:ch211-57m13.7	ZFIN	protein_coding
chr10	6691680	6691828	+	LL0000032434		XLOC_001895		Cufflinks; see BLAST hits		low confidence,XP_009306033.1,si:ch73-45o6.2,si:ch73-45o6.2, transcript variant X2	low confidence,XP_011543167.1,ATG2A,autophagy-related protein 2 homolog A isoform X5
chr10	6693518	6695332	-	LL0000002907		BX511100.1		Clone-based (Ensembl) gene	unprocessed_pseudogene
chr10	6697369	6702812	+	LL0000026078	ZDB-GENE-110411-238	si:ch211-57m13.8	si:ch211-57m13.8	ZFIN	protein_coding
chr10	6725657	6727114	-	LL0000002910		BX511100.4		Clone-based (Ensembl) gene	unprocessed_pseudogene
chr10	6729670	6736081	-	LL0000026079	ZDB-GENE-110411-61	si:ch211-57m13.9	si:ch211-57m13.9	ZFIN	protein_coding
chr10	6736184	6744770	-	LL0000032516		XLOC_002555		Cufflinks; see BLAST hits		high confidence,XP_005172048.2,LOC101882464,uncharacterized LOC101882464	low confidence,NP_033611.1,AGTR1,type-1 angiotensin II receptor isoform 1
chr10	6736816	6737725	-	LL0000032517		XLOC_002556		Cufflinks; see BLAST hits		low confidence,XP_009298332.1,LOC100535105,leucine-rich repeat neuronal protein 3-like, transcript variant X2	no Blast hit
chr10	6737726	6739127	-	LL0000032518		XLOC_002557		Cufflinks; see BLAST hits		low confidence,NP_001352480.1,rps6kc1,ribosomal protein S6 kinase polypeptide 1	no Blast hit
chr10	6747720	6753115	+	LL0000026074	ZDB-GENE-110411-264	si:ch211-57m13.10	si:ch211-57m13.10	ZFIN	protein_coding
chr10	6754141	6775271	-	LL0000039111		zgc:194281	zgc:194281 [Source:ZFIN;Acc:ZDB-GENE-081022-94]	ZFIN	protein_coding
chr10	6781121	6874287	-	LL0000022389	ZDB-GENE-091204-125	ppip5k2	diphosphoinositol pentakisphosphate kinase 2	ZFIN	protein_coding
chr10	6884123	6905669	+	LL0000008786	ZDB-GENE-990415-272	ddx4	DEAD (Asp-Glu-Ala-Asp) box polypeptide 4	ZFIN	protein_coding
chr10	6907715	6947462	+	LL0000028745	ZDB-GENE-061013-597	slc38a9	solute carrier family 38 member 9	ZFIN	protein_coding
chr10	6946692	6978934	-	LL0000024619	ZDB-GENE-040426-932	sh2d4a	SH2 domain containing 4A	ZFIN	protein_coding
chr10	6991923	7233994	+	LL0000022724	ZDB-GENE-030131-8195	psd3l	pleckstrin and Sec7 domain containing 3, like	ZFIN	protein_coding
chr10	7255533	7268178	+	LL0000010998	ZDB-GENE-081022-183	fut10	fucosyltransferase 10	ZFIN	protein_coding
chr10	7282703	7472479	-	LL0000020616	ZDB-GENE-050302-113	nrg1	neuregulin 1	ZFIN	protein_coding
chr10	7483545	7555660	-	LL0000032110	ZDB-GENE-070702-2	wrn	WRN RecQ like helicase	ZFIN	protein_coding
chr10	7558970	7561413	-	LL0000032519		XLOC_002565		Cufflinks; see BLAST hits		low confidence,XP_021324890.1,si:dkey-71d15.2,si:dkey-71d15.2, transcript variant X3	no Blast hit
chr10	7561767	7563065	-	LL0000032520		XLOC_002566		Cufflinks; see BLAST hits		low confidence,NP_001025454.1,ldlra,low density lipoprotein receptor a	no Blast hit
chr10	7563350	7570060	+	LL0000022939	ZDB-GENE-070702-3	purg	purine-rich element binding protein G	ZFIN	protein_coding
chr10	7573316	7578051	+	LL0000003022		BX537303.1		Clone-based (Ensembl) gene	processed_transcript
chr10	7585928	7588878	+	LL0000030183	ZDB-GENE-091204-395	tex15	testis expressed 15	ZFIN	protein_coding
chr10	7593185	7617940	+	LL0000022459	ZDB-GENE-040426-2487	ppp2cb	protein phosphatase 2, catalytic subunit, beta isozyme	ZFIN	protein_coding
chr10	7609657	7636423	-	LL0000031541	ZDB-GENE-050522-266	ubxn8	UBX domain protein 8	ZFIN	protein_coding
chr10	7618805	7620076	-	LL0000032521		XLOC_002568		Cufflinks; see BLAST hits		low confidence,XP_021330858.1,znf1085,zinc finger protein 1085	no Blast hit
chr10	7636811	7640797	+	LL0000012115	ZDB-GENE-040927-8	hint1	histidine triad nucleotide binding protein 1	ZFIN	protein_coding
chr10	7645746	7671241	-	LL0000021465	ZDB-GENE-050417-98	pcyox1	prenylcysteine oxidase 1	ZFIN	protein_coding
chr10	7671260	7672949	+	LL0000009990	ZDB-GENE-040426-2729	fam136a	family with sequence similarity 136 member A	ZFIN	protein_coding
chr10	7673446	7702042	-	LL0000011417	ZDB-GENE-030131-865	gmcl1	germ cell-less, spermatogenesis associated	ZFIN	protein_coding
chr10	7703212	7723457	+	LL0000011290	ZDB-GENE-030826-27	ggcx	gamma-glutamyl carboxylase	ZFIN	protein_coding
chr10	7727281	7734939	-	LL0000029113	ZDB-GENE-050913-45	snx24	sorting nexin 24	ZFIN	protein_coding
chr10	7738540	7756876	-	LL0000018273	ZDB-GENE-040426-2398	loxa	lysyl oxidase a	ZFIN	protein_coding
chr10	7769814	7772434	-	LL0000026472	ZDB-GENE-141216-448	si:ch73-340n8.4	si:ch73-340n8.4	ZFIN	protein_coding
chr10	7778870	7786020	-	LL0000019508	ZDB-GENE-030131-9460	mpx	myeloid-specific peroxidase	ZFIN	protein_coding
chr10	7798070	7806734	-	LL0000024574	ZDB-GENE-091204-378	sftpba	surfactant protein Ba	ZFIN	protein_coding
chr10	7805542	7806734	-	LL0000032522		XLOC_002577		Cufflinks; see BLAST hits		low confidence,XP_021330857.1,LOC100332433,gastrula zinc finger protein XlCGF8.2DB-like	no Blast hit
chr10	7809019	7821687	-	LL0000018701	ZDB-GENE-030131-2049	mat2aa	methionine adenosyltransferase II, alpha a	ZFIN	protein_coding
chr10	7828239	7828809	-	LL0000032523		XLOC_002579		Cufflinks; see BLAST hits		no Blast hit	low confidence,XP_011520948.1,ZNF75A,zinc finger protein 75A isoform X1
chr10	7829010	7858553	-	LL0000012775	ZDB-GENE-091117-4	inpp5ja	inositol polyphosphate-5-phosphatase Ja	ZFIN	protein_coding
chr10	7831004	7871180	-	LL0000018175		LOC569568	phosphatidylinositol 4	GCF_000002035.6_GRCz11	protein_coding
chr10	7870627	7892684	-	LL0000002520		BX294661.1		Clone-based (Ensembl) gene	processed_transcript
chr10	7875076	7892571	-	LL0000029014	ZDB-GENE-091204-245	smtna	smoothelin a	ZFIN	protein_coding
chr10	7884128	7885654	-	LL0000002521		BX294661.2		Clone-based (Ensembl) gene	protein_coding
chr10	7899139	7913755	-	LL0000028716	ZDB-GENE-050417-407	slc35e4	solute carrier family 35 member E4	ZFIN	protein_coding
chr10	7916544	7965547	-	LL0000021083	ZDB-GENE-091113-18	osbp2	oxysterol binding protein 2	ZFIN	protein_coding
chr10	7968130	7974762	-	LL0000018022		LOC110440083	oxysterol-binding protein 1-like	GCF_000002035.6_GRCz11	protein_coding
[truncated: 37,989 more rows]
