# Supplementary material for: An improved zebrafish transcriptome annotation for sensitive and comprehensive detection of cell type-specific genes
Source: eLife. 2020 Aug 24;9:e55792. doi: 10.7554/eLife.55792 (PMC7486121; doi:10.7554/eLife.55792)
Supplement: Figure 1—figure supplement 1—source data 1. — Gene expression levels were quantified using RSEM. Median ratio normalized expression values are shown for each replicate, along with adjusted p-value, and log2 fold change. Data used to generate plots in Figure 1—figure supplement 1C–E, and incorporated into source data tables indicated below. [file elife-55792-fig1-figsupp1-data1.xlsx]

## Sheet: title
	Figure 1 - source data 3
	DESeq2 output for pdgfrb-pos and pdgfrb-neg RNA-seq quantified with RefSeq (GCF_000002035.6_GRCz11) or Ensembl, v95
	Worksheet 1 - RefSeq quantification
	Worksheet 2 - Ens95 quantification

## Sheet: 1 pdgfrb-cit RefSeq 
ID	EnsemblGeneID	NCBI Gene ID	WTnegative08	WTnegative11	WTnegative14	WTpdgfrb01	WTpdgfrb06	WTpdgfrb09	log2FoldChange	padj
a1cf	ENSDARG00000002968	562916	8.43094	14.6638	13.6863	24.1017	4.08841	4.95025	-0.146615	0.952375
a2ml	ENSDARG00000041645	100006972	42.1547	49.8569	266.883	18.3173	11.2431	28.7115	-2.62159	0.00305191
aaas	ENSDARG00000102274	378454	244.497	441.869	335.315	146.538	308.675	332.657	-0.375034	0.619319
aacs	ENSDARG00000012468	393984	379.392	310.873	466.312	270.903	173.757	203.95	-0.834125	0.0856608
aadac	ENSDARG00000063621	100148912	26.2296	24.4397	0.977594	23.1376	0	25.7413	-0.078817	0.979359
aadacl4	ENSDARG00000044802	569798	14.0516	12.7086	2.93278	9.64068	0	2.97015	-1.2307	1
aadat	ENSDARG00000011410	557979	18.7354	49.8569	45.9469	44.3471	11.2431	62.3732	0.0441614	0.979622
aaed1	ENSDARG00000075299	100332791	9.36771	7.82069	13.6863	29.8861	12.2652	10.8906	0.782464	0.618222
aagab	ENSDARG00000117041	436696	125.527	126.109	217.026	149.431	240.194	155.438	0.217754	0.794599
aak1a	ENSDARG00000011855	568999	295.083	185.741	131.975	96.4068	65.4145	111.876	-1.16276	0.0439647
aak1b	ENSDARG00000077686	100534954	136.769	116.333	103.625	80.9817	108.343	185.139	0.0696993	0.948528
aamdc	ENSDARG00000103957	553802	157.378	198.45	162.281	243.909	233.039	171.279	0.323372	0.625037
aamp	ENSDARG00000045019	405874	356.91	789.89	784.03	944.787	478.344	926.687	0.283529	0.722232
aanat1	ENSDARG00000036567	393677	52.4592	52.7897	19.5519	18.3173	4.08841	45.5423	-0.876424	0.516399
aanat2	ENSDARG00000079802	30685	57.143	81.1397	78.2075	156.179	62.3482	84.1543	0.484571	0.57137
aar2	ENSDARG00000018658	431768	97.4242	111.445	162.281	224.628	188.067	180.189	0.676172	0.235753
aars	ENSDARG00000113882	324940	850.588	1044.06	1018.65	1171.34	1182.57	1250.43	0.307122	0.546332
aars2	ENSDARG00000071240	792787	62.7637	87.0052	96.7818	58.8082	101.188	69.3035	-0.104948	0.921904
aarsd1	ENSDARG00000015747	445178	38.4076	25.4173	43.9917	10.6047	38.8399	14.8508	-0.748348	0.532015
aasdh	ENSDARG00000022730	570338	31.8502	17.5966	30.3054	14.461	9.19892	21.7811	-0.811017	0.512791
aasdhppt	ENSDARG00000037501	619247	70.2578	87.9828	91.8938	129.185	191.133	203.95	1.06768	0.0416848
aass	ENSDARG00000051816	556229	22.4825	37.1483	32.2606	40.4909	22.4862	4.95025	-0.434498	0.775983
aatf	ENSDARG00000109548	559477	116.16	188.674	193.564	181.245	198.288	188.11	0.187963	0.807579
aatka	ENSDARG00000078222	100004850	199.532	130.019	194.541	91.5865	99.1439	72.2737	-0.995014	0.0617143
aatkb	ENSDARG00000104442	555739	810.307	571.888	1033.32	728.835	959.754	492.055	-0.147642	0.853602
abat	ENSDARG00000006031	378968	201.406	261.993	403.746	325.855	365.913	375.229	0.299375	0.665398
abca12		558335	338.174	570.911	1657.02	292.113	356.714	677.195	-0.95242	0.211486
abca1a	ENSDARG00000074635	558924	2311.01	2712.8	2418.57	6993.35	5821.89	4684.92	1.23355	0.000647822
abca1b	ENSDARG00000079009	100136868	260.422	606.104	498.573	1018.06	1447.3	1242.51	1.44172	0.00158599
abca2	ENSDARG00000013500	100006090	431.851	237.554	447.738	251.622	143.094	234.642	-0.827631	0.137107
abca3b	ENSDARG00000100524	564344	957.38	863.209	1318.77	1208.94	1533.15	1118.76	0.298431	0.611036
abca4a	ENSDARG00000057169	798993	59.0166	43.9914	23.4623	5.78441	4.08841	18.811	-2.14012	0.0351136
abca4b	ENSDARG00000062661	555506	576.114	348.021	68.4316	117.616	58.2598	99.005	-1.85214	0.0132862
abca5	ENSDARG00000074041	100151075	321.312	355.842	384.194	487.818	360.802	411.861	0.248275	0.686674
abcb10	ENSDARG00000061591	100003744	103.045	153.481	167.169	83.8739	183.978	80.1941	-0.284192	0.755495
abcb11a	ENSDARG00000011573	797269	28.1031	19.5517	14.6639	0.964068	5.11051	10.8906	-1.87976	0.18183
abcb11b	ENSDARG00000070078	571189	25.2928	28.35	39.1038	28.922	9.19892	22.7712	-0.60477	0.630534
abcb3l1	ENSDARG00000036787	368771	9.36771	10.7535	1.95519	0.964068	4.08841	0	-2.13575	1
abcb4	ENSDARG00000010936	100136865	40.2812	24.4397	110.468	90.6224	48.0388	116.826	0.545067	0.620182
abcb5	ENSDARG00000021787	798527	96.4874	133.929	407.657	125.329	79.724	281.174	-0.391753	0.726565
abcb6a	ENSDARG00000063297	564067	112.413	87.0052	80.1627	60.7363	85.8566	88.1145	-0.253118	0.769315
abcb6b	ENSDARG00000074254	100004801	69.3211	105.579	68.4316	44.3471	178.868	127.717	0.52776	0.571504
abcb7	ENSDARG00000062795	566515	235.13	268.836	256.13	191.85	399.642	266.324	0.174197	0.824693
abcb8	ENSDARG00000056672	548340	152.694	177.921	126.11	48.2034	150.249	128.707	-0.482048	0.561293
abcb9	ENSDARG00000109326	570148	74.9417	46.9242	75.2747	22.1736	38.8399	25.7413	-1.18571	0.109984
abcc1	ENSDARG00000104719	100002010	246.371	220.935	185.743	291.149	405.775	227.712	0.501391	0.394138
abcc10	ENSDARG00000113210	556709	136.769	97.7587	63.5436	79.0536	181.934	106.925	0.302682	0.74824
abcc12	ENSDARG00000013050	568482	14.9883	35.1931	58.6556	26.9939	14.3094	43.5622	-0.357322	0.802411
abcc13	ENSDARG00000062519	559093	44.0282	14.6638	34.2158	6.74848	5.11051	9.9005	-2.09383	0.0488187
abcc2	ENSDARG00000116140	393561	41.2179	62.5655	175.967	32.7783	16.3536	40.5921	-1.63922	0.0491044
abcc3	ENSDARG00000096662	323301	460.891	503.457	547.453	636.285	990.417	859.364	0.717546	0.10474
abcc4	ENSDARG00000115375	368620	120.843	194.54	195.519	401.052	247.349	203.95	0.738894	0.209783
abcc5	ENSDARG00000061233	336147	3316.17	3984.64	5028.74	5624.37	6014.05	4612.65	0.398424	0.429051
abcc6a	ENSDARG00000016750	566555	71.1946	52.7897	32.2606	47.2393	170.691	146.527	1.2208	0.109048
abcc6b.2	ENSDARG00000094901	100002917	47.7753	74.2966	37.1486	86.7661	14.3094	61.3831	0.03034	0.984947
abcc8	ENSDARG00000114458	553281	146.136	68.4311	218.003	157.143	65.4145	77.2239	-0.528401	0.562105
abcc8b	ENSDARG00000077007	100329706	152.694	144.683	36.171	49.1675	33.7294	52.4727	-1.30082	0.0941935
abcc9	ENSDARG00000015985	561160	75.8785	35.1931	38.1262	887.907	463.012	778.18	3.83355	3.52158e-14
abcd1	ENSDARG00000074876	566367	44.0282	31.2828	12.7087	25.0658	54.1714	32.6717	0.344431	0.797874
abcd3a	ENSDARG00000110888	406803	369.088	425.25	645.212	269.939	548.869	365.329	-0.281925	0.706436
abcd3b	ENSDARG00000002947	100170781	24.356	50.8345	3.91038	92.5505	25.5526	50.4926	1.09262	0.375126
abcd4	ENSDARG00000061770	767748	125.527	169.122	181.832	138.826	280.056	144.547	0.241562	0.772362
abce1	ENSDARG00000007216	406324	1181.27	2248.45	1620.85	1824.98	1762.1	1960.3	0.13541	0.848992
abcf1	ENSDARG00000031795	406467	732.555	1421.41	1401.87	1074.94	1110	1406.86	0.0145873	0.986651
abcf2a	ENSDARG00000038785	336770	547.074	984.43	578.736	700.878	803.372	1077.17	0.290811	0.666977
abcf2b	ENSDARG00000052331	100000576	14.0516	4.88793	4.88797	8.67661	2.0442	13.8607	0.0445175	0.987348
abcf3	ENSDARG00000089705	100331227	102.108	127.086	97.7594	105.083	118.564	86.1344	-0.0779053	0.935004
abcg1	ENSDARG00000063475	556979	366.278	157.391	76.2523	65.5566	68.4809	49.5025	-1.70915	0.012165
abcg2a	ENSDARG00000100075	735312	50.5856	85.05	188.676	21.2095	14.3094	36.6319	-2.1672	0.00402267
abcg2c	ENSDARG00000058574	569858	345.669	494.659	328.472	482.034	718.538	475.224	0.519761	0.341437
abcg2d	ENSDARG00000016818	735310	156.441	212.136	53.7677	44.3471	23.5084	66.3334	-1.65356	0.0251704
abcg4a	ENSDARG00000061047	564842	24.356	11.731	13.6863	14.461	2.0442	14.8508	-0.665027	0.713314
abcg4b	ENSDARG00000078068	794238	73.0681	87.9828	49.8573	18.3173	14.3094	10.8906	-2.2761	0.00109896
abcg5	ENSDARG00000115809	557317	6.5574	0.977587	10.7535	10.6047	0	6.93035	-0.0580192	1
abcg8	ENSDARG00000063059	100136850	15.9251	5.86552	9.77594	2.8922	11.2431	1.9801	-0.97525	1
abch1	ENSDARG00000111253	558667	52.4592	53.7673	66.4764	49.1675	81.7682	53.4627	0.0939865	0.934508
abhd10a	ENSDARG00000076435	568517	12.178	8.79828	16.6191	1.92814	0	9.9005	-1.66638	0.414277
abhd10b	ENSDARG00000116787	492622	73.0681	174.01	217.026	159.071	326.051	246.523	0.656866	0.373747
abhd11	ENSDARG00000069501	446169	219.204	199.428	415.477	159.071	234.061	230.682	-0.419188	0.555863
abhd12	ENSDARG00000071004	767657	14.9883	28.35	39.1038	46.2753	30.6631	32.6717	0.41263	0.735374
abhd13	ENSDARG00000059209	561333	60.8901	33.2379	32.2606	50.1315	62.3482	61.3831	0.458803	0.632118
abhd14a	ENSDARG00000058367	404598	41.2179	53.7673	31.283	36.6346	53.1493	72.2737	0.359724	0.731569
abhd14b	ENSDARG00000100531	393338	66.5107	63.5431	112.423	93.5146	226.907	100.985	0.797041	0.281473
abhd15a	ENSDARG00000116294	560644	206.09	293.276	357.799	492.639	412.929	455.423	0.667292	0.180375
abhd16a	ENSDARG00000078929	564613	464.638	382.236	468.268	274.759	396.576	296.025	-0.443332	0.409558
abhd17aa	ENSDARG00000091433	322121	61.8269	63.5431	34.2158	69.4129	60.304	88.1145	0.448706	0.614312
abhd17ab	ENSDARG00000109731	100003419	597.66	505.412	555.273	796.32	1129.42	721.747	0.674762	0.137585
abhd17b	ENSDARG00000035571	437017	22.4825	17.5966	1.95519	21.2095	21.4641	17.8209	0.523731	0.765398
abhd17c	ENSDARG00000111161	393126	522.718	403.743	595.355	419.37	566.245	471.264	-0.0630384	0.935835
abhd18	ENSDARG00000101961	503769	89.93	68.4311	70.3868	46.2753	155.36	105.935	0.426132	0.65009
abhd2a	ENSDARG00000025797	393888	143.326	131.974	161.303	333.568	162.514	224.741	0.723706	0.20779
abhd2b	ENSDARG00000115068	559290	242.624	102.647	168.146	94.4787	107.321	32.6717	-1.13118	0.112537
abhd3	ENSDARG00000018809	447830	79.6255	71.3638	181.832	87.7302	93.0113	88.1145	-0.307668	0.742321
abhd4	ENSDARG00000102887	550276	208.9	188.674	227.779	820.422	576.466	343.548	1.47679	0.00167143
abhd5a	ENSDARG00000099189	566493	8.43094	7.82069	9.77594	20.2454	0	6.93035	0.0654418	0.982773
abhd6a	ENSDARG00000060756	799085	8.43094	15.6414	0	15.4251	2.0442	4.95025	-0.100251	1
abhd6b	ENSDARG00000111140	558995	21.5457	24.4397	12.7087	38.5627	50.083	34.6518	1.07012	0.241501
abhd8a		558563	38.4076	14.6638	33.2382	17.3532	2.0442	8.91045	-1.60462	0.203053
abhd8b	ENSDARG00000111960	101883400	81.4991	74.2966	58.6556	87.7302	65.4145	116.826	0.332189	0.702197
abi1a	ENSDARG00000010155	393711	192.975	198.45	162.281	466.609	293.343	271.274	0.897323	0.0677141
abi1b	ENSDARG00000062991	767738	245.434	227.778	491.73	57.8441	86.8787	57.4229	-2.25558	1.21033e-05
abi2a	ENSDARG00000111927	767646	290.399	341.178	263.95	348.029	569.311	482.155	0.643954	0.196259
abi2b	ENSDARG00000014875	692331	789.698	1000.07	1574.9	1285.1	1476.94	1393	0.304441	0.629441
abi3a	ENSDARG00000060072	767807	223.888	263.948	605.131	25.0658	75.6356	34.6518	-3.01509	1.12815e-06
abi3b	ENSDARG00000063283	566059	40.2812	112.422	167.169	29.8861	9.19892	48.5125	-1.86699	0.0281613
abi3bp	ENSDARG00000062156	101884149	62.7637	219.957	151.527	500.351	191.133	408.891	1.34202	0.0380872
abi3bpb	ENSDARG00000111438	100149890	2281.04	4104.89	2922.03	4303.6	10435.7	7890.7	1.2817	0.00782847
abl1	ENSDARG00000035187	100000720	104.918	77.2293	31.283	156.179	65.4145	96.0349	0.573493	0.539844
abl2	ENSDARG00000013841	570636	101.171	102.647	71.3644	72.3051	75.6356	65.3433	-0.367855	0.644661
ablim1a	ENSDARG00000060149	100003558	253.865	42.0362	161.303	23.1376	60.304	76.2339	-1.51862	0.0687011
ablim1b	ENSDARG00000112629	541550	1472.6	1754.77	2347.2	4156.1	6055.96	3977.03	1.34786	0.000731417
ablim2	ENSDARG00000109680	568454	213.584	153.481	236.578	160.999	155.36	154.448	-0.35859	0.581211
ablim3	ENSDARG00000112071	566821	699.768	328.469	282.525	215.951	209.531	202.96	-1.06076	0.0491793
abo	ENSDARG00000019207	563897	6.5574	5.86552	1.95519	6.74848	0	1.9801	-0.715403	1
abraa	ENSDARG00000038583	324520	29.9767	37.1483	17.5967	25.0658	2.0442	14.8508	-1.01072	0.476565
abrab	ENSDARG00000033854	445477	19.6722	5.86552	13.6863	25.0658	7.15472	4.95025	-0.0764126	0.975093
abracl	ENSDARG00000042876	336650	271.664	302.074	619.795	267.047	300.498	280.184	-0.493475	0.450547
abraxas2a	ENSDARG00000115196	449820	75.8785	98.7362	94.8266	147.502	124.696	105.935	0.489368	0.465565
abraxas2b	ENSDARG00000098907	406584	74.0049	73.319	71.3644	102.191	123.674	58.413	0.378143	0.656498
abt1	ENSDARG00000043666	553568	100.235	153.481	155.437	123.401	84.8345	138.607	-0.237713	0.774037
abtb1	ENSDARG00000063354	100536189	46.8386	63.5431	60.6108	27.958	69.503	56.4329	-0.152755	0.897431
abtb2a	ENSDARG00000059751	559451	30.9134	14.6638	19.5519	50.1315	30.6631	52.4727	1.03215	0.262053
abtb2b	ENSDARG00000111540	100007078	137.705	153.481	116.334	402.98	700.14	350.478	1.83449	5.92678e-05
acaa1	ENSDARG00000004687	431754	69.3211	120.243	218.981	80.0177	212.597	195.04	0.255377	0.807814
acaa2	ENSDARG00000038881	406325	289.462	350.954	338.248	153.287	667.433	555.418	0.491575	0.54798
acaca	ENSDARG00000114071	559403	506.793	619.79	789.896	498.423	537.626	492.055	-0.32666	0.56551
acacb	ENSDARG00000061994	556236	370.961	393.967	364.643	625.68	1163.15	700.956	1.14013	0.00892835
acad11	ENSDARG00000045411	393147	55.2695	90.9156	103.625	92.5505	94.0334	87.1244	0.132346	0.892972
acad8	ENSDARG00000116771	394130	125.527	118.288	217.026	109.904	187.045	225.732	0.181588	0.843397
acad9	ENSDARG00000055620	724002	105.855	77.2293	123.177	105.083	149.227	115.836	0.272942	0.735066
acadl	ENSDARG00000115321	394156	483.374	414.497	620.772	558.195	871.853	705.906	0.492016	0.353952
acadm	ENSDARG00000038900	406283	830.916	915.021	1258.16	1935.85	2373.32	1825.65	1.03011	0.0091631
acads	ENSDARG00000030781	445288	131.148	188.674	310.875	163.892	335.25	284.144	0.312595	0.710107
acadsb	ENSDARG00000098174	100037342	94.6139	57.6776	97.7594	84.838	121.63	80.1941	0.196509	0.833821
acadvl	ENSDARG00000016687	573723	295.083	324.559	263.95	282.472	497.764	382.159	0.395426	0.511545
acana	ENSDARG00000035891	497505	236.066	243.419	102.647	7397.29	3713.3	3821.59	4.68078	1.45865e-19
acanb	ENSDARG00000113408	559593	40.2812	29.3276	10.7535	645.926	365.913	659.374	4.37623	1.1507e-14
acap1	ENSDARG00000109603	561771	66.5107	147.616	211.16	80.9817	85.8566	73.2637	-0.824413	0.249793
acap2	ENSDARG00000060783	100124613	29.0399	52.7897	41.0589	110.868	100.166	80.1941	1.24571	0.0451727
acap3a	ENSDARG00000075990	322991	44.965	26.3948	9.77594	56.88	30.6631	16.8309	0.362852	0.807575
acap3b	ENSDARG00000099240	100009646	51.5224	39.1035	56.7005	53.9878	15.3315	38.612	-0.447392	0.696123
acat1	ENSDARG00000045888	445290	545.201	377.348	421.343	450.22	796.218	623.732	0.476508	0.396855
acat2	ENSDARG00000007127	30643	222.952	195.517	275.682	88.6943	251.437	136.627	-0.542611	0.455184
acbd3	ENSDARG00000042623	406270	450.587	431.116	658.898	517.705	757.378	563.339	0.254923	0.698307
acbd4	ENSDARG00000027070	406368	24.356	22.4845	53.7677	28.922	42.9283	20.7911	-0.119208	0.937946
acbd5a	ENSDARG00000034883	553674	209.837	91.8931	155.437	77.1254	162.514	107.916	-0.396372	0.640867
acbd5b	ENSDARG00000058410	100004736	12.178	0.977587	1.95519	4.82034	0	0	-1.64229	1
acbd6	ENSDARG00000039456	324090	207.026	196.495	193.564	238.125	269.835	191.08	0.227288	0.738269
acbd7	ENSDARG00000094730	619256	303.514	354.864	496.618	17.3532	47.0167	109.896	-2.72894	2.55325e-05
accs	ENSDARG00000052124	541510	172.366	149.571	138.818	73.2692	164.558	95.0448	-0.469921	0.524296
acd	ENSDARG00000078055	794664	153.63	142.728	175.967	139.79	192.155	148.508	0.0243527	0.979484
ace	ENSDARG00000079166	565980	133.958	220.935	141.751	379.843	576.466	529.677	1.58125	0.000331383
ace2	ENSDARG00000016918	492331	6.5574	24.4397	177.922	36.6346	0	10.8906	-2.13528	0.521803
acer1	ENSDARG00000010347	550266	30.9134	17.5966	38.1262	6.74848	18.3978	17.8209	-1.01371	0.392428
acer2	ENSDARG00000077782	100331179	26.2296	12.7086	2.93278	18.3173	7.15472	18.811	0.080041	0.972411
acer3	ENSDARG00000093366	555411	12.178	14.6638	10.7535	14.461	11.2431	7.9204	-0.160379	0.937946
ache	ENSDARG00000031796	114549	835.6	424.273	1266.96	216.915	378.178	263.353	-1.55774	0.00294801
acin1a	ENSDARG00000111685	368893	6451.54	7754.22	5422.71	8525.25	9111.02	8317.41	0.402991	0.390272
acin1b	ENSDARG00000026842	327495	1140.99	1175.06	1085.13	932.254	1182.57	1291.03	0.00194265	0.998275
ackr3a	ENSDARG00000062478	100000764	35.5973	33.2379	18.5743	38.5627	74.6135	80.1941	1.14436	0.150777
ackr3b	ENSDARG00000113530	561050	890.869	1446.83	1283.58	3663.46	7078.06	4245.34	2.04915	1.23138e-06
ackr4a	ENSDARG00000078729	100003167	19.6722	35.1931	31.283	24.1017	91.9892	117.816	1.44124	0.0932104
ackr4b	ENSDARG00000040133	641390	59.0166	68.4311	80.1627	211.131	163.536	262.363	1.61798	0.000724783
aclya	ENSDARG00000099079	436922	243.56	279.59	428.186	222.7	346.493	311.866	-0.110769	0.894758
aclyb	ENSDARG00000055652	794259	35.5973	42.0362	60.6108	63.6285	89.945	45.5423	0.526409	0.561701
acmsd	ENSDARG00000062549	557166	8.43094	17.5966	31.283	2.8922	0	14.8508	-1.6894	0.350055
aco1	ENSDARG00000026376	568448	322.249	376.371	403.746	557.231	724.671	516.806	0.706353	0.11412
aco2	ENSDARG00000111879	322670	1708.67	1514.28	1947.37	929.362	1591.41	1624.67	-0.318781	0.593702
acot11a	ENSDARG00000058229	554842	11.2413	11.731	13.6863	19.2814	15.3315	4.95025	0.110666	0.960045
acot11b	ENSDARG00000042122	641574	30.9134	18.5741	14.6639	36.6346	22.4862	14.8508	0.205208	0.897361
acot12	ENSDARG00000054534	100536873	12.178	24.4397	19.5519	22.1736	15.3315	9.9005	-0.243079	0.887387
acot13	ENSDARG00000114746	564010	55.2695	87.9828	156.415	88.6943	78.7019	71.2836	-0.327654	0.729431
acot14	ENSDARG00000110067	557184	119.907	140.772	149.572	235.233	548.869	242.562	1.32322	0.0132269
acot15	ENSDARG00000111748	557032	160.188	153.481	217.026	656.53	808.483	393.05	1.80788	5.73969e-05
acot16	ENSDARG00000113784	402867	9.36771	4.88793	16.6191	11.5688	1.0221	6.93035	-0.657644	0.773778
acot17	ENSDARG00000112174	572757	13.1148	5.86552	10.7535	0	9.19892	3.9602	-1.18193	1
acot18	ENSDARG00000112227	556673	69.3211	97.7587	106.558	89.6583	152.293	140.587	0.483326	0.506153
acot19	ENSDARG00000040427	492778	18.7354	12.7086	18.5743	13.497	7.15472	17.8209	-0.377757	0.822785
acot20	ENSDARG00000042510	553440	151.757	126.109	269.816	187.993	248.371	218.801	0.258526	0.746124
acot21	ENSDARG00000042513	562047	16.8619	10.7535	5.86556	9.64068	1.0221	9.9005	-0.701425	0.74717
acot22	ENSDARG00000058945	553217	19.6722	14.6638	5.86556	5.78441	4.08841	14.8508	-0.7017	0.715298
acot7	ENSDARG00000018653	447878	36.5341	19.5517	58.6556	39.5268	23.5084	29.7015	-0.30629	0.811935
acot8	ENSDARG00000014138	450052	37.4708	21.5069	46.9245	90.6224	48.0388	27.7214	0.652326	0.535976
acot9.1	ENSDARG00000114328	798073	169.556	131.974	234.623	156.179	485.499	265.334	0.758176	0.267638
acot9.2	ENSDARG00000113544	798008	11.2413	10.7535	21.5071	8.67661	8.17682	3.9602	-1.06296	0.511726
acox1	ENSDARG00000014727	449662	462.765	390.057	569.937	670.991	1073.21	683.135	0.770591	0.103773
acox3	ENSDARG00000038865	406421	52.4592	56.7	67.454	167.748	229.973	69.3035	1.40287	0.0282805
acoxl	ENSDARG00000020149	569104	22.4825	3.91035	12.7087	28.922	2.0442	2.97015	-0.202551	0.940371
acp1	ENSDARG00000076486	541489	189.228	236.576	258.085	233.304	238.15	246.523	0.0703375	0.930025
acp2	ENSDARG00000007244	503759	59.9534	53.7673	22.4847	36.6346	134.917	101.975	1.0047	0.253158
acp5a	ENSDARG00000111996	406801	37.4708	149.571	70.3868	25.0658	67.4587	45.5423	-0.899348	0.335753
acp5b	ENSDARG00000109721	436725	15.9251	62.5655	14.6639	33.7424	26.5747	25.7413	-0.113168	0.948632
acp6	ENSDARG00000040064	558758	45.9018	45.9466	43.0141	37.5987	68.4809	29.7015	0.00874117	0.994699
acrc	ENSDARG00000101060	541448	106.792	181.831	114.378	89.6583	188.067	189.1	0.211921	0.816671
acsbg1	ENSDARG00000062077	100006023	16.8619	3.91035	5.86556	9.64068	0	0	-1.46088	1
acsbg2	ENSDARG00000004094	335159	923.656	876.895	1377.43	397.196	766.577	443.543	-0.983616	0.0432686
acsf2	ENSDARG00000061201	751707	227.635	350.954	309.897	403.945	1317.49	913.817	1.56851	0.00293746
acsf3	ENSDARG00000114624	562292	44.0282	80.1621	65.4988	27.958	65.4145	45.5423	-0.45013	0.651064
acsl1a	ENSDARG00000109220	555308	327.87	425.25	556.251	281.508	460.968	361.368	-0.246413	0.727172
acsl1b	ENSDARG00000003854	445175	91.8036	130.019	90.9162	161.963	142.072	158.408	0.564633	0.352348
acsl2	ENSDARG00000078399	100332846	127.401	171.078	135.886	22.1736	18.3978	17.8209	-2.89418	6.3396e-08
acsl3a	ENSDARG00000032079	567157	14.9883	15.6414	3.91038	7.71254	0	0	-2.15437	1
acsl3b	ENSDARG00000014674	559656	988.294	876.895	1174.09	792.464	788.041	705.906	-0.410637	0.39627
acsl4a	ENSDARG00000004078	393622	782.204	323.581	389.082	580.369	896.384	417.801	0.341583	0.669929
acsl4b	ENSDARG00000010752	334561	229.509	420.362	203.34	521.561	842.212	575.219	1.18435	0.0169387
acsl5	ENSDARG00000075931	447860	3.74708	1.95517	23.4623	1.92814	5.11051	4.95025	-1.28351	1
acsl6		566863	627.637	395.923	669.652	111.832	55.1935	48.5125	-2.97269	2.39574e-09
acsm3	ENSDARG00000004880	100002035	137.705	126.109	96.7818	362.49	769.643	344.538	2.0335	3.49917e-05
acss1	ENSDARG00000109700	541435	144.263	247.329	151.527	304.646	442.57	233.652	0.85281	0.124911
acss2	ENSDARG00000112371	436914	510.54	422.317	567.982	174.496	449.725	497.995	-0.419632	0.565867
acss2l	ENSDARG00000069029	560020	12.178	24.4397	5.86556	17.3532	0	18.811	-0.230234	0.93022
acss3	ENSDARG00000032218	566019	73.0681	93.8483	114.378	104.119	134.917	138.607	0.425103	0.552724
acta1a	ENSDARG00000036371	550445	527.402	610.014	267.861	788.608	940.334	608.881	0.734226	0.183399
acta1b	ENSDARG00000055618	407658	162.998	88.9604	268.838	272.831	577.488	138.607	0.92497	0.237962
acta2	ENSDARG00000045180	322509	167.682	299.142	261.995	4348.91	4062.86	4693.83	4.1688	8.73944e-26
actb1	ENSDARG00000113649	57934	27600.1	33107.9	17598.6	46861.4	90851.6	57409.1	1.31717	0.00342953
actb2	ENSDARG00000037870	57935	49353.8	72994.4	69534.3	176812	177170	129598	1.33353	0.000347217
actc1a	ENSDARG00000042535	408256	879.628	1529.92	1519.18	319.107	1035.39	254.443	-1.28813	0.0451727
actc1b	ENSDARG00000099197	58114	1371.43	1849.59	2890.75	1773.89	3413.82	2045.44	0.243026	0.74882
actl6a	ENSDARG00000115348	192313	576.114	609.036	974.661	479.142	699.118	602.941	-0.278091	0.672839
actl6b	ENSDARG00000034107	553775	15.9251	11.731	44.9693	5.78441	2.0442	0	-3.20652	0.0273726
actn1	ENSDARG00000007219	560400	446.84	974.654	878.857	2335.94	3041.78	2418.69	1.76105	3.97774e-05
actn2a		100538165	19.6722	12.7086	10.7535	7.71254	18.3978	15.8408	-0.0426007	0.983719
actn2b	ENSDARG00000111435	641575	117.096	74.2966	67.454	68.4488	30.6631	17.8209	-1.14545	0.162072
actn3a	ENSDARG00000111128	58037	67.4475	53.7673	94.8266	56.88	116.52	59.403	0.107102	0.92723
actn3b	ENSDARG00000001431	323320	113.349	97.7587	108.513	95.4427	269.835	113.856	0.583378	0.452118
actn4	ENSDARG00000099786	322221	798.129	539.628	702.89	939.002	1520.89	981.14	0.753681	0.108436
actr1	ENSDARG00000011611	406681	1058.55	1288.46	1743.05	1198.34	1732.46	1508.84	0.118318	0.870731
actr10	ENSDARG00000038432	393139	349.416	189.652	281.547	218.843	570.333	477.204	0.625578	0.345828
actr2a	ENSDARG00000052438	406820	764.405	916.976	1252.3	995.882	1156	1007.87	0.107131	0.880507
actr2b	ENSDARG00000070076	554861	44.965	35.1931	28.3502	18.3173	45.9946	29.7015	-0.208799	0.876426
actr3	ENSDARG00000091138	406250	14.0516	14.6638	2.93278	5.78441	19.4199	12.8707	0.264143	0.905474
actr3b	ENSDARG00000008790	100038776	12.178	5.86552	4.88797	15.4251	7.15472	1.9801	0.0990524	1
actr5	ENSDARG00000098235	406809	67.4475	75.2742	60.6108	162.928	166.603	65.3433	0.957506	0.154527
actr6	ENSDARG00000021370	324822	134.895	167.167	244.398	120.509	223.84	251.473	0.124712	0.89499
actr8	ENSDARG00000103610	326866	140.516	144.683	174.989	124.365	209.531	107.916	-0.059175	0.953247
acvr1ba	ENSDARG00000018968	30183	1652.46	1175.06	1555.35	312.358	645.969	537.597	-1.55105	0.0003151
acvr1bb	ENSDARG00000052142	559222	37.4708	31.2828	15.6415	4.82034	7.15472	27.7214	-1.08876	0.424211
acvr1c	ENSDARG00000086172	100331105	59.9534	56.7	19.5519	15.4251	4.08841	25.7413	-1.58825	0.136506
acvr1l	ENSDARG00000014986	30615	486.184	368.55	421.343	299.825	671.521	506.906	0.211906	0.778689
acvr2aa	ENSDARG00000011188	553359	1546.61	1415.55	1533.84	1254.25	1501.47	1276.18	-0.157222	0.788507
acvr2ab	ENSDARG00000104700	100331014	1075.41	1379.37	870.059	1052.76	1330.78	1370.23	0.175028	0.788566
acvr2b	ENSDARG00000044422	30457	704.452	796.733	633.481	569.764	660.278	651.453	-0.182172	0.763639
acvrl1	ENSDARG00000018179	266753	172.366	288.388	312.83	982.385	1253.1	755.409	1.95116	5.64572e-06
acy1	ENSDARG00000038475	393970	181.734	168.145	262.973	163.892	238.15	203.95	-0.0163812	0.986068
acy3.1	ENSDARG00000093003	791456	11.2413	57.6776	63.5436	47.2393	33.7294	37.6219	-0.15816	0.916977
acy3.2	ENSDARG00000005525	436619	26.2296	81.1397	85.0507	101.227	61.3261	90.0946	0.394117	0.702008
acyp1	ENSDARG00000060126	571263	84.3094	46.9242	125.132	174.496	101.188	72.2737	0.441109	0.638012
acyp2	ENSDARG00000086271	101886626	11.2413	53.7673	6.84316	8.67661	2.0442	22.7712	-1.09945	0.528628
ada	ENSDARG00000003113	436919	104.918	102.647	208.228	38.5627	227.929	107.916	-0.15183	0.907163
adad1	ENSDARG00000089181	564818	14.0516	17.5966	5.86556	0	1.0221	5.9403	-2.43113	1
adad2	ENSDARG00000105626	558824	6.5574	11.731	3.91038	7.71254	1.0221	0	-1.33946	1
adal	ENSDARG00000111306	619263	45.9018	43.9914	73.3195	62.6644	65.4145	53.4627	0.153796	0.887387
adam10a	ENSDARG00000053468	566044	1207.5	1568.05	1672.66	2142.16	3343.3	2703.83	0.880515	0.0331388
adam10b	ENSDARG00000015502	393392	43.0915	33.2379	15.6415	54.9519	19.4199	27.7214	0.151137	0.922988
adam11	ENSDARG00000079204	567145	32.787	14.6638	23.4623	1.92814	0	2.97015	-3.84716	0.00455465
adam12	ENSDARG00000079068	563275	108.665	168.145	142.729	275.723	335.25	233.652	1.0097	0.0350838
adam15	ENSDARG00000089213	795199	72.1314	77.2293	47.9021	53.0237	36.7957	33.6617	-0.675324	0.409849
adam17a	ENSDARG00000043213	324142	430.915	458.488	623.705	428.046	866.743	545.518	0.282323	0.689045
adam17b	ENSDARG00000093093	560657	49.6489	46.9242	14.6639	73.2692	21.4641	58.413	0.461618	0.715305
adam19a		565342	209.837	341.178	310.875	1282.21	1115.11	624.722	1.81014	5.4154e-05
adam19b	ENSDARG00000067545	571252	169.556	113.4	179.877	107.976	198.288	120.786	-0.116687	0.901157
adam22	ENSDARG00000060532	100126805	220.141	56.7	143.706	40.4909	12.2652	17.8209	-2.57286	0.000531782
adam23a	ENSDARG00000062323	794175	1055.74	595.35	1581.75	83.8739	42.9283	65.3433	-4.07153	3.64387e-15
adam28	ENSDARG00000109685	767749	14.0516	10.7535	23.4623	12.5329	15.3315	7.9204	-0.431987	0.80041
adam8a	ENSDARG00000001452	368917	210.774	178.898	62.566	1833.66	1425.83	1099.95	3.26863	3.23675e-10
adam8b	ENSDARG00000057644	100005593	43.0915	60.6104	9.77594	62.6644	79.724	73.2637	0.925871	0.334447
adam9	ENSDARG00000010070	447940	11.2413	17.5966	6.84316	46.2753	28.6189	23.7612	1.46807	0.154408
adamts1	ENSDARG00000103519	565145	457.144	597.305	238.533	1525.16	3639.71	1704.87	2.40949	3.21642e-06
adamts10	ENSDARG00000075188	564734	192.975	312.828	252.219	1058.55	2149.48	1241.52	2.55346	7.04373e-09
adamts12	ENSDARG00000067549	100003937	43.0915	43.9914	35.1934	165.82	171.713	154.448	2.00821	3.02764e-05
adamts13	ENSDARG00000076270	100320289	13.1148	11.731	21.5071	9.64068	7.15472	7.9204	-0.906017	0.55818
adamts15a	ENSDARG00000111736	569571	102.108	140.772	108.513	285.364	303.564	152.468	1.07728	0.0428948
adamts17	ENSDARG00000075555	101884120	177.987	276.657	161.303	508.064	859.588	759.369	1.78798	4.77712e-05
adamts18	ENSDARG00000001999	100150128	76.8152	50.8345	41.0589	43.3831	9.19892	12.8707	-1.36361	0.158334
adamts2	ENSDARG00000075930	571682	125.527	172.055	85.0507	191.85	498.786	282.164	1.34591	0.0186004
adamts3	ENSDARG00000060127	102467218	58.0798	57.6776	21.5071	286.328	132.873	147.518	2.04541	0.000944481
adamts5	ENSDARG00000100307	565053	39.3444	25.4173	25.4174	48.2034	21.4641	31.6816	0.16892	0.903545
adamts6	ENSDARG00000041982	569099	55.2695	80.1621	46.9245	82.9099	88.9229	86.1344	0.500546	0.51825
adamts7	ENSDARG00000102478	560364	70.2578	73.319	44.9693	120.509	150.249	123.756	1.06469	0.0597563
adamts8a	ENSDARG00000115086	569618	135.832	160.324	60.6108	176.424	230.995	202.96	0.774424	0.228263
adamts9	ENSDARG00000077778	100333407	30.9134	52.7897	23.4623	137.862	62.3482	96.0349	1.46785	0.033061
adamtsl2	ENSDARG00000074033	100537087	35.5973	36.1707	9.77594	24.1017	18.3978	15.8408	-0.483173	0.735967
adamtsl3	ENSDARG00000027903	100534944	94.6139	133.929	55.7229	204.382	234.061	268.304	1.3139	0.0133774
adamtsl4	ENSDARG00000063407	100333903	47.7753	33.2379	27.3726	87.7302	32.7073	55.4428	0.698649	0.459543
adamtsl5	ENSDARG00000052118	101886605	41.2179	43.9914	47.9021	24.1017	38.8399	44.5523	-0.308915	0.778333
adamtsl7	ENSDARG00000055439	556634	24.356	39.1035	19.5519	98.3349	57.2377	72.2737	1.45757	0.0372153
adap2	ENSDARG00000070565	100331455	43.0915	73.319	69.4092	26.9939	15.3315	15.8408	-1.6736	0.0238978
adar	ENSDARG00000012389	58119	490.868	342.155	483.909	314.286	420.084	319.786	-0.321302	0.596058
adarb1a	ENSDARG00000041609	58134	284.778	296.209	426.231	117.616	114.475	144.547	-1.41898	0.00119203
adarb1b	ENSDARG00000003544	558759	80.5623	64.5207	101.67	62.6644	26.5747	43.5622	-0.892453	0.23698
adarb2	ENSDARG00000071823	558149	49.6489	28.35	19.5519	19.2814	25.5526	25.7413	-0.468534	0.708325
adat1	ENSDARG00000061348	792614	53.396	52.7897	43.0141	64.5926	77.6798	65.3433	0.476235	0.55875
adat2	ENSDARG00000041944	100034610	59.9534	75.2742	78.2075	55.916	67.4587	58.413	-0.231545	0.8018
adat3	ENSDARG00000005640	368634	31.8502	39.1035	76.2523	40.4909	60.304	29.7015	-0.173883	0.892651
adck1	ENSDARG00000062561	100144553	32.787	32.2604	16.6191	17.3532	30.6631	26.7314	-0.129119	0.93385
adck2	ENSDARG00000112576	572087	69.3211	39.1035	18.5743	22.1736	15.3315	35.6418	-0.796311	0.483207
adck3	ENSDARG00000020123	437001	422.484	563.09	467.29	944.787	677.654	783.13	0.727627	0.0948392
adck4	ENSDARG00000113287	799071	129.274	127.086	119.266	125.329	213.619	122.766	0.297197	0.700808
adck5	ENSDARG00000075405	100001584	66.5107	125.131	108.513	68.4488	84.8345	92.0747	-0.290575	0.738101
adcy1a	ENSDARG00000069026	557026	32.787	18.5741	32.2606	18.3173	4.08841	6.93035	-1.50753	0.204201
adcy1b	ENSDARG00000088634	569499	29.9767	21.5069	7.82075	10.6047	0	7.9204	-1.67492	0.316907
adcy2a	ENSDARG00000058392	563724	63.7004	32.2604	40.0814	26.9939	65.4145	55.4428	0.118426	0.929436
adcy2b	ENSDARG00000014588	557902	138.642	100.691	204.317	70.377	71.5472	73.2637	-1.04378	0.0706233
adcy3a	ENSDARG00000077145	571825	47.7753	29.3276	26.395	33.7424	11.2431	45.5423	-0.192725	0.897828
adcy3b	ENSDARG00000017437	564719	23.4193	5.86552	14.6639	12.5329	0	4.95025	-1.32588	0.5121
adcy5	ENSDARG00000091342	562619	57.143	36.1707	49.8573	49.1675	58.2598	34.6518	-0.0117776	0.992111
adcy6a	ENSDARG00000114782	570652	467.449	437.959	458.492	713.41	538.648	636.602	0.469699	0.325117
adcy6b	ENSDARG00000111136	560807	52.4592	48.8793	46.9245	73.2692	55.1935	79.204	0.486314	0.552753
adcy7	ENSDARG00000060070	568726	58.0798	59.6328	63.5436	73.2692	188.067	173.259	1.26124	0.0402414
adcy8	ENSDARG00000031783	100148976	145.2	42.0362	159.348	24.1017	5.11051	2.97015	-3.42382	0.000145322
adcy9	ENSDARG00000100869	100333702	253.865	269.814	301.099	595.794	1067.07	806.891	1.58224	9.99546e-05
adcyap1a	ENSDARG00000004015	259257	38.4076	33.2379	132.953	20.2454	5.11051	25.7413	-1.99925	0.0385846
adcyap1b	ENSDARG00000027740	335625	923.656	630.543	2201.54	255.478	114.475	77.2239	-3.06972	7.79736e-07
adcyap1r1a	ENSDARG00000105201	541315	11.2413	7.82069	7.82075	10.6047	0	0	-1.33589	1
adcyap1r1b	ENSDARG00000113350	555473	37.4708	26.3948	34.2158	4.82034	1.0221	2.97015	-3.46811	0.00116622
add1	ENSDARG00000103962	555511	912.415	1151.6	916.006	1596.5	2513.35	1845.45	0.998831	0.012978
add2	ENSDARG00000074581	570147	138.642	55.7224	120.244	24.1017	5.11051	7.9204	-3.07802	8.40844e-05
add3a	ENSDARG00000040874	556762	1678.69	2870.19	2508.51	6170.04	7046.37	6227.42	1.46213	0.000100313
add3b	ENSDARG00000114699	553243	31.8502	57.6776	110.468	321.035	176.824	201.97	1.80809	0.00291612
adgb	ENSDARG00000005595	555435	118.97	56.7	102.647	30.8502	12.2652	2.97015	-2.59173	0.00237344
adgra1		101884141	12.178	5.86552	8.79835	17.3532	5.11051	6.93035	0.132314	0.957644
adgra1a	ENSDARG00000113675	560847	75.8785	74.2966	96.7818	15.4251	7.15472	6.93035	-3.06101	1.10603e-05
adgra2	ENSDARG00000076994	560700	61.8269	106.557	44.9693	131.113	124.696	157.418	0.953972	0.132491
adgra3		100003592	245.434	320.648	271.771	982.385	939.312	786.1	1.69247	3.87421e-06
adgrb1a	ENSDARG00000075133	563527	620.142	218.979	668.674	120.509	72.5693	101.975	-2.353	1.35823e-05
adgrb1b	ENSDARG00000078529	100302472	472.133	331.402	849.529	54.9519	21.4641	45.5423	-3.75896	2.11205e-11
adgrb2		556993	1469.79	754.697	986.392	361.526	294.365	271.274	-1.79205	1.99002e-05
adgrb3	ENSDARG00000059832	566117	446.84	160.324	674.54	61.7004	25.5526	30.6916	-3.4404	7.35374e-08
adgrd1		791731	30.9134	52.7897	38.1262	95.4427	67.4587	98.015	1.09971	0.0957084
adgrd2	ENSDARG00000103067	571770	48.7121	36.1707	44.9693	36.6346	9.19892	3.9602	-1.38003	0.226459
adgre10	ENSDARG00000075855	569655	88.0565	1073.39	656.943	3866.88	287.211	1671.21	1.67971	0.396855
adgre13		100538238	5.62063	12.7086	6.84316	0.964068	2.0442	3.9602	-1.8539	1
adgre14	ENSDARG00000056062	108182849	11.2413	3.91035	5.86556	3.85627	2.0442	10.8906	-0.324516	1
adgre15	ENSDARG00000096588	100536619	24.356	14.6638	13.6863	7.71254	8.17682	5.9403	-1.27278	0.35381
adgre5b.2	ENSDARG00000104083	101882660	29.9767	12.7086	7.82075	21.2095	50.083	15.8408	0.783643	0.5726
adgre5b.3	ENSDARG00000089904	792970	31.8502	46.9242	43.0141	47.2393	69.503	61.3831	0.548588	0.528031
adgre9	ENSDARG00000096577	101883848	22.4825	10.7535	18.5743	3.85627	8.17682	10.8906	-1.17855	0.422263
adgrf11	ENSDARG00000075134	100537132	3.74708	3.91035	0	2.8922	4.08841	0.99005	0.0553747	1
adgrf3a	ENSDARG00000087870	101886922	29.0399	29.3276	31.283	8.67661	0	5.9403	-2.60934	0.0313339
adgrf3b	ENSDARG00000093008	565465	122.717	42.0362	52.7901	43.3831	74.6135	54.4528	-0.336602	0.756284
adgrf6	ENSDARG00000042829	565101	136.769	129.041	170.101	125.329	79.724	121.776	-0.414963	0.552918
adgrf7		613165	29.0399	17.5966	19.5519	29.8861	4.08841	12.8707	-0.496421	0.765278
adgrf8	ENSDARG00000093316	100537224	46.8386	67.4535	86.0283	26.9939	5.11051	10.8906	-2.21559	0.0084076
adgrg1	ENSDARG00000027222	324948	360.657	369.528	474.133	111.832	150.249	193.06	-1.40399	0.00143147
adgrg11	ENSDARG00000041413	563883	25.2928	7.82069	27.3726	3.85627	19.4199	12.8707	-0.745713	0.651069
adgrg2a	ENSDARG00000088137	101882832	57.143	91.8931	167.169	46.2753	79.724	109.896	-0.422622	0.667786
adgrg3	ENSDARG00000074782	799479	31.8502	84.0725	37.1486	6.74848	5.11051	3.9602	-3.27245	0.000282656
adgrg4a	ENSDARG00000105416	793963	17.7987	8.79828	3.91038	11.5688	0	12.8707	-0.318999	0.909275
adgrg6	ENSDARG00000054137	561970	273.537	297.186	139.796	212.095	1211.19	650.463	1.54508	0.0216166
adgrg7.1		101882620	14.0516	14.6638	5.86556	7.71254	2.0442	10.8906	-0.742368	0.715946
adgrl1.1		100334775	24.356	17.5966	6.84316	6.74848	16.3536	10.8906	-0.524431	0.765515
adgrl1a	ENSDARG00000089292	562531	248.244	137.84	131.975	51.0956	47.0167	56.4329	-1.7453	0.00101239
adgrl2a	ENSDARG00000069356	57987	1745.2	1657.01	1612.05	2934.62	4189.6	2921.64	1.00246	0.00779944
adgrl3.1	ENSDARG00000061121	560631	866.513	418.407	436.985	676.776	979.174	736.598	0.474313	0.449137
adgrl4	ENSDARG00000013653	406676	18.7354	14.6638	43.0141	101.227	99.1439	43.5622	1.67532	0.0319365
adgrv1	ENSDARG00000021137	415105	873.071	813.352	706.8	311.394	212.597	157.418	-1.81212	1.66918e-05
adh5	ENSDARG00000111574	116517	1220.61	2134.07	1880.89	3273.98	2621.69	2774.12	0.727707	0.103556
adh8a	ENSDARG00000113750	322482	14.9883	19.5517	29.3278	49.1675	32.7073	46.5324	1.00904	0.268563
adh8b	ENSDARG00000116820	402841	117.096	146.638	291.323	390.448	487.543	445.523	1.25393	0.0149009
adhfe1	ENSDARG00000053518	404618	89.93	91.8931	65.4988	140.754	254.503	205.931	1.28092	0.0129841
adi1	ENSDARG00000020448	324079	298.83	392.99	583.624	713.41	760.444	671.254	0.750189	0.12248
adipoqa	ENSDARG00000062228	562602	17.7987	10.7535	7.82075	18.3173	21.4641	10.8906	0.476461	0.773222
adipoqb	ENSDARG00000100086	751715	5.62063	1.95517	2.93278	1.92814	2.0442	4.95025	-0.237896	1
adipor1a	ENSDARG00000113136	436740	937.708	557.224	681.383	813.673	1464.67	775.21	0.488435	0.419464
adipor1b	ENSDARG00000042717	406821	292.273	213.114	369.531	204.382	237.128	187.12	-0.477051	0.419231
adipor2	ENSDARG00000101849	560140	642.625	885.693	584.601	2228.93	1570.97	1601.9	1.35427	0.000584363
adka	ENSDARG00000039429	368220	348.479	519.099	411.567	231.376	490.609	540.568	-0.0189316	0.984729
adkb	ENSDARG00000095947	322229	168.619	226.8	326.516	262.227	402.708	405.921	0.56891	0.342681
adm2a	ENSDARG00000111740	403114	22.4825	21.5069	7.82075	19.2814	4.08841	13.8607	-0.475003	0.791853
adm2b	ENSDARG00000078875	100322075	14.9883	4.88793	0	7.71254	2.0442	9.9005	-0.0172544	1
adma	ENSDARG00000015263	556502	59.0166	90.9156	141.751	778.003	886.163	466.314	2.86929	5.5293e-09
admb	ENSDARG00000069027	570100	91.8036	167.167	192.586	1113.5	1652.74	599.971	2.89847	1.64913e-08
admp	ENSDARG00000025372	140619	14.9883	11.731	0	21.2095	1.0221	6.93035	0.127319	0.968447
adnp2a	ENSDARG00000060937	100007394	178.923	171.078	233.645	216.915	235.084	219.791	0.20295	0.770466
adnp2b	ENSDARG00000028431	564171	800.939	981.497	841.708	918.757	1440.14	1107.87	0.401695	0.442665
adnpa	ENSDARG00000115617	564637	930.214	945.326	1194.62	511.92	956.688	780.16	-0.449286	0.419464
adnpb	ENSDARG00000115866	100330315	570.494	446.757	669.652	393.34	413.951	339.587	-0.5567	0.254096
adoa	ENSDARG00000042827	494091	239.813	175.966	168.146	225.592	412.929	371.269	0.789761	0.136559
adob	ENSDARG00000053571	406474	148.947	158.369	114.378	255.478	308.675	295.035	1.02659	0.0224386
adora1b	ENSDARG00000075694	100150997	22.4825	4.88793	7.82075	0.964068	8.17682	5.9403	-1.22789	0.547038
adora2aa	ENSDARG00000114856	561701	43.0915	24.4397	26.395	392.376	201.354	250.483	3.16676	1.44893e-09
adora2ab	ENSDARG00000058488	566118	36.5341	22.4845	44.9693	13.497	14.3094	19.801	-1.12733	0.256409
adora2b	ENSDARG00000002533	560100	59.0166	32.2604	44.9693	133.041	82.7903	83.1642	1.13358	0.0820889
adpgk	ENSDARG00000115539	557919	56.2063	43.9914	28.3502	24.1017	26.5747	41.5821	-0.479214	0.661385
adpgk2	ENSDARG00000062785	566398	22.4825	14.6638	12.7087	30.8502	18.3978	25.7413	0.588613	0.65245
adprh	ENSDARG00000040712	445059	55.2695	59.6328	101.67	236.197	284.144	196.03	1.72625	0.000488733
adprhl1	ENSDARG00000041589	450012	45.9018	32.2604	39.1038	48.2034	16.3536	29.7015	-0.313796	0.801829
adprhl2	ENSDARG00000110712	796446	251.991	223.867	304.032	146.538	148.205	132.667	-0.867644	0.0635273
adprm	ENSDARG00000026090	393393	36.5341	32.2604	27.3726	64.5926	9.19892	23.7612	0.0223087	0.989279
adra1aa	ENSDARG00000028725	798498	46.8386	35.1931	32.2606	95.4427	21.4641	86.1344	0.829493	0.392919
adra1ab	ENSDARG00000027638	557259	66.5107	84.0725	122.199	13.497	5.11051	6.93035	-3.41186	1.86327e-06
adra1ba	ENSDARG00000011317	100149100	42.1547	19.5517	15.6415	17.3532	16.3536	14.8508	-0.672844	0.60945
adra1bb	ENSDARG00000116032	492486	49.6489	46.9242	70.3868	112.796	38.8399	41.5821	0.211953	0.861119
adra1d	ENSDARG00000024101	568614	96.4874	116.333	171.079	689.309	556.024	461.364	2.15283	6.08211e-07
adra2a	ENSDARG00000111717	266750	44.965	63.5431	78.2075	102.191	67.4587	89.1045	0.471722	0.561701
adra2b	ENSDARG00000102096	266751	18.7354	12.7086	7.82075	35.6705	8.17682	34.6518	0.999388	0.458387
adra2c	ENSDARG00000110072	266752	23.4193	7.82069	13.6863	10.6047	4.08841	8.91045	-0.927554	0.580891
adra2da	ENSDARG00000091277	266754	40.2812	42.0362	32.2606	65.5566	149.227	99.005	1.45268	0.0214775
adra2db	ENSDARG00000116585	266755	14.9883	7.82069	5.86556	10.6047	4.08841	9.9005	-0.221243	0.92723
adrb1	ENSDARG00000115574	557194	19.6722	15.6414	5.86556	0	0	17.8209	-1.20846	0.642715
adrb2a	ENSDARG00000088124	565838	14.0516	12.7086	4.88797	5.78441	0	12.8707	-0.761098	0.756684
adrb2b	ENSDARG00000111730	100037315	34.6605	26.3948	12.7087	4.82034	16.3536	28.7115	-0.566044	0.720945
adrb3a	ENSDARG00000053646	558248	163.935	185.741	286.435	569.764	651.079	686.105	1.58412	0.000140101
adrb3b	ENSDARG00000052919	792519	24.356	28.35	10.7535	9.64068	4.08841	18.811	-0.962561	0.516039
adrbk2	ENSDARG00000104094	569403	82.4359	80.1621	56.7005	70.377	15.3315	34.6518	-0.863854	0.350125
adrm1	ENSDARG00000113912	796450	466.512	671.602	927.737	728.835	783.952	910.846	0.230529	0.736375
adsl	ENSDARG00000111547	334431	122.717	263.948	225.824	224.628	281.078	225.732	0.256266	0.740558
adss	ENSDARG00000002071	550502	8.43094	25.4173	12.7087	20.2454	5.11051	4.95025	-0.615582	0.744141
adssl	ENSDARG00000012399	192305	354.099	660.849	614.907	279.58	566.245	706.896	-0.0699549	0.944678
adssl1	ENSDARG00000099517	407989	29.9767	29.3276	26.395	30.8502	39.862	25.7413	0.169902	0.897828
aebp1	ENSDARG00000091726	793308	43.0915	45.9466	9.77594	61.7004	35.7736	51.4826	0.592003	0.613588
aebp2	ENSDARG00000006038	406815	441.219	354.864	517.147	408.765	477.322	287.115	-0.162753	0.822949
aep1	ENSDARG00000039099	503710	45.9018	18.5741	59.6332	215.951	346.493	316.816	2.82423	3.21788e-07
aes	ENSDARG00000115836	393395	107.729	149.571	123.177	141.718	88.9229	180.189	0.11125	0.907262
afap1	ENSDARG00000113963	568356	622.953	402.766	290.345	747.153	1793.79	884.115	1.37967	0.00922635
afap1l1a	ENSDARG00000116849	566757	115.223	142.728	217.026	478.178	752.267	482.155	1.85046	4.63722e-05
afap1l1b	ENSDARG00000056453	768144	59.9534	90.9156	75.2747	194.742	249.393	132.667	1.35106	0.0101928
afap1l2	ENSDARG00000074806	567369	184.544	223.867	229.735	1449.96	1165.2	1014.8	2.50819	1.24445e-11
aff1		100537394	21.5457	1.95517	1.95519	17.3532	11.2431	2.97015	0.307681	0.910734
aff2	ENSDARG00000052242	100330019	263.233	135.885	245.376	126.293	258.592	177.219	-0.197889	0.821712
aff3	ENSDARG00000079575	570215	146.136	118.288	78.2075	638.213	568.289	713.826	2.48616	2.84545e-09
aff4	ENSDARG00000001857	556421	1341.46	1340.27	1072.42	2236.64	2082.02	1791	0.702597	0.0793302
afg1la	ENSDARG00000011466	561238	88.9933	87.0052	112.423	60.7363	78.7019	61.3831	-0.522573	0.465561
afg1lb	ENSDARG00000042902	555926	79.6255	113.4	128.065	104.119	145.139	122.766	0.212494	0.799727
afg3l2	ENSDARG00000062272	569168	248.244	330.424	320.651	265.119	413.951	293.055	0.112209	0.885825
afmid	ENSDARG00000099106	550372	128.338	143.705	186.72	83.8739	106.299	109.896	-0.612534	0.310539
afp4	ENSDARG00000095863	568707	14.0516	33.2379	273.726	12.5329	1.0221	22.7712	-3.14149	0.0107209
aftpha	ENSDARG00000069249	556043	433.725	345.088	486.842	263.191	375.112	246.523	-0.516646	0.340541
aftphb	ENSDARG00000071347	100004990	41.2179	15.6414	0	17.3532	25.5526	15.8408	0.0451221	0.986028
aga	ENSDARG00000114305	566517	164.872	261.016	306.965	288.256	307.653	327.707	0.334014	0.613555
agap1	ENSDARG00000113863	100148154	1095.09	619.79	723.42	1066.26	1533.15	1287.07	0.672448	0.169132
agap2	ENSDARG00000099874	565109	262.296	181.831	706.8	36.6346	22.4862	38.612	-3.5568	1.54083e-08
agap3	ENSDARG00000087822	324332	625.763	538.65	756.658	631.465	604.062	483.145	-0.160597	0.80659
agbl1	ENSDARG00000104384	100536841	40.2812	26.3948	34.2158	29.8861	18.3978	23.7612	-0.485278	0.674952
agbl2	ENSDARG00000079983	568152	19.6722	17.5966	21.5071	18.3173	9.19892	11.8806	-0.575506	0.695308
agbl4	ENSDARG00000068050	550450	31.8502	18.5741	31.283	0.964068	5.11051	0	-3.764	0.00443191
agbl5	ENSDARG00000045900	445479	150.82	116.333	136.863	185.101	227.929	185.139	0.565798	0.309146
agfg1a	ENSDARG00000030020	327597	347.542	410.586	290.345	591.938	746.135	741.548	0.987976	0.015404
agfg1b	ENSDARG00000019526	393560	292.273	359.752	556.251	661.351	596.908	488.095	0.531562	0.34208
aggf1	ENSDARG00000060109	559905	227.635	279.59	264.928	305.61	229.973	211.871	-0.0466193	0.956961
agk	ENSDARG00000113514	334270	133.021	143.705	152.505	104.119	135.94	119.796	-0.254542	0.72845
agla	ENSDARG00000103811	567798	355.973	339.223	486.842	358.633	576.466	474.234	0.253636	0.705547
aglb	ENSDARG00000100352	553352	30.9134	14.6638	3.91038	5.78441	0	13.8607	-1.33198	0.514105
agmat	ENSDARG00000059700	556522	14.9883	8.79828	11.7311	9.64068	7.15472	10.8906	-0.359427	0.855087
agmo	ENSDARG00000025595	405819	212.647	403.743	487.819	703.77	748.179	747.488	0.994333	0.0399869
ago1	ENSDARG00000092644	570775	52.4592	48.8793	23.4623	15.4251	9.19892	18.811	-1.52183	0.0984236
ago2	ENSDARG00000061268	570630	923.656	1111.52	769.366	1090.36	1461.61	1440.52	0.50949	0.28781
ago3b	ENSDARG00000063079	568159	350.352	279.59	112.423	434.795	854.477	431.662	1.21265	0.043342
ago4	ENSDARG00000100854	100535764	173.303	150.548	155.437	133.041	61.3261	103.955	-0.683324	0.283058
agpat2	ENSDARG00000101139	777624	361.594	498.569	606.108	759.686	837.102	899.956	0.768009	0.0853508
agpat3	ENSDARG00000036549	406734	2550.83	1715.66	1577.84	2501.76	2078.96	2102.87	0.193558	0.760911
agpat4	ENSDARG00000069044	406265	204.216	233.643	304.032	197.634	203.398	132.667	-0.475088	0.437661
agpat5	ENSDARG00000063187	767778	217.331	255.15	355.844	270.903	480.388	376.219	0.444816	0.47818
agpat9l	ENSDARG00000112415	567414	8.43094	4.88793	16.6191	9.64068	29.641	28.7115	1.18292	0.389681
agps	ENSDARG00000042821	386801	38.4076	31.2828	22.4847	22.1736	28.6189	64.3533	0.320349	0.805228
agr1	ENSDARG00000060682	335309	47.7753	112.422	261.995	152.323	57.2377	138.607	-0.277335	0.817705
agr2	ENSDARG00000070480	335616	933.961	1156.48	1348.1	115.688	296.41	134.647	-2.65347	3.21083e-08
agrn	ENSDARG00000110127	565373	2327.88	2137	2860.44	2145.05	3143.99	2296.92	0.0504135	0.947273
agrp	ENSDARG00000116610	100149042	19.6722	50.8345	112.423	12.5329	2.0442	4.95025	-3.22104	0.00155795
agt	ENSDARG00000016412	322485	22.4825	29.3276	74.2971	46.2753	29.641	33.6617	-0.201329	0.884828
agtpbp1	ENSDARG00000105214	554164	33.7238	22.4845	21.5071	13.497	16.3536	20.7911	-0.618897	0.622653
agtr1a	ENSDARG00000018616	794575	19.6722	4.88793	1.95519	34.7065	100.166	50.4926	2.79936	0.00488923
agtr1b	ENSDARG00000045443	100333455	29.0399	17.5966	16.6191	29.8861	18.3978	28.7115	0.283292	0.842585
agtr2	ENSDARG00000035552	503772	169.556	350.954	366.598	1766.17	1943.02	1639.52	2.5923	1.03541e-09
agtrap	ENSDARG00000114680	793937	5.62063	22.4845	25.4174	16.3892	2.0442	15.8408	-0.639626	0.736023
agxt2	ENSDARG00000100709	619269	43.0915	53.7673	58.6556	141.718	89.945	61.3831	0.91486	0.193896
agxta	ENSDARG00000052099	436603	10.3045	7.82069	50.8349	17.3532	0	6.93035	-1.5014	0.412513
agxtb	ENSDARG00000018478	79378	43.0915	77.2293	348.023	43.3831	7.15472	105.935	-1.58097	0.159917
ahctf1	ENSDARG00000077530	553494	672.602	876.895	854.417	593.866	760.444	712.836	-0.217757	0.717635
ahcy	ENSDARG00000005191	387530	1493.21	3255.36	2125.29	2038.04	2842.47	3276.08	0.24686	0.730545
ahcyl1	ENSDARG00000056331	798918	544.264	608.059	1221.99	2199.04	2412.16	2687	1.6201	0.000267868
ahcyl2	ENSDARG00000039343	394240	265.106	258.083	197.474	319.107	509.007	373.249	0.736996	0.134843
ahdc1	ENSDARG00000093453	100536210	279.158	265.904	289.368	179.317	431.327	327.707	0.169016	0.837633
ahi1	ENSDARG00000044056	562701	394.381	505.412	343.135	531.202	474.255	617.792	0.385209	0.486893
ahnak	ENSDARG00000061764	559276	3494.16	5376.73	4719.82	9304.22	18725.9	12095.4	1.56191	0.000210362
ahr1a	ENSDARG00000020046	246224	18.7354	5.86552	1.95519	6.74848	1.0221	11.8806	-0.434887	1
ahr1b	ENSDARG00000023537	554265	63.7004	37.1483	8.79835	22.1736	5.11051	10.8906	-1.5203	0.220234
ahr2	ENSDARG00000021833	30517	1087.59	1462.47	1269.89	2262.67	3743.96	3059.26	1.24689	0.00138423
ahrra	ENSDARG00000099702	641291	39.3444	19.5517	21.5071	20.2454	25.5526	17.8209	-0.339381	0.805205
ahrrb	ENSDARG00000116560	565319	34.6605	22.4845	4.88797	17.3532	5.11051	16.8309	-0.658124	0.705269
ahsa1a	ENSDARG00000028664	565968	67.4475	210.181	65.4988	1034.45	208.509	455.423	2.30779	0.00102693
ahsa1b	ENSDARG00000100317	321945	187.354	1472.25	221.914	3408.94	307.653	2706.8	1.77148	0.364656
ahsg1	ENSDARG00000026764	569558	8.43094	3.91035	3.91038	67.4848	4.08841	11.8806	2.35958	0.104193
ahsg2	ENSDARG00000069293	567406	3.74708	11.731	9.77594	10.6047	1.0221	6.93035	-0.439924	1
aicda	ENSDARG00000015734	493784	3.74708	5.86552	0	9.64068	7.15472	6.93035	1.30315	1
aida	ENSDARG00000014532	393763	156.441	144.683	201.384	210.167	376.134	297.015	0.813597	0.119518
aif1l	ENSDARG00000009336	321033	882.438	869.075	1333.44	1765.21	1522.93	1524.68	0.641689	0.154564
aifm1	ENSDARG00000117164	373125	557.379	706.795	610.996	444.435	583.62	451.463	-0.341958	0.531702
aifm2	ENSDARG00000077549	557507	224.825	386.147	323.584	541.806	783.952	765.309	1.16201	0.00795741
aifm3	ENSDARG00000062780	100150876	23.4193	29.3276	21.5071	21.2095	0	2.97015	-1.6134	0.328086
aifm4	ENSDARG00000061634	791218	141.452	126.109	257.107	127.257	150.249	197.02	-0.144833	0.875634
aifm5	ENSDARG00000075551	557064	66.5107	29.3276	36.171	9.64068	26.5747	19.801	-1.23948	0.199056
aig1	ENSDARG00000007171	562261	116.16	36.1707	65.4988	8.67661	16.3536	7.9204	-2.72807	0.00063249
aim1a	ENSDARG00000031782	556848	347.542	577.754	479.999	620.86	896.384	738.578	0.682827	0.158073
aim1b	ENSDARG00000006060	566781	299.767	727.324	523.99	620.86	448.703	485.125	0.0035781	0.997297
aimp1	ENSDARG00000060036	562232	308.198	567.978	523.99	470.465	555.002	563.339	0.182459	0.799193
aimp2	ENSDARG00000018903	406647	149.883	163.257	227.779	347.065	242.238	215.831	0.574176	0.325391
aip	ENSDARG00000104437	334795	741.923	836.814	786.963	1146.28	2048.29	1639.52	1.03094	0.0123117
aipl1	ENSDARG00000110493	100537095	52.4592	24.4397	7.82075	4.82034	11.2431	13.8607	-1.504	0.24887
aire	ENSDARG00000056784	100007662	7.49417	10.7535	1.95519	7.71254	4.08841	1.9801	-0.550364	1
ajap1	ENSDARG00000038655	101887016	165.808	126.109	302.077	33.7424	40.8841	36.6319	-2.41686	1.1498e-05
ajuba	ENSDARG00000077842	572549	419.673	612.947	528.878	671.955	818.704	815.802	0.562803	0.231084
ak1	ENSDARG00000001950	445486	402.812	496.614	943.378	2386.07	1790.72	1356.37	1.58632	0.00089888
ak2	ENSDARG00000005926	321793	973.305	2355.98	1990.38	3600.79	2731.06	3038.46	0.816824	0.10951
ak3	ENSDARG00000058226	406404	201.406	281.545	333.36	378.879	491.631	404.931	0.643916	0.203473
ak4	ENSDARG00000006546	406590	238.877	205.293	154.46	355.741	464.034	483.145	1.12171	0.0102815
ak5	ENSDARG00000012555	100003595	26.2296	21.5069	36.171	13.497	14.3094	6.93035	-1.27253	0.245563
ak5l	ENSDARG00000017739	548336	46.8386	45.9466	118.289	31.8142	42.9283	8.91045	-1.33567	0.153776
ak7a	ENSDARG00000019001	402854	59.9534	26.3948	39.1038	22.1736	18.3978	0	-1.62866	0.216435
ak7b	ENSDARG00000017023	504040	33.7238	14.6638	16.6191	3.85627	5.11051	0	-2.86115	0.0439655
ak8	ENSDARG00000113361	553671	22.4825	15.6414	26.395	1.92814	4.08841	5.9403	-2.43433	0.0492736
akap10	ENSDARG00000059549	566920	338.174	484.883	631.526	626.644	553.979	482.155	0.193161	0.784305
akap11	ENSDARG00000075435	558595	332.554	261.016	475.111	507.1	420.084	331.667	0.236379	0.742202
akap12a	ENSDARG00000091792	101885554	125.527	82.1173	62.566	88.6943	30.6631	50.4926	-0.669052	0.44319
akap12b	ENSDARG00000110544	567365	2151.76	2977.73	2101.83	7336.56	14756.1	8422.36	2.07719	7.02591e-07
akap13	ENSDARG00000023868	108190639	194.848	276.657	144.684	479.142	237.128	290.085	0.707975	0.245836
akap17a	ENSDARG00000104768	393655	175.176	168.145	135.886	196.67	242.238	190.09	0.392119	0.523505
akap1a	ENSDARG00000089802	100002545	7.49417	10.7535	3.91038	9.64068	2.0442	0	-0.918961	1
akap1b	ENSDARG00000006062	556208	148.947	177.921	158.37	246.801	97.0997	146.527	0.0160016	0.987916
akap6	ENSDARG00000077295	100002625	211.71	132.952	238.533	31.8142	28.6189	39.602	-2.54323	7.96334e-07
akap7		101885028	209.837	640.319	829.977	696.057	169.669	502.946	-0.295518	0.782486
akap8l	ENSDARG00000099635	406500	1312.42	1521.12	1745.98	1548.29	1267.41	1233.6	-0.177465	0.767915
akap9	ENSDARG00000079610	565037	749.417	802.599	1016.7	586.153	453.813	480.174	-0.756705	0.0751442
akip1	ENSDARG00000115020	562301	48.7121	82.1173	90.9162	75.1973	42.9283	41.5821	-0.472178	0.606352
akirin1	ENSDARG00000116670	406432	689.464	986.385	1098.82	806.925	1432.99	1046.48	0.244172	0.71912
akirin2	ENSDARG00000058729	406855	537.707	701.907	452.626	521.561	615.306	725.707	0.138347	0.844842
akna	ENSDARG00000087110	556113	125.527	131.974	51.8125	82.9099	23.5084	68.3135	-0.823058	0.352774
aknad1		100003458	12.178	7.82069	6.84316	1.92814	5.11051	14.8508	-0.295821	0.907364
akr1a1a	ENSDARG00000109404	445326	6.5574	4.88793	6.84316	1.92814	14.3094	0	-0.17578	1
akr1a1b	ENSDARG00000112549	799805	210.774	434.048	575.803	265.119	403.73	374.239	-0.226697	0.786551
akr1b1	ENSDARG00000006215	415138	39.3444	71.3638	138.818	142.682	169.669	186.129	0.998982	0.145745
akr7a3	ENSDARG00000016649	436642	60.8901	158.369	176.945	103.155	142.072	168.309	0.062104	0.957391
akt1		101910198	47.7753	97.7587	101.67	120.509	47.0167	76.2339	-0.0189295	0.987921
akt1s1	ENSDARG00000074667	566559	760.658	854.411	910.14	1645.66	1755.97	1506.86	0.958903	0.00808976
akt2	ENSDARG00000011219	378972	688.527	851.478	577.758	1617.71	1297.05	1197.96	0.95759	0.0177167
akt2l	ENSDARG00000103612	403146	126.464	175.966	272.749	422.262	544.781	275.234	1.11109	0.0395467
akt3a	ENSDARG00000104810	560549	68.3843	29.3276	23.4623	56.88	16.3536	38.612	-0.115361	0.942794
akt3b	ENSDARG00000087205	100149794	76.8152	31.2828	26.395	24.1017	81.7682	37.6219	0.0912273	0.954699
aktip	ENSDARG00000115058	378716	470.259	414.497	437.962	625.68	1607.77	951.439	1.26759	0.00810031
alad	ENSDARG00000100372	550338	89.93	115.355	97.7594	79.0536	202.376	184.149	0.619164	0.391029
alas1	ENSDARG00000021059	64608	1061.36	1859.37	1459.55	1958.02	1952.22	1984.06	0.428347	0.406727
alas2	ENSDARG00000113125	64607	380.329	42.0362	105.58	25.0658	22.4862	13.8607	-3.10402	0.000180571
alcama	ENSDARG00000116648	30194	1695.56	1987.43	2298.32	4844.44	5742.17	5549.23	1.43175	3.4024e-05
alcamb	ENSDARG00000058538	323919	1040.75	661.826	813.358	290.184	510.029	435.622	-1.02586	0.0236787
aldh16a1	ENSDARG00000037935	492710	92.7403	133.929	176.945	82.9099	178.868	189.1	0.159681	0.872475
aldh18a1	ENSDARG00000099579	557186	682.906	608.059	591.444	685.452	1049.7	700.956	0.371858	0.500235
aldh1a2	ENSDARG00000113122	116713	639.815	972.699	1854.5	1557.93	5035.9	2401.86	1.37556	0.0240474
aldh1a3	ENSDARG00000076933	751785	59.9534	71.3638	51.8125	4.82034	19.4199	45.5423	-1.39278	0.160793
aldh1l1	ENSDARG00000114342	100526683	104.918	180.854	163.258	65.5566	210.553	199.99	0.0842253	0.942745
aldh1l2	ENSDARG00000070230	100333269	161.125	115.355	136.863	49.1675	185.001	99.9951	-0.307781	0.753126
aldh2.1	ENSDARG00000089924	393462	722.251	788.912	820.201	1398.86	2262.93	1435.57	1.12855	0.00477869
aldh2.2	ENSDARG00000028087	368239	266.043	218.979	229.735	220.772	845.279	485.125	1.11755	0.0629594
aldh3a1	ENSDARG00000074791	100000026	68.3843	36.1707	71.3644	54.9519	198.288	95.0448	0.984392	0.219337
aldh3a2a	ENSDARG00000028259	323653	59.0166	55.7224	94.8266	88.6943	156.382	99.9951	0.719287	0.305393
aldh3a2b	ENSDARG00000029381	447920	20.609	7.82069	12.7087	17.3532	2.0442	6.93035	-0.641342	0.748617
aldh3b1	ENSDARG00000013839	282559	53.396	113.4	173.034	53.0237	53.1493	88.1145	-0.806104	0.311128
aldh3b2	ENSDARG00000035606	557008	282.905	264.926	275.682	273.795	330.139	283.154	0.107141	0.88159
aldh4a1	ENSDARG00000038207	394133	54.3327	85.05	69.4092	112.796	189.089	145.537	1.09965	0.0506138
aldh5a1	ENSDARG00000113300	565235	101.171	43.9914	25.4174	32.7783	113.453	38.612	0.113992	0.942077
aldh6a1	ENSDARG00000053485	436647	1207.5	1977.66	1616.94	2681.07	2560.37	3218.65	0.817054	0.0510735
aldh7a1	ENSDARG00000018426	334197	644.499	976.609	1008.88	1020.95	1621.05	1428.64	0.63022	0.200074
aldh8a1	ENSDARG00000115119	447801	16.8619	15.6414	28.3502	30.8502	8.17682	32.6717	0.23839	0.887138
aldh9a1a.1	ENSDARG00000114905	100005587	1134.43	1836.89	2437.14	4961.09	4718.02	4453.25	1.38576	0.000859937
aldh9a1a.2	ENSDARG00000117162	100006238	9.36771	4.88793	5.86556	4.82034	4.08841	15.8408	0.297776	1
aldh9a1b	ENSDARG00000037061	399481	113.349	118.288	117.311	256.442	474.255	300.975	1.56368	0.000577723
aldoaa	ENSDARG00000011665	336425	1741.46	2352.07	3185.98	1733.39	2684.04	2733.53	-0.0257023	0.977066
aldoab	ENSDARG00000034470	406496	99.2977	97.7587	198.452	231.376	298.454	183.159	0.850314	0.156814
aldob	ENSDARG00000053684	321664	1083.84	2798.83	3956.32	12221.5	5180.01	6035.35	1.58008	0.00646023
aldoca	ENSDARG00000111344	792692	102.108	154.459	156.415	17.3532	15.3315	11.8806	-3.2113	2.17693e-08
aldocb	ENSDARG00000019702	369193	2375.65	2259.2	6033.71	948.643	805.417	772.239	-2.07823	1.77311e-05
alg1	ENSDARG00000054963	334161	210.774	102.647	155.437	179.317	223.84	150.488	0.239289	0.768471
alg10	ENSDARG00000053917	100331575	87.1197	31.2828	21.5071	8.67661	11.2431	35.6418	-1.33332	0.239959
alg11	ENSDARG00000110001	407614	136.769	104.602	130.998	103.155	85.8566	98.015	-0.375453	0.594235
alg12	ENSDARG00000111299	569494	216.394	358.774	293.278	237.161	393.509	314.836	0.122601	0.881098
alg13	ENSDARG00000054374	557181	14.9883	10.7535	10.7535	8.67661	0	2.97015	-1.64143	0.409593
alg14	ENSDARG00000116808	450072	31.8502	25.4173	40.0814	30.8502	38.8399	53.4627	0.339023	0.765278
alg2	ENSDARG00000070399	403068	166.745	214.091	164.236	148.466	296.41	197.02	0.235566	0.764209
alg3	ENSDARG00000053155	553725	119.907	126.109	67.454	86.7661	152.293	96.0349	0.0955458	0.928356
alg5	ENSDARG00000061235	751635	303.514	397.878	411.567	484.926	558.068	501.956	0.473236	0.34208
alg6	ENSDARG00000017617	445327	115.223	127.086	95.8042	81.9458	101.188	136.627	-0.0807024	0.934218
alg8	ENSDARG00000114612	327601	143.326	150.548	171.079	103.155	185.001	185.139	0.0253521	0.979622
alg9	ENSDARG00000012840	393598	450.587	327.492	506.394	341.28	297.432	169.299	-0.668692	0.236846
alk	ENSDARG00000095833	563509	99.2977	49.8569	38.1262	39.5268	12.2652	11.8806	-1.55466	0.0885643
alkbh1	ENSDARG00000071164	553720	86.1829	175.966	140.774	152.323	100.166	173.259	0.0801659	0.937946
alkbh2	ENSDARG00000115064	569291	34.6605	48.8793	55.7229	27.958	81.7682	47.5224	0.174508	0.889719
alkbh3	ENSDARG00000045606	792266	133.958	108.512	137.841	135.934	180.912	148.508	0.290806	0.685233
alkbh4	ENSDARG00000052247	553475	67.4475	97.7587	142.729	82.9099	91.9892	80.1941	-0.271271	0.75986
alkbh5	ENSDARG00000063003	570158	58.0798	48.8793	33.2382	87.7302	32.7073	57.4229	0.343822	0.752044
alkbh6	ENSDARG00000077253	317736	30.9134	31.2828	23.4623	18.3173	18.3978	37.6219	-0.204611	0.887387
alkbh7	ENSDARG00000037906	550272	61.8269	73.319	103.625	80.0177	84.8345	41.5821	-0.209751	0.838046
alkbh8	ENSDARG00000060256	556362	84.3094	147.616	131.975	289.22	111.409	158.408	0.620192	0.396702
allc	ENSDARG00000042562	436989	11.2413	7.82069	18.5743	32.7783	1.0221	21.7811	0.564516	0.779042
alms1	ENSDARG00000074779	561882	490.868	609.036	386.15	556.267	707.295	582.15	0.312624	0.597724
alox12	ENSDARG00000069463	322732	114.286	123.176	200.407	97.3709	187.045	71.2836	-0.300236	0.746283
alox5a	ENSDARG00000110148	567204	29.0399	42.0362	80.1627	40.4909	40.8841	24.7513	-0.510446	0.638711
alox5ap	ENSDARG00000113460	337376	8.43094	15.6414	25.4174	16.3892	16.3536	34.6518	0.446909	0.771853
alox5b.1	ENSDARG00000043085	573013	6.5574	3.91035	2.93278	13.497	0	1.9801	0.210642	1
alox5b.2	ENSDARG00000043089	724056	15.9251	1.95517	1.95519	1.92814	0	2.97015	-2.01532	1
alox5b.3	ENSDARG00000069966	553602	19.6722	10.7535	2.93278	33.7424	9.19892	7.9204	0.608296	0.752667
alp3	ENSDARG00000098063	100330410	12.178	5.86552	5.86556	9.64068	8.17682	7.9204	0.104981	0.967224
alpi.1	ENSDARG00000015273	541539	219.204	364.64	424.276	383.699	932.157	536.607	0.877776	0.130016
alpi.2	ENSDARG00000053774	574009	14.9883	24.4397	5.86556	13.497	18.3978	12.8707	-0.0175175	0.99276
alpk1		100333928	117.096	127.086	126.11	148.466	287.211	192.07	0.761191	0.178818
alpk2	ENSDARG00000079637	559835	60.8901	25.4173	13.6863	33.7424	18.3978	31.6816	-0.255109	0.867062
alpk3a	ENSDARG00000078989	100321139	66.5107	67.4535	43.0141	32.7783	26.5747	28.7115	-1.00669	0.186477
alpk3b	ENSDARG00000105630	100534893	68.3843	43.0138	39.1038	19.2814	14.3094	33.6617	-1.16207	0.18536
alpl	ENSDARG00000015546	393982	248.244	348.998	279.592	772.219	1189.73	847.483	1.67994	2.32144e-05
als2a	ENSDARG00000112274	557014	116.16	140.772	262.973	238.125	326.051	293.055	0.721617	0.231291
als2b	ENSDARG00000076924	100318899	482.437	413.519	424.276	635.321	682.764	459.383	0.428945	0.413095
alx1	ENSDARG00000110530	565176	19.6722	25.4173	23.4623	85.8021	166.603	61.3831	2.19449	0.000876996
alx3		566955	77.752	139.795	144.684	1076.86	774.754	659.374	2.79388	2.60858e-10
alx4a	ENSDARG00000088332	100006399	222.015	508.345	321.628	1277.39	1102.85	1130.64	1.73894	6.60015e-05
alx4b	ENSDARG00000074442	497424	22.4825	10.7535	27.3726	116.652	117.542	31.6816	2.13275	0.00712937
alyref	ENSDARG00000077732	560127	2865.58	3556.46	2847.73	3081.16	4132.36	3264.2	0.176707	0.767215
amacr	ENSDARG00000117070	553653	17.7987	37.1483	6.84316	5.78441	7.15472	13.8607	-1.20516	0.415515
ambp	ENSDARG00000112731	394093	34.6605	42.0362	178.9	98.3349	62.3482	77.2239	-0.102671	0.944694
ambra1a	ENSDARG00000008322	100332642	283.842	342.155	309.897	301.753	372.045	337.607	0.111906	0.875242
ambra1b	ENSDARG00000039878	559106	143.326	74.2966	111.446	136.898	107.321	106.925	0.0934791	0.925685
amd1	ENSDARG00000111778	792097	1523.19	1799.74	1938.57	1278.35	1678.29	1427.65	-0.263144	0.632758
amdhd2	ENSDARG00000100376	402981	126.464	136.862	196.496	224.628	333.205	232.662	0.781674	0.142171
amer1	ENSDARG00000079624	100885784	429.978	348.998	497.595	375.022	421.106	411.861	-0.0797233	0.914332
amer2	ENSDARG00000075222	100101649	741.923	522.031	393.97	128.221	173.757	151.478	-1.87074	1.65861e-05
amfr	ENSDARG00000020218	406442	509.603	758.607	657.921	1278.35	910.693	942.528	0.701322	0.121632
amfrb	ENSDARG00000105578	101884807	23.4193	32.2604	15.6415	32.7783	30.6631	60.3931	0.796174	0.437004
amh	ENSDARG00000014357	493624	17.7987	3.91035	7.82075	2.8922	2.0442	15.8408	-0.508301	0.838046
amigo1	ENSDARG00000079620	100144409	77.752	36.1707	47.9021	25.0658	14.3094	27.7214	-1.26962	0.129421
amigo3	ENSDARG00000074469	100000131	170.492	109.49	158.37	40.4909	42.9283	19.801	-2.08677	0.000254176
ammecr1	ENSDARG00000012892	393553	683.843	723.414	591.444	773.183	951.577	670.264	0.260908	0.654603
amn	ENSDARG00000062947	793454	23.4193	17.5966	16.6191	10.6047	7.15472	6.93035	-1.22223	0.346896
amn1	ENSDARG00000111705	751744	119.907	129.041	206.272	132.077	173.757	91.0846	-0.197788	0.823342
amot	ENSDARG00000078335	563421	93.6771	147.616	77.2299	140.754	170.691	178.209	0.62042	0.3307
amotl1	ENSDARG00000019442	101884950	50.5856	52.7897	23.4623	46.2753	29.641	38.612	-0.147002	0.910778
amotl2a	ENSDARG00000061923	558920	52.4592	68.4311	14.6639	58.8082	140.028	82.1742	1.05097	0.234147
amotl2b	ENSDARG00000061948	559784	509.603	893.514	327.494	1902.11	3094.93	1773.18	1.96792	5.96517e-05
ampd1	ENSDARG00000033832	393867	28.1031	36.1707	26.395	32.7783	51.1051	35.6418	0.398118	0.718269
ampd2a	ENSDARG00000104491	100330772	554.568	949.237	1024.52	2194.22	1645.58	1548.44	1.09175	0.0124879
ampd2b	ENSDARG00000029952	571355	217.331	149.571	275.682	223.664	153.315	146.527	-0.295418	0.69738
ampd3a	ENSDARG00000005800	556578	113.349	68.4311	23.4623	38.5627	29.641	29.7015	-1.06818	0.242663
ampd3b	ENSDARG00000117191	333997	55.2695	115.355	173.034	82.9099	55.1935	60.3931	-0.790916	0.305811
amph	ENSDARG00000007663	393804	865.577	429.161	1057.76	27.958	45.9946	111.876	-3.66241	1.67408e-09
amt	ENSDARG00000010862	450000	89.93	101.669	136.863	57.8441	174.779	102.965	0.0303813	0.979791
amy2a	ENSDARG00000013856	406539	10.3045	1.95517	35.1934	7.71254	5.11051	2.97015	-1.58549	0.383802
anapc1	ENSDARG00000075687	568795	172.366	258.083	182.81	170.64	201.354	160.388	-0.204025	0.782592
anapc10	ENSDARG00000090152	798352	86.1829	131.974	205.295	122.437	125.719	126.726	-0.175378	0.848756
anapc11	ENSDARG00000116987	768140	107.729	171.078	356.822	277.652	225.885	167.319	0.0781888	0.944694
anapc13	ENSDARG00000078435	569473	76.8152	122.198	187.698	245.837	81.7682	86.1344	0.0983528	0.937493
anapc15	ENSDARG00000101285	751740	74.9417	126.109	151.527	158.107	132.873	181.179	0.421937	0.564263
anapc16	ENSDARG00000013822	550576	217.331	390.057	594.377	578.441	343.426	315.826	0.0428056	0.967649
anapc2	ENSDARG00000105035	100318335	108.665	146.638	153.482	107.976	162.514	109.896	-0.104048	0.909429
anapc4	ENSDARG00000032237	494046	75.8785	95.8035	105.58	88.6943	124.696	132.667	0.319775	0.685142
anapc5	ENSDARG00000008461	322854	124.591	149.571	157.393	199.562	171.713	139.597	0.24372	0.738423
anapc7	ENSDARG00000063005	558402	36.5341	31.2828	4.88797	23.1376	39.862	36.6319	0.453031	0.760099
and1	ENSDARG00000088514	794315	244.497	219.957	516.17	2129.63	2407.05	2836.49	2.91065	1.31763e-10
and2	ENSDARG00000079302	566702	320.376	300.119	1198.53	11926.5	12892.8	12557.8	4.36101	1.32266e-13
and3	ENSDARG00000056873	561047	120.843	87.9828	234.623	123.401	116.52	258.403	0.168504	0.875306
and4		100192207	0.936771	3.91035	0.977594	30.8502	26.5747	54.4528	4.26966	0.000124439
angel1	ENSDARG00000077567	569547	37.4708	53.7673	44.9693	43.3831	28.6189	57.4229	-0.0727665	0.956937
angel2	ENSDARG00000016743	562704	165.808	156.414	186.72	177.389	240.194	175.239	0.219876	0.758996
angpt1	ENSDARG00000030364	114407	19.6722	31.2828	3.91038	30.8502	38.8399	61.3831	1.25609	0.256522
angpt2a	ENSDARG00000014946	101101687	11.2413	7.82069	12.7087	12.5329	0	6.93035	-0.703206	0.768972
angpt2b	ENSDARG00000053906	114408	14.0516	22.4845	11.7311	124.365	238.15	133.657	3.36208	1.74314e-08
angpt4	ENSDARG00000076787	571050	22.4825	21.5069	10.7535	61.7004	65.4145	31.6816	1.53548	0.0643208
angptl1a	ENSDARG00000012071	544656	286.652	682.355	339.225	2399.57	2252.71	2488.99	2.44871	2.92721e-08
angptl1b	ENSDARG00000100159	334311	29.0399	17.5966	12.7087	142.682	60.304	150.488	2.57292	0.000125261
angptl2a	ENSDARG00000024030	569092	29.9767	35.1931	20.5295	41.4549	33.7294	61.3831	0.672388	0.490749
angptl2b	ENSDARG00000068369	503514	463.702	748.831	392.993	617.004	1430.94	780.16	0.816723	0.156814
angptl3	ENSDARG00000044365	114421	37.4708	22.4845	54.7453	348.029	392.487	636.602	3.58576	4.13144e-12
angptl4	ENSDARG00000035859	492647	4244.51	6407.1	1198.53	18070.5	25938.9	13555.8	2.28029	0.000111723
angptl5	ENSDARG00000056630	566212	198.595	306.962	214.093	509.028	1674.2	871.244	2.08554	6.47769e-05
angptl6	ENSDARG00000020265	561927	34.6605	10.7535	36.171	181.245	60.304	190.09	2.40306	0.000833828
angptl7	ENSDARG00000110344	450053	1859.49	1938.55	1238.61	1838.48	7305.99	3455.28	1.32282	0.0210643
ank1a	ENSDARG00000092143	449796	309.134	345.088	314.785	76.1614	26.5747	30.6916	-2.85829	9.57611e-08
ank1b	ENSDARG00000116496	797662	189.228	113.4	412.545	68.4488	30.6631	55.4428	-2.20911	0.000539605
ank2a	ENSDARG00000110704	568926	737.239	414.497	836.82	93.5146	99.1439	120.786	-2.66552	1.65556e-09
ank2b	ENSDARG00000043313	450043	3397.67	1205.36	1708.83	348.029	365.913	366.319	-2.54675	5.78797e-08
ank3a	ENSDARG00000111919	103909035	1641.22	911.111	2450.83	330.675	358.758	450.473	-2.13394	3.94475e-06
ank3b		100126016	1886.66	1970.81	2643.41	1069.15	1020.06	1013.81	-1.06694	0.00380618
ankar	ENSDARG00000000516	368636	31.8502	12.7086	12.7087	28.922	1.0221	22.7712	-0.118614	0.960073
ankdd1a	ENSDARG00000098647	569271	37.4708	45.9466	21.5071	35.6705	42.9283	43.5622	0.219014	0.858031
ankdd1b	ENSDARG00000025866	562681	18.7354	21.5069	12.7087	7.71254	8.17682	20.7911	-0.529716	0.747277
ankef1a	ENSDARG00000019135	566413	36.5341	21.5069	16.6191	17.3532	7.15472	20.7911	-0.720247	0.596501
ankef1b	ENSDARG00000060211	100149106	27.1664	17.5966	16.6191	85.8021	53.1493	58.413	1.68416	0.0175203
ankfy1	ENSDARG00000111387	568480	169.556	126.109	165.213	118.58	171.713	161.378	-0.0295356	0.97601
ankha	ENSDARG00000071724	571148	78.6888	42.0362	46.9245	37.5987	18.3978	17.8209	-1.18241	0.163312
ankhb	ENSDARG00000014969	323738	303.514	207.248	406.679	163.892	155.36	135.637	-1.01206	0.0424357
ankhd1	ENSDARG00000077860	563327	967.685	1538.72	1265.01	1768.1	1871.47	1698.93	0.501373	0.287982
ankib1a	ENSDARG00000060768	566524	212.647	227.778	264.928	176.424	220.774	173.259	-0.306334	0.631557
ankib1b	ENSDARG00000076829	561277	626.7	601.216	735.151	835.847	1513.73	792.04	0.678317	0.184195
ankk1	ENSDARG00000056921	100170831	24.356	3.91035	2.93278	0	4.08841	21.7811	-0.272568	0.931664
ankle2	ENSDARG00000035607	559297	237.003	205.293	275.682	167.748	227.929	179.199	-0.320932	0.619835
ankmy1	ENSDARG00000062702	568987	51.5224	36.1707	35.1934	34.7065	50.083	59.403	0.229661	0.838124
ankmy2a	ENSDARG00000005948	334389	127.401	127.086	128.065	99.299	177.846	148.508	0.153552	0.85776
ankra2	ENSDARG00000111289	406403	279.158	295.231	572.87	277.652	353.647	298.005	-0.303943	0.676078
ankrd10a	ENSDARG00000037100	393955	320.376	218.979	236.578	80.0177	195.222	146.527	-0.880252	0.133956
ankrd10b	ENSDARG00000004771	559527	268.853	275.679	336.292	289.22	427.239	362.358	0.292413	0.64009
ankrd11	ENSDARG00000051886	327352	6620.16	9083.73	6943.85	10046.6	9050.72	8492.65	0.284782	0.587687
ankrd12	ENSDARG00000052419	393119	2467.46	3779.35	2687.41	3471.61	2660.53	3075.1	0.0434611	0.955863
ankrd13a	ENSDARG00000061901	556837	104.918	154.459	220.936	171.604	185.001	219.791	0.263408	0.738082
ankrd13b	ENSDARG00000014652	568981	41.2179	22.4845	23.4623	0	18.3978	6.93035	-1.78843	0.215227
ankrd13c	ENSDARG00000103831	325167	836.537	852.456	939.468	757.758	1025.17	735.608	-0.0616976	0.93285
ankrd13d	ENSDARG00000098140	562931	139.579	66.4759	176.945	66.5207	77.6798	86.1344	-0.733847	0.307254
ankrd16	ENSDARG00000113646	550225	47.7753	43.9914	66.4764	42.419	88.9229	73.2637	0.370141	0.703971
ankrd1a	ENSDARG00000110628	100151027	50.5856	82.1173	60.6108	24.1017	69.503	49.5025	-0.434805	0.671547
ankrd1b	ENSDARG00000076192	564159	4.68386	3.91035	7.82075	0	4.08841	4.95025	-0.863901	1
ankrd2	ENSDARG00000002722	101886079	10.3045	3.91035	2.93278	0	0	2.97015	-2.52976	1
ankrd22	ENSDARG00000002298	393244	50.5856	129.041	69.4092	99.299	54.1714	34.6518	-0.403602	0.705547
ankrd24	ENSDARG00000062103	565326	91.8036	88.9604	68.4316	66.5207	99.1439	45.5423	-0.239375	0.805113
ankrd27	ENSDARG00000089207	386887	19.6722	25.4173	17.5967	5.78441	26.5747	22.7712	-0.187059	0.917065
ankrd28b	ENSDARG00000009023	560747	428.104	616.857	566.027	597.722	686.853	601.951	0.227842	0.710227
ankrd29	ENSDARG00000112325	553798	45.9018	21.5069	55.7229	8.67661	7.15472	5.9403	-2.49902	0.00640909
ankrd31	ENSDARG00000052731	550610	2.81031	8.79828	0	6.74848	0	3.9602	-0.112816	1
ankrd33aa	ENSDARG00000055638	557568	143.326	189.652	54.7453	40.4909	36.7957	85.1443	-1.25513	0.0972826
ankrd33ab	ENSDARG00000002508	569518	69.3211	67.4535	33.2382	12.5329	9.19892	6.93035	-2.56738	0.0012557
ankrd33ba	ENSDARG00000109989	568270	63.7004	15.6414	8.79835	23.1376	16.3536	17.8209	-0.62211	0.685278
ankrd33bb	ENSDARG00000015589	557905	155.504	104.602	85.0507	43.3831	60.304	80.1941	-0.90921	0.171776
ankrd34a		798097	119.907	97.7587	227.779	9.64068	38.8399	29.7015	-2.51262	0.000255231
ankrd34ba	ENSDARG00000077086	560938	42.1547	26.3948	21.5071	20.2454	19.4199	35.6418	-0.258778	0.85297
ankrd34bb	ENSDARG00000061641	565548	90.8668	102.647	82.1179	26.0298	111.409	84.1543	-0.315832	0.767915
ankrd34c	ENSDARG00000093286	566743	77.752	35.1931	71.3644	27.958	21.4641	19.801	-1.41254	0.0652337
ankrd37	ENSDARG00000056376	793783	26.2296	28.35	16.6191	12.5329	11.2431	6.93035	-1.21325	0.305541
ankrd39	ENSDARG00000041350	100000333	17.7987	14.6638	25.4174	32.7783	35.7736	16.8309	0.560894	0.659314
ankrd40	ENSDARG00000076490	100005118	266.043	194.54	293.278	259.334	414.974	278.204	0.337167	0.612309
ankrd44	ENSDARG00000026028	561373	417.8	205.293	317.718	444.435	655.168	540.568	0.801565	0.119443
ankrd45	ENSDARG00000011326	553808	19.6722	14.6638	38.1262	2.8922	0	0	-4.62211	0.00223501
ankrd46a	ENSDARG00000044328	100329397	16.8619	15.6414	14.6639	17.3532	8.17682	15.8408	-0.187907	0.919258
ankrd46b	ENSDARG00000015780	402888	158.314	120.243	209.205	112.796	181.934	189.1	-0.0119461	0.990115
ankrd49	ENSDARG00000023508	550246	35.5973	53.7673	52.7901	46.2753	30.6631	52.4727	-0.134398	0.911993
ankrd52a	ENSDARG00000112185	553206	58.0798	68.4311	18.5743	60.7363	21.4641	22.7712	-0.465838	0.71905
ankrd52b		564614	36.5341	35.1931	11.7311	48.2034	71.5472	58.413	1.09285	0.204032
ankrd54	ENSDARG00000055743	436851	289.462	296.209	363.665	163.892	456.88	293.055	-0.0553119	0.956986
ankrd55	ENSDARG00000099182	100006755	67.4475	29.3276	126.11	62.6644	12.2652	46.5324	-0.874409	0.423262
ankrd63		101885975	11.2413	12.7086	1.95519	4.82034	0	17.8209	-0.193712	0.953238
ankrd66	ENSDARG00000111486	101886816	1.87354	1.95517	7.82075	0	0	2.97015	-1.97001	1
ankrd6a	ENSDARG00000057790	100330565	61.8269	18.5741	3.91038	16.3892	5.11051	8.91045	-1.47032	0.323401
ankrd6b	ENSDARG00000029370	378477	26.2296	26.3948	2.93278	38.5627	12.2652	18.811	0.326355	0.861505
ankrd9	ENSDARG00000028804	492328	22.4825	40.0811	57.678	35.6705	9.19892	22.7712	-0.827295	0.473699
anks1ab	ENSDARG00000078901	100003659	203.279	101.669	213.115	32.7783	14.3094	53.4627	-2.36415	0.000251359
anks1b	ENSDARG00000003512	565408	634.194	463.376	976.616	1211.83	871.853	799.961	0.475422	0.430819
anks3	ENSDARG00000038557	100136846	112.413	142.728	66.4764	117.616	162.514	151.478	0.424092	0.57701
anks4b	ENSDARG00000036846	431735	79.6255	50.8345	79.1851	23.1376	22.4862	33.6617	-1.4029	0.0431245
anks6		449657	2.81031	0	0	3.85627	0	0	0.455373	1
ankzf1	ENSDARG00000041904	553307	196.722	259.06	323.584	306.574	367.957	328.697	0.364394	0.549119
anln	ENSDARG00000060917	562517	305.387	316.738	169.124	121.473	464.034	404.931	0.323612	0.731177
ano1	ENSDARG00000102335	407698	177.05	87.0052	212.138	660.387	626.549	367.309	1.79645	0.000354135
ano10a	ENSDARG00000057736	566425	283.842	536.695	518.125	619.896	1129.42	1028.66	1.05332	0.0324878
ano10b	ENSDARG00000018159	565195	209.837	226.8	252.219	395.268	914.782	450.473	1.3536	0.00566761
ano11	ENSDARG00000077327	100007289	75.8785	60.6104	129.042	40.4909	22.4862	29.7015	-1.51718	0.0258424
ano2	ENSDARG00000101363	566373	84.3094	29.3276	23.4623	24.1017	19.4199	17.8209	-1.16098	0.248803
ano3	ENSDARG00000058015	553392	139.579	87.0052	87.9835	122.437	67.4587	25.7413	-0.544447	0.581073
ano5a	ENSDARG00000015731	100534737	46.8386	46.9242	44.9693	72.3051	40.8841	26.7314	0.0131197	0.991832
ano5b	ENSDARG00000036147	560102	429.041	328.469	264.928	1023.84	1138.62	1237.56	1.73333	5.55367e-06
ano6	ENSDARG00000061544	100535437	29.9767	43.9914	43.9917	50.1315	16.3536	17.8209	-0.48234	0.698426
ano8a	ENSDARG00000076265	562947	86.1829	42.0362	43.0141	9.64068	16.3536	25.7413	-1.72826	0.0375124
ano8b	ENSDARG00000112701	562782	84.3094	84.0725	92.8714	21.2095	25.5526	8.91045	-2.23127	0.000812321
ano9a	ENSDARG00000078941	100126106	36.5341	53.7673	35.1934	22.1736	9.19892	16.8309	-1.37803	0.126746
ano9b	ENSDARG00000079324	559809	52.4592	49.8569	137.841	27.958	36.7957	39.602	-1.20249	0.126118
anos1a	ENSDARG00000012896	30630	392.507	438.936	557.229	371.166	424.172	344.538	-0.284815	0.63551
anos1b	ENSDARG00000004932	30652	266.043	279.59	204.317	358.633	876.964	636.602	1.31966	0.00677788
anp32a	ENSDARG00000006487	335907	1191.57	1057.75	1251.32	775.111	1161.11	939.558	-0.283755	0.61602
anp32b	ENSDARG00000023330	322000	1572.84	2167.31	2219.14	1503.95	2562.41	2180.09	0.0678806	0.931014
anp32e	ENSDARG00000054804	406562	3488.54	2105.72	1832.99	1425.86	2086.11	1995.94	-0.431387	0.459719
anpepa	ENSDARG00000111591	558452	14.9883	32.2604	55.7229	9.64068	16.3536	17.8209	-1.23289	0.262688
anpepb	ENSDARG00000103878	322533	20.609	18.5741	18.5743	14.461	15.3315	11.8806	-0.471256	0.748145
antxr1a	ENSDARG00000025672	793153	38.4076	31.2828	27.3726	119.544	99.1439	53.4627	1.487	0.0243145
antxr1b	ENSDARG00000074075	556289	19.6722	11.731	12.7087	33.7424	58.2598	29.7015	1.46204	0.10698
antxr1c	ENSDARG00000063612	563907	31.8502	80.1621	7.82075	122.437	71.5472	122.766	1.40285	0.126259
antxr1d	ENSDARG00000060845	563132	15.9251	31.2828	21.5071	11.5688	26.5747	1.9801	-0.777832	0.635845
antxr2a	ENSDARG00000111517	557239	791.572	1428.25	1398.94	4288.17	6906.35	3902.78	2.06076	1.55427e-06
antxr2b	ENSDARG00000112595	560841	5.62063	17.5966	4.88797	5.78441	5.11051	12.8707	-0.240636	0.923982
anxa11a	ENSDARG00000077383	368215	570.494	1213.19	1326.6	2017.79	3014.18	2344.44	1.24594	0.00808751
anxa11b	ENSDARG00000002632	353365	1274.95	1175.06	1310.95	2360.04	4897.91	3576.06	1.52636	0.000178164
anxa13	ENSDARG00000013976	81880	552.695	460.443	635.436	1801.84	2622.71	1680.12	1.88866	7.58956e-07
anxa13l	ENSDARG00000013613	554118	326.933	299.142	278.614	114.724	89.945	81.1841	-1.66184	9.26495e-05
anxa1a	ENSDARG00000026726	334724	590.166	1069.48	1320.73	2095.88	2252.71	2240.48	1.14467	0.00984919
anxa1b	ENSDARG00000100095	353358	179.86	264.926	810.425	238.125	245.305	363.349	-0.567727	0.508103
anxa1c	ENSDARG00000104359	494158	74.9417	98.7362	262.973	67.4848	81.7682	151.478	-0.537752	0.571266
anxa2a	ENSDARG00000003216	325557	874.007	1944.42	2106.72	1625.42	1916.44	1425.67	0.0124035	0.988985
anxa2b	ENSDARG00000116775	799806	19.6722	18.5741	208.228	17.3532	4.08841	0	-3.52128	0.190641
anxa3a	ENSDARG00000112919	447893	29.9767	60.6104	233.645	43.3831	22.4862	72.2737	-1.23003	0.226731
anxa3b	ENSDARG00000109335	492336	402.812	420.362	371.486	713.41	1404.37	1045.49	1.40471	0.000773345
anxa4	ENSDARG00000036456	353362	614.522	1188.75	1298.24	2006.23	2907.88	2200.88	1.19795	0.00819567
anxa5a	ENSDARG00000026406	557578	52.4592	135.885	99.7146	75.1973	42.9283	22.7712	-1.03052	0.212279
anxa5b	ENSDARG00000016470	337132	939.581	887.649	1313.89	1156.88	2293.6	1629.62	0.693541	0.171615
anxa6	ENSDARG00000013335	353363	44.0282	100.691	75.2747	107.012	145.139	58.413	0.497687	0.580167
aoc1	ENSDARG00000061355	555401	43.0915	22.4845	44.9693	25.0658	11.2431	33.6617	-0.658945	0.574651
aoc2	ENSDARG00000111584	541429	898.363	1915.09	2144.84	8449.09	9256.16	11144	2.54067	4.84926e-09
aox5	ENSDARG00000071475	64265	24.356	15.6414	62.566	15.4251	2.0442	32.6717	-1.03084	0.485678
aox6	ENSDARG00000020054	570457	197.659	222.89	160.325	411.657	566.245	347.508	1.18999	0.00715182
ap1ar	ENSDARG00000031496	100332265	53.396	31.2828	67.454	60.7363	60.304	45.5423	0.13079	0.912062
ap1b1	ENSDARG00000020621	562166	1015.46	961.945	1189.73	668.099	1088.54	939.558	-0.232338	0.710107
ap1g1	ENSDARG00000102394	324466	1371.43	1875.01	2215.23	2097.81	2067.71	1675.17	0.096833	0.891269
ap1g2	ENSDARG00000054337	100007877	243.56	243.419	361.71	184.137	376.134	293.055	0.00765005	0.993214
ap1m1	ENSDARG00000096249	100330411	739.112	842.68	1044.07	901.404	1353.26	1236.57	0.410934	0.438721
ap1m2	ENSDARG00000096454	403021	145.2	163.257	227.779	48.2034	39.862	56.4329	-1.89124	0.000160211
ap1m3	ENSDARG00000113914	445244	14.0516	12.7086	12.7087	10.6047	5.11051	18.811	-0.192083	0.92723
ap1s1	ENSDARG00000056803	393279	274.474	178.898	424.276	151.359	156.382	148.508	-0.943815	0.0838538
ap1s2	ENSDARG00000114515	327237	537.707	678.445	742.971	429.974	1296.03	950.448	0.450032	0.519992
ap1s3a	ENSDARG00000110439	550415	5.62063	7.82069	12.7087	12.5329	1.0221	1.9801	-0.745653	1
ap1s3b	ENSDARG00000027966	447897	84.3094	149.571	256.13	47.2393	7.15472	25.7413	-2.60938	0.00057496
ap2a1	ENSDARG00000054320	558153	929.277	1176.04	1424.35	1273.53	1705.89	1367.26	0.30039	0.599312
ap2b1	ENSDARG00000035152	334632	1155.04	1003.98	1270.87	974.673	1933.82	1728.63	0.435001	0.446685
ap2m1a	ENSDARG00000002790	321051	2205.16	2414.64	3095.06	3163.11	4636.26	3291.92	0.523708	0.271927
ap2m1b	ENSDARG00000033899	394001	1518.51	1757.7	3213.35	1749.78	2558.32	1721.7	-0.10601	0.898442
ap2s1	ENSDARG00000026967	100148085	860.893	1070.46	1710.79	1228.22	1661.94	1294.99	0.20051	0.776316
ap3b1	ENSDARG00000100082	563316	231.382	415.474	293.278	607.363	618.372	379.189	0.771714	0.138885
ap3b2	ENSDARG00000105296	100000165	141.452	95.8035	193.564	31.8142	4.08841	2.97015	-3.46459	6.50733e-05
ap3d1	ENSDARG00000114974	563359	227.635	259.06	259.062	271.867	240.194	211.871	-0.0426896	0.959145
ap3m1	ENSDARG00000029928	266798	118.97	147.616	174.989	232.34	460.968	334.637	1.21901	0.0128018
ap3m2	ENSDARG00000016128	415244	356.91	324.559	556.251	76.1614	153.315	107.916	-1.87583	9.64344e-05
ap3s1		449791	91.8036	129.041	134.908	208.239	127.763	130.687	0.39226	0.589987
ap3s2	ENSDARG00000039882	436812	245.434	222.89	334.337	239.089	242.238	185.139	-0.268213	0.694811
ap4b1	ENSDARG00000013726	393309	88.0565	78.2069	52.7901	94.4787	99.1439	87.1244	0.35753	0.660247
ap4e1	ENSDARG00000103684	570467	103.982	122.198	108.513	79.0536	241.216	115.836	0.381236	0.666504
ap4m1	ENSDARG00000056871	436945	75.8785	64.5207	85.0507	78.0895	82.7903	72.2737	0.0483654	0.96428
ap4s1	ENSDARG00000054220	368852	67.4475	109.49	189.653	197.634	194.199	164.348	0.60189	0.396855
ap5b1	ENSDARG00000078805	100148772	113.349	94.8259	104.603	78.0895	89.945	62.3732	-0.441324	0.54259
ap5m1	ENSDARG00000031533	553681	52.4592	59.6328	101.67	51.0956	125.719	89.1045	0.314655	0.753111
ap5s1	ENSDARG00000076755	556111	65.574	90.9156	90.9162	69.4129	97.0997	121.776	0.220711	0.806823
ap5z1	ENSDARG00000078111	100537934	66.5107	78.2069	71.3644	42.419	96.0776	57.4229	-0.14222	0.896539
apaf1	ENSDARG00000021239	58131	73.0681	74.2966	55.7229	89.6583	117.542	108.906	0.637864	0.331863
apba1a	ENSDARG00000103848	100003938	87.1197	50.8345	63.5436	37.5987	9.19892	26.7314	-1.45237	0.0785432
apba1b	ENSDARG00000074328	565507	651.993	364.64	339.225	62.6644	97.0997	85.1443	-2.46965	1.58528e-07
apba2a	ENSDARG00000063314	100330365	109.602	95.8035	141.751	74.2332	68.4809	76.2339	-0.664802	0.292705
apba2b	ENSDARG00000060639	327160	529.276	205.293	646.19	55.916	75.6356	51.4826	-2.91581	7.51334e-08
apbb1	ENSDARG00000076560	565164	95.5507	84.0725	93.849	29.8861	69.503	86.1344	-0.560588	0.509588
apbb1ip	ENSDARG00000016505	393607	35.5973	43.0138	36.171	11.5688	9.19892	6.93035	-2.04999	0.018827
apbb2b	ENSDARG00000113966	564990	66.5107	82.1173	72.342	195.706	91.9892	109.896	0.848167	0.189778
apbb3	ENSDARG00000053771	101883158	61.8269	56.7	60.6108	19.2814	9.19892	15.8408	-2.01268	0.00548281
apc	ENSDARG00000058868	386762	2296.03	1535.79	2549.57	1005.52	1084.45	978.17	-1.05653	0.00756639
apc2	ENSDARG00000063007	565771	215.457	74.2966	119.266	34.7065	16.3536	9.9005	-2.74443	0.000117908
apcdd1l	ENSDARG00000116773	100001408	80.5623	35.1931	29.3278	67.4848	110.387	65.3433	0.743672	0.392724
apeh	ENSDARG00000008703	100333019	165.808	248.307	155.437	131.113	275.968	254.443	0.215744	0.798992
apela	ENSDARG00000113515	100536023	16.8619	19.5517	32.2606	56.88	28.6189	81.1841	1.28058	0.140133
apex1	ENSDARG00000045843	406730	488.058	532.785	818.246	187.993	321.962	397.01	-1.01998	0.0459418
apex2	ENSDARG00000008472	393115	157.378	164.235	165.213	156.179	187.045	137.617	-0.0179951	0.984234
aph1b	ENSDARG00000111794	386808	436.535	466.309	612.951	473.357	477.322	455.423	-0.108306	0.876988
api5	ENSDARG00000033597	321676	735.365	816.285	790.874	541.806	936.246	892.035	0.0167894	0.984029
apip	ENSDARG00000003132	447941	163.935	278.612	374.418	354.777	272.901	281.174	0.154137	0.854756
apitd1	ENSDARG00000111281	569270	83.3726	98.7362	174.012	84.838	155.36	107.916	-0.0329715	0.977578
apln	ENSDARG00000053279	798375	1520.38	1805.6	1952.26	4228.4	4729.27	3988.91	1.29446	0.000168565
aplnr2	ENSDARG00000004447	793710	51.5224	31.2828	55.7229	21.2095	15.3315	38.612	-0.881893	0.363475
aplnra	ENSDARG00000002172	561935	281.968	451.645	316.74	803.069	1012.9	732.637	1.27891	0.0018798
aplnrb	ENSDARG00000036670	565492	92.7403	98.7362	109.491	25.0658	48.0388	41.5821	-1.39308	0.021285
aplp1	ENSDARG00000098368	404233	1678.69	744.921	1774.33	202.454	335.25	391.07	-2.17645	7.61886e-06
aplp2	ENSDARG00000054864	796801	2134.9	2031.43	2184.92	2608.77	1839.78	1795.95	-0.0244188	0.974757
apmap	ENSDARG00000017422	266637	271.664	258.083	233.645	158.107	304.586	300.975	0.000184032	0.999533
apnl	ENSDARG00000090900	100002992	11.2413	14.6638	31.283	1.92814	11.2431	14.8508	-1.03056	0.524296
apoa1a	ENSDARG00000110395	30355	13.1148	120.243	993.235	36.6346	11.2431	7.9204	-4.33496	0.0507717
apoa1b	ENSDARG00000101324	100101640	491.805	1154.53	3605.37	705.698	55.1935	1217.76	-1.40823	0.509246
apoa1bp	ENSDARG00000058806	436891	153.63	150.548	151.527	71.341	206.465	181.179	0.00979736	0.992275
apoa2	ENSDARG00000015866	322327	237.003	516.166	1894.58	324.891	12.2652	578.189	-1.53231	0.524658
apoa4a	ENSDARG00000101160	550608	14.0516	40.0811	16.6191	4.82034	11.2431	7.9204	-1.56247	0.212295
apoa4b.1	ENSDARG00000040298	322543	22.4825	91.8931	580.691	23.1376	0	46.5324	-3.31823	0.277507
apoa4b.2	ENSDARG00000020866	570354	16.8619	62.5655	381.262	5.78441	2.0442	14.8508	-4.34234	0.000109419
apoa4b.3	ENSDARG00000094929	100004607	5.62063	8.79828	97.7594	6.74848	2.0442	1.9801	-3.37477	0.0198748
apoba	ENSDARG00000042780	566465	119.907	78.2069	121.222	29.8861	30.6631	56.4329	-1.44887	0.0206647
apobb.1	ENSDARG00000022767	321166	133.021	147.616	569.937	51.0956	36.7957	111.876	-2.08973	0.00460185
apobb.2	ENSDARG00000075016	100330435	45.9018	37.1483	26.395	25.0658	32.7073	20.7911	-0.479423	0.671547
apobec2a	ENSDARG00000018881	503736	19.6722	15.6414	11.7311	2.8922	4.08841	19.801	-0.813283	0.657708
apobec2b	ENSDARG00000113181	567047	8.43094	21.5069	14.6639	3.85627	35.7736	27.7214	0.59403	0.728913
apoc1	ENSDARG00000092170	570638	171.429	449.69	1442.93	169.676	16.3536	207.911	-2.38926	0.169805
apoc2	ENSDARG00000092155	568972	19.6722	43.9914	279.592	8.67661	2.0442	15.8408	-3.68934	0.000753902
apoc4	ENSDARG00000075614	570390	0	0	5.86556	2.8922	0	0	-1.01287	1
apoda.1	ENSDARG00000060345	767642	24.356	46.9242	80.1627	19.2814	21.4641	21.7811	-1.27572	0.153857
apoda.2	ENSDARG00000060350	100148022	23.4193	8.79828	87.0059	0	1.0221	0	-6.80501	2.60168e-05
apodb	ENSDARG00000057437	567972	32.787	52.7897	260.04	78.0895	25.5526	99.005	-0.76938	0.522686
apoea	ENSDARG00000102004	553587	10.3045	26.3948	130.02	35.6705	2.0442	11.8806	-1.7461	0.207218
apoeb	ENSDARG00000040295	30314	2737.25	6564.49	10860.1	1800.88	2192.41	1752.39	-1.81107	0.000539244
apof	ENSDARG00000090980	793418	141.452	238.531	640.324	5500.01	5262.8	3605.76	3.81605	4.2659e-11
apol1	ENSDARG00000007425	560340	91.8036	109.49	142.729	248.73	330.139	318.796	1.38388	0.00199014
apom	ENSDARG00000076838	569714	7.49417	18.5741	49.8573	28.922	0	28.7115	-0.395556	0.86061
apooa	ENSDARG00000104696	641319	46.8386	120.243	87.0059	52.0597	23.5084	39.602	-1.13986	0.138149
apoob	ENSDARG00000109942	449837	285.715	164.235	295.233	271.867	655.168	286.125	0.702772	0.287946
apool	ENSDARG00000111985	541537	69.3211	101.669	122.199	88.6943	145.139	124.746	0.290483	0.730251
apopt1	ENSDARG00000092473	798687	110.539	163.257	184.765	213.059	145.139	192.07	0.263597	0.72845
appa	ENSDARG00000104279	58083	4881.51	3980.73	5142.14	3445.58	3456.75	2899.86	-0.514707	0.231194
appb	ENSDARG00000109552	170846	2744.74	2779.28	4281.86	5744.88	5664.49	5078.96	0.749741	0.0751515
appbp2	ENSDARG00000007566	322995	232.319	158.369	71.3644	111.832	349.559	277.214	0.676123	0.414296
appl1	ENSDARG00000060734	571540	81.4991	43.9914	24.4398	47.2393	93.0113	52.4727	0.360559	0.751061
appl2	ENSDARG00000078139	100000135	26.2296	64.5207	68.4316	55.916	25.5526	25.7413	-0.568352	0.602871
aprt	ENSDARG00000003519	393641	87.1197	194.54	179.877	99.299	160.47	223.751	0.0673019	0.952564
aptx	ENSDARG00000027143	405797	59.0166	33.2379	31.283	39.5268	75.6356	40.5921	0.332582	0.766239
aqp10a	ENSDARG00000112181	436621	11.2413	11.731	9.77594	3.85627	0	2.97015	-2.25465	1
aqp10b	ENSDARG00000058678	100034395	17.7987	5.86552	1.95519	1.92814	1.0221	3.9602	-1.89058	1
aqp11	ENSDARG00000100555	553476	233.256	194.54	224.847	549.519	699.118	397.01	1.33413	0.00166717
aqp12	ENSDARG00000043279	436844	26.2296	28.35	58.6556	39.5268	12.2652	33.6617	-0.404151	0.760105
aqp1a.1	ENSDARG00000023713	335821	754.101	519.099	1455.64	116.652	84.8345	96.0349	-3.19685	1.42465e-10
aqp1a.2	ENSDARG00000091027	559284	7.49417	33.2379	88.9611	14.461	2.0442	9.9005	-2.29203	0.0655159
aqp3a	ENSDARG00000003808	406777	865.577	1904.34	3149.81	7178.45	10678.9	8515.42	2.15549	2.23992e-05
aqp4	ENSDARG00000010565	445293	57.143	56.7	18.5743	15.4251	12.2652	19.801	-1.47921	0.115564
aqp7	ENSDARG00000026787	334529	23.4193	5.86552	12.7087	24.1017	40.8841	14.8508	0.924082	0.490672
aqp8a.1	ENSDARG00000115150	447923	22.4825	50.8345	128.065	68.4488	15.3315	11.8806	-1.07182	0.377092
aqp8a.2	ENSDARG00000113224	563130	2.81031	18.5741	51.8125	0	2.0442	0	-5.18884	0.00419681
aqp8b	ENSDARG00000089749	555598	14.9883	7.82069	16.6191	2.8922	0	5.9403	-2.15434	0.23963
aqp9a		606660	68.3843	108.512	151.527	41.4549	93.0113	214.841	0.0890456	0.94912
aqp9b	ENSDARG00000053480	570191	107.729	25.4173	2.93278	19.2814	15.3315	10.8906	-1.58107	0.251448
aqr	ENSDARG00000016775	393436	177.05	317.716	172.057	224.628	195.222	217.811	-0.0642607	0.944913
ar	ENSDARG00000114287	100005148	163.935	165.212	186.72	420.334	325.029	234.642	0.925958	0.0554425
araf	ENSDARG00000054533	403063	636.068	697.997	689.204	810.781	1341	1375.18	0.801694	0.069722
arap1		101883993	2.81031	5.86552	0	0	2.0442	7.9204	0.199161	1
arap3	ENSDARG00000076801	558931	163.935	136.862	96.7818	356.705	622.46	390.08	1.78358	0.000103865
arcn1a	ENSDARG00000002792	266982	258.549	251.24	392.015	319.107	455.858	344.538	0.311919	0.634634
arcn1b	ENSDARG00000031214	399661	526.465	503.457	589.489	683.524	1560.75	1189.05	1.08405	0.0196562
areg	ENSDARG00000076853	101884611	9.36771	3.91035	17.5967	0.964068	0	0.99005	-3.96949	1
arel1	ENSDARG00000100359	100332031	32.787	31.2828	41.0589	12.5329	33.7294	35.6418	-0.3613	0.776652
arf1	ENSDARG00000009484	114428	654.803	1048.95	856.372	1650.48	1733.49	1358.35	0.889442	0.0316082
arf2a	ENSDARG00000014763	399477	2518.04	2894.63	3676.73	3721.3	5162.64	3947.33	0.497406	0.295813
arf2b	ENSDARG00000016393	327026	1043.56	1345.16	1168.22	1169.41	1511.69	1397.95	0.197587	0.738101
arf3a	ENSDARG00000070539	445047	80.5623	49.8569	163.258	5.78441	2.0442	2.97015	-4.75766	1.8506e-08
arf3b	ENSDARG00000112366	368822	23.4193	8.79828	4.88797	2.8922	0	6.93035	-1.91555	1
arf4a	ENSDARG00000045989	445196	39.3444	43.9914	30.3054	24.1017	62.3482	62.3732	0.388152	0.729142
arf4b	ENSDARG00000100339	550402	32.787	133.929	10.7535	72.3051	116.52	77.2239	0.584304	0.651069
arf5	ENSDARG00000115687	378724	1520.38	2070.53	1856.45	2514.29	3571.23	2900.85	0.722182	0.0830465
arf6a	ENSDARG00000101626	336063	519.908	849.523	716.576	1095.18	1062.99	966.289	0.58296	0.21376
arf6b	ENSDARG00000052928	100003206	543.327	807.487	989.325	1038.3	1373.71	953.419	0.524238	0.327009
arfgap1	ENSDARG00000101616	100149572	222.952	326.514	436.985	408.765	396.576	362.358	0.243563	0.72845
arfgap2	ENSDARG00000067601	641490	792.508	915.021	649.122	1098.07	1350.2	1093.02	0.587495	0.188544
arfgap3	ENSDARG00000097583	402889	104.918	119.266	160.325	88.6943	130.829	136.627	-0.110629	0.905335
arfgef1	ENSDARG00000063474	100329953	637.004	657.916	777.187	595.794	639.836	707.886	-0.0924149	0.891343
arfgef2	ENSDARG00000074702	100334572	558.316	497.592	479.999	703.77	951.577	628.682	0.572362	0.226061
arfgef3	ENSDARG00000077656	562652	122.717	74.2966	108.513	74.2332	22.4862	41.5821	-1.14208	0.121256
arfip1	ENSDARG00000116473	100003895	271.664	306.962	394.948	340.316	805.417	527.697	0.781344	0.157889
arfip2a	ENSDARG00000059244	449664	376.582	198.45	176.945	210.167	504.919	353.448	0.506358	0.493506
arfip2b	ENSDARG00000109805	550342	40.2812	42.0362	44.9693	45.3112	38.8399	34.6518	-0.0991283	0.936323
arfrp1	ENSDARG00000057857	503602	63.7004	43.9914	47.9021	63.6285	89.945	107.916	0.748154	0.294947
arg1	ENSDARG00000110741	570368	7.49417	7.82069	1.95519	13.497	0	1.9801	-0.154618	1
arg2	ENSDARG00000039269	322614	406.559	786.957	200.407	472.393	261.658	276.224	-0.464214	0.581211
arglu1a	ENSDARG00000019223	406834	1209.37	1094.9	1621.83	1218.58	1136.58	859.364	-0.288466	0.625151
arglu1b	ENSDARG00000018319	393131	772.836	501.502	879.835	447.328	547.847	524.727	-0.503244	0.341175
arhgap1	ENSDARG00000024324	550478	92.7403	102.647	121.222	171.604	152.293	111.876	0.461165	0.490715
arhgap10	ENSDARG00000078326	692277	251.055	255.15	273.726	389.484	541.714	452.453	0.826964	0.0544955
arhgap11a	ENSDARG00000100019	406608	226.699	283.5	170.101	130.149	272.901	187.12	-0.205467	0.805437
arhgap12a	ENSDARG00000008548	563267	281.031	364.64	254.174	100.263	116.52	153.458	-1.28129	0.00510004
arhgap12b	ENSDARG00000109973	393848	670.728	511.278	490.752	238.125	333.205	203.95	-1.10975	0.0112558
arhgap15	ENSDARG00000062349	100003547	26.2296	40.0811	78.2075	5.78441	14.3094	12.8707	-2.13413	0.0189504
arhgap17a	ENSDARG00000113457	550254	49.6489	57.6776	52.7901	86.7661	55.1935	72.2737	0.420772	0.621758
arhgap17b	ENSDARG00000062263	100141341	123.654	157.391	232.667	448.292	723.648	425.722	1.63708	0.000463753
arhgap18	ENSDARG00000074740	100004252	33.7238	37.1483	17.5967	67.4848	22.4862	45.5423	0.61596	0.581171
arhgap19	ENSDARG00000083189	100537002	87.1197	95.8035	108.513	122.437	94.0334	80.1941	0.0261182	0.979791
arhgap20	ENSDARG00000089326	796434	266.98	151.526	122.199	107.012	68.4809	92.0747	-1.01485	0.0911288
arhgap20b		100002649	37.4708	31.2828	19.5519	41.4549	16.3536	49.5025	0.281588	0.835474
arhgap21b	ENSDARG00000075673	326745	611.712	726.347	895.476	548.555	759.422	617.792	-0.213926	0.736375
arhgap22	ENSDARG00000021255	562503	114.286	88.9604	159.348	81.9458	26.5747	49.5025	-1.19676	0.0853508
arhgap23a	ENSDARG00000052950	100006233	844.031	1120.31	1349.08	928.398	1182.57	906.886	-0.134791	0.844842
arhgap23b	ENSDARG00000026840	562244	133.958	90.9156	18.5743	41.4549	2.0442	9.9005	-2.18589	0.0570345
arhgap24	ENSDARG00000100973	100005116	142.389	143.705	161.303	164.856	205.443	223.751	0.408945	0.503221
arhgap25	ENSDARG00000061784	562468	14.9883	26.3948	39.1038	25.0658	5.11051	17.8209	-0.742707	0.599458
arhgap27	ENSDARG00000104255	564211	25.2928	33.2379	11.7311	22.1736	7.15472	17.8209	-0.573781	0.703548
arhgap27l	ENSDARG00000061798	566523	96.4874	207.248	365.62	100.263	192.155	231.672	-0.352898	0.716923
arhgap28		492794	24.356	25.4173	7.82075	27.958	61.3261	45.5423	1.22556	0.209786
arhgap29a	ENSDARG00000026329	564805	157.378	129.041	145.662	451.184	713.427	525.717	1.96765	1.08745e-06
arhgap29b	ENSDARG00000017748	378998	319.439	421.34	563.094	617.968	894.339	787.09	0.818514	0.081886
arhgap31	ENSDARG00000059472	101885883	132.085	130.019	38.1262	152.323	261.658	313.846	1.27705	0.0539797
arhgap32a	ENSDARG00000075334	562449	204.216	157.391	283.502	71.341	39.862	38.612	-2.1052	6.98992e-05
arhgap32b	ENSDARG00000074184	569434	1008.9	852.456	1035.27	561.088	1408.46	815.802	-0.0566592	0.951644
arhgap33	ENSDARG00000011333	569720	526.465	639.342	561.139	261.262	392.487	424.732	-0.679347	0.154564
arhgap35	ENSDARG00000113130	564565	782.204	534.74	996.168	497.459	720.582	542.548	-0.393882	0.514289
arhgap39	ENSDARG00000100007	101884459	58.0798	25.4173	25.4174	20.2454	11.2431	23.7612	-0.97904	0.364111
arhgap42a	ENSDARG00000116136	566275	363.467	295.231	310.875	1320.77	1719.18	1303.9	2.16341	1.55949e-09
arhgap44	ENSDARG00000104549	100333556	15.9251	24.4397	21.5071	13.497	0	4.95025	-1.73979	0.272764
arhgap4a	ENSDARG00000039265	393416	28.1031	67.4535	87.9835	29.8861	14.3094	29.7015	-1.31058	0.13042
arhgap4b	ENSDARG00000015003	561231	286.652	321.626	413.522	156.179	110.387	164.348	-1.24521	0.00548747
arhgap5	ENSDARG00000061294	795752	719.44	917.954	940.445	1355.48	1605.72	1480.13	0.784861	0.0461028
arhgap6		101882360	96.4874	165.212	82.1179	318.142	327.073	301.965	1.46222	0.00200783
arhgap9		100334461	24.356	26.3948	6.84316	0	9.19892	18.811	-1.04179	0.59424
arhgdia	ENSDARG00000043795	406770	1207.5	2668.81	3344.35	2410.17	2802.6	3504.78	0.271825	0.720945
arhgdig	ENSDARG00000004034	394132	592.976	941.416	1678.53	895.619	365.913	582.15	-0.801101	0.21559
arhgef10	ENSDARG00000115629	334278	103.982	87.9828	68.4316	130.149	240.194	177.219	1.07159	0.0512282
arhgef10la	ENSDARG00000088630	799435	89.93	57.6776	77.2299	71.341	82.7903	65.3433	-0.0354079	0.975093
arhgef10lb	ENSDARG00000074244	567649	70.2578	64.5207	67.454	33.7424	38.8399	17.8209	-1.16209	0.112246
arhgef11		565268	87.1197	82.1173	79.1851	79.0536	18.3978	49.5025	-0.755942	0.395293
arhgef12a	ENSDARG00000030532	562455	308.198	458.488	326.516	598.686	694.007	663.334	0.839433	0.0507848
arhgef12b	ENSDARG00000100913	571031	537.707	706.795	627.615	881.158	1172.35	1169.25	0.783639	0.0586434
arhgef15	ENSDARG00000100293	101882903	40.2812	25.4173	16.6191	2.8922	12.2652	10.8906	-1.66391	0.160793
arhgef16	ENSDARG00000077114	567180	68.3843	160.324	202.362	50.1315	25.5526	49.5025	-1.78248	0.0061507
arhgef18a	ENSDARG00000011157	407987	138.642	192.585	230.712	71.341	84.8345	94.0548	-1.16712	0.0224807
arhgef18b	ENSDARG00000042308	562264	247.308	267.859	245.376	146.538	290.277	242.562	-0.163169	0.836871
arhgef19	ENSDARG00000078853	569202	73.0681	131.974	140.774	79.0536	39.862	33.6617	-1.17907	0.0872955
arhgef1a	ENSDARG00000040380	368266	198.595	252.217	282.525	419.37	766.577	381.169	1.09553	0.026028
arhgef1b	ENSDARG00000055837	557983	1608.44	1448.78	1249.37	4032.7	6838.89	4256.23	1.81255	2.52278e-06
arhgef2	ENSDARG00000116451	561276	88.0565	70.3862	33.2382	40.4909	15.3315	55.4428	-0.784157	0.435076
arhgef25a	ENSDARG00000100606	100331456	456.208	594.373	459.469	1499.13	2094.29	1292.02	1.69389	1.21308e-05
arhgef25b	ENSDARG00000114202	569561	235.13	123.176	192.586	27.958	29.641	21.7811	-2.7954	1.62875e-07
arhgef28	ENSDARG00000112290	559941	87.1197	82.1173	31.283	80.9817	111.409	72.2737	0.399647	0.678242
arhgef3	ENSDARG00000013834	570228	58.0798	31.2828	18.5743	16.3892	12.2652	29.7015	-0.887691	0.441823
arhgef33	ENSDARG00000097964	559216	54.3327	48.8793	175.967	47.2393	19.4199	73.2637	-0.995585	0.304612
arhgef37	ENSDARG00000115787	101883655	41.2179	49.8569	25.4174	53.0237	25.5526	28.7115	-0.117752	0.933433
arhgef38	ENSDARG00000079377	100317614	59.9534	40.0811	108.513	5.78441	22.4862	27.7214	-1.89881	0.0284482
arhgef39	ENSDARG00000114412	492469	67.4475	75.2742	57.678	53.0237	142.072	64.3533	0.37164	0.703844
arhgef3l	ENSDARG00000037554	553761	22.4825	33.2379	93.849	32.7783	11.2431	26.7314	-1.07784	0.320586
arhgef4	ENSDARG00000012914	559017	1033.26	1112.49	1541.67	1892.47	1789.7	1411.81	0.466222	0.349123
arhgef40	ENSDARG00000078979	100151026	74.0049	75.2742	23.4623	140.754	99.1439	118.806	1.0539	0.142741
arhgef5		100537160	151.757	283.5	517.147	125.329	132.873	194.05	-1.07425	0.0877255
arhgef6	ENSDARG00000006683	558288	432.788	621.745	719.509	836.811	1609.81	1081.14	0.991721	0.0364858
arhgef7a	ENSDARG00000114088	553493	684.78	382.236	665.742	228.484	434.393	277.214	-0.882524	0.0953097
arhgef7b	ENSDARG00000073848	494081	653.866	583.619	643.257	795.356	1644.56	1146.48	0.931125	0.0417409
arhgef9a	ENSDARG00000061746	559868	169.556	95.8035	234.623	57.8441	39.862	73.2637	-1.54765	0.00911531
arhgef9b	ENSDARG00000110276	560923	141.452	106.557	290.345	44.3471	19.4199	32.6717	-2.47913	7.37104e-05
arid1aa	ENSDARG00000101710	100141358	1611.25	1709.8	1662.89	1412.36	1871.47	1752.39	0.0150268	0.983698
arid1ab	ENSDARG00000101891	568161	1786.42	1970.81	2249.44	1630.24	2412.16	2057.32	0.022154	0.977743
arid1b	ENSDARG00000092503	569589	1156.91	1075.35	1572.95	1331.38	1540.31	1173.21	0.0881231	0.901157
arid2	ENSDARG00000007413	566352	890.869	966.833	926.759	721.123	731.825	742.538	-0.342848	0.480643
arid3a	ENSDARG00000070843	562799	33.7238	68.4311	27.3726	46.2753	23.5084	51.4826	-0.0939347	0.949511
arid3b	ENSDARG00000104034	571249	845.904	1008.87	932.625	1392.11	1914.4	1331.62	0.734606	0.0783144
arid3c	ENSDARG00000114447	569444	546.138	682.355	969.773	944.787	1246.96	1038.56	0.555346	0.275389
arid4a	ENSDARG00000043873	327404	1441.69	1734.24	1553.4	1910.78	1889.87	1762.29	0.234232	0.661385
arid4b	ENSDARG00000090656	100537923	68.3843	55.7224	27.3726	57.8441	23.5084	51.4826	-0.18905	0.884814
arid5a	ENSDARG00000077120	100462698	27.1664	10.7535	6.84316	11.5688	2.0442	16.8309	-0.555817	0.782694
arid5b	ENSDARG00000037196	100536827	367.214	463.376	465.335	496.495	873.897	605.911	0.608758	0.23203
arid6	ENSDARG00000069988	572528	29.0399	18.5741	26.395	17.3532	5.11051	25.7413	-0.617261	0.67282
arih1	ENSDARG00000109413	327005	317.565	209.204	312.83	204.382	389.421	188.11	-0.103103	0.910885
arih1l	ENSDARG00000112965	405859	52.4592	60.6104	33.2382	46.2753	89.945	86.1344	0.603124	0.482905
arih2	ENSDARG00000012848	406417	510.54	553.314	493.685	598.686	791.107	648.483	0.388005	0.444194
arl1	ENSDARG00000101680	436746	383.139	439.914	358.777	337.424	607.129	551.458	0.339947	0.585795
arl10	ENSDARG00000117130	560654	10.3045	17.5966	15.6415	44.3471	2.0442	8.91045	0.347862	0.872287
arl11	ENSDARG00000036637	324689	44.965	48.8793	82.1179	45.3112	22.4862	33.6617	-0.792801	0.365855
arl13a	ENSDARG00000052575	793658	221.078	174.988	53.7677	114.724	25.5526	33.6617	-1.3698	0.117646
arl13b	ENSDARG00000012763	286784	340.048	207.248	198.452	187.029	318.896	196.03	-0.0878605	0.925613
arl14	ENSDARG00000063223	556921	16.8619	4.88793	5.86556	6.74848	0	4.95025	-1.236	1
arl14ep	ENSDARG00000001210	751672	262.296	391.035	567.982	348.993	259.614	313.846	-0.404595	0.537851
arl15a	ENSDARG00000114295	567657	44.965	39.1035	35.1934	0	8.17682	7.9204	-2.8957	0.00783251
arl15b	ENSDARG00000109775	560030	348.479	379.304	500.528	693.165	724.671	577.199	0.699815	0.118362
arl16	ENSDARG00000110386	100037345	52.4592	26.3948	33.2382	24.1017	55.1935	29.7015	-0.0424384	0.978364
arl2	ENSDARG00000112191	449774	142.389	217.024	460.447	424.19	258.592	310.876	0.277743	0.756441
arl2bp	ENSDARG00000114401	393976	43.0915	50.8345	25.4174	15.4251	36.7957	45.5423	-0.288815	0.824046
arl3	ENSDARG00000113228	797451	407.495	261.993	364.643	414.549	742.046	504.926	0.683822	0.19326
arl3l1	ENSDARG00000111106	393666	286.652	123.176	67.454	38.5627	43.9504	38.612	-1.97904	0.00325348
arl3l2	ENSDARG00000015404	393692	186.417	105.579	58.6556	20.2454	19.4199	38.612	-2.16366	0.00177621
arl4aa	ENSDARG00000099918	393834	201.406	366.595	321.628	72.3051	108.343	99.9951	-1.66475	0.000478352
arl4ab	ENSDARG00000110649	338267	119.907	210.181	218.003	565.908	448.703	493.045	1.46027	0.000851013
arl4ca	ENSDARG00000057606	550444	54.3327	63.5431	50.8349	121.473	187.045	130.687	1.38007	0.00860312
arl4cb	ENSDARG00000110274	406531	229.509	258.083	360.732	159.071	381.244	181.179	-0.233944	0.784551
arl4d	ENSDARG00000114046	323573	400.001	523.009	371.486	561.088	498.786	501.956	0.270933	0.648551
arl5a	ENSDARG00000117003	436611	185.481	309.895	407.657	409.729	502.874	280.184	0.401622	0.569122
arl5c	ENSDARG00000035719	393819	499.299	987.362	280.569	1994.66	1739.62	1346.47	1.5236	0.00424793
arl6	ENSDARG00000113281	494134	234.193	87.0052	85.0507	207.275	164.558	122.766	0.283391	0.767474
arl6ip1	ENSDARG00000112340	394087	2237.01	2882.9	3608.3	1965.73	2128.02	2165.24	-0.47974	0.31342
arl6ip4	ENSDARG00000116805	553796	237.003	290.343	432.097	233.304	219.752	275.234	-0.397479	0.529303
arl6ip5a	ENSDARG00000114089	450076	60.8901	55.7224	43.0141	35.6705	82.7903	41.5821	0.00236561	0.998505
arl6ip5b	ENSDARG00000016238	436790	385.95	391.035	535.722	985.278	1027.21	786.1	1.09221	0.0059385
arl6ip6	ENSDARG00000071013	100037347	150.82	236.576	234.623	142.682	286.189	221.771	0.0647655	0.947246
arl8	ENSDARG00000094709	327551	560.189	417.429	312.83	378.879	1060.94	823.722	0.810473	0.176617
arl8a	ENSDARG00000078686	567222	1407.03	1055.79	1597.39	1278.35	1630.25	1324.69	0.0601834	0.935721
arl8ba	ENSDARG00000006915	337424	265.106	321.626	540.609	384.663	485.499	391.07	0.16198	0.836125
arl8bb	ENSDARG00000070318	562445	50.5856	63.5431	46.9245	34.7065	50.083	48.5125	-0.273289	0.788934
arl9	ENSDARG00000071881	751670	70.2578	28.35	10.7535	23.1376	74.6135	53.4627	0.465351	0.736564
armc1	ENSDARG00000013861	494066	42.1547	18.5741	31.283	8.67661	32.7073	16.8309	-0.663363	0.615934
armc10	ENSDARG00000062960	557740	145.2	243.419	139.796	102.191	130.829	161.378	-0.422021	0.557714
armc1l	ENSDARG00000020887	321240	271.664	415.474	470.223	177.389	280.056	289.095	-0.632614	0.261792
armc2	ENSDARG00000022660	555846	65.574	12.7086	19.5519	23.1376	8.17682	19.801	-0.936404	0.485301
armc3	ENSDARG00000074708	560136	43.0915	21.5069	20.5295	1.92814	0	5.9403	-3.43122	0.00777628
armc4	ENSDARG00000111868	799229	69.3211	50.8345	43.0141	21.2095	8.17682	11.8806	-1.9807	0.0132492
armc5	ENSDARG00000078083	569910	182.67	123.176	100.692	80.0177	131.851	129.697	-0.252006	0.768242
armc6	ENSDARG00000103770	555425	57.143	90.9156	67.454	87.7302	72.5693	103.955	0.294752	0.735374
armc7	ENSDARG00000061197	767659	58.0798	77.2293	113.401	122.437	84.8345	75.2438	0.184684	0.851846
armc8	ENSDARG00000110157	571528	87.1197	95.8035	70.3868	119.544	118.564	140.587	0.580091	0.355736
armc9	ENSDARG00000087299	100334308	107.729	144.683	112.423	162.928	128.785	135.637	0.22856	0.76509
armt1	ENSDARG00000112391	541518	49.6489	49.8569	17.5967	90.6224	32.7073	46.5324	0.537013	0.63449
arnt	ENSDARG00000115999	493634	267.917	491.726	422.321	1601.32	364.891	648.483	1.14568	0.081083
arnt2	ENSDARG00000103697	64277	64.6372	37.1483	49.8573	50.1315	30.6631	41.5821	-0.309096	0.771166
arntl1a	ENSDARG00000006791	58098	320.376	151.526	285.457	438.651	629.615	182.169	0.723143	0.316147
arntl1b	ENSDARG00000114562	352935	200.469	88.9604	75.2747	341.28	347.515	85.1443	1.08499	0.16259
arntl2	ENSDARG00000116327	58099	70.2578	43.0138	37.1486	114.724	97.0997	26.7314	0.664818	0.507576
arpc1a	ENSDARG00000008383	394243	814.054	904.268	1444.88	1402.72	2143.35	1550.42	0.688123	0.167697
arpc1b	ENSDARG00000027063	335474	433.725	507.367	691.159	885.979	1854.09	1204.89	1.27314	0.00549599
arpc2	ENSDARG00000075989	327068	910.542	1583.69	2008.96	1975.38	2429.54	2289	0.571945	0.287091
arpc3	ENSDARG00000057882	415204	657.613	1196.57	2125.29	1374.76	1704.87	1442.5	0.184472	0.828427
arpc4	ENSDARG00000054063	114456	449.65	608.059	1071.44	592.902	1078.32	659.374	0.130408	0.884825
arpc4l	ENSDARG00000058225	445305	561.126	701.907	1041.14	994.918	1376.77	1182.12	0.625155	0.215021
arpc5a	ENSDARG00000039142	336504	517.098	865.164	1523.09	963.104	1547.46	999.951	0.272997	0.736375
arpc5b	ENSDARG00000019062	399482	444.966	746.876	1389.16	701.842	1162.13	897.976	0.0977809	0.920963
arpc5la	ENSDARG00000041720	393550	148.947	182.809	256.13	221.736	213.619	220.781	0.158731	0.837584
arpc5lb	ENSDARG00000035433	556104	234.193	317.716	476.088	336.46	483.454	305.926	0.131193	0.876976
arpin	ENSDARG00000115959	550477	44.0282	90.9156	114.378	215.951	173.757	144.547	1.10037	0.0691125
arpp19a	ENSDARG00000109679	393603	891.806	1039.17	1632.58	1405.61	1805.03	1591.01	0.430235	0.438223
arpp19b	ENSDARG00000039880	393947	340.048	560.157	641.302	482.998	460.968	532.647	-0.0618867	0.941394
arpp21	ENSDARG00000061081	564134	107.729	140.772	143.706	94.4787	148.205	61.3831	-0.367581	0.659285
arr3a	ENSDARG00000114648	436678	2778.46	1688.29	734.173	342.244	441.548	451.463	-2.07406	7.1893e-05
arr3b	ENSDARG00000098475	796867	1801.41	764.473	918.938	534.094	191.133	480.174	-1.53143	0.00623164
arrb1	ENSDARG00000043241	553266	34.6605	12.7086	19.5519	42.419	45.9946	37.6219	0.911511	0.349881
arrb2a	ENSDARG00000039215	321378	328.807	198.45	413.522	238.125	354.669	237.612	-0.180261	0.824202
arrb2b	ENSDARG00000011545	394099	711.009	923.819	1151.61	768.362	1451.39	1078.16	0.243102	0.726267
arrdc1a	ENSDARG00000068148	100006005	103.982	168.145	182.81	63.6285	42.9283	46.5324	-1.57026	0.00386484
arrdc1b	ENSDARG00000109340	570029	151.757	139.795	151.527	73.2692	79.724	139.597	-0.598734	0.365247
arrdc2	ENSDARG00000020761	335206	576.114	854.411	1388.18	3019.46	3050.98	2732.54	1.64304	0.000160211
arrdc3a	ENSDARG00000052690	566685	1404.22	912.088	1296.29	4308.42	4338.82	2455.33	1.61975	8.78632e-05
arrdc3b	ENSDARG00000036028	447866	1235.6	1172.13	1895.55	4026.91	2245.56	1928.62	0.930428	0.0627078
arsa	ENSDARG00000042270	541416	23.4193	4.88793	5.86556	13.497	1.0221	2.97015	-0.963676	0.674775
arsb	ENSDARG00000108788	100538007	16.8619	4.88793	0	2.8922	1.0221	5.9403	-1.14278	1
arsg	ENSDARG00000101715	564790	40.2812	40.0811	30.3054	10.6047	64.3924	90.0946	0.576204	0.649803
arsh	ENSDARG00000002299	100332997	34.6605	49.8569	22.4847	65.5566	28.6189	54.4528	0.474995	0.665161
arsia	ENSDARG00000077606	100329483	44.965	64.5207	29.3278	390.448	219.752	266.324	2.65894	2.35148e-07
arsk	ENSDARG00000115105	562412	41.2179	46.9242	44.9693	28.922	67.4587	49.5025	0.131256	0.915898
art4	ENSDARG00000078178	555597	12.178	7.82069	2.93278	6.74848	11.2431	1.9801	-0.202423	1
artn		101882107	24.356	11.731	1.95519	20.2454	1.0221	12.8707	-0.155532	0.955863
arv1	ENSDARG00000074757	568203	121.78	106.557	129.042	132.077	117.542	95.0448	-0.0521813	0.957052
arvcfa	ENSDARG00000074329	572216	48.7121	14.6638	21.5071	14.461	1.0221	6.93035	-1.91703	0.147909
arvcfb	ENSDARG00000061688	564669	842.157	1022.56	1169.2	2030.33	1759.04	1591.01	0.82659	0.0371867
arxa	ENSDARG00000058011	30657	27.1664	4.88793	15.6415	4.82034	2.0442	18.811	-0.893721	0.648537
arxb	ENSDARG00000101523	100329907	29.9767	15.6414	36.171	0	5.11051	2.97015	-3.35031	0.00909403
as3mt	ENSDARG00000027572	664699	72.1314	149.571	147.617	71.341	261.658	168.309	0.440673	0.638659
asah1a	ENSDARG00000112187	450068	85.2462	84.0725	136.863	248.73	223.84	176.229	1.08371	0.0349524
asah1b	ENSDARG00000116060	393549	167.682	342.155	358.777	280.544	466.079	378.199	0.372996	0.603958
asah2	ENSDARG00000012829	493602	14.0516	3.91035	11.7311	23.1376	16.3536	23.7612	1.08988	0.418975
asap1a	ENSDARG00000029463	100170829	1084.78	1043.08	1400.89	1196.41	2074.87	1489.04	0.431851	0.426549
asap1b	ENSDARG00000039729	565859	671.665	414.497	375.396	364.418	619.394	441.563	-0.0364723	0.968343
asap2a	ENSDARG00000010181	570669	371.898	337.267	402.769	221.736	312.763	257.413	-0.489886	0.346474
asap2b	ENSDARG00000019564	560581	81.4991	75.2742	94.8266	58.8082	99.1439	92.0747	-0.00956043	0.992337
asap3	ENSDARG00000021896	664764	222.015	705.818	98.737	1213.76	880.03	937.578	1.56226	0.0243246
asb1	ENSDARG00000026635	554673	11.2413	10.7535	3.91038	8.67661	2.0442	9.9005	-0.32767	1
asb10	ENSDARG00000099461	559467	17.7987	5.86552	6.84316	2.8922	11.2431	3.9602	-0.758684	0.727389
asb11	ENSDARG00000056561	791758	14.0516	5.86552	11.7311	2.8922	14.3094	20.7911	0.261417	0.907262
asb12a	ENSDARG00000110715	322927	202.343	323.581	516.17	338.388	420.084	378.199	0.125468	0.886688
asb12b	ENSDARG00000116721	445507	22.4825	17.5966	16.6191	1.92814	8.17682	9.9005	-1.50608	0.280338
asb13a.1	ENSDARG00000109650	436801	76.8152	64.5207	89.9386	39.5268	134.917	52.4727	-0.0285624	0.982961
asb13a.2	ENSDARG00000109879	563551	11.2413	14.6638	10.7535	0.964068	30.6631	3.9602	-0.046015	0.986647
asb13b	ENSDARG00000089833	556808	14.0516	4.88793	1.95519	4.82034	1.0221	8.91045	-0.502585	1
asb14a	ENSDARG00000008473	568371	11.2413	3.91035	7.82075	4.82034	1.0221	7.9204	-0.737908	1
asb14b	ENSDARG00000112104	100535284	14.0516	8.79828	7.82075	44.3471	7.15472	8.91045	0.978915	0.548258
asb15a	ENSDARG00000115823	100151067	22.4825	10.7535	24.4398	22.1736	11.2431	11.8806	-0.347507	0.831589
asb15b	ENSDARG00000045863	568579	10.3045	7.82069	4.88797	23.1376	1.0221	11.8806	0.648613	0.770987
asb16	ENSDARG00000110292	678621	19.6722	8.79828	3.91038	17.3532	4.08841	10.8906	-0.00204833	0.998505
asb18	ENSDARG00000012948	792746	19.6722	8.79828	5.86556	10.6047	15.3315	10.8906	0.0982555	0.965475
asb2a.1	ENSDARG00000003797	567986	20.609	15.6414	6.84316	10.6047	0	4.95025	-1.46553	0.450011
asb2a.2	ENSDARG00000096748	100536271	13.1148	8.79828	10.7535	16.3892	12.2652	5.9403	0.0827451	0.970111
asb2b	ENSDARG00000102490	402848	75.8785	64.5207	94.8266	35.6705	21.4641	20.7911	-1.59248	0.0160646
asb3	ENSDARG00000005246	334210	114.286	126.109	151.527	80.0177	153.315	92.0747	-0.268846	0.747951
asb4	ENSDARG00000034988	550321	63.7004	63.5431	78.2075	9.64068	15.3315	23.7612	-2.07671	0.00340293
asb5a	ENSDARG00000114709	550441	19.6722	15.6414	18.5743	17.3532	8.17682	17.8209	-0.312714	0.850895
asb5b	ENSDARG00000053222	550449	195.785	171.078	290.345	163.892	128.785	125.736	-0.651113	0.257891
asb6	ENSDARG00000007125	553600	26.2296	22.4845	35.1934	17.3532	5.11051	13.8607	-1.20506	0.29598
asb7	ENSDARG00000006494	405798	41.2179	35.1931	12.7087	23.1376	16.3536	10.8906	-0.822762	0.511197
asb8	ENSDARG00000003383	327200	247.308	184.764	265.906	140.754	429.283	276.224	0.277518	0.746324
ascc1	ENSDARG00000077760	550273	51.5224	131.974	174.012	147.502	104.254	123.756	0.0716598	0.952245
ascc2	ENSDARG00000013058	393414	198.595	321.626	292.301	450.22	544.781	440.572	0.8213	0.0761395
ascc3	ENSDARG00000086678	100332599	57.143	74.2966	40.0814	33.7424	25.5526	71.2836	-0.393129	0.72422
ascl1a	ENSDARG00000038386	30466	693.211	875.918	671.607	27.958	21.4641	72.2737	-4.20208	8.40831e-15
ascl1b	ENSDARG00000101628	30478	133.958	142.728	449.693	8.67661	4.08841	9.9005	-4.99849	8.25055e-12
asf1ba	ENSDARG00000101037	386897	303.514	559.18	462.402	165.82	615.306	418.791	-0.143325	0.88844
asf1bb	ENSDARG00000043713	792029	336.301	391.035	488.797	188.957	390.443	350.478	-0.387377	0.563676
ash1l	ENSDARG00000070981	563799	1428.58	1660.92	1466.39	1661.09	1671.14	1716.75	0.148271	0.798943
ash2l	ENSDARG00000060392	558193	541.454	772.293	785.986	484.926	815.638	675.214	-0.087833	0.910885
asic1a	ENSDARG00000008329	791696	22.4825	26.3948	19.5519	17.3532	5.11051	11.8806	-0.99177	0.446561
asic1b	ENSDARG00000101866	407672	235.13	191.607	328.472	368.274	529.449	435.622	0.820036	0.0937686
asic1c	ENSDARG00000098428	407670	65.574	71.3638	133.93	35.6705	28.6189	38.612	-1.39555	0.0355313
asic2	ENSDARG00000006849	407669	154.567	57.6776	176.945	38.5627	28.6189	25.7413	-2.06588	0.00142902
asic4a	ENSDARG00000025162	407668	17.7987	8.79828	12.7087	27.958	12.2652	8.91045	0.32246	0.86073
asic4b	ENSDARG00000004243	407667	29.0399	26.3948	20.5295	23.1376	2.0442	8.91045	-1.15217	0.413237
asip1	ENSDARG00000077858	798574	172.366	338.245	269.816	815.602	1307.27	824.712	1.91737	1.47874e-05
asip2b	ENSDARG00000114760	796595	43.0915	80.1621	59.6332	205.347	171.713	133.657	1.48236	0.00526428
asl	ENSDARG00000033361	393423	59.9534	63.5431	88.9611	118.58	101.188	115.836	0.660067	0.305889
asmt	ENSDARG00000098249	100141344	96.4874	119.266	71.3644	40.4909	18.3978	40.5921	-1.52773	0.0204418
asmt2	ENSDARG00000109921	568256	52.4592	66.4759	43.0141	97.3709	106.299	94.0548	0.878409	0.160191
asmtl	ENSDARG00000114151	324134	246.371	209.204	205.295	239.089	255.526	162.368	-0.00868766	0.991802
asna1	ENSDARG00000018190	325704	96.4874	88.9604	91.8938	86.7661	159.448	83.1642	0.24739	0.778689
asns	ENSDARG00000016375	394138	278.221	328.469	293.278	165.82	225.885	207.911	-0.586022	0.247776
asnsd1	ENSDARG00000000540	368827	148.947	206.271	193.564	135.934	169.669	276.224	0.0844489	0.929107
aspa	ENSDARG00000005154	557232	19.6722	26.3948	34.2158	29.8861	38.8399	16.8309	0.0918584	0.954582
aspdh	ENSDARG00000038297	447919	1.87354	3.91035	11.7311	5.78441	0	3.9602	-0.840283	1
aspg	ENSDARG00000052942	100124594	197.659	158.369	235.6	354.777	252.459	159.398	0.374014	0.608447
asph	ENSDARG00000055945	323659	730.681	612.947	499.551	566.872	1740.64	1523.69	1.05548	0.056563
asphd1	ENSDARG00000075813	557921	102.108	43.9914	112.423	10.6047	1.0221	6.93035	-3.79246	8.7683e-06
asphd2	ENSDARG00000059629	569819	207.963	174.988	371.486	243.909	290.277	258.403	0.0712112	0.939094
aspm	ENSDARG00000103754	554173	1159.72	2338.39	1214.17	640.141	847.323	701.946	-1.10591	0.0168598
aspn	ENSDARG00000002192	65228	1576.59	2982.62	830.955	1792.2	5136.06	3737.44	0.984567	0.139779
aspscr1	ENSDARG00000105321	550237	159.251	216.047	178.9	169.676	208.509	210.881	0.0880409	0.914525
asrgl1	ENSDARG00000021681	541402	45.9018	35.1931	43.0141	16.3892	62.3482	47.5224	0.0232665	0.987892
ass1		447864	177.987	303.052	264.928	192.814	104.254	161.378	-0.701712	0.236254
aste1	ENSDARG00000070132	100006826	41.2179	35.1931	11.7311	17.3532	42.9283	74.2538	0.608883	0.635225
aste1b	ENSDARG00000062530	100003699	73.0681	39.1035	82.1179	19.2814	67.4587	32.6717	-0.704056	0.481485
astn1	ENSDARG00000068323	791157	626.7	236.576	669.652	49.1675	104.254	60.3931	-2.84286	3.24977e-07
astn2	ENSDARG00000105924	100535087	18.7354	5.86552	12.7087	7.71254	1.0221	4.95025	-1.44335	0.434832
asun	ENSDARG00000011764	334292	237.003	213.114	280.569	277.652	344.448	277.214	0.29947	0.628774
asxl1	ENSDARG00000115751	403066	866.513	625.655	847.574	650.746	794.173	780.16	-0.0725809	0.921039
asxl2	ENSDARG00000076501	100150267	78.6888	46.9242	24.4398	25.0658	21.4641	65.3433	-0.424136	0.738878
asz1	ENSDARG00000116151	572911	15.9251	4.88793	9.77594	13.497	15.3315	6.93035	0.223275	0.918423
atad1a	ENSDARG00000023267	368672	44.0282	26.3948	23.4623	42.419	26.5747	25.7413	0.0128428	0.992639
atad1b	ENSDARG00000056609	368412	20.609	39.1035	21.5071	44.3471	36.7957	15.8408	0.256702	0.857401
atad2b	ENSDARG00000060537	100331225	234.193	372.461	213.115	188.957	199.31	183.159	-0.520587	0.375774
atad3	ENSDARG00000086848	403004	233.256	427.205	453.604	250.658	140.028	224.741	-0.855686	0.12409
atad5a	ENSDARG00000070568	560591	517.098	798.688	484.887	185.101	522.294	411.861	-0.686217	0.280331
atad5b	ENSDARG00000116936	321619	71.1946	88.9604	56.7005	45.3112	78.7019	59.403	-0.242337	0.804038
atat1	ENSDARG00000004472	406389	154.567	67.4535	149.572	32.7783	35.7736	49.5025	-1.6546	0.00743356
atcaya	ENSDARG00000071678	565827	321.312	182.809	423.298	46.2753	15.3315	21.7811	-3.47255	5.51765e-09
atcayb	ENSDARG00000059781	100329872	29.0399	10.7535	12.7087	0.964068	5.11051	1.9801	-2.71343	0.0689523
ate1	ENSDARG00000103813	101886126	31.8502	21.5069	13.6863	13.497	53.1493	37.6219	0.63484	0.622649
atf1	ENSDARG00000109865	325609	508.667	654.005	747.859	1118.32	981.218	860.354	0.631678	0.1614
atf2	ENSDARG00000023903	100006516	156.441	77.2293	207.25	68.4488	79.724	82.1742	-0.936924	0.151066
atf3	ENSDARG00000007823	393939	6116.18	8629.16	541.587	23616.8	25124.3	14997.3	2.05987	0.145746
atf4a	ENSDARG00000111939	406514	3583.15	4939.75	1453.68	4586.07	8455.85	7857.04	1.0668	0.0644675
atf4b	ENSDARG00000114163	556410	9491.36	12240.4	4633.8	22305.6	38907.3	23154.3	1.67803	0.000508248
atf5a	ENSDARG00000068096	566223	143.326	37.1483	10.7535	8.67661	25.5526	15.8408	-1.93582	0.0831989
atf5b	ENSDARG00000077785	567253	271.664	305.985	436.007	877.302	1398.24	962.329	1.67553	5.41508e-05
atf6	ENSDARG00000012656	558071	109.602	137.84	67.454	53.9878	54.1714	95.0448	-0.631949	0.415148
atf6b		777612	340.985	373.438	343.135	531.202	227.929	270.284	-0.0385871	0.968343
atf7a	ENSDARG00000011298	566279	33.7238	55.7224	37.1486	108.94	58.2598	92.0747	1.03532	0.137823
atf7b	ENSDARG00000115171	567018	283.842	149.571	229.735	215.951	321.962	344.538	0.41181	0.539845
atf7ip	ENSDARG00000069619	558977	1274.95	1252.29	1048.96	1049.87	1613.9	1446.46	0.200723	0.746187
atf7ip2	ENSDARG00000089698	100005485	150.82	144.683	298.166	184.137	206.465	191.08	-0.0293017	0.977578
atg10	ENSDARG00000104846	641330	50.5856	87.9828	110.468	141.718	130.829	127.717	0.685314	0.302655
atg101	ENSDARG00000043287	567680	222.015	255.15	415.477	364.418	354.669	309.886	0.205231	0.779656
atg12	ENSDARG00000113990	570965	34.6605	66.4759	60.6108	107.976	14.3094	30.6916	-0.0786105	0.963434
atg13	ENSDARG00000036040	393405	544.264	463.376	733.195	402.98	989.395	758.379	0.304941	0.681988
atg16l1	ENSDARG00000099430	550552	7.49417	1.95517	0.977594	11.5688	4.08841	0.99005	0.673115	1
atg16l2	ENSDARG00000043238	100034627	17.7987	14.6638	12.7087	42.419	8.17682	14.8508	0.536476	0.738878
atg2b	ENSDARG00000097650	100000277	28.1031	22.4845	10.7535	13.497	2.0442	28.7115	-0.470359	0.801194
atg3	ENSDARG00000009350	336632	195.785	230.71	334.337	339.352	329.117	351.468	0.423038	0.472625
atg4a	ENSDARG00000014531	554140	14.9883	14.6638	21.5071	52.0597	36.7957	45.5423	1.39437	0.0899178
atg4b	ENSDARG00000052104	448859	192.975	195.517	221.914	379.843	342.404	215.831	0.620031	0.253158
atg4c	ENSDARG00000044373	415193	178.923	184.764	184.765	171.604	436.438	254.443	0.65278	0.296536
atg4da	ENSDARG00000043548	795933	227.635	168.145	213.115	172.568	152.293	105.935	-0.499195	0.419282
atg4db	ENSDARG00000088145	100329304	10.3045	1.95517	0.977594	12.5329	2.0442	0	0.139101	1
atg5	ENSDARG00000023396	494180	203.279	326.514	356.822	443.471	378.178	355.428	0.409114	0.49727
atg7	ENSDARG00000102893	100333016	60.8901	90.9156	75.2747	89.6583	106.299	77.2239	0.266799	0.756441
atg9a	ENSDARG00000044551	100009663	219.204	188.674	339.225	388.519	258.592	297.015	0.337938	0.623929
atg9b	ENSDARG00000055292	791223	563.936	601.216	591.444	908.152	961.798	787.09	0.597039	0.156288
atic	ENSDARG00000016706	140622	80.5623	157.391	81.1403	22.1736	121.63	136.627	-0.186748	0.887809
atl1	ENSDARG00000060481	571909	204.216	123.176	256.13	36.6346	9.19892	21.7811	-3.10607	1.03477e-06
atl2	ENSDARG00000113487	323665	275.411	467.286	408.634	496.495	794.173	559.379	0.684293	0.184892
atl3	ENSDARG00000004270	449995	537.707	920.887	618.817	1257.14	1744.73	1508.84	1.11861	0.00753434
atm	ENSDARG00000002385	403064	173.303	258.083	212.138	192.814	259.614	350.478	0.319296	0.650289
atmin	ENSDARG00000068601	571606	123.654	57.6776	69.4092	63.6285	78.7019	88.1145	-0.122663	0.909781
atn1	ENSDARG00000092067	321707	479.627	442.847	529.856	388.519	310.719	395.03	-0.408282	0.431155
atoh1a	ENSDARG00000055294	30303	49.6489	53.7673	89.9386	13.497	2.0442	2.97015	-3.37607	0.000198603
atoh1b	ENSDARG00000099564	493915	43.0915	42.0362	31.283	10.6047	4.08841	3.9602	-2.63717	0.004952
atoh1c	ENSDARG00000039602	100498672	49.6489	43.0138	70.3868	17.3532	38.8399	13.8607	-1.22068	0.161143
atoh7	ENSDARG00000069552	58216	107.729	70.3862	46.9245	3.85627	25.5526	5.9403	-2.67633	0.0027282
atoh8	ENSDARG00000110248	561606	358.783	480.973	482.931	1025.77	1819.34	1078.16	1.5686	0.000173333
atox1	ENSDARG00000087693	558347	133.021	217.024	353.889	341.28	467.101	331.667	0.695768	0.261617
atp10a	ENSDARG00000110280	567172	350.352	554.292	396.903	1092.29	1219.37	1197.96	1.43118	0.00017758
atp10b	ENSDARG00000076230	563932	33.7238	33.2379	69.4092	35.6705	19.4199	54.4528	-0.314937	0.801299
atp10d	ENSDARG00000078887	571658	295.083	255.15	318.696	268.011	439.504	386.12	0.331606	0.594155
atp11a	ENSDARG00000115219	562925	166.745	171.078	101.67	102.191	33.7294	75.2438	-1.05649	0.120219
atp11c	ENSDARG00000116165	368385	444.03	497.592	604.153	446.364	689.919	632.642	0.19449	0.770109
atp13a1	ENSDARG00000029931	334466	305.387	372.461	290.345	301.753	347.515	258.403	-0.0931785	0.901611
atp13a2	ENSDARG00000117108	568666	90.8668	132.952	93.849	79.0536	101.188	110.886	-0.125899	0.892651
atp13a3	ENSDARG00000076622	572029	50.5856	63.5431	58.6556	55.916	28.6189	38.612	-0.487256	0.600871
atp1a1a.1	ENSDARG00000002791	64612	3441.7	4571.2	3820.44	9690.81	17321.6	11705.4	1.71014	1.01273e-05
atp1a1a.2	ENSDARG00000007739	64613	164.872	1262.06	1856.45	134.97	15.3315	83.1642	-3.81358	0.0150273
atp1a1a.3	ENSDARG00000039131	64614	50.5856	122.198	292.301	19.2814	32.7073	11.8806	-2.86541	0.00022216
atp1a1a.4	ENSDARG00000001870	64615	224.825	802.599	804.56	38.5627	25.5526	34.6518	-4.2122	1.3505e-12
atp1a1a.5	ENSDARG00000040252	245703	16.8619	22.4845	24.4398	27.958	16.3536	7.9204	-0.286698	0.861596
atp1a1b	ENSDARG00000115121	64616	4710.09	3753.93	8351.59	1678.44	1425.83	1468.24	-1.87872	9.02926e-06
atp1a2a	ENSDARG00000111818	64609	27.1664	37.1483	30.3054	12.5329	14.3094	5.9403	-1.52962	0.12855
atp1a3a	ENSDARG00000018259	64610	2919.92	979.542	1828.1	195.706	201.354	146.527	-3.39741	3.75098e-12
atp1a3b	ENSDARG00000104139	64611	1126	704.84	468.268	53.0237	79.724	172.269	-2.91435	2.80641e-07
atp1b1a	ENSDARG00000013144	64267	2544.27	4223.17	3532.05	6959.61	8516.16	9008.47	1.2493	0.00111134
atp1b1b	ENSDARG00000076833	64273	459.955	1873.06	2170.26	159.071	18.3978	80.1941	-4.12641	8.41714e-08
atp1b2a	ENSDARG00000099203	64269	6776.6	3373.65	4797.05	1035.41	1052.77	1254.39	-2.16087	5.54236e-08
atp1b2b	ENSDARG00000113354	114457	1361.13	686.266	197.474	92.5505	94.0334	262.363	-2.32207	0.00120716
atp1b3a	ENSDARG00000015790	30468	1252.46	702.885	698.002	475.286	1335.89	836.593	-0.00323036	0.997789
atp1b3b	ENSDARG00000042837	64272	683.843	421.34	936.535	203.418	297.432	197.02	-1.54898	0.000967113
atp1b4	ENSDARG00000053262	100037383	2198.6	1171.15	2103.78	819.458	4631.15	2391.96	0.518799	0.54932
atp2a1	ENSDARG00000020574	260440	672.602	858.321	1145.74	391.412	1698.73	740.558	0.0806302	0.943344
atp2a1l	ENSDARG00000035458	494489	73.0681	125.131	262.973	122.437	296.41	118.806	0.221313	0.843606
atp2a2a	ENSDARG00000029439	393940	110.539	167.167	173.034	153.287	217.708	199.99	0.341247	0.627459
atp2a2b	ENSDARG00000005122	568265	792.508	979.542	1022.56	1080.72	1504.53	1271.22	0.46463	0.332798
atp2a3	ENSDARG00000060978	568671	339.111	453.6	744.927	685.452	399.642	479.184	0.0250274	0.979622
atp2b1a	ENSDARG00000012684	378746	1082.91	1000.07	1230.79	480.106	583.62	507.896	-1.07629	0.00350028
atp2b1b	ENSDARG00000007788	561190	1292.74	890.581	189.653	181.245	93.0113	236.622	-2.21551	0.00117659
atp2b2	ENSDARG00000063433	557430	458.081	310.873	1159.43	157.143	62.3482	126.726	-2.47705	4.71987e-05
atp2b3a	ENSDARG00000043474	436745	1444.5	706.795	1962.03	269.939	205.443	292.065	-2.42205	3.27701e-07
atp2b3b	ENSDARG00000112865	558525	1075.41	688.221	2249.44	122.437	85.8566	65.3433	-3.87398	1.63544e-12
atp2b4	ENSDARG00000044902	768304	247.308	303.052	309.897	481.07	382.266	342.557	0.487478	0.350861
atp2c1	ENSDARG00000060197	559574	437.472	489.771	510.304	609.291	622.46	633.632	0.375911	0.448103
atp5a1	ENSDARG00000010149	553755	5715.24	8407.25	8360.38	6123.76	8147.18	7745.16	-0.0302649	0.968343
atp5b	ENSDARG00000070083	554135	6385.97	8299.71	9755.41	5577.13	8341.38	7516.46	-0.189344	0.766239
atp5c1	ENSDARG00000045514	336957	1786.42	3271.98	4423.61	2127.7	3218.6	3062.23	-0.173333	0.825416
atp5d	ENSDARG00000019404	335709	858.082	1805.6	2493.84	1566.61	1318.51	1259.34	-0.315426	0.669067
atp5e	ENSDARG00000095897	798291	607.028	1542.63	1883.82	1761.35	611.217	779.17	-0.355741	0.69573
atp5f1	ENSDARG00000011553	449787	1855.74	3303.27	4153.8	3937.25	4040.37	3418.64	0.291301	0.657798
atp5g1	ENSDARG00000056008	406301	1629.04	3945.54	6018.07	1774.85	1817.3	2289.99	-0.978776	0.0901143
atp5g3a	ENSDARG00000017775	394151	1186.89	1897.5	2444.96	1323.67	1903.15	1909.81	-0.106275	0.893864
atp5g3b	ENSDARG00000009447	81541	2953.64	6275.13	7023.04	6592.3	4205.95	5333.4	-0.0106779	0.990324
atp5h	ENSDARG00000098355	393675	1308.67	2782.21	4002.27	1930.06	1952.22	2291.97	-0.390405	0.578814
atp5ia	ENSDARG00000078113	559659	280.095	622.723	657.921	661.351	343.426	420.771	-0.130418	0.887469
atp5ib	ENSDARG00000117205	767750	576.114	1300.19	1986.47	1849.08	992.461	1278.16	0.0930081	0.927944
atp5j	ENSDARG00000014313	406599	796.255	1711.75	2383.37	1335.23	943.4	1138.56	-0.517342	0.430819
atp5j2	ENSDARG00000037867	402883	363.467	741.988	1104.68	670.027	405.775	487.105	-0.499695	0.47927
atp5l	ENSDARG00000011841	326977	941.455	2279.73	3314.04	2591.42	1254.12	1570.22	-0.271001	0.760037
atp5o	ENSDARG00000001788	335191	1925.06	4435.31	5575.22	4368.19	3622.33	3813.67	-0.0159404	0.986707
atp5s	ENSDARG00000012072	393187	113.349	104.602	154.46	155.215	148.205	127.717	0.211408	0.786833
atp6ap1a	ENSDARG00000041417	100004566	1288.06	581.664	916.006	92.5505	81.7682	69.3035	-3.51524	1.15143e-14
atp6ap1b	ENSDARG00000037153	195824	287.589	362.685	428.186	374.058	622.46	592.05	0.558743	0.301783
atp6ap1la	ENSDARG00000091509	100000415	104.918	36.1707	25.4174	27.958	1.0221	8.91045	-2.13224	0.0722759
atp6ap1lb	ENSDARG00000090963	561786	744.733	230.71	186.72	83.8739	107.321	83.1642	-2.08315	0.000760637
atp6ap2	ENSDARG00000008735	406296	2266.99	1693.18	2193.72	1035.41	1176.44	1077.17	-0.903879	0.0162983
atp6v0a1a	ENSDARG00000020847	324307	903.047	571.888	349.979	274.759	580.554	512.846	-0.415862	0.582368
atp6v0a1b	ENSDARG00000015174	553691	2020.62	810.419	2384.35	141.718	36.7957	84.1543	-4.31042	1.63544e-12
atp6v0a2a	ENSDARG00000035538	561469	289.462	126.109	207.25	49.1675	62.3482	38.612	-2.0534	0.000147871
atp6v0a2b	ENSDARG00000113695	561117	126.464	165.212	129.042	92.5505	192.155	153.458	0.0582093	0.955088
atp6v0b	ENSDARG00000031681	321724	1374.24	997.138	1366.68	532.166	734.892	632.642	-0.976634	0.0149078
atp6v0ca	ENSDARG00000057853	192336	2650.13	3379.52	3859.54	2501.76	2091.22	2643.43	-0.450544	0.343064
atp6v0cb	ENSDARG00000036577	325402	4916.17	2741.15	4462.72	789.572	645.969	605.911	-2.56969	4.38275e-11
atp6v0d1	ENSDARG00000115876	322811	690.4	529.852	1127.17	389.484	704.228	528.687	-0.533056	0.388848
atp6v0e1	ENSDARG00000101794	450017	96.4874	271.769	165.213	274.759	183.978	270.284	0.451076	0.555448
atp6v1aa	ENSDARG00000113437	394110	625.763	569.933	1248.39	406.837	400.664	460.373	-0.94682	0.0595366
atp6v1ab	ENSDARG00000112815	337583	172.366	169.122	398.858	56.88	103.232	112.866	-1.43972	0.0158524
atp6v1b2	ENSDARG00000043465	359840	427.168	265.904	792.829	114.724	307.653	139.597	-1.40319	0.0245555
atp6v1ba	ENSDARG00000111525	359839	996.724	685.288	885.7	411.657	813.593	803.921	-0.339753	0.606588
atp6v1c1a	ENSDARG00000023967	368907	419.673	281.545	476.088	201.49	409.863	254.443	-0.443737	0.506092
atp6v1c1b	ENSDARG00000112507	449655	134.895	189.652	344.113	80.0177	53.1493	99.9951	-1.51929	0.00889025
atp6v1c2	ENSDARG00000070440	100538220	2.81031	3.91035	0	13.497	0	1.9801	1.20543	1
atp6v1d	ENSDARG00000011175	393935	358.783	361.707	571.892	305.61	223.84	250.483	-0.72835	0.147015
atp6v1e1b	ENSDARG00000030694	192335	781.267	941.416	2091.07	496.495	420.084	479.184	-1.45006	0.00337271
atp6v1f	ENSDARG00000045543	436799	430.915	486.838	1061.67	404.909	556.024	373.249	-0.569129	0.381369
atp6v1g1	ENSDARG00000110951	335025	1072.6	809.442	1545.58	353.813	834.035	676.204	-0.878902	0.10939
atp6v1h	ENSDARG00000006370	286779	830.916	637.386	1214.17	394.304	562.156	452.453	-0.92908	0.0465103
atp7a	ENSDARG00000003699	564924	67.4475	42.0362	38.1262	70.377	7.15472	30.6916	-0.446381	0.750541
atp7b	ENSDARG00000058145	556499	29.0399	31.2828	27.3726	28.922	7.15472	15.8408	-0.753689	0.548678
atp8a1	ENSDARG00000063001	767630	113.349	57.6776	51.8125	4.82034	5.11051	37.6219	-2.22852	0.0243246
atp8a2	ENSDARG00000110095	100330943	92.7403	87.0052	67.454	33.7424	14.3094	34.6518	-1.57812	0.0209279
atp8b1	ENSDARG00000060980	100148342	27.1664	37.1483	55.7229	18.3173	0	10.8906	-2.03432	0.0991797
atp8b2	ENSDARG00000115821	323754	81.4991	101.669	249.286	44.3471	22.4862	41.5821	-1.99461	0.00293199
atp8b3	ENSDARG00000042285	566530	75.8785	35.1931	86.0283	35.6705	25.5526	10.8906	-1.45003	0.0863254
atp8b4	ENSDARG00000079453	559291	28.1031	8.79828	6.84316	18.3173	5.11051	15.8408	-0.155993	0.944818
atp8b5a	ENSDARG00000062040	100330945	73.0681	100.691	33.2382	138.826	196.244	176.229	1.30427	0.0327194
atp8b5b	ENSDARG00000104450	563450	16.8619	12.7086	46.9245	28.922	8.17682	14.8508	-0.555744	0.724952
atp9a	ENSDARG00000115869	101886226	42.1547	43.0138	28.3502	27.958	15.3315	25.7413	-0.716637	0.487424
atp9b	ENSDARG00000062521	568160	90.8668	63.5431	49.8573	64.5926	55.1935	40.5921	-0.349308	0.715445
atpaf1	ENSDARG00000042799	550606	216.394	272.747	406.679	193.778	379.2	352.458	0.0468532	0.962824
atpaf2	ENSDARG00000115757	560253	171.429	209.204	221.914	116.652	203.398	185.139	-0.254501	0.733847
atpif1a	ENSDARG00000067975	100037369	207.026	566.023	665.742	540.842	242.238	413.841	-0.265205	0.77269
atpif1b	ENSDARG00000112469	558368	241.687	439.914	813.358	449.256	215.664	339.587	-0.573295	0.448103
atpv0e2	ENSDARG00000059057	553767	992.977	604.149	837.798	150.395	166.603	158.408	-2.35682	1.74589e-09
atr	ENSDARG00000079625	567770	127.401	119.266	147.617	107.976	203.398	206.921	0.39422	0.586107
atraid	ENSDARG00000043388	553468	175.176	102.647	229.735	226.556	198.288	197.02	0.293069	0.705547
atrip	ENSDARG00000063076	558534	102.108	143.705	92.8714	113.76	62.3482	61.3831	-0.511233	0.509932
atrn	ENSDARG00000110632	794975	102.108	64.5207	72.342	72.3051	48.0388	78.214	-0.267208	0.774215
atrnl1a	ENSDARG00000077188	792417	190.165	131.974	126.11	279.58	388.399	209.891	0.969216	0.062662
atrnl1b	ENSDARG00000006420	569196	949.886	842.68	1046.03	905.26	1295	938.568	0.144981	0.823646
atrx	ENSDARG00000112921	323299	3977.53	5112.78	4857.66	3797.46	5484.6	5245.29	0.0587115	0.935446
atxn10	ENSDARG00000008439	100034473	78.6888	84.0725	60.6108	57.8441	68.4809	63.3632	-0.236173	0.795136
atxn1a	ENSDARG00000115198	557340	261.359	379.304	297.189	344.172	206.465	342.557	-0.0700501	0.935663
atxn1b	ENSDARG00000060862	565841	259.486	236.576	271.771	175.46	157.404	185.139	-0.567736	0.264886
atxn1l	ENSDARG00000086977	793927	78.6888	111.445	55.7229	102.191	26.5747	67.3234	-0.325169	0.768697
atxn2	ENSDARG00000115860	569210	228.572	296.209	254.174	263.191	456.88	300.975	0.390279	0.531903
atxn2l	ENSDARG00000112336	324525	584.545	768.383	726.352	901.404	710.361	632.642	0.11037	0.875242
atxn3	ENSDARG00000099274	394079	116.16	168.145	117.311	198.598	120.608	106.925	0.0860364	0.930615
atxn7	ENSDARG00000074804	100001490	428.104	442.847	405.702	444.435	593.841	595.02	0.355324	0.509549
atxn7l1	ENSDARG00000089860	100536590	66.5107	49.8569	36.171	90.6224	47.0167	61.3831	0.383861	0.696123
atxn7l2a	ENSDARG00000116622	692316	211.71	286.433	126.11	190.885	240.194	219.791	0.0601027	0.951379
atxn7l2b	ENSDARG00000056268	436928	267.917	241.464	247.331	286.328	442.57	272.264	0.403583	0.500974
atxn7l3	ENSDARG00000029331	368510	195.785	169.122	206.272	187.993	169.669	133.657	-0.217233	0.763696
auh	ENSDARG00000042975	445182	218.268	244.397	307.942	103.155	314.807	296.025	-0.110365	0.913462
aunip		103909277	65.574	85.05	81.1403	26.0298	78.7019	83.1642	-0.303409	0.774251
aup1	ENSDARG00000092609	324654	482.437	545.493	460.447	662.315	884.118	754.418	0.628368	0.150632
aurka	ENSDARG00000012485	445246	280.095	403.743	271.771	217.879	261.658	257.413	-0.374878	0.531903
aurkaip1	ENSDARG00000074985	100126015	189.228	338.245	502.483	212.095	230.995	236.622	-0.599412	0.344787
aurkb	ENSDARG00000037640	791894	365.341	402.766	377.351	233.304	531.493	477.204	0.11654	0.890844
auts2a	ENSDARG00000116439	368890	1643.1	2073.46	2151.68	1852.94	1754.95	1798.92	-0.118118	0.850325
auts2b	ENSDARG00000020946	100150849	615.459	479.995	578.736	202.454	444.614	251.473	-0.898202	0.0802691
aven	ENSDARG00000002894	692323	210.774	223.867	335.315	213.059	325.029	319.786	0.155943	0.843081
avil	ENSDARG00000059342	678618	53.396	29.3276	24.4398	23.1376	12.2652	15.8408	-1.06374	0.301769
avl9	ENSDARG00000055538	751682	370.961	240.486	243.421	239.089	501.852	302.955	0.287753	0.706207
avp	ENSDARG00000058567	352922	3.74708	3.91035	77.2299	0.964068	0	0	-6.3147	0.00174648
avpr1aa	ENSDARG00000077083	571591	14.9883	5.86552	3.91038	15.4251	7.15472	13.8607	0.555786	0.780042
avpr1ab	ENSDARG00000045788	555939	23.4193	25.4173	3.91038	48.2034	91.9892	133.657	2.37491	0.00425772
avpr2aa	ENSDARG00000007436	100007585	66.5107	57.6776	58.6556	246.801	251.437	230.682	1.99485	3.49162e-06
avpr2ab	ENSDARG00000029219	100151502	43.0915	37.1483	12.7087	32.7783	15.3315	14.8508	-0.561273	0.681769
avpr2l	ENSDARG00000076690	100004053	11.2413	11.731	2.93278	4.82034	15.3315	3.9602	-0.106854	0.968447
axdnd1	ENSDARG00000062355	557839	22.4825	36.1707	41.0589	15.4251	2.0442	7.9204	-1.96816	0.0755982
axin1	ENSDARG00000102964	57931	1081.03	1295.3	1507.45	1340.05	2220.01	1701.9	0.438117	0.40595
axin2	ENSDARG00000100149	58080	648.246	762.518	796.739	1070.12	1891.91	1548.44	1.03084	0.0133222
axl	ENSDARG00000112045	100330721	34.6605	37.1483	18.5743	50.1315	29.641	37.6219	0.377591	0.747323
azi2	ENSDARG00000102419	406377	61.8269	37.1483	26.395	29.8861	64.3924	39.602	0.092866	0.948519
azin1a	ENSDARG00000052789	550230	60.8901	122.198	56.7005	43.3831	57.2377	71.2836	-0.480118	0.596684
azin1b	ENSDARG00000115647	317764	1751.76	1942.46	2441.05	3355.92	4857.03	3896.84	0.980975	0.0120212
b2m	ENSDARG00000053136	30400	84.3094	146.638	80.1627	144.61	435.416	292.065	1.48696	0.0116234
b2ml	ENSDARG00000015887	791742	1558.79	3358.01	2896.61	7612.28	6599.71	5916.54	1.36526	0.00137181
b3galnt2	ENSDARG00000046133	553716	81.4991	130.019	81.1403	163.892	202.376	185.139	0.914044	0.0893248
b3galt1a	ENSDARG00000079700	559521	118.033	100.691	126.11	77.1254	124.696	77.2239	-0.306045	0.705926
b3galt1b		571003	32.787	17.5966	25.4174	38.5627	4.08841	7.9204	-0.58136	0.730596
b3galt2	ENSDARG00000114032	404633	808.433	570.911	423.298	702.806	1367.57	776.2	0.658915	0.252471
b3galt4	ENSDARG00000076218	101886595	32.787	10.7535	5.86556	5.78441	1.0221	14.8508	-1.18963	0.52678
b3galt6	ENSDARG00000038414	572324	14.0516	17.5966	6.84316	0	4.08841	5.9403	-1.94457	0.303661
b3gat1a	ENSDARG00000112270	548607	477.753	227.778	437.962	30.8502	40.8841	36.6319	-3.40033	6.76415e-12
b3gat1b	ENSDARG00000113928	100332644	44.0282	10.7535	30.3054	0	1.0221	14.8508	-2.42287	0.129088
b3gat2	ENSDARG00000030733	445060	400.001	337.267	650.1	149.431	94.0334	154.448	-1.80138	0.000133835
b3gat3	ENSDARG00000001939	192334	35.5973	28.35	30.3054	23.1376	39.862	18.811	-0.205705	0.881176
b3glcta	ENSDARG00000073917	799443	117.096	151.526	179.877	268.975	208.509	235.632	0.669472	0.208768
b3glctb	ENSDARG00000110421	564156	19.6722	10.7535	16.6191	16.3892	15.3315	7.9204	-0.247611	0.892427
b3gnt2a	ENSDARG00000052376	405766	29.0399	31.2828	15.6415	12.5329	5.11051	6.93035	-1.62554	0.159745
b3gnt2b	ENSDARG00000091902	793362	211.71	189.652	187.698	456.968	697.074	630.662	1.59899	5.15297e-05
b3gnt2l	ENSDARG00000068219	797513	113.349	194.54	408.634	77.1254	103.232	71.2836	-1.50969	0.0151561
b3gnt3	ENSDARG00000058100	561172	51.5224	55.7224	36.171	18.3173	50.083	8.91045	-0.893592	0.419851
b3gnt5a	ENSDARG00000018971	336526	272.6	453.6	208.228	680.632	757.378	540.568	1.08236	0.0265414
b3gnt5b	ENSDARG00000004396	791470	29.0399	43.9914	62.566	51.0956	47.0167	37.6219	0.00229	0.998505
b3gnt7	ENSDARG00000038489	286748	29.0399	19.5517	21.5071	24.1017	61.3261	85.1443	1.28167	0.144593
b3gnt7l	ENSDARG00000053133	407623	121.78	125.131	145.662	222.7	198.288	199	0.659476	0.199985
b3gnt9	ENSDARG00000041616	100034499	43.0915	11.731	10.7535	3.85627	18.3978	29.7015	-0.338441	0.861505
b3gntl1	ENSDARG00000043431	619261	11.2413	25.4173	3.91038	13.497	19.4199	21.7811	0.431124	0.808492
b4galnt1a	ENSDARG00000117038	558684	53.396	37.1483	48.8797	44.3471	38.8399	29.7015	-0.304666	0.774948
b4galnt1b	ENSDARG00000114582	793635	28.1031	21.5069	25.4174	1.92814	1.0221	14.8508	-2.07469	0.136945
b4galnt2.1	ENSDARG00000094579	558078	18.7354	15.6414	13.6863	8.67661	9.19892	6.93035	-0.954889	0.517496
b4galnt2.2	ENSDARG00000070605	557782	3.74708	8.79828	0.977594	0	5.11051	3.9602	-0.579424	1
b4galnt3a	ENSDARG00000078749	561505	37.4708	22.4845	69.4092	19.2814	1.0221	26.7314	-1.45747	0.250545
b4galnt3b	ENSDARG00000058939	553524	118.033	70.3862	188.676	30.8502	23.5084	77.2239	-1.51859	0.0415685
b4galnt4a	ENSDARG00000112006	565184	184.544	101.669	80.1627	39.5268	19.4199	26.7314	-2.09516	0.000997084
b4galnt4b	ENSDARG00000076701	559305	134.895	67.4535	103.625	57.8441	33.7294	34.6518	-1.27678	0.0515212
b4galt1		550425	15.9251	49.8569	77.2299	94.4787	104.254	107.916	1.10159	0.164648
b4galt1l	ENSDARG00000104404	768123	34.6605	56.7	42.0365	56.88	62.3482	74.2538	0.536928	0.526035
b4galt2	ENSDARG00000077994	100148828	380.329	241.464	295.233	93.5146	149.227	91.0846	-1.45859	0.00210277
b4galt3	ENSDARG00000112697	561756	95.5507	104.602	95.8042	67.4848	132.873	138.607	0.195301	0.830005
b4galt4	ENSDARG00000104042	492760	26.2296	32.2604	30.3054	27.958	47.0167	26.7314	0.195202	0.88201
b4galt5	ENSDARG00000037815	724080	18.7354	25.4173	7.82075	26.0298	23.5084	12.8707	0.263895	0.876162
b4galt6	ENSDARG00000010301	393912	673.538	920.887	368.553	765.47	898.428	1013.81	0.447928	0.483681
b4galt7	ENSDARG00000021899	445022	166.745	178.898	181.832	203.418	379.2	255.433	0.667674	0.224624
b4gat1	ENSDARG00000111962	101669768	22.4825	28.35	12.7087	6.74848	2.0442	3.9602	-2.31211	0.0696551
b9d1	ENSDARG00000011727	554150	67.4475	46.9242	41.0589	99.299	55.1935	64.3533	0.493656	0.573614
b9d2	ENSDARG00000017385	436667	81.4991	77.2293	154.46	124.365	146.161	79.204	0.159305	0.875242
baalc		101884762	6.5574	5.86552	0.977594	9.64068	0	1.9801	-0.202234	1
babam1	ENSDARG00000077526	445296	273.537	261.993	498.573	488.783	468.123	390.08	0.381482	0.555876
babam2	ENSDARG00000038863	550474	251.991	348.998	445.783	422.262	393.509	431.662	0.253222	0.704038
bace1	ENSDARG00000101716	403005	245.434	146.638	412.545	95.4427	67.4587	89.1045	-1.67442	0.00227422
bace2	ENSDARG00000044781	449818	198.595	355.842	221.914	570.728	682.764	588.09	1.24631	0.00407189
bach1a	ENSDARG00000062553	678555	19.6722	5.86552	8.79835	27.958	15.3315	16.8309	0.806645	0.586778
bach1b	ENSDARG00000002196	553688	43.0915	43.0138	58.6556	131.113	77.6798	49.5025	0.836067	0.284094
bach2a	ENSDARG00000036569	557210	61.8269	57.6776	28.3502	20.2454	12.2652	32.6717	-1.18111	0.199505
bach2b	ENSDARG00000004074	555350	185.481	111.445	127.087	46.2753	42.9283	69.3035	-1.41971	0.0114135
bada	ENSDARG00000087993	564921	488.058	399.833	218.003	1267.75	1352.24	922.727	1.67947	0.000175111
badb	ENSDARG00000114609	58100	116.16	206.271	197.474	160.999	240.194	155.438	0.0985099	0.914885
bag1	ENSDARG00000020895	558108	212.647	219.957	264.928	223.664	336.272	231.672	0.182352	0.801927
bag2	ENSDARG00000035005	393975	28.1031	123.176	62.566	390.448	139.006	177.219	1.7255	0.014762
bag3	ENSDARG00000039486	445139	247.308	453.6	61.5884	2721.56	1683.4	2834.51	3.24711	3.64271e-07
bag4	ENSDARG00000043179	100001980	146.136	177.921	156.415	55.916	145.139	171.279	-0.36828	0.670245
bag5	ENSDARG00000017316	569580	63.7004	43.0138	39.1038	70.377	23.5084	34.6518	-0.181099	0.889511
bag6	ENSDARG00000075892	83910	446.84	584.597	656.943	684.488	893.317	717.787	0.443254	0.390474
bag6l	ENSDARG00000077531	751663	110.539	93.8483	80.1627	81.9458	81.7682	63.3632	-0.32578	0.688114
bahcc1b	ENSDARG00000080009	794333	1663.71	1849.59	1807.57	1480.81	2221.03	1651.4	0.00871259	0.990324
bahd1	ENSDARG00000112121	564712	507.73	569.933	450.671	1281.25	897.406	906.886	1.01363	0.0114596
baiap2a	ENSDARG00000062799	678518	336.301	303.052	333.36	235.233	291.299	279.194	-0.271889	0.653292
baiap2b		100537012	66.5107	80.1621	92.8714	34.7065	21.4641	9.9005	-1.85666	0.0101565
baiap2l1a	ENSDARG00000029305	387261	45.9018	46.9242	64.5212	28.922	12.2652	53.4627	-0.732187	0.4841
baiap2l1b	ENSDARG00000031119	550528	26.2296	29.3276	26.395	8.67661	9.19892	2.97015	-1.97546	0.0680923
baiap2l2a	ENSDARG00000016483	394210	34.6605	18.5741	15.6415	13.497	7.15472	5.9403	-1.37194	0.271358
baiap2l2b	ENSDARG00000060933	564798	26.2296	26.3948	41.0589	20.2454	12.2652	22.7712	-0.759616	0.499477
baiap3	ENSDARG00000079264	564728	46.8386	25.4173	96.7818	20.2454	5.11051	9.9005	-2.25763	0.0162829
bambia	ENSDARG00000055381	83496	347.542	415.474	290.345	1168.45	1357.35	1100.94	1.78365	1.09526e-06
bambib	ENSDARG00000099677	431736	225.762	439.914	248.309	766.434	643.924	877.185	1.32376	0.00325389
banf1	ENSDARG00000037009	334717	1301.18	2807.63	3018.81	1890.54	3279.93	3237.47	0.238344	0.758448
banp	ENSDARG00000017562	553659	207.963	171.078	178.9	157.143	322.984	207.911	0.301866	0.685233
bap1	ENSDARG00000063051	558885	248.244	223.867	241.466	187.993	189.089	143.557	-0.454847	0.420834
bard1	ENSDARG00000076733	100147913	60.8901	60.6104	45.9469	33.7424	28.6189	59.403	-0.459492	0.641169
barhl1a	ENSDARG00000112355	550407	224.825	81.1397	188.676	49.1675	32.7073	30.6916	-2.13504	0.000404848
barhl1b	ENSDARG00000113145	553186	33.7238	15.6414	12.7087	1.92814	0	4.95025	-3.16949	0.032064
barhl2	ENSDARG00000115723	100001699	517.098	150.548	676.495	26.0298	15.3315	18.811	-4.47987	4.81918e-12
barx1	ENSDARG00000007407	553644	356.91	477.062	381.262	375.987	640.858	454.433	0.275725	0.674575
barx2	ENSDARG00000041098	100002200	20.609	28.35	19.5519	27.958	16.3536	7.9204	-0.390015	0.799193
basp1	ENSDARG00000110677	569631	86.1829	31.2828	109.491	41.4549	15.3315	16.8309	-1.62252	0.0562056
batf	ENSDARG00000011818	564589	7.49417	8.79828	11.7311	6.74848	2.0442	9.9005	-0.581604	1
batf3	ENSDARG00000042577	751677	9.36771	17.5966	28.3502	14.461	5.11051	5.9403	-1.11277	0.459543
baxa	ENSDARG00000020623	58081	317.565	435.026	378.329	612.183	616.328	432.652	0.554788	0.267114
baxb	ENSDARG00000030881	503609	105.855	168.145	151.527	376.951	332.183	293.055	1.23625	0.00543555
baz1a	ENSDARG00000099745	334173	1205.62	1925.85	1090.02	1150.13	1182.57	1281.13	-0.2242	0.728913
baz1b	ENSDARG00000114866	571727	1785.49	2414.64	1373.52	1054.69	1257.19	1393.99	-0.588825	0.225783
baz2a	ENSDARG00000102974	450079	1619.68	1845.68	1979.63	1339.09	1814.23	1792.98	-0.138596	0.824925
baz2ba	ENSDARG00000057782	561095	2515.23	2838.91	2351.11	3284.58	2773.99	2463.25	0.145333	0.810217
bbc3	ENSDARG00000069282	751763	147.073	169.122	174.012	213.059	249.393	159.398	0.34316	0.603643
bbip1	ENSDARG00000116522	795943	236.066	267.859	378.329	467.573	381.244	297.015	0.377347	0.548828
bbox1	ENSDARG00000113482	572649	215.457	234.621	175.967	250.658	657.212	419.781	1.08427	0.0421137
bbs1	ENSDARG00000114301	568986	108.665	93.8483	67.454	87.7302	60.304	66.3334	-0.332515	0.69842
bbs10	ENSDARG00000110925	100034535	49.6489	19.5517	41.0589	19.2814	51.1051	25.7413	-0.199929	0.889719
bbs12	ENSDARG00000016112	570583	56.2063	33.2379	43.9917	25.0658	45.9946	41.5821	-0.245802	0.833186
bbs2	ENSDARG00000110124	259187	224.825	203.338	225.824	163.892	210.553	193.06	-0.204869	0.766238
bbs4	ENSDARG00000063522	768303	78.6888	42.0362	46.9245	47.2393	28.6189	49.5025	-0.419329	0.681619
bbs5	ENSDARG00000039827	393269	139.579	118.288	114.378	106.047	111.409	69.3035	-0.376671	0.612733
bbs7	ENSDARG00000059911	557491	205.153	172.055	150.549	114.724	189.089	119.796	-0.317781	0.666307
bbs9	ENSDARG00000113486	100333716	147.073	129.041	53.7677	53.0237	65.4145	76.2339	-0.761456	0.315909
bbx	ENSDARG00000012699	100005540	301.64	471.197	341.18	460.825	396.576	368.299	0.138011	0.849254
bc2	ENSDARG00000053979	798901	756.911	852.456	782.075	1638.92	2263.96	1278.16	1.11533	0.00577719
bcam	ENSDARG00000090190	767689	2883.38	2972.84	4277.95	933.218	881.052	803.921	-1.95256	5.53138e-08
bcan	ENSDARG00000099412	334113	351.289	355.842	665.742	62.6644	50.083	48.5125	-3.08919	6.75251e-11
bcap29	ENSDARG00000016231	554151	26.2296	32.2604	34.2158	76.1614	28.6189	29.7015	0.538219	0.631317
bcap31	ENSDARG00000044972	368488	148.01	161.302	114.378	201.49	223.84	180.189	0.51501	0.37481
bcar1	ENSDARG00000056525	568309	584.545	1007.89	737.106	1445.14	1999.23	1486.07	1.08171	0.0101444
bcar3	ENSDARG00000016981	570610	208.9	296.209	248.309	525.417	330.139	435.622	0.777478	0.106582
bcas2	ENSDARG00000043631	493614	452.46	637.386	636.414	592.902	1005.75	852.433	0.505755	0.344641
bcas3	ENSDARG00000114497	393594	229.509	229.733	284.48	442.507	429.283	314.836	0.674106	0.160134
bcat1	ENSDARG00000045568	337412	251.055	109.49	213.115	32.7783	43.9504	42.5722	-2.26641	3.25198e-05
bcat2	ENSDARG00000054849	436949	370.961	578.731	922.849	775.111	791.107	627.692	0.228621	0.763908
bccip	ENSDARG00000004948	541348	627.637	1762.59	1713.72	2799.65	1733.49	2085.05	0.689512	0.263039
bckdha	ENSDARG00000111762	554124	146.136	131.974	94.8266	50.1315	212.597	234.642	0.41486	0.675937
bckdhb	ENSDARG00000014676	569980	359.72	563.09	762.523	671.955	697.074	789.07	0.356857	0.572572
bckdhbl	ENSDARG00000093569	555648	314.755	307.94	352.911	577.477	677.654	549.478	0.887284	0.0264661
bckdk	ENSDARG00000016904	282677	622.953	776.204	835.843	1860.65	1995.14	1451.41	1.24773	0.000833828
bcl10	ENSDARG00000077130	100334750	27.1664	0.977587	5.86556	3.85627	2.0442	2.97015	-1.93886	1
bcl11aa	ENSDARG00000061352	678650	91.8036	84.0725	68.4316	55.916	91.9892	88.1145	-0.0505458	0.964098
bcl11ab	ENSDARG00000063153	566491	1022.95	818.24	1045.05	714.374	1839.78	1177.17	0.370389	0.584534
bcl11ba	ENSDARG00000062510	100093707	1872.61	858.321	2267.04	232.34	378.178	275.234	-2.49658	1.58528e-07
bcl2a	ENSDARG00000094704	570772	215.457	435.026	270.794	733.656	580.554	476.214	0.958832	0.054146
bcl2b	ENSDARG00000089109	100007048	89.93	46.9242	228.757	31.8142	18.3978	35.6418	-2.08932	0.00596692
bcl2l1	ENSDARG00000008434	114401	288.526	511.278	356.822	751.009	478.344	776.2	0.794302	0.115197
bcl2l10	ENSDARG00000026766	373113	756.911	1088.05	1012.79	2314.73	1511.69	1273.2	0.835601	0.0710499
bcl2l11	ENSDARG00000079144	100190951	7.49417	1.95517	3.91038	17.3532	5.11051	5.9403	1.08733	1
bcl2l13	ENSDARG00000111116	559355	506.793	525.942	399.836	271.867	375.112	227.712	-0.711993	0.145624
bcl2l16	ENSDARG00000114237	100359374	14.0516	19.5517	6.84316	14.461	4.08841	30.6916	0.284747	0.889564
bcl3	ENSDARG00000087832	565656	83.3726	118.288	36.171	45.3112	35.7736	48.5125	-0.875625	0.291519
bcl6a	ENSDARG00000116260	393707	271.664	285.455	198.452	129.185	160.47	102.965	-0.944755	0.0585991
bcl6ab	ENSDARG00000069295	100001936	153.63	143.705	135.886	145.574	188.067	107.916	0.0271459	0.978364
bcl6b	ENSDARG00000114369	793278	30.9134	14.6638	37.1486	83.8739	45.9946	25.7413	0.911871	0.368988
bcl7a	ENSDARG00000111533	57952	947.076	880.806	1439.02	456.004	912.737	671.254	-0.67947	0.205302
bcl7ba	ENSDARG00000111877	406444	69.3211	64.5207	64.5212	188.957	192.155	133.657	1.37563	0.00495496
bcl7bb	ENSDARG00000116093	81595	217.331	317.716	323.584	369.238	628.593	440.572	0.744363	0.143608
bcl9	ENSDARG00000036687	449616	909.605	880.806	998.123	1070.12	1386.99	1068.26	0.338226	0.509588
bcl9l	ENSDARG00000055054	449532	280.095	313.805	349.979	485.89	558.068	474.234	0.685718	0.116702
bco1	ENSDARG00000104256	84039	133.021	172.055	178.9	477.214	455.858	354.438	1.41183	0.000603923
bco1l	ENSDARG00000103659	393580	13.1148	21.5069	16.6191	72.3051	58.2598	16.8309	1.52527	0.10698
bco2a	ENSDARG00000055722	793849	14.0516	11.731	2.93278	4.82034	7.15472	7.9204	-0.531334	0.811775
bco2b	ENSDARG00000041715	678554	51.5224	62.5655	32.2606	44.3471	50.083	21.7811	-0.33304	0.770466
bco2l	ENSDARG00000027620	84041	19.6722	63.5431	37.1486	87.7302	71.5472	124.746	1.23989	0.0940993
bcor	ENSDARG00000017798	402921	1299.3	1262.06	1149.65	1232.08	1480	1029.65	0.0118458	0.987586
bcorl1	ENSDARG00000077912	792710	242.624	217.024	237.555	154.251	205.443	227.712	-0.247456	0.717351
bcr	ENSDARG00000079286	568320	244.497	74.2966	117.311	48.2034	187.045	188.11	-0.0436007	0.97601
bcs1l	ENSDARG00000012295	394157	84.3094	108.512	146.639	88.6943	103.232	84.1543	-0.298001	0.714766
bdh1	ENSDARG00000059388	100037356	43.0915	33.2379	41.0589	80.0177	62.3482	71.2836	0.863963	0.219591
bdh2	ENSDARG00000052696	550507	72.1314	189.652	261.018	217.879	249.393	188.11	0.326431	0.716348
bdkrb1	ENSDARG00000020744	368199	15.9251	1.95517	1.95519	2.8922	1.0221	8.91045	-0.630868	1
bdkrb2		100330960	9.36771	17.5966	0.977594	15.4251	9.19892	8.91045	0.264009	0.914525
bdnf	ENSDARG00000018817	58118	523.655	342.155	414.5	123.401	201.354	122.766	-1.51705	0.000777211
bean1	ENSDARG00000087413	101885923	14.0516	11.731	10.7535	15.4251	8.17682	4.95025	-0.354502	0.860216
becn1	ENSDARG00000079128	393846	191.101	126.109	101.67	80.9817	248.371	218.801	0.387324	0.666167
bend3	ENSDARG00000076903	565716	211.71	237.554	190.631	432.867	533.537	337.607	1.02696	0.0192265
bend4	ENSDARG00000113607	566937	14.0516	11.731	10.7535	22.1736	0	10.8906	-0.141566	0.959269
bend5	ENSDARG00000075624	566161	33.7238	19.5517	5.86556	28.922	5.11051	4.95025	-0.599649	0.753975
best1	ENSDARG00000078331	560608	32.787	24.4397	16.6191	8.67661	12.2652	10.8906	-1.21569	0.29334
best2	ENSDARG00000079163	567214	22.4825	26.3948	12.7087	7.71254	8.17682	0.99005	-1.86804	0.178429
best4	ENSDARG00000078455	563711	22.4825	31.2828	22.4847	19.2814	2.0442	22.7712	-0.78768	0.602869
bet1	ENSDARG00000113480	415135	39.3444	100.691	134.908	110.868	181.934	140.587	0.656938	0.410315
bet1l	ENSDARG00000032037	445493	104.918	177.921	231.69	461.789	280.056	194.05	0.863578	0.170889
bfsp1		560018	16.8619	17.5966	7.82075	17.3532	0	7.9204	-0.739056	0.738492
bfsp2	ENSDARG00000011998	494090	19.6722	11.731	7.82075	30.8502	36.7957	10.8906	0.999662	0.440904
bglapl	ENSDARG00000104467	337724	29.9767	50.8345	6.84316	63.6285	68.4809	105.935	1.44126	0.105167
bgna	ENSDARG00000017884	431774	89.93	144.683	72.342	112.796	497.764	215.831	1.42855	0.0367674
bgnb	ENSDARG00000110495	792197	175.176	178.898	309.897	2522	1815.25	1364.29	3.10236	2.2504e-12
bhlha15	ENSDARG00000045166	777671	9.36771	7.82069	2.93278	4.82034	0	0	-2.05177	1
bhlha9	ENSDARG00000113055	323481	8.43094	5.86552	0.977594	8.67661	0	2.97015	-0.388323	1
bhlhe22	ENSDARG00000058039	393930	221.078	97.7587	236.578	23.1376	9.19892	14.8508	-3.55389	1.78635e-08
bhlhe23	ENSDARG00000037588	559796	585.482	261.993	181.832	37.5987	15.3315	16.8309	-3.88084	1.35156e-09
bhlhe40	ENSDARG00000004060	324413	1692.75	1601.29	2140.93	2198.08	1926.66	2275.14	0.235798	0.674265
bhlhe41	ENSDARG00000112123	563771	48.7121	144.683	130.02	225.592	42.9283	150.488	0.37453	0.743872
bhmt	ENSDARG00000013430	322228	1239.35	2814.47	1997.22	10133.3	12643.4	10237.1	2.44785	4.09967e-09
bicc1a	ENSDARG00000061682	568201	73.0681	91.8931	35.1934	222.7	327.073	221.771	1.94628	0.000253649
bicc1b	ENSDARG00000070497	571411	809.37	1250.33	552.341	3240.23	4700.65	3382.01	2.11599	1.01862e-06
bicc2	ENSDARG00000076557	402785	35.5973	35.1931	44.9693	5.78441	14.3094	1.9801	-2.39525	0.0183139
bicd1a	ENSDARG00000113004	556758	46.8386	46.9242	32.2606	54.9519	2.0442	18.811	-0.731101	0.626135
bicd2	ENSDARG00000075571	557383	205.153	164.235	103.625	181.245	176.824	199.99	0.238228	0.760106
bicdl1	ENSDARG00000074761	100537719	49.6489	43.9914	7.82075	9.64068	5.11051	6.93035	-2.2249	0.0514552
bicra	ENSDARG00000061159	386775	765.342	637.386	555.273	541.806	694.007	661.354	-0.0456771	0.953322
bicral	ENSDARG00000016089	559084	207.963	174.988	165.213	196.67	153.315	126.726	-0.201422	0.789878
bida	ENSDARG00000112031	559425	116.16	127.086	109.491	309.466	294.365	230.682	1.24239	0.00428868
bik	ENSDARG00000045549	564030	133.021	285.455	325.539	69.4129	33.7294	39.602	-2.38042	2.8703e-05
bin1b	ENSDARG00000058820	447863	86.1829	100.691	44.9693	107.976	97.0997	70.2936	0.248124	0.797045
bin2a	ENSDARG00000003219	492780	20.609	18.5741	54.7453	0	12.2652	7.9204	-2.22296	0.101395
bin2b	ENSDARG00000010255	327387	43.0915	140.772	122.199	198.598	225.885	81.1841	0.724815	0.390066
bin3	ENSDARG00000099651	323976	355.036	425.25	662.809	456.968	512.073	515.816	0.0412444	0.962459
birc2	ENSDARG00000117094	373107	1087.59	1384.26	1555.35	2171.08	2028.87	1820.7	0.58019	0.182023
birc5a	ENSDARG00000075621	373110	222.015	446.757	485.864	361.526	382.266	310.876	-0.130472	0.876287
birc5b	ENSDARG00000110817	246726	0.936771	7.82069	0	0	1.0221	0	-3.03737	1
birc6	ENSDARG00000115931	796547	659.487	854.411	587.534	827.17	516.162	812.831	0.0372159	0.965176
birc6-as2	ENSDARG00000097706	101885944	128.338	95.8035	247.331	51.0956	5.11051	15.8408	-2.70681	0.000967113
birc7	ENSDARG00000109504	100073331	13.1148	5.86552	3.91038	12.5329	1.0221	5.9403	-0.229933	1
bivm		555455	21.5457	17.5966	18.5743	8.67661	5.11051	10.8906	-1.22458	0.350125
blcap	ENSDARG00000052073	57918	522.718	833.881	860.283	1315.95	826.881	965.299	0.487675	0.378349
blf	ENSDARG00000043126	503516	31.8502	71.3638	62.566	2.8922	23.5084	27.7214	-1.61664	0.113547
blk	ENSDARG00000007783	567764	14.9883	12.7086	48.8797	25.0658	11.2431	10.8906	-0.695908	0.641169
blm	ENSDARG00000077089	572540	143.326	209.204	130.02	79.0536	143.094	118.806	-0.501527	0.472737
blmh	ENSDARG00000025977	336541	321.312	427.205	506.394	425.154	555.002	441.563	0.180081	0.792313
blnk	ENSDARG00000042722	405764	40.2812	35.1931	46.9245	7.71254	2.0442	2.97015	-3.25803	0.000682021
bloc1s1	ENSDARG00000014171	556597	96.4874	160.324	190.631	210.167	132.873	126.726	0.0709186	0.944818
bloc1s2	ENSDARG00000046081	606665	113.349	151.526	215.071	136.898	189.089	182.169	0.0824944	0.930025
bloc1s3	ENSDARG00000068828	553529	58.0798	73.319	73.3195	56.88	50.083	51.4826	-0.369159	0.669959
bloc1s4	ENSDARG00000007597	445081	162.998	174.988	220.936	215.951	208.509	214.841	0.194022	0.782592
bloc1s5	ENSDARG00000111747	324781	67.4475	93.8483	134.908	89.6583	79.724	99.9951	-0.136383	0.889719
bloc1s6	ENSDARG00000042933	791215	191.101	324.559	346.068	620.86	510.029	435.622	0.862542	0.0776197
blvra	ENSDARG00000059857	767661	18.7354	14.6638	20.5295	24.1017	7.15472	9.9005	-0.387559	0.819279
blvrb	ENSDARG00000096829	436959	105.855	84.0725	130.02	122.437	131.851	74.2538	0.0381395	0.970985
blzf1	ENSDARG00000011299	114452	171.429	203.338	258.085	235.233	242.238	173.259	0.0403347	0.965085
bmb	ENSDARG00000096603	559540	49.6489	100.691	41.0589	34.7065	36.7957	40.5921	-0.771628	0.373514
bmf2	ENSDARG00000116024	751764	137.705	160.324	177.922	266.083	238.15	186.129	0.536775	0.338956
bmi1a	ENSDARG00000006010	321505	262.296	195.517	297.189	247.766	350.581	234.642	0.141581	0.856762
bmi1b	ENSDARG00000013076	394249	401.875	331.402	537.677	435.759	600.996	439.582	0.216026	0.752195
bmp10	ENSDARG00000061769	562533	29.0399	10.7535	19.5519	24.1017	0	1.9801	-1.18231	0.564571
bmp10l		571601	30.9134	26.3948	5.86556	14.461	14.3094	12.8707	-0.602214	0.705389
bmp15	ENSDARG00000037491	334183	19.6722	7.82069	5.86556	6.74848	7.15472	6.93035	-0.681154	0.732672
bmp16	ENSDARG00000103679	100329171	62.7637	26.3948	32.2606	99.299	229.973	143.557	1.95955	0.00161494
bmp1a	ENSDARG00000028071	572452	355.973	677.468	556.251	2202.9	1468.76	1158.36	1.60344	0.000354849
bmp1b	ENSDARG00000028053	559877	102.108	116.333	153.482	185.101	170.691	142.567	0.422498	0.520943
bmp2a	ENSDARG00000013409	30631	107.729	210.181	138.818	602.543	635.748	790.06	2.15127	5.03421e-07
bmp2b	ENSDARG00000115191	30632	222.015	373.438	358.777	1018.06	1081.38	871.244	1.6386	3.95918e-05
bmp2k	ENSDARG00000115681	494101	779.394	1067.52	1420.44	1308.24	1670.12	1524.68	0.462807	0.384585
bmp3	ENSDARG00000109238	777717	694.147	1176.04	837.798	2871.96	4417.53	3560.22	2.00241	3.55579e-07
bmp4	ENSDARG00000019995	30612	304.451	659.871	446.76	1645.66	2953.88	2018.71	2.22975	6.61247e-07
bmp5	ENSDARG00000101701	394026	251.055	437.959	238.533	971.781	1221.41	1272.21	1.90164	5.08497e-06
bmp6	ENSDARG00000015686	503761	52.4592	40.0811	62.566	109.904	198.288	112.866	1.44028	0.0120351
bmp7a	ENSDARG00000018260	30584	11.2413	8.79828	4.88797	3.85627	7.15472	0	-1.18215	1
bmp7b	ENSDARG00000063230	557567	175.176	407.654	229.735	654.602	795.196	697.986	1.4025	0.00264994
bmp8a	ENSDARG00000035677	561963	58.0798	127.086	62.566	186.065	146.161	100.985	0.806875	0.247668
bmper	ENSDARG00000101980	338246	262.296	476.085	177.922	1267.75	1896	1362.31	2.3044	1.10797e-06
bmpr1aa	ENSDARG00000115025	58145	587.355	648.14	658.898	935.146	1981.86	1219.74	1.1267	0.0115126
bmpr1ab	ENSDARG00000105045	447846	320.376	489.771	226.802	568.8	1180.53	758.379	1.27395	0.0121879
bmpr1ba	ENSDARG00000104100	30742	240.75	344.11	194.541	557.231	648.013	487.105	1.1186	0.0115052
bmpr1bb	ENSDARG00000102742	100149664	37.4708	43.9914	24.4398	60.7363	30.6631	21.7811	0.0967741	0.949267
bmpr2a	ENSDARG00000011941	562822	267.917	229.733	178.9	284.4	242.238	179.199	0.0610695	0.945461
bmpr2b	ENSDARG00000020057	555655	122.717	125.131	49.8573	54.9519	82.7903	58.413	-0.602663	0.467206
bms1	ENSDARG00000054154	553241	242.624	370.505	261.018	384.663	390.443	482.155	0.524469	0.321398
bmt2	ENSDARG00000109484	558558	180.797	165.212	268.838	299.825	414.974	327.707	0.761729	0.133559
bnc1	ENSDARG00000100757	568786	162.998	105.579	154.46	45.3112	178.868	122.766	-0.286944	0.775839
bnc2	ENSDARG00000069989	559327	659.487	668.669	513.237	1307.28	2147.44	1640.51	1.46827	0.000157997
bnip1a	ENSDARG00000114927	565822	5.62063	0.977587	0	0	9.19892	1.9801	0.753002	1
bnip1b	ENSDARG00000104280	795732	14.0516	7.82069	3.91038	6.74848	12.2652	0	-0.442294	1
bnip2	ENSDARG00000013397	394197	265.106	379.304	296.211	465.645	540.692	392.06	0.572141	0.253956
bnip3	ENSDARG00000099961	336116	18.7354	14.6638	15.6415	11.5688	0	15.8408	-0.83708	0.675358
bnip3la	ENSDARG00000025468	323563	28.1031	12.7086	10.7535	23.1376	21.4641	11.8806	0.129854	0.944913
bnip3lb	ENSDARG00000028067	554650	353.163	300.119	222.891	514.812	803.372	737.588	1.23014	0.00423299
bnip4	ENSDARG00000117207	568155	199.532	214.091	247.331	506.136	664.366	407.901	1.25584	0.00279837
bnipl	ENSDARG00000060435	100149386	38.4076	101.669	94.8266	60.7363	35.7736	39.602	-0.785893	0.353025
boc	ENSDARG00000074335	334628	794.382	1297.26	538.654	1128.92	2320.17	1474.19	0.904362	0.104662
bod1	ENSDARG00000103922	767743	175.176	178.898	328.472	172.568	265.747	145.537	-0.22545	0.789695
bod1l1	ENSDARG00000089505	100332682	172.366	192.585	108.513	190.885	128.785	124.746	-0.0911224	0.924597
boka	ENSDARG00000052129	445218	65.574	66.4759	113.401	195.706	212.597	179.199	1.25949	0.0135526
bokb	ENSDARG00000008807	394160	31.8502	19.5517	21.5071	41.4549	38.8399	13.8607	0.368235	0.786852
bola1	ENSDARG00000039915	445163	99.2977	98.7362	209.205	173.532	192.155	153.458	0.350481	0.660075
bola3	ENSDARG00000098130	445131	63.7004	105.579	186.72	177.389	176.824	111.876	0.389186	0.656248
bop1	ENSDARG00000063627	777627	143.326	271.769	184.765	256.442	155.36	253.453	0.149767	0.863889
bora	ENSDARG00000112916	555606	63.7004	109.49	62.566	26.9939	30.6631	61.3831	-0.985675	0.20956
borcs5	ENSDARG00000077830	449650	59.9534	62.5655	95.8042	71.341	67.4587	69.3035	-0.0687718	0.950919
borcs7	ENSDARG00000055070	664759	74.0049	31.2828	89.9386	72.3051	101.188	67.3234	0.302233	0.767915
borcs8	ENSDARG00000071339	558180	16.8619	52.7897	86.0283	77.1254	57.2377	30.6916	0.0855086	0.956837
bpgm	ENSDARG00000070826	436903	209.837	122.198	167.169	121.473	252.459	157.418	0.0893397	0.928521
bphl	ENSDARG00000102877	402804	55.2695	84.0725	48.8797	74.2332	101.188	164.348	0.8522	0.229468
bpifcl	ENSDARG00000099980	100003132	20.609	37.1483	27.3726	14.461	5.11051	23.7612	-0.972186	0.438252
bpnt1	ENSDARG00000043684	436627	78.6888	84.0725	154.46	109.904	155.36	154.448	0.404023	0.606352
bptf	ENSDARG00000077361	324479	1549.42	1628.66	1115.43	1130.85	1303.18	1327.66	-0.190815	0.755118
braf	ENSDARG00000017661	403065	740.986	523.009	632.503	405.873	788.041	459.383	-0.198232	0.788569
brap	ENSDARG00000008560	436739	117.096	94.8259	110.468	275.723	171.713	99.9951	0.764038	0.250864
brat1	ENSDARG00000062585	678547	133.958	240.486	140.774	170.64	127.763	209.891	-0.019129	0.985296
brca2	ENSDARG00000079015	566758	197.659	245.374	179.877	167.748	213.619	289.095	0.106069	0.900029
brcc3	ENSDARG00000098242	100333845	177.987	178.898	212.138	254.514	330.139	218.801	0.497626	0.376996
brd1a	ENSDARG00000116694	569574	286.652	189.652	197.474	141.718	196.244	128.707	-0.53041	0.384681
brd1b	ENSDARG00000051798	100009661	980.799	932.618	744.927	896.583	825.859	773.229	-0.0911151	0.892825
brd2a	ENSDARG00000022280	30445	2563.01	4334.62	1074.38	6061.1	8677.65	6043.27	1.38232	0.012965
brd2b	ENSDARG00000046087	569354	44.0282	43.9914	49.8573	58.8082	28.6189	26.7314	-0.271066	0.815281
brd3a	ENSDARG00000006527	327372	1262.77	1143.78	1319.75	1130.85	1628.21	1435.57	0.170747	0.779656
brd3b	ENSDARG00000100129	327108	2691.34	3460.66	3165.45	3622.97	4461.48	3917.63	0.365279	0.447029
brd4	ENSDARG00000078904	570531	711.946	1056.77	726.352	1184.84	876.964	907.876	0.251326	0.686859
brd7	ENSDARG00000008380	406675	461.828	546.471	619.795	563.98	605.085	501.956	0.0375916	0.961594
brd8	ENSDARG00000025071	337414	610.775	654.983	702.89	513.848	688.897	565.319	-0.155106	0.806502
brd9	ENSDARG00000017143	393245	227.635	175.966	174.012	238.125	202.376	169.299	0.0781526	0.92723
brdt	ENSDARG00000102802	333996	2111.48	3935.76	1598.37	3560.3	3551.81	4089.9	0.551068	0.341175
brf1a	ENSDARG00000017835	334402	74.9417	87.9828	73.3195	152.323	143.094	155.438	0.932551	0.0715171
brf1b	ENSDARG00000115325	334316	168.619	140.772	131.975	112.796	166.603	105.935	-0.196459	0.807173
brf2	ENSDARG00000002060	445142	27.1664	33.2379	35.1934	66.5207	38.8399	10.8906	0.283149	0.844921
bri3	ENSDARG00000086332	100002236	300.704	312.828	303.054	824.278	611.217	696.996	1.2183	0.00123222
bri3bp	ENSDARG00000010108	327046	37.4708	28.35	17.5967	24.1017	4.08841	0	-1.56178	0.334981
bricd5	ENSDARG00000056247	792755	29.0399	88.9604	31.283	3.85627	7.15472	12.8707	-2.64495	0.00561725
brinp1	ENSDARG00000078302	100334375	57.143	24.4397	32.2606	19.2814	9.19892	16.8309	-1.32819	0.177099
brinp2	ENSDARG00000014302	561009	269.79	156.414	266.883	46.2753	33.7294	38.612	-2.54606	2.82544e-07
brinp3a.1	ENSDARG00000076351	569746	259.486	202.36	349.979	120.509	281.078	125.736	-0.622992	0.367698
brinp3a.2	ENSDARG00000061051	100001603	87.1197	42.0362	65.4988	76.1614	28.6189	30.6916	-0.522067	0.61635
brinp3b	ENSDARG00000075352	100330048	75.8785	74.2966	90.9162	44.3471	57.2377	87.1244	-0.353553	0.694636
brip1	ENSDARG00000113993	794038	139.579	168.145	111.446	124.365	134.917	118.806	-0.1489	0.857549
brk1	ENSDARG00000041974	415187	774.71	973.676	1781.18	1007.45	1314.42	1317.76	0.0443324	0.962126
brms1	ENSDARG00000051955	791681	172.366	188.674	230.712	180.281	287.211	236.622	0.250665	0.724952
brms1la	ENSDARG00000006235	792017	680.096	573.843	698.002	776.075	1101.83	832.632	0.47357	0.33145
brms1lb	ENSDARG00000018047	562889	16.8619	11.731	29.3278	21.2095	11.2431	9.9005	-0.449926	0.779281
brox	ENSDARG00000013659	492786	29.0399	25.4173	25.4174	88.6943	25.5526	11.8806	0.660138	0.621978
brpf1		393991	22.4825	14.6638	7.82075	29.8861	19.4199	8.91045	0.371962	0.827573
brpf3a	ENSDARG00000110187	100149254	81.4991	59.6328	62.566	92.5505	38.8399	50.4926	-0.162675	0.885404
brpf3b	ENSDARG00000074238	100003354	60.8901	88.9604	41.0589	52.0597	64.3924	37.6219	-0.309561	0.76509
brsk2a	ENSDARG00000061421	100334759	60.8901	78.2069	34.2158	15.4251	2.0442	21.7811	-2.13991	0.0258424
brsk2b	ENSDARG00000077791	100149571	266.98	149.571	269.816	49.1675	35.7736	31.6816	-2.55646	5.93906e-07
brwd1	ENSDARG00000111353	798858	755.974	609.036	569.937	430.938	776.798	563.339	-0.127889	0.864623
brwd3	ENSDARG00000109876	553209	637.004	841.702	800.649	536.986	717.516	625.712	-0.27776	0.630001
bscl2	ENSDARG00000037008	567403	29.0399	12.7086	14.6639	36.6346	43.9504	50.4926	1.21426	0.176585
bscl2l	ENSDARG00000025912	541427	43.0915	39.1035	118.289	29.8861	12.2652	60.3931	-0.966184	0.361982
bsdc1	ENSDARG00000116408	794882	470.259	612.947	657.921	856.092	1006.77	725.707	0.572179	0.225064
bsg	ENSDARG00000019881	337692	2635.14	1546.54	3303.29	4207.19	4458.41	5161.13	0.885387	0.0538736
bsk146	ENSDARG00000099069	405767	14.9883	24.4397	7.82075	16.3892	2.0442	10.8906	-0.68513	0.716258
bsna		100004063	354.099	195.517	275.682	138.826	8.17682	60.3931	-1.99135	0.0164766
bsnb	ENSDARG00000079161	101175706	1516.63	998.116	2046.1	134.005	100.166	181.179	-3.45665	2.6754e-14
bsnd	ENSDARG00000086265	497323	4.68386	12.7086	0	14.461	1.0221	20.7911	1.06206	0.67498
bspry	ENSDARG00000104875	559377	24.356	36.1707	27.3726	14.461	16.3536	37.6219	-0.360771	0.792313
bsx	ENSDARG00000110782	573364	26.2296	11.731	42.0365	0	1.0221	2.97015	-4.32987	0.0018284
btaf1	ENSDARG00000060089	565357	482.437	466.309	551.363	447.328	798.262	497.995	0.216836	0.752149
btbd10a	ENSDARG00000062674	560466	670.728	651.073	681.383	437.687	589.753	327.707	-0.563982	0.266244
btbd10b	ENSDARG00000115689	557247	657.613	873.962	812.381	1299.56	1108.98	1149.45	0.602206	0.159776
btbd11a	ENSDARG00000063255	562893	229.509	339.223	399.836	543.734	691.963	661.354	0.969977	0.0288673
btbd11b	ENSDARG00000063040	100034519	59.0166	66.4759	34.2158	63.6285	84.8345	68.3135	0.440204	0.620795
btbd16	ENSDARG00000027710	565632	1.87354	10.7535	5.86556	5.78441	0	1.9801	-1.24446	1
btbd17a	ENSDARG00000099321	563263	25.2928	19.5517	10.7535	29.8861	18.3978	16.8309	0.227808	0.888462
btbd17b	ENSDARG00000112615	563672	29.0399	24.4397	12.7087	22.1736	2.0442	12.8707	-0.833026	0.60447
btbd18		100538298	4.68386	8.79828	3.91038	5.78441	0	10.8906	-0.0583357	1
btbd2a	ENSDARG00000116244	565970	555.505	527.897	994.213	425.154	553.979	425.722	-0.564536	0.311128
btbd3a	ENSDARG00000005544	563691	398.128	324.559	408.634	545.663	914.782	740.558	0.960002	0.0265337
btbd3b	ENSDARG00000087517	562593	52.4592	10.7535	49.8573	10.6047	14.3094	7.9204	-1.78543	0.0944242
btbd6a	ENSDARG00000076440	100141360	583.608	515.188	353.889	722.087	1564.84	959.359	1.15989	0.0162964
btbd6b	ENSDARG00000114044	553533	771.899	828.016	737.106	459.86	876.964	579.18	-0.286734	0.654375
btbd7	ENSDARG00000003069	568372	335.364	473.152	438.94	532.166	418.04	440.572	0.157113	0.816522
btbd9	ENSDARG00000068983	557659	107.729	146.638	110.468	160.999	194.199	157.418	0.490653	0.423262
btc	ENSDARG00000110368	503869	43.0915	93.8483	73.3195	57.8441	116.52	54.4528	0.121824	0.919206
btd	ENSDARG00000099596	555376	44.0282	78.2069	56.7005	99.299	124.696	107.916	0.891737	0.154527
btf3	ENSDARG00000116462	556625	5248.73	12373.3	9515.9	20619.5	12577	16462.6	0.871758	0.0854395
btf3l4	ENSDARG00000089681	393667	358.783	654.983	898.409	748.117	607.129	585.12	0.0212821	0.981879
btg1	ENSDARG00000027249	114432	3823.9	8428.75	3385.41	15179.3	10506.2	10375.7	1.2054	0.0158306
btg2	ENSDARG00000020298	30079	12860.9	19490.1	1098.82	57034.3	53265.8	35828.9	2.12717	0.139779
btg3	ENSDARG00000115730	492479	642.625	899.38	660.854	1406.58	1419.7	1200.93	0.870448	0.0288999
btk	ENSDARG00000113249	568653	14.9883	28.35	64.5212	23.1376	42.9283	16.8309	-0.379914	0.790795
btr01	ENSDARG00000051965	563047	22.4825	18.5741	14.6639	9.64068	2.0442	13.8607	-1.12307	0.458387
btr02	ENSDARG00000052215	562439	32.787	35.1931	84.0731	24.1017	26.5747	34.6518	-0.833065	0.387769
btr04	ENSDARG00000060962	565512	129.274	100.691	164.236	93.5146	181.934	131.677	0.0460456	0.965235
btr05	ENSDARG00000074813	794264	4.68386	24.4397	3.91038	17.3532	4.08841	0.99005	-0.554622	0.82764
btr06	ENSDARG00000105558	100151764	24.356	8.79828	3.91038	21.2095	2.0442	32.6717	0.592564	0.77088
btr07	ENSDARG00000105558	793570	15.9251	0.977587	1.95519	0	8.17682	2.97015	-0.765395	1
btr09	ENSDARG00000115798	100170790	29.9767	25.4173	44.9693	73.2692	16.3536	25.7413	0.202724	0.893105
btr12	ENSDARG00000051809	767681	45.9018	67.4535	65.4988	28.922	9.19892	28.7115	-1.41782	0.084841
btr14		569717	14.0516	10.7535	4.88797	12.5329	2.0442	6.93035	-0.463082	0.841066
btr16	ENSDARG00000095113	767728	26.2296	22.4845	25.4174	16.3892	21.4641	26.7314	-0.199483	0.891762
btr18	ENSDARG00000103618	571162	8.43094	7.82069	6.84316	15.4251	1.0221	4.95025	-0.10663	1
btr20	ENSDARG00000102992	678596	1.87354	0	6.84316	5.78441	2.0442	0	-0.151898	1
btr22	ENSDARG00000103618	100144555	19.6722	24.4397	19.5519	4.82034	11.2431	30.6916	-0.445764	0.790413
btr23	ENSDARG00000099509	100334710	14.9883	15.6414	13.6863	2.8922	15.3315	26.7314	0.0194506	0.992356
btr25	ENSDARG00000102018	571141	27.1664	26.3948	29.3278	24.1017	7.15472	21.7811	-0.642108	0.622605
btr26	ENSDARG00000105241	100149795	14.0516	14.6638	14.6639	10.6047	2.0442	4.95025	-1.29701	0.425879
btr29	ENSDARG00000099138	797384	14.0516	11.731	2.93278	11.5688	8.17682	4.95025	-0.217984	0.92966
btr30	ENSDARG00000102591	393394	26.2296	0	0	0	0	0	-5.584	1
btr31	ENSDARG00000096304	555877	7.49417	5.86552	3.91038	12.5329	7.15472	7.9204	0.676695	1
btr33	ENSDARG00000008164	799840	29.0399	17.5966	21.5071	5.78441	0	4.95025	-2.65927	0.0500497
bub1	ENSDARG00000077029	100307076	212.647	267.859	166.191	137.862	181.934	174.249	-0.388651	0.550454
bub1ba	ENSDARG00000078825	567931	96.4874	149.571	104.603	80.0177	132.873	99.005	-0.169308	0.852711
bub1bb	ENSDARG00000074927	567006	101.171	192.585	175.967	71.341	104.254	112.866	-0.703441	0.277992
bub3	ENSDARG00000075883	403012	491.805	906.223	590.467	462.753	723.648	656.403	-0.109792	0.891761
buc	ENSDARG00000096095	334375	25.2928	10.7535	13.6863	30.8502	0	5.9403	-0.432533	0.857923
buc2l	ENSDARG00000096628	100537720	28.1031	15.6414	6.84316	14.461	19.4199	15.8408	-0.0270678	0.988822
bud23	ENSDARG00000063596	572367	94.6139	241.464	201.384	341.28	230.995	304.936	0.707304	0.260402
bud31	ENSDARG00000017084	445383	417.8	621.745	1004.97	714.374	670.499	508.886	-0.110388	0.897828
bves	ENSDARG00000058548	415107	22.4825	25.4173	46.9245	78.0895	195.222	100.985	1.98113	0.00256705
bxdc2	ENSDARG00000098935	402823	261.359	667.692	554.296	605.435	412.929	572.249	0.100974	0.911759
bysl	ENSDARG00000001057	394081	380.329	605.126	617.839	859.949	880.03	937.578	0.740009	0.0987595
bzw1a	ENSDARG00000010481	325226	1228.11	1549.47	2075.43	2100.7	2058.51	1932.58	0.328029	0.554112
bzw1b	ENSDARG00000099148	406812	2180.8	4027.66	1007.9	10092.8	11520.1	7900.6	2.03204	0.000113694
bzw2	ENSDARG00000035918	393892	311.008	375.393	305.987	89.6583	89.945	157.418	-1.55799	0.000723473
c10h21orf59	ENSDARG00000111366	792532	129.274	269.814	193.564	348.993	135.94	260.383	0.331242	0.697785
c13h10orf11	ENSDARG00000057166	553730	89.93	113.4	137.841	140.754	100.166	99.9951	-0.000443203	0.999533
c13h10orf71		101884346	120.843	70.3862	49.8573	61.7004	62.3482	34.6518	-0.603939	0.494759
c13h7orf72	ENSDARG00000109818	101884205	10.3045	1.95517	7.82075	0.964068	2.0442	3.9602	-1.52946	1
c14h4orf45		103908779	5.62063	4.88793	3.91038	2.8922	0	4.95025	-0.875702	1
c15h3orf80		101887089	73.0681	87.9828	58.6556	46.2753	55.1935	27.7214	-0.766492	0.325454
c16h2orf66	ENSDARG00000116758	103908919	7.49417	17.5966	44.9693	0	0	2.97015	-4.55788	0.00570587
c17h14orf159	ENSDARG00000005179	560387	304.451	302.074	554.296	375.987	318.896	302.955	-0.21809	0.767215
c17h15orf52		796966	16.8619	11.731	1.95519	25.0658	5.11051	6.93035	0.281235	0.907364
c18h15orf65		103909108	10.3045	0.977587	16.6191	4.82034	1.0221	3.9602	-1.5057	1
c18h3orf33	ENSDARG00000040582	565816	54.3327	90.9156	78.2075	37.5987	117.542	59.403	-0.059449	0.964289
c19h1orf109	ENSDARG00000012113	286778	87.1197	135.885	213.115	262.227	77.6798	188.11	0.276607	0.784667
c19h1orf216		101883800	118.97	177.921	220.936	276.688	54.1714	109.896	-0.231658	0.838176
c1d	ENSDARG00000021112	474329	128.338	267.859	384.194	282.472	111.409	174.249	-0.457351	0.592273
c1galt1a	ENSDARG00000112143	557675	49.6489	25.4173	16.6191	25.0658	19.4199	4.95025	-0.891554	0.504664
c1galt1b	ENSDARG00000113870	337131	70.2578	98.7362	57.678	156.179	162.514	85.1443	0.833229	0.204057
c1galt1c1	ENSDARG00000036335	324052	301.64	373.438	402.769	326.819	425.195	327.707	0.00247856	0.997862
c1qa	ENSDARG00000109639	553548	14.0516	26.3948	9.77594	8.67661	1.0221	7.9204	-1.507	0.346621
c1qb	ENSDARG00000044612	445088	9.36771	12.7086	30.3054	1.92814	2.0442	0.99005	-3.39994	0.0235487
c1qbp	ENSDARG00000039887	334619	605.154	1368.62	1206.35	1127.96	745.113	1067.27	-0.112966	0.893387
c1qc	ENSDARG00000109447	449803	19.6722	45.9466	47.9021	9.64068	0	0	-3.54435	0.0102482
c1ql1	ENSDARG00000028521	556064	32.787	7.82069	10.7535	13.497	15.3315	5.9403	-0.565101	0.751743
c1ql1b		571639	64.6372	67.4535	22.4847	17.3532	22.4862	10.8906	-1.60856	0.0705754
c1ql2	ENSDARG00000015592	100005110	33.7238	22.4845	16.6191	15.4251	0	0	-2.23261	0.216537
c1ql3a	ENSDARG00000010350	100151368	32.787	21.5069	49.8573	53.0237	30.6631	53.4627	0.397831	0.725715
c1ql3b	ENSDARG00000036483	403002	37.4708	37.1483	42.0365	38.5627	36.7957	36.6319	-0.0587113	0.965085
c1ql4a	ENSDARG00000115758	559288	102.108	40.0811	174.989	65.5566	21.4641	33.6617	-1.39271	0.0965794
c1ql4b	ENSDARG00000113446	567540	37.4708	35.1931	52.7901	6.74848	0	10.8906	-2.82536	0.00943262
c1ql4l	ENSDARG00000110017	100007371	2.81031	8.79828	10.7535	0	2.0442	0.99005	-2.89235	1
c1qtnf1	ENSDARG00000088878	550573	47.7753	67.4535	57.678	427.082	661.3	420.771	3.12606	1.06192e-12
c1qtnf12	ENSDARG00000070681	790933	200.469	418.407	385.172	1281.25	663.344	953.419	1.52952	0.0013679
c1qtnf2	ENSDARG00000059944	572041	24.356	45.9466	80.1627	124.365	155.36	103.955	1.35136	0.0425551
c1qtnf4	ENSDARG00000024299	550397	89.93	28.35	126.11	10.6047	4.08841	2.97015	-3.78518	2.37604e-05
c1qtnf5	ENSDARG00000056134	555815	51.5224	95.8035	74.2971	610.255	383.288	596.01	2.84326	3.49826e-10
c1qtnf6a	ENSDARG00000055175	565113	52.4592	106.557	46.9245	595.794	559.09	294.045	2.81515	7.65154e-08
c1qtnf6b	ENSDARG00000006544	570839	13.1148	10.7535	7.82075	7.71254	55.1935	93.0647	2.29783	0.0313339
c1qtnf7	ENSDARG00000074949	564609	8.43094	3.91035	4.88797	3.85627	1.0221	0	-1.81494	1
c1qtnf9	ENSDARG00000112904	799425	32.787	8.79828	17.5967	0	5.11051	6.93035	-2.30236	0.143929
c1r	ENSDARG00000100248	560927	8.43094	0	9.77594	10.6047	1.0221	1.9801	-0.417309	1
c1s	ENSDARG00000100599	793529	24.356	28.35	19.5519	12.5329	120.608	60.3931	1.42031	0.163593
c20h2orf81		100536360	38.4076	29.3276	106.558	39.5268	45.9946	26.7314	-0.634607	0.556404
c23h1orf87		103909720	14.0516	4.88793	11.7311	0.964068	0	0.99005	-3.96046	1
c23h20orf24	ENSDARG00000074790	334006	482.437	583.619	448.716	460.825	686.853	645.513	0.243341	0.700174
c24h7orf50	ENSDARG00000045254	567594	76.8152	233.643	170.101	331.639	131.851	211.871	0.491635	0.564802
c25h12orf75	ENSDARG00000100152	100535414	57.143	55.7224	171.079	18.3173	16.3536	25.7413	-2.23204	0.00263158
c2cd2	ENSDARG00000105000	100332559	452.46	428.183	408.634	303.681	628.593	464.334	0.115118	0.8858
c2cd2l	ENSDARG00000061066	566488	359.72	207.248	300.121	56.88	96.0776	88.1145	-1.84754	0.00012212
c2cd3	ENSDARG00000074137	797081	153.63	168.145	155.437	231.376	150.249	207.911	0.305295	0.654354
c2cd4a	ENSDARG00000061416	569005	40.2812	87.0052	7.82075	25.0658	47.0167	45.5423	-0.200287	0.903434
c2cd5	ENSDARG00000094590	393585	464.638	560.157	727.33	387.555	393.509	321.766	-0.667822	0.156012
c2h1orf27	ENSDARG00000042671	393588	59.9534	71.3638	92.8714	88.6943	242.238	135.637	1.05713	0.104799
c3a.1	ENSDARG00000012694	321046	21.5457	32.2604	164.236	54.9519	5.11051	20.7911	-1.42899	0.253888
c3a.2	ENSDARG00000087359	30491	26.2296	49.8569	41.0589	45.3112	29.641	57.4229	0.177567	0.887424
c3a.3	ENSDARG00000052207	565074	10.3045	11.731	43.0141	13.497	16.3536	27.7214	-0.175317	0.927003
c3a.4	ENSDARG00000093198	100331428	29.0399	14.6638	11.7311	23.1376	4.08841	12.8707	-0.465817	0.792495
c3a.6	ENSDARG00000043719	494039	22.4825	35.1931	31.283	37.5987	12.2652	26.7314	-0.213713	0.885196
c3ar1	ENSDARG00000031749	794255	20.609	10.7535	5.86556	11.5688	5.11051	13.8607	-0.285921	0.892989
c3b.1	ENSDARG00000093068	563665	62.7637	71.3638	92.8714	37.5987	8.17682	52.4727	-1.20662	0.179306
c3b.2	ENSDARG00000115568	566347	28.1031	10.7535	32.2606	10.6047	5.11051	30.6916	-0.615394	0.706931
c4	ENSDARG00000015065	566261	432.788	281.545	515.192	179.317	428.261	297.015	-0.443093	0.53157
c5	ENSDARG00000021004	565774	24.356	22.4845	36.171	24.1017	5.11051	9.9005	-1.08221	0.388892
c5ar1	ENSDARG00000040319	100000959	17.7987	28.35	22.4847	7.71254	0	8.91045	-2.04078	0.151073
c5h9orf84		100002712	10.3045	0.977587	4.88797	3.85627	5.11051	0	-0.853708	1
c6	ENSDARG00000115290	393611	283.842	390.057	316.74	1918.5	1902.13	1218.75	2.34691	1.29273e-09
c6ast3	ENSDARG00000024503	541399	4.68386	1.95517	7.82075	5.78441	0	0	-1.31411	1
c6ast4	ENSDARG00000052578	574001	3.74708	5.86552	72.342	2.8922	0	0	-4.80357	0.00997259
c6h1orf226		108179105	110.539	70.3862	92.8714	255.478	196.244	189.1	1.22658	0.0119274
c7a	ENSDARG00000042172	562475	105.855	119.266	107.535	1003.59	753.289	1080.15	3.09243	5.00034e-16
c7b	ENSDARG00000114734	570832	186.417	116.333	173.034	65.5566	55.1935	29.7015	-1.66087	0.00329153
c8a	ENSDARG00000039516	445102	22.4825	15.6414	39.1038	10.6047	7.15472	8.91045	-1.53243	0.177991
c8b	ENSDARG00000039517	793127	30.9134	17.5966	18.5743	5.78441	7.15472	5.9403	-1.83076	0.117378
c8g	ENSDARG00000032098	393837	12.178	0.977587	19.5519	10.6047	1.0221	6.93035	-0.814795	0.737974
c8h22orf15		101886360	14.0516	15.6414	4.88797	0	7.15472	13.8607	-0.720569	0.765515
c9	ENSDARG00000016319	554141	29.9767	28.35	145.662	2.8922	7.15472	8.91045	-3.42986	0.000565974
c9hxorf21		796876	29.0399	10.7535	18.5743	0	5.11051	18.811	-1.28843	0.488354
ca10a	ENSDARG00000052644	641327	218.268	135.885	350.956	18.3173	47.0167	31.6816	-2.86349	1.58802e-06
ca10b	ENSDARG00000009568	568543	161.125	164.235	187.698	184.137	264.724	185.139	0.305162	0.650625
ca12	ENSDARG00000045644	100537787	49.6489	48.8793	97.7594	28.922	30.6631	22.7712	-1.25285	0.0977148
ca14	ENSDARG00000061697	567897	102.108	108.512	23.4623	11.5688	50.083	27.7214	-1.3911	0.150261
ca15a	ENSDARG00000015654	553469	22.4825	32.2604	165.213	26.0298	12.2652	6.93035	-2.27989	0.0274021
ca15b	ENSDARG00000040510	791844	10.3045	1.95517	7.82075	1.92814	2.0442	0.99005	-2.01828	1
ca15c	ENSDARG00000002259	768190	4.68386	3.91035	24.4398	18.3173	4.08841	16.8309	0.251069	0.916561
ca16b	ENSDARG00000110045	569183	331.617	222.89	344.113	78.0895	100.166	102.965	-1.67639	0.000177641
ca16c	ENSDARG00000051814	497461	1087.59	1130.09	1170.18	149.431	127.763	137.617	-3.02962	1.11043e-17
ca2	ENSDARG00000014488	387526	339.111	580.686	1103.7	293.077	255.526	446.513	-1.02377	0.0898932
ca4a	ENSDARG00000043589	555196	125.527	77.2293	132.953	115.688	255.526	181.179	0.717912	0.276412
ca4b	ENSDARG00000042293	553246	8.43094	3.91035	34.2158	8.67661	1.0221	1.9801	-1.98855	0.282223
ca4c	ENSDARG00000044512	407683	9.36771	3.91035	19.5519	16.3892	5.11051	0.99005	-0.54288	0.822422
ca5a	ENSDARG00000111390	569989	681.969	1074.37	938.49	1833.66	2595.12	2136.53	1.28471	0.000997774
ca6	ENSDARG00000110050	100006448	252.928	497.592	752.747	1829.8	3261.53	1476.17	2.12735	4.8943e-05
ca7	ENSDARG00000113549	564201	81.4991	42.0362	10.7535	9.64068	11.2431	6.93035	-2.2729	0.0294323
ca8	ENSDARG00000039098	550233	185.481	172.055	286.435	189.921	453.813	323.747	0.587055	0.374747
ca9	ENSDARG00000102300	566612	25.2928	46.9242	16.6191	13.497	7.15472	6.93035	-1.6851	0.124854
caap1	ENSDARG00000079652	100329847	115.223	150.548	174.012	150.395	162.514	194.05	0.205308	0.788464
cab39	ENSDARG00000043451	415235	33.7238	19.5517	32.2606	0	26.5747	12.8707	-1.11996	0.495174
cab39l	ENSDARG00000036658	492361	619.206	496.614	747.859	579.405	1143.73	923.717	0.50602	0.3759
cab39l1	ENSDARG00000112995	406822	91.8036	95.8035	70.3868	205.347	268.813	184.149	1.3511	0.00432511
cabin1	ENSDARG00000079326	571383	212.647	237.554	184.765	246.801	188.067	250.483	0.110342	0.887407
cables1	ENSDARG00000099395	100126070	162.998	142.728	238.533	351.885	170.691	197.02	0.403323	0.585945
cables2a	ENSDARG00000076964	100148748	313.818	212.136	258.085	251.622	317.874	166.328	-0.0918694	0.916977
cables2b	ENSDARG00000017154	564291	98.361	77.2293	75.2747	107.012	130.829	144.547	0.607623	0.332756
cabp1a	ENSDARG00000019990	449789	55.2695	91.8931	142.729	7.71254	9.19892	27.7214	-2.69904	0.000472056
cabp1b	ENSDARG00000033411	436687	12.178	3.91035	7.82075	0	1.0221	10.8906	-1.00612	1
cabp2a	ENSDARG00000052016	572226	574.241	393.967	136.863	35.6705	22.4862	42.5722	-3.45491	2.79275e-08
cabp2b	ENSDARG00000052277	559616	51.5224	88.9604	58.6556	10.6047	11.2431	10.8906	-2.60466	0.000254946
cabp4	ENSDARG00000008866	797905	24.356	18.5741	9.77594	4.82034	1.0221	2.97015	-2.57459	0.0737748
cabp5a	ENSDARG00000002576	393671	217.331	112.422	32.2606	16.3892	21.4641	11.8806	-2.86505	0.000339545
cabp5b	ENSDARG00000028485	553766	227.635	125.131	61.5884	11.5688	14.3094	42.5722	-2.59815	0.000693967
cabp7b	ENSDARG00000060846	556082	96.4874	98.7362	427.209	27.958	7.15472	6.93035	-3.88393	3.76281e-06
cabz01076234.2	ENSDARG00000067794	100332077	23.4193	18.5741	7.82075	25.0658	5.11051	16.8309	-0.0824983	0.968648
cabz01093075.1	ENSDARG00000086616	100329767	19.6722	5.86552	5.86556	36.6346	32.7073	6.93035	1.27759	0.366791
cachd1	ENSDARG00000113216	794807	1007.97	1570	1161.38	1780.63	2362.08	1958.32	0.706279	0.106832
cacna1aa	ENSDARG00000037905	562059	1736.77	733.19	2208.38	722.087	614.283	456.413	-1.38378	0.00732968
cacna1ab	ENSDARG00000006923	569528	287.589	205.293	641.302	58.8082	18.3978	29.7015	-3.40511	8.96138e-08
cacna1ba	ENSDARG00000021735	555941	406.559	213.114	505.416	90.6224	26.5747	72.2737	-2.56876	1.25685e-05
cacna1bb	ENSDARG00000116562	562796	138.642	49.8569	86.0283	44.3471	2.0442	45.5423	-1.57699	0.134783
cacna1c	ENSDARG00000008398	170581	824.359	782.069	1044.07	1212.8	1406.41	1158.36	0.51119	0.262029
cacna1da	ENSDARG00000102773	403310	96.4874	56.7	72.342	52.0597	1.0221	10.8906	-1.81491	0.11412
cacna1db		403311	104.918	46.9242	36.171	62.6644	2.0442	22.7712	-1.10226	0.401742
cacna1e	ENSDARG00000062346	564274	134.895	53.7673	90.9162	30.8502	8.17682	36.6319	-1.88422	0.0163329
cacna1eb	ENSDARG00000095614	567702	59.9534	18.5741	19.5519	43.3831	16.3536	17.8209	-0.338592	0.822009
cacna1fa		793708	578.925	174.988	67.454	152.323	94.0334	69.3035	-1.3797	0.10203
cacna1fb	ENSDARG00000112226	559964	300.704	149.571	58.6556	35.6705	18.3978	22.7712	-2.72657	0.000135007
cacna1g	ENSDARG00000089913	563904	450.587	486.838	504.438	913.937	1119.2	929.657	1.03902	0.00492887
cacna1ha	ENSDARG00000060496	560875	212.647	139.795	146.639	197.634	159.448	122.766	-0.0568214	0.953322
cacna1hb	ENSDARG00000099708	100007317	58.0798	36.1707	16.6191	32.7783	11.2431	11.8806	-0.986632	0.405802
cacna1i	ENSDARG00000070522	566351	102.108	59.6328	61.5884	31.8142	15.3315	16.8309	-1.80203	0.0114849
cacna1sa	ENSDARG00000029457	570683	26.2296	24.4397	16.6191	29.8861	1.0221	13.8607	-0.585256	0.747584
cacna1sb	ENSDARG00000042552	405791	31.8502	25.4173	17.5967	23.1376	8.17682	14.8508	-0.695908	0.601984
cacna2d1	ENSDARG00000073752	101882457	66.5107	46.9242	51.8125	42.419	15.3315	22.7712	-1.0355	0.232411
cacna2d1a	ENSDARG00000014804	561434	204.216	165.212	123.177	312.358	386.355	343.548	1.08081	0.0171367
cacna2d2a	ENSDARG00000103390	541376	388.76	275.679	595.355	65.5566	30.6631	75.2438	-2.87617	6.38781e-08
cacna2d2b	ENSDARG00000078169	568759	390.634	212.136	470.223	26.9939	23.5084	16.8309	-3.99373	5.46794e-14
cacna2d3	ENSDARG00000078760	100148645	182.67	53.7673	293.278	43.3831	32.7073	34.6518	-2.25759	0.00112591
cacna2d3a	ENSDARG00000106018	100535196	17.7987	7.82069	2.93278	16.3892	1.0221	17.8209	0.303136	0.905636
cacna2d4a	ENSDARG00000026855	568225	93.6771	48.8793	24.4398	8.67661	22.4862	10.8906	-1.9929	0.0285503
cacna2d4b	ENSDARG00000023886	100150428	412.179	93.8483	43.9917	21.2095	22.4862	36.6319	-2.77596	0.000967113
cacnb1	ENSDARG00000002167	436925	778.457	442.847	974.661	323.927	478.344	271.274	-1.03265	0.0449084
cacnb2a	ENSDARG00000099045	795492	30.9134	62.5655	40.0814	223.664	32.7073	86.1344	1.35981	0.121754
cacnb2b	ENSDARG00000055565	558806	22.4825	11.731	11.7311	1.92814	0	10.8906	-1.84052	0.324471
cacnb3a	ENSDARG00000113797	565158	63.7004	46.9242	43.9917	12.5329	11.2431	11.8806	-2.11641	0.00512758
cacnb3b	ENSDARG00000076030	559015	72.1314	71.3638	60.6108	24.1017	12.2652	27.7214	-1.66967	0.017835
cacnb4a	ENSDARG00000009738	562422	29.9767	19.5517	11.7311	6.74848	2.0442	12.8707	-1.49836	0.291916
cacnb4b	ENSDARG00000062174	678560	1247.78	872.007	1691.24	215.951	548.869	328.697	-1.80149	0.000250926
cacng1a	ENSDARG00000008772	322013	49.6489	33.2379	46.9245	15.4251	38.8399	18.811	-0.831154	0.405241
cacng1b	ENSDARG00000052360	571193	6.5574	5.86552	5.86556	7.71254	0	7.9204	-0.223569	1
cacng2a	ENSDARG00000032565	393614	222.015	105.579	341.18	27.958	11.2431	30.6916	-3.25636	4.9219e-07
cacng2b	ENSDARG00000102376	569855	159.251	80.1621	300.121	20.2454	1.0221	10.8906	-4.06234	1.34883e-06
cacng3a	ENSDARG00000058460	567438	11.2413	7.82069	2.93278	0	12.2652	6.93035	-0.200658	1
cacng3b	ENSDARG00000076401	564883	277.284	172.055	465.335	115.688	166.603	98.015	-1.26638	0.0260187
cacng4a	ENSDARG00000115540	797554	6.5574	8.79828	3.91038	3.85627	2.0442	1.9801	-1.28733	1
cacng4b	ENSDARG00000074669	794222	27.1664	12.7086	11.7311	7.71254	4.08841	18.811	-0.753618	0.65824
cacng5a	ENSDARG00000003326	797409	35.5973	18.5741	18.5743	6.74848	5.11051	5.9403	-2.03076	0.0737485
cacng5b	ENSDARG00000039240	100331116	10.3045	4.88793	5.86556	9.64068	4.08841	4.95025	-0.172289	1
cacng6a	ENSDARG00000036457	100034580	37.4708	22.4845	36.171	30.8502	30.6631	35.6418	0.0149681	0.991109
cacng6b	ENSDARG00000046079	100003220	12.178	5.86552	9.77594	0	0	0.99005	-4.70631	1
cacng7a	ENSDARG00000063006	100034540	40.2812	22.4845	26.395	19.2814	14.3094	7.9204	-1.10276	0.319886
cacng7b	ENSDARG00000070624	100003278	45.9018	31.2828	64.5212	20.2454	11.2431	11.8806	-1.70631	0.0436073
cacng8a	ENSDARG00000020450	550428	128.338	19.5517	172.057	1.92814	2.0442	17.8209	-3.87554	0.000286684
cacng8b	ENSDARG00000070626	100003329	127.401	77.2293	224.847	33.7424	16.3536	23.7612	-2.53793	8.82999e-05
cactin	ENSDARG00000059866	100126813	218.268	191.607	118.289	205.347	303.564	283.154	0.584214	0.329622
cacul1	ENSDARG00000021885	100538081	47.7753	136.862	82.1179	130.149	103.232	146.527	0.510914	0.531564
cacybp	ENSDARG00000014731	405823	227.635	720.481	561.139	1037.34	602.018	893.026	0.746881	0.240582
cad	ENSDARG00000041895	266992	773.773	1614.97	1044.07	1038.3	1763.13	1973.17	0.476004	0.451084
cadm1a	ENSDARG00000031075	569931	1371.43	973.676	1494.74	712.446	611.217	617.792	-0.983882	0.013637
cadm1b	ENSDARG00000042677	562183	7.49417	3.91035	0	2.8922	0	0.99005	-1.54953	1
cadm2a	ENSDARG00000110607	793954	1397.66	1113.47	2378.49	714.374	717.516	426.712	-1.3955	0.00292001
cadm2b	ENSDARG00000062633	571698	162.998	57.6776	171.079	10.6047	40.8841	26.7314	-2.3268	0.00143147
cadm3	ENSDARG00000057013	692273	1294.62	1825.15	991.28	233.304	97.0997	168.309	-3.04264	1.1865e-10
cadm4	ENSDARG00000040291	492787	1243.1	968.788	1755.76	128.221	251.437	199	-2.77792	3.49826e-10
cadps2	ENSDARG00000117190	407617	289.462	207.248	230.712	55.916	50.083	56.4329	-2.16286	1.3396e-06
cadpsa	ENSDARG00000043661	100333933	94.6139	56.7	36.171	26.0298	4.08841	5.9403	-2.37408	0.0128588
cadpsb	ENSDARG00000070567	100001129	998.598	463.376	1538.73	109.904	55.1935	38.612	-3.87984	6.75251e-11
cahz	ENSDARG00000011166	30331	711.009	400.811	606.108	149.431	631.659	628.682	-0.285429	0.766871
calb1	ENSDARG00000031598	100001650	74.9417	49.8569	110.468	9.64068	2.0442	6.93035	-3.65295	5.71631e-06
calb2a	ENSDARG00000110220	393691	827.169	330.424	957.065	27.958	99.1439	10.8906	-3.93959	1.56631e-07
calb2b	ENSDARG00000036344	393684	1160.66	744.921	389.082	80.9817	64.3924	69.3035	-3.41782	1.59335e-11
calca	ENSDARG00000056590	436744	79.6255	63.5431	101.67	34.7065	28.6189	17.8209	-1.59273	0.0163447
calcoco1a	ENSDARG00000036695	334971	733.492	527.897	632.503	1176.16	1832.63	1441.51	1.23243	0.00173304
calcoco1b	ENSDARG00000016391	386968	40.2812	24.4397	19.5519	21.2095	40.8841	18.811	-0.0610078	0.969744
calcoco2	ENSDARG00000052515	553776	26.2296	59.6328	47.9021	49.1675	29.641	41.5821	-0.150465	0.90721
calcr	ENSDARG00000109526	560268	55.2695	56.7	30.3054	21.2095	9.19892	19.801	-1.50096	0.0839293
calcrl2	ENSDARG00000033955	100537117	10.3045	5.86552	0	16.3892	4.08841	11.8806	0.99937	0.674344
calcrla	ENSDARG00000011473	445508	126.464	300.119	326.516	814.638	995.528	735.608	1.75749	0.000234205
calcrlb	ENSDARG00000011571	567131	29.0399	11.731	16.6191	67.4848	85.8566	54.4528	1.85396	0.0105514
cald1a	ENSDARG00000112416	322909	1534.43	2407.8	1764.56	12786.4	14005.9	11936	2.76267	1.15143e-14
cald1b	ENSDARG00000086391	563892	258.549	362.685	176.945	733.656	655.168	601.951	1.31859	0.00283189
calhm1	ENSDARG00000077021	100005176	47.7753	36.1707	56.7005	30.8502	21.4641	24.7513	-0.867137	0.320208
calhm2	ENSDARG00000039482	368657	123.654	130.019	110.468	254.514	593.841	447.503	1.83109	0.000106998
calhm3	ENSDARG00000079602	100005130	26.2296	26.3948	72.342	13.497	26.5747	25.7413	-0.92563	0.389776
calm1a	ENSDARG00000021811	406660	1253.4	1998.19	2839.91	2946.19	1832.63	2784.02	0.312194	0.652519
calm1b	ENSDARG00000034187	368217	986.42	751.764	1248.39	390.448	353.647	275.234	-1.55082	0.000121995
calm2a	ENSDARG00000111871	336121	1036.07	977.587	1200.49	1262.93	2136.19	2065.25	0.765584	0.0851724
calm2b	ENSDARG00000015050	192322	5372.38	6873.41	12226.8	5703.43	9097.73	6490.77	-0.200859	0.790982
calm3a	ENSDARG00000100825	327379	785.014	1214.16	2889.77	1783.53	1539.29	1231.62	-0.102197	0.920842
calm3b	ENSDARG00000074057	321808	4777.53	5235.95	8711.34	4398.08	8096.07	6854.12	0.047248	0.957903
calml4a	ENSDARG00000075800	560151	13.1148	42.0362	67.454	1.92814	8.17682	5.9403	-2.93802	0.00678285
calml4b	ENSDARG00000059347	100321746	13.1148	24.4397	9.77594	0	14.3094	6.93035	-1.15996	0.55677
caln1	ENSDARG00000088898	562420	45.9018	18.5741	15.6415	10.6047	1.0221	5.9403	-2.18463	0.0905352
caln2	ENSDARG00000069766	100007635	59.0166	28.35	103.625	37.5987	45.9946	10.8906	-1.01575	0.323548
calr	ENSDARG00000076290	325317	2032.79	2791.99	1688.3	979.493	2182.19	2331.57	-0.245719	0.747584
calr3a	ENSDARG00000103979	30248	1394.85	1785.07	1081.22	1020.95	2002.3	1979.11	0.231322	0.74882
calr3b	ENSDARG00000102808	321315	229.509	350.954	208.228	278.616	379.2	304.936	0.287659	0.67498
calua	ENSDARG00000045676	415241	763.468	661.826	497.595	1140.49	3933.05	2299.89	1.93897	0.000150443
calub	ENSDARG00000005115	394057	610.775	396.9	212.138	511.92	2662.58	1712.79	2.00219	0.00177788
caly	ENSDARG00000036008	100307104	40.2812	28.35	38.1262	48.2034	35.7736	24.7513	0.0265852	0.98535
camk1a	ENSDARG00000114234	555945	14.0516	12.7086	10.7535	10.6047	1.0221	1.9801	-1.45713	0.439616
camk1b	ENSDARG00000029474	794026	65.574	43.9914	69.4092	68.4488	137.984	67.3234	0.612263	0.452342
camk1da	ENSDARG00000111604	100144566	142.389	81.1397	53.7677	75.1973	79.724	73.2637	-0.281975	0.769025
camk1db	ENSDARG00000017446	791176	120.843	67.4535	89.9386	42.419	26.5747	23.7612	-1.58407	0.0139978
camk1ga	ENSDARG00000044526	335654	368.151	261.993	144.684	133.041	88.9229	115.836	-1.19759	0.0320948
camk1gb	ENSDARG00000008788	393802	326.933	188.674	142.729	47.2393	50.083	74.2538	-1.94031	0.000358735
camk2a	ENSDARG00000053617	550436	21.5457	60.6104	124.154	20.2454	4.08841	17.8209	-2.28782	0.018006
camk2b	ENSDARG00000100089	798222	15.9251	22.4845	7.82075	0	0	2.97015	-3.95896	0.0315053
camk2b1	ENSDARG00000011065	562064	1304.92	1050.91	2120.4	887.907	1717.13	1165.29	-0.247647	0.740358
camk2d1	ENSDARG00000043010	445208	299.767	203.338	301.099	199.562	265.747	256.423	-0.156359	0.834231
camk2d2	ENSDARG00000014273	436815	1406.09	780.114	2456.69	101.227	75.6356	54.4528	-4.32671	1.07294e-15
camk2g1	ENSDARG00000071395	791855	2099.3	1701.98	2356	2209.64	3487.41	2579.08	0.42663	0.409038
camk2g2	ENSDARG00000116258	793359	1322.72	1012.78	2107.69	1221.47	1624.12	1029.65	-0.19733	0.789788
camk2n1a	ENSDARG00000025855	553607	508.667	375.393	1059.71	147.502	89.945	83.1642	-2.59946	9.57025e-07
camk2n1b		100004137	8.43094	5.86552	0.977594	0	0	0	-4.80346	1
camk2n2	ENSDARG00000111102	436915	322.249	238.531	364.643	35.6705	58.2598	52.4727	-2.66124	1.00922e-08
camk4	ENSDARG00000005372	550270	133.958	88.9604	249.286	9.64068	26.5747	18.811	-3.10396	3.03936e-06
camkk1a	ENSDARG00000110417	541526	225.762	122.198	218.003	166.784	333.205	178.209	0.26049	0.758448
camkk1b	ENSDARG00000114689	100170786	323.186	175.966	99.7146	32.7783	72.5693	47.5224	-1.97134	0.0017734
camkva	ENSDARG00000027963	567243	9.36771	8.79828	17.5967	9.64068	2.0442	0.99005	-1.49083	0.441425
camkvb	ENSDARG00000117013	393422	29.0399	14.6638	68.4316	27.958	0	2.97015	-1.85383	0.242893
camkvl	ENSDARG00000057000	553431	409.369	195.517	170.101	73.2692	40.8841	64.3533	-2.11769	0.000138588
camlg	ENSDARG00000100409	404622	83.3726	59.6328	87.0059	84.838	58.2598	46.5324	-0.278127	0.76799
camsap1a	ENSDARG00000019208	402833	195.785	88.9604	118.289	45.3112	18.3978	26.7314	-2.15429	0.000673502
camsap1b	ENSDARG00000035122	561094	268.853	194.54	252.219	160.999	191.133	184.149	-0.416445	0.480269
camsap2a	ENSDARG00000111224	562741	198.595	180.854	161.303	137.862	116.52	79.204	-0.696832	0.228301
camsap2b		558673	116.16	105.579	73.3195	104.119	107.321	126.726	0.196425	0.817304
camsap3	ENSDARG00000059475	556256	352.226	323.581	345.091	185.101	160.47	99.9951	-1.19602	0.00938871
camta1	ENSDARG00000105435	101883062	19.6722	8.79828	3.91038	0	4.08841	6.93035	-1.55938	1
camta1a	ENSDARG00000116922	797322	475.88	297.186	694.092	88.6943	62.3482	118.806	-2.44242	1.03477e-06
camta1b	ENSDARG00000007824	497465	967.685	431.116	1507.45	128.221	116.52	103.955	-3.05904	3.92073e-09
camta2		101886599	59.9534	68.4311	76.2523	57.8441	25.5526	83.1642	-0.296091	0.783158
cand1	ENSDARG00000017841	406806	771.899	723.414	763.501	898.511	1388.01	1138.56	0.600491	0.18082
cand2	ENSDARG00000109268	555955	26.2296	15.6414	7.82075	17.3532	1.0221	12.8707	-0.667473	0.734184
cant1a	ENSDARG00000012192	406558	194.848	181.831	257.107	208.239	275.968	173.259	0.0527796	0.954365
cant1b	ENSDARG00000102977	445201	40.2812	25.4173	36.171	43.3831	30.6631	22.7712	-0.0731953	0.960482
canx	ENSDARG00000037488	406757	2438.42	2201.53	1784.11	1167.49	2262.93	2424.63	-0.133855	0.862761
cap1	ENSDARG00000016350	334527	350.352	532.785	566.027	353.813	381.244	431.662	-0.312655	0.611216
cap2	ENSDARG00000104478	393809	24.356	39.1035	36.171	40.4909	35.7736	37.6219	0.193822	0.875242
capga	ENSDARG00000113278	565410	5.62063	4.88793	5.86556	13.497	7.15472	13.8607	1.07654	0.544034
capgb	ENSDARG00000099672	336597	166.745	278.612	575.803	163.892	181.934	177.219	-0.965056	0.124804
capn10	ENSDARG00000076634	570311	37.4708	33.2379	12.7087	5.78441	50.083	8.91045	-0.367821	0.839535
capn12	ENSDARG00000116381	799247	33.7238	43.0138	27.3726	126.293	177.846	171.279	2.19097	2.24972e-05
capn15	ENSDARG00000060600	100330198	112.413	94.8259	75.2747	179.317	16.3536	77.2239	-0.049198	0.976114
capn1a	ENSDARG00000052702	393417	344.732	368.55	589.489	245.837	360.802	350.478	-0.444876	0.46505
capn1b	ENSDARG00000117045	565106	146.136	130.019	246.354	74.2332	50.083	55.4428	-1.53862	0.00447736
capn2a	ENSDARG00000091699	541374	14.0516	31.2828	25.4174	60.7363	22.4862	32.6717	0.714157	0.529115
capn2b	ENSDARG00000055592	563053	121.78	254.173	485.864	295.005	273.923	186.129	-0.190534	0.851592
capn3a	ENSDARG00000041864	447832	38.4076	52.7897	19.5519	25.0658	33.7294	12.8707	-0.628723	0.60095
capn3b	ENSDARG00000113539	100034405	43.0915	28.35	23.4623	6.74848	14.3094	25.7413	-1.02151	0.381118
[truncated: 25,599 more rows]

## Sheet: 2 pdgfrb-cit Ens95
ID	EnsemblGeneID	NCBI Gene ID	WTnegative08	WTnegative11	WTnegative14	WTpdgfrb01	WTpdgfrb06	WTpdgfrb09	log2FoldChange	padj
a1cf	ENSDARG00000002968	562916	9.31139	17.5637	17.5719	22.2863	1.02288	6.96024	-0.549915	0.789627
a2ml	ENSDARG00000056314	100006972	18.6228	43.9094	183.529	16.4725	12.2746	0.99432	-3.04718	0.00549193
aaas	ENSDARG00000102274	378454	246.752	445.924	337.771	148.252	306.865	334.092	-0.384879	0.60401
aacs	ENSDARG00000012468	393984	67.042	28.2971	37.0962	16.4725	18.4119	9.9432	-1.56413	0.0723856
aadac	ENSDARG00000063621	100148912	18.6228	15.6122	0.976215	18.4104	0	24.858	0.297385	0.913473
aadacl4	ENSDARG00000044802	569798	13.9671	13.6607	2.92865	9.6897	0	2.98296	-1.26504	0.583113
aadat	ENSDARG00000011410	557979	24.2096	59.5216	54.6681	44.5726	15.3433	72.5854	-0.0613875	0.968825
aagab	ENSDARG00000041170	436696	126.635	126.849	217.696	151.159	238.332	156.108	0.211499	0.801948
aak1a	ENSDARG00000011855	568999	60.524	44.8851	21.4767	10.6587	13.2975	15.9091	-1.67162	0.0588841
aak1b	ENSDARG00000077686	100534954	182.503	169.783	168.885	335.264	285.385	282.387	0.793036	0.0773758
aamdc	ENSDARG00000103957	553802	166.674	206.862	168.885	251.932	240.378	178.978	0.307643	0.640028
aamp	ENSDARG00000045019	405874	358.488	793.296	785.853	946.684	467.458	924.718	0.27171	0.740935
aanat1	ENSDARG00000036567	393677	52.1438	52.6912	19.5243	18.4104	4.09154	48.7217	-0.803593	0.55347
aanat2	ENSDARG00000079802	30685	57.7306	81.9641	79.0735	157.942	62.396	84.5172	0.479804	0.569712
aar2	ENSDARG00000018658	431768	99.6319	112.213	164.004	226.739	187.188	180.966	0.66293	0.239793
aars	ENSDARG00000069142	324940	860.372	1051.87	1024.05	1198.62	1179.39	1254.83	0.307144	0.548053
aars2	ENSDARG00000107385	100536819	67.9731	99.5279	91.7643	82.3624	106.38	89.4888	0.101987	0.914829
aarsd1	ENSDARG00000015747	445178	39.1078	27.3214	43.9297	10.6587	37.8467	14.9148	-0.801688	0.471972
aasdh	ENSDARG00000022730	570338	31.6587	14.6365	33.1913	14.5345	9.20596	21.875	-0.800797	0.514317
aasdhppt	ENSDARG00000037501	619247	72.6288	88.7945	92.7405	130.811	190.257	204.83	1.04912	0.041884
aass	ENSDARG00000051816	556229	178.779	157.098	199.148	273.25	191.279	147.159	0.193421	0.808075
aatf	ENSDARG00000025467	559477	123.841	206.862	224.53	209.298	197.417	199.858	0.127997	0.876893
aatka	ENSDARG00000078222	100004850	193.677	113.189	175.719	77.5176	98.1969	52.699	-1.07969	0.0602674
aatkb	ENSDARG00000104442	555739	135.946	122.946	92.7405	88.1763	123.769	96.4491	-0.189915	0.822909
abat	ENSDARG00000006031	378968	549.372	456.657	698.97	614.327	833.651	628.41	0.284247	0.644676
abca12	ENSDARG00000074749		231.854	467.391	1485.8	202.515	304.82	584.66	-1.00064	0.232138
abca1a	ENSDARG00000074635	558924	2336.23	2744.82	2432.73	7088.98	5788.5	4706.12	1.22664	0.000836523
abca1b	ENSDARG00000079009	100136868	283.066	644.98	537.895	1107.53	1492.39	1298.58	1.41125	0.00178527
abca2	ENSDARG00000013500	100006090	150.845	103.431	164.98	120.152	55.2358	46.7331	-0.915668	0.180356
abca3b	ENSDARG00000100524	564344	961.867	863.551	1328.63	1221.87	1523.07	1123.58	0.294573	0.619173
abca4a	ENSDARG00000057169	798993	148.051	82.9399	45.8821	46.5106	30.6865	73.5797	-0.877074	0.297406
abca4b	ENSDARG00000062661	555506	579.168	352.251	68.3351	119.183	58.3044	99.432	-1.85193	0.0130449
abca5	ENSDARG00000074041	100151075	327.761	362.008	386.581	501.926	367.216	411.649	0.25108	0.682742
abcb10	ENSDARG00000061591	100003744	95.9073	150.268	170.838	92.0521	180.028	84.5172	-0.226024	0.809652
abcb11a	ENSDARG00000011573	797269	27.9342	20.491	15.6194	14.5345	4.09154	10.9375	-1.11317	0.388633
abcb11b	ENSDARG00000070078	571189	49.3504	36.1032	92.7405	45.5416	22.5035	33.8069	-0.805633	0.371179
abcb4	ENSDARG00000010936	100136865	27.003	8.78187	35.1438	16.4725	18.4119	34.8012	-0.0259115	0.988882
abcb5	ENSDARG00000021787	798527	205.782	199.056	515.442	129.842	106.38	294.319	-0.794407	0.295465
abcb6a	ENSDARG00000063297	564067	14.8982	22.4426	5.85729	19.3794	1.02288	8.94888	-0.554467	0.79264
abcb6b	ENSDARG00000074254	100004801	8.38025	3.90305	1.95243	0	15.3433	1.98864	0.278042	1
abcb7	ENSDARG00000062795	566515	237.44	271.262	257.721	193.794	397.902	267.472	0.164541	0.836899
abcb8	ENSDARG00000056672	548340	154.569	179.54	126.908	48.4485	149.341	131.25	-0.487233	0.548976
abcb9	ENSDARG00000056200	570148	75.4223	47.8124	76.1448	22.2863	37.8467	25.8523	-1.21477	0.0880294
abcc1	ENSDARG00000104719	100002010	254.201	223.45	186.457	296.505	406.085	230.682	0.490576	0.404489
abcc10	ENSDARG00000077988	556709	136.877	96.6006	64.4302	79.4555	183.096	107.387	0.311361	0.74005
abcc12	ENSDARG00000013050	568482	14.8982	35.1275	59.5491	27.1312	13.2975	43.7501	-0.378672	0.788917
abcc13	ENSDARG00000062519	559093	96.8385	32.2002	48.8108	9.6897	16.3662	40.7671	-1.41341	0.133658
abcc2	ENSDARG00000014031	393561	41.9013	62.4489	176.695	32.945	16.3662	40.7671	-1.6402	0.0447304
abcc3	ENSDARG00000096662	323301	106.15	41.9578	39.0486	68.7969	123.769	112.358	0.70263	0.397557
abcc4	ENSDARG00000058953	368620	30.7276	31.2244	14.6432	84.3004	13.2975	26.8466	0.701138	0.585556
abcc5	ENSDARG00000061233	336147	499.09	425.433	274.317	608.513	790.69	578.694	0.722119	0.146388
abcc6a	ENSDARG00000016750	566555	69.8354	51.7155	30.2627	55.2313	170.822	147.159	1.29644	0.0694435
abcc6b.1	ENSDARG00000105403	110439293	20.4851	32.2002	29.2865	74.6107	6.13731	79.5456	0.968812	0.422811
abcc6b.2	ENSDARG00000094901	100002917	15.8294	34.1517	12.6908	11.6276	6.13731	4.9716	-1.4602	0.252623
abcc8	ENSDARG00000051879	553281	132.222	54.6428	167.909	139.532	58.3044	62.6422	-0.445166	0.64996
abcc8b	ENSDARG00000077007	100329706	138.74	96.6006	29.2865	49.4175	23.5263	45.7387	-1.15659	0.177035
abcc9	ENSDARG00000015985	561160	45.6258	20.491	17.5719	325.574	180.028	298.296	3.26134	6.40763e-09
abcd1	ENSDARG00000074876	566367	16.7605	21.4668	3.90486	7.75176	36.8238	12.9262	0.446327	0.810081
abcd2	ENSDARG00000059409	100537809	160.156	182.468	115.193	237.398	83.8765	133.239	-0.00992466	0.993098
ABCD2oneOfMany	ENSDARG00000099178		24.2096	20.491	12.6908	31.007	4.09154	10.9375	-0.315895	0.86412
abcd3a	ENSDARG00000104085	406803	371.524	429.336	649.183	273.25	546.22	366.904	-0.289649	0.69491
abcd3b	ENSDARG00000002947	100170781	42.8324	84.8914	5.85729	124.997	101.266	92.4718	1.25477	0.189437
abcd4	ENSDARG00000061770	767748	126.635	173.686	184.505	143.408	280.27	151.137	0.245465	0.768094
abce1	ENSDARG00000007216	406324	1195.58	2270.6	1631.26	1856.55	1753.22	1969.75	0.130419	0.856363
abcf1	ENSDARG00000031795	406467	739.324	1429.49	1411.61	1088.15	1101.65	1404.97	0.0058459	0.994037
abcf2a	ENSDARG00000038785	336770	552.165	993.327	581.824	710.255	799.896	1081.82	0.285071	0.675999
abcf2b	ENSDARG00000052331	100000576	44.6947	29.2729	51.7394	27.1312	39.8925	37.7842	-0.263078	0.818374
abcf3	ENSDARG00000089705	100331227	73.56	81.9641	55.6443	65.89	97.174	62.6422	0.095461	0.926585
abcg1	ENSDARG00000063475	556979	371.524	161.977	77.121	65.89	68.5333	49.716	-1.72997	0.01017
abcg2a	ENSDARG00000100075	735312	37.2456	58.5458	108.36	12.5966	9.20596	26.8466	-2.068	0.0105502
abcg2b	ENSDARG00000079361	570453	9.31139	10.7334	6.83351	4.84485	1.02288	7.95456	-0.957139	0.654573
abcg2c	ENSDARG00000058574	569858	276.548	342.493	255.768	427.316	661.806	441.478	0.806962	0.0862064
abcg2d	ENSDARG00000016818	735310	23.2785	20.491	8.78594	2.90691	1.02288	14.9148	-1.47932	0.367035
abcg4a	ENSDARG00000061047	564842	20.4851	10.7334	13.667	14.5345	1.02288	10.9375	-0.758168	0.682049
abcg4b	ENSDARG00000078068	794238	78.2157	91.7218	50.7632	21.3173	13.2975	10.9375	-2.27489	0.000892358
abcg5	ENSDARG00000063078	557317	8.38025	1.95153	10.7384	10.6587	0	6.96024	-0.255451	0.933699
abcg8	ENSDARG00000063059	100136850	24.2096	8.78187	13.667	3.87588	11.2517	1.98864	-1.4518	0.357332
abch1	ENSDARG00000071341	558667	16.7605	10.7334	10.7384	0	4.09154	1.98864	-2.66319	0.123104
abhd10a	ENSDARG00000076435	568517	172.261	120.019	208.91	253.87	421.428	204.83	0.812112	0.161359
abhd11	ENSDARG00000069501	446169	10.2425	6.83034	2.92865	6.78279	0	2.98296	-1.03024	1
abhd12	ENSDARG00000071004	767657	363.144	614.731	1057.24	774.207	867.406	838.212	0.285241	0.712193
abhd13	ENSDARG00000059209	561333	61.4552	34.1517	32.2151	50.3864	62.396	61.6479	0.447107	0.633807
abhd14a	ENSDARG00000058367	404598	41.9013	54.6428	31.2389	36.8209	52.1671	72.5854	0.338209	0.74767
abhd14b	ENSDARG00000100531	393338	64.2486	62.4489	111.289	92.0521	220.943	101.421	0.799977	0.27183
abhd15a	ENSDARG00000078768	560644	212.3	300.535	361.2	503.864	416.314	461.365	0.660811	0.18226
abhd16a	ENSDARG00000078929	564613	467.432	386.402	471.512	278.094	394.833	297.302	-0.450187	0.396574
abhd17aa	ENSDARG00000091433	322121	62.3863	64.4004	35.1438	69.7658	59.3273	88.4945	0.426019	0.628902
abhd17ab	ENSDARG00000043084	100003419	23.2785	25.3699	5.85729	18.4104	2.04577	21.875	-0.363513	0.855784
abhd17b	ENSDARG00000035571	437017	266.306	275.165	275.293	624.017	634.188	433.524	1.05052	0.0107031
abhd17c	ENSDARG00000058452	393126	560.546	442.021	668.708	489.33	612.708	488.211	-0.071771	0.924385
abhd18	ENSDARG00000101961	503769	138.74	129.777	126.908	106.587	192.302	169.034	0.242389	0.758375
abhd2a	ENSDARG00000025797	393888	144.327	132.704	162.052	337.202	161.616	225.711	0.722917	0.206949
abhd2b	ENSDARG00000045804	559290	244.89	103.431	168.885	94.9591	106.38	32.8126	-1.14373	0.103104
abhd3	ENSDARG00000018809	447830	372.456	372.742	721.423	314.915	335.506	397.728	-0.484564	0.427789
abhd4	ENSDARG00000102887	550276	208.575	189.298	224.53	820.718	567.701	339.063	1.47283	0.00182242
abhd5b	ENSDARG00000100388	100329433	20.4851	6.83034	0.976215	13.5656	4.09154	8.94888	-0.0898633	0.974213
abhd6a	ENSDARG00000060756	799085	417.15	384.451	201.1	74.6107	23.5263	30.8239	-2.95708	4.70502e-07
abhd6b	ENSDARG00000070894	558995	17.6916	24.3941	11.7146	31.976	36.8238	33.8069	0.931283	0.340678
abhd8a	ENSDARG00000103518		17.6916	3.90305	4.88108	10.6587	0	2.98296	-0.953761	0.714261
abhd8b	ENSDARG00000076620	101883400	81.0091	68.3034	41.9773	62.0141	55.2358	97.4434	0.166106	0.876551
abi1a	ENSDARG00000010155	393711	498.159	532.767	549.609	1253.85	1001.4	845.172	0.972124	0.0140838
abi1b	ENSDARG00000062991	767738	247.683	230.28	494.941	58.1382	86.9452	57.6706	-2.26304	9.46029e-06
abi2a	ENSDARG00000058207	767646	98.7007	102.455	61.5016	52.3244	151.387	110.37	0.257095	0.798596
abi2b	ENSDARG00000014875	692331	134.084	116.116	131.789	127.904	177.982	205.824	0.421508	0.515604
abi3a	ENSDARG00000060072	767807	213.231	263.456	593.539	22.2863	66.4875	36.7899	-3.09295	4.0908e-07
abi3b	ENSDARG00000063283	566059	40.039	112.213	168.885	30.0381	9.20596	48.7217	-1.86668	0.0262058
abi3bpa	ENSDARG00000062156	101884149	48.4192	176.613	128.86	433.13	109.449	329.12	1.30125	0.0777087
abi3bpb	ENSDARG00000071095	100149890	2301.78	4137.24	2939.38	4345.83	10369	7917.77	1.27099	0.00859746
abl1	ENSDARG00000035187	100000720	74.4911	57.57	20.5005	129.842	49.0985	72.5854	0.721123	0.445174
abl2	ENSDARG00000013841	570636	194.608	243.941	227.458	204.453	192.302	207.813	-0.139443	0.847759
ablim1a	ENSDARG00000060149	100003558	221.611	36.1032	150.337	6.78279	48.0756	47.7274	-1.99347	0.0283734
ablim1b	ENSDARG00000045064	541550	1322.22	1614.89	2110.58	4062.89	5873.4	3879.84	1.45268	0.00025905
ablim2	ENSDARG00000055223	568454	77.2845	45.8609	128.86	60.0761	41.9383	51.7047	-0.712581	0.379968
ablim3	ENSDARG00000088168	566821	721.633	344.445	288.96	226.739	208.668	206.819	-1.07738	0.0444812
abo	ENSDARG00000019207	563897	9.31139	6.83034	1.95243	6.78279	1.02288	1.98864	-0.88229	1
abr	ENSDARG00000095180	565190	16.7605	27.3214	10.7384	45.5416	27.6179	14.9148	0.684976	0.588435
abraa	ENSDARG00000038583	324520	54.9372	59.5216	47.8346	28.1001	25.5721	25.8523	-1.02894	0.161384
abrab	ENSDARG00000033854	445477	129.428	64.4004	67.3589	102.711	20.4577	57.6706	-0.529702	0.617678
abracl	ENSDARG00000042876	336650	275.617	311.269	630.635	288.753	298.682	282.387	-0.485014	0.455284
abraxas1	ENSDARG00000043339	449820	70.7666	89.7702	102.503	134.687	127.861	99.432	0.461066	0.500729
abraxas2	ENSDARG00000098907	406584	56.7995	57.57	40.0248	88.1763	87.9681	43.7501	0.509925	0.553293
abt1	ENSDARG00000043666	553568	105.219	159.049	156.194	128.873	83.8765	141.193	-0.247792	0.764422
abtb1	ENSDARG00000063354	100536189	172.261	246.868	271.388	290.691	320.163	297.302	0.395482	0.501264
abtb2a	ENSDARG00000059751	559451	90.3205	71.2307	60.5254	218.018	352.895	319.177	2.00214	1.12321e-05
abtb2b	ENSDARG00000062000	100007078	138.74	152.219	114.217	402.123	703.745	355.967	1.85096	4.87565e-05
acaa1	ENSDARG00000004687	431754	73.56	122.946	219.648	80.4245	212.76	196.875	0.235893	0.823729
acaa2	ENSDARG00000038881	406325	338.935	419.578	388.534	183.135	724.202	629.405	0.421819	0.608723
acaca	ENSDARG00000078512	559403	529.818	644.004	810.259	521.306	541.106	503.126	-0.341738	0.537593
acacb	ENSDARG00000061994	556236	215.093	176.613	148.385	270.343	505.305	394.745	1.11529	0.0192748
acad11	ENSDARG00000045411	393147	56.7995	92.6975	104.455	93.0211	94.1054	91.4775	0.134268	0.886657
acad8	ENSDARG00000042658	394130	170.398	194.177	275.293	190.887	265.95	282.387	0.208286	0.783967
acad9	ENSDARG00000055620	724002	107.081	78.0611	123.979	105.618	148.318	116.335	0.260039	0.748611
acadl	ENSDARG00000088357	394156	486.055	418.603	624.778	560.065	867.406	706.962	0.480784	0.36824
acadm	ENSDARG00000038900	406283	848.268	926	1269.08	1961.2	2361.84	1834.52	1.01673	0.010457
acads	ENSDARG00000030781	445288	132.222	192.225	314.341	165.694	334.483	286.364	0.300236	0.722585
acadsb	ENSDARG00000076780	110437777	211.369	443.972	567.181	455.416	255.721	390.768	-0.149513	0.871465
acadvl	ENSDARG00000016687	573723	564.27	701.574	759.496	648.241	904.23	780.541	0.204027	0.749348
acana	ENSDARG00000035891	497505	181.572	147.34	80.0497	4523.15	2581.76	3228.56	4.65876	1.31836e-22
acanb	ENSDARG00000045799	559593	32.5899	24.3941	5.85729	291.66	87.9681	198.864	3.20072	9.19631e-06
acap1	ENSDARG00000056346	561771	68.9043	150.268	213.791	81.3935	84.8994	73.5797	-0.851529	0.216948
acap2	ENSDARG00000060783	100124613	58.6618	82.9399	47.8346	118.214	97.174	90.4831	0.691562	0.301353
acap3a	ENSDARG00000075990	322991	45.6258	34.1517	8.78594	51.3554	40.9154	18.8921	0.327013	0.822909
acap3b	ENSDARG00000099240	100009646	29.7964	18.5395	27.334	45.5416	4.09154	17.8978	-0.162254	0.929662
acat1	ENSDARG00000045888	445290	588.48	406.893	476.393	502.895	825.468	646.308	0.423849	0.452315
acat2	ENSDARG00000007127	30643	225.336	197.104	278.221	89.1452	249.584	137.216	-0.558495	0.430854
acbd3	ENSDARG00000042623	406270	455.327	435.191	662.85	524.213	753.866	565.768	0.247286	0.707725
acbd4	ENSDARG00000027070	406368	24.2096	22.4426	54.6681	29.0691	41.9383	20.8807	-0.140967	0.922481
acbd5a	ENSDARG00000034883	553674	214.162	99.5279	156.194	77.5176	159.57	108.381	-0.444645	0.573625
acbd5b	ENSDARG00000058410	100004736	12.1048	0.975763	1.95243	4.84485	0	0	-1.62793	1
acbd6	ENSDARG00000039456	324090	208.575	199.056	195.243	241.274	269.019	191.904	0.219888	0.750005
acbd7	ENSDARG00000094730	619256	306.345	359.081	500.799	17.4415	47.0527	110.37	-2.73796	2.1469e-05
accs	ENSDARG00000052124	541510	184.366	153.195	141.551	73.6417	169.799	96.4491	-0.496177	0.492583
acd	ENSDARG00000078055	794664	154.569	143.437	177.671	141.47	191.279	152.131	0.0274239	0.976508
ace	ENSDARG00000079166	565980	135.946	223.45	142.527	384.681	573.838	531.961	1.57038	0.000340931
ace2	ENSDARG00000016918	492331	6.51797	24.3941	189.386	36.8209	0	14.9148	-2.08948	0.531609
acer1	ENSDARG00000010347	550266	24.2096	11.7092	31.2389	6.78279	16.3662	17.8978	-0.711912	0.609719
acer2	ENSDARG00000077782	100331179	7.44911	1.95153	0.976215	15.5035	0	2.98296	0.832221	1
acer3	ENSDARG00000093366	555411	9.31139	10.7334	9.76215	6.78279	11.2517	7.95456	-0.198751	0.925669
ache	ENSDARG00000031796	114549	842.681	428.36	1274.94	218.987	376.421	264.489	-1.56617	0.00271832
acin1a	ENSDARG00000054290	368893	6503.07	7822.7	5458.02	8640.31	9057.64	8354.28	0.397088	0.404294
acin1b	ENSDARG00000026842	327495	1129.47	1178.72	1097.27	951.529	1179.39	1294.61	0.00844195	0.991094
ACKR2	ENSDARG00000086314	101887081	20.4851	20.491	9.76215	4.84485	13.2975	14.9148	-0.62032	0.701075
ackr3a	ENSDARG00000062478	100000764	36.3144	34.1517	18.5481	38.7588	73.6477	80.5399	1.11487	0.153313
ackr3b	ENSDARG00000058179	561050	899.48	1463.65	1289.58	3703.4	7040.51	4260.66	2.0384	1.42836e-06
ackr4a	ENSDARG00000078729	100003167	6.51797	14.6365	3.90486	2.90691	8.18308	21.875	0.395636	0.863529
ackr4b	ENSDARG00000040133	641390	54.0061	59.5216	75.1686	202.515	158.547	235.654	1.66153	0.00045944
aclya	ENSDARG00000099079	436922	280.273	304.438	457.845	245.149	356.987	333.097	-0.156753	0.838355
aclyb	ENSDARG00000055652	794259	38.1767	44.8851	61.5016	75.5797	92.0596	45.7387	0.561963	0.505221
acmsd	ENSDARG00000062549	557166	8.38025	17.5637	31.2389	2.90691	0	14.9148	-1.67987	0.335094
aco1	ENSDARG00000026376	568448	61.4552	75.1338	61.5016	83.3314	129.906	170.029	0.952088	0.116874
aco2	ENSDARG00000007294	322670	1724.47	1528.05	1959.26	941.839	1582.4	1631.68	-0.326658	0.581779
acod1	ENSDARG00000069844	795305	24.2096	57.57	1.95243	4.84485	8.18308	5.96592	-2.1415	0.127907
acot11a	ENSDARG00000058229	554842	12.1048	13.6607	13.667	19.3794	15.3433	4.9716	0.0102985	0.995211
acot11b	ENSDARG00000042122	641574	18.6228	14.6365	4.88108	27.1312	22.5035	0	0.379311	0.872914
ACOT12	ENSDARG00000054534	100536873	59.5929	142.461	232.339	288.753	118.655	170.029	0.411428	0.669745
acot13	ENSDARG00000061728	564010	54.9372	88.7945	155.218	89.1452	77.7392	71.5911	-0.325339	0.73118
acot14	ENSDARG00000089159	557184	121.048	142.461	151.313	238.367	546.22	243.608	1.30942	0.0133019
acot15	ENSDARG00000045522	557032	158.294	152.219	217.696	664.713	803.987	386.791	1.81269	6.20993e-05
acot16	ENSDARG00000069292	402867	12.1048	4.87882	18.5481	11.6276	2.04577	6.96024	-0.780932	0.693602
acot17	ENSDARG00000088524	572757	22.3473	7.80611	10.7384	0	9.20596	8.94888	-1.17594	0.549839
acot18	ENSDARG00000033413	556673	70.7666	92.6975	107.384	90.1142	151.387	141.193	0.498732	0.477497
acot19	ENSDARG00000040427	492778	7.44911	7.80611	8.78594	7.75176	1.02288	2.98296	-1.02676	1
acot20	ENSDARG00000042510	553440	21.4162	13.6607	23.4292	51.3554	11.2517	19.8864	0.497179	0.733098
acot21	ENSDARG00000042513	562047	12.1048	6.83034	3.90486	0.96897	0	2.98296	-2.52824	1
acot22	ENSDARG00000058945	553217	19.5539	14.6365	5.85729	5.81382	4.09154	14.9148	-0.690801	0.710935
acot7	ENSDARG00000018653	447878	22.3473	14.6365	50.7632	32.945	16.3662	20.8807	-0.320431	0.826837
acot8	ENSDARG00000014138	450052	37.2456	21.4668	46.8583	91.0832	48.0756	27.841	0.662188	0.516896
acot9.1	ENSDARG00000058352	798073	175.985	139.534	238.197	157.942	495.076	274.432	0.74385	0.273135
acot9.2	ENSDARG00000058390	798008	12.1048	10.7334	21.4767	8.72073	8.18308	3.97728	-1.08496	0.476265
acox1	ENSDARG00000014727	449662	468.363	393.233	571.086	679.248	1069.94	686.081	0.765282	0.105976
acox3	ENSDARG00000038865	406421	46.5569	47.8124	57.5967	161.818	180.028	64.6308	1.41952	0.0226294
acoxl	ENSDARG00000020149	569104	21.4162	3.90305	12.6908	24.2242	2.04577	2.98296	-0.375834	0.876469
acp1	ENSDARG00000076486	541489	185.297	227.353	253.816	222.863	234.241	243.608	0.0724521	0.926517
acp2	ENSDARG00000007244	503759	61.4552	54.6428	22.453	36.8209	133.998	102.415	0.978463	0.259508
acp5a	ENSDARG00000019763	406801	36.3144	150.268	70.2875	25.1932	66.4875	45.7387	-0.90285	0.327268
acp5b	ENSDARG00000101456	436725	15.8294	62.4489	14.6432	33.9139	26.595	25.8523	-0.104368	0.949222
acp6	ENSDARG00000040064	558758	45.6258	45.8609	42.9535	37.7898	68.5333	29.8296	0.0172683	0.989778
acp7	ENSDARG00000102421	571830	17.6916	28.2971	16.5957	51.3554	9.20596	29.8296	0.532349	0.704563
acsbg1	ENSDARG00000062077	100006023	13.9671	3.90305	8.78594	9.6897	0	0	-1.45413	1
acsbg2	ENSDARG00000004094	335159	933.001	891.848	1381.34	402.123	762.049	445.456	-0.994273	0.0392929
acsf2	ENSDARG00000061201	751707	231.854	356.154	313.365	405.029	1316.45	919.746	1.55102	0.00333249
ACSF3	ENSDARG00000059503	562292	45.6258	81.9641	66.3827	28.1001	65.4646	46.7331	-0.467957	0.624552
acsl1a	ENSDARG00000030514	555308	298.896	374.693	463.702	235.46	412.222	331.109	-0.216625	0.769837
acsl1b	ENSDARG00000003854	445175	259.788	358.105	365.105	464.137	484.847	439.49	0.498398	0.320702
acsl2	ENSDARG00000078399	100332846	189.021	237.111	172.79	26.1622	19.4348	21.875	-3.14883	1.74835e-10
acsl3a	ENSDARG00000032079	567157	17.6916	22.4426	4.88108	5.81382	0	0	-2.94046	0.125616
acsl3b	ENSDARG00000014674	559656	1016.8	905.509	1194.89	839.128	792.735	709.945	-0.412607	0.396956
acsl4a	ENSDARG00000004078	393622	789.606	325.905	391.462	588.165	890.932	419.603	0.333097	0.680279
acsl4b	ENSDARG00000010752	334561	308.207	472.27	337.771	653.086	903.207	647.303	0.978664	0.0253289
acsl5	ENSDARG00000075931	447860	12.1048	7.80611	33.1913	20.3484	9.20596	5.96592	-0.577718	0.743882
acsm3	ENSDARG00000004880	100002035	138.74	126.849	97.6215	367.24	765.118	346.023	2.02475	3.18841e-05
acss1	ENSDARG00000044142	541435	158.294	256.626	166.933	323.636	462.344	243.608	0.823379	0.131168
acss2	ENSDARG00000037781	436914	531.68	439.094	586.706	189.918	450.069	508.098	-0.440178	0.525656
acss2l	ENSDARG00000069029	560020	12.1048	24.3941	5.85729	17.4415	0	18.8921	-0.219212	0.930492
acss3	ENSDARG00000032218	566019	329.623	264.432	436.368	183.135	162.639	170.029	-0.99822	0.0289941
acta1a	ENSDARG00000036371	550445	535.405	615.707	269.435	798.431	936.962	612.501	0.724836	0.191097
acta1b	ENSDARG00000055618	407658	160.156	88.7945	260.65	274.219	574.861	139.205	0.955413	0.211231
acta2	ENSDARG00000045180	322509	179.71	304.438	267.483	4430.13	4056.76	4730.98	4.13664	5.30161e-26
actb1	ENSDARG00000037746	57934	27910	33445.3	17710.5	47549.3	90464.9	57682.5	1.30749	0.00383415
actb2	ENSDARG00000037870	57935	49969.6	73745.3	69978.1	179175	176795	130548	1.32873	0.000408801
actc1a	ENSDARG00000042535	408256	910.654	1551.46	1529.73	329.45	1044.37	263.495	-1.28589	0.0432162
actc1b	ENSDARG00000099197	58114	1397.64	1875.42	2915.96	1811	3401.09	2073.16	0.235269	0.760293
actc1c	ENSDARG00000079111	415164	69.8354	88.7945	242.101	72.6727	132.975	134.233	-0.237508	0.828372
actl6a	ENSDARG00000070828	192313	576.375	614.731	980.12	485.454	693.516	605.541	-0.282997	0.666103
actl6b	ENSDARG00000034107	553775	12.1048	11.7092	45.8821	5.81382	4.09154	0	-2.81221	0.0502304
actn1	ENSDARG00000007219	560400	473.019	1000.16	901.047	2388.51	3215.95	2544.47	1.77925	3.04531e-05
actn2b	ENSDARG00000071090	641575	118.255	75.1338	67.3589	68.7969	30.6865	17.8978	-1.15055	0.150884
actn3a	ENSDARG00000013755	58037	68.9043	54.6428	95.6691	57.1692	115.586	59.6592	0.0837023	0.940954
actn3b	ENSDARG00000001431	323320	132.222	115.14	115.193	99.8039	270.042	118.324	0.428506	0.59978
actn4	ENSDARG00000099786	322221	187.159	162.953	157.171	191.856	301.751	245.597	0.542791	0.33002
actr1	ENSDARG00000011611	406681	1068.95	1299.72	1753.28	1214.12	1723.56	1515.34	0.111466	0.877856
actr10	ENSDARG00000038432	393139	352.902	192.225	283.102	220.925	567.701	479.262	0.613968	0.354376
actr2a	ENSDARG00000052438	406820	768.19	922.097	1255.41	1006.76	1148.7	1012.22	0.104857	0.882102
actr2b	ENSDARG00000070076	554861	30.7276	24.3941	16.5957	6.78279	36.8238	21.875	-0.133894	0.938408
actr3	ENSDARG00000091138	406250	24.2096	15.6122	13.667	7.75176	26.595	15.9091	-0.0929408	0.960199
actr3b	ENSDARG00000008790	100038776	8.38025	1.95153	3.90486	5.81382	5.11442	1.98864	-0.142754	1
actr5	ENSDARG00000098235	406809	70.7666	76.1096	61.5016	164.725	165.707	65.6251	0.926448	0.163195
actr6	ENSDARG00000021370	324822	137.809	168.807	246.006	122.09	222.989	252.557	0.112958	0.903986
actr8	ENSDARG00000103610	326866	142.464	146.365	175.719	125.966	208.668	108.381	-0.0687996	0.941427
acvr1ba	ENSDARG00000018968	30183	1666.74	1185.55	1561.94	315.884	638.28	539.916	-1.5631	0.000264607
acvr1bb	ENSDARG00000052142	559222	33.521	24.3941	17.5719	2.90691	8.18308	20.8807	-1.24109	0.339822
ACVR1C	ENSDARG00000086172	100331105	59.5929	57.57	19.5243	15.5035	4.09154	22.8694	-1.6851	0.0956882
acvr1l	ENSDARG00000014986	30615	495.366	372.742	429.535	313.946	672.035	509.092	0.204065	0.787919
acvr2aa	ENSDARG00000011188	553359	1554.07	1433.4	1546.33	1272.26	1489.32	1288.64	-0.162751	0.783443
acvr2ab	ENSDARG00000104700	100331014	27.003	36.1032	5.85729	13.5656	15.3433	4.9716	-1.02609	0.47742
acvr2ba	ENSDARG00000044422	30457	78.2157	51.7155	28.3102	63.952	45.0069	43.7501	-0.051845	0.968825
acvr2bb	ENSDARG00000103108	100331938	26.0719	28.2971	41.9773	23.2553	11.2517	12.9262	-1.0201	0.319735
acvrl1	ENSDARG00000018179	266753	173.192	288.826	314.341	993.194	1243.83	758.666	1.94834	5.73108e-06
acy1	ENSDARG00000111129	100001620	193.677	184.419	268.459	173.446	240.378	215.768	-0.0384549	0.965237
acy3.1	ENSDARG00000093003	791456	13.9671	61.4731	66.3827	62.0141	34.7781	44.7444	-0.00120198	0.998839
acy3.2	ENSDARG00000005525	436619	163.88	287.85	277.245	398.247	205.6	256.535	0.239611	0.767908
acyp1	ENSDARG00000060126	571263	131.291	96.6006	180.6	275.187	177.982	112.358	0.469574	0.540319
acyp2	ENSDARG00000086271	101886626	8.38025	40.9821	6.83351	3.87588	0	22.8694	-1.06978	0.616154
ada	ENSDARG00000003113	436919	106.15	103.431	208.91	38.7588	227.08	108.381	-0.161824	0.897832
ada2a	ENSDARG00000051746	373884	229.991	184.419	170.838	215.111	395.856	267.472	0.585434	0.309152
ada2b	ENSDARG00000015623	559295	21.4162	38.0548	25.3816	4.84485	4.09154	1.98864	-2.95586	0.00520613
adad1	ENSDARG00000089181	564818	25.1408	20.491	14.6432	0	1.02288	11.9318	-2.21884	0.172288
adad2	ENSDARG00000105626	558824	6.51797	10.7334	3.90486	6.78279	1.02288	0	-1.43206	1
adal	ENSDARG00000012986	619263	47.4881	44.8851	74.1924	62.983	65.4646	53.6933	0.129251	0.903657
adam10a	ENSDARG00000053468	566044	1264.49	1612.94	1732.78	2194.72	3348.92	2750.29	0.847232	0.0419275
adam10b	ENSDARG00000015502	393392	40.039	34.1517	14.6432	51.3554	18.4119	21.875	0.0454842	0.978788
adam11	ENSDARG00000079204	567145	32.5899	17.5637	24.4054	0	2.04577	2.98296	-3.89908	0.00213875
adam12	ENSDARG00000079068	563275	91.2516	152.219	141.551	245.149	308.911	218.75	1.0055	0.0434988
ADAM12oneOfMany	ENSDARG00000116062	101884222	8.38025	15.6122	2.92865	4.84485	13.2975	8.94888	0.0075278	0.997205
adam15	ENSDARG00000089213	795199	145.258	140.51	92.7405	81.3935	106.38	108.381	-0.354461	0.636316
adam17a	ENSDARG00000043213	324142	440.429	462.512	630.635	433.13	862.292	547.87	0.265294	0.708852
adam17b	ENSDARG00000093093	560657	32.5899	41.9578	14.6432	39.7278	11.2517	49.716	0.175791	0.910995
adam19a	ENSDARG00000059693		200.195	328.832	318.246	1267.41	1096.53	627.416	1.82013	5.35468e-05
adam19b	ENSDARG00000067545	571252	175.985	116.116	185.481	112.401	199.462	127.273	-0.121633	0.892815
adam22	ENSDARG00000060532	100126805	446.016	142.461	533.99	53.2933	11.2517	32.8126	-3.52517	3.01153e-07
adam23a	ENSDARG00000062323	794175	527.025	325.905	814.164	62.0141	19.4348	37.7842	-3.80349	3.64654e-11
adam28	ENSDARG00000035514	767749	76.3534	131.728	69.3113	40.6967	79.785	49.716	-0.705378	0.359147
adam8a	ENSDARG00000001452	368917	213.231	184.419	62.4778	1859.45	1417.72	1104.69	3.25107	6.00133e-10
adam8b	ENSDARG00000057644	100005593	76.3534	84.8914	18.5481	81.3935	173.89	115.341	1.04284	0.199043
adam9	ENSDARG00000010070	447940	59.5929	61.4731	19.5243	119.183	94.1054	80.5399	1.06302	0.147897
adamts1	ENSDARG00000103519	565145	35.3833	20.491	12.6908	19.3794	149.341	65.6251	1.77084	0.0588632
adamts10	ENSDARG00000075188	564734	27.003	15.6122	20.5005	52.3244	16.3662	47.7274	0.88338	0.400104
adamts12	ENSDARG00000067549	100003937	151.776	180.516	123.003	792.617	1211.1	778.553	2.61131	1.53694e-10
adamts13	ENSDARG00000076270	100320289	17.6916	13.6607	21.4767	9.6897	6.13731	9.9432	-1.03441	0.441483
adamts14	ENSDARG00000078494	101886422	12.1048	21.4668	3.90486	16.4725	5.11442	7.95456	-0.341023	0.872519
adamts15a	ENSDARG00000029124	569571	102.425	142.461	109.336	288.753	301.751	153.125	1.07009	0.0431983
adamts15b	ENSDARG00000058252	100001991	96.8385	84.8914	122.027	135.656	247.538	158.097	0.833189	0.147897
adamts16	ENSDARG00000074646	568792	29.7964	11.7092	10.7384	15.5035	8.18308	24.858	-0.10701	0.955954
adamts17	ENSDARG00000075555	101884120	14.8982	17.5637	22.453	22.2863	18.4119	27.841	0.320716	0.819578
adamts18	ENSDARG00000001999	100150128	431.117	442.021	320.199	134.687	261.858	208.807	-0.979589	0.0467569
adamts2	ENSDARG00000075930	571682	126.635	189.298	88.8356	193.794	507.351	295.313	1.29952	0.0248336
adamts3	ENSDARG00000060127	102467218	28.8653	34.1517	17.5719	158.911	75.6935	92.4718	2.02117	0.00120645
adamts5	ENSDARG00000100307	565053	40.039	25.3699	26.3578	48.4485	20.4577	31.8183	0.134765	0.922964
adamts6	ENSDARG00000041982	569099	20.4851	45.8609	18.5481	31.007	48.0756	41.7615	0.509659	0.650164
ADAMTS7	ENSDARG00000102478	560364	36.3144	50.7397	27.334	70.7348	77.7392	71.5911	0.944032	0.173073
adamts8a	ENSDARG00000007709	569618	34.4521	22.4426	8.78594	16.4725	34.7781	11.9318	-0.0585862	0.975739
adamts9	ENSDARG00000077778	100333407	305.414	372.742	289.936	752.89	1263.26	988.354	1.63387	4.05764e-05
adamtsl2	ENSDARG00000074033	100537087	385.492	903.557	80.0497	394.371	466.435	790.485	0.270387	0.828547
adamtsl3	ENSDARG00000027903	100534944	107.081	163.928	75.1686	253.87	291.522	310.228	1.30552	0.00841879
adamtsl5	ENSDARG00000052118	101886605	41.9013	61.4731	103.479	33.9139	151.387	102.415	0.475856	0.655422
adamtsl7	ENSDARG00000055439	556634	32.5899	40.9821	22.453	114.338	56.2586	84.5172	1.41017	0.0343964
adap2	ENSDARG00000070565	100331455	20.4851	38.0548	25.3816	6.78279	5.11442	1.98864	-2.59339	0.0150154
adar	ENSDARG00000012389	58119	162.018	121.97	123.003	127.904	147.295	109.375	-0.0821776	0.925584
adarb1a	ENSDARG00000041609	58134	287.722	298.584	431.487	119.183	113.54	145.171	-1.42923	0.00104631
adarb1b	ENSDARG00000003544	558759	47.4881	27.3214	29.2865	36.8209	15.3433	23.8637	-0.452647	0.706846
adarb2	ENSDARG00000071823	558149	38.1767	21.4668	8.78594	9.6897	19.4348	15.9091	-0.606334	0.681668
adat1	ENSDARG00000061348	792614	50.2815	47.8124	40.0248	51.3554	75.6935	62.6422	0.456992	0.588435
adat2	ENSDARG00000041944	100034610	73.56	91.7218	78.0972	62.983	61.3731	60.6535	-0.395377	0.609602
adat3	ENSDARG00000005640	368634	32.5899	39.0305	77.121	40.6967	59.3273	29.8296	-0.195837	0.874091
adck1	ENSDARG00000062561	100144553	37.2456	32.2002	16.5957	17.4415	32.7323	28.8353	-0.124733	0.932412
adck2	ENSDARG00000073923	572087	67.9731	39.0305	18.5481	22.2863	15.3433	35.7955	-0.774482	0.484219
adck5	ENSDARG00000075405	100001584	67.9731	124.898	108.36	73.6417	83.8765	92.4718	-0.268615	0.756352
adcy1a	ENSDARG00000069026	557026	35.3833	18.5395	32.2151	22.2863	4.09154	6.96024	-1.36605	0.252331
adcy1b	ENSDARG00000088634	569499	30.7276	21.4668	8.78594	10.6587	0	7.95456	-1.70842	0.276505
adcy2a	ENSDARG00000058392	563724	54.9372	27.3214	35.1438	24.2242	45.0069	45.7387	-0.0318947	0.982048
adcy2b	ENSDARG00000014588	557902	148.051	108.31	208.91	87.2073	73.6477	80.5399	-0.946409	0.0958464
adcy3a	ENSDARG00000077145	571825	24.2096	21.4668	13.667	13.5656	8.18308	22.8694	-0.411265	0.791765
adcy3b	ENSDARG00000017437	564719	24.2096	6.83034	14.6432	12.5966	0	4.9716	-1.37479	0.463184
adcy5	ENSDARG00000091342	562619	57.7306	36.1032	49.787	49.4175	58.3044	34.8012	-0.011843	0.992917
adcy6a	ENSDARG00000061445	570652	172.261	129.777	157.171	403.092	219.92	228.694	0.891316	0.0922158
adcy6b	ENSDARG00000027797	560807	36.3144	45.8609	24.4054	47.4795	33.7552	55.6819	0.361698	0.738469
adcy7	ENSDARG00000060070	568726	367.8	352.251	392.439	706.379	857.177	654.263	0.995305	0.0105401
adcy8	ENSDARG00000031783	100148976	107.081	31.2244	105.431	15.5035	4.09154	1.98864	-3.4916	0.000129387
adcy9	ENSDARG00000100869	100333702	41.9013	38.0548	41.9773	38.7588	30.6865	49.716	-0.0329026	0.980327
adcyap1a	ENSDARG00000004015	259257	39.1078	34.1517	133.742	20.3484	5.11442	25.8523	-2.01001	0.032235
adcyap1b	ENSDARG00000027740	335625	940.45	644.004	2230.65	258.715	119.677	79.5456	-3.05808	7.05541e-07
adcyap1r1a	ENSDARG00000053724	555473	749.567	368.839	1491.66	65.89	12.2746	52.699	-4.31639	6.67669e-10
add1	ENSDARG00000103962	555511	231.854	219.547	130.813	259.684	559.518	414.632	1.08315	0.0411552
add2	ENSDARG00000074581	570147	476.743	172.71	429.535	79.4555	43.984	27.841	-2.83356	1.78499e-06
add3a	ENSDARG00000040874	556762	975.834	1676.36	1409.66	3677.24	3995.39	3372.73	1.44329	0.000161206
add3b	ENSDARG00000056250	553243	30.7276	58.5458	109.336	324.605	173.89	200.853	1.81726	0.0028019
adgb	ENSDARG00000005595	555435	120.117	61.4731	103.479	31.007	12.2746	5.96592	-2.53052	0.000799058
adgra1a	ENSDARG00000054177	560847	212.3	121.97	177.671	47.4795	8.18308	22.8694	-2.70171	6.02898e-05
adgra2	ENSDARG00000076994	560700	80.0779	126.849	54.6681	170.539	184.119	192.898	1.06578	0.0581671
adgra3	ENSDARG00000073673		241.165	318.099	270.412	984.474	928.779	778.553	1.6981	4.35578e-06
adgrb1a	ENSDARG00000075133	563527	674.145	251.747	744.852	128.873	82.8536	119.318	-2.33511	8.76656e-06
adgrb1b	ENSDARG00000078529	100302472	455.327	325.905	852.236	58.1382	20.4577	45.7387	-3.71397	9.30828e-11
adgrb2	ENSDARG00000025667		95.9073	55.6185	17.5719	16.4725	16.3662	0.99432	-2.32204	0.0325862
adgrb3	ENSDARG00000059832	566117	198.333	62.4489	179.624	27.1312	6.13731	7.95456	-3.41308	7.77394e-06
adgrd1	ENSDARG00000053344		50.2815	40.9821	28.3102	60.0761	87.9681	60.6535	0.802303	0.285903
adgrd2	ENSDARG00000103067	571770	17.6916	13.6607	17.5719	20.3484	5.11442	2.98296	-0.779201	0.65071
adgre10	ENSDARG00000075855	569655	733.737	4507.05	2760.74	32237.6	4516.03	10011.8	2.54711	0.0626012
adgre14	ENSDARG00000056062	108182849	12.1048	3.90305	3.90486	3.87588	4.09154	10.9375	-0.0776535	0.979061
adgre15	ENSDARG00000096588	100536619	13.9671	15.6122	6.83351	0	9.20596	2.98296	-1.58562	0.42002
adgre17	ENSDARG00000095297		17.6916	18.5395	17.5719	11.6276	2.04577	13.9205	-0.96075	0.52355
adgre18	ENSDARG00000096644		1.86228	1.95153	1.95243	9.6897	0	4.9716	1.34925	1
adgre19	ENSDARG00000096649		2.79342	0	7.80972	0.96897	0	2.98296	-1.42106	1
adgre5a	ENSDARG00000026313		8.38025	1.95153	0	0	0	6.96024	-0.5724	1
adgre5b.2	ENSDARG00000104083	101882660	30.7276	8.78187	6.83351	21.3173	43.984	18.8921	0.857479	0.52355
adgre5b.3	ENSDARG00000112943	100536657	65.1797	109.286	92.7405	88.1763	133.998	114.347	0.332875	0.678078
adgre6	ENSDARG00000095494		8.38025	0.975763	7.80972	15.5035	0	0	-0.144171	1
adgre8	ENSDARG00000079050		9.31139	3.90305	0.976215	20.3484	5.11442	0.99432	0.897347	0.730289
adgre9	ENSDARG00000096577	101883848	21.4162	14.6365	5.85729	14.5345	8.18308	14.9148	-0.155892	0.937289
adgrf11	ENSDARG00000075134	100537132	4.65569	3.90305	0	2.90691	6.13731	8.94888	1.06827	1
adgrf3a	ENSDARG00000087870	101886922	27.003	29.2729	30.2627	8.72073	0	5.96592	-2.55177	0.0312748
adgrf3b	ENSDARG00000093008	565465	114.53	35.1275	45.8821	50.3864	58.3044	41.7615	-0.379466	0.729209
adgrf6	ENSDARG00000091757		45.6258	52.6912	84.9307	56.2003	59.3273	66.6195	-0.00820501	0.993934
adgrf7	ENSDARG00000086445		13.0359	7.80611	1.95243	14.5345	0	8.94888	0.0438255	0.989238
adgrf8	ENSDARG00000093316	100537224	35.3833	50.7397	45.8821	22.2863	4.09154	9.9432	-1.8573	0.045362
adgrg1	ENSDARG00000027222	324948	465.569	452.754	560.348	202.515	238.332	243.608	-1.11135	0.00532394
adgrg11	ENSDARG00000041413	563883	25.1408	7.80611	20.5005	3.87588	19.4348	15.9091	-0.449567	0.801886
adgrg2a	ENSDARG00000088137	101882832	32.5899	43.9094	49.787	5.81382	18.4119	52.699	-0.715426	0.575491
adgrg3	ENSDARG00000074782	799479	68.9043	229.304	79.0735	16.4725	5.11442	14.9148	-3.36618	8.96568e-06
adgrg4a	ENSDARG00000105416	793963	21.4162	8.78187	14.6432	14.5345	0	18.8921	-0.422706	0.851807
adgrg4b	ENSDARG00000094386		18.6228	7.80611	1.95243	12.5966	4.09154	12.9262	0.060049	0.981598
adgrg6	ENSDARG00000054137	561970	488.848	610.828	372.914	1078.46	2452.88	1411.93	1.74705	0.000146313
adgrg7.2	ENSDARG00000071085		7.44911	0	0	6.78279	0	5.96592	0.771246	1
adgrl1a	ENSDARG00000089292	562531	135.946	51.7155	50.7632	30.0381	6.13731	27.841	-1.89558	0.0260136
adgrl2a	ENSDARG00000069356	57987	1754.27	1667.58	1594.16	2954.39	4152.91	2933.24	1.0012	0.00825314
adgrl2b.1	ENSDARG00000111712	110437953	7.44911	10.7334	5.85729	20.3484	4.09154	22.8694	0.978399	0.548107
ADGRL3	ENSDARG00000090624		414.357	361.032	449.059	313.946	281.293	269.461	-0.501804	0.306291
adgrl3.1	ENSDARG00000061121	560631	861.304	404.942	417.82	640.489	964.58	735.797	0.474845	0.458784
adgrl4	ENSDARG00000013653	406676	21.4162	18.5395	43.9297	106.587	99.2198	43.7501	1.57367	0.0332113
adgrv1	ENSDARG00000021137	415105	851.061	816.714	694.089	283.908	205.6	158.097	-1.86653	4.39554e-06
adh5	ENSDARG00000080010	116517	1237.48	2159.36	1896.79	3334.23	2608.36	2806.97	0.72501	0.109872
adh8a	ENSDARG00000091211	322482	15.8294	22.4426	34.1675	48.4485	32.7323	46.7331	0.821991	0.378231
adh8b	ENSDARG00000024278	402841	120.117	149.292	295.793	397.278	488.939	453.41	1.24529	0.0148572
adhfe1	ENSDARG00000053518	404618	90.3205	92.6975	66.3827	142.439	252.652	206.819	1.27059	0.0122509
adi1	ENSDARG00000020448	324079	300.758	398.112	589.634	728.665	760.003	678.126	0.750025	0.124319
adipoqa	ENSDARG00000062228	562602	4.65569	0.975763	0	0.96897	6.13731	2.98296	0.832298	1
adipoqb	ENSDARG00000100086	751715	5.58683	1.95153	2.92865	1.93794	2.04577	4.9716	-0.227296	1
adipor1a	ENSDARG00000002912	436740	972.109	588.385	715.566	847.849	1480.11	798.439	0.457807	0.450752
adipor1b	ENSDARG00000042717	406821	295.171	214.668	371.938	206.391	235.263	187.927	-0.486116	0.403319
adipor2	ENSDARG00000101849	560140	1433.02	2040.32	1404.77	5358.4	3429.73	3416.48	1.32307	0.00112864
adka	ENSDARG00000039429	368220	356.626	526.912	422.701	234.491	490.985	549.859	-0.0346228	0.971276
adkb	ENSDARG00000095947	322229	175.985	231.256	329.961	265.498	399.948	414.632	0.551115	0.35532
adm2a	ENSDARG00000045708	403114	23.2785	21.4668	7.80972	19.3794	4.09154	13.9205	-0.48959	0.780806
adm2b	ENSDARG00000078875	100322075	8.38025	4.87882	0	5.81382	1.02288	9.9432	0.338351	1
adma	ENSDARG00000015263	556502	58.6618	92.6975	134.718	762.579	878.658	465.342	2.88109	2.66644e-09
admb	ENSDARG00000069027	570100	92.1828	166.856	188.41	1086.22	1592.63	588.638	2.86875	1.80744e-08
admp	ENSDARG00000025372	140619	21.4162	17.5637	0	16.4725	1.02288	14.9148	-0.265696	0.924177
adnp2a	ENSDARG00000060937	100007394	212.3	184.419	242.101	259.684	247.538	228.694	0.204165	0.766402
adnp2b	ENSDARG00000028431	564171	740.255	905.509	779.996	854.632	1352.25	1049.01	0.424573	0.414255
adnpa	ENSDARG00000062002	564637	877.133	886.969	1137.29	458.323	947.191	739.774	-0.435683	0.461702
adnpb	ENSDARG00000074293	100330315	579.168	448.851	681.398	390.495	417.337	341.052	-0.573312	0.236743
adoa	ENSDARG00000042827	494091	242.096	177.589	168.885	227.708	410.177	372.87	0.779699	0.140292
adob	ENSDARG00000053571	406474	149.913	160.025	115.193	258.715	306.865	296.307	1.0194	0.0225115
adora1a	ENSDARG00000070056	100007535	8.38025	8.78187	3.90486	3.87588	2.04577	3.97728	-1.08837	1
adora1b	ENSDARG00000075694	100150997	22.3473	4.87882	8.78594	0.96897	8.18308	5.96592	-1.2578	0.51196
adora2aa	ENSDARG00000033706	561701	77.2845	50.7397	61.5016	525.182	258.79	337.075	2.56399	7.64745e-08
adora2ab	ENSDARG00000058488	566118	14.8982	3.90305	24.4054	0.96897	2.04577	6.96024	-2.11587	0.213757
adora2b	ENSDARG00000002533	560100	29.7964	17.5637	15.6194	30.0381	13.2975	18.8921	-0.0171451	0.992503
adpgk	ENSDARG00000063525	557919	68.9043	54.6428	29.2865	32.945	29.6636	37.7842	-0.606824	0.518166
adpgk2	ENSDARG00000062785	566398	41.9013	32.2002	19.5243	77.5176	32.7323	35.7955	0.641487	0.530239
adprh	ENSDARG00000040712	445059	58.6618	59.5216	101.526	239.336	283.339	196.875	1.71189	0.00040739
adprhl1	ENSDARG00000041589	450012	8.38025	6.83034	8.78594	5.81382	1.02288	0.99432	-1.60915	1
adprhl2	ENSDARG00000019338	796446	243.027	221.498	285.055	118.214	141.158	133.239	-0.933141	0.0420902
adprm	ENSDARG00000026090	393393	33.521	21.4668	21.4767	63.952	9.20596	23.8637	0.344576	0.822889
adra1aa	ENSDARG00000028725	798498	47.4881	35.1275	33.1913	95.928	20.4577	86.5059	0.809349	0.402452
adra1ab	ENSDARG00000027638	557259	42.8324	44.8851	50.7632	17.4415	2.04577	6.96024	-2.3826	0.0107481
adra1ba	ENSDARG00000011317	100149100	26.0719	17.5637	3.90486	7.75176	12.2746	7.95456	-0.767271	0.655017
adra1bb	ENSDARG00000041173	492486	49.3504	45.8609	70.2875	113.369	37.8467	36.7899	0.185192	0.881009
adra1d	ENSDARG00000024101	568614	103.356	121.97	191.338	720.914	582.021	508.098	2.1203	9.33467e-07
adra2a	ENSDARG00000040841	266750	14.8982	22.4426	6.83351	30.0381	13.2975	12.9262	0.350207	0.836899
adra2b	ENSDARG00000102096	266751	19.5539	14.6365	8.78594	35.8519	8.18308	34.8012	0.875341	0.507916
adra2c	ENSDARG00000069669	266752	27.9342	8.78187	23.4292	11.6276	9.20596	21.875	-0.494473	0.755483
adra2da	ENSDARG00000091277	266754	40.9701	41.9578	33.1913	65.89	148.318	99.432	1.43271	0.0203327
adra2db	ENSDARG00000054667	266755	14.8982	7.80611	5.85729	10.6587	4.09154	9.9432	-0.210014	0.926585
adrb1	ENSDARG00000007490	557194	22.3473	15.6122	7.80972	0	0	17.8978	-1.35495	0.562209
adrb2a	ENSDARG00000088124	565838	82.8714	78.0611	122.027	103.68	162.639	136.222	0.50842	0.456756
adrb2b	ENSDARG00000054510	100037315	34.4521	27.3214	12.6908	4.84485	16.3662	28.8353	-0.575124	0.707392
adrb3a	ENSDARG00000053646	558248	167.605	189.298	288.96	578.475	650.555	689.064	1.5706	0.000145414
adrb3b	ENSDARG00000052919	792519	21.4162	32.2002	12.6908	9.6897	11.2517	11.9318	-1.01255	0.411942
adrm1	ENSDARG00000058560	796450	480.468	689.865	940.096	738.355	786.598	929.69	0.218079	0.755742
adsl	ENSDARG00000017049	334431	125.704	267.359	227.458	231.584	280.27	228.694	0.255384	0.742483
adss	ENSDARG00000002071	550502	8.38025	25.3699	12.6908	20.3484	5.11442	4.9716	-0.605763	0.74421
adssl	ENSDARG00000012399	192305	628.519	1176.77	1263.22	607.544	1001.4	1130.54	-0.16361	0.841193
adssl1	ENSDARG00000099517	407989	30.7276	28.2971	26.3578	31.007	39.8925	25.8523	0.179617	0.886392
adtrp1	ENSDARG00000037810	550414	122.91	224.426	169.861	119.183	176.959	210.796	-0.0288159	0.97778
aebp1	ENSDARG00000091726	793308	232.785	422.506	175.719	602.699	840.811	862.076	1.47226	0.0022339
aebp2	ENSDARG00000006038	406815	468.363	365.911	536.919	456.385	513.488	320.171	-0.0880734	0.910995
aep1	ENSDARG00000039099	503710	45.6258	18.5395	59.5491	218.018	344.712	317.188	2.8299	2.25077e-07
aes	ENSDARG00000021805	393395	83.8025	99.5279	89.8118	86.2383	37.8467	137.216	-0.0633617	0.958285
afap1	ENSDARG00000055284	568356	129.428	62.4489	65.4064	112.401	226.057	92.4718	0.74295	0.328775
afap1l1a	ENSDARG00000089162	566757	114.53	143.437	218.672	484.485	747.729	484.234	1.84871	4.59035e-05
afap1l1b	ENSDARG00000056453	768144	59.5929	91.7218	75.1686	196.701	240.378	129.262	1.32259	0.0115948
afap1l2	ENSDARG00000074806	567369	189.952	234.183	242.101	1470.9	1168.13	1042.05	2.46624	3.39567e-11
afdna	ENSDARG00000029472	558359	593.136	692.792	515.442	991.256	846.948	794.462	0.54747	0.231614
aff2	ENSDARG00000052242	100330019	891.1	574.725	876.642	758.704	1108.81	762.644	0.167004	0.81581
aff3	ENSDARG00000079575	570215	145.258	119.043	78.0972	638.551	563.609	717.899	2.4869	2.81462e-09
aff4	ENSDARG00000001857	556421	176.916	231.256	97.6215	379.836	61.3731	152.131	0.230735	0.848186
afg1la	ENSDARG00000011466	561238	92.1828	87.8187	111.289	61.0451	77.7392	61.6479	-0.539626	0.430241
afg1lb	ENSDARG00000042902	555926	70.7666	96.6006	102.503	76.5486	120.7	108.381	0.179494	0.841783
afg3l2	ENSDARG00000062272	569168	250.476	332.735	322.151	268.405	412.222	294.319	0.106762	0.889678
afmid	ENSDARG00000099106	550372	135.946	149.292	193.291	77.5176	106.38	115.341	-0.677443	0.2456
afp4	ENSDARG00000095863	568707	36.3144	44.8851	282.126	30.0381	6.13731	31.8183	-2.41604	0.0137778
aftpha	ENSDARG00000069249	556043	82.8714	20.491	9.76215	15.5035	29.6636	26.8466	-0.65391	0.646743
aftphb	ENSDARG00000071347	100004990	40.039	11.7092	0	12.5966	18.4119	14.9148	-0.174745	0.943138
aga	ENSDARG00000004889	566517	166.674	263.456	303.603	291.66	304.82	329.12	0.335411	0.606753
agap1	ENSDARG00000062123	100148154	1065.22	598.143	708.732	1048.43	1512.85	1277.7	0.694407	0.155075
agap2	ENSDARG00000099874	565109	165.743	122.946	482.25	27.1312	15.3433	26.8466	-3.47388	1.58316e-07
agap3	ENSDARG00000087822	324332	98.7007	69.2792	75.1686	55.2313	41.9383	60.6535	-0.623505	0.390134
AGBL1	ENSDARG00000104384	100536841	42.8324	25.3699	40.0248	30.0381	16.3662	22.8694	-0.642907	0.539076
agbl2	ENSDARG00000079983	568152	21.4162	27.3214	34.1675	24.2242	15.3433	22.8694	-0.407558	0.748737
agbl4	ENSDARG00000068050	550450	36.3144	21.4668	33.1913	0.96897	6.13731	0	-3.69194	0.00271979
agbl5	ENSDARG00000045900	445479	152.707	118.067	137.646	187.011	227.08	185.938	0.554634	0.314383
agfg1a	ENSDARG00000030020	327597	352.902	429.336	331.913	637.582	757.957	759.661	0.951875	0.0164916
agfg1b	ENSDARG00000019526	393560	294.24	362.984	559.371	664.713	593.273	490.2	0.523193	0.35298
aggf1	ENSDARG00000060109	559905	229.06	281.996	265.531	309.101	228.103	209.802	-0.0557315	0.945641
agk	ENSDARG00000009837	334270	134.084	145.389	153.266	104.649	135.021	120.313	-0.265733	0.711502
agla	ENSDARG00000103811	567798	351.971	338.59	487.132	356.581	573.838	473.296	0.253209	0.707284
aglb	ENSDARG00000100352	553352	37.2456	27.3214	8.78594	5.81382	9.20596	13.9205	-1.34362	0.283219
agmat	ENSDARG00000059700	556522	14.8982	8.78187	11.7146	9.6897	6.13731	10.9375	-0.403056	0.832086
agmo	ENSDARG00000025595	405819	214.162	406.893	491.036	713.162	743.637	750.712	0.989382	0.0417771
ago1	ENSDARG00000092644	570775	27.003	34.1517	13.667	15.5035	5.11442	11.9318	-1.19854	0.319778
ago2	ENSDARG00000061268	570630	24.2096	32.2002	14.6432	23.2553	12.2746	16.9034	-0.437211	0.755793
ago3a	ENSDARG00000059888	567622	131.291	150.268	63.454	154.066	104.334	196.875	0.400111	0.630524
ago3b	ENSDARG00000063079	568159	84.7336	135.631	26.3578	127.904	169.799	107.387	0.715157	0.409689
ago4	ENSDARG00000100854	100535764	191.815	183.444	206.958	158.911	65.4646	121.307	-0.751386	0.21883
agpat2	ENSDARG00000101139	777624	365.006	503.494	609.158	769.362	832.628	903.837	0.762103	0.0896561
agpat3	ENSDARG00000036549	406734	716.046	570.822	473.465	851.725	702.722	841.195	0.444498	0.385356
agpat4	ENSDARG00000069044	406265	202.988	236.135	299.698	199.608	195.371	132.245	-0.486647	0.416173
agpat5	ENSDARG00000063187	767778	60.524	69.2792	45.8821	22.2863	75.6935	54.6876	-0.203856	0.865481
agpat9l	ENSDARG00000006491	567414	16.7605	11.7092	52.7156	65.89	72.6248	49.716	1.21418	0.177218
agps	ENSDARG00000042821	386801	36.3144	25.3699	22.453	22.2863	27.6179	64.6308	0.444075	0.716324
agr1	ENSDARG00000060682	335309	47.4881	113.189	262.602	154.066	56.2586	139.205	-0.275386	0.820961
agr2	ENSDARG00000070480	335616	960.004	1197.26	1377.44	131.78	309.934	155.114	-2.56669	2.64617e-08
agrn	ENSDARG00000079388	565373	2086.68	1677.34	2610.4	1854.61	2836.46	1978.7	0.0653124	0.932265
agrp	ENSDARG00000069089	100149042	23.2785	52.6912	115.193	16.4725	6.13731	5.96592	-2.73795	0.0026215
agt	ENSDARG00000016412	322485	22.3473	29.2729	75.1686	46.5106	29.6636	33.8069	-0.203697	0.879725
agtpbp1	ENSDARG00000105214	554164	33.521	21.4668	20.5005	13.5656	9.20596	15.9091	-0.964548	0.397
agtr1a	ENSDARG00000018616	794575	16.7605	4.87882	1.95243	8.72073	39.8925	23.8637	1.61349	0.250653
agtr1b	ENSDARG00000045443	100333455	14.8982	15.6122	6.83351	15.5035	6.13731	2.98296	-0.598914	0.761461
agtr2	ENSDARG00000035552	503772	173.192	354.202	369.009	1789.69	1933.25	1646.59	2.58288	1.11476e-09
agtrap	ENSDARG00000077082	793937	27.9342	47.8124	41.0011	31.007	18.4119	33.8069	-0.486782	0.653819
agxt2	ENSDARG00000100709	619269	43.7635	54.6428	59.5491	143.408	90.0138	61.6479	0.902363	0.192135
agxta	ENSDARG00000052099	436603	12.1048	8.78187	52.7156	22.2863	0	6.96024	-1.32747	0.458963
agxtb	ENSDARG00000018478	79378	49.3504	80.9884	352.414	43.6036	11.2517	108.381	-1.56368	0.132966
ahctf1	ENSDARG00000077530	553494	690.905	890.872	861.022	601.73	762.049	717.899	-0.230791	0.698068
ahcy	ENSDARG00000005191	387530	1506.58	3285.4	2137.91	2064.88	2828.28	3289.21	0.239705	0.74421
ahcyl1	ENSDARG00000056331	798918	551.234	613.755	1229.06	2228.63	2400.71	2698.59	1.61404	0.000290835
ahcyl2	ENSDARG00000039343	394240	313.794	330.784	280.174	416.657	582.021	469.319	0.666578	0.145396
ahdc1	ENSDARG00000093453	100536210	280.273	270.286	293.841	187.011	430.634	341.052	0.182868	0.821296
ahi1	ENSDARG00000044056	562701	398.527	513.252	346.556	537.778	474.618	621.45	0.376825	0.499945
ahnak	ENSDARG00000061764	559276	3526.22	5431.1	4750.26	9422.26	18629.8	12147.6	1.55221	0.000235871
ahr1a	ENSDARG00000020046	246224	18.6228	6.83034	0	6.78279	1.02288	11.9318	-0.367876	0.903558
ahr1b	ENSDARG00000023537	554265	64.2486	38.0548	8.78594	22.2863	5.11442	10.9375	-1.53316	0.200379
ahr2	ENSDARG00000021833	30517	1108.06	1485.11	1279.82	2299.37	3740.69	3080.4	1.23566	0.00156965
ahrra	ENSDARG00000099702	641291	14.8982	1.95153	5.85729	7.75176	2.04577	6.96024	-0.438761	0.867607
ahrrb	ENSDARG00000052618	565319	35.3833	22.4426	4.88108	17.4415	5.11442	16.9034	-0.667944	0.689216
ahsa1a	ENSDARG00000028664	565968	70.7666	212.716	66.3827	1056.18	206.623	457.387	2.29814	0.0010847
ahsa1b	ENSDARG00000100317	321945	189.021	1485.11	222.577	3453.41	305.842	2717.48	1.7718	0.365118
ahsg1	ENSDARG00000026764	569558	8.38025	3.90305	3.90486	67.8279	4.09154	11.9318	2.37172	0.0927902
ahsg2	ENSDARG00000069293	567406	3.72456	11.7092	9.76215	10.6587	1.02288	6.96024	-0.429871	0.864148
aicda	ENSDARG00000015734	493784	3.72456	6.83034	0	9.6897	6.13731	6.96024	1.11065	1
aida	ENSDARG00000014532	393763	112.668	91.7218	123.979	152.128	252.652	216.762	0.920203	0.0772391
aif1l	ENSDARG00000009336	321033	891.1	877.211	1344.25	1799.38	1515.91	1531.25	0.638913	0.160509
aifm1	ENSDARG00000058088	373125	561.477	712.307	615.016	447.664	576.907	453.41	-0.353887	0.511532
aifm2	ENSDARG00000077549	557507	228.129	392.257	330.937	548.437	789.667	773.581	1.15053	0.00888556
aifm3	ENSDARG00000062780	100150876	24.2096	6.83034	3.90486	16.4725	0	2.98296	-0.842526	0.739142
aifm4	ENSDARG00000061634	791218	146.189	128.801	264.554	128.873	151.387	197.87	-0.174238	0.844454
aifm5	ENSDARG00000075551	557064	12.1048	0.975763	4.88108	3.87588	0	1.98864	-1.61065	1
aig1	ENSDARG00000007171	562261	205.782	54.6428	99.574	9.6897	20.4577	18.8921	-2.87838	5.70039e-05
aimp1	ENSDARG00000060036	562232	311.932	573.749	527.156	476.733	552.358	565.768	0.174969	0.811245
aimp2	ENSDARG00000018903	406647	151.776	163.928	229.411	351.736	241.401	216.762	0.571557	0.327077
aip	ENSDARG00000104437	334795	758.878	851.842	814.164	1228.65	2064.18	1678.41	1.03566	0.0102244
aipl1	ENSDARG00000075067	100537095	59.5929	44.8851	19.5243	14.5345	12.2746	14.9148	-1.57175	0.0816195
aipl2	ENSDARG00000098164	100534741	75.4223	44.8851	11.7146	17.4415	4.09154	16.9034	-1.77883	0.104104
aire	ENSDARG00000056784	100007662	7.44911	10.7334	5.85729	13.5656	5.11442	9.9432	0.253763	0.908568
ajap1	ENSDARG00000038655	101887016	498.159	358.105	884.451	114.338	95.1283	99.432	-2.49424	1.6228e-07
ajuba	ENSDARG00000077842	572549	423.668	618.634	532.037	680.217	814.216	819.32	0.555555	0.237506
ak1	ENSDARG00000001950	445486	378.042	456.657	881.523	2218.94	1671.39	1271.74	1.58885	0.000936614
ak2	ENSDARG00000005926	321793	982.352	2377.94	1992.46	3599.72	2682	3010.8	0.795859	0.12533
ak3	ENSDARG00000058226	406404	192.746	274.19	286.031	346.891	460.298	379.83	0.656806	0.184414
ak4	ENSDARG00000006546	406590	249.545	217.595	158.147	351.736	480.756	484.234	1.07404	0.0159944
ak5	ENSDARG00000012555	100003595	99.6319	78.0611	164.004	45.5416	18.4119	14.9148	-2.11301	0.00199006
ak5l	ENSDARG00000017739	548336	47.4881	47.8124	120.075	31.976	41.9383	8.94888	-1.37829	0.124852
AK6	ENSDARG00000035573	415208	88.4582	274.19	338.747	317.822	170.822	366.904	0.287092	0.772801
ak7a	ENSDARG00000019001	402854	63.3174	28.2971	40.0248	22.2863	18.4119	2.98296	-1.59162	0.120177
ak7b	ENSDARG00000017023	504040	33.521	14.6365	17.5719	3.87588	5.11442	0	-2.87313	0.0335917
ak8	ENSDARG00000030961	553671	23.2785	15.6122	26.3578	1.93794	4.09154	5.96592	-2.446	0.0391306
ak9	ENSDARG00000021913	557708	49.3504	59.5216	53.6919	41.6657	18.4119	33.8069	-0.790464	0.34944
akap10	ENSDARG00000059549	566920	21.4162	14.6365	12.6908	23.2553	1.02288	10.9375	-0.466572	0.816201
akap11	ENSDARG00000075435	558595	392.009	307.366	516.418	528.089	452.115	355.967	0.136278	0.858149
akap12a	ENSDARG00000091792	101885554	125.704	82.9399	63.454	89.1452	30.6865	42.7558	-0.742142	0.377172
akap12b	ENSDARG00000055678	567365	2216.11	3039.5	2147.67	7482.39	14765.3	8503.43	2.0544	8.96069e-07
akap17a	ENSDARG00000104768	393655	166.674	147.34	122.027	118.214	212.76	181.961	0.233746	0.769227
akap1a	ENSDARG00000089802	100002545	17.6916	10.7334	5.85729	9.6897	2.04577	0	-1.54247	0.461457
akap1b	ENSDARG00000006062	556208	591.273	625.464	505.68	476.733	419.383	557.814	-0.244446	0.684262
akap6	ENSDARG00000077295	100002625	229.06	139.534	245.03	38.7588	27.6179	41.7615	-2.5038	7.93858e-07
akap7	ENSDARG00000043843		8.38025	1.95153	3.90486	0.96897	5.11442	0	-1.23458	1
akap8l	ENSDARG00000099635	406500	1328.74	1540.73	1758.16	1571.67	1258.15	1238.92	-0.18563	0.763063
akap9	ENSDARG00000079610	565037	642.486	617.658	821.973	372.084	381.536	385.796	-0.869734	0.0313625
akip1	ENSDARG00000069037	562301	49.3504	82.9399	90.788	67.8279	41.9383	41.7615	-0.556685	0.504316
akirin1	ENSDARG00000039969	406432	712.321	1007.96	1128.51	821.687	1429.99	1070.88	0.221939	0.750265
akirin2	ENSDARG00000058729	406855	544.716	713.283	457.845	538.747	620.891	739.774	0.146626	0.835992
akna	ENSDARG00000087110	556113	108.943	125.873	48.8108	83.3314	18.4119	53.6933	-0.866576	0.342182
aknad1	ENSDARG00000094414		6.51797	13.6607	10.7384	3.87588	12.2746	9.9432	-0.245626	0.910171
akr1a1a	ENSDARG00000035257	445326	6.51797	4.87882	6.83351	1.93794	13.2975	0	-0.263108	1
akr1a1b	ENSDARG00000052030	799805	226.267	452.754	585.729	271.312	410.177	393.751	-0.234111	0.777308
akr1b1	ENSDARG00000006215	415138	102.425	116.116	185.481	211.235	204.577	227.699	0.671908	0.235312
akr7a3	ENSDARG00000016649	436642	211.369	253.699	337.771	267.436	254.698	325.143	0.0779406	0.923558
akt1	ENSDARG00000099657		27.003	62.4489	55.6443	82.3624	27.6179	59.6592	0.227225	0.853652
akt1s1	ENSDARG00000074667	566559	768.19	861.599	915.69	1667.6	1747.09	1513.36	0.953109	0.00913902
akt2	ENSDARG00000011219	378972	696.492	866.478	581.824	1662.75	1298.04	1220.03	0.962989	0.0185748
akt2l	ENSDARG00000103612	403146	125.704	176.613	274.317	427.316	541.106	276.421	1.11048	0.0394135
akt3a	ENSDARG00000104810	560549	112.668	75.1338	44.9059	74.6107	23.5263	56.6763	-0.587469	0.543867
akt3b	ENSDARG00000087205	100149794	81.9402	39.0305	27.334	33.9139	82.8536	42.7558	0.10317	0.940115
aktip	ENSDARG00000026862	378716	475.812	418.603	440.273	633.706	1599.79	955.542	1.25648	0.00857434
AL590134.1	ENSDARG00000095161		11.1737	13.6607	8.78594	23.2553	49.0985	24.858	1.53082	0.11593
AL590145.1	ENSDARG00000095967		13.9671	24.3941	54.6681	0	0	0	-7.40367	4.37801e-06
AL590149.1	ENSDARG00000012581		492.573	372.742	550.586	73.6417	119.677	147.159	-2.0565	5.11163e-06
AL590150.1	ENSDARG00000092341		22.3473	17.5637	17.5719	23.2553	2.04577	22.8694	-0.25333	0.893406
AL590151.1	ENSDARG00000053570	368435	24.2096	20.491	30.2627	20.3484	20.4577	18.8921	-0.328418	0.804931
AL590151.2	ENSDARG00000105320	103908760	6.51797	1.95153	5.85729	0	4.09154	4.9716	-0.664772	1
AL590152.1	ENSDARG00000110696		18.6228	3.90305	8.78594	20.3484	0	7.95456	-0.1445	0.959845
AL627305.1	ENSDARG00000100324	572670	49.3504	34.1517	7.80972	34.8829	2.04577	34.8012	-0.347688	0.854486
AL645691.1	ENSDARG00000102561	100536867	5.58683	1.95153	0	0	2.04577	9.9432	0.664871	1
AL645691.2	ENSDARG00000102716		8.38025	0	1.95243	0	0	11.9318	0.20475	1
AL645792.2	ENSDARG00000103788	101883946	23.2785	0.975763	3.90486	4.84485	4.09154	7.95456	-0.740213	0.767212
AL732488.1	ENSDARG00000096717	110438942	282.135	322.002	131.789	297.474	1429.99	806.394	1.78352	0.00503326
AL732515.1	ENSDARG00000095199		7.44911	14.6365	3.90486	2.90691	0	6.96024	-1.39434	1
AL732567.1	ENSDARG00000102957		8.38025	6.83034	68.3351	9.6897	0	6.96024	-2.32211	0.146019
AL772146.2	ENSDARG00000105823		17.6916	8.78187	13.667	4.84485	12.2746	3.97728	-0.931749	0.580949
AL772219.1	ENSDARG00000117701		15.8294	6.83034	6.83351	12.5966	12.2746	4.9716	0.0149878	0.994303
AL772241.1	ENSDARG00000110792		358.488	212.716	122.027	66.8589	54.2129	196.875	-1.1247	0.1409
AL772298.1	ENSDARG00000089005		40.039	4.87882	30.2627	46.5106	11.2517	15.9091	-0.0287823	0.989024
AL772300.1	ENSDARG00000097343		19.5539	18.5395	30.2627	13.5656	49.0985	23.8637	0.338848	0.814192
AL772300.2	ENSDARG00000117344		7.44911	7.80611	1.95243	12.5966	6.13731	2.98296	0.3362	0.897832
AL772314.1	ENSDARG00000097492		110.806	155.146	464.679	18.4104	5.11442	7.95456	-4.53173	2.30793e-09
AL772362.1	ENSDARG00000097552		9.31139	4.87882	0	17.4415	4.09154	2.98296	0.787556	0.775367
AL772373.1	ENSDARG00000117427		53.0749	4.87882	9.76215	19.3794	27.6179	10.9375	-0.227889	0.908786
AL772382.1	ENSDARG00000097122		36.3144	35.1275	8.78594	48.4485	22.5035	15.9091	0.114863	0.946498
AL773558.1	ENSDARG00000098223		73.56	59.5216	73.2162	47.4795	122.746	46.7331	0.0715958	0.953474
AL805905.1	ENSDARG00000117732		14.8982	6.83034	0	17.4415	1.02288	0	-0.233639	0.95042
AL807749.1	ENSDARG00000095989		18.6228	18.5395	0	0	0	12.9262	-1.52359	0.822803
AL807792.1	ENSDARG00000096836		39.1078	48.7882	95.6691	33.9139	15.3433	31.8183	-1.17714	0.157777
AL808129.1	ENSDARG00000097262		215.093	98.5521	295.793	74.6107	63.4188	33.8069	-1.82627	0.00282564
AL808129.2	ENSDARG00000112428		2.79342	3.90305	0	1.93794	4.09154	0	-0.154346	1
AL831726.1	ENSDARG00000086880		3.72456	3.90305	12.6908	9.6897	12.2746	0.99432	0.177015	0.949661
AL831726.2	ENSDARG00000104185	101882696	8.38025	0	2.92865	4.84485	0	0	-1.21859	1
AL831726.3	ENSDARG00000117226		3.72456	4.87882	10.7384	11.6276	2.04577	0	-0.495488	1
AL831745.1	ENSDARG00000039423	368914	31.6587	18.5395	63.454	17.4415	30.6865	18.8921	-0.762711	0.494201
AL831745.2	ENSDARG00000094022	110440182	5.58683	10.7334	17.5719	15.5035	16.3662	10.9375	0.338608	0.853052
AL831768.1	ENSDARG00000100923	100534861	11.1737	6.83034	9.76215	0.96897	11.2517	11.9318	-0.204085	0.934851
AL833789.1	ENSDARG00000096811		10.2425	11.7092	14.6432	18.4104	0	2.98296	-0.769758	0.743882
AL840638.1	ENSDARG00000098608		425.53	555.209	653.088	664.713	621.914	536.933	0.158631	0.817014
AL844141.1	ENSDARG00000096964		42.8324	18.5395	21.4767	35.8519	4.09154	30.8239	-0.226698	0.896362
AL844518.1	ENSDARG00000111211	100150820	11.1737	10.7334	8.78594	5.81382	6.13731	14.9148	-0.192436	0.929503
AL845320.1	ENSDARG00000092847		9.31139	3.90305	5.85729	6.78279	6.13731	6.96024	0.0583288	0.982801
AL845320.2	ENSDARG00000114981		5.58683	0	3.90486	0	0	7.95456	-0.256302	1
AL845324.1	ENSDARG00000023609		148.051	75.1338	189.386	76.5486	61.3731	57.6706	-1.07658	0.0860619
AL845330.1	ENSDARG00000108467	796214	33.521	36.1032	21.4767	27.1312	16.3662	6.96024	-0.851371	0.46988
AL845357.1	ENSDARG00000097796		5.58683	6.83034	4.88108	2.90691	0	2.98296	-1.54886	1
AL845362.1	ENSDARG00000093205		18.6228	17.5637	45.8821	1.93794	2.04577	2.98296	-3.55796	0.00221208
AL845369.2	ENSDARG00000095523		7.44911	13.6607	0	14.5345	8.18308	6.96024	0.492089	0.845556
AL845419.1	ENSDARG00000095869		0.931139	0	0	0	0	0	-0.911126	1
AL845428.1	ENSDARG00000041007	101883115	0	11.7092	5.85729	0.96897	0	0	-4.03626	1
AL928650.2	ENSDARG00000096526		0	4.87882	0	0	1.02288	9.9432	1.17166	1
AL928650.3	ENSDARG00000096599	103911855	35.3833	45.8609	15.6194	16.4725	41.9383	67.6138	0.378914	0.778563
AL928650.4	ENSDARG00000113858		63.3174	300.535	45.8821	153.097	59.3273	192.898	-0.0151041	0.992779
AL928657.1	ENSDARG00000097119		30.7276	6.83034	6.83351	5.81382	9.20596	4.9716	-1.15456	0.491645
AL928685.2	ENSDARG00000095907	555502	90.3205	146.365	126.908	147.283	244.469	170.029	0.627754	0.304522
AL928707.3	ENSDARG00000117700		9.31139	0.975763	3.90486	0	5.11442	2.98296	-0.816444	1
AL928714.1	ENSDARG00000117452		82.8714	25.3699	35.1438	26.1622	8.18308	22.8694	-1.32464	0.178772
AL928808.1	ENSDARG00000101333		164.812	79.0368	49.787	103.68	20.4577	73.5797	-0.570236	0.60317
AL928824.1	ENSDARG00000094456		86.5959	48.7882	52.7156	68.7969	59.3273	73.5797	0.1001	0.925926
AL928824.2	ENSDARG00000096744		10.2425	21.4668	15.6194	3.87588	8.18308	5.96592	-1.39422	0.325053
AL928824.3	ENSDARG00000096753		4.65569	3.90305	8.78594	8.72073	1.02288	0	-0.826258	1
AL928835.1	ENSDARG00000096583		10.2425	0	1.95243	19.3794	1.02288	6.96024	1.16276	0.668178
AL928845.1	ENSDARG00000093227		21.4162	21.4668	19.5243	5.81382	6.13731	6.96024	-1.72271	0.130308
AL928854.1	ENSDARG00000105454		125.704	113.189	204.029	79.4555	92.0596	79.5456	-0.819018	0.165304
AL928866.1	ENSDARG00000095266		4.65569	10.7334	1.95243	28.1001	1.02288	0.99432	0.799542	0.770389
AL928866.2	ENSDARG00000117398		0.931139	0.975763	0	0	0	0	-1.79735	1
AL928908.1	ENSDARG00000097437		0	0	0	5.81382	0	2.98296	4.05398	1
AL928908.2	ENSDARG00000097490		33.521	108.31	50.7632	59.1072	41.9383	189.915	0.595936	0.591109
AL928908.3	ENSDARG00000097636		31.6587	36.1032	100.55	26.1622	23.5263	10.9375	-1.47234	0.102564
AL928920.2	ENSDARG00000096699		0	0.975763	1.95243	0	0	5.96592	1.03085	1
AL929009.1	ENSDARG00000096446		40.039	25.3699	65.4064	31.976	32.7323	44.7444	-0.25705	0.830869
AL929017.1	ENSDARG00000074868	100170822	31.6587	20.491	12.6908	30.0381	11.2517	7.95456	-0.39607	0.808925
AL929028.1	ENSDARG00000105095		184.366	112.213	89.8118	73.6417	90.0138	88.4945	-0.616525	0.366701
AL929048.1	ENSDARG00000117298		64.2486	24.3941	20.5005	9.6897	15.3433	9.9432	-1.64441	0.0987772
AL929057.1	ENSDARG00000103165		10.2425	8.78187	40.0248	29.0691	29.6636	14.9148	0.319875	0.847065
AL929058.1	ENSDARG00000092980	110438186	54.9372	79.0368	90.788	322.667	449.046	342.046	2.30956	1.32966e-07
AL929105.1	ENSDARG00000105194		9.31139	13.6607	0	4.84485	2.04577	2.98296	-1.21656	1
AL929114.1	ENSDARG00000100085		0	1.95153	0	0	0	0	-1.82647	1
AL929114.2	ENSDARG00000101825		73.56	64.4004	89.8118	84.3004	65.4646	18.8921	-0.433158	0.682676
AL929171.1	ENSDARG00000095920	110439353	17.6916	3.90305	16.5957	12.5966	9.20596	3.97728	-0.567161	0.774665
AL929192.1	ENSDARG00000106684		8.38025	7.80611	16.5957	0	0	0	-5.89918	1
AL929208.1	ENSDARG00000105788	101885386	5.58683	6.83034	10.7384	2.90691	15.3433	28.8353	1.02407	0.551114
AL929210.2	ENSDARG00000117295		166.674	124.898	168.885	120.152	258.79	148.154	0.194435	0.82401
AL929216.1	ENSDARG00000117377		10.2425	14.6365	3.90486	0	1.02288	10.9375	-1.26748	0.609642
AL929217.1	ENSDARG00000059891	562831	9.31139	7.80611	8.78594	20.3484	4.09154	0.99432	-0.0235695	0.993195
AL929220.1	ENSDARG00000103323		6.51797	13.6607	8.78594	3.87588	0	0.99432	-2.56028	1
AL929222.2	ENSDARG00000097738		91.2516	140.51	273.34	1552.29	1906.66	999.292	3.14224	1.12501e-09
AL929229.1	ENSDARG00000091975		10.2425	6.83034	2.92865	2.90691	0	0	-2.76884	1
AL929237.1	ENSDARG00000094104	100536429	2.79342	7.80611	27.334	17.4415	5.11442	10.9375	-0.176031	0.940115
AL929237.2	ENSDARG00000095450		51.2126	10.7334	10.7384	16.4725	0	42.7558	-0.295872	0.899222
AL929237.3	ENSDARG00000096676	103909355	15.8294	14.6365	12.6908	11.6276	12.2746	5.96592	-0.53149	0.752284
AL929243.1	ENSDARG00000096290		101.494	66.3519	55.6443	58.1382	77.7392	57.6706	-0.208585	0.832531
AL929276.2	ENSDARG00000116984		20.4851	14.6365	24.4054	12.5966	8.18308	13.9205	-0.777677	0.558526
AL929294.1	ENSDARG00000117323		8.38025	6.83034	0	15.5035	0	2.98296	0.282737	1
AL929307.1	ENSDARG00000105542		11.1737	0	0.976215	0	2.04577	0	-2.58518	1
AL929309.1	ENSDARG00000097916		7.44911	1.95153	8.78594	0.96897	1.02288	10.9375	-0.492642	1
AL929315.1	ENSDARG00000092557		0.931139	0.975763	5.85729	5.81382	0	26.8466	2.07626	0.391025
AL929378.1	ENSDARG00000117372		8.38025	8.78187	7.80972	3.87588	4.09154	4.9716	-0.948728	1
AL929396.1	ENSDARG00000096530		12.1048	0	0	0	0	6.96024	-0.800959	1
AL929435.1	ENSDARG00000097234		216.955	186.371	104.455	98.8349	391.765	279.404	0.600134	0.465293
AL929457.1	ENSDARG00000095483		54.9372	29.2729	41.0011	1.93794	20.4577	24.858	-1.40839	0.208033
AL929457.2	ENSDARG00000098067		6.51797	10.7334	0.976215	0	0	0	-5.05289	1
AL929493.2	ENSDARG00000117535		14.8982	6.83034	5.85729	1.93794	12.2746	2.98296	-0.687729	0.766317
AL929520.1	ENSDARG00000094448		2.79342	0	0	5.81382	15.3433	0	2.90564	1
AL929520.2	ENSDARG00000095426		28.8653	38.0548	19.5243	0.96897	2.04577	13.9205	-2.35212	0.0632252
AL929520.3	ENSDARG00000115525		3.72456	7.80611	4.88108	0	0	7.95456	-1.04399	1
AL929523.1	ENSDARG00000098006		4.65569	7.80611	5.85729	1.93794	6.13731	9.9432	-0.0244585	1
AL929536.3	ENSDARG00000113274		19.5539	57.57	52.7156	47.4795	6.13731	71.5911	-0.0509123	0.978425
AL929536.5	ENSDARG00000115762		1.86228	1.95153	0	0.96897	4.09154	0	0.402833	1
AL929576.1	ENSDARG00000095566		9.31139	1.95153	0	14.5345	2.04577	0	0.556471	1
AL929586.1	ENSDARG00000098634		7.44911	7.80611	1.95243	9.6897	0	0	-0.823567	1
AL935044.3	ENSDARG00000104428	564387	11.1737	0	0.976215	1.93794	1.02288	3.97728	-0.811453	1
AL935053.1	ENSDARG00000105513		42.8324	43.9094	40.0248	61.0451	9.20596	45.7387	-0.126745	0.932863
AL935065.1	ENSDARG00000099693	567472	2.79342	0.975763	12.6908	5.81382	0	3.97728	-0.744462	1
AL935115.1	ENSDARG00000097120		264.443	38.0548	108.36	31.007	122.746	22.8694	-1.21939	0.235255
AL935126.1	ENSDARG00000102528		1.86228	3.90305	0	14.5345	1.02288	0	1.43479	1
AL935126.2	ENSDARG00000111309		43.7635	17.5637	12.6908	6.78279	2.04577	10.9375	-1.90381	0.130953
AL935144.1	ENSDARG00000093040		12.1048	0.975763	1.95243	3.87588	1.02288	0	-1.61521	1
AL935153.1	ENSDARG00000092042		11.1737	8.78187	20.5005	50.3864	69.5561	25.8523	1.84995	0.0315156
AL935166.1	ENSDARG00000095991		86.5959	95.6248	180.6	34.8829	15.3433	37.7842	-2.04182	0.00145437
AL935174.2	ENSDARG00000112088		38.1767	25.3699	14.6432	6.78279	63.4188	32.8126	0.395398	0.802303
AL935174.3	ENSDARG00000115129		12.1048	6.83034	2.92865	7.75176	1.02288	0.99432	-1.15821	1
AL935174.5	ENSDARG00000117464	563381	413.426	452.754	511.537	359.488	523.717	449.433	-0.0480721	0.950081
AL935183.1	ENSDARG00000094023		14.8982	3.90305	0	0	33.7552	18.8921	1.48095	0.526633
AL935184.2	ENSDARG00000095408		27.003	31.2244	21.4767	14.5345	9.20596	4.9716	-1.47142	0.172647
AL935186.1	ENSDARG00000025046		12.1048	8.78187	1.95243	4.84485	8.18308	0	-0.812946	1
AL935186.10	ENSDARG00000115988		33.521	0	0	6.78279	0	2.98296	-1.77869	0.800643
AL935186.2	ENSDARG00000097345		4.65569	6.83034	2.92865	0	0	9.9432	-0.535495	1
AL935186.6	ENSDARG00000112275		191.815	80.9884	17.5719	86.2383	40.9154	109.375	-0.296279	0.833157
AL935186.8	ENSDARG00000113671		191.815	80.9884	17.5719	86.2383	40.9154	109.375	-0.296279	0.833157
AL935186.9	ENSDARG00000115978		1124.82	1291.91	680.422	2018.36	861.269	2260.09	0.730778	0.228146
AL935198.1	ENSDARG00000092975		13.9671	0	14.6432	12.5966	6.13731	0	-0.610251	0.841216
AL935199.1	ENSDARG00000077746	100001479	11.1737	13.6607	12.6908	20.3484	5.11442	13.9205	0.0722072	0.972259
AL935269.1	ENSDARG00000117790		5.58683	4.87882	2.92865	9.6897	2.04577	3.97728	0.232297	1
AL935279.1	ENSDARG00000071407		14.8982	17.5637	5.85729	10.6587	4.09154	5.96592	-0.885298	0.616099
AL935294.2	ENSDARG00000104739		21.4162	13.6607	14.6432	3.87588	6.13731	10.9375	-1.24844	0.37462
AL935295.1	ENSDARG00000092636	110438847	124.773	61.4731	86.8832	182.166	162.639	97.4434	0.694746	0.307388
AL935295.2	ENSDARG00000117663		324.967	170.759	123.003	167.632	240.378	204.83	-0.0144131	0.989464
AL935300.2	ENSDARG00000097519		40.039	51.7155	48.8108	62.0141	11.2517	13.9205	-0.686677	0.570356
AL935300.3	ENSDARG00000098661	101885450	12.1048	6.83034	0	6.78279	1.02288	1.98864	-0.949114	1
AL953866.1	ENSDARG00000096884		0.931139	8.78187	0	0	1.02288	6.96024	-0.281837	1
AL953867.1	ENSDARG00000070885		22.3473	22.4426	12.6908	0	12.2746	28.8353	-0.484888	0.8195
AL953867.2	ENSDARG00000095689		4.65569	13.6607	0	8.72073	0	1.98864	-0.769666	1
AL953875.1	ENSDARG00000117502		17.6916	10.7334	7.80972	0	4.09154	4.9716	-2.00504	0.27283
AL953886.1	ENSDARG00000101745		6.51797	3.90305	8.78594	9.6897	4.09154	0	-0.476599	1
AL953894.1	ENSDARG00000093393		5.58683	1.95153	0	4.84485	1.02288	0.99432	-0.136145	1
AL953896.1	ENSDARG00000092472		24.2096	13.6607	10.7384	16.4725	6.13731	12.9262	-0.451415	0.791021
AL953907.2	ENSDARG00000113960		13.0359	1.95153	6.83351	7.75176	6.13731	6.96024	-0.0678473	0.980731
AL953910.1	ENSDARG00000103508		7.44911	0	4.88108	4.84485	1.02288	0.99432	-0.843481	1
AL954129.1	ENSDARG00000105524	103911374	17.6916	6.83034	10.7384	3.87588	1.02288	0	-2.83975	0.127622
AL954134.1	ENSDARG00000092078	110438025	27.003	1.95153	9.76215	40.6967	12.2746	17.8978	0.870362	0.591477
AL954138.1	ENSDARG00000117322		16.7605	4.87882	4.88108	0	0	2.98296	-3.15322	1
AL954142.1	ENSDARG00000092288	564963	13.9671	1.95153	5.85729	0	2.04577	13.9205	-0.450075	1
AL954142.2	ENSDARG00000095277		14.8982	10.7334	2.92865	0	1.02288	6.96024	-1.84091	1
AL954142.3	ENSDARG00000117430		23.2785	10.7334	9.76215	8.72073	9.20596	0	-1.28934	0.48791
AL954145.2	ENSDARG00000117560		5.58683	1.95153	9.76215	1.93794	1.02288	5.96592	-0.953475	1
AL954146.1	ENSDARG00000038891	560023	7.44911	10.7334	9.76215	0	0	0	-5.6689	1
AL954149.2	ENSDARG00000094185		19.5539	65.3762	53.6919	58.1382	47.0527	48.7217	0.152363	0.903657
AL954191.1	ENSDARG00000117407	101885516	49.3504	94.6491	175.719	34.8829	87.9681	85.5115	-0.617829	0.51133
AL954317.1	ENSDARG00000095834		4.65569	0.975763	0	3.87588	4.09154	12.9262	1.88254	1
AL954322.1	ENSDARG00000096918		27.003	27.3214	13.667	44.5726	101.266	43.7501	1.47798	0.0627496
AL954322.2	ENSDARG00000097072	101882098	99.6319	96.6006	82.0021	209.298	252.652	267.472	1.39017	0.00146585
AL954322.3	ENSDARG00000097266	101886962	342.659	216.619	273.34	353.674	426.543	308.239	0.386269	0.518328
AL954327.1	ENSDARG00000091368	567978	27.003	41.9578	14.6432	12.5966	12.2746	15.9091	-1.03556	0.356304
AL954359.1	ENSDARG00000093646	103911997	254.201	193.201	277.245	43.6036	32.7323	56.6763	-2.44517	2.73941e-07
AL954359.2	ENSDARG00000094423	103911998	82.8714	14.6365	88.8356	33.9139	12.2746	17.8978	-1.53857	0.115805
AL954361.1	ENSDARG00000078364	570571	5.58683	6.83034	1.95243	4.84485	1.02288	8.94888	0.0452512	1
AL954387.1	ENSDARG00000097221		15.8294	13.6607	8.78594	3.87588	6.13731	18.8921	-0.406123	0.839282
AL954655.1	ENSDARG00000052626		54.9372	25.3699	21.4767	35.8519	4.09154	2.98296	-1.24297	0.381466
AL954655.2	ENSDARG00000092719		19.5539	34.1517	12.6908	0.96897	4.09154	12.9262	-1.88535	0.175161
AL954666.1	ENSDARG00000097918		0.931139	0	10.7384	0	1.02288	1.98864	-1.95606	1
AL954669.1	ENSDARG00000097096		3.72456	7.80611	8.78594	8.72073	9.20596	6.96024	0.294434	0.897837
AL954672.1	ENSDARG00000105627		8.38025	6.83034	5.85729	2.90691	0	0	-2.84238	1
AL954682.1	ENSDARG00000112674		61.4552	212.716	160.099	701.534	811.147	714.916	2.35943	3.68578e-06
AL954694.1	ENSDARG00000092131		67.9731	54.6428	100.55	57.1692	109.449	75.5683	0.117516	0.913473
AL954694.2	ENSDARG00000093270		3.72456	6.83034	0	0	0	1.98864	-2.40774	1
AL954695.1	ENSDARG00000053731		8.38025	6.83034	0	9.6897	0	0	-0.647302	1
AL954695.2	ENSDARG00000079925		13.9671	8.78187	14.6432	9.6897	2.04577	2.98296	-1.34067	0.432774
AL954695.3	ENSDARG00000094127		29.7964	18.5395	5.85729	8.72073	6.13731	0.99432	-1.77322	0.2456
AL954696.1	ENSDARG00000078442	100332577	124.773	207.838	174.743	174.415	151.387	198.864	0.0488288	0.957461
AL954696.2	ENSDARG00000117348		42.8324	29.2729	14.6432	31.007	8.18308	32.8126	-0.268383	0.864308
AL954703.1	ENSDARG00000117314		11.1737	0.975763	3.90486	0.96897	0	0	-3.90973	1
AL954741.1	ENSDARG00000099302		2.79342	0	0	0	0	0	-2.35093	1
AL954741.2	ENSDARG00000115737		175.985	149.292	172.79	217.049	176.959	86.5059	-0.0516815	0.959524
AL954767.1	ENSDARG00000094503		26.0719	17.5637	37.0962	0.96897	4.09154	18.8921	-1.75367	0.195766
AL954816.1	ENSDARG00000095144		2.79342	8.78187	9.76215	0.96897	0	0	-4.31713	1
AL954831.1	ENSDARG00000097701		11.1737	21.4668	2.92865	1.93794	0	0	-4.17598	1
AL954861.2	ENSDARG00000099370		0	0.975763	0	4.84485	0	1.98864	2.72857	1
alad	ENSDARG00000100372	550338	150.845	190.274	193.291	138.563	280.27	228.694	0.276809	0.715668
alas1	ENSDARG00000021059	64608	1070.81	1876.39	1469.2	1984.45	1942.46	1992.62	0.422663	0.418186
alas2	ENSDARG00000038643	64607	388.285	47.8124	106.407	25.1932	22.5035	13.9205	-3.13849	9.51086e-05
alcama	ENSDARG00000026531	30194	1521.48	1793.45	2087.15	4486.33	5278.08	5203.28	1.47029	2.64857e-05
alcamb	ENSDARG00000058538	323919	1044.74	668.398	819.045	293.598	506.328	434.518	-1.03676	0.0213527
aldh16a1	ENSDARG00000037935	492710	92.1828	135.631	177.671	83.3314	177.982	185.938	0.141416	0.885473
aldh18a1	ENSDARG00000099579	557186	728.151	645.955	664.803	737.386	1060.73	729.831	0.310058	0.583405
aldh1a2	ENSDARG00000053493	116713	741.187	1086.02	2066.65	1776.12	5619.73	2728.41	1.37856	0.0220519
aldh1a3	ENSDARG00000076933	751785	94.045	142.461	142.527	16.4725	27.6179	62.6422	-1.82856	0.0062347
aldh1l1	ENSDARG00000077004	100526683	231.854	359.081	453.94	143.408	453.138	352.984	-0.138173	0.889079
aldh1l2	ENSDARG00000070230	100333269	30.7276	3.90305	10.7384	12.5966	16.3662	14.9148	-0.0512269	0.981508
aldh2.1	ENSDARG00000089924	393462	732.806	806.956	836.617	1428.26	2257.51	1454.69	1.11311	0.00543668
aldh2.2	ENSDARG00000028087	368239	270.961	237.111	244.054	187.011	840.811	541.905	1.06123	0.0985466
aldh3a1	ENSDARG00000074791	100000026	81.0091	43.9094	83.9545	67.8279	233.218	106.392	0.963105	0.205167
aldh3a2a	ENSDARG00000028259	323653	75.4223	69.2792	105.431	89.1452	155.478	107.387	0.492638	0.499058
aldh3a2b	ENSDARG00000029381	447920	30.7276	7.80611	14.6432	20.3484	4.09154	6.96024	-0.758538	0.658693
aldh3b1	ENSDARG00000013839	282559	54.0061	115.14	173.766	53.2933	52.1671	88.4945	-0.821542	0.290666
aldh3b2	ENSDARG00000035606	557008	13.9671	21.4668	14.6432	0	5.11442	7.95456	-1.94143	0.217241
aldh4a1	ENSDARG00000038207	394133	54.9372	85.8672	70.2875	113.369	188.211	146.165	1.08497	0.0506252
aldh5a1	ENSDARG00000076544	565235	42.8324	8.78187	10.7384	32.945	13.2975	5.96592	-0.25671	0.89579
aldh6a1	ENSDARG00000053485	436647	1239.35	2029.59	1649.8	2739.28	2577.67	3272.31	0.804292	0.0590317
aldh7a1	ENSDARG00000018426	334197	653.66	986.497	1021.12	1037.77	1617.18	1445.74	0.623776	0.205425
aldh8a1	ENSDARG00000036776	447801	17.6916	15.6122	28.3102	31.007	8.18308	32.8126	0.226517	0.888241
aldh9a1a.1	ENSDARG00000069100	100005587	1149.96	1855.9	2453.23	5027.02	4695.04	4476.43	1.37906	0.000975695
aldh9a1a.2	ENSDARG00000055331	100006238	8.38025	4.87882	5.85729	4.84485	4.09154	14.9148	0.318326	0.896362
aldh9a1b	ENSDARG00000037061	399481	120.117	119.043	119.098	271.312	474.618	306.251	1.55408	0.000452822
aldoaa	ENSDARG00000011665	336425	1758.92	2374.03	3204.92	1756.74	2670.75	2745.32	-0.0328164	0.969674
aldoab	ENSDARG00000034470	406496	101.494	98.5521	200.124	234.491	297.659	184.944	0.841732	0.155744
aldob	ENSDARG00000053684	321664	1171.37	2863.87	4019.08	12396	5177.84	6076.29	1.55406	0.00707249
aldoca	ENSDARG00000057661	792692	105.219	160.025	157.171	21.3173	15.3433	14.9148	-3.03228	4.34748e-08
aldocb	ENSDARG00000019702	369193	2402.34	2293.04	6089.63	979.629	808.079	782.53	-2.06901	2.11988e-05
alg1	ENSDARG00000054963	334161	213.231	103.431	156.194	181.197	222.989	151.137	0.231386	0.778693
alg10	ENSDARG00000053917	100331575	61.4552	29.2729	20.5005	7.75176	11.2517	30.8239	-1.15983	0.306106
alg11	ENSDARG00000031202	407614	138.74	105.382	130.813	103.68	84.8994	98.4377	-0.385437	0.575654
alg12	ENSDARG00000041199	569494	229.991	381.524	307.508	256.777	398.925	333.097	0.105583	0.896069
alg13	ENSDARG00000054374	557181	14.8982	10.7334	10.7384	8.72073	0	2.98296	-1.62957	0.392438
alg14	ENSDARG00000103093	450072	36.3144	25.3699	40.0248	31.007	39.8925	53.6933	0.292295	0.796963
alg2	ENSDARG00000070399	403068	161.087	205.886	162.052	144.377	281.293	191.904	0.222988	0.7784
alg3	ENSDARG00000053155	553725	77.2845	88.7945	40.0248	48.4485	77.7392	66.6195	-0.096956	0.932214
alg5	ENSDARG00000021938	445564	600.585	838.181	743.876	1186.99	1229.51	1120.6	0.696559	0.0945281
alg6	ENSDARG00000017617	445327	130.359	138.558	106.407	93.9901	104.334	143.182	-0.136369	0.875699
alg8	ENSDARG00000044627	327601	144.327	152.219	172.79	103.68	184.119	185.938	0.0131978	0.989464
alg9	ENSDARG00000012840	393598	453.465	330.784	507.632	344.953	292.545	170.029	-0.677836	0.225511
alk	ENSDARG00000095833	563509	128.497	69.2792	113.241	44.5726	26.595	20.8807	-1.7556	0.0053288
alkal1	ENSDARG00000074387	100535009	49.3504	57.57	15.6194	351.736	97.174	144.176	2.2749	0.00133899
alkal2a	ENSDARG00000091073		7.44911	7.80611	3.90486	6.78279	0	1.98864	-1.12135	1
alkal2b	ENSDARG00000042815	100329254	23.2785	39.0305	46.8583	123.059	29.6636	95.4548	1.1864	0.154289
alkbh1	ENSDARG00000071164	553720	86.5959	177.589	141.551	154.066	99.2198	174.006	0.0753763	0.940023
alkbh2	ENSDARG00000059856	569291	22.3473	34.1517	31.2389	27.1312	52.1671	30.8239	0.327532	0.783967
alkbh3	ENSDARG00000045606	792266	283.997	323.953	288.96	1958.29	1950.64	1399.01	2.56516	1.42838e-12
alkbh4	ENSDARG00000052247	553475	67.9731	98.5521	143.504	83.3314	91.0367	80.5399	-0.28201	0.748079
alkbh5	ENSDARG00000063003	570158	55.8683	48.7882	33.1913	84.3004	30.6865	60.6535	0.350032	0.746201
alkbh6	ENSDARG00000077253	317736	33.521	31.2244	23.4292	18.4104	19.4348	37.7842	-0.221805	0.87186
alkbh7	ENSDARG00000037906	550272	61.4552	73.1823	104.455	80.4245	83.8765	41.7615	-0.214191	0.832948
alkbh8	ENSDARG00000060256	556362	46.5569	80.9884	82.9783	175.384	77.7392	89.4888	0.703768	0.351806
allc	ENSDARG00000042562	436989	14.8982	10.7334	19.5243	39.7278	1.02288	21.875	0.473674	0.809652
alms1	ENSDARG00000074779	561882	498.159	614.731	394.391	563.941	703.745	584.66	0.297347	0.620712
alox12	ENSDARG00000069463	322732	116.392	124.898	204.029	97.866	185.142	71.5911	-0.328974	0.715189
alox5a	ENSDARG00000057273	567204	10.2425	14.6365	19.5243	11.6276	27.6179	12.9262	0.232025	0.892622
alox5ap	ENSDARG00000054755	337376	8.38025	15.6122	23.4292	16.4725	16.3662	37.7842	0.576184	0.686959
alox5b.1	ENSDARG00000043085	573013	5.58683	3.90305	2.92865	5.81382	0	1.98864	-0.665951	1
alox5b.2	ENSDARG00000043089	724056	15.8294	0.975763	1.95243	1.93794	0	2.98296	-1.92913	1
alox5b.3	ENSDARG00000069966	553602	27.003	13.6607	3.90486	33.9139	9.20596	9.9432	0.251394	0.901003
ALOXE3	ENSDARG00000073781	794132	13.0359	7.80611	3.90486	11.6276	2.04577	2.98296	-0.568906	0.817014
alp3	ENSDARG00000098063	100330410	12.1048	6.83034	5.85729	9.6897	8.18308	7.95456	0.05762	0.981487
alpi.1	ENSDARG00000015273	541539	243.958	384.451	449.059	418.595	954.351	565.768	0.847476	0.13279
alpi.2	ENSDARG00000053774	574009	22.3473	35.1275	8.78594	18.4104	34.7781	23.8637	0.216747	0.889678
alpk2	ENSDARG00000079637	559835	59.5929	27.3214	59.5491	47.4795	23.5263	39.7728	-0.402314	0.714684
alpk3a	ENSDARG00000078989	100321139	52.1438	50.7397	25.3816	53.2933	19.4348	21.875	-0.438054	0.716571
alpk3b	ENSDARG00000105630	100534893	65.1797	41.9578	39.0486	19.3794	13.2975	33.8069	-1.13669	0.189866
alpl	ENSDARG00000015546	393982	53.0749	52.6912	48.8108	133.718	126.838	67.6138	1.08607	0.0775711
als2a	ENSDARG00000075111	557014	68.9043	57.57	59.5491	75.5797	90.0138	84.5172	0.426592	0.57113
als2b	ENSDARG00000076924	100318899	485.123	418.603	425.63	645.334	679.195	460.37	0.425036	0.418871
alx1	ENSDARG00000062824	565176	20.4851	25.3699	23.4292	86.2383	165.707	61.6479	2.17826	0.000716048
alx4a	ENSDARG00000088332	100006399	289.584	644.004	472.488	1468.96	1470.91	1388.07	1.62219	0.000141338
alx4b	ENSDARG00000074442	497424	30.7276	13.6607	36.12	121.121	149.341	42.7558	1.95936	0.00771919
alyref	ENSDARG00000077732	560127	2909.81	3634.72	2938.41	3185.97	4210.19	3329.98	0.177718	0.77209
amacr	ENSDARG00000057435	553653	21.4162	39.0305	6.83351	5.81382	6.13731	13.9205	-1.37875	0.310198
ambn	ENSDARG00000075598	100001700	5.58683	4.87882	1.95243	22.2863	0	0.99432	0.908537	1
ambp	ENSDARG00000004296	394093	43.7635	65.3762	189.386	131.78	73.6477	95.4548	0.0122381	0.993098
ambra1a	ENSDARG00000008322	100332642	118.255	71.2307	124.956	104.649	48.0756	72.5854	-0.480241	0.556755
ambra1b	ENSDARG00000039878	559106	479.537	490.809	628.683	483.516	507.351	502.132	-0.0989419	0.884859
amd1	ENSDARG00000043856	792097	1546.62	1822.73	1957.31	1309.08	1677.53	1436.79	-0.268084	0.626161
AMDHD1	ENSDARG00000007366	402826	30.7276	18.5395	33.1913	22.2863	15.3433	0.99432	-1.09347	0.440345
amdhd2	ENSDARG00000100376	402981	159.225	172.71	245.03	292.629	367.216	273.438	0.693926	0.175996
amer1	ENSDARG00000079624	100885784	433.911	352.251	500.799	379.836	419.383	413.637	-0.0856053	0.906284
amer2	ENSDARG00000075222	100101649	748.636	526.912	396.343	129.842	172.867	152.131	-1.87843	1.43454e-05
amfra	ENSDARG00000020218	406442	513.989	765.974	661.874	1295.51	905.253	946.593	0.696863	0.129944
amfrb	ENSDARG00000105578	101884807	52.1438	76.1096	27.334	82.3624	87.9681	104.404	0.820245	0.269011
amh	ENSDARG00000014357	493624	28.8653	6.83034	14.6432	19.3794	5.11442	20.8807	-0.149993	0.940369
amigo1	ENSDARG00000079620	100144409	24.2096	15.6122	24.4054	11.6276	1.02288	6.96024	-1.70687	0.198396
amigo3	ENSDARG00000074469	100000131	51.2126	22.4426	14.6432	10.6587	8.18308	3.97728	-1.95244	0.0781292
ammecr1	ENSDARG00000012892	393553	691.836	729.871	595.491	782.928	947.191	675.143	0.25378	0.66655
amn	ENSDARG00000062947	793454	22.3473	17.5637	14.6432	9.6897	6.13731	6.96024	-1.25859	0.326516
amn1	ENSDARG00000070478	751744	136.877	135.631	211.839	148.252	173.89	96.4491	-0.21048	0.804039
amot	ENSDARG00000078335	563421	219.749	234.183	113.241	197.67	621.914	429.546	1.13873	0.0648626
amotl2a	ENSDARG00000061923	558920	1099.68	1485.11	1187.08	3608.44	6347	4516.2	1.93989	6.00768e-07
amotl2b	ENSDARG00000061948	559784	511.195	900.63	328.985	1918.56	3070.7	1776.85	1.95858	6.68587e-05
ampd1	ENSDARG00000033832	393867	27.9342	36.1032	26.3578	32.945	51.1442	35.7955	0.406876	0.702976
ampd2a	ENSDARG00000104491	100330772	38.1767	43.9094	34.1675	77.5176	34.7781	85.5115	0.767519	0.35331
ampd2b	ENSDARG00000029952	571355	212.3	149.292	276.269	224.801	151.387	146.165	-0.287943	0.705832
ampd3a	ENSDARG00000005800	556578	121.048	78.0611	22.453	36.8209	36.8238	34.8012	-1.03147	0.249826
ampd3b	ENSDARG00000032469	333997	41.9013	62.4489	78.0972	62.0141	51.1442	41.7615	-0.235042	0.819711
amph	ENSDARG00000007663	393804	747.705	379.572	881.523	21.3173	37.8467	92.4718	-3.72804	1.33491e-09
amt	ENSDARG00000010862	450000	83.8025	101.479	117.146	58.1382	168.776	100.426	0.113678	0.916036
amy2a	ENSDARG00000013856	406539	12.1048	1.95153	38.0724	7.75176	6.13731	2.98296	-1.62628	0.335814
anapc1	ENSDARG00000075687	568795	200.195	280.044	195.243	190.887	206.623	191.904	-0.19658	0.784463
anapc10	ENSDARG00000090152	798352	119.186	153.195	220.625	147.283	161.616	141.193	-0.131128	0.877923
anapc11	ENSDARG00000102531	768140	139.671	203.935	391.462	324.605	283.339	182.955	0.105933	0.91658
anapc13	ENSDARG00000078435	569473	80.0779	131.728	191.338	250.963	82.8536	100.426	0.108098	0.926415
anapc15	ENSDARG00000101285	751740	124.773	173.686	275.293	253.87	238.332	264.489	0.399661	0.560569
anapc16	ENSDARG00000013822	550576	219.749	392.257	598.42	586.227	341.643	317.188	0.0410165	0.968994
anapc2	ENSDARG00000105035	100318335	108.943	146.365	154.242	108.525	161.616	110.37	-0.106203	0.904762
anapc4	ENSDARG00000032237	494046	76.3534	95.6248	101.526	87.2073	123.769	133.239	0.331771	0.665959
anapc5	ENSDARG00000008461	322854	137.809	155.146	166.933	204.453	173.89	143.182	0.181729	0.811717
anapc7	ENSDARG00000063005	558402	57.7306	47.8124	18.5481	26.1622	65.4646	61.6479	0.303201	0.809056
and1	ENSDARG00000088514	794315	263.512	240.038	533.99	2198.59	2412.98	2864.64	2.84928	1.30384e-10
and2	ENSDARG00000079302	566702	357.557	319.075	1286.65	13244.9	13803.8	13206.6	4.35793	1.29939e-13
and3	ENSDARG00000056873	561047	121.979	88.7945	235.268	124.997	113.54	259.518	0.15933	0.88082
angel1	ENSDARG00000077567	569547	98.7007	133.68	116.17	120.152	86.9452	134.233	-0.0296622	0.977126
angel2	ENSDARG00000016743	562704	108.012	103.431	95.6691	127.904	168.776	135.228	0.491597	0.424898
angpt1	ENSDARG00000030364	114407	67.9731	82.9399	43.9297	143.408	141.158	205.824	1.33152	0.0134136
angpt2a	ENSDARG00000014946	101101687	12.1048	7.80611	12.6908	12.5966	0	6.96024	-0.73368	0.75132
angpt2b	ENSDARG00000053906	114408	15.8294	24.3941	10.7384	124.028	230.149	130.256	3.24886	4.50921e-08
angpt4	ENSDARG00000076787	571050	25.1408	31.2244	10.7384	103.68	69.5561	56.6763	1.77645	0.0131336
angptl1a	ENSDARG00000012071	544656	459.983	948.442	506.656	3293.53	3264.02	3209.67	2.35064	1.57834e-08
angptl1b	ENSDARG00000100159	334311	29.7964	18.5395	14.6432	127.904	56.2586	151.137	2.41105	0.000262239
angptl2a	ENSDARG00000024030	569092	95.9073	142.461	72.2399	286.815	335.506	282.387	1.54242	0.000919252
angptl2b	ENSDARG00000068369	503514	457.189	742.556	389.51	624.986	1406.47	768.61	0.817055	0.154289
angptl3	ENSDARG00000044365	114421	20.4851	20.491	35.1438	231.584	338.575	530.967	3.85549	6.92912e-13
angptl4	ENSDARG00000035859	492647	4287.89	6470.29	1206.6	18308.7	25806.4	13614.2	2.27051	0.000125947
angptl5	ENSDARG00000056630	566212	173.192	287.85	197.196	433.13	1521.03	773.581	2.05105	0.000151788
angptl6	ENSDARG00000020265	561927	33.521	10.7334	35.1438	180.228	59.3273	190.91	2.43823	0.000574586
angptl7	ENSDARG00000027582	450053	1880.9	1960.31	1250.53	1872.05	7270.66	3475.15	1.3092	0.0223647
ank1a	ENSDARG00000092143	449796	269.099	280.044	274.317	69.7658	26.595	20.8807	-2.81015	6.00768e-07
ank1b	ENSDARG00000074777	797662	112.668	66.3519	208.91	50.3864	6.13731	33.8069	-2.1004	0.010457
ank2a	ENSDARG00000009026	568926	283.066	209.789	244.054	42.6347	52.1671	80.5399	-2.07168	1.49665e-05
ank2b	ENSDARG00000043313	450043	3591.4	1286.06	1866.52	351.736	390.742	398.722	-2.56313	4.35783e-08
ank3a	ENSDARG00000061736	103909035	486.055	244.917	426.606	89.1452	68.5333	83.5229	-2.26258	8.67466e-07
ank3b	ENSDARG00000077582		377.111	365.911	669.684	175.384	181.051	181.961	-1.39165	0.00192106
ankar	ENSDARG00000000516	368636	32.5899	13.6607	12.6908	29.0691	1.02288	22.8694	-0.153633	0.943301
ankdd1a	ENSDARG00000098647	569271	40.039	47.8124	21.4767	35.8519	43.984	44.7444	0.187875	0.877076
ankdd1b	ENSDARG00000025866	562681	9.31139	18.5395	11.7146	7.75176	4.09154	6.96024	-1.07068	0.503137
ankef1a	ENSDARG00000019135	566413	35.3833	21.4668	17.5719	17.4415	6.13731	20.8807	-0.742552	0.573568
ankef1b	ENSDARG00000060211	100149106	23.2785	21.4668	19.5243	93.9901	52.1671	61.6479	1.69321	0.0111009
ANKFN1	ENSDARG00000060941	100333998	54.9372	73.1823	101.526	62.983	52.1671	82.5286	-0.215526	0.827259
ankfy1	ENSDARG00000061013	568480	170.398	126.849	165.957	120.152	170.822	162.074	-0.032397	0.971894
ankha	ENSDARG00000071724	571148	81.9402	45.8609	57.5967	37.7898	18.4119	17.8978	-1.32196	0.0862064
ankhb	ENSDARG00000014969	323738	443.222	317.123	544.728	227.708	202.531	211.79	-1.02335	0.0220519
ankhd1	ENSDARG00000077860	563327	969.316	1547.56	1271.03	1790.66	1861.65	1700.29	0.498888	0.295858
ankib1a	ENSDARG00000060768	566524	202.988	229.304	266.507	181.197	209.691	163.069	-0.335094	0.59006
ankib1b	ENSDARG00000076829	561277	193.677	166.856	148.385	214.142	367.216	193.892	0.606789	0.30701
ankk1	ENSDARG00000056921	100170831	24.2096	3.90305	2.92865	0	4.09154	21.875	-0.260236	0.931336
ankle2	ENSDARG00000035607	559297	92.1828	39.0305	49.787	31.976	54.2129	47.7274	-0.436255	0.663776
ankmy1	ENSDARG00000062702	568987	28.8653	31.2244	33.1913	29.0691	32.7323	45.7387	0.2053	0.865901
ankmy2a	ENSDARG00000005948	334389	137.809	153.195	155.218	112.401	181.051	156.108	0.0104764	0.991172
ankra2	ENSDARG00000035399	406403	281.204	297.608	574.015	281.001	351.872	299.29	-0.306466	0.671212
ankrd10a	ENSDARG00000037100	393955	334.279	234.183	247.959	82.3624	205.6	149.148	-0.902045	0.118866
ankrd10b	ENSDARG00000004771	559527	273.755	281.996	338.747	267.436	437.795	355.967	0.246411	0.714446
ankrd11	ENSDARG00000051886	327352	4579.34	6482.97	4791.27	7006.62	5590.06	5828.71	0.216902	0.714717
ankrd12	ENSDARG00000052419	393119	1672.33	2529.18	1624.42	2483.47	1768.57	2056.25	0.114808	0.873336
ankrd13a	ENSDARG00000061901	556837	27.003	25.3699	25.3816	43.6036	30.6865	41.7615	0.578129	0.554338
ankrd13b	ENSDARG00000014652	568981	61.4552	34.1517	31.2389	13.5656	22.5035	9.9432	-1.46536	0.100179
ankrd13c	ENSDARG00000103831	325167	864.097	880.139	1015.26	769.362	1029.02	747.729	-0.116157	0.86412
ankrd13d	ENSDARG00000098140	562931	129.428	62.4489	174.743	64.921	75.6935	80.5399	-0.729441	0.312639
ankrd16	ENSDARG00000003822	550225	52.1438	45.8609	73.2162	42.6347	87.9681	77.557	0.281335	0.779326
ankrd1a	ENSDARG00000075263	100151027	49.3504	81.9641	61.5016	23.2553	69.5561	49.716	-0.436847	0.666533
ankrd1b	ENSDARG00000076192	564159	4.65569	3.90305	7.80972	0	4.09154	4.9716	-0.855868	1
ankrd22	ENSDARG00000002298	393244	52.1438	129.777	70.2875	105.618	54.2129	35.7955	-0.365373	0.735766
ankrd24	ENSDARG00000062103	565326	80.0779	82.9399	60.5254	60.0761	83.8765	44.7444	-0.245133	0.798519
ankrd27	ENSDARG00000089207	386887	17.6916	24.3941	14.6432	4.84485	19.4348	18.8921	-0.395746	0.812168
ankrd28b	ENSDARG00000009023	560747	497.228	676.204	587.682	625.955	738.523	667.189	0.206209	0.73919
ankrd29	ENSDARG00000057159	553798	46.5569	21.4668	56.6205	8.72073	6.13731	5.96592	-2.58013	0.00382515
ankrd31	ENSDARG00000052731	550610	4.65569	8.78187	2.92865	6.78279	0	10.9375	0.117033	1
ankrd33aa	ENSDARG00000055638	557568	126.635	169.783	49.787	37.7898	30.6865	79.5456	-1.2257	0.113748
ankrd33ab	ENSDARG00000002508	569518	73.56	66.3519	33.1913	12.5966	9.20596	6.96024	-2.58841	0.00082885
ankrd33ba	ENSDARG00000058357	568270	53.0749	13.6607	8.78594	10.6587	16.3662	15.9091	-0.817475	0.572813
ankrd33bb	ENSDARG00000015589	557905	21.4162	10.7334	5.85729	3.87588	5.11442	3.97728	-1.55402	0.340177
ankrd34ba	ENSDARG00000077086	560938	21.4162	8.78187	0.976215	3.87588	2.04577	14.9148	-0.582812	0.818165
ankrd34bb	ENSDARG00000061641	565548	29.7964	31.2244	19.5243	9.6897	27.6179	25.8523	-0.352569	0.802499
ankrd37	ENSDARG00000056376	793783	27.003	28.2971	16.5957	12.5966	11.2517	6.96024	-1.22255	0.280179
ankrd39	ENSDARG00000041350	100000333	17.6916	14.6365	25.3816	32.945	34.7781	16.9034	0.552453	0.654954
ankrd40	ENSDARG00000076490	100005118	271.893	197.104	295.793	262.591	413.245	279.404	0.320541	0.632267
ankrd44	ENSDARG00000026028	561373	29.7964	15.6122	19.5243	23.2553	8.18308	10.9375	-0.614404	0.667464
ankrd45	ENSDARG00000011326	553808	22.3473	18.5395	39.0486	2.90691	2.04577	4.9716	-3.00793	0.00676623
ankrd46a	ENSDARG00000044328	100329397	424.599	361.032	540.823	615.296	822.399	510.086	0.554203	0.290301
ankrd46b	ENSDARG00000015780	402888	160.156	121.97	210.863	113.369	181.051	189.915	-0.0257941	0.980051
ankrd49	ENSDARG00000023508	550246	52.1438	65.3762	66.3827	56.2003	34.7781	54.6876	-0.335265	0.721567
ANKRD50	ENSDARG00000045666		222.542	177.589	127.884	166.663	435.749	297.302	0.768353	0.22128
ankrd50l	ENSDARG00000007077	449857	105.219	125.873	174.743	187.98	220.943	181.961	0.542213	0.362077
ankrd52a	ENSDARG00000036826	553206	58.6618	69.2792	18.5481	61.0451	20.4577	22.8694	-0.488016	0.699956
ankrd54	ENSDARG00000055743	436851	295.171	298.584	368.033	165.694	457.229	294.319	-0.0687015	0.942825
ankrd55	ENSDARG00000099182	100006755	65.1797	29.2729	117.146	57.1692	12.2746	49.716	-0.827166	0.440554
ANKRD66	ENSDARG00000090489	101886816	2.79342	1.95153	12.6908	0	0	4.9716	-1.809	1
ankrd6a	ENSDARG00000057790	100330565	64.2486	13.6607	2.92865	11.6276	5.11442	8.94888	-1.65389	0.265707
ankrd6b	ENSDARG00000029370	378477	32.5899	38.0548	6.83351	46.5106	22.5035	22.8694	0.246291	0.876685
ankrd9	ENSDARG00000028804	492328	22.3473	40.9821	57.5967	35.8519	9.20596	22.8694	-0.829338	0.456126
anks1aa	ENSDARG00000062396	100334911	7.44911	11.7092	0	24.2242	5.11442	7.95456	0.961985	0.666533
anks1ab	ENSDARG00000078901	100003659	54.9372	40.9821	33.1913	8.72073	5.11442	15.9091	-2.11702	0.0146451
anks1b	ENSDARG00000003512	565408	609.896	425.433	933.262	1196.68	840.811	759.661	0.506868	0.404602
anks3	ENSDARG00000038557	100136846	113.599	143.437	66.3827	119.183	161.616	152.131	0.420443	0.574106
anks4b	ENSDARG00000036846	431735	126.635	82.9399	110.312	32.945	36.8238	45.7387	-1.47004	0.0094146
ankzf1	ENSDARG00000041904	553307	175.985	213.692	284.079	257.746	334.483	291.336	0.391211	0.520953
anln	ENSDARG00000060917	562517	312.863	319.075	170.838	123.059	462.344	408.666	0.308032	0.748133
ano1	ENSDARG00000102335	407698	30.7276	3.90305	12.6908	54.2623	68.5333	53.6933	1.89523	0.0334747
ano10a	ENSDARG00000057736	566425	286.791	541.549	521.299	627.893	1123.13	1033.1	1.04474	0.0340706
ano10b	ENSDARG00000018159	565195	209.506	229.304	253.816	403.092	910.367	452.416	1.35014	0.00548256
ano11	ENSDARG00000077327	100007289	48.4192	41.9578	45.8821	29.0691	12.2746	18.8921	-1.17579	0.162001
ano2	ENSDARG00000101363	566373	367.8	152.219	157.171	57.1692	33.7552	67.6138	-2.09446	0.000318162
ANO2oneOfMany	ENSDARG00000003210		15.8294	15.6122	5.85729	1.93794	0	0	-4.24367	0.0301219
ano3	ENSDARG00000058015	553392	135.015	85.8672	85.907	123.059	66.4875	25.8523	-0.509935	0.606397
ano5a	ENSDARG00000015731	100534737	21.4162	15.6122	19.5243	39.7278	13.2975	8.94888	0.13353	0.940463
ano5b	ENSDARG00000036147	560102	438.566	334.687	272.364	1061.02	1153.81	1248.87	1.72774	5.79242e-06
ano6	ENSDARG00000061544	100535437	47.4881	54.6428	43.9297	42.6347	15.3433	18.8921	-0.92403	0.309257
ANO7	ENSDARG00000104834	556876	10.2425	6.83034	1.95243	8.72073	2.04577	8.94888	0.0513395	0.986387
ano8a	ENSDARG00000076265	562947	61.4552	20.491	25.3816	9.6897	4.09154	23.8637	-1.51144	0.184532
ano8b	ENSDARG00000077229	562782	97.7696	89.7702	101.526	21.3173	26.595	21.875	-2.0511	0.000261144
ano9a	ENSDARG00000078941	100126106	57.7306	64.4004	49.787	29.0691	47.0527	41.7615	-0.545187	0.523276
ano9b	ENSDARG00000079324	559809	58.6618	55.6185	144.48	34.8829	36.8238	41.7615	-1.18899	0.103728
anos1a	ENSDARG00000012896	30630	394.803	440.069	559.371	380.805	419.383	346.023	-0.282564	0.639013
anos1b	ENSDARG00000004932	30652	266.306	281.02	204.029	363.364	872.52	639.348	1.3193	0.00653461
anp32a	ENSDARG00000006487	335907	1240.28	1107.49	1321.8	819.749	1169.16	969.462	-0.310877	0.566957
anp32b	ENSDARG00000023330	322000	1456.3	2051.05	2091.05	1441.83	2427.3	2080.12	0.087683	0.907261
anp32e	ENSDARG00000054804	406562	3520.64	2125.21	1844.07	1444.73	2075.43	2004.55	-0.439114	0.449484
ANPEP	ENSDARG00000097285	100004744	10.2425	10.7334	7.80972	34.8829	56.2586	10.9375	1.82529	0.0833099
anpepa	ENSDARG00000041083	558452	14.8982	32.2002	55.6443	9.6897	16.3662	17.8978	-1.22496	0.249825
anpepb	ENSDARG00000103878	322533	21.4162	18.5395	18.5481	14.5345	15.3433	11.9318	-0.485148	0.733124
antxr1a	ENSDARG00000025672	793153	18.6228	11.7092	14.6432	37.7898	34.7781	26.8466	1.14334	0.223705
antxr1b	ENSDARG00000074075	556289	23.2785	13.6607	14.6432	40.6967	72.6248	32.8126	1.50013	0.0701559
antxr1c	ENSDARG00000063612	563907	620.139	878.187	487.132	3835.18	3954.47	3611.37	2.52164	3.47869e-11
antxr1d	ENSDARG00000060845	563132	12.1048	31.2244	13.667	3.87588	16.3662	1.98864	-1.36188	0.377358
antxr2a	ENSDARG00000104118	557239	175.054	199.056	154.242	722.852	1182.45	622.445	2.2582	1.04072e-07
antxr2b	ENSDARG00000063011	560841	4.65569	17.5637	4.88108	5.81382	5.11442	12.9262	-0.182391	0.940579
anxa11a	ENSDARG00000077383	368215	581.962	1227.51	1337.42	2047.43	3001.14	2372.45	1.23776	0.00849123
anxa11b	ENSDARG00000002632	353365	1292.42	1194.33	1326.68	2415.64	4885.3	3606.4	1.51611	0.00018578
anxa13	ENSDARG00000013976	81880	699.285	550.331	747.781	2398.2	3185.26	2153.7	1.95364	1.38051e-07
anxa13l	ENSDARG00000013613	554118	336.141	310.293	288.96	121.121	95.1283	87.5002	-1.62241	0.000103764
anxa1a	ENSDARG00000026726	334724	600.585	1087	1332.53	2129.8	2257.51	2254.12	1.13698	0.010716
anxa1b	ENSDARG00000100095	353358	183.434	267.359	815.14	241.274	244.469	364.916	-0.573386	0.498254
anxa1c	ENSDARG00000104359	494158	75.4223	95.6248	264.554	68.7969	82.8536	155.114	-0.505592	0.599028
ANXA1oneOfMany	ENSDARG00000098481	550268	49.3504	99.5279	225.506	85.2694	91.0367	112.358	-0.374635	0.714357
anxa2a	ENSDARG00000003216	325557	892.962	1972.99	2133.03	1667.6	1924.05	1438.78	0.00909117	0.992717
anxa2b	ENSDARG00000053625	799806	19.5539	18.5395	210.863	17.4415	5.11442	0	-3.46294	0.19449
anxa3a	ENSDARG00000009196	447893	30.7276	61.4731	235.268	43.6036	22.5035	72.5854	-1.23862	0.212167
anxa3b	ENSDARG00000044254	492336	416.219	423.481	374.867	726.727	1402.37	1050	1.38807	0.000864552
anxa4	ENSDARG00000036456	353362	622.001	1200.19	1306.18	2032.9	2892.72	2209.38	1.18957	0.0088583
anxa5a	ENSDARG00000026406	557578	53.0749	136.607	99.574	75.5797	41.9383	22.8694	-1.04165	0.197082
anxa5b	ENSDARG00000016470	337132	953.486	898.678	1335.46	1197.65	2287.17	1648.58	0.687402	0.172749
anxa6	ENSDARG00000013335	353363	44.6947	101.479	75.1686	107.556	144.227	58.6649	0.488432	0.579656
aoc1	ENSDARG00000061355	555401	43.7635	22.4426	45.8821	25.1932	11.2517	33.8069	-0.673258	0.549752
aoc2	ENSDARG00000014646	541429	917.172	1942.75	2161.34	8577.32	9269.38	11251.7	2.53488	5.53522e-09
aox5	ENSDARG00000071475	64265	57.7306	59.5216	129.837	102.711	82.8536	76.5627	0.0859169	0.938131
aox6	ENSDARG00000020054	570457	108.943	147.34	68.3351	172.477	292.545	228.694	1.09535	0.0479013
ap1ar	ENSDARG00000031496	100332265	283.997	197.104	239.173	165.694	173.89	174.006	-0.488152	0.379578
ap1b1	ENSDARG00000020621	562166	1022.39	970.885	1197.82	676.341	1058.69	941.621	-0.253693	0.676014
ap1g1	ENSDARG00000102394	324466	673.213	1000.16	1101.17	1155.98	1033.11	933.667	0.170673	0.80081
ap1g2	ENSDARG00000054337	100007877	297.033	288.826	441.249	219.956	421.428	341.052	-0.0643027	0.942079
ap1m1	ENSDARG00000096249	100330411	745.842	850.866	1050.41	912.77	1346.12	1241.91	0.403257	0.448719
ap1m2	ENSDARG00000096454	403021	98.7007	139.534	192.314	50.3864	30.6865	49.716	-1.71776	0.00215497
ap1m3	ENSDARG00000039512	445244	20.4851	8.78187	12.6908	13.5656	9.20596	27.841	0.269565	0.879725
ap1s1	ENSDARG00000056803	393279	276.548	180.516	426.606	153.097	155.478	149.148	-0.949001	0.0797304
ap1s2	ENSDARG00000058504	327237	544.716	685.962	747.781	435.068	1290.88	961.508	0.441797	0.526514
ap1s3a	ENSDARG00000110439	550415	4.65569	6.83034	12.6908	1.93794	1.02288	1.98864	-2.28445	1
ap1s3b	ENSDARG00000027966	447897	84.7336	150.268	257.721	47.4795	6.13731	25.8523	-2.62948	0.000590516
ap2a1	ENSDARG00000054320	558153	936.726	1188.48	1432.11	1290.67	1696.97	1365.2	0.291185	0.616273
ap2b1	ENSDARG00000035152	334632	1174.17	1018.7	1289.58	997.07	1926.09	1737.08	0.420246	0.463085
ap2m1a	ENSDARG00000002790	321051	2228.22	2438.43	3114.13	3204.38	4613.21	3307.11	0.515779	0.283022
ap2m1b	ENSDARG00000033899	394001	203.919	101.479	90.788	91.0832	227.08	108.381	0.105496	0.925192
ap2s1	ENSDARG00000026967	100148085	866.89	1076.27	1718.14	1227.68	1652.98	1297.59	0.190571	0.793408
ap3b1a	ENSDARG00000100082	563316	86.5959	99.5279	54.6681	182.166	162.639	115.341	0.934216	0.109872
AP3B2	ENSDARG00000105296	100000165	130.359	84.8914	172.79	31.976	4.09154	2.98296	-3.30748	0.000138522
ap3d1	ENSDARG00000071424	563359	190.883	226.377	233.316	241.274	218.897	200.853	0.0231928	0.978747
ap3m1	ENSDARG00000029928	266798	120.117	149.292	175.719	235.46	459.275	336.08	1.21152	0.0124385
ap3m2	ENSDARG00000016128	415244	360.351	327.857	559.371	76.5486	152.41	108.381	-1.88745	7.51664e-05
ap3s2	ENSDARG00000039882	436812	258.857	231.256	341.675	263.56	242.424	196.875	-0.242872	0.724516
ap4b1	ENSDARG00000013726	393309	90.3205	79.0368	55.6443	94.9591	102.288	87.5002	0.339219	0.671587
ap4e1	ENSDARG00000103684	570467	108.012	126.849	108.36	79.4555	240.378	116.335	0.345179	0.699458
ap4m1	ENSDARG00000056871	436945	76.3534	65.3762	82.9783	78.4866	80.8079	72.5854	0.0452434	0.964866
ap4s1	ENSDARG00000054220	368852	69.8354	115.14	205.981	199.608	199.462	166.051	0.532083	0.472862
ap5b1	ENSDARG00000078805	100148772	117.324	98.5521	105.431	80.4245	90.0138	62.6422	-0.463463	0.503987
ap5m1	ENSDARG00000031533	553681	52.1438	58.5458	101.526	51.3554	109.449	85.5115	0.214799	0.837135
ap5s1	ENSDARG00000076755	556111	67.9731	92.6975	90.788	69.7658	97.174	122.301	0.202042	0.824258
ap5z1	ENSDARG00000078111	100537934	51.2126	50.7397	42.9535	18.4104	62.396	40.7671	-0.254853	0.832948
apaf1	ENSDARG00000021239	58131	127.566	194.177	157.171	319.76	256.744	223.722	0.741032	0.150258
apba1a	ENSDARG00000103848	100003938	136.877	110.261	151.313	75.5797	45.0069	51.7047	-1.20874	0.0285702
apba1b	ENSDARG00000074328	565507	664.833	374.693	344.604	62.983	98.1969	90.4831	-2.46013	1.6228e-07
apba2a	ENSDARG00000063314	100330365	88.4582	58.5458	84.9307	29.0691	61.3731	65.6251	-0.572595	0.495748
apba2b	ENSDARG00000060639	327160	538.198	210.765	650.16	56.2003	75.6935	51.7047	-2.93039	4.72281e-08
APBA3	ENSDARG00000090675	449850	135.946	145.389	163.028	201.546	283.339	207.813	0.640397	0.223042
apbb1	ENSDARG00000076560	565164	68.9043	48.7882	41.9773	33.9139	39.8925	48.7217	-0.382847	0.693493
apbb1ip	ENSDARG00000016505	393607	38.1767	43.9094	36.12	11.6276	9.20596	6.96024	-2.08743	0.0120238
apbb2b	ENSDARG00000099995	564990	58.6618	75.1338	66.3827	193.794	82.8536	97.4434	0.90294	0.174132
apbb3	ENSDARG00000053771	101883158	15.8294	7.80611	24.4054	9.6897	2.04577	0.99432	-1.91026	0.232625
apc	ENSDARG00000058868	386762	2312.02	1548.54	2563.54	1018.39	1079.14	978.411	-1.06249	0.00760285
apc2	ENSDARG00000063007	565771	216.955	75.1338	117.146	34.8829	16.3662	9.9432	-2.73982	9.55324e-05
apcdd1l	ENSDARG00000075557	100001408	173.192	143.437	112.265	176.353	326.3	250.569	0.81189	0.139389
apeh	ENSDARG00000008703	100333019	26.0719	48.7882	18.5481	35.8519	34.7781	47.7274	0.342004	0.776804
apela	ENSDARG00000094729	100536023	18.6228	20.491	32.2151	57.1692	27.6179	82.5286	1.23126	0.146137
apex1	ENSDARG00000045843	406730	499.09	541.549	832.712	189.918	319.14	394.745	-1.05164	0.0370057
apex2	ENSDARG00000008472	393115	185.297	179.54	210.863	198.639	204.577	162.074	-0.0263108	0.976463
aph1b	ENSDARG00000005612	386808	443.222	470.318	620.873	479.64	474.618	457.387	-0.120228	0.862606
api5	ENSDARG00000033597	321676	736.531	817.69	791.711	548.437	926.733	890.911	0.0122629	0.988572
apip	ENSDARG00000003132	447941	175.985	291.753	386.581	381.774	291.522	287.359	0.169612	0.83616
apln	ENSDARG00000053279	798375	1557.8	1839.31	1984.65	4298.35	4709.36	4008.11	1.27414	0.000240306
aplnr2	ENSDARG00000004447	793710	48.4192	22.4426	52.7156	17.4415	13.2975	37.7842	-0.850664	0.421785
aplnra	ENSDARG00000002172	561935	332.417	526.912	394.391	880.794	1184.5	887.928	1.23615	0.00246218
aplnrb	ENSDARG00000036670	565492	94.9762	99.5279	110.312	25.1932	48.0756	41.7615	-1.40705	0.0166536
aplp1	ENSDARG00000098368	404233	1701.19	763.047	1791.36	204.453	333.46	400.711	-2.1809	7.30286e-06
aplp2	ENSDARG00000054864	796801	2155.59	2050.08	2197.46	2632.69	1824.83	1805.69	-0.0318428	0.966241
apmap	ENSDARG00000017422	266637	399.459	362.008	386.581	245.149	466.435	433.524	-0.00393074	0.995615
apnl	ENSDARG00000090900	100002992	13.9671	14.6365	31.2389	1.93794	11.2517	14.9148	-1.09195	0.462783
apoa1a	ENSDARG00000012076	30355	13.0359	121.97	999.645	36.8209	11.2517	7.95456	-4.33936	0.0513539
apoa1b	ENSDARG00000101324	100101640	529.818	1181.65	3644.21	736.417	59.3273	1235.94	-1.39836	0.502368
apoa2	ENSDARG00000015866	322327	275.617	618.634	2257.01	387.588	15.3433	669.178	-1.55543	0.512971
apoa4a	ENSDARG00000101160	550608	13.9671	40.9821	15.6194	4.84485	11.2517	7.95456	-1.55449	0.201827
apoa4b.1	ENSDARG00000040298	322543	25.1408	95.6248	584.753	23.2553	0	46.7331	-3.3332	0.268819
apoa4b.2	ENSDARG00000020866	570354	21.4162	71.2307	466.631	12.5966	5.11442	14.9148	-4.09759	6.51389e-05
apoba	ENSDARG00000042780	566465	121.048	79.0368	122.027	30.0381	30.6865	56.6763	-1.45626	0.0172542
apobb.1	ENSDARG00000022767	321166	139.671	150.268	579.872	51.3554	40.9154	112.358	-2.08737	0.00371634
apobb.2	ENSDARG00000075016	100330435	45.6258	38.0548	28.3102	25.1932	32.7323	20.8807	-0.508131	0.633072
apobec2a	ENSDARG00000018881	503736	21.4162	17.5637	11.7146	2.90691	4.09154	22.8694	-0.763869	0.668839
apobec2b	ENSDARG00000113992	567047	8.38025	21.4668	14.6432	4.84485	36.8238	27.841	0.643399	0.686462
apoc1	ENSDARG00000092170	570638	173.192	453.73	1451.63	171.508	16.3662	208.807	-2.38938	0.169501
apoc2	ENSDARG00000092155	568972	70.7666	73.1823	306.532	21.3173	18.4119	33.8069	-2.61437	0.000497662
apoc4	ENSDARG00000075614	570390	1.86228	3.90305	11.7146	7.75176	0	0.99432	-0.991441	1
apoda.1	ENSDARG00000060345	767642	23.2785	47.8124	80.0497	19.3794	20.4577	21.875	-1.29149	0.139789
apoda.2	ENSDARG00000060350	100148022	24.2096	8.78187	87.8594	0	1.02288	0	-6.81965	1.47442e-05
apodb	ENSDARG00000057437	567972	33.521	52.6912	261.626	78.4866	25.5721	99.432	-0.772623	0.513635
apoea	ENSDARG00000102004	553587	13.0359	28.2971	132.765	35.8519	2.04577	10.9375	-1.83073	0.159879
apoeb	ENSDARG00000040295	30314	2722.65	6529.81	10718.8	1790.66	2154.19	1726.14	-1.81625	0.000529321
apof	ENSDARG00000090980	793418	143.395	241.014	644.302	5577.39	5237.17	3620.32	3.81088	4.60329e-11
apol1	ENSDARG00000007425	560340	85.6648	99.5279	131.789	199.608	313.003	297.302	1.35353	0.00417751
apom	ENSDARG00000076838	569714	7.44911	20.491	50.7632	29.0691	0	28.8353	-0.440574	0.837893
apooa	ENSDARG00000104696	641319	47.4881	121.97	86.8832	52.3244	23.5263	39.7728	-1.14692	0.126218
apoob	ENSDARG00000026444	449837	179.71	78.0611	177.671	133.718	392.788	173.012	0.683322	0.381466
apool	ENSDARG00000039374	541537	69.8354	102.455	123.003	89.1452	144.227	125.284	0.280555	0.740082
apopt1	ENSDARG00000092473	798687	111.737	163.928	185.481	215.111	144.227	192.898	0.260663	0.733847
appa	ENSDARG00000104279	58083	4929.45	4020.15	5195.42	3498.95	3444.05	2915.35	-0.520878	0.228146
appb	ENSDARG00000055543	170846	2755.24	2710.67	4252.39	5769.25	5634.05	5099.87	0.763981	0.0721015
appbp2	ENSDARG00000007566	322995	238.372	163.928	72.2399	117.245	349.826	283.381	0.660604	0.420666
appl2	ENSDARG00000078139	100000135	612.689	755.241	768.282	762.579	875.589	668.183	0.110581	0.871353
aprt	ENSDARG00000003519	393641	89.3893	197.104	182.552	99.8039	161.616	227.699	0.0606617	0.955586
aptx	ENSDARG00000027143	405797	58.6618	32.2002	30.2627	37.7898	75.6935	36.7899	0.309184	0.788454
aqp10a	ENSDARG00000007086	436621	11.1737	11.7092	10.7384	3.87588	0	2.98296	-2.28582	0.206972
aqp10b	ENSDARG00000058678	100034395	13.0359	1.95153	0	0	1.02288	0.99432	-2.90342	1
aqp11	ENSDARG00000100555	553476	235.578	196.128	226.482	556.189	695.561	398.722	1.32615	0.00174163
aqp12	ENSDARG00000043279	436844	26.0719	28.2971	57.5967	39.7278	12.2746	33.8069	-0.381866	0.772801
aqp1a.1	ENSDARG00000023713	335821	766.327	523.985	1467.25	123.059	83.8765	96.4491	-3.18377	2.11746e-10
aqp1a.2	ENSDARG00000091027	559284	4.65569	20.491	51.7394	8.72073	0	1.98864	-2.83465	0.0688295
aqp3a	ENSDARG00000003808	406777	873.408	1922.25	3168.8	7273.09	10624.7	8552.15	2.14884	2.45736e-05
aqp4	ENSDARG00000010565	445293	17.6916	21.4668	3.90486	8.72073	1.02288	0	-2.13714	0.270025
aqp7	ENSDARG00000026787	334529	21.4162	4.87882	12.6908	21.3173	36.8238	14.9148	0.902981	0.500201
aqp8a.1	ENSDARG00000045141	447923	22.3473	51.7155	128.86	68.7969	15.3433	11.9318	-1.07662	0.36329
aqp8a.2	ENSDARG00000071592	563130	9.31139	18.5395	54.6681	0	2.04577	2.98296	-4.04337	0.00338687
aqp8b	ENSDARG00000089749	555598	14.8982	7.80611	16.5957	2.90691	0	5.96592	-2.14336	0.220084
aqp9b	ENSDARG00000053480	570191	3596.06	891.848	197.196	167.632	517.58	325.143	-2.21328	0.173259
aqr	ENSDARG00000016775	393436	130.359	200.032	107.384	161.818	129.906	151.137	0.0169633	0.986593
ar	ENSDARG00000067976	100005148	58.6618	79.0368	64.4302	107.556	55.2358	49.716	0.0732433	0.948917
araf	ENSDARG00000054533	403063	648.073	702.55	699.947	823.624	1333.84	1385.09	0.788728	0.0755955
arap1a	ENSDARG00000062221	571767	23.2785	29.2729	50.7632	35.8519	19.4348	34.8012	-0.19599	0.882385
arap3	ENSDARG00000076801	558931	172.261	143.437	119.098	361.426	628.051	397.728	1.67333	0.000157619
arcn1a	ENSDARG00000002792	266982	260.719	253.699	394.391	322.667	453.138	346.023	0.30378	0.644411
arcn1b	ENSDARG00000031214	399661	533.543	507.397	592.563	691.845	1552.74	1194.18	1.07384	0.0207238
areg	ENSDARG00000076853	101884611	89.3893	57.57	75.1686	15.5035	12.2746	18.8921	-2.25037	0.00053296
AREL1	ENSDARG00000100359	100332031	170.398	132.704	153.266	65.89	190.257	146.165	-0.182609	0.848679
arf1	ENSDARG00000009484	114428	675.076	1058.7	963.525	1699.57	1734.81	1380.12	0.835945	0.0481906
arf2a	ENSDARG00000014763	399477	2541.08	2923.39	3699.86	3770.26	5135.9	3964.36	0.489974	0.306573
arf2b	ENSDARG00000016393	327026	1135.06	1422.66	1222.22	1268.38	1568.08	1450.71	0.181661	0.763461
arf3a	ENSDARG00000070539	445047	81.0091	50.7397	164.004	5.81382	2.04577	2.98296	-4.76227	8.53769e-09
arf3b	ENSDARG00000036998	368822	12.1048	8.78187	1.95243	0	0	0	-5.37906	1
arf4a	ENSDARG00000045989	445196	188.09	277.117	216.72	384.681	490.985	468.325	0.978944	0.0241934
arf4b	ENSDARG00000100339	550402	18.6228	85.8672	5.85729	33.9139	65.4646	48.7217	0.424789	0.785214
arf5	ENSDARG00000070472	378724	1524.27	2114.48	1878.24	2577.46	3534.07	2901.43	0.708127	0.0930856
ARF5oneOfMany	ENSDARG00000073876	100333040	40.9701	64.4004	61.5016	42.6347	45.0069	46.7331	-0.311968	0.749653
arf6a	ENSDARG00000101626	336063	524.231	857.696	720.447	1109.47	1057.66	970.457	0.577746	0.22169
arf6b	ENSDARG00000052928	100003206	548.441	814.763	994.764	1052.3	1366.57	957.53	0.518002	0.334642
arfgap1	ENSDARG00000101616	100149572	13.0359	14.6365	1.95243	2.90691	6.13731	19.8864	-0.0354593	0.989734
arfgap2	ENSDARG00000067601	641490	126.635	165.88	69.3113	147.283	222.989	170.029	0.578169	0.402807
arfgap3	ENSDARG00000097583	402889	127.566	161.977	225.506	126.935	148.318	160.086	-0.242385	0.755106
arfgef1	ENSDARG00000063474	100329953	650.866	669.374	790.735	603.668	642.371	720.882	-0.10195	0.878772
arfgef2	ENSDARG00000074702	100334572	164.812	106.358	64.4302	91.0832	141.158	125.284	0.0903974	0.931336
arfgef3	ENSDARG00000077656	562652	71.6977	35.1275	26.3578	49.4175	13.2975	17.8978	-0.723376	0.5351
arfip1	ENSDARG00000070055	100003895	123.841	150.268	195.243	172.477	356.987	232.671	0.6993	0.241996
arfip2a	ENSDARG00000059244	449664	379.905	200.032	177.671	214.142	502.236	354.972	0.499383	0.495748
arfip2b	ENSDARG00000056664	550342	0	0	0.976215	19.3794	0	0.99432	4.30425	1
arfrp1	ENSDARG00000057857	503602	44.6947	38.0548	43.9297	24.2242	33.7552	41.7615	-0.345556	0.748511
arg1	ENSDARG00000057429	570368	7.44911	7.80611	1.95243	13.5656	0	1.98864	-0.142355	1
arg2	ENSDARG00000039269	322614	413.426	804.029	208.91	485.454	266.973	282.387	-0.462792	0.578998
arglu1a	ENSDARG00000019223	406834	1686.29	1295.81	1973.91	1436.01	1534.33	1033.1	-0.307954	0.601204
arglu1b	ENSDARG00000018319	393131	871.546	518.13	902.999	466.075	574.861	543.893	-0.532808	0.31093
arhgap1	ENSDARG00000024324	550478	853.854	958.2	1471.16	1037.77	1391.12	1076.85	0.0946231	0.901137
arhgap10	ENSDARG00000078326	692277	259.788	268.335	279.198	404.06	539.06	466.336	0.803857	0.05985
arhgap11a	ENSDARG00000100019	406608	232.785	286.874	175.719	118.214	271.064	189.915	-0.264182	0.749075
arhgap12a	ENSDARG00000008548	563267	281.204	365.911	255.768	100.773	115.586	154.12	-1.28521	0.0047674
arhgap12b	ENSDARG00000026482	393848	662.971	511.3	483.227	239.336	335.506	204.83	-1.08837	0.0134619
arhgap15	ENSDARG00000062349	100003547	10.2425	20.491	42.9535	0	11.2517	7.95456	-1.94352	0.187437
arhgap17a	ENSDARG00000020488	550254	40.039	47.8124	43.9297	66.8589	41.9383	59.6592	0.355073	0.707411
arhgap17b	ENSDARG00000062263	100141341	53.0749	52.6912	97.6215	281.001	360.055	220.739	2.08354	2.29375e-05
arhgap18	ENSDARG00000074740	100004252	32.5899	36.1032	18.5481	57.1692	20.4577	43.7501	0.477164	0.682154
arhgap19	ENSDARG00000083189	100537002	16.7605	17.5637	1.95243	23.2553	16.3662	19.8864	0.713206	0.657629
arhgap20	ENSDARG00000089326	796434	133.153	105.382	100.55	74.6107	37.8467	64.6308	-0.9365	0.1345
arhgap20b	ENSDARG00000093708		12.1048	11.7092	9.76215	28.1001	6.13731	18.8921	0.663601	0.67581
arhgap21a	ENSDARG00000104295	101883923	272.824	182.468	243.078	318.791	154.456	166.051	-0.12725	0.886322
arhgap21b	ENSDARG00000075673	326745	609.896	731.823	893.237	553.282	754.889	627.416	-0.207488	0.749348
arhgap22	ENSDARG00000021255	562503	22.3473	11.7092	23.4292	20.3484	6.13731	7.95456	-0.736809	0.625591
ARHGAP22oneOfMany	ENSDARG00000076434	555573	44.6947	44.8851	55.6443	32.945	8.18308	7.95456	-1.5616	0.0956704
arhgap23a	ENSDARG00000052950	100006233	803.573	1100.66	1324.72	905.987	1153.81	889.917	-0.13047	0.854302
arhgap23b	ENSDARG00000026840	562244	132.222	88.7945	23.4292	48.4485	2.04577	9.9432	-2.01352	0.0779259
arhgap24	ENSDARG00000100973	100005116	60.524	55.6185	30.2627	27.1312	45.0069	58.6649	-0.163583	0.892881
arhgap25	ENSDARG00000061784	562468	8.38025	10.7334	22.453	20.3484	4.09154	7.95456	-0.355872	0.859782
arhgap27	ENSDARG00000104255	564211	54.9372	38.0548	27.334	15.5035	13.2975	22.8694	-1.21992	0.173702
arhgap27l	ENSDARG00000061798	566523	115.461	207.838	369.009	102.711	191.279	234.66	-0.389031	0.665924
arhgap28	ENSDARG00000101350		19.5539	22.4426	4.88108	23.2553	61.3731	40.7671	1.41778	0.162291
arhgap29a	ENSDARG00000026329	564805	133.153	95.6248	98.5978	275.187	541.106	423.58	1.92059	2.63016e-05
arhgap29b	ENSDARG00000017748	378998	326.83	425.433	558.395	612.389	869.452	774.576	0.783818	0.0959331
arhgap31	ENSDARG00000059472	101885883	79.1468	102.455	28.3102	126.935	91.0367	195.881	0.979261	0.19517
arhgap32a	ENSDARG00000075334	562449	203.919	160.025	288.96	64.921	36.8238	48.7217	-2.11635	3.09737e-05
arhgap32b	ENSDARG00000074184	569434	139.671	184.419	165.957	121.121	76.7163	94.4604	-0.744776	0.186335
arhgap33	ENSDARG00000011333	569720	168.536	199.056	129.837	78.4866	51.1442	95.4548	-1.14354	0.0370162
arhgap35a	ENSDARG00000062577	100004299	963.729	864.526	935.214	1028.08	1764.48	1463.64	0.623008	0.181404
arhgap35b	ENSDARG00000060297	564565	405.977	236.135	324.104	202.515	337.552	251.563	-0.287934	0.686404
arhgap36	ENSDARG00000059672	559813	100.563	139.534	80.0497	338.171	326.3	301.279	1.59304	0.000287576
arhgap39	ENSDARG00000100007	101884459	34.4521	8.78187	14.6432	7.75176	4.09154	8.94888	-1.47697	0.280514
arhgap42a	ENSDARG00000056619	566275	366.869	297.608	313.365	1338.15	1711.29	1309.52	2.15616	1.90605e-09
arhgap42b	ENSDARG00000010654	569534	14.8982	13.6607	9.76215	24.2242	23.5263	14.9148	0.708862	0.587751
arhgap44	ENSDARG00000104549	100333556	12.1048	15.6122	14.6432	10.6587	0	2.98296	-1.62792	0.366701
arhgap4a	ENSDARG00000039265	393416	21.4162	45.8609	64.4302	21.3173	6.13731	13.9205	-1.66703	0.0805275
arhgap4b	ENSDARG00000015003	561231	101.494	85.8672	50.7632	19.3794	40.9154	47.7274	-1.14173	0.126415
arhgap5	ENSDARG00000061294	795752	730.944	937.709	958.644	1381.75	1598.77	1492.47	0.767704	0.0543488
ARHGAP6	ENSDARG00000111170		19.5539	48.7882	14.6432	111.432	59.3273	73.5797	1.55927	0.0406155
arhgdia	ENSDARG00000043795	406770	1217.93	2694.08	3365.01	2441.8	2788.38	3519.89	0.265983	0.732106
arhgdig	ENSDARG00000004034	394132	892.031	1092.86	2105.7	1028.08	437.795	742.757	-0.889004	0.1336
arhgef10	ENSDARG00000077788	334278	40.039	44.8851	45.8821	96.897	48.0756	77.557	0.767481	0.301632
arhgef10la	ENSDARG00000088630	799435	430.186	264.432	394.391	209.298	380.513	375.853	-0.173724	0.82889
arhgef10lb	ENSDARG00000074244	567649	52.1438	52.6912	64.4302	23.2553	19.4348	11.9318	-1.63105	0.0241008
arhgef11	ENSDARG00000052482		669.489	595.216	714.59	398.247	398.925	433.524	-0.685518	0.100986
arhgef12a	ENSDARG00000030532	562455	347.315	493.736	394.391	708.317	740.568	724.86	0.815256	0.0495082
arhgef12b	ENSDARG00000100913	571031	498.159	659.616	583.777	812.966	1111.88	1142.47	0.816624	0.0534629
arhgef15	ENSDARG00000100293	101882903	120.117	55.6185	29.2865	46.5106	23.5263	36.7899	-0.940567	0.308389
arhgef16	ENSDARG00000077114	567180	56.7995	131.728	140.575	30.0381	15.3433	41.7615	-1.9156	0.00502149
ARHGEF17	ENSDARG00000101644	100002227	393.872	453.73	456.869	1699.57	1460.68	920.741	1.64553	4.36303e-05
arhgef18a	ENSDARG00000011157	407987	139.671	184.419	200.124	71.7038	76.7163	87.5002	-1.15171	0.0193624
arhgef18b	ENSDARG00000042308	562264	41.9013	32.2002	14.6432	10.6587	2.04577	14.9148	-1.68211	0.154045
arhgef19	ENSDARG00000078853	569202	14.8982	24.3941	4.88108	3.87588	2.04577	2.98296	-2.3079	0.133771
arhgef1a	ENSDARG00000040380	368266	189.021	238.086	275.293	404.06	749.774	367.899	1.11535	0.024945
arhgef1b	ENSDARG00000055837	557983	1614.59	1450.96	1247.6	4075.49	6789.91	4262.65	1.81037	2.73156e-06
arhgef2	ENSDARG00000075819	561276	122.91	124.898	54.6681	70.7348	26.595	82.5286	-0.749424	0.380931
arhgef25b	ENSDARG00000014465	569561	121.048	48.7882	11.7146	5.81382	23.5263	8.94888	-2.24906	0.0346635
arhgef28	ENSDARG00000060415	559941	151.776	146.365	68.3351	134.687	216.852	151.137	0.455321	0.548107
arhgef33	ENSDARG00000097964	559216	25.1408	28.2971	17.5719	14.5345	5.11442	33.8069	-0.40887	0.80001
arhgef37	ENSDARG00000002463	101883655	41.9013	50.7397	25.3816	53.2933	25.5721	28.8353	-0.131086	0.922182
arhgef38	ENSDARG00000079377	100317614	52.1438	38.0548	95.6691	5.81382	15.3433	24.858	-2.01537	0.0168803
arhgef39	ENSDARG00000013476	492469	75.4223	78.0611	59.5491	53.2933	141.158	67.6138	0.297885	0.765446
arhgef3l	ENSDARG00000037554	553761	17.6916	28.2971	94.6929	25.1932	11.2517	20.8807	-1.29312	0.223956
arhgef4	ENSDARG00000012914	559017	1036.36	1116.27	1548.28	1923.41	1771.64	1421.88	0.467442	0.352193
arhgef40	ENSDARG00000078979	100151026	74.4911	76.1096	23.4292	142.439	98.1969	119.318	1.04813	0.140724
arhgef6	ENSDARG00000006683	558288	437.635	629.367	722.399	848.818	1605.93	1087.79	0.98533	0.0376134
arhgef7a	ENSDARG00000006299	553493	418.081	298.584	280.174	247.087	437.795	291.336	-0.0305599	0.973242
arhgef7b	ENSDARG00000073848	494081	654.591	583.507	643.326	800.369	1634.57	1141.48	0.926589	0.0432032
arhgef9a	ENSDARG00000061746	559868	92.1828	47.8124	91.7643	38.7588	18.4119	53.6933	-1.0632	0.177604
arhgef9b	ENSDARG00000078624	560923	119.186	82.9399	266.507	39.7278	19.4348	22.8694	-2.51251	0.000128822
arid1aa	ENSDARG00000101710	100141358	1614.59	1723.2	1671.28	1432.14	1856.54	1754.98	0.00990038	0.989464
arid1ab	ENSDARG00000101891	568161	1831.55	2040.32	2312.65	1671.47	2427.3	2096.03	0.00238025	0.997177
arid1b	ENSDARG00000092503	569589	1164.85	1083.1	1582.45	1348.81	1531.26	1178.27	0.0833959	0.9066
arid2	ENSDARG00000007413	566352	897.618	971.86	932.286	728.665	726.248	745.74	-0.348387	0.473177
arid3a	ENSDARG00000070843	562799	40.039	91.7218	33.1913	51.3554	32.7323	80.5399	-0.00204367	0.998429
arid3b	ENSDARG00000104034	571249	851.992	1018.7	937.167	1406.94	1904.61	1328.41	0.724636	0.0856654
arid3c	ENSDARG00000067729	569444	54.9372	39.0305	18.5481	52.3244	69.5561	43.7501	0.556349	0.573917
arid4a	ENSDARG00000043873	327404	1385.53	1699.78	1485.8	1879.8	1828.92	1722.16	0.248665	0.64402
arid5a	ENSDARG00000077120	100462698	27.003	10.7334	6.83351	11.6276	2.04577	16.9034	-0.543638	0.784338
arid5b	ENSDARG00000037196	100536827	337.072	402.99	380.724	419.564	749.774	565.768	0.630429	0.208725
arid6	ENSDARG00000069988	572528	29.7964	18.5395	26.3578	17.4415	5.11442	25.8523	-0.624652	0.657471
arih1	ENSDARG00000003616	327005	323.105	210.765	314.341	206.391	387.673	188.921	-0.115831	0.896846
arih1l	ENSDARG00000036870	405859	402.252	548.379	493.965	673.434	888.887	594.604	0.578331	0.233649
arih2	ENSDARG00000012848	406417	514.92	558.137	495.917	606.575	786.598	649.291	0.380425	0.454211
arl1	ENSDARG00000101680	436746	517.713	729.871	617.944	618.203	745.683	792.473	0.209049	0.741278
arl11	ENSDARG00000036637	324689	45.6258	48.7882	80.0497	45.5416	22.5035	33.8069	-0.774882	0.36329
arl13a	ENSDARG00000052575	793658	222.542	176.613	54.6681	115.307	25.5721	33.8069	-1.37643	0.11074
arl13b	ENSDARG00000012763	286784	375.249	217.595	216.72	205.422	323.231	198.864	-0.154676	0.855132
arl14	ENSDARG00000063223	556921	16.7605	4.87882	5.85729	6.78279	0	4.9716	-1.22329	0.599002
arl14ep	ENSDARG00000001210	751672	264.443	395.184	574.015	353.674	258.79	317.188	-0.40786	0.532661
arl15a	ENSDARG00000076040	567657	38.1767	32.2002	33.1913	0	8.18308	7.95456	-2.68809	0.0152623
arl15b	ENSDARG00000057995	560030	21.4162	14.6365	12.6908	4.84485	15.3433	14.9148	-0.476379	0.778079
arl16	ENSDARG00000059498	100037345	182.503	102.455	157.171	113.369	159.57	147.159	-0.0742959	0.935994
arl2	ENSDARG00000069496	449774	154.569	233.207	475.417	432.161	287.431	326.137	0.277113	0.752284
arl2bp	ENSDARG00000025383	393976	84.7336	84.8914	87.8594	34.8829	58.3044	61.6479	-0.734444	0.288424
arl3	ENSDARG00000071409	797451	411.563	264.432	367.057	428.285	742.614	509.092	0.687385	0.185491
arl3l1	ENSDARG00000111106	393666	433.911	223.45	122.027	78.4866	65.4646	87.5002	-1.7518	0.00286936
arl3l2	ENSDARG00000015404	393692	189.021	106.358	57.5967	20.3484	22.5035	39.7728	-2.09557	0.00208615
arl4aa	ENSDARG00000099918	393834	203.919	369.814	324.104	72.6727	108.426	100.426	-1.67343	0.000388974
arl4ab	ENSDARG00000033182	338267	121.048	212.716	219.648	572.661	445.978	495.172	1.45224	0.000930808
arl4ca	ENSDARG00000057606	550444	65.1797	71.2307	50.7632	126.935	195.371	137.216	1.29531	0.0129878
arl4cb	ENSDARG00000032708	406531	250.476	281.996	383.653	170.539	401.994	187.927	-0.268942	0.748217
arl4d	ENSDARG00000045074	323573	403.183	527.888	373.891	567.816	496.099	502.132	0.263212	0.66298
arl5a	ENSDARG00000018627	436611	187.159	312.244	410.011	414.719	500.191	281.393	0.395744	0.573848
arl5c	ENSDARG00000035719	393819	507.471	1006.01	282.126	2023.21	1746.06	1361.22	1.51467	0.00491671
arl6	ENSDARG00000032056	494134	239.303	88.7945	85.907	208.329	166.73	127.273	0.278415	0.773782
arl6ip1	ENSDARG00000054578	394087	2246.84	2889.24	3600.28	1986.39	2108.16	2162.65	-0.481495	0.313266
arl6ip4	ENSDARG00000105036	553796	239.303	293.705	434.416	236.429	218.897	276.421	-0.402579	0.519677
arl6ip5a	ENSDARG00000077044	450076	64.2486	55.6185	43.9297	49.4175	83.8765	41.7615	0.0947834	0.934941
arl6ip5b	ENSDARG00000016238	436790	390.147	398.112	540.823	1001.91	1021.86	795.456	1.08494	0.00645532
arl6ip6	ENSDARG00000071013	100037347	45.6258	78.0611	52.7156	62.983	80.8079	47.7274	0.118738	0.914595
arl8	ENSDARG00000094709	327551	569.857	426.409	316.294	392.433	1055.62	829.263	0.794712	0.181992
arl8a	ENSDARG00000078686	567222	1419.99	1065.53	1606.85	1295.51	1621.27	1330.4	0.0535326	0.942115
arl8ba	ENSDARG00000006915	337424	270.961	330.784	543.752	389.526	483.824	392.757	0.144522	0.855895
arl8bb	ENSDARG00000070318	562445	51.2126	64.4004	46.8583	34.8829	49.0985	48.7217	-0.292379	0.770065
arl9	ENSDARG00000071881	751670	62.3863	22.4426	10.7384	17.4415	73.6477	46.7331	0.525622	0.707119
armc1	ENSDARG00000013861	494066	45.6258	22.4426	33.1913	8.72073	34.7781	20.8807	-0.656161	0.591343
armc10	ENSDARG00000062960	557740	149.913	247.844	146.432	102.711	135.021	168.04	-0.423448	0.548363
armc1l	ENSDARG00000020887	321240	206.713	294.681	347.533	106.587	220.943	230.682	-0.604992	0.347828
armc2	ENSDARG00000022660	555846	128.497	38.0548	100.55	154.066	34.7781	67.6138	-0.0582708	0.96817
armc3	ENSDARG00000074708	560136	30.7276	17.5637	3.90486	1.93794	0	0.99432	-4.1406	0.0140608
armc4	ENSDARG00000055128	799229	54.0061	29.2729	33.1913	16.4725	8.18308	11.9318	-1.66922	0.0600519
armc5	ENSDARG00000078083	569910	175.985	122.946	100.55	80.4245	125.815	127.273	-0.261159	0.756521
ARMC6	ENSDARG00000103770	555425	23.2785	18.5395	7.80972	7.75176	16.3662	30.8239	0.145007	0.939157
armc7	ENSDARG00000061197	767659	58.6618	75.1338	113.241	120.152	83.8765	75.5683	0.179483	0.854302
armc8	ENSDARG00000062258	571528	144.327	149.292	156.194	202.515	170.822	220.739	0.401503	0.500162
armc9	ENSDARG00000087299	100334308	145.258	168.807	146.432	198.639	159.57	156.108	0.159725	0.833387
armh1	ENSDARG00000029859	100000984	36.3144	22.4426	37.0962	6.78279	0	3.97728	-3.14588	0.00553369
armh3	ENSDARG00000104285	393591	322.174	358.105	349.485	437.005	476.664	432.529	0.386595	0.448251
armt1	ENSDARG00000055676	541518	51.2126	54.6428	27.334	93.9901	33.7552	51.7047	0.430729	0.686274
arnt	ENSDARG00000021855	493634	95.9073	92.6975	61.5016	189.918	170.822	158.097	1.05247	0.0394135
arnt2	ENSDARG00000103697	64277	1015.87	1063.58	1838.21	1278.07	1263.26	1023.16	-0.136256	0.855054
arntl1a	ENSDARG00000006791	58098	322.174	153.195	287.007	443.788	627.028	182.955	0.717466	0.318064
arntl1b	ENSDARG00000035732	352935	250.476	129.777	113.241	367.24	367.216	106.392	0.768429	0.319118
arntl2	ENSDARG00000041381	58099	157.362	88.7945	61.5016	148.252	166.73	50.7103	0.248651	0.822721
arpc1a	ENSDARG00000008383	394243	821.265	912.339	1453.58	1421.48	2132.71	1557.11	0.681422	0.172762
arpc1b	ENSDARG00000027063	335474	473.95	560.088	753.638	966.063	1958.82	1278.7	1.23354	0.00701323
arpc2	ENSDARG00000075989	327068	919.965	1598.3	2020.77	2001.89	2417.08	2298.87	0.565662	0.295016
arpc3	ENSDARG00000057882	415204	663.902	1208	2138.89	1392.41	1695.94	1448.72	0.177932	0.838221
arpc4	ENSDARG00000054063	114456	512.126	672.301	1174.39	634.675	1168.13	749.718	0.113865	0.898231
arpc4l	ENSDARG00000058225	445305	609.896	731.823	1090.43	1073.62	1395.21	1211.08	0.597486	0.231105
arpc5a	ENSDARG00000039142	336504	522.369	873.308	1532.66	975.753	1539.44	1005.26	0.26572	0.748144
arpc5b	ENSDARG00000019062	399482	448.809	752.314	1396.96	711.224	1155.86	901.849	0.0919216	0.924571
arpc5la	ENSDARG00000041720	393550	151.776	184.419	258.697	226.739	212.76	221.733	0.152833	0.844209
arpc5lb	ENSDARG00000035433	556104	201.126	286.874	436.368	258.715	377.444	266.478	-0.034257	0.971459
arpin	ENSDARG00000041085	550477	42.8324	84.8914	114.217	221.894	172.867	145.171	1.15909	0.0523994
arpp19a	ENSDARG00000032532	393603	899.48	1048.95	1642.97	1424.39	1796.19	1596.88	0.423757	0.447204
arpp19b	ENSDARG00000039880	393947	343.59	564.967	643.326	490.299	459.275	530.967	-0.0677178	0.933025
arpp21	ENSDARG00000061081	564134	108.012	140.51	144.48	95.928	148.318	61.6479	-0.361774	0.662391
arr3a	ENSDARG00000056511	436678	2803.66	1703.68	738.995	345.922	438.817	453.41	-2.08323	6.88291e-05
arr3b	ENSDARG00000098475	796867	2231.01	841.108	1045.53	581.382	240.378	543.893	-1.59215	0.00418822
arrb1	ENSDARG00000043241	553266	34.4521	13.6607	19.5243	42.6347	45.0069	37.7842	0.889016	0.342626
arrb2a	ENSDARG00000039215	321378	337.072	201.007	415.868	241.274	351.872	238.637	-0.19791	0.805901
arrb2b	ENSDARG00000011545	394099	934.864	1181.65	1518.02	1079.43	1759.36	1428.84	0.231665	0.730722
arrdc1a	ENSDARG00000068148	100006005	104.288	169.783	184.505	63.952	41.9383	46.7331	-1.5861	0.00315069
arrdc1b	ENSDARG00000079839	570029	7.44911	7.80611	1.95243	4.84485	1.02288	3.97728	-0.803215	1
arrdc2	ENSDARG00000020761	335206	581.962	861.599	1395.99	3059.04	3035.92	2744.32	1.63836	0.000175279
arrdc3a	ENSDARG00000052690	566685	1425.57	924.048	1306.18	4365.21	4318.62	2467.9	1.60898	0.000107991
arrdc3b	ENSDARG00000036028	447866	1246.8	1183.6	1907.53	4080.33	2233.98	1936.94	0.927659	0.0674007
arsa	ENSDARG00000042270	541416	24.2096	7.80611	12.6908	13.5656	4.09154	2.98296	-1.113	0.507154
ARSB	ENSDARG00000108788	100538007	10.2425	3.90305	0	2.90691	1.02288	2.98296	-1.03363	1
arsg	ENSDARG00000101715	564790	83.8025	66.3519	38.0724	108.525	135.021	150.142	1.06367	0.0779548
arsh	ENSDARG00000002299	100332997	21.4162	15.6122	4.88108	11.6276	13.2975	11.9318	-0.187163	0.924571
arsia	ENSDARG00000077606	100329483	49.3504	78.0611	44.9059	580.413	271.064	374.859	2.83179	1.23269e-08
arsib	ENSDARG00000117075	563783	21.4162	6.83034	3.90486	5.81382	0	10.9375	-0.940293	0.693198
arsj	ENSDARG00000077590	559800	64.2486	110.261	151.313	461.23	484.847	325.143	1.9647	4.48212e-05
arsk	ENSDARG00000059714	562412	36.3144	32.2002	35.1438	27.1312	52.1671	38.7785	0.186787	0.876792
art4	ENSDARG00000078178	555597	12.1048	7.80611	2.92865	6.78279	11.2517	1.98864	-0.193086	0.942253
artna	ENSDARG00000096252		1.86228	0.975763	0.976215	0	0	0	-2.79698	1
artnb	ENSDARG00000093714	101883396	13.0359	27.3214	18.5481	93.0211	47.0527	8.94888	1.3405	0.227764
arv1	ENSDARG00000074757	568203	138.74	128.801	130.813	137.594	129.906	104.404	-0.0991367	0.906299
arvcfa	ENSDARG00000074329	572216	40.9701	11.7092	12.6908	14.5345	1.02288	6.96024	-1.53469	0.304296
arvcfb	ENSDARG00000061688	564669	889.238	1026.5	1201.72	2038.71	1774.7	1578.98	0.790614	0.0500001
arxa	ENSDARG00000058011	30657	28.8653	4.87882	16.5957	4.84485	2.04577	18.8921	-0.965806	0.59887
arxb	ENSDARG00000101523	100329907	22.3473	14.6365	35.1438	0	8.18308	2.98296	-2.70038	0.0464088
as3mt	ENSDARG00000027572	664699	73.56	150.268	151.313	71.7038	261.858	169.034	0.421875	0.653365
asah1a	ENSDARG00000037091	450068	100.563	108.31	141.551	281.97	273.11	227.699	1.15979	0.0101404
asah1b	ENSDARG00000034817	393549	170.398	349.323	361.2	289.722	463.367	380.825	0.364357	0.610222
asah2	ENSDARG00000012829	493602	14.8982	3.90305	11.7146	23.2553	19.4348	23.8637	1.12316	0.369474
asap1a	ENSDARG00000029463	100170829	1122.95	1065.53	1422.35	1230.59	2073.39	1503.41	0.412885	0.448251
asap1b	ENSDARG00000039729	565859	932.07	648.883	660.898	497.082	714.996	561.791	-0.33798	0.562573
asap2a	ENSDARG00000010181	570669	58.6618	38.0548	37.0962	45.5416	18.4119	30.8239	-0.496824	0.64223
asap2b	ENSDARG00000019564	560581	81.0091	76.1096	95.6691	59.1072	98.1969	90.4831	-0.0292863	0.978788
asap3	ENSDARG00000021896	664764	860.372	1452.91	652.112	2648.2	3667.04	2337.65	1.54497	0.000648729
asb1	ENSDARG00000026635	554673	11.1737	10.7334	3.90486	8.72073	2.04577	9.9432	-0.316511	0.896069
asb10	ENSDARG00000099461	559467	17.6916	4.87882	6.83351	2.90691	11.2517	3.97728	-0.702561	0.74927
asb11	ENSDARG00000056561	791758	14.8982	6.83034	11.7146	2.90691	13.2975	20.8807	0.146849	0.947489
asb12a	ENSDARG00000017086	322927	203.919	325.905	519.347	342.046	417.337	379.83	0.118957	0.891392
asb12b	ENSDARG00000037558	445507	23.2785	17.5637	17.5719	1.93794	8.18308	9.9432	-1.54497	0.238259
asb13a.1	ENSDARG00000079698	436801	82.8714	72.2065	95.6691	36.8209	149.341	56.6763	-0.0472768	0.971509
asb13a.2	ENSDARG00000045765	563551	9.31139	17.5637	8.78594	4.84485	29.6636	3.97728	0.107689	0.963934
asb13b	ENSDARG00000089833	556808	17.6916	4.87882	6.83351	4.84485	6.13731	8.94888	-0.563744	0.791701
asb14a	ENSDARG00000008473	568371	12.1048	15.6122	12.6908	14.5345	1.02288	7.95456	-0.777242	0.682507
asb14b	ENSDARG00000087741	100535284	11.1737	0.975763	7.80972	43.6036	5.11442	7.95456	1.50486	0.383661
asb15a	ENSDARG00000045633	100151067	35.3833	24.3941	51.7394	32.945	16.3662	11.9318	-0.863009	0.417648
asb15b	ENSDARG00000045863	568579	10.2425	7.80611	4.88108	23.2553	1.02288	11.9318	0.660434	0.763063
asb16	ENSDARG00000056468	678621	17.6916	7.80611	3.90486	17.4415	4.09154	10.9375	0.142792	0.951675
asb18	ENSDARG00000114572	792746	45.6258	17.5637	12.6908	10.6587	22.5035	28.8353	-0.29408	0.854486
asb2a.1	ENSDARG00000003797	567986	39.1078	29.2729	17.5719	30.0381	9.20596	12.9262	-0.718812	0.571864
asb2b	ENSDARG00000102490	402848	69.8354	52.6912	88.8356	23.2553	16.3662	14.9148	-1.95329	0.00339037
asb3	ENSDARG00000005246	334210	115.461	126.849	153.266	80.4245	152.41	92.4718	-0.282621	0.732662
asb4	ENSDARG00000034988	550321	51.2126	47.8124	57.5967	5.81382	13.2975	21.875	-1.93557	0.0166718
asb5a	ENSDARG00000097938	550441	19.5539	15.6122	18.5481	17.4415	8.18308	17.8978	-0.302436	0.851539
asb5b	ENSDARG00000053222	550449	197.401	172.71	291.888	165.694	127.861	126.279	-0.656688	0.247284
asb6	ENSDARG00000007125	553600	25.1408	21.4668	35.1438	17.4415	5.11442	13.9205	-1.16153	0.305694
asb7	ENSDARG00000006494	405798	535.405	507.397	780.972	499.989	492.007	430.541	-0.358403	0.527084
asb8	ENSDARG00000003383	327200	270.961	213.692	283.102	145.345	431.657	284.376	0.165621	0.856812
ascc1	ENSDARG00000077760	550273	48.4192	132.704	172.79	149.221	95.1283	122.301	0.0518919	0.965368
ascc2	ENSDARG00000013058	393414	82.8714	115.14	101.526	165.694	181.051	160.086	0.759043	0.151302
ascc3	ENSDARG00000086678	100332599	57.7306	71.2307	40.0248	24.2242	32.7323	66.6195	-0.451785	0.667825
ascl1a	ENSDARG00000038386	30466	706.734	890.872	681.398	28.1001	22.5035	72.5854	-4.20908	3.8747e-15
ascl1b	ENSDARG00000101628	30478	166.674	161.977	480.298	23.2553	9.20596	29.8296	-3.69702	3.34909e-08
asf1ba	ENSDARG00000101037	386897	309.138	566.919	468.583	168.601	614.754	422.586	-0.157197	0.875634
asf1bb	ENSDARG00000043713	792029	341.728	396.16	492.989	190.887	388.696	351.989	-0.402111	0.53914
ash1l	ENSDARG00000070981	563799	1440.47	1682.22	1484.82	1688.91	1660.14	1719.18	0.137513	0.8195
ash2l	ENSDARG00000060392	558193	291.446	337.614	328.985	188.949	438.817	374.859	0.0654088	0.942402
asic1a	ENSDARG00000008329	791696	65.1797	43.9094	28.3102	18.4104	12.2746	25.8523	-1.28105	0.144494
asic1b	ENSDARG00000101866	407672	46.5569	21.4668	23.4292	49.4175	59.3273	43.7501	0.735819	0.414043
asic1c	ENSDARG00000098428	407670	22.3473	11.7092	36.12	19.3794	16.3662	22.8694	-0.259291	0.865708
asic2	ENSDARG00000006849	407669	114.53	50.7397	154.242	17.4415	23.5263	13.9205	-2.54235	0.000156077
asic4a	ENSDARG00000025162	407668	137.809	76.1096	150.337	93.0211	95.1283	95.4548	-0.361275	0.645107
asic4b	ENSDARG00000004243	407667	30.7276	27.3214	22.453	23.2553	2.04577	8.94888	-1.22923	0.347645
asip1	ENSDARG00000077858	798574	42.8324	78.0611	47.8346	257.746	262.881	218.75	2.13233	6.17598e-06
asip2b	ENSDARG00000114760	796595	700.216	1406.08	1725.95	4064.83	4860.75	3294.18	1.67302	0.000230367
asl	ENSDARG00000033361	393423	70.7666	68.3034	102.503	132.749	106.38	119.318	0.569769	0.382003
asmt	ENSDARG00000098249	100141344	82.8714	91.7218	57.5967	27.1312	18.4119	30.8239	-1.60351	0.0129812
asmt2	ENSDARG00000070874	568256	49.3504	58.5458	42.9535	91.0832	105.357	94.4604	0.947317	0.112028
asmtl	ENSDARG00000021433	324134	253.27	213.692	209.886	242.242	254.698	163.069	-0.0365156	0.966745
asna1	ENSDARG00000018190	325704	544.716	470.318	609.158	461.23	910.367	794.462	0.415229	0.488729
asns	ENSDARG00000016375	394138	67.042	112.213	90.788	65.89	77.7392	94.4604	-0.181402	0.845195
asnsd1	ENSDARG00000000540	110631416	189.021	234.183	233.316	192.825	209.691	298.296	0.0942995	0.907117
aspa	ENSDARG00000005154	557232	19.5539	27.3214	35.1438	31.976	37.8467	16.9034	0.0809409	0.957683
aspdh	ENSDARG00000038297	447919	0	1.95153	10.7384	0	0	3.97728	-1.67193	1
aspg	ENSDARG00000052942	100124594	201.126	161.977	240.149	359.488	251.63	159.091	0.352662	0.634648
asph	ENSDARG00000055945	323659	703.01	604.973	431.487	557.158	1706.17	1523.3	1.12214	0.0448804
asphd1	ENSDARG00000075813	557921	103.356	44.8851	113.241	10.6587	1.02288	6.96024	-3.80269	4.54659e-06
asphd2	ENSDARG00000059629	569819	211.369	176.613	373.891	251.932	288.453	259.518	0.0703487	0.937593
aspm	ENSDARG00000103754	554173	1169.51	2358.42	1219.29	635.644	842.857	704.973	-1.12047	0.0157429
aspn	ENSDARG00000002192	65228	1588.52	3007.3	836.617	1813.91	5113.4	3752.56	0.975211	0.145047
aspscr1	ENSDARG00000105321	550237	120.117	135.631	127.884	133.718	148.318	160.086	0.204739	0.783472
asrgl1	ENSDARG00000021681	541402	46.5569	35.1275	42.9535	16.4725	62.396	47.7274	0.0209581	0.988978
ASS1	ENSDARG00000103044		0	4.87882	0	0	0	3.97728	-0.292496	1
ASTE1	ENSDARG00000062530	100003699	81.0091	44.8851	82.9783	25.1932	73.6477	32.8126	-0.667537	0.472467
aste1a	ENSDARG00000070132	100006826	41.9013	35.1275	11.7146	17.4415	41.9383	74.574	0.5927	0.639723
astn1	ENSDARG00000068323	791157	656.453	266.383	696.042	86.2383	112.517	90.4831	-2.48501	5.94113e-07
asxl1	ENSDARG00000036956	403066	784.019	566.919	765.353	562.972	707.836	708.95	-0.0963152	0.891091
asxl2	ENSDARG00000076501	100150267	82.8714	51.7155	30.2627	27.1312	25.5721	69.6024	-0.431326	0.712625
asz1	ENSDARG00000004823	572911	15.8294	4.87882	9.76215	13.5656	15.3433	6.96024	0.233101	0.910171
atad1a	ENSDARG00000023267	368672	71.6977	43.9094	44.9059	56.2003	39.8925	43.7501	-0.199116	0.854038
atad1b	ENSDARG00000056609	368412	21.4162	39.0305	21.4767	44.5726	36.8238	15.9091	0.249081	0.857687
atad2	ENSDARG00000076590		335.21	591.313	369.009	370.147	738.523	605.541	0.403967	0.546945
atad2b	ENSDARG00000060537	100331225	172.261	234.183	133.742	123.059	158.547	110.37	-0.462889	0.484428
atad3	ENSDARG00000086848	403004	15.8294	1.95153	2.92865	0	5.11442	2.98296	-1.36249	1
atad5a	ENSDARG00000070568	560591	523.3	805.981	493.965	187.011	519.625	413.637	-0.702858	0.261489
atad5b	ENSDARG00000101126	321619	135.946	170.759	121.051	121.121	151.387	164.063	0.0293239	0.975444
atat1	ENSDARG00000004472	406389	155.5	68.3034	148.385	32.945	34.7781	45.7387	-1.71417	0.00420396
atcaya	ENSDARG00000071678	565827	325.899	186.371	425.63	49.4175	19.4348	21.875	-3.36758	5.06117e-09
atcayb	ENSDARG00000059781	100329872	331.485	159.049	596.468	36.8209	51.1442	45.7387	-3.02373	1.62293e-07
ATE1	ENSDARG00000103813	101886126	86.5959	103.431	111.289	197.67	108.426	112.358	0.474486	0.50345
atf1	ENSDARG00000044301	325609	565.201	718.162	836.617	1195.71	1033.11	937.644	0.578931	0.210445
atf2	ENSDARG00000023903	100006516	14.8982	14.6365	15.6194	24.2242	1.02288	6.96024	-0.483908	0.81581
atf3	ENSDARG00000007823	393939	6174.38	8708.69	544.728	23921	24996.2	15059	2.052	0.147644
atf4a	ENSDARG00000111939	406514	3524.36	4958.83	1461.39	4625.86	8258.77	7763.65	1.05403	0.068622
atf4b	ENSDARG00000038141	556410	9578.63	12353.2	4661.43	22599.3	38708	23253.2	1.66892	0.000570416
atf5a	ENSDARG00000068096	566223	145.258	38.0548	10.7384	8.72073	25.5721	15.9091	-1.95319	0.0736405
atf5b	ENSDARG00000077785	567253	293.309	327.857	482.25	925.366	1417.72	976.423	1.58907	0.000142267
atf6	ENSDARG00000012656	558071	724.426	654.737	440.273	501.926	599.41	616.479	-0.0830475	0.913518
atf7a	ENSDARG00000011298	566279	33.521	55.6185	37.0962	109.494	58.3044	92.4718	1.04499	0.124725
atf7b	ENSDARG00000055481	567018	284.929	149.292	231.363	218.018	320.163	345.029	0.40775	0.541746
atf7ip	ENSDARG00000069619	558977	1291.49	1265.57	1052.36	1062.96	1605.93	1455.68	0.192411	0.762376
atf7ip2	ENSDARG00000089698	100005485	134.084	132.704	278.221	175.384	201.508	161.08	-0.0185845	0.986033
atg10	ENSDARG00000104846	641330	116.392	126.849	150.337	187.011	172.867	184.944	0.469391	0.419416
atg101	ENSDARG00000043287	567680	225.336	257.602	421.725	369.178	360.055	311.222	0.201959	0.78708
atg12	ENSDARG00000069545	570965	47.4881	89.7702	90.788	136.625	55.2358	45.7387	0.0604973	0.962838
atg13	ENSDARG00000036040	393405	550.303	467.391	738.019	407.936	984.015	761.649	0.294585	0.692696
ATG14	ENSDARG00000002670	407686	96.8385	92.6975	46.8583	61.0451	102.288	123.296	0.277276	0.776343
atg16l1	ENSDARG00000099430	550552	269.099	224.426	414.892	352.705	401.994	311.222	0.230704	0.751972
atg16l2	ENSDARG00000043238	100034627	8.38025	18.5395	15.6194	27.1312	9.20596	6.96024	0.0286544	0.989495
ATG2A	ENSDARG00000101507	101883461	77.2845	78.0611	70.2875	138.563	25.5721	72.5854	0.070186	0.95859
atg2b	ENSDARG00000097650	100000277	40.039	29.2729	13.667	19.3794	2.04577	35.7955	-0.535667	0.753256
atg3	ENSDARG00000009350	336632	198.333	237.111	338.747	343.015	328.346	352.984	0.404178	0.494948
atg4a	ENSDARG00000014531	554140	210.437	187.347	185.481	450.571	355.964	321.165	0.951154	0.0283643
atg4b	ENSDARG00000052104	448859	153.638	142.461	157.171	337.202	291.522	191.904	0.856406	0.0876975
atg4c	ENSDARG00000044373	415193	185.297	189.298	188.41	180.228	440.863	262.501	0.649913	0.287148
atg4da	ENSDARG00000043548	795933	218.818	162.953	194.267	142.439	145.25	101.421	-0.566175	0.327427
atg4db	ENSDARG00000088145	100329304	13.0359	1.95153	0.976215	16.4725	2.04577	0	0.213563	1
atg5	ENSDARG00000023396	494180	203.919	328.832	356.319	447.664	373.353	356.961	0.406255	0.499058
atg7	ENSDARG00000102893	100333016	61.4552	88.7945	77.121	90.1142	112.517	76.5627	0.296359	0.723227
atg9a	ENSDARG00000044551	100009663	240.234	202.959	345.58	400.185	265.95	301.279	0.294765	0.670581
atg9b	ENSDARG00000055292	791223	575.444	608.876	601.349	919.553	962.534	802.417	0.588197	0.164414
atic	ENSDARG00000016706	140622	154.569	385.427	279.198	89.1452	235.263	289.347	-0.416592	0.640819
atl1	ENSDARG00000060481	571909	204.851	124.898	252.84	36.8209	9.20596	21.875	-3.09781	7.41371e-07
atl2	ENSDARG00000057719	323665	281.204	474.221	413.915	502.895	792.735	561.791	0.667664	0.196372
atl3	ENSDARG00000004270	449995	622.932	1051.87	706.78	1489.31	1929.16	1683.38	1.09915	0.0078417
atm	ENSDARG00000002385	403064	173.192	260.529	212.815	187.98	258.79	351.989	0.305101	0.671089
atmin	ENSDARG00000068601	571606	27.003	8.78187	24.4054	29.0691	2.04577	18.8921	-0.265881	0.892475
atn1	ENSDARG00000092067	321707	522.369	466.415	560.348	440.881	345.735	423.58	-0.356119	0.506783
atoh1a	ENSDARG00000055294	30303	49.3504	54.6428	90.788	13.5656	2.04577	2.98296	-3.3804	0.000129274
atoh1b	ENSDARG00000099564	493915	42.8324	41.9578	31.2389	10.6587	4.09154	3.97728	-2.6268	0.00386781
atoh1c	ENSDARG00000039602	100498672	40.039	25.3699	50.7632	9.6897	18.4119	1.98864	-1.95144	0.0614928
atoh7	ENSDARG00000069552	58216	108.012	71.2307	47.8346	3.87588	25.5721	6.96024	-2.64637	0.001994
atoh8	ENSDARG00000037555	561606	362.213	486.906	483.227	1038.74	1816.64	1082.81	1.5636	0.000179224
atox1	ENSDARG00000087693	558347	135.015	223.45	357.295	344.953	464.39	335.086	0.677311	0.273503
atp10a	ENSDARG00000061039	567172	105.219	200.032	113.241	345.922	277.202	290.342	1.12658	0.0228817
atp10b	ENSDARG00000076230	563932	94.9762	72.2065	157.171	69.7658	33.7552	112.358	-0.586741	0.511233
atp10d	ENSDARG00000078887	571658	297.964	260.529	322.151	271.312	438.817	392.757	0.324458	0.60273
atp11a	ENSDARG00000008413	562925	1209.55	644.004	450.035	297.474	259.813	318.183	-1.39584	0.00505333
ATP11B	ENSDARG00000101094	100329583	609.896	610.828	522.275	924.397	1469.88	1107.67	1.0065	0.0131965
atp11c	ENSDARG00000036442	368385	87.5271	45.8609	70.2875	43.6036	63.4188	65.6251	-0.239425	0.812488
atp13a1	ENSDARG00000029931	334466	308.207	375.669	291.888	305.226	345.735	259.518	-0.0999407	0.892054
atp13a2	ENSDARG00000061890	568666	91.2516	132.704	94.6929	79.4555	101.266	111.364	-0.125578	0.889678
atp13a3	ENSDARG00000076622	572029	409.701	297.608	259.673	383.712	288.453	309.234	0.0212749	0.98084
atp1a1a.1	ENSDARG00000002791	64612	3497.36	4626.09	3867.77	9857.33	17289.8	11815.5	1.70012	1.13898e-05
atp1a1a.2	ENSDARG00000007739	64613	166.674	1274.35	1869.45	138.563	15.3433	80.5399	-3.8194	0.0151609
atp1a1a.3	ENSDARG00000039131	64614	51.2126	122.946	293.841	19.3794	32.7323	11.9318	-2.87033	0.000172722
atp1a1a.4	ENSDARG00000001870	64615	233.716	810.859	827.831	41.6657	23.5263	34.8012	-4.22565	1.42838e-12
atp1a1a.5	ENSDARG00000040252	245703	16.7605	22.4426	24.4054	28.1001	16.3662	7.95456	-0.277351	0.862987
atp1a1b	ENSDARG00000019856	64616	4826.09	3907.93	8525.29	1744.15	1423.86	1501.42	-1.88603	8.81745e-06
atp1a2a	ENSDARG00000010472	64609	27.003	38.0548	30.2627	12.5966	13.2975	5.96592	-1.58101	0.100025
atp1a3a	ENSDARG00000018259	64610	2967.54	991.376	1859.69	204.453	201.508	147.159	-3.39505	5.20239e-12
atp1a3b	ENSDARG00000104139	64611	1140.65	713.283	473.465	57.1692	80.8079	176.989	-2.88567	2.76648e-07
atp1b1a	ENSDARG00000013144	64267	2567.15	4263.11	3554.4	7051.19	8474.6	9058.26	1.24329	0.00128364
atp1b1b	ENSDARG00000076833	64273	458.12	1890.05	2182.82	160.849	16.3662	80.5399	-4.13538	0.00218522
atp1b2a	ENSDARG00000099203	64269	1869.73	1014.79	1395.01	374.991	226.057	302.273	-2.24397	1.06564e-07
atp1b2b	ENSDARG00000034424	114457	1371.57	692.792	198.172	93.0211	94.1054	263.495	-2.32803	0.00117663
atp1b3a	ENSDARG00000015790	30468	1257.97	691.816	689.208	478.671	1329.75	846.167	0.00831098	0.993315
atp1b3b	ENSDARG00000042837	64272	695.561	425.433	944.977	205.422	298.682	197.87	-1.55754	0.00089615
atp1b4	ENSDARG00000053262	100037383	2218.9	1181.65	2116.44	830.407	4608.09	2402.28	0.507064	0.55969
atp23	ENSDARG00000063686	100004177	98.7007	168.807	176.695	123.059	135.021	141.193	-0.153488	0.857852
atp2a1	ENSDARG00000020574	260440	962.798	1369	1964.15	811.028	2345.47	1109.66	-0.0100701	0.992917
atp2a1l	ENSDARG00000035458	494489	91.2516	131.728	276.269	135.656	299.705	121.307	0.157037	0.886558
atp2a2a	ENSDARG00000029439	393940	67.042	95.6248	121.051	71.7038	123.769	139.205	0.238411	0.796341
atp2a2b	ENSDARG00000005122	568265	790.537	977.715	1019.17	1093	1492.39	1273.72	0.469343	0.327419
atp2a3	ENSDARG00000060978	568671	337.072	456.657	750.71	679.248	392.788	481.251	0.00849201	0.993145
atp2b1a	ENSDARG00000012684	378746	1081.05	1000.16	1234.91	484.485	576.907	507.103	-1.08017	0.00351868
atp2b1b	ENSDARG00000007788	561190	1298.94	900.63	191.338	183.135	92.0596	237.643	-2.22087	0.00115614
atp2b2	ENSDARG00000044902	768304	2717.99	2981.93	5152.47	4318.7	4758.46	4239.78	0.295264	0.638273
atp2b3a	ENSDARG00000043474	436745	418.081	216.619	414.892	68.7969	13.2975	46.7331	-3.02447	1.23684e-06
atp2b3b	ENSDARG00000023445	558525	1084.78	694.744	2262.87	124.028	84.8994	65.6251	-3.87965	1.68579e-12
atp2c1	ENSDARG00000060197	559574	133.153	110.261	93.7167	154.066	170.822	151.137	0.497298	0.411489
atp5f1b	ENSDARG00000070083	554135	6440.69	8365.22	9807.06	5639.41	8295.59	7544.9	-0.196432	0.760626
atp5f1c	ENSDARG00000045514	336957	1734.71	3172.21	4392.97	2129.8	3196.51	3060.52	-0.149075	0.856812
atp5f1d	ENSDARG00000019404	335709	883.651	1841.27	2559.64	1605.58	1317.48	1287.64	-0.327649	0.655577
atp5f1e	ENSDARG00000095897	798291	613.621	1566.1	1896.79	1822.63	607.593	789.49	-0.340266	0.714446
atp5fa1	ENSDARG00000010149	553755	5770.27	8485.24	8411.07	6204.31	8105.34	7777.57	-0.0373508	0.960425
atp5if1a	ENSDARG00000067975	100037369	209.506	570.822	673.589	551.344	242.424	415.626	-0.265337	0.777166
atp5if1b	ENSDARG00000044092	558368	250.476	446.9	819.045	454.447	213.783	341.052	-0.587016	0.429642
atp5l	ENSDARG00000011841	326977	971.178	2340.86	3413.83	2696.64	1282.7	1604.83	-0.268301	0.768247
atp5mc1	ENSDARG00000056008	406301	1648.12	3985.99	6069.13	1802.28	1814.6	2302.85	-0.98328	0.0900109
atp5mc3a	ENSDARG00000017775	394151	1205.82	1918.35	2468.85	1340.09	1896.43	1925	-0.115814	0.882102
atp5mc3b	ENSDARG00000009447	81541	2988.96	6352.22	7076.59	6689.77	4189.73	5367.34	-0.0150696	0.987442
atp5md	ENSDARG00000096003	794625	286.791	647.907	926.428	500.957	228.103	315.2	-0.833376	0.207892
atp5mea	ENSDARG00000078113	559659	288.653	635.222	672.612	678.279	345.735	431.535	-0.133045	0.883048
atp5meb	ENSDARG00000068940	767750	581.031	1313.38	1998.31	1873.99	987.084	1283.67	0.0906117	0.928308
atp5mf	ENSDARG00000037867	402883	367.8	749.386	1110.93	678.279	403.016	489.206	-0.504388	0.473293
atp5pb	ENSDARG00000011553	449787	1954.46	3420.05	4331.47	4017.35	4043.46	3498.02	0.252079	0.712297
atp5pd	ENSDARG00000098355	393675	1338.98	2818.98	4038.6	1964.1	1954.73	2313.78	-0.395144	0.571336
atp5pf	ENSDARG00000014313	406599	811.953	1737.83	2408.32	1357.53	953.328	1144.46	-0.520881	0.426088
atp5po	ENSDARG00000001788	335191	1957.25	4501.2	5627.88	4427.22	3612.83	3830.12	-0.0260039	0.979155
atp6ap1a	ENSDARG00000041417	100004566	1298.01	584.482	918.619	91.0832	80.8079	69.6024	-3.53586	8.66439e-15
atp6ap1b	ENSDARG00000037153	195824	290.515	365.911	430.511	378.867	619.868	594.604	0.551794	0.306364
atp6ap1la	ENSDARG00000091509	100000415	106.15	36.1032	26.3578	28.1001	1.02288	7.95456	-2.1817	0.0597025
atp6ap1lb	ENSDARG00000090963	561786	752.36	233.207	187.433	84.3004	106.38	84.5172	-2.09213	0.00068066
atp6ap2	ENSDARG00000008735	406296	2290.6	1710.51	2208.2	1049.39	1170.18	1084.8	-0.910092	0.0160227
atp6v0a1a	ENSDARG00000020847	324307	888.307	570.822	351.438	263.56	562.586	515.058	-0.433183	0.562343
atp6v0a1b	ENSDARG00000015174	553691	511.195	260.529	834.664	35.8519	5.11442	25.8523	-4.5842	4.47254e-11
atp6v0a2a	ENSDARG00000035538	561469	364.075	161.977	288.96	58.1382	90.0138	39.7728	-2.11755	0.000101347
atp6v0a2b	ENSDARG00000035565	561117	192.746	263.456	235.268	202.515	245.492	231.677	-0.02475	0.977712
atp6v0b	ENSDARG00000031681	321724	1388.33	1006.01	1375.49	543.592	732.385	635.371	-0.980013	0.0143785
atp6v0ca	ENSDARG00000057853	192336	2670.51	3398.58	3874.6	2534.83	2079.52	2654.84	-0.451954	0.347421
atp6v0cb	ENSDARG00000036577	325402	4961.11	2766.29	4489.62	799.4	642.371	608.524	-2.57495	5.54848e-11
atp6v0d1	ENSDARG00000069090	322811	697.423	534.718	1133.39	394.371	700.676	530.967	-0.540916	0.37713
atp6v1aa	ENSDARG00000034534	394110	631.312	574.725	1255.41	411.812	398.925	462.359	-0.951096	0.059119
atp6v1ab	ENSDARG00000076318	337583	173.192	170.759	401.225	57.1692	102.288	113.353	-1.44993	0.0139707
atp6v1b2	ENSDARG00000043465	359840	431.117	268.335	797.568	115.307	305.842	140.199	-1.41551	0.0223431
atp6v1ba	ENSDARG00000013443	359839	1006.56	691.816	891.285	416.657	810.125	807.388	-0.348478	0.593038
atp6v1c1a	ENSDARG00000023967	368907	423.668	283.947	478.346	203.484	407.108	255.54	-0.453719	0.488433
atp6v1c1b	ENSDARG00000035880	449655	135.946	192.225	346.556	80.4245	52.1671	100.426	-1.53321	0.00786703
atp6v1c2	ENSDARG00000070440	100538220	6.51797	6.83034	0	13.5656	0	1.98864	0.222713	1
atp6v1d	ENSDARG00000011175	393935	361.282	364.936	575.967	309.101	222.989	251.563	-0.732381	0.144776
atp6v1e1a	ENSDARG00000014085	108179059	290.515	301.511	320.199	322.667	595.319	456.393	0.591166	0.260249
atp6v1e1b	ENSDARG00000030694	192335	791.468	949.418	2103.74	502.895	417.337	481.251	-1.45579	0.0033067
atp6v1f	ENSDARG00000045543	436799	332.417	381.524	845.403	328.481	438.817	318.183	-0.52257	0.440786
atp6v1g1	ENSDARG00000022315	335025	1098.74	823.544	1564.87	366.271	835.697	689.064	-0.883003	0.104123
atp6v1h	ENSDARG00000006370	286779	841.75	644.98	1233.94	403.092	560.541	458.382	-0.936103	0.044666
atp7a	ENSDARG00000003699	564924	288.653	234.183	238.197	493.206	513.488	428.552	0.915096	0.0267964
atp7b	ENSDARG00000058145	556499	27.003	22.4426	19.5243	20.3484	4.09154	11.9318	-0.920498	0.486954
atp8a1	ENSDARG00000063001	767630	222.542	183.444	193.291	12.5966	16.3662	59.6592	-2.75768	2.89578e-05
ATP8A1	ENSDARG00000114495		121.048	58.5458	21.4767	17.4415	34.7781	34.8012	-1.20998	0.199681
atp8a2	ENSDARG00000077492	100330943	531.68	392.257	456.869	186.042	180.028	163.069	-1.38386	0.00046242
atp8b1	ENSDARG00000060980	100148342	25.1408	38.0548	55.6443	18.4104	0	10.9375	-2.01304	0.0951118
atp8b2	ENSDARG00000099216		11.1737	18.5395	64.4302	23.2553	0	0	-2.01584	0.639452
atp8b3	ENSDARG00000042285	566530	158.294	108.31	146.432	64.921	51.1442	53.6933	-1.28255	0.0140608
atp8b4	ENSDARG00000079453	559291	19.5539	8.78187	2.92865	8.72073	4.09154	13.9205	-0.227267	0.923663
atp8b5a	ENSDARG00000062040	100330945	47.4881	80.9884	27.334	84.3004	115.586	141.193	1.13033	0.100613
ATP9A	ENSDARG00000115869	101886226	114.53	48.7882	82.0021	62.983	51.1442	65.6251	-0.449031	0.604155
atp9b	ENSDARG00000062521	568160	45.6258	27.3214	18.5481	46.5106	23.5263	27.841	0.0970231	0.947339
atpaf1	ENSDARG00000042799	550606	256.994	303.462	453.94	235.46	435.749	385.796	0.0593117	0.948214
atpaf2	ENSDARG00000056270	560253	178.779	210.765	224.53	118.214	202.531	188.921	-0.269086	0.712542
atpv0e2	ENSDARG00000059057	553767	1001.91	608.876	839.545	152.128	165.707	159.091	-2.36129	1.70168e-09
atr	ENSDARG00000079625	567770	126.635	120.019	151.313	108.525	202.531	207.813	0.382446	0.596789
atraid	ENSDARG00000043388	553468	157.362	94.6491	217.696	222.863	191.279	190.91	0.365378	0.621867
atrip	ENSDARG00000063076	558534	102.425	145.389	93.7167	114.338	62.396	61.6479	-0.517909	0.493984
atrn	ENSDARG00000062164	794975	140.602	88.7945	83.9545	129.842	142.181	149.148	0.425956	0.539076
atrnl1a	ENSDARG00000077188	792417	151.776	122.946	117.146	273.25	299.705	161.08	0.90518	0.0866666
atrnl1b	ENSDARG00000006420	569196	963.729	856.72	1052.36	922.459	1287.81	942.616	0.134149	0.840413
atrx	ENSDARG00000042236	323299	4084.91	5196.92	4946.48	3869.1	5516.42	5306.69	0.0462835	0.948861
atrxl	ENSDARG00000099449		151.776	165.88	115.193	193.794	165.707	167.046	0.282737	0.685173
atxn10	ENSDARG00000008439	100034473	48.4192	65.3762	58.5729	46.5106	62.396	46.7331	-0.147395	0.886985
atxn1a	ENSDARG00000061687	557340	110.806	126.849	84.9307	114.338	26.595	61.6479	-0.67002	0.441673
atxn1b	ENSDARG00000060862	565841	563.339	374.693	649.183	202.515	355.964	355.967	-0.795754	0.131436
atxn1l	ENSDARG00000086977	793927	29.7964	59.5216	19.5243	48.4485	12.2746	27.841	-0.295584	0.838999
atxn2	ENSDARG00000052897	569210	185.297	257.602	187.433	175.384	334.483	246.591	0.262957	0.727013
atxn2l	ENSDARG00000011597	324525	585.686	763.047	723.376	862.383	700.676	626.422	0.0796055	0.91198
atxn3	ENSDARG00000099274	394079	30.7276	3.90305	3.90486	4.84485	18.4119	4.9716	-0.454146	0.844209
atxn7	ENSDARG00000074804	100001490	454.396	483.003	447.107	476.733	605.548	630.399	0.306825	0.579413
atxn7l1	ENSDARG00000089860	100536590	37.2456	27.3214	24.4054	38.7588	6.13731	24.858	-0.349532	0.817035
atxn7l2a	ENSDARG00000055300	692316	212.3	284.923	126.908	192.825	238.332	220.739	0.0626644	0.946564
atxn7l2b	ENSDARG00000056268	436928	269.099	243.941	248.935	289.722	440.863	273.438	0.397721	0.503177
atxn7l3	ENSDARG00000029331	368510	84.7336	71.2307	66.3827	31.007	95.1283	53.6933	-0.307607	0.768146
auh	ENSDARG00000042975	445182	213.231	237.111	298.722	97.866	305.842	280.398	-0.131129	0.894696
aup1	ENSDARG00000092609	324654	483.261	554.234	457.845	667.62	871.498	748.723	0.613467	0.164158
aurka	ENSDARG00000012485	445246	282.135	406.893	273.34	219.956	259.813	258.523	-0.382401	0.518522
aurkaip1	ENSDARG00000074985	100126015	194.608	344.445	527.156	216.08	230.149	243.608	-0.627957	0.316453
aurkb	ENSDARG00000037640	791894	385.492	423.481	399.272	242.242	543.152	492.189	0.0803224	0.926517
auts2a	ENSDARG00000056427	368890	1669.53	2103.75	2170.13	1841.04	1685.71	1816.62	-0.1535	0.801595
auts2b	ENSDARG00000020946	100150849	622.932	489.833	592.563	201.546	444.955	251.563	-0.925529	0.0698914
aven	ENSDARG00000002894	692323	204.851	216.619	329.961	213.173	302.774	313.211	0.142018	0.859437
avil	ENSDARG00000059342	678618	54.0061	29.2729	24.4054	23.2553	12.2746	15.9091	-1.06543	0.284396
avl9	ENSDARG00000055538	751682	371.524	241.014	245.03	242.242	499.168	304.262	0.285661	0.706756
avp	ENSDARG00000058567	352922	3.72456	3.90305	77.121	0.96897	0	0	-6.30736	0.00137375
avpr1aa	ENSDARG00000077083	571591	15.8294	8.78187	4.88108	21.3173	6.13731	19.8864	0.681939	0.690722
avpr1ab	ENSDARG00000045788	555939	94.045	128.801	69.3113	635.644	764.095	1069.89	3.07952	3.60045e-12
avpr2aa	ENSDARG00000007436	100007585	9.31139	4.87882	1.95243	19.3794	15.3433	11.9318	1.52743	0.298671
avpr2ab	ENSDARG00000029219	100151502	18.6228	17.5637	3.90486	6.78279	2.04577	4.9716	-1.53622	0.361944
avpr2l	ENSDARG00000076690	100004053	5.58683	6.83034	1.95243	4.84485	9.20596	0.99432	0.0638615	1
axdnd1	ENSDARG00000062355	557839	23.2785	36.1032	41.9773	15.5035	2.04577	7.95456	-1.98536	0.0614928
axin1	ENSDARG00000102964	57931	1062.43	1288.98	1496.54	1341.05	2204.32	1694.32	0.445382	0.398568
axin2	ENSDARG00000100149	58080	1041.01	1285.08	1664.45	2107.51	3251.75	2498.73	0.977593	0.0214545
AXL	ENSDARG00000112045	100330721	16.7605	17.5637	10.7384	35.8519	22.5035	30.8239	0.984916	0.340531
azi2	ENSDARG00000102419	406377	13.9671	11.7092	3.90486	14.5345	6.13731	6.96024	-0.0978669	0.967272
azin1a	ENSDARG00000052789	550230	70.7666	155.146	95.6691	69.7658	65.4646	87.5002	-0.529351	0.48893
azin1b	ENSDARG00000035869	317764	1767.3	1963.24	2455.18	3400.12	4832.11	3913.64	0.973458	0.0130658
b2m	ENSDARG00000053136	30400	85.6648	147.34	81.0259	146.314	433.703	293.324	1.47558	0.0113735
b2ml	ENSDARG00000015887	791742	1573.62	3388.83	2914	7713	6565.9	5942.06	1.36027	0.00158275
b3galnt2	ENSDARG00000046133	553716	96.8385	136.607	92.7405	172.477	226.057	204.83	0.887369	0.0832859
b3galt1a	ENSDARG00000079700	559521	52.1438	31.2244	32.2151	31.976	36.8238	17.8978	-0.415992	0.716638
b3galt2	ENSDARG00000102061	404633	856.648	604.973	433.44	718.976	1406.47	806.394	0.629365	0.286549
b3galt4	ENSDARG00000076218	101886595	12.1048	6.83034	1.95243	4.84485	1.02288	8.94888	-0.49566	1
b3galt6	ENSDARG00000038414	572324	94.9762	85.8672	120.075	71.7038	65.4646	64.6308	-0.576219	0.386641
B3GAT1	ENSDARG00000113928	100332644	26.0719	4.87882	8.78594	0	0	5.96592	-2.73652	0.189281
b3gat1a	ENSDARG00000040547	548607	77.2845	27.3214	44.9059	4.84485	11.2517	5.96592	-2.76503	0.00149387
b3gat1b	ENSDARG00000055279	100332851	306.345	95.6248	257.721	41.6657	25.5721	76.5627	-2.19744	0.000711177
b3gat2	ENSDARG00000030733	445060	261.65	187.347	400.248	48.4485	18.4119	37.7842	-3.01878	5.90682e-08
b3gat3	ENSDARG00000001939	192334	209.506	283.947	320.199	252.901	262.881	253.552	-0.0806132	0.918446
b3glcta	ENSDARG00000073917	799443	118.255	153.195	180.6	272.281	206.623	236.648	0.663048	0.211258
b3glctb	ENSDARG00000077740	564156	20.4851	10.7334	17.5719	16.4725	15.3433	7.95456	-0.295534	0.86365
B3GNT10	ENSDARG00000094253	101883349	7.44911	0.975763	2.92865	12.5966	5.11442	1.98864	0.792723	1
b3gnt2a	ENSDARG00000052376	405766	18.6228	17.5637	5.85729	1.93794	4.09154	2.98296	-2.22579	0.146293
b3gnt2b	ENSDARG00000091902	793362	217.887	193.201	188.41	461.23	693.516	634.376	1.5772	6.41917e-05
b3gnt2l	ENSDARG00000068219	797513	27.9342	18.5395	17.5719	3.87588	16.3662	15.9091	-0.828012	0.554251
b3gnt3.1	ENSDARG00000043482	494166	18.6228	8.78187	17.5719	13.5656	36.8238	16.9034	0.578978	0.687462
b3gnt3.2	ENSDARG00000054373	100002020	12.1048	3.90305	3.90486	6.78279	32.7323	1.98864	1.0547	0.603856
b3gnt3.3	ENSDARG00000093521	561028	13.0359	1.95153	8.78594	5.81382	4.09154	7.95456	-0.413828	0.86779
b3gnt3.4	ENSDARG00000058100	561172	27.003	20.491	14.6432	10.6587	20.4577	3.97728	-0.826819	0.568636
b3gnt5a	ENSDARG00000018971	336526	286.791	462.512	210.863	703.472	778.415	563.78	1.09126	0.0248657
b3gnt5b	ENSDARG00000004396	791470	29.7964	44.8851	63.454	51.3554	47.0527	37.7842	-0.0194959	0.988541
b3gnt7	ENSDARG00000038489	286748	28.8653	20.491	21.4767	24.2242	61.3731	85.5115	1.27114	0.135919
b3gnt7l	ENSDARG00000053133	407623	122.91	125.873	146.432	228.677	197.417	199.858	0.663633	0.192138
b3gnt9	ENSDARG00000041616	100034499	18.6228	7.80611	0	0	5.11442	14.9148	-0.402634	0.90256
b3gntl1	ENSDARG00000043431	619261	14.8982	28.2971	3.90486	21.3173	19.4348	21.875	0.411305	0.805312
b4galnt1a	ENSDARG00000061520	558684	10.2425	1.95153	5.85729	7.75176	1.02288	7.95456	-0.109476	1
b4galnt1b	ENSDARG00000077352	793635	27.9342	21.4668	26.3578	1.93794	1.02288	14.9148	-2.08286	0.119748
b4galnt2.1	ENSDARG00000094579	558078	8.38025	7.80611	4.88108	1.93794	2.04577	5.96592	-1.08283	1
b4galnt2.2	ENSDARG00000070605	557782	9.31139	8.78187	2.92865	0	6.13731	5.96592	-0.800731	1
b4galnt3a	ENSDARG00000078749	561505	15.8294	13.6607	16.5957	5.81382	0	5.96592	-1.9628	0.217241
b4galnt3b	ENSDARG00000058939	553524	137.809	80.9884	217.696	45.5416	30.6865	76.5627	-1.51394	0.0213403
b4galnt4a	ENSDARG00000046150	565184	346.384	277.117	333.866	92.0521	73.6477	72.5854	-2.00607	1.44205e-06
b4galnt4b	ENSDARG00000076701	559305	132.222	68.3034	104.455	58.1382	33.7552	32.8126	-1.28958	0.0450191
b4galt1	ENSDARG00000002634		5.58683	1.95153	1.95243	3.87588	1.02288	1.98864	-0.46189	1
b4galt1l	ENSDARG00000104404	768123	27.003	45.8609	26.3578	52.3244	56.2586	53.6933	0.710214	0.395186
b4galt2	ENSDARG00000077994	100148828	55.8683	20.491	13.667	24.2242	26.595	23.8637	-0.271538	0.854451
b4galt3	ENSDARG00000062329	561756	61.4552	78.0611	70.2875	54.2623	92.0596	81.5343	0.11876	0.906246
b4galt4	ENSDARG00000104042	492760	27.003	34.1517	30.2627	28.1001	47.0527	26.8466	0.15745	0.903172
b4galt5	ENSDARG00000037815	724080	18.6228	24.3941	8.78594	31.976	23.5263	15.9091	0.463351	0.746519
b4galt6	ENSDARG00000010301	393912	1524.27	1972.99	1009.41	1488.34	1996.67	2100	0.309474	0.628902
b4galt7	ENSDARG00000021899	445022	175.985	194.177	185.481	222.863	383.582	284.376	0.680784	0.189561
b4gat1	ENSDARG00000077583	101669768	281.204	219.547	260.65	109.494	237.309	174.006	-0.548466	0.379814
b9d1	ENSDARG00000011727	554150	67.9731	47.8124	41.0011	99.8039	55.2358	64.6308	0.486454	0.57113
b9d2	ENSDARG00000017385	436667	86.5959	85.8672	158.147	128.873	145.25	80.5399	0.101493	0.920818
baalca	ENSDARG00000077775	572429	1.86228	3.90305	10.7384	10.6587	0	2.98296	-0.268995	1
baalcb	ENSDARG00000089549	100536942	54.0061	22.4426	103.479	5.81382	26.595	6.96024	-2.19583	0.0248458
babam1	ENSDARG00000077526	445296	281.204	264.432	508.608	495.144	466.435	393.751	0.362576	0.579954
babam2	ENSDARG00000038863	550474	290.515	399.087	487.132	447.664	433.703	468.325	0.198026	0.772962
bace1	ENSDARG00000101716	403005	13.9671	4.87882	4.88108	0	5.11442	2.98296	-1.55862	1
bace2	ENSDARG00000044781	449818	57.7306	66.3519	21.4767	118.214	161.616	156.108	1.58187	0.00967949
bach1a	ENSDARG00000062553	678555	51.2126	34.1517	10.7384	41.6657	16.3662	49.716	0.164606	0.917304
bach1b	ENSDARG00000002196	553688	250.476	298.584	209.886	622.079	550.312	548.865	1.18144	0.00286565
bach2a	ENSDARG00000036569	557210	77.2845	80.9884	59.5491	31.976	22.5035	41.7615	-1.17788	0.0833891
bach2b	ENSDARG00000004074	555350	205.782	152.219	170.838	88.1763	52.1671	84.5172	-1.23329	0.0163919
bada	ENSDARG00000087993	564921	60.524	29.2729	22.453	171.508	122.746	121.307	1.8866	0.00162244
badb	ENSDARG00000054937	58100	117.324	207.838	198.172	162.787	238.332	156.108	0.0906366	0.920845
bag1	ENSDARG00000020895	558108	214.162	221.498	266.507	225.77	334.483	231.677	0.173419	0.814791
bag2	ENSDARG00000035005	393975	25.1408	124.898	63.454	395.34	138.089	178.978	1.73961	0.0157382
bag3	ENSDARG00000039486	445139	250.476	458.609	61.5016	2756.72	1674.46	2846.74	3.23952	4.51796e-07
bag4	ENSDARG00000043179	100001980	148.051	179.54	157.171	56.2003	144.227	172.017	-0.380648	0.653898
bag5	ENSDARG00000017316	569580	64.2486	43.9094	39.0486	70.7348	23.5263	35.7955	-0.177933	0.886799
bag6	ENSDARG00000075892	83910	430.186	547.403	619.897	637.582	851.04	675.143	0.437772	0.400941
bag6l	ENSDARG00000077531	751663	109.874	113.189	139.599	110.463	66.4875	80.5399	-0.493366	0.473466
bahcc1a	ENSDARG00000103739	797750	228.129	230.28	165.957	355.612	108.426	204.83	0.0996972	0.923273
bahcc1b	ENSDARG00000080009	794333	1710.5	1883.22	1829.43	1506.75	2216.59	1678.41	-0.00573675	0.993487
bahd1	ENSDARG00000086789	564712	535.405	584.482	455.893	1319.74	892.978	915.769	0.989452	0.0160948
baiap2a	ENSDARG00000062799	678518	248.614	194.177	212.815	199.608	199.462	219.745	-0.0834769	0.914829
baiap2b	ENSDARG00000103333		20.4851	21.4668	19.5243	20.3484	5.11442	0	-1.26832	0.456148
baiap2l1a	ENSDARG00000029305	387261	47.4881	50.7397	64.4302	29.0691	12.2746	53.6933	-0.774232	0.432175
baiap2l1b	ENSDARG00000031119	550528	25.1408	28.2971	26.3578	8.72073	9.20596	2.98296	-1.9324	0.0677738
baiap2l2a	ENSDARG00000016483	394210	30.7276	17.5637	14.6432	7.75176	6.13731	4.9716	-1.73863	0.14346
baiap2l2b	ENSDARG00000060933	564798	16.7605	24.3941	27.334	15.5035	5.11442	18.8921	-0.791226	0.553832
baiap3	ENSDARG00000079264	564728	47.4881	25.3699	97.6215	20.3484	5.11442	9.9432	-2.26387	0.0133008
bambia	ENSDARG00000055381	83496	351.971	419.578	291.888	1185.05	1351.23	1105.68	1.77597	1.34714e-06
bambib	ENSDARG00000099677	431736	228.129	443.972	249.911	776.145	641.349	880.968	1.31802	0.00355899
banf1	ENSDARG00000037009	334717	1313.84	2833.62	3037.01	1915.65	3264.02	3251.43	0.23086	0.771572
banp	ENSDARG00000017562	553659	207.644	170.759	179.624	158.911	320.163	203.836	0.290868	0.695198
bap1	ENSDARG00000063051	558885	256.063	231.256	240.149	189.918	188.211	156.108	-0.445461	0.417888
bard1	ENSDARG00000076733	100147913	26.0719	27.3214	12.6908	26.1622	6.13731	33.8069	0.00135053	0.998697
barhl1a	ENSDARG00000035508	550407	225.336	79.0368	190.362	49.4175	32.7323	30.8239	-2.13016	0.000392641
barhl1b	ENSDARG00000019013	553186	55.8683	22.4426	27.334	1.93794	0	10.9375	-3.03507	0.0143197
barhl2	ENSDARG00000104361	100001699	525.162	152.219	686.279	26.1622	15.3433	20.8807	-4.44871	4.86675e-12
barx1	ENSDARG00000007407	553644	360.351	481.051	383.653	380.805	638.28	456.393	0.268248	0.683711
barx2	ENSDARG00000041098	100002200	9.31139	8.78187	5.85729	19.3794	5.11442	6.96024	0.394918	0.853128
basp1	ENSDARG00000053358	569631	452.534	249.795	1306.18	182.166	132.975	169.034	-2.05233	0.00103259
batf	ENSDARG00000011818	564589	4.65569	7.80611	5.85729	6.78279	0	1.98864	-1.05569	1
batf3	ENSDARG00000042577	751677	11.1737	18.5395	31.2389	14.5345	6.13731	7.95456	-1.08705	0.417596
baxa	ENSDARG00000020623	58081	339.866	455.682	407.082	646.303	635.211	463.353	0.537031	0.279155
baxb	ENSDARG00000030881	503609	111.737	169.783	153.266	381.774	337.552	298.296	1.22724	0.00496311
baz1a	ENSDARG00000099745	334173	1202.1	1939.82	1097.27	1160.83	1163.02	1293.61	-0.228783	0.728558
baz1b	ENSDARG00000102832	571727	616.414	777.684	318.246	346.891	309.934	380.825	-0.722642	0.195894
baz2a	ENSDARG00000102974	450079	1557.8	1787.6	1921.19	1310.05	1727.65	1748.02	-0.138144	0.829536
baz2ba	ENSDARG00000057782	561095	1712.36	2040.32	1500.44	2157.9	1639.68	1682.39	0.0610236	0.931762
bbc3	ENSDARG00000069282	751763	145.258	170.759	174.743	215.111	248.561	160.086	0.346011	0.596346
bbip1	ENSDARG00000071046	795943	238.372	270.286	380.724	473.826	378.467	298.296	0.371733	0.556026
bbox1	ENSDARG00000036135	572649	216.955	237.111	178.647	259.684	653.623	423.58	1.07901	0.0395407
bbs1	ENSDARG00000075169	568986	135.015	122.946	94.6929	119.183	91.0367	91.4775	-0.225087	0.782718
bbs10	ENSDARG00000069515	100034535	50.2815	20.491	41.9773	19.3794	51.1442	25.8523	-0.228445	0.868081
bbs12	ENSDARG00000016112	570583	92.1828	45.8609	59.5491	31.007	56.2586	55.6819	-0.46845	0.617523
bbs2	ENSDARG00000041621	259187	227.198	207.838	229.411	165.694	211.737	192.898	-0.220578	0.746799
bbs4	ENSDARG00000063522	768303	93.1139	48.7882	66.3827	52.3244	30.6865	55.6819	-0.586535	0.491099
bbs5	ENSDARG00000039827	393269	142.464	119.043	115.193	106.587	112.517	69.6024	-0.384097	0.596789
bbs7	ENSDARG00000059911	557491	243.958	217.595	190.362	146.314	213.783	140.199	-0.38235	0.54983
bbs9	ENSDARG00000079217	100333716	82.8714	61.4731	28.3102	32.945	34.7781	45.7387	-0.606492	0.523742
bbx	ENSDARG00000012699	100005540	271.893	449.827	321.175	416.657	363.124	333.097	0.0939111	0.903923
bcam	ENSDARG00000090190	767689	770.983	1104.56	1778.66	531.965	259.813	245.597	-1.81635	0.000377904
bcan	ENSDARG00000099412	334113	357.557	367.863	687.256	62.983	49.0985	49.716	-3.12558	3.50926e-11
bcap29	ENSDARG00000016231	554151	39.1078	40.9821	40.0248	81.3935	48.0756	41.7615	0.512276	0.571012
bcap31	ENSDARG00000044972	368488	149.913	163.928	115.193	203.484	222.989	180.966	0.501497	0.385175
bcar1	ENSDARG00000056525	568309	584.755	1012.84	740.948	1451.52	1987.46	1492.47	1.07645	0.0110544
bcar3	ENSDARG00000016981	570610	70.7666	58.5458	36.12	58.1382	83.8765	76.5627	0.400866	0.65328
bcas2	ENSDARG00000043631	493614	456.258	644.004	640.397	608.513	1001.4	856.11	0.50256	0.344972
bcas3	ENSDARG00000090764	393594	235.578	237.111	289.936	447.664	431.657	316.194	0.648674	0.179654
bcat1	ENSDARG00000045568	337412	267.237	113.189	217.696	32.945	43.984	43.7501	-2.31007	1.80497e-05
bcat2	ENSDARG00000054849	436949	374.318	584.482	928.381	784.866	786.598	630.399	0.222622	0.774639
bccip	ENSDARG00000004948	541348	676.007	1827.61	1759.14	2873.97	1788	2119.89	0.669985	0.273597
bcdin3d	ENSDARG00000074111	568375	5.58683	4.87882	10.7384	4.84485	12.2746	25.8523	1.0193	0.549705
bckdha	ENSDARG00000040555	554124	365.006	459.585	535.942	330.419	614.754	583.666	0.168216	0.827225
bckdhb	ENSDARG00000014676	569980	385.492	577.652	779.996	700.565	696.584	795.456	0.3311	0.600815
bckdhbl	ENSDARG00000093569	555648	305.414	303.462	355.342	574.599	654.646	535.939	0.87239	0.0310603
bckdk	ENSDARG00000016904	282677	628.519	780.611	836.617	1885.62	1985.42	1457.67	1.24665	0.000889405
bcl10	ENSDARG00000077130	100334750	94.9762	87.8187	39.0486	54.2623	48.0756	71.5911	-0.35136	0.720035
bcl11aa	ENSDARG00000061352	678650	382.698	190.274	250.887	101.742	142.181	146.165	-1.07912	0.0382777
bcl11ab	ENSDARG00000063153	566491	70.7666	101.479	73.2162	77.5176	23.5263	51.7047	-0.682843	0.423143
bcl11ba	ENSDARG00000062510	100093707	2054.09	975.763	2871.05	284.877	403.016	303.268	-2.57386	9.00225e-08
bcl2a	ENSDARG00000094704	570772	271.893	452.754	280.174	749.014	688.401	527.984	0.968032	0.0353517
bcl2b	ENSDARG00000089109	100007048	126.635	57.57	293.841	39.7278	23.5263	37.7842	-2.24137	0.0015157
bcl2l1	ENSDARG00000008434	114401	256.994	449.827	288.96	661.807	434.726	711.933	0.861096	0.085835
bcl2l10	ENSDARG00000026766	373113	764.465	1097.73	1019.17	2345.88	1503.64	1278.7	0.831795	0.0767609
bcl2l11	ENSDARG00000079144	100190951	11.1737	14.6365	5.85729	22.2863	6.13731	16.9034	0.518822	0.772158
bcl2l13	ENSDARG00000062370	559355	517.713	541.549	415.868	285.846	378.467	231.677	-0.719475	0.135762
bcl2l16	ENSDARG00000114237	100359374	86.5959	51.7155	66.3827	67.8279	59.3273	53.6933	-0.179053	0.857039
bcl3	ENSDARG00000087832	565656	56.7995	65.3762	26.3578	34.8829	20.4577	30.8239	-0.784997	0.400104
bcl6aa	ENSDARG00000070864	393707	118.255	129.777	95.6691	31.976	56.2586	48.7217	-1.32847	0.0197137
bcl6ab	ENSDARG00000069295	100001936	154.569	145.389	136.67	147.283	185.142	108.381	0.0134319	0.989024
bcl6b	ENSDARG00000069335	793278	30.7276	13.6607	37.0962	84.3004	45.0069	25.8523	0.929465	0.349779
bcl7a	ENSDARG00000052907	57952	956.28	890.872	1448.7	461.23	908.321	675.143	-0.688866	0.195894
bcl7ba	ENSDARG00000111877	406444	122.91	129.777	110.312	241.274	228.103	184.944	0.850033	0.0783157
bcl7bb	ENSDARG00000040396	81595	219.749	321.026	325.08	374.022	624.982	442.473	0.735388	0.146382
bcl9	ENSDARG00000036687	449616	896.687	887.945	999.645	1083.31	1383.96	1060.94	0.341604	0.505319
bcl9l	ENSDARG00000055054	449532	173.192	201.007	185.481	229.646	321.186	293.324	0.592829	0.244204
bco1	ENSDARG00000104256	84039	136.877	179.54	179.624	483.516	453.138	355.967	1.38205	0.000773225
bco1l	ENSDARG00000103659	393580	15.8294	15.6122	17.5719	67.8279	55.2358	12.9262	1.47257	0.130593
bco2a	ENSDARG00000055722	793849	106.15	69.2792	73.2162	64.921	73.6477	131.25	0.117372	0.910995
bco2b	ENSDARG00000041715	678554	49.3504	61.4731	33.1913	44.5726	49.0985	20.8807	-0.330487	0.772456
bco2l	ENSDARG00000027620	84041	20.4851	64.4004	37.0962	84.3004	70.579	125.284	1.20095	0.101112
bcor	ENSDARG00000017798	402921	1314.77	1274.35	1156.82	1249	1473.98	1035.09	0.00462432	0.994342
bcorl1	ENSDARG00000077912	792710	263.512	219.547	246.983	166.663	209.691	239.631	-0.245307	0.717154
bcr	ENSDARG00000079286	568320	615.483	301.511	618.921	395.34	569.747	566.763	-0.0039835	0.995811
bcs1l	ENSDARG00000012295	394157	84.7336	109.286	147.409	89.1452	102.288	84.5172	-0.306939	0.700218
bdh1	ENSDARG00000059388	100037356	43.7635	34.1517	41.9773	80.4245	62.396	71.5911	0.838628	0.221084
bdh2	ENSDARG00000052696	550507	64.2486	187.347	257.721	218.987	247.538	182.955	0.351153	0.700962
bdkrb1	ENSDARG00000020744	368199	15.8294	1.95153	1.95243	2.90691	1.02288	8.94888	-0.617979	1
bdnf	ENSDARG00000018817	58118	495.366	318.099	403.177	118.214	198.44	117.33	-1.48778	0.00122102
bean1	ENSDARG00000087413	101885923	427.393	244.917	276.269	104.649	141.158	89.4888	-1.5009	0.00157654
becn1	ENSDARG00000079128	393846	192.746	126.849	102.503	81.3935	247.538	219.745	0.377645	0.672577
bend3	ENSDARG00000076903	565716	211.369	240.038	188.41	437.974	530.877	339.063	1.03147	0.018449
BEND4	ENSDARG00000113607	566937	33.521	20.491	12.6908	31.976	6.13731	15.9091	-0.303061	0.859437
bend5	ENSDARG00000075624	566161	35.3833	20.491	5.85729	29.0691	5.11442	4.9716	-0.655301	0.721091
best1	ENSDARG00000078331	560608	14.8982	13.6607	4.88108	1.93794	6.13731	6.96024	-1.15643	0.530649
best2	ENSDARG00000079163	567214	8.38025	11.7092	2.92865	4.84485	0	0	-2.23751	1
best4	ENSDARG00000078455	563711	6.51797	4.87882	0	4.84485	0	1.98864	-0.735068	1
bet1	ENSDARG00000034885	415135	40.039	101.479	135.694	111.432	181.051	141.193	0.646134	0.411414
bet1l	ENSDARG00000032037	445493	111.737	190.274	238.197	477.702	295.614	205.824	0.858493	0.16238
BFSP1	ENSDARG00000074919		12.1048	8.78187	5.85729	6.78279	0	0	-1.97056	1
bfsp2	ENSDARG00000011998	494090	21.4162	11.7092	8.78594	30.0381	36.8238	10.9375	0.890172	0.487204
bglapl	ENSDARG00000104467	337724	30.7276	51.7155	6.83351	63.952	68.5333	106.392	1.4198	0.105139
bgna	ENSDARG00000017884	431774	91.2516	146.365	73.2162	113.369	495.076	216.762	1.4084	0.0382904
bgnb	ENSDARG00000002945	792197	178.779	179.54	313.365	2558.08	1817.67	1364.21	3.0954	3.53487e-12
bhlha15	ENSDARG00000045166	777671	9.31139	7.80611	2.92865	4.84485	0	0	-2.03919	1
bhlha9	ENSDARG00000103981	323481	8.38025	6.83034	0.976215	8.72073	0	2.98296	-0.464937	1
bhlhe22	ENSDARG00000058039	393930	222.542	98.5521	242.101	27.1312	9.20596	17.8978	-3.37337	9.1174e-08
bhlhe23	ENSDARG00000037588	559796	590.342	263.456	182.552	37.7898	15.3433	16.9034	-3.88514	1.08643e-09
bhlhe40	ENSDARG00000004060	324413	1713.3	1615.86	2154.51	2227.66	1916.89	2285.94	0.229813	0.687462
bhlhe41	ENSDARG00000041691	563771	292.378	1053.82	1721.07	1158.89	410.177	1062.93	-0.220664	0.846895
bhmt	ENSDARG00000013430	322228	1252.38	2852.16	2011	10278.8	12588.6	10285.2	2.43862	5.74432e-09
bicc1a	ENSDARG00000061682	568201	262.581	256.626	132.765	926.335	1230.53	948.582	2.25167	1.46025e-07
bicc1b	ENSDARG00000070497	571411	56.7995	179.54	65.4064	274.219	226.057	215.768	1.24733	0.0458379
bicc2	ENSDARG00000076557	402785	36.3144	35.1275	44.9059	5.81382	13.2975	1.98864	-2.46727	0.010704
bicd1a	ENSDARG00000079496	556758	16.7605	15.6122	7.80972	16.4725	2.04577	8.94888	-0.546291	0.781477
BICD2	ENSDARG00000098215	557383	72.6288	45.8609	41.9773	67.8279	45.0069	53.6933	0.0532162	0.964832
bicd2	ENSDARG00000075571	557383	86.5959	50.7397	21.4767	37.7898	41.9383	65.6251	-0.128864	0.924177
bicdl1	ENSDARG00000074761	100537719	24.2096	28.2971	4.88108	5.81382	0	3.97728	-2.54477	0.103972
bicdl2	ENSDARG00000052427	777640	70.7666	135.631	107.384	223.832	68.5333	84.5172	0.265352	0.803325
bicdl2l	ENSDARG00000091669	100334848	51.2126	64.4004	128.86	39.7278	29.6636	71.5911	-0.793393	0.356784
bicra	ENSDARG00000061159	386775	791.468	652.786	577.92	550.375	693.516	677.132	-0.0741693	0.918446
bicral	ENSDARG00000016089	559084	160.156	143.437	126.908	133.718	108.426	92.4718	-0.363446	0.597794
bida	ENSDARG00000069290	559425	150.845	165.88	151.313	431.192	385.627	320.171	1.28062	0.00162897
bik	ENSDARG00000045549	564030	133.153	283.947	327.032	69.7658	33.7552	39.7728	-2.37513	2.57837e-05
bin1a	ENSDARG00000042114	563561	30.7276	14.6365	15.6194	1.93794	6.13731	0	-2.92537	0.0417471
bin1b	ENSDARG00000058820	447863	84.7336	101.479	45.8821	108.525	94.1054	69.6024	0.230081	0.813559
bin2a	ENSDARG00000003219	492780	25.1408	18.5395	55.6443	0	13.2975	8.94888	-2.16294	0.0927902
bin2b	ENSDARG00000010255	327387	56.7995	152.219	127.884	213.173	230.149	86.5059	0.653665	0.415616
bin3	ENSDARG00000099651	323976	359.42	429.336	667.731	462.199	509.396	518.041	0.0325707	0.969888
birc2	ENSDARG00000044619	373107	1143.44	1463.65	1627.35	2305.18	2097.94	1884.24	0.570335	0.197082
birc5a	ENSDARG00000075621	373110	224.404	453.73	489.084	366.271	380.513	317.188	-0.133407	0.873051
birc6	ENSDARG00000074166	796547	671.351	861.599	591.587	838.159	524.74	816.337	0.0367843	0.964694
birc6-as2	ENSDARG00000097706	101885944	127.566	96.6006	248.935	51.3554	5.11442	14.9148	-2.7252	0.000824191
birc7	ENSDARG00000058082	100073331	11.1737	3.90305	3.90486	7.75176	0	4.9716	-0.575162	1
bivm	ENSDARG00000061409		13.0359	13.6607	8.78594	7.75176	4.09154	6.96024	-0.914682	0.593251
blcap	ENSDARG00000052073	57918	527.025	841.108	865.903	1333.3	822.399	968.468	0.483983	0.387115
blf	ENSDARG00000043126	503516	30.7276	72.2065	62.4778	2.90691	23.5263	27.841	-1.60925	0.108115
blk	ENSDARG00000007783	567764	34.4521	11.7092	52.7156	30.0381	12.2746	14.9148	-0.787425	0.529542
blm	ENSDARG00000077089	572540	123.841	162.953	110.312	59.1072	130.929	110.37	-0.40319	0.611299
blmh	ENSDARG00000025977	336541	339.866	442.997	526.18	434.099	553.381	443.467	0.128507	0.859727
blnk	ENSDARG00000042722	405764	40.9701	36.1032	45.8821	6.78279	2.04577	2.98296	-3.37278	0.000244972
bloc1s1	ENSDARG00000014171	556597	86.5959	153.195	177.671	205.422	119.677	116.335	0.0813406	0.935906
bloc1s2	ENSDARG00000046081	606665	111.737	152.219	211.839	143.408	188.211	177.983	0.0992134	0.911543
bloc1s3	ENSDARG00000068828	553529	83.8025	88.7945	99.574	76.5486	58.3044	49.716	-0.559787	0.428465
bloc1s4	ENSDARG00000007597	445081	154.569	169.783	210.863	200.577	201.508	206.819	0.186277	0.796341
bloc1s5	ENSDARG00000111747	324781	86.5959	116.116	146.432	111.432	82.8536	117.33	-0.163392	0.854486
bloc1s6	ENSDARG00000042933	791215	189.021	323.953	344.604	601.73	499.168	433.524	0.839671	0.0884187
blvra	ENSDARG00000059857	767661	21.4162	18.5395	24.4054	26.1622	6.13731	9.9432	-0.60467	0.684699
blvrb	ENSDARG00000096829	436959	111.737	84.8914	130.813	124.028	145.25	74.574	0.0703482	0.944372
blzf1	ENSDARG00000011299	114452	173.192	205.886	259.673	238.367	241.401	174.006	0.033719	0.969888
bmb	ENSDARG00000096603	559540	54.9372	102.455	43.9297	39.7278	39.8925	40.7671	-0.741526	0.363596
bmf2	ENSDARG00000041414	751764	45.6258	39.0305	35.1438	32.945	25.5721	22.8694	-0.557579	0.569589
bmi1a	ENSDARG00000006010	321505	268.168	202.959	298.722	250.963	348.804	235.654	0.11771	0.88076
bmi1b	ENSDARG00000013076	394249	424.599	334.687	545.704	448.633	609.639	457.387	0.215825	0.754291
bmp10	ENSDARG00000061769	562533	28.8653	10.7334	14.6432	14.5345	0	1.98864	-1.70959	0.335814
bmp10l	ENSDARG00000109233		17.6916	10.7334	5.85729	6.78279	2.04577	6.96024	-1.11731	0.539538
bmp15	ENSDARG00000037491	334183	27.003	14.6365	8.78594	6.78279	11.2517	14.9148	-0.616323	0.703681
bmp16	ENSDARG00000103679	100329171	180.641	139.534	191.338	594.948	833.651	589.632	1.98008	6.09605e-07
bmp1a	ENSDARG00000028071	572452	340.797	655.713	526.18	2092.98	1341	1111.65	1.57803	0.0005121
bmp1b	ENSDARG00000028053	559877	108.943	119.043	157.171	187.011	169.799	143.182	0.376777	0.570946
bmp2a	ENSDARG00000013409	30631	114.53	220.523	145.456	637.582	653.623	850.144	2.15627	4.51017e-07
bmp2b	ENSDARG00000041430	30632	223.473	377.62	361.2	1030.98	1076.07	875.002	1.63199	4.5819e-05
bmp2k	ENSDARG00000020009	494101	405.977	532.767	553.514	442.819	607.593	621.45	0.163976	0.812164
bmp3	ENSDARG00000060526	777717	112.668	153.195	64.4302	196.701	440.863	391.762	1.63966	0.00276295
bmp4	ENSDARG00000019995	30612	307.276	665.471	449.059	1667.6	2938.75	2028.41	2.22244	7.05114e-07
bmp5	ENSDARG00000101701	394026	250.476	442.021	240.149	984.474	1215.19	1273.72	1.89706	5.89251e-06
bmp6	ENSDARG00000015686	503761	51.2126	40.9821	62.4778	110.463	197.417	113.353	1.44501	0.0100593
bmp7a	ENSDARG00000018260	30584	27.003	28.2971	33.1913	13.5656	39.8925	10.9375	-0.460513	0.738584
bmp7b	ENSDARG00000063230	557567	133.153	260.529	121.051	352.705	559.518	460.37	1.41513	0.0045494
bmp8a	ENSDARG00000035677	561963	58.6618	128.801	63.454	187.98	145.25	101.421	0.793288	0.249996
bmper	ENSDARG00000101980	338246	51.2126	69.2792	14.6432	79.4555	247.538	178.978	1.90405	0.00891762
bmpr1aa	ENSDARG00000019728	58145	767.258	829.399	755.591	1347.84	2354.68	1468.61	1.13639	0.00591988
bmpr1ab	ENSDARG00000105045	447846	323.105	493.736	228.434	575.568	1175.29	761.649	1.26519	0.0126854
bmpr1ba	ENSDARG00000104100	30742	241.165	345.42	192.314	558.127	642.371	483.24	1.11218	0.0126531
bmpr1bb	ENSDARG00000102742	100149664	35.3833	41.9578	24.4054	61.0451	29.6636	21.875	0.14696	0.91567
bmpr2a	ENSDARG00000011941	562822	254.201	229.304	178.647	295.536	241.401	170.029	0.0944445	0.910995
bmpr2b	ENSDARG00000020057	555655	126.635	125.873	53.6919	55.2313	84.8994	61.6479	-0.602513	0.446713
bms1	ENSDARG00000054154	553241	229.991	364.936	244.054	358.519	362.101	472.302	0.50794	0.359523
bmt2	ENSDARG00000062181	558558	14.8982	15.6122	3.90486	0.96897	5.11442	8.94888	-1.19772	0.540319
BNC1	ENSDARG00000100757	568786	193.677	121.97	168.885	60.0761	181.051	147.159	-0.320235	0.723554
bnc2	ENSDARG00000069989	559327	1140.65	1058.7	937.167	2055.19	4283.84	2869.61	1.55377	0.000188822
bnip1a	ENSDARG00000078259	565822	3.72456	0	0	0	9.20596	0.99432	1.44252	1
bnip1b	ENSDARG00000104280	795732	110.806	115.14	120.075	196.701	173.89	129.262	0.530812	0.374262
bnip2	ENSDARG00000013397	394197	63.3174	81.9641	35.1438	84.3004	72.6248	49.716	0.195774	0.856288
bnip3	ENSDARG00000099961	336116	8.38025	0.975763	2.92865	0	0	13.9205	0.178124	1
bnip3la	ENSDARG00000025468	323563	27.9342	13.6607	10.7384	23.2553	20.4577	11.9318	0.0869428	0.962007
bnip3lb	ENSDARG00000028067	554650	356.626	304.438	224.53	521.306	799.896	739.774	1.21835	0.00464067
bnip4	ENSDARG00000022832	568155	206.713	217.595	251.864	512.585	664.875	411.649	1.23276	0.00325936
bnipl	ENSDARG00000060435	100149386	13.0359	35.1275	26.3578	13.5656	12.2746	12.9262	-0.941476	0.428012
boc	ENSDARG00000074335	334628	2844.63	4106.99	2589.9	4142.35	9221.3	5872.46	1.01152	0.0368803
bod1	ENSDARG00000103922	767743	177.848	180.516	328.985	170.539	263.904	148.154	-0.238635	0.776682
bod1l1	ENSDARG00000089505	100332682	130.359	152.219	60.5254	137.594	98.1969	98.4377	-0.037724	0.973031
boka	ENSDARG00000052129	445218	66.1109	66.3519	115.193	202.515	211.737	179.972	1.26308	0.0124151
bokb	ENSDARG00000008807	394160	38.1767	20.491	24.4054	41.6657	37.8467	13.9205	0.168723	0.908511
bola1	ENSDARG00000039915	445163	105.219	99.5279	212.815	175.384	191.279	158.097	0.329912	0.677542
BOLA2	ENSDARG00000111714	553698	72.6288	149.292	222.577	215.111	132.975	182.955	0.257361	0.782735
bola3	ENSDARG00000098130	445131	67.9731	109.286	189.386	179.259	184.119	112.358	0.376267	0.66293
bop1	ENSDARG00000063627	777627	163.88	291.753	202.077	267.436	165.707	299.29	0.155661	0.855217
bora	ENSDARG00000042688	555606	73.56	119.043	65.4064	31.007	30.6865	61.6479	-1.06452	0.140292
borcs5	ENSDARG00000077830	449650	49.3504	55.6185	75.1686	40.6967	51.1442	45.7387	-0.388816	0.667096
borcs7	ENSDARG00000055070	664759	74.4911	31.2244	90.788	72.6727	101.266	67.6138	0.297232	0.773198
borcs8	ENSDARG00000071339	558180	27.003	55.6185	101.526	83.3314	68.5333	47.7274	0.117257	0.926554
bpgm	ENSDARG00000070826	436903	215.093	122.946	167.909	123.059	251.63	162.074	0.0846062	0.930105
bphl	ENSDARG00000102877	402804	73.56	122.946	87.8594	148.252	156.501	194.887	0.813547	0.146663
bpifcl	ENSDARG00000099980	100003132	21.4162	38.0548	28.3102	14.5345	5.11442	23.8637	-1.01048	0.39296
bpnt1	ENSDARG00000043684	436627	93.1139	84.8914	155.218	120.152	163.662	168.04	0.439425	0.539363
bptf	ENSDARG00000077361	324479	1537.31	1636.36	1110.93	1127.88	1280.65	1329.41	-0.196951	0.752323
braf	ENSDARG00000017661	403065	59.5929	76.1096	26.3578	43.6036	43.984	31.8183	-0.440879	0.673796
brap	ENSDARG00000008560	436739	108.012	88.7945	104.455	257.746	168.776	94.4604	0.790363	0.22504
brat1	ENSDARG00000062585	678547	134.084	240.038	141.551	172.477	125.815	210.796	-0.0181366	0.986111
brca2	ENSDARG00000079015	566758	198.333	247.844	181.576	169.57	211.737	290.342	0.0974642	0.90727
brcc3	ENSDARG00000098242	100333845	13.0359	7.80611	20.5005	29.0691	2.04577	4.9716	-0.192907	0.934456
brd1a	ENSDARG00000013596	569574	288.653	190.274	204.029	143.408	190.257	131.25	-0.555327	0.342258
brd1b	ENSDARG00000051798	100009661	1042.88	1000.16	803.425	949.591	854.109	805.399	-0.125627	0.846707
brd2a	ENSDARG00000022280	30445	3588.61	5230.09	1721.07	7298.28	9763.43	6890.64	1.18432	0.0213796
brd2b	ENSDARG00000046087	569354	114.53	87.8187	86.8832	108.525	63.4188	84.5172	-0.173212	0.850276
brd3a	ENSDARG00000006527	327372	511.195	603.998	486.155	622.079	661.806	586.649	0.224167	0.703899
brd3b	ENSDARG00000100129	327108	2724.51	3496.16	3199.06	3689.84	4467.96	3935.52	0.360457	0.456346
brd4	ENSDARG00000078904	570531	1313.84	1993.48	1629.3	2164.68	1711.29	1767.9	0.193218	0.760293
brd7	ENSDARG00000008380	406675	465.569	551.306	623.802	570.723	598.387	503.126	0.027552	0.971338
brd8	ENSDARG00000025071	337414	609.896	648.883	688.232	517.43	681.241	557.814	-0.14863	0.818522
brd9	ENSDARG00000017143	393245	229.06	177.589	174.743	241.274	201.508	171.023	0.0781791	0.924571
brdt	ENSDARG00000102802	333996	2240.32	4133.33	1646.88	3664.64	3802.06	4376	0.562242	0.335854
brf1a	ENSDARG00000017835	334402	83.8025	103.431	105.431	173.446	156.501	168.04	0.767245	0.14142
brf1b	ENSDARG00000005002	334316	196.47	197.104	175.719	125.966	187.188	146.165	-0.310069	0.645345
brf2	ENSDARG00000002060	445142	35.3833	38.0548	43.9297	85.2694	48.0756	15.9091	0.347581	0.78429
bri3	ENSDARG00000086332	100002236	302.62	315.172	302.627	835.252	607.593	700.002	1.21926	0.00135274
bri3bp	ENSDARG00000010108	327046	37.2456	28.2971	17.5719	24.2242	4.09154	0	-1.55018	0.323062
bricd5	ENSDARG00000056247	792755	58.6618	217.595	51.7394	8.72073	13.2975	26.8466	-2.74707	0.000777811
brinp1	ENSDARG00000078302	100334375	54.9372	24.3941	29.2865	19.3794	9.20596	16.9034	-1.25501	0.198861
brinp2	ENSDARG00000014302	561009	154.569	75.1338	77.121	47.4795	9.20596	12.9262	-2.13745	0.0074836
brinp3a.1	ENSDARG00000076351	569746	262.581	203.935	352.414	122.09	284.362	126.279	-0.620797	0.365827
brinp3a.2	ENSDARG00000061051	100001603	149.913	68.3034	135.694	103.68	52.1671	50.7103	-0.776354	0.299251
brinp3b	ENSDARG00000075352	100330048	100.563	81.9641	95.6691	54.2623	56.2586	92.4718	-0.454824	0.556492
brip1	ENSDARG00000074410	794038	189.952	196.128	123.979	154.066	147.295	142.188	-0.201683	0.794115
brk1	ENSDARG00000041974	415187	793.33	993.327	1799.17	1012.57	1312.36	1341.34	0.0320458	0.971965
brms1	ENSDARG00000051955	791681	323.105	295.656	362.176	274.219	517.58	359.944	0.231365	0.747437
brms1la	ENSDARG00000006235	792017	710.459	617.658	732.162	796.493	1119.04	871.025	0.435559	0.380139
brms1lb	ENSDARG00000018047	562889	155.5	66.3519	106.407	121.121	102.288	108.381	0.0149859	0.989257
brox	ENSDARG00000013659	492786	142.464	120.019	251.864	304.257	185.142	179.972	0.380465	0.622244
brpf1	ENSDARG00000103665		49.3504	29.2729	15.6194	38.7588	43.984	26.8466	0.216044	0.873142
brpf3a	ENSDARG00000070513	100149254	82.8714	59.5216	61.5016	89.1452	37.8467	50.7103	-0.197722	0.854281
brpf3b	ENSDARG00000074238	100003354	61.4552	88.7945	41.0011	52.3244	66.4875	37.7842	-0.28873	0.781318
brsk2b	ENSDARG00000077791	100149571	268.168	146.365	271.388	49.4175	34.7781	31.8183	-2.56304	5.4001e-07
brwd1	ENSDARG00000074747	798858	758.878	614.731	567.181	434.099	772.278	564.774	-0.132169	0.859782
brwd3	ENSDARG00000035540	553209	86.5959	88.7945	101.526	36.8209	33.7552	45.7387	-1.25112	0.0315529
bscl2	ENSDARG00000037008	567403	133.153	91.7218	135.694	154.066	302.774	289.347	1.04885	0.0513834
bscl2l	ENSDARG00000025912	541427	43.7635	39.0305	118.122	30.0381	12.2746	60.6535	-0.963396	0.351925
bsdc1	ENSDARG00000052623	794882	474.881	614.731	661.874	869.166	1001.4	728.837	0.569663	0.226507
bsg	ENSDARG00000019881	337692	2658.4	1562.2	3323.04	4262.5	4434.2	5183.39	0.87968	0.0581011
bsk146	ENSDARG00000099069	791840	14.8982	14.6365	4.88108	2.90691	2.04577	6.96024	-1.53039	0.388062
bsnb	ENSDARG00000079161	101175706	885.513	635.222	1322.77	88.1763	72.6248	149.148	-3.19738	3.76688e-11
bsnd	ENSDARG00000086265	497323	4.65569	13.6607	0	14.5345	1.02288	20.8807	0.993995	0.687659
bspry	ENSDARG00000104875	559377	15.8294	24.3941	13.667	14.5345	12.2746	29.8296	0.0723722	0.968194
bsx	ENSDARG00000068976	573364	24.2096	10.7334	51.7394	7.75176	1.02288	1.98864	-3.00119	0.0170178
btaf1	ENSDARG00000060089	565357	486.055	463.488	546.681	447.664	788.644	478.268	0.196385	0.782548
btbd10a	ENSDARG00000062674	560466	659.246	625.464	658.945	421.502	562.586	310.228	-0.58671	0.244204
btbd10b	ENSDARG00000020252	557247	664.833	882.09	817.092	1316.83	1103.69	1154.41	0.596766	0.168701
btbd11a	ENSDARG00000063255	562893	185.297	206.862	235.268	369.178	474.618	489.206	1.08722	0.00879538
btbd11b	ENSDARG00000063040	100034519	24.2096	28.2971	6.83351	32.945	33.7552	28.8353	0.68627	0.568936
btbd16	ENSDARG00000027710	565632	1.86228	10.7334	5.85729	5.81382	0	1.98864	-1.23417	1
btbd17a	ENSDARG00000099321	563263	148.051	50.7397	60.5254	64.921	55.2358	59.6592	-0.528939	0.558599
btbd17b	ENSDARG00000102472	563672	17.6916	7.80611	10.7384	18.4104	0	6.96024	-0.511705	0.831501
btbd2a	ENSDARG00000042091	565970	557.752	530.815	999.645	429.254	550.312	427.558	-0.569529	0.305296
btbd2b	ENSDARG00000104653	555499	26.0719	31.2244	17.5719	27.1312	9.20596	28.8353	-0.198801	0.897941
btbd3a	ENSDARG00000005544	563691	28.8653	14.6365	14.6432	43.6036	9.20596	25.8523	0.436306	0.773693
btbd3b	ENSDARG00000087517	562593	28.8653	3.90305	10.7384	5.81382	8.18308	3.97728	-1.27848	0.449484
btbd6a	ENSDARG00000076440	100141360	588.48	520.082	355.342	726.727	1555.81	963.496	1.14868	0.0174797
btbd6b	ENSDARG00000032369	553533	770.052	829.399	745.829	466.075	871.498	578.694	-0.291607	0.646743
btbd7	ENSDARG00000003069	568372	86.5959	64.4004	26.3578	39.7278	58.3044	48.7217	-0.274467	0.811331
btbd9	ENSDARG00000068983	557659	108.012	147.34	111.289	162.787	192.302	158.097	0.485179	0.421412
btc	ENSDARG00000098112	503869	54.0061	108.31	111.289	64.921	127.861	58.6649	-0.12196	0.914219
btd	ENSDARG00000099596	555376	47.4881	82.9399	68.3351	106.587	126.838	108.381	0.782646	0.206751
btf3	ENSDARG00000035400	556625	5289.8	12480	9565.94	20859	12511.9	16527.6	0.868222	0.0917172
btf3l4	ENSDARG00000089681	393667	362.213	661.568	909.833	768.393	605.548	587.643	0.0209009	0.982722
btg1	ENSDARG00000027249	114432	8152.12	14819.9	6352.23	24299.8	21402.8	20236.4	1.16904	0.010718
btg2	ENSDARG00000020298	30079	12900.9	19724.1	1125.58	57942.5	52816.6	35953.6	2.12001	0.140109
btg3	ENSDARG00000069065	492479	667.627	908.436	670.66	1430.2	1463.75	1214.07	0.870658	0.0295411
btk	ENSDARG00000004433	568653	25.1408	34.1517	80.0497	37.7898	54.2129	20.8807	-0.303584	0.816823
btr01	ENSDARG00000051965	563047	22.3473	18.5395	14.6432	9.6897	2.04577	13.9205	-1.11209	0.444782
btr02	ENSDARG00000052215	562439	39.1078	35.1275	87.8594	24.2242	29.6636	35.7955	-0.853739	0.342498
btr04	ENSDARG00000095113	767728	102.425	110.261	155.218	115.307	177.982	136.222	0.223271	0.784049
btr05	ENSDARG00000074813	794264	19.5539	40.9821	4.88108	26.1622	13.2975	8.94888	-0.433074	0.807218
btr06	ENSDARG00000054184	100151764	27.003	10.7334	1.95243	4.84485	2.04577	27.841	-0.193966	0.940514
btr07	ENSDARG00000105558	100151764	13.0359	1.95153	3.90486	16.4725	8.18308	8.94888	0.827628	0.681482
btr09	ENSDARG00000054805	100170790	23.2785	15.6122	25.3816	63.952	8.18308	22.8694	0.565322	0.698483
btr12	ENSDARG00000051809	767681	43.7635	68.3034	65.4064	29.0691	9.20596	24.858	-1.48858	0.0609264
btr16	ENSDARG00000028850	767728	13.0359	10.7334	26.3578	14.5345	12.2746	14.9148	-0.263703	0.877185
btr18	ENSDARG00000103618	100144555	10.2425	14.6365	12.6908	19.3794	1.02288	4.9716	-0.561833	0.794731
btr20	ENSDARG00000102992	678596	1.86228	0	6.83351	4.84485	2.04577	0	-0.332521	1
btr21	ENSDARG00000058329	101885574	14.8982	18.5395	2.92865	7.75176	4.09154	10.9375	-0.674249	0.737793
btr22	ENSDARG00000100539	100144555	3.72456	20.491	12.6908	0	11.2517	28.8353	0.119753	0.965551
btr23	ENSDARG00000099509	100334710	13.0359	6.83034	3.90486	3.87588	11.2517	20.8807	0.595948	0.771994
btr24	ENSDARG00000105283	100536410	6.51797	4.87882	0	2.90691	0	0	-1.96277	1
btr25	ENSDARG00000102018	571141	24.2096	25.3699	28.3102	10.6587	5.11442	21.875	-1.04756	0.383564
btr26	ENSDARG00000105241	100149795	20.4851	15.6122	14.6432	23.2553	2.04577	12.9262	-0.406151	0.829451
btr29	ENSDARG00000099138	797384	14.8982	11.7092	3.90486	11.6276	8.18308	4.9716	-0.300639	0.890444
btr30	ENSDARG00000102591	393394	30.7276	15.6122	0	0	8.18308	0	-2.50376	0.684434
btr31	ENSDARG00000096304	555877	9.31139	8.78187	7.80972	12.5966	2.04577	7.95456	-0.194278	0.936103
btr33	ENSDARG00000008164	799840	30.7276	18.5395	19.5243	4.84485	0	29.8296	-0.988062	0.594694
bub1	ENSDARG00000077029	100307076	157.362	145.389	43.9297	52.3244	112.517	99.432	-0.39239	0.700803
bub1ba	ENSDARG00000078825	567931	95.9073	150.268	106.407	85.2694	129.906	104.404	-0.141925	0.875699
bub1bb	ENSDARG00000074927	567006	170.398	268.335	217.696	100.773	140.135	148.154	-0.754706	0.163304
bub3	ENSDARG00000075883	403012	502.815	922.097	598.42	478.671	722.156	666.195	-0.115993	0.882385
buc	ENSDARG00000096095	334375	28.8653	11.7092	13.667	31.007	0	5.96592	-0.550756	0.805923
buc2l	ENSDARG00000096628	100537720	27.9342	15.6122	6.83351	14.5345	19.4348	15.9091	-0.0168454	0.993145
bud23	ENSDARG00000063596	572367	95.9073	243.941	202.077	344.953	230.149	306.251	0.702201	0.261522
bud31	ENSDARG00000017084	445383	461.845	650.834	1058.22	774.207	731.362	558.808	-0.0724696	0.933699
bves	ENSDARG00000058548	415107	38.1767	32.2002	52.7156	97.866	197.417	105.398	1.70246	0.00364566
BX000363.1	ENSDARG00000088631	100535969	29.7964	27.3214	26.3578	19.3794	5.11442	2.98296	-1.5992	0.176927
BX000364.1	ENSDARG00000097977		8.38025	3.90305	12.6908	5.81382	1.02288	0	-1.86203	1
BX000364.3	ENSDARG00000115173		0	0	0	0	0	2.98296	2.49224	1
BX000438.1	ENSDARG00000097767		33.521	35.1275	56.6205	15.5035	9.20596	10.9375	-1.81107	0.0304831
BX000438.2	ENSDARG00000098011		62.3863	109.286	238.197	52.3244	8.18308	39.7728	-2.02914	0.0131336
BX000447.1	ENSDARG00000092245		1.86228	3.90305	6.83351	0	4.09154	18.8921	0.868666	1
BX000451.1	ENSDARG00000097896		9.31139	7.80611	7.80972	1.93794	9.20596	6.96024	-0.464689	0.840858
BX000460.1	ENSDARG00000117649		8.38025	0.975763	0	0	9.20596	5.96592	0.690374	1
BX000463.2	ENSDARG00000117817		8.38025	7.80611	0	0	1.02288	0.99432	-3.0133	1
BX000522.1	ENSDARG00000117580		12.1048	10.7334	5.85729	2.90691	0	4.9716	-1.8612	1
BX000524.2	ENSDARG00000105500		7.44911	0	3.90486	12.5966	2.04577	2.98296	0.633618	1
BX000534.1	ENSDARG00000095072	100537665	0	8.78187	8.78594	0	0	61.6479	1.81152	0.811718
BX000534.2	ENSDARG00000096618		15.8294	8.78187	3.90486	0	9.20596	2.98296	-1.23311	0.600556
BX000696.1	ENSDARG00000102124		4.65569	0.975763	0	0	0	3.97728	-0.50498	1
BX000701.1	ENSDARG00000099172	101882267	11.1737	11.7092	1.95243	6.78279	1.02288	10.9375	-0.405055	0.877185
BX000701.2	ENSDARG00000105074	101884528	16.7605	8.78187	8.78594	8.72073	6.13731	10.9375	-0.412984	0.832231
BX000981.2	ENSDARG00000093576		11.1737	3.90305	0	0	0	0	-4.78049	1
BX000981.3	ENSDARG00000093633		17.6916	18.5395	8.78594	11.6276	9.20596	5.96592	-0.748121	0.639723
BX000981.4	ENSDARG00000094304		2.79342	3.90305	1.95243	5.81382	0	10.9375	0.955365	1
BX000991.1	ENSDARG00000092282		7.44911	0.975763	0.976215	2.90691	0	0	-1.68649	1
BX001023.1	ENSDARG00000098673		5.58683	18.5395	8.78594	17.4415	33.7552	34.8012	1.3872	0.209777
BX001023.2	ENSDARG00000101163		31.6587	8.78187	38.0724	0	6.13731	0.99432	-3.47446	0.013729
BX001026.1	ENSDARG00000095883		9.31139	0.975763	10.7384	4.84485	0	5.96592	-0.957237	1
BX001030.1	ENSDARG00000093671		40.039	32.2002	39.0486	9.6897	39.8925	31.8183	-0.453065	0.716811
BX001050.1	ENSDARG00000092943		10.2425	7.80611	0.976215	0	0	3.97728	-2.25867	1
BX004769.1	ENSDARG00000097970		12.1048	13.6607	41.9773	30.0381	37.8467	17.8978	0.341458	0.819437
BX004774.2	ENSDARG00000093753		89.3893	82.9399	75.1686	49.4175	4.09154	17.8978	-1.79037	0.0454197
BX004780.1	ENSDARG00000096675		0.931139	3.90305	3.90486	0	4.09154	0	-1.10146	1
BX004785.1	ENSDARG00000089713		5.58683	8.78187	3.90486	2.90691	12.2746	9.9432	0.457656	0.84476
BX004785.2	ENSDARG00000093487		10.2425	13.6607	1.95243	20.3484	15.3433	13.9205	0.939832	0.553499
BX004816.1	ENSDARG00000040497	571124	12.1048	4.87882	9.76215	2.90691	13.2975	1.98864	-0.560724	0.814237
BX004816.2	ENSDARG00000087012		14.8982	13.6607	8.78594	1.93794	0	0	-4.24489	0.0263216
BX004823.1	ENSDARG00000098535	101887093	30.7276	44.8851	37.0962	78.4866	45.0069	45.7387	0.587614	0.505319
BX004840.2	ENSDARG00000095318		7.44911	0.975763	0	0	2.04577	7.95456	0.242032	1
BX004873.1	ENSDARG00000100864		81.0091	20.491	65.4064	35.8519	73.6477	0	-0.608401	0.863645
BX004962.1	ENSDARG00000094051		0	0	0	0	0	0	NA	1
BX004962.2	ENSDARG00000095141		2.79342	0	0	6.78279	1.02288	1.98864	1.80017	1
BX004970.1	ENSDARG00000117726		6.51797	0.975763	0.976215	0	0	0.99432	-2.98795	1
BX004981.1	ENSDARG00000092315	101884570	36.3144	15.6122	3.90486	25.1932	4.09154	22.8694	-0.0986161	0.964878
BX004981.2	ENSDARG00000092962		13.0359	13.6607	37.0962	0	9.20596	17.8978	-1.23609	0.473229
BX004991.1	ENSDARG00000096896		67.9731	58.5458	111.289	27.1312	51.1442	28.8353	-1.15169	0.108537
BX004999.1	ENSDARG00000096792	103910262	49.3504	59.5216	83.9545	13.5656	39.8925	36.7899	-1.09651	0.17929
BX005003.1	ENSDARG00000098435	564205	168.536	108.31	231.363	62.0141	52.1671	55.6819	-1.58076	0.00295728
BX005005.1	ENSDARG00000117551		23.2785	29.2729	15.6194	24.2242	13.2975	19.8864	-0.246855	0.869151
BX005005.2	ENSDARG00000117566		14.8982	6.83034	11.7146	22.2863	12.2746	10.9375	0.443963	0.796341
BX005011.1	ENSDARG00000117628		38.1767	15.6122	27.334	28.1001	2.04577	21.875	-0.63948	0.686462
BX005012.1	ENSDARG00000087679		10.2425	0	3.90486	0	0	0.99432	-3.72716	1
[truncated: 23,700 more rows]
