# Supplementary material for: An improved zebrafish transcriptome annotation for sensitive and comprehensive detection of cell type-specific genes
Source: eLife. 2020 Aug 24;9:e55792. doi: 10.7554/eLife.55792 (PMC7486121; doi:10.7554/eLife.55792)
Supplement: Figure 1—figure supplement 1—source data 2. — Gene symbol, along with matching Ensembl gene ID and NCBI ID, as well as differential annotation (i.e., identified as differentially expressed only in RefSeq, Ens95, or both) are indicated. Expression data are derived from Figure 1—source data 1. Data used to generate plots in Figure 1—figure supplement 1B,F–H. [file elife-55792-fig1-figsupp1-data2.xlsx]

## Sheet: title
	Figure 1 - source data 4
	Intersection of pdgfrb-pos-enriched genes from RefSeq and Ens95 commonly annotated by NCBI ID.

## Sheet: pdgfrbpos RefSeqEns inter
ID	Ens95ensdarg	NCBI gene ID	EnsRefPdgfrbClass	Ens95 pdgfrb01	Ens95 pdgfrb06	Ens95 pdgfrb09	Ens95 log2 Fold Change	Ens95 padj	Ens95 -log10 padj	RefSeq pdgfrb01	RefSeq pdgfrb06	RefSeq pdgfrb09	RefSeq log2 Fold Change	RefSeq padj	RefSeq -log10 padj
aasdhppt	ENSDARG00000037501	619247	Both	130.811	190.257	204.83	1.04912	0.041884	1.37795	129.185	191.133	203.95	1.06768	0.0416848	1.38002
abca1a	ENSDARG00000074635	558924	Both	7088.98	5788.5	4706.12	1.22664	0.000836523	3.07752	6993.35	5821.89	4684.92	1.23355	0.000647822	3.18854		pdgfrb-pos enriched in
abca1b	ENSDARG00000079009	100136868	Both	1107.53	1492.39	1298.58	1.41125	0.00178527	2.7483	1018.06	1447.3	1242.51	1.44172	0.00158599	2.7997		both	1909
abcc9	ENSDARG00000015985	561160	Both	325.574	180.028	298.296	3.26134	6.40763e-09	8.1933	887.907	463.012	778.18	3.83355	3.52158e-14	13.4533		Ens95 only	172
abhd17b	ENSDARG00000035571	437017	Ens95only	624.017	634.188	433.524	1.05052	0.0107031	1.97049	21.2095	21.4641	17.8209	0.523731	0.765398	0.116113		RefSeq only	255
abhd4	ENSDARG00000102887	550276	Both	820.718	567.701	339.063	1.47283	0.00182242	2.73935	820.422	576.466	343.548	1.47679	0.00167143	2.77691
abi3bpa	ENSDARG00000062156	101884149	RefSeqOnly	433.13	109.449	329.12	1.30125	0.0777087	1.10953	500.351	191.133	408.891	1.34202	0.0380872	1.41922
abi3bpb	ENSDARG00000071095	100149890	Both	4345.83	10369	7917.77	1.27099	0.00859746	2.06563	4303.6	10435.7	7890.7	1.2817	0.00782847	2.10632
ablim1b	ENSDARG00000045064	541550	Both	4062.89	5873.4	3879.84	1.45268	0.00025905	3.58662	4156.1	6055.96	3977.03	1.34786	0.000731417	3.13584
abr	ENSDARG00000095180	565190	RefSeqOnly	45.5416	27.6179	14.9148	0.684976	0.588435	0.230302	836.811	534.559	531.657	1.0649	0.011859	1.92595
abtb2a	ENSDARG00000059751	559451	Ens95only	218.018	352.895	319.177	2.00214	1.12321e-05	4.94954	50.1315	30.6631	52.4727	1.03215	0.262053	0.581612
abtb2b	ENSDARG00000062000	100007078	Both	402.123	703.745	355.967	1.85096	4.87565e-05	4.31197	402.98	700.14	350.478	1.83449	5.92678e-05	4.22718
acacb	ENSDARG00000061994	556236	Both	270.343	505.305	394.745	1.11529	0.0192748	1.71501	625.68	1163.15	700.956	1.14013	0.00892835	2.04923
acadm	ENSDARG00000038900	406283	Both	1961.2	2361.84	1834.52	1.01673	0.010457	1.98059	1935.85	2373.32	1825.65	1.03011	0.0091631	2.03796
acana	ENSDARG00000035891	497505	Both	4523.15	2581.76	3228.56	4.65876	1.31836e-22	21.88	7397.29	3713.3	3821.59	4.68078	1.45865e-19	18.836
acanb	ENSDARG00000045799	559593	Both	291.66	87.9681	198.864	3.20072	9.19631e-06	5.03639	645.926	365.913	659.374	4.37623	1.1507e-14	13.939
acap2	ENSDARG00000060783	100124613	RefSeqOnly	118.214	97.174	90.4831	0.691562	0.301353	0.520925	110.868	100.166	80.1941	1.24571	0.0451727	1.34512
ace	ENSDARG00000079166	565980	Both	384.681	573.838	531.961	1.57038	0.000340931	3.46733	379.843	576.466	529.677	1.58125	0.000331383	3.47967
ackr3b	ENSDARG00000058179	561050	Both	3703.4	7040.51	4260.66	2.0384	1.42836e-06	5.84516	3663.46	7078.06	4245.34	2.04915	1.23138e-06	5.90961
ackr4b	ENSDARG00000040133	641390	Both	202.515	158.547	235.654	1.66153	0.00045944	3.33777	211.131	163.536	262.363	1.61798	0.000724783	3.13979
acot14	ENSDARG00000089159	557184	Both	238.367	546.22	243.608	1.30942	0.0133019	1.87609	235.233	548.869	242.562	1.32322	0.0132269	1.87854
acot15	ENSDARG00000045522	557032	Both	664.713	803.987	386.791	1.81269	6.20993e-05	4.20691	656.53	808.483	393.05	1.80788	5.73969e-05	4.24111
acox3	ENSDARG00000038865	406421	Both	161.818	180.028	64.6308	1.41952	0.0226294	1.64533	167.748	229.973	69.3035	1.40287	0.0282805	1.54851
acsf2	ENSDARG00000061201	751707	Both	405.029	1316.45	919.746	1.55102	0.00333249	2.47723	403.945	1317.49	913.817	1.56851	0.00293746	2.53203
acsl4b	ENSDARG00000010752	334561	RefSeqOnly	653.086	903.207	647.303	0.978664	0.0253289	1.59638	521.561	842.212	575.219	1.18435	0.0169387	1.77112
acsm3	ENSDARG00000004880	100002035	Both	367.24	765.118	346.023	2.02475	3.18841e-05	4.49643	362.49	769.643	344.538	2.0335	3.49917e-05	4.45604
acta2	ENSDARG00000045180	322509	Both	4430.13	4056.76	4730.98	4.13664	5.30161e-26	25.2756	4348.91	4062.86	4693.83	4.1688	8.73944e-26	25.0585
actb1	ENSDARG00000037746	57934	Both	47549.3	90464.9	57682.5	1.30749	0.00383415	2.41633	46861.4	90851.6	57409.1	1.31717	0.00342953	2.46477
actb2	ENSDARG00000037870	57935	Both	179175	176795	130548	1.32873	0.000408801	3.38849	176812	177170	129598	1.33353	0.000347217	3.4594
actn1	ENSDARG00000007219	560400	Both	2388.51	3215.95	2544.47	1.77925	3.04531e-05	4.51637	2335.94	3041.78	2418.69	1.76105	3.97774e-05	4.40036
acvrl1	ENSDARG00000018179	266753	Both	993.194	1243.83	758.666	1.94834	5.73108e-06	5.24176	982.385	1253.1	755.409	1.95116	5.64572e-06	5.24828
adam12	ENSDARG00000079068	563275	Both	245.149	308.911	218.75	1.0055	0.0434988	1.36152	275.723	335.25	233.652	1.0097	0.0350838	1.45489
adam8a	ENSDARG00000001452	368917	Both	1859.45	1417.72	1104.69	3.25107	6.00133e-10	9.22175	1833.66	1425.83	1099.95	3.26863	3.23675e-10	9.48989
adamts1	ENSDARG00000103519	565145	RefSeqOnly	19.3794	149.341	65.6251	1.77084	0.0588632	1.23016	1525.16	3639.71	1704.87	2.40949	3.21642e-06	5.49263
adamts10	ENSDARG00000075188	564734	RefSeqOnly	52.3244	16.3662	47.7274	0.88338	0.400104	0.397827	1058.55	2149.48	1241.52	2.55346	7.04373e-09	8.1522
adamts12	ENSDARG00000067549	100003937	Both	792.617	1211.1	778.553	2.61131	1.53694e-10	9.81334	165.82	171.713	154.448	2.00821	3.02764e-05	4.5189
adamts15a	ENSDARG00000029124	569571	Both	288.753	301.751	153.125	1.07009	0.0431983	1.36453	285.364	303.564	152.468	1.07728	0.0428948	1.36759
adamts17	ENSDARG00000075555	101884120	RefSeqOnly	22.2863	18.4119	27.841	0.320716	0.819578	0.0864099	508.064	859.588	759.369	1.78798	4.77712e-05	4.32083
adamts2	ENSDARG00000075930	571682	Both	193.794	507.351	295.313	1.29952	0.0248336	1.60496	191.85	498.786	282.164	1.34591	0.0186004	1.73048
adamts3	ENSDARG00000060127	102467218	Both	158.911	75.6935	92.4718	2.02117	0.00120645	2.91849	286.328	132.873	147.518	2.04541	0.000944481	3.02481
adamts9	ENSDARG00000077778	100333407	Both	752.89	1263.26	988.354	1.63387	4.05764e-05	4.39173	137.862	62.3482	96.0349	1.46785	0.033061	1.48068
adamtsl3	ENSDARG00000027903	100534944	Both	253.87	291.522	310.228	1.30552	0.00841879	2.07475	204.382	234.061	268.304	1.3139	0.0133774	1.87363
adamtsl7	ENSDARG00000055439	556634	Both	114.338	56.2586	84.5172	1.41017	0.0343964	1.46349	98.3349	57.2377	72.2737	1.45757	0.0372153	1.42928
adcy7	ENSDARG00000060070	568726	RefSeqOnly	706.379	857.177	654.263	0.995305	0.0105401	1.97716	73.2692	188.067	173.259	1.26124	0.0402414	1.39533
adcy9	ENSDARG00000100869	100333702	RefSeqOnly	38.7588	30.6865	49.716	-0.0329026	0.980327	0.00862889	595.794	1067.07	806.891	1.58224	9.99546e-05	4.0002
add1	ENSDARG00000103962	555511	Ens95only	259.684	559.518	414.632	1.08315	0.0411552	1.38558	1596.5	2513.35	1845.45	0.998831	0.012978	1.88679
add3a	ENSDARG00000040874	556762	Both	3677.24	3995.39	3372.73	1.44329	0.000161206	3.79262	6170.04	7046.37	6227.42	1.46213	0.000100313	3.99864
add3b	ENSDARG00000056250	553243	Both	324.605	173.89	200.853	1.81726	0.0028019	2.55255	321.035	176.824	201.97	1.80809	0.00291612	2.5352
adgre5b.3	ENSDARG00000112943	100536657	RefSeqOnly	88.1763	133.998	114.347	0.332875	0.678078	0.16872	289.22	444.614	416.811	1.10957	0.038713	1.41214
adgrg6	ENSDARG00000054137	561970	Both	1078.46	2452.88	1411.93	1.74705	0.000146313	3.83472	212.095	1211.19	650.463	1.54508	0.0216166	1.66521
adgrl2a	ENSDARG00000069356	57987	Both	2954.39	4152.91	2933.24	1.0012	0.00825314	2.08338	2934.62	4189.6	2921.64	1.00246	0.00779944	2.10794
adgrl4	ENSDARG00000013653	406676	Both	106.587	99.2198	43.7501	1.57367	0.0332113	1.47871	101.227	99.1439	43.5622	1.67532	0.0319365	1.49571
adh8b	ENSDARG00000024278	402841	Both	397.278	488.939	453.41	1.24529	0.0148572	1.82806	390.448	487.543	445.523	1.25393	0.0149009	1.82679
adhfe1	ENSDARG00000053518	404618	Both	142.439	252.652	206.819	1.27059	0.0122509	1.91183	140.754	254.503	205.931	1.28092	0.0129841	1.88659
adipor2	ENSDARG00000101849	560140	Both	5358.4	3429.73	3416.48	1.32307	0.00112864	2.94744	2228.93	1570.97	1601.9	1.35427	0.000584363	3.23332
adma	ENSDARG00000015263	556502	Both	762.579	878.658	465.342	2.88109	2.66644e-09	8.57407	778.003	886.163	466.314	2.86929	5.5293e-09	8.25733
admb	ENSDARG00000069027	570100	Both	1086.22	1592.63	588.638	2.86875	1.80744e-08	7.74294	1113.5	1652.74	599.971	2.89847	1.64913e-08	7.78274
adob	ENSDARG00000053571	406474	Both	258.715	306.865	296.307	1.0194	0.0225115	1.6476	255.478	308.675	295.035	1.02659	0.0224386	1.649
adora2aa	ENSDARG00000033706	561701	Both	525.182	258.79	337.075	2.56399	7.64745e-08	7.11648	392.376	201.354	250.483	3.16676	1.44893e-09	8.83895
adprh	ENSDARG00000040712	445059	Both	239.336	283.339	196.875	1.71189	0.00040739	3.38999	236.197	284.144	196.03	1.72625	0.000488733	3.31093
adra1d	ENSDARG00000024101	568614	Both	720.914	582.021	508.098	2.1203	9.33467e-07	6.0299	689.309	556.024	461.364	2.15283	6.08211e-07	6.21595
adra2da	ENSDARG00000091277	266754	Both	65.89	148.318	99.432	1.43271	0.0203327	1.69181	65.5566	149.227	99.005	1.45268	0.0214775	1.66802
adrb3a	ENSDARG00000053646	558248	Both	578.475	650.555	689.064	1.5706	0.000145414	3.83739	569.764	651.079	686.105	1.58412	0.000140101	3.85356
aebp1	ENSDARG00000091726	793308	Ens95only	602.699	840.811	862.076	1.47226	0.0022339	2.65094	61.7004	35.7736	51.4826	0.592003	0.613588	0.212123
aep1	ENSDARG00000039099	503710	Both	218.018	344.712	317.188	2.8299	2.25077e-07	6.64767	215.951	346.493	316.816	2.82423	3.21788e-07	6.49243
afap1	ENSDARG00000055284	568356	RefSeqOnly	112.401	226.057	92.4718	0.74295	0.328775	0.483101	747.153	1793.79	884.115	1.37967	0.00922635	2.03497
afap1l1a	ENSDARG00000089162	566757	Both	484.485	747.729	484.234	1.84871	4.59035e-05	4.33815	478.178	752.267	482.155	1.85046	4.63722e-05	4.33374
afap1l1b	ENSDARG00000056453	768144	Both	196.701	240.378	129.262	1.32259	0.0115948	1.93574	194.742	249.393	132.667	1.35106	0.0101928	1.99171
afap1l2	ENSDARG00000074806	567369	Both	1470.9	1168.13	1042.05	2.46624	3.39567e-11	10.4691	1449.96	1165.2	1014.8	2.50819	1.24445e-11	10.905
aff3	ENSDARG00000079575	570215	Both	638.551	563.609	717.899	2.4869	2.81462e-09	8.55058	638.213	568.289	713.826	2.48616	2.84545e-09	8.54585
ago3b	ENSDARG00000063079	568159	RefSeqOnly	127.904	169.799	107.387	0.715157	0.409689	0.387546	434.795	854.477	431.662	1.21265	0.043342	1.36309
agtr1a	ENSDARG00000018616	794575	RefSeqOnly	8.72073	39.8925	23.8637	1.61349	0.250653	0.600926	34.7065	100.166	50.4926	2.79936	0.00488923	2.31076
agtr2	ENSDARG00000035552	503772	Both	1789.69	1933.25	1646.59	2.58288	1.11476e-09	8.95282	1766.17	1943.02	1639.52	2.5923	1.03541e-09	8.98489
ahcyl1	ENSDARG00000056331	798918	Both	2228.63	2400.71	2698.59	1.61404	0.000290835	3.53635	2199.04	2412.16	2687	1.6201	0.000267868	3.57208
ahnak	ENSDARG00000061764	559276	Both	9422.26	18629.8	12147.6	1.55221	0.000235871	3.62733	9304.22	18725.9	12095.4	1.56191	0.000210362	3.67703
ahr2	ENSDARG00000021833	30517	Both	2299.37	3740.69	3080.4	1.23566	0.00156965	2.8042	2262.67	3743.96	3059.26	1.24689	0.00138423	2.85879
ahsa1a	ENSDARG00000028664	565968	Both	1056.18	206.623	457.387	2.29814	0.0010847	2.96469	1034.45	208.509	455.423	2.30779	0.00102693	2.98846
aifm2	ENSDARG00000077549	557507	Both	548.437	789.667	773.581	1.15053	0.00888556	2.05132	541.806	783.952	765.309	1.16201	0.00795741	2.09923
aip	ENSDARG00000104437	334795	Both	1228.65	2064.18	1678.41	1.03566	0.0102244	1.99036	1146.28	2048.29	1639.52	1.03094	0.0123117	1.90968
ak1	ENSDARG00000001950	445486	Both	2218.94	1671.39	1271.74	1.58885	0.000936614	3.02844	2386.07	1790.72	1356.37	1.58632	0.00089888	3.0463
ak4	ENSDARG00000006546	406590	Both	351.736	480.756	484.234	1.07404	0.0159944	1.79603	355.741	464.034	483.145	1.12171	0.0102815	1.98794
akap12b	ENSDARG00000055678	567365	Both	7482.39	14765.3	8503.43	2.0544	8.96069e-07	6.04766	7336.56	14756.1	8422.36	2.07719	7.02591e-07	6.1533
akt2l	ENSDARG00000103612	403146	Both	427.316	541.106	276.421	1.11048	0.0394135	1.40436	422.262	544.781	275.234	1.11109	0.0395467	1.40289
aktip	ENSDARG00000026862	378716	Both	633.706	1599.79	955.542	1.25648	0.00857434	2.0668	625.68	1607.77	951.439	1.26759	0.00810031	2.0915
AL732488.1	ENSDARG00000096717	110438942	Both	297.474	1429.99	806.394	1.78352	0.00503326	2.29815	1448.99	3209.4	1837.53	1.82381	0.000116691	3.93296
AL929058.1	ENSDARG00000092980	110438186	Both	322.667	449.046	342.046	2.30956	1.32966e-07	6.87626	340.316	612.239	414.831	2.42291	4.48159e-08	7.34857
AL954322.2	ENSDARG00000097072	101882098	Both	209.298	252.652	267.472	1.39017	0.00146585	2.83391	203.418	248.371	250.483	1.38077	0.00174185	2.75899
alcama	ENSDARG00000026531	30194	Both	4486.33	5278.08	5203.28	1.47029	2.64857e-05	4.57699	4844.44	5742.17	5549.23	1.43175	3.4024e-05	4.46821
aldh1a2	ENSDARG00000053493	116713	Both	1776.12	5619.73	2728.41	1.37856	0.0220519	1.65655	1557.93	5035.9	2401.86	1.37556	0.0240474	1.61893
aldh2.1	ENSDARG00000089924	393462	Both	1428.26	2257.51	1454.69	1.11311	0.00543668	2.26467	1398.86	2262.93	1435.57	1.12855	0.00477869	2.32069
aldh9a1a.1	ENSDARG00000069100	100005587	Both	5027.02	4695.04	4476.43	1.37906	0.000975695	3.01069	4961.09	4718.02	4453.25	1.38576	0.000859937	3.06553
aldh9a1b	ENSDARG00000037061	399481	Both	271.312	474.618	306.251	1.55408	0.000452822	3.34407	256.442	474.255	300.975	1.56368	0.000577723	3.23828
aldob	ENSDARG00000053684	321664	Both	12396	5177.84	6076.29	1.55406	0.00707249	2.15043	12221.5	5180.01	6035.35	1.58008	0.00646023	2.18975
alg5	ENSDARG00000021938	445564	RefSeqOnly	1186.99	1229.51	1120.6	0.696559	0.0945281	1.02444	438.651	543.758	474.234	1.08893	0.0111797	1.95157
alkal1	ENSDARG00000074387	100535009	Ens95only	351.736	97.174	144.176	2.2749	0.00133899	2.87322	101.227	16.3536	29.7015	1.45245	0.194345	0.711427
alkbh3	ENSDARG00000045606	792266	Ens95only	1958.29	1950.64	1399.01	2.56516	1.42838e-12	11.8452	135.934	180.912	148.508	0.290806	0.685233	0.164162
alpl	ENSDARG00000015546	393982	RefSeqOnly	133.718	126.838	67.6138	1.08607	0.0775711	1.1103	772.219	1189.73	847.483	1.67994	2.32144e-05	4.63424
alx1	ENSDARG00000062824	565176	Both	86.2383	165.707	61.6479	2.17826	0.000716048	3.14506	85.8021	166.603	61.3831	2.19449	0.000876996	3.057
alx4a	ENSDARG00000088332	100006399	Both	1468.96	1470.91	1388.07	1.62219	0.000141338	3.84974	1277.39	1102.85	1130.64	1.73894	6.60015e-05	4.18045
alx4b	ENSDARG00000074442	497424	Both	121.121	149.341	42.7558	1.95936	0.00771919	2.11243	116.652	117.542	31.6816	2.13275	0.00712937	2.14695
amotl2a	ENSDARG00000061923	558920	Ens95only	3608.44	6347	4516.2	1.93989	6.00768e-07	6.22129	58.8082	140.028	82.1742	1.05097	0.234147	0.630511
amotl2b	ENSDARG00000061948	559784	Both	1918.56	3070.7	1776.85	1.95858	6.68587e-05	4.17484	1902.11	3094.93	1773.18	1.96792	5.96517e-05	4.22438
ampd2a	ENSDARG00000104491	100330772	RefSeqOnly	77.5176	34.7781	85.5115	0.767519	0.35331	0.451844	2194.22	1645.58	1548.44	1.09175	0.0124879	1.90351
and1	ENSDARG00000088514	794315	Both	2198.59	2412.98	2864.64	2.84928	1.30384e-10	9.88477	2129.63	2407.05	2836.49	2.91065	1.31763e-10	9.88021
and2	ENSDARG00000079302	566702	Both	13244.9	13803.8	13206.6	4.35793	1.29939e-13	12.8863	11926.5	12892.8	12557.8	4.36101	1.32266e-13	12.8786
angpt1	ENSDARG00000030364	114407	Ens95only	143.408	141.158	205.824	1.33152	0.0134136	1.87245	30.8502	38.8399	61.3831	1.25609	0.256522	0.590875
angpt2b	ENSDARG00000053906	114408	Both	124.028	230.149	130.256	3.24886	4.50921e-08	7.3459	124.365	238.15	133.657	3.36208	1.74314e-08	7.75867
angpt4	ENSDARG00000076787	571050	Ens95only	103.68	69.5561	56.6763	1.77645	0.0131336	1.88162	61.7004	65.4145	31.6816	1.53548	0.0643208	1.19165
angptl1a	ENSDARG00000012071	544656	Both	3293.53	3264.02	3209.67	2.35064	1.57834e-08	7.8018	2399.57	2252.71	2488.99	2.44871	2.92721e-08	7.53355
angptl1b	ENSDARG00000100159	334311	Both	127.904	56.2586	151.137	2.41105	0.000262239	3.5813	142.682	60.304	150.488	2.57292	0.000125261	3.90218
angptl2a	ENSDARG00000024030	569092	Ens95only	286.815	335.506	282.387	1.54242	0.000919252	3.03657	41.4549	33.7294	61.3831	0.672388	0.490749	0.30914
angptl3	ENSDARG00000044365	114421	Both	231.584	338.575	530.967	3.85549	6.92912e-13	12.1593	348.029	392.487	636.602	3.58576	4.13144e-12	11.3839
angptl4	ENSDARG00000035859	492647	Both	18308.7	25806.4	13614.2	2.27051	0.000125947	3.89981	18070.5	25938.9	13555.8	2.28029	0.000111723	3.95186
angptl5	ENSDARG00000056630	566212	Both	433.13	1521.03	773.581	2.05105	0.000151788	3.81876	509.028	1674.2	871.244	2.08554	6.47769e-05	4.18858
angptl6	ENSDARG00000020265	561927	Both	180.228	59.3273	190.91	2.43823	0.000574586	3.24064	181.245	60.304	190.09	2.40306	0.000833828	3.07892
angptl7	ENSDARG00000027582	450053	Both	1872.05	7270.66	3475.15	1.3092	0.0223647	1.65044	1838.48	7305.99	3455.28	1.32282	0.0210643	1.67645
ankef1b	ENSDARG00000060211	100149106	Both	93.9901	52.1671	61.6479	1.69321	0.0111009	1.95464	85.8021	53.1493	58.413	1.68416	0.0175203	1.75646
ano1	ENSDARG00000102335	407698	Both	54.2623	68.5333	53.6933	1.89523	0.0334747	1.47528	660.387	626.549	367.309	1.79645	0.000354135	3.45083
ano10a	ENSDARG00000057736	566425	Both	627.893	1123.13	1033.1	1.04474	0.0340706	1.46762	619.896	1129.42	1028.66	1.05332	0.0324878	1.48828
ano10b	ENSDARG00000018159	565195	Both	403.092	910.367	452.416	1.35014	0.00548256	2.26102	395.268	914.782	450.473	1.3536	0.00566761	2.2466
ano5b	ENSDARG00000036147	560102	Both	1061.02	1153.81	1248.87	1.72774	5.79242e-06	5.23714	1023.84	1138.62	1237.56	1.73333	5.55367e-06	5.25542
anos1b	ENSDARG00000004932	30652	Both	363.364	872.52	639.348	1.3193	0.00653461	2.18478	358.633	876.964	636.602	1.31966	0.00677788	2.16891
antxr1a	ENSDARG00000025672	793153	RefSeqOnly	37.7898	34.7781	26.8466	1.14334	0.223705	0.650325	119.544	99.1439	53.4627	1.487	0.0243145	1.61413
antxr1c	ENSDARG00000063612	563907	Ens95only	3835.18	3954.47	3611.37	2.52164	3.47869e-11	10.4586	122.437	71.5472	122.766	1.40285	0.126259	0.898736
antxr2a	ENSDARG00000104118	557239	Both	722.852	1182.45	622.445	2.2582	1.04072e-07	6.98267	4288.17	6906.35	3902.78	2.06076	1.55427e-06	5.80847
anxa11a	ENSDARG00000077383	368215	Both	2047.43	3001.14	2372.45	1.23776	0.00849123	2.07103	2017.79	3014.18	2344.44	1.24594	0.00808751	2.09219
anxa11b	ENSDARG00000002632	353365	Both	2415.64	4885.3	3606.4	1.51611	0.00018578	3.731	2360.04	4897.91	3576.06	1.52636	0.000178164	3.74918
anxa13	ENSDARG00000013976	81880	Both	2398.2	3185.26	2153.7	1.95364	1.38051e-07	6.85996	1801.84	2622.71	1680.12	1.88866	7.58956e-07	6.11978
anxa1a	ENSDARG00000026726	334724	Both	2129.8	2257.51	2254.12	1.13698	0.010716	1.96997	2095.88	2252.71	2240.48	1.14467	0.00984919	2.0066
anxa3b	ENSDARG00000044254	492336	Both	726.727	1402.37	1050	1.38807	0.000864552	3.06321	713.41	1404.37	1045.49	1.40471	0.000773345	3.11163
anxa4	ENSDARG00000036456	353362	Both	2032.9	2892.72	2209.38	1.18957	0.0088583	2.05265	2006.23	2907.88	2200.88	1.19795	0.00819567	2.08642
aoc2	ENSDARG00000014646	541429	Both	8577.32	9269.38	11251.7	2.53488	5.53522e-09	8.25687	8449.09	9256.16	11144	2.54067	4.84926e-09	8.31432
aox6	ENSDARG00000020054	570457	Both	172.477	292.545	228.694	1.09535	0.0479013	1.31965	411.657	566.245	347.508	1.18999	0.00715182	2.14558
ap3m1	ENSDARG00000029928	266798	Both	235.46	459.275	336.08	1.21152	0.0124385	1.90523	232.34	460.968	334.637	1.21901	0.0128018	1.89273
apln	ENSDARG00000053279	798375	Both	4298.35	4709.36	4008.11	1.27414	0.000240306	3.61923	4228.4	4729.27	3988.91	1.29446	0.000168565	3.77323
aplnra	ENSDARG00000002172	561935	Both	880.794	1184.5	887.928	1.23615	0.00246218	2.60868	803.069	1012.9	732.637	1.27891	0.0018798	2.72589
apof	ENSDARG00000090980	793418	Both	5577.39	5237.17	3620.32	3.81088	4.60329e-11	10.3369	5500.01	5262.8	3605.76	3.81605	4.2659e-11	10.37
apol1	ENSDARG00000007425	560340	Both	199.608	313.003	297.302	1.35353	0.00417751	2.37908	248.73	330.139	318.796	1.38388	0.00199014	2.70112
aqp11	ENSDARG00000100555	553476	Both	556.189	695.561	398.722	1.32615	0.00174163	2.75904	549.519	699.118	397.01	1.33413	0.00166717	2.77802
aqp3a	ENSDARG00000003808	406777	Both	7273.09	10624.7	8552.15	2.14884	2.45736e-05	4.60953	7178.45	10678.9	8515.42	2.15549	2.23992e-05	4.64977
arap3	ENSDARG00000076801	558931	Both	361.426	628.051	397.728	1.67333	0.000157619	3.80239	356.705	622.46	390.08	1.78358	0.000103865	3.98353
arcn1b	ENSDARG00000031214	399661	Both	691.845	1552.74	1194.18	1.07384	0.0207238	1.68353	683.524	1560.75	1189.05	1.08405	0.0196562	1.7065
arhgap17b	ENSDARG00000062263	100141341	Both	281.001	360.055	220.739	2.08354	2.29375e-05	4.63945	448.292	723.648	425.722	1.63708	0.000463753	3.33371
arhgap29a	ENSDARG00000026329	564805	Both	275.187	541.106	423.58	1.92059	2.63016e-05	4.58002	451.184	713.427	525.717	1.96765	1.08745e-06	5.96359
arhgap42a	ENSDARG00000056619	566275	Both	1338.15	1711.29	1309.52	2.15616	1.90605e-09	8.71987	1320.77	1719.18	1303.9	2.16341	1.55949e-09	8.80702
ARHGEF17	ENSDARG00000101644	100002227	Ens95only	1699.57	1460.68	920.741	1.64553	4.36303e-05	4.36021	64.5926	88.9229	78.214	0.650996	0.430819	0.365705
arhgef1a	ENSDARG00000040380	368266	Both	404.06	749.774	367.899	1.11535	0.024945	1.60302	419.37	766.577	381.169	1.09553	0.026028	1.58456
arhgef1b	ENSDARG00000055837	557983	Both	4075.49	6789.91	4262.65	1.81037	2.73156e-06	5.56359	4032.7	6838.89	4256.23	1.81255	2.52278e-06	5.59812
arl4ab	ENSDARG00000033182	338267	Both	572.661	445.978	495.172	1.45224	0.000930808	3.03114	565.908	448.703	493.045	1.46027	0.000851013	3.07006
arl4ca	ENSDARG00000057606	550444	Both	126.935	195.371	137.216	1.29531	0.0129878	1.88646	121.473	187.045	130.687	1.38007	0.00860312	2.06534
arl5c	ENSDARG00000035719	393819	Both	2023.21	1746.06	1361.22	1.51467	0.00491671	2.30833	1994.66	1739.62	1346.47	1.5236	0.00424793	2.37182
arl6ip5b	ENSDARG00000016238	436790	Both	1001.91	1021.86	795.456	1.08494	0.00645532	2.19008	985.278	1027.21	786.1	1.09221	0.0059385	2.22632
arnt	ENSDARG00000021855	493634	Ens95only	189.918	170.822	158.097	1.05247	0.0394135	1.40436	1601.32	364.891	648.483	1.14568	0.081083	1.09107
arpc1b	ENSDARG00000027063	335474	Both	966.063	1958.82	1278.7	1.23354	0.00701323	2.15408	885.979	1854.09	1204.89	1.27314	0.00549599	2.25995
arrdc2	ENSDARG00000020761	335206	Both	3059.04	3035.92	2744.32	1.63836	0.000175279	3.75627	3019.46	3050.98	2732.54	1.64304	0.000160211	3.79531
arrdc3a	ENSDARG00000052690	566685	Both	4365.21	4318.62	2467.9	1.60898	0.000107991	3.96661	4308.42	4338.82	2455.33	1.61975	8.78632e-05	4.05619
arsia	ENSDARG00000077606	100329483	Both	580.413	271.064	374.859	2.83179	1.23269e-08	7.90915	390.448	219.752	266.324	2.65894	2.35148e-07	6.62866
arsj	ENSDARG00000077590	559800	Both	461.23	484.847	325.143	1.9647	4.48212e-05	4.34852	448.292	485.499	313.846	1.98644	3.70427e-05	4.4313
asah1a	ENSDARG00000037091	450068	Both	281.97	273.11	227.699	1.15979	0.0101404	1.99394	248.73	223.84	176.229	1.08371	0.0349524	1.45652
asap3	ENSDARG00000021896	664764	Both	2648.2	3667.04	2337.65	1.54497	0.000648729	3.18794	1213.76	880.03	937.578	1.56226	0.0243246	1.61395
asip1	ENSDARG00000077858	798574	Both	257.746	262.881	218.75	2.13233	6.17598e-06	5.20929	815.602	1307.27	824.712	1.91737	1.47874e-05	4.83011
asip2b	ENSDARG00000114760	796595	Both	4064.83	4860.75	3294.18	1.67302	0.000230367	3.63758	205.347	171.713	133.657	1.48236	0.00526428	2.27866
asph	ENSDARG00000055945	323659	Ens95only	557.158	1706.17	1523.3	1.12214	0.0448804	1.34794	566.872	1740.64	1523.69	1.05548	0.056563	1.24747
atf4b	ENSDARG00000038141	556410	Both	22599.3	38708	23253.2	1.66892	0.000570416	3.24381	22305.6	38907.3	23154.3	1.67803	0.000508248	3.29392
atf5b	ENSDARG00000077785	567253	Both	925.366	1417.72	976.423	1.58907	0.000142267	3.84689	877.302	1398.24	962.329	1.67553	5.41508e-05	4.26639
atl3	ENSDARG00000004270	449995	Both	1489.31	1929.16	1683.38	1.09915	0.0078417	2.10559	1257.14	1744.73	1508.84	1.11861	0.00753434	2.12295
atoh8	ENSDARG00000037555	561606	Both	1038.74	1816.64	1082.81	1.5636	0.000179224	3.7466	1025.77	1819.34	1078.16	1.5686	0.000173333	3.76112
atp10a	ENSDARG00000061039	567172	Both	345.922	277.202	290.342	1.12658	0.0228817	1.64051	1092.29	1219.37	1197.96	1.43118	0.00017758	3.7506
ATP11B	ENSDARG00000101094	100329583	Both	924.397	1469.88	1107.67	1.0065	0.0131965	1.87954	859.949	1454.45	1057.37	1.13544	0.00658684	2.18132
atp1a1a.1	ENSDARG00000002791	64612	Both	9857.33	17289.8	11815.5	1.70012	1.13898e-05	4.94348	9690.81	17321.6	11705.4	1.71014	1.01273e-05	4.99451
atp1b1a	ENSDARG00000013144	64267	Both	7051.19	8474.6	9058.26	1.24329	0.00128364	2.89156	6959.61	8516.16	9008.47	1.2493	0.00111134	2.95415
atp8b5a	ENSDARG00000062040	100330945	RefSeqOnly	84.3004	115.586	141.193	1.13033	0.100613	0.997346	138.826	196.244	176.229	1.30427	0.0327194	1.48519
avpr1ab	ENSDARG00000045788	555939	Both	635.644	764.095	1069.89	3.07952	3.60045e-12	11.4436	48.2034	91.9892	133.657	2.37491	0.00425772	2.37082
avpr2aa	ENSDARG00000007436	100007585	RefSeqOnly	19.3794	15.3433	11.9318	1.52743	0.298671	0.524807	246.801	251.437	230.682	1.99485	3.49162e-06	5.45697
axin2	ENSDARG00000100149	58080	RefSeqOnly	2107.51	3251.75	2498.73	0.977593	0.0214545	1.66848	1070.12	1891.91	1548.44	1.03084	0.0133222	1.87542
b2m	ENSDARG00000053136	30400	Both	146.314	433.703	293.324	1.47558	0.0113735	1.9441	144.61	435.416	292.065	1.48696	0.0116234	1.93467
b2ml	ENSDARG00000015887	791742	Both	7713	6565.9	5942.06	1.36027	0.00158275	2.80059	7612.28	6599.71	5916.54	1.36526	0.00137181	2.86271
b3gnt2b	ENSDARG00000091902	793362	Both	461.23	693.516	634.376	1.5772	6.41917e-05	4.19252	456.968	697.074	630.662	1.59899	5.15297e-05	4.28794
b3gnt5a	ENSDARG00000018971	336526	Both	703.472	778.415	563.78	1.09126	0.0248657	1.6044	680.632	757.378	540.568	1.08236	0.0265414	1.57608
bace2	ENSDARG00000044781	449818	Both	118.214	161.616	156.108	1.58187	0.00967949	2.01415	570.728	682.764	588.09	1.24631	0.00407189	2.3902
bach1b	ENSDARG00000002196	553688	Ens95only	622.079	550.312	548.865	1.18144	0.00286565	2.54278	131.113	77.6798	49.5025	0.836067	0.284094	0.546537
bada	ENSDARG00000087993	564921	Both	171.508	122.746	121.307	1.8866	0.00162244	2.78983	1267.75	1352.24	922.727	1.67947	0.000175111	3.75669
bag2	ENSDARG00000035005	393975	Both	395.34	138.089	178.978	1.73961	0.0157382	1.80305	390.448	139.006	177.219	1.7255	0.014762	1.83086
bag3	ENSDARG00000039486	445139	Both	2756.72	1674.46	2846.74	3.23952	4.51796e-07	6.34506	2721.56	1683.4	2834.51	3.24711	3.64271e-07	6.43858
bahd1	ENSDARG00000086789	564712	RefSeqOnly	1319.74	892.978	915.769	0.989452	0.0160948	1.79331	1281.25	897.406	906.886	1.01363	0.0114596	1.94083
bambia	ENSDARG00000055381	83496	Both	1185.05	1351.23	1105.68	1.77597	1.34714e-06	5.87059	1168.45	1357.35	1100.94	1.78365	1.09526e-06	5.96048
bambib	ENSDARG00000099677	431736	Both	776.145	641.349	880.968	1.31802	0.00355899	2.44867	766.434	643.924	877.185	1.32376	0.00325389	2.4876
baxb	ENSDARG00000030881	503609	Both	381.774	337.552	298.296	1.22724	0.00496311	2.30425	376.951	332.183	293.055	1.23625	0.00543555	2.26476
bbox1	ENSDARG00000036135	572649	Both	259.684	653.623	423.58	1.07901	0.0395407	1.40296	250.658	657.212	419.781	1.08427	0.0421137	1.37558
bcar1	ENSDARG00000056525	568309	Both	1451.52	1987.46	1492.47	1.07645	0.0110544	1.95647	1445.14	1999.23	1486.07	1.08171	0.0101444	1.99378
bckdk	ENSDARG00000016904	282677	Both	1885.62	1985.42	1457.67	1.24665	0.000889405	3.0509	1860.65	1995.14	1451.41	1.24773	0.000833828	3.07892
bcl7ba	ENSDARG00000111877	406444	RefSeqOnly	241.274	228.103	184.944	0.850033	0.0783157	1.10615	188.957	192.155	133.657	1.37563	0.00495496	2.30496
bco1	ENSDARG00000104256	84039	Both	483.516	453.138	355.967	1.38205	0.000773225	3.11169	477.214	455.858	354.438	1.41183	0.000603923	3.21902
bend3	ENSDARG00000076903	565716	Both	437.974	530.877	339.063	1.03147	0.018449	1.73403	432.867	533.537	337.607	1.02696	0.0192265	1.7161
bgna	ENSDARG00000017884	431774	Both	113.369	495.076	216.762	1.4084	0.0382904	1.41691	112.796	497.764	215.831	1.42855	0.0367674	1.43454
bgnb	ENSDARG00000002945	792197	Both	2558.08	1817.67	1364.21	3.0954	3.53487e-12	11.4516	2522	1815.25	1364.29	3.10236	2.2504e-12	11.6477
bhmt	ENSDARG00000013430	322228	Both	10278.8	12588.6	10285.2	2.43862	5.74432e-09	8.24076	10133.3	12643.4	10237.1	2.44785	4.09967e-09	8.38725
bicc1a	ENSDARG00000061682	568201	Both	926.335	1230.53	948.582	2.25167	1.46025e-07	6.83557	222.7	327.073	221.771	1.94628	0.000253649	3.59577
bicc1b	ENSDARG00000070497	571411	Both	274.219	226.057	215.768	1.24733	0.0458379	1.33878	3240.23	4700.65	3382.01	2.11599	1.01862e-06	5.99199
bida	ENSDARG00000069290	559425	Both	431.192	385.627	320.171	1.28062	0.00162897	2.78809	309.466	294.365	230.682	1.24239	0.00428868	2.36768
bmp16	ENSDARG00000103679	100329171	Both	594.948	833.651	589.632	1.98008	6.09605e-07	6.21495	99.299	229.973	143.557	1.95955	0.00161494	2.79184
bmp1a	ENSDARG00000028071	572452	Both	2092.98	1341	1111.65	1.57803	0.0005121	3.29065	2202.9	1468.76	1158.36	1.60344	0.000354849	3.44996
bmp2a	ENSDARG00000013409	30631	Both	637.582	653.623	850.144	2.15627	4.51017e-07	6.34581	602.543	635.748	790.06	2.15127	5.03421e-07	6.29807
bmp2b	ENSDARG00000041430	30632	Both	1030.98	1076.07	875.002	1.63199	4.5819e-05	4.33895	1018.06	1081.38	871.244	1.6386	3.95918e-05	4.40239
bmp3	ENSDARG00000060526	777717	Both	196.701	440.863	391.762	1.63966	0.00276295	2.55863	2871.96	4417.53	3560.22	2.00241	3.55579e-07	6.44906
bmp4	ENSDARG00000019995	30612	Both	1667.6	2938.75	2028.41	2.22244	7.05114e-07	6.15174	1645.66	2953.88	2018.71	2.22975	6.61247e-07	6.17964
bmp5	ENSDARG00000101701	394026	Both	984.474	1215.19	1273.72	1.89706	5.89251e-06	5.2297	971.781	1221.41	1272.21	1.90164	5.08497e-06	5.29371
bmp6	ENSDARG00000015686	503761	Both	110.463	197.417	113.353	1.44501	0.0100593	1.99743	109.904	198.288	112.866	1.44028	0.0120351	1.91955
bmp7b	ENSDARG00000063230	557567	Both	352.705	559.518	460.37	1.41513	0.0045494	2.34205	654.602	795.196	697.986	1.4025	0.00264994	2.57676
bmper	ENSDARG00000101980	338246	Both	79.4555	247.538	178.978	1.90405	0.00891762	2.04975	1267.75	1896	1362.31	2.3044	1.10797e-06	5.95547
bmpr1aa	ENSDARG00000019728	58145	Both	1347.84	2354.68	1468.61	1.13639	0.00591988	2.22769	935.146	1981.86	1219.74	1.1267	0.0115126	1.93882
bmpr1ab	ENSDARG00000105045	447846	Both	575.568	1175.29	761.649	1.26519	0.0126854	1.8967	568.8	1180.53	758.379	1.27395	0.0121879	1.91407
bmpr1ba	ENSDARG00000104100	30742	Both	558.127	642.371	483.24	1.11218	0.0126531	1.8978	557.231	648.013	487.105	1.1186	0.0115052	1.9391
bnc2	ENSDARG00000069989	559327	Both	2055.19	4283.84	2869.61	1.55377	0.000188822	3.72395	1307.28	2147.44	1640.51	1.46827	0.000157997	3.80135
bnip3lb	ENSDARG00000028067	554650	Both	521.306	799.896	739.774	1.21835	0.00464067	2.33342	514.812	803.372	737.588	1.23014	0.00423299	2.37335
bnip4	ENSDARG00000022832	568155	Both	512.585	664.875	411.649	1.23276	0.00325936	2.48687	506.136	664.366	407.901	1.25584	0.00279837	2.55309
boc	ENSDARG00000074335	334628	Ens95only	4142.35	9221.3	5872.46	1.01152	0.0368803	1.43321	1128.92	2320.17	1474.19	0.904362	0.104662	0.98021
boka	ENSDARG00000052129	445218	Both	202.515	211.737	179.972	1.26308	0.0124151	1.90605	195.706	212.597	179.199	1.25949	0.0135526	1.86798
brd2a	ENSDARG00000022280	30445	Both	7298.28	9763.43	6890.64	1.18432	0.0213796	1.67	6061.1	8677.65	6043.27	1.38232	0.012965	1.88723
bri3	ENSDARG00000086332	100002236	Both	835.252	607.593	700.002	1.21926	0.00135274	2.86879	824.278	611.217	696.996	1.2183	0.00123222	2.90931
btbd11a	ENSDARG00000063255	562893	Ens95only	369.178	474.618	489.206	1.08722	0.00879538	2.05575	543.734	691.963	661.354	0.969977	0.0288673	1.53959
btbd6a	ENSDARG00000076440	100141360	Both	726.727	1555.81	963.496	1.14868	0.0174797	1.75747	722.087	1564.84	959.359	1.15989	0.0162964	1.78791
btg1	ENSDARG00000027249	114432	Both	24299.8	21402.8	20236.4	1.16904	0.010718	1.96989	15179.3	10506.2	10375.7	1.2054	0.0158306	1.8005
bves	ENSDARG00000058548	415107	Both	97.866	197.417	105.398	1.70246	0.00364566	2.43822	78.0895	195.222	100.985	1.98113	0.00256705	2.59056
BX119963.4	ENSDARG00000117577	103910419	RefSeqOnly	52.3244	51.1442	52.699	1.5876	0.0718305	1.14369	41.4549	43.9504	31.6816	1.87712	0.0497086	1.30357
BX322530.1	ENSDARG00000088741	100537860	Both	1746.08	1687.76	1209.09	1.17726	0.00167762	2.77531	1055.65	720.582	616.801	1.02417	0.0171454	1.76585
BX510657.1	ENSDARG00000093899	100270729	Both	211.235	645.44	398.722	2.29851	0.000783904	3.10574	301.753	781.908	480.174	2.29047	0.000381436	3.41858
BX539336.1	ENSDARG00000100606	100331456	RefSeqOnly	13.5656	20.4577	16.9034	0.264277	0.8771	0.0569511	1499.13	2094.29	1292.02	1.69389	1.21308e-05	4.91611
BX545855.1	ENSDARG00000109861	100329887	Both	79.4555	130.929	60.6535	1.96096	0.00670618	2.17352	75.1973	132.873	53.4627	2.03123	0.0083967	2.07589
BX571715.1	ENSDARG00000104568	799265	Ens95only	246.118	578.953	355.967	1.43863	0.00399855	2.3981	68.4488	26.5747	41.5821	0.267961	0.826857	0.0825698
BX663503.3	ENSDARG00000099137	100333499	Both	930.211	1084.26	1746.03	1.26408	0.0108943	1.9628	919.721	1091.61	1734.57	1.27244	0.00979989	2.00878
BX908750.1	ENSDARG00000097553	110439470	Both	1192.8	1269.4	904.831	2.43847	1.13882e-09	8.94355	4013.42	2510.28	2162.27	2.02999	9.33588e-05	4.02984
BX927333.1	ENSDARG00000116937	567179	Both	1255.79	1103.69	990.343	2.52593	1.75524e-09	8.75566	455.04	139.006	182.169	2.36545	7.96217e-05	4.09897
BX957346.1	ENSDARG00000096850	563917	Both	88.1763	177.982	147.159	1.65535	0.00326553	2.48605	1416.22	1771.3	1423.69	2.27432	8.96418e-10	9.04749
bzw1b	ENSDARG00000099148	406812	Both	10451.3	11588.3	8094.76	2.01632	0.000140736	3.85159	10092.8	11520.1	7900.6	2.03204	0.000113694	3.94426
c1qtnf1	ENSDARG00000088878	550573	Both	381.774	610.662	399.717	3.49455	2.01304e-13	12.6961	427.082	661.3	420.771	3.12606	1.06192e-12	11.9739
c1qtnf12	ENSDARG00000070681	790933	Both	1288.73	660.783	950.57	1.56084	0.00117014	2.93176	1281.25	663.344	953.419	1.52952	0.0013679	2.86394
c1qtnf2	ENSDARG00000059944	572041	Both	274.219	369.261	240.626	1.44191	0.00537496	2.26962	124.365	155.36	103.955	1.35136	0.0425551	1.37105
c1qtnf5	ENSDARG00000056134	555815	Both	618.203	381.536	598.581	2.83641	3.87168e-10	9.4121	610.255	383.288	596.01	2.84326	3.49826e-10	9.45615
c1qtnf6a	ENSDARG00000055175	565113	Both	63.952	111.494	53.6933	2.34769	0.00340046	2.46846	595.794	559.09	294.045	2.81515	7.65154e-08	7.11625
c1qtnf6b	ENSDARG00000006544	570839	Both	33.9139	118.655	153.125	2.43642	0.00135784	2.86715	7.71254	55.1935	93.0647	2.29783	0.0313339	1.50399
c4b	ENSDARG00000038424	794635	Both	179.259	212.76	95.4548	1.91527	0.000808261	3.09245	177.389	203.398	84.1543	2.04907	0.00116253	2.9346
c6	ENSDARG00000057113	393611	Both	2077.47	2082.59	1316.48	2.18937	2.56242e-08	7.59135	1918.5	1902.13	1218.75	2.34691	1.29273e-09	8.88849
c7a	ENSDARG00000042172	562475	Both	88.1763	188.211	532.956	2.60241	0.000157903	3.80161	1003.59	753.289	1080.15	3.09243	5.00034e-16	15.301
ca5a	ENSDARG00000101778	569989	RefSeqOnly	70.7348	58.3044	45.7387	0.453916	0.642029	0.192445	1833.66	2595.12	2136.53	1.28471	0.000997774	3.00097
ca6	ENSDARG00000056499	100006448	Both	1854.61	3247.66	1482.53	2.10799	5.1394e-05	4.28909	1829.8	3261.53	1476.17	2.12735	4.8943e-05	4.31031
cab39l1	ENSDARG00000021374	406822	Both	955.404	1118.01	715.911	1.28717	0.00135784	2.86715	205.347	268.813	184.149	1.3511	0.00432511	2.364
CABZ01027646.1	ENSDARG00000009624	559133	Both	177.322	175.936	139.205	1.44769	0.00627993	2.20205	174.496	170.691	130.687	1.47982	0.00534432	2.27211
CABZ01043952.1	ENSDARG00000110954	562793	RefSeqOnly	31.007	9.20596	18.8921	0.719773	0.66655	0.176167	235.233	155.36	193.06	1.38535	0.012468	1.9042
CABZ01044746.1	ENSDARG00000117312	321191	Both	315.884	261.858	361.933	1.46997	0.000799541	3.09716	261.262	203.398	283.154	1.64446	0.00108839	2.96322
CABZ01058333.1	ENSDARG00000113458	100535316	Both	431.192	394.833	398.722	1.33957	0.00890155	2.05053	479.142	428.261	427.702	1.41914	0.00940998	2.02641
CABZ01058650.1	ENSDARG00000101063	561325	Both	1168.58	1114.94	1127.56	1.56017	0.00037707	3.42358	1183.88	1143.73	1146.48	1.56153	0.000288784	3.53943
CABZ01060030.1	ENSDARG00000106579	100331257	Both	72.6727	68.5333	65.6251	2.28389	0.00110752	2.95565	213.059	205.443	193.06	1.66654	0.00265631	2.57572
CABZ01061591.1	ENSDARG00000112977	100329328	Ens95only	1255.79	1349.18	1310.51	1.9866	1.62557e-08	7.78899	116.652	89.945	114.846	1.06875	0.0869498	1.06073
CABZ01064941.1	ENSDARG00000117393	100535166	Both	316.853	104.334	134.233	1.96041	0.00558933	2.25264	236.197	99.1439	67.3234	3.21716	3.1663e-05	4.49945
CABZ01068358.1	ENSDARG00000106669	562542	Both	105.618	274.133	148.154	2.14212	0.00030261	3.51912	114.724	303.564	184.149	2.08353	0.000328213	3.48384
CABZ01071020.1	ENSDARG00000079472	100333265	Both	54.2623	163.662	73.5797	2.54024	0.000450132	3.34666	62.6644	176.824	80.1941	2.58857	0.000264854	3.57699
CABZ01073265.1	ENSDARG00000099425	557557	Both	1613.34	6107.64	2944.18	4.21292	1.0557e-09	8.97646	2511.4	7533.92	3616.65	4.03742	9.74581e-10	9.01118
CABZ01074397.1	ENSDARG00000104672	100535428	Both	780.021	512.465	468.325	1.2638	0.00431697	2.36482	586.153	400.664	397.01	1.15267	0.00850611	2.07027
CABZ01090041.1	ENSDARG00000034667	100331214	Both	172.477	175.936	265.484	2.54247	1.02311e-05	4.99008	167.748	173.757	281.174	2.65631	9.54809e-06	5.02008
CABZ01092746.1	ENSDARG00000117319	100535731	Both	1854.61	2108.16	1926.99	1.52783	0.00411561	2.38557	1830.77	2118.82	1918.72	1.53444	0.00384212	2.41543
cacna1g	ENSDARG00000089913	563904	RefSeqOnly	214.142	290.499	294.319	0.834323	0.111457	0.952894	913.937	1119.2	929.657	1.03902	0.00492887	2.30725
cacna2d1a	ENSDARG00000014804	561434	RefSeqOnly	45.5416	32.7323	44.7444	0.707598	0.482709	0.316315	312.358	386.355	343.548	1.08081	0.0171367	1.76607
cacnb2a	ENSDARG00000099045	795492	Ens95only	411.812	183.096	249.574	1.46641	0.00614871	2.21122	223.664	32.7073	86.1344	1.35981	0.121754	0.914516
calcoco1a	ENSDARG00000036695	334971	Both	333.326	900.138	700.002	1.40964	0.0132694	1.87715	1176.16	1832.63	1441.51	1.23243	0.00173304	2.76119
calcrla	ENSDARG00000011473	445508	Both	825.562	990.152	738.78	1.74928	0.000252328	3.59804	814.638	995.528	735.608	1.75749	0.000234205	3.6304
calcrlb	ENSDARG00000011571	567131	RefSeqOnly	31.976	34.7781	23.8637	1.8116	0.0651317	1.18621	67.4848	85.8566	54.4528	1.85396	0.0105514	1.97669
cald1a	ENSDARG00000070314	322909	Both	6247.92	4181.55	3558.67	2.72495	2.7181e-09	8.56573	12786.4	14005.9	11936	2.76267	1.15143e-14	13.9388
cald1b	ENSDARG00000086391	563892	Both	627.893	521.671	545.882	1.22917	0.00637164	2.19575	733.656	655.168	601.951	1.31859	0.00283189	2.54792
calhm2	ENSDARG00000039482	368657	Both	309.101	646.463	479.262	1.54427	0.000612385	3.21298	254.514	593.841	447.503	1.83109	0.000106998	3.97062
calua	ENSDARG00000045676	415241	Both	1155.01	3913.56	2309.81	1.92702	0.000160571	3.79433	1140.49	3933.05	2299.89	1.93897	0.000150443	3.82263
calub	ENSDARG00000005115	394057	Both	528.089	2652.34	1725.15	1.98516	0.00187937	2.72599	511.92	2662.58	1712.79	2.00219	0.00177788	2.7501
capn12	ENSDARG00000010758	799247	Both	127.904	175.936	169.034	2.18723	1.77856e-05	4.74993	126.293	177.846	171.279	2.19097	2.24972e-05	4.64787
capn2a	ENSDARG00000091699	541374	Ens95only	1031.95	1496.48	1453.7	2.16466	2.34362e-08	7.63011	60.7363	22.4862	32.6717	0.714157	0.529115	0.27645
casp7	ENSDARG00000091836	553634	Both	147.283	262.881	242.614	1.25956	0.0131941	1.87962	145.574	264.724	241.572	1.18813	0.0224878	1.64805
casp8	ENSDARG00000058325	58022	Both	132.749	302.774	189.915	1.21012	0.0365907	1.43663	107.976	293.343	172.269	1.33905	0.0251295	1.59982
casp9	ENSDARG00000004325	492763	Both	657.931	305.842	309.234	1.4814	0.00278365	2.55538	636.285	301.52	293.055	1.48717	0.00288134	2.54041
cast	ENSDARG00000058693	563084	Both	1946.66	1789.02	2213.36	1.82656	1.23285e-06	5.90909	1923.32	1796.86	2204.84	1.83422	9.57025e-07	6.01908
cav1	ENSDARG00000103747	323695	Ens95only	508.709	882.749	965.485	1.57858	0.000226315	3.64529	19.2814	50.083	34.6518	0.735398	0.534322	0.272197
cav2	ENSDARG00000052000	415240	Both	306.195	248.561	414.632	1.44751	0.00245603	2.60977	302.717	248.371	412.851	1.45445	0.00244477	2.61176
cavin2b	ENSDARG00000071196	447845	Both	3135.59	4009.71	3556.68	1.07973	0.0124313	1.90549	3096.59	4030.15	3541.41	1.08606	0.0114803	1.94005
cbfb	ENSDARG00000040917	30744	Both	1045.52	2096.91	1677.42	1.03528	0.0219183	1.65919	1032.52	2107.57	1671.21	1.03941	0.0210956	1.67581
cbx7a	ENSDARG00000038025	550551	Both	24295	12526.2	15342.4	2.38277	0.0012833	2.89167	23980.2	12590.3	15280.4	2.38707	0.00118336	2.92688
ccbe1	ENSDARG00000086158	555629	Both	397.278	231.172	239.631	2.65483	4.92556e-08	7.30754	396.232	235.084	241.572	2.65842	6.1614e-08	7.21032
ccdc125	ENSDARG00000056477	565477	Both	705.41	430.634	457.387	1.44336	0.00180541	2.74342	696.057	438.482	455.423	1.44837	0.00157002	2.80409
ccdc136b	ENSDARG00000057921	100330186	RefSeqOnly	51.3554	32.7323	25.8523	-1.71481	0.0228731	1.64067	1114.46	1616.97	1202.91	1.39742	0.000366835	3.43553
ccdc187	ENSDARG00000053857	100037381	Both	974.784	1388.05	980.4	1.40048	0.0014116	2.85029	948.643	1418.68	999.951	1.40101	0.00117547	2.92979
ccdc3b	ENSDARG00000030632	553593	Both	325.574	969.694	498.154	1.11936	0.0397372	1.4008	321.999	975.086	496.015	1.12977	0.038713	1.41214
ccdc80	ENSDARG00000000002	368419	Both	1773.22	1635.59	2045.32	2.10675	2.70958e-05	4.5671	1750.75	1645.58	2038.51	2.10443	2.43576e-05	4.61337
ccdc80l1	ENSDARG00000030975	569128	Both	98.8349	162.639	197.87	2.04589	0.000429489	3.36705	71.341	104.254	115.836	1.98039	0.00204037	2.69029
ccdc80l2	ENSDARG00000044695	796417	Both	811.028	2386.39	1414.92	2.64332	2.76714e-07	6.55797	1259.07	3057.11	1939.51	2.60507	6.44741e-08	7.19061
ccdc85b	ENSDARG00000061543	564324	Both	1186.99	2462.08	1582.96	1.00102	0.0273446	1.56313	1166.52	2494.95	1586.06	1.01264	0.0259844	1.58529
ccdc90b	ENSDARG00000044626	100149897	Both	184.104	220.943	222.728	1.12257	0.0216578	1.66439	174.496	220.774	221.771	1.1129	0.0266046	1.57504
ccl25b	ENSDARG00000070873	795788	Both	4823.53	5688.26	2948.16	1.4026	0.00166826	2.77774	4760.57	5707.42	2923.62	1.41559	0.00146486	2.8342
ccl38.1	ENSDARG00000041919	794050	Ens95only	120.152	82.8536	61.6479	2.01192	0.00378391	2.42206	37.5987	22.4862	17.8209	1.63217	0.145582	0.836892
ccl44	ENSDARG00000074772	100141480	Both	946.684	1234.62	541.905	1.77978	0.000277874	3.55615	392.376	501.852	242.562	1.67658	0.00121239	2.91636
ccnd2a	ENSDARG00000051748	799608	RefSeqOnly	1499.97	1100.62	970.457	0.871638	0.0863346	1.06382	3103.34	5333.33	4379.98	1.17743	0.00635751	2.19671
ccng1	ENSDARG00000076667	171473	Both	8394.19	9271.42	10211.7	1.39003	0.000824994	3.08355	8096.24	9218.34	10049	1.40167	0.000682127	3.16613
ccnl1a	ENSDARG00000055124	553269	Both	5196.59	9216.19	5183.39	1.47254	0.0124589	1.90452	5128.84	9224.47	5159.15	1.48368	0.0112558	1.94862
cd151	ENSDARG00000038288	450020	Both	271.312	308.911	227.699	1.71631	0.000115365	3.93793	268.011	310.719	215.831	1.72148	0.00015906	3.79844
cd164	ENSDARG00000013628	555639	Ens95only	1903.06	2447.76	2212.36	1.35308	0.000743013	3.129	200.526	134.917	108.906	1.11683	0.0535354	1.27136
cd248a	ENSDARG00000103713	323364	Both	4695.63	6995.51	5827.71	3.08756	3.0662e-16	15.5134	4658.38	7061.7	5820.51	3.09525	2.31389e-16	15.6357
cd248b	ENSDARG00000077938	100002565	Both	201.546	1119.04	711.933	2.24449	0.000546997	3.26201	839.703	3127.63	1797.93	2.22835	8.67365e-05	4.0618
cd276	ENSDARG00000003061	791140	Both	337.202	348.804	312.217	1.68004	8.16656e-05	4.08796	329.711	350.581	297.015	1.80452	3.32211e-05	4.47859
cd28	ENSDARG00000095070	101886406	Ens95only	640.489	576.907	372.87	2.09268	4.73231e-07	6.32493	16.3892	77.6798	45.5423	2.01591	0.0592187	1.22754
cd28l	ENSDARG00000069978	100004384	Both	83.3314	366.193	282.387	2.38866	0.00131713	2.88037	86.7661	414.974	328.697	2.40649	0.000945278	3.02444
cd302	ENSDARG00000086100	100333685	RefSeqOnly	25.1932	8.18308	11.9318	0.750924	0.653411	0.184814	770.29	678.676	549.478	1.19194	0.0161559	1.79167
cd63	ENSDARG00000025147	321461	Both	8775.96	9356.32	7535.95	1.21526	0.00507292	2.29474	8663.12	9386.99	7477.85	1.22442	0.00453778	2.34316
cd79a	ENSDARG00000037473	798792	RefSeqOnly	24.2242	36.8238	55.6819	1.40147	0.133841	0.873411	64.5926	183.978	130.687	1.56038	0.0264661	1.57731
cd81a	ENSDARG00000036080	58031	Both	43833.3	68122.1	51256.2	1.63171	2.3958e-05	4.62055	43083.2	68129.2	50753	1.64324	2.09422e-05	4.67898
cd82a	ENSDARG00000019098	324098	Both	2126.89	4576.39	2203.41	1.2427	0.00701894	2.15373	2066	4891.78	2184.05	1.25505	0.00920835	2.03582
cd82b	ENSDARG00000026070	324137	Both	1182.14	2238.07	1501.42	1.51196	0.000298245	3.52543	1162.67	2239.43	1490.03	1.52082	0.00027819	3.55566
cdc42	ENSDARG00000044573	336839	RefSeqOnly	2856.52	6162.88	4377	0.991731	0.0307306	1.51243	2819.9	6193.94	4359.19	1.00077	0.0287419	1.54148
cdc42ep3	ENSDARG00000052783	447829	Both	480.609	570.77	359.944	1.84985	0.000276573	3.55819	481.07	576.466	359.388	1.81371	0.00028453	3.54587
cdc42ep4b	ENSDARG00000045036	100002938	Ens95only	1587.17	2574.6	1874.29	1.24847	0.00320745	2.49384	60.7363	79.724	68.3135	0.422749	0.662766	0.17864
cdc42ep5	ENSDARG00000062390	558275	Both	739.324	596.342	590.626	1.41129	0.000408595	3.38871	1290.89	1567.9	1187.07	1.45886	0.000119234	3.9236
cdc42se1	ENSDARG00000023724	791998	Both	122.09	133.998	149.148	1.48929	0.00545704	2.26304	120.509	134.917	148.508	1.50943	0.0057015	2.24401
cdh11	ENSDARG00000021442	30461	Both	9018.2	15838.3	10673	1.89441	1.28913e-05	4.8897	9319.65	16147.2	10805.4	1.89028	1.19807e-05	4.92152
cdkn1ba	ENSDARG00000029018	402862	Both	2012.55	3601.58	2377.42	1.4203	0.000371759	3.42974	1972.48	3614.15	2365.23	1.42702	0.000361111	3.44236
cdkn1cb	ENSDARG00000104903	100004175	Both	1426.32	729.317	896.877	2.49293	5.69047e-05	4.24485	1412.36	732.847	893.026	2.49927	5.03752e-05	4.29778
cdo1	ENSDARG00000099389	393714	Both	1453.45	1501.59	1447.73	1.18408	0.0186293	1.7298	1434.53	1507.6	1439.53	1.19186	0.0174942	1.75711
cdon	ENSDARG00000061328	280652	Both	3106.52	4803.47	4436.66	1.48797	0.000787899	3.10353	3281.69	5054.3	4606.7	1.49215	0.000704863	3.1519
cdyl	ENSDARG00000038985	568457	RefSeqOnly	135.656	48.0756	57.6706	0.400173	0.684434	0.164669	402.98	568.289	427.702	1.06962	0.0155388	1.80858
cebpd	ENSDARG00000087303	140817	Both	24793	23282.9	15283.7	1.91718	3.54633e-05	4.45022	19307.4	18620.7	12580.6	1.8743	6.74136e-05	4.17125
cebpg	ENSDARG00000036073	140816	Both	2921.44	3399.05	2239.21	1.29974	0.0005148	3.28836	2872.92	3405.64	2221.67	1.3138	0.000411003	3.38615
cemip	ENSDARG00000039881	100003660	Both	1097.84	1857.56	776.564	1.70026	0.000539838	3.26774	913.937	1635.36	687.095	1.73822	0.000369311	3.43261
cemip2	ENSDARG00000061600	566851	Both	809.09	1596.72	1031.11	1.51204	0.000813493	3.08965	791.5	1591.41	1013.81	1.56109	0.000637767	3.19534
cercam	ENSDARG00000079049	558337	Both	91.0832	284.362	203.836	2.0817	0.000468321	3.32946	1149.17	1945.06	1359.34	1.9252	1.86327e-06	5.72972
cers2a	ENSDARG00000013704	259251	RefSeqOnly	261.622	194.348	140.199	0.840468	0.198861	0.70145	214.023	169.669	104.945	1.21711	0.0469302	1.32855
cers2b	ENSDARG00000058992	565295	Ens95only	1299.39	1584.45	1317.47	1.43479	0.00109776	2.95949	207.275	43.9504	167.319	0.602009	0.580335	0.236321
cfd	ENSDARG00000039579	553553	Both	1578.45	788.644	1526.28	1.83214	0.00299203	2.52403	1557.93	792.129	1519.73	1.83574	0.00282955	2.54828
cfl1	ENSDARG00000021124	321496	Both	5212.09	5784.41	5625.86	1.39603	0.00143233	2.84396	5141.38	5814.74	5601.71	1.40257	0.00125025	2.903
cflara	ENSDARG00000055966	373114	Both	230.615	503.259	350.001	1.49849	0.00436508	2.36001	571.692	964.865	561.359	1.49804	0.000462981	3.33444
cfp	ENSDARG00000094451	556399	Both	1036.8	964.58	738.78	1.72365	0.000120412	3.91933	1030.59	974.063	740.558	1.72749	0.000107424	3.9689
cgnl1	ENSDARG00000015805	553350	Both	880.794	1743	1061.93	2.02255	3.08267e-06	5.51107	845.488	1744.73	1044.5	2.06447	2.02969e-06	5.69257
ch25h	ENSDARG00000045190	494109	Both	318.791	215.829	235.654	1.67314	0.00694184	2.15853	315.25	216.686	234.642	1.67918	0.00678708	2.16832
chac1	ENSDARG00000070426	563855	Both	8937.78	11473.7	7057.69	1.27451	0.00136302	2.8655	8891.6	11653	7114.5	1.27436	0.00126818	2.89682
chad	ENSDARG00000045071	394038	Both	1153.07	1110.85	700.002	4.39694	3.26151e-19	18.4866	1138.56	1116.14	696.996	4.39557	2.74642e-19	18.5612
chadlb	ENSDARG00000075903	100330176	Both	56.2003	58.3044	120.313	1.85343	0.0247526	1.60638	62.6644	128.785	206.921	2.22326	0.0064299	2.1918
chka	ENSDARG00000041078	558499	Both	2399.17	1011.63	1349.29	1.47001	0.00147669	2.83071	2367.75	1016.99	1343.5	1.4716	0.00127108	2.89583
chmp2a	ENSDARG00000053979	798901	Both	1610.43	2222.73	1272.73	1.15711	0.00411561	2.38557	1638.92	2263.96	1278.16	1.11533	0.00577719	2.23828
chmp4ba	ENSDARG00000016255	393164	Both	2927.26	1795.16	1545.17	1.46717	0.00105205	2.97796	2944.26	1812.19	1563.29	1.47546	0.000912015	3.04
chrd	ENSDARG00000006110	30161	Both	256.777	556.449	259.518	1.65388	0.00116718	2.93286	239.089	509.007	244.542	1.65059	0.00122728	2.91106
chst11	ENSDARG00000034375	404232	Both	277.125	302.774	269.461	1.4242	0.000654744	3.18393	708.59	570.333	509.876	1.40339	0.000603099	3.21961
CHST13	ENSDARG00000004018	565671	RefSeqOnly	25.1932	26.595	18.8921	0.893924	0.507326	0.294713	889.835	1098.76	682.145	1.50484	0.00119845	2.92138
chst14	ENSDARG00000043011	404732	Both	312.977	352.895	263.495	1.6721	0.000257059	3.58997	306.574	350.581	262.363	1.67636	0.000254189	3.59484
chst2b	ENSDARG00000058585	100006249	Both	187.011	457.229	299.29	1.47073	0.00502149	2.29917	185.101	459.946	298.005	1.47445	0.00511142	2.29146
chsy1	ENSDARG00000079027	324407	Both	816.842	588.159	722.871	1.11506	0.00846454	2.0724	805.961	590.775	719.767	1.11812	0.00761501	2.11833
chsy3	ENSDARG00000069472	368477	Ens95only	328.481	478.71	339.063	1.55375	0.000779697	3.10807	14.461	9.19892	15.8408	0.507258	0.787996	0.103476
cilp	ENSDARG00000053362	553329	Both	869.166	3161.74	1259.8	1.39726	0.0158607	1.79968	864.769	3179.76	1254.39	1.40924	0.0149476	1.82543
cish	ENSDARG00000060316	767678	Both	2060.03	1752.2	1725.15	1.39301	0.00489435	2.31031	2043.82	1751.88	1725.66	1.39988	0.0044478	2.35185
cishb	ENSDARG00000016773	100136861	Both	440.881	142.181	161.08	1.35297	0.0350272	1.4556	435.759	146.161	161.378	1.34744	0.0348568	1.45771
cited4a	ENSDARG00000035990	562291	Both	1986.39	3389.84	2315.77	1.13179	0.019566	1.7085	1959.95	3406.67	2305.83	1.14022	0.0182886	1.73782
cited4b	ENSDARG00000101009	100006037	Both	1388.53	1484.21	1157.39	1.21686	0.000674547	3.17099	1370.9	1491.25	1151.43	1.22163	0.000596177	3.22462
ckap4	ENSDARG00000032405	406549	Both	1089.12	1671.39	1104.69	2.28787	2.92531e-08	7.53383	1074.94	1680.34	1099.95	2.29521	2.59788e-08	7.58538
ckba	ENSDARG00000069752	564694	Both	710.255	974.809	838.212	1.17115	0.00622313	2.20599	711.482	982.24	832.632	1.14777	0.00807889	2.09265
clcf1	ENSDARG00000076140	562247	Both	319.76	448.023	299.29	1.20315	0.0211148	1.67541	372.13	466.079	319.786	1.17112	0.0225853	1.64617
clcn5b	ENSDARG00000022466	557584	Both	490.299	262.881	230.682	1.31215	0.00867548	2.06171	480.106	259.614	230.682	1.38554	0.00508543	2.29367
cldn11a	ENSDARG00000020031	436897	Both	7630.64	10431.4	7882.97	2.67706	2.45632e-09	8.60971	7526.48	10451	7835.26	2.68234	2.04739e-09	8.6888
cldn11b	ENSDARG00000030723	81592	Both	1005.79	1741.97	1077.84	1.51793	0.000723347	3.14065	602.543	1258.21	818.772	1.4604	0.00238639	2.62226
clec11a	ENSDARG00000079107	568355	Both	129.842	112.517	81.5343	2.12486	0.00029149	3.53538	144.61	137.984	86.1344	1.83529	0.00109181	2.96185
clec14a	ENSDARG00000103533	327325	Both	234.491	258.79	151.137	1.57886	0.0123483	1.90839	231.376	259.614	150.488	1.58163	0.0132224	1.87869
CLEC3A	ENSDARG00000110756	100330122	Ens95only	570.723	531.9	476.279	4.81305	3.06996e-18	17.5129	24.1017	18.3978	15.8408	1.76557	0.204007	0.690356
clec3ba	ENSDARG00000076541	572488	Both	227.708	113.54	170.029	2.17428	0.000545861	3.26292	226.556	114.475	177.219	1.99559	0.00111134	2.95415
clic2	ENSDARG00000010625	436834	Both	786.804	972.763	929.69	1.92289	4.40536e-07	6.35602	777.039	978.152	923.717	1.9303	4.0265e-07	6.39507
clic4	ENSDARG00000022995	368255	Both	1108.5	2090.78	2303.84	1.64667	0.00101993	2.99143	1089.4	2101.44	2289.99	1.65793	0.000925574	3.03359
clint1a	ENSDARG00000025535	323870	Ens95only	1422.45	1734.81	1296.59	1.01727	0.010744	1.96883	546.627	580.554	494.035	0.919387	0.0297384	1.52668
clk4a	ENSDARG00000089372	321857	Both	10753.6	10828.3	9123.88	1.11267	0.00266253	2.57471	10646.2	10869	9129.26	1.11988	0.0021938	2.6588
cmbl	ENSDARG00000073786	100151256	Both	1183.11	779.438	744.746	1.45527	0.00397212	2.40098	1245.58	803.372	768.279	1.42653	0.00526622	2.2785
cmtm3	ENSDARG00000008811	445074	Both	227.708	619.868	465.342	1.98616	6.64614e-05	4.17743	223.664	622.46	460.373	2.0294	5.41597e-05	4.26632
cmtm7	ENSDARG00000010032	559138	Both	639.52	795.804	582.672	1.58791	0.000112963	3.94706	631.465	799.284	580.17	1.59347	0.000109419	3.96091
cnmd	ENSDARG00000100133	791772	Both	23507.2	20319.6	18827.5	4.23482	9.91843e-20	19.0036	23199.3	20416.5	18740.7	4.2418	4.89848e-20	19.3099
cnn1b	ENSDARG00000102398	572250	RefSeqOnly	4.84485	8.18308	5.96592	0.861517	1	0	279.58	279.034	245.533	2.62801	1.18868e-06	5.92494
cnn2	ENSDARG00000035858	406658	Both	8437.79	14601.7	8673.46	2.39874	7.41371e-07	6.12996	8317.98	14622.2	8632.25	2.40708	6.13999e-07	6.21183
cnn3a	ENSDARG00000099510	326931	Both	4638.46	8437.77	5818.76	2.06953	2.29984e-05	4.6383	4577.4	8479.36	5793.78	2.0789	2.01677e-05	4.69534
cnnm2b	ENSDARG00000078733	565702	Both	189.918	220.943	185.938	1.09228	0.0185059	1.73269	196.67	226.907	182.169	1.11873	0.0173734	1.76011
cnppd1	ENSDARG00000027078	334868	Both	1885.62	2125.55	1661.51	1.03188	0.00987252	2.00557	1835.59	2130.06	1641.5	1.07156	0.00785849	2.10466
cnpy4	ENSDARG00000055797	568776	Both	427.316	854.109	773.581	1.99112	1.11879e-05	4.95125	422.262	858.566	769.269	2.00255	1.13371e-05	4.9455
cntfr	ENSDARG00000028661	368438	Both	2032.9	2653.36	2157.68	1.57659	7.09917e-06	5.14879	2006.23	2667.69	2148.41	1.5841	5.90622e-06	5.22869
coch	ENSDARG00000024032	368851	Both	845.911	1992.58	1686.37	2.77017	6.0402e-08	7.21895	412.621	1027.21	967.279	2.77981	8.08945e-08	7.09208
col10a1a	ENSDARG00000054753	558919	Both	15739.9	31671.6	19778	1.10219	0.0384699	1.41488	15535	31833.4	19694.1	1.11158	0.0357927	1.44621
col10a1b	ENSDARG00000101535	555804	Both	60.0761	273.11	104.404	2.13527	0.0029818	2.52552	63.6285	297.432	119.796	2.01288	0.00494753	2.30561
col11a1a	ENSDARG00000026165	565402	Both	143521	85873.2	83901.7	4.30259	7.81572e-20	19.107	141742	86350.3	83582	4.30563	2.9649e-20	19.528
col11a1b	ENSDARG00000009014	555202	Both	7251.77	16677.1	9535.53	1.97701	5.75554e-05	4.23991	1140.49	2636	1792.98	1.83884	0.0015213	2.81778
col11a2	ENSDARG00000012422	561679	Both	45893.3	31491.5	27930.5	4.31912	4.03281e-20	19.3944	45164.7	31568.7	27777.8	4.32194	1.76976e-20	19.7521
col12a1a	ENSDARG00000078322	100149543	Both	17023.8	43538.1	25572.9	1.50087	0.00435645	2.36087	16808.5	43780.7	25457.2	1.51171	0.00396632	2.40161
col15a1b	ENSDARG00000061848	558137	Both	1576.51	1797.21	1638.64	1.28088	0.0141125	1.8504	1572.4	1815.25	1636.55	1.28024	0.013765	1.86122
col16a1	ENSDARG00000009194	100535782	Both	649.21	1320.54	877.985	1.84844	8.81753e-05	4.05465	2351.36	3907.5	2666.21	1.84733	4.51318e-06	5.34552
col17a1a	ENSDARG00000069415	557257	Both	154.066	314.026	154.12	2.20991	0.000195216	3.70948	930.326	1058.9	474.234	2.75845	8.05756e-07	6.0938
col18a1a	ENSDARG00000036558	564123	Both	5322.55	11473.7	6362.66	1.61089	0.000323035	3.49075	5253.21	11532.4	6339.29	1.6198	0.000302993	3.51857
col18a1b	ENSDARG00000095901	100334893	Both	919.553	2115.33	1156.39	1.73031	0.000210156	3.67746	912.972	2140.28	1159.35	1.72137	0.000244001	3.61261
col1a1a	ENSDARG00000012405	337158	Both	81055.3	141820	108738	2.05614	7.18183e-07	6.14377	75718.9	137933	105359	2.06779	7.03367e-07	6.15282
col1a1b	ENSDARG00000035809	325675	Both	33935.3	60204.9	37542.6	1.57015	0.000465073	3.33248	34800	62152	38343.7	1.58185	0.000384138	3.41551
col1a2	ENSDARG00000020007	336471	Both	30872.4	78079.8	54566.3	1.63357	0.00117663	2.92936	30453	78451.5	54323.1	1.64406	0.0010668	2.97192
col27a1b	ENSDARG00000099930	560145	Both	671.496	591.227	530.967	1.6171	0.00364566	2.43822	1017.09	1561.77	1001.93	1.86513	0.000418301	3.37851
col2a1a	ENSDARG00000069093	562496	Both	476650	373550	307329	4.23794	7.63824e-19	18.117	470511	375475	306030	4.24317	3.38419e-19	18.4705
col2a1b	ENSDARG00000011407	503730	Both	76480.8	69907	56174.1	3.3019	2.62976e-15	14.5801	75493.3	70277.7	55943.8	3.30704	1.32266e-15	14.8786
col4a1	ENSDARG00000055009	554269	Both	5127.79	4208.15	3115.21	2.83563	2.1317e-13	12.6713	3739.62	3095.95	2357.31	2.76229	2.46619e-12	11.608
col4a2	ENSDARG00000104110	553355	Both	758.704	259.813	339.063	2.09045	0.000265949	3.5752	5860.57	4946.97	4611.66	2.2343	4.0452e-08	7.39306
col4a3bpa	ENSDARG00000024325	796455	Ens95only	352.705	435.749	336.08	1.11165	0.0104853	1.97942	124.365	135.94	108.906	0.741655	0.328539	0.483414
col5a1	ENSDARG00000012593	100334431	Both	66105.1	111699	72731.5	2.01108	1.00406e-05	4.99824	65236.6	112280	72425.2	2.0197	8.63193e-06	5.06389
col5a2a	ENSDARG00000031678	564821	Both	5934.94	13415.1	8978.71	1.4389	0.00212829	2.67197	8365.22	17225.5	11931.1	1.36982	0.00283324	2.54772
col5a3a	ENSDARG00000098294	100330523	Both	633.706	306.865	193.892	2.35567	2.22322e-05	4.65302	664.243	346.493	230.682	2.33303	1.00394e-05	4.99829
col5a3b	ENSDARG00000101816	100463515	Both	110.463	434.726	187.927	2.28287	0.000185383	3.73193	453.112	681.742	397.01	1.45406	0.00388363	2.41076
col6a1	ENSDARG00000074908	569755	Both	10543.4	29439.6	12636.8	1.80503	0.000170473	3.76834	10406.2	29583.7	12583.5	1.81557	0.00015906	3.79844
col6a2	ENSDARG00000061436	567771	Both	5676.23	16482.8	9084.11	1.80129	0.000121565	3.91519	752.937	1233.68	996.981	1.30815	0.00378649	2.42176
col6a4a	ENSDARG00000079752	564005	Both	971.877	3730.46	2066.2	1.55199	0.00665439	2.17689	4115.61	12538.1	6565.02	1.5826	0.00144928	2.83885
col8a2	ENSDARG00000060893	794479	Both	672.465	943.099	630.399	2.37051	4.92461e-08	7.30763	664.243	947.489	627.692	2.38094	4.77215e-08	7.32129
col9a1a	ENSDARG00000073699	100170785	Both	20489.8	16474.6	14201.9	4.24132	3.30343e-20	19.481	2777.48	4188.58	3337.46	4.13551	1.42434e-14	13.8464
col9a1b	ENSDARG00000031483	406548	Both	1516.44	2857.94	1520.32	2.88026	2.05899e-08	7.68635	1491.41	2872.11	1502.9	2.89078	2.17693e-08	7.66215
col9a2	ENSDARG00000024492	321212	Both	47434	47758.5	39633.6	4.11635	4.07583e-21	20.3898	49189.6	49225.5	40620.8	4.12307	2.05798e-21	20.6866
col9a3	ENSDARG00000037845	567110	Both	29899.5	47786.1	35925.8	4.25602	1.28246e-20	19.892	29514	48031.7	35773.5	4.26466	8.245e-21	20.0838
COLEC10	ENSDARG00000104752	794040	Both	85.2694	39.8925	96.4491	2.1127	0.00846528	2.07236	84.838	39.862	96.0349	2.10345	0.0101942	1.99165
colec11	ENSDARG00000013266	492459	Both	254.839	66.4875	293.324	2.48477	0.000145414	3.83739	249.694	65.4145	292.065	2.69421	8.71349e-05	4.05981
colec12	ENSDARG00000061140	558942	Both	6278.93	9321.55	6259.25	2.24703	1.05499e-07	6.97675	6380.2	10435.7	6696.7	2.29505	6.33642e-08	7.19816
colgalt1	ENSDARG00000073974	565862	RefSeqOnly	9.6897	12.2746	3.97728	-0.236398	0.915071	0.0385451	1050.83	1423.79	881.145	1.68766	1.77311e-05	4.75126
coq10b	ENSDARG00000056141	550442	Ens95only	732.541	874.566	640.342	1.19615	0.0031901	2.4962	102.191	118.564	80.1941	1.19183	0.062662	1.203
cox4i2	ENSDARG00000022509	393776	Both	2448.59	2173.63	1831.54	1.59327	1.06056e-05	4.97446	2406.31	2160.72	1797.93	1.59911	9.57961e-06	5.01865
cp	ENSDARG00000010312	84702	Both	497.082	552.358	792.473	3.03299	9.41378e-06	5.02624	477.214	531.493	769.269	3.08186	9.41721e-06	5.02608
cpeb1b	ENSDARG00000008454	30702	Both	161.818	94.1054	87.5002	2.19284	0.00161243	2.79252	160.035	94.0334	82.1742	2.3698	0.00037914	3.4212
cped1	ENSDARG00000045747	565332	Both	91.0832	448.023	401.705	2.12122	0.00231094	2.63621	1375.73	2671.78	2223.65	2.33956	5.64143e-07	6.24861
cpn1	ENSDARG00000005185	337172	Both	4959.19	6506.57	4557.96	2.59827	1.12186e-12	11.9501	4894.57	6525.1	4533.44	2.61598	5.44471e-13	12.264
cpne1	ENSDARG00000075536	324841	Both	1788.72	3993.34	2783.1	1.20794	0.00590282	2.22894	1770.99	4018.91	2778.08	1.22145	0.00523625	2.28098
cpne3	ENSDARG00000104177	393136	RefSeqOnly	158.911	248.561	166.051	1.17142	0.0572828	1.24198	820.422	1474.89	878.175	1.37692	0.00120649	2.91848
CPNE8	ENSDARG00000102191	101886030	Ens95only	375.96	412.222	342.046	1.10451	0.0226101	1.6457	241.981	139.006	130.687	1.09495	0.094154	1.02616
cpt1b	ENSDARG00000058285	449677	Both	168.601	216.852	180.966	1.2484	0.0205796	1.68656	166.784	217.708	180.189	1.26358	0.0203134	1.69222
cpxm1a	ENSDARG00000073716	564830	Both	4368.12	7483.42	4208.96	3.33563	1.67222e-10	9.77671	4311.31	7517.56	4183.95	3.3521	1.17848e-10	9.92868
cpxm1b	ENSDARG00000098158	100330305	Both	913.739	1139.49	846.167	3.15742	2.34277e-14	13.6303	320.071	219.752	206.921	2.73074	3.94527e-08	7.40392
CR356233.1	ENSDARG00000091974	101883078	RefSeqOnly	182.166	104.334	117.33	1.11326	0.0902649	1.04448	157.143	94.0334	97.0249	1.51396	0.0154757	1.81035
CR381540.3	ENSDARG00000104214	110437859	RefSeqOnly	51.3554	92.0596	17.8978	0.455721	0.752372	0.123567	68.4488	134.917	65.3433	2.12312	0.0254584	1.59417
CR381618.1	ENSDARG00000096887	101886729	Both	2284.83	3618.97	2744.32	2.52812	1.02501e-09	8.98927	2253.99	3634.6	2731.55	2.54648	6.76737e-10	9.16958
CR381686.1	ENSDARG00000091249	795699	Both	89.1452	87.9681	61.6479	1.74838	0.00546253	2.26261	88.6943	88.9229	61.3831	1.74597	0.00615361	2.21087
CR457444.7	ENSDARG00000117340	101885221	Ens95only	138.563	168.776	127.273	1.22232	0.0235078	1.62879	26.0298	74.6135	77.2239	1.51217	0.0859054	1.06598
CR855311.1	ENSDARG00000090352	101883708	Both	615.296	330.392	109.375	1.62665	0.0242895	1.61458	597.722	312.763	107.916	1.79481	0.0174056	1.75931
CR925728.1	ENSDARG00000096898	795173	Both	20.3484	47.0527	38.7785	2.89206	0.00425104	2.3715	23.1376	81.7682	51.4826	2.43724	0.00499477	2.30148
CR925761.1	ENSDARG00000098712	110437859	RefSeqOnly	34.8829	41.9383	18.8921	0.266412	0.838338	0.0765808	68.4488	134.917	65.3433	2.12312	0.0254584	1.59417
crabp2a	ENSDARG00000073978	171480	Both	499.989	1366.57	531.961	1.39927	0.0104246	1.98194	493.603	1373.71	527.697	1.41268	0.00984803	2.00665
crabp2b	ENSDARG00000030449	503502	Both	581.382	1230.53	753.695	1.35737	0.00651587	2.18603	574.585	1229.59	741.548	1.3846	0.00510891	2.29167
creb3l1	ENSDARG00000015793	338317	Both	485.454	1032.09	713.922	1.87397	2.0248e-05	4.69362	492.639	1051.74	724.717	1.7797	6.04557e-05	4.21856
creb3l2	ENSDARG00000063563	791169	Both	2301.3	2486.63	2116.91	1.76998	4.47608e-06	5.3491	2523.93	2633.96	2217.71	1.77851	4.07921e-06	5.38942
creb5a	ENSDARG00000099002	101886947	RefSeqOnly	269.374	63.4188	114.347	1.00853	0.312028	0.505807	410.693	351.603	270.284	1.62662	0.00865871	2.06255
creg2	ENSDARG00000000666	492339	Both	1535.82	1394.19	882.956	1.69462	4.407e-05	4.35586	1515.52	1401.3	879.165	1.69945	3.85491e-05	4.41399
cremb	ENSDARG00000102899	550357	Both	567.816	808.079	490.2	1.51142	0.0135378	1.86845	590.01	819.726	514.826	1.39823	0.0208459	1.68098
crfb4	ENSDARG00000068711	797527	Both	525.182	527.808	386.791	1.77772	8.20352e-05	4.086	512.884	527.405	383.15	1.77403	9.20964e-05	4.03576
crim1	ENSDARG00000029668	404210	Both	668.589	299.705	369.887	1.25535	0.0138192	1.85952	473.357	222.818	268.304	1.28133	0.0183965	1.73526
crip2	ENSDARG00000070670	554826	Both	1236.41	3004.21	1919.04	1.76044	7.52395e-05	4.12355	1220.51	3020.31	1910.8	1.77195	7.09361e-05	4.14913
crispld1a	ENSDARG00000077275	100149104	Both	260.653	932.871	502.132	1.91586	0.00143624	2.84277	193.778	670.499	423.742	1.82809	0.00246415	2.60833
crispld1b	ENSDARG00000013293	393442	Both	435.068	1460.68	1065.91	2.41141	2.74657e-05	4.56121	1643.74	3420.98	2282.07	2.42888	6.13999e-07	6.21183
crispld2	ENSDARG00000088595	100535149	RefSeqOnly	46.5106	18.4119	29.8296	1.81657	0.0971993	1.01234	91.5865	62.3482	49.5025	1.91385	0.0132509	1.87775
crk	ENSDARG00000055635	445234	Ens95only	1892.4	2565.39	2128.84	1.16492	0.00198309	2.70266	113.76	55.1935	147.518	0.703436	0.412513	0.384562
crlf1a	ENSDARG00000024365	436923	Both	984.474	1212.12	860.087	1.60948	0.000354682	3.45016	964.068	1217.32	863.324	1.62613	0.000285819	3.54391
crlf3	ENSDARG00000070261	550515	Both	360.457	703.745	551.848	1.23069	0.00576936	2.23887	309.466	697.074	527.697	1.25115	0.00812188	2.09034
crtap	ENSDARG00000018010	406626	Both	2088.13	2653.36	2310.8	2.16361	3.36153e-09	8.47346	2061.18	2667.69	2300.88	2.17077	2.72595e-09	8.56448
cry-dash	ENSDARG00000002396	402986	Both	1004.82	426.543	368.893	1.36797	0.00995415	2.002	992.026	428.261	363.349	1.39687	0.00820875	2.08572
cry1ab	ENSDARG00000011583	554836	Both	550.375	667.944	478.268	1.17516	0.00320135	2.49467	543.734	671.521	476.214	1.19577	0.0026011	2.58484
crybgx	ENSDARG00000036140	553474	Both	19.3794	77.7392	12.9262	3.38407	0.00328683	2.48322	19.2814	78.7019	12.8707	3.38977	0.00420791	2.37593
crygm2d14	ENSDARG00000087301	797707	Both	19.3794	84.8994	30.8239	2.12822	0.0293878	1.53183	18.3173	82.7903	21.7811	2.12881	0.0489043	1.31065
crygm2d3	ENSDARG00000088823	790908	RefSeqOnly	60.0761	120.7	23.8637	1.45571	0.124852	0.903604	41.4549	120.608	26.7314	2.13843	0.0491049	1.30888
csad	ENSDARG00000026348	492476	RefSeqOnly	15.5035	30.6865	34.8012	0.593975	0.701887	0.153733	577.477	1126.36	883.125	1.42055	0.00181896	2.74018
csf1a	ENSDARG00000075343	100004617	Both	213.173	416.314	305.256	2.11596	1.11272e-05	4.95362	209.203	420.084	303.945	2.12193	1.61326e-05	4.7923
csf1b	ENSDARG00000068263	790931	Both	574.599	654.646	610.513	2.88202	2.57355e-09	8.58947	567.836	658.234	607.891	2.89065	2.63298e-09	8.57955
csgalnact1a	ENSDARG00000040535	793671	Both	37.7898	39.8925	81.5343	2.09237	0.0118821	1.92511	1127	749.201	1050.44	3.61227	1.45865e-19	18.836
csgalnact1b	ENSDARG00000089233	101886904	Both	107.556	191.279	200.853	2.52959	2.42985e-06	5.61442	537.95	475.278	538.587	3.21623	5.16031e-15	14.2873
cspg4	ENSDARG00000078227	560393	RefSeqOnly	228.677	104.334	227.699	1.18008	0.0713897	1.14636	252.586	140.028	261.373	1.27377	0.0334091	1.47613
csrnp1a	ENSDARG00000031426	560270	Both	551.344	731.362	360.938	1.38841	0.0019853	2.70217	544.698	734.892	359.388	1.39935	0.00185797	2.73096
csrnp1b	ENSDARG00000038429	322795	RefSeqOnly	134.687	120.7	111.364	0.9259	0.207682	0.6826	13281	16576.5	11108.4	2.29689	2.57151e-07	6.58981
csrp1a	ENSDARG00000006603	378726	Both	1011.6	1239.74	1117.62	1.80249	3.82532e-05	4.41733	998.775	1236.74	1107.87	1.80513	3.92383e-05	4.40629
csrp2	ENSDARG00000011961	393871	Both	816.842	1007.54	442.473	1.40976	0.00230666	2.63702	162.928	169.669	86.1344	1.90545	0.00120649	2.91848
cst14b.1	ENSDARG00000117133	768128	RefSeqOnly	7.75176	33.7552	47.7274	1.53684	0.198926	0.701309	375.022	650.057	784.12	1.44064	0.00209033	2.67978
CT027815.1	ENSDARG00000046054	568883	Ens95only	335.264	589.181	464.348	1.05697	0.0175965	1.75457	41.4549	71.5472	59.403	0.854789	0.289235	0.53875
CT030712.1	ENSDARG00000044355	100534830	RefSeqOnly	14.5345	15.3433	36.7899	1.41468	0.269874	0.568839	137.862	32.7073	93.0647	1.63716	0.0323725	1.48982
ctdsp1	ENSDARG00000040674	553744	Both	1030.98	1327.7	1183.24	1.03834	0.017427	1.75878	1031.55	1359.4	1193.01	1.01861	0.0171376	1.76605
ctdspla	ENSDARG00000071673	751737	Both	953.466	1503.64	1360.23	1.57495	3.62214e-05	4.44103	931.29	1487.16	1330.63	1.58545	2.95995e-05	4.52872
ctdsplb	ENSDARG00000062116	767676	RefSeqOnly	94.9591	65.4646	47.7274	0.850168	0.299964	0.522931	911.044	1236.74	1134.6	1.09821	0.00389296	2.40972
ctgfa	ENSDARG00000042934	321449	Both	27589.5	18491.7	13880.7	2.36985	4.75993e-05	4.3224	27232	18585.9	13822.1	2.37466	4.05413e-05	4.3921
ctgfb	ENSDARG00000104292	100124530	Both	513.554	746.706	519.035	1.84914	5.13479e-05	4.28948	508.064	750.223	516.806	1.83649	5.07745e-05	4.29435
cthrc1a	ENSDARG00000087198	445308	Both	4253.78	4364.65	3444.33	3.7366	1.29184e-19	18.8888	4198.52	4386.86	3429.53	3.74096	7.48813e-20	19.1256
cthrc1b	ENSDARG00000001971	566140	Both	204.453	77.7392	182.955	3.43434	3.54126e-07	6.45084	12745	3836.97	8014.46	4.86856	2.7055e-20	19.5678
ctnna1	ENSDARG00000102441	30741	Both	802.307	1193.71	883.951	1.33258	0.000629024	3.20133	792.464	1199.95	880.155	1.34113	0.000578939	3.23737
ctnnb2	ENSDARG00000023472	324004	Both	2470.87	3163.78	2813.93	1.18372	0.00242932	2.61452	2446.8	3182.83	2802.83	1.19035	0.00213671	2.67025
ctsk	ENSDARG00000040251	550475	Both	1405.98	2841.57	1839.49	1.7708	4.81388e-05	4.3175	1387.29	2855.75	1831.59	1.79677	3.81049e-05	4.41902
ctsla	ENSDARG00000007836	321453	Both	34740.5	37853.9	27963.3	2.0327	4.60542e-06	5.33673	34208	38019.1	27831.3	2.03957	3.62255e-06	5.44099
CU459056.1	ENSDARG00000112644	407706	Both	667.62	2010.99	1235.94	1.73453	0.000629906	3.20072	557.231	1800.94	1132.62	1.7771	0.000573119	3.24175
CU468041.2	ENSDARG00000115511	100331974	Both	53.2933	95.1283	123.296	1.47173	0.021725	1.66304	124.365	149.227	169.299	1.32885	0.00894619	2.04836
CU638870.1	ENSDARG00000097425	110437975	Both	274.219	219.92	243.608	1.20183	0.0201024	1.69675	270.903	220.774	242.562	1.19982	0.0215804	1.66594
CU914487.1	ENSDARG00000046021	101883528	RefSeqOnly	12.5966	12.2746	4.9716	2.15412	1	0	73.2692	53.1493	48.5125	2.37511	0.00619363	2.20805
CU927890.1	ENSDARG00000107130	101883074	Both	94.9591	23.5263	37.7842	2.14216	0.026214	1.58147	93.5146	23.5084	38.612	1.98381	0.0486342	1.31306
CU928117.1	ENSDARG00000059587	565190	RefSeqOnly	51.3554	23.5263	36.7899	-0.237966	0.837765	0.076878	836.811	534.559	531.657	1.0649	0.011859	1.92595
CU984579.1	ENSDARG00000116863	564748	RefSeqOnly	18.4104	27.6179	8.94888	0.514933	0.742347	0.129393	98.3349	206.465	205.931	1.55507	0.00548281	2.261
cx39.4	ENSDARG00000070357	557275	Both	150.19	90.0138	131.25	2.71257	1.21857e-06	5.91415	148.466	89.945	130.687	2.74919	1.48637e-06	5.82787
cx44.2	ENSDARG00000034207	114404	Both	120.152	471.55	334.092	3.62699	4.23915e-09	8.37272	110.868	471.189	327.707	4.17958	1.50418e-10	9.8227
cxadr	ENSDARG00000043658	791793	Both	152.128	301.751	272.444	1.11649	0.0318616	1.49673	150.395	303.564	271.274	1.13889	0.030565	1.51478
cxcl12a	ENSDARG00000037116	352944	Both	24421.9	26817	18540.1	2.31206	6.97584e-10	9.1564	8989.94	10387.6	7567.95	2.23185	1.01913e-09	8.99177
cxcl12b	ENSDARG00000055100	799354	Both	3401.08	4192.8	3269.33	1.22809	0.00297983	2.52581	3357.85	4214.13	3255.29	1.23456	0.00263723	2.57885
cxcl8b.1	ENSDARG00000102299	100536594	Both	1271.29	333.46	395.739	2.80249	0.000166463	3.77868	1263.89	335.25	398	2.81568	0.000148485	3.82832
cxcr3.3	ENSDARG00000070669	799527	Ens95only	211.235	345.735	255.54	1.17544	0.0138366	1.85897	26.0298	26.5747	45.5423	0.597001	0.647574	0.18871
cyb5a	ENSDARG00000098589	406409	Both	612.389	931.848	886.934	1.33933	0.00114366	2.9417	604.471	936.246	884.115	1.34746	0.00109159	2.96194
cyb5r3	ENSDARG00000005891	324560	Both	505.802	1352.25	1125.57	1.08159	0.0361063	1.44242	500.351	1359.4	1120.74	1.08664	0.0355313	1.44939
cybrd1	ENSDARG00000095577	552960	Both	590.103	324.254	247.586	2.19954	3.55969e-05	4.44859	582.297	326.051	246.523	2.20346	3.57343e-05	4.44691
cyfip1	ENSDARG00000044345	336613	Both	2215.07	3418.48	2507.68	1.3892	0.000711487	3.14783	752.937	1746.77	1286.08	1.38592	0.00241548	2.617
cygb1	ENSDARG00000099371	246090	Both	5639.41	10183.8	6171.75	2.95303	1.45736e-08	7.83643	5082.57	9375.74	5669.03	2.92732	2.09949e-08	7.67789
cyp1c1	ENSDARG00000101195	553637	Both	1804.22	4398.4	2866.63	2.1551	8.77845e-07	6.05658	1780.63	4421.61	2854.32	2.16548	8.28924e-07	6.08149
cyp1c2	ENSDARG00000101789	100137725	Both	434.099	1172.23	522.018	3.31107	2.77736e-06	5.55637	429.01	1178.48	519.777	3.32688	3.17309e-06	5.49852
cyp1d1	ENSDARG00000035569	492344	Both	2260.61	3256.86	2430.12	2.63339	3.74399e-12	11.4267	2203.86	3254.37	2383.05	2.70226	3.31794e-12	11.4791
cyp21a2	ENSDARG00000037550	793249	Ens95only	89.1452	54.2129	49.716	2.20547	0.00838037	2.07674	28.922	23.5084	26.7314	2.47818	0.0819941	1.08622
cyp26b1	ENSDARG00000077121	324188	Both	6214.97	5593.13	4223.87	1.02513	0.00936242	2.02861	6116.05	5612.36	4192.86	1.03	0.00817501	2.08751
cyp27a1.4	ENSDARG00000055159	322341	Both	51.3554	109.449	112.358	1.53364	0.0279172	1.55413	54.9519	110.387	112.866	1.60014	0.0201066	1.69666
cyp27a7	ENSDARG00000033802	402831	Both	245.149	718.065	563.78	1.83239	0.000292914	3.53326	241.981	723.648	560.369	1.8531	0.000277942	3.55605
cyp2aa1	ENSDARG00000099003	572000	Both	279.063	304.82	251.563	1.51803	0.00171473	2.7658	275.723	305.609	250.483	1.52236	0.00181896	2.74018
cyp2aa2	ENSDARG00000104811	768294	Both	13.5656	86.9452	63.6365	2.24107	0.0200905	1.69701	13.497	86.8787	63.3632	2.23608	0.023173	1.63502
cyp2ad2	ENSDARG00000021172	259306	Both	576.537	241.401	862.076	1.63711	0.0244085	1.61246	560.124	237.128	851.443	1.66259	0.0221056	1.6555
cyp2ad3	ENSDARG00000022650	569245	Both	6236.29	10356.7	8153.43	1.9304	3.22137e-06	5.49196	6022.53	9891.91	8015.45	1.93943	2.56165e-06	5.59148
cyp2ad6	ENSDARG00000042956	799957	Both	65.89	82.8536	170.029	1.96552	0.00271832	2.5657	71.341	101.188	226.722	2.05057	0.00181896	2.74018
cyp2j20	ENSDARG00000094057	797309	Ens95only	113.369	62.396	44.7444	1.59746	0.026826	1.57144	205.347	107.321	81.1841	1.16971	0.0878781	1.05612
cyp2k8	ENSDARG00000101190	561462	Both	70.7348	55.2358	30.8239	1.79179	0.0241304	1.61744	70.377	55.1935	30.6916	1.81405	0.025801	1.58836
cyp2p6	ENSDARG00000042978	393108	Both	442.819	424.497	651.28	1.35799	0.00264181	2.5781	436.723	427.239	646.503	1.37475	0.00231968	2.63457
cyp2x7	ENSDARG00000044002	402847	Both	105.618	47.0527	36.7899	2.10458	0.00932419	2.03039	120.509	62.3482	48.5125	2.05366	0.00756875	2.12098
cyp3c1	ENSDARG00000015575	324340	Both	3072.6	3583.16	2697.59	1.98463	1.23684e-06	5.90769	3030.07	3590.65	2684.03	1.98988	1.11153e-06	5.95408
cyp46a1.2	ENSDARG00000004262	393433	Both	240.305	120.7	105.398	1.78494	0.00172717	2.76267	284.4	132.873	122.766	1.65262	0.0042715	2.36942
cyp46a1.4	ENSDARG00000113820	393451	Both	66.8589	125.815	100.426	1.34965	0.0443325	1.35328	80.0177	135.94	117.816	1.28015	0.0473808	1.3244
cyr61	ENSDARG00000023062	403033	Both	22054.7	29255.5	22997.6	1.98682	0.00634829	2.19734	21662.6	29323.1	22811.8	2.00115	0.00590186	2.22901
cyr61l1	ENSDARG00000035422	550346	Both	943.777	513.488	435.512	4.55919	9.17934e-17	16.0372	930.326	516.162	433.642	4.56128	6.66432e-17	16.1762
cyr61l2	ENSDARG00000099985	553273	Both	405.029	211.737	359.944	2.78488	6.08338e-09	8.21585	402.98	212.597	358.398	2.7661	8.31208e-09	8.08029
cyt1	ENSDARG00000092947	30327	Both	4147.19	1475	3288.22	1.17897	0.0467855	1.32989	4197.55	1520.89	3375.08	1.20327	0.0396468	1.40179
cyt1l	ENSDARG00000036832	792062	Both	1621.09	853.086	1708.24	1.84651	0.001325	2.87778	1497.2	812.571	1594.97	1.86417	0.00121008	2.91719
cyth1a	ENSDARG00000076742	321938	Both	1398.22	1594.68	1172.3	1.33819	0.000270232	3.56826	1349.7	1486.14	1077.17	1.31237	0.000328274	3.48376
cyth3a	ENSDARG00000007807	100002190	Both	279.063	778.415	386.791	1.62097	0.00242882	2.6146	260.298	746.135	373.249	1.64442	0.00246849	2.60757
CYTL1	ENSDARG00000110744	101886995	Both	56.2003	84.8994	155.114	3.46497	2.90108e-06	5.53744	790.536	329.117	544.528	3.75034	7.22051e-14	13.1414
daam2	ENSDARG00000028393	798465	RefSeqOnly	117.245	45.0069	57.6706	1.26704	0.0913762	1.03917	151.359	71.5472	107.916	1.33309	0.0357749	1.44642
dachb	ENSDARG00000034785	192122	Both	596.886	484.847	418.609	1.89766	2.71201e-06	5.56671	775.111	587.709	497.005	1.93825	1.68299e-06	5.77392
dact1	ENSDARG00000101635	405799	RefSeqOnly	36.8209	149.341	106.392	1.35204	0.0832348	1.0797	1482.74	1928.71	1242.51	1.879	2.89563e-07	6.53826
dap1b	ENSDARG00000109678	101885164	Both	10023	5364.01	5276.86	1.37029	0.00790593	2.10205	4373.98	2467.35	2817.68	1.1441	0.0407547	1.38982
dapk3	ENSDARG00000074447	562194	RefSeqOnly	41.6657	18.4119	25.8523	1.28567	0.287933	0.540708	1034.45	2011.5	816.792	2.00993	2.73437e-05	4.56314
dars	ENSDARG00000070043	324025	Ens95only	338.171	576.907	600.569	1.10913	0.0147989	1.82977	1247.5	1331.8	1477.16	0.824672	0.0446272	1.3504
dcn	ENSDARG00000012066	64698	Both	6819.61	15899.7	8975.73	2.15957	2.73522e-06	5.56301	6724.38	15971.4	8937.19	2.17007	2.45241e-06	5.61041
ddah1	ENSDARG00000103042	406561	RefSeqOnly	4.84485	4.09154	9.9432	0.14916	1	0	94.4787	504.919	345.528	1.60101	0.0192728	1.71505
ddb2	ENSDARG00000041140	100004133	Both	891.452	299.705	344.035	1.26619	0.035722	1.44706	870.553	276.99	309.886	1.27402	0.0451948	1.34491
ddit3	ENSDARG00000059836	561924	RefSeqOnly	676.341	743.637	580.683	1.28826	0.114207	0.942306	3535.24	4013.8	2304.84	1.71625	0.00646424	2.18948
ddr2a	ENSDARG00000100693	556380	Both	1012.57	1079.14	885.939	1.83859	8.703e-06	5.06033	1039.27	1138.62	912.827	1.84511	6.90694e-06	5.16071
ddr2b	ENSDARG00000058695	559428	Both	235.46	176.959	170.029	2.80689	2.00559e-07	6.69776	265.119	216.686	185.139	2.90233	1.14563e-07	6.94095
ddx21	ENSDARG00000063626	799650	Both	4207.27	2053.95	2802.99	1.10586	0.0309322	1.50959	4152.24	2064.65	2791.94	1.10889	0.0282805	1.54851
ddx3xa	ENSDARG00000020573	566947	Both	4825.47	4186.67	3095.32	1.20451	0.00124118	2.90616	5241.64	4400.15	3247.37	1.20459	0.00126818	2.89682
ddx5	ENSDARG00000038068	322206	Both	8809.88	19891	9910.39	1.21815	0.0126543	1.89776	8510.79	18668.7	9446.07	1.22968	0.00966108	2.01497
degs1	ENSDARG00000007347	327075	Both	1219.93	1050.5	903.837	1.00504	0.0167682	1.77551	1203.16	1055.83	899.956	1.01083	0.0154031	1.81239
dennd4a	ENSDARG00000062721	558211	Both	1714.11	2401.73	1649.58	1.71744	0.00153062	2.81513	4208.16	7328.47	4292.86	1.75854	0.000228646	3.64084
deptor	ENSDARG00000040930	768177	Both	482.547	499.168	512.075	1.15402	0.00490641	2.30924	514.812	573.399	567.299	1.15472	0.00411638	2.38548
dhdhl	ENSDARG00000028336	406433	Both	315.884	298.682	302.273	1.17572	0.0171077	1.76681	312.358	300.498	300.975	1.18108	0.0171376	1.76605
dhps	ENSDARG00000003270	406329	RefSeqOnly	253.87	377.444	289.347	0.876029	0.0730529	1.13636	235.233	349.559	262.363	1.05957	0.0255474	1.59265
dhrs1	ENSDARG00000054300	368670	Both	707.348	726.248	627.416	1.35952	0.00125492	2.90138	697.985	730.803	623.732	1.36714	0.00115778	2.93637
dhrs11b	ENSDARG00000031299	791770	Both	135.656	295.614	229.688	1.11845	0.0388324	1.41081	134.005	297.432	228.702	1.13073	0.0395086	1.40331
dhrs13a.1	ENSDARG00000026322	492491	Both	226.739	185.142	154.12	1.1202	0.0200738	1.69737	224.628	183.978	143.557	1.18414	0.0168769	1.77271
dhrs3a	ENSDARG00000044982	445083	Both	736.417	960.489	666.195	1.57813	0.00184363	2.73433	726.907	963.842	663.334	1.59035	0.00172451	2.76333
dhrs3b	ENSDARG00000044803	450050	Both	287.784	417.337	332.103	1.22828	0.00433904	2.36261	284.4	420.084	324.737	1.23152	0.0047636	2.32207
dhrs4	ENSDARG00000021135	393539	Both	610.451	768.186	337.075	1.05743	0.0332989	1.47757	563.98	668.455	293.055	1.09537	0.0293142	1.53292
dio1	ENSDARG00000042112	799937	Both	157.942	299.705	243.608	1.71321	0.000506656	3.29529	156.179	305.609	242.562	1.74078	0.00051117	3.29143
dkk1a	ENSDARG00000014103	799377	Both	105.618	115.586	293.324	1.92881	0.00157939	2.80151	105.083	116.52	292.065	1.93202	0.00172473	2.76328
dkk2	ENSDARG00000076420	792404	Both	316.853	406.085	321.165	1.22973	0.0028683	2.54238	313.322	407.819	319.786	1.23965	0.00284052	2.5466
dkk3b	ENSDARG00000070683	100038765	Both	691.845	1282.7	849.15	1.06046	0.029244	1.53396	683.524	1309.31	850.453	1.06915	0.0283055	1.54813
dlc1	ENSDARG00000079317	567965	RefSeqOnly	47.4795	112.517	123.296	1.14726	0.14112	0.850413	2924.98	3510.92	2520.67	2.277	2.14109e-10	9.66937
dlx1a	ENSDARG00000013125	30568	Both	283.908	377.444	476.279	1.14803	0.0129585	1.88744	500.351	713.427	884.115	1.02295	0.0248468	1.60473
dlx3b	ENSDARG00000014626	30585	Both	1470.9	2835.44	2721.45	1.81022	8.98918e-05	4.04628	1451.89	2849.62	2710.76	1.82001	8.41918e-05	4.07473
dlx4a	ENSDARG00000011956	30561	Both	1619.15	3468.6	4455.55	2.76595	3.66042e-08	7.43647	1598.42	3488.44	4444.34	2.77505	3.30688e-08	7.48058
dlx4b	ENSDARG00000071560	30581	Both	254.839	578.953	431.535	1.35879	0.0143962	1.84175	251.622	582.598	427.702	1.38852	0.0128754	1.89024
dlx5a	ENSDARG00000042296	30569	Both	661.807	1747.09	1574.01	1.8298	0.000103897	3.9834	653.638	1755.97	1567.25	1.83949	0.000101075	3.99536
dmgdh	ENSDARG00000025703	100141496	Both	82.3624	66.4875	80.5399	1.38832	0.0263118	1.57985	225.592	534.559	508.886	2.0638	2.4908e-05	4.60366
dnajb1a	ENSDARG00000099383	445177	Both	441.85	333.46	519.035	1.17827	0.0450191	1.3466	427.082	326.051	503.936	1.17617	0.0443269	1.35333
dnajb1b	ENSDARG00000041394	327244	Both	18644.9	7920.19	23912.4	2.28039	0.000737286	3.13236	33593.9	9502.48	27764	2.34274	0.000548029	3.2612
dnajb4	ENSDARG00000038978	445061	Both	417.626	161.616	290.342	1.22782	0.030199	1.52001	412.621	162.514	289.095	1.23004	0.0294644	1.5307
dnm3a	ENSDARG00000032238	557996	Ens95only	296.505	384.605	236.648	1.25875	0.00755622	2.1217	509.992	692.985	484.135	0.968161	0.0398229	1.39987
dock10	ENSDARG00000075327	100000949	Both	483.516	824.445	595.598	1.07732	0.0116837	1.93242	219.808	483.454	380.179	1.14526	0.0203172	1.69214
dock9b	ENSDARG00000016311	100151488	Both	2066.81	2207.38	1605.83	2.00793	3.76668e-07	6.42404	1770.03	1960.39	1455.37	1.94765	3.5652e-07	6.44792
dpep2	ENSDARG00000079216	100534995	RefSeqOnly	49.4175	52.1671	55.6819	1.50299	0.0713897	1.14636	416.477	429.283	323.747	1.72096	0.000774329	3.11107
dph2	ENSDARG00000078077	562538	RefSeqOnly	200.577	201.508	184.944	0.98281	0.0427425	1.36914	141.718	159.448	152.468	1.10103	0.0344303	1.46306
dpp7	ENSDARG00000027750	503737	Both	1009.67	1123.13	863.07	1.29041	0.000492724	3.3074	1002.63	1127.38	856.394	1.29403	0.000458518	3.33864
dpt	ENSDARG00000056178	555282	Both	368.209	360.055	332.103	3.12358	2.08942e-11	10.68	363.454	361.824	330.677	3.13661	3.24719e-11	10.4885
dse	ENSDARG00000017988	568713	Ens95only	287.784	377.444	260.512	1.76049	0.000429489	3.36705	58.8082	120.608	89.1045	1.07519	0.196107	0.707507
DSG2	ENSDARG00000062750	100534918	Ens95only	131.78	172.867	115.341	1.23637	0.019112	1.71869	34.7065	22.4862	18.811	-0.0446884	0.979622	0.00894125
dusp1	ENSDARG00000100515	406340	Both	8444.57	9094.47	5452.85	1.74968	0.000153809	3.81302	8326.66	9131.46	5421.52	1.7594	0.000129412	3.88802
dusp2	ENSDARG00000098108	445057	Both	6212.07	6579.19	5138.65	1.51839	0.0354309	1.45062	6108.34	6587.45	5092.82	1.52929	0.0335437	1.47439
dusp5	ENSDARG00000019307	114436	Both	5404.91	5695.42	4157.25	1.96786	0.00562848	2.24961	5335.15	5724.79	4139.4	1.97502	0.00516997	2.28651
dusp6	ENSDARG00000070914	353314	Both	4485.36	5582.9	3809.24	1.55	1.45047e-05	4.83849	4427	5611.34	3792.88	1.55674	1.21033e-05	4.9171
dusp8a	ENSDARG00000009299	393854	Both	855.601	1069.94	671.166	1.10495	0.0428294	1.36826	1175.2	1425.83	917.777	1.08241	0.0292976	1.53317
dut	ENSDARG00000106529	449835	Ens95only	3323.57	3562.71	3395.6	1.49966	0.000587435	3.23104	187.029	672.543	631.652	-0.312176	0.734184	0.134195
dvl2	ENSDARG00000056184	323630	Both	1640.47	2493.79	1631.68	1.2029	0.0022645	2.64503	975.637	959.754	597.99	1.21759	0.00494425	2.3059
dzip1	ENSDARG00000000943	402875	Both	884.67	1105.74	841.195	1.46451	0.000356082	3.44845	873.446	1117.16	839.563	1.47014	0.000328274	3.48376
ebf1b	ENSDARG00000069196	557777	Both	701.534	1291.9	568.751	1.29949	0.0129987	1.8861	874.41	1520.89	679.175	1.24701	0.0178966	1.74723
ece1	ENSDARG00000061737	777750	Both	482.547	974.809	783.524	1.57443	0.00110218	2.95775	197.634	484.476	422.752	1.71582	0.00131948	2.8796
ece2b	ENSDARG00000102142	793465	Both	220.925	249.584	196.875	1.16431	0.01296	1.88739	418.406	311.741	335.627	1.29127	0.00184363	2.73433
ecm1b	ENSDARG00000105239	100332249	Both	1167.61	1247.92	1145.46	2.12164	4.90504e-07	6.30936	1769.06	1754.95	1624.67	2.20097	3.89592e-07	6.40939
ecm2	ENSDARG00000071549	558224	Both	749.983	987.084	854.121	1.79617	4.69463e-05	4.3284	1792.2	1818.32	1520.72	1.89511	3.25878e-06	5.48694
ecrg4a	ENSDARG00000056087	791762	Both	6932.98	2612.45	4373.02	2.61988	1.2935e-05	4.88823	6842.96	2625.78	4355.23	2.62225	1.10224e-05	4.95772
edem1	ENSDARG00000025094	394164	Both	443.788	911.39	525.995	1.25045	0.00919505	2.03645	438.651	911.715	523.737	1.26309	0.00848078	2.07156
edn3b	ENSDARG00000086669	100148183	Both	215.111	237.309	175.995	4.14	1.1722e-13	12.931	49.1675	32.7073	53.4627	2.79666	0.0100207	1.9991
ednraa	ENSDARG00000011876	114550	Both	7746.92	6172.08	5046.18	4.04458	6.35315e-25	24.197	7983.45	6455.6	5137.37	4.06445	2.20134e-25	24.6573
eef1da	ENSDARG00000102291	565501	Both	17375.6	12037.3	11295.5	1.49295	0.00181148	2.74197	16581	11644.8	10813.3	1.49519	0.00187108	2.72791
eef1g	ENSDARG00000056119	195822	Both	65851.2	45135.8	52242.6	1.09868	0.02077	1.68256	64996.5	45365	52020.2	1.1027	0.0188179	1.72543
eef2b	ENSDARG00000100371	326929	Both	51428.1	46866.5	59416.6	1.04213	0.0152012	1.81812	50561.5	47055.5	59095.1	1.04746	0.0136112	1.86611
efemp2a	ENSDARG00000094324	494044	Ens95only	2540.64	4164.16	2493.76	2.07997	2.57307e-06	5.58955	0	16.3536	17.8209	0.205745	0.942873	0.0255468
efhd2	ENSDARG00000055759	571114	Both	1061.02	1154.84	955.542	1.05916	0.0121818	1.91429	1108.68	1441.16	1122.72	1.07764	0.0063774	2.19536
egfl7	ENSDARG00000100657	678640	Both	289.722	473.596	255.54	1.61964	0.000368701	3.43333	286.328	483.454	258.403	1.57569	0.000624922	3.20417
egfra	ENSDARG00000013847	378478	Both	948.622	1130.29	817.331	1.30294	0.00104536	2.98073	538.914	750.223	617.792	1.34302	0.00124837	2.90366
egr1	ENSDARG00000037421	30498	Ens95only	29149.5	45227.9	32397.9	1.54502	0.0035391	2.45111	6567.23	4174.27	5551.21	0.993594	0.143785	0.842287
ehbp1	ENSDARG00000043643	560857	Both	838.159	1250.99	831.252	1.09728	0.00631119	2.19989	831.991	1250.03	826.692	1.11772	0.00515454	2.28781
ehbp1l1b	ENSDARG00000079895	100331563	Ens95only	251.932	308.911	272.444	1.16117	0.0100803	1.99653	100.263	47.0167	73.2637	0.412958	0.650176	0.186969
ehd1b	ENSDARG00000014793	447839	Both	682.155	1491.37	877.985	1.72345	0.000339721	3.46888	672.92	1498.4	874.215	1.73313	0.000332842	3.47776
ehd2b	ENSDARG00000040362	337401	Both	688.938	993.221	670.172	1.03124	0.0255101	1.59329	681.596	998.594	667.294	1.03638	0.0247014	1.60728
ehd4	ENSDARG00000054302	569546	RefSeqOnly	113.369	43.984	128.267	0.772294	0.328287	0.483746	425.154	379.2	495.025	1.08826	0.0418321	1.37849
ehhadh	ENSDARG00000070029	100000859	Both	251.932	481.779	420.597	1.43794	0.00284399	2.54607	248.73	484.476	417.801	1.44573	0.00289379	2.53853
eif1b	ENSDARG00000012688	322237	Both	24785.3	20216.3	17070.5	1.32134	0.0017096	2.76711	24367.8	20043.4	16855.6	1.32605	0.00144434	2.84033
eif2s3	ENSDARG00000008292	327341	Both	7383.55	7047.67	6516.78	1.12441	0.00275904	2.55924	7287.39	7083.17	6488.79	1.1302	0.00230879	2.63662
eif4a1b	ENSDARG00000003032	399484	Both	6686.86	7611.28	8268.77	1.07152	0.00382515	2.41735	5782.48	6776.54	7378.85	1.07922	0.00364147	2.43872
eif4ebp3	ENSDARG00000054916	492482	Both	2940.82	882.749	1276.71	2.03459	0.000780853	3.10743	2876.78	868.787	1239.54	2.05865	0.000775801	3.11025
eif4ebp3l	ENSDARG00000041607	324490	Both	2210.22	1000.38	1648.58	1.30262	0.0153016	1.81526	2179.76	1005.75	1641.5	1.30522	0.0143458	1.84328
elk3	ENSDARG00000018688	557074	Both	479.64	850.017	811.365	1.55734	0.000842544	3.07441	1271.61	1556.66	1414.78	1.6165	1.10114e-05	4.95816
elmsan1b	ENSDARG00000053864	560411	RefSeqOnly	5418.48	7979.52	4821.46	1.20856	0.0527202	1.27802	5246.46	7964.22	4750.26	1.22197	0.0490582	1.30929
elnb	ENSDARG00000069017	558461	Both	158.911	72.6248	104.404	1.99044	0.000768165	3.11455	241.017	101.188	183.159	2.34836	2.21765e-05	4.65411
emd	ENSDARG00000095774	558212	Both	462.199	1076.07	1137.5	1.30594	0.0150993	1.82104	458.896	1071.16	1125.69	1.34329	0.0123609	1.90795
emid1	ENSDARG00000076119	797252	Both	584.289	1867.79	1455.68	1.70761	0.00196302	2.70708	3574.76	7820.1	5159.15	1.70812	3.98714e-05	4.39934
emilin1a	ENSDARG00000024537	566473	Both	392.433	1108.81	594.604	2.48555	1.14133e-06	5.94259	383.699	1110	589.08	2.4979	1.1973e-06	5.9218
emilin2a	ENSDARG00000061196	100001725	Both	147.283	337.552	260.512	1.59308	0.0017096	2.76711	861.877	1287.85	1198.95	1.66861	7.7887e-05	4.10853
emilin2b	ENSDARG00000102178	571391	Both	537.778	888.887	1000.29	2.60901	8.40078e-07	6.07568	531.202	891.273	993.021	2.61903	8.06753e-07	6.09326
emp2	ENSDARG00000044588	445506	Both	3318.72	7647.08	3894.75	2.12108	1.83798e-06	5.73566	3275.9	7686.21	3878.03	2.13166	1.65957e-06	5.78
emp3b	ENSDARG00000101461	560722	Both	278.094	79.785	84.5172	2.66851	0.000222618	3.65244	279.58	82.7903	88.1145	2.38616	0.000754973	3.12207
enam	ENSDARG00000092730	555617	Both	2835.21	7263.5	2549.44	1.53703	0.00434877	2.36163	2798.69	7300.88	2536.51	1.55137	0.00396819	2.40141
enox2	ENSDARG00000078942	566327	Both	741.262	521.671	568.751	1.24465	0.00153787	2.81308	726.907	531.493	560.369	1.24104	0.00138692	2.85795
enpep	ENSDARG00000057064	504088	Both	102.711	144.227	184.944	2.30614	2.14575e-05	4.66842	102.191	145.139	184.149	2.30019	3.09237e-05	4.50971
enpp1	ENSDARG00000005789	562399	Both	899.204	1462.72	1007.25	1.80121	2.10572e-05	4.6766	873.446	1436.05	987.08	1.8313	1.56247e-05	4.80619
enpp2	ENSDARG00000011257	100332039	Both	840.097	1417.72	1170.32	1.76773	0.00017224	3.76387	882.122	1454.45	1188.06	1.76	0.000166559	3.77843
enpp6	ENSDARG00000040469	791915	Both	249.994	543.152	245.597	2.5207	1.63807e-06	5.78567	54.9519	145.139	74.2538	2.15987	0.00317447	2.49833
entpd1	ENSDARG00000045066	445151	Both	2835.21	4794.26	3667.05	1.46811	0.00033148	3.47954	2819.9	4818.19	3652.3	1.47635	0.000291393	3.53552
entpd6	ENSDARG00000008757	550560	RefSeqOnly	127.904	391.765	359.944	1.14817	0.0696646	1.15699	384.663	735.914	637.593	1.0983	0.0156975	1.80417
epas1a	ENSDARG00000008697	566886	Ens95only	1807.13	1275.54	1531.25	1.43869	0.0120649	1.91847	598.686	395.554	466.314	1.25656	0.0502908	1.29851
epas1b	ENSDARG00000057671	555192	Both	6959.14	3079.91	4977.57	2.50266	4.79902e-06	5.31885	2270.38	757.378	1515.77	2.50952	8.47676e-05	4.07177
epd	ENSDARG00000103498	30199	Both	41302.3	38889	60360.2	3.70588	0.0270043	1.56857	40766.6	39088.3	60104	3.70954	0.0266685	1.574
epha2b	ENSDARG00000022727	568718	RefSeqOnly	143.408	77.7392	119.318	1.03897	0.130084	0.885775	352.849	249.393	238.602	1.12054	0.027821	1.55563
epha4a	ENSDARG00000054454	64271	Both	1655.97	2527.55	1568.04	1.09444	0.00603722	2.21916	1632.17	2540.95	1560.32	1.10932	0.00521039	2.28313
ephb4b	ENSDARG00000027112	30691	Both	859.476	1154.84	787.502	1.46755	0.00210548	2.67665	187.029	354.669	245.533	1.32266	0.0186799	1.72862
ephx2	ENSDARG00000040255	494099	Both	62.0141	70.579	64.6308	1.68159	0.00873948	2.05851	131.113	137.984	176.229	1.61939	0.00176601	2.75301
epn2	ENSDARG00000008377	560542	Both	1858.48	2692.23	1855.4	1.07399	0.00831243	2.08027	1816.3	2682	1822.68	1.07954	0.00805501	2.09393
epyc	ENSDARG00000056950	550602	Both	30798.7	17349.1	19744.2	4.90065	3.3122e-23	22.4799	28930.7	15759.8	18363.5	5.01486	4.80528e-23	22.3183
ero1a	ENSDARG00000015228	393321	Both	119.183	201.508	147.159	1.302	0.0137721	1.861	100.263	199.31	144.547	1.25166	0.028541	1.54453
errfi1a	ENSDARG00000104039	798009	Both	1314.89	1895.4	1252.84	1.9219	1.18189e-06	5.92742	288.256	205.443	150.488	1.70102	0.00207083	2.68386
esyt1b	ENSDARG00000014239	571083	RefSeqOnly	19.3794	39.8925	53.6933	-0.327831	0.780806	0.107457	376.951	697.074	418.791	1.0512	0.0326564	1.48603
esyt2a	ENSDARG00000030824	570012	Both	1200.55	1373.73	1027.13	1.48827	5.36788e-05	4.2702	1187.73	1380.86	1022.72	1.48644	5.11265e-05	4.29135
etf1b	ENSDARG00000043976	266989	RefSeqOnly	2865.24	2779.18	2206.4	0.978246	0.0210189	1.67739	2690.71	2641.11	2070.2	1.00649	0.015404	1.81237
ets1	ENSDARG00000024431	280651	Both	388.557	316.071	264.489	2.7942	6.03134e-10	9.21959	898.511	427.239	420.771	2.76249	3.93808e-08	7.40472
ets2	ENSDARG00000103980	326672	Both	4072.58	3250.73	2268.04	1.61436	0.00824716	2.0837	987.206	1303.18	810.851	1.64033	0.010853	1.96445
etv4	ENSDARG00000018303	30700	Both	1038.74	1236.67	1170.32	1.25446	0.0108396	1.96499	1026.73	1253.1	1169.25	1.26119	0.00993783	2.00271
eva1ba	ENSDARG00000102701	100004969	Both	750.952	612.708	443.467	2.74215	3.84609e-09	8.41498	442.507	413.951	287.115	2.95231	7.45924e-11	10.1273
eva1bb	ENSDARG00000100698	798034	Both	220.925	340.621	612.501	3.57153	1.1132e-07	6.95343	214.023	343.426	605.911	3.65485	9.70904e-08	7.01282
exoc3l1	ENSDARG00000051899	567832	Both	574.599	1005.5	617.473	2.40965	1.71173e-07	6.76656	568.8	1014.95	627.692	2.32732	3.27701e-07	6.48452
extl2	ENSDARG00000063191	558373	Both	395.34	457.229	455.399	1.49939	0.000355967	3.44859	349.957	455.858	433.642	1.69941	0.000122436	3.91209
eya2	ENSDARG00000018984	447819	Both	2283.86	2988.87	1665.49	2.21952	9.1174e-08	7.04013	2253.99	3002.94	1658.33	2.22862	7.78624e-08	7.10867
ezh1	ENSDARG00000037894	664754	Both	250.963	453.138	377.842	1.14807	0.013292	1.87641	237.161	436.438	344.538	1.15526	0.0141499	1.84925
f10	ENSDARG00000088581	282670	Both	835.252	932.871	1856.4	1.98696	0.000568036	3.24562	824.278	937.268	1848.42	2.00397	0.000484247	3.31493
f2rl2	ENSDARG00000090524	100148468	Both	884.67	924.688	633.382	2.58758	1.01232e-06	5.99468	234.269	536.604	335.627	2.66181	1.80602e-05	4.74328
fabp11a	ENSDARG00000017299	447944	Both	3396.24	5366.05	2985.94	2.29198	8.05914e-07	6.09371	3352.06	5393.63	2966.19	2.29913	7.45938e-07	6.1273
FADS6	ENSDARG00000091503	100538024	RefSeqOnly	258.715	204.577	357.955	0.704642	0.199977	0.69902	139.79	114.475	210.881	1.36299	0.0162047	1.79036
fah	ENSDARG00000101762	322372	Both	1780.97	807.056	1554.12	2.18901	0.000111554	3.95251	4755.75	3758.27	5273.01	2.01897	4.83119e-05	4.31595
fam107b	ENSDARG00000026865	386641	Both	1451.52	1935.3	1307.53	1.00101	0.0115878	1.936	1435.5	1945.06	1301.92	1.00918	0.010539	1.9772
fam114a1	ENSDARG00000008287	560911	Both	388.557	607.593	439.49	1.67687	8.61182e-05	4.06491	433.831	718.538	498.985	1.63578	0.000113461	3.94515
fam120a	ENSDARG00000075021	108191614	Ens95only	1493.18	1873.92	1847.45	1.12633	0.00230666	2.63702	325.855	69.503	163.358	0.435638	0.65378	0.184568
FAM124A	ENSDARG00000075264	556683	Both	300.381	381.536	212.785	1.02017	0.0378636	1.42178	263.191	360.802	186.129	1.16104	0.0192728	1.71505
fam129ab	ENSDARG00000023053	561414	Both	166.663	351.872	174.006	1.86497	0.000293621	3.53221	146.538	342.404	159.398	1.84763	0.000689903	3.16121
fam129ba	ENSDARG00000062970	563073	Both	251.932	743.637	821.309	1.6844	0.0015371	2.8133	248.73	748.179	817.782	1.69768	0.00147029	2.8326
fam129bb	ENSDARG00000008026	556540	Both	363.364	433.703	333.097	1.58339	8.8541e-05	4.05286	183.173	167.625	138.607	1.38006	0.00479745	2.31899
fam160b1	ENSDARG00000060168	100038786	RefSeqOnly	35.8519	13.2975	24.858	-0.0698161	0.965335	0.0153219	1007.45	1159.06	914.807	1.0284	0.00532599	2.2736
fam167b	ENSDARG00000100426	556719	RefSeqOnly	15.5035	18.4119	21.875	0.761355	0.624635	0.204373	482.034	271.879	549.478	1.61735	0.00158519	2.79992
fam169ab	ENSDARG00000004177	553309	RefSeqOnly	8.72073	5.11442	19.8864	-0.25151	0.899313	0.0460891	2296.41	1507.6	1300.93	2.60807	7.56256e-11	10.1213
fam189a2	ENSDARG00000099946	503960	RefSeqOnly	106.587	187.188	138.211	1.13122	0.0673125	1.1719	178.353	311.741	220.781	1.05834	0.0362059	1.44122
fam198a	ENSDARG00000076862	100534770	Both	1081.37	1866.76	1223.01	1.98837	2.29817e-05	4.63862	1113.5	1952.22	1250.43	2.01266	1.65861e-05	4.78026
fam198b	ENSDARG00000077054	566369	Both	131.78	151.387	110.37	1.50979	0.00456131	2.34091	140.754	166.603	115.836	1.32111	0.0137436	1.8619
fam20a	ENSDARG00000079486	564308	Both	93.0211	75.6935	89.4888	1.94274	0.000948269	3.02307	482.998	273.923	261.373	1.60511	0.00065331	3.18488
fam43a	ENSDARG00000043009	334166	Both	323.636	700.676	443.467	1.22699	0.0155162	1.80921	320.071	704.228	441.563	1.23525	0.0153123	1.81496
fam69c	ENSDARG00000105040	336057	Ens95only	572.661	1525.12	806.394	1.23674	0.0145037	1.83852	133.041	261.658	122.766	0.974249	0.110382	0.957101
fank1	ENSDARG00000039657	100005699	RefSeqOnly	47.4795	12.2746	29.8296	1.01378	0.391025	0.407795	203.418	249.393	200.98	1.10843	0.0378424	1.42202
fap	ENSDARG00000078468	565888	Both	416.657	2483.56	1213.07	1.55352	0.0158218	1.80075	858.021	3469.02	1632.59	1.50437	0.00722234	2.14132
fblim1	ENSDARG00000071558	768160	Both	729.634	778.415	513.069	1.35812	0.00359491	2.44431	720.159	781.908	508.886	1.36843	0.00341467	2.46665
fbln2	ENSDARG00000015156	553503	Both	2125.92	5028.5	4233.82	1.63737	0.000590516	3.22877	2097.81	5060.43	4213.65	1.65023	0.000533302	3.27303
fbln5	ENSDARG00000039273	449806	Both	3278.03	5271.95	4152.28	2.78137	5.86025e-12	11.2321	3235.41	5299.6	4135.44	2.78707	4.85559e-12	11.3138
fbln7	ENSDARG00000089519	100000083	Both	968.97	1073.01	1279.69	2.10912	9.18826e-06	5.03677	901.404	1014.95	1164.3	2.14359	5.0293e-06	5.29849
fbn2b	ENSDARG00000098237	571786	Both	316.853	290.499	342.046	1.28484	0.0103064	1.98689	4486.77	8696.05	6426.42	2.30369	3.2921e-07	6.48253
fbp1a	ENSDARG00000021366	335231	Both	925.366	1021.86	1174.29	1.78211	4.88823e-05	4.31085	915.865	1027.21	1169.25	1.78344	4.37532e-05	4.35899
fbxl7	ENSDARG00000062251	569430	Both	283.908	431.657	305.256	1.51061	0.000930808	3.03114	280.544	434.393	303.945	1.52222	0.000904309	3.04368
fermt2	ENSDARG00000020242	553051	Both	480.609	122.746	219.745	1.7566	0.0136178	1.86589	2615.52	1766.19	1707.84	2.17342	1.67382e-07	6.77629
fgf10a	ENSDARG00000030932	359830	Both	518.399	975.832	858.098	1.58193	0.000529321	3.27628	510.956	978.152	847.483	1.61865	0.00042862	3.36793
fgf10b	ENSDARG00000100475	751792	Ens95only	70.7348	45.0069	76.5627	1.55638	0.0261684	1.58222	22.1736	5.11051	12.8707	1.69529	0.388375	0.410748
fgf16	ENSDARG00000042233	692065	Ens95only	129.842	233.218	135.228	1.32092	0.0183351	1.73672	2.8922	1.0221	4.95025	-0.595533	1	0
fgf23	ENSDARG00000045854	494456	Ens95only	54.2623	1.02288	106.392	2.9295	0.0418941	1.37785	43.3831	1.0221	90.0946	2.94365	0.0597563	1.22362
fgfbp1b	ENSDARG00000091660	101886353	Ens95only	135.656	101.266	204.83	1.29124	0.0459487	1.33773	113.76	199.31	123.756	-1.21456	0.010853	1.96445
fgfbp2a	ENSDARG00000039964	793049	Both	309.101	499.168	599.575	3.27115	2.5126e-11	10.5999	305.61	501.852	597	3.25338	4.74722e-11	10.3236
fgfbp2b	ENSDARG00000038056	100037374	Both	13502.6	7657.31	10728.7	4.07321	1.53917e-10	9.81271	13361	7706.65	10709.4	4.07827	1.0933e-10	9.96126
fgfr1a	ENSDARG00000011027	30705	Both	2993.15	2879.42	2817.9	1.26454	0.00455346	2.34166	240.053	178.868	205.931	1.05494	0.0414192	1.3828
fgfr2	ENSDARG00000058115	352940	Both	5153.95	5213.64	4023.02	1.12484	0.00415422	2.38151	5082.57	5240.32	4005.74	1.13197	0.00353682	2.45139
fgfr3	ENSDARG00000004782	58129	Both	8831.19	5371.17	6660.95	1.89517	6.44864e-07	6.19053	8727.71	5421.23	6644.23	1.89861	4.01784e-07	6.39601
fgfr4	ENSDARG00000069105	100000160	Both	3122.99	5630.98	4002.14	1.72033	3.81249e-05	4.41879	3039.71	5632.81	3955.25	1.74145	3.40188e-05	4.46828
fgfrl1a	ENSDARG00000032617	393347	Both	2173.4	4802.44	3573.59	1.32105	0.00359628	2.44415	2133.48	4778.33	3526.56	1.33385	0.00319896	2.49499
fgfrl1b	ENSDARG00000052556	497135	Both	1199.58	1664.23	1412.93	2.53829	3.45546e-10	9.46149	1183.88	1673.18	1406.86	2.54646	2.78381e-10	9.55536
fgl1	ENSDARG00000105380	100003029	Ens95only	51.3554	15.3433	21.875	2.27348	0.0493474	1.30674	51.0956	15.3315	22.7712	2.07301	0.0753471	1.12293
fgl2a	ENSDARG00000019861	565637	Both	60.0761	306.865	207.813	1.73056	0.0108052	1.96637	59.7722	308.675	206.921	1.74374	0.0110315	1.95736
fhl1b	ENSDARG00000056653	387528	Both	383.712	971.74	520.03	1.58512	0.00127996	2.8928	375.987	970.997	513.836	1.61201	0.00119203	2.92371
fhl2a	ENSDARG00000042018	445277	Both	620.141	1442.27	953.553	3.34198	1.95364e-12	11.7092	612.183	1450.36	949.458	3.34887	2.27344e-12	11.6433
fhl3a	ENSDARG00000034643	567097	Both	944.746	2469.24	1332.39	2.47154	8.38232e-08	7.07664	932.254	2482.69	1326.67	2.48682	8.03755e-08	7.09488
fhl3b	ENSDARG00000104315	555053	Both	1245.13	1114.94	1039.06	2.68649	9.24345e-13	12.0342	1229.19	1120.22	1034.6	2.69182	5.6686e-13	12.2465
fhod1	ENSDARG00000051768	503946	Both	149.221	106.38	178.978	1.25844	0.0257683	1.58891	143.646	107.321	164.348	1.25044	0.0286858	1.54233
fibina	ENSDARG00000039949	553370	Both	3493.14	3561.68	2988.93	2.1716	2.94003e-06	5.53165	3458.11	3579.4	2987.97	2.17927	2.26747e-06	5.64446
fibinb	ENSDARG00000087196	550571	Ens95only	941.839	2144.99	1492.47	1.92534	5.51557e-05	4.25841	81.9458	124.696	113.856	1.22099	0.0861187	1.0649
fkbp10a	ENSDARG00000099183	799903	Both	255.808	628.051	302.273	2.10087	8.01431e-05	4.09613	263.191	632.681	322.756	2.03396	9.00145e-05	4.04569
fkbp10b	ENSDARG00000045129	324381	Both	1019.36	2115.33	1416.91	2.22318	2.76712e-06	5.55797	800.177	1896	1266.27	2.22719	4.97047e-06	5.3036
fkbp11	ENSDARG00000037000	368823	Ens95only	142.439	227.08	237.643	1.16352	0.0289436	1.53845	127.257	229.973	247.513	1.12194	0.0566141	1.24708
fkbp14	ENSDARG00000040695	445077	Both	688.938	1363.51	905.826	1.9482	1.67259e-05	4.77661	654.602	1324.64	860.354	1.942	1.86009e-05	4.73047
fkbp7	ENSDARG00000010962	368498	Both	816.842	1105.74	972.445	1.50666	0.000905166	3.04327	794.392	1085.47	959.359	1.52609	0.000912464	3.03978
fkbp9	ENSDARG00000005023	445126	Both	1170.52	2427.3	1717.19	2.3791	4.25996e-08	7.37059	1149.17	2441.8	1709.82	2.3885	4.55355e-08	7.34165
fli1a	ENSDARG00000054632	30619	Both	729.634	2354.68	1587.93	2.04728	7.89028e-05	4.10291	735.584	2369.23	1579.13	2.0512	6.61419e-05	4.17952
flna	ENSDARG00000074201	562529	Both	7469.79	9057.64	6449.16	1.68631	3.05247e-05	4.51535	7345.23	9082.4	6405.63	1.68897	2.74337e-05	4.56172
flncb	ENSDARG00000018820	570288	RefSeqOnly	109.494	166.73	156.108	0.738424	0.298548	0.524986	830.063	1688.51	1107.87	1.54479	0.0011942	2.92292
flot1b	ENSDARG00000037998	245697	Both	3155.94	5107.26	4096.6	1.40445	0.00017191	3.7647	3114.9	5134.02	4079.01	1.41231	0.000156016	3.80683
flrt2	ENSDARG00000097299	100535467	Ens95only	923.428	1384.99	943.61	1.49782	8.86908e-05	4.05212	120.509	150.249	116.826	1.01125	0.0974165	1.01137
flt4	ENSDARG00000104453	30121	Both	724.79	1037.2	686.081	2.0201	3.51757e-07	6.45376	706.662	1018.01	677.195	2.03726	2.93241e-07	6.53277
flvcr2b	ENSDARG00000031506	569329	Both	761.61	1777.77	1714.21	2.79748	3.45442e-08	7.46162	747.153	1789.7	1697.94	2.80113	3.64613e-08	7.43817
fmnl2a	ENSDARG00000012586	100006456	Both	747.076	1129.26	599.575	1.188	0.0145139	1.83822	756.793	1178.48	602.941	1.32161	0.00545742	2.26301
fmnl3	ENSDARG00000004372	407694	Both	757.735	1667.3	996.309	1.80895	4.33075e-05	4.36344	748.117	1677.27	992.031	1.81973	4.12977e-05	4.38407
fmoda	ENSDARG00000044895	791822	Both	1839.11	7758.58	6091.21	2.49885	1.99379e-05	4.70032	1815.34	7798.64	6065.05	2.5102	1.83003e-05	4.73754
fmodb	ENSDARG00000010294	797559	Both	50.3864	105.357	139.205	1.81392	0.00847128	2.07205	270.903	312.763	619.772	1.84237	0.00109601	2.96019
fn1a	ENSDARG00000019815	100005469	Both	6448.5	12455.7	9092.07	2.13423	1.03381e-06	5.98556	6316.57	12446.1	8997.58	2.1444	8.57145e-07	6.06695
fn1b	ENSDARG00000006526	334613	Both	2384.64	6646.7	3075.43	1.88143	7.18796e-05	4.14339	2348.47	6665.13	3039.45	1.89518	6.76834e-05	4.16952
fndc3ba	ENSDARG00000078179	572313	Both	1465.08	2039.63	1313.5	2.04126	1.82458e-07	6.73884	1442.25	2045.23	1299.94	2.07788	1.29544e-07	6.88758
fndc3bb	ENSDARG00000062023	568274	Both	350.767	173.89	204.83	1.32559	0.0122204	1.91291	1296.67	3156.25	2291.97	2.0627	1.06772e-05	4.97154
FO681288.1	ENSDARG00000054584	100002134	Both	195.732	148.318	220.739	1.11605	0.0354736	1.4501	162.928	124.696	185.139	1.20107	0.039464	1.4038
FO904898.5	ENSDARG00000092230	100006469	RefSeqOnly	8.72073	2.04577	0	-0.217188	1	0	639.177	1045.61	696.005	1.59914	9.73873e-05	4.0115
fosab	ENSDARG00000031683	394198	Both	173069	145366	123872	1.83078	0.00122542	2.91171	170835	146157	123412	1.8365	0.00108963	2.96272
fosl2	ENSDARG00000040623	558921	Both	7073.48	9517.94	6490.92	1.99707	0.0026838	2.57125	8004.66	11683.7	7886.74	2.05392	0.00209597	2.67862
foxa3	ENSDARG00000012788	30559	Both	1384.66	814.216	784.519	3.11772	8.53784e-14	13.0687	1364.16	815.638	776.2	3.14034	4.00354e-14	13.3976
foxc1a	ENSDARG00000091481	100148408	Both	6802.17	4609.12	3733.67	3.42931	3.83305e-15	14.4165	6713.77	4633.19	3718.63	3.43384	1.95942e-15	14.7079
foxc1b	ENSDARG00000055398	79375	Both	4630.71	4498.65	3750.58	2.97175	2.0983e-13	12.6781	4484.84	4499.29	3720.61	2.9743	1.48386e-13	12.8286
foxd1	ENSDARG00000029179	405849	Both	889.514	2089.75	1610.8	1.88372	6.24062e-05	4.20477	878.266	2100.42	1603.88	1.89328	5.87393e-05	4.23107
foxd2	ENSDARG00000058133	30525	Both	776.145	1678.55	1023.16	2.47234	2.19882e-08	7.65781	766.434	1687.49	1018.76	2.47936	2.25087e-08	7.64765
foxf1	ENSDARG00000015399	566407	RefSeqOnly	124.997	119.677	94.4604	1.1947	0.0872678	1.05915	262.227	275.968	219.791	1.08591	0.0303955	1.51719
foxf2a	ENSDARG00000017195	407681	Both	1986.39	1148.7	1111.65	2.55333	1.3886e-08	7.85742	166.784	420.084	387.11	2.29422	0.000406617	3.39081
foxf2b	ENSDARG00000070389	100002904	Both	2042.59	1098.58	874.008	3.38817	1.30698e-12	11.8837	2015.87	1104.89	870.254	3.38961	8.39354e-13	12.0761
foxl1	ENSDARG00000008133	393959	Both	1379.81	1005.5	682.104	2.95189	1.26077e-10	9.89936	1362.23	1010.86	679.175	2.95691	9.96306e-11	10.0016
foxl2a	ENSDARG00000042180	692279	Both	94.9591	255.721	137.216	2.56461	1.52002e-05	4.81815	316.214	534.559	358.398	1.65296	0.00801442	2.09613
foxm1	ENSDARG00000003200	394072	Both	687.969	1150.75	516.052	1.27852	0.010401	1.98293	691.237	1179.51	530.667	1.29261	0.0094882	2.02282
foxo1a	ENSDARG00000099555	768121	Both	2378.82	2397.64	1803.7	1.88742	2.19583e-07	6.6584	2359.07	2410.12	1791	1.89274	1.70937e-07	6.76716
foxo4	ENSDARG00000055792	563719	Both	4451.45	5328.21	4118.47	1.02296	0.0109106	1.96215	4412.54	5369.1	4143.36	1.01843	0.0109378	1.96107
foxp1a	ENSDARG00000004843	564127	Both	819.749	1003.45	1044.04	1.09935	0.00411401	2.38573	776.075	998.594	988.07	1.14002	0.00301857	2.5202
foxp1b	ENSDARG00000014181	569047	RefSeqOnly	351.736	356.987	290.342	0.630722	0.184645	0.733662	3704.91	3602.91	2830.55	1.15707	0.00348638	2.45763
foxp4	ENSDARG00000076120	557245	Both	23349.3	31122.3	20592.4	1.3224	0.000824191	3.08397	23117.4	31340.7	20529.7	1.33021	0.000708164	3.14987
FP102018.1	ENSDARG00000035682	562912	Both	1764.49	2979.66	2439.07	2.03994	2.48765e-06	5.60421	1741.11	2999.87	2430.57	2.04758	2.16287e-06	5.66497
fpr1	ENSDARG00000042984	568153	Both	281.97	947.191	663.212	2.22363	6.41917e-05	4.19252	282.472	970.997	675.214	2.22245	7.13832e-05	4.1464
frem1a	ENSDARG00000069473	100216326	Both	200.577	277.202	435.512	1.53899	0.00583537	2.23393	194.742	235.084	389.09	1.56116	0.00381594	2.4184
frem1b	ENSDARG00000062402	557221	Both	800.369	1069.94	783.524	1.95957	1.88231e-06	5.72531	868.625	1107.96	805.901	2.01103	1.04643e-06	5.98029
frmd6	ENSDARG00000002332	321937	Ens95only	1341.05	1795.16	1384.09	1.50352	0.000247337	3.60671	74.2332	54.1714	36.6319	1.08141	0.248548	0.60459
frzb	ENSDARG00000018383	30119	Both	3725.69	2215.57	2203.41	3.56091	1.94447e-17	16.7112	819.458	852.433	745.508	3.55064	1.77421e-14	13.751
fstb	ENSDARG00000057992	566538	Both	2158.87	2896.81	2115.91	1.21133	0.00814127	2.08931	2130.59	2904.81	2106.83	1.21741	0.00750315	2.12476
fstl1a	ENSDARG00000015559	325423	Both	1030.98	2795.54	1377.13	2.93691	1.05483e-07	6.97682	1018.06	2806.69	1371.22	2.94366	1.09376e-07	6.96108
fstl1b	ENSDARG00000039576	324309	Both	31257	50596	31718.8	2.19357	6.96173e-08	7.15728	2538.39	8459.94	6696.7	2.06708	0.000385067	3.41446
fstl3	ENSDARG00000025670	557352	Both	10275	12219.4	9557.41	1.88164	9.5273e-05	4.02103	8874.25	11525.2	8936.2	1.88092	8.0609e-05	4.09362
fthl27	ENSDARG00000031776	436651	Both	29459.6	25465.7	17859	1.39853	0.000776725	3.10973	28885.4	25320.5	17524.9	1.43528	0.000521383	3.28284
fuca1.2	ENSDARG00000035879	445165	Both	237.398	391.765	315.2	1.01493	0.0312751	1.5048	241.981	428.261	345.528	1.04055	0.0276692	1.558
furina	ENSDARG00000062909	566557	Both	1704.42	2431.4	2282.96	1.60531	4.26603e-05	4.36998	3079.23	3349.43	3216.67	1.62541	2.17837e-05	4.66187
fut11	ENSDARG00000102402	568888	Both	136.625	287.431	216.762	1.84632	0.0042686	2.36971	171.604	304.586	233.652	1.48713	0.00518033	2.28564
fxyd1	ENSDARG00000099014	503884	Both	6369.04	11071.7	8335.39	2.96625	1.06877e-09	8.97112	6286.69	11128.6	8297.61	2.9733	9.42319e-10	9.0258
fzd2	ENSDARG00000054438	30370	Both	2903.03	5802.82	3342.9	1.62561	0.000226457	3.64501	2484.4	5339.46	3135.49	1.64064	0.000228156	3.64177
fzd4	ENSDARG00000104117	30363	Both	1061.02	1623.32	1110.66	1.21958	0.00322114	2.49199	1046.98	1631.28	1105.89	1.22756	0.00295851	2.52893
fzd7a	ENSDARG00000060004	30369	Both	3342.95	5751.68	3946.46	1.01523	0.0185606	1.73141	3300.01	5781.01	3929.51	1.0234	0.0174417	1.75841
fzd7b	ENSDARG00000027589	30412	Both	2676.3	5097.03	3621.31	1.66463	4.27736e-05	4.36882	2642.51	5123.8	3605.76	1.67349	3.85491e-05	4.41399
fzd9a	ENSDARG00000035185	557447	Both	155.035	130.929	73.5797	2.38517	9.87317e-05	4.00554	331.639	219.752	150.488	2.62724	5.38702e-07	6.26865
fzd9b	ENSDARG00000014673	58023	Both	661.807	1477.05	963.496	2.30437	1.35162e-07	6.86914	544.698	1389.04	865.304	2.33819	5.33315e-07	6.27302
gabarapb	ENSDARG00000052082	793200	Both	3837.12	3207.77	3115.21	1.0266	0.00408387	2.38893	3787.82	3223.71	3101.83	1.03145	0.00336998	2.47237
gadd45ab	ENSDARG00000104571	431763	Both	3639.45	3634.31	2529.55	2.22318	8.87416e-09	8.05187	3592.12	3652.99	2518.69	2.22946	6.2561e-09	8.2037
gadd45ba	ENSDARG00000027744	406304	Both	14362.1	14030.9	10283.3	1.93634	0.00166826	2.77774	14111.1	13818.8	10129.2	1.95549	0.00151468	2.81968
gadd45bb	ENSDARG00000013576	497646	Both	7260.49	6786.84	5386.23	2.26558	8.65956e-05	4.0625	7142.78	6796.98	5348.25	2.28103	8.09082e-05	4.09201
galcb	ENSDARG00000016474	406385	Both	200.577	228.103	248.58	1.03429	0.0304779	1.51602	198.598	229.973	246.523	1.03793	0.03135	1.50376
galns	ENSDARG00000051853	791159	Both	180.228	277.202	255.54	1.55838	0.00114461	2.94134	178.353	279.034	254.443	1.56351	0.00128	2.89279
garem	ENSDARG00000017242	393138	RefSeqOnly	584.289	960.489	829.263	0.782562	0.118301	0.927011	433.831	787.019	601.951	1.11962	0.0248018	1.60552
gas6	ENSDARG00000007804	335830	Both	1124.97	1123.13	883.951	2.17848	5.08695e-06	5.29354	1106.75	1129.42	880.155	2.19196	5.18756e-06	5.28504
gata2a	ENSDARG00000059327	30480	Both	950.56	824.445	997.303	1.46008	0.000546382	3.2625	965.996	838.124	1004.9	1.47253	0.000462981	3.33444
gata6	ENSDARG00000103589	58076	Both	112.401	73.6477	112.358	1.34406	0.0257597	1.58906	117.616	74.6135	111.876	1.36778	0.0246803	1.60765
gb:eh456644	ENSDARG00000101743	797203	Both	45.5416	69.5561	26.8466	2.21008	0.0136497	1.86488	46.2753	72.5693	27.7214	2.07797	0.0156292	1.80606
gbe1a	ENSDARG00000029051	100333665	Both	439.912	248.561	263.495	2.90272	1.32224e-07	6.87869	434.795	247.349	257.413	2.95549	7.19208e-08	7.14315
GCA	ENSDARG00000020187	449543	Both	1305.2	1856.54	1499.44	1.16435	0.0105986	1.97475	1287.03	1865.34	1486.07	1.17918	0.00966426	2.01483
gcat	ENSDARG00000005643	402822	Both	295.536	387.673	362.927	1.00108	0.0472939	1.32519	292.113	389.421	361.368	1.00627	0.0465867	1.33174
gch1	ENSDARG00000070453	100192219	Ens95only	993.194	776.369	749.718	1.80406	1.9337e-05	4.71361	18.3173	7.15472	0.99005	-0.0155618	0.995647	0.00189475
gdf10a	ENSDARG00000095378	563003	Both	149.221	713.973	560.797	1.61983	0.0160922	1.79339	1671.69	2231.25	2138.51	1.43016	8.89307e-05	4.05095
gdf7	ENSDARG00000042784	30642	Ens95only	33.9139	56.2586	41.7615	1.74352	0.0335117	1.4748	80.9817	135.94	73.2637	1.23681	0.0616546	1.21003
gfpt2	ENSDARG00000044094	569945	Both	100.773	132.975	68.6081	1.85121	0.00350838	2.45489	100.263	125.719	60.3931	1.80253	0.00695322	2.15781
gfra4b	ENSDARG00000074582	565651	Both	178.29	351.872	146.165	1.88195	0.000397373	3.4008	165.82	350.581	145.537	1.86119	0.000634229	3.19775
ggctb	ENSDARG00000005085	406278	Both	6395.2	15500.8	9491.78	3.88766	7.02647e-08	7.15326	6114.12	14987.1	9291.62	3.91456	5.78797e-08	7.23747
ggh	ENSDARG00000037176	406624	Both	211.235	273.11	280.398	1.24869	0.00419982	2.37677	157.143	229.973	240.582	1.23837	0.00976242	2.01044
ggps1	ENSDARG00000023627	336798	Both	1391.44	1252.01	1174.29	1.02667	0.0271712	1.56589	1374.76	1258.21	1169.25	1.03296	0.0248712	1.6043
ggt5a	ENSDARG00000052045	569734	Both	442.819	975.832	557.814	1.28609	0.0070631	2.151	400.088	967.931	544.528	1.48316	0.00211957	2.67375
ghra	ENSDARG00000054771	100001424	Both	1603.65	978.9	1367.19	1.34515	0.006595	2.18079	1583	982.24	1361.32	1.34918	0.00596692	2.22425
ghrb	ENSDARG00000007671	560202	Both	1223.81	1017.77	1235.94	1.50041	0.000458677	3.33849	1234.01	993.483	1140.54	1.6476	0.000188203	3.72537
ginm1	ENSDARG00000021975	555775	Both	1695.7	1854.49	1552.13	1.09175	0.00230035	2.63821	1603.25	1828.54	1525.67	1.14531	0.00117139	2.9313
GLB1L2	ENSDARG00000034941	799022	RefSeqOnly	9.6897	43.984	11.9318	1.28342	0.346863	0.459843	92.5505	124.696	77.2239	1.19765	0.0499525	1.30144
gli1	ENSDARG00000101244	352930	Both	1551.32	1785.96	1360.23	1.62165	1.71741e-05	4.76513	1530.94	1794.81	1355.38	1.62774	1.45698e-05	4.83655
gli2a	ENSDARG00000025641	30154	Both	1759.65	2788.38	2517.62	1.06376	0.0273916	1.56238	1736.29	2801.58	2506.81	1.07959	0.0243246	1.61395
gli3	ENSDARG00000052131	403042	Both	1405.01	1473.98	1228.98	1.20942	0.00109111	2.96213	1386.33	1483.07	1226.67	1.21429	0.000947252	3.02353
glipr2l	ENSDARG00000016837	449805	Both	153.097	401.994	219.745	1.76055	0.00160058	2.79572	151.359	403.73	218.801	1.77919	0.00167123	2.77696
glis1a	ENSDARG00000068580	101883139	RefSeqOnly	35.8519	82.8536	32.8126	1.14716	0.189159	0.723173	190.885	467.101	183.159	1.38257	0.0153372	1.81425
glis1b	ENSDARG00000027933	100333406	RefSeqOnly	83.3314	29.6636	68.6081	0.882587	0.313489	0.503777	587.117	480.388	468.294	1.56747	0.0001785	3.74836
glis2a	ENSDARG00000078388	102725534	Both	1410.82	2183.86	1535.23	1.90246	7.25821e-06	5.13917	1387.29	2195.48	1527.65	1.91167	6.55245e-06	5.1836
glis2b	ENSDARG00000100232	102725539	RefSeqOnly	52.3244	19.4348	37.7842	1.30499	0.208545	0.6808	709.554	1398.24	1113.81	1.96839	1.24423e-05	4.9051
glo1	ENSDARG00000068978	368213	Both	1187.96	1496.48	1259.8	1.06263	0.0158908	1.79886	1166.52	1504.53	1250.43	1.07276	0.0149609	1.82504
glt8d1	ENSDARG00000040157	492466	Both	175.384	502.236	394.745	1.50276	0.00517387	2.28618	96.4068	333.205	285.135	1.53709	0.0119285	1.92341
glud1a	ENSDARG00000008816	317737	Both	1374.97	2085.66	2002.56	1.38435	0.00099235	3.00334	1357.41	2096.33	1993.96	1.39174	0.000917943	3.03718
glulb	ENSDARG00000100003	336473	Both	8159.7	13548.1	8018.2	1.36787	0.000663831	3.17794	8180.12	13768.7	8075.84	1.37935	0.000562661	3.24975
gna12a	ENSDARG00000025826	503589	Both	1650.16	1649.91	1100.71	2.20087	8.24225e-09	8.08395	1628.31	1658.87	1095.99	2.20663	6.55331e-09	8.18354
gnav1	ENSDARG00000043006	571305	Ens95only	82.3624	320.163	259.518	1.47814	0.0251034	1.60027	17.3532	127.763	111.876	1.65021	0.0632447	1.19898
gng12a	ENSDARG00000003375	406604	Both	200.577	516.557	414.632	1.2544	0.0202877	1.69277	187.993	505.941	399.98	1.27211	0.0215772	1.66601
gnl1	ENSDARG00000061789	568505	Both	370.147	285.385	395.739	1.29017	0.0305133	1.51551	365.382	287.211	394.04	1.29316	0.0309447	1.50941
gnmt	ENSDARG00000006840	403338	Both	640.489	728.294	600.569	1.22789	0.00297981	2.52581	617.968	710.361	587.1	1.27942	0.00192093	2.71649
gnpda2	ENSDARG00000024443	556291	Ens95only	602.699	700.676	401.705	1.12242	0.0241178	1.61766	31.8142	23.5084	10.8906	0.0721022	0.968447	0.0139243
golim4a	ENSDARG00000106760	100000956	Both	189.918	166.73	175.995	1.21631	0.0380178	1.42001	179.317	152.293	155.438	1.47555	0.0153372	1.81425
golim4b	ENSDARG00000014545	541535	Both	195.732	414.268	235.654	1.93567	0.00015274	3.81605	198.598	417.018	239.592	1.96576	0.000129328	3.88831
gosr2	ENSDARG00000053070	324569	Both	414.719	605.548	427.558	1.0969	0.0150629	1.82209	409.729	605.085	420.771	1.11557	0.0150512	1.82243
gpat3	ENSDARG00000016048	436958	Both	1058.12	2006.9	1048.01	1.61789	0.000142801	3.84527	1044.09	2016.61	1043.51	1.62591	0.000138696	3.85794
gpc4	ENSDARG00000015472	118437	Ens95only	6433.96	7729.94	6253.28	2.1825	1.06215e-09	8.97381	42.419	84.8345	88.1145	1.25807	0.114403	0.941561
gpc5c	ENSDARG00000074082	100006305	RefSeqOnly	49.4175	15.3433	34.8012	1.75154	0.0946428	1.02391	327.783	53.1493	151.478	2.37318	0.00102182	2.99063
gpr146	ENSDARG00000059610	565192	Both	1168.58	1896.43	1386.08	1.47494	0.000137181	3.86271	1153.03	1906.22	1378.15	1.48564	0.000122965	3.91022
gpr157	ENSDARG00000034975	555274	Both	223.832	377.444	208.807	1.55145	0.00124261	2.90567	221.736	379.2	207.911	1.56513	0.00129232	2.88863
gpr22a	ENSDARG00000004592	504167	Both	1877.86	889.909	744.746	3.09721	1.12263e-09	8.94976	1852.94	894.339	741.548	3.09693	9.2729e-10	9.03278
gpt2l	ENSDARG00000019541	403086	Both	1536.79	2649.27	2378.41	1.83845	4.37432e-05	4.35909	1516.48	2662.58	2364.24	1.84685	4.13552e-05	4.38347
gpx4a	ENSDARG00000068478	352928	Both	1807.13	972.763	1031.11	1.22085	0.0221652	1.65433	1782.56	978.152	1026.68	1.22554	0.0206008	1.68612
gpx7	ENSDARG00000091511	552981	Both	80.4245	161.616	143.182	1.65056	0.00965614	2.0152	258.37	410.885	293.055	1.90733	0.00075286	3.12329
gpx8	ENSDARG00000013302	393191	Both	227.708	526.786	457.387	1.44341	0.004638	2.33367	214.023	522.294	450.473	1.44974	0.00527586	2.27771
grapa	ENSDARG00000005414	553596	Both	271.312	273.11	183.949	1.68641	0.0014724	2.83197	268.975	273.923	184.149	1.68641	0.00154888	2.80998
grb10a	ENSDARG00000002013	446167	Both	2407.89	953.328	933.667	1.84092	0.00133309	2.87514	2378.36	957.71	929.657	1.82644	0.0013908	2.85674
grb10b	ENSDARG00000035308	562032	Both	1361.4	1716.4	1077.84	1.51739	0.00139505	2.85541	1214.73	1458.54	911.836	1.537	0.000954134	3.02039
grb2a	ENSDARG00000105276	493609	Both	508.709	326.3	306.251	1.08525	0.0351992	1.45347	502.279	327.073	304.936	1.08539	0.0348981	1.4572
grem2b	ENSDARG00000103092	550399	Both	292.629	567.701	383.808	1.64888	0.00177105	2.75177	316.214	599.974	399.98	1.58862	0.00211704	2.67427
grinab	ENSDARG00000052746	394183	Both	1272.26	1403.4	1163.35	1.06608	0.0116282	1.93449	1256.18	1411.52	1158.36	1.07316	0.0104596	1.98049
grk4	ENSDARG00000070448	560761	Both	2172.43	2283.08	1520.32	1.41528	0.000139559	3.85524	1289.92	1024.15	664.324	1.40136	0.00183733	2.73581
gsdmeb	ENSDARG00000040485	335722	RefSeqOnly	66.8589	109.449	100.426	0.747598	0.299657	0.523376	225.592	332.183	224.741	1.19697	0.0127232	1.8954
gstr	ENSDARG00000042620	564619	Both	3103.61	2729.06	2642.9	1.38699	0.00317302	2.49853	2405.35	2124.95	2024.65	1.45163	0.00218298	2.66095
gstt1a	ENSDARG00000042428	563972	Both	689.907	1183.48	843.184	1.25828	0.0118605	1.9259	672.92	1187.68	827.682	1.26167	0.0127084	1.89591
gstt1b	ENSDARG00000017388	393556	Both	1233.5	1470.91	1112.64	1.42861	0.000485264	3.31402	1209.91	1464.67	1096.98	1.42902	0.000522253	3.28212
gstz1	ENSDARG00000027984	436754	Both	1792.59	1086.3	1122.59	1.54734	0.00335815	2.4739	1735.32	1085.47	1102.92	1.60641	0.00188573	2.72452
gtf2a1l	ENSDARG00000063670	767629	Ens95only	863.352	896.047	592.615	1.14052	0.00436482	2.36003	125.329	304.586	164.348	0.736455	0.248688	0.604345
gtpbp4	ENSDARG00000018961	334050	Both	7448.47	4464.89	5477.71	1.14204	0.0150952	1.82116	7351.98	4487.03	5455.18	1.1457	0.0135852	1.86693
gulp1a	ENSDARG00000001733	368404	Both	946.684	2484.59	1507.39	1.92816	2.37593e-05	4.62417	896.583	2439.76	1486.07	1.98895	1.54007e-05	4.81246
gyg1a	ENSDARG00000011934	406831	Both	4020.26	1928.14	2024.44	2.48954	1.16546e-07	6.9335	3968.1	1937.91	2015.74	2.49126	8.81286e-08	7.05488
gyg1b	ENSDARG00000059391	415152	Both	830.407	660.783	797.445	2.17136	1.70757e-05	4.76762	505.172	568.289	667.294	2.21705	8.77503e-06	5.05675
gypc	ENSDARG00000041546	335987	Both	0.96897	151.387	67.6138	2.59521	0.0382262	1.41764	0.964068	148.205	67.3234	2.64506	0.0379345	1.42097
gys1	ENSDARG00000016875	394155	Ens95only	611.42	704.767	641.337	1.61496	1.5364e-05	4.8135	170.64	137.984	177.219	0.985925	0.113675	0.944335
h1fx	ENSDARG00000054058	322508	Both	7871.91	2702.46	2694.61	1.17481	0.0441791	1.35478	7516.84	2662.58	2607.79	1.18843	0.0370124	1.43165
hapln1a	ENSDARG00000089769	493635	Both	5579.33	17163	9004.56	2.08705	0.000166409	3.77882	5507.72	17251	8966.89	2.0987	0.000152769	3.81597
hapln1b	ENSDARG00000068516	569074	Both	7423.28	4455.68	6118.05	4.12038	7.29478e-25	24.137	239.089	150.249	73.2637	3.39105	5.79764e-07	6.23675
has2	ENSDARG00000036987	260350	Both	386.619	875.589	660.229	1.83723	5.91045e-05	4.22838	89.6583	153.315	118.806	1.80493	0.00286922	2.54224
has3	ENSDARG00000057210	282555	RefSeqOnly	51.3554	22.5035	12.9262	0.897052	0.490078	0.309735	188.957	192.155	179.199	1.49829	0.00393039	2.40556
hbegfa	ENSDARG00000075121	797938	Both	2549.36	3348.92	1796.74	1.44494	0.0145967	1.83575	2493.08	3310.59	1766.25	1.45335	0.0140588	1.85205
hbl1	ENSDARG00000068221	100007982	Both	95.928	75.6935	84.5172	1.82755	0.00187937	2.72599	95.4427	75.6356	84.1543	1.83709	0.00241863	2.61643
hbp1	ENSDARG00000028517	554137	Both	3057.1	2572.55	1765.91	1.56819	5.53656e-05	4.25676	1003.59	704.228	538.587	1.57595	0.000166559	3.77843
hdlbpa	ENSDARG00000009830	794178	Both	13106.3	12731.8	12380.3	1.50739	3.29076e-05	4.4827	12934.9	12788.5	12308.3	1.51716	2.44228e-05	4.61221
helb	ENSDARG00000053127	797342	Both	169.57	345.735	228.694	1.10542	0.0317232	1.49862	167.748	347.515	227.712	1.11079	0.0327774	1.48443
her6	ENSDARG00000006514	30288	Both	26392.8	46341.8	24220.6	1.94644	0.00366284	2.43618	26036.6	46498.5	24059.2	1.95675	0.00336125	2.4735
her9	ENSDARG00000056438	140613	Both	14137.3	27305.9	13729.6	1.80913	0.00153046	2.81518	13958.7	27519.1	13683.5	1.81958	0.00141223	2.8501
hey1	ENSDARG00000070538	58008	Both	2007.71	2671.77	1705.26	2.40823	1.1194e-06	5.95101	1981.16	2686.08	1698.93	2.41619	9.48215e-07	6.02309
hey2	ENSDARG00000013441	58146	Both	1093.97	1130.29	751.706	2.36651	1.45918e-08	7.83589	1079.76	1138.62	748.478	2.37034	1.23632e-08	7.90787
hgd	ENSDARG00000058005	259189	Both	7575.41	7712.55	6735.53	2.18035	1.26173e-07	6.89903	7401.15	7686.21	6629.38	2.23063	8.94521e-08	7.04841
hgfa	ENSDARG00000045544	493781	Both	153.097	180.028	139.205	1.97979	5.83159e-05	4.23421	151.359	185.001	137.617	1.94686	0.000139943	3.85405
hhip	ENSDARG00000060397	326102	Both	2879.78	4803.47	4238.79	1.83733	1.77427e-06	5.75098	2843.04	4828.41	4220.59	1.84647	1.51137e-06	5.82063
hhla2a.1	ENSDARG00000043182	541514	Both	1200.55	1379.87	807.388	2.40194	1.09838e-07	6.95925	1274.5	1497.38	832.632	2.4134	1.30583e-07	6.88411
hic1	ENSDARG00000055493	436585	Both	363.364	280.27	200.853	2.17754	2.43198e-06	5.61404	344.172	265.747	199.99	2.20589	1.6521e-06	5.78196
hif1al	ENSDARG00000100826	393376	Both	5116.16	5823.28	3725.72	1.12624	0.00588079	2.23056	5010.26	5853.58	3705.76	1.13888	0.00515454	2.28781
higd1a	ENSDARG00000022303	373084	Both	2183.09	2720.87	2306.82	1.52712	0.00364068	2.43882	2114.2	2693.24	2258.31	1.53872	0.00346052	2.46086
hipk3a	ENSDARG00000062469	564413	Both	1692.79	2408.89	2006.54	1.19016	0.00145712	2.8365	1670.73	2421.36	1998.91	1.19534	0.00132955	2.8763
hist2h2l	ENSDARG00000068996	386920	Both	5212.09	2750.54	3019.75	1.04339	0.0323628	1.48995	5144.27	2764.79	3006.78	1.04632	0.0294524	1.53088
histh1l	ENSDARG00000035519	550353	Both	30096.2	11294.7	8481.55	1.18037	0.0411168	1.38598	29705.8	11354.5	8445.13	1.18115	0.0383434	1.41631
hivep2a	ENSDARG00000039987	562048	Both	1458.3	1588.54	1614.78	1.2374	0.000415216	3.38173	1465.38	1600.61	1603.88	1.23331	0.000398091	3.40002
hlfa	ENSDARG00000074752	768192	Both	1456.36	1265.31	968.468	1.26781	0.00325936	2.48687	560.124	570.333	455.423	1.05888	0.0221869	1.6539
hmcn1	ENSDARG00000016936	559150	Both	1442.8	1792.09	1127.56	2.11884	9.18217e-07	6.03705	1432.61	1800.94	1123.71	2.12487	7.90778e-07	6.10195
hmcn2	ENSDARG00000079327	565032	Both	466.075	869.452	867.047	2.01964	1.73807e-05	4.75993	485.89	921.936	905.896	2.05528	1.26866e-05	4.89665
hmox1a	ENSDARG00000027529	791518	Both	380.805	280.27	252.557	1.2815	0.0377472	1.42312	375.987	273.923	249.493	1.28139	0.0410913	1.38625
homeza	ENSDARG00000054304	368671	Both	395.34	808.079	507.103	1.70852	0.0209008	1.67984	1040.23	1980.83	1230.63	1.85641	0.00285033	2.5451
hopx	ENSDARG00000089368	386589	Both	926.335	1125.17	1170.32	1.44195	0.000429769	3.36677	913.937	1097.74	1134.6	1.46184	0.000264863	3.57698
hoxa11b	ENSDARG00000007009	30382	Ens95only	130.811	77.7392	89.4888	1.93551	0.00618468	2.20868	30.8502	30.6631	37.6219	1.53591	0.199478	0.700104
hoxa13b	ENSDARG00000036254	30438	Both	78.4866	77.7392	114.347	1.90704	0.00207649	2.68267	78.0895	78.7019	113.856	1.90318	0.00262637	2.58064
hoxa1a	ENSDARG00000104307	58051	RefSeqOnly	20.3484	49.0985	26.8466	0.539562	0.64982	0.187207	395.268	648.013	400.97	1.00415	0.0323186	1.49055
hoxc8a	ENSDARG00000070346	449648	RefSeqOnly	23.2553	20.4577	22.8694	1.27475	0.372329	0.429073	56.88	74.6135	56.4329	1.59179	0.0484232	1.31495
hpdb	ENSDARG00000044935	445287	Both	13494.8	13008	14447.5	2.51198	4.03852e-08	7.39378	13320.5	13074.7	14386.4	2.51771	3.0663e-08	7.51338
hpgd	ENSDARG00000012016	565975	Both	1036.8	1889.27	1027.13	1.44955	0.00104941	2.97906	1046.01	1984.92	1049.45	1.47032	0.000954954	3.02002
hsd11b2	ENSDARG00000001975	334098	Both	468.013	1015.72	472.302	1.17037	0.0449066	1.34769	460.825	1021.08	470.274	1.18479	0.0422978	1.37368
hsd3b7	ENSDARG00000036966	327462	Both	748.045	1000.38	888.922	1.71284	2.68587e-05	4.57092	740.404	990.417	895.006	1.73966	1.82313e-05	4.73918
hsh2d	ENSDARG00000042908	548337	Both	175.384	226.057	185.938	1.61241	0.00639338	2.19427	163.892	237.128	199	1.6461	0.00883874	2.05361
hspa12a	ENSDARG00000070603	751725	Both	826.531	912.413	683.098	1.4593	0.000396891	3.40133	823.314	914.782	697.986	1.44788	0.000418309	3.3785
hspa12b	ENSDARG00000030307	735291	Both	675.372	1528.19	1003.27	1.10813	0.042247	1.3742	649.782	1511.69	971.24	1.15169	0.0347058	1.4596
hspa8	ENSDARG00000068992	573376	Both	101012	80801.7	98946.8	1.10468	0.0131941	1.87962	99223.8	80923.9	98333.8	1.11119	0.011754	1.92981
hspb8	ENSDARG00000058365	791580	Both	1557.13	426.543	1170.32	2.05885	0.000232594	3.6334	500.351	104.254	346.518	1.72575	0.00722734	2.14102
hspb9	ENSDARG00000078674	100137108	RefSeqOnly	437.005	148.318	135.228	2.66652	0.302082	0.519875	363.454	113.453	104.945	2.63418	0.00464665	2.33286
hspg2	ENSDARG00000076564	565429	Both	961.218	944.122	857.104	1.25701	0.00220862	2.65588	5251.28	5967.03	4893.82	1.71067	2.17932e-06	5.66168
htra1a	ENSDARG00000032831	431766	Both	1041.64	2047.81	1436.79	1.36333	0.00296018	2.52868	1017.09	2028.87	1423.69	1.37205	0.0028348	2.54748
htra1b	ENSDARG00000014907	565082	Both	897.266	1625.36	967.474	2.1029	1.65e-06	5.78252	885.979	1634.34	963.319	2.11166	1.6041e-06	5.79477
HTRA3	ENSDARG00000010925	573378	Both	65.89	367.216	125.284	2.52699	0.000350369	3.45547	404.909	1379.84	460.373	2.17305	0.000268215	3.57152
hvcn1	ENSDARG00000040338	436618	Both	586.227	836.72	514.064	1.64631	5.58543e-05	4.25294	578.441	820.748	507.896	1.63962	6.06611e-05	4.21709
hyal1	ENSDARG00000059916	664772	Both	442.819	133.998	430.541	2.19312	0.000865872	3.06255	491.675	162.514	489.085	2.2291	0.000456168	3.34087
hyal2b	ENSDARG00000062997	559228	Ens95only	656.962	795.804	437.501	1.016	0.0489934	1.30986	48.2034	51.1051	55.4428	0.630103	0.517664	0.285952
hyal4	ENSDARG00000051823	108181664	Both	1104.63	2523.46	1204.12	1.48472	0.00440196	2.35635	1045.05	2510.28	1153.41	1.49523	0.00470312	2.32761
id2b	ENSDARG00000029544	321364	Both	1645.31	1352.25	1337.36	1.40297	0.00125067	2.90286	1650.48	1366.55	1332.61	1.40852	0.00107806	2.96736
id3	ENSDARG00000054823	246093	Both	2309.06	3783.65	2184.52	2.05501	1.80623e-06	5.74323	2279.06	3802.22	2183.06	2.06534	1.53114e-06	5.81499
idua	ENSDARG00000062904	567720	RefSeqOnly	165.694	248.561	155.114	0.833166	0.118952	0.92463	66.5207	85.8566	64.3533	1.51554	0.0260187	1.58471
ier2a	ENSDARG00000099195	797137	Both	39750.1	39552.9	26057.2	2.34905	0.000458677	3.33849	39233.7	39761.8	25946.3	2.35623	0.000414287	3.3827
ier5	ENSDARG00000009881	359827	Both	10007.5	12364.6	8074.88	1.39439	0.00968238	2.01402	9877.84	12427.7	8040.2	1.4023	0.00874029	2.05847
ier5l	ENSDARG00000054906	326935	Both	4325.48	9857.54	5287.8	1.30649	0.00968238	2.01402	4268.89	9908.26	5266.08	1.31688	0.00885784	2.05267
ifi30	ENSDARG00000056378	336503	Both	1079.43	1151.77	859.093	1.17466	0.0114797	1.94007	1065.3	1154.98	850.453	1.18445	0.0103781	1.98388
ifitm1	ENSDARG00000093303	100003209	Both	7562.81	3465.53	4518.19	1.2391	0.0386205	1.41318	7464.78	3483.32	4498.79	1.24193	0.0360059	1.44363
ifrd1	ENSDARG00000068708	555178	Both	2467.97	4641.85	3039.64	1.31748	0.00167395	2.77626	2411.13	4650.57	3021.63	1.32937	0.00149179	2.82629
igf2a	ENSDARG00000018643	30710	Both	632.737	835.697	631.393	1.48883	0.0001618	3.79102	624.716	840.168	628.682	1.49525	0.00015694	3.80427
igf2b	ENSDARG00000033307	324215	Both	9207.15	15934.5	8438.8	2.07613	5.07908e-05	4.29421	9087.31	16016.3	8398.6	2.08508	4.48605e-05	4.34814
igf2bp2b	ENSDARG00000099758	557028	Both	2110.42	1548.65	1419.89	1.15427	0.00653461	2.18478	4341.2	4622.97	3984.95	1.10648	0.00237304	2.6247
igfbp1a	ENSDARG00000099351	317638	Both	2005.77	1539.44	698.013	1.23879	0.0390592	1.40828	1979.23	1545.42	695.015	1.24933	0.0357318	1.44695
igfbp1b	ENSDARG00000038666	793907	Both	309.101	169.799	166.051	1.59578	0.00727738	2.13803	305.61	170.691	165.338	1.59763	0.00757803	2.12044
igfbp2a	ENSDARG00000052470	794176	Both	3297.4	6417.58	5044.19	4.25789	2.81676e-10	9.55025	3254.69	6446.4	5020.55	4.26959	2.66028e-10	9.57507
igfbp3	ENSDARG00000099144	403079	Both	1688.91	1795.16	1558.1	2.05971	2.18173e-08	7.6612	1666.87	1804.01	1552.4	2.06623	1.6002e-08	7.79583
igfbp7	ENSDARG00000104138	405860	Both	2841.99	961.511	1404.97	2.79391	2.2133e-08	7.65496	9646.47	3269.71	5105.69	2.75097	5.6493e-07	6.24801
igsf10	ENSDARG00000077497	100329456	Ens95only	390.495	466.435	416.62	1.23696	0.0256272	1.5913	173.532	178.868	184.149	0.958138	0.138597	0.858247
il10rb	ENSDARG00000078042	619391	Both	670.527	356.987	392.757	1.21963	0.0169636	1.77048	673.884	360.802	397.01	1.19998	0.0203995	1.69038
il11a	ENSDARG00000037859	570404	Both	90.1142	30.6865	36.7899	3.20107	0.000674547	3.17099	5491.33	2990.67	2645.41	4.59331	0.00352558	2.45277
il13ra1	ENSDARG00000080020	799475	Both	2617.19	3447.12	2613.07	2.36003	9.83156e-05	4.00738	331.639	1326.69	921.737	2.43061	0.000959988	3.01773
il15	ENSDARG00000052361	654826	Both	654.055	410.177	305.256	1.82957	0.000494205	3.30609	645.926	412.929	303.945	1.82965	0.00049864	3.30221
il15l	ENSDARG00000007743	494451	Both	130.811	224.012	94.4604	1.51149	0.00899706	2.0459	70.377	127.763	59.403	1.63204	0.0204602	1.68909
il16	ENSDARG00000102908	100534674	Ens95only	1079.43	556.449	732.814	2.23995	7.64745e-08	7.11648	107.976	54.1714	92.0747	0.838377	0.255047	0.593379
il17rd	ENSDARG00000098359	171474	Both	741.262	1177.34	1136.51	1.35531	0.000706528	3.15087	667.135	1071.16	1050.44	1.46602	0.000351919	3.45356
il34	ENSDARG00000091003	560193	Both	291.66	328.346	290.342	1.14013	0.03111	1.5071	288.256	330.139	289.095	1.14556	0.0309734	1.50901
il4r.1	ENSDARG00000102583	503594	Both	794.555	631.12	469.319	2.10799	1.42787e-05	4.84531	784.751	611.217	439.582	2.19063	3.35538e-06	5.47426
il4r.2	ENSDARG00000116052	563674	Both	198.639	155.478	181.961	1.69489	0.0115948	1.93574	190.885	344.448	309.886	1.5056	0.0073906	2.13132
il6st	ENSDARG00000104693	100006778	Ens95only	4609.39	6644.66	4978.56	1.58033	0.000734751	3.13386	540.842	333.205	339.587	1.37186	0.0594951	1.22552
ilk	ENSDARG00000056964	393543	Both	1207.34	2648.25	2075.15	1.5988	0.000188536	3.72461	1113.5	2566.5	2005.84	1.66033	0.000134242	3.87211
im:7150988	ENSDARG00000109310	504039	Both	184.104	115.586	233.665	1.49236	0.0276295	1.55863	166.784	104.254	215.831	2.07406	0.011441	1.94153
im:7151449	ENSDARG00000086724	492708	RefSeqOnly	75.5797	195.371	131.25	1.17997	0.0670965	1.1733	107.012	259.614	190.09	1.18073	0.0457759	1.33936
im:7152348	ENSDARG00000097082	559250	Both	1597.83	854.109	1352.28	2.07685	1.35749e-05	4.86726	1577.22	858.566	1346.47	2.0827	1.13371e-05	4.9455
im:7160594	ENSDARG00000070957	100003326	RefSeqOnly	22.2863	62.396	42.7558	1.15233	0.293354	0.532609	295.005	375.112	241.572	1.01436	0.0258699	1.58721
ing3	ENSDARG00000034326	393911	Both	1528.07	1788	1340.34	1.27754	0.000355672	3.44895	1505.87	1796.86	1334.59	1.28575	0.000303704	3.51755
inhbaa	ENSDARG00000012671	30072	Both	1570.7	1768.57	1141.48	1.28856	0.00243672	2.61319	1550.22	1782.55	1136.58	1.29605	0.00225088	2.64765
inka1a	ENSDARG00000070360	692272	Both	412.781	795.804	494.177	1.78904	3.45139e-05	4.46201	412.621	799.284	492.055	1.79377	3.49822e-05	4.45615
inka1b	ENSDARG00000070404	327328	Both	216.08	559.518	319.177	1.1365	0.0379113	1.42123	214.023	562.156	317.806	1.14522	0.037665	1.42406
inppl1a	ENSDARG00000104222	325179	Ens95only	257.746	506.328	379.83	1.05723	0.0315448	1.50107	67.4848	23.5084	37.6219	0.269738	0.826526	0.0827435
inppl1b	ENSDARG00000001442	368433	Both	700.565	1015.72	475.285	1.88865	2.5065e-05	4.60093	455.04	767.599	358.398	1.93123	6.95767e-05	4.15754
invs	ENSDARG00000002213	245946	Both	285.846	254.698	205.824	1.62422	0.000724606	3.1399	282.472	255.526	204.94	1.62504	0.000770588	3.11318
ip6k2b	ENSDARG00000019613	436662	Both	2633.66	4171.32	3210.66	1.1965	0.00267698	2.57235	2599.13	4185.51	3183.01	1.21156	0.00222141	2.65337
iqgap1	ENSDARG00000078888	100002928	Both	1550.35	3187.31	2365.49	1.72902	4.80645e-05	4.31818	252.586	833.013	725.707	1.81644	0.000615256	3.21094
iqsec1b	ENSDARG00000016551	100148736	Both	4023.16	8098.18	5417.06	1.48648	0.000392641	3.406	4019.2	8163.53	5410.63	1.47249	0.000438975	3.35756
irak1bp1	ENSDARG00000036903	553809	Both	157.942	206.623	137.216	1.39948	0.00930373	2.03134	156.179	203.398	135.637	1.45161	0.0082045	2.08595
irak3	ENSDARG00000053131	567444	Both	339.139	211.737	112.358	2.08219	0.00445683	2.35097	505.172	284.144	161.378	2.01414	0.00543778	2.26458
irf2bp2b	ENSDARG00000098635	406614	Both	2109.45	1355.32	1137.5	1.01753	0.0248308	1.60501	2081.42	1362.46	1132.62	1.02124	0.0223316	1.65108
irf8	ENSDARG00000056407	436895	Both	519.368	317.094	313.211	1.1565	0.0115034	1.93917	509.028	317.874	311.866	1.15739	0.0110315	1.95736
irf9	ENSDARG00000016457	403013	Both	425.378	869.452	569.746	1.54662	0.000670224	3.17378	424.19	875.942	571.259	1.55618	0.000633639	3.19816
irs2a	ENSDARG00000037099	393285	RefSeqOnly	281.97	383.582	325.143	0.604192	0.340033	0.468479	1091.33	1338.95	872.234	1.05782	0.0126284	1.89865
irs2b	ENSDARG00000075282	572001	Both	4818.69	3501.33	3225.58	1.20592	0.00144231	2.84094	4839.62	3558.96	3279.05	1.19619	0.00133729	2.87378
isca1	ENSDARG00000051956	573999	Ens95only	829.438	686.355	488.211	1.2572	0.00362508	2.44068	212.095	108.343	39.602	1.23424	0.142923	0.844896
iscub	ENSDARG00000026582	550498	Both	871.104	663.852	626.422	1.36342	0.00107938	2.96683	842.596	646.991	616.801	1.39301	0.000972086	3.0123
ism1	ENSDARG00000020541	497617	Both	1617.21	2764.86	2077.14	1.97367	5.39515e-07	6.268	1412.36	2590.01	1929.61	2.00765	7.94163e-07	6.10009
ism2a	ENSDARG00000089691	100535376	Both	166.663	251.63	230.682	1.69649	0.000299956	3.52294	77.1254	79.724	89.1045	1.35952	0.041274	1.38432
isoc2	ENSDARG00000013371	492617	Both	364.333	270.042	302.273	1.15977	0.0195943	1.70787	359.597	262.68	300.975	1.16538	0.0204517	1.68927
itga1	ENSDARG00000074316	570868	Both	231.584	191.279	204.83	2.38636	6.48621e-06	5.18801	310.43	382.266	420.771	2.65277	1.60167e-07	6.79543
itga10	ENSDARG00000002507	572348	Both	1721.86	1562.97	1566.05	2.4213	4.68222e-07	6.32955	1708.33	1567.9	1539.53	2.53199	1.21007e-07	6.91719
itga11a	ENSDARG00000036086	541475	Both	1142.42	1836.08	1147.45	2.74901	1.58654e-09	8.79955	1194.48	1897.02	1160.34	2.73443	1.5263e-09	8.81636
itga4	ENSDARG00000103056	100331333	Both	209.298	137.067	167.046	3.3646	2.88379e-10	9.54004	617.968	319.918	360.378	3.43194	5.37702e-13	12.2695
itga5	ENSDARG00000006353	386787	Both	1280.01	1932.23	1961.79	1.81804	1.20427e-05	4.91928	1259.07	1934.84	1945.45	1.82398	1.11595e-05	4.95236
itga8	ENSDARG00000078717	100141346	Both	204.453	376.421	394.745	2.49005	1.16005e-07	6.93552	779.931	2117.8	1894.96	2.57746	9.2254e-08	7.03501
itga9	ENSDARG00000032435	394012	Both	407.936	317.094	346.023	1.63221	0.000308419	3.51086	979.493	1704.87	1369.24	2.03705	1.1738e-06	5.9304
itgav	ENSDARG00000006314	100151255	Both	374.022	348.804	291.336	1.29526	0.00553369	2.25699	240.053	213.619	189.1	1.35862	0.00711944	2.14755
itgb1a	ENSDARG00000071863	556734	Both	3071.63	5010.09	4067.76	2.25248	2.95351e-08	7.52966	5353.47	7015.71	5726.45	2.19995	6.7572e-09	8.17023
itgb1b	ENSDARG00000104484	570216	Both	849.787	836.72	767.615	1.81206	1.86601e-06	5.72909	838.739	838.124	764.319	1.81832	1.71452e-06	5.76586
itgb1b.2	ENSDARG00000022689	405864	Both	288.753	148.318	389.774	1.55486	0.0257597	1.58906	288.256	149.227	388.1	1.56439	0.0257797	1.58872
itgb1bp1	ENSDARG00000007169	641420	Both	157.942	484.847	403.694	1.25479	0.0285954	1.5437	658.459	1051.74	772.239	1.01177	0.0159134	1.79824
itgb5	ENSDARG00000012942	563556	Both	728.665	1061.75	716.905	1.18601	0.00402857	2.39485	712.446	1059.92	712.836	1.20737	0.00337414	2.47184
itgbl1	ENSDARG00000040985	554050	Both	638.551	2218.64	1530.26	3.0558	1.75207e-09	8.75645	34.7065	155.36	74.2538	2.71417	0.000770758	3.11308
itih1	ENSDARG00000055053	564761	Both	2820.67	1659.12	1989.63	4.47391	4.10534e-24	23.3867	2765.91	1662.96	1960.3	4.52381	8.18467e-25	24.087
itih5	ENSDARG00000045517	555366	Both	225.77	195.371	256.535	1.7336	0.000514213	3.28886	231.376	203.398	266.324	1.76595	0.0003191	3.49607
ITLN1	ENSDARG00000095082	564958	Both	420.533	517.58	305.256	2.63684	8.05541e-10	9.09391	273.795	349.559	226.722	2.44092	1.52609e-07	6.81642
itln1	ENSDARG00000095082	564958	RefSeqOnly	8.72073	2.04577	2.98296	0.409617	1	0	273.795	349.559	226.722	2.44092	1.52609e-07	6.81642
itpr1a	ENSDARG00000014655	567611	Both	120.152	228.103	187.927	1.15969	0.0267895	1.57203	133.041	251.437	219.791	1.27066	0.012698	1.89627
itprip	ENSDARG00000015576	550570	Both	132.749	503.259	455.399	1.95232	0.0106985	1.97068	131.113	498.786	451.463	1.98423	0.00976439	2.01036
itsn1	ENSDARG00000000086	368504	RefSeqOnly	180.228	149.341	133.239	0.176187	0.8207	0.0858157	1252.32	2825.09	1969.21	1.44955	0.001189	2.92482
IYD	ENSDARG00000076056	100330940	Both	155.035	169.799	174.006	1.36937	0.00534385	2.27215	153.287	170.691	173.259	1.37453	0.00571583	2.24292
jag1a	ENSDARG00000030289	140421	Both	418.595	1166.09	557.814	1.87744	0.000557442	3.2538	413.585	1173.37	555.418	1.87654	0.000591669	3.22792
jag1b	ENSDARG00000013168	140423	Both	3115.24	2832.37	2650.86	1.46984	0.00104631	2.98034	3075.38	2847.58	2639.47	1.47502	0.000919917	3.03625
jak1	ENSDARG00000020625	30280	Both	4496.99	4186.67	3236.51	1.22387	0.00196916	2.70572	2473.8	2424.43	1959.31	1.22051	0.00241006	2.61797
jam2b	ENSDARG00000079071	100005301	Both	712.193	847.971	719.888	2.34547	3.2168e-07	6.49258	102.191	339.338	260.383	2.76797	4.1674e-06	5.38014
jcada	ENSDARG00000089871	100001168	Both	2498.97	4808.58	2761.23	2.58283	3.55439e-10	9.44923	2234.71	4620.92	2616.7	2.62192	4.10853e-10	9.38631
jmjd1cb	ENSDARG00000079939	558436	RefSeqOnly	5487.28	6239.6	4341.2	0.987879	0.00888429	2.05138	5285.02	6161.23	4221.58	1.01537	0.00656421	2.18282
jun	ENSDARG00000043531	335916	Both	41750	33891.2	25103.6	1.72684	0.00286086	2.5435	41202.3	34035	24988.9	1.73288	0.00254984	2.59349
jund	ENSDARG00000067850	564873	Both	16536.4	16791.7	10852	1.91145	0.000223428	3.65086	143.646	181.934	83.1642	1.54505	0.0306671	1.51333
kank1a	ENSDARG00000060102	777729	RefSeqOnly	874.011	1091.42	790.485	0.992924	0.0174962	1.75706	842.596	1049.7	774.219	1.09269	0.0064444	2.19082
kank2	ENSDARG00000018393	571549	Both	1497.06	1194.73	1525.29	1.5439	0.000297647	3.5263	1477.92	1200.97	1518.74	1.55065	0.000253682	3.59571
kank3	ENSDARG00000076566	558407	Both	313.946	466.435	390.768	1.4439	0.000761666	3.11824	308.502	468.123	389.09	1.51885	0.000471947	3.32611
kank4	ENSDARG00000059473	101884737	Both	281.001	183.096	208.807	1.46104	0.00890671	2.05028	275.723	196.244	202.96	1.45362	0.00843801	2.07376
kazald3	ENSDARG00000053509	100000101	Both	470.919	543.152	512.075	2.34606	2.56779e-07	6.59044	464.681	545.803	509.876	2.35533	2.55569e-07	6.59249
kcne4	ENSDARG00000068257	794240	Both	1320.71	570.77	781.536	5.08411	1.04325e-23	22.9816	135.934	54.1714	76.2339	5.79393	3.80188e-10	9.42
kcnj11	ENSDARG00000051880	664687	Both	42.6347	58.3044	108.381	1.98615	0.00549122	2.26033	42.419	58.2598	107.916	2.00256	0.00634724	2.19742
kcnj8	ENSDARG00000045589	561090	RefSeqOnly	52.3244	27.6179	18.8921	1.93786	0.0553708	1.25672	52.0597	28.6189	18.811	2.05316	0.0468106	1.32966
kcnk6	ENSDARG00000007383	504083	RefSeqOnly	33.9139	12.2746	37.7842	0.377165	0.800043	0.0968867	294.041	325.029	245.533	1.67907	7.8912e-05	4.10286
kcnq5a	ENSDARG00000069954	556841	Both	135.656	188.211	153.125	1.49469	0.0020899	2.67987	157.143	219.752	166.328	1.62187	0.000660153	3.18036
kcnq5b	ENSDARG00000069953	568646	Both	204.453	180.028	162.074	1.52741	0.00158845	2.79903	201.49	178.868	161.378	1.60784	0.000977713	3.00979
kctd10	ENSDARG00000017115	406787	Both	1065.87	1186.55	821.309	1.02924	0.00918886	2.03674	1027.7	1143.73	784.12	1.03616	0.0101928	1.99171
kctd12.2	ENSDARG00000053542	553403	Both	1122.07	1499.55	895.883	1.64687	0.00010811	3.96613	1107.71	1507.6	892.035	1.65237	0.00010501	3.97877
kctd3	ENSDARG00000060854	569113	Both	850.756	686.355	511.081	1.31358	0.00180522	2.74347	839.703	686.853	503.936	1.33208	0.00148922	2.82704
kdelc2	ENSDARG00000021408	566063	Both	240.305	582.021	411.649	1.53256	0.00160744	2.79386	233.304	579.532	400.97	1.53691	0.00181412	2.74133
kdelr3	ENSDARG00000040912	393613	Both	554.251	1067.89	1074.86	2.12625	2.82385e-06	5.54916	533.13	1085.47	1070.24	2.16304	2.61715e-06	5.58217
kdrl	ENSDARG00000105215	796537	Both	633.706	818.308	607.53	2.05224	9.70307e-08	7.01309	619.896	822.792	603.931	2.05852	1.0498e-07	6.97889
khnyn	ENSDARG00000092488	100536128	Ens95only	547.468	628.051	359.944	1.12202	0.0115905	1.9359	30.8502	9.19892	7.9204	-0.269491	0.884542	0.0532813
KIAA0895L	ENSDARG00000059529	562097	RefSeqOnly	115.307	76.7163	108.381	0.740541	0.258886	0.586892	254.514	402.708	238.602	1.00569	0.0412007	1.3851
kif13a	ENSDARG00000069594	100331282	RefSeqOnly	133.718	65.4646	85.5115	0.403526	0.635094	0.197162	721.123	1146.8	780.16	1.15091	0.00479441	2.31926
kif26aa	ENSDARG00000042368	567643	Both	614.327	570.77	447.444	1.48603	0.000429769	3.36677	610.255	561.134	437.602	1.50322	0.000448836	3.34791
kif26ba	ENSDARG00000013343	569545	Both	4074.52	2738.26	3078.42	1.52079	0.000193281	3.71381	2554.78	1778.46	1905.85	1.53038	7.41279e-05	4.13002
kirrel1a	ENSDARG00000001634	405804	Both	4959.19	6256.98	5533.39	1.29603	0.000516965	3.28654	4594.75	6060.04	5240.34	1.36128	0.000253682	3.59571
kitlga	ENSDARG00000070917	553179	Both	277.125	509.396	328.126	1.64522	0.000443473	3.35313	273.795	512.073	326.717	1.6497	0.000492724	3.3074
klf11b	ENSDARG00000013794	559076	Both	3958.24	3792.86	3283.25	1.69262	0.00188414	2.72489	3911.22	3818.57	3263.21	1.70047	0.00165806	2.7804
klf12a	ENSDARG00000015312	798629	Both	539.716	1008.56	631.393	1.92302	1.18335e-05	4.92689	443.471	932.157	576.209	1.92428	3.75501e-05	4.42539
klf15	ENSDARG00000091127	335901	Both	488.361	252.652	456.393	1.23581	0.0241934	1.6163	482.034	254.503	455.423	1.23349	0.024307	1.61427
klf2a	ENSDARG00000042667	117508	Both	3647.2	8603.48	4514.21	1.96444	2.6105e-05	4.58328	3599.83	8648.01	4494.83	1.97425	2.4036e-05	4.61914
klf2b	ENSDARG00000040432	117509	Both	3902.04	4605.03	3522.88	2.31592	2.70183e-06	5.56834	3844.7	4612.75	3486.96	2.34656	1.94007e-06	5.71218
klf3	ENSDARG00000015495	117603	Both	1891.43	2025.31	1477.56	1.2489	0.00441424	2.35514	1865.47	1999.23	1450.42	1.26735	0.00414174	2.38282
klf6a	ENSDARG00000029072	280650	Both	9830.2	9572.15	7482.26	1.45483	0.00147532	2.83111	9698.53	9630.25	7447.16	1.46004	0.00129318	2.88834
klf9	ENSDARG00000068194	565869	Both	342.046	291.522	285.37	1.3491	0.001892	2.72308	326.819	276.99	282.164	1.31502	0.00289126	2.53891
klhl21	ENSDARG00000039255	404613	Both	1005.79	1053.57	806.394	1.1113	0.00309936	2.50873	992.99	1058.9	802.931	1.11503	0.00277338	2.55699
klhl35	ENSDARG00000063577	570873	RefSeqOnly	32.945	16.3662	18.8921	0.2474	0.873146	0.0589131	202.454	242.238	179.199	1.14292	0.017798	1.74963
klhl41b	ENSDARG00000006757	321064	Both	861.414	672.035	767.615	1.2734	0.00141354	2.84969	842.596	674.587	753.428	1.3306	0.000926973	3.03293
kremen1	ENSDARG00000062579	100141352	Ens95only	412.781	557.472	545.882	1.00059	0.0495149	1.30526	403.945	548.869	511.856	0.995513	0.0549335	1.26016
krt18a.1	ENSDARG00000018404	352912	Both	6733.37	14779.7	9902.44	1.18441	0.0250993	1.60034	6646.29	14845	9857.93	1.19547	0.0230572	1.63719
krt18b	ENSDARG00000028618	393540	Both	6475.63	10238.1	5903.28	1.77996	1.19224e-05	4.92364	6291.51	10132.1	5826.45	1.78157	1.13637e-05	4.94448
krt5	ENSDARG00000058371	797351	Both	3882.66	2985.8	3467.19	1.70459	1.11272e-05	4.95362	3841.81	3070.4	3504.78	1.71076	8.06043e-06	5.09364
krt8	ENSDARG00000058358	797433	Both	29766.8	46198.6	30657.9	1.56151	0.000137181	3.86271	29375.2	46262.4	30449	1.56941	0.000119267	3.92348
krtt1c19e	ENSDARG00000090268	553371	Both	2235.41	2158.29	1717.19	2.49326	4.37644e-05	4.35888	2205.79	2168.9	1709.82	2.49852	4.0431e-05	4.39328
ksr1b	ENSDARG00000030933	556779	Ens95only	213.173	168.776	190.91	1.08265	0.0241464	1.61715	140.754	149.227	165.338	0.954204	0.0621521	1.20654
l3hypdh	ENSDARG00000103763	565785	RefSeqOnly	0	51.1442	39.7728	1.37116	0.429245	0.367295	137.862	229.973	165.338	1.17869	0.023474	1.62941
l3mbtl2	ENSDARG00000056079	568473	Both	2027.09	2200.22	2173.58	2.92414	6.05111e-14	13.2182	446.364	439.504	388.1	1.52892	0.000135453	3.86821
lama4	ENSDARG00000020785	566796	Both	9922.25	9798.21	7482.26	2.95539	3.47243e-16	15.4594	9793	9848.98	7451.12	2.96131	1.80907e-16	15.7425
lamb1a	ENSDARG00000101209	286830	Both	3591.97	6965.84	4638.5	2.52074	8.98572e-10	9.04645	3545.84	7001.4	4618.59	2.52976	7.69715e-10	9.11367
lamb1b	ENSDARG00000045524	556605	Both	3038.69	2387.41	1733.1	3.50758	1.15854e-18	17.9361	2999.22	2399.9	1725.66	3.51638	4.76094e-19	18.3223
lamc1	ENSDARG00000036279	286832	Both	624.017	2245.23	1603.84	2.04873	0.000228383	3.64134	505.172	1709.98	1273.2	2.0075	0.000473901	3.32431
lamc3	ENSDARG00000093572	558958	Both	1846.86	3599.53	3015.77	3.35574	2.33961e-12	11.6309	5695.71	10528.7	7456.07	3.41955	5.04763e-15	14.2969
lamp2	ENSDARG00000014914	541406	Both	748.045	1323.61	1167.33	1.32811	0.00113021	2.94684	911.044	1744.73	1471.22	1.13459	0.00998375	2.00071
lasp1	ENSDARG00000057867	323216	Both	5325.46	5641.21	4337.23	1.26505	0.00144231	2.84094	5231.03	5612.36	4283.95	1.2708	0.00128	2.89279
lats2	ENSDARG00000078864	567674	RefSeqOnly	51.3554	37.8467	36.7899	-0.141578	0.906356	0.042701	2801.58	4472.72	3054.31	1.78923	3.01205e-05	4.52114
laynb	ENSDARG00000056835	567867	RefSeqOnly	15.5035	26.595	54.6876	1.715	0.131118	0.882339	79.0536	100.166	114.846	1.43832	0.0184637	1.73368
lbh	ENSDARG00000111701	393492	RefSeqOnly	0	0	2.98296	0.614942	1	0	873.446	410.885	489.085	2.79136	3.24977e-07	6.48815
ldlra	ENSDARG00000029476	387529	Both	3518.33	3313.12	2432.11	2.03628	0.000809777	3.09163	3559.34	3403.6	2497.9	2.03084	0.00076732	3.11502
ldlrap1a	ENSDARG00000004311	368278	Both	688.938	900.138	662.217	1.35614	0.000928747	3.0321	680.632	908.649	659.374	1.34242	0.00111996	2.9508
lepa	ENSDARG00000091085	100150233	Both	407.936	713.973	228.694	1.99347	0.0106616	1.97218	449.256	917.848	263.353	1.93087	0.00786274	2.10443
lepb	ENSDARG00000045548	564348	Both	132.749	37.8467	45.7387	3.73404	5.355e-05	4.27124	133.041	38.8399	45.5423	3.73625	7.49206e-05	4.1254
lepr	ENSDARG00000070961	567241	Both	505.802	556.449	537.927	1.55492	9.81528e-05	4.0081	499.387	556.024	532.647	1.56545	9.07709e-05	4.04205
letmd1	ENSDARG00000030641	567014	RefSeqOnly	57.1692	16.3662	15.9091	0.629106	0.645004	0.190438	471.429	342.404	287.115	1.19659	0.00711944	2.14755
lgals1l1	ENSDARG00000088711	326706	Both	64.921	72.6248	127.273	1.77401	0.0379113	1.42123	64.5926	72.5693	126.726	1.80166	0.0393258	1.40532
lgals9l3	ENSDARG00000041060	327284	Both	474.795	814.216	588.638	1.70982	0.000268844	3.5705	468.537	818.704	586.11	1.71901	0.00026295	3.58013
lgr4	ENSDARG00000060542	558825	Both	1995.11	2248.3	1755.97	1.07149	0.00322114	2.49199	1976.34	2262.93	1768.23	1.06283	0.00320347	2.49438
lgsn	ENSDARG00000007715	567024	Both	96.897	188.211	154.12	1.98358	0.00817364	2.08758	96.4068	189.089	154.448	1.99356	0.00854578	2.06825
lhfpl2a	ENSDARG00000009653	402962	Both	1145.32	1775.73	718.894	1.663	0.000292975	3.53317	1130.85	1802.99	720.757	1.66313	0.000308692	3.51047
lhfpl2b	ENSDARG00000098153	550224	Both	248.056	838.765	543.893	1.54277	0.00434604	2.36191	244.873	844.256	541.558	1.55054	0.00438902	2.35763
lifrb	ENSDARG00000039863	565104	Both	1396.29	1754.25	1236.93	2.25859	2.76638e-05	4.55809	1183.88	1616.97	1171.23	2.25505	3.70427e-05	4.4313
lims1	ENSDARG00000026985	554019	Both	3930.14	4846.43	4982.54	1.585	6.03923e-05	4.21902	3878.45	4852.94	4937.38	1.5949	4.88471e-05	4.31116
lims2	ENSDARG00000014976	553696	Both	99.8039	168.776	84.5172	1.46331	0.0127096	1.89587	101.227	169.669	84.1543	1.47761	0.0135729	1.86733
lipeb	ENSDARG00000101145	557893	Both	213.173	169.799	163.069	1.38403	0.00568118	2.24556	225.592	180.912	165.338	1.24697	0.010853	1.96445
lipf	ENSDARG00000018529	406713	Both	563.941	721.134	633.382	1.42945	0.00071673	3.14464	557.231	724.671	630.662	1.4388	0.000673502	3.17166
litaf	ENSDARG00000103483	431731	Ens95only	1076.53	1051.53	790.485	1.13552	0.0123522	1.90825	1115.43	1039.48	771.249	0.991014	0.0337601	1.4716
lix1l	ENSDARG00000063244	572161	RefSeqOnly	141.47	105.357	57.6706	1.03391	0.164779	0.783099	1063.37	2106.55	1165.29	1.57069	0.000275712	3.55954
lmbr1l	ENSDARG00000004745	321314	Both	422.471	449.046	441.478	1.19444	0.010193	1.9917	415.513	451.769	439.582	1.21567	0.00935836	2.0288
lmcd1	ENSDARG00000002002	394045	Both	387.588	478.71	296.307	1.40441	0.00418605	2.3782	382.735	481.41	296.025	1.4039	0.00426807	2.36977
lmo4a	ENSDARG00000013853	114412	Both	1190.86	2082.59	1852.42	1.41109	0.000540036	3.26758	1124.1	2067.71	1829.61	1.42587	0.000548029	3.2612
lmod1b	ENSDARG00000077261	795335	Both	200.577	238.332	161.08	2.11546	1.48334e-05	4.82876	276.688	305.609	265.334	2.31234	7.16998e-07	6.14448
lmx1ba	ENSDARG00000104815	554361	Both	427.316	437.795	390.768	3.41568	1.98499e-14	13.7022	441.543	449.725	397.01	3.31352	4.26767e-14	13.3698
lmx1bb	ENSDARG00000068365	554360	Both	1182.14	1434.08	1019.18	2.63099	9.99878e-13	12.0001	706.662	925.003	706.896	2.65646	8.27478e-12	11.0822
LO018513.1	ENSDARG00000059081	100002503	RefSeqOnly	8.72073	2.04577	6.96024	-1.02953	0.563991	0.248728	234.269	107.321	94.0548	2.65262	1.96e-05	4.70774
lonrf1l	ENSDARG00000078567	100317496	Both	4474.7	1610.02	937.644	1.6557	0.00597756	2.22348	4410.61	1613.9	926.687	1.66727	0.00520816	2.28332
loxa	ENSDARG00000003259	404621	Both	935.056	1211.1	786.507	2.34707	1.20433e-07	6.91925	918.757	1217.32	781.15	2.34987	1.18874e-07	6.92491
loxl1	ENSDARG00000054451	560115	Ens95only	2952.45	4683.79	3394.61	1.68726	5.69631e-05	4.24441	178.353	130.829	192.07	1.11559	0.0798863	1.09753
loxl2a	ENSDARG00000044010	565508	Both	269.374	80.8079	85.5115	1.84308	0.00730826	2.13619	2919.2	2393.76	3026.58	2.27097	3.56093e-10	9.44844
loxl2b	ENSDARG00000044074	791144	Both	2307.12	4941.55	3342.9	2.09203	4.13726e-06	5.38329	2268.45	4937.78	3316.67	2.09642	3.38196e-06	5.47083
loxl3b	ENSDARG00000039563	336266	Both	3396.24	3247.66	2863.64	3.15715	3.3813e-16	15.4709	3373.27	3272.77	2862.24	3.15851	2.35995e-16	15.6271
loxl4	ENSDARG00000025089	100320658	Both	716.069	1377.83	798.439	1.55772	0.000929493	3.03175	706.662	1389.04	795.011	1.57069	0.000871574	3.0597
loxl5b	ENSDARG00000076904	100124531	RefSeqOnly	87.2073	65.4646	74.574	0.851017	0.288735	0.5395	52.0597	64.3924	44.5523	1.57578	0.0476314	1.32211
lpar1	ENSDARG00000099840	368461	Both	419.564	678.172	623.439	1.60329	0.000885282	3.05292	356.705	582.598	542.548	1.63984	0.00121673	2.9148
lpar2a	ENSDARG00000042338	445184	Both	407.936	440.863	366.904	1.31914	0.00127996	2.8928	394.304	424.172	351.468	1.43097	0.000573119	3.24175
lpar6a	ENSDARG00000062552	571773	Both	390.495	807.056	639.348	1.47185	0.00118337	2.92688	385.627	809.505	632.642	1.49174	0.00111875	2.95127
lpl	ENSDARG00000087697	30354	Both	11910.6	11811.2	8838.51	2.33053	3.59634e-11	10.4441	856.092	2559.34	1730.61	2.37655	1.1168e-05	4.95202
lpp	ENSDARG00000023578	573024	Both	3444.69	3423.59	2915.35	2.13682	5.8605e-08	7.23207	1336.2	1037.43	870.254	2.03485	2.30831e-05	4.63671
lrig3	ENSDARG00000079363	564554	RefSeqOnly	22.2863	34.7781	31.8183	0.777035	0.520449	0.283621	484.926	417.018	376.219	1.81033	2.67112e-05	4.57331
lrp10	ENSDARG00000054539	560361	Both	1320.71	1259.17	941.621	1.13686	0.0035705	2.44727	1303.42	1265.36	937.578	1.14213	0.00317555	2.49818
lrp1aa	ENSDARG00000097827	563149	Both	6695.58	6220.16	6015.64	1.82948	1.7403e-06	5.75938	6562.41	6009.96	5830.41	1.81381	1.95523e-06	5.7088
lrp1ab	ENSDARG00000029146	565797	Both	2178.24	1505.69	1503.41	1.69783	7.66504e-06	5.11549	8380.64	6628.33	5833.38	1.90832	5.5532e-07	6.25546
lrp1ba	ENSDARG00000004789	565136	RefSeqOnly	112.401	32.7323	69.6024	0.126622	0.919366	0.0365116	696.057	510.029	468.294	1.72084	4.12634e-05	4.38444
lrp5	ENSDARG00000006921	568518	Both	4676.25	4730.84	4146.32	1.56875	3.09184e-05	4.50978	791.5	301.52	400.97	1.16208	0.0476119	1.32228
lrrc1	ENSDARG00000102684	541316	Both	397.278	526.786	286.364	1.03273	0.0330392	1.48097	410.693	538.648	295.035	1.02861	0.0337098	1.47224
lrrc15	ENSDARG00000070792	791200	Both	130.811	155.478	244.603	1.35902	0.0118265	1.92714	95.4427	156.382	239.592	1.31158	0.0311492	1.50655
lrrc17	ENSDARG00000037960	321202	Both	1388.53	3340.74	1937.93	2.21552	1.23684e-06	5.90769	1373.8	3357.61	1929.61	2.22571	1.12925e-06	5.94721
lrrc58b	ENSDARG00000063509	564300	Both	2860.4	1796.19	1418.9	2.00317	1.19737e-05	4.92177	7620.96	6674.33	4831.45	2.24965	5.81715e-09	8.23529
lrrc59	ENSDARG00000071426	405868	Both	663.744	470.527	481.251	1.01437	0.0279172	1.55413	633.393	468.123	473.244	1.03384	0.0233709	1.63132
LRRC75A	ENSDARG00000076834	562936	Both	303.288	488.939	315.2	1.47634	0.000742822	3.12912	296.933	488.565	304.936	1.55805	0.000480217	3.31856
lrrc8aa	ENSDARG00000032188	327642	Both	610.451	623.96	503.126	1.21239	0.00571981	2.24262	602.543	626.549	500.966	1.22426	0.00488989	2.3107
lrrc8c	ENSDARG00000099911	571216	Both	157.942	256.744	189.915	1.92961	0.000835261	3.07818	858.985	1810.14	1497.95	2.01145	1.99478e-06	5.7001
lrrc8da	ENSDARG00000103370	497399	Ens95only	188.949	209.691	211.79	1.10243	0.0170171	1.76912	60.7363	36.7957	23.7612	0.5362	0.629441	0.201045
lsp1	ENSDARG00000027310	100536902	Both	1846.86	3072.74	2107.96	1.60615	0.000195507	3.70884	1824.98	3081.64	2095.94	1.62269	0.000164917	3.78273
LT631684.1	ENSDARG00000108326	557305	RefSeqOnly	34.8829	4.09154	1.98864	0.375517	0.873142	0.0589154	188.957	438.482	171.279	1.76074	0.00354538	2.45034
ltbp1	ENSDARG00000056922	562072	Both	225.77	588.159	549.859	1.56751	0.0118117	1.92769	1613.85	3459.82	2581.06	1.98192	1.06337e-05	4.97332
lum	ENSDARG00000045580	415149	Both	2596.84	11416.4	5086.94	2.06717	0.000406453	3.39099	1901.14	9624.11	4427.51	2.10082	0.000626501	3.20308
lurap1	ENSDARG00000115301	100126029	Both	749.983	932.871	667.189	1.8525	0.000118176	3.92747	58.8082	77.6798	80.1941	1.54174	0.0208879	1.6801
luzp1	ENSDARG00000075556	558606	Both	2814.86	3773.42	2691.63	1.72647	2.71201e-06	5.56671	2788.08	3800.18	2685.02	1.73231	2.18702e-06	5.66015
lxn	ENSDARG00000043102	494053	Both	6110.32	3669.09	2946.17	2.6823	1.38051e-07	6.85996	5992.65	3661.17	2928.57	2.70525	1.13807e-07	6.94383
lysmd3	ENSDARG00000024693	415194	Both	1060.05	1136.42	982.388	1.47962	0.000324291	3.48906	1055.65	1144.75	990.05	1.47694	0.00031712	3.49878
lysmd4	ENSDARG00000068702	100149102	Both	240.305	460.298	247.586	1.74689	0.000264404	3.57773	250.658	464.034	255.433	1.71734	0.000292234	3.53427
mafba	ENSDARG00000017121	30210	Both	2609.44	2452.88	2167.62	1.51109	3.3221e-05	4.47859	2575.03	2466.33	2158.31	1.51759	2.55797e-05	4.5921
maff	ENSDARG00000028957	393307	Both	2516.42	5289.34	3369.75	1.74551	0.00201962	2.69473	2480.55	5314.93	3355.28	1.75599	0.00183114	2.73728
magt1	ENSDARG00000058062	324944	Both	752.89	1331.8	1088.78	1.22439	0.00380278	2.4199	743.297	1335.89	1085.1	1.244	0.00323951	2.48952
mamdc2b	ENSDARG00000073695	798369	Both	388.557	1346.12	427.558	1.5408	0.02077	1.68256	383.699	1357.35	425.722	1.54995	0.0203092	1.69231
mao	ENSDARG00000023712	404730	Both	2805.17	1813.57	1333.38	2.18957	3.00052e-06	5.5228	2768.8	1822.41	1327.66	2.19381	2.48779e-06	5.60419
map1lc3a	ENSDARG00000033609	406466	Both	1349.78	2393.55	1864.35	1.55485	6.97122e-05	4.15669	1332.34	2405.01	1857.33	1.56202	6.53911e-05	4.18448
map1lc3b	ENSDARG00000101127	322425	Both	3008.65	3534.07	2652.85	1.02665	0.00725434	2.1394	2970.29	3551.81	2641.45	1.03325	0.00643606	2.19138
map3k14a	ENSDARG00000074060	100004261	Both	786.804	1237.69	719.888	1.45707	0.00097426	3.01133	778.003	1245.94	729.667	1.46851	0.000819755	3.08632
map3k3	ENSDARG00000060348	560211	RefSeqOnly	142.439	197.417	183.949	1.12069	0.0518798	1.285	852.236	1117.16	969.259	1.29835	0.00467063	2.33062
map4k3a	ENSDARG00000087742	558281	Ens95only	269.374	803.987	448.438	1.23918	0.0370952	1.43068	32.7783	35.7736	30.6916	-0.0377963	0.979387	0.00904555
map4k5	ENSDARG00000039125	334565	Both	562.003	1077.1	564.774	1.28778	0.0062526	2.20394	553.375	1074.23	559.379	1.29209	0.00657584	2.18205
map7d1b	ENSDARG00000104701	796270	Both	1255.79	1040.27	849.15	1.11774	0.0138192	1.85952	675.812	562.156	508.886	1.25846	0.00169261	2.77144
mapk14b	ENSDARG00000028721	266756	Both	941.839	981.969	875.002	1.11604	0.00284399	2.54607	824.278	903.538	753.428	1.22543	0.00101239	2.99465
marcksl1a	ENSDARG00000039034	406407	Both	17873.6	22481	13655	1.55849	4.6639e-05	4.33125	17636.7	22593.6	13597.4	1.56527	3.96202e-05	4.40208
marveld1	ENSDARG00000011724	497317	Both	826.531	1348.16	937.644	2.28508	2.64857e-05	4.57699	815.602	1355.31	933.618	2.29173	2.44532e-05	4.61167
marveld2a	ENSDARG00000025076	558720	RefSeqOnly	421.502	599.41	469.319	0.990316	0.030287	1.51874	379.843	586.687	452.453	1.04129	0.0252793	1.59723
mast2	ENSDARG00000074311	100001267	Ens95only	2126.89	1193.71	1235.94	1.70431	3.67012e-05	4.43532	2326.3	1547.46	1493.99	0.938184	0.0343265	1.46437
mat2al	ENSDARG00000063665	678634	Both	203.484	351.872	239.631	1.1419	0.0325682	1.48721	201.49	353.647	238.602	1.15124	0.0333456	1.47696
matn1	ENSDARG00000030215	403023	Both	77383.9	59326.3	59376.8	5.76558	5.6083e-37	36.2512	76475.7	59811.4	59200.1	5.77252	7.03859e-38	37.1525
matn4	ENSDARG00000015947	497348	Both	25769.8	80701.5	42681.2	3.3015	1.06215e-09	8.97381	25349.2	81210.1	42404.9	3.32106	8.76488e-10	9.05725
mcamb	ENSDARG00000005368	338313	Both	1889.49	2329.11	1788.78	2.42867	4.28323e-11	10.3682	1876.08	2361.06	1799.91	2.44581	2.947e-11	10.5306
mcfd2	ENSDARG00000039757	449676	Both	341.077	788.644	657.246	1.10583	0.0260112	1.58484	211.131	381.244	332.657	1.20336	0.0124643	1.90433
mcl1a	ENSDARG00000009779	58122	Both	27811.4	14729.5	18123.5	1.88821	0.00241055	2.61788	27354.5	14150	17323.9	1.89412	0.00226061	2.64578
mcl1b	ENSDARG00000008363	373102	Both	7448.47	5897.95	4614.64	1.87572	4.61578e-06	5.33576	5686.07	4916.31	3687.94	1.97614	6.21672e-06	5.20644
mctp1a	ENSDARG00000076404	103911113	Both	293.598	591.227	755.683	1.47327	0.00240178	2.61947	296.933	589.753	749.468	1.50489	0.00175113	2.75668
MDFI	ENSDARG00000089564	100537791	Both	1844.92	3093.2	2337.65	2.29848	8.45964e-09	8.07265	756.793	1124.31	849.463	2.38407	1.21666e-07	6.91483
MDFIC	ENSDARG00000074223	100150512	Ens95only	1023.23	1437.15	939.633	1.61381	3.82551e-05	4.41731	24.1017	14.3094	35.6418	0.619598	0.648515	0.18808
mdka	ENSDARG00000036036	30277	Both	10099.6	18787.3	14500.2	1.56768	5.06895e-05	4.29508	9943.4	18841.4	14416.1	1.58147	4.23803e-05	4.37284
mef2aa	ENSDARG00000031756	30564	Ens95only	1557.13	1119.04	1139.49	1.01377	0.0210025	1.67773	5461.45	4490.1	4676.01	0.973679	0.0203066	1.69236
mef2cb	ENSDARG00000009418	798771	RefSeqOnly	1387.57	1320.54	1290.63	0.953486	0.0209685	1.67843	1368.01	1320.56	1274.19	1.02995	0.00935823	2.02881
megf6a	ENSDARG00000079199	565108	Ens95only	138.563	274.133	210.796	1.55057	0.00865271	2.06285	278.616	460.968	327.707	0.715294	0.167573	0.775797
megf6b	ENSDARG00000074808	557764	RefSeqOnly	31.976	84.8994	99.432	0.835222	0.376982	0.423679	180.281	238.15	285.135	1.14047	0.0223838	1.65007
meis1a	ENSDARG00000002937	170455	Both	1049.39	1451.47	770.598	1.00477	0.0368168	1.43395	1031.55	1457.52	772.239	1.03688	0.030571	1.51469
meltf	ENSDARG00000075159	565942	RefSeqOnly	35.8519	33.7552	75.5683	1.69681	0.0607423	1.21651	545.663	209.531	358.398	2.92819	1.29257e-08	7.88855
mertka	ENSDARG00000074695	100322133	Both	963.156	931.848	983.383	1.0339	0.0123727	1.90754	309.466	301.52	334.637	1.14792	0.0268047	1.57179
metrnla	ENSDARG00000101914	406258	Both	1133.69	1680.6	1204.12	1.14766	0.00420939	2.37578	1117.35	1688.51	1195.98	1.17461	0.00337705	2.47146
mettl24	ENSDARG00000075817	100000285	Both	128.873	106.38	108.381	1.64802	0.0029073	2.53651	127.257	110.387	107.916	1.59125	0.00443714	2.3529
mfap5	ENSDARG00000090560	100536858	Both	2045.5	1594.68	1248.87	2.28718	0.000740315	3.13058	1989.84	1547.46	1220.73	2.29179	0.000917858	3.03722
mfrp	ENSDARG00000087814	101885305	RefSeqOnly	2.90691	26.595	8.94888	0.573459	0.780806	0.107457	321.035	163.536	169.299	2.54255	3.6939e-06	5.43252
mfsd2aa	ENSDARG00000030630	492810	RefSeqOnly	8.72073	32.7323	55.6819	1.54508	0.239289	0.621077	311.394	368.979	649.473	3.08778	4.88359e-09	8.31126
mgat1a	ENSDARG00000012407	393649	Both	875.949	1177.34	813.354	1.48541	0.00105225	2.97788	864.769	1183.59	810.851	1.49349	0.000975679	3.01069
mgst1.1	ENSDARG00000032618	449784	Both	359.488	574.861	543.893	1.16784	0.0248435	1.60479	422.262	631.659	559.379	1.15464	0.0243441	1.61361
mgst1.2	ENSDARG00000022165	431762	Both	1310.05	846.948	1105.68	1.44372	0.0176459	1.75336	1292.82	851.411	1100.94	1.44578	0.0171812	1.76495
mhc1laa	ENSDARG00000016056	550603	Both	72.6727	180.028	113.353	1.38425	0.0224309	1.64915	72.3051	180.912	112.866	1.38946	0.0245555	1.60985
mia	ENSDARG00000052437	569807	Both	11412.5	1771.64	2607.11	6.73049	1.8813e-18	17.7255	11265.1	1780.5	2595.91	6.72247	1.14516e-18	17.9411
micall2b	ENSDARG00000017834	556298	Both	261.622	273.11	166.051	1.17731	0.0173802	1.75994	256.442	264.724	150.488	1.17067	0.0238628	1.62228
midn	ENSDARG00000018524	323713	Both	12157.7	15444.5	10574.6	1.28802	0.00283397	2.54761	12308.3	15878.4	10753.9	1.29752	0.00245074	2.6107
mindy4b	ENSDARG00000112337	569648	Ens95only	131.78	79.785	127.273	1.23774	0.0321163	1.49327	30.8502	15.3315	25.7413	1.10504	0.390066	0.408862
minpp1a	ENSDARG00000057058	561891	Both	505.802	799.896	623.439	1.28768	0.00190119	2.72097	527.345	808.483	644.523	1.28415	0.00154818	2.81018
mipol1	ENSDARG00000104845	321390	Both	165.694	321.186	269.461	1.2048	0.0150632	1.82208	168.712	322.984	268.304	1.19859	0.0166963	1.77738
mknk1	ENSDARG00000018411	555974	Both	3318.72	1451.47	1923.02	1.99914	0.00114832	2.93994	3294.22	1455.47	1918.72	1.99743	0.000975202	3.01091
mknk2b	ENSDARG00000015164	373121	Both	17666.3	8947.17	10123.2	1.68492	0.000950882	3.02187	1915.6	1979.81	2235.53	1.63303	0.00328576	2.48336
mkxa	ENSDARG00000075450	799136	Both	549.406	1594.68	1112.64	1.92995	0.000161291	3.79239	533.13	1592.44	1088.07	1.96004	0.000146716	3.83352
mllt3	ENSDARG00000006754	550517	Ens95only	494.175	779.438	510.086	1.03813	0.0213988	1.66961	489.747	796.218	517.796	0.97908	0.0338289	1.47071
mmel1	ENSDARG00000105389	560703	Both	2457.31	1287.81	1259.8	2.13606	2.17073e-06	5.66339	2419.81	1292.96	1246.47	2.14482	1.60811e-06	5.79369
mmp13b	ENSDARG00000100794	100006896	Ens95only	56.2003	49.0985	88.4945	1.90806	0.00908837	2.04151	13.497	39.862	54.4528	1.60316	0.159833	0.796333
mmp14a	ENSDARG00000002235	373882	Both	7091.89	11487	7519.05	2.22587	6.07934e-08	7.21614	6933.58	11511.9	7453.1	2.2331	5.3319e-08	7.27312
mmp14b	ENSDARG00000008388	566945	Both	3335.19	6246.76	4406.83	1.78393	8.20352e-05	4.086	2513.33	5517.31	3918.62	1.8291	0.000103163	3.98648
mmp15a	ENSDARG00000051962	561041	RefSeqOnly	92.0521	82.8536	85.5115	1.0352	0.118577	0.925999	1843.3	3680.59	1730.61	2.22462	2.66344e-07	6.57456
mmp2	ENSDARG00000017676	337179	Both	6973.68	19161.7	11784.7	2.38796	1.23684e-06	5.90769	6878.63	19259.5	11734.1	2.3988	1.09744e-06	5.95962
MMP23B	ENSDARG00000043079	101882601	Both	44.5726	98.1969	156.108	2.69671	0.000105861	3.97526	321.999	490.609	539.578	2.68607	1.68458e-08	7.77351
mmrn2a	ENSDARG00000076135	100148368	RefSeqOnly	199.608	321.186	300.285	0.957429	0.118737	0.925415	594.83	737.958	540.568	1.12989	0.0210675	1.67639
mob2a	ENSDARG00000023214	436637	Both	312.008	144.227	191.904	1.30709	0.0268839	1.57051	949.607	681.742	717.787	1.14895	0.00521447	2.28279
mob2b	ENSDARG00000012005	724012	Both	1784.84	2099.98	1615.77	1.9196	6.0142e-07	6.22082	1768.1	2113.71	1611.8	1.92329	5.10615e-07	6.29191
mob3a	ENSDARG00000019113	325366	Both	839.128	785.575	742.757	1.0476	0.00570863	2.24347	615.075	619.394	620.762	1.18424	0.00238159	2.62313
mob3c	ENSDARG00000043705	431738	Both	374.022	387.673	217.756	1.74343	0.000599835	3.22197	378.879	389.421	223.751	1.74377	0.000530748	3.27511
mocos	ENSDARG00000057148	100331902	Both	160.849	138.089	108.381	1.36512	0.0112894	1.94733	120.509	96.0776	74.2538	1.44428	0.0188255	1.72525
mosmob	ENSDARG00000035837	767723	Both	309.101	356.987	295.313	1.40632	0.00366284	2.43618	235.233	264.724	236.622	1.37962	0.00497884	2.30287
moxd1	ENSDARG00000031136	570584	Both	264.529	538.037	288.353	2.13802	1.28913e-05	4.8897	263.191	533.537	287.115	2.18569	8.01567e-06	5.09606
mpdu1a	ENSDARG00000035562	447806	Both	744.169	1033.11	777.558	1.75501	8.06313e-06	5.0935	734.62	1038.46	774.219	1.76254	7.64489e-06	5.11663
mprip	ENSDARG00000105209	562530	Both	1852.67	1723.56	1484.52	1.22292	0.000662449	3.17885	1054.69	829.947	688.085	1.08031	0.00976444	2.01035
MPRIP	ENSDARG00000105209	562530	Both	999.008	776.369	672.161	1.09789	0.0118821	1.92511	1054.69	829.947	688.085	1.08031	0.00976444	2.01035
mrc2	ENSDARG00000078135	100004793	Both	130.811	144.227	61.6479	1.67199	0.00803125	2.09522	206.311	226.907	86.1344	1.80764	0.00451349	2.34549
mrtfbb	ENSDARG00000076867	557356	Both	902.111	700.676	655.257	1.78109	1.6839e-06	5.77368	891.763	710.361	663.334	1.78536	1.22628e-06	5.91141
ms4a17a.11	ENSDARG00000094809	550363	Both	3219.89	4468.98	2191.48	2.10166	1.60968e-07	6.79326	3192.03	4514.63	2189.99	2.11053	1.37749e-07	6.86091
ms4a17a.7	ENSDARG00000043796	550409	Both	1085.25	1613.09	1029.12	1.65174	0.000408595	3.38871	2473.8	5159.57	2299.89	1.82328	9.36571e-05	4.02846
ms4a17a.8	ENSDARG00000043802	100002785	Both	1801.32	1331.8	1422.87	1.62445	0.0029818	2.52552	1775.81	1338.95	1413.79	1.63593	0.00253905	2.59533
ms4a17a.9	ENSDARG00000094854	541383	Both	3421.43	6421.67	2101.99	1.84391	0.000130527	3.8843	3374.24	6431.07	2081.09	1.8657	0.000110941	3.95491
msc	ENSDARG00000110016	556396	Both	195.732	631.12	188.921	1.38836	0.0261684	1.58222	151.359	490.609	150.488	1.32459	0.0410275	1.38692
msna	ENSDARG00000058128	286739	Both	9751.71	12952.8	11373	1.49156	0.000202736	3.69307	9610.79	12981.7	11304.4	1.49989	0.000166866	3.77763
msrb3	ENSDARG00000045658	415184	Both	504.833	477.687	381.819	1.57051	0.000121329	3.91603	482.998	480.388	362.358	1.68715	3.39352e-05	4.46935
mst1	ENSDARG00000103308	259260	Both	753.859	224.012	309.234	3.61837	1.11519e-06	5.95265	744.261	225.885	308.896	3.63166	9.97537e-07	6.00107
msx1a	ENSDARG00000116118	30527	Both	76.5486	205.6	247.586	1.60853	0.0117174	1.93117	76.1614	203.398	240.582	1.6187	0.0123141	1.9096
msx1b	ENSDARG00000008886	30511	Both	1186.99	1985.42	1635.66	2.06974	9.6858e-07	6.01386	1171.34	1995.14	1628.63	2.07854	8.66749e-07	6.06211
msx2b	ENSDARG00000101023	30531	Both	189.918	212.76	268.466	1.76827	7.89028e-05	4.10291	187.993	213.619	267.314	1.76595	9.95052e-05	4.00215
msx3	ENSDARG00000015674	30526	Both	944.746	1760.38	1217.05	2.08988	1.4623e-06	5.83496	932.254	1769.26	1211.82	2.09771	1.45087e-06	5.83837
mthfs	ENSDARG00000104487	100332843	Both	254.839	181.051	212.785	1.12455	0.0361063	1.44242	251.622	181.934	211.871	1.12762	0.0366733	1.43565
mtnr1ab	ENSDARG00000055852	565718	Ens95only	206.391	280.27	270.455	1.48166	0.00125701	2.90066	33.7424	32.7073	49.5025	-0.0269778	0.986778	0.00578071
mustn1a	ENSDARG00000054026	559807	Both	100.773	90.0138	88.4945	2.00274	0.00724121	2.14019	100.263	89.945	88.1145	2.03527	0.00757272	2.12075
mvp	ENSDARG00000021242	373081	Both	6134.55	11575	6598.31	1.7342	0.00102926	2.98748	6305.01	11813.5	6703.63	1.73648	0.000917542	3.03737
mxd4	ENSDARG00000054031	559531	RefSeqOnly	102.711	807.056	397.728	1.47692	0.074855	1.12578	509.992	1748.82	708.876	1.4339	0.0141023	1.85071
mxra5a	ENSDARG00000074815	100151112	Both	792.617	1573.2	1336.37	2.2703	2.37561e-07	6.62422	473.357	855.5	844.513	2.24096	1.26866e-05	4.89665
mxra5b	ENSDARG00000076309	795448	Both	381.774	170.822	461.365	1.65693	0.00300826	2.52168	421.298	181.934	510.866	1.70203	0.00216256	2.66503
mxra8a	ENSDARG00000062222	562784	Both	2056.15	4007.66	2055.26	2.60552	1.05584e-09	8.9764	2034.18	4033.22	2046.43	2.6137	9.61748e-10	9.01694
mxra8b	ENSDARG00000062129	556385	Both	2335.22	5018.27	3433.39	2.439	1.16085e-07	6.93522	2304.12	5044.07	3419.63	2.44947	1.0433e-07	6.98159
MYADM	ENSDARG00000086815	100005501	Ens95only	403.092	1014.7	733.808	1.80676	9.37997e-05	4.0278	0	11.2431	13.8607	-0.56856	0.81927	0.0865727
mybpc2a	ENSDARG00000030157	751793	RefSeqOnly	79.4555	109.449	45.7387	1.22045	0.0811328	1.0908	76.1614	110.387	42.5722	1.48666	0.0461028	1.33627
mycb	ENSDARG00000007241	393141	Both	11522	13369.1	9428.15	2.09767	0.000902096	3.04475	11373.1	13436.6	9383.7	2.10603	0.000814448	3.08914
mych	ENSDARG00000077473	560341	Both	3278.99	5819.19	6061.38	1.12557	0.02077	1.68256	3239.27	5845.4	6048.22	1.1316	0.0194799	1.71041
myd88	ENSDARG00000010169	403145	Both	1016.45	1964.96	1255.83	1.97752	0.00242932	2.61452	1003.59	1962.44	1246.47	1.99375	0.00257246	2.58965
myh10	ENSDARG00000000103	555454	Both	2322.62	4076.19	3217.62	1.49002	0.00031041	3.50806	2294.48	4091.48	3204.79	1.49809	0.00028315	3.54798
myh11a	ENSDARG00000009782	554168	Both	2046.46	2068.27	1996.6	3.99193	3.56354e-23	22.4481	2023.58	2093.27	1992.97	3.99844	4.33009e-23	22.3635
myh9b	ENSDARG00000001014	561431	Both	286.815	106.38	170.029	1.22434	0.047258	1.32552	274.759	111.409	163.358	1.50156	0.0116234	1.93467
myl4	ENSDARG00000011519	574004	Both	136.625	997.312	184.944	1.67646	0.030018	1.52262	85.8021	718.538	130.687	1.83192	0.0234935	1.62905
myl6	ENSDARG00000008494	798632	Both	1542.6	1372.71	1347.3	1.69142	1.33875e-06	5.8733	1512.62	1379.84	1341.52	1.6984	1.03393e-06	5.98551
myl9a	ENSDARG00000038123	450006	Both	3096.83	2245.23	2868.61	3.6738	8.59796e-14	13.0656	3184.32	2336.53	2953.32	3.71957	5.92601e-14	13.2272
myl9b	ENSDARG00000008030	406493	Both	2736.37	2516.3	1358.24	2.41672	6.68664e-06	5.17479	2641.55	2516.42	1348.45	2.42267	5.0877e-06	5.29348
mylk5	ENSDARG00000075164	100003770	Both	281.97	660.783	505.115	1.09687	0.0351498	1.45408	284.4	664.366	506.906	1.11892	0.0313147	1.50425
myo10	ENSDARG00000017004	569779	Both	413.75	728.294	589.632	1.31207	0.0060727	2.21662	1661.09	2612.49	1688.04	1.57867	0.000141756	3.84846
myo1b	ENSDARG00000024694	541515	Both	2714.08	6300.97	3694.89	2.10166	9.0467e-06	5.04351	2713.85	6355.43	3674.08	2.11528	7.03223e-06	5.15291
myo1ca	ENSDARG00000020924	567536	Both	531.965	769.209	639.348	1.10824	0.0416143	1.38076	528.309	777.82	636.602	1.11731	0.0398627	1.39943
MYO1D	ENSDARG00000036863	559562	Both	1386.6	1771.64	1202.13	1.78996	1.72538e-06	5.76311	1368.98	1780.5	1196.97	1.79769	1.51137e-06	5.82063
myo1ea	ENSDARG00000036179	555285	Both	615.296	838.765	566.763	1.5696	9.87317e-05	4.00554	606.399	825.859	563.339	1.5776	0.00010723	3.96968
myo5ab	ENSDARG00000025218	565267	RefSeqOnly	58.1382	55.2358	26.8466	0.423448	0.699073	0.155477	173.532	201.354	99.9951	1.31601	0.0168871	1.77244
myo9aa	ENSDARG00000076729	100006612	RefSeqOnly	237.398	204.577	180.966	0.377923	0.591857	0.227783	1618.67	1754.95	1374.19	1.21425	0.000907595	3.04211
myoc	ENSDARG00000021789	548602	Both	1090.09	2748.49	1525.29	2.66987	3.16364e-07	6.49981	1087.47	2763.76	1524.68	2.67798	2.72866e-07	6.56405
myorg	ENSDARG00000074894	100537539	Both	597.854	1272.47	951.565	1.29962	0.00325936	2.48687	528.309	1236.74	910.846	1.39537	0.00216051	2.66544
myoz2a	ENSDARG00000012311	393873	Both	80.4245	195.371	91.4775	2.19629	0.0011122	2.95382	80.0177	195.222	91.0846	2.29537	0.000914155	3.03898
nab1a	ENSDARG00000042940	565795	Both	464.137	431.657	337.075	1.07384	0.0363004	1.44009	458.896	434.393	339.587	1.07134	0.0336968	1.47241
nab2	ENSDARG00000078076	100005680	Both	200.577	209.691	169.034	2.14216	0.000471829	3.32622	1087.47	820.748	628.682	2.34372	9.57749e-06	5.01875
nap1l4a	ENSDARG00000070560	337155	Both	603.668	598.387	650.285	1.20097	0.007578	2.12045	588.082	596.908	645.513	1.22872	0.00705564	2.15146
napab	ENSDARG00000020405	327082	Both	978.66	1112.9	926.707	1.25528	0.00261669	2.58225	965.996	1110	922.727	1.26315	0.00226061	2.64578
napga	ENSDARG00000006617	541353	Both	794.555	795.804	736.791	2.10767	2.60226e-08	7.58465	980.457	1027.21	966.289	1.49856	1.76751e-05	4.75264
nbr1a	ENSDARG00000077297	337168	Both	909.863	2214.54	1518.33	1.28765	0.0115948	1.93574	899.476	2221.03	1507.85	1.30036	0.0103156	1.98651
nbr1b	ENSDARG00000078772	555713	Both	1639.5	1139.49	850.144	1.0095	0.0219842	1.65789	1611.92	1141.69	846.493	1.01666	0.0194842	1.71032
nccrp1	ENSDARG00000035326	30078	Both	852.694	672.035	647.303	1.03595	0.0452554	1.34433	841.631	675.61	644.523	1.04013	0.0433522	1.36299
nck1a	ENSDARG00000074262	564584	Both	855.601	1903.59	1112.64	1.78568	4.407e-05	4.35586	844.524	1913.38	1107.87	1.795	4.29546e-05	4.36699
nck1b	ENSDARG00000075369	100334953	Both	1638.53	1634.57	1144.46	1.30197	0.000979093	3.00918	1603.25	1648.65	1139.55	1.30887	0.000841826	3.07478
nck2b	ENSDARG00000043361	445098	Both	395.34	469.504	369.887	1.11962	0.00561888	2.25035	359.597	456.88	348.498	1.22527	0.0034652	2.46027
ncoa3	ENSDARG00000077404	564519	RefSeqOnly	1450.55	1743	1468.61	0.975908	0.00973189	2.0118	1393.08	1717.13	1428.64	1.04889	0.00514891	2.28828
ndel1b	ENSDARG00000104225	333957	Both	2709.24	2524.48	1761.94	1.9713	7.72785e-05	4.11194	2674.32	2537.88	1754.37	1.97769	6.72783e-05	4.17213
ndnfl	ENSDARG00000076462	100148595	Both	725.759	1627.41	1116.62	1.90351	0.000160689	3.79401	716.303	1638.43	1115.79	1.90762	0.00016041	3.79477
ndrg2	ENSDARG00000011170	494050	Both	4788.65	5977.74	4633.53	1.4072	4.26603e-05	4.36998	966.96	886.163	878.175	1.27054	0.00161494	2.79184
ndufa4l2a	ENSDARG00000103114	100003066	Both	1436.98	661.806	734.803	3.76373	2.49096e-12	11.6036	1465.38	672.543	737.588	3.76103	3.20877e-12	11.4937
nectin3b	ENSDARG00000006604	541491	Both	530.027	534.969	520.03	1.26512	0.00218247	2.66105	448.292	483.454	456.413	1.40244	0.00109593	2.96022
nedd4a	ENSDARG00000099843	619412	Ens95only	1233.5	624.982	764.632	1.36196	0.00326469	2.48616	22.1736	12.2652	10.8906	-0.1254	0.950878	0.0218752
nedd9	ENSDARG00000089878	768136	Both	859.476	1503.64	937.644	1.01661	0.0266559	1.57421	848.38	1511.69	933.618	1.02639	0.0250735	1.60078
nek8	ENSDARG00000045626	171094	Both	143.408	208.668	220.739	1.47647	0.00197254	2.70497	141.718	209.531	219.791	1.4811	0.0022438	2.64902
neo1b	ENSDARG00000075100	100332721	Both	1701.51	1515.91	1234.95	1.01707	0.00776378	2.10993	1679.41	1522.93	1233.6	1.02132	0.00673466	2.17168
neu3.2	ENSDARG00000010047	445250	Both	65.89	115.586	133.239	1.27428	0.0452554	1.34433	65.5566	116.52	132.667	1.35764	0.0352251	1.45315
neurl1b	ENSDARG00000099694	553620	Both	380.805	414.268	327.131	1.59285	0.000249442	3.60303	375.987	421.106	325.727	1.56384	0.000359436	3.44438
nfatc4	ENSDARG00000054162	561682	Both	369.178	738.523	479.262	1.46122	0.00215084	2.66739	354.777	724.671	472.254	1.49145	0.0022308	2.65154
nfe2l2a	ENSDARG00000042824	360149	Both	5984.36	4831.08	4827.43	1.17367	0.00176348	2.75363	5906.85	4860.1	4807.69	1.17859	0.00145007	2.83861
nfic	ENSDARG00000043210	100005568	RefSeqOnly	79.4555	52.1671	79.5456	0.380218	0.683269	0.165408	3077.31	3694.9	3121.63	1.01135	0.00837197	2.07717
nfil3	ENSDARG00000042977	445509	Both	2457.31	2315.81	881.962	1.41828	0.00385117	2.41441	2424.63	2326.3	878.175	1.423	0.00353027	2.45219
nfil3-5	ENSDARG00000094965	335737	Both	4877.79	5762.93	917.758	1.50275	0.0258244	1.58797	4816.48	5795.32	918.767	1.51053	0.0242187	1.61585
nfkb2	ENSDARG00000038687	415100	Both	874.98	1254.06	1115.63	1.20966	0.00877731	2.05664	846.452	1256.16	1103.91	1.21499	0.00859865	2.06557
nfkbiaa	ENSDARG00000005481	406463	Both	6371.95	2621.65	2563.36	1.78703	0.00351596	2.45396	6290.54	2636	2544.43	1.79011	0.00322021	2.49212
ngfb	ENSDARG00000014050	58133	Both	355.612	281.293	238.637	1.37377	0.00455004	2.34198	350.921	283.122	237.612	1.38387	0.00422408	2.37427
ngfra	ENSDARG00000088708	100535003	Ens95only	993.194	2233.98	1104.69	1.1485	0.0219842	1.65789	91.5865	61.3261	63.3632	0.658799	0.427222	0.369346
ngfrb	ENSDARG00000089223	564338	Ens95only	403.092	269.019	144.176	1.3361	0.0147867	1.83013	60.7363	79.724	38.612	0.710308	0.435129	0.361382
nhsl2	ENSDARG00000089066	794153	Both	1836.2	2480.49	1868.33	1.30702	0.000381309	3.41872	1820.16	2499.04	1868.23	1.31605	0.000339545	3.4691
nid1a	ENSDARG00000068710	562690	Both	3197.6	4881.2	5231.12	2.48593	2.30263e-09	8.63778	2394.75	4009.71	4079.01	2.63819	3.01871e-10	9.52018
nid2a	ENSDARG00000075707	322921	Both	6829.3	11007.3	8256.84	2.46806	2.42847e-09	8.61467	6740.76	11062.2	8216.43	2.47555	2.01938e-09	8.69478
nkd1	ENSDARG00000020053	751108	Both	1454.42	2016.11	1531.25	1.05878	0.00564199	2.24857	1443.21	2032.96	1535.57	1.07117	0.00481719	2.31721
nkx3.2	ENSDARG00000037639	337865	Both	305.226	324.254	378.836	1.03851	0.022662	1.6447	301.753	347.515	376.219	1.07544	0.0175577	1.75553
nmrk2	ENSDARG00000067848	447879	Both	934.087	1978.26	775.57	2.7871	6.48214e-07	6.18828	901.404	1835.7	748.478	2.80795	1.6153e-06	5.79175
nog1	ENSDARG00000058819	30174	Both	184.104	430.634	263.495	1.65798	0.00250576	2.60106	182.209	432.349	262.363	1.67123	0.00256504	2.59091
nog2	ENSDARG00000043066	30185	Both	504.833	512.465	503.126	1.52863	4.87443e-05	4.31208	493.603	515.14	500.966	1.52984	4.96524e-05	4.30406
nog3	ENSDARG00000053528	30173	Both	748.045	722.156	935.655	2.82476	3.22541e-13	12.4914	103.155	217.708	290.085	3.12247	7.17747e-07	6.14403
nop53	ENSDARG00000100452	322404	Both	6249.86	3698.75	4032.96	1.10026	0.0254778	1.59384	6169.07	3713.3	4015.64	1.10387	0.023192	1.63466
nos1apa	ENSDARG00000105071	553539	Ens95only	1567.79	1022.88	866.053	1.13727	0.0179566	1.74578	887.907	351.603	357.408	0.819276	0.243703	0.613139
notch2	ENSDARG00000043130	58065	Both	4108.43	8382.54	6214.5	1.77631	3.21785e-05	4.49243	4054.87	8426.21	6188.81	1.78551	2.88982e-05	4.53913
notch3	ENSDARG00000052139	58066	Both	8442.64	8549.27	7659.25	1.30294	7.53753e-05	4.12277	2503.68	928.069	1258.35	1.49996	0.00200635	2.69759
notum1b	ENSDARG00000117145	436917	Both	512.585	413.245	406.677	2.29921	1.87203e-07	6.72769	513.848	414.974	404.931	2.29663	1.82085e-07	6.73973
npc2	ENSDARG00000090912	282673	Both	1955.38	1563.99	1671.45	1.14045	0.00516683	2.28678	1929.1	1561.77	1658.33	1.14755	0.00443997	2.35262
nppc	ENSDARG00000068126	570244	Both	1204.43	685.333	429.546	2.09586	9.4034e-05	4.02671	1188.7	688.897	427.702	2.09988	8.71349e-05	4.05981
npr1a	ENSDARG00000031751	560653	Both	219.956	337.552	166.051	1.57893	0.00211405	2.67489	107.976	125.719	82.1742	1.56869	0.0112289	1.94966
npr2	ENSDARG00000104393	100331745	Both	263.56	847.971	452.416	2.13332	7.61544e-05	4.1183	906.224	2202.63	1061.33	2.16346	2.27393e-06	5.64322
npr3	ENSDARG00000035253	569395	Both	621.11	1190.64	1051.99	2.95123	3.25316e-11	10.4877	1089.4	1585.28	1314.79	2.86143	1.17554e-14	13.9298
nr1h5	ENSDARG00000031046	557500	Both	367.24	152.41	241.62	2.80729	1.86756e-06	5.72873	355.741	152.293	250.483	2.87362	1.59491e-06	5.79726
nr2f5	ENSDARG00000033172	30427	Both	554.251	595.319	350.001	1.14038	0.0121286	1.91619	547.591	597.93	348.498	1.1469	0.0114984	1.93936
nr2f6b	ENSDARG00000003165	406522	Both	411.812	735.454	565.768	1.24755	0.00522996	2.2815	389.484	738.98	559.379	1.28166	0.00461725	2.33562
nr4a3	ENSDARG00000055854	548604	Both	2961.17	3552.48	2753.27	1.3822	0.0493826	1.30643	2915.34	3565.09	2753.33	1.38156	0.0483274	1.31581
nr5a5	ENSDARG00000039116	407626	Both	180.228	41.9383	61.6479	2.2458	0.00423911	2.37273	178.353	42.9283	61.3831	2.25892	0.00477869	2.32069
nrbp2a	ENSDARG00000032951	564177	RefSeqOnly	86.2383	33.7552	34.8012	0.843431	0.358618	0.445368	1451.89	1720.2	1106.88	2.10318	5.78797e-08	7.23747
nrp1a	ENSDARG00000102153	353246	Both	1183.11	1503.64	914.775	1.42054	0.000324291	3.48906	5199.22	7180.27	5184.89	1.53422	1.03263e-05	4.98605
nrp2a	ENSDARG00000096546	405901	Both	2787.73	3651.7	2853.7	1.45917	5.21224e-05	4.28298	2740.85	3675.48	2849.37	1.45937	4.97294e-05	4.30339
nrp2b	ENSDARG00000038446	405902	Both	2204.41	4069.03	2937.22	1.24343	0.00317312	2.49851	2658.9	4949.02	3488.94	1.08053	0.00831812	2.07997
nsa2	ENSDARG00000007708	321769	Both	10649	6627.27	8099.73	1.30637	0.00361419	2.44199	10510.3	6662.06	8065.94	1.31009	0.00310747	2.50759
nt5c3a	ENSDARG00000058597	321720	Both	1417.6	2664.61	1330.4	1.32184	0.00246124	2.60885	1385.37	2654.4	1293.01	1.35438	0.00199532	2.69999
nt5e	ENSDARG00000071017	393906	Both	721.883	1101.65	888.922	2.11074	5.1376e-07	6.28924	712.446	1107.96	885.105	2.11834	5.0205e-07	6.29925
ntd5	ENSDARG00000040944	386628	Both	5637.47	12119.1	8956.84	2.65011	6.00133e-10	9.22175	5526.04	12148.7	8886.69	2.65975	5.40733e-10	9.26702
ntn1a	ENSDARG00000105112	30227	Both	3537.71	4908.82	2992.9	1.89552	4.79232e-07	6.31945	3471.61	4927.56	2974.11	1.90289	4.11773e-07	6.38534
ntn5	ENSDARG00000036422	796299	Both	140.501	284.362	212.785	1.13822	0.0312748	1.50481	98.3349	153.315	141.577	1.21722	0.0404926	1.39262
nuak1a	ENSDARG00000020086	561563	RefSeqOnly	35.8519	34.7781	34.8012	1.26215	0.199704	0.699614	803.069	1532.13	863.324	2.00372	4.55679e-06	5.34134
nuak1b	ENSDARG00000028676	561496	Both	4319.67	6922.88	3769.47	1.44287	0.000966627	3.01474	4260.22	6954.38	3753.28	1.45303	0.000855099	3.06798
nucb1	ENSDARG00000054833	751753	Both	586.227	840.811	587.643	1.01742	0.0162467	1.78923	632.429	907.627	602.941	1.03482	0.0139376	1.85581
nucb2a	ENSDARG00000036299	373078	Both	2122.04	3051.26	2739.35	1.49252	3.32412e-05	4.47832	1655.3	2676.89	2358.3	1.58587	2.2346e-05	4.6508
nucb2b	ENSDARG00000036291	326050	Both	177.322	359.032	403.694	1.41095	0.00457719	2.3394	166.784	360.802	400.97	1.40776	0.0060325	2.2195
nupr1b	ENSDARG00000094557	799637	Both	1940.85	1515.91	861.081	1.64472	0.000930808	3.03114	1913.68	1511.69	857.384	1.66562	0.000733019	3.13488
oaz2a	ENSDARG00000045929	100002007	Ens95only	4709.19	2845.66	2607.11	2.62624	2.7181e-09	8.56573	77.1254	19.4199	30.6916	1.23676	0.231818	0.634853
odc1	ENSDARG00000007377	114426	Both	2628.82	1004.47	946.593	1.52021	0.00334467	2.47565	2458.37	959.754	918.767	1.57673	0.00185066	2.73267
ogna	ENSDARG00000044132	541445	Both	6133.58	10470.2	9134.82	1.73482	0.00153644	2.81348	6054.35	10523.6	9095.59	1.74369	0.00138447	2.85872
olfml2a	ENSDARG00000005648	100002223	Both	163.756	905.253	522.018	2.22835	0.000518295	3.28542	161.963	910.693	519.777	2.23662	0.000531933	3.27414
olfml3a	ENSDARG00000061852	568106	Both	2905.94	3015.46	2338.64	2.64822	1.03488e-09	8.98511	2869.07	3031.56	2328.6	2.65496	7.31457e-10	9.13581
olfml3b	ENSDARG00000062171	562022	Both	3130.74	5978.76	4392.91	2.24035	4.0184e-07	6.39595	3068.63	5984.41	4363.15	2.24594	3.83597e-07	6.41612
omd	ENSDARG00000093600	557913	Both	105.618	165.707	305.256	1.52863	0.0339326	1.46938	105.083	167.625	303.945	1.49121	0.0352837	1.45243
omgb	ENSDARG00000089444	101882436	Ens95only	257.746	213.783	105.398	2.6228	7.22051e-06	5.14143	314.286	237.128	150.488	0.228672	0.790813	0.101926
opn7b	ENSDARG00000116584	100332167	RefSeqOnly	25.1932	13.2975	28.8353	1.55742	0.223662	0.650408	97.3709	39.862	60.3931	2.05213	0.0219627	1.65831
optn	ENSDARG00000002663	336159	Both	730.603	711.928	468.325	1.74752	4.98806e-05	4.30207	588.082	689.919	442.553	1.77317	5.24776e-05	4.28003
ormdl3	ENSDARG00000025555	450067	Both	92.0521	76.7163	117.33	1.31535	0.0285924	1.54375	91.5865	77.6798	116.826	1.33513	0.0297615	1.52635
osbpl3b	ENSDARG00000040482	567921	RefSeqOnly	405.998	563.609	418.609	0.984566	0.0210189	1.67739	386.591	566.245	412.851	1.02335	0.0176081	1.75429
oser1	ENSDARG00000024669	393328	Both	3400.12	779.438	2706.54	1.97784	0.0037786	2.42267	3355.92	781.908	2694.92	1.98283	0.00344454	2.46287
osr1	ENSDARG00000014091	450059	Both	1661.78	3523.84	2016.48	1.89194	0.000592146	3.22757	1639.88	3542.61	2007.82	1.89988	0.0005664	3.24688
otos	ENSDARG00000108475	100535618	Both	35658.1	21908.1	18124.5	4.34254	2.15939e-16	15.6657	35195.2	22021.2	18047.6	4.34627	1.28922e-16	15.8897
otud1	ENSDARG00000100872	100537398	RefSeqOnly	124.028	778.415	577.7	2.80024	0.100934	0.995964	2853.64	2648.27	2152.37	2.67302	1.46483e-06	5.83421
oxsr1b	ENSDARG00000027500	394150	Both	955.404	1241.78	981.394	1.8384	7.66669e-07	6.11539	1100.97	1399.26	1098.96	1.7017	2.5581e-06	5.59208
p3h1	ENSDARG00000071212	553321	Both	854.632	1243.83	989.349	1.59494	0.000249225	3.60341	857.057	1258.21	995.991	1.60397	0.000237323	3.62466
p3h2	ENSDARG00000103026	566697	Both	811.028	659.76	479.262	1.24241	0.00662086	2.17909	712.446	619.394	434.632	1.34444	0.00270968	2.56708
p3h3	ENSDARG00000057879	553311	Both	602.699	939.008	918.752	1.97352	4.37912e-05	4.35861	594.83	943.4	914.807	1.98087	4.10175e-05	4.38703
p3h4	ENSDARG00000104089	570779	Both	108.525	394.833	204.83	1.93671	0.00226094	2.64571	136.898	412.929	215.831	1.94978	0.00142167	2.8472
p4ha1b	ENSDARG00000071082	100003675	Both	447.664	1191.66	808.382	1.69865	0.0008907	3.05027	433.831	1197.9	794.02	1.80757	0.000550167	3.25951
p4ha2	ENSDARG00000010085	373132	Both	1356.56	1297.02	2078.13	1.56038	0.0108009	1.96654	1318.85	1392.1	2191.97	1.58979	0.00906987	2.0424
p4ha3	ENSDARG00000103692	563281	Both	94.9591	202.531	131.25	2.51416	2.20298e-05	4.65699	153.287	297.432	189.1	1.61476	0.00128	2.89279
p4hb	ENSDARG00000105116	406673	Both	479.64	796.827	625.427	1.52367	0.000256885	3.59026	473.357	801.328	622.742	1.53009	0.000255775	3.59214
pabpc1b	ENSDARG00000021140	393856	Both	4955.31	4054.71	5480.69	1.47741	0.000390503	3.40838	4890.72	4074.1	5456.17	1.48278	0.000334023	3.47622
pabpc4	ENSDARG00000059259	321035	Both	1247.06	850.017	726.848	1.39715	0.0056911	2.2448	1215.69	855.5	721.747	1.42054	0.00605945	2.21757
pag1	ENSDARG00000055875	100034498	Both	1101.72	2007.92	1023.16	1.54753	0.000465027	3.33252	1062.4	2004.34	990.05	1.60997	0.000334979	3.47498
pah	ENSDARG00000020143	378962	Both	4743.11	3519.75	5093.9	3.03147	6.30731e-13	12.2002	4681.51	3537.5	5072.03	3.03849	3.14124e-13	12.5029
palld	ENSDARG00000040009	557660	Both	750.952	713.973	424.575	1.08539	0.017448	1.75826	756.793	728.759	431.662	1.10047	0.0154719	1.81046
palm2	ENSDARG00000069608	100002543	RefSeqOnly	251.932	183.096	198.864	1.00382	0.125002	0.903081	3213.24	3286.06	2705.81	1.95624	3.27751e-07	6.48446
palm3	ENSDARG00000071215	790940	RefSeqOnly	168.601	129.906	123.296	0.984977	0.0628683	1.20157	213.059	181.934	140.587	1.1127	0.0286041	1.54357
PAMR1oneOfMany	ENSDARG00000103184	560295	Both	277.125	437.795	344.035	1.64718	0.000199318	3.70045	253.55	421.106	315.826	1.71164	0.000203511	3.69141
paplnb	ENSDARG00000042186	553586	Both	114.338	102.288	76.5627	1.73858	0.00736044	2.1331	124.365	110.387	83.1642	1.6594	0.012069	1.91833
pappa2	ENSDARG00000076020	567038	Both	836.221	679.195	635.371	1.66659	0.000134509	3.87125	825.242	682.764	625.712	1.66953	0.00012804	3.89265
pappab	ENSDARG00000059858	101448001	Both	286.815	373.353	241.62	1.97222	9.11096e-05	4.04044	739.44	536.604	390.08	2.27591	1.28669e-05	4.89052
papss2a	ENSDARG00000071021	777719	Both	620.141	549.289	555.825	2.05719	1.24457e-07	6.90498	612.183	545.803	553.438	2.06483	1.19894e-07	6.9212
papss2b	ENSDARG00000056600	80939	Both	1942.78	2865.1	2032.39	2.02792	4.22281e-08	7.3744	1917.53	2880.28	2023.66	2.03526	3.59973e-08	7.44373
pard3ab	ENSDARG00000010583	403050	Ens95only	407.936	376.421	363.921	1.09143	0.0182578	1.73855	246.801	217.708	224.741	0.886026	0.0802691	1.09545
pard6a	ENSDARG00000069378	792828	Ens95only	628.862	996.289	615.484	1.34355	0.00161079	2.79296	21.2095	11.2431	12.8707	0.518135	0.779281	0.108306
parp16	ENSDARG00000018593	405842	Both	595.917	878.658	709.945	1.17845	0.00335926	2.47376	588.082	883.096	706.896	1.18572	0.00322335	2.49169
parp4	ENSDARG00000069934	558045	Both	630.799	888.887	577.7	1.35214	0.00259444	2.58596	622.788	891.273	571.259	1.40863	0.0015026	2.82316
parvaa	ENSDARG00000043710	442922	Both	586.227	668.966	726.848	1.45852	0.000573595	3.24139	578.441	672.543	723.727	1.4648	0.000558402	3.25305
parvab	ENSDARG00000035629	567123	Both	210.266	337.552	396.734	3.22133	4.12278e-09	8.38481	208.239	339.338	395.03	3.25603	3.41999e-09	8.46598
pawr	ENSDARG00000045486	449994	Ens95only	783.897	610.662	574.717	2.46257	1.58706e-07	6.79941	63.6285	38.8399	25.7413	1.4752	0.138149	0.859651
pbx1b	ENSDARG00000101131	570960	RefSeqOnly	173.446	105.357	80.5399	1.25211	0.0512828	1.29003	205.347	124.696	91.0846	1.31005	0.032563	1.48728
pbx2	ENSDARG00000019717	58136	Both	549.406	1194.73	800.428	1.19054	0.0108969	1.9627	542.77	1200.97	796.991	1.20208	0.0102408	1.98967
pbxip1a	ENSDARG00000071015	563463	Both	476.733	543.152	383.808	1.04712	0.0140608	1.85199	474.322	545.803	382.159	1.03719	0.0149609	1.82504
pcbd1	ENSDARG00000031981	393787	Both	1447.64	1132.33	1332.39	1.62988	0.000998155	3.0008	1409.47	1124.31	1303.9	1.61549	0.00096498	3.01548
pcdh18a	ENSDARG00000089805	572532	Both	4532.84	3975.95	3887.79	2.91053	1.66071e-17	16.7797	4461.71	3996.42	3863.18	2.92706	5.81009e-18	17.2358
pcdh18b	ENSDARG00000052494	562031	Both	1041.64	3051.26	1697.3	1.16314	0.0312424	1.50526	1046.01	3075.51	1697.94	1.17627	0.0282805	1.54851
pck1	ENSDARG00000013522	378727	Both	286.815	142.181	266.478	1.49829	0.0255074	1.59333	283.436	143.094	264.343	1.53692	0.0248712	1.6043
pcmtd2	ENSDARG00000053820	556012	Both	169.57	218.897	125.284	1.45131	0.00914448	2.03884	167.748	219.752	124.746	1.46464	0.00968052	2.0141
pcmtl	ENSDARG00000042848	393741	RefSeqOnly	299.412	526.786	378.836	0.948508	0.0499366	1.30158	307.538	527.405	375.229	1.06613	0.0232877	1.63287
pcolce2a	ENSDARG00000008450	100002838	Both	327.512	394.833	339.063	1.70233	0.000264341	3.57783	258.37	321.962	266.324	2.32256	3.56446e-06	5.44801
pcolce2b	ENSDARG00000055575	393432	Both	2088.13	1595.7	1101.71	3.36273	4.77035e-12	11.3214	2061.18	1603.68	1096.98	3.37554	3.80045e-12	11.4202
pcolcea	ENSDARG00000056913	563867	Both	3591.97	5159.43	2400.29	2.6477	3.56106e-08	7.44842	3474.5	5127.89	2368.2	2.67235	2.59935e-08	7.58514
pcolceb	ENSDARG00000052057	794872	Both	3986.34	1874.95	2259.1	6.19081	2.54383e-25	24.5945	3948.82	1953.24	2285.04	6.2101	3.23088e-26	25.4907
pcsk5b	ENSDARG00000060518	559556	Both	220.925	277.202	253.552	1.85343	2.09673e-05	4.67846	224.628	305.609	268.304	1.63176	0.000254924	3.59359
pcsk9	ENSDARG00000074185	100150316	RefSeqOnly	39.7278	27.6179	10.9375	1.6529	0.146068	0.835445	44.3471	82.7903	44.5523	1.95209	0.00956387	2.01937
pcxa	ENSDARG00000098766	553283	Ens95only	986.411	2035.54	1943.9	1.15109	0.00995058	2.00215	175.46	220.774	242.562	0.840179	0.105105	0.978376
pdcd6	ENSDARG00000005220	393925	Both	728.665	1574.22	1285.66	2.07335	2.72447e-06	5.56472	719.195	1582.21	1280.14	2.08113	2.62341e-06	5.58113
pde10a	ENSDARG00000003449	394077	Both	621.11	283.339	239.631	1.39306	0.0148363	1.82867	631.465	286.189	242.562	1.38095	0.0172605	1.76295
pde1a	ENSDARG00000060875	564465	RefSeqOnly	13.5656	8.18308	11.9318	-0.0760647	0.971786	0.0124293	143.646	94.0334	119.796	1.12421	0.0469189	1.32865
pde3a	ENSDARG00000004227	567051	RefSeqOnly	197.67	75.6935	119.318	1.11692	0.11258	0.948538	1388.26	2286.44	1701.9	2.01923	2.13485e-06	5.67063
pdgfab	ENSDARG00000098578	767790	Both	855.601	776.369	757.672	1.92228	5.60907e-07	6.25111	844.524	780.886	754.418	1.93	4.79317e-07	6.31938
pdgfc	ENSDARG00000077588	560564	Both	156.973	359.032	299.29	1.64205	0.00107261	2.96956	156.179	360.802	299.985	1.56843	0.00218613	2.66032
pdgfra	ENSDARG00000070494	386856	Both	3271.24	10197.1	6171.75	2.28111	2.6923e-06	5.56988	724.979	1995.14	1354.39	2.16158	5.41597e-05	4.26632
pdgfrb	ENSDARG00000100897	559529	Both	14602.4	9513.85	10177.9	3.99981	3.15948e-23	22.5004	1347.77	1105.91	1088.07	3.47205	1.8239e-19	18.739
pdgfrl	ENSDARG00000006456	393284	Both	2785.79	4839.27	3153.98	2.12433	1.23062e-06	5.90987	2742.77	4851.92	3135.49	2.13075	1.12363e-06	5.94937
pdk2a	ENSDARG00000020876	794083	Both	2008.67	2979.66	1498.44	1.40847	0.000987006	3.00568	1982.12	2995.78	1492.01	1.41651	0.000910953	3.0405
pdk2b	ENSDARG00000059054	393971	Both	2685.98	1759.36	2909.38	2.14903	1.80079e-05	4.74454	2620.34	1751.88	2879.07	2.17325	1.0799e-05	4.96661
pdk4	ENSDARG00000054848	561007	Both	254.839	430.634	242.614	1.10874	0.023181	1.63487	251.622	432.349	241.572	1.1167	0.0234017	1.63075
pdlim1	ENSDARG00000019845	550568	Both	2579.4	3723.3	2387.36	1.52282	0.00110218	2.95775	2470.91	3692.86	2346.42	1.53397	0.000978607	3.00939
pdlim2	ENSDARG00000069956	560322	Both	444.757	792.735	781.536	2.33041	4.23161e-08	7.37349	439.615	796.218	778.18	2.35778	3.12165e-08	7.50562
pdlim3a	ENSDARG00000011023	554148	Both	70.7348	69.5561	40.7671	2.60313	0.000368711	3.43331	70.377	69.503	40.5921	2.59405	0.000568335	3.2454
pdlim7	ENSDARG00000103854	393813	RefSeqOnly	36.8209	65.4646	37.7842	1.03509	0.313329	0.503999	371.166	351.603	250.483	1.6417	0.000259557	3.58577
pdpk1b	ENSDARG00000018285	403000	Both	498.051	616.799	606.535	1.03659	0.00791597	2.1015	491.675	619.394	603.931	1.04829	0.00722986	2.14087
pdzrn3b	ENSDARG00000073869	100005518	Both	560.065	1112.9	759.661	1.31427	0.00241962	2.61625	497.459	1094.67	737.588	1.3472	0.00276523	2.55827
pear1	ENSDARG00000060753	571812	Both	1140.48	1558.88	1066.91	2.1154	9.76245e-08	7.01044	1096.15	1520.89	1038.56	2.14824	8.40641e-08	7.07539
pef1	ENSDARG00000023989	445249	Both	796.493	875.589	712.928	1.19835	0.00452812	2.34408	777.039	869.809	687.095	1.1999	0.00438196	2.35833
per2	ENSDARG00000034503	140633	Both	4355.52	1893.36	525.995	2.00059	0.00455098	2.34189	4303.6	1903.15	523.737	2.00179	0.00429089	2.36745
pfkfb3	ENSDARG00000001953	554477	Both	1488.34	1293.95	842.189	2.01838	0.000345341	3.46175	1450.92	1300.11	825.702	2.06216	0.000224747	3.64831
pfn2	ENSDARG00000003952	394235	Both	13126.6	12053.7	11846.3	1.0395	0.00931919	2.03062	12956.1	12114	11790.5	1.04718	0.00807934	2.09262
pgfb	ENSDARG00000076767	557468	Both	206.391	69.5561	162.074	3.46722	4.81221e-07	6.31766	533.13	319.918	694.025	3.41615	3.15626e-12	11.5008
pgghg	ENSDARG00000014311	777617	Both	467.044	574.861	274.432	1.99233	1.08283e-05	4.96544	414.549	563.178	269.294	2.02777	8.56036e-06	5.06751
pgrmc1	ENSDARG00000054172	492520	Both	1912.75	2417.08	1975.71	1.22688	0.000751451	3.1241	1696.76	2255.78	1855.35	1.28452	0.00050391	3.29765
phactr2	ENSDARG00000027172	570136	RefSeqOnly	211.235	224.012	155.114	1.00224	0.115366	0.937921	398.16	488.565	325.727	1.34336	0.00402267	2.39549
phactr4b	ENSDARG00000032221	393643	Both	1190.86	1029.02	1147.45	1.45318	0.000318999	3.49621	1712.18	1974.7	2061.29	1.41383	0.000158896	3.79889
phex	ENSDARG00000062363	386969	Both	1662.75	1250.99	2003.56	1.96395	3.44345e-05	4.46301	1638.92	1257.19	1989.01	1.96855	2.89653e-05	4.53812
phkg2	ENSDARG00000054208	393937	Both	337.202	629.074	461.365	1.14611	0.0129923	1.88631	306.574	700.14	462.354	1.15883	0.0192522	1.71552
phlda3	ENSDARG00000037804	368779	Both	687	1165.07	743.752	1.94676	6.13841e-05	4.21194	678.704	1162.13	721.747	1.96114	5.99654e-05	4.2221
phldb2a	ENSDARG00000079889	570807	Both	260.653	276.179	247.586	1.45274	0.00522996	2.2815	391.412	664.366	445.523	1.51046	0.0037119	2.4304
phldb2b	ENSDARG00000074843	560668	Both	1151.14	2746.44	1506.4	1.45735	0.00208615	2.68065	1114.46	2740.26	1482.11	1.4875	0.00186432	2.72948
phykpl	ENSDARG00000040566	557205	Both	193.794	534.969	347.018	1.42406	0.00615297	2.21092	174.496	524.338	339.587	1.56113	0.00348638	2.45763
pi15b	ENSDARG00000061292	556658	Ens95only	420.533	220.943	484.234	2.12339	0.000143686	3.84259	20.2454	32.7073	71.2836	1.88947	0.0645561	1.19006
pibf1	ENSDARG00000015506	100006043	Ens95only	943.777	1026.98	852.133	1.02923	0.0318059	1.49749	228.484	75.6356	147.518	1.05565	0.187945	0.725969
pigr	ENSDARG00000101890	566471	Both	1255.79	1611.04	1294.61	2.91204	5.15564e-11	10.2877	1297.64	1681.36	1323.7	2.87281	7.22953e-11	10.1409
pik3c2a	ENSDARG00000060841	571356	Both	963.156	1388.05	1106.68	1.36196	0.000787435	3.10379	938.038	1386.99	1060.34	1.47649	0.000304263	3.51675
pik3cb	ENSDARG00000075253	100002263	Both	381.774	815.239	503.126	1.07576	0.0430257	1.36627	376.951	813.593	497.005	1.08665	0.0416445	1.38044
pik3r2	ENSDARG00000018060	404211	Both	3096.83	4274.63	3364.78	1.21289	0.0013207	2.8792	1917.53	2032.96	1650.41	1.17875	0.00206184	2.68575
pim1	ENSDARG00000100020	572469	Both	11132.5	8067.49	6452.14	1.43089	0.00554168	2.25636	10988.4	8106.29	6421.47	1.43728	0.00481719	2.31721
pim2	ENSDARG00000059001	58054	Both	1810.04	3180.15	2074.15	1.82917	0.00867568	2.0617	1785.45	3195.09	2061.29	1.84129	0.00798466	2.09774
pim3	ENSDARG00000055129	565041	Both	936.025	2115.33	1178.27	1.10137	0.025892	1.58683	923.577	2125.97	1177.17	1.11139	0.0243246	1.61395
pitx2	ENSDARG00000036194	30164	Both	1434.08	1324.64	683.098	1.79058	0.00135715	2.86737	1618.67	1651.72	853.424	1.81727	0.0010269	2.98847
pitx3	ENSDARG00000070069	402974	Both	547.468	576.907	504.12	1.88628	2.60985e-05	4.58338	480.106	553.979	470.274	1.86275	4.49205e-05	4.34756
pja2	ENSDARG00000100296	565118	Both	592.041	502.236	439.49	1.05649	0.00857906	2.06656	590.01	516.162	437.602	1.0766	0.00702579	2.1533
pkd1a	ENSDARG00000030417	100149562	RefSeqOnly	249.025	188.211	307.245	0.489726	0.4662	0.331428	3392.56	2735.15	3027.57	1.4722	0.000733115	3.13483
pkdccb	ENSDARG00000038235	565254	Both	297.474	409.154	342.046	1.69922	0.000128575	3.89084	85.8021	244.282	179.199	1.80106	0.00444454	2.35217
pknox2	ENSDARG00000055349	386959	Both	613.358	747.729	529.973	1.02316	0.0167793	1.77523	598.686	727.737	523.737	1.07214	0.010723	1.96968
pkp3b	ENSDARG00000079438	100330353	Both	528.089	901.161	480.257	1.35386	0.00702212	2.15353	499.387	871.853	458.393	1.44791	0.00422879	2.37378
pla2g15	ENSDARG00000103271	335008	Both	2013.52	2136.81	1499.44	1.49787	0.000102157	3.99073	1986.94	2147.44	1493	1.50398	8.82157e-05	4.05445
pla2g7	ENSDARG00000003584	406470	Both	327.512	531.9	397.728	1.02599	0.0233522	1.63167	313.322	513.095	388.1	1.06732	0.0185906	1.73071
plag1	ENSDARG00000051926	561450	Ens95only	559.096	580.998	396.734	1.1848	0.00723278	2.14069	83.8739	94.0334	52.4727	0.544285	0.567046	0.246382
plat	ENSDARG00000062707	100320028	RefSeqOnly	23.2553	26.595	14.9148	1.21158	0.334281	0.475888	62.6644	93.0113	89.1045	2.10894	0.00135716	2.86737
plaub	ENSDARG00000039145	100538108	Both	136.625	192.302	108.381	1.42596	0.0103693	1.98425	44.3471	142.072	54.4528	2.1086	0.00557629	2.25365
plce1	ENSDARG00000087921	568288	Both	447.664	395.856	366.904	1.15606	0.00865271	2.06285	962.14	1232.66	934.608	1.56805	4.52538e-05	4.34434
pld1a	ENSDARG00000056228	556641	Both	319.76	444.955	420.597	1.247	0.00507779	2.29433	316.214	446.659	418.791	1.25248	0.00506424	2.29549
pld2	ENSDARG00000034262	565743	RefSeqOnly	111.432	127.861	96.4491	0.690172	0.26444	0.577673	499.387	840.168	732.637	1.44826	0.000384138	3.41551
plek2	ENSDARG00000012789	567753	Both	185.073	185.142	108.381	2.09963	0.000260048	3.58495	183.173	187.045	107.916	2.10548	0.000322377	3.49164
plekhg2	ENSDARG00000058459	565988	Both	1256.75	2251.37	1212.08	2.1602	6.76466e-07	6.16975	1240.76	2254.76	1204.89	2.17844	5.44845e-07	6.26373
plekhg5a	ENSDARG00000025902	562861	Both	350.767	480.756	329.12	1.20036	0.0081835	2.08706	332.603	458.924	315.826	1.22957	0.0066779	2.17536
PLEKHH3	ENSDARG00000070174	571341	Both	3692.74	2734.17	2321.74	2.13889	1.58563e-07	6.7998	3630.68	2733.1	2307.81	2.14028	1.19626e-07	6.92218
plekhn1	ENSDARG00000087844	569267	Both	356.581	356.987	276.421	1.95605	3.14663e-05	4.50215	784.751	607.129	422.752	2.14	2.71721e-06	5.56588
plk2a	ENSDARG00000090752	100148413	Both	358.519	520.648	341.052	2.29991	4.76016e-08	7.32238	2061.18	1193.82	1076.18	2.16106	1.01263e-06	5.99455
plk3	ENSDARG00000038754	334202	Both	892.421	1377.83	891.905	1.12181	0.0110408	1.957	881.158	1377.79	886.095	1.13229	0.0101048	1.99547
plod1a	ENSDARG00000059746	777635	Both	1955.38	3978	2628.98	2.24899	2.1564e-07	6.66627	1930.06	3996.42	2617.69	2.26588	1.82092e-07	6.73971
plod2	ENSDARG00000011821	100036767	Both	423.44	405.062	371.876	1.80982	3.62812e-06	5.44032	289.22	325.029	275.234	1.88437	2.87454e-05	4.54143
plod3	ENSDARG00000076317	556077	Both	2441.8	3156.62	2641.91	2.09147	6.812e-09	8.16673	2410.17	3170.56	2630.56	2.10514	4.83127e-09	8.31594
plp2	ENSDARG00000036630	798079	Ens95only	271.312	188.211	179.972	1.04061	0.0359892	1.44383	268.975	195.222	189.1	0.927354	0.0610751	1.21414
plpbp	ENSDARG00000060288	563548	Both	613.358	528.831	422.586	2.14495	2.53857e-07	6.59541	694.129	691.963	597.99	2.19782	8.75273e-09	8.05786
plpp1a	ENSDARG00000053381	569053	Both	1419.54	1889.27	1570.03	1.24184	0.00467046	2.33064	1388.26	1856.14	1537.55	1.26296	0.00445847	2.35081
plpp2a	ENSDARG00000002231	563806	Both	50.3864	76.7163	52.699	1.99416	0.00386922	2.41238	114.724	196.244	118.806	2.53668	1.00394e-05	4.99829
plpp2b	ENSDARG00000028896	335485	Both	350.767	782.507	524.007	1.11587	0.0288495	1.53986	346.1	787.019	521.757	1.12795	0.0278025	1.55592
plpp3	ENSDARG00000059933	557680	Both	7335.1	15296.2	8318.48	2.01669	3.13043e-06	5.5044	7233.4	15374.5	8266.92	2.03401	2.69624e-06	5.56924
pls3	ENSDARG00000037655	436598	Both	1060.05	4102.79	2336.65	1.45522	0.00718678	2.14347	349.957	2438.74	1507.85	1.6452	0.0133206	1.87547
plscr3b	ENSDARG00000069432	405802	Both	2045.5	4744.14	3175.86	1.48594	0.000690864	3.16061	2018.76	4747.67	3150.34	1.50312	0.000595735	3.22495
plxdc2	ENSDARG00000059950	100000303	Both	1531.94	1309.29	1328.41	1.76661	5.79242e-06	5.23714	1501.05	1316.47	1319.74	1.79768	3.22069e-06	5.49205
plxnb2a	ENSDARG00000003811	561433	Ens95only	1656.94	1707.19	1594.89	1.45374	6.7479e-05	4.17083	134.97	111.409	152.468	0.723792	0.257596	0.58906
pmaip1	ENSDARG00000089307	751765	Both	553.282	600.433	396.734	1.82649	0.00148649	2.82784	546.627	604.062	395.03	1.8327	0.00141223	2.8501
pmp22a	ENSDARG00000105223	334817	Both	16070.4	22773.5	14342.1	1.76425	1.48906e-05	4.82709	15855.1	22879.8	14277.5	1.7714	1.29602e-05	4.88739
pmp22b	ENSDARG00000060457	678607	Both	4173.35	9641.71	5586.09	2.01585	1.1329e-05	4.94581	4119.46	9694.64	5562.1	2.02566	1.03593e-05	4.98467
pno1	ENSDARG00000008502	393520	Both	3487.32	1831.99	2011.51	1.20077	0.0122226	1.91284	3436.9	1841.83	2001.88	1.20548	0.010853	1.96445
pnp5a	ENSDARG00000078619	791647	Both	5102.6	3918.67	3582.54	1.56952	0.00895983	2.0477	5036.29	3939.18	3568.14	1.5754	0.0081751	2.08751
pnpla3	ENSDARG00000102020	436610	Both	166.663	201.508	213.779	1.3895	0.00305691	2.51472	164.856	202.376	212.861	1.3994	0.00325782	2.48707
pnpla7b	ENSDARG00000040002	503936	Both	711.224	941.054	626.422	1.05405	0.00932419	2.03039	700.878	932.157	607.891	1.08585	0.00752488	2.1235
pnrc2	ENSDARG00000053291	565522	Both	40462.2	51947.2	41610.3	1.5728	2.26881e-05	4.6442	39944.2	52214.1	41434.6	1.5802	1.80887e-05	4.74259
polr2b	ENSDARG00000098783	100149268	Ens95only	7770.17	3290.62	4504.27	1.7657	0.000184065	3.73503	614.111	865.721	700.956	-0.209601	0.734024	0.13429
pomt1	ENSDARG00000067670	569769	Both	163.756	133.998	318.183	1.34597	0.0244309	1.61206	162.928	134.917	314.836	1.34591	0.025264	1.5975
pon2	ENSDARG00000016856	335176	Both	734.479	1147.68	739.774	1.35043	0.001395	2.85543	717.267	1146.8	725.707	1.35017	0.00154916	2.8099
pon3.2	ENSDARG00000040290	554122	Both	1154.04	1706.17	1029.12	1.70968	3.85888e-05	4.41354	667.135	1031.3	673.234	1.80997	2.47865e-05	4.60578
ponzr1	ENSDARG00000090444	567858	Both	605.606	617.822	813.354	1.33073	0.0320281	1.49447	569.764	605.085	786.1	1.35289	0.0294444	1.531
pora	ENSDARG00000055092	568202	Both	1514.5	3499.29	1770.88	1.16612	0.0130944	1.88291	1567.57	3645.84	1826.64	1.114	0.0187053	1.72804
postnb	ENSDARG00000104267	337176	Both	4257.65	13640.2	6827	1.25358	0.0220878	1.65585	4202.37	13759.5	6817.49	1.26569	0.0210196	1.67738
pparda	ENSDARG00000044525	30750	RefSeqOnly	22.2863	4.09154	15.9091	0.556496	0.779513	0.108176	1439.35	1192.79	1138.56	2.50374	2.37545e-09	8.62425
ppdpfb	ENSDARG00000031317	336303	Both	13111.1	14078	7749.73	1.29035	0.00132299	2.87844	12862.6	14072.3	7664.97	1.30127	0.00109426	2.96088
ppfia1	ENSDARG00000098674	100003520	RefSeqOnly	19.3794	4.09154	2.98296	0.882231	0.695596	0.157643	1457.67	1039.48	937.578	1.00221	0.0165175	1.78206
ppfibp1a	ENSDARG00000045749	565020	Both	728.665	1707.19	1202.13	1.68156	0.000357895	3.44624	712.446	1708.95	1183.11	1.7643	0.000182489	3.73876
ppfibp1b	ENSDARG00000100057	561961	Both	686.031	1065.85	659.234	1.35148	0.00100754	2.99674	686.416	1077.3	656.403	1.34371	0.00113355	2.94556
ppfibp2a	ENSDARG00000061977	100317962	Both	425.378	875.589	595.598	1.1114	0.0338107	1.47095	398.16	884.118	585.12	1.14494	0.030711	1.51271
ppfibp2b	ENSDARG00000029168	100003048	Both	426.347	460.298	662.217	1.68062	3.27361e-05	4.48497	274.759	235.084	450.473	2.79431	4.3427e-07	6.36224
ppiaa	ENSDARG00000009212	336612	Both	51776.9	37338.4	39574.9	1.06258	0.0171477	1.7658	50413	36756.8	38767.4	1.06746	0.015657	1.80529
ppib	ENSDARG00000092798	406292	Both	10275.9	8735.43	8960.81	1.20817	0.00297981	2.52581	10142	8779.86	8923.33	1.21364	0.00250878	2.60054
ppp1r13bb	ENSDARG00000009142	557278	Both	994.163	2022.24	1319.46	1.20466	0.00751747	2.12393	970.817	2006.39	1293.01	1.25226	0.00534261	2.27225
ppp1r13l	ENSDARG00000013777	541507	Both	531.965	978.9	680.115	1.57735	0.000423075	3.37358	511.92	951.577	671.254	1.6261	0.000292234	3.53427
ppp1r15a	ENSDARG00000069135	797943	Both	6120.01	8244.45	7030.84	2.08317	0.00239133	2.62136	17102.6	13759.5	11059.9	2.24949	0.000486092	3.31328
ppp1r3da	ENSDARG00000077513	799144	Both	185.073	122.746	182.955	1.67853	0.000783904	3.10574	183.173	123.674	180.189	1.68977	0.000823027	3.08459
ppt1	ENSDARG00000039980	406648	RefSeqOnly	2820.67	2850.78	2589.21	0.367203	0.548503	0.260821	1010.34	1537.24	1168.26	1.04611	0.0102077	1.99107
pptc7a	ENSDARG00000011122	492506	Ens95only	2245.1	2271.83	1751.99	1.45254	0.000620706	3.20711	106.047	26.5747	79.204	0.476516	0.67974	0.167657
pqlc3	ENSDARG00000054251	447876	Both	166.663	384.605	264.489	1.2038	0.0254729	1.59392	165.82	386.355	264.343	1.2009	0.0274698	1.56114
prdm5	ENSDARG00000006288	432371	RefSeqOnly	81.3935	37.8467	40.7671	1.55807	0.0704198	1.15231	80.0177	38.8399	40.5921	1.82486	0.0303861	1.51732
prdx1	ENSDARG00000058734	541344	Both	2120.11	1820.73	2084.1	1.25574	0.00862259	2.06436	2070.82	1819.34	2049.4	1.27987	0.00748317	2.12591
prelid3b	ENSDARG00000009505	378855	Both	7660.68	5937.84	6963.23	1.50253	0.00769462	2.11381	7561.19	5968.06	6934.31	1.50837	0.00692647	2.15949
prelp	ENSDARG00000070597	100144408	Both	686.031	1524.1	1132.53	2.17324	1.60309e-05	4.79504	469.501	983.262	687.095	2.04443	0.00016999	3.76958
prex2	ENSDARG00000071692	557288	Both	1202.49	1524.1	1084.8	2.20938	2.62022e-09	8.58166	1186.77	1536.22	1086.09	2.20248	3.20085e-09	8.49474
prf1.5	ENSDARG00000037598	559384	Both	141.47	228.103	228.694	2.7086	1.61304e-06	5.79235	173.532	247.349	259.393	2.71594	3.12262e-07	6.50548
prickle1a	ENSDARG00000040649	368249	Both	262.591	469.504	355.967	1.76965	0.00019365	3.71298	143.646	140.028	124.746	1.43423	0.0114587	1.94086
prickle1b	ENSDARG00000045694	556148	Both	926.335	1516.94	1046.02	1.69258	1.4149e-05	4.84927	914.901	1528.04	1042.52	1.6957	1.44492e-05	4.84016
prickle2b	ENSDARG00000037593	368250	RefSeqOnly	512.585	772.278	604.547	0.983542	0.0212229	1.6732	474.322	743.068	586.11	1.07374	0.012485	1.90361
prkag1	ENSDARG00000003818	406440	Both	1468.96	1263.26	1275.71	1.22327	0.00127597	2.89416	1449.96	1270.47	1270.23	1.22843	0.00109738	2.95964
prkar1aa	ENSDARG00000076128	494533	Both	5338.06	8133.98	5771.04	2.2991	1.51872e-09	8.81852	5269.6	8175.8	5746.25	2.30504	1.19008e-09	8.92443
prkd2	ENSDARG00000104676	101882608	Both	1486.4	2269.78	1277.7	1.39574	0.000624424	3.20452	1518.41	2325.28	1332.61	1.37618	0.000657575	3.18205
prkd3	ENSDARG00000079967	557337	Both	829.438	1054.59	599.575	1.51408	0.000618414	3.20872	324.891	317.874	266.324	1.36616	0.00337271	2.47202
prkg1b	ENSDARG00000031702	566430	Both	295.536	209.691	222.728	1.59453	0.000904764	3.04346	299.825	205.443	221.771	1.58319	0.00120565	2.91878
prodha	ENSDARG00000086746	100333321	Both	414.719	205.6	590.626	1.53335	0.0208685	1.68051	1263.89	845.279	1730.61	1.67608	0.00444454	2.35217
pros1	ENSDARG00000068261	768180	Both	2304.21	1836.08	1449.72	2.97187	6.8325e-11	10.1654	2264.6	1843.87	1443.49	2.97991	6.74602e-11	10.171
proza	ENSDARG00000037783	768176	Both	4618.11	3848.09	3441.34	1.32605	0.000276622	3.55811	4558.11	3858.44	3416.66	1.3299	0.000226026	3.64584
prrx1a	ENSDARG00000033971	406431	Both	1965.07	3115.71	2260.09	1.80565	4.54077e-06	5.34287	1928.14	3114.35	2235.53	1.81348	4.38666e-06	5.35787
prrx1b	ENSDARG00000042027	337089	Both	727.696	1761.41	1049.01	1.17713	0.0125549	1.90119	718.231	1776.41	1047.47	1.18222	0.0125777	1.9004
prss12	ENSDARG00000061830	566809	Ens95only	173.446	896.047	523.012	1.38815	0.0281385	1.5507	36.6346	65.4145	49.5025	0.523716	0.617981	0.209025
prss35	ENSDARG00000100691	431759	Both	1940.85	4555.93	3227.56	2.58611	3.47817e-09	8.45865	1915.6	4580.04	3213.7	2.59956	3.01517e-09	8.52069
prx	ENSDARG00000017246	571950	Both	343.015	263.904	217.756	1.06921	0.0434256	1.36225	443.471	343.426	264.343	1.15507	0.0197168	1.70516
pskh1	ENSDARG00000056713	554840	Ens95only	642.427	1054.59	592.615	1.41927	0.00123093	2.90977	82.9099	199.31	118.806	1.40032	0.0585834	1.23223
ptbp1b	ENSDARG00000031907	321220	Both	1592.02	4913.94	2970.03	1.57721	0.00122476	2.91195	1594.57	4965.37	2965.2	1.58275	0.00113844	2.94369
ptenb	ENSDARG00000056623	368415	RefSeqOnly	2725.71	3017.51	2415.2	0.967142	0.00800393	2.0967	663.279	1134.53	713.826	1.02649	0.0273391	1.56322
ptgdsa	ENSDARG00000069439	555483	Both	468.013	176.959	348.012	4.07904	9.12348e-12	11.0398	363.454	123.674	258.403	4.16689	7.45739e-11	10.1274
ptger2a	ENSDARG00000011434	393608	Ens95only	64.921	102.288	99.432	1.44907	0.0240762	1.61841	36.6346	51.1051	53.4627	1.17761	0.157325	0.803202
ptger2b	ENSDARG00000037033	570410	Ens95only	385.65	181.051	222.728	2.33321	1.12684e-05	4.94814	31.8142	19.4199	15.8408	1.04261	0.509539	0.292823
ptges	ENSDARG00000020136	544666	Both	222.863	190.257	157.103	1.81565	0.0013441	2.87157	220.772	191.133	156.428	1.8239	0.00142484	2.84623
ptgs1	ENSDARG00000052148	246226	Both	243.211	437.795	433.524	1.22017	0.0220109	1.65736	234.269	439.504	431.662	1.23108	0.0220871	1.65586
ptgs2a	ENSDARG00000004539	246227	Both	3645.27	2911.13	1653.55	1.46264	0.0153786	1.81308	3590.19	2923.21	1640.51	1.46658	0.014561	1.83681
pth1rb	ENSDARG00000018418	30651	Both	19.3794	79.785	70.5967	2.08289	0.0437508	1.35901	19.2814	79.724	70.2936	2.10757	0.0457759	1.33936
pthlha	ENSDARG00000031737	554221	Both	89.1452	49.0985	45.7387	1.51683	0.0454456	1.34251	103.155	68.4809	53.4627	1.70501	0.023173	1.63502
ptp4a2b	ENSDARG00000035676	334483	Both	3976.65	3432.8	2707.53	1.38173	0.000500252	3.30081	3598.87	3199.18	2386.02	1.41308	0.000293226	3.5328
ptp4a3	ENSDARG00000039997	406460	Both	2007.71	1682.64	1387.08	1.40482	0.000133962	3.87302	1970.56	1666.03	1361.32	1.43734	8.72128e-05	4.05942
ptpn11a	ENSDARG00000020334	333979	Ens95only	1499.97	1928.14	1466.62	1.01331	0.0105161	1.97815	885.979	827.903	656.403	0.978732	0.0397237	1.40095
ptpn23b	ENSDARG00000098689	560417	Both	303.288	493.03	294.319	1.53434	0.000841846	3.07477	640.141	823.814	584.13	1.44426	0.000424615	3.372
pttg1ipb	ENSDARG00000040039	449768	Both	1321.68	1230.53	1019.18	1.30995	0.00124845	2.90363	1309.2	1215.28	1026.68	1.32616	0.000944481	3.02481
ptx3a	ENSDARG00000068275	101887125	Both	227.708	1004.47	484.234	2.14076	0.00127597	2.89416	1114.46	3687.74	1543.49	2.33455	3.63209e-05	4.43984
pxdc1b	ENSDARG00000040309	566349	Ens95only	171.508	244.469	151.137	1.33045	0.0108722	1.96368	68.4488	113.453	81.1841	0.964744	0.202007	0.694634
pxk	ENSDARG00000063195	557065	Both	1249.97	1641.73	1123.58	1.23565	0.00262281	2.58123	1241.72	1651.72	1123.71	1.2315	0.00265334	2.57621
pygb	ENSDARG00000002021	403051	Both	136.625	786.598	506.109	1.64474	0.0117583	1.92966	566.872	1625.14	1151.43	1.52704	0.00393241	2.40534
qdpra	ENSDARG00000040190	566323	Both	3236.36	2634.95	3021.74	2.19429	1.75796e-06	5.75499	466.609	245.305	293.055	2.19269	9.26495e-05	4.03316
qsox1	ENSDARG00000039459	100004382	Both	148.252	416.314	280.398	2.12796	0.00015644	3.80565	146.538	418.04	279.194	2.14318	0.000171214	3.76646
quo	ENSDARG00000073684	321031	Both	1726.7	2639.04	1505.4	2.08321	1.97856e-07	6.70365	1685.19	2559.34	1427.65	2.13442	1.0433e-07	6.98159
rab13	ENSDARG00000034771	373105	Both	511.616	1075.05	612.501	1.39445	0.00371102	2.43051	505.172	1080.36	609.871	1.42332	0.00314832	2.50192
rab18b	ENSDARG00000098344	445055	Both	563.941	563.609	825.286	1.06997	0.0489147	1.31056	557.231	563.178	817.782	1.07504	0.048941	1.31033
rab20	ENSDARG00000005049	337199	Both	305.226	369.261	270.455	1.14711	0.0116837	1.93242	301.753	371.023	270.284	1.14989	0.0119773	1.92164
rab22a	ENSDARG00000015807	100001531	Both	1026.14	1127.22	700.002	1.20916	0.00628455	2.20173	140.754	287.211	199.99	1.40323	0.0106756	1.97161
rab34a	ENSDARG00000045628	450074	Both	835.252	1244.85	949.576	1.58819	5.06483e-05	4.29544	825.242	1238.79	941.538	1.60174	4.28677e-05	4.36787
rab3il1	ENSDARG00000007711	100331248	RefSeqOnly	464.137	556.449	390.768	0.996005	0.0519459	1.28445	458.896	559.09	373.249	1.09253	0.0324503	1.48878
rab40b	ENSDARG00000042410	436797	RefSeqOnly	552.313	704.767	485.228	0.995295	0.0238858	1.62186	545.663	709.339	483.145	1.00357	0.022895	1.64026
rab8b	ENSDARG00000068628	100093706	Ens95only	638.551	786.598	753.695	1.0969	0.00636203	2.1964	12.5329	11.2431	77.2239	0.910187	0.52296	0.281531
rac1a	ENSDARG00000074849	327204	Both	1675.35	2376.16	1774.86	1.10588	0.0036437	2.43846	1653.38	2387.63	1759.32	1.11256	0.00338945	2.46987
rack1	ENSDARG00000041619	30722	Both	78706.5	64295.4	74079.8	1.08045	0.0217255	1.66303	77432	64040.8	73049.9	1.08435	0.0202223	1.69417
raf1a	ENSDARG00000096415	30716	Both	234.491	374.376	285.37	1.40744	0.00514132	2.28893	231.376	376.134	284.144	1.41996	0.00546369	2.26251
ralab	ENSDARG00000016253	492355	Both	759.672	1234.62	767.615	1.05637	0.0118818	1.92512	742.332	1219.37	753.428	1.06932	0.0107968	1.9667
RALGDS	ENSDARG00000042409	799483	RefSeqOnly	124.028	132.975	110.37	0.810736	0.250505	0.601183	2015.87	3969.85	2237.51	1.52083	0.00206142	2.68583
ramp2	ENSDARG00000037895	566313	Both	1717.01	4609.12	2756.26	3.20752	2.23728e-12	11.6503	1694.83	4633.19	2744.42	3.21421	2.35851e-12	11.6274
rap1b	ENSDARG00000008867	321107	Both	3495.07	3591.35	2745.32	1.04302	0.0151609	1.81928	2919.2	3294.24	2399.88	1.05989	0.012269	1.91119
rapgef3	ENSDARG00000079291	101886094	RefSeqOnly	17.4415	12.2746	10.9375	-0.0857493	0.963644	0.0160833	55.916	99.1439	95.0448	1.40969	0.0338729	1.47015
raraa	ENSDARG00000056783	30680	Both	1326.52	1857.56	1140.49	1.60391	5.92119e-05	4.22759	1446.1	2019.67	1227.66	1.58505	6.51674e-05	4.18597
rarga	ENSDARG00000034117	30606	Both	2305.18	2311.72	1236.93	1.34163	0.0014924	2.82612	2012.97	2147.44	1095.99	1.44884	0.000537755	3.26942
rasa1b	ENSDARG00000073665	564822	Both	397.278	456.206	291.336	1.16924	0.00633672	2.19814	392.376	448.703	290.085	1.21953	0.00417168	2.37969
rasgef1bb	ENSDARG00000044251	445085	Both	2259.64	2180.79	1945.88	1.54961	0.000248871	3.60403	2229.89	2192.41	1937.53	1.55572	0.000208648	3.68059
rasl11a	ENSDARG00000046013	550538	Ens95only	423.44	664.875	303.268	2.99274	1.98752e-10	9.70169	8.67661	35.7736	19.801	1.75987	0.303776	0.517446
rasl12	ENSDARG00000002701	393366	Both	3986.34	1678.55	2219.32	4.79297	1.03446e-18	17.9853	3833.13	1632.3	1949.41	4.94464	8.56277e-18	17.0674
rassf1	ENSDARG00000004840	447811	Both	1126.91	1275.54	1075.85	1.02531	0.0127825	1.89339	1112.53	1281.72	1079.16	1.02219	0.0120559	1.9188
rassf2b	ENSDARG00000044044	100006341	Both	168.601	126.838	152.131	1.99419	0.00119784	2.9216	165.82	127.763	151.478	1.9947	0.00162078	2.79028
rassf4	ENSDARG00000012460	494494	Both	270.343	234.241	244.603	1.54002	0.00665646	2.17676	255.478	233.039	235.632	1.46392	0.0112496	1.94886
rbck1	ENSDARG00000031954	431715	Both	266.467	115.586	140.199	1.40044	0.0229522	1.63918	263.191	114.475	143.557	1.3381	0.0324738	1.48847
rbms1a	ENSDARG00000074023	564994	Both	3083.26	4687.88	2701.57	1.89422	2.51985e-06	5.59863	3147.68	4806.95	2741.45	1.89824	2.08306e-06	5.6813
rbms2b	ENSDARG00000056150	445147	Both	749.983	1239.74	895.883	1.5791	7.91523e-05	4.10154	740.404	1251.05	894.016	1.58581	8.08549e-05	4.09229
rbms3	ENSDARG00000044574	767747	Both	216.08	344.712	259.518	1.38144	0.0207437	1.68311	5676.43	7284.52	4635.42	1.65912	4.59486e-06	5.33773
rbp4	ENSDARG00000101199	30077	Both	36130	27789.7	20221.5	2.1502	5.26814e-05	4.27834	35515.3	27773.6	19954.5	2.15855	4.57344e-05	4.33976
rbpms2a	ENSDARG00000045930	436682	Both	1591.05	1084.26	1094.75	3.26961	9.69671e-17	16.0134	1585.89	1115.11	1126.68	3.3194	8.21332e-18	17.0855
rbpms2b	ENSDARG00000079578	393229	Both	3157.87	1602.86	1382.11	2.88673	9.17952e-10	9.03718	2976.08	1568.93	1333.6	2.91802	4.15149e-10	9.3818
rcan1a	ENSDARG00000003109	445222	Both	651.148	530.877	515.058	1.01449	0.0110968	1.9548	638.213	533.537	510.866	1.02554	0.00952675	2.02106
rcan2	ENSDARG00000021869	407988	Both	383.712	147.295	160.086	2.26587	9.87317e-05	4.00554	1109.64	859.588	520.767	2.40535	1.85784e-07	6.73099
rcn1	ENSDARG00000070006	562671	Both	916.646	1771.64	1511.37	1.75846	1.77856e-05	4.74993	866.697	1734.51	1478.15	1.78185	1.87717e-05	4.7265
rcn3	ENSDARG00000037961	415248	Both	192.825	1043.34	741.763	2.73881	2.8963e-05	4.53816	191.85	1048.68	737.588	2.73768	2.85566e-05	4.54429
rdh10a	ENSDARG00000058730	562840	Both	1507.72	4507.85	2709.52	1.22644	0.0176258	1.75385	1487.56	4530.98	2694.92	1.23721	0.0168769	1.77271
rdh10b	ENSDARG00000012369	378722	Both	846.88	605.548	464.348	1.85722	0.000142284	3.84684	835.847	608.151	463.344	1.86437	0.000130045	3.8859
reck	ENSDARG00000090039	100334698	RefSeqOnly	84.3004	49.0985	106.392	1.23155	0.0957711	1.01877	5320.69	5720.71	4570.07	2.15443	2.35465e-08	7.62807
relb	ENSDARG00000086173	795414	Both	1042.61	1010.61	1027.13	1.18997	0.0233323	1.63204	986.242	1009.84	997.971	1.20518	0.0213076	1.67147
rem1	ENSDARG00000020544	394149	Both	796.493	993.221	586.649	2.79964	1.06121e-10	9.9742	777.039	990.417	571.259	2.86283	7.21706e-11	10.1416
ren	ENSDARG00000041858	405786	Both	251.932	201.508	193.892	6.08847	1.22977e-16	15.9102	162.928	146.161	142.567	5.90487	0.00723528	2.14054
renbp	ENSDARG00000008931	791728	Both	71.7038	147.295	140.199	1.39404	0.0214124	1.66933	71.341	148.205	139.597	1.40988	0.0228451	1.64121
rerglb	ENSDARG00000054324	566719	Both	767.424	1513.87	800.428	1.73893	9.87317e-05	4.00554	15.4251	111.409	69.3035	2.2845	0.0346037	1.46088
rftn2	ENSDARG00000056078	406729	Both	1030.98	965.603	1057.96	1.25266	0.00152785	2.81592	1011.31	956.688	1046.48	1.29077	0.000909734	3.04109
rgcc	ENSDARG00000035810	431737	Both	1955.38	1330.77	1186.22	2.03004	1.09249e-06	5.96158	1803.77	1205.06	1024.7	1.99189	3.21642e-06	5.49263
rgl1	ENSDARG00000005989	402933	Both	2901.1	3404.16	2467.9	1.99964	1.21569e-07	6.91518	2960.65	3483.32	2522.65	1.99958	8.89986e-08	7.05062
rgmd	ENSDARG00000034013	321842	Both	2075.53	4831.08	2572.31	1.29835	0.00816925	2.08782	2048.64	4856.01	2561.26	1.30732	0.00767294	2.11504
rgs4	ENSDARG00000070047	569876	Both	2723.77	3717.16	3017.76	2.15465	3.64452e-08	7.43836	2688.79	3736.81	3004.8	2.16158	3.07292e-08	7.51245
rgs5a	ENSDARG00000002644	573765	Both	29062.3	11323.3	14224.7	2.5525	1.67096e-06	5.77703	28689.7	11386.2	14169.6	2.55458	1.28249e-06	5.89195
rgs5b	ENSDARG00000017860	550519	Both	10496.9	6492.25	7774.59	3.22361	1.09018e-06	5.9625	10359.9	6525.1	7742.19	3.22794	9.33807e-07	6.02974
rhag	ENSDARG00000019253	405771	Both	1334.27	2057.02	1822.59	1.91519	2.23915e-07	6.64992	106.047	140.028	280.184	1.48696	0.0326564	1.48603
rhbdd1	ENSDARG00000021046	550277	Both	918.584	154.456	406.677	1.88246	0.013444	1.87147	920.685	156.382	404.931	1.89848	0.0126376	1.89833
rhbdf1a	ENSDARG00000036541	798402	Both	1003.85	1008.56	980.4	1.16609	0.00610151	2.21456	991.062	1012.9	976.19	1.17088	0.00554857	2.25582
rhoab	ENSDARG00000094673	100006041	Both	788.742	832.628	565.768	1.10995	0.0157382	1.80305	732.692	798.262	536.607	1.11596	0.0141532	1.84914
rhobtb4	ENSDARG00000016868	553415	RefSeqOnly	55.2313	51.1442	22.8694	0.0409615	0.976965	0.0101208	2205.79	3235.98	2165.24	1.4279	0.000644201	3.19098
rhoca	ENSDARG00000021309	394125	Both	1246.1	1169.16	984.377	1.47905	0.000199362	3.70036	1230.15	1175.42	972.23	1.48648	0.000177641	3.75046
rhocb	ENSDARG00000018328	436718	Both	940.87	1001.4	927.701	1.00962	0.0214276	1.66903	922.613	1002.68	915.797	1.01673	0.0206328	1.68544
rhogb	ENSDARG00000004301	336933	Both	211.235	545.197	331.109	1.58539	0.00486316	2.31308	209.203	547.847	329.687	1.60792	0.00435416	2.3611
rhoj	ENSDARG00000020250	556371	Ens95only	166.663	105.357	127.273	1.32201	0.0368574	1.43348	36.6346	28.6189	49.5025	1.11401	0.296441	0.528061
rhoq	ENSDARG00000025953	327510	Both	879.825	1595.7	988.354	1.41736	0.00112622	2.94838	866.697	1602.66	979.16	1.43174	0.00103872	2.9835
rilp	ENSDARG00000074660	100005026	RefSeqOnly	16.4725	15.3433	14.9148	0.00961985	0.995363	0.00201836	321.999	670.499	551.458	1.33496	0.00366882	2.43547
rin2	ENSDARG00000074589	100006622	Both	848.818	1030.04	746.735	1.27006	0.000928747	3.0321	829.099	992.461	718.777	1.31896	0.000495233	3.30519
rin3	ENSDARG00000077618	799244	Both	906.956	1413.63	858.098	2.16212	1.93893e-07	6.71244	885.979	1415.61	847.483	2.20746	1.18391e-07	6.92668
ripor1	ENSDARG00000062178	566573	Both	247.087	635.211	420.597	1.09796	0.0377314	1.4233	800.177	1309.31	860.354	1.17452	0.00464791	2.33274
ripor3	ENSDARG00000020979	503535	Both	366.271	573.838	386.791	1.58117	0.000307933	3.51154	358.633	570.333	382.159	1.62672	0.000273886	3.56243
ripply1	ENSDARG00000054103	654446	Both	187.98	469.504	211.79	1.71983	0.00142988	2.8447	182.209	459.946	198.01	1.96592	0.000363581	3.4394
rit1	ENSDARG00000069150	793942	RefSeqOnly	13.5656	30.6865	26.8466	0.474563	0.772178	0.112283	340.316	527.405	382.159	1.12543	0.0138451	1.85871
rmdn1	ENSDARG00000074507	558162	Both	382.743	388.696	339.063	1.13186	0.015828	1.80057	377.915	389.421	335.627	1.17353	0.0153265	1.81456
rnd1b	ENSDARG00000004218	553414	Both	1707.33	1727.65	1388.07	1.29366	0.00105927	2.97499	1685.19	1736.55	1382.11	1.3004	0.000910953	3.0405
rnd3b	ENSDARG00000007396	436864	Both	2226.69	3502.36	2102.99	2.50146	6.03134e-10	9.21959	2182.65	3459.82	2068.22	2.51018	5.66808e-10	9.24656
rnf14	ENSDARG00000043905	415177	Both	329.45	352.895	247.586	1.01808	0.0261684	1.58222	303.681	349.559	231.672	1.06271	0.0231229	1.63596
rnf25	ENSDARG00000027182	100003846	Both	237.398	249.584	156.108	1.0778	0.0365496	1.43712	212.095	247.349	154.448	1.14515	0.031677	1.49926
rock2a	ENSDARG00000017500	317747	Both	1316.83	2150.1	1663.5	1.32929	0.000914389	3.03887	1299.56	2157.66	1645.46	1.3439	0.000808073	3.09255
romo1	ENSDARG00000038076	393770	Both	3289.65	2347.52	2627.99	1.18535	0.00418822	2.37797	3247.95	2361.06	2621.65	1.18735	0.00366882	2.43547
ror1	ENSDARG00000015176	568282	Both	436.036	1256.1	897.871	1.41113	0.00477295	2.32121	544.698	1504.53	996.981	1.4157	0.00361487	2.44191
ror2	ENSDARG00000076227	561183	Both	1101.72	1535.35	1171.31	1.8396	6.15352e-06	5.21088	1087.47	1543.37	1166.28	1.85441	4.80157e-06	5.31862
roraa	ENSDARG00000031768	564951	Both	2009.64	1029.02	946.593	1.10482	0.027656	1.55821	1991.76	1046.63	945.498	1.10477	0.0250194	1.60172
rpe65b	ENSDARG00000094752	100002865	Both	451.54	1129.26	653.268	1.52016	0.0013157	2.88084	452.148	1137.6	656.403	1.53249	0.00119562	2.92241
rpl3	ENSDARG00000003599	322571	Both	80088.3	81143.4	86720.6	1.17854	0.00477689	2.32085	78742.2	80701.1	85709.7	1.18123	0.00434257	2.36225
rpl4	ENSDARG00000041182	337090	Both	75760.9	59757.9	70085.7	1.03419	0.0282973	1.54826	73243.1	59204.3	68980.8	1.0386	0.0255796	1.59211
rpl5a	ENSDARG00000020197	326961	Both	31415	27636.3	30293	1.25031	0.00295384	2.52961	31007.3	27777.7	30163.9	1.2556	0.0025316	2.59661
rplp0	ENSDARG00000051783	58101	Both	80563.1	68317.4	80905.9	1.0515	0.0172633	1.76288	79579	68671	80586.1	1.05691	0.015482	1.81017
rps3	ENSDARG00000103007	336550	Both	58305.8	44103.7	46881.2	1.09084	0.0183613	1.7361	57358.2	44163	46534.4	1.09771	0.0164113	1.78486
rps3a	ENSDARG00000035692	337240	Both	67890.9	41878.9	49095.6	1.07788	0.0333908	1.47637	67123.2	42155.6	48925.3	1.08158	0.0305723	1.51467
rps4x	ENSDARG00000014690	449547	Both	90726.6	54919.7	61257.1	1.095	0.0335917	1.47377	89293.9	54908.4	60866.3	1.09684	0.0313473	1.5038
rps6	ENSDARG00000019778	445028	Both	60862.9	45345.5	54555.4	1.00124	0.0363004	1.44009	60007.5	45504	54208.2	1.00706	0.0327774	1.48443
rpz5	ENSDARG00000075718	100003142	Both	3396.24	4540.58	3426.43	1.82101	1.86581e-06	5.72913	3356.89	4563.69	3412.7	1.82881	1.54462e-06	5.81118
rras	ENSDARG00000006553	449660	Both	1635.62	2290.24	1868.33	1.5866	0.000107806	3.96736	1260.04	1953.24	1587.05	1.6124	9.58092e-05	4.01859
rras2	ENSDARG00000036252	550513	Ens95only	1322.64	1906.66	1429.83	1.67341	3.26121e-05	4.48662	50.1315	23.5084	28.7115	0.467582	0.723949	0.140292
rrbp1a	ENSDARG00000013763	553448	Both	693.783	1258.15	895.883	1.17466	0.0113657	1.9444	679.668	1264.34	890.055	1.17886	0.0110079	1.9583
rrbp1b	ENSDARG00000041703	567029	Both	935.056	1581.38	1288.64	2.01481	1.55766e-06	5.80753	824.278	1389.04	1132.62	2.08411	5.3577e-07	6.27102
rreb1b	ENSDARG00000042652	555701	Both	634.675	1001.4	854.121	1.05087	0.0155434	1.80845	593.866	990.417	833.623	1.04024	0.0198075	1.70317
rspo1	ENSDARG00000104340	436625	Both	288.753	294.591	146.165	1.46173	0.00576936	2.23887	264.155	288.233	141.577	1.47537	0.00550857	2.25896
rspo2	ENSDARG00000079570	566054	Ens95only	530.996	1069.94	612.501	1.02447	0.0427854	1.3687	51.0956	131.851	45.5423	0.866453	0.335753	0.47398
rspo3	ENSDARG00000070081	100007702	Both	424.409	781.484	372.87	1.68067	0.000532725	3.2735	751.009	887.185	423.742	1.55443	0.000609179	3.21526
rspo4	ENSDARG00000038593	570865	Both	40.6967	55.2358	50.7103	2.25083	0.0036378	2.43916	40.4909	55.1935	48.5125	2.41367	0.00394521	2.40393
rspry1	ENSDARG00000062558	565154	Both	804.245	1319.52	796.451	1.20559	0.00973189	2.0118	788.608	1318.51	793.03	1.21482	0.00929039	2.03197
rsrp1	ENSDARG00000030440	724003	Both	13345.6	10668.7	12799.9	1.4088	0.0137721	1.861	13329.2	10752.5	12745.9	1.41761	0.0121829	1.91425
rsu1	ENSDARG00000102885	553276	RefSeqOnly	65.89	23.5263	18.8921	1.58045	0.157338	0.803167	2115.17	2619.65	1988.02	1.5034	0.000151312	3.82013
rtca	ENSDARG00000002215	321129	Both	1703.45	3122.87	2310.8	1.15962	0.0285702	1.54409	1675.55	3099.01	2270.19	1.17422	0.0249328	1.60323
rxraa	ENSDARG00000057737	555578	RefSeqOnly	104.649	72.6248	70.5967	1.23852	0.0701065	1.15424	1704.47	1535.2	1199.94	1.07583	0.00721716	2.14163
s100v2	ENSDARG00000070702	336965	Both	2180.18	2832.37	1836.51	1.03049	0.0260136	1.5848	2084.32	2805.67	1805.85	1.04243	0.0254221	1.59479
s1pr3a	ENSDARG00000042470	798390	Both	157.942	281.293	200.853	3.01669	6.41167e-07	6.19303	654.602	866.743	640.563	3.76715	1.07569e-13	12.9683
s1pr5a	ENSDARG00000040526	492350	Both	1749.96	2244.21	1688.36	3.15697	3.56699e-18	17.4477	1726.65	2255.78	1681.11	3.16512	2.79258e-18	17.554
samd4a	ENSDARG00000075759	100149858	Both	2337.16	1122.1	1546.17	1.35664	0.0172736	1.76262	482.998	642.902	474.234	1.57485	0.0024374	2.61307
SAMD8	ENSDARG00000074663	100037314	Both	455.416	717.042	504.12	1.91237	6.7479e-05	4.17083	440.579	721.604	490.075	1.91102	7.73136e-05	4.11174
sardh	ENSDARG00000058102	394103	RefSeqOnly	408.905	499.168	394.745	0.944511	0.0316477	1.49966	377.915	490.609	361.368	1.18099	0.00947378	2.02348
sat1a.1	ENSDARG00000035652	565700	Both	1842.01	1333.84	706.962	3.26358	0.0244646	1.61146	1764.24	1302.16	674.224	3.3451	0.0340093	1.4684
sat1a.2	ENSDARG00000095908	431716	Both	21801.8	17944.5	10848	2.2299	1.58132e-05	4.80098	21519	18037	10801.5	2.23565	1.30471e-05	4.88448
sat1b	ENSDARG00000032272	567881	Both	887.577	1359.41	811.365	1.28963	0.00154246	2.81178	764.506	1119.2	714.816	1.45513	0.000328303	3.48373
sav1	ENSDARG00000006196	447821	Both	926.335	1484.21	1198.16	1.61044	0.000116029	3.93543	914.901	1491.25	1193.01	1.61908	0.000107474	3.9687
SBNO2	ENSDARG00000016188	100002292	Both	6151.02	7872.12	4471.46	2.03609	0.000150384	3.8228	6076.52	7778.2	4373.05	2.0465	0.000122443	3.91207
scara3	ENSDARG00000008060	564588	Both	360.457	621.914	490.2	1.15367	0.0167228	1.77669	355.741	625.527	488.095	1.1632	0.0162816	1.7883
scara5	ENSDARG00000010425	564500	RefSeqOnly	104.649	148.318	69.6024	0.847833	0.218032	0.66148	255.478	995.528	373.249	1.76995	0.00246651	2.60792
SCARF2	ENSDARG00000114825	100329632	Both	847.849	478.71	558.808	1.87843	0.000724606	3.1399	924.541	640.858	680.165	1.84777	0.00030085	3.52165
scin	ENSDARG00000010728	566764	Ens95only	36.8209	119.677	73.5797	1.61202	0.0356885	1.44747	113.76	188.067	110.886	1.06151	0.120411	0.919335
scinla	ENSDARG00000102415	323285	Both	3972.78	17463.7	4082.68	1.87373	0.0106866	1.97116	3920.86	17553.6	4066.14	1.88726	0.00998375	2.00071
scpp1	ENSDARG00000090416	100270757	Ens95only	182.166	86.9452	224.716	2.2742	0.000543771	3.26458	14.461	18.3978	61.3831	2.51647	0.0591313	1.22818
scube1	ENSDARG00000063097	797832	Both	450.571	297.659	251.563	1.96554	1.29517e-05	4.88767	313.322	222.818	192.07	1.80875	9.31774e-05	4.03069
scube3	ENSDARG00000011490	100000687	Both	230.615	194.348	162.074	1.69045	0.000595192	3.22534	819.458	640.858	622.742	2.09773	2.22222e-06	5.65321
sdc2	ENSDARG00000002731	282667	Both	1348.81	795.804	1047.02	1.26128	0.0119996	1.92083	726.907	602.018	547.498	1.34727	0.00470312	2.32761
sdc4	ENSDARG00000059906	568593	Both	24452.9	41594.6	30607.2	2.40936	3.82185e-05	4.41773	688.345	2329.37	1493.99	2.15831	0.00416825	2.38005
sdcbp2	ENSDARG00000012513	325004	Both	3496.04	4626.51	3600.43	1.08386	0.00410533	2.38665	3450.4	4650.57	3584.97	1.09123	0.00361425	2.44198
sdhaf2	ENSDARG00000062971	569482	RefSeqOnly	378.867	256.744	288.353	0.800821	0.116553	0.933478	239.089	202.376	215.831	1.04489	0.0475022	1.32329
sdr16c5b	ENSDARG00000017794	406799	Both	634.675	1003.45	626.422	1.00491	0.0222137	1.65338	626.644	1006.77	618.782	1.01366	0.0214451	1.66867
sec14l1	ENSDARG00000098821	110439320	Ens95only	740.293	610.662	610.513	1.04168	0.0274975	1.56071	6.74848	1.0221	113.856	-0.691267	0.864805	0.063082
sec16b	ENSDARG00000099554	553356	RefSeqOnly	21.3173	43.984	50.7103	0.667542	0.540891	0.26689	80.0177	121.63	107.916	1.51648	0.00944199	2.02494
sec23a	ENSDARG00000104230	406774	Both	1240.28	1581.38	1171.31	1.00784	0.00914448	2.03884	1224.37	1589.37	1165.29	1.01397	0.00843313	2.07401
sec23b	ENSDARG00000019360	327268	RefSeqOnly	1259.66	1516.94	1209.09	0.989983	0.0122587	1.91155	1241.72	1524.98	1201.92	1.00447	0.0103578	1.98473
sec24d	ENSDARG00000045946	553407	Both	123.059	173.89	125.284	1.2906	0.0226294	1.64533	1029.62	1263.32	991.041	1.88052	4.07874e-06	5.38947
sec61a1	ENSDARG00000021669	192298	Both	3722.78	4559	4473.45	1.20326	0.00118218	2.92732	3674.06	4582.08	4454.24	1.21063	0.00100133	2.99942
sec61g	ENSDARG00000018637	436772	Both	10463.9	3634.31	4164.21	1.2947	0.0307245	1.51251	10297.2	3636.64	4121.58	1.29658	0.0288249	1.54023
selenbp1	ENSDARG00000024717	393542	Both	966.063	700.676	819.32	1.8611	0.000140495	3.85234	953.463	704.228	815.802	1.86467	0.000134242	3.87211
selenol	ENSDARG00000088444	100462964	RefSeqOnly	14.5345	26.595	32.8126	1.22768	0.333721	0.476617	153.287	290.277	270.284	1.64087	0.0017845	2.74848
selenon	ENSDARG00000033616	352914	Both	759.672	2111.23	1091.76	1.20092	0.0256239	1.59135	731.728	2108.6	1074.2	1.21663	0.024978	1.60244
selenop	ENSDARG00000093549	352931	Both	26144.7	31103.9	22032.1	2.71097	1.1722e-13	12.931	25795.6	31254.9	21936.5	2.7195	7.22051e-14	13.1414
selenot1b	ENSDARG00000027595	352921	Both	1042.61	1232.58	1090.77	1.07073	0.00828313	2.08181	1022.88	1238.79	1086.09	1.07457	0.00791393	2.10161
sema3c	ENSDARG00000034300	553130	RefSeqOnly	28.1001	62.396	38.7785	1.317	0.127539	0.894359	650.746	2108.6	1146.48	1.63928	0.00132385	2.87816
sema3d	ENSDARG00000017369	30250	Both	1491.24	3526.91	2970.03	1.45738	0.00574138	2.24098	1472.13	3544.65	2957.28	1.46616	0.00532275	2.27386
sema3e	ENSDARG00000036571	565658	Both	260.653	145.25	163.069	1.46154	0.00928907	2.03203	1155.92	1969.59	1559.33	1.81811	2.89209e-05	4.53879
sema3fa	ENSDARG00000011163	544658	Both	1228.65	2443.67	1835.52	1.29097	0.00192519	2.71553	1186.77	2421.36	1812.78	1.31232	0.00166717	2.77802
sema4ba	ENSDARG00000074414	572261	Both	328.481	251.63	270.455	1.38645	0.00129618	2.88734	332.603	183.978	205.931	1.22073	0.016782	1.77516
sema4bb	ENSDARG00000076104	561146	Ens95only	437.974	556.449	674.149	1.27458	0.00173959	2.75955	83.8739	62.3482	124.746	0.620087	0.473655	0.324537
sema5bb	ENSDARG00000075648	100000009	RefSeqOnly	125.966	58.3044	102.415	0.975465	0.149682	0.82483	658.459	399.642	441.563	1.73159	4.28677e-05	4.36787
sema6ba	ENSDARG00000036626	562398	Both	314.915	147.295	112.358	2.27028	0.000160141	3.7955	439.615	294.365	171.279	1.99748	0.000158896	3.79889
sema6e	ENSDARG00000000189	556743	Ens95only	2722.81	2370.02	2260.09	1.25444	0.00336129	2.47349	392.376	258.592	300.975	0.262857	0.712603	0.147152
sept10	ENSDARG00000099236	550129	Both	4053.2	5061.23	3754.55	2.14371	6.36144e-09	8.19644	4214.91	5215.79	3881	2.1003	1.74508e-08	7.75818
sept15	ENSDARG00000102889	792259	Both	5082.25	4343.17	3373.73	2.43356	8.4273e-12	11.0743	5016.05	4370.51	3363.2	2.43633	4.63011e-12	11.3344
sept2	ENSDARG00000027590	323457	Both	4885.55	7658.34	4501.29	2.13853	2.37561e-07	6.62422	4822.27	7697.45	4482.95	2.14652	2.10891e-07	6.67594
sept7a	ENSDARG00000087647	394136	Both	618.203	1496.48	1131.54	1.5565	0.000718047	3.14385	610.255	1507.6	1127.67	1.56505	0.000700383	3.15466
sept7b	ENSDARG00000052673	100000597	Both	2343.94	2616.54	1827.56	1.22855	0.00141615	2.84889	2265.56	2614.54	1808.82	1.24843	0.00111407	2.95309
sept8a	ENSDARG00000032606	321590	Both	1333.3	1609	1278.7	1.64688	1.41642e-05	4.84881	1315.95	1614.92	1274.19	1.65497	1.25153e-05	4.90256
sept9a	ENSDARG00000020235	337243	Both	2264.48	4106.88	3003.84	1.53681	0.000540977	3.26682	2165.3	4051.61	2912.73	1.6018	0.000348729	3.45751
serinc2	ENSDARG00000056532	569338	Both	1346.87	1750.16	1499.44	1.24328	0.00364738	2.43802	1329.45	1759.04	1493	1.24992	0.00338122	2.47093
SERP1	ENSDARG00000099439	336797	Both	5127.79	3516.68	4350.15	1.34062	0.00543702	2.26464	2399.57	2263.96	2169.2	1.34674	0.00125842	2.90018
serp1	ENSDARG00000099439	336797	Both	2456.34	2278.99	2205.4	1.34605	0.00137727	2.86098	2399.57	2263.96	2169.2	1.34674	0.00125842	2.90018
serpina10a	ENSDARG00000005924	565064	Both	5079.34	5550.17	4609.67	1.35217	6.52142e-05	4.18566	3476.43	4224.35	3455.28	1.37097	4.85518e-05	4.31379
serpine2	ENSDARG00000029353	393153	Both	1261.6	1890.29	1150.43	1.48702	0.00031041	3.50806	1245.58	1900.09	1145.49	1.49459	0.0002875	3.54136
serpinf1	ENSDARG00000069048	447800	Both	4695.63	13412.1	7097.46	2.30122	3.32613e-06	5.47806	4631.38	13478.5	7063.02	2.31166	3.04814e-06	5.51597
serpinh1a	ENSDARG00000075954	555328	Both	2630.75	2857.94	4350.15	1.96259	2.1714e-05	4.66326	2613.59	2879.26	4344.34	1.96732	1.82709e-05	4.73824
serpinh1b	ENSDARG00000019949	30449	Both	18531.6	22083.1	37621.1	2.51108	0.00141539	2.84912	17989.5	21845.4	37172.4	2.52413	0.00137109	2.86293
serpinh2	ENSDARG00000036445	554550	Both	1558.1	1840.17	1793.75	2.06236	7.02647e-08	7.15326	327.783	458.924	424.732	2.70581	1.6874e-10	9.77278
sertad2a	ENSDARG00000093412	571662	Both	170.539	290.499	170.029	1.21753	0.0189797	1.72171	254.514	444.614	224.741	1.30184	0.0079213	2.1012
sesn3	ENSDARG00000015822	406840	Both	2724.74	2884.53	2123.87	1.99737	1.53259e-07	6.81457	2689.75	2898.68	2115.74	2.00311	1.23744e-07	6.90748
sfrp1b	ENSDARG00000057678	798564	Both	613.358	474.618	339.063	2.606	1.45989e-08	7.83568	605.435	477.322	337.607	2.61928	1.2315e-08	7.90956
sfrp2	ENSDARG00000070050	566878	Both	3722.78	6429.85	3506.97	1.59027	0.00184312	2.73445	9209.74	25314.4	9672.79	1.80401	0.000542982	3.26521
sfrp5	ENSDARG00000039041	117510	Both	1624.96	954.351	1251.85	1.7023	0.000143686	3.84259	1604.21	959.754	1246.47	1.70465	0.000122443	3.91207
sft2d1	ENSDARG00000007362	393343	Both	275.187	605.548	423.58	1.12686	0.019764	1.70413	271.867	608.151	421.762	1.13577	0.0196553	1.70652
sfxn2	ENSDARG00000017960	334757	Both	180.228	427.566	449.433	1.26783	0.0165681	1.78073	173.532	429.283	456.413	1.25678	0.0205734	1.68669
sgk1	ENSDARG00000025522	324140	Both	5846.76	7225.66	4750.86	1.50255	0.000994582	3.00236	5765.13	7263.06	4730.46	1.50828	0.000888132	3.05152
sgk2b	ENSDARG00000006598	559050	Both	144.377	116.609	80.5399	1.84416	0.00118197	2.92739	142.682	117.542	80.1941	1.89413	0.00111137	2.95414
sgk3	ENSDARG00000062460	564523	Both	608.513	1243.83	787.502	1.06302	0.0210189	1.67739	600.614	1250.03	784.12	1.0848	0.0184822	1.73325
sgms1	ENSDARG00000029621	566563	Both	1168.58	882.749	762.644	1.32706	0.00104821	2.97955	1143.38	884.118	751.448	1.33492	0.000900909	3.04532
sgsh	ENSDARG00000032087	563849	Both	374.022	328.346	282.387	1.04686	0.0285214	1.54483	369.238	330.139	281.174	1.05136	0.0281797	1.55006
sh3bgrl	ENSDARG00000058302	394184	Both	1870.11	4147.8	3341.91	1.28101	0.00498344	2.30247	1845.23	4169.16	3328.55	1.29104	0.00452936	2.34396
sh3bp5a	ENSDARG00000100529	555222	Both	1033.89	1455.56	1288.64	1.43648	0.000157818	3.80184	930.326	1384.95	1235.58	1.46831	0.000135573	3.86783
sh3bp5la	ENSDARG00000019160	406439	Both	924.397	1466.82	920.741	1.4981	0.00408387	2.38893	895.619	1443.21	893.026	1.53655	0.00283779	2.54702
sh3d21	ENSDARG00000099448	641492	Both	653.086	642.371	554.831	1.89341	0.00228849	2.64045	640.141	600.996	532.647	1.85195	0.0034182	2.4662
sh3gl1b	ENSDARG00000002642	378838	Both	301.35	398.925	216.762	1.77899	9.01102e-05	4.04523	1773.89	3501.72	2173.16	1.76937	2.23992e-05	4.64977
sh3glb1a	ENSDARG00000045294	792229	Both	405.029	881.726	587.643	1.28305	0.00503774	2.29776	486.854	970.997	630.662	1.22424	0.0060093	2.22118
sh3kbp1	ENSDARG00000075853	793623	Both	890.483	1148.7	1089.78	1.61961	6.24062e-05	4.20477	1878	1938.93	1770.21	1.61036	4.47341e-05	4.34936
sh3pxd2aa	ENSDARG00000060148	562018	Both	1310.05	1666.28	1232.96	1.37782	0.000462559	3.33483	3272.05	4874.41	3288.95	1.5227	0.000126961	3.89633
sh3pxd2ab	ENSDARG00000061758	567923	Both	74.6107	190.257	99.432	1.41421	0.0374873	1.42612	456.004	1113.07	660.364	1.76394	0.000589149	3.22977
sh3pxd2b	ENSDARG00000103251	553242	Both	1666.63	2590.97	1649.58	1.9143	1.47291e-06	5.83183	1644.7	2605.34	1642.49	1.92525	1.24535e-06	5.90471
shisa3	ENSDARG00000075467	791180	Both	1219.93	1906.66	1304.55	1.50639	0.00055887	3.25269	1204.12	1916.44	1298.95	1.51317	0.000530748	3.27511
shroom4	ENSDARG00000079900	559035	Both	1114.32	1694.92	1558.1	1.97758	5.1888e-07	6.28493	1094.22	1702.82	1551.41	1.98936	4.3051e-07	6.36602
si:cabz01007802.1	ENSDARG00000068030	100150119	Ens95only	436.036	269.019	284.376	1.28084	0.00866066	2.06245	60.7363	14.3094	6.93035	1.56486	0.266565	0.574197
si:ch1073-184j22.1	ENSDARG00000055498	100322583	Both	533.902	733.408	609.518	1.59085	4.99182e-05	4.30174	559.16	886.163	694.025	1.6589	2.85695e-05	4.5441
si:ch1073-291c23.2	ENSDARG00000074869	799862	Both	4638.46	5822.26	5027.28	2.39233	1.39054e-08	7.85682	4716.22	6088.66	5088.86	2.41578	6.57243e-09	8.18227
si:ch1073-303k11.2	ENSDARG00000088247	100333296	Both	1595.89	2026.33	1758.95	1.40949	0.000380548	3.41959	58.8082	346.493	346.518	1.86645	0.0197464	1.70451
si:ch1073-392o20.2	ENSDARG00000102599	100537576	Ens95only	4175.29	3087.07	2382.39	1.60848	0.000355967	3.44859	309.466	125.719	109.896	1.2075	0.077304	1.1118
si:ch1073-396h14.1	ENSDARG00000057590	560975	Ens95only	343.015	222.989	200.853	1.15887	0.027389	1.56242	22.1736	25.5526	0	-0.206574	0.932344	0.0304238
si:ch1073-459j12.1	ENSDARG00000006901	567630	Both	2701.49	5761.91	3314.07	1.81034	0.000371231	3.43036	2695.53	5841.31	3312.71	1.81839	0.000345426	3.46165
si:ch211-106h11.3	ENSDARG00000027360	497580	RefSeqOnly	13.5656	15.3433	28.8353	1.52213	0.343102	0.464576	228.484	208.509	126.726	2.55731	4.92826e-05	4.30731
si:ch211-106h4.12	ENSDARG00000092920	561742	Both	4403	3626.13	3468.19	1.50398	0.00321515	2.4928	4345.05	3644.82	3453.3	1.50909	0.00290864	2.53631
si:ch211-106j24.1	ENSDARG00000036809	555478	Both	2272.23	4846.43	3101.29	2.70203	1.67367e-09	8.77633	1905	3726.58	1981.09	2.82411	8.67999e-11	10.0615
si:ch211-106n13.3	ENSDARG00000052633	563353	Both	1576.51	1644.8	682.104	2.20446	4.59561e-06	5.33766	1556.01	1656.83	681.155	2.21318	3.85456e-06	5.41403
si:ch211-120e1.7	ENSDARG00000094634	101883503	Both	230.615	149.341	181.961	2.50317	1.03467e-06	5.9852	45.3112	51.1051	64.3533	2.00611	0.0266637	1.57408
si:ch211-125e6.11	ENSDARG00000025783	100170830	Both	40.6967	27.6179	1.98864	3.86615	0.0183791	1.73567	40.4909	30.6631	1.9801	3.91905	0.0194566	1.71093
si:ch211-125e6.12	ENSDARG00000092090	100126100	Ens95only	23.2553	18.4119	6.96024	3.64952	0.0383333	1.41642	23.1376	18.3978	6.93035	3.06731	0.0643003	1.19179
si:ch211-127i16.2	ENSDARG00000092976	558050	Ens95only	349.798	545.197	399.717	1.43433	0.00177105	2.75177	46.2753	22.4862	46.5324	0.692341	0.524711	0.28008
si:ch211-140m22.7	ENSDARG00000077967	570370	Both	1459.27	1867.79	1273.72	1.12622	0.00553369	2.25699	1415.25	1811.17	1260.33	1.13575	0.00522426	2.28197
si:ch211-149b19.3	ENSDARG00000076011	562087	Both	624.986	563.609	510.086	1.3334	0.00310681	2.50769	606.399	551.935	498.985	1.37254	0.0024584	2.60935
si:ch211-14k19.8	ENSDARG00000088975	567378	Both	346.891	183.096	230.682	2.34256	7.27316e-05	4.13828	349.957	183.978	230.682	2.30227	5.98285e-05	4.22309
si:ch211-156j16.1	ENSDARG00000092035	564557	Both	1940.85	2140.9	1804.69	1.5774	3.19031e-06	5.49617	1915.6	2152.55	1796.94	1.57618	2.82912e-06	5.54835
si:ch211-158d24.4	ENSDARG00000093048	560966	Both	4.84485	102.288	69.6024	2.58962	0.0308134	1.51126	70.377	220.774	98.015	2.41319	0.000309567	3.50925
si:ch211-159i8.4	ENSDARG00000076332	792773	Both	815.873	1614.11	938.638	1.41428	0.00535026	2.27163	702.806	1432.99	819.762	1.40972	0.00648605	2.18802
si:ch211-15b10.6	ENSDARG00000091111	560548	Both	2422.42	1940.41	1945.88	1.80243	7.61927e-05	4.11809	2390.89	1951.19	1937.53	1.80807	6.60233e-05	4.1803
si:ch211-160j14.3	ENSDARG00000089078	101886266	Both	1300.36	2109.19	1186.22	2.44045	4.22281e-08	7.3744	1740.14	3158.3	1791	2.6178	3.73774e-09	8.42739
si:ch211-161c3.6	ENSDARG00000078781	100334833	Ens95only	1002.88	1004.47	922.729	1.34164	0.0049049	2.30937	7.71254	16.3536	14.8508	2.53661	1	0
si:ch211-166a6.5	ENSDARG00000079745	100000230	Both	919.553	826.491	686.081	1.04397	0.0236139	1.62683	871.518	769.643	653.433	1.12273	0.013797	1.86022
si:ch211-170d8.8	ENSDARG00000090945	101885153	Both	197.67	206.623	170.029	1.104	0.0303239	1.51822	177.389	199.31	161.378	1.06962	0.0422978	1.37368
si:ch211-175m2.5	ENSDARG00000089019	568697	Both	231.584	247.538	163.069	1.53135	0.00374297	2.42678	229.448	248.371	162.368	1.52946	0.00402854	2.39485
si:ch211-178n15.1	ENSDARG00000097617	101884003	Both	2414.67	1890.29	1386.08	2.05615	1.1676e-05	4.9327	540.842	100.166	202.96	1.75264	0.0304041	1.51707
si:ch211-181d7.1	ENSDARG00000088274	100149909	Ens95only	437.974	209.691	312.217	1.13454	0.0459547	1.33767	30.8502	1.0221	8.91045	0.542445	0.8116	0.0906579
si:ch211-181d7.3	ENSDARG00000068621	100536895	Both	396.309	403.016	456.393	1.34036	0.000854573	3.06825	379.843	402.708	438.592	1.41075	0.000525103	3.27976
si:ch211-183d21.1	ENSDARG00000092499	571430	Both	1882.71	1624.34	1378.13	1.62546	0.00245603	2.60977	1171.34	1284.78	1103.91	1.66696	0.00195851	2.70807
si:ch211-191i18.2	ENSDARG00000070141	564095	RefSeqOnly	25.1932	45.0069	31.8183	2.22576	0.0685449	1.16402	25.0658	55.1935	31.6816	2.23374	0.0451862	1.34499
si:ch211-194p6.10	ENSDARG00000105568	565124	Both	222.863	109.449	160.086	1.9717	0.00123789	2.90732	75.1973	69.503	101.975	1.86503	0.00702576	2.15331
si:ch211-195b13.1	ENSDARG00000016623	768159	Both	1877.86	3132.07	1821.59	1.18185	0.00413542	2.38348	1852.94	3145.01	1810.8	1.19592	0.00362691	2.44046
si:ch211-195m9.3	ENSDARG00000096365	100332163	Both	194.763	419.383	250.569	1.44424	0.00515408	2.28785	204.382	421.106	250.483	1.43255	0.00560915	2.2511
si:ch211-195o20.7	ENSDARG00000089221	564006	Both	434.099	697.607	506.109	2.21679	8.86562e-07	6.05229	433.831	728.759	515.816	2.23619	1.09571e-06	5.9603
si:ch211-196g2.4	ENSDARG00000077087	103908668	RefSeqOnly	59.1072	54.2129	21.875	-0.0119244	0.993299	0.00292004	407.801	403.73	227.712	1.12298	0.0174144	1.75909
si:ch211-196i2.1	ENSDARG00000007912	564099	Both	679.248	1263.26	805.399	1.58248	0.000629135	3.20126	633.393	1267.41	752.438	1.62138	0.000488733	3.31093
si:ch211-199o1.2	ENSDARG00000056210	798846	Ens95only	601.73	41.9383	233.665	2.31507	0.0103264	1.98605	1318.85	74.6135	378.199	2.64098	0.121556	0.915224
si:ch211-1a19.3	ENSDARG00000100968	557223	Both	670.527	516.557	946.593	1.92565	0.000114639	3.94067	607.363	488.565	897.976	2.08619	3.86564e-05	4.41278
si:ch211-1i11.3	ENSDARG00000104760	100005496	RefSeqOnly	71.7038	122.746	108.381	1.01559	0.129463	0.887855	214.023	262.68	280.184	1.20143	0.00938871	2.02739
si:ch211-202p1.5	ENSDARG00000096755	103909337	Both	34.8829	80.8079	40.7671	3.89136	1.47269e-05	4.83189	22.1736	30.6631	19.801	4.23977	0.00147712	2.83058
si:ch211-204a13.2	ENSDARG00000104274	101885131	Both	345.922	294.591	282.387	1.05444	0.0261909	1.58185	363.454	303.564	293.055	1.05798	0.02694	1.5696
si:ch211-209l18.4	ENSDARG00000090847	100149940	Ens95only	594.948	875.589	712.928	1.06866	0.0123522	1.90825	14.461	36.7957	60.3931	0.78263	0.54599	0.262816
si:ch211-212g7.6	ENSDARG00000079369	556439	RefSeqOnly	343.984	531.9	574.717	0.997416	0.0401562	1.39625	340.316	534.559	572.249	1.00054	0.0406985	1.39042
si:ch211-212k18.8	ENSDARG00000086421	100001422	Both	4014.44	4860.75	3197.73	1.95139	8.81745e-06	5.05466	3908.33	4799.79	3119.65	1.98894	6.52047e-06	5.18572
si:ch211-212k18.9	ENSDARG00000100946	100334500	Both	1187.96	1689.81	1144.46	1.92456	5.87427e-06	5.23105	1196.41	1741.66	1152.42	1.93846	5.25829e-06	5.27916
si:ch211-218g4.2	ENSDARG00000078145	568268	Ens95only	278.094	271.064	270.455	1.32481	0.00852387	2.06936	193.778	170.691	191.08	0.966984	0.10801	0.966537
si:ch211-225b11.1	ENSDARG00000002405	561694	Both	633.706	879.681	575.711	1.64696	2.74184e-05	4.56196	1052.76	1328.73	914.807	1.46161	7.90853e-05	4.1019
si:ch211-236l14.4	ENSDARG00000062059	797251	Both	703.472	1071.98	807.388	2.04404	2.48197e-07	6.6052	688.345	1067.07	788.08	2.06992	1.82085e-07	6.73973
si:ch211-237c6.4	ENSDARG00000058903	100332121	RefSeqOnly	117.245	133.998	121.307	1.15466	0.0758507	1.12004	348.993	317.874	255.433	1.14694	0.0157794	1.80191
si:ch211-240l19.8	ENSDARG00000074547	799298	Both	27.1312	25.5721	15.9091	3.17508	0.0164858	1.78289	26.9939	25.5526	15.8408	3.16472	0.0221577	1.65447
si:ch211-241f5.3	ENSDARG00000097680	100538283	Ens95only	59.1072	63.4188	48.7217	1.5401	0.0401981	1.39579	85.8021	88.9229	77.2239	1.02588	0.155658	0.807828
si:ch211-250c4.4	ENSDARG00000092199	100535981	Both	2930.17	3616.92	2135.8	3.22431	1.31187e-11	10.8821	169.676	291.299	125.736	2.59467	2.77983e-06	5.55598
si:ch211-251b21.1	ENSDARG00000007275	571720	Both	16662.4	30377.6	18775.8	1.28022	0.00130846	2.88324	16446	30533.3	18696.1	1.28885	0.00118797	2.92519
si:ch211-263k4.2	ENSDARG00000078324	796720	RefSeqOnly	87.2073	86.9452	113.353	0.264037	0.800862	0.0964421	580.369	966.909	909.856	1.03049	0.025672	1.59054
si:ch211-266i6.3	ENSDARG00000086112	568826	Both	269.374	585.09	371.876	1.38013	0.00475374	2.32296	376.951	710.361	455.423	1.33098	0.00430818	2.36571
si:ch211-281l24.3	ENSDARG00000068637	798456	Both	895.328	1843.24	1221.03	1.11253	0.0140608	1.85199	805.961	1804.01	1173.21	1.16046	0.0121739	1.91457
si:ch211-285f17.1	ENSDARG00000059333	562465	RefSeqOnly	585.258	330.392	399.717	0.108481	0.897941	0.0467524	2427.52	4569.82	2622.64	1.25643	0.00353143	2.45205
si:ch211-286o17.1	ENSDARG00000100446	100332904	Both	6856.43	6472.81	4403.84	2.15117	4.29202e-07	6.36734	5290.81	4136.45	2885.01	2.28368	7.3958e-07	6.13101
si:ch211-37e10.2	ENSDARG00000096932	101886867	Both	562.972	1115.97	834.235	2.03803	1.47677e-05	4.83069	554.339	1119.2	829.662	2.05297	1.49214e-05	4.82619
si:ch211-43f4.1	ENSDARG00000098431	100318854	Both	611.42	1462.72	854.121	1.42171	0.00258	2.58838	505.172	1246.96	674.224	1.48283	0.00246441	2.60829
si:ch211-51c14.1	ENSDARG00000054645	568811	Both	66.8589	201.508	104.404	1.72029	0.0114531	1.94108	66.5207	202.376	103.955	1.8161	0.00824536	2.08379
si:ch211-59h6.1	ENSDARG00000013022	103908669	Both	103.68	126.838	80.5399	1.47634	0.0179953	1.74484	104.119	130.829	80.1941	1.64434	0.00762314	2.11787
si:ch211-67e16.11	ENSDARG00000095580	558829	Ens95only	1176.33	2444.69	1425.86	1.11938	0.0394306	1.40417	714.374	1271.5	766.299	1.06471	0.0572479	1.24224
si:ch211-67e16.3	ENSDARG00000078193	100004440	Both	125.966	98.1969	69.6024	2.1758	0.00725434	2.1394	185.101	148.205	99.9951	1.95275	0.0103578	1.98473
si:ch211-71n6.4	ENSDARG00000102234	100148657	Both	96.897	123.769	84.5172	1.4917	0.00769957	2.11353	260.298	226.907	181.179	1.63033	0.000308184	3.51119
si:ch211-74f19.2	ENSDARG00000076239	560941	Ens95only	670.527	682.264	458.382	1.45679	0.000431349	3.36517	4.82034	1.0221	5.9403	0.165244	1	0
si:ch211-74m13.1	ENSDARG00000094952	100334824	RefSeqOnly	8.72073	11.2517	15.9091	0.0306953	0.991023	0.00391621	4293.96	6663.08	3517.65	2.45115	9.33264e-07	6.03
si:ch211-74m13.3	ENSDARG00000076144	100334824	Both	213.173	284.362	231.677	2.15381	0.0015924	2.79795	4293.96	6663.08	3517.65	2.45115	9.33264e-07	6.03
si:ch211-76l23.7	ENSDARG00000075345	566173	Both	35.8519	328.346	149.148	3.12217	0.000119581	3.92234	40.4909	351.603	169.299	2.91049	0.000328213	3.48384
si:ch211-79k12.2	ENSDARG00000090679	568844	RefSeqOnly	198.639	549.289	235.654	1.18489	0.053036	1.27543	202.454	555.002	234.642	1.20155	0.0493697	1.30654
si:ch73-138n13.1	ENSDARG00000075349	504038	Both	3098.77	2524.48	2409.24	1.05073	0.00932349	2.03042	3056.1	2563.43	2424.63	1.05142	0.00802111	2.09577
si:ch73-141c7.1	ENSDARG00000009040	393762	Both	481.578	424.497	316.194	1.23631	0.0305401	1.51513	473.357	427.239	308.896	1.26235	0.0278025	1.55592
si:ch73-147o17.1	ENSDARG00000097236	100006207	Both	749.983	634.188	503.126	1.4263	0.000447684	3.34903	732.692	635.748	501.956	1.41903	0.000454936	3.34205
si:ch73-217n20.1	ENSDARG00000091584	100329788	Both	98.8349	49.0985	178.978	2.40763	0.000955862	3.0196	508.064	351.603	680.165	2.46385	9.0886e-07	6.0415
si:ch73-237c6.1	ENSDARG00000078114	100149189	Both	894.359	1205.98	1283.67	1.29655	0.00688198	2.16229	968.888	1307.27	1319.74	1.30466	0.00540459	2.26724
si:ch73-248e21.1	ENSDARG00000090625	557006	Both	305.226	302.774	256.535	1.19292	0.0368168	1.43395	301.753	304.586	254.443	1.19009	0.037445	1.42661
si:ch73-27e22.1	ENSDARG00000111423	100005161	Ens95only	138.563	205.6	96.4491	1.26057	0.0324528	1.48875	37.5987	58.2598	34.6518	0.911876	0.311572	0.506442
si:ch73-281i18.4	ENSDARG00000102533	100318116	Both	224.801	409.154	340.058	1.28472	0.00774305	2.11109	613.147	752.267	562.349	1.26972	0.00911298	2.04034
si:ch73-281i18.6	ENSDARG00000101490	100330842	Ens95only	38.7588	82.8536	85.5115	1.63835	0.0470425	1.32751	83.8739	94.0334	119.796	1.17468	0.0557067	1.25409
si:ch73-281i18.7	ENSDARG00000103395	100535123	Ens95only	50.3864	122.746	111.364	1.73425	0.0113355	1.94556	96.4068	153.315	152.468	1.05623	0.0941338	1.02625
si:ch73-334d15.4	ENSDARG00000056502	796217	Both	21.3173	137.067	135.228	2.08395	0.0109274	1.96148	44.3471	180.912	177.219	1.8719	0.00706225	2.15106
si:ch73-352p4.8	ENSDARG00000040610	568699	Both	535.84	1301.11	965.485	2.3559	4.43098e-07	6.3535	402.016	655.168	681.155	2.1192	6.90548e-06	5.16081
si:ch73-375g18.1	ENSDARG00000075024	562945	Ens95only	1247.06	1227.46	1104.69	1.24445	0.00188932	2.72369	25.0658	5.11051	18.811	-0.177543	0.928642	0.0321516
si:ch73-380l3.2	ENSDARG00000075697	100003913	Both	169.57	297.659	317.188	1.31714	0.0179953	1.74484	148.466	284.144	299.985	1.37331	0.0150915	1.82127
si:ch73-380l3.4	ENSDARG00000096863	101885005	Both	83.3314	104.334	62.6422	1.94086	0.00294743	2.53056	63.6285	71.5472	46.5324	2.07063	0.0037499	2.42598
si:ch73-52p7.1	ENSDARG00000095184	100321084	RefSeqOnly	0.96897	55.2358	73.5797	2.03958	0.132481	0.877848	50.1315	110.387	155.438	2.2275	0.00179364	2.74627
si:ch73-86n18.1	ENSDARG00000056379	564061	Both	1196.68	2988.87	1547.16	3.25416	2.38463e-09	8.62258	1033.48	2934.46	1509.83	3.26902	3.21963e-09	8.49219
si:dkey-100n23.5	ENSDARG00000086911	793886	RefSeqOnly	308.132	552.358	432.529	0.790288	0.106511	0.972605	734.62	1380.86	1121.73	1.1443	0.0075338	2.12299
si:dkey-104n9.1	ENSDARG00000093042	560366	Both	177.322	23.5263	22.8694	2.43577	0.0147119	1.83233	279.58	33.7294	24.7513	2.43519	0.0165303	1.78172
si:dkey-118j18.2	ENSDARG00000096457	100331646	Both	1913.72	2388.44	2186.51	1.15118	0.00123648	2.90781	1866.44	2389.68	2162.27	1.18087	0.000866216	3.06237
si:dkey-12l12.1	ENSDARG00000094422	566480	Both	1769.34	2354.68	2182.53	1.59047	0.000243725	3.6131	1736.29	2359.01	2161.28	1.60163	0.000211612	3.67446
si:dkey-147f3.4	ENSDARG00000071029	553461	RefSeqOnly	46.5106	83.8765	179.972	0.809433	0.416086	0.380817	236.197	675.61	443.543	1.19776	0.0271873	1.56563
si:dkey-147f3.8	ENSDARG00000092166	553461	Both	278.094	620.891	280.398	1.27374	0.0154406	1.81134	236.197	675.61	443.543	1.19776	0.0271873	1.56563
si:dkey-163m14.2	ENSDARG00000059507	799082	RefSeqOnly	12.5966	4.09154	15.9091	-0.122643	0.954592	0.0201821	2924.98	2546.06	2196.92	3.04152	2.1534e-11	10.6669
si:dkey-164f24.2	ENSDARG00000089418	566607	Both	968.97	1531.26	1241.91	1.20136	0.00970665	2.01293	956.356	1545.42	1231.62	1.20016	0.00995128	2.00212
si:dkey-169i5.4	ENSDARG00000077862	796658	RefSeqOnly	13.5656	25.5721	27.841	0.564623	0.711535	0.147804	147.502	118.564	68.3135	1.50042	0.0234935	1.62905
si:dkey-16l2.20	ENSDARG00000098191	100000168	Both	537.778	1502.62	695.03	1.43989	0.00908706	2.04158	532.166	1510.67	693.035	1.45015	0.00860515	2.06524
si:dkey-172m14.1	ENSDARG00000052693	567451	Ens95only	191.856	309.934	189.915	1.00775	0.0452586	1.3443	226.556	400.664	221.771	0.96486	0.061964	1.20786
si:dkey-177p2.6	ENSDARG00000042322	568712	Both	5380.69	3817.4	7058.68	1.47883	0.0022805	2.64197	2315.69	1663.98	3072.13	1.22885	0.0196711	1.70617
si:dkey-178o16.4	ENSDARG00000076797	100534787	Both	40.6967	155.478	90.4831	2.37123	0.00135335	2.86859	71.341	240.194	114.846	2.4725	0.000192632	3.71527
si:dkey-17m8.1	ENSDARG00000079530	796618	Both	189.918	180.028	173.012	1.19129	0.0179656	1.74556	339.352	749.201	508.886	1.22082	0.0124967	1.9032
si:dkey-183i3.5	ENSDARG00000056248	566445	Both	1305.2	721.134	426.563	2.70321	0.000162771	3.78842	1287.99	727.737	426.712	2.69396	0.000149541	3.82524
si:dkey-188i13.11	ENSDARG00000092895	100004663	Both	511.616	245.492	198.864	1.23231	0.0417077	1.37978	505.172	247.349	198.01	1.25513	0.0368273	1.43383
si:dkey-190l8.2	ENSDARG00000091222	566640	RefSeqOnly	149.221	135.021	112.358	0.808771	0.1712	0.766497	85.8021	99.1439	74.2538	1.62314	0.0144717	1.83948
si:dkey-192l18.9	ENSDARG00000077878	100005961	Both	34.8829	56.2586	58.6649	1.92825	0.0167931	1.77487	234.269	290.277	288.105	2.1881	6.50672e-07	6.18664
si:dkey-199f5.8	ENSDARG00000018853	556544	Both	1467.99	1845.28	1546.17	1.07684	0.00612514	2.21288	1448.99	1854.09	1539.53	1.08291	0.00551435	2.25851
si:dkey-19b23.8	ENSDARG00000103211	569132	Both	1730.58	1498.53	1123.58	1.92281	5.46869e-05	4.26212	1708.33	1505.56	1119.75	1.92913	4.71987e-05	4.32607
si:dkey-220o5.5	ENSDARG00000099211	101885767	Both	21.3173	6.13731	46.7331	3.46763	0.00865271	2.06285	47.2393	38.8399	114.846	2.62699	0.00272704	2.56431
si:dkey-222f8.3	ENSDARG00000058366	561722	Both	410.843	962.534	679.121	1.15845	0.0167125	1.77696	405.873	966.909	674.224	1.17625	0.0154428	1.81127
si:dkey-228a15.1	ENSDARG00000095698	564472	Both	93.0211	75.6935	41.7615	1.89384	0.0131037	1.8826	93.5146	82.7903	45.5423	1.89748	0.0108651	1.96397
si:dkey-22o12.2	ENSDARG00000091513	100000151	Both	398.247	1155.86	652.274	1.54067	0.0029179	2.53493	393.34	1162.13	652.443	1.54405	0.00300194	2.5226
si:dkey-235d18.5	ENSDARG00000039652	100034409	Ens95only	108.525	151.387	177.983	1.26144	0.0493826	1.30643	13.497	14.3094	16.8309	1.00607	0.517496	0.286093
si:dkey-238c7.16	ENSDARG00000069537	559078	Both	85.2694	374.376	442.473	4.17274	5.33679e-09	8.27272	177.389	838.124	1049.45	4.47818	1.02141e-10	9.9908
si:dkey-238i5.2	ENSDARG00000101613	321155	Both	162.787	605.548	410.654	1.22573	0.0403557	1.39409	160.999	597.93	394.04	1.21711	0.0424829	1.37179
si:dkey-23i12.5	ENSDARG00000103682	325112	Both	3096.83	2026.33	2254.12	1.06321	0.0329557	1.48207	2855.57	1736.55	2016.73	1.09461	0.0340001	1.46852
si:dkey-23n7.10	ENSDARG00000104129	100333689	Both	90.1142	126.838	38.7785	1.76426	0.0181169	1.74192	89.6583	124.696	37.6219	1.68802	0.0252769	1.59728
si:dkey-240h12.4	ENSDARG00000034210	555536	Both	82.3624	105.357	101.421	1.54514	0.0071018	2.14863	104.119	125.719	118.806	1.4501	0.0111539	1.95257
si:dkey-247m21.3	ENSDARG00000001906	559089	Both	280.032	403.016	286.364	2.56752	2.1788e-07	6.66178	244.873	374.089	256.423	2.95539	1.38189e-08	7.85953
si:dkey-25e12.3	ENSDARG00000055365	678527	Both	457.354	288.453	145.171	1.76108	0.00456074	2.34096	428.046	257.57	126.726	1.73281	0.00718597	2.14351
si:dkey-261h17.1	ENSDARG00000095268	561010	Both	640.489	3070.7	1798.73	2.32274	4.18058e-05	4.37876	7438.75	25926.6	13721.1	2.41987	1.8958e-06	5.72221
si:dkey-264d12.4	ENSDARG00000036428	796607	Both	597.854	338.575	337.075	2.40112	3.66276e-05	4.43619	572.656	339.338	325.727	2.5017	2.82076e-05	4.54963
si:dkey-264d12.5	ENSDARG00000086851	796535	Both	844.942	1050.5	681.109	2.13463	1.02753e-07	6.98821	832.955	1055.83	682.145	2.1391	1.02205e-07	6.99053
si:dkey-266m15.6	ENSDARG00000078508	569039	RefSeqOnly	104.649	92.0596	105.398	0.774814	0.276701	0.557989	143.646	140.028	146.527	1.41925	0.0137988	1.86016
si:dkey-271j15.3	ENSDARG00000091627	101886426	Ens95only	65.89	105.357	135.228	1.82449	0.0176983	1.75207	96.4068	118.564	126.726	1.28223	0.263381	0.579415
si:dkey-276j7.2	ENSDARG00000097743	792667	Both	118.214	140.135	143.182	2.7109	7.61896e-05	4.1181	87.7302	113.453	117.816	2.70457	0.000192632	3.71527
si:dkey-29d8.3	ENSDARG00000091879	556220	Both	44.5726	129.906	103.409	1.52426	0.0381355	1.41867	39.5268	128.785	100.985	1.57693	0.0424079	1.37255
si:dkey-30e9.7	ENSDARG00000101697	100006681	RefSeqOnly	131.78	252.652	251.563	1.13046	0.0614942	1.21117	127.257	254.503	250.483	1.18949	0.0475361	1.32298
si:dkey-31g6.6	ENSDARG00000101393	100535653	Both	229.646	133.998	123.296	2.47124	1.65428e-05	4.78139	231.376	135.94	122.766	2.46135	1.98829e-05	4.70152
si:dkey-34d22.1	ENSDARG00000103181	100535421	Both	752.89	803.987	486.223	1.10252	0.0205796	1.68656	662.315	756.356	424.732	1.09858	0.027109	1.56689
si:dkey-40c11.2	ENSDARG00000032482	798260	Both	219.956	166.73	199.858	1.56337	0.000955494	3.01977	1529.98	1868.4	1233.6	2.15292	6.2276e-09	8.20568
si:dkey-42i9.6	ENSDARG00000013681	558619	Both	2591.03	3835.82	3248.44	1.456	9.22702e-05	4.03494	2542.25	3828.8	3223.6	1.47121	7.03478e-05	4.15275
si:dkey-44g17.6	ENSDARG00000098123	100331581	RefSeqOnly	13.5656	9.20596	6.96024	0.881744	0.66655	0.176167	254.514	353.647	172.269	1.86626	0.000201769	3.69515
si:dkey-49n23.1	ENSDARG00000040920	558742	Both	337.202	352.895	352.984	1.49204	0.000268681	3.57076	254.514	196.244	139.597	1.31952	0.011455	1.94101
si:dkey-52l18.4	ENSDARG00000075092	560708	Ens95only	289.722	406.085	264.489	1.55142	0.0030411	2.51697	357.669	475.278	315.826	0.74222	0.251657	0.59919
si:dkey-54n8.2	ENSDARG00000087793	100002736	Both	518.399	981.969	811.365	1.08035	0.0285924	1.54375	524.453	1037.43	833.623	1.06197	0.0309996	1.50864
si:dkey-58f10.7	ENSDARG00000091972	564114	Both	73.6417	126.838	95.4548	2.09558	0.000601014	3.22112	91.5865	140.028	104.945	2.19799	0.000280303	3.55237
si:dkey-65j6.2	ENSDARG00000103586	100148904	Both	188.949	126.838	270.455	1.98233	0.000286698	3.54258	155.215	123.674	257.413	2.66744	3.09002e-05	4.51004
si:dkey-6n21.12	ENSDARG00000105575	100003436	Both	677.31	1120.06	757.672	1.39516	0.00140755	2.85154	669.063	1126.36	754.418	1.39826	0.00139931	2.85409
si:dkey-6n6.1	ENSDARG00000062487	100170811	Both	647.272	1220.3	940.627	4.02063	5.2395e-20	19.2807	639.177	1226.52	936.588	4.02129	6.72561e-20	19.1723
si:dkey-78a14.4	ENSDARG00000036066	794381	Both	102.711	105.357	131.25	1.59644	0.00272731	2.56427	135.934	120.608	146.527	1.59265	0.00199663	2.6997
si:dkey-79d12.5	ENSDARG00000040284	100538016	Both	2894.31	2908.06	2795.03	1.63311	0.0393673	1.40486	3390.63	3211.45	3029.55	1.66272	0.0337228	1.47208
si:dkey-7j14.6	ENSDARG00000090552	556585	Both	5264.41	5385.49	4098.59	1.78682	5.72419e-06	5.24229	5180.9	5402.83	4065.15	1.79133	4.64108e-06	5.33338
si:dkey-85n7.8	ENSDARG00000095793	100330915	Both	453.478	29.6636	179.972	3.30127	9.97746e-05	4.00098	418.406	23.5084	145.537	3.47003	0.000150443	3.82263
si:dkey-91m11.5	ENSDARG00000042329	560226	Both	137.594	91.0367	112.358	1.39202	0.0277232	1.55716	2208.68	1044.59	1061.33	1.79248	5.09589e-05	4.29278
si:dkey-93h22.8	ENSDARG00000098666	110440113	RefSeqOnly	238.367	237.309	355.967	0.793356	0.189575	0.722219	241.981	206.465	273.254	1.2814	0.0086664	2.06216
si:dkey-9i23.15	ENSDARG00000093997	555790	Both	483.516	599.41	466.336	1.30508	0.00161513	2.79179	477.214	602.018	464.334	1.31511	0.0015213	2.81778
si:dkey-9i23.16	ENSDARG00000093954	571915	Both	71.7038	283.339	135.228	2.23696	0.00103491	2.9851	71.341	284.144	134.647	2.25782	0.00109738	2.95964
si:dkeyp-106c3.1	ENSDARG00000090623	558820	Both	1412.76	3538.16	2455.97	3.71973	2.97355e-08	7.52672	1471.17	3687.74	2571.16	3.57249	4.71623e-08	7.3264
si:dkeyp-110e4.6	ENSDARG00000061845	558442	RefSeqOnly	332.357	584.067	428.552	0.994225	0.0379631	1.42064	321.035	565.223	401.96	1.1081	0.0191536	1.71775
si:dkeyp-23e4.3	ENSDARG00000074819	566257	Both	342.046	560.541	417.615	2.0132	1.11771e-05	4.95167	363.454	643.924	467.304	2.06585	1.29082e-05	4.88913
si:dkeyp-44a8.4	ENSDARG00000095339	567373	Both	760.641	1587.52	892.9	1.83136	6.15631e-05	4.21068	565.908	1161.11	692.045	1.88024	5.54821e-05	4.25585
si:dkeyp-82a1.1	ENSDARG00000093386	101886381	RefSeqOnly	147.283	16.3662	48.7217	0.56499	0.662567	0.17877	64.5926	21.4641	37.6219	2.15362	0.0419914	1.37684
si:rp71-36a1.2	ENSDARG00000093686	100034566	Both	138.563	578.953	346.023	2.26205	0.000140495	3.85234	173.532	636.77	381.169	2.15412	0.000134448	3.87145
si:rp71-36a1.3	ENSDARG00000071662	100034563	RefSeqOnly	5.81382	0	18.8921	0.698512	0.810948	0.0910071	184.137	226.907	182.169	1.02523	0.0372862	1.42845
si:zfos-2326c3.2	ENSDARG00000098680	561669	Both	1185.05	1268.38	897.871	1.68058	5.70992e-06	5.24337	1065.3	1159.06	849.463	1.64651	8.15071e-06	5.0888
si:zfos-905g2.1	ENSDARG00000093496	100003955	Both	234.491	285.385	189.915	1.0639	0.0336273	1.47331	232.34	288.233	189.1	1.04733	0.0396468	1.40179
sik1	ENSDARG00000058606	553465	Both	3642.36	8220.92	5610.95	1.7287	0.00361569	2.44181	3564.16	8254.5	5578.93	1.73978	0.00347277	2.45932
sik2b	ENSDARG00000062315	567919	Both	5793.47	5988.99	5216.2	1.6602	1.4907e-05	4.82661	5651.37	5954.77	5099.75	1.69144	8.53026e-06	5.06904
sil1	ENSDARG00000100564	568308	Both	174.415	276.179	203.836	1.17206	0.0138192	1.85952	172.568	276.99	202.96	1.19203	0.0136027	1.86638
sirt1	ENSDARG00000068064	797132	Both	1226.72	1415.67	1219.04	1.02779	0.013244	1.87798	1155.92	1349.17	1125.69	1.09773	0.00721716	2.14163
sirt2	ENSDARG00000011488	322309	Both	632.737	1091.42	642.331	1.33161	0.0016084	2.79361	624.716	1097.74	639.573	1.34232	0.00152492	2.81675
six1a	ENSDARG00000039304	494168	Both	1107.53	1044.37	928.695	1.62955	5.64815e-05	4.24809	1279.32	1225.5	1108.86	1.61442	3.82959e-05	4.41685
six2a	ENSDARG00000058004	83415	Both	723.821	1080.17	813.354	1.48722	0.000201847	3.69498	714.374	1085.47	809.861	1.49531	0.000192012	3.71667
skia	ENSDARG00000042151	30101	Both	2850.71	4169.28	2853.7	1.22383	0.00103512	2.98501	2814.11	4190.62	2841.44	1.23221	0.000920058	3.03618
skilb	ENSDARG00000022904	100170835	RefSeqOnly	327.512	212.76	225.711	1.29818	0.0620807	1.20704	900.44	880.03	722.737	1.38788	0.0146725	1.83349
slc10a7	ENSDARG00000104508	445025	Both	829.438	377.444	496.166	1.84339	0.00031041	3.50806	818.494	379.2	494.035	1.84491	0.000287826	3.54087
slc12a2	ENSDARG00000104573	415170	Both	5981.45	10568.4	9820.9	2.12157	1.02528e-07	6.98916	5902.99	10618.6	9776.75	2.13105	8.47217e-08	7.07201
slc12a4	ENSDARG00000014378	562826	Both	987.38	1184.5	666.195	1.59526	0.000117911	3.92845	879.23	1129.42	610.861	1.60333	0.000128895	3.88976
slc13a2	ENSDARG00000053853	406537	Both	305.226	605.548	400.711	3.04629	8.00662e-07	6.09655	301.753	608.151	398.99	3.04897	8.38223e-07	6.07664
slc13a4	ENSDARG00000059053	100038771	Both	553.282	539.06	765.627	3.25501	2.26429e-08	7.64507	546.627	544.781	762.339	3.26266	2.36612e-08	7.62596
slc13a5a	ENSDARG00000077691	503788	Both	481.578	542.129	623.439	1.77543	7.89028e-05	4.10291	475.286	544.781	620.762	1.78941	7.72899e-05	4.11188
slc15a2	ENSDARG00000032010	556684	Both	150.19	399.948	417.615	1.49305	0.00649433	2.18747	148.466	402.708	415.821	1.50759	0.00633954	2.19794
slc16a10	ENSDARG00000020984	566499	Both	2642.38	2215.57	2256.11	1.80487	2.14475e-05	4.66862	2628.05	2326.3	2359.29	1.81701	1.10114e-05	4.95816
slc16a1b	ENSDARG00000068572	368274	Both	193.794	133.998	139.205	1.34699	0.0401562	1.39625	191.85	134.917	138.607	1.36031	0.0389616	1.40936
slc16a4	ENSDARG00000042807	567144	RefSeqOnly	170.539	216.852	255.54	0.995829	0.0430835	1.36569	288.256	358.758	410.871	1.14238	0.00985282	2.00644
slc16a5a	ENSDARG00000030472	565514	Both	209.298	180.028	206.819	1.48959	0.002893	2.53865	210.167	194.199	202.96	1.41122	0.00445847	2.35081
slc16a5b	ENSDARG00000102668	794371	RefSeqOnly	72.6727	51.1442	50.7103	1.37568	0.0561376	1.25075	120.509	74.6135	63.3632	1.81862	0.00462665	2.33473
slc16a6a	ENSDARG00000102793	564872	Both	472.857	1232.58	1093.75	2.06987	3.15434e-05	4.50109	46.2753	258.592	229.692	2.5515	0.000840056	3.07569
SLC16A6oneOfMany	ENSDARG00000104629	103911912	Both	78.4866	118.655	86.5059	2.5922	4.90682e-05	4.3092	107.976	137.984	116.826	2.16062	7.22507e-05	4.14116
slc16a9a	ENSDARG00000013926	795588	Both	682.155	726.248	613.496	2.01741	2.0248e-05	4.69362	673.884	731.825	607.891	2.00028	1.16864e-05	4.93232
slc1a3a	ENSDARG00000104431	323439	Both	1592.99	1646.84	1554.12	1.24666	0.0108009	1.96654	1572.4	1655.81	1548.44	1.2531	0.00996018	2.00173
slc1a5	ENSDARG00000099186	100002129	Ens95only	3688.87	4865.86	3313.08	2.11085	2.40234e-08	7.61937	28.922	32.7073	30.6916	0.942161	0.451445	0.345396
slc20a1b	ENSDARG00000010641	321541	Both	13681.9	12209.1	11223.9	1.67395	3.2885e-05	4.483	13293.5	12171.2	11070.7	1.6793	2.38838e-05	4.6219
slc20a2	ENSDARG00000060796	558346	Both	4566.76	5640.18	4944.75	1.75668	2.51231e-06	5.59993	4578.36	5731.95	4954.21	1.76747	1.83092e-06	5.73733
slc22a18	ENSDARG00000052271	559752	Both	689.907	989.129	614.49	1.23847	0.00880278	2.05538	681.596	983.262	608.881	1.24243	0.00850875	2.07013
slc22a2	ENSDARG00000030530	406424	Both	553.282	722.156	719.888	2.24947	1.90013e-05	4.72122	546.627	725.693	716.797	2.25166	2.02093e-05	4.69445
slc22a31	ENSDARG00000078882	570565	Both	483.516	476.664	453.41	1.61031	0.000135594	3.86776	476.25	512.073	466.314	1.60845	0.00015357	3.81369
slc22a7b.1	ENSDARG00000056643	393320	Both	190.887	406.085	321.165	3.19026	2.34362e-08	7.63011	476.25	1156	953.419	3.06752	3.12266e-06	5.50548
SLC22A7oneOfMany	ENSDARG00000056652	393320	Both	181.197	582.021	512.075	3.15756	3.82551e-05	4.41731	476.25	1156	953.419	3.06752	3.12266e-06	5.50548
slc25a24	ENSDARG00000008568	447867	Both	498.051	947.191	803.411	1.1798	0.00949544	2.02248	497.459	950.555	795.011	1.18181	0.00920835	2.03582
slc25a25a	ENSDARG00000010572	406541	Both	2833.27	4204.06	2938.22	1.75867	0.0153828	1.81296	2708.07	4179.38	2891.94	1.76906	0.0151018	1.82097
slc25a32a	ENSDARG00000089791	393226	Both	2221.85	2520.39	1548.16	1.71899	9.01979e-06	5.0448	2197.11	2540.95	1544.48	1.71371	8.40348e-06	5.07554
slc25a43	ENSDARG00000102048	796731	Both	1029.05	1480.11	1389.07	1.64662	1.47008e-05	4.83266	1016.13	1487.16	1383.1	1.65344	1.30471e-05	4.88448
slc25a48	ENSDARG00000021250	436640	Both	486.423	2417.08	1251.85	1.56899	0.0105942	1.97493	495.531	2509.26	1270.23	1.60744	0.00878026	2.05649
slc26a10	ENSDARG00000078800	100150270	RefSeqOnly	14.5345	40.9154	51.7047	1.7203	0.0923346	1.03464	101.227	156.382	193.06	1.948	0.000300957	3.5215
slc26a2	ENSDARG00000011618	557046	Both	847.849	732.385	803.411	1.66715	9.67921e-05	4.01416	176.424	82.7903	125.736	1.27959	0.0391812	1.40692
slc26a5	ENSDARG00000022424	322846	Both	775.176	549.289	746.735	1.57145	4.26603e-05	4.36998	765.47	547.847	743.528	1.58298	3.63209e-05	4.43984
slc29a1a	ENSDARG00000101289	563580	Both	4711.13	4616.28	3004.84	2.21794	3.62864e-08	7.44026	4624.63	4628.08	2984.01	2.24134	2.3648e-08	7.62621
slc2a10	ENSDARG00000090820	560546	Both	319.76	403.016	284.376	1.69006	0.000833385	3.07915	317.178	395.554	284.144	1.72947	0.000691293	3.16034
slc2a12	ENSDARG00000036865	393510	Both	464.137	566.678	534.944	1.385	0.00125739	2.90053	458.896	569.311	532.647	1.38778	0.00128296	2.89179
slc2a1b	ENSDARG00000007412	100321338	RefSeqOnly	51.3554	86.9452	73.5797	0.991101	0.362554	0.440627	968.888	1291.94	854.414	1.07027	0.0117213	1.93102
slc30a4	ENSDARG00000007180	393616	Both	254.839	262.881	271.449	1.03777	0.0235444	1.62811	255.478	264.724	274.244	1.04299	0.0240313	1.61922
slc35a2	ENSDARG00000058990	555288	RefSeqOnly	17.4415	82.8536	48.7217	0.987005	0.365454	0.437167	181.245	495.72	353.448	1.57891	0.00682502	2.1659
slc35a3b	ENSDARG00000020981	550599	Both	72.6727	39.8925	77.557	1.87186	0.00942899	2.02553	82.9099	50.083	86.1344	1.72202	0.0107208	1.96977
slc35c2	ENSDARG00000037517	101884357	Both	967.032	1294.97	1136.51	1.1807	0.00283058	2.54813	852.236	1085.47	956.389	1.39056	0.000659531	3.18076
slc35d1a	ENSDARG00000011973	445400	Both	945.715	1097.56	1050	1.85427	1.04072e-07	6.98267	16.3892	148.205	155.438	2.63366	0.00621008	2.2069
slc35d1b	ENSDARG00000027986	393447	Both	199.608	266.973	249.574	1.01558	0.0489028	1.31067	197.634	273.923	248.503	1.03532	0.0457546	1.33957
slc35f2	ENSDARG00000069745	555929	Both	370.147	251.63	391.762	1.05601	0.0222905	1.65188	365.382	252.459	390.08	1.06041	0.0215766	1.66602
slc38a10	ENSDARG00000077081	561739	Both	1109.47	1767.54	1337.36	1.26305	0.00130763	2.88352	1100.97	1783.57	1333.6	1.27517	0.00116622	2.93322
slc38a2	ENSDARG00000045886	566537	Both	4877.79	8368.22	7768.62	1.54146	0.00031983	3.49508	4778.89	8275.96	7626.36	1.5652	0.000224747	3.64831
slc38a4	ENSDARG00000018149	449771	Both	2137.55	5195.23	2916.34	1.58673	0.0013491	2.86996	2105.52	5220.9	2904.81	1.597	0.00123522	2.90826
slc38a5b	ENSDARG00000014587	436921	Both	7341.89	6413.49	6614.22	1.60499	6.32187e-05	4.19915	3549.7	3943.27	3963.17	1.57346	3.09002e-05	4.51004
slc38a6	ENSDARG00000054312	336741	Both	415.688	617.822	566.763	1.63304	4.81388e-05	4.3175	490.711	670.499	606.901	1.63928	1.98829e-05	4.70152
slc39a13	ENSDARG00000000442	368686	Both	1113.35	1465.79	1065.91	1.65759	1.89622e-05	4.72211	550.483	643.924	472.254	1.67998	8.49107e-05	4.07104
slc39a3	ENSDARG00000101434	792986	RefSeqOnly	25.1932	9.20596	14.9148	2.2335	0.157077	0.803887	1017.09	908.649	580.17	2.03662	5.07668e-05	4.29442
slc3a2b	ENSDARG00000037012	399488	Both	6108.39	6098.44	7212.8	1.22518	0.00101822	2.99216	12702.6	10483.7	11675.7	1.23549	0.00155563	2.80809
slc41a2b	ENSDARG00000073881	566242	RefSeqOnly	92.0521	297.659	215.768	1.17254	0.078308	1.10619	231.376	671.521	479.184	1.21341	0.0230562	1.63721
slc43a1a	ENSDARG00000037393	334395	Both	866.259	1717.42	1699.29	1.00561	0.0472868	1.32526	855.128	1726.33	1692	1.0143	0.0448855	1.34789
slc43a1b	ENSDARG00000037748	100009631	Both	849.787	247.538	424.575	1.58398	0.0138982	1.85704	838.739	248.371	422.752	1.58572	0.0138863	1.85741
slc43a3b	ENSDARG00000057949	556206	Both	4814.81	6019.68	4020.04	4.39951	4.8982e-28	27.31	4748.04	6045.73	4002.77	4.41335	2.63044e-28	27.58
slc44a5b	ENSDARG00000057419	558142	RefSeqOnly	73.6417	34.7781	49.716	0.461475	0.703078	0.152996	1188.7	1214.26	991.041	1.55724	9.57961e-06	5.01865
slc47a1	ENSDARG00000046012	541497	Both	253.87	750.797	367.899	1.52495	0.0180798	1.74281	211.131	685.831	330.677	1.91861	0.00393039	2.40556
slc47a2.1	ENSDARG00000060051	560024	Both	337.202	613.731	719.888	3.87138	1.43212e-10	9.84402	333.568	616.328	713.826	3.91093	2.42777e-10	9.61479
slc47a4	ENSDARG00000079340	555258	RefSeqOnly	32.945	58.3044	17.8978	1.40265	0.14847	0.82836	26.0298	42.9283	14.8508	2.4458	0.0267467	1.57273
slc48a1b	ENSDARG00000026109	792763	Both	380.805	595.319	547.87	1.0622	0.0154382	1.8114	375.022	586.687	537.597	1.06492	0.0159601	1.79696
slc4a7	ENSDARG00000073952	568872	Both	385.65	256.744	321.165	1.75663	0.00150753	2.82174	2061.18	1673.18	1781.1	2.08049	1.70937e-07	6.76716
slc51a	ENSDARG00000045306	447807	Both	595.917	1165.07	941.621	1.44485	0.00814227	2.08925	574.585	1166.22	936.588	1.46475	0.00795581	2.09932
slc6a11a	ENSDARG00000074002	558960	Both	108.525	256.744	123.296	1.89924	0.00194512	2.71105	107.976	258.592	122.766	1.90798	0.00210607	2.67653
SLC6A13	ENSDARG00000067567	100332592	Both	1091.06	634.188	1472.59	1.28738	0.0353272	1.45189	1668.8	866.743	2038.51	1.28328	0.0486342	1.31306
slc6a2	ENSDARG00000016141	565776	Ens95only	392.433	703.745	336.08	1.8592	9.87317e-05	4.00554	36.6346	40.8841	26.7314	0.663371	0.54475	0.263803
slc6a22.1	ENSDARG00000000730	368923	Both	613.358	2408.89	1140.49	2.47452	6.27098e-06	5.20266	605.435	2431.58	1150.44	2.4697	7.03223e-06	5.15291
slc6a4a	ENSDARG00000061165	664719	Both	64.921	41.9383	65.6251	1.4227	0.0448171	1.34856	120.509	145.139	112.866	1.5667	0.00366201	2.43628
slc7a1	ENSDARG00000016439	559627	Both	153.097	374.376	310.228	1.4314	0.0108585	1.96423	2125.77	1240.83	1259.34	1.82688	5.81954e-05	4.23511
slc7a2	ENSDARG00000037097	494041	Both	2305.18	5995.13	2805.97	3.36592	3.88458e-08	7.41066	788.608	3519.1	1721.7	3.88325	8.45924e-11	10.0727
slc7a3a	ENSDARG00000020645	492363	Both	3334.23	6127.08	4998.45	1.50942	0.00050908	3.29321	3291.33	6158.17	4975.99	1.51814	0.000458518	3.33864
slc7a5	ENSDARG00000099265	797250	RefSeqOnly	57.1692	75.6935	84.5172	1.18973	0.131982	0.879486	511.92	743.068	438.592	1.33754	0.00422598	2.37407
slc7a8a	ENSDARG00000075831	100007704	Both	12742	12433.2	10266.4	2.38743	5.52128e-11	10.258	13268.5	12453.3	10391.6	2.32239	8.96731e-10	9.04734
slco2b1	ENSDARG00000054609	792084	Both	1326.52	3047.17	1577.99	1.6289	0.000532725	3.2735	1217.62	2972.27	1508.84	1.74481	0.000190197	3.7208
slit3	ENSDARG00000034268	80354	Both	4900.08	7159.17	5800.86	1.53592	0.000145414	3.83739	4829.98	7194.58	5770.01	1.54755	0.000123379	3.90876
smad1	ENSDARG00000027199	30628	Both	992.225	1046.41	864.064	1.05862	0.00498084	2.3027	970.817	1045.61	856.394	1.09007	0.00352558	2.45277
smad3a	ENSDARG00000036096	58092	Both	2033.87	2180.79	1736.08	1.11269	0.00528167	2.27723	507.1	513.095	482.155	1.17409	0.0466949	1.33073
smad6a	ENSDARG00000053209	116992	Both	379.836	636.234	480.257	1.05546	0.0181987	1.73996	375.022	639.836	477.204	1.06824	0.0176693	1.75278
smad6b	ENSDARG00000031763	564395	Both	428.285	1200.87	849.15	1.53993	0.0025204	2.59853	1143.38	2145.39	1444.48	1.6156	6.8285e-05	4.16567
smad7	ENSDARG00000016858	326282	Both	1515.47	1528.19	1282.67	1.30947	0.000396314	3.40196	1471.17	1500.45	1259.34	1.36019	0.00023703	3.6252
smarca1	ENSDARG00000012776	559803	Both	523.244	649.532	679.121	1.26251	0.00170804	2.7675	515.776	639.836	683.135	1.31787	0.00116804	2.93254
smarca2	ENSDARG00000008904	334032	Both	1200.55	1410.56	1369.18	1.05901	0.0219183	1.65919	1184.84	1422.77	1356.37	1.07071	0.0191929	1.71686
smarcd2	ENSDARG00000088877	564317	Both	260.653	654.646	305.256	1.19938	0.0349118	1.45703	262.227	658.234	304.936	1.19884	0.0341943	1.46605
smco4	ENSDARG00000097824	100333736	Both	832.345	760.003	1122.59	1.30815	0.0324435	1.48887	829.099	773.731	1128.66	1.31886	0.0297384	1.52668
smim14	ENSDARG00000005799	402894	Both	179.259	351.872	224.716	1.63861	0.000694318	3.15844	176.424	353.647	223.751	1.69444	0.000561539	3.25062
smoc1	ENSDARG00000088255	100529120	Both	153.097	213.783	158.097	1.36042	0.0106997	1.97063	272.831	326.051	238.602	1.35663	0.00537278	2.2698
smox	ENSDARG00000036967	387290	Both	2425.33	5366.05	2494.75	1.20906	0.0205031	1.68818	2253.03	5218.85	2358.3	1.30099	0.0119367	1.92312
snai1a	ENSDARG00000056995	30273	Both	1295.51	1250.99	1046.02	2.44957	5.74866e-07	6.24043	1278.35	1257.19	1041.53	2.45733	5.00355e-07	6.30072
snai1b	ENSDARG00000046019	792194	Both	493.206	410.177	400.711	2.26353	2.54253e-06	5.59473	487.818	412.929	397.01	2.29859	1.80942e-06	5.74246
snai2	ENSDARG00000040046	494038	Both	1895.31	1739.93	1527.28	1.79743	3.60968e-06	5.44253	1870.29	1748.82	1523.69	1.79739	3.101e-06	5.5085
snap23.1	ENSDARG00000012874	393159	RefSeqOnly	1092.03	1294.97	925.712	0.959338	0.0308285	1.51105	1072.04	1272.52	899.956	1.01395	0.0207481	1.68302
sned1	ENSDARG00000044433	100001751	Both	488.361	649.532	393.751	2.72064	5.99902e-11	10.2219	483.962	654.145	387.11	2.71561	9.78466e-11	10.0095
snorc	ENSDARG00000092383	561751	Both	8209.11	3576	4107.54	6.23712	5.50772e-34	33.259	8102.99	3603.93	4091.88	6.19858	1.25717e-34	33.9006
snrkb	ENSDARG00000017665	393806	RefSeqOnly	32.945	15.3433	39.7728	-0.0788458	0.957866	0.0186951	1220.51	1402.32	873.225	1.33045	0.00281129	2.5511
sntb2	ENSDARG00000051763	100331323	Both	1770.31	3051.26	2096.03	1.53757	7.41373e-05	4.12996	1746.89	3067.33	2087.03	1.54559	6.95767e-05	4.15754
snx17	ENSDARG00000091418	568263	Both	947.653	1263.26	1026.14	1.51699	3.11094e-05	4.50711	935.146	1270.47	1021.73	1.52062	2.99776e-05	4.5232
snx18a	ENSDARG00000067713	562372	Both	855.601	1836.08	1418.9	2.22582	2.02506e-06	5.69356	844.524	1845.92	1412.8	2.23618	1.84355e-06	5.73435
snx1a	ENSDARG00000071031	337386	RefSeqOnly	482.547	1985.42	1257.82	1.03484	0.0862126	1.06443	922.613	2704.48	1717.74	1.03785	0.0476119	1.32228
snx24	ENSDARG00000053527	619249	Both	76.5486	66.4875	54.6876	1.6596	0.012018	1.92017	75.1973	67.4587	43.5622	1.68384	0.0192265	1.7161
snx7	ENSDARG00000105185	431776	Both	438.943	595.319	461.365	1.11865	0.0123877	1.90701	374.058	577.488	439.582	1.14997	0.0124931	1.90333
snx9a	ENSDARG00000000837	368424	RefSeqOnly	31.976	75.6935	96.4491	1.35052	0.0834195	1.07873	275.723	376.134	370.279	1.51453	0.000291027	3.53607
snx9b	ENSDARG00000069302	558917	Both	1032.92	1280.65	992.332	1.48408	0.000190436	3.72025	965.996	1260.25	966.289	1.50212	0.000178839	3.74754
sobpb	ENSDARG00000017386	100006088	RefSeqOnly	138.563	51.1442	59.6592	1.44087	0.0544472	1.26402	1442.25	974.063	695.015	1.96545	4.05331e-06	5.39219
socs1a	ENSDARG00000038095	445073	Both	1903.06	1241.78	1532.25	2.35407	2.47074e-07	6.60717	1878	1246.96	1525.67	2.35886	2.0361e-07	6.6912
socs3a	ENSDARG00000025428	335409	Both	70455.7	61716.8	40275.9	2.91676	0.0303709	1.51754	69542.1	62033.4	40105	2.92343	0.0293986	1.53167
sort1a	ENSDARG00000029402	406511	Both	2237.35	3344.83	2303.84	1.90339	5.41788e-07	6.26617	2198.08	3357.61	2284.05	1.94838	3.4616e-07	6.46072
sost	ENSDARG00000061259	100000500	Both	3240.24	5767.02	4454.56	1.97615	1.34207e-05	4.87222	3198.78	5798.39	4436.42	1.98424	1.21282e-05	4.9162
sostdc1a	ENSDARG00000068892	550261	Both	1192.8	1041.3	763.638	1.20869	0.0276173	1.55882	1177.13	1048.68	760.359	1.2181	0.0258486	1.58756
soul5	ENSDARG00000075015	100000079	Both	3247.02	5186.02	4015.07	3.6168	5.24257e-07	6.28046	4740.32	6755.07	4959.16	3.58038	5.59187e-07	6.25244
sox6	ENSDARG00000015536	567154	Both	4344.86	3430.75	3162.93	1.45153	3.39369e-05	4.46933	922.613	492.653	398.99	1.37544	0.00479441	2.31926
sox9a	ENSDARG00000003293	60641	Both	1210.24	855.131	481.251	2.03555	2.1283e-05	4.67197	1185.8	859.588	479.184	2.04774	1.80828e-05	4.74273
sparc	ENSDARG00000019353	321357	Both	43008.7	65838	48145	2.0777	4.3792e-07	6.35861	42396.8	66127	47890.7	2.08759	3.56959e-07	6.44738
specc1la	ENSDARG00000006719	561775	Both	1343.96	2601.2	1744.04	2.01612	1.76561e-06	5.7531	1308.24	2592.05	1725.66	2.03531	1.1438e-06	5.94165
specc1lb	ENSDARG00000042232	555467	RefSeqOnly	17.4415	16.3662	24.858	-0.437649	0.749729	0.125096	488.783	702.184	418.791	1.40172	0.000978718	3.00934
spon1b	ENSDARG00000023694	58029	Both	4440.79	4174.39	3220.6	2.05481	5.65195e-08	7.2478	4382.65	4195.73	3206.77	2.05932	4.21782e-08	7.37491
spp1	ENSDARG00000044276	432385	Both	1676.32	649.532	2381.4	2.47021	0.000411817	3.3853	1654.34	653.123	2378.1	2.47602	0.000387411	3.41183
spred2b	ENSDARG00000008372	793290	Both	490.299	213.783	249.574	1.22539	0.0206716	1.68463	478.178	215.664	243.552	1.25545	0.0178681	1.74792
spry2	ENSDARG00000078308	335098	Both	1606.55	3717.16	2599.15	1.1864	0.00919505	2.03645	1589.75	3736.81	2588.98	1.19576	0.00848747	2.07122
spry4	ENSDARG00000068732	114437	Both	7752.73	7454.78	5320.61	1.81781	3.89692e-05	4.40928	7652.77	7493.03	5297.76	1.82392	3.17004e-05	4.49893
spryd3	ENSDARG00000101982	100005036	Both	261.622	231.172	132.245	1.11283	0.0356819	1.44755	319.107	258.592	153.458	1.11931	0.0310903	1.50738
sptbn1	ENSDARG00000102883	553451	RefSeqOnly	278.094	788.644	465.342	0.983505	0.119817	0.921481	11477.2	10902.8	8108.51	1.2112	0.00162924	2.78802
sqstm1	ENSDARG00000075014	406452	Both	2501.88	1639.68	1667.48	1.07885	0.0478375	1.32023	2464.16	1648.65	1660.31	1.08991	0.0431531	1.36499
sra1	ENSDARG00000053619	415137	Both	277.125	362.101	178.978	1.20219	0.018351	1.73634	284.4	388.399	195.04	1.23654	0.0147539	1.83109
sri	ENSDARG00000058593	393344	Both	1767.4	3108.55	2022.45	1.433	0.000824191	3.08397	1744	3124.57	2013.76	1.44101	0.000772345	3.11219
srpx	ENSDARG00000010318	541513	Both	3600.69	2673.82	2845.74	3.09287	3.04342e-12	11.5166	3637.43	2723.9	2879.07	3.10127	2.74619e-12	11.5613
ssh2a	ENSDARG00000088440	325085	Both	1953.44	2964.32	1580.97	1.86458	9.85953e-06	5.00614	1791.24	2855.75	1524.68	1.92108	6.91955e-06	5.15992
sspn	ENSDARG00000041747	641583	Both	21.3173	70.579	63.6365	1.66744	0.0489028	1.31067	107.976	132.873	177.219	1.61796	0.00273128	2.56363
ssr1	ENSDARG00000101627	373100	Ens95only	248.056	423.474	298.296	1.10675	0.0262485	1.58089	1299.56	1264.34	1326.67	0.777751	0.0509709	1.29268
ssr2	ENSDARG00000005230	83414	Both	3091.01	2594.04	2916.34	1.0738	0.00527232	2.278	3051.28	2606.36	2903.82	1.079	0.0044458	2.35205
ssr4	ENSDARG00000019444	326701	Both	2060.03	2650.29	2044.32	1.03083	0.00821024	2.08564	2033.22	2651.33	2027.62	1.03491	0.00757272	2.12075
ssrp1b	ENSDARG00000016994	449949	Both	174.415	116.609	92.4718	1.2312	0.0291981	1.53465	298.861	516.162	303.945	1.03359	0.0388641	1.41045
ssuh2rs1	ENSDARG00000063292	767720	Both	1153.07	2938.75	1770.88	1.05969	0.0348536	1.45775	492.639	1163.15	802.931	1.06423	0.029945	1.52368
st3gal3a	ENSDARG00000015374	393326	Both	568.785	912.413	725.854	1.16134	0.00679916	2.16754	562.052	921.936	724.717	1.16945	0.00651916	2.18581
st3gal4	ENSDARG00000041006	504044	RefSeqOnly	16.4725	12.2746	35.7955	0.425397	0.782735	0.106385	473.357	392.487	338.597	1.63014	0.000105094	3.97842
st3gal8	ENSDARG00000007494	445567	Both	360.457	366.193	204.83	2.00713	0.000969728	3.01335	355.741	367.957	203.95	2.00863	0.00101203	2.99481
st5	ENSDARG00000037363	323827	Both	2250.92	2019.17	1711.23	1.5403	4.47398e-05	4.34931	2087.21	1977.77	1623.68	1.54462	3.55097e-05	4.44965
stag2a	ENSDARG00000011783	567168	Both	603.668	1530.24	1079.83	1.01454	0.0457715	1.33941	600.614	1537.24	1075.19	1.02228	0.0433522	1.36299
stard13a	ENSDARG00000079542	555484	Both	934.087	731.362	586.649	1.65112	6.44778e-05	4.19059	929.362	738.98	586.11	1.65932	6.06611e-05	4.21709
[truncated: 337 more rows]
