# Supplementary material for: An improved zebrafish transcriptome annotation for sensitive and comprehensive detection of cell type-specific genes
Source: eLife. 2020 Aug 24;9:e55792. doi: 10.7554/eLife.55792 (PMC7486121; doi:10.7554/eLife.55792)
Supplement: Figure 1—source data 1. — Gene expression levels were quantified using RSEM. Median ratio normalized expression values are shown for each replicate, along with adjusted p-value, and log2 fold change. Data used to generate plots in Figure 1A,B, and incorporated into source data tables indicated below. [file elife-55792-fig1-data1.xlsx]

## Sheet: title
	Figure 1 - source data 1
	DESeq2 output for kdrl-pos and kdrl-neg RNA-seq quantified with RefSeq (GCF_000002035.6_GRCz11) or Ensembl, v95
	Worksheet 1 - RefSeq quantification
	Worksheet 2 - Ens95 quantification

## Sheet: 1 RefSeq kdrlCherry
ID	NCBI ID	Ensdarg	WTneg08	WTneg11	WTneg14	WTkdrl02	WTkdrl04	WTkdrl10	log2FoldChange	padj
a1cf	562916	ENSDARG00000002968	9.72880364700534	17.4226796388868	16.3989681471633	0	6.77099931284754	4.81511521515555	-1.90988	1
a2ml	100006972	ENSDARG00000041645	50.5897789644278	60.0114520894991	314.474330351484	0	51.2661376544171	221.495299897155	-0.640052	0.881179		total detected genes	27516
aaas	378454	ENSDARG00000102274	295.755630868962	530.423802339444	394.539880717046	351.723797489031	489.446521757265	783.900757027323	0.412784	0.605347		with ENSDARG ID	21903
aacs	393984	ENSDARG00000012468	459.199532138652	373.619685589462	548.883110337407	223.470921056567	158.634841043857	214.754138595937	-1.21099	0.0098423		kdrl-pos-enriched	1780
aadac	100148912	ENSDARG00000063621	32.1050520351176	29.0377993981447	0.964645185127252	60.2399874152485	1.93457123224215	4.81511521515555	0.109108	0.975038
aadacl4	569798	ENSDARG00000044802	16.5389661999091	15.4868263456772	3.85858074050901	0	0	2.88906912909333	-3.63239	1
aadat	557979	ENSDARG00000011410	22.3762483881123	60.0114520894991	54.0201303671261	29.1483810073783	12.574713009574	74.1527743133954	-0.235285	0.898201
aaed1	100332791	ENSDARG00000075299	11.6745643764064	9.67926646604825	16.3989681471633	39.8361207100837	15.4765698579372	18.2974378175911	0.963096	0.540329
aagab	436696	ENSDARG00000117041	151.769336893283	151.964483516957	254.666328873595	146.713517737137	208.933693082153	295.648074210551	0.22202	0.817395
aak1a	568999	ENSDARG00000011855	357.047093845096	223.591055365714	156.272519990615	142.827066936154	154.765698579372	210.902046423813	-0.535179	0.499943
aak1b	100534954	ENSDARG00000077686	166.362542363791	140.3493637577	121.545293326034	70.9277271179539	218.606549243363	157.935779057102	0.0633792	0.960094
aamdc	553802	ENSDARG00000103957	190.684551481305	238.109955064787	190.999746655196	222.499308356321	377.24139028722	160.824848186195	0.295268	0.738929
aamp	405874	ENSDARG00000045019	431.958881927037	948.568113672728	922.200796981653	844.331436513725	933.430619556839	1054.51023211906	0.298606	0.699596
aanat1	393677	ENSDARG00000036567	63.2372237055347	62.9152320293136	22.1868392579268	60.2399874152485	43.5278527254484	38.5209217212444	-0.0600422	0.970739
aanat2	30685	ENSDARG00000079802	69.0745058937379	97.7605913070873	92.6059377722162	192.379314648697	155.732984195493	126.156018637075	0.870209	0.177543
aar2	431768	ENSDARG00000018658	117.718524128765	133.573877231466	191.964391840323	281.767683071324	234.083119101301	171.418101659537	0.63265	0.357898
aars	324940	ENSDARG00000113882	1029.30742585316	1254.43293399985	1199.05396511317	833.643696811019	886.033624366906	1835.52192001729	0.0296961	0.976584
aars2	792787	ENSDARG00000071240	75.8846684466416	104.536077833321	113.828131845016	101.047720825578	134.45270064083	157.935779057102	0.419086	0.615479
aarsd1	445178	ENSDARG00000015747	46.6982575056256	30.9736526913544	52.0908399968716	44.6941842113134	28.0512828675112	44.299059979431	-0.148831	0.915821
aasdh	570338	ENSDARG00000022730	38.9152145880214	20.3264595787013	35.6918718497083	49.5522477125431	22.2475691707848	5.77813825818666	-0.291479	0.883253
aasdhppt	619247	ENSDARG00000037501	85.613472093647	105.504004479926	108.040260734252	114.650298629021	45.4624239576906	52.0032443236799	-0.49619	0.631091
aass	556229	ENSDARG00000051816	27.240650211615	45.4925523904268	38.5858074050901	71.8993398181998	16.4438554740583	19.2604608606222	-0.0491946	0.980253
aatf	559477	ENSDARG00000109548	140.094772516877	226.494835305529	227.656263690032	199.180603550418	109.303274621682	254.238083360213	-0.0786463	0.945764
aatka	100004850	ENSDARG00000078222	241.274330445732	156.804116749982	228.620908875159	267.193492567634	283.414685523475	220.532276854124	0.299217	0.683827
aatkb	555739	ENSDARG00000104442	981.636287982839	687.227919089425	1216.41757844547	109.792235127792	148.961984882646	581.66591799079	-1.77948	0.0285985
abat	378968	ENSDARG00000006031	243.220091175133	314.576160146568	474.605431082608	270.108330668372	306.629540310381	589.370102335039	0.175702	0.859393
abca12	558335		409.582633538925	686.259992442821	1949.54791914218	501.352153326907	384.012389600067	461.288037611901	-1.17726	0.137609
abca1a	558924	ENSDARG00000074635	2798.00392887874	3258.04109247184	2845.70329612539	9833.69213918919	7185.96484216348	5425.67182443727	1.33425	0.0013407
abca1b	100136868	ENSDARG00000079009	315.213238162973	727.880838246828	586.50427255737	283.710908471815	525.236089553745	844.571208738283	0.0210333	0.987127
abca2	100006090	ENSDARG00000013500	522.436755844187	285.538360748423	526.69627107948	185.578025746975	147.027413650404	286.01784378024	-1.10931	0.0678649
abca3b	564344	ENSDARG00000100524	1158.70051435834	1037.61736516037	1552.11410286975	1047.39849086513	1304.86829614733	1062.21441646331	-0.134626	0.845533
abca4a	798993	ENSDARG00000057169	71.9931469878395	53.2359655632653	27.9747103686903	0	28.0512828675112	44.299059979431	-1.08217	0.604311
abca4b	555506	ENSDARG00000062661	696.582341125582	418.144311333284	80.0655503655619	44.6941842113134	67.7099931284754	82.8199817006754	-2.61347	0.00303114
abca5	100151075	ENSDARG00000074041	389.152145880214	427.823577799332	451.453946639554	731.624363285195	919.888620931144	499.808959333146	0.762163	0.144423
abcb10	100003744	ENSDARG00000061591	124.528686681668	183.906062854917	196.787617765959	296.341873575013	190.555266375852	157.935779057102	0.351926	0.677569
abcb11a	797269	ENSDARG00000011573	34.0508127645187	24.1981661651206	17.3636133322905	109.792235127792	81.2519917541704	45.2620830224621	1.64406	0.0630767
abcb11b	571189	ENSDARG00000070078	30.1592913057166	33.8774326311689	46.3029688861081	17.489028604427	21.2802835546637	46.2251060654933	-0.376378	0.803903
abcb3l1	368771	ENSDARG00000036787	11.6745643764064	12.5830464058627	1.9292903702545	0	0	0	-5.61635	1
abcb4	100136865	ENSDARG00000010936	49.6168985997272	29.0377993981447	130.227099992179	5259.33954643129	6252.53422260664	3778.90242085407	6.19368	2.3428e-19
abcb5	798527	ENSDARG00000021787	116.745643764064	161.643749983006	479.428657008244	119.508362130251	99.6304184604709	272.535521177804	-0.624143	0.590693
abcb6a	564067	ENSDARG00000063297	136.203251058075	104.536077833321	93.5705829573435	154.486419339105	139.289128721435	78.967889528551	0.156979	0.880485
abcb6b	100004801	ENSDARG00000074254	83.6677113642459	126.798390705232	80.0655503655619	103.962558926316	76.415563673565	127.119041680106	0.0819023	0.944702
abcb7	566515	ENSDARG00000062795	285.053946857256	323.287499966011	300.969297759703	260.392203665913	252.461545807601	422.767115890657	0.0411802	0.964075
abcb8	548340	ENSDARG00000056672	184.847269293101	213.911788899666	147.59071332447	95.2180446241024	159.602126659978	126.156018637075	-0.520079	0.477518
abcb9	570148	ENSDARG00000109326	90.4778739171497	57.1076721496846	88.7473570317072	3.88645080098377	73.5137068252018	166.602986444382	0.0461675	0.983736
abcc1	100002010	ENSDARG00000104719	298.674271963064	266.179827816327	218.974457023886	308.97283867821	427.540242325516	213.791115552906	0.277855	0.730682
abcc10	556709	ENSDARG00000113210	165.389661999091	117.119124239184	75.2423244399257	185.578025746975	147.027413650404	102.080442561298	0.281042	0.782462
abcc12	568482	ENSDARG00000013050	18.4847269293101	41.6208458040075	69.4544533291622	315.774127579932	439.147669718969	247.496922058995	2.95155	1.09918e-05
abcc13	559093	ENSDARG00000062519	53.5084200585294	17.4226796388868	40.5150977753446	0	6.77099931284754	14.4453456454666	-2.39248	0.172894
abcc2	393561	ENSDARG00000116140	50.5897789644278	74.5303517885715	206.434069617232	2070.5066642241	2334.06019170016	1776.7775143924	4.22048	3.37961e-11
abcc3	323301	ENSDARG00000096662	557.460448973406	603.986227481411	644.382983665005	967.726249444959	1136.56059894226	743.453789220016	0.657143	0.165006
abcc4	368620	ENSDARG00000115375	145.93205470508	233.270321831763	230.550199245413	889.997233425284	863.786055196121	371.726894610008	1.80147	0.00149487
abcc5	336147	ENSDARG00000061233	4015.0772651191	4785.42934081425	5916.16892038544	4823.08544402086	4494.00897249852	4906.6024042435	-0.0491571	0.946051
abcc6a	566555	ENSDARG00000016750	86.5863524583475	62.9152320293136	37.6211622199628	60.2399874152485	81.2519917541704	30.8167373769955	-0.118965	0.937196
abcc6b.2	100002917	ENSDARG00000094901	58.372821882032	89.0492514876439	44.3736785158536	155.458032039351	102.532275308834	39.4839447642755	0.633126	0.58668
abcc8	553281	ENSDARG00000114458	177.064226375497	83.2416916080149	256.595619243849	126.309651031973	57.0698513511435	122.303926464951	-0.757871	0.425358
abcc8b	100329706	ENSDARG00000077007	184.847269293101	174.226796388868	42.4443881455991	85.501917621643	200.228122537063	416.025954589439	0.805584	0.503048
abcc9	561160	ENSDARG00000015985	92.4236346465507	41.6208458040075	44.3736785158536	34.006444508608	63.8408506639911	98.2283503891732	0.136346	0.927468
abcd1	566367	ENSDARG00000074876	53.5084200585294	36.7812125709833	15.434322962036	66.0696636167241	51.2661376544171	19.2604608606222	0.369647	0.820964
abcd3a	406803	ENSDARG00000110888	447.524967762246	511.065269407347	759.175760695148	373.099276894442	625.833793630337	663.522876648434	-0.0472154	0.961365
abcd3b	100170781	ENSDARG00000002947	29.186410941016	61.9473053827088	3.85858074050901	13.6025778034432	20.3129979385426	22.1495299897155	-0.760582	0.697241
abcd4	767748	ENSDARG00000061770	151.769336893283	204.232522433618	214.15123109825	232.21543535878	222.475691707848	231.125530327466	0.266437	0.710254
abce1	406324	ENSDARG00000007216	1430.13413610978	2700.51534402746	1907.10353099658	3041.1477517698	2614.57302037527	3488.06946185868	0.598779	0.27307
abcf1	406467	ENSDARG00000031795	887.266892606887	1707.42260461091	1649.5432665676	1835.37639076459	2409.5084697576	2366.14761672744	0.639366	0.25871
abcf2a	336770	ENSDARG00000038785	662.531528361064	1182.8063621511	680.074855514713	908.457874729957	919.888620931144	2084.94488816235	0.631872	0.400448
abcf2b	100000576	ENSDARG00000052331	16.5389661999091	5.80755987962895	5.78787111076351	0.971612700245943	10.6401417773318	7.70418434424888	-0.542094	1
abcf3	100331227	ENSDARG00000089705	123.555806316968	152.932410163562	115.75742221527	240.959949660994	171.209554053431	284.091797694177	0.827889	0.166226
abcg1	556979	ENSDARG00000063475	443.633446303443	188.745696087941	89.7120022168345	32.0632191081161	52.2334232705381	92.4502121309865	-2.03034	0.0225876
abcg2a	735312	ENSDARG00000100075	61.2914629761336	102.600224540111	222.833037764395	7591.21002702155	6642.35032590343	3745.19661434798	5.53874	1.48811e-17
abcg2c	569858	ENSDARG00000058574	418.33855682123	594.306961015362	385.858074050901	447.91345481338	644.212220336637	392.913401556693	0.0866137	0.919401
abcg2d	735310	ENSDARG00000016818	189.711671116604	254.564708057069	62.7019370332714	74.8141779189376	37.724139028722	81.8569586576443	-1.38289	0.122232
abcg4a	564842	ENSDARG00000061047	29.186410941016	14.5188996990724	16.3989681471633	0	9.67285616121077	14.4453456454666	-1.3169	1
abcg4b	794238	ENSDARG00000078068	87.559232823048	105.504004479926	58.8433562927624	15.5458032039351	21.2802835546637	116.525788206764	-0.715856	0.634781
abcg5	557317	ENSDARG00000115809	7.78304291760427	0.967926646604825	12.5403874066543	0	0	16.3713917315289	-0.378775	1
abcg8	100136850	ENSDARG00000063059	19.4576072940107	7.7434131728386	11.575742221527	41.7793461105756	1.93457123224215	0	0.172729	1
abch1	558667	ENSDARG00000111253	63.2372237055347	64.8510853225232	78.1362599953074	68.984501717462	101.564989692713	99.1913734322043	0.38737	0.672674
abhd10a	568517	ENSDARG00000076435	14.593205470508	10.6471931126531	20.2575488876723	0	17.4111410901794	8.66720738727999	-0.802799	1
abhd10b	492622	ENSDARG00000116787	87.559232823048	209.072155666642	255.630974058722	295.370260874767	401.423530690247	276.387613349928	0.817294	0.2769
abhd11	446169	ENSDARG00000069501	265.596339563246	240.045808357996	489.075108859517	110.763847828038	212.802835546637	182.01135513288	-0.976342	0.148883
abhd12	767657	ENSDARG00000071004	18.4847269293101	33.8774326311689	45.3383237009809	0	16.4438554740583	38.5209217212444	-0.829679	0.729415
abhd13	561333	ENSDARG00000059209	73.9389077172406	40.6529191574026	37.6211622199628	190.436089248205	81.2519917541704	69.3376590982399	1.16382	0.207965
abhd14a	404598	ENSDARG00000058367	50.5897789644278	64.8510853225232	36.6565170348356	12.6309651031973	46.4297095738117	33.7058065060888	-0.713172	0.584276
abhd14b	393338	ENSDARG00000100531	79.7761899054438	76.4662050817811	132.156390362434	171.975447943532	245.690546494753	160.824848186195	1.00416	0.124059
abhd15a	560644	ENSDARG00000116294	249.057373363337	352.325299364156	420.585300715482	369.212826093458	483.642808060538	303.352258554799	0.178016	0.828382
abhd16a	564613	ENSDARG00000078929	562.324850796909	458.797230490687	550.812400707661	491.636026324447	428.507527941637	703.00682141271	0.0462747	0.956932
abhd17aa	322121	ENSDARG00000091433	74.9117880819411	76.4662050817811	40.5150977753446	88.4167557223808	88.022991067018	83.7830047437065	0.439519	0.648275
abhd17ab	100003419	ENSDARG00000109731	723.822991337197	607.85793406783	653.06479033115	771.460483995279	1072.71974827827	1330.89784546899	0.677855	0.178233
abhd17b	437017	ENSDARG00000035571	28.2135305763155	20.3264595787013	1.9292903702545	30.1199937076242	15.4765698579372	68.3746360552088	1.1755	0.518041
abhd17c	393126	ENSDARG00000111161	632.372237055347	484.931249949017	700.332404402385	481.919899321988	523.301518321502	613.445678410817	-0.167248	0.810015
abhd18	503769	ENSDARG00000101961	108.96260084646	83.2416916080149	82.9594859209437	7.77290160196755	41.5932814932063	103.043465604329	-0.852155	0.552268
abhd2a	393888	ENSDARG00000025797	173.172704916695	157.772043396586	190.035101470069	654.866959965766	955.678188727624	677.00519925087	2.1345	1.14641e-07
abhd2b	559290	ENSDARG00000115068	293.809870139561	123.894610765418	197.752262951087	0	67.7099931284754	55.8553364958043	-2.31627	0.111132
abhd3	447830	ENSDARG00000018809	96.3151561053529	86.1454715478294	214.15123109825	86.4735303218889	148.961984882646	127.119041680106	-0.12956	0.915137
abhd4	550276	ENSDARG00000102887	252.948894822139	226.494835305529	268.171361465376	825.870795209052	521.36694708926	468.99222195615	1.28056	0.00741341
abhd5a	566493	ENSDARG00000099189	9.72880364700534	9.67926646604825	11.575742221527	40.8077334103296	15.4765698579372	0	0.861019	1
abhd6a	799085	ENSDARG00000060756	10.7016840117059	19.3585329320965	0	0	2.90185684836323	3.85209217212444	-2.15345	1
abhd6b	558995	ENSDARG00000111140	26.2677698469144	29.0377993981447	15.434322962036	20.4038667051648	0.967285616121077	18.2974378175911	-0.834512	0.69509
abhd8a	558563		46.6982575056256	17.4226796388868	39.5504525902173	41.7793461105756	3.86914246448431	15.4083686884978	-0.763957	0.681622
abhd8b	101883400	ENSDARG00000111960	99.2337971994545	89.0492514876439	69.4544533291622	150.599968538121	79.3174205219283	116.525788206764	0.426731	0.636962
abi1a	393711	ENSDARG00000010155	233.491287528128	238.109955064787	190.999746655196	1133.87202118702	1177.18659481935	599.963355808381	2.13532	3.83483e-06
abi1b	767738	ENSDARG00000062991	296.728511233663	273.923240989165	578.787111076351	103.962558926316	237.952261565785	142.527410368604	-1.24653	0.0669141
abi2a	767646	ENSDARG00000111927	352.182692021593	409.432971513841	310.615749610975	222.499308356321	282.447399907354	285.054820737208	-0.440661	0.451774
abi2b	692331	ENSDARG00000014875	956.341398500625	1200.22904178998	1853.08340062945	1305.84746913055	1526.37670223906	1304.89622330715	0.0451396	0.959251
abi3a	767807	ENSDARG00000060072	271.433621751449	316.512013439778	711.908146623912	93.2748192236105	53.2007088866592	156.00973297104	-2.10337	0.00305466
abi3b	566059	ENSDARG00000063283	48.6440182350267	135.509730524675	196.787617765959	101.047720825578	114.139702702287	123.266949507982	-0.170669	0.89439
abi3bp	101884149	ENSDARG00000062156	75.8846684466416	264.243974523117	178.459359248542	51.495473113035	17.4111410901794	20.2234839036533	-2.54085	0.00311187
abi3bpb	100149890	ENSDARG00000111438	2762.00735538482	4929.65041115837	3437.99543979353	584.910845548058	605.520795691794	1225.9283337786	-2.20349	1.43732e-05
abl1	100000720	ENSDARG00000035187	127.44732777577	92.9209580740632	36.6565170348356	164.202546341564	164.438554740583	76.0788203994576	0.65507	0.540717
abl2	570636	ENSDARG00000013841	122.582925952267	123.894610765418	83.924131106071	121.451587530743	177.013267750157	102.080442561298	0.277769	0.764677
ablim1a	100003558	ENSDARG00000060149	307.430195245369	50.3321856234509	190.035101470069	139.912228835416	126.714415711861	130.971133852231	-0.462304	0.700468
ablim1b	541550	ENSDARG00000112629	1782.31682813138	2107.1763096587	2761.77916501932	1654.65642851884	1450.92842418161	1122.88486817427	-0.653505	0.188808
ablim2	568454	ENSDARG00000109680	258.786177010342	183.906062854917	278.782458501776	1394.26422485293	1360.97086188235	453.583853267653	2.15301	0.000300922
ablim3	566821	ENSDARG00000112071	847.378797654165	394.914071814768	331.837943683775	198.208990850172	235.050404717422	216.680184682	-1.27614	0.0359095
abo	563897	ENSDARG00000019207	7.78304291760427	7.7434131728386	1.9292903702545	45.6657969115593	0	3.85209217212444	1.50424	1
abraa	324520	ENSDARG00000038583	35.9965734939198	45.4925523904268	21.2221940727996	0	1.93457123224215	22.1495299897155	-2.09185	0.321736
abrab	445477	ENSDARG00000033854	23.3491287528128	7.7434131728386	16.3989681471633	0	11.6074273934529	1.92604608606222	-1.81096	1
abracl	336650	ENSDARG00000042876	329.806443633481	362.004565830204	729.271759956203	730.652750584949	954.710903111503	1207.63089596101	1.02556	0.0877523
abraxas2a	449820	ENSDARG00000115196	91.4507542818502	119.054977532393	111.898841474761	105.905784326808	146.060128034283	111.710672991609	0.173761	0.850784
abraxas2b	406584	ENSDARG00000098907	89.5049935524491	88.081324841039	83.924131106071	96.1896573243484	90.9248479153812	85.7090508297687	0.0610913	0.95394
abt1	553568	ENSDARG00000043666	121.610045587567	183.906062854917	183.282585174178	138.94061613517	184.751552679126	178.159262960755	0.0380039	0.970551
abtb1	100536189	ENSDARG00000063354	57.3999415173315	76.4662050817811	71.3837436994167	131.167714533202	92.8594191476234	61.633474753991	0.476805	0.620512
abtb2a	559451	ENSDARG00000059751	36.9694538586203	17.4226796388868	22.1868392579268	31.0916064078702	42.5605671093274	10.5932534733422	0.137644	0.946014
abtb2b	100007078	ENSDARG00000111540	167.335422728492	183.906062854917	136.97961628807	223.470921056567	229.246691020695	176.233216874693	0.36541	0.600812
acaa1	431754	ENSDARG00000004687	84.6405917289464	145.188996990724	257.560264428976	64.1264382162322	207.966407466031	226.310415112311	0.0322367	0.983101
acaa2	406325	ENSDARG00000038881	351.209811656893	421.048091273099	398.398461457555	169.060609842794	410.129101235336	623.075908841128	0.0384685	0.975009
acaca	559403	ENSDARG00000114071	613.887510126037	744.33559123911	928.953313277544	551.876013739696	452.689668344664	585.518010162914	-0.524474	0.324753
acacb	556236	ENSDARG00000061994	449.470728491647	473.316130189759	429.267107381627	752.02822999036	530.07251763435	546.034065398639	0.435207	0.424356
acad11	393147	ENSDARG00000045411	67.1287451643368	109.375711066345	121.545293326034	161.287708240827	130.583558176345	80.8939356146132	0.322594	0.748215
acad8	394130	ENSDARG00000116771	152.742217257984	141.317290404304	255.630974058722	93.2748192236105	63.8408506639911	154.083686884978	-0.820748	0.312256
acad9	724002	ENSDARG00000055620	128.42020814047	92.9209580740632	144.696777769088	185.578025746975	160.569412276099	129.045087766169	0.376473	0.637373
acadl	394156	ENSDARG00000115321	585.673979549721	497.51429635488	730.23640514133	527.585696233547	758.351923038924	726.119374445457	0.149958	0.837697
acadm	406283	ENSDARG00000038900	1005.95829710035	1099.56467054308	1480.73035917033	972.584312946189	966.318330504955	1324.15668416778	-0.136252	0.849478
acads	445288	ENSDARG00000030781	158.579499446187	226.494835305529	366.565170348356	146.713517737137	299.858540997534	244.607852929902	-0.120994	0.912
acadsb	100037342	ENSDARG00000098174	114.799883034663	69.6907185555474	114.792777030143	223.470921056567	192.489837608094	110.747649948578	0.815454	0.275301
acadvl	573723	ENSDARG00000016687	357.047093845096	390.074438581744	310.615749610975	606.286324953469	494.28294983787	545.071042355608	0.637671	0.1736
acana	497505	ENSDARG00000035891	286.026827221957	292.313847274657	120.580648140907	17.489028604427	114.139702702287	61.633474753991	-1.85448	0.0452472
acanb	559593	ENSDARG00000113408	48.6440182350267	35.8132859243785	12.5403874066543	56.3535366142647	5.80371369672646	2.88906912909333	-0.576658	0.809717
acap1	561771	ENSDARG00000109603	80.7490702701443	178.098502975288	248.878457762831	548.961175638958	588.109654601615	880.203061330434	1.99022	0.000906557
acap2	100124613	ENSDARG00000060783	35.0236931292192	62.9152320293136	49.1969044414899	359.496699090999	468.166238202601	169.492055573475	2.76058	1.08716e-05
acap3a	322991	ENSDARG00000075990	54.4813004232299	31.9415793379592	11.575742221527	31.0916064078702	27.0839972513901	63.5595208400532	0.313175	0.855583
acap3b	100009646	ENSDARG00000099240	62.2643433408342	46.4604790370316	66.5605177737804	47.6090223120512	19.3457123224215	63.5595208400532	-0.425444	0.742372
acat1	445290	ENSDARG00000045888	659.612887266962	453.957597257663	495.827625155408	524.670858132809	424.638385477153	595.148240593226	-0.0593998	0.943867
acat2	30643	ENSDARG00000007127	270.460741386748	235.206175124972	325.085427387884	9.71612700245943	91.8921335315023	198.382746864409	-1.46941	0.207902
acbd3	406270	ENSDARG00000042623	545.785884596999	517.840755933581	774.610083657184	654.866959965766	772.86120728074	880.203061330434	0.328274	0.598184
acbd4	406368	ENSDARG00000027070	29.186410941016	27.1019461049351	63.6665822183987	0	17.4111410901794	36.5948756351822	-1.1511	0.594105
acbd5a	553674	ENSDARG00000034883	253.921775186839	110.34363771295	183.282585174178	93.2748192236105	79.3174205219283	89.5611430018932	-1.06255	0.116255
acbd5b	100004736	ENSDARG00000058410	14.593205470508	0.967926646604825	1.9292903702545	26.2335429066405	0	3.85209217212444	0.782644	1
acbd6	324090	ENSDARG00000039456	250.030253728037	236.174101771577	227.656263690032	268.16510526788	193.457123224215	322.612719415422	0.135668	0.867119
acbd7	619256	ENSDARG00000094730	366.775897492101	425.887724506123	584.574982187115	48.5806350122972	127.681701327982	350.540387663324	-1.38638	0.127775
accs	541510	ENSDARG00000052124	208.196398045914	179.066429621893	163.989681471633	125.338038331727	64.8081362801121	190.67856252016	-0.533525	0.551372
acd	794664	ENSDARG00000078055	185.820149657802	171.323016449054	207.398714802359	212.783181353862	232.148547869058	262.905290747493	0.326346	0.622638
ace	565980	ENSDARG00000079166	162.471020904989	266.179827816327	166.883617027015	2089.93891822902	2388.22818620294	1309.71133852231	3.28077	1.19003e-12
ace2	492331	ENSDARG00000016918	7.78304291760427	29.0377993981447	209.328005172614	56.3535366142647	29.0185684836323	34.6688295491199	-1.03612	0.561008
acer1	550266	ENSDARG00000010347	36.9694538586203	20.3264595787013	44.3736785158536	60.2399874152485	39.6587102609641	26.00162216184	0.308255	0.834526
acer2	100331179	ENSDARG00000077782	31.1321716704171	15.4868263456772	3.85858074050901	100.076108125332	72.5464212090807	25.0385991188088	1.96958	0.126102
acer3	555411	ENSDARG00000093366	14.593205470508	17.4226796388868	12.5403874066543	53.4386985135269	31.9204253319955	7.70418434424888	1.06244	0.512003
ache	114549	ENSDARG00000031796	1011.79557928856	509.129416114138	1491.34145620673	161.287708240827	196.358980072579	459.361991525839	-1.88239	0.00666235
acin1a	368893	ENSDARG00000111685	7810.28356781589	9312.42226698502	6380.16325443165	8343.23825701191	8654.30440743527	11574.5739541909	0.281773	0.633878
acin1b	327495	ENSDARG00000026842	1381.49011787476	1411.23705074983	1276.22557992335	1282.52876432464	1451.89570979774	1826.85471263001	0.16479	0.791554
ackr3a	100000764	ENSDARG00000062478	43.779616411524	40.6529191574026	22.1868392579268	243.874787761732	118.008845166771	111.710672991609	2.15127	0.00291022
ackr3b	561050	ENSDARG00000113530	1077.95144408819	1738.39625730226	1510.63435990928	5543.05045490311	5777.59698509119	5463.22972311548	1.95564	8.10413e-08
ackr4a	100003167	ENSDARG00000078729	24.3220091175133	41.6208458040075	36.6565170348356	18.4606413046729	15.4765698579372	11.5562765163733	-1.1735	0.328053
ackr4b	641390	ENSDARG00000040133	71.9931469878395	83.2416916080149	94.5352281424707	181.691574945991	115.106988318408	78.967889528551	0.589127	0.500554
aclya	436922	ENSDARG00000099079	294.782750504262	335.870546371874	504.509431821553	445.970229412888	606.488081307915	421.804092847626	0.377066	0.586814
aclyb	794259	ENSDARG00000055652	43.779616411524	50.3321856234509	71.3837436994167	17.489028604427	13.5419986256951	20.2234839036533	-1.69104	0.0608973
acmsd	557166	ENSDARG00000062549	9.72880364700534	20.3264595787013	36.6565170348356	2.91483810073783	13.5419986256951	36.5948756351822	-0.330404	0.890697
aco1	568448	ENSDARG00000026376	390.125026244914	452.021743964453	474.605431082608	773.403709395771	944.070761334171	617.297770582941	0.826281	0.0717801
aco2	322670	ENSDARG00000111879	2068.34365535334	1818.73416897047	2291.99695986235	971.612700245943	1208.13973453522	2464.37596711661	-0.411972	0.588591
acot11a	554842	ENSDARG00000058229	13.6203251058075	14.5188996990724	16.3989681471633	6.8012889017216	34.8222821803588	23.1125530327466	0.539609	0.777554
acot11b	641574	ENSDARG00000042122	36.9694538586203	22.262312871911	17.3636133322905	160.316095540581	137.354557489193	108.821603862515	2.40814	0.000315992
acot12	100536873	ENSDARG00000054534	14.593205470508	29.0377993981447	23.1514844430541	0	3.86914246448431	4.81511521515555	-2.94209	1
acot13	564010	ENSDARG00000114746	66.1558647996363	105.504004479926	184.247230359305	179.748349545499	183.784267063005	112.67369603464	0.419977	0.676074
acot14	557184	ENSDARG00000110067	145.93205470508	169.387163155844	176.530068878287	90.3599811228727	123.812558863498	47.1881291085244	-0.912251	0.225167
acot15	557032	ENSDARG00000111748	193.603192575406	183.906062854917	254.666328873595	230.272209958289	122.845273247377	165.639963401351	-0.285318	0.734592
acot16	402867	ENSDARG00000113784	11.6745643764064	5.80755987962895	20.2575488876723	16.517415904181	0	9.63023043031109	-0.529584	1
acot17	572757	ENSDARG00000112174	15.5660858352085	7.7434131728386	12.5403874066543	0	6.77099931284754	3.85209217212444	-1.75433	1
acot18	556673	ENSDARG00000112227	84.6405917289464	117.119124239184	125.403874066543	92.3032065233646	110.270560237803	78.967889528551	-0.216732	0.820698
acot19	492778	ENSDARG00000040427	22.3762483881123	15.4868263456772	22.1868392579268	20.4038667051648	38.6914246448431	4.81511521515555	0.0897921	0.970116
acot20	553440	ENSDARG00000042510	183.874388928401	151.964483516957	317.368265906866	72.8709525184457	155.732984195493	147.34252558376	-0.796987	0.31871
acot21	562047	ENSDARG00000042513	21.4033680234117	12.5830464058627	6.75251629589077	0	0	1.92604608606222	-4.39946	1
acot22	553217	ENSDARG00000058945	23.3491287528128	17.4226796388868	7.71716148101802	0	0	0	-6.50518	1
acot7	447878	ENSDARG00000018653	43.779616411524	24.1981661651206	68.4898081440349	128.252876432464	59.0044225833857	56.8183595388355	0.838633	0.444955
acot8	450052	ENSDARG00000014138	44.7524967762246	26.1340194583303	54.9847755522534	157.401257439843	91.8921335315023	26.00162216184	1.12892	0.335976
acot9.1	798073	ENSDARG00000114328	205.277756951813	157.772043396586	276.853168131521	329.376705383375	338.549965642377	246.533899015964	0.515029	0.439026
acot9.2	798008	ENSDARG00000113544	14.593205470508	12.5830464058627	25.0807748133086	36.9212826093458	81.2519917541704	48.1511521515555	1.67016	0.0956033
acox1	449662	ENSDARG00000014727	560.379090067507	468.476496956735	670.42840366344	578.109556646336	468.166238202601	508.476166720426	-0.128256	0.855907
acox3	406421	ENSDARG00000038865	64.2101040702352	67.7548652623377	80.0655503655619	130.196101832956	88.990276683139	78.967889528551	0.491687	0.574505
acoxl	569104	ENSDARG00000020149	28.2135305763155	4.83963323302412	15.434322962036	0	16.4438554740583	4.81511521515555	-1.18933	1
acp1	541489	ENSDARG00000076486	228.626885704625	283.602507455214	303.863233315085	360.468311791245	552.320086805135	422.767115890657	0.710621	0.179815
acp2	503759	ENSDARG00000007244	72.96602735254	64.8510853225232	26.0454199984358	25.2619302063945	46.4297095738117	92.4502121309865	0.00266378	0.999623
acp5a	406801	ENSDARG00000111996	44.7524967762246	179.066429621893	82.9594859209437	0	43.5278527254484	52.0032443236799	-1.68304	0.340609
acp5b	436725	ENSDARG00000109721	19.4576072940107	74.5303517885715	17.3636133322905	10.6877397027054	53.2007088866592	95.3392812600798	0.516061	0.784416
acp6	558758	ENSDARG00000040064	55.4541807879304	55.171818856475	50.1615496266171	135.054165334186	92.8594191476234	107.858580819484	1.06232	0.109466
acrc	541448	ENSDARG00000101060	129.393088505171	218.75142213269	135.050325917815	155.458032039351	76.415563673565	267.720405962648	0.0481842	0.971947
acsbg1	100006023	ENSDARG00000062077	21.4033680234117	4.83963323302412	6.75251629589077	0	2.90185684836323	7.70418434424888	-1.63656	1
acsbg2	335159	ENSDARG00000004094	1118.81241940561	1053.10419150605	1620.60391101378	6999.49789257178	8936.75180734263	3800.08892780076	2.37962	8.52285e-07
acsf2	751707	ENSDARG00000061201	276.298023574952	421.048091273099	364.635879978101	458.601194516085	351.124678651951	398.691539814879	0.186334	0.799718
acsf3	562292	ENSDARG00000114624	53.5084200585294	95.8247380138776	77.1716148101802	145.741905036891	68.6772787445964	74.1527743133954	0.349272	0.750843
acsl1a	555308	ENSDARG00000109220	396.935188797818	511.065269407347	654.994080701404	422.651524606985	259.232545120449	393.876424599724	-0.538977	0.393527
acsl1b	445175	ENSDARG00000003854	110.908361575861	156.804116749982	107.075615549125	147.685130437383	145.092842418161	100.154396475235	0.0681631	0.948967
acsl2	100332846	ENSDARG00000078399	153.715097622684	205.200449080223	160.131100731124	35.9496699090999	34.8222821803588	44.299059979431	-2.17327	6.19062e-05
acsl3a	567157	ENSDARG00000032079	18.4847269293101	19.3585329320965	4.82322592563626	34.006444508608	7.73828492896861	9.63023043031109	0.267903	1
acsl3b	559656	ENSDARG00000014674	1196.64284858166	1053.10419150605	1381.37190510223	1381.63325974973	1058.21046403646	1260.59716332772	0.0272779	0.971438
acsl4a	393622	ENSDARG00000004078	946.612594853619	388.138585288535	458.206462935445	974.527538346681	669.361646355785	687.598452724212	0.378924	0.645789
acsl4b	334561	ENSDARG00000010752	278.243784304353	504.289782881114	239.232005911559	649.03728376429	566.829371046951	432.397346320968	0.689873	0.290691
acsl5	447860	ENSDARG00000075931	4.86440182350267	2.90377993981447	27.9747103686903	15.5458032039351	7.73828492896861	2.88906912909333	-0.450068	1
acsl6	566863		759.819564831117	475.251983482969	788.115116248965	116.593524029513	196.358980072579	379.431078954257	-1.54693	0.0170749
acsm3	100002035	ENSDARG00000004880	167.335422728492	151.964483516957	113.828131845016	129.22448913271	155.732984195493	52.966267366711	-0.358131	0.732485
acss1	541435	ENSDARG00000109700	175.118465646096	297.153480507681	178.459359248542	102.99094622607	96.7285616121077	165.639963401351	-0.832693	0.229689
acss2	436914	ENSDARG00000112371	617.779031584839	508.161489467533	668.499113293186	348.808959388294	295.022112916928	572.035687560479	-0.561523	0.37385
acss2l	560020	ENSDARG00000069029	14.593205470508	29.0377993981447	6.75251629589077	16.517415904181	9.67285616121077	0.963023043031109	-0.892137	1
acss3	566019	ENSDARG00000032218	88.5321131877486	112.27949100616	135.050325917815	50.523860412789	85.1211342186547	86.6720738727998	-0.595214	0.480144
acta1a	550445	ENSDARG00000036371	638.20951924355	733.688398126457	315.438975536612	710.248883879784	791.239633987041	391.950378513662	0.166263	0.864562
acta1b	407658	ENSDARG00000055618	197.494714034208	107.439857773136	316.403620721739	131.167714533202	79.3174205219283	169.492055573475	-0.709463	0.431252
acta2	322509	ENSDARG00000045180	203.331996222412	359.10078589039	308.686459240721	379.900565796164	236.984975949664	616.33474753991	0.50149	0.544261
actb1	57934	ENSDARG00000113649	33413.5761256398	39761.4587158796	20707.0735439416	57857.5930742454	99580.1196084326	96926.3432349951	1.43797	0.00292743
actb2	57935	ENSDARG00000037870	59748.4747177186	87662.2126030591	81815.4167313828	164410.471459417	182887.59329686	181634.813123055	1.20631	0.000948834
actc1a	408256	ENSDARG00000042535	1064.33111898238	1838.09270190256	1787.4875280408	219.584470255583	188.62069514361	204.160885122595	-2.93711	1.15855e-12
actc1b	58114	ENSDARG00000099197	1660.70678254381	2222.35958060468	3401.33892275869	465.402483417807	623.899222398094	806.050287017039	-1.94233	5.61258e-05
actl6a	192313	ENSDARG00000115348	696.582341125582	731.752544833247	1145.99847993118	579.081169346582	749.646352493834	993.839780408105	-0.148475	0.856371
actl6b	553775	ENSDARG00000034107	19.4576072940107	14.5188996990724	53.0554851819989	0	2.90185684836323	9.63023043031109	-2.79507	0.141771
actn1	560400	ENSDARG00000007219	541.894363138197	1171.19124239184	1034.09963845641	954.123671641516	1688.8806857474	1685.29032530444	0.655841	0.328117
actn2a	100538165		23.3491287528128	15.4868263456772	12.5403874066543	84.5303049213971	1.93457123224215	4.81511521515555	0.829103	0.739865
actn2b	641575	ENSDARG00000111435	142.040533246278	89.0492514876439	79.1009051804347	47.6090223120512	45.4624239576906	31.7797604200266	-1.31297	0.0769927
actn3a	58037	ENSDARG00000111128	81.7219506348448	64.8510853225232	111.898841474761	67.0412763169701	2.90185684836323	20.2234839036533	-1.51953	0.283235
actn3b	323320	ENSDARG00000001431	137.176131422775	117.119124239184	128.297809621925	74.8141779189376	65.7754218962332	67.4116130121777	-0.879231	0.159301
actn4	322221	ENSDARG00000099786	966.07020214763	648.510853225232	826.700923654055	3095.55806298357	3672.78348441173	1805.66820568333	1.81233	8.08468e-05
actr1	406681	ENSDARG00000011611	1282.2563206753	1546.74678127451	2050.83566358054	1984.03313390222	2566.20873956922	2265.9932202522	0.482136	0.361122
actr10	393139	ENSDARG00000038432	423.202958644732	228.430688598739	330.873298498648	327.433479982883	266.970830049417	389.061309384568	0.00143647	0.999623
actr2a	406820	ENSDARG00000052438	925.209226830208	1100.53259718969	1473.01319768931	2637.92848116774	2947.31927232092	2739.80055742351	1.25061	0.00145747
actr2b	554861	ENSDARG00000070076	54.4813004232299	41.6208458040075	33.7625814794538	88.4167557223808	45.4624239576906	41.4099908503377	0.432703	0.722528
actr3	406250	ENSDARG00000091138	16.5389661999091	17.4226796388868	3.85858074050901	0	12.574713009574	35.631852592151	0.350367	1
actr3b	100038776	ENSDARG00000008790	14.593205470508	7.7434131728386	5.78787111076351	0	2.90185684836323	7.70418434424888	-1.40615	1
actr5	406809	ENSDARG00000098235	81.7219506348448	90.9851047808535	71.3837436994167	134.08255263394	155.732984195493	69.3376590982399	0.557144	0.531542
actr6	324822	ENSDARG00000021370	163.44390126969	200.360815847199	287.464265167921	110.763847828038	170.242268437309	268.68342900568	-0.244608	0.809083
actr8	326866	ENSDARG00000103610	170.254063822593	174.226796388868	205.469424432105	297.313486275259	298.891255381413	194.530654692284	0.523847	0.409071
acvr1ba	30183	ENSDARG00000018968	2000.2420298243	1411.23705074983	1830.89656137153	1297.10295482833	1661.79668849601	2061.83233512961	-0.0623136	0.938286
acvr1bb	559222	ENSDARG00000052142	44.7524967762246	36.7812125709833	18.3282585174178	17.489028604427	31.9204253319955	30.8167373769955	-0.315645	0.840725
acvr1c	100331105	ENSDARG00000086172	72.96602735254	67.7548652623377	22.1868392579268	22.3470921056567	5.80371369672646	6.74116130121777	-2.22344	0.0692917
acvr1l	30615	ENSDARG00000014986	588.592620643823	442.342477498405	496.792270340535	367.269600692967	463.329810121996	786.789826156416	0.0823128	0.929924
acvr2aa	553359	ENSDARG00000011188	1872.79470204853	1700.64711808468	1804.85114137309	1695.46416192917	2061.28564795401	2300.66204980132	0.171559	0.771199
acvr2ab	100331014	ENSDARG00000104700	1301.71392796931	1656.12249234085	1023.48854142001	726.766299783965	740.940781948745	1040.0648864736	-0.666829	0.199295
acvr2b	30457	ENSDARG00000044422	852.243199477668	957.279453492171	745.670728103366	594.626972550517	700.314786071659	608.630563195661	-0.424718	0.395254
acvrl1	266753	ENSDARG00000018179	208.196398045914	345.549812837922	367.529815533483	7714.60483995279	9563.55288658908	5100.17003589276	4.60229	1.9133e-22
acy1	393970	ENSDARG00000038475	219.870962422321	202.296669140408	308.686459240721	159.344482840335	238.919547181906	301.426212468737	-0.0628452	0.951196
acy3.1	791456	ENSDARG00000093003	13.6203251058075	69.6907185555474	75.2423244399257	22.3470921056567	63.8408506639911	86.6720738727998	0.124625	0.948861
acy3.2	436619	ENSDARG00000005525	32.1050520351176	97.7605913070873	100.323099253234	198.208990850172	42.5605671093274	239.792737714746	1.06185	0.355434
acyp1	571263	ENSDARG00000060126	102.152438293556	57.1076721496846	147.59071332447	105.905784326808	176.045982134036	74.1527743133954	0.214715	0.859393
acyp2	101886626	ENSDARG00000086271	14.593205470508	64.8510853225232	8.68180666614527	17.489028604427	18.3784267063005	13.4823226024355	-0.836571	0.64937
ada	436919	ENSDARG00000003113	127.44732777577	123.894610765418	245.019877022322	248.732851262961	110.270560237803	102.080442561298	-0.10646	0.933493
adad1	564818	ENSDARG00000089181	17.5118465646096	20.3264595787013	6.75251629589077	41.7793461105756	0.967285616121077	9.63023043031109	0.232068	0.938692
adad2	558824	ENSDARG00000105626	7.78304291760427	14.5188996990724	4.82322592563626	23.3187048059026	12.574713009574	0	0.403901	1
adal	619263	ENSDARG00000111306	55.4541807879304	53.2359655632653	86.8180666614527	100.076108125332	125.74713009574	28.8906912909333	0.38154	0.773965
adam10a	566044	ENSDARG00000053468	1461.2663077802	1883.58525429299	1967.87617765959	4914.41703784398	6027.15667405043	5248.47558451955	1.60758	3.59458e-06
adam10b	393392	ENSDARG00000015502	52.5355396938288	40.6529191574026	18.3282585174178	33.0348318083621	19.3457123224215	28.8906912909333	-0.456346	0.756373
adam11	567145	ENSDARG00000079204	39.8880949527219	17.4226796388868	27.0100651835631	0	8.70557054508969	15.4083686884978	-1.80552	0.363203
adam12	563275	ENSDARG00000079068	131.338849234572	202.296669140408	167.848262212142	718.021785481752	825.094630551278	310.093419856017	1.88572	0.00107196
adam15	795199	ENSDARG00000089213	87.559232823048	92.9209580740632	56.9140659225079	411.96378490428	329.844395097287	122.303926464951	1.86394	0.0078701
adam17a	324142	ENSDARG00000043213	521.463875479486	549.78233527154	734.094985881839	1479.76614247457	1519.60570292621	756.936111822452	1.05703	0.0459932
adam17b	560657	ENSDARG00000093093	60.3185826114331	57.1076721496846	17.3636133322905	104.934171626562	87.0557054508969	42.3730138933688	0.798086	0.503356
adam19a	565342		253.921775186839	409.432971513841	366.565170348356	207.925117852632	220.541120475605	175.270193831662	-0.770578	0.159883
adam19b	571252	ENSDARG00000067545	205.277756951813	136.47765717128	212.221940727996	10.6877397027054	48.3642808060538	91.4871890879554	-1.8795	0.0487124
adam22	100126805	ENSDARG00000060532	266.569219927946	67.7548652623377	169.777552582396	8.74451430221349	71.5791355929597	82.8199817006754	-1.62743	0.161875
adam23a	794175	ENSDARG00000062323	1278.3647992165	715.297791840965	1861.7652072956	246.78962586247	272.774543746144	576.850802775635	-1.81407	0.00371649
adam28	767749	ENSDARG00000109685	17.5118465646096	12.5830464058627	27.9747103686903	2.91483810073783	6.77099931284754	7.70418434424888	-1.73923	1
adam8a	368917	ENSDARG00000001452	255.86753591624	214.879715546271	73.3130340696712	697.617918776587	1001.14061268531	463.214083697964	1.99056	0.00301751
adam8b	100005593	ENSDARG00000057644	52.5355396938288	72.5944984953618	11.575742221527	103.962558926316	176.045982134036	109.784626905546	1.51174	0.126277
adam9	447940	ENSDARG00000010070	14.593205470508	20.3264595787013	8.68180666614527	132.139327233448	30.9531397158744	26.00162216184	2.11663	0.0834149
adamts1	565145	ENSDARG00000103519	553.568927514604	717.233645134175	281.676394057158	739.397264887163	966.318330504955	740.564720090923	0.65603	0.329865
adamts10	564734	ENSDARG00000075188	233.491287528128	375.555538882672	297.110717019194	775.346934796263	1377.41471735641	734.786581832736	1.672	0.000802813
adamts12	100003937	ENSDARG00000067549	51.5626593291283	53.2359655632653	41.4797429604719	32.0632191081161	21.2802835546637	24.0755760757777	-0.918012	0.362401
adamts13	100320289	ENSDARG00000076270	15.5660858352085	14.5188996990724	25.0807748133086	0	17.4111410901794	7.70418434424888	-1.13506	1
adamts15a	569571	ENSDARG00000111736	123.555806316968	169.387163155844	128.297809621925	27.2051556068864	36.7568534126009	12.5192995594044	-2.46166	0.000522471
adamts17	101884120	ENSDARG00000075555	215.006560598818	332.96676643206	190.035101470069	101.047720825578	72.5464212090807	62.5964977970221	-1.64377	0.00410589
adamts18	100150128	ENSDARG00000001999	93.3965150112513	61.9473053827088	49.1969044414899	12.6309651031973	24.1821404030269	22.1495299897155	-1.79428	0.041467
adamts2	571682	ENSDARG00000075930	152.742217257984	207.136302373432	100.323099253234	54.4103112137728	31.9204253319955	105.932534733422	-1.25907	0.141376
adamts3	102467218	ENSDARG00000060127	71.020266623139	69.6907185555474	26.0454199984358	15.5458032039351	21.2802835546637	25.0385991188088	-1.43035	0.171666
adamts5	565053	ENSDARG00000100307	47.6711378703262	30.9736526913544	30.8686459240721	21.3754794054108	51.2661376544171	20.2234839036533	-0.237833	0.881179
adamts6	569099	ENSDARG00000041982	67.1287451643368	95.8247380138776	55.9494207373806	24.2903175061486	46.4297095738117	19.2604608606222	-1.28263	0.167759
adamts7	560364	ENSDARG00000102478	85.613472093647	88.081324841039	53.0554851819989	185.578025746975	265.036258817175	97.2653273461421	1.27278	0.0857024
adamts8a	569618	ENSDARG00000115086	164.41678163439	192.61740267436	71.3837436994167	27.2051556068864	91.8921335315023	25.0385991188088	-1.57157	0.106182
adamts9	100333407	ENSDARG00000077778	36.9694538586203	62.9152320293136	27.0100651835631	43.7225715110674	185.718838295247	52.966267366711	1.15417	0.31914
adamtsl2	100537087	ENSDARG00000074033	43.779616411524	43.5566990972171	11.575742221527	9.71612700245943	20.3129979385426	0.963023043031109	-1.67436	0.353678
adamtsl3	100534944	ENSDARG00000027903	114.799883034663	161.643749983006	65.5958725886532	107.8490097273	21.2802835546637	25.0385991188088	-1.14981	0.331733
adamtsl4	100333903	ENSDARG00000063407	58.372821882032	40.6529191574026	31.8332911091993	83.5586922211511	87.0557054508969	23.1125530327466	0.566006	0.668019
adamtsl5	101886605	ENSDARG00000052118	50.5897789644278	53.2359655632653	56.9140659225079	9.71612700245943	18.3784267063005	35.631852592151	-1.33446	0.217974
adamtsl7	556634	ENSDARG00000055439	29.186410941016	46.4604790370316	23.1514844430541	40.8077334103296	20.3129979385426	25.0385991188088	-0.197568	0.903481
adap2	100331455	ENSDARG00000070565	52.5355396938288	88.081324841039	81.9948407358165	742.312102987901	871.52434012509	533.514765839235	3.26985	2.72064e-12
adar	58119	ENSDARG00000012389	594.429902832026	411.36882480705	569.140659225079	342.979283186818	399.488959458005	507.513143677395	-0.333364	0.610019
adarb1a	58134	ENSDARG00000041609	344.399649103989	356.197005950575	501.615496266171	1865.49638447221	1337.75600709545	1092.06813079728	1.83705	2.47435e-05
adarb1b	558759	ENSDARG00000003544	97.2880364700534	78.4020583749908	120.580648140907	102.99094622607	93.8267047637444	89.5611430018932	-0.0490385	0.964075
adarb2	558149	ENSDARG00000071823	59.3457022467326	33.8774326311689	22.1868392579268	28.1767683071324	36.7568534126009	31.7797604200266	-0.254809	0.863668
adat1	792614	ENSDARG00000061348	65.1829844349358	62.9152320293136	51.1261948117444	20.4038667051648	37.724139028722	92.4502121309865	-0.251062	0.866546
adat2	100034610	ENSDARG00000041944	72.96602735254	90.9851047808535	92.6059377722162	60.2399874152485	57.0698513511435	70.300682141271	-0.451541	0.60554
adat3	368634	ENSDARG00000005640	38.9152145880214	46.4604790370316	89.7120022168345	89.3883684226268	46.4297095738117	23.1125530327466	-0.139894	0.932494
adck1	100144553	ENSDARG00000062561	39.8880949527219	38.717065864193	19.292903702545	42.7509588108215	39.6587102609641	13.4823226024355	-0.0299226	0.988289
adck2	572087	ENSDARG00000112576	84.6405917289464	46.4604790370316	22.1868392579268	18.4606413046729	37.724139028722	22.1495299897155	-0.968378	0.447565
adck3	437001	ENSDARG00000020123	511.735071832481	675.612799330167	550.812400707661	516.897956530842	383.045103983946	709.747982713928	-0.110766	0.893613
adck4	799071	ENSDARG00000113287	156.633738716786	152.932410163562	139.873551843452	239.016724260502	140.256414337556	161.787871229226	0.267636	0.744745
adck5	100001584	ENSDARG00000075405	79.7761899054438	150.028630223748	127.333164436797	61.2116001154944	102.532275308834	105.932534733422	-0.40523	0.672137
adcy1a	557026	ENSDARG00000069026	39.8880949527219	22.262312871911	37.6211622199628	33.0348318083621	3.86914246448431	10.5932534733422	-1.07105	0.521935
adcy1b	569499	ENSDARG00000088634	35.9965734939198	26.1340194583303	9.64645185127252	21.3754794054108	1.93457123224215	0.963023043031109	-1.56462	0.481763
adcy2a	563724	ENSDARG00000058392	77.8304291760427	38.717065864193	47.2676140712354	0	22.2475691707848	68.3746360552088	-0.853942	0.704047
adcy2b	557902	ENSDARG00000014588	168.308303093192	120.022904178998	241.161296281813	5022.26604757128	3288.77109481166	2082.05581903326	4.29484	1.27334e-15
adcy3a	571825	ENSDARG00000077145	58.372821882032	35.8132859243785	30.8686459240721	14.5741905036891	50.298852038296	31.7797604200266	-0.371502	0.809918
adcy3b	564719	ENSDARG00000017437	29.186410941016	7.7434131728386	17.3636133322905	1.94322540049189	3.86914246448431	1.92604608606222	-2.81057	1
adcy5	562619	ENSDARG00000091342	69.0745058937379	43.5566990972171	57.8787111076351	45.6657969115593	21.2802835546637	20.2234839036533	-0.968125	0.36464
adcy6a	570652	ENSDARG00000114782	566.216372255711	525.58416910642	539.236658486134	1028.93784956045	1117.21488661984	775.233549640043	0.840859	0.0482417
adcy6b	560807	ENSDARG00000111136	63.2372237055347	58.0755987962895	55.9494207373806	16.517415904181	46.4297095738117	33.7058065060888	-0.874869	0.407325
adcy7	568726	ENSDARG00000060070	71.020266623139	71.626571848757	75.2423244399257	136.025778034432	45.4624239576906	158.898802100133	0.643591	0.530907
adcy8	100148976	ENSDARG00000031783	176.091346010797	50.3321856234509	188.105811099814	12.6309651031973	55.1352801189014	112.67369603464	-1.19982	0.34617
adcy9	100333702	ENSDARG00000100869	307.430195245369	324.255426612616	354.024782941702	514.95473113035	562.960228582467	563.368480173199	0.735582	0.085488
adcyap1a	259257	ENSDARG00000004015	46.6982575056256	40.6529191574026	156.272519990615	60.2399874152485	13.5419986256951	68.3746360552088	-0.777222	0.595339
adcyap1b	335625	ENSDARG00000027740	1118.81241940561	757.886564291578	2591.0369672518	161.287708240827	368.53581974213	288.906912909333	-2.44807	0.000174601
adcyap1r1a	541315	ENSDARG00000105201	13.6203251058075	9.67926646604825	8.68180666614527	12.6309651031973	4.83642808060538	4.81511521515555	-0.521525	1
adcyap1r1b	555473	ENSDARG00000113350	45.7253771409251	31.9415793379592	39.5504525902173	0	3.86914246448431	4.81511521515555	-3.75336	0.00696331
add1	555511	ENSDARG00000103962	1104.21921393511	1383.16717799829	1077.50867178714	2525.22140793921	2028.3979370059	1687.2163713905	0.807874	0.0648328
add2	570147	ENSDARG00000074581	168.308303093192	66.7869386157329	141.802842213706	32.0632191081161	68.6772787445964	85.7090508297687	-1.01526	0.272762
add3a	556762	ENSDARG00000040874	2032.34708185942	3447.75471520638	2951.81426648939	4800.73835191521	5429.3741632876	4028.32538899913	0.75788	0.109466
add3b	553243	ENSDARG00000114699	38.9152145880214	69.6907185555474	130.227099992179	15.5458032039351	23.2148547869058	5.77813825818666	-2.42313	0.0198831
adgb	555435	ENSDARG00000005595	143.986293975679	67.7548652623377	120.580648140907	47.6090223120512	20.3129979385426	28.8906912909333	-1.77943	0.0258524
adgra1	101884141		14.593205470508	7.7434131728386	10.6110970363998	14.5741905036891	66.7427075123543	7.70418434424888	1.43404	0.410778
adgra1a	560847	ENSDARG00000113675	91.4507542818502	89.0492514876439	113.828131845016	9.71612700245943	30.9531397158744	166.602986444382	-0.505777	0.77169
adgra2	560700	ENSDARG00000076994	74.9117880819411	128.734243998442	53.0554851819989	291.483810073783	325.975252632803	138.67531819648	1.55854	0.0286547
adgra3	100003592		296.728511233663	385.23480534872	319.297556277121	232.21543535878	295.022112916928	369.800848523946	-0.158549	0.838815
adgrb1a	563527	ENSDARG00000075133	751.063641548812	262.308121229907	787.150471063838	281.767683071324	305.66225469426	411.210839374284	-0.850361	0.24392
adgrb1b	100302472	ENSDARG00000078529	572.053654443914	397.817851754583	999.372411791834	107.8490097273	235.050404717422	270.609475091742	-1.68245	0.0096437
adgrb2	556993		1779.39818703728	905.979341222116	1160.46815770808	328.405092683129	297.923969765292	672.190084035714	-1.5664	0.00694787
adgrb3	566117	ENSDARG00000059832	540.921482773497	192.61740267436	793.902987359729	71.8993398181998	80.2847061380494	182.01135513288	-2.19228	0.00405486
adgrd1	791731		36.9694538586203	62.9152320293136	44.3736785158536	16.517415904181	24.1821404030269	21.1865069466844	-1.22093	0.220798
adgrd2	571770	ENSDARG00000103067	58.372821882032	43.5566990972171	53.0554851819989	52.4670858132809	4.83642808060538	5.77813825818666	-1.29714	0.424809
adgre10	569655	ENSDARG00000075855	107.016840117059	1289.27829327763	772.680793286929	4232.34492227133	125.74713009574	1226.89135682163	1.36454	0.593685
adgre13	100538238		6.81016255290374	15.4868263456772	8.68180666614527	0	2.90185684836323	16.3713917315289	-0.684247	1
adgre14	108182849	ENSDARG00000056062	14.593205470508	4.83963323302412	7.71716148101802	0	3.86914246448431	8.66720738727999	-1.11418	1
adgre15	100536619	ENSDARG00000096588	29.186410941016	17.4226796388868	16.3989681471633	18.4606413046729	4.83642808060538	0	-1.43582	1
adgre5b.2	101882660	ENSDARG00000104083	35.9965734939198	15.4868263456772	8.68180666614527	8.74451430221349	35.7895677964798	4.81511521515555	-0.285769	0.907862
adgre5b.3	792970	ENSDARG00000089904	37.9423342233208	57.1076721496846	50.1615496266171	49.5522477125431	37.724139028722	39.4839447642755	-0.19615	0.875234
adgre9	101883848	ENSDARG00000096577	28.2135305763155	12.5830464058627	22.1868392579268	25.2619302063945	2.90185684836323	25.0385991188088	-0.243434	0.915616
adgrf3a	101886922	ENSDARG00000087870	35.0236931292192	35.8132859243785	36.6565170348356	0.971612700245943	9.67285616121077	11.5562765163733	-2.27502	0.102621
adgrf3b	565465	ENSDARG00000093008	148.850695799182	50.3321856234509	62.7019370332714	7.77290160196755	60.9389938156278	13.4823226024355	-1.67174	0.194657
adgrf6	565101	ENSDARG00000042829	166.362542363791	154.868263456772	200.646198506468	134.08255263394	152.83112734713	122.303926464951	-0.350871	0.627407
adgrf7	613165		35.0236931292192	20.3264595787013	23.1514844430541	14.5741905036891	13.5419986256951	10.5932534733422	-1.02005	0.462355
adgrf8	100537224	ENSDARG00000093316	57.3999415173315	81.3058383148053	101.287744438361	0	48.3642808060538	38.5209217212444	-1.46571	0.404305
adgrg1	324948	ENSDARG00000027222	436.82328375054	444.278330791614	557.564917003552	485.806350122972	336.615394410135	636.558231443563	0.0202317	0.982968
adgrg11	563883	ENSDARG00000041413	30.1592913057166	9.67926646604825	31.8332911091993	0	19.3457123224215	12.5192995594044	-1.16923	0.623524
adgrg2a	101882832	ENSDARG00000088137	69.0745058937379	110.34363771295	196.787617765959	11.6593524029513	55.1352801189014	54.8923134527732	-1.62824	0.107396
adgrg3	799479	ENSDARG00000074782	38.9152145880214	100.664371246902	44.3736785158536	21.3754794054108	32.8877109481166	163.713917315289	0.244936	0.895425
adgrg4a	793963	ENSDARG00000105416	21.4033680234117	10.6471931126531	3.85858074050901	53.4386985135269	18.3784267063005	0	1.00001	0.721716
adgrg6	561970	ENSDARG00000054137	330.779323998182	357.16493259718	164.95432665676	204.038667051648	72.5464212090807	179.122286003786	-0.904258	0.268258
adgrg7.1	101882620		16.5389661999091	17.4226796388868	6.75251629589077	0	5.80371369672646	0.963023043031109	-2.58871	1
adgrl1.1	100334775		29.186410941016	20.3264595787013	8.68180666614527	6.8012889017216	0	8.66720738727999	-1.91135	1
adgrl1a	562531	ENSDARG00000089292	300.620032692465	166.48338321603	155.307874805488	260.392203665913	283.414685523475	281.202728565084	0.406604	0.592545
adgrl2a	57987	ENSDARG00000069356	2113.09615212956	1990.05718541952	1896.49243396018	216.669632154845	434.311241638363	550.849180613795	-2.31961	1.51364e-06
adgrl3.1	560631	ENSDARG00000061121	1048.76503314718	502.353929587904	514.155883672826	975.499151046927	752.548209342198	1955.89980039618	0.834942	0.26304
adgrl4	406676	ENSDARG00000013653	22.3762483881123	17.4226796388868	51.1261948117444	4041.90883302312	4782.2600861026	2833.21379259752	7.00202	9.02802e-31
adgrv1	415105	ENSDARG00000021137	1056.54807606478	976.637986424268	832.488794764819	136.025778034432	188.62069514361	327.427834630577	-2.1357	2.02061e-05
adh5	116517	ENSDARG00000111574	1477.80527398011	2563.06976020958	2212.89605468192	4824.05705672111	3795.6287576591	3255.01788544515	0.925087	0.0512957
adh8a	322482	ENSDARG00000113750	18.4847269293101	24.1981661651206	34.7272266645811	5.82967620147566	10.6401417773318	3.85209217212444	-1.92969	0.169394
adh8b	402841	ENSDARG00000116820	142.040533246278	176.162649682078	342.449040720175	248.732851262961	276.643686210628	263.868313790524	0.256532	0.780607
adhfe1	404618	ENSDARG00000053518	108.96260084646	110.34363771295	77.1716148101802	31.0916064078702	83.1865629864126	40.4469678073066	-0.93816	0.303384
adi1	324079	ENSDARG00000020448	361.911495668599	471.38027689655	686.827371810604	410.020559503788	952.77633187926	522.921512365892	0.310918	0.726866
adipoqa	562602	ENSDARG00000062228	21.4033680234117	12.5830464058627	8.68180666614527	0	11.6074273934529	26.00162216184	-0.181733	1
adipoqb	751715	ENSDARG00000100086	6.81016255290374	2.90377993981447	3.85858074050901	10.6877397027054	2.90185684836323	1.92604608606222	0.192821	1
adipor1a	436740	ENSDARG00000113136	1135.35138560552	669.805239450539	801.620148840747	1143.58814818948	807.683489461099	709.747982713928	0.0297112	0.974282
adipor1b	406821	ENSDARG00000042717	354.128452750994	256.500561350278	435.054978492391	401.276045201575	303.727683462018	423.730138933688	0.110252	0.895847
adipor2	560140	ENSDARG00000101849	777.331411395727	1063.7513846187	687.792016995731	2397.94014420699	3363.25208725298	1975.16026125681	1.61316	0.000220318
adka	368220	ENSDARG00000039429	422.230078280032	623.344760413507	484.251882933881	584.910845548058	513.628662160292	800.272148758852	0.311734	0.642563
adkb	322229	ENSDARG00000095947	204.304876587112	271.987387695956	384.893428865774	216.669632154845	215.704692395	328.390857673608	-0.178878	0.841426
adm2a	403114	ENSDARG00000111740	28.2135305763155	26.1340194583303	8.68180666614527	0	10.6401417773318	8.66720738727999	-1.70645	1
adm2b	100322075	ENSDARG00000078875	18.4847269293101	5.80755987962895	0	0	10.6401417773318	7.70418434424888	-0.404788	1
adma	556502	ENSDARG00000015263	71.9931469878395	109.375711066345	166.883617027015	1062.94429406906	2010.0195102996	683.746360552088	3.43119	2.12709e-08
admb	570100	ENSDARG00000069027	110.908361575861	200.360815847199	226.691618504904	15.5458032039351	53.2007088866592	56.8183595388355	-2.09892	0.00816013
admp	140619	ENSDARG00000025372	18.4847269293101	14.5188996990724	0	29.1483810073783	19.3457123224215	0.963023043031109	0.583599	1
adnp2a	100007394	ENSDARG00000060937	216.952321328219	205.200449080223	274.923877761267	387.673467398131	281.480114291233	304.315281597831	0.48178	0.423668
adnp2b	564171	ENSDARG00000028431	968.988843241732	1178.93465556468	989.725959940561	988.130116150124	1203.30330645462	1217.26112639132	0.11954	0.851829
adnpa	564637	ENSDARG00000115617	1126.59546232322	1135.37795646746	1405.48803473041	1013.39204635652	926.659620243991	1770.03635309118	0.0166791	0.985879
adnpb	100330315	ENSDARG00000115866	690.745058937379	537.199288865678	788.115116248965	240.959949660994	372.404962206614	560.479411044106	-0.780264	0.211276
adoa	494091	ENSDARG00000042827	290.89122904546	211.975935606457	197.752262951087	80.6438541204133	301.793112229776	255.201106403244	-0.135836	0.911435
adob	406474	ENSDARG00000053571	179.982867469599	190.68154938115	135.050325917815	86.4735303218889	143.158271185919	194.530654692284	-0.253617	0.79202
adora1b	100150997	ENSDARG00000075694	27.240650211615	5.80755987962895	9.64645185127252	13.6025778034432	12.574713009574	7.70418434424888	-0.333439	1
adora2aa	561701	ENSDARG00000114856	52.5355396938288	29.0377993981447	30.8686459240721	363.383149891983	249.559688959238	186.826470348035	2.83055	1.73364e-06
adora2ab	566118	ENSDARG00000058488	43.779616411524	27.1019461049351	53.0554851819989	62.1832128157404	27.0839972513901	7.70418434424888	-0.354195	0.845246
adora2b	560100	ENSDARG00000002533	71.9931469878395	38.717065864193	53.0554851819989	67.0412763169701	82.2192773702915	53.9292904097421	0.311236	0.782485
adpgk	557919	ENSDARG00000115539	68.1016255290374	53.2359655632653	33.7625814794538	10.6877397027054	9.67285616121077	17.33441477456	-2.04047	0.0377908
adpgk2	566398	ENSDARG00000062785	27.240650211615	17.4226796388868	14.4696777769088	28.1767683071324	18.3784267063005	7.70418434424888	-0.124194	0.954741
adprh	445059	ENSDARG00000040712	67.1287451643368	71.626571848757	119.616002955779	37.8928953095918	66.7427075123543	75.1157973564265	-0.523407	0.610019
adprhl1	450012	ENSDARG00000041589	55.4541807879304	38.717065864193	45.3383237009809	4.85806350122972	41.5932814932063	4.81511521515555	-1.44426	0.360407
adprhl2	796446	ENSDARG00000110712	305.484434515968	269.083607756141	357.883363682211	86.4735303218889	117.04155955065	151.194617755884	-1.39432	0.00678448
adprm	393393	ENSDARG00000026090	43.779616411524	38.717065864193	31.8332911091993	23.3187048059026	79.3174205219283	41.4099908503377	0.333424	0.817412
adra1aa	798498	ENSDARG00000028725	57.3999415173315	41.6208458040075	38.5858074050901	96.1896573243484	211.835549930516	119.414857335858	1.63527	0.0197342
adra1ab	557259	ENSDARG00000027638	79.7761899054438	100.664371246902	143.732132583961	20.4038667051648	0	7.70418434424888	-3.52817	0.00496895
adra1ba	100149100	ENSDARG00000011317	50.5897789644278	24.1981661651206	18.3282585174178	16.517415904181	9.67285616121077	14.4453456454666	-1.19619	0.385584
adra1bb	492486	ENSDARG00000116032	59.3457022467326	57.1076721496846	82.9594859209437	44.6941842113134	23.2148547869058	28.8906912909333	-1.04284	0.25489
adra1d	568614	ENSDARG00000024101	116.745643764064	140.3493637577	201.610843691596	1342.76875173989	1355.16714818563	654.855669261154	2.86966	1.69472e-08
adra2a	266750	ENSDARG00000111717	54.4813004232299	76.4662050817811	91.641292587089	96.1896573243484	39.6587102609641	89.5611430018932	0.0181001	0.991201
adra2b	266751	ENSDARG00000102096	22.3762483881123	15.4868263456772	9.64645185127252	34.006444508608	22.2475691707848	4.81511521515555	0.362164	0.866943
adra2c	266752	ENSDARG00000110072	29.186410941016	9.67926646604825	16.3989681471633	65.0980509164782	3.86914246448431	1.92604608606222	0.359164	0.899862
adra2da	266754	ENSDARG00000091277	49.6168985997272	50.3321856234509	38.5858074050901	27.2051556068864	83.1865629864126	62.5964977970221	0.320534	0.810275
adra2db	266755	ENSDARG00000116585	18.4847269293101	9.67926646604825	6.75251629589077	46.6374096118053	2.90185684836323	12.5192995594044	0.829728	0.718863
adrb1	557194	ENSDARG00000115574	23.3491287528128	19.3585329320965	7.71716148101802	39.8361207100837	23.2148547869058	15.4083686884978	0.637865	0.708952
adrb2a	565838	ENSDARG00000088124	17.5118465646096	15.4868263456772	5.78787111076351	3.88645080098377	0	0.963023043031109	-3.00069	1
adrb2b	100037315	ENSDARG00000111730	41.833855682123	31.9415793379592	14.4696777769088	39.8361207100837	40.6259958770852	6.74116130121777	-0.0171653	0.9947
adrb3a	558248	ENSDARG00000053646	198.467594398909	223.591055365714	337.625814794538	411.96378490428	562.960228582467	430.471300234906	0.887467	0.0983726
adrb3b	792519	ENSDARG00000052919	29.186410941016	33.8774326311689	12.5403874066543	0	19.3457123224215	12.5192995594044	-1.24624	0.585155
adrbk2	569403	ENSDARG00000104094	100.206677564155	95.8247380138776	66.5605177737804	158.372870140089	112.205131470045	74.1527743133954	0.392621	0.686361
adrm1	796450	ENSDARG00000113912	564.27061152631	807.250823268424	1091.97834956405	1356.37132954334	1597.95583783202	1430.0892189012	0.83166	0.0958821
adsl	334431	ENSDARG00000111547	148.850695799182	316.512013439778	265.277425909994	703.447594978063	609.389938156278	553.738249742888	1.35312	0.00837516
adss	550502	ENSDARG00000002071	10.7016840117059	30.9736526913544	15.434322962036	0	12.574713009574	0	-2.18322	1
adssl	192305	ENSDARG00000012399	429.040240832935	793.699850215956	724.448534030567	288.568971973045	600.684367611189	1173.92508945492	0.083489	0.947437
adssl1	407989	ENSDARG00000099517	35.9965734939198	35.8132859243785	30.8686459240721	24.2903175061486	40.6259958770852	43.3360369363999	0.0763943	0.961305
aebp1	793308	ENSDARG00000091726	52.5355396938288	55.171818856475	11.575742221527	46.6374096118053	28.0512828675112	3.85209217212444	-0.602987	0.761507
aebp2	406815	ENSDARG00000006038	534.111320220593	425.887724506123	608.691111815296	555.76246454068	702.249357303902	755.973088779421	0.360499	0.543812
aep1	503710	ENSDARG00000039099	55.4541807879304	22.262312871911	70.4190985142894	91.3315938231187	193.457123224215	458.398968482808	2.32682	0.00891572
aes	393395	ENSDARG00000115836	130.365968869872	179.066429621893	144.696777769088	100.076108125332	178.947838982399	160.824848186195	-0.0460644	0.965397
afap1	568356	ENSDARG00000113963	753.982282642914	482.995396655807	341.484395535047	947.322382739795	1576.67555427735	918.723983051678	1.12505	0.0515236
afap1l1a	566757	ENSDARG00000116849	139.121892152176	171.323016449054	255.630974058722	385.730241997639	422.70381424491	215.717161638969	0.855297	0.19754
afap1l1b	768144	ENSDARG00000056453	72.96602735254	109.375711066345	88.7473570317072	4779.36287250979	5497.08415641608	2533.71362621485	5.56234	3.2212e-28
afap1l2	567369	ENSDARG00000074806	223.762483881123	269.083607756141	270.100651835631	246.78962586247	317.269682087713	224.384369026248	0.0474027	0.956932
aff1	100537394		26.2677698469144	2.90377993981447	1.9292903702545	7.77290160196755	4.83642808060538	3.85209217212444	-0.917707	1
aff2	100330019	ENSDARG00000052242	319.104759621775	162.611676629611	289.393555538176	34.006444508608	93.8267047637444	161.787871229226	-1.41265	0.0942151
aff3	570215	ENSDARG00000079575	176.091346010797	141.317290404304	91.641292587089	136.025778034432	151.863841731009	141.564387325573	0.0702953	0.94735
aff4	556421	ENSDARG00000001857	1623.73732868519	1608.69408665722	1261.75590214645	3371.49606985342	2499.46603205686	2426.8180684384	0.884666	0.0335984
afg1la	561238	ENSDARG00000011466	107.989720481759	104.536077833321	132.156390362434	78.7006287199214	91.8921335315023	111.710672991609	-0.287988	0.741146
afg1lb	555926	ENSDARG00000042902	96.3151561053529	136.47765717128	150.484648879851	262.335429066405	142.190985569798	92.4502121309865	0.374689	0.713432
afg3l2	569168	ENSDARG00000062272	300.620032692465	396.849925107978	377.176267384756	306.058000577472	364.666677277646	383.283171126382	-0.0279758	0.973618
afmid	550372	ENSDARG00000099106	154.687977987385	172.290943095659	219.939102209014	155.458032039351	215.704692395	288.906912909333	0.27131	0.747006
afp4	568707	ENSDARG00000095863	16.5389661999091	40.6529191574026	322.191491832502	4.85806350122972	69.6445643607175	260.0162216184	-0.181557	0.947224
aftpha	556043	ENSDARG00000069249	525.355396938288	414.272604746865	572.999239965588	571.308267744615	621.964651165852	646.188461873874	0.28223	0.634781
aftphb	100004990	ENSDARG00000071347	50.5897789644278	19.3585329320965	0	32.0632191081161	27.0839972513901	63.5595208400532	0.811078	0.730439
aga	566517	ENSDARG00000114305	199.440474763609	313.608233499963	361.74194442272	366.297987992721	281.480114291233	402.543631987004	0.263793	0.735897
agap1	100148154	ENSDARG00000113863	1326.03593708683	744.33559123911	850.817053282237	1408.83841535662	1293.26086875388	1781.59262960755	0.618148	0.265099
agap2	565109	ENSDARG00000099874	317.158998892374	218.75142213269	831.524149579692	605.314712253223	529.105232018229	1080.5118542809	0.695779	0.451573
agap3	324332	ENSDARG00000087822	757.873804101716	646.574999932023	890.367505872454	265.250267167143	374.339533438857	453.583853267653	-1.06983	0.0246353
agbl1	100536841	ENSDARG00000104384	48.6440182350267	31.9415793379592	39.5504525902173	0	24.1821404030269	3.85209217212444	-2.0993	0.268411
agbl2	568152	ENSDARG00000079983	23.3491287528128	20.3264595787013	25.0807748133086	14.5741905036891	4.83642808060538	4.81511521515555	-1.5054	1
agbl4	550450	ENSDARG00000068050	37.9423342233208	22.262312871911	36.6565170348356	0.971612700245943	28.0512828675112	12.5192995594044	-1.22118	0.512822
agbl5	445479	ENSDARG00000045900	182.9015085637	140.3493637577	161.095745916251	118.536749430005	295.022112916928	215.717161638969	0.377696	0.670377
agfg1a	327597	ENSDARG00000030020	420.284317550631	492.674663121856	341.484395535047	793.807576100936	730.300640171413	1175.85113554098	1.10591	0.0187502
agfg1b	393560	ENSDARG00000019526	354.128452750994	432.663211032357	654.029435516277	502.323766027153	877.328053821816	618.260793625972	0.471586	0.499045
aggf1	559905	ENSDARG00000060109	276.298023574952	335.870546371874	311.580394796103	614.059226555436	509.759519695807	408.32177024519	0.729947	0.140197
agk	334270	ENSDARG00000113514	160.525260175588	172.290943095659	179.424004433669	179.748349545499	216.671978011121	156.00973297104	0.108945	0.897639
agla	567798	ENSDARG00000103811	430.986001562337	408.465044867236	572.999239965588	218.612857555337	338.549965642377	293.722028124488	-0.731156	0.172773
aglb	553352	ENSDARG00000100352	36.9694538586203	17.4226796388868	4.82322592563626	6.8012889017216	10.6401417773318	6.74116130121777	-1.2918	1
agmat	556522	ENSDARG00000059700	18.4847269293101	10.6471931126531	13.5050325917815	0	0	33.7058065060888	-0.338828	1
agmo	405819	ENSDARG00000025595	256.840416280941	484.931249949017	573.963885150715	103.962558926316	130.583558176345	160.824848186195	-1.73457	0.00179182
ago1	570775	ENSDARG00000092644	63.2372237055347	58.0755987962895	27.0100651835631	22.3470921056567	37.724139028722	44.299059979431	-0.506827	0.69751
ago2	570630	ENSDARG00000061268	1118.81241940561	1334.77084566805	904.837183649363	894.855296926514	1208.13973453522	1560.0973297104	0.125293	0.870924
ago3b	568159	ENSDARG00000063079	425.148719374133	335.870546371874	133.121035547561	525.642470833055	558.123800501861	784.863780070354	1.06346	0.120741
ago4	100535764	ENSDARG00000100854	210.142158775315	181.002282915102	183.282585174178	276.909619570094	166.373125972825	245.570875972933	0.262077	0.735273
agpat2	777624	ENSDARG00000101139	437.79616411524	599.146594248386	712.87279180904	740.368877587409	566.829371046951	573.961733646541	0.104392	0.894079
agpat3	406734	ENSDARG00000036549	3088.8951579242	2059.74790397507	1856.94198136996	1358.31455494383	2768.37143333852	1940.49143170769	-0.207472	0.798776
agpat4	406265	ENSDARG00000069044	247.111612633936	280.698727515399	357.883363682211	988.130116150124	957.612759959866	435.286415450061	1.42667	0.0092416
agpat5	767778	ENSDARG00000063187	263.650578833845	306.832746973729	418.656010345228	667.497925068963	844.4403428737	570.109641474417	1.07373	0.0253244
agpat9l	567414	ENSDARG00000112415	10.7016840117059	5.80755987962895	19.292903702545	0	23.2148547869058	20.2234839036533	0.278997	1
agps	386801	ENSDARG00000042821	46.6982575056256	36.7812125709833	26.0454199984358	50.523860412789	56.1025657350224	38.5209217212444	0.406333	0.736505
agr1	335309	ENSDARG00000060682	58.372821882032	135.509730524675	308.686459240721	105.905784326808	222.475691707848	148.305548626791	-0.0763258	0.960416
agr2	335616	ENSDARG00000070480	1130.48698378202	1388.97473787792	1585.8766843492	268.16510526788	680.001788133117	597.074286679288	-1.40965	0.00973493
agrn	565373	ENSDARG00000110127	2818.43441653745	2566.94146679599	3365.64705090898	2357.13241079666	2588.45630874	3216.49696372391	-0.100511	0.879794
agrp	100149042	ENSDARG00000116610	23.3491287528128	61.9473053827088	132.156390362434	0.971612700245943	2.90185684836323	3.85209217212444	-4.81397	9.70063e-05
agt	322485	ENSDARG00000016412	27.240650211615	35.8132859243785	87.78271184658	33.0348318083621	15.4765698579372	31.7797604200266	-0.909795	0.483097
agtpbp1	554164	ENSDARG00000105214	40.8609753174224	27.1019461049351	25.0807748133086	52.4670858132809	37.724139028722	23.1125530327466	0.28419	0.847236
agtr1a	794575	ENSDARG00000018616	24.3220091175133	5.80755987962895	2.89393555538176	0	24.1821404030269	0	-0.449404	1
agtr1b	100333455	ENSDARG00000045443	35.9965734939198	20.3264595787013	20.2575488876723	172.947060643778	115.106988318408	80.8939356146132	2.26851	0.00201451
agtr2	503772	ENSDARG00000035552	205.277756951813	421.048091273099	431.196397751882	1104.72364017964	1018.55175377549	689.524498810274	1.41128	0.00845791
agtrap	793937	ENSDARG00000114680	6.81016255290374	27.1019461049351	30.8686459240721	11.6593524029513	67.7099931284754	29.8537143339644	0.75352	0.674596
agxt2	619269	ENSDARG00000100709	52.5355396938288	64.8510853225232	69.4544533291622	0	19.3457123224215	38.5209217212444	-1.69076	0.328023
agxta	436603	ENSDARG00000052099	12.6474447411069	9.67926646604825	59.8080014778896	30.1199937076242	3.86914246448431	101.117419518266	0.717989	0.747462
agxtb	79378	ENSDARG00000018478	51.5626593291283	92.9209580740632	409.974203679082	56.3535366142647	68.6772787445964	573.961733646541	0.334202	0.864705
ahctf1	553494	ENSDARG00000077530	814.300865254347	1053.10419150605	1005.1602829026	810.324992005117	713.856784697355	1230.74344899376	-0.0603196	0.944331
ahcy	387530	ENSDARG00000005191	1807.61171761359	3910.42365228349	2500.36031984984	5834.53426497689	4045.18844661834	6927.9877715658	1.03219	0.05799
ahcyl1	798918	ENSDARG00000056331	659.612887266962	729.816691540038	1437.32132583961	310.916064078702	410.129101235336	826.273770920692	-0.869359	0.248293
ahcyl2	394240	ENSDARG00000039343	321.050520351176	309.736526913544	232.479489615668	252.619302063945	283.414685523475	334.168995931795	0.0115899	0.991056
ahdc1	100536210	ENSDARG00000093453	337.589486551085	319.415793379592	339.555105164793	53.4386985135269	52.2334232705381	55.8553364958043	-2.62516	6.66687e-10
ahi1	562701	ENSDARG00000044056	476.711378703262	607.85793406783	403.221687383192	1436.0435709635	1164.61188180978	650.040554045999	1.12757	0.0377463
ahnak	559276	ENSDARG00000061764	4230.08382571792	6458.00658614739	5553.46233077759	12297.7019470129	13932.782014608	9058.19474275061	1.11951	0.00849594
ahr1a	246224	ENSDARG00000020046	22.3762483881123	7.7434131728386	1.9292903702545	0	0.967285616121077	0.963023043031109	-4.05171	1
ahr1b	554265	ENSDARG00000023537	76.8575488113422	45.4925523904268	10.6110970363998	47.6090223120512	72.5464212090807	65.4855669261154	0.481695	0.750487
ahr2	30517	ENSDARG00000021833	1316.30713343982	1755.81893694115	1494.23539176211	6585.590882267	6580.44404647168	3333.02275193067	1.85326	3.59557e-05
ahrra	641291	ENSDARG00000099702	47.6711378703262	24.1981661651206	25.0807748133086	69.9561144177079	22.2475691707848	34.6688295491199	0.388078	0.800984
ahrrb	565319	ENSDARG00000116560	42.8067360468235	27.1019461049351	5.78787111076351	5.82967620147566	0	13.4823226024355	-1.97035	0.378113
ahsa1a	565968	ENSDARG00000028664	81.7219506348448	252.628854763859	77.1716148101802	698.589531476833	110.270560237803	248.459945102026	1.36134	0.198451
ahsa1b	321945	ENSDARG00000100317	226.681124975224	1767.43405670041	260.454199984358	3580.3928004063	307.596825926502	3065.30234596802	1.62485	0.440723
ahsg1	569558	ENSDARG00000026764	10.7016840117059	4.83963323302412	4.82322592563626	0	2.90185684836323	2.88906912909333	-1.8134	1
ahsg2	567406	ENSDARG00000069293	4.86440182350267	14.5188996990724	11.575742221527	10.6877397027054	11.6074273934529	17.33441477456	0.356141	1
aicda	493784	ENSDARG00000015734	4.86440182350267	7.7434131728386	0	16.517415904181	9.67285616121077	2.88906912909333	1.20575	1
aida	393763	ENSDARG00000014532	189.711671116604	174.226796388868	237.302715541304	365.326375292475	366.601248509888	345.725272448168	0.841849	0.0768848
aif1l	321033	ENSDARG00000009336	1068.22264044119	1043.42492504	1568.51307101691	410.020559503788	521.36694708926	970.727227375358	-0.952146	0.11512
aifm1	373125	ENSDARG00000117164	674.20609273747	848.871669072431	719.62530810493	443.05539131215	606.488081307915	725.156351402425	-0.337646	0.588975
aifm2	557507	ENSDARG00000077549	271.433621751449	463.636863723711	381.034848125265	412.935397604526	600.684367611189	576.850802775635	0.510975	0.410073
aifm3	100150876	ENSDARG00000062780	29.186410941016	35.8132859243785	25.0807748133086	18.4606413046729	8.70557054508969	13.4823226024355	-1.14811	0.377025
aifm4	791218	ENSDARG00000061634	171.226944187294	151.964483516957	302.898588129957	18.4606413046729	69.6445643607175	92.4502121309865	-1.7938	0.0357269
aifm5	557064	ENSDARG00000075551	79.7761899054438	35.8132859243785	42.4443881455991	0	29.0185684836323	12.5192995594044	-1.92754	0.269755
aig1	562261	ENSDARG00000007171	140.094772516877	43.5566990972171	77.1716148101802	12.6309651031973	22.2475691707848	92.4502121309865	-1.03429	0.463338
aim1a	556848	ENSDARG00000031782	421.257197915331	694.003405615659	564.317433299443	2814.7619926125	2198.64020544321	1746.92380005843	2.00898	2.00994e-06
aim1b	566781	ENSDARG00000006060	362.884376033299	874.037761884157	617.372918481442	355.610248290015	310.498682774866	255.201106403244	-1.00914	0.0875761
aimp1	562232	ENSDARG00000060036	373.586060045005	682.388285856401	616.408273296314	715.106947381014	932.463333940718	951.466766514736	0.636062	0.261415
aimp2	406647	ENSDARG00000018903	181.928628199	195.521182614175	268.171361465376	274.966394169602	315.335110855471	339.947134189982	0.526907	0.377962
aip	334795	ENSDARG00000104437	897.968576618593	1004.70785917581	927.02402290729	1280.58553892415	1627.94169193177	2134.05906335694	0.833522	0.0630767
aipl1	100537095	ENSDARG00000110493	63.2372237055347	29.0377993981447	8.68180666614527	49.5522477125431	4.83642808060538	12.5192995594044	-0.593553	0.785511
aire	100007662	ENSDARG00000056784	8.7559232823048	12.5830464058627	2.89393555538176	3.88645080098377	1.93457123224215	0	-2.05844	1
ajap1	101887016	ENSDARG00000038655	201.386235493011	151.964483516957	354.989428126829	24.2903175061486	40.6259958770852	52.0032443236799	-2.59877	8.21246e-05
ajuba	572549	ENSDARG00000077842	507.843550373679	736.592178066271	622.196144407078	1054.19977976685	937.299762021323	827.236793963723	0.594595	0.219491
ak1	445486	ENSDARG00000001950	487.413062714968	596.242814308572	1110.30660808147	3232.55545371825	3252.98152701518	1326.08273025384	1.83207	0.00235029
ak2	321793	ENSDARG00000005926	1179.13100201705	2830.21751467251	2342.15850948897	4165.30364595436	3436.76579407819	3689.34127785218	0.83005	0.142347
ak3	406404	ENSDARG00000058226	243.220091175133	337.806399665084	392.610590346792	746.198553788884	644.212220336637	387.135263298506	0.868389	0.134086
ak4	406590	ENSDARG00000006546	288.945468316059	245.853368237625	182.317939989051	326.461867282637	301.793112229776	267.720405962648	0.321275	0.642818
ak5	100003595	ENSDARG00000012555	31.1321716704171	26.1340194583303	43.4090333307264	25.2619302063945	0	13.4823226024355	-1.37782	0.499972
ak5l	548336	ENSDARG00000017739	57.3999415173315	55.171818856475	138.908906658324	34.006444508608	23.2148547869058	49.1141751945866	-1.24182	0.20231
ak7a	402854	ENSDARG00000019001	72.96602735254	31.9415793379592	46.3029688861081	17.489028604427	30.9531397158744	20.2234839036533	-1.13879	0.291698
ak7b	504040	ENSDARG00000017023	40.8609753174224	17.4226796388868	20.2575488876723	27.2051556068864	4.83642808060538	10.5932534733422	-0.881565	0.623198
ak8	553671	ENSDARG00000113361	28.2135305763155	19.3585329320965	30.8686459240721	7.77290160196755	2.90185684836323	1.92604608606222	-2.63889	1
akap10	566920	ENSDARG00000059549	409.582633538925	582.691841256104	742.776792547984	1050.31332896586	1139.46245579063	917.760960008647	0.840769	0.0879116
akap11	558595	ENSDARG00000075435	402.772470986021	313.608233499963	559.494207373806	327.433479982883	373.372247822736	364.022710265759	-0.260874	0.719453
akap12a	101885554	ENSDARG00000091792	151.769336893283	98.7285179536921	74.2776792547984	272.051556068864	400.456245074126	79.9309125715821	1.21216	0.182107
akap12b	567365	ENSDARG00000110544	2604.40073630333	3576.48895920483	2473.35025466628	27226.5310862918	26600.3544433296	20135.8488067375	3.09532	3.04941e-17
akap13	108190639	ENSDARG00000023868	235.437048257529	332.96676643206	169.777552582396	912.344325530941	831.865629864126	428.545254148844	1.55748	0.00601398
akap17a	393655	ENSDARG00000104768	212.087919504716	202.296669140408	160.131100731124	106.877397027054	233.115833485179	230.162507284435	-0.0109242	0.993405
akap1a	100002545	ENSDARG00000089802	8.7559232823048	12.5830464058627	3.85858074050901	0.971612700245943	0.967285616121077	7.70418434424888	-1.38491	1
akap1b	556208	ENSDARG00000006062	179.982867469599	213.911788899666	187.141165914687	178.776736845254	106.401417773318	252.312037274151	-0.11236	0.912973
akap6	100002625	ENSDARG00000077295	255.86753591624	159.707896689796	281.676394057158	74.8141779189376	86.0884198347758	179.122286003786	-1.03595	0.160687
akap7	101885028		253.921775186839	769.501684050835	976.220927348779	785.063061798722	720.627784010202	843.608185695252	0.23247	0.821904
akap8l	406500	ENSDARG00000099635	1588.71363555597	1826.4775821433	2054.69424432105	3697.95793713606	3647.63405839258	2045.46094339808	0.77977	0.122501
akap9	565037	ENSDARG00000079610	907.697380265598	964.054940018405	1196.16002955779	1009.50559555554	1221.68173316092	1222.07624160648	0.170701	0.784532
akip1	562301	ENSDARG00000115020	58.372821882032	98.7285179536921	107.075615549125	232.21543535878	137.354557489193	126.156018637075	0.907919	0.222114
akirin1	406432	ENSDARG00000116670	834.731352913058	1183.7742887977	1292.62454807052	818.097893607084	1153.00445441632	1310.67436156534	-0.0128451	0.989464
akirin2	406855	ENSDARG00000058729	650.856963984657	843.064109192802	532.484142190243	718.993398181998	613.259080620763	1380.97504370661	0.421104	0.584429
akna	556113	ENSDARG00000087110	152.742217257984	157.772043396586	60.7726466630169	31.0916064078702	24.1821404030269	55.8553364958043	-1.74012	0.0374696
aknad1	100003458		14.593205470508	9.67926646604825	8.68180666614527	0	0	7.70418434424888	-2.09575	1
akr1a1a	445326	ENSDARG00000109404	7.78304291760427	5.80755987962895	8.68180666614527	0.971612700245943	0	16.3713917315289	-0.360478	1
akr1a1b	799805	ENSDARG00000112549	255.86753591624	520.744535873396	678.145565144458	553.819239140188	746.744495645471	606.704517109599	0.390705	0.627111
akr1b1	415138	ENSDARG00000006215	47.6711378703262	86.1454715478294	163.989681471633	23.3187048059026	22.2475691707848	79.9309125715821	-1.24661	0.279248
akr7a3	436642	ENSDARG00000016649	73.9389077172406	190.68154938115	208.363359987487	169.060609842794	204.097265001547	238.829714671715	0.371669	0.702257
akt1	101910198		58.372821882032	117.119124239184	119.616002955779	158.372870140089	117.04155955065	75.1157973564265	0.24817	0.824659
akt1s1	566559	ENSDARG00000074667	921.317705371406	1026.00224540111	1070.75615549125	897.770135027252	827.02920178352	938.947466955332	-0.180175	0.753685
akt2	378972	ENSDARG00000011219	833.758472548358	1022.13053881469	680.074855514713	1417.58292965883	1457.69942349446	1474.38827888063	0.778378	0.0674769
akt2l	403146	ENSDARG00000103612	153.715097622684	211.975935606457	321.226846647375	453.743131014855	642.277649104395	357.281548964542	1.08107	0.0720616
akt3a	560549	ENSDARG00000104810	82.6948309995454	35.8132859243785	27.9747103686903	1.94322540049189	39.6587102609641	25.0385991188088	-1.13605	0.510191
akt3b	100149794	ENSDARG00000087205	93.3965150112513	36.7812125709833	30.8686459240721	27.2051556068864	52.2334232705381	107.858580819484	0.218077	0.89534
aktip	378716	ENSDARG00000115058	570.107893714513	497.51429635488	515.120528857953	389.616692798623	502.98852038296	607.66754015263	-0.0771741	0.919252
alad	550338	ENSDARG00000100372	109.93548121116	138.41351046449	114.792777030143	70.9277271179539	70.6118499768386	178.159262960755	-0.183731	0.874743
alas1	64608	ENSDARG00000021059	1284.2020814047	2233.00677371733	1718.03307471164	5655.75752813163	6098.73580964339	4310.49114060725	1.61759	9.80035e-05
alas2	64607	ENSDARG00000113125	461.145292868053	50.3321856234509	124.439228881416	289.540584673291	802.847061380494	211.865069466844	1.03635	0.40471
alcama	30194	ENSDARG00000116648	2052.77756951813	2386.9071105275	2704.86509909682	594.626972550517	727.39878332305	1399.2724815242	-1.39253	0.00758247
alcamb	323919	ENSDARG00000058538	1259.88007228719	795.635703509166	957.892668831362	113.678685928775	227.312119788453	917.760960008647	-1.25937	0.195251
aldh16a1	492710	ENSDARG00000037935	112.854122305262	161.643749983006	208.363359987487	221.527695656075	250.526974575359	300.463189425706	0.677921	0.292148
aldh18a1	557186	ENSDARG00000099579	826.948309995454	729.816691540038	696.473823661876	446.941842113134	683.870930597601	530.625696710141	-0.439554	0.423759
aldh1a2	116713	ENSDARG00000113122	774.412770301625	1168.28746245202	2182.02740875785	471.232159619282	1643.41826178971	2377.70389324381	0.123176	0.927078
aldh1a3	751785	ENSDARG00000076933	72.96602735254	86.1454715478294	61.7372918481442	0	41.5932814932063	64.5225438830843	-1.05728	0.592336
aldh1l1	100526683	ENSDARG00000114342	127.44732777577	216.815568839481	191.964391840323	84.5303049213971	153.798412963251	342.836203319075	0.116146	0.929972
aldh1l2	100333269	ENSDARG00000070230	195.548953304807	138.41351046449	161.095745916251	204.038667051648	226.344834172332	138.67531819648	0.200973	0.816509
aldh2.1	393462	ENSDARG00000089924	873.64656750108	947.600187026123	965.60983031238	779.233385597246	1056.27589280422	726.119374445457	-0.121582	0.857898
aldh2.2	368239	ENSDARG00000028087	322.023400715877	262.308121229907	271.065297020758	374.070889594688	532.007088866592	503.66105150527	0.720793	0.147194
aldh3a1	100000026	ENSDARG00000074791	82.6948309995454	43.5566990972171	84.8887762911982	45.6657969115593	145.092842418161	98.2283503891732	0.452853	0.700966
aldh3a2a	323653	ENSDARG00000028259	71.9931469878395	66.7869386157329	111.898841474761	86.4735303218889	94.7939903798655	118.451834292826	0.25775	0.796528
aldh3a2b	447920	ENSDARG00000029381	25.2948894822139	9.67926646604825	14.4696777769088	1.94322540049189	60.9389938156278	20.2234839036533	0.749308	0.739834
aldh3b1	282559	ENSDARG00000013839	65.1829844349358	136.47765717128	203.54013406185	62.1832128157404	159.602126659978	154.083686884978	-0.108417	0.939196
aldh3b2	557008	ENSDARG00000035606	342.453888374588	318.447866732987	325.085427387884	185.578025746975	241.821404030269	353.429456792417	-0.336512	0.645665
aldh4a1	394133	ENSDARG00000038207	65.1829844349358	102.600224540111	81.9948407358165	30.1199937076242	10.6401417773318	85.7090508297687	-0.981721	0.448041
aldh5a1	565235	ENSDARG00000113300	122.582925952267	53.2359655632653	29.9040007389448	0	33.8549965642377	77.0418434424888	-0.891316	0.692544
aldh6a1	436647	ENSDARG00000053485	1461.2663077802	2375.29199076824	1903.24495025607	1742.10157154098	1509.932846765	1910.63771737372	-0.152885	0.824482
aldh7a1	334197	ENSDARG00000018426	780.250052489828	1173.12709568505	1186.51357770652	852.104338115692	887.000909983027	1137.33021381974	-0.126433	0.86186
aldh8a1	447801	ENSDARG00000115119	20.4304876587112	19.3585329320965	33.7625814794538	5.82967620147566	33.8549965642377	89.5611430018932	0.813374	0.650843
aldh9a1a.1	100005587	ENSDARG00000114905	1373.70707495715	2205.90482761239	2866.92549019819	2682.62266537905	2373.71890196112	2824.54658521024	0.289828	0.677846
aldh9a1a.2	100006238	ENSDARG00000117162	11.6745643764064	5.80755987962895	7.71716148101802	2.91483810073783	3.86914246448431	15.4083686884978	-0.182823	1
aldh9a1b	399481	ENSDARG00000037061	137.176131422775	141.317290404304	137.944261473197	222.499308356321	309.531397158744	221.495299897155	0.855556	0.107821
aldoaa	336425	ENSDARG00000011665	2108.23175030606	2825.37788143948	3748.6111894045	3763.05598805254	3690.19462550191	5783.91639644484	0.608457	0.284059
aldoab	406496	ENSDARG00000034470	120.637165222866	117.119124239184	233.444134800795	201.12382895091	99.6304184604709	109.784626905546	-0.198918	0.857609
aldob	321664	ENSDARG00000053684	1312.41561198102	3360.64131701195	4655.37766342412	1654.65642851884	1334.85415024709	2605.94035444218	-0.73738	0.353688
aldoca	792692	ENSDARG00000111344	123.555806316968	185.841916148126	183.282585174178	49.5522477125431	22.2475691707848	0	-2.77887	0.0396372
aldocb	369193	ENSDARG00000019702	2875.83435805478	2714.06631707993	7098.82391735145	1672.14545712327	1631.81083439626	2561.64129446275	-1.1132	0.0786948
alg1	334161	ENSDARG00000054963	255.86753591624	123.894610765418	183.282585174178	114.650298629021	147.027413650404	180.085309046817	-0.349902	0.692515
alg10	100331575	ENSDARG00000053917	105.071079387658	36.7812125709833	26.0454199984358	55.3819239140188	15.4765698579372	62.5964977970221	-0.331097	0.846572
alg11	407614	ENSDARG00000110001	166.362542363791	124.862537412022	154.34322962036	188.492863847713	182.816981446883	117.488811249795	0.133563	0.885686
alg12	569494	ENSDARG00000111299	261.704818104444	430.727357739147	345.342976275556	193.350927348943	267.938115665538	466.103152827057	-0.162213	0.868022
alg13	557181	ENSDARG00000054374	18.4847269293101	12.5830464058627	12.5403874066543	0.971612700245943	3.86914246448431	0.963023043031109	-2.90947	1
alg14	450072	ENSDARG00000116808	38.9152145880214	30.9736526913544	47.2676140712354	20.4038667051648	65.7754218962332	34.6688295491199	0.0447871	0.979371
alg2	403068	ENSDARG00000070399	202.359115857711	257.468487996883	192.92903702545	160.316095540581	285.349256755718	287.943889866302	0.168504	0.849464
alg3	553725	ENSDARG00000053155	145.93205470508	151.964483516957	79.1009051804347	104.934171626562	85.1211342186547	117.488811249795	-0.293698	0.759043
alg5	751635	ENSDARG00000061235	367.748777856802	478.155763422783	484.251882933881	463.459258017315	781.56677782583	623.075908841128	0.489974	0.408699
alg6	445327	ENSDARG00000017617	139.121892152176	152.932410163562	112.863486659889	27.2051556068864	109.303274621682	248.459945102026	-0.072801	0.96559
alg8	327601	ENSDARG00000114612	173.172704916695	181.002282915102	201.610843691596	107.8490097273	197.3262656887	209.939023380782	-0.109594	0.910808
alg9	393598	ENSDARG00000012840	545.785884596999	392.978218521559	595.186079223515	465.402483417807	386.914246448431	487.289659773741	-0.195442	0.78076
alk	563509	ENSDARG00000095833	119.664284858166	60.0114520894991	44.3736785158536	36.9212826093458	55.1352801189014	22.1495299897155	-0.972151	0.370673
alkbh1	553720	ENSDARG00000071164	104.098199022957	211.975935606457	164.95432665676	71.8993398181998	163.471269124462	242.68180684384	-0.00891449	0.995434
alkbh2	569291	ENSDARG00000115064	42.8067360468235	58.0755987962895	66.5605177737804	24.2903175061486	36.7568534126009	48.1511521515555	-0.616638	0.576897
alkbh3	792266	ENSDARG00000045606	162.471020904989	130.670097291651	162.060391101378	129.22448913271	180.882410214641	126.156018637075	-0.0613058	0.950653
alkbh4	553475	ENSDARG00000052247	81.7219506348448	117.119124239184	167.848262212142	88.4167557223808	185.718838295247	134.823226024355	0.157366	0.888318
alkbh5	570158	ENSDARG00000063003	71.020266623139	58.0755987962895	39.5504525902173	127.281263732219	61.9062794317489	56.8183595388355	0.544682	0.615696
alkbh6	317736	ENSDARG00000077253	36.9694538586203	36.7812125709833	27.0100651835631	34.978057208854	41.5932814932063	35.631852592151	0.155243	0.912394
alkbh7	550272	ENSDARG00000037906	74.9117880819411	88.081324841039	122.509938511161	54.4103112137728	71.5791355929597	92.4502121309865	-0.386246	0.692744
alkbh8	556362	ENSDARG00000060256	102.152438293556	178.098502975288	156.272519990615	111.735460528283	125.74713009574	141.564387325573	-0.203695	0.824219
allc	436989	ENSDARG00000042562	13.6203251058075	9.67926646604825	22.1868392579268	0	17.4111410901794	12.5192995594044	-0.603671	1
alms1	561882	ENSDARG00000074779	594.429902832026	731.752544833247	454.347882194936	384.758629297393	582.305940904888	577.813825818666	-0.204791	0.785879
alox12	322732	ENSDARG00000069463	139.121892152176	148.092776930538	236.338070356177	66.0696636167241	111.237845853924	162.750894272257	-0.6225	0.47191
alox5a	567204	ENSDARG00000110148	35.0236931292192	50.3321856234509	93.5705829573435	21.3754794054108	49.3315664221749	41.4099908503377	-0.674368	0.584516
alox5ap	337376	ENSDARG00000113460	10.7016840117059	19.3585329320965	29.9040007389448	30.1199937076242	23.2148547869058	51.0402212806488	0.799479	0.577524
alox5b.1	573013	ENSDARG00000043085	7.78304291760427	4.83963323302412	3.85858074050901	15.5458032039351	1.93457123224215	1.92604608606222	0.235456	1
alox5b.2	724056	ENSDARG00000043089	19.4576072940107	2.90377993981447	1.9292903702545	9.71612700245943	0.967285616121077	0	-1.1854	1
alox5b.3	553602	ENSDARG00000069966	24.3220091175133	12.5830464058627	3.85858074050901	32.0632191081161	4.83642808060538	4.81511521515555	0.0332127	1
alp3	100330410	ENSDARG00000098063	14.593205470508	7.7434131728386	6.75251629589077	0	16.4438554740583	0.963023043031109	-0.740699	1
alpi.1	541539	ENSDARG00000015273	265.596339563246	437.502844265381	499.686205895917	49.5522477125431	200.228122537063	131.934156895262	-1.65578	0.0233925
alpi.2	574009	ENSDARG00000053774	18.4847269293101	29.0377993981447	7.71716148101802	0	19.3457123224215	22.1495299897155	-0.412525	0.88823
alpk1	100333928		142.040533246278	152.932410163562	147.59071332447	181.691574945991	178.947838982399	130.0081108092	0.148761	0.859393
alpk2	559835	ENSDARG00000079637	73.9389077172406	30.9736526913544	16.3989681471633	64.1264382162322	32.8877109481166	5.77813825818666	-0.239028	0.912042
alpk3a	100321139	ENSDARG00000078989	79.7761899054438	81.3058383148053	51.1261948117444	52.4670858132809	51.2661376544171	19.2604608606222	-0.786998	0.463412
alpk3b	100534893	ENSDARG00000105630	82.6948309995454	52.2680389166605	46.3029688861081	31.0916064078702	31.9204253319955	27.9276682479022	-0.995067	0.283291
alpl	393982	ENSDARG00000015546	300.620032692465	419.112237979889	328.944008128393	2274.54533127575	3319.72423452753	1198.96368857373	2.69552	1.64025e-07
als2a	557014	ENSDARG00000112274	141.067652881577	169.387163155844	309.651104425848	381.843791196656	377.24139028722	286.01784378024	0.752993	0.261112
als2b	100318899	ENSDARG00000076924	584.701099185021	496.546369708275	498.72156071079	516.897956530842	466.231666970359	459.361991525839	-0.131331	0.840453
alx1	565176	ENSDARG00000110530	24.3220091175133	30.9736526913544	27.0100651835631	0	10.6401417773318	6.74116130121777	-2.24306	0.211684
alx3	566955		94.3693953759518	167.451309862635	169.777552582396	0	49.3315664221749	6.74116130121777	-2.94427	0.0499087
alx4a	100006399	ENSDARG00000088332	268.514980657347	610.761714007644	379.10555775501	68.984501717462	66.7427075123543	28.8906912909333	-2.93452	2.37694e-06
alx4b	497424	ENSDARG00000074442	28.2135305763155	12.5830464058627	32.7979362943266	0	9.67285616121077	9.63023043031109	-1.93035	1
alyref	560127	ENSDARG00000077732	3469.2913805221	4271.46029146709	3350.21272794695	6883.87598124251	5437.11244821657	6710.34456384077	0.778992	0.0485371
amacr	553653	ENSDARG00000117070	21.4033680234117	45.4925523904268	8.68180666614527	16.517415904181	6.77099931284754	0	-1.69876	0.452177
ambp	394093	ENSDARG00000112731	41.833855682123	50.3321856234509	210.292650357741	3.88645080098377	77.3828492896861	213.791115552906	-0.0357055	0.989774
ambra1a	100332642	ENSDARG00000008322	344.399649103989	411.36882480705	364.635879978101	371.15605149395	333.713537561771	355.355502878479	-0.0796575	0.912499
ambra1b	559106	ENSDARG00000039878	174.145585281396	89.0492514876439	131.191745177306	187.521251147467	132.518129408587	93.4132351740176	0.0680875	0.954561
amd1	792097	ENSDARG00000111778	1844.58117147221	2161.38020186857	2280.42121764082	2198.75954065657	2335.02747731628	2536.60269534394	0.169559	0.765632
amdhd2	402981	ENSDARG00000100376	153.715097622684	164.54752992282	231.514844430541	356.581860990261	397.554388225762	387.135263298506	1.05368	0.0276194
amer1	100885784	ENSDARG00000079624	520.490995114786	419.112237979889	586.50427255737	515.926343830596	328.877109481166	366.911779394853	-0.332829	0.617304
amer2	100101649	ENSDARG00000075222	897.968576618593	627.216466999926	463.994334046208	128.252876432464	245.690546494753	722.267282273332	-0.859603	0.380426
amfr	406442	ENSDARG00000020218	616.806151220139	911.786901101745	774.610083657184	1470.05001547211	893.771909295875	1317.41552286656	0.67654	0.196201
amfrb	101884807	ENSDARG00000105578	29.186410941016	38.717065864193	18.3282585174178	21.3754794054108	16.4438554740583	3.85209217212444	-1.04942	0.518637
amh	493624	ENSDARG00000014357	21.4033680234117	4.83963323302412	9.64645185127252	25.2619302063945	15.4765698579372	0.963023043031109	0.216476	1
amigo1	100144409	ENSDARG00000079620	94.3693953759518	43.5566990972171	56.9140659225079	3.88645080098377	5.80371369672646	30.8167373769955	-2.26551	0.0741341
amigo3	100000131	ENSDARG00000074469	206.250637316513	131.638023938256	187.141165914687	224.442533756813	103.499560924955	151.194617755884	-0.131988	0.899295
ammecr1	393553	ENSDARG00000012892	827.921190360154	869.198128651132	696.473823661876	2033.58538161476	1872.6649528104	1073.77069297969	1.05697	0.0276194
amn	793454	ENSDARG00000062947	29.186410941016	20.3264595787013	20.2575488876723	135.054165334186	5.80371369672646	39.4839447642755	1.37002	0.396468
amn1	751744	ENSDARG00000111705	145.93205470508	154.868263456772	242.12594146694	148.656743137629	152.83112734713	113.636719077671	-0.387282	0.62584
amot	563421	ENSDARG00000078335	113.827002669962	178.098502975288	90.6766474019617	199.180603550418	305.66225469426	203.197862079564	0.888	0.183277
amotl1	101884950	ENSDARG00000019442	61.2914629761336	62.9152320293136	27.9747103686903	18.4606413046729	43.5278527254484	27.9276682479022	-0.759006	0.538538
amotl2a	558920	ENSDARG00000061923	64.2101040702352	83.2416916080149	17.3636133322905	74.8141779189376	209.900978698274	107.858580819484	1.2522	0.231401
amotl2b	559784	ENSDARG00000061948	616.806151220139	1073.43065108475	384.893428865774	698.589531476833	907.31390792157	859.01655438375	0.248348	0.780174
ampd1	393867	ENSDARG00000033832	34.0508127645187	43.5566990972171	30.8686459240721	22.3470921056567	0.967285616121077	18.2974378175911	-1.38236	0.411519
ampd2a	100330772	ENSDARG00000104491	671.287451643368	1140.21758970048	1204.84183622394	1671.17384442302	1720.8011110794	994.802803451136	0.540344	0.401046
ampd2b	571355	ENSDARG00000029952	263.650578833845	179.066429621893	325.085427387884	93.2748192236105	83.1865629864126	191.641585563191	-1.06056	0.137598
ampd3a	556578	ENSDARG00000005800	138.149011787476	83.2416916080149	27.9747103686903	62.1832128157404	33.8549965642377	52.966267366711	-0.742833	0.544744
ampd3b	333997	ENSDARG00000117191	66.1558647996363	138.41351046449	203.54013406185	55.3819239140188	96.7285616121077	227.273438155342	-0.105272	0.946695
amph	393804	ENSDARG00000007663	1048.76503314718	515.904902640371	1244.39228881416	81.6154668206592	177.980553366278	740.564720090923	-1.48982	0.140221
amt	450000	ENSDARG00000010862	108.96260084646	121.958757472208	161.095745916251	65.0980509164782	56.1025657350224	139.638341239511	-0.587687	0.533097
amy2a	406539	ENSDARG00000013856	12.6474447411069	2.90377993981447	41.4797429604719	0	5.80371369672646	3.85209217212444	-2.56191	1
anapc1	568795	ENSDARG00000075687	208.196398045914	309.736526913544	215.115876283377	314.802514879686	332.74625194565	381.357125040319	0.489136	0.416975
anapc10	798352	ENSDARG00000090152	104.098199022957	157.772043396586	241.161296281813	239.016724260502	383.045103983946	249.422968145057	0.792768	0.265719
anapc11	768140	ENSDARG00000116987	130.365968869872	205.200449080223	419.620655530355	381.843791196656	383.045103983946	238.829714671715	0.410389	0.672608
anapc13	569473	ENSDARG00000078435	93.3965150112513	146.156923637329	220.903747394141	308.97283867821	486.544664908901	124.229972551013	0.99811	0.257196
anapc15	751740	ENSDARG00000101285	90.4778739171497	151.964483516957	178.459359248542	213.754794054107	206.99912184991	152.157640798915	0.444742	0.582041
anapc16	550576	ENSDARG00000013822	263.650578833845	468.476496956735	699.367759217258	696.646306076341	820.258202470673	557.590341915012	0.535206	0.472721
anapc2	100318335	ENSDARG00000105035	131.338849234572	176.162649682078	180.388649618796	174.89028604427	159.602126659978	155.046709928009	0.00481803	0.996816
anapc4	494046	ENSDARG00000032237	91.4507542818502	115.183270945974	124.439228881416	30.1199937076242	117.04155955065	149.268571669822	-0.159387	0.910823
anapc5	322854	ENSDARG00000008461	150.796456528583	179.066429621893	185.211875544432	115.621911329267	190.555266375852	245.570875972933	0.0992682	0.92072
anapc7	558402	ENSDARG00000063005	43.779616411524	36.7812125709833	5.78787111076351	0	20.3129979385426	28.8906912909333	-0.81115	0.756717
and1	794315	ENSDARG00000088514	295.755630868962	264.243974523117	607.726466630169	137.969003434924	328.877109481166	202.234839036533	-0.803454	0.312521
and2	566702	ENSDARG00000079302	388.179265515513	361.0366391836	1410.31126065604	239.988336960748	485.57737929278	310.093419856017	-1.06017	0.224139
and3	561047	ENSDARG00000056873	145.93205470508	105.504004479926	275.888522946394	34.978057208854	443.016812183453	84.7460277867376	0.0937723	0.961747
angel1	569547	ENSDARG00000077567	44.7524967762246	64.8510853225232	53.0554851819989	30.1199937076242	54.1679945027803	36.5948756351822	-0.428236	0.710837
angel2	562704	ENSDARG00000016743	201.386235493011	187.777769441336	219.939102209014	123.394812931235	208.933693082153	227.273438155342	-0.122241	0.895136
angpt1	114407	ENSDARG00000030364	23.3491287528128	36.7812125709833	3.85858074050901	59.2683747150025	0.967285616121077	8.66720738727999	0.106642	0.974016
angpt2a	101101687	ENSDARG00000014946	14.593205470508	9.67926646604825	15.434322962036	1552.63709499302	1761.42710695648	557.590341915012	6.60741	1.0615e-22
angpt2b	114408	ENSDARG00000053906	17.5118465646096	27.1019461049351	13.5050325917815	0	7.73828492896861	3.85209217212444	-2.32565	1
angpt4	571050	ENSDARG00000076787	28.2135305763155	26.1340194583303	12.5403874066543	14.5741905036891	6.77099931284754	1.92604608606222	-1.52362	1
angptl1a	544656	ENSDARG00000012071	346.34540983339	819.833869674286	398.398461457555	79.6722414201673	57.0698513511435	102.080442561298	-2.71172	2.9041e-06
angptl1b	334311	ENSDARG00000100159	35.9965734939198	20.3264595787013	14.4696777769088	35.9496699090999	28.0512828675112	32.7427834630577	0.450751	0.760544
angptl2a	569092	ENSDARG00000024030	35.9965734939198	41.6208458040075	24.1161296281813	14.5741905036891	12.574713009574	1.92604608606222	-1.80733	0.206032
angptl2b	503514	ENSDARG00000068369	561.351970432208	900.171781342487	462.065043675954	151.571581238367	338.549965642377	286.01784378024	-1.30938	0.0290605
angptl3	114421	ENSDARG00000044365	45.7253771409251	27.1019461049351	64.6312274035259	34.978057208854	92.8594191476234	78.0048664855199	0.582561	0.630201
angptl4	492647	ENSDARG00000035859	5138.75408634822	7695.01684050836	1410.31126065604	3820.38113736705	4804.50765527339	4154.48140763621	-0.156543	0.895259
angptl5	566212	ENSDARG00000056630	240.301450081032	368.780052356438	251.772393318213	96.1896573243484	19.3457123224215	20.2234839036533	-2.66496	0.00167864
angptl6	561927	ENSDARG00000020265	41.833855682123	12.5830464058627	43.4090333307264	16.517415904181	3.86914246448431	10.5932534733422	-1.65905	0.262479
angptl7	450053	ENSDARG00000110344	2252.21804428174	2327.8635850846	1457.57887472728	109.792235127792	171.209554053431	275.424590306897	-3.43965	1.83356e-11
ank1a	449796	ENSDARG00000092143	373.586060045005	414.272604746865	370.423751088865	64.1264382162322	73.5137068252018	77.0418434424888	-2.43166	4.19624e-09
ank1b	797662	ENSDARG00000116496	229.599766069326	136.47765717128	485.216528119008	157.401257439843	106.401417773318	52.966267366711	-1.42632	0.0912701
ank2a	568926	ENSDARG00000110704	893.10417479509	497.51429635488	984.902734014925	120.479974830497	155.732984195493	395.802470685786	-1.82162	0.00730497
ank2b	450043	ENSDARG00000043313	4113.33818195386	1447.05033667421	2010.32056580519	370.184438793704	627.768364862579	1325.11970721081	-1.70437	0.0185832
ank3a	103909035	ENSDARG00000111919	1987.59458508319	1094.72503731006	2884.28910353048	272.051556068864	364.666677277646	796.420056586727	-2.05771	0.00146495
ank3b	100126016		2284.32309631685	2367.5485775954	3110.01607685026	486.777962823218	996.304184604709	1224.00228769254	-1.51965	0.00348604
ankar	368636	ENSDARG00000000516	38.9152145880214	15.4868263456772	14.4696777769088	51.495473113035	8.70557054508969	1.92604608606222	-0.148831	0.958288
ankdd1a	569271	ENSDARG00000098647	45.7253771409251	55.171818856475	26.0454199984358	266.221879867388	178.947838982399	121.34090342192	2.15797	0.00137077
ankdd1b	562681	ENSDARG00000025866	22.3762483881123	26.1340194583303	15.434322962036	22.3470921056567	11.6074273934529	15.4083686884978	-0.373446	0.832129
ankef1a	566413	ENSDARG00000019135	43.779616411524	26.1340194583303	20.2575488876723	34.978057208854	7.73828492896861	0	-1.07813	0.65192
ankef1b	100149106	ENSDARG00000060211	33.0779323998182	20.3264595787013	20.2575488876723	60.2399874152485	4.83642808060538	38.5209217212444	0.492007	0.801773
ankfy1	568480	ENSDARG00000111387	205.277756951813	151.964483516957	193.893682210578	290.512197373537	485.57737929278	231.125530327466	0.869892	0.165637
ankha	571148	ENSDARG00000071724	95.3422757406523	50.3321856234509	54.9847755522534	17.489028604427	28.0512828675112	46.2251060654933	-1.12846	0.268685
ankhb	323738	ENSDARG00000014969	366.775897492101	249.725074824045	478.464011823117	83.5586922211511	96.7285616121077	316.834581157235	-1.13914	0.185125
ankhd1	563327	ENSDARG00000077860	1171.34795909944	1847.77196836861	1488.44752065135	2124.91697543788	2492.69503274401	2011.75513689199	0.556517	0.257962
ankib1a	566524	ENSDARG00000060768	256.840416280941	273.923240989165	312.54503998123	343.950895887064	455.591525193027	338.021088103919	0.431798	0.46
ankib1b	561277	ENSDARG00000076829	758.846684466416	722.073278367199	864.322085874018	1007.56237015504	1124.95317154881	822.421678748568	0.333381	0.542565
ankk1	100170831	ENSDARG00000056921	29.186410941016	4.83963323302412	3.85858074050901	12.6309651031973	2.90185684836323	0	-1.2866	1
ankle2	559297	ENSDARG00000035607	286.999707586658	245.853368237625	324.120782202757	98.1328827248403	140.256414337556	196.456700778346	-0.978677	0.0980943
ankmy1	568987	ENSDARG00000062702	62.2643433408342	43.5566990972171	41.4797429604719	91.3315938231187	26.1167116352691	65.4855669261154	0.312569	0.820698
ankmy2a	334389	ENSDARG00000005948	153.715097622684	152.932410163562	151.449294064979	61.2116001154944	175.078696517915	181.048332089849	-0.134366	0.909352
ankra2	406403	ENSDARG00000111289	337.589486551085	354.261152657366	674.286984403949	406.134108702804	375.306819054978	340.910157233013	-0.283612	0.72324
ankrd10a	393955	ENSDARG00000037100	388.179265515513	262.308121229907	278.782458501776	57.3251493145106	82.2192773702915	283.128774651146	-1.13646	0.216362
ankrd10b	559527	ENSDARG00000004771	324.942041809978	331.03091313885	395.504525902173	334.234768884604	248.592403343117	394.839447642755	-0.105002	0.896247
ankrd11	327352	ENSDARG00000051886	8014.588444403	10908.5333072364	8169.5800728427	11963.4671781283	12976.1365402642	11321.2988938737	0.420511	0.376121
ankrd12	393119	ENSDARG00000052419	2986.74271963064	4539.57597257663	3162.10691684713	5088.335711188	4293.78084996146	5235.95628496014	0.451704	0.381941
ankrd13a	556837	ENSDARG00000061901	127.44732777577	185.841916148126	259.489554799231	417.793461105756	313.400539623229	285.054820737208	0.82713	0.185058
ankrd13b	568981	ENSDARG00000014652	50.5897789644278	27.1019461049351	27.0100651835631	28.1767683071324	32.8877109481166	25.0385991188088	-0.282049	0.847432
ankrd13c	325167	ENSDARG00000103831	1011.79557928856	1024.0663921079	1105.48338215583	1087.23461157521	1046.603036643	1288.52483157562	0.123613	0.840457
ankrd13d	562931	ENSDARG00000098140	169.281183457893	79.3699850215956	208.363359987487	60.2399874152485	88.990276683139	104.00648864736	-0.851701	0.311453
ankrd16	550225	ENSDARG00000113646	58.372821882032	53.2359655632653	78.1362599953074	51.495473113035	37.724139028722	70.300682141271	-0.2503	0.832129
ankrd1a	100151027	ENSDARG00000110628	61.2914629761336	98.7285179536921	71.3837436994167	25.2619302063945	31.9204253319955	3.85209217212444	-1.92296	0.0834149
ankrd1b	564159	ENSDARG00000076192	5.8372821882032	4.83963323302412	8.68180666614527	32.0632191081161	0	9.63023043031109	1.10662	1
ankrd2	101886079	ENSDARG00000002722	12.6474447411069	4.83963323302412	3.85858074050901	0	0	2.88906912909333	-2.88338	1
ankrd22	393244	ENSDARG00000002298	61.2914629761336	154.868263456772	81.0301955506892	0.971612700245943	173.144125285673	144.453456454666	0.100251	0.968618
ankrd24	565326	ENSDARG00000062103	110.908361575861	107.439857773136	80.0655503655619	52.4670858132809	68.6772787445964	20.2234839036533	-1.07795	0.241422
ankrd27	386887	ENSDARG00000089207	24.3220091175133	30.9736526913544	21.2221940727996	48.5806350122972	16.4438554740583	23.1125530327466	0.203824	0.907038
ankrd28b	560747	ENSDARG00000009023	518.545234385385	741.431811299296	666.569822922931	1326.25133583571	1218.77987631256	859.01655438375	0.821216	0.0853988
ankrd29	553798	ENSDARG00000112325	56.427061152631	26.1340194583303	66.5605177737804	43.7225715110674	43.5278527254484	19.2604608606222	-0.485613	0.724563
ankrd33aa	557568	ENSDARG00000055638	173.172704916695	228.430688598739	64.6312274035259	29.1483810073783	45.4624239576906	12.5192995594044	-2.4199	0.00640571
ankrd33ab	569518	ENSDARG00000002508	84.6405917289464	81.3058383148053	39.5504525902173	34.006444508608	4.83642808060538	0.963023043031109	-2.36852	0.119895
ankrd33ba	568270	ENSDARG00000109989	76.8575488113422	19.3585329320965	10.6110970363998	36.9212826093458	6.77099931284754	0	-1.29001	0.605019
ankrd33bb	557905	ENSDARG00000015589	188.738790751904	124.862537412022	100.323099253234	48.5806350122972	48.3642808060538	46.2251060654933	-1.53159	0.0168063
ankrd34a	798097		145.93205470508	117.119124239184	268.171361465376	14.5741905036891	28.0512828675112	22.1495299897155	-3.0357	1.08615e-05
ankrd34ba	560938	ENSDARG00000077086	50.5897789644278	31.9415793379592	26.0454199984358	20.4038667051648	43.5278527254484	29.8537143339644	-0.211112	0.892406
ankrd34bb	565548	ENSDARG00000061641	109.93548121116	123.894610765418	97.4291636978525	104.934171626562	7.73828492896861	68.3746360552088	-0.871637	0.52475
ankrd34c	566743	ENSDARG00000093286	94.3693953759518	41.6208458040075	83.924131106071	16.517415904181	12.574713009574	26.00162216184	-1.99679	0.0262412
ankrd37	793783	ENSDARG00000056376	32.1050520351176	33.8774326311689	19.292903702545	0	7.73828492896861	23.1125530327466	-1.46638	0.495498
ankrd39	100000333	ENSDARG00000041350	21.4033680234117	17.4226796388868	29.9040007389448	109.792235127792	24.1821404030269	20.2234839036533	1.16558	0.410488
ankrd40	100005118	ENSDARG00000076490	322.023400715877	233.270321831763	344.378331090429	212.783181353862	336.615394410135	347.65131853423	-0.00418386	0.99724
ankrd44	561373	ENSDARG00000026028	505.897789644278	245.853368237625	374.282331829374	281.767683071324	322.106110168318	600.926378851412	0.0975865	0.926802
ankrd45	553808	ENSDARG00000011326	23.3491287528128	17.4226796388868	44.3736785158536	0	19.3457123224215	6.74116130121777	-1.70648	0.414063
ankrd46a	100329397	ENSDARG00000044328	20.4304876587112	19.3585329320965	17.3636133322905	74.8141779189376	17.4111410901794	13.4823226024355	0.887036	0.588446
ankrd46b	402888	ENSDARG00000015780	191.657431846005	145.188996990724	245.984522207449	72.8709525184457	118.008845166771	138.67531819648	-0.8225	0.241617
ankrd49	550246	ENSDARG00000023508	43.779616411524	64.8510853225232	62.7019370332714	75.7857906191836	88.022991067018	52.966267366711	0.339294	0.749478
ankrd52a	553206	ENSDARG00000112185	71.020266623139	83.2416916080149	22.1868392579268	100.076108125332	70.6118499768386	36.5948756351822	0.232345	0.877766
ankrd52b	564614		43.779616411524	41.6208458040075	13.5050325917815	24.2903175061486	9.67285616121077	15.4083686884978	-1.00239	0.499649
ankrd54	436851	ENSDARG00000055743	351.209811656893	356.197005950575	428.3024621965	313.83090217944	325.975252632803	460.32501456887	-0.0459036	0.957252
ankrd55	100006755	ENSDARG00000099182	81.7219506348448	35.8132859243785	148.555358509597	18.4606413046729	15.4765698579372	14.4453456454666	-2.45948	0.00796944
ankrd63	101885975		14.593205470508	15.4868263456772	2.89393555538176	36.9212826093458	1.93457123224215	6.74116130121777	0.467535	1
ankrd66	101886816	ENSDARG00000111486	1.94576072940107	2.90377993981447	8.68180666614527	0	0	0	-4.66401	1
ankrd6a	100330565	ENSDARG00000057790	74.9117880819411	22.262312871911	3.85858074050901	33.0348318083621	25.149426019148	8.66720738727999	-0.595752	0.784923
ankrd6b	378477	ENSDARG00000029370	32.1050520351176	31.9415793379592	3.85858074050901	3.88645080098377	9.67285616121077	18.2974378175911	-1.09152	0.597219
ankrd9	492328	ENSDARG00000028804	27.240650211615	48.3963323302412	67.5251629589077	6.8012889017216	37.724139028722	31.7797604200266	-0.907706	0.531641
anks1ab	100003659	ENSDARG00000078901	246.138732269235	121.958757472208	250.807748133086	458.601194516085	591.011511449978	577.813825818666	1.39481	0.00816013
anks1b	565408	ENSDARG00000003512	768.575488113422	556.557821797774	1148.89241548656	6115.33033534797	5426.47230643924	4100.55211722646	2.66051	2.33067e-09
anks3	100136846	ENSDARG00000038557	136.203251058075	171.323016449054	78.1362599953074	106.877397027054	158.634841043857	85.7090508297687	-0.134943	0.906596
anks4b	431735	ENSDARG00000036846	96.3151561053529	61.9473053827088	93.5705829573435	61.2116001154944	25.149426019148	78.967889528551	-0.607075	0.582041
anks6	449657		2.9186410941016	0	0	47.6090223120512	0	0	4.02897	1
ankzf1	553307	ENSDARG00000041904	238.355689351631	311.672380206753	380.070202940137	298.285098975505	242.78868964639	181.048332089849	-0.365202	0.619521
anln	562517	ENSDARG00000060917	369.694538586203	380.395172115696	199.681553321341	469.288934218791	394.652531377399	494.99384411799	0.516855	0.429765
ano1	407698	ENSDARG00000102335	214.033680234117	104.536077833321	249.843102947958	67.0412763169701	75.448278057444	186.826470348035	-0.787384	0.409245
ano10a	566425	ENSDARG00000057736	344.399649103989	644.639146638813	609.655757000423	444.027004012396	651.950505265606	778.122618769136	0.229302	0.782485
ano10b	565195	ENSDARG00000018159	254.89465555154	271.987387695956	297.110717019194	492.607639024693	518.465090240897	385.209217212444	0.760861	0.105244
ano11	100007289	ENSDARG00000077327	91.4507542818502	72.5944984953618	151.449294064979	104.934171626562	32.8877109481166	67.4116130121777	-0.620447	0.571897
ano2	566373	ENSDARG00000101363	102.152438293556	35.8132859243785	27.0100651835631	64.1264382162322	52.2334232705381	15.4083686884978	-0.324249	0.849591
ano3	553392	ENSDARG00000058015	168.308303093192	104.536077833321	103.217034808616	75.7857906191836	92.8594191476234	44.299059979431	-0.820511	0.318257
ano5a	100534737	ENSDARG00000015731	57.3999415173315	57.1076721496846	53.0554851819989	288.568971973045	194.424408840336	60.6704517109599	1.69797	0.0402083
ano5b	560102	ENSDARG00000036147	519.518114750085	394.914071814768	311.580394796103	1571.09773629769	1333.88686463096	1131.55207556155	1.71917	3.95356e-05
ano6	100535437	ENSDARG00000061544	35.9965734939198	53.2359655632653	52.0908399968716	49.5522477125431	124.779844479619	118.451834292826	1.05084	0.232726
ano8a	562947	ENSDARG00000076265	104.098199022957	50.3321856234509	50.1615496266171	2.91483810073783	24.1821404030269	52.0032443236799	-1.3707	0.350776
ano8b	562782	ENSDARG00000112701	102.152438293556	100.664371246902	109.969551104507	104.934171626562	86.0884198347758	101.117419518266	-0.0985335	0.918441
ano9a	100126106	ENSDARG00000078941	43.779616411524	64.8510853225232	41.4797429604719	31.0916064078702	126.714415711861	22.1495299897155	0.261605	0.876637
ano9b	559809	ENSDARG00000079324	64.2101040702352	60.0114520894991	162.060391101378	28.1767683071324	103.499560924955	68.3746360552088	-0.517071	0.693229
anos1a	30630	ENSDARG00000012896	475.738498338561	527.520022399629	655.958725886532	205.98189245214	334.680823177892	615.371724496879	-0.521288	0.520655
anos1b	30652	ENSDARG00000004932	322.023400715877	335.870546371874	240.196651096686	78.7006287199214	49.3315664221749	50.0771982376177	-2.33421	3.89466e-06
anp32a	335907	ENSDARG00000006487	1442.78158085089	1270.88768699213	1473.01319768931	1916.020244885	1947.14594525173	1834.55889697426	0.444578	0.303384
anp32b	322000	ENSDARG00000023330	1904.89975408365	2602.75475272037	2610.32987095435	3129.56450749218	3429.99479476534	3617.11454962485	0.515723	0.257817
anp32e	406562	ENSDARG00000054804	4223.27366316502	2529.19232757841	2156.94663394454	1870.35444797344	2069.02393288298	3638.30105657153	-0.233565	0.784104
anpepa	558452	ENSDARG00000111591	18.4847269293101	38.717065864193	65.5958725886532	24.2903175061486	21.2802835546637	20.2234839036533	-0.900431	0.491646
anpepb	322533	ENSDARG00000103878	25.2948894822139	22.262312871911	22.1868392579268	108.820622427546	17.4111410901794	30.8167373769955	1.17097	0.393195
antxr1a	793153	ENSDARG00000025672	46.6982575056256	36.7812125709833	32.7979362943266	36.9212826093458	0.967285616121077	0.963023043031109	-1.58189	0.464262
antxr1b	556289	ENSDARG00000074075	23.3491287528128	14.5188996990724	14.4696777769088	34.006444508608	4.83642808060538	1.92604608606222	-0.360665	1
antxr1c	563907	ENSDARG00000063612	37.9423342233208	95.8247380138776	9.64645185127252	55.3819239140188	115.106988318408	56.8183595388355	0.664499	0.667788
antxr1d	563132	ENSDARG00000060845	19.4576072940107	36.7812125709833	26.0454199984358	30.1199937076242	5.80371369672646	7.70418434424888	-0.915727	0.600856
antxr2a	557239	ENSDARG00000111517	958.287159230026	1715.16601778375	1645.68468582709	1967.51571799803	2276.99034034901	1455.12781802001	0.400116	0.542565
antxr2b	560841	ENSDARG00000112595	6.81016255290374	20.3264595787013	5.78787111076351	12.6309651031973	0	2.88906912909333	-1.08544	1
anxa11a	368215	ENSDARG00000077383	690.745058937379	1456.72960314026	1561.76055472102	3004.22646916046	2825.44128468966	2186.06230768062	1.1117	0.0372013
anxa11b	353365	ENSDARG00000002632	1542.98825841505	1411.23705074983	1542.46765101848	2985.76582785578	3420.32193860413	2752.31985698291	1.02623	0.00339663
anxa13	81880	ENSDARG00000013976	669.341690913967	553.65404185796	747.600018473621	4367.39908760551	5416.79945027803	1957.82584648225	2.57497	4.30822e-07
anxa13l	554118	ENSDARG00000013613	395.962308433117	359.10078589039	327.979362943266	336.177994285096	455.591525193027	301.426212468737	0.0134682	0.988572
anxa1a	334724	ENSDARG00000026726	715.067068054892	1283.470733398	1554.04339324	2499.95947773281	3067.26268871993	1672.77102574504	1.02711	0.0699299
anxa1b	353358	ENSDARG00000100095	217.92520169292	318.447866732987	953.069442905725	415.850235705264	374.339533438857	309.130396812986	-0.438192	0.679438
anxa1c	494158	ENSDARG00000104359	90.4778739171497	119.054977532393	308.686459240721	410.020559503788	236.984975949664	198.382746864409	0.705968	0.463254
anxa2a	325557	ENSDARG00000003216	1057.52095642948	2334.63907161084	2479.13812577704	5400.22338796695	6318.30964450287	3084.56280682864	1.33414	0.0219096
anxa2b	799806	ENSDARG00000116775	23.3491287528128	22.262312871911	245.984522207449	0	45.4624239576906	43.3360369363999	-1.7153	0.413467
anxa3a	447893	ENSDARG00000112919	35.9965734939198	72.5944984953618	274.923877761267	63.1548255159863	152.83112734713	79.9309125715821	-0.374148	0.812374
anxa3b	492336	ENSDARG00000109335	487.413062714968	504.289782881114	437.948914047773	1219.37393880866	1313.57386669242	853.238416125563	1.244	0.00242631
anxa4	353362	ENSDARG00000036456	744.253478995908	1427.69180374212	1527.03332805644	2409.59949660994	2348.56947594197	1910.63771737372	0.85029	0.109317
anxa5a	557578	ENSDARG00000026406	64.2101040702352	162.611676629611	116.722067400398	0	29.0185684836323	38.5209217212444	-2.34649	0.109585
anxa5b	337132	ENSDARG00000016470	1137.29714633492	1066.65516455852	1545.36158657386	1034.76752576193	972.122044201682	1078.58580819484	-0.281139	0.627407
anxa6	353363	ENSDARG00000013335	53.5084200585294	120.022904178998	88.7473570317072	20.4038667051648	23.2148547869058	31.7797604200266	-1.7984	0.0254691
aoc1	555401	ENSDARG00000061355	52.5355396938288	27.1019461049351	53.0554851819989	0	17.4111410901794	39.4839447642755	-1.22147	0.555283
aoc2	541429	ENSDARG00000111584	1087.6802477352	2300.76163897967	2523.51180429289	5596.48915341663	2943.45012985644	4411.60856012551	1.13141	0.0514543
aox5	64265	ENSDARG00000071475	29.186410941016	19.3585329320965	74.2776792547984	0	25.149426019148	0.963023043031109	-2.23377	0.317014
aox6	570457	ENSDARG00000020054	239.328569716331	267.147754462932	188.105811099814	196.265765449681	141.223699953677	120.377880378889	-0.601257	0.362805
ap1ar	100332265	ENSDARG00000031496	65.1829844349358	36.7812125709833	79.1009051804347	99.1044954250862	70.6118499768386	71.2637051843021	0.412341	0.697731
ap1b1	562166	ENSDARG00000020621	1229.72078098147	1154.73648939956	1399.70016361964	2562.14269054855	3265.55624002475	2791.80380174719	1.18763	0.000852923
ap1g1	324466	ENSDARG00000102394	1659.73390217911	2251.39738000282	2606.47129021384	3229.64061561752	3171.72953526101	2811.06426260781	0.499235	0.312595
ap1g2	100007877	ENSDARG00000054337	294.782750504262	292.313847274657	425.408526641118	173.918673344024	401.423530690247	432.397346320968	-0.00678792	0.995803
ap1m1	100330411	ENSDARG00000096249	895.049935524491	1012.45127234865	1227.99332066699	2377.53627750182	2241.20077255253	1530.24361537643	0.971642	0.0276194
ap1m2	403021	ENSDARG00000096454	176.091346010797	195.521182614175	268.171361465376	152.543193938613	65.7754218962332	220.532276854124	-0.54384	0.565581
ap1m3	445244	ENSDARG00000113914	17.5118465646096	15.4868263456772	15.434322962036	0	18.3784267063005	7.70418434424888	-0.892721	1
ap1s1	393279	ENSDARG00000056803	331.752204362882	214.879715546271	498.72156071079	422.651524606985	327.909823865045	202.234839036533	-0.133794	0.898666
ap1s2	327237	ENSDARG00000114515	651.829844349358	814.994236441262	873.968537725291	894.855296926514	1123.01860031657	1122.88486817427	0.424112	0.412096
ap1s3a	550415	ENSDARG00000110439	6.81016255290374	9.67926646604825	14.4696777769088	0	0	1.92604608606222	-4.00386	1
ap1s3b	447897	ENSDARG00000027966	102.152438293556	179.066429621893	301.93394294483	406.134108702804	878.295339437938	342.836203319075	1.48045	0.0420988
ap2a1	558153	ENSDARG00000054320	1124.64970159382	1413.17290404304	1675.58868656604	2184.18535015288	3023.73483599449	1798.92704438211	0.733769	0.145744
ap2b1	334632	ENSDARG00000035152	1398.02908407467	1205.06867502301	1495.20003694724	667.497925068963	1181.05573728383	1466.68409453638	-0.305899	0.676015
ap2m1a	321051	ENSDARG00000002790	2669.58372073827	2899.90823322805	3641.53557385538	6276.61804358879	8095.21332131729	5614.42434087137	1.11757	0.00490512
ap2m1b	394001	ENSDARG00000033899	1838.74388928401	2111.04801624512	3781.40912569883	2366.84853779912	3424.19108106861	2707.05777396045	0.136444	0.870311
ap2s1	100148085	ENSDARG00000026967	1041.95487059427	1285.40658669121	2013.21450136058	2943.98648174521	3183.33696265446	1935.67631649253	0.89342	0.0989965
ap3b1	563316	ENSDARG00000100082	280.189545033754	499.450149648089	345.342976275556	833.643696811019	1377.41471735641	1004.43303388145	1.51513	0.00158593
ap3b2	100000165	ENSDARG00000105296	171.226944187294	115.183270945974	227.656263690032	42.7509588108215	27.0839972513901	142.527410368604	-1.27531	0.204003
ap3d1	563359	ENSDARG00000114974	275.325143210251	311.672380206753	304.827878500212	664.583086968225	679.034502516996	336.095042017857	0.913356	0.10291
ap3m1	266798	ENSDARG00000029928	143.986293975679	178.098502975288	205.469424432105	116.593524029513	283.414685523475	212.828092509875	0.216189	0.825078
ap3m2	415244	ENSDARG00000016128	431.958881927037	390.074438581744	654.029435516277	131.167714533202	189.587980759731	337.058065060888	-1.16596	0.0691361
ap3s1	449791		110.908361575861	154.868263456772	158.201810360869	196.265765449681	276.643686210628	154.083686884978	0.564407	0.431713
ap3s2	436812	ENSDARG00000039882	296.728511233663	267.147754462932	393.575235531919	244.846400461978	295.022112916928	364.022710265759	-0.0830394	0.922528
ap4b1	393309	ENSDARG00000013726	107.016840117059	93.888884720668	62.7019370332714	149.628355837875	154.765698579372	83.7830047437065	0.558339	0.520718
ap4e1	570467	ENSDARG00000103684	125.501567046369	146.156923637329	127.333164436797	122.423200230989	180.882410214641	192.604608606222	0.313761	0.694328
ap4m1	436945	ENSDARG00000056871	92.4236346465507	78.4020583749908	100.323099253234	143.7986796364	88.022991067018	92.4502121309865	0.258053	0.787655
ap4s1	368852	ENSDARG00000054220	81.7219506348448	131.638023938256	223.797682949523	153.514806638859	277.610971826749	160.824848186195	0.43726	0.655675
ap5b1	100148772	ENSDARG00000078805	137.176131422775	114.215344299369	123.474583696288	81.6154668206592	110.270560237803	86.6720738727998	-0.428371	0.581194
ap5m1	553681	ENSDARG00000031533	64.2101040702352	71.626571848757	119.616002955779	92.3032065233646	115.106988318408	110.747649948578	0.316624	0.743625
ap5s1	556111	ENSDARG00000076755	79.7761899054438	109.375711066345	107.075615549125	114.650298629021	163.471269124462	228.236461198373	0.773469	0.280961
ap5z1	100537934	ENSDARG00000078111	80.7490702701443	93.888884720668	84.8887762911982	114.650298629021	107.36870338944	77.0418434424888	0.204494	0.83124
apaf1	58131	ENSDARG00000021239	87.559232823048	89.0492514876439	66.5605177737804	281.767683071324	186.686123911368	233.051576413528	1.52853	0.00336274
apba1a	100003938	ENSDARG00000103848	105.071079387658	61.9473053827088	75.2423244399257	34.006444508608	24.1821404030269	21.1865069466844	-1.6099	0.0405704
apba1b	565507	ENSDARG00000074328	789.005975772133	437.502844265381	399.363106642683	90.3599811228727	142.190985569798	229.199484241404	-1.81594	0.00314033
apba2a	100330365	ENSDARG00000063314	132.311729599273	115.183270945974	166.883617027015	1.94322540049189	52.2334232705381	93.4132351740176	-1.48922	0.292779
apba2b	327160	ENSDARG00000060639	640.155279972951	245.853368237625	761.105051065402	66.0696636167241	110.270560237803	205.123908165626	-2.11024	0.00353819
apbb1	565164	ENSDARG00000076560	115.772763399364	100.664371246902	110.934196289634	86.4735303218889	128.648986944103	109.784626905546	-0.0108611	0.993203
apbb1ip	393607	ENSDARG00000016505	43.779616411524	52.2680389166605	42.4443881455991	82.5870795209052	46.4297095738117	77.0418434424888	0.573241	0.562464
apbb2b	564990	ENSDARG00000113966	79.7761899054438	98.7285179536921	84.8887762911982	278.852844970586	358.862963580919	171.418101659537	1.61912	0.00396846
apbb3	101883158	ENSDARG00000053771	74.9117880819411	67.7548652623377	71.3837436994167	6.8012889017216	5.80371369672646	67.4116130121777	-1.4193	0.349832
apc	386762	ENSDARG00000058868	2779.51920194943	1844.8681884288	3000.04652574575	5067.93184448284	5297.82331949514	5369.81648794147	1.04533	0.010264
apc2	565771	ENSDARG00000063007	260.731937739743	89.0492514876439	139.873551843452	90.3599811228727	43.5278527254484	75.1157973564265	-1.22822	0.136629
apcdd1l	100001408	ENSDARG00000116773	97.2880364700534	41.6208458040075	34.7272266645811	22.3470921056567	7.73828492896861	22.1495299897155	-1.73289	0.123088
apeh	100333019	ENSDARG00000008703	201.386235493011	298.121407154286	183.282585174178	308.97283867821	274.709114978386	413.136885460346	0.545908	0.402107
apela	100536023	ENSDARG00000113515	21.4033680234117	24.1981661651206	37.6211622199628	6.8012889017216	0.967285616121077	19.2604608606222	-1.62216	0.365723
apex1	406730	ENSDARG00000045843	590.538381373224	639.799513405789	962.715894756998	537.301823236007	615.193651853005	919.68700609471	-0.0817862	0.926668
apex2	393115	ENSDARG00000008472	190.684551481305	197.457035907384	194.858327395705	164.202546341564	184.751552679126	229.199484241404	-0.0120083	0.991025
aph1b	386808	ENSDARG00000111794	528.27403803239	560.429528384193	721.554598475185	339.092832385834	619.062794317489	980.357457805669	0.098771	0.922792
api5	321676	ENSDARG00000033597	890.185533700989	979.541766364082	930.882603647799	999.789468553075	795.108776451525	1175.85113554098	0.0850899	0.903971
apip	447941	ENSDARG00000003132	198.467594398909	334.902619725269	440.842849603154	261.363816366159	501.053949150718	343.799226362106	0.183303	0.849656
apitd1	569270	ENSDARG00000111281	101.179557928856	119.054977532393	205.469424432105	278.852844970586	244.723260878632	142.527410368604	0.645804	0.420576
apln	798375	ENSDARG00000053279	1840.68965001341	2168.15568839481	2296.82018578799	3028.5167866666	2800.29185867052	1956.86282343921	0.304166	0.603919
aplnr2	793710	ENSDARG00000004447	62.2643433408342	36.7812125709833	66.5605177737804	53.4386985135269	15.4765698579372	16.3713917315289	-0.957594	0.449048
aplnra	561935	ENSDARG00000002172	341.481008009887	542.038922098702	372.353041459119	3536.67022889523	3799.49790012359	2344.96110978075	2.94648	2.5406e-12
aplnrb	565492	ENSDARG00000036670	111.881241940561	119.054977532393	129.262454807052	1249.49393251628	1475.11056458464	703.969844455741	3.25072	1.85322e-12
aplp1	404233	ENSDARG00000098368	2032.34708185942	895.332148109463	2087.49218061537	199.180603550418	289.218399220202	338.021088103919	-2.60132	5.52662e-07
aplp2	796801	ENSDARG00000054864	2584.94312900932	2439.17514944416	2570.77941836413	4662.76934848028	6930.60143950751	6281.79930969193	1.23486	0.000791462
apmap	266637	ENSDARG00000017422	328.83356326878	309.736526913544	274.923877761267	44.6941842113134	154.765698579372	347.65131853423	-0.73949	0.502924
apnl	100002992	ENSDARG00000090900	14.593205470508	17.4226796388868	36.6565170348356	0	6.77099931284754	6.74116130121777	-2.34497	1
apoa1a	30355	ENSDARG00000110395	15.5660858352085	145.188996990724	1168.1853191891	84.5303049213971	27.0839972513901	291.795982038426	-1.71993	0.545476
apoa1b	100101640	ENSDARG00000101324	595.402783196727	1387.03888458471	4242.50952418966	615.030839255682	1178.15388043547	7475.9478830505	0.57438	0.829227
apoa1bp	436891	ENSDARG00000058806	185.820149657802	181.002282915102	178.459359248542	136.025778034432	259.232545120449	363.059687222728	0.475853	0.567751
apoa2	322327	ENSDARG00000015866	286.999707586658	620.440980473693	2229.29502282908	222.499308356321	649.048648417242	3776.97637476801	0.567516	0.836007
apoa4a	550608	ENSDARG00000101160	16.5389661999091	48.3963323302412	20.2575488876723	0	8.70557054508969	52.0032443236799	-0.488626	0.862508
apoa4b.1	322543	ENSDARG00000040298	27.240650211615	110.34363771295	683.933436255222	49.5522477125431	19.3457123224215	295.648074210551	-1.17216	0.521666
apoa4b.2	570354	ENSDARG00000020866	21.4033680234117	74.5303517885715	448.560011084172	24.2903175061486	1.93457123224215	143.490433411635	-1.68174	0.38411
apoa4b.3	100004607	ENSDARG00000094929	6.81016255290374	10.6471931126531	115.75742221527	0	0.967285616121077	28.8906912909333	-2.15727	0.408639
apoba	566465	ENSDARG00000042780	145.93205470508	93.888884720668	142.767487398833	59.2683747150025	56.1025657350224	59.7074286679288	-1.12778	0.0796232
apobb.1	321166	ENSDARG00000022767	160.525260175588	178.098502975288	670.42840366344	68.012889017216	124.779844479619	297.574120296613	-1.04104	0.352437
apobb.2	100330435	ENSDARG00000075016	55.4541807879304	45.4925523904268	30.8686459240721	30.1199937076242	36.7568534126009	25.0385991188088	-0.520089	0.66958
apobec2a	503736	ENSDARG00000018881	24.3220091175133	19.3585329320965	13.5050325917815	79.6722414201673	4.83642808060538	12.5192995594044	0.762657	0.716927
apobec2b	567047	ENSDARG00000113181	9.72880364700534	26.1340194583303	17.3636133322905	33.0348318083621	34.8222821803588	18.2974378175911	0.694586	0.650843
apoc1	570638	ENSDARG00000092170	207.223517681214	540.103068805492	1697.77552582396	11.6593524029513	275.676400594507	634.632185357501	-1.40709	0.58734
apoc2	568972	ENSDARG00000092155	24.3220091175133	53.2359655632653	328.944008128393	2.91483810073783	32.8877109481166	119.414857335858	-1.3889	0.459574
apoc4	570390	ENSDARG00000075614	0	0	7.71716148101802	0	0	10.5932534733422	0.456958	1
apoda.1	767642	ENSDARG00000060345	29.186410941016	57.1076721496846	93.5705829573435	137.969003434924	589.076940217736	41.4099908503377	2.09497	0.0724116
apoda.2	100148022	ENSDARG00000060350	29.186410941016	10.6471931126531	102.252389623489	18.4606413046729	5.80371369672646	78.967889528551	-0.46081	0.838228
apodb	567972	ENSDARG00000057437	39.8880949527219	62.9152320293136	305.792523685339	119.508362130251	106.401417773318	122.303926464951	-0.230769	0.885597
apoea	553587	ENSDARG00000102004	12.6474447411069	31.9415793379592	152.413939250106	12.6309651031973	1.93457123224215	84.7460277867376	-0.988105	0.660384
apoeb	30314	ENSDARG00000040295	3313.63052217002	7883.7625365963	12777.6901221956	3306.39801893694	5282.3467496372	6146.01306062454	-0.702311	0.386305
apof	793418	ENSDARG00000090980	171.226944187294	287.474214041633	753.387889584384	472.203772319528	390.783388912915	260.0162216184	-0.110176	0.933822
apol1	560340	ENSDARG00000007425	110.908361575861	131.638023938256	168.812907397269	148.656743137629	191.522551991973	149.268571669822	0.250709	0.762123
apom	569714	ENSDARG00000076838	8.7559232823048	22.262312871911	58.8433562927624	34.006444508608	38.6914246448431	129.045087766169	1.16663	0.422562
apooa	641319	ENSDARG00000104696	57.3999415173315	145.188996990724	102.252389623489	90.3599811228727	107.36870338944	148.305548626791	0.182851	0.873089
apoob	449837	ENSDARG00000109942	345.37252946869	197.457035907384	348.236911830938	201.12382895091	202.162693769305	267.720405962648	-0.409178	0.578393
apool	541537	ENSDARG00000111985	83.6677113642459	121.958757472208	143.732132583961	115.621911329267	122.845273247377	195.493677735315	0.312851	0.735935
apopt1	798687	ENSDARG00000092473	134.257490328674	195.521182614175	217.045166653632	227.357371857551	215.704692395	135.786249067386	0.0820334	0.93542
appa	58083	ENSDARG00000104279	5909.27533519104	4780.58970758123	6050.25460111813	16765.1771427437	18288.4691440012	9345.17560957389	1.40721	0.00162907
appb	170846	ENSDARG00000109552	3323.35932581702	3338.37900414004	5038.34180191964	5964.73036680984	6655.89232452913	4136.18396981861	0.518226	0.357953
appbp2	322995	ENSDARG00000007566	281.162425398454	190.68154938115	84.8887762911982	102.019333525824	153.798412963251	192.604608606222	-0.312033	0.778123
appl1	571540	ENSDARG00000060734	99.2337971994545	53.2359655632653	28.9393555538176	110.763847828038	55.1352801189014	78.967889528551	0.432851	0.730608
appl2	100000135	ENSDARG00000078139	32.1050520351176	78.4020583749908	80.0655503655619	44.6941842113134	85.1211342186547	52.966267366711	-0.0602935	0.96837
aprt	393641	ENSDARG00000003519	105.071079387658	233.270321831763	211.257295542868	282.739295771569	229.246691020695	460.32501456887	0.82302	0.263503
aptx	405797	ENSDARG00000027143	71.9931469878395	40.6529191574026	36.6565170348356	22.3470921056567	45.4624239576906	37.5578986782133	-0.50263	0.692609
aqp10a	436621	ENSDARG00000112181	13.6203251058075	14.5188996990724	11.575742221527	0	0	36.5948756351822	-0.1178	1
aqp10b	100034395	ENSDARG00000058678	21.4033680234117	7.7434131728386	1.9292903702545	16.517415904181	0	6.74116130121777	-0.418016	1
aqp11	553476	ENSDARG00000100555	283.108186127855	233.270321831763	264.312780724867	288.568971973045	146.060128034283	137.712295153449	-0.447931	0.575438
aqp12	436844	ENSDARG00000043279	31.1321716704171	33.8774326311689	68.4898081440349	37.8928953095918	28.0512828675112	99.1913734322043	0.306837	0.843513
aqp1a.1	335821	ENSDARG00000023713	912.561782089101	623.344760413507	1713.209848786	29545.7706017789	31176.5826931984	13945.5366861335	4.52236	1.77459e-14
aqp1a.2	559284	ENSDARG00000091027	8.7559232823048	40.6529191574026	104.181679993743	219.584470255583	237.952261565785	160.824848186195	2.00917	0.0470828
aqp3a	406777	ENSDARG00000003808	1048.76503314718	2287.2106659272	3706.1668012589	1298.07456752858	1228.45273247377	1480.16641713882	-0.813606	0.247488
aqp3b	568049	ENSDARG00000069518	0.972880364700534	4.83963323302412	5.78787111076351	0	35.7895677964798	33.7058065060888	2.58245	1
aqp4	445293	ENSDARG00000010565	69.0745058937379	67.7548652623377	22.1868392579268	50.523860412789	27.0839972513901	26.00162216184	-0.618045	0.644859
aqp7	334529	ENSDARG00000026787	29.186410941016	7.7434131728386	14.4696777769088	273.02316876911	212.802835546637	85.7090508297687	3.4753	3.46444e-05
aqp8a.1	447923	ENSDARG00000115150	27.240650211615	61.9473053827088	150.484648879851	4298.41458588805	4408.88783827987	2962.25888036369	5.60537	2.23789e-15
aqp8a.2	563130	ENSDARG00000113224	3.89152145880214	22.262312871911	60.7726466630169	24.2903175061486	22.2475691707848	16.3713917315289	-0.466753	0.82513
aqp8b	555598	ENSDARG00000089749	18.4847269293101	9.67926646604825	19.292903702545	13.6025778034432	4.83642808060538	9.63023043031109	-0.757744	1
aqp9a	606660		82.6948309995454	130.670097291651	178.459359248542	127.281263732219	39.6587102609641	391.950378513662	0.512372	0.723068
aqp9b	570191	ENSDARG00000053480	131.338849234572	30.9736526913544	3.85858074050901	0	0.967285616121077	0.963023043031109	-6.42566	0.00107196
aqr	393436	ENSDARG00000016775	214.033680234117	382.331025408906	202.575488876723	308.97283867821	412.063672467579	408.32177024519	0.499354	0.47719
ar	100005148	ENSDARG00000114287	198.467594398909	198.424962553989	218.974457023886	327.433479982883	145.092842418161	109.784626905546	-0.0808986	0.947212
araf	403063	ENSDARG00000054533	769.548368478122	838.224475959778	811.266600692019	466.374096118053	612.291795004641	1052.584186033	-0.182714	0.825782
arap1	101883993		3.89152145880214	7.7434131728386	0	14.5741905036891	0.967285616121077	20.2234839036533	1.62032	1
arap3	558931	ENSDARG00000076801	198.467594398909	164.54752992282	113.828131845016	3428.82121916793	3282.00009549881	1385.79015892177	4.08577	2.88281e-14
arcn1a	266982	ENSDARG00000002792	313.267477433572	301.993113740705	461.100398490827	284.682521172061	368.53581974213	403.506655030035	-0.0265626	0.977097
arcn1b	399661	ENSDARG00000031214	638.20951924355	603.986227481411	693.579888106495	637.377931361339	766.090207967893	807.01331006007	0.191456	0.752332
areg	101884611	ENSDARG00000076853	11.6745643764064	4.83963323302412	21.2221940727996	31.0916064078702	23.2148547869058	0	0.524956	1
arel1	100332031	ENSDARG00000100359	39.8880949527219	36.7812125709833	48.2322592563626	87.4451430221349	30.9531397158744	26.9646452048711	0.218692	0.887699
arf1	114428	ENSDARG00000009484	791.924616866235	1259.27256723288	1007.08957327285	2903.17874833488	2987.94526819801	2005.9769986338	1.36859	0.00135731
arf2a	399477	ENSDARG00000014763	3049.00706297147	3476.79251460453	4326.43365529573	4885.2686568366	5547.38300845437	6158.53236018394	0.612424	0.163746
arf2b	327026	ENSDARG00000016393	1262.79871338129	1615.46957318345	1374.61938880633	2598.09236045765	3820.77818367825	2575.12361706519	1.08052	0.00890966
arf3a	445047	ENSDARG00000070539	97.2880364700534	60.0114520894991	191.964391840323	15.5458032039351	30.9531397158744	14.4453456454666	-2.51881	0.00356313
arf3b	368822	ENSDARG00000112366	29.186410941016	10.6471931126531	5.78787111076351	0	3.86914246448431	12.5192995594044	-1.47636	1
arf4a	445196	ENSDARG00000045989	47.6711378703262	53.2359655632653	35.6918718497083	20.4038667051648	19.3457123224215	62.5964977970221	-0.41627	0.78036
arf4b	550402	ENSDARG00000100339	39.8880949527219	161.643749983006	12.5403874066543	55.3819239140188	113.172417086166	130.0081108092	0.479975	0.777299
arf5	378724	ENSDARG00000115687	1840.68965001341	2486.60355512779	2184.92134431323	2580.60333185322	3817.87632682989	2937.22028124488	0.519609	0.294071
arf6a	336063	ENSDARG00000101626	629.453595961245	1021.16261216809	843.099891801219	4119.6378490428	3920.40860213872	2305.47716501648	2.05263	3.4464e-06
arf6b	100003206	ENSDARG00000052928	657.667126537561	969.862499898034	1164.32673844859	2363.93369969838	2646.49344570727	2142.72627074422	1.35734	0.0012912
arfgap1	100149572	ENSDARG00000101616	270.460741386748	392.010291874954	514.155883672826	604.343099552977	902.477479840964	483.437567601617	0.758269	0.223865
arfgap2	641490	ENSDARG00000067601	960.232919959427	1099.56467054308	763.998986620784	1652.71320311835	1653.09111795092	1384.82713587874	0.732148	0.0908026
arfgap3	402889	ENSDARG00000097583	127.44732777577	143.253143697514	188.105811099814	57.3251493145106	106.401417773318	233.051576413528	-0.209486	0.866051
arfgef1	100329953	ENSDARG00000063474	770.521248842823	790.796070276142	914.483635500635	660.696636167241	980.827614746772	1164.29485902461	0.180536	0.803187
arfgef2	100334572	ENSDARG00000074702	676.151853466871	597.210740955177	565.28207848457	178.776736845254	439.147669718969	861.905623512843	-0.313178	0.770709
arfgef3	562652	ENSDARG00000077656	148.850695799182	89.0492514876439	127.333164436797	67.0412763169701	47.3969951899328	60.6704517109599	-1.06057	0.125639
arfip1	100003895	ENSDARG00000116473	328.83356326878	368.780052356438	464.958979231336	644.17922026306	812.519917541704	634.632185357501	0.847079	0.0635881
arfip2a	449664	ENSDARG00000059244	456.28089104455	238.109955064787	208.363359987487	102.99094622607	144.12555680204	260.979244661431	-0.829143	0.309159
arfip2b	550342	ENSDARG00000109805	49.6168985997272	50.3321856234509	53.0554851819989	55.3819239140188	31.9204253319955	64.5225438830843	-0.0111457	0.994673
arfrp1	503602	ENSDARG00000057857	77.8304291760427	53.2359655632653	56.9140659225079	68.012889017216	51.2661376544171	76.0788203994576	0.0556157	0.964932
arg1	570368	ENSDARG00000110741	8.7559232823048	9.67926646604825	1.9292903702545	10.6877397027054	0	4.81511521515555	-0.393603	1
arg2	322614	ENSDARG00000039269	492.27746453847	945.664333732914	236.338070356177	2532.02269684093	1526.37670223906	2359.40645542622	1.93855	0.00252474
arglu1a	406834	ENSDARG00000019223	1464.1849488743	1315.41231273596	1908.06817618171	1613.84869510851	2001.31393975451	1999.23583733258	0.260261	0.661737
arglu1b	393131	ENSDARG00000018319	935.910910841914	602.050374188201	1035.06428364154	223.470921056567	487.511950525023	499.808959333146	-1.08749	0.0692818
arhgap1	550478	ENSDARG00000024324	112.854122305262	123.894610765418	142.767487398833	112.707073228529	130.583558176345	167.566009487413	0.114493	0.903481
arhgap10	692277	ENSDARG00000078326	303.538673786567	306.832746973729	322.191491832502	451.799905614364	650.015934033363	580.702894947759	0.851356	0.0580854
arhgap11a	406608	ENSDARG00000100019	274.352262845551	340.710179604898	200.646198506468	271.079943368618	139.289128721435	320.686673329359	-0.15805	0.873565
arhgap12a	563267	ENSDARG00000008548	340.508127645187	437.502844265381	299.040007389448	302.171549776488	319.204253319955	269.646452048711	-0.273557	0.683827
arhgap12b	393848	ENSDARG00000109973	812.355104524946	613.665493947459	576.857820706097	186.549638447221	363.699391661525	447.805715009466	-1.00484	0.0900265
arhgap15	100003547	ENSDARG00000062349	32.1050520351176	48.3963323302412	92.6059377722162	125.338038331727	55.1352801189014	157.935779057102	0.967002	0.344245
arhgap17a	550254	ENSDARG00000113457	60.3185826114331	69.6907185555474	62.7019370332714	457.629581815839	538.77808817944	98.2283503891732	2.50591	0.00113579
arhgap17b	100141341	ENSDARG00000062263	149.823576163882	188.745696087941	273.95923257614	712.192109280276	790.27234837092	535.440811925297	1.73418	0.000250823
arhgap18	100004252	ENSDARG00000074740	40.8609753174224	45.4925523904268	21.2221940727996	55.3819239140188	36.7568534126009	93.4132351740176	0.786623	0.493635
arhgap19	100537002	ENSDARG00000083189	106.043959752358	115.183270945974	127.333164436797	135.054165334186	190.555266375852	113.636719077671	0.333583	0.68877
arhgap20	796434	ENSDARG00000089326	322.996281080577	182.938136208312	143.732132583961	146.713517737137	70.6118499768386	139.638341239511	-0.863884	0.27601
arhgap20b	100002649		45.7253771409251	36.7812125709833	23.1514844430541	102.99094622607	99.6304184604709	50.0771982376177	1.25809	0.15131
arhgap21b	326745	ENSDARG00000075673	740.361957537106	872.101908590947	1053.39254215896	739.397264887163	790.27234837092	768.492388338825	-0.214128	0.726762
arhgap22	562503	ENSDARG00000021255	139.121892152176	107.439857773136	188.105811099814	69.9561144177079	102.532275308834	99.1913734322043	-0.677983	0.366019
arhgap23a	100006233	ENSDARG00000052950	1021.52438293556	1346.38596542731	1586.84132953433	1032.82430036144	1247.79844479619	1329.93482242596	-0.131368	0.851583
arhgap23b	562244	ENSDARG00000026840	161.498140540289	109.375711066345	22.1868392579268	2.91483810073783	65.7754218962332	70.300682141271	-1.07607	0.537795
arhgap24	100005116	ENSDARG00000100973	172.199824551995	172.290943095659	190.035101470069	129.22448913271	223.442977323969	146.379502540729	-0.0990813	0.915607
arhgap25	562468	ENSDARG00000061784	18.4847269293101	31.9415793379592	45.3383237009809	5.82967620147566	51.2661376544171	82.8199817006754	0.547032	0.768618
arhgap27	564211	ENSDARG00000104255	30.1592913057166	40.6529191574026	13.5050325917815	69.9561144177079	24.1821404030269	26.9646452048711	0.52229	0.739973
arhgap27l	566523	ENSDARG00000061798	116.745643764064	249.725074824045	430.231752566755	2770.06780840118	3277.16366741821	1803.74215959727	3.30071	4.07359e-08
arhgap28	492794		29.186410941016	30.9736526913544	9.64645185127252	34.006444508608	51.2661376544171	33.7058065060888	0.769423	0.574691
arhgap29a	564805	ENSDARG00000026329	190.684551481305	154.868263456772	171.706842952651	3631.88827351934	2956.02484286601	2535.63967230091	4.14065	1.08278e-28
arhgap29b	378998	ENSDARG00000017748	387.206385150812	506.225636174323	662.711242182422	1576.92741249917	2057.41650548953	852.275393082532	1.52763	0.00487124
arhgap31	101885883	ENSDARG00000059472	160.525260175588	156.804116749982	44.3736785158536	954.123671641516	1036.93018048179	548.923134527732	2.81201	1.46135e-05
arhgap32a	562449	ENSDARG00000075334	247.111612633936	188.745696087941	333.767234054029	56.3535366142647	96.7285616121077	89.5611430018932	-1.66526	0.00359283
arhgap32b	569434	ENSDARG00000074184	1220.96485769917	1024.0663921079	1218.34686881572	89.3883684226268	249.559688959238	501.735005419208	-2.04249	0.0038944
arhgap33	569720	ENSDARG00000011333	637.23663887885	767.565830757626	660.781951812168	250.676076663453	329.844395097287	673.153107078746	-0.720353	0.298484
arhgap35	564565	ENSDARG00000113130	946.612594853619	641.735366698999	1173.00854511474	586.85407094855	802.847061380494	1014.06326431176	-0.200072	0.803905
arhgap39	101884459	ENSDARG00000100007	70.0473862584384	30.9736526913544	30.8686459240721	3.88645080098377	18.3784267063005	16.3713917315289	-1.77094	0.16754
arhgap42a	566275	ENSDARG00000116136	439.741924844641	354.261152657366	366.565170348356	808.381766604625	720.627784010202	370.763871566977	0.710986	0.248038
arhgap44	100333556	ENSDARG00000104549	19.4576072940107	29.0377993981447	26.0454199984358	3.88645080098377	1.93457123224215	25.0385991188088	-1.27189	0.519216
arhgap4a	393416	ENSDARG00000039265	34.0508127645187	81.3058383148053	103.217034808616	136.025778034432	28.0512828675112	189.715539477129	0.694738	0.608103
arhgap4b	561231	ENSDARG00000015003	347.318290198091	387.17065864193	487.145818489262	1076.54687187251	613.259080620763	1241.3367024671	1.26264	0.0121745
arhgap5	795752	ENSDARG00000061294	871.700806771678	1102.4684504829	1106.44802734096	1101.8088020789	1127.85502839718	1175.85113554098	0.144648	0.814286
arhgap6	559813	ENSDARG00000059672	116.745643764064	198.424962553989	97.4291636978525	183.634800346483	203.129979385426	155.046709928009	0.393041	0.642613
arhgap9	100334461		29.186410941016	31.9415793379592	8.68180666614527	42.7509588108215	31.9204253319955	71.2637051843021	1.06404	0.403188
arhgdia	406770	ENSDARG00000043795	1461.2663077802	3205.77305355518	3935.75235531919	8718.28075930685	12477.0171623458	9623.48926900988	1.84093	0.000370963
arhgdig	394132	ENSDARG00000004034	717.985709148994	1130.53832323443	1974.62869395549	5200.07117171629	4818.04965389908	4739.99941779912	1.94866	0.000112236
arhgef10	334278	ENSDARG00000115629	125.501567046369	105.504004479926	80.0655503655619	241.93156236124	297.923969765292	312.019465942079	1.45349	0.00352442
arhgef10la	799435	ENSDARG00000088630	108.96260084646	69.6907185555474	90.6766474019617	2.91483810073783	45.4624239576906	31.7797604200266	-1.74829	0.153275
arhgef10lb	567649	ENSDARG00000074244	85.613472093647	78.4020583749908	80.0655503655619	27.2051556068864	23.2148547869058	20.2234839036533	-1.78883	0.0117123
arhgef11	565268		105.071079387658	98.7285179536921	93.5705829573435	204.038667051648	144.12555680204	90.5241660449243	0.560884	0.49798
arhgef12a	562455	ENSDARG00000030532	373.586060045005	549.78233527154	384.893428865774	573.251493145106	653.885076497848	651.966600132061	0.522394	0.328179
arhgef12b	571031	ENSDARG00000100913	651.829844349358	848.871669072431	738.918211807475	2540.76721114314	3609.90991936386	2541.4178105591	1.95645	1.49375e-07
arhgef15	101882903	ENSDARG00000100293	48.6440182350267	30.9736526913544	20.2575488876723	0	0	0.963023043031109	-6.58587	0.000238731
arhgef16	567180	ENSDARG00000077114	82.6948309995454	192.61740267436	238.267360726431	86.4735303218889	112.205131470045	137.712295153449	-0.610461	0.502877
arhgef18a	407987	ENSDARG00000011157	168.308303093192	231.334468538553	272.029942205885	112.707073228529	134.45270064083	162.750894272257	-0.712438	0.25949
arhgef18b	562264	ENSDARG00000042308	299.647152327764	321.351646672802	288.428910353048	223.470921056567	233.115833485179	283.128774651146	-0.297962	0.639281
arhgef19	569202	ENSDARG00000078853	87.559232823048	157.772043396586	165.918971841887	67.0412763169701	83.1865629864126	64.5225438830843	-0.937413	0.19038
arhgef1a	368266	ENSDARG00000040380	240.301450081032	303.928967033915	331.837943683775	2462.06658242322	2054.51464864117	1588.0249979583	2.80075	6.28266e-13
arhgef1b	557983	ENSDARG00000055837	1946.73360976577	1740.33211059547	1470.11926213393	3160.65611390005	3195.91167566404	3090.34094508683	0.873264	0.0182431
arhgef2	561276	ENSDARG00000116451	107.016840117059	84.2096182546197	39.5504525902173	69.9561144177079	96.7285616121077	98.2283503891732	0.199153	0.868447
arhgef25a	100331456	ENSDARG00000100606	552.596047149903	713.361938547756	541.165948856389	2889.57617053143	3084.67382981011	1701.66171703597	2.08664	8.72518e-07
arhgef25b	569561	ENSDARG00000114202	285.053946857256	148.092776930538	226.691618504904	109.792235127792	66.7427075123543	159.861825143164	-0.971885	0.188443
arhgef28	559941	ENSDARG00000112290	105.071079387658	98.7285179536921	36.6565170348356	128.252876432464	72.5464212090807	33.7058065060888	-0.0361893	0.982968
arhgef3	570228	ENSDARG00000013834	70.0473862584384	36.7812125709833	22.1868392579268	544.103112137728	485.57737929278	241.718783800808	3.30102	7.55954e-07
arhgef33	559216	ENSDARG00000097964	65.1829844349358	58.0755987962895	207.398714802359	65.0980509164782	60.9389938156278	27.9276682479022	-1.10289	0.306611
arhgef37	101883655	ENSDARG00000115787	50.5897789644278	60.0114520894991	29.9040007389448	10.6877397027054	28.0512828675112	36.5948756351822	-0.898999	0.482789
arhgef38	100317614	ENSDARG00000079377	72.96602735254	48.3963323302412	127.333164436797	42.7509588108215	29.0185684836323	57.7813825818666	-0.940851	0.345138
arhgef39	492469	ENSDARG00000114412	81.7219506348448	90.9851047808535	67.5251629589077	234.158660759272	189.587980759731	163.713917315289	1.29006	0.0180552
arhgef3l	553761	ENSDARG00000037554	28.2135305763155	40.6529191574026	110.934196289634	205.98189245214	76.415563673565	276.387613349928	1.63578	0.0878594
arhgef4	559017	ENSDARG00000012914	1251.12414900489	1336.70669896126	1813.53294803923	493.579251724939	650.983219649485	780.048664855199	-1.19337	0.00680411
arhgef40	100151026	ENSDARG00000078979	89.5049935524491	90.9851047808535	27.0100651835631	42.7509588108215	84.1538486025337	35.631852592151	-0.352289	0.806736
arhgef5	100537160		183.874388928401	340.710179604898	608.691111815296	107.8490097273	219.573834859484	213.791115552906	-1.06622	0.174172
arhgef6	558288	ENSDARG00000006683	524.382516573588	746.27144453232	845.9938273566	493.579251724939	437.213098486727	640.410323615688	-0.429914	0.488179
arhgef7a	553493	ENSDARG00000114088	828.894070724855	458.797230490687	783.291890323329	159.344482840335	180.882410214641	423.730138933688	-1.4387	0.0263608
arhgef7b	494081	ENSDARG00000073848	791.924616866235	700.778892141893	757.246470324893	3304.45479353645	4172.87014794632	3419.69482580347	2.27597	3.0941e-12
arhgef9a	559868	ENSDARG00000061746	205.277756951813	115.183270945974	275.888522946394	71.8993398181998	80.2847061380494	193.567631649253	-0.786351	0.398105
arhgef9b	560923	ENSDARG00000110276	171.226944187294	128.734243998442	341.484395535047	5322.49437194728	5120.81005174498	2872.6977373618	4.37564	5.91633e-15
arid1aa	100141358	ENSDARG00000101710	1950.62513122457	2053.94034409544	1957.2650806232	1321.39327233448	1656.9602604154	2382.51900845896	-0.153279	0.830209
arid1ab	568161	ENSDARG00000101891	2162.71305072929	2367.5485775954	2646.98638798918	1560.40999659498	1804.95495968193	2421.03993018021	-0.310759	0.59205
arid1b	569589	ENSDARG00000092503	1400.94772516877	1292.18207321744	1851.1541102592	1582.75708870064	1655.99297479928	1557.2082605813	0.077761	0.91025
arid2	566352	ENSDARG00000007413	1077.95144408819	1161.51197592579	1091.01370437892	1011.44882095603	1132.69145647778	1224.00228769254	0.0162301	0.981764
arid3a	562799	ENSDARG00000070843	40.8609753174224	83.2416916080149	32.7979362943266	67.0412763169701	57.0698513511435	49.1141751945866	0.142763	0.918273
arid3b	571249	ENSDARG00000104034	1024.44302402966	1211.84416154924	1096.80157548969	1630.36611101269	2884.44570727305	1485.944555397	0.848283	0.102046
arid3c	569444	ENSDARG00000114447	660.585767631663	819.833869674286	1141.17525400554	3288.90899033252	3202.68267497688	1536.02175363462	1.61451	0.0018164
arid4a	327404	ENSDARG00000043873	1746.32025463746	2082.97814349358	1827.03798063102	3039.20452636931	3052.75340447812	2474.00619754692	0.598745	0.148078
arid4b	100537923	ENSDARG00000090656	82.6948309995454	66.7869386157329	32.7979362943266	80.6438541204133	41.5932814932063	40.4469678073066	-0.164086	0.909703
arid5a	100462698	ENSDARG00000077120	33.0779323998182	12.5830464058627	8.68180666614527	34.978057208854	25.149426019148	7.70418434424888	0.319933	0.881179
arid5b	100536827	ENSDARG00000037196	444.606326668144	556.557821797774	546.953819967152	285.654133872307	263.101687584933	436.249438493093	-0.65229	0.241911
arid6	572528	ENSDARG00000069988	35.9965734939198	22.262312871911	30.8686459240721	44.6941842113134	12.574713009574	78.967889528551	0.61228	0.694594
arih1	327005	ENSDARG00000109413	384.287744056711	250.69300147065	367.529815533483	271.079943368618	296.95668414917	245.570875972933	-0.301213	0.661737
arih1l	405859	ENSDARG00000112965	64.2101040702352	72.5944984953618	39.5504525902173	92.3032065233646	50.298852038296	72.2267282273332	0.284724	0.808475
arih2	406417	ENSDARG00000012848	617.779031584839	664.965606217514	580.716401446606	1002.70430665381	916.986764082781	807.976333103101	0.549678	0.217708
arl1	436746	ENSDARG00000101680	463.091053597454	529.455875692839	421.549945900609	327.433479982883	535.876231331076	751.157973564265	0.191206	0.823157
arl10	560654	ENSDARG00000117130	12.6474447411069	20.3264595787013	18.3282585174178	31.0916064078702	92.8594191476234	6.74116130121777	1.34898	0.40132
arl11	324689	ENSDARG00000036637	54.4813004232299	58.0755987962895	96.4645185127252	104.934171626562	66.7427075123543	43.3360369363999	0.0406062	0.977628
arl13a	793658	ENSDARG00000052575	267.542100292647	210.040082313247	63.6665822183987	25.2619302063945	62.87356504787	121.34090342192	-1.36935	0.192829
arl13b	286784	ENSDARG00000012763	411.528394268326	249.725074824045	233.444134800795	318.688965680669	201.195408153184	187.789493391066	-0.33832	0.683933
arl14	556921	ENSDARG00000063223	20.4304876587112	5.80755987962895	6.75251629589077	0	4.83642808060538	1.92604608606222	-2.28589	1
arl14ep	751672	ENSDARG00000001210	317.158998892374	470.412350249945	668.499113293186	322.575416481653	398.521673841884	525.810581494986	-0.223729	0.794511
arl15a	567657	ENSDARG00000114295	54.4813004232299	46.4604790370316	41.4797429604719	11.6593524029513	4.83642808060538	7.70418434424888	-2.55732	0.0106711
arl15b	560030	ENSDARG00000109775	422.230078280032	455.893450550872	589.398208112751	1074.60364647201	1271.01329958309	1100.73533818456	1.23167	0.00163324
arl16	100037345	ENSDARG00000110386	63.2372237055347	31.9415793379592	39.5504525902173	1.94322540049189	2.90185684836323	15.4083686884978	-2.73296	0.0446973
arl2	449774	ENSDARG00000112191	172.199824551995	261.340194583303	541.165948856389	376.01411499518	504.923091615202	240.755760757777	0.202595	0.855618
arl2bp	393976	ENSDARG00000114401	51.5626593291283	61.9473053827088	30.8686459240721	0	0.967285616121077	16.3713917315289	-3.05689	0.0893991
arl3	797451	ENSDARG00000113228	493.250344903171	314.576160146568	429.267107381627	305.086387877226	585.207797753251	298.537143339644	-0.0574028	0.955775
arl3l1	393666	ENSDARG00000111106	346.34540983339	148.092776930538	80.0655503655619	0	36.7568534126009	26.9646452048711	-3.17226	0.0204742
arl3l2	393692	ENSDARG00000015404	226.681124975224	126.798390705232	69.4544533291622	0	19.3457123224215	26.00162216184	-3.22096	0.0140008
arl4aa	393834	ENSDARG00000099918	244.192971539834	440.406624205195	379.10555775501	1615.791920509	1950.04780210009	1156.59067468036	2.15041	2.13184e-06
arl4ab	338267	ENSDARG00000110649	145.93205470508	252.628854763859	256.595619243849	1453.53259956793	1604.72683714487	1777.74053743543	2.88385	3.50898e-12
arl4ca	550444	ENSDARG00000057606	65.1829844349358	76.4662050817811	59.8080014778896	18.4606413046729	46.4297095738117	76.0788203994576	-0.514917	0.685544
arl4cb	406531	ENSDARG00000110274	278.243784304353	309.736526913544	424.443881455991	121.451587530743	120.910702015135	220.532276854124	-1.12901	0.0546532
arl4d	323573	ENSDARG00000114046	483.521541256165	628.184393646531	437.948914047773	315.774127579932	341.45182249074	496.919890204052	-0.425093	0.50553
arl5a	436611	ENSDARG00000117003	224.735364245823	371.683832296253	479.428657008244	513.011505729858	456.558810809148	397.728516771848	0.345811	0.646211
arl5c	393819	ENSDARG00000035719	604.158706479032	1185.71014209091	330.873298498648	5763.60653785893	6139.36180552047	3112.49047507655	2.82381	3.70248e-06
arl6	494134	ENSDARG00000113281	284.081066492556	104.536077833321	100.323099253234	146.713517737137	92.8594191476234	72.2267282273332	-0.649035	0.5244
arl6ip1	394087	ENSDARG00000112340	2708.49893532629	3462.27361490546	4245.40345974504	6704.12763169701	6517.57048142381	5227.28907757286	0.824712	0.0565623
arl6ip4	553796	ENSDARG00000116805	286.999707586658	349.421519424342	508.368012562062	259.420590965667	295.022112916928	421.804092847626	-0.229762	0.780607
arl6ip5a	450076	ENSDARG00000114089	72.96602735254	66.7869386157329	51.1261948117444	129.22448913271	115.106988318408	151.194617755884	1.0512	0.097177
arl6ip5b	436790	ENSDARG00000016238	466.982575056256	470.412350249945	630.877951073223	679.157277471914	848.309485338184	669.301014906621	0.486191	0.358048
arl6ip6	100037347	ENSDARG00000071013	182.9015085637	283.602507455214	275.888522946394	463.459258017315	554.254658037377	586.481033205946	1.11157	0.0172348
arl8	327551	ENSDARG00000094709	678.097614196272	501.386002941299	368.49446071861	178.776736845254	302.760397845897	538.32988105439	-0.601951	0.467618
arl8a	567222	ENSDARG00000078686	1703.51351859063	1267.98390705232	1880.09346581301	946.350770039549	1177.18659481935	1612.10057403408	-0.377094	0.549116
arl8ba	337424	ENSDARG00000006915	321.050520351176	387.17065864193	635.701176998859	543.131499437482	721.595069626323	645.225438830843	0.507065	0.435698
arl8bb	562445	ENSDARG00000070318	61.2914629761336	76.4662050817811	54.9847755522534	40.8077334103296	92.8594191476234	158.898802100133	0.60219	0.591903
arl9	751670	ENSDARG00000071881	85.613472093647	33.8774326311689	12.5403874066543	50.523860412789	76.415563673565	61.633474753991	0.514442	0.732116
armc1	494066	ENSDARG00000013861	50.5897789644278	22.262312871911	36.6565170348356	3.88645080098377	12.574713009574	30.8167373769955	-1.21141	0.437871
armc10	557740	ENSDARG00000062960	176.091346010797	292.313847274657	164.95432665676	112.707073228529	168.307697205067	181.048332089849	-0.454894	0.571501
armc1l	321240	ENSDARG00000020887	329.806443633481	499.450149648089	553.706336263043	401.276045201575	550.385515572893	622.112885798097	0.186462	0.814213
armc2	555846	ENSDARG00000022660	79.7761899054438	15.4868263456772	22.1868392579268	0	43.5278527254484	0.963023043031109	-1.40039	0.60554
armc3	560136	ENSDARG00000074708	51.5626593291283	26.1340194583303	24.1161296281813	10.6877397027054	4.83642808060538	17.33441477456	-1.63128	0.221621
armc4	799229	ENSDARG00000111868	83.6677113642459	61.9473053827088	51.1261948117444	26.2335429066405	39.6587102609641	28.8906912909333	-1.05351	0.235848
armc5	569910	ENSDARG00000078083	220.843842787021	148.092776930538	118.651357770652	111.735460528283	110.270560237803	101.117419518266	-0.593533	0.418167
armc6	555425	ENSDARG00000103770	69.0745058937379	109.375711066345	80.0655503655619	276.909619570094	107.36870338944	123.266949507982	0.97321	0.230371
armc7	767659	ENSDARG00000061197	71.020266623139	92.9209580740632	134.085680732688	233.187048059026	115.106988318408	80.8939356146132	0.526044	0.608425
armc8	571528	ENSDARG00000110157	106.043959752358	115.183270945974	82.9594859209437	162.259320941073	73.5137068252018	204.160885122595	0.532371	0.571732
armc9	100334308	ENSDARG00000087299	131.338849234572	174.226796388868	133.121035547561	39.8361207100837	178.947838982399	82.8199817006754	-0.540502	0.626854
armt1	541518	ENSDARG00000112391	60.3185826114331	60.0114520894991	21.2221940727996	61.2116001154944	38.6914246448431	73.1897512703643	0.29034	0.834869
arnt	493634	ENSDARG00000115999	323.969161445278	591.403181075548	496.792270340535	2032.61376891451	1322.27943723751	560.479411044106	1.47122	0.0266408
arnt2	64277	ENSDARG00000103697	78.8033095407432	45.4925523904268	58.8433562927624	34.006444508608	56.1025657350224	61.633474753991	-0.27117	0.823549
arntl1a	58098	ENSDARG00000006791	388.179265515513	182.938136208312	335.696524424284	609.201163054206	290.185684836323	185.863447305004	0.259125	0.815761
arntl1b	352935	ENSDARG00000114562	242.247210810433	107.439857773136	88.7473570317072	351.723797489031	176.045982134036	101.117419518266	0.520453	0.64608
arntl2	58099	ENSDARG00000116327	85.613472093647	52.2680389166605	44.3736785158536	102.019333525824	59.0044225833857	45.2620830224621	0.178678	0.892902
arpc1a	394243	ENSDARG00000008383	985.527809441641	1086.01369749061	1700.66946137935	2831.27940851668	3972.64202540926	2280.43856589767	1.26797	0.00896114
arpc1b	335474	ENSDARG00000027063	525.355396938288	608.825860714435	813.195891062274	2014.15312760984	1931.66937539379	2733.05939612229	1.77806	9.8562e-06
arpc2	327068	ENSDARG00000075989	1102.2734532057	1901.97586057848	2364.3453487469	2865.28585302529	3748.23176246917	4096.70002505434	0.996366	0.0547218
arpc3	415204	ENSDARG00000057882	796.789018689737	1437.37107020816	2501.32496503497	4566.57969115593	4881.89050456307	3063.37629988196	1.4017	0.0195146
arpc4	114456	ENSDARG00000054063	543.840123867598	729.816691540038	1260.79125696132	627.661804358879	713.856784697355	1465.72107149335	0.147482	0.888318
arpc4l	445305	ENSDARG00000058225	679.070494560973	843.064109192802	1225.09938511161	1454.50421226818	1936.5058034744	1620.76778142136	0.867331	0.0760882
arpc5a	336504	ENSDARG00000039142	626.534954867144	1038.58529180698	1792.31075396643	3647.43407672327	4713.58280735801	3262.7220697894	1.74929	0.00123597
arpc5b	399482	ENSDARG00000019062	538.975722044096	896.300074756067	1634.10894360557	756.88629349159	1076.58889074276	1248.07786376832	0.00570227	0.996824
arpc5la	393550	ENSDARG00000041720	179.982867469599	219.719348779295	301.93394294483	256.505752864929	424.638385477153	295.648074210551	0.4773	0.499827
arpc5lb	556104	ENSDARG00000035433	284.081066492556	382.331025408906	560.458852558934	368.241213393212	669.361646355785	539.292904097421	0.362089	0.644174
arpin	550477	ENSDARG00000115959	53.5084200585294	109.375711066345	135.050325917815	212.783181353862	188.62069514361	123.266949507982	0.816298	0.313261
arpp19a	393603	ENSDARG00000109679	1078.92432445289	1247.65744747362	1920.60856358836	1643.96868881614	2008.08493906735	1401.19852761026	0.250694	0.724483
arpp19b	393947	ENSDARG00000039880	411.528394268326	672.709019390353	755.317179954639	640.292769462077	558.123800501861	753.084019650328	0.0852146	0.919025
arpp21	564134	ENSDARG00000061081	130.365968869872	169.387163155844	169.777552582396	137.969003434924	53.2007088866592	156.00973297104	-0.43554	0.659674
arr3a	436678	ENSDARG00000114648	3363.24742076975	2027.80632463711	864.322085874018	56.3535366142647	327.909823865045	217.643207725031	-3.37745	2.53767e-05
arr3b	796867	ENSDARG00000098475	2180.2248972939	917.594460981374	1081.36725252765	93.2748192236105	211.835549930516	174.307170788631	-3.12382	5.60852e-08
arrb1	553266	ENSDARG00000043241	41.833855682123	15.4868263456772	23.1514844430541	48.5806350122972	27.0839972513901	14.4453456454666	0.163155	0.932413
arrb2a	321378	ENSDARG00000039215	397.908069162518	238.109955064787	487.145818489262	258.448978265421	185.718838295247	325.501788544515	-0.545247	0.456834
arrb2b	394099	ENSDARG00000011545	860.999122759973	1109.24393700913	1355.32648510379	2451.37884272051	2735.4837223904	2188.95137680971	1.14919	0.00456549
arrdc1a	100006005	ENSDARG00000068148	125.501567046369	202.296669140408	215.115876283377	157.401257439843	248.592403343117	114.599742120702	-0.0606192	0.958288
arrdc1b	570029	ENSDARG00000109340	183.874388928401	167.451309862635	178.459359248542	437.225715110674	189.587980759731	273.498544220835	0.764994	0.249584
arrdc2	335206	ENSDARG00000020761	697.555221490283	1026.00224540111	1633.14429842044	1164.96362759489	1501.22727621991	1094.95719992637	0.164116	0.849279
arrdc3a	566685	ENSDARG00000052690	1700.59487749653	1095.69296395666	1526.06868287131	3350.12059044801	5583.17257625085	1983.82746864409	1.3367	0.0194496
arrdc3b	447866	ENSDARG00000036028	1496.29000090942	1408.33327081002	2230.25966801421	3000.34001835947	2318.58362184222	2287.17972719888	0.566818	0.275228
arsa	541416	ENSDARG00000042270	29.186410941016	5.80755987962895	7.71716148101802	0	13.5419986256951	11.5562765163733	-0.766643	1
arsb	100538007	ENSDARG00000108788	21.4033680234117	5.80755987962895	0	39.8361207100837	4.83642808060538	1.92604608606222	0.776206	1
arsg	564790	ENSDARG00000101715	49.6168985997272	48.3963323302412	35.6918718497083	0	3.86914246448431	42.3730138933688	-1.53143	0.48158
arsh	100332997	ENSDARG00000002299	42.8067360468235	60.0114520894991	26.0454199984358	82.5870795209052	53.2007088866592	32.7427834630577	0.387106	0.77169
arsia	100329483	ENSDARG00000077606	54.4813004232299	78.4020583749908	34.7272266645811	59.2683747150025	5.80371369672646	23.1125530327466	-0.926653	0.547389
arsk	562412	ENSDARG00000115105	50.5897789644278	57.1076721496846	53.0554851819989	60.2399874152485	71.5791355929597	53.9292904097421	0.208476	0.850558
art4	555597	ENSDARG00000078178	14.593205470508	9.67926646604825	3.85858074050901	6.8012889017216	5.80371369672646	2.88906912909333	-0.860479	1
artn	101882107		29.186410941016	14.5188996990724	1.9292903702545	20.4038667051648	21.2802835546637	1.92604608606222	-0.0654121	1
arv1	568203	ENSDARG00000074757	146.904935069781	128.734243998442	151.449294064979	82.5870795209052	169.274982821188	122.303926464951	-0.190821	0.844093
arvcfa	572216	ENSDARG00000074329	58.372821882032	17.4226796388868	25.0807748133086	60.2399874152485	9.67285616121077	1.92604608606222	-0.489905	0.837803
arvcfb	564669	ENSDARG00000061688	1019.57862220616	1228.29891454152	1375.58403399146	2762.29490679922	2916.36613260505	2526.0094418706	1.17907	0.00107662
arxa	30657	ENSDARG00000058011	33.0779323998182	5.80755987962895	18.3282585174178	18.4606413046729	3.86914246448431	4.81511521515555	-1.07593	1
arxb	100329907	ENSDARG00000101523	35.9965734939198	19.3585329320965	43.4090333307264	76.7574033194295	31.9204253319955	3.85209217212444	0.188082	0.93482
as3mt	664699	ENSDARG00000027572	87.559232823048	179.066429621893	173.636133322905	120.479974830497	152.83112734713	88.5981199588621	-0.282808	0.77701
asah1a	450068	ENSDARG00000112187	103.125318658257	100.664371246902	161.095745916251	74.8141779189376	91.8921335315023	143.490433411635	-0.234225	0.821819
asah1b	393549	ENSDARG00000116060	203.331996222412	411.36882480705	422.514591085737	208.896730552878	334.680823177892	530.625696710141	0.0505603	0.965811
asah2	493602	ENSDARG00000012829	17.5118465646096	4.83963323302412	13.5050325917815	32.0632191081161	1.93457123224215	14.4453456454666	0.433994	1
asap1a	100170829	ENSDARG00000029463	1313.38849234572	1252.49708070664	1647.61397619735	1612.87708240827	1600.85769468038	1694.92055573475	0.220305	0.696645
asap1b	565859	ENSDARG00000039729	813.327984889646	497.51429635488	441.807494788282	1300.01779292907	1372.57828927581	1404.08759673936	1.21788	0.00769529
asap2a	570669	ENSDARG00000010181	450.443608856347	404.593338280817	474.605431082608	2151.15051834452	2027.43065138978	1473.4252558376	2.08772	1.14552e-08
asap2b	560581	ENSDARG00000019564	99.2337971994545	90.9851047808535	111.898841474761	142.827066936154	155.732984195493	85.7090508297687	0.346945	0.696395
asap3	664764	ENSDARG00000021896	268.514980657347	847.903742425826	115.75742221527	206.953505152386	536.843516947197	179.122286003786	-0.416929	0.76576
asb1	554673	ENSDARG00000026635	13.6203251058075	12.5830464058627	3.85858074050901	7.77290160196755	0	0.963023043031109	-1.78357	1
asb10	559467	ENSDARG00000099461	21.4033680234117	7.7434131728386	8.68180666614527	0	23.2148547869058	3.85209217212444	-0.482772	1
asb11	791758	ENSDARG00000056561	17.5118465646096	7.7434131728386	13.5050325917815	0	1.93457123224215	10.5932534733422	-1.62867	1
asb12a	322927	ENSDARG00000110715	245.165851904535	388.138585288535	607.726466630169	378.928953095918	578.436798440404	507.513143677395	0.239221	0.789545
asb12b	445507	ENSDARG00000116721	27.240650211615	20.3264595787013	19.292903702545	11.6593524029513	23.2148547869058	5.77813825818666	-0.717852	0.68505
asb13a.1	436801	ENSDARG00000109650	93.3965150112513	78.4020583749908	106.110970363998	29.1483810073783	54.1679945027803	53.9292904097421	-1.01775	0.200651
asb13a.2	563551	ENSDARG00000109879	14.593205470508	17.4226796388868	12.5403874066543	6.8012889017216	7.73828492896861	31.7797604200266	0.056291	1
asb13b	556808	ENSDARG00000089833	17.5118465646096	5.80755987962895	2.89393555538176	0	4.83642808060538	6.74116130121777	-1.1783	1
asb14a	568371	ENSDARG00000008473	13.6203251058075	4.83963323302412	9.64645185127252	11.6593524029513	2.90185684836323	1.92604608606222	-0.769951	1
asb14b	100535284	ENSDARG00000112104	17.5118465646096	10.6471931126531	8.68180666614527	40.8077334103296	0	7.70418434424888	0.396937	1
asb15a	100151067	ENSDARG00000115823	28.2135305763155	12.5830464058627	28.9393555538176	29.1483810073783	21.2802835546637	0.963023043031109	-0.440577	0.854831
asb15b	568579	ENSDARG00000045863	12.6474447411069	9.67926646604825	5.78787111076351	48.5806350122972	3.86914246448431	0	0.899512	1
asb16	678621	ENSDARG00000110292	23.3491287528128	10.6471931126531	4.82322592563626	21.3754794054108	19.3457123224215	22.1495299897155	0.69595	0.708063
asb18	792746	ENSDARG00000012948	23.3491287528128	10.6471931126531	7.71716148101802	0	9.67285616121077	4.81511521515555	-1.52526	1
asb2a.1	567986	ENSDARG00000003797	25.2948894822139	19.3585329320965	8.68180666614527	0	11.6074273934529	0	-2.19997	1
asb2a.2	100536271	ENSDARG00000096748	15.5660858352085	10.6471931126531	12.5403874066543	29.1483810073783	0	0	-0.411171	1
asb2b	402848	ENSDARG00000102490	91.4507542818502	78.4020583749908	111.898841474761	62.1832128157404	26.1167116352691	27.9276682479022	-1.27767	0.1313
asb3	334210	ENSDARG00000005246	139.121892152176	151.964483516957	178.459359248542	199.180603550418	237.952261565785	198.382746864409	0.436631	0.499045
asb4	550321	ENSDARG00000034988	76.8575488113422	76.4662050817811	92.6059377722162	10.6877397027054	22.2475691707848	132.897179938293	-0.568369	0.737523
asb5a	550441	ENSDARG00000114709	23.3491287528128	19.3585329320965	22.1868392579268	0	16.4438554740583	27.9276682479022	-0.548217	0.83577
asb5b	550449	ENSDARG00000053222	236.40992862223	205.200449080223	341.484395535047	106.877397027054	43.5278527254484	81.8569586576443	-1.7535	0.00512715
asb6	553600	ENSDARG00000007125	31.1321716704171	27.1019461049351	41.4797429604719	50.523860412789	55.1352801189014	35.631852592151	0.502694	0.667788
asb7	405798	ENSDARG00000006494	50.5897789644278	41.6208458040075	14.4696777769088	33.0348318083621	19.3457123224215	23.1125530327466	-0.498821	0.747376
asb8	327200	ENSDARG00000003383	299.647152327764	221.655202072505	313.509685166357	296.341873575013	383.045103983946	260.979244661431	0.171764	0.825675
ascc1	550273	ENSDARG00000077760	62.2643433408342	157.772043396586	204.504779246978	344.92250858731	334.680823177892	494.030821074959	1.46694	0.0286643
ascc2	393414	ENSDARG00000013058	241.274330445732	387.17065864193	344.378331090429	668.469537769209	468.166238202601	252.312037274151	0.513702	0.519541
ascc3	100332599	ENSDARG00000086678	69.0745058937379	89.0492514876439	47.2676140712354	118.536749430005	57.0698513511435	38.5209217212444	0.0600062	0.968718
ascl1a	30466	ENSDARG00000038386	839.595754736561	1052.13626485944	790.04440661922	76.7574033194295	157.667555427735	458.398968482808	-1.95257	0.0109656
ascl1b	30478	ENSDARG00000101628	161.498140540289	171.323016449054	529.590206634862	28.1767683071324	50.298852038296	56.8183595388355	-2.6722	0.000406095
asf1ba	386897	ENSDARG00000101037	367.748777856802	670.773166097143	544.05988441177	321.603803781407	477.839094363812	524.847558451955	-0.257054	0.743117
asf1bb	792029	ENSDARG00000043713	406.663992444823	470.412350249945	574.928530335842	467.345708818299	507.824948463565	393.876424599724	-0.0849	0.911439
ash1l	563799	ENSDARG00000070981	1729.78128843755	1994.89681865254	1725.75023619265	1985.97635930271	2161.88335203061	1668.91893357291	0.0938481	0.882932
ash2l	558193	ENSDARG00000060392	655.72136580816	927.273727447422	925.094732537035	645.150832963306	885.066338750785	1089.17906166818	0.0626501	0.941935
asic1a	791696	ENSDARG00000008329	28.2135305763155	31.9415793379592	23.1514844430541	12.6309651031973	0	0.963023043031109	-2.61632	0.20213
asic1b	407672	ENSDARG00000101866	285.053946857256	230.366541891948	385.858074050901	13.6025778034432	79.3174205219283	142.527410368604	-1.93645	0.0407984
asic1c	407670	ENSDARG00000098428	79.7761899054438	86.1454715478294	157.237165175742	7.77290160196755	53.2007088866592	7.70418434424888	-2.23435	0.053094
asic2	407669	ENSDARG00000006849	187.765910387203	69.6907185555474	208.363359987487	22.3470921056567	32.8877109481166	86.6720738727998	-1.71465	0.0688163
asic4a	407668	ENSDARG00000025162	21.4033680234117	10.6471931126531	15.434322962036	0.971612700245943	0.967285616121077	9.63023043031109	-2.03627	1
asic4b	407667	ENSDARG00000004243	35.9965734939198	31.9415793379592	24.1161296281813	21.3754794054108	0	23.1125530327466	-1.04902	0.632451
asip1	798574	ENSDARG00000077858	209.169278410615	406.529191574026	317.368265906866	10.6877397027054	26.1167116352691	26.00162216184	-3.89269	6.64517e-10
asip2b	796595	ENSDARG00000114760	52.5355396938288	95.8247380138776	70.4190985142894	16.517415904181	16.4438554740583	1.92604608606222	-2.64915	0.0158705
asl	393423	ENSDARG00000033361	72.96602735254	76.4662050817811	104.181679993743	168.088997142548	126.714415711861	126.156018637075	0.730958	0.286912
asmt	100141344	ENSDARG00000098249	116.745643764064	143.253143697514	83.924131106071	0	75.448278057444	42.3730138933688	-1.5454	0.367715
asmt2	568256	ENSDARG00000109921	63.2372237055347	79.3699850215956	51.1261948117444	74.8141779189376	29.0185684836323	59.7074286679288	-0.244451	0.84921
asmtl	324134	ENSDARG00000114151	298.674271963064	250.69300147065	241.161296281813	244.846400461978	159.602126659978	102.080442561298	-0.642231	0.379734
asna1	325704	ENSDARG00000018190	116.745643764064	107.439857773136	108.040260734252	223.470921056567	204.097265001547	106.895557776453	0.685888	0.351581
asns	394138	ENSDARG00000016375	336.616606186385	394.914071814768	344.378331090429	414.878623005018	340.484536874619	385.209217212444	0.0841936	0.908732
asnsd1	368827	ENSDARG00000000540	179.982867469599	247.789221530835	227.656263690032	132.139327233448	313.400539623229	252.312037274151	0.0905	0.931495
aspa	557232	ENSDARG00000005154	23.3491287528128	31.9415793379592	39.5504525902173	29.1483810073783	29.0185684836323	35.631852592151	-0.0160013	0.993405
aspdh	447919	ENSDARG00000038297	1.94576072940107	4.83963323302412	13.5050325917815	2.91483810073783	2.90185684836323	5.77813825818666	-0.807384	1
aspg	100124594	ENSDARG00000052942	239.328569716331	190.68154938115	276.853168131521	247.761238562716	193.457123224215	263.868313790524	-0.00363419	0.997506
asph	323659	ENSDARG00000055945	885.321131877486	736.592178066271	587.468917742497	221.527695656075	373.372247822736	849.386323953438	-0.613249	0.484659
asphd1	557921	ENSDARG00000075813	124.528686681668	53.2359655632653	132.156390362434	27.2051556068864	42.5605671093274	56.8183595388355	-1.29167	0.139749
asphd2	569819	ENSDARG00000059629	251.976014457438	210.040082313247	437.948914047773	366.297987992721	339.517251258498	181.048332089849	-0.0212074	0.985729
aspm	554173	ENSDARG00000103754	1403.86636626287	2808.9231284472	1428.63951917346	1591.50160300285	1565.0681268839	1796.03797525302	-0.187871	0.814441
aspn	65228	ENSDARG00000002192	1907.81839517775	3581.32859243785	978.150217719034	44.6941842113134	57.0698513511435	141.564387325573	-4.73206	7.63685e-11
aspscr1	550237	ENSDARG00000105321	192.630312210706	259.404341290093	210.292650357741	341.036057786326	309.531397158744	376.542009825164	0.63297	0.228427
asrgl1	541402	ENSDARG00000021681	56.427061152631	41.6208458040075	50.1615496266171	72.8709525184457	66.7427075123543	25.0385991188088	0.151695	0.9161
ass1	447864		215.006560598818	363.940419123414	311.580394796103	143.7986796364	99.6304184604709	318.760627243297	-0.663562	0.451423
aste1	100006826	ENSDARG00000070132	50.5897789644278	41.6208458040075	13.5050325917815	24.2903175061486	4.83642808060538	44.299059979431	-0.525634	0.787655
aste1b	100003699	ENSDARG00000062530	87.559232823048	46.4604790370316	96.4645185127252	68.984501717462	53.2007088866592	36.5948756351822	-0.537739	0.614953
astn1	791157	ENSDARG00000068323	758.846684466416	283.602507455214	788.115116248965	33.0348318083621	120.910702015135	163.713917315289	-2.52664	0.00123404
astn2	100535087	ENSDARG00000105924	22.3762483881123	7.7434131728386	14.4696777769088	4.85806350122972	2.90185684836323	6.74116130121777	-1.62028	1
asun	334292	ENSDARG00000011764	286.999707586658	256.500561350278	329.90865331352	325.490254582391	533.941660098834	314.908535071173	0.427113	0.527567
asxl1	403066	ENSDARG00000115751	1048.76503314718	751.111077765344	997.443121421579	703.447594978063	1151.06988318408	1211.48298813314	0.132327	0.864153
asxl2	100150267	ENSDARG00000076501	95.3422757406523	57.1076721496846	28.9393555538176	51.495473113035	33.8549965642377	17.33441477456	-0.820922	0.520655
asz1	572911	ENSDARG00000116151	19.4576072940107	5.80755987962895	11.575742221527	0	0.967285616121077	10.5932534733422	-1.67128	1
atad1a	368672	ENSDARG00000023267	53.5084200585294	31.9415793379592	27.9747103686903	60.2399874152485	43.5278527254484	35.631852592151	0.297538	0.824192
atad1b	368412	ENSDARG00000056609	25.2948894822139	46.4604790370316	25.0807748133086	5.82967620147566	18.3784267063005	34.6688295491199	-0.717577	0.66995
atad2b	100331225	ENSDARG00000060537	284.081066492556	447.182110731429	250.807748133086	359.496699090999	507.824948463565	445.879668923404	0.4192	0.542838
atad3	403004	ENSDARG00000086848	283.108186127855	513.001122700557	533.448787375371	248.732851262961	433.343956022242	701.080775326648	0.0570301	0.961305
atad5a	560591	ENSDARG00000070568	626.534954867144	959.215306785381	571.069949595333	294.398648174521	620.03007993361	753.084019650328	-0.371186	0.661526
atad5b	321619	ENSDARG00000116936	86.5863524583475	107.439857773136	66.5605177737804	10.6877397027054	91.8921335315023	133.860202981324	-0.140185	0.940574
atat1	406389	ENSDARG00000004472	187.765910387203	81.3058383148053	175.56542369316	0	66.7427075123543	134.823226024355	-1.14129	0.556879
atcaya	565827	ENSDARG00000071678	388.179265515513	219.719348779295	497.756915525662	20.4038667051648	85.1211342186547	132.897179938293	-2.21319	0.00815212
atcayb	100329872	ENSDARG00000059781	35.0236931292192	12.5830464058627	14.4696777769088	44.6941842113134	2.90185684836323	3.85209217212444	-0.2711	0.92072
ate1	101886126	ENSDARG00000103813	37.9423342233208	26.1340194583303	16.3989681471633	24.2903175061486	1.93457123224215	50.0771982376177	-0.0766428	0.976709
atf1	325609	ENSDARG00000109865	615.833270855438	785.956437043117	880.721054021181	721.908236282736	826.061916167399	1212.44601117617	0.274268	0.692515
atf2	100006516	ENSDARG00000023903	189.711671116604	92.9209580740632	244.055231837195	205.98189245214	236.984975949664	87.635096915831	0.0106365	0.994673
atf3	393939	ENSDARG00000007823	7404.59245573576	10363.5906051979	636.665822183987	23191.4235421704	28553.3041022781	11699.7669497849	1.78541	0.0778579
atf4a	406514	ENSDARG00000111939	4338.07354619968	5933.39034368757	1710.31591323062	5836.47749037738	6416.0054917311	10348.6456204123	0.915556	0.200871
atf4b	556410	ENSDARG00000114163	11490.689987478	14699.9019819875	5452.17458633923	25045.2605742397	21219.3445608481	20461.350595282	1.07637	0.0526868
atf5a	566223	ENSDARG00000068096	174.145585281396	45.4925523904268	12.5403874066543	40.8077334103296	23.2148547869058	10.5932534733422	-1.63774	0.266898
atf5b	567253	ENSDARG00000077785	328.83356326878	366.844199063228	513.191238487698	769.517258594787	644.212220336637	458.398968482808	0.630985	0.280967
atf6	558071	ENSDARG00000012656	132.311729599273	166.48338321603	79.1009051804347	161.287708240827	84.1538486025337	183.937401218942	0.184304	0.868539
atf6b	777612		412.501274633026	449.117964024639	404.186332568319	652.923734565274	606.488081307915	586.481033205946	0.544258	0.228541
atf7a	566279	ENSDARG00000011298	40.8609753174224	66.7869386157329	44.3736785158536	238.045111560256	187.653409527489	58.7444056248977	1.67198	0.0464643
atf7b	567018	ENSDARG00000115171	344.399649103989	179.066429621893	271.065297020758	346.865733987802	268.905401281659	236.903668585653	0.10189	0.913165
atf7ip	558977	ENSDARG00000069619	1542.98825841505	1504.1580088239	1234.74583696288	1007.56237015504	1044.66846541076	2148.50440900241	-0.0275928	0.977857
atf7ip2	100005485	ENSDARG00000089698	182.9015085637	174.226796388868	351.13084738632	280.796070371078	156.700269811614	219.569253811093	-0.108292	0.918116
atg10	641330	ENSDARG00000104846	61.2914629761336	105.504004479926	130.227099992179	131.167714533202	144.12555680204	108.821603862515	0.370864	0.689846
atg101	567680	ENSDARG00000043287	268.514980657347	306.832746973729	489.075108859517	591.712134449779	414.965529315942	368.837825480915	0.369855	0.622639
atg12	570965	ENSDARG00000113990	42.8067360468235	79.3699850215956	71.3837436994167	252.619302063945	227.312119788453	71.2637051843021	1.50968	0.0646983
atg13	393405	ENSDARG00000036040	659.612887266962	556.557821797774	863.357440688891	451.799905614364	727.39878332305	678.931245336932	-0.162399	0.834578
atg16l1	550552	ENSDARG00000099430	8.7559232823048	2.90377993981447	0.964645185127252	12.6309651031973	7.73828492896861	2.88906912909333	0.881862	1
atg16l2	100034627	ENSDARG00000043238	21.4033680234117	17.4226796388868	15.434322962036	41.7793461105756	53.2007088866592	11.5562765163733	0.973346	0.503327
atg2b	100000277	ENSDARG00000097650	34.0508127645187	27.1019461049351	12.5403874066543	2.91483810073783	6.77099931284754	62.5964977970221	-0.0275864	0.993405
atg3	336632	ENSDARG00000009350	236.40992862223	277.794947575585	393.575235531919	326.461867282637	382.077818367825	367.874802437884	0.245793	0.735523
atg4a	554140	ENSDARG00000014531	18.4847269293101	17.4226796388868	25.0807748133086	21.3754794054108	49.3315664221749	23.1125530327466	0.621304	0.672929
atg4b	448859	ENSDARG00000052104	234.464167892829	235.206175124972	260.454199984358	294.398648174521	268.905401281659	278.313659435991	0.205007	0.758919
atg4c	415193	ENSDARG00000044373	216.952321328219	221.655202072505	218.009811838759	355.610248290015	170.242268437309	172.381124702569	0.0886073	0.9315
atg4da	795933	ENSDARG00000043548	275.325143210251	202.296669140408	250.807748133086	397.389594400591	758.351923038924	481.511521515555	1.16843	0.0252957
atg4db	100329304	ENSDARG00000088145	12.6474447411069	2.90377993981447	0.964645185127252	0	9.67285616121077	14.4453456454666	0.546832	1
atg5	494180	ENSDARG00000023396	246.138732269235	392.010291874954	420.585300715482	790.892738000198	709.020356616749	431.434323277937	0.867228	0.136312
atg7	100333016	ENSDARG00000102893	72.96602735254	109.375711066345	88.7473570317072	81.6154668206592	152.83112734713	113.636719077671	0.360668	0.700136
atg9a	100009663	ENSDARG00000044551	265.596339563246	226.494835305529	399.363106642683	295.370260874767	333.713537561771	274.461567263866	0.0194072	0.983438
atg9b	791223	ENSDARG00000055292	681.989135655074	722.073278367199	695.509178476749	914.287550931433	999.206041453072	665.448922734497	0.296675	0.615696
atic	140622	ENSDARG00000016706	97.2880364700534	188.745696087941	95.499873327598	3.88645080098377	21.2802835546637	136.749272110418	-1.23642	0.44316
atl1	571909	ENSDARG00000060481	247.111612633936	148.092776930538	300.969297759703	1251.43715791677	860.884198347758	492.104774988897	1.90342	0.00103889
atl2	323665	ENSDARG00000113487	333.697965092283	561.397455030798	481.357947378499	316.745740280177	446.885954647937	480.548498472524	-0.145756	0.857898
atl3	449995	ENSDARG00000004270	651.829844349358	1105.37223042271	728.307114771076	1275.72747542292	1580.54469674184	1348.23226024355	0.758391	0.123266
atm	403064	ENSDARG00000002385	210.142158775315	309.736526913544	249.843102947958	262.335429066405	295.989398533049	283.128774651146	0.128537	0.867025
atmin	571606	ENSDARG00000068601	149.823576163882	69.6907185555474	81.0301955506892	1.94322540049189	47.3969951899328	79.9309125715821	-1.21701	0.438081
atn1	321707	ENSDARG00000092067	579.836697361518	532.359655632653	623.160789592205	113.678685928775	187.653409527489	245.570875972933	-1.66581	0.000766459
atoh1a	30303	ENSDARG00000055294	59.3457022467326	64.8510853225232	106.110970363998	0	8.70557054508969	20.2234839036533	-2.99239	0.0298932
atoh1b	493915	ENSDARG00000099564	51.5626593291283	50.3321856234509	36.6565170348356	8.74451430221349	22.2475691707848	16.3713917315289	-1.54837	0.140067
atoh1c	100498672	ENSDARG00000039602	60.3185826114331	52.2680389166605	82.9594859209437	0	17.4111410901794	30.8167373769955	-2.01927	0.206643
atoh7	58216	ENSDARG00000069552	130.365968869872	84.2096182546197	55.9494207373806	12.6309651031973	30.9531397158744	101.117419518266	-0.902461	0.511346
atoh8	561606	ENSDARG00000110248	433.904642656438	577.85220802308	568.176014039952	506.210216828136	707.085785384507	489.215705859804	0.107789	0.887786
atox1	558347	ENSDARG00000087693	160.525260175588	261.340194583303	416.726719974973	583.939232847812	433.343956022242	338.021088103919	0.692518	0.351026
atp10a	567172	ENSDARG00000110280	425.148719374133	665.933532864119	466.88826960159	1345.68358984063	1388.05485913374	877.313992201341	1.21274	0.00963848
atp10b	563932	ENSDARG00000076230	40.8609753174224	40.6529191574026	81.9948407358165	16.517415904181	28.0512828675112	13.4823226024355	-1.49409	0.147832
atp10d	571658	ENSDARG00000078887	357.047093845096	306.832746973729	375.246977014501	303.143162476734	319.204253319955	343.799226362106	-0.105049	0.883264
atp11a	562925	ENSDARG00000115219	202.359115857711	205.200449080223	119.616002955779	454.714743715101	394.652531377399	244.607852929902	1.05324	0.0787844
atp11c	368385	ENSDARG00000116165	537.029961314695	597.210740955177	711.908146623912	2252.1982391701	2931.84270246298	1977.08630734287	1.95565	2.01879e-07
atp13a1	334466	ENSDARG00000029931	369.694538586203	447.182110731429	341.484395535047	419.736686506247	502.98852038296	492.104774988897	0.288556	0.635143
atp13a2	568666	ENSDARG00000117108	109.93548121116	159.707896689796	110.934196289634	228.328984557797	216.671978011121	140.601364282542	0.621688	0.376121
atp13a3	572029	ENSDARG00000076622	61.2914629761336	76.4662050817811	69.4544533291622	88.4167557223808	182.816981446883	77.0418434424888	0.749094	0.394873
atp1a1a.1	64612	ENSDARG00000002791	4166.84660201239	5490.07993954256	4495.246562693	5942.38327470419	7789.55106662303	7329.56838050977	0.573586	0.192072
atp1a1a.2	64613	ENSDARG00000007739	199.440474763609	1515.77312858316	2184.92134431323	20.4038667051648	107.36870338944	137.712295153449	-3.87675	0.000144466
atp1a1a.3	64614	ENSDARG00000039131	61.2914629761336	146.156923637329	344.378331090429	65.0980509164782	34.8222821803588	29.8537143339644	-2.08837	0.0234238
atp1a1a.4	64615	ENSDARG00000001870	272.40650211615	964.054940018405	947.281571794962	205.010279751894	371.437676590493	479.585475429492	-1.04814	0.1937
atp1a1a.5	245703	ENSDARG00000040252	20.4304876587112	27.1019461049351	28.9393555538176	8.74451430221349	9.67285616121077	14.4453456454666	-1.21834	0.373835
atp1a1b	64616	ENSDARG00000115121	5702.05181750983	4507.63439323867	9825.87585570619	251.647689363699	643.244934720516	1111.3285916579	-3.31999	4.83539e-07
atp1a2a	64609	ENSDARG00000111818	33.0779323998182	45.4925523904268	35.6918718497083	0	2.90185684836323	9.63023043031109	-3.1875	0.0409234
atp1a3a	64610	ENSDARG00000018259	3535.44724532174	1176.03087562486	2151.15876283377	487.749575523463	512.661376544171	1550.46709928009	-1.42775	0.0636281
atp1a3b	64611	ENSDARG00000104139	1363.97827131015	845.967889132617	550.812400707661	107.8490097273	299.858540997534	507.513143677395	-1.59282	0.039356
atp1b1a	64267	ENSDARG00000013144	3080.13923464189	5071.93562820928	4155.6914575282	6159.05290685903	9316.89505447821	10978.4626905546	1.10394	0.0202847
atp1b1b	64273	ENSDARG00000076833	557.460448973406	2249.46152670961	2553.41580503184	161.287708240827	424.638385477153	397.728516771848	-2.44608	0.000914893
atp1b2a	64269	ENSDARG00000099203	8204.3001155196	4051.7409426878	5644.13897817955	674.299213970685	1438.35371117204	3966.69191424514	-1.55798	0.0507813
atp1b2b	114457	ENSDARG00000113354	1648.0593378027	824.67350290731	232.479489615668	20.4038667051648	134.45270064083	126.156018637075	-3.26696	0.000701056
atp1b3a	30468	ENSDARG00000015790	1516.72048856813	844.032035839407	820.913052543292	78.7006287199214	322.106110168318	984.209549977794	-1.19985	0.268292
atp1b3b	64272	ENSDARG00000042837	828.894070724855	506.225636174323	1101.62480141532	103.962558926316	169.274982821188	428.545254148844	-1.7958	0.0141314
atp1b4	100037383	ENSDARG00000053262	2661.80067782066	1406.39741751681	2475.27954503653	304.11477517698	206.031836233789	456.472922396746	-2.75901	5.72826e-08
atp2a1	260440	ENSDARG00000020574	814.300865254347	1030.84187863414	1347.60932362277	310.916064078702	235.050404717422	281.202728565084	-1.94856	2.57895e-06
atp2a1l	494489	ENSDARG00000035458	87.559232823048	150.028630223748	308.686459240721	4.85806350122972	67.7099931284754	104.969511690391	-1.62141	0.211755
atp2a2a	393940	ENSDARG00000029439	133.284609963973	200.360815847199	203.54013406185	162.259320941073	183.784267063005	235.940645542622	0.115556	0.899513
atp2a2b	568265	ENSDARG00000005122	959.260039594726	1176.03087562486	1203.87719103881	598.513423351501	713.856784697355	1053.54720907603	-0.497076	0.388983
atp2a3	568671	ENSDARG00000060978	410.555513903625	544.942702038516	876.862473280672	1075.57525917226	724.496926474686	826.273770920692	0.519328	0.440165
atp2b1a	378746	ENSDARG00000012684	1311.44273161632	1200.22904178998	1447.93242287601	1125.1275068848	1466.40499403955	1474.38827888063	0.0382304	0.958595
atp2b1b	561190	ENSDARG00000007788	1565.36450680316	1069.55894449833	223.797682949523	53.4386985135269	238.919547181906	273.498544220835	-2.33681	0.0129443
atp2b2	557430	ENSDARG00000063433	554.541807879304	373.619685589462	1364.97293695506	113.678685928775	109.303274621682	225.34739206928	-2.35465	0.000748248
atp2b3a	436745	ENSDARG00000043474	1748.26601536686	848.871669072431	2308.39592800952	351.723797489031	536.843516947197	1534.09570754856	-1.0178	0.251147
atp2b3b	558525	ENSDARG00000112865	1301.71392796931	826.60935620052	2646.98638798918	172.947060643778	297.923969765292	432.397346320968	-2.40234	0.000180399
atp2b4	768304	ENSDARG00000044902	299.647152327764	363.940419123414	364.635879978101	465.402483417807	996.304184604709	442.027576751279	0.888669	0.154167
atp2c1	559574	ENSDARG00000060197	529.24691839709	587.531474489128	600.009305149151	564.506978842893	578.436798440404	466.103152827057	-0.0935216	0.892038
atp5a1	553755	ENSDARG00000010149	6919.1251537502	10096.4428507349	9836.48695274259	10571.1461786759	11214.7094333078	14339.4131107332	0.427976	0.414981
atp5b	554135	ENSDARG00000070083	7731.48025827514	9967.70860673648	11479.2777030143	11104.5615511109	11686.7448139748	12370.9940107776	0.269125	0.62593
atp5c1	336957	ENSDARG00000045514	2163.68593109399	3929.78218521559	5204.26077376153	3800.94888336213	4666.18581216807	4095.73700201131	0.153131	0.854807
atp5d	335709	ENSDARG00000019404	1039.03622950017	2168.15568839481	2934.4506531571	2977.99292625382	3324.56066260814	2873.66076040483	0.579268	0.399161
atp5e	798291	ENSDARG00000095897	734.524675348903	1852.61160160163	2216.75463542243	3568.73344800335	2802.22642990276	1431.05224194423	0.699634	0.391113
atp5f1	449787	ENSDARG00000011553	2246.38076209353	3967.53132443318	4887.85715303979	5246.70858132809	6082.29195416933	4719.77593389547	0.53167	0.384421
atp5g1	406301	ENSDARG00000056008	1973.00137961268	4738.00093513062	7080.49565883403	4018.59012821722	4818.04965389908	4912.38054250169	-0.00445165	0.997506
atp5g3a	394151	ENSDARG00000017775	1437.91717902739	2279.46725275436	2876.57194204947	1960.71442909631	2414.34489783821	3068.19141509711	0.174787	0.825801
atp5g3b	81541	ENSDARG00000009447	3575.33534027446	7536.27687046516	8263.15065580004	12890.3856941629	11070.5838765057	9372.14025477876	0.782776	0.176024
atp5h	393675	ENSDARG00000098355	1584.82211409717	3341.28278407985	4709.39779379125	4360.59779870379	4711.64823612576	3737.49243000374	0.410805	0.599551
atp5ia	559659	ENSDARG00000078113	339.535247280486	748.207297825529	774.610083657184	1470.05001547211	1302.93372491509	572.035687560479	0.844866	0.253441
atp5ib	767750	ENSDARG00000117205	696.582341125582	1561.26568097358	2337.33528356333	2692.33879238151	2783.84800319646	1425.27410368604	0.586769	0.484245
atp5j	406599	ENSDARG00000014313	964.124441418229	2054.90827074204	2804.22355316492	3873.81983588058	3715.34405152106	2363.25854759834	0.773214	0.25845
atp5j2	402883	ENSDARG00000037867	439.741924844641	891.460441523043	1299.37706436641	1971.40216879902	1528.3112734713	939.910489998363	0.755038	0.313594
atp5l	326977	ENSDARG00000011841	1139.24290706433	2738.26448324505	3899.09583828435	6382.5238279156	5676.9992810146	2677.20405962648	0.922199	0.22833
atp5o	335191	ENSDARG00000001788	2331.02135382248	5326.50033626635	6560.55190405044	6640.00119348078	6086.16109663381	5446.85833138395	0.35407	0.654164
atp5s	393187	ENSDARG00000012072	137.176131422775	124.862537412022	181.353294803923	203.067054351402	294.054827300807	153.120663841946	0.552354	0.455332
atp6ap1a	100004566	ENSDARG00000041417	1559.52722461496	698.843038848683	1078.47331697227	191.407701948451	247.625117726996	758.862157908514	-1.47794	0.0549085
atp6ap1b	195824	ENSDARG00000037153	348.291170562791	435.566990972171	503.544786636426	403.219270602066	667.427075123543	654.855669261154	0.422552	0.51601
atp6ap1la	100000415	ENSDARG00000091509	127.44732777577	43.5566990972171	30.8686459240721	16.517415904181	20.3129979385426	58.7444056248977	-1.07847	0.426597
atp6ap1lb	561786	ENSDARG00000090963	901.860098077395	277.794947575585	218.974457023886	60.2399874152485	46.4297095738117	238.829714671715	-2.01716	0.0411996
atp6ap2	406296	ENSDARG00000008735	2744.49550882021	2033.61388451674	2581.39051540053	686.930179073882	1474.14327896852	2657.94359876586	-0.610857	0.452481
atp6v0a1a	324307	ENSDARG00000020847	1093.5175299234	687.227919089425	411.903494049337	359.496699090999	357.895677964798	510.402212806488	-0.836573	0.203271
atp6v0a1b	553691	ENSDARG00000015174	2445.82123685714	973.734206484453	2806.15284353518	189.464476547959	354.993821116435	1205.70484987495	-1.83072	0.0362576
atp6v0a2a	561469	ENSDARG00000035538	351.209811656893	151.964483516957	244.055231837195	36.9212826093458	41.5932814932063	126.156018637075	-1.86808	0.0203988
atp6v0a2b	561117	ENSDARG00000113695	153.715097622684	198.424962553989	151.449294064979	78.7006287199214	101.564989692713	226.310415112311	-0.308638	0.769493
atp6v0b	321724	ENSDARG00000031681	1664.59830400261	1197.32526185017	1608.06352360713	388.645080098377	915.052192850538	1168.14695119674	-0.854664	0.198211
atp6v0ca	192336	ENSDARG00000057853	3207.58656241766	4058.51642921403	4541.5495315791	4091.46108073567	4612.98510328141	5711.68966821751	0.287962	0.618508
atp6v0cb	325402	ENSDARG00000036577	5951.10919087317	3291.91852510301	5250.56374264764	1106.66686558013	1713.06282615043	3212.64487155178	-1.26461	0.0396372
atp6v0d1	322811	ENSDARG00000115876	835.704233277759	636.895733465975	1325.42248436484	404.190883302312	622.931936781973	730.934489660612	-0.670417	0.306619
atp6v0e1	450017	ENSDARG00000101794	116.745643764064	326.191279905826	194.858327395705	405.162496002558	786.403205906435	634.632185357501	1.51766	0.015862
atp6v1aa	394110	ENSDARG00000113437	757.873804101716	684.324139149611	1469.15461694881	347.837346688048	619.062794317489	975.542342590514	-0.583806	0.485965
atp6v1ab	337583	ENSDARG00000112815	208.196398045914	204.232522433618	469.782205156972	94.2464319238565	142.190985569798	269.646452048711	-0.801713	0.369611
atp6v1b2	359840	ENSDARG00000043465	517.572354020684	319.415793379592	932.811894018053	75.7857906191836	80.2847061380494	221.495299897155	-2.22871	0.00221344
atp6v1ba	359839	ENSDARG00000111525	1207.34453259336	822.737649614101	1042.78144512256	483.86312472248	641.310363488274	1759.44309961784	-0.0911854	0.940363
atp6v1c1a	368907	ENSDARG00000023967	507.843550373679	337.806399665084	559.494207373806	151.571581238367	319.204253319955	523.884535408924	-0.498403	0.58336
atp6v1c1b	449655	ENSDARG00000112507	163.44390126969	228.430688598739	405.150977753446	192.379314648697	190.555266375852	266.757382919617	-0.294891	0.749911
atp6v1c2	100538220	ENSDARG00000070440	3.89152145880214	4.83963323302412	0	18.4606413046729	0	0.963023043031109	1.15355	1
atp6v1d	393935	ENSDARG00000011175	433.904642656438	434.599064325566	673.322339218822	337.149606985342	520.399661473139	529.66267366711	-0.152449	0.852836
atp6v1e1b	192335	ENSDARG00000030694	945.639714488919	1130.53832323443	2459.84522207449	913.315938231187	1578.6101255096	1433.94131107332	-0.20842	0.82694
atp6v1f	436799	ENSDARG00000045543	521.463875479486	584.627694549314	1249.21551473979	518.841181931334	866.687912044485	677.00519925087	-0.191507	0.839508
atp6v1g1	335025	ENSDARG00000110951	1298.79528687521	971.798353191244	1818.35617396487	410.020559503788	834.767486712489	1451.27572584788	-0.600862	0.476712
atp6v1h	286779	ENSDARG00000006370	1005.95829710035	765.629977464416	1428.63951917346	742.312102987901	853.14591341879	1266.37530158591	-0.161229	0.846572
atp7a	564924	ENSDARG00000003699	81.7219506348448	50.3321856234509	44.3736785158536	112.707073228529	58.0371369672646	58.7444056248977	0.379358	0.741752
atp7b	556499	ENSDARG00000058145	35.9965734939198	36.7812125709833	31.8332911091993	10.6877397027054	35.7895677964798	14.4453456454666	-0.779926	0.586269
atp8a1	767630	ENSDARG00000063001	137.176131422775	69.6907185555474	61.7372918481442	0.971612700245943	22.2475691707848	33.7058065060888	-2.23801	0.0912716
atp8a2	100330943	ENSDARG00000110095	111.881241940561	104.536077833321	79.1009051804347	39.8361207100837	63.8408506639911	68.3746360552088	-0.780274	0.335661
atp8b1	100148342	ENSDARG00000060980	33.0779323998182	45.4925523904268	65.5958725886532	57.3251493145106	25.149426019148	28.8906912909333	-0.37265	0.786209
atp8b2	323754	ENSDARG00000115821	98.2609168347539	121.958757472208	293.252136278685	125.338038331727	128.648986944103	186.826470348035	-0.220148	0.84903
atp8b3	566530	ENSDARG00000042285	91.4507542818502	41.6208458040075	101.287744438361	93.2748192236105	87.0557054508969	52.966267366711	-0.00661667	0.997032
atp8b4	559291	ENSDARG00000079453	34.0508127645187	10.6471931126531	8.68180666614527	80.6438541204133	0	9.63023043031109	0.758022	0.795526
atp8b5a	100330945	ENSDARG00000062040	88.5321131877486	120.022904178998	39.5504525902173	225.414146457059	272.774543746144	283.128774651146	1.65503	0.0107735
atp8b5b	563450	ENSDARG00000104450	20.4304876587112	15.4868263456772	54.9847755522534	0	22.2475691707848	27.9276682479022	-0.857209	0.727147
atp9a	101886226	ENSDARG00000115869	50.5897789644278	52.2680389166605	33.7625814794538	28.1767683071324	24.1821404030269	31.7797604200266	-0.699245	0.527059
atp9b	568160	ENSDARG00000062521	109.93548121116	76.4662050817811	58.8433562927624	126.309651031973	77.3828492896861	63.5595208400532	0.123973	0.918814
atpaf1	550606	ENSDARG00000042799	262.677698469144	328.127133199035	478.464011823117	303.143162476734	326.942538248924	421.804092847626	-0.0236521	0.98053
atpaf2	560253	ENSDARG00000115757	207.223517681214	250.69300147065	261.418845169485	127.281263732219	83.1865629864126	210.902046423813	-0.771534	0.288744
atpif1a	100037369	ENSDARG00000067975	250.030253728037	679.484505916587	783.291890323329	1256.295221418	1217.81259069644	976.505365633545	1.01047	0.123166
atpif1b	558368	ENSDARG00000112469	292.836989774861	529.455875692839	957.892668831362	898.741747727497	674.19807443639	543.144996269546	0.24934	0.803526
atpv0e2	553767	ENSDARG00000059057	1202.48013076986	724.977058307014	984.902734014925	133.110939933694	235.050404717422	525.810581494986	-1.70384	0.011731
atr	567770	ENSDARG00000079625	153.715097622684	143.253143697514	173.636133322905	232.21543535878	185.718838295247	205.123908165626	0.404825	0.536392
atraid	553468	ENSDARG00000043388	212.087919504716	123.894610765418	270.100651835631	32.0632191081161	186.686123911368	192.604608606222	-0.559083	0.65151
atrip	558534	ENSDARG00000063076	123.555806316968	172.290943095659	109.969551104507	40.8077334103296	128.648986944103	160.824848186195	-0.297043	0.808913
atrn	794975	ENSDARG00000110632	124.528686681668	78.4020583749908	84.8887762911982	120.479974830497	64.8081362801121	107.858580819484	0.0264953	0.983101
atrnl1a	792417	ENSDARG00000077188	230.572646434027	157.772043396586	148.555358509597	60.2399874152485	98.6631328443498	69.3376590982399	-1.23404	0.0466858
atrnl1b	569196	ENSDARG00000006420	1149.94459107603	1012.45127234865	1230.88725622237	686.930179073882	810.585346309462	914.871890879554	-0.49221	0.301953
atrx	323299	ENSDARG00000112921	4814.78492490294	6140.52664606101	5715.52272187897	6301.87997379519	7848.55548920642	6880.79964245728	0.335207	0.499392
atxn10	100034473	ENSDARG00000008439	95.3422757406523	100.664371246902	71.3837436994167	0	27.0839972513901	104.969511690391	-1.01769	0.624721
atxn1a	557340	ENSDARG00000115198	316.186118527674	455.893450550872	350.166202201193	569.365042344123	458.49338204139	456.472922396746	0.403405	0.496141
atxn1b	565841	ENSDARG00000060862	315.213238162973	283.602507455214	319.297556277121	185.578025746975	112.205131470045	156.00973297104	-1.01666	0.0492033
atxn1l	793927	ENSDARG00000086977	95.3422757406523	133.573877231466	65.5958725886532	102.019333525824	157.667555427735	58.7444056248977	0.112642	0.931431
atxn2	569210	ENSDARG00000115860	277.270903939652	356.197005950575	299.040007389448	426.537975407969	381.110532751704	306.241327683893	0.256391	0.703464
atxn2l	324525	ENSDARG00000112336	707.284025137288	922.434094214398	854.675634022746	679.157277471914	1068.85060581379	1049.69511690391	0.171354	0.81127
atxn3	394079	ENSDARG00000099274	141.067652881577	202.296669140408	137.944261473197	426.537975407969	231.181262252937	178.159262960755	0.796287	0.273931
atxn7	100001490	ENSDARG00000074804	518.545234385385	532.359655632653	477.49936663799	643.207607562814	408.194530003094	528.699650624079	0.0479847	0.95338
atxn7l1	100536590	ENSDARG00000089860	80.7490702701443	60.0114520894991	42.4443881455991	110.763847828038	78.3501349058072	80.8939356146132	0.559608	0.544744
atxn7l2a	692316	ENSDARG00000116622	255.86753591624	344.581886191317	147.59071332447	467.345708818299	363.699391661525	361.133641136666	0.672424	0.319835
atxn7l2b	436928	ENSDARG00000056268	323.969161445278	290.377993981447	290.358200723303	487.749575523463	417.867386164305	304.315281597831	0.41939	0.495871
atxn7l3	368510	ENSDARG00000029331	237.38280898693	204.232522433618	242.12594146694	230.272209958289	274.709114978386	289.869935952364	0.217255	0.75582
auh	445182	ENSDARG00000042975	263.650578833845	293.281773921262	362.706589607847	177.805124145008	307.596825926502	283.128774651146	-0.258952	0.739377
aunip	103909277		79.7761899054438	102.600224540111	95.499873327598	65.0980509164782	36.7568534126009	67.4116130121777	-0.71516	0.399458
aup1	324654	ENSDARG00000092609	583.72821882032	654.318413104861	541.165948856389	295.370260874767	455.591525193027	876.35096915831	-0.128718	0.899295
aurka	445246	ENSDARG00000012485	338.562366915786	484.931249949017	320.262201462248	811.296604705363	550.385515572893	490.178728902835	0.69518	0.223235
aurkaip1	100126015	ENSDARG00000074985	228.626885704625	406.529191574026	591.327498483006	410.020559503788	480.740951212175	425.65618501975	0.102059	0.9162
aurkb	791894	ENSDARG00000037640	441.687685574042	482.995396655807	443.736785158536	611.144388454698	496.217521070112	745.379835306079	0.43716	0.424116
auts2a	368890	ENSDARG00000116439	1988.56746544789	2489.50733506761	2531.22896577391	729.681137884703	911.183050386054	1511.94617755884	-1.15262	0.019528
auts2b	100150849	ENSDARG00000020946	745.226359360609	575.916354729871	680.074855514713	14.5741905036891	97.6958472282287	156.972756014071	-2.89378	0.000557328
aven	692323	ENSDARG00000002894	255.86753591624	269.083607756141	394.539880717046	297.313486275259	347.255536187466	275.424590306897	0.00075586	0.999792
avil	678618	ENSDARG00000059342	65.1829844349358	35.8132859243785	28.9393555538176	105.905784326808	39.6587102609641	35.631852592151	0.479756	0.729843
avl9	751682	ENSDARG00000055538	448.497848126946	288.442140688238	286.499619982794	438.19732781092	430.442099173879	361.133641136666	0.264987	0.709295
avp	352922	ENSDARG00000058567	4.86440182350267	4.83963323302412	90.6766474019617	0	0.967285616121077	0	-6.59331	0.00867777
avpr1aa	571591	ENSDARG00000077083	18.4847269293101	7.7434131728386	3.85858074050901	14.5741905036891	9.67285616121077	4.81511521515555	-0.0499008	1
avpr1ab	555939	ENSDARG00000045788	29.186410941016	30.9736526913544	3.85858074050901	98.1328827248403	136.387271873072	141.564387325573	2.55477	0.0074742
avpr2aa	100007585	ENSDARG00000007436	79.7761899054438	69.6907185555474	68.4898081440349	0	18.3784267063005	6.74116130121777	-3.11687	0.0210072
avpr2ab	100151502	ENSDARG00000029219	51.5626593291283	45.4925523904268	15.434322962036	16.517415904181	33.8549965642377	18.2974378175911	-0.711915	0.630271
avpr2l	100004053	ENSDARG00000076690	14.593205470508	14.5188996990724	3.85858074050901	30.1199937076242	15.4765698579372	7.70418434424888	0.692987	1
axdnd1	557839	ENSDARG00000062355	28.2135305763155	43.5566990972171	49.1969044414899	12.6309651031973	13.5419986256951	7.70418434424888	-1.83647	0.08641
axin1	57931	ENSDARG00000102964	1308.52409052222	1555.45812109395	1773.98249544902	1037.68236386267	1424.81171254635	1366.52969806114	-0.276514	0.639345
axin2	58080	ENSDARG00000100149	784.14157394863	916.626534334769	937.635119943689	488.721188223709	494.28294983787	517.143374107706	-0.814563	0.0389678
axl	100330721	ENSDARG00000112045	42.8067360468235	45.4925523904268	22.1868392579268	32.0632191081161	9.67285616121077	21.1865069466844	-0.812263	0.569998
azi2	406377	ENSDARG00000102419	74.9117880819411	45.4925523904268	30.8686459240721	31.0916064078702	26.1167116352691	26.00162216184	-0.862253	0.435688
azin1a	550230	ENSDARG00000052789	72.96602735254	146.156923637329	66.5605177737804	259.420590965667	474.937237515449	248.459945102026	1.7825	0.00547598
azin1b	317764	ENSDARG00000115647	2119.90631468246	2332.70321831763	2871.74871612383	2618.49622716282	2890.24942096978	2587.64291662459	0.144573	0.812964
b2m	30400	ENSDARG00000053136	102.152438293556	176.162649682078	94.5352281424707	347.837346688048	97.6958472282287	354.392479835448	1.10127	0.196165
b2ml	791742	ENSDARG00000015887	1887.38790751904	4032.3824097557	3408.09143905458	8019.69122783002	5914.95154258038	4354.79020058668	0.971388	0.0852036
b3galnt2	553716	ENSDARG00000046133	99.2337971994545	156.804116749982	95.499873327598	137.969003434924	87.0557054508969	175.270193831662	0.187406	0.857898
b3galt1a	559521	ENSDARG00000079700	143.013413610978	120.022904178998	147.59071332447	34.978057208854	35.7895677964798	51.0402212806488	-1.7531	0.00332459
b3galt1b	571003		39.8880949527219	20.3264595787013	30.8686459240721	0	22.2475691707848	2.88906912909333	-1.85729	0.387789
b3galt2	404633	ENSDARG00000114032	978.717646888737	686.259992442821	497.756915525662	322.575416481653	476.871808747691	468.99222195615	-0.769769	0.185301
b3galt4	101886595	ENSDARG00000076218	39.8880949527219	12.5830464058627	6.75251629589077	0	0	4.81511521515555	-3.61868	1
b3galt6	572324	ENSDARG00000038414	16.5389661999091	20.3264595787013	8.68180666614527	20.4038667051648	0.967285616121077	1.92604608606222	-0.967633	1
b3gat1a	548607	ENSDARG00000112270	578.863816996818	273.923240989165	515.120528857953	155.458032039351	110.270560237803	191.641585563191	-1.58051	0.00520511
b3gat1b	100332644	ENSDARG00000113928	53.5084200585294	12.5830464058627	35.6918718497083	0	12.574713009574	23.1125530327466	-1.51167	0.475088
b3gat2	445060	ENSDARG00000030733	484.494421620866	404.593338280817	764.963631805911	177.805124145008	355.961106732556	284.091797694177	-1.01607	0.0936296
b3gat3	192334	ENSDARG00000001939	43.779616411524	33.8774326311689	35.6918718497083	4.85806350122972	21.2802835546637	25.0385991188088	-1.1469	0.404622
b3glcta	799443	ENSDARG00000073917	142.040533246278	182.938136208312	211.257295542868	224.442533756813	155.732984195493	129.045087766169	-0.0746616	0.942139
b3glctb	564156	ENSDARG00000110421	24.3220091175133	12.5830464058627	20.2575488876723	13.6025778034432	5.80371369672646	13.4823226024355	-0.797438	1
b3gnt2a	405766	ENSDARG00000052376	35.0236931292192	36.7812125709833	18.3282585174178	7.77290160196755	5.80371369672646	6.74116130121777	-2.14932	0.0823824
b3gnt2b	793362	ENSDARG00000091902	255.86753591624	228.430688598739	220.903747394141	605.314712253223	571.665799127556	564.33150321623	1.30408	0.000624044
b3gnt2l	797513	ENSDARG00000068219	137.176131422775	233.270321831763	480.393302193372	142.827066936154	277.610971826749	545.071042355608	0.182403	0.892544
b3gnt3	561172	ENSDARG00000058100	62.2643433408342	66.7869386157329	43.4090333307264	1452.56098686768	1182.99030851608	926.428167395927	4.36843	7.91991e-23
b3gnt5a	336526	ENSDARG00000018971	329.806443633481	544.942702038516	245.984522207449	1108.61009098062	1241.02744548334	1949.15863909497	1.9395	0.000196922
b3gnt5b	791470	ENSDARG00000004396	35.9965734939198	53.2359655632653	74.2776792547984	28.1767683071324	30.9531397158744	16.3713917315289	-1.11501	0.281116
b3gnt7	286748	ENSDARG00000038489	35.0236931292192	24.1981661651206	25.0807748133086	133.110939933694	166.373125972825	98.2283503891732	2.23818	0.000470809
b3gnt7l	407623	ENSDARG00000053133	146.904935069781	150.028630223748	171.706842952651	27.2051556068864	42.5605671093274	41.4099908503377	-2.07552	0.000283125
b3gnt9	100034499	ENSDARG00000041616	51.5626593291283	14.5188996990724	12.5403874066543	24.2903175061486	12.574713009574	9.63023043031109	-0.757849	0.679257
b3gntl1	619261	ENSDARG00000043431	13.6203251058075	30.9736526913544	3.85858074050901	13.6025778034432	6.77099931284754	20.2234839036533	-0.25505	1
b4galnt1a	558684	ENSDARG00000117038	65.1829844349358	45.4925523904268	57.8787111076351	66.0696636167241	47.3969951899328	49.1141751945866	-0.0520834	0.968718
b4galnt1b	793635	ENSDARG00000114582	34.0508127645187	26.1340194583303	30.8686459240721	11.6593524029513	41.5932814932063	1.92604608606222	-0.722663	0.726762
b4galnt2.1	558078	ENSDARG00000094579	22.3762483881123	19.3585329320965	16.3989681471633	0	0	7.70418434424888	-2.91439	1
b4galnt3a	561505	ENSDARG00000078749	45.7253771409251	27.1019461049351	81.9948407358165	31.0916064078702	26.1167116352691	5.77813825818666	-1.29777	0.336502
b4galnt3b	553524	ENSDARG00000058939	143.013413610978	84.2096182546197	221.868392579268	70.9277271179539	70.6118499768386	64.5225438830843	-1.12397	0.129481
b4galnt4a	565184	ENSDARG00000112006	223.762483881123	121.958757472208	94.5352281424707	33.0348318083621	23.2148547869058	162.750894272257	-1.00726	0.427858
b4galnt4b	559305	ENSDARG00000076701	163.44390126969	81.3058383148053	122.509938511161	4.85806350122972	42.5605671093274	63.5595208400532	-1.72631	0.134404
b4galt1	550425		19.4576072940107	60.0114520894991	90.6766474019617	0	43.5278527254484	59.7074286679288	-0.720769	0.759051
b4galt1l	768123	ENSDARG00000104404	41.833855682123	67.7548652623377	49.1969044414899	83.5586922211511	184.751552679126	113.636719077671	1.26628	0.0912716
b4galt2	100148828	ENSDARG00000077994	461.145292868053	290.377993981447	348.236911830938	45.6657969115593	136.387271873072	224.384369026248	-1.43599	0.0679797
b4galt3	561756	ENSDARG00000112697	115.772763399364	124.862537412022	112.863486659889	13.6025778034432	70.6118499768386	111.710672991609	-0.851267	0.480572
b4galt4	492760	ENSDARG00000104042	32.1050520351176	38.717065864193	35.6918718497083	62.1832128157404	86.0884198347758	43.3360369363999	0.847047	0.375158
b4galt5	724080	ENSDARG00000037815	22.3762483881123	30.9736526913544	9.64645185127252	29.1483810073783	39.6587102609641	20.2234839036533	0.49909	0.758919
b4galt6	393912	ENSDARG00000010301	815.273745619047	1105.37223042271	434.090333307264	867.650141319627	1375.48014612417	1289.48785461866	0.585186	0.40809
b4galt7	445022	ENSDARG00000021899	202.359115857711	214.879715546271	214.15123109825	29.1483810073783	170.242268437309	151.194617755884	-0.848699	0.405068
b4gat1	101669768	ENSDARG00000111962	27.240650211615	33.8774326311689	15.434322962036	62.1832128157404	2.90185684836323	4.81511521515555	-0.131342	0.962782
b9d1	554150	ENSDARG00000011727	81.7219506348448	57.1076721496846	48.2322592563626	53.4386985135269	37.724139028722	44.299059979431	-0.465589	0.661737
b9d2	436667	ENSDARG00000017385	99.2337971994545	92.9209580740632	182.317939989051	80.6438541204133	64.8081362801121	71.2637051843021	-0.789132	0.317014
ba1l	504174	ENSDARG00000097238	0	4.83963323302412	0.964645185127252	15.5458032039351	0.967285616121077	0	1.50797	1
baalc	101884762		7.78304291760427	7.7434131728386	0.964645185127252	0.971612700245943	1.93457123224215	0.963023043031109	-2.09138	1
babam1	445296	ENSDARG00000077526	330.779323998182	314.576160146568	586.50427255737	375.042502294934	504.923091615202	428.545254148844	0.0870692	0.923583
babam2	550474	ENSDARG00000038863	305.484434515968	419.112237979889	523.802335524098	660.696636167241	717.725927161839	528.699650624079	0.611285	0.275358
bace1	403005	ENSDARG00000101716	296.728511233663	176.162649682078	485.216528119008	256.505752864929	296.95668414917	301.426212468737	-0.164464	0.866276
bace2	449818	ENSDARG00000044781	240.301450081032	427.823577799332	260.454199984358	0.971612700245943	264.068973201054	411.210839374284	-0.457445	0.895255
bach1a	678555	ENSDARG00000062553	24.3220091175133	7.7434131728386	10.6110970363998	34.006444508608	22.2475691707848	17.33441477456	0.786185	0.639281
bach1b	553688	ENSDARG00000002196	52.5355396938288	52.2680389166605	69.4544533291622	100.076108125332	123.812558863498	19.2604608606222	0.480523	0.733714
bach2a	557210	ENSDARG00000036569	74.9117880819411	69.6907185555474	33.7625814794538	182.663187646237	100.597704076592	66.4485899691466	0.971338	0.303384
bach2b	555350	ENSDARG00000004074	224.735364245823	133.573877231466	149.520003694724	136.025778034432	205.064550617668	186.826470348035	0.0560365	0.957252
bada	564921	ENSDARG00000087993	591.511261737925	480.091616715993	256.595619243849	1670.20223172278	975.023901050045	847.460277867376	1.39488	0.016782
badb	58100	ENSDARG00000114609	140.094772516877	247.789221530835	232.479489615668	863.763690518643	975.023901050045	581.66591799079	1.96404	4.19423e-05
bag1	558108	ENSDARG00000020895	256.840416280941	264.243974523117	311.580394796103	323.547029181899	373.372247822736	422.767115890657	0.427289	0.454889
bag2	393975	ENSDARG00000035005	34.0508127645187	148.092776930538	74.2776792547984	1310.70553263178	680.969073749238	419.878046761564	3.23331	1.43823e-05
bag3	445139	ENSDARG00000039486	299.647152327764	544.942702038516	72.3483888845439	1220.3455515089	674.19807443639	688.561475767243	1.49422	0.0869221
bag4	100001980	ENSDARG00000043179	176.091346010797	213.911788899666	183.282585174178	61.2116001154944	99.6304184604709	174.307170788631	-0.774351	0.332668
bag5	569580	ENSDARG00000017316	76.8575488113422	52.2680389166605	45.3383237009809	11.6593524029513	40.6259958770852	61.633474753991	-0.614689	0.659444
bag6	83910	ENSDARG00000075892	541.894363138197	701.746818788498	772.680793286929	694.703080675849	922.790477779507	926.428167395927	0.335324	0.575704
bag6l	751663	ENSDARG00000077531	133.284609963973	112.27949100616	93.5705829573435	100.076108125332	72.5464212090807	78.0048664855199	-0.436315	0.598473
bahcc1b	794333	ENSDARG00000080009	2013.86235493011	2222.35958060468	2127.04263320559	3062.52323117521	2957.95941409825	3080.71071465652	0.516288	0.189496
bahd1	564712	ENSDARG00000112121	614.860390490737	684.324139149611	530.554851819989	946.350770039549	836.702057944731	822.421678748568	0.509909	0.277265
baiap2a	678518	ENSDARG00000062799	407.636872809524	363.940419123414	392.610590346792	392.531530899361	394.652531377399	452.620830224621	0.0908036	0.896967
baiap2b	100537012		79.7761899054438	95.8247380138776	109.969551104507	494.550864425185	651.950505265606	283.128774651146	2.32366	1.08673e-05
baiap2l1a	387261	ENSDARG00000029305	56.427061152631	57.1076721496846	75.2423244399257	71.8993398181998	35.7895677964798	59.7074286679288	-0.17349	0.888318
baiap2l1b	550528	ENSDARG00000031119	31.1321716704171	35.8132859243785	30.8686459240721	48.5806350122972	64.8081362801121	26.00162216184	0.510945	0.685497
baiap2l2a	394210	ENSDARG00000016483	41.833855682123	22.262312871911	18.3282585174178	5.82967620147566	3.86914246448431	26.00162216184	-1.20666	0.49842
baiap2l2b	564798	ENSDARG00000060933	31.1321716704171	31.9415793379592	48.2322592563626	71.8993398181998	0	13.4823226024355	-0.382687	0.888318
baiap3	564728	ENSDARG00000079264	57.3999415173315	30.9736526913544	113.828131845016	65.0980509164782	24.1821404030269	12.5192995594044	-0.990307	0.476883
bambia	83496	ENSDARG00000055381	420.284317550631	499.450149648089	341.484395535047	1251.43715791677	1096.9018886813	1115.18068383002	1.45743	0.000138003
bambib	431736	ENSDARG00000099677	273.37938248085	529.455875692839	292.287491093557	908.457874729957	1010.81346884652	704.932867498772	1.26078	0.014505
banf1	334717	ENSDARG00000037009	1576.06619081486	3372.25643677121	3551.82357163854	4659.85451037954	4874.1522196341	4480.94621922375	0.721403	0.20887
banp	553659	ENSDARG00000017562	251.976014457438	205.200449080223	210.292650357741	139.912228835416	180.882410214641	273.498544220835	-0.167456	0.8523
bap1	558885	ENSDARG00000063051	300.620032692465	269.083607756141	283.605684427412	107.8490097273	247.625117726996	253.275060317182	-0.487166	0.537262
bard1	100147913	ENSDARG00000076733	72.96602735254	72.5944984953618	54.0201303671261	33.0348318083621	68.6772787445964	40.4469678073066	-0.489402	0.651662
barhl1a	550407	ENSDARG00000112355	271.433621751449	97.7605913070873	222.833037764395	35.9496699090999	21.2802835546637	55.8553364958043	-2.38813	0.00145747
barhl1b	553186	ENSDARG00000113145	40.8609753174224	19.3585329320965	15.434322962036	26.2335429066405	5.80371369672646	0	-1.23997	0.610061
barhl2	100001699	ENSDARG00000115723	626.534954867144	181.002282915102	795.832277729983	167.117384442302	134.45270064083	915.834913922585	-0.397273	0.794717
barx1	553644	ENSDARG00000007407	431.958881927037	573.012574790056	448.560011084172	46.6374096118053	36.7568534126009	61.633474753991	-3.32506	7.5099e-13
barx2	100002200	ENSDARG00000041098	25.2948894822139	33.8774326311689	22.1868392579268	39.8361207100837	25.149426019148	13.4823226024355	-0.0523758	0.978282
basp1	569631	ENSDARG00000110677	104.098199022957	36.7812125709833	129.262454807052	181.691574945991	88.990276683139	70.300682141271	0.335908	0.798383
batf	564589	ENSDARG00000011818	8.7559232823048	10.6471931126531	13.5050325917815	0	0	9.63023043031109	-1.77206	1
batf3	751677	ENSDARG00000042577	11.6745643764064	20.3264595787013	33.7625814794538	28.1767683071324	41.5932814932063	22.1495299897155	0.482856	0.760057
baxa	58081	ENSDARG00000020623	384.287744056711	522.680389166605	445.666075528791	1363.17261844506	1632.77812001238	1193.18555031554	1.63087	1.76761e-05
baxb	503609	ENSDARG00000030881	128.42020814047	202.296669140408	178.459359248542	505.23860412789	701.282071687781	283.128774651146	1.5487	0.00756831
baz1a	334173	ENSDARG00000099745	1459.3205470508	2313.34468538553	1282.97809621925	2718.57233528815	2268.28476980392	2880.40192170605	0.637968	0.228109
baz1b	571727	ENSDARG00000114866	2161.74017036459	2899.90823322805	1616.74533027328	1494.34033297826	2152.2104958694	2570.30850185003	-0.103308	0.902341
baz2a	450079	ENSDARG00000102974	1960.35393487158	2216.55202072505	2328.65347689719	1572.06934899794	1876.53409527489	2519.26828056938	-0.124452	0.857055
baz2ba	561095	ENSDARG00000057782	3045.11554151267	3410.0055759888	2766.60239094496	3186.88965680669	3466.75164817794	3278.1304384779	0.107016	0.856726
bbc3	751763	ENSDARG00000069282	178.037106740198	204.232522433618	204.504779246978	1304.8758564303	1411.26971392065	405.432701116097	2.41138	5.93342e-05
bbip1	795943	ENSDARG00000116522	286.026827221957	321.351646672802	444.701430343663	596.570197951009	666.459789507422	282.165751608115	0.554511	0.455542
bbox1	572649	ENSDARG00000113482	260.731937739743	282.634580808609	207.398714802359	179.748349545499	244.723260878632	168.529032530444	-0.340319	0.633114
bbs1	568986	ENSDARG00000114301	131.338849234572	112.27949100616	79.1009051804347	68.012889017216	75.448278057444	74.1527743133954	-0.568436	0.479361
bbs10	100034535	ENSDARG00000110925	60.3185826114331	24.1981661651206	49.1969044414899	20.4038667051648	5.80371369672646	21.1865069466844	-1.49632	0.230876
bbs12	570583	ENSDARG00000016112	68.1016255290374	40.6529191574026	52.0908399968716	111.735460528283	85.1211342186547	34.6688295491199	0.525446	0.655412
bbs2	259187	ENSDARG00000110124	271.433621751449	244.885441591021	266.242071095122	157.401257439843	188.62069514361	185.863447305004	-0.557064	0.312786
bbs4	768303	ENSDARG00000063522	95.3422757406523	50.3321856234509	54.9847755522534	53.4386985135269	29.0185684836323	16.3713917315289	-1.02189	0.354238
bbs5	393269	ENSDARG00000039827	168.308303093192	141.317290404304	135.050325917815	13.6025778034432	55.1352801189014	76.0788203994576	-1.61833	0.0685739
bbs7	557491	ENSDARG00000059911	249.057373363337	207.136302373432	177.494714063414	36.9212826093458	93.8267047637444	75.1157973564265	-1.62197	0.0113806
bbs9	100333716	ENSDARG00000113486	178.037106740198	154.868263456772	63.6665822183987	75.7857906191836	81.2519917541704	84.7460277867376	-0.713788	0.419781
bbx	100005540	ENSDARG00000012699	365.803017127401	566.237088263822	401.292397012937	1039.62558926316	1064.98146334931	523.884535408924	0.979183	0.0857063
bc2	798901	ENSDARG00000053979	916.453303547903	1024.0663921079	920.271506611399	3750.42502294934	3792.72690081074	1876.93191086763	1.71932	0.000136151
bcam	767689	ENSDARG00000090190	3490.69474854552	3569.71347267859	5033.518575994	3913.65595659066	6468.23891500164	4122.70164721618	0.262226	0.70117
bcan	334113	ENSDARG00000099412	425.148719374133	427.823577799332	783.291890323329	21.3754794054108	83.1865629864126	113.636719077671	-2.90656	7.87746e-05
bcap29	554151	ENSDARG00000016231	31.1321716704171	38.717065864193	40.5150977753446	45.6657969115593	117.04155955065	71.2637051843021	1.08404	0.235874
bcap31	368488	ENSDARG00000044972	179.009987104898	193.585329320965	134.085680732688	186.549638447221	229.246691020695	236.903668585653	0.36539	0.60426
bcar1	568309	ENSDARG00000056525	707.284025137288	1210.87623490264	867.2160214294	2601.00719855839	2842.85242577984	2196.65556115396	1.45579	0.000445467
bcar3	570610	ENSDARG00000016981	252.948894822139	356.197005950575	292.287491093557	915.259163631678	870.557054508969	703.00682141271	1.46515	0.000274586
bcas2	493614	ENSDARG00000043631	547.731645326401	765.629977464416	748.564663658748	401.276045201575	583.273226521009	884.055153502558	-0.142017	0.870469
bcas3	393594	ENSDARG00000114497	278.243784304353	275.859094282375	335.696524424284	485.806350122972	531.039803250471	244.607852929902	0.503504	0.479281
bcat1	337412	ENSDARG00000045568	304.511554151267	131.638023938256	250.807748133086	22.3470921056567	35.7895677964798	97.2653273461421	-2.14401	0.00984668
bcat2	436949	ENSDARG00000054849	448.497848126946	695.939258908869	1086.19047845329	1161.0771767939	851.211342186547	757.899134865483	0.312509	0.702078
bccip	541348	ENSDARG00000004948	759.819564831117	2117.82350277136	2016.10843691596	2442.6343284183	2384.35904373845	2115.76162553935	0.50456	0.49918
bckdha	554124	ENSDARG00000111762	177.064226375497	157.772043396586	111.898841474761	30.1199937076242	24.1821404030269	200.308792950471	-0.810997	0.561464
bckdhb	569980	ENSDARG00000014676	435.850403385839	675.612799330167	897.120022168345	737.454039486671	797.043347683767	744.416812263048	0.182149	0.81589
bckdhbl	555648	ENSDARG00000093569	381.369102962609	370.715905649648	415.762074789846	93.2748192236105	67.7099931284754	214.754138595937	-1.63596	0.0117934
bckdk	282677	ENSDARG00000016904	754.955163007614	933.081287327051	983.938088829797	1261.15328491923	1242.96201671558	1731.51543136993	0.66467	0.152363
bcl10	100334750	ENSDARG00000077130	33.0779323998182	0.967926646604825	6.75251629589077	21.3754794054108	3.86914246448431	0	-0.692677	1
bcl11aa	678650	ENSDARG00000061352	110.908361575861	100.664371246902	80.0655503655619	110.763847828038	71.5791355929597	89.5611430018932	-0.101075	0.924705
bcl11ab	566491	ENSDARG00000063153	1239.44958462848	983.413472950502	1229.92261103725	26.2335429066405	237.952261565785	376.542009825164	-2.42993	0.0073736
bcl11ba	100093707	ENSDARG00000062510	2266.81124975224	1030.84187863414	2668.20858206198	143.7986796364	495.250235453991	889.833291760745	-1.96423	0.0137193
bcl2a	570772	ENSDARG00000094704	260.731937739743	522.680389166605	318.332911091993	572.279880444861	679.034502516996	539.292904097421	0.700645	0.237497
bcl2b	100007048	ENSDARG00000089109	109.93548121116	57.1076721496846	269.136006650503	45.6657969115593	94.7939903798655	93.4132351740176	-0.899185	0.405647
bcl2l1	114401	ENSDARG00000008434	349.264050927492	613.665493947459	419.620655530355	774.375322096017	761.253779887287	891.759337846807	0.812067	0.104439
bcl2l10	373113	ENSDARG00000026766	916.453303547903	1306.70097291651	1191.33680363216	9217.68968723326	9486.1700372994	5940.88915245891	2.85153	3.91664e-13
bcl2l11	100190951	ENSDARG00000079144	8.7559232823048	2.90377993981447	3.85858074050901	5.82967620147566	9.67285616121077	6.74116130121777	0.519764	1
bcl2l13	559355	ENSDARG00000111116	613.887510126037	632.05610023295	470.746850342099	383.787016597148	449.787811496301	512.32825889255	-0.351028	0.554185
bcl2l16	100359374	ENSDARG00000114237	17.5118465646096	24.1981661651206	8.68180666614527	6.8012889017216	17.4111410901794	1.92604608606222	-0.947089	1
bcl3	565656	ENSDARG00000087832	101.179557928856	141.317290404304	42.4443881455991	620.860515457158	1045.63575102688	618.260793625972	3.00336	7.38399e-07
bcl6a	393707	ENSDARG00000116260	328.83356326878	342.646032898108	233.444134800795	207.925117852632	190.555266375852	441.064553708248	-0.108135	0.917427
bcl6ab	100001936	ENSDARG00000069295	185.820149657802	172.290943095659	160.131100731124	222.499308356321	159.602126659978	220.532276854124	0.217671	0.778434
bcl6b	793278	ENSDARG00000114369	36.9694538586203	17.4226796388868	44.3736785158536	5900.60392859361	6841.61116282437	5538.34552047191	7.53202	1.21683e-46
bcl7a	57952	ENSDARG00000111533	1146.05306961723	1058.91175138568	1692.95229989833	869.593366720119	795.108776451525	1056.43627820513	-0.518494	0.344581
bcl7ba	406444	ENSDARG00000111877	83.6677113642459	78.4020583749908	76.2069696250529	36.9212826093458	138.321843105314	163.713917315289	0.50855	0.6646
bcl7bb	81595	ENSDARG00000116093	263.650578833845	382.331025408906	380.070202940137	224.442533756813	332.74625194565	428.545254148844	-0.0578172	0.952937
bcl9	449616	ENSDARG00000036687	1101.300572841	1058.91175138568	1174.93783548499	862.792077818398	1304.86829614733	935.095374783207	-0.1042	0.881636
bcl9l	449532	ENSDARG00000055054	338.562366915786	376.523465529277	411.903494049337	316.745740280177	338.549965642377	343.799226362106	-0.173787	0.792194
bco1	84039	ENSDARG00000104256	160.525260175588	207.136302373432	210.292650357741	182.663187646237	236.017690333543	110.747649948578	-0.126572	0.898666
bco1l	393580	ENSDARG00000103659	15.5660858352085	26.1340194583303	20.2575488876723	53.4386985135269	25.149426019148	2.88906912909333	0.394892	0.857898
bco2a	793849	ENSDARG00000055722	16.5389661999091	14.5188996990724	3.85858074050901	0	3.86914246448431	16.3713917315289	-0.786121	1
bco2b	678554	ENSDARG00000041715	62.2643433408342	74.5303517885715	38.5858074050901	13.6025778034432	19.3457123224215	20.2234839036533	-1.72158	0.0573487
bco2l	84041	ENSDARG00000027620	24.3220091175133	76.4662050817811	44.3736785158536	48.5806350122972	7.73828492896861	26.00162216184	-0.818499	0.597899
bcor	402921	ENSDARG00000017798	1573.14754972076	1515.77312858316	1352.43254954841	934.691417636597	1803.02038844969	1460.90595627819	-0.0810759	0.919192
bcorl1	792710	ENSDARG00000077912	293.809870139561	261.340194583303	279.747103686903	220.556082955829	186.686123911368	203.197862079564	-0.451753	0.426491
bcr	568320	ENSDARG00000079286	295.755630868962	89.0492514876439	137.944261473197	131.167714533202	34.8222821803588	83.7830047437065	-1.06551	0.293058
bcs1l	394157	ENSDARG00000012295	102.152438293556	130.670097291651	172.671488137778	0	127.681701327982	83.7830047437065	-0.939225	0.638526
bdh1	100037356	ENSDARG00000059388	51.5626593291283	40.6529191574026	49.1969044414899	121.451587530743	76.415563673565	67.4116130121777	0.907544	0.267738
bdh2	550507	ENSDARG00000052696	87.559232823048	228.430688598739	306.757168870466	322.575416481653	276.643686210628	280.239705522053	0.497909	0.586556
bdkrb1	368199	ENSDARG00000020744	19.4576072940107	2.90377993981447	1.9292903702545	0.971612700245943	0	0	-4.546	1
bdkrb2	100330960		11.6745643764064	20.3264595787013	0.964645185127252	0	11.6074273934529	19.2604608606222	-0.0945691	1
bdnf	58118	ENSDARG00000018817	634.317997784748	411.36882480705	488.11046367439	138.94061613517	185.718838295247	312.982488985111	-1.26622	0.0276194
bean1	101885923	ENSDARG00000087413	17.5118465646096	14.5188996990724	12.5403874066543	16.517415904181	0	22.1495299897155	-0.204914	1
becn1	393846	ENSDARG00000079128	231.545526798727	151.964483516957	120.580648140907	101.047720825578	180.882410214641	244.607852929902	0.0629536	0.958911
bend3	565716	ENSDARG00000076903	255.86753591624	285.538360748423	223.797682949523	377.957340395672	302.760397845897	361.133641136666	0.44524	0.435328
bend4	566937	ENSDARG00000113607	17.5118465646096	14.5188996990724	12.5403874066543	8.74451430221349	8.70557054508969	2.88906912909333	-1.13209	1
bend5	566161	ENSDARG00000075624	40.8609753174224	24.1981661651206	6.75251629589077	4.85806350122972	19.3457123224215	7.70418434424888	-1.17008	0.534965
best1	560608	ENSDARG00000078331	39.8880949527219	29.0377993981447	20.2575488876723	21.3754794054108	59.0044225833857	46.2251060654933	0.505686	0.720164
best2	567214	ENSDARG00000079163	28.2135305763155	31.9415793379592	14.4696777769088	26.2335429066405	7.73828492896861	7.70418434424888	-0.840679	0.630585
best4	563711	ENSDARG00000078455	28.2135305763155	36.7812125709833	26.0454199984358	35.9496699090999	31.9204253319955	23.1125530327466	-0.000993269	0.999792
bet1	415135	ENSDARG00000113480	47.6711378703262	120.022904178998	159.166455545997	132.139327233448	153.798412963251	89.5611430018932	0.200028	0.870311
bet1l	445493	ENSDARG00000032037	126.474447411069	213.911788899666	272.994587391012	275.938006869848	392.717960145157	216.680184682	0.529386	0.502486
bfsp1	560018		21.4033680234117	20.3264595787013	9.64645185127252	12.6309651031973	30.9531397158744	5.77813825818666	-0.0576594	0.981684
bfsp2	494090	ENSDARG00000011998	24.3220091175133	14.5188996990724	9.64645185127252	11.6593524029513	39.6587102609641	6.74116130121777	0.260034	0.910778
bglapl	337724	ENSDARG00000104467	35.9965734939198	61.9473053827088	8.68180666614527	0.971612700245943	13.5419986256951	12.5192995594044	-1.9794	0.25754
bgna	431774	ENSDARG00000017884	109.93548121116	174.226796388868	84.8887762911982	45.6657969115593	29.0185684836323	25.0385991188088	-1.88798	0.00947973
bgnb	792197	ENSDARG00000110495	212.087919504716	214.879715546271	364.635879978101	205.98189245214	201.195408153184	194.530654692284	-0.395754	0.58661
bhlha15	777671	ENSDARG00000045166	11.6745643764064	9.67926646604825	3.85858074050901	9.71612700245943	5.80371369672646	0	-0.700301	1
bhlha9	323481	ENSDARG00000113055	9.72880364700534	7.7434131728386	0.964645185127252	21.3754794054108	2.90185684836323	9.63023043031109	0.879187	1
bhlhe22	393930	ENSDARG00000058039	267.542100292647	117.119124239184	278.782458501776	15.5458032039351	97.6958472282287	767.529365295794	0.408825	0.837468
bhlhe23	559796	ENSDARG00000037588	709.229785866689	314.576160146568	214.15123109825	17.489028604427	123.812558863498	505.587097591332	-0.936316	0.540452
bhlhe40	324413	ENSDARG00000004060	2049.85892842403	1923.27024680379	2519.65322355238	1616.76353320925	2421.11589715105	2691.64940527195	0.0516725	0.94955
bhlhe41	563771	ENSDARG00000112123	58.372821882032	174.226796388868	153.378584435233	66.0696636167241	109.303274621682	128.082064723138	-0.347036	0.760719
bhmt	322228	ENSDARG00000013430	1501.15440273292	3380.96777659065	2350.84031615511	171.003835243286	250.526974575359	501.735005419208	-2.96973	5.61289e-07
bicc1a	568201	ENSDARG00000061682	88.5321131877486	110.34363771295	41.4797429604719	28.1767683071324	34.8222821803588	18.2974378175911	-1.56395	0.0838125
bicc1b	571411	ENSDARG00000070497	979.690527253438	1501.25422888408	650.170854775768	126.309651031973	224.41026294009	126.156018637075	-2.71499	4.20985e-07
bicc2	402785	ENSDARG00000076557	43.779616411524	41.6208458040075	53.0554851819989	24.2903175061486	19.3457123224215	4.81511521515555	-1.51516	0.207827
bicd1a	556758	ENSDARG00000113004	57.3999415173315	57.1076721496846	38.5858074050901	46.6374096118053	46.4297095738117	6.74116130121777	-0.617308	0.691785
bicd2	557383	ENSDARG00000075571	249.057373363337	197.457035907384	121.545293326034	265.250267167143	313.400539623229	267.720405962648	0.575305	0.399099
bicdl1	100537719	ENSDARG00000074761	59.3457022467326	53.2359655632653	9.64645185127252	21.3754794054108	12.574713009574	26.00162216184	-1.02755	0.498414
bicra	386775	ENSDARG00000061159	926.182107194908	765.629977464416	653.06479033115	590.740521749533	458.49338204139	680.857291422994	-0.438646	0.442454
bicral	559084	ENSDARG00000016089	251.976014457438	210.040082313247	193.893682210578	322.575416481653	220.541120475605	155.046709928009	0.0900376	0.927078
bida	559425	ENSDARG00000112031	141.067652881577	152.932410163562	129.262454807052	403.219270602066	556.189229269619	370.763871566977	1.65199	0.000181216
bik	564030	ENSDARG00000045549	160.525260175588	342.646032898108	382.964138495519	313.83090217944	209.900978698274	162.750894272257	-0.36837	0.691785
bin1b	447863	ENSDARG00000058820	104.098199022957	120.022904178998	53.0554851819989	136.025778034432	138.321843105314	102.080442561298	0.441603	0.636962
bin2a	492780	ENSDARG00000003219	25.2948894822139	22.262312871911	64.6312274035259	59.2683747150025	23.2148547869058	71.2637051843021	0.454532	0.762623
bin2b	327387	ENSDARG00000010255	52.5355396938288	169.387163155844	143.732132583961	437.225715110674	613.259080620763	653.892646218123	2.22062	0.000256907
bin3	323976	ENSDARG00000099651	430.013121197636	511.065269407347	780.397954767947	1146.50298629021	1465.43770842343	705.895890541803	0.946575	0.106254
birc2	373107	ENSDARG00000117094	1316.30713343982	1662.89797886709	1829.9319161864	2572.83043025126	2526.55002930825	2025.23745949442	0.567026	0.217708
birc5a	373110	ENSDARG00000075621	268.514980657347	537.199288865678	572.034594780461	851.132725415446	856.047770267153	615.371724496879	0.753367	0.215931
birc6	796547	ENSDARG00000115931	798.734779419138	1026.00224540111	691.65059773624	961.896573243484	1005.0097551498	1362.67760588902	0.403999	0.488201
birc6-as2	101885944	ENSDARG00000097706	155.660858352085	115.183270945974	290.358200723303	0	32.8877109481166	59.7074286679288	-2.59933	0.0664059
birc7	100073331	ENSDARG00000109504	15.5660858352085	7.7434131728386	3.85858074050901	39.8361207100837	9.67285616121077	23.1125530327466	1.41877	0.407711
bivm	555455		26.2677698469144	20.3264595787013	22.1868392579268	4.85806350122972	0	10.5932534733422	-2.15388	1
blcap	57918	ENSDARG00000052073	632.372237055347	1000.83615258939	1011.91279919849	1825.66026376213	1892.01066513283	1331.86086851202	0.932801	0.048572
blf	503516	ENSDARG00000043126	38.9152145880214	86.1454715478294	73.3130340696712	1709.06673973261	273.741829362265	1831.66982784517	4.26513	1.22826e-07
blk	567764	ENSDARG00000007783	18.4847269293101	15.4868263456772	57.8787111076351	74.8141779189376	49.3315664221749	127.119041680106	1.4517	0.182728
blm	572540	ENSDARG00000077089	174.145585281396	250.69300147065	152.413939250106	213.754794054107	75.448278057444	200.308792950471	-0.237861	0.826901
blmh	336541	ENSDARG00000025977	389.152145880214	513.001122700557	596.150724408642	584.910845548058	851.211342186547	716.489144015145	0.522745	0.35316
blnk	405764	ENSDARG00000042722	49.6168985997272	41.6208458040075	54.9847755522534	0	58.0371369672646	46.2251060654933	-0.487861	0.837387
bloc1s1	556597	ENSDARG00000014171	116.745643764064	192.61740267436	224.76232813465	185.578025746975	216.671978011121	145.416479497698	0.0360518	0.9738
bloc1s2	606665	ENSDARG00000046081	137.176131422775	182.938136208312	253.701683688467	221.527695656075	236.984975949664	259.053198575368	0.322483	0.676268
bloc1s3	553529	ENSDARG00000068828	71.020266623139	88.081324841039	86.8180666614527	44.6941842113134	95.7612759959866	104.00648864736	-0.0085109	0.995475
bloc1s4	445081	ENSDARG00000007597	197.494714034208	210.040082313247	259.489554799231	124.366425631481	190.555266375852	358.244572007573	0.0132668	0.992618
bloc1s5	324781	ENSDARG00000111747	81.7219506348448	112.27949100616	158.201810360869	193.350927348943	186.686123911368	132.897179938293	0.542265	0.490589
bloc1s6	791215	ENSDARG00000042933	231.545526798727	390.074438581744	407.080268123701	507.181829528382	524.268803937623	495.956867161021	0.57023	0.328638
blvra	767661	ENSDARG00000059857	22.3762483881123	17.4226796388868	24.1161296281813	60.2399874152485	11.6074273934529	31.7797604200266	0.697067	0.660141
blvrb	436959	ENSDARG00000096829	128.42020814047	100.664371246902	152.413939250106	146.713517737137	171.209554053431	178.159262960755	0.378904	0.613947
blzf1	114452	ENSDARG00000011299	207.223517681214	244.885441591021	303.863233315085	536.330210535761	353.059249884193	348.614341577262	0.711561	0.211883
bmb	559540	ENSDARG00000096603	59.3457022467326	120.022904178998	48.2322592563626	53.4386985135269	51.2661376544171	38.5209217212444	-0.668263	0.524596
bmf1	571949	ENSDARG00000090234	2.9186410941016	0	0	21.3754794054108	2.90185684836323	7.70418434424888	3.45578	1
bmf2	751764	ENSDARG00000116024	167.335422728492	192.61740267436	210.292650357741	444.027004012396	546.516373108408	386.172240255475	1.27154	0.0039523
bmi1a	321505	ENSDARG00000006010	317.158998892374	235.206175124972	349.201557016065	93.2748192236105	139.289128721435	260.979244661431	-0.869184	0.238495
bmi1b	394249	ENSDARG00000013076	486.440182350267	397.817851754583	632.807241443478	217.641244855091	285.349256755718	406.395724159128	-0.738289	0.218392
bmp10	562533	ENSDARG00000061769	35.0236931292192	12.5830464058627	23.1514844430541	25.2619302063945	33.8549965642377	29.8537143339644	0.33058	0.836962
bmp10l	571601		36.9694538586203	31.9415793379592	7.71716148101802	0	1.93457123224215	9.63023043031109	-2.72711	1
bmp15	334183	ENSDARG00000037491	23.3491287528128	9.67926646604825	7.71716148101802	0	34.8222821803588	5.77813825818666	-0.00498534	1
bmp16	100329171	ENSDARG00000103679	75.8846684466416	31.9415793379592	37.6211622199628	339.092832385834	483.642808060538	814.717494404319	3.49308	2.25293e-08
bmp1a	572452	ENSDARG00000028071	431.958881927037	813.058383148053	654.029435516277	565.478591543139	671.296217588027	354.392479835448	-0.255212	0.756802
bmp1b	559877	ENSDARG00000028053	124.528686681668	140.3493637577	180.388649618796	427.509588108215	551.352801189014	327.427834630577	1.55268	0.00143075
bmp2a	30631	ENSDARG00000013409	131.338849234572	252.628854763859	163.989681471633	16.517415904181	60.9389938156278	50.0771982376177	-2.10305	0.00652409
bmp2b	30632	ENSDARG00000115191	268.514980657347	449.117964024639	422.514591085737	27.2051556068864	125.74713009574	220.532276854124	-1.61002	0.0747541
bmp2k	494101	ENSDARG00000115681	943.693953759518	1282.50280675139	1670.7654606404	1232.00490391186	1764.32896380484	1705.51380920809	0.270874	0.69496
bmp3	777717	ENSDARG00000109238	840.568635101261	1413.17290404304	985.867379200052	941.492706538319	902.477479840964	1052.584186033	-0.161483	0.820698
bmp4	30612	ENSDARG00000019995	368.721658221502	791.763996922746	525.731625894353	225.414146457059	175.078696517915	213.791115552906	-1.45683	0.00509058
bmp5	394026	ENSDARG00000101701	303.538673786567	525.58416910642	280.71174887203	104.934171626562	55.1352801189014	71.2637051843021	-2.26237	5.88226e-05
bmp6	503761	ENSDARG00000015686	63.2372237055347	48.3963323302412	73.3130340696712	445.970229412888	460.427953273632	255.201106403244	2.65088	2.49037e-07
bmp7a	30584	ENSDARG00000018260	14.593205470508	10.6471931126531	5.78787111076351	15.5458032039351	2.90185684836323	2.88906912909333	-0.540531	1
bmp7b	557567	ENSDARG00000063230	212.087919504716	489.770883182041	271.065297020758	63.1548255159863	129.616272560224	191.641585563191	-1.3396	0.0735737
bmp8a	561963	ENSDARG00000035677	70.0473862584384	152.932410163562	74.2776792547984	204.038667051648	43.5278527254484	148.305548626791	0.41329	0.749911
bmper	338246	ENSDARG00000101980	317.158998892374	571.076721496846	209.328005172614	96.1896573243484	95.7612759959866	64.5225438830843	-2.09747	0.000605184
bmpr1aa	58145	ENSDARG00000115025	711.17554659609	779.180950516884	774.610083657184	2146.29245484329	1765.29624942096	496.919890204052	0.960792	0.204003
bmpr1ab	447846	ENSDARG00000105045	388.179265515513	587.531474489128	267.206716280249	191.407701948451	437.213098486727	327.427834630577	-0.37855	0.672495
bmpr1ba	30742	ENSDARG00000104100	291.86410941016	413.30467810026	228.620908875159	94.2464319238565	117.04155955065	105.932534733422	-1.55759	0.00252703
bmpr1bb	100149664	ENSDARG00000102742	45.7253771409251	53.2359655632653	28.9393555538176	15.5458032039351	21.2802835546637	26.00162216184	-1.02536	0.360335
bmpr2a	562822	ENSDARG00000011941	323.969161445278	275.859094282375	210.292650357741	1091.12106237619	1174.28473797099	558.553364958044	1.80153	0.000355458
bmpr2b	555655	ENSDARG00000020057	147.877815434481	150.028630223748	58.8433562927624	187.521251147467	296.95668414917	175.270193831662	0.887062	0.25949
bms1	553241	ENSDARG00000054154	292.836989774861	445.246257438219	307.721814055594	249.704463963207	380.143247135583	453.583853267653	0.0510179	0.958523
bmt2	558558	ENSDARG00000109484	218.89808205762	198.424962553989	316.403620721739	227.357371857551	263.101687584933	251.34901423112	0.0157834	0.987193
bnc1	568786	ENSDARG00000100757	197.494714034208	126.798390705232	181.353294803923	68.984501717462	20.3129979385426	90.5241660449243	-1.49151	0.0766695
bnc2	559327	ENSDARG00000069989	798.734779419138	803.379116682004	603.86788588966	874.451430221349	727.39878332305	472.844314128275	-0.0885322	0.91556
bnip1b	795732	ENSDARG00000104280	17.5118465646096	9.67926646604825	3.85858074050901	0	16.4438554740583	7.70418434424888	-0.362365	1
bnip2	394197	ENSDARG00000013397	321.050520351176	455.893450550872	349.201557016065	1330.1377866367	1434.48456870756	829.162840049785	1.6741	0.000162097
bnip3	336116	ENSDARG00000099961	22.3762483881123	17.4226796388868	18.3282585174178	55.3819239140188	20.3129979385426	12.5192995594044	0.601647	0.724136
bnip3la	323563	ENSDARG00000025468	34.0508127645187	15.4868263456772	12.5403874066543	57.3251493145106	25.149426019148	24.0755760757777	0.779477	0.601774
bnip3lb	554650	ENSDARG00000028067	428.067360468235	361.0366391836	262.383490354613	687.901791774128	545.549087492287	849.386323953438	0.986152	0.048728
bnip4	568155	ENSDARG00000117207	241.274330445732	257.468487996883	291.32284590843	216.669632154845	177.013267750157	176.233216874693	-0.471263	0.424682
bnipl	100149386	ENSDARG00000060435	46.6982575056256	121.958757472208	111.898841474761	37.8928953095918	36.7568534126009	63.5595208400532	-1.0214	0.27601
boc	334628	ENSDARG00000074335	961.205800324127	1558.36190103377	633.771886628605	249.704463963207	363.699391661525	369.800848523946	-1.6813	0.00171186
bod1	767743	ENSDARG00000103922	212.087919504716	214.879715546271	386.822719236028	311.887676778948	281.480114291233	341.873180276044	0.20065	0.812679
bod1l1	100332682	ENSDARG00000089505	208.196398045914	231.334468538553	127.333164436797	276.909619570094	249.559688959238	205.123908165626	0.368052	0.630809
boka	445218	ENSDARG00000052129	79.7761899054438	79.3699850215956	134.085680732688	52.4670858132809	59.0044225833857	52.966267366711	-0.834555	0.290615
bokb	394160	ENSDARG00000008807	38.9152145880214	24.1981661651206	26.0454199984358	3.88645080098377	0	3.85209217212444	-3.52621	0.0240911
bola1	445163	ENSDARG00000039915	120.637165222866	119.054977532393	245.984522207449	159.344482840335	329.844395097287	239.792737714746	0.585853	0.493033
bola3	445131	ENSDARG00000098130	76.8575488113422	126.798390705232	218.974457023886	257.477365565175	206.031836233789	135.786249067386	0.503769	0.598138
bop1	777627	ENSDARG00000063627	174.145585281396	326.191279905826	217.045166653632	462.487645317069	308.564111542623	440.101530665217	0.755549	0.215742
bora	555606	ENSDARG00000112916	76.8575488113422	131.638023938256	74.2776792547984	63.1548255159863	53.2007088866592	95.3392812600798	-0.4176	0.683927
borcs5	449650	ENSDARG00000077830	72.96602735254	74.5303517885715	112.863486659889	5.82967620147566	62.87356504787	66.4485899691466	-0.945813	0.498483
borcs7	664759	ENSDARG00000055070	89.5049935524491	36.7812125709833	106.110970363998	102.99094622607	123.812558863498	49.1141751945866	0.247589	0.851829
borcs8	558180	ENSDARG00000071339	20.4304876587112	62.9152320293136	101.287744438361	60.2399874152485	79.3174205219283	28.8906912909333	-0.13252	0.940363
bpgm	436903	ENSDARG00000070826	254.89465555154	146.156923637329	196.787617765959	306.058000577472	293.087541684686	187.789493391066	0.396487	0.608425
bphl	402804	ENSDARG00000102877	67.1287451643368	100.664371246902	57.8787111076351	59.2683747150025	88.990276683139	104.969511690391	0.166287	0.885826
bpifcl	100003132	ENSDARG00000099980	25.2948894822139	45.4925523904268	32.7979362943266	0.971612700245943	51.2661376544171	199.34576990744	1.28027	0.516075
bpnt1	436627	ENSDARG00000043684	95.3422757406523	100.664371246902	181.353294803923	184.606413046729	197.3262656887	174.307170788631	0.559691	0.456662
bptf	324479	ENSDARG00000077361	1875.71334314263	1955.21182614175	1312.88209695819	1287.38682782587	1718.86653984715	2460.52387494448	0.0878656	0.916818
braf	403065	ENSDARG00000017661	896.995696253892	628.184393646531	743.741437733112	243.874787761732	365.633962893767	722.267282273332	-0.768617	0.282661
brap	436739	ENSDARG00000008560	142.040533246278	114.215344299369	129.262454807052	259.420590965667	221.508406091727	166.602986444382	0.748132	0.210069
brat1	678547	ENSDARG00000062585	161.498140540289	288.442140688238	164.95432665676	113.678685928775	157.667555427735	299.500166382675	-0.107184	0.927468
brca2	566758	ENSDARG00000079015	239.328569716331	295.217627214471	212.221940727996	464.430870717561	331.778966329529	289.869935952364	0.540377	0.382226
brcc3	100333845	ENSDARG00000098242	215.006560598818	214.879715546271	249.843102947958	267.193492567634	428.507527941637	206.086931208657	0.407807	0.59061
brd1a	569574	ENSDARG00000116694	346.34540983339	228.430688598739	232.479489615668	136.025778034432	118.008845166771	262.905290747493	-0.642951	0.402257
brd1b	100009661	ENSDARG00000051798	1187.88692529935	1120.85905676839	876.862473280672	1334.99585013793	1451.89570979774	1267.33832462894	0.347866	0.505423
brd2a	30445	ENSDARG00000022280	3103.4883633947	5205.50950544075	1263.6851925167	8286.88472039765	3972.64202540926	8508.30858517985	1.11736	0.140825
brd2b	569354	ENSDARG00000046087	53.5084200585294	53.2359655632653	57.8787111076351	57.3251493145106	81.2519917541704	67.4116130121777	0.32341	0.749478
brd3a	327372	ENSDARG00000006527	1528.39505294454	1373.48791153225	1553.07874805488	1294.1881167276	1448.02656733325	1293.33994679078	-0.142646	0.807866
brd3b	327108	ENSDARG00000100129	3258.17634138209	4156.27702052112	3724.49505977632	3242.27158072071	3768.54476040771	3552.59200574176	-0.0765376	0.904258
brd4	570531	ENSDARG00000078904	861.972003124673	1268.95183369892	854.675634022746	1739.18673344024	1833.00624254944	1364.60365197508	0.72555	0.127065
brd7	406675	ENSDARG00000008380	558.433329338106	656.254266398071	729.271759956203	855.990788916676	883.131767518543	850.34934699647	0.413647	0.40067
brd8	337414	ENSDARG00000025071	740.361957537106	786.924363689722	826.700923654055	684.015340973144	770.926636048498	878.277015244372	-0.0127784	0.986799
brd9	393245	ENSDARG00000017143	276.298023574952	211.975935606457	204.504779246978	204.038667051648	450.755097112422	233.051576413528	0.357939	0.674596
brdt	333996	ENSDARG00000102802	2555.7567180683	4727.35374201796	1881.05811099814	8341.29503161142	3278.13095303433	6668.93457299043	0.996851	0.147016
brf1a	334402	ENSDARG00000017835	90.4778739171497	105.504004479926	86.8180666614527	154.486419339105	84.1538486025337	83.7830047437065	0.189102	0.856715
brf1b	334316	ENSDARG00000115325	204.304876587112	169.387163155844	155.307874805488	104.934171626562	182.816981446883	255.201106403244	0.0376405	0.974016
brf2	445142	ENSDARG00000002060	33.0779323998182	40.6529191574026	41.4797429604719	190.436089248205	98.6631328443498	73.1897512703643	1.65274	0.0298932
bri3	100002236	ENSDARG00000086332	363.857256398	375.555538882672	356.918718497083	1048.37010356537	1595.05398098366	1149.84951337914	1.79076	2.89934e-06
bri3bp	327046	ENSDARG00000010108	44.7524967762246	33.8774326311689	21.2221940727996	24.2903175061486	34.8222821803588	29.8537143339644	-0.166372	0.915434
bricd5	792755	ENSDARG00000056247	35.0236931292192	107.439857773136	36.6565170348356	0	26.1167116352691	87.635096915831	-0.654915	0.788794
brinp1	100334375	ENSDARG00000078302	69.0745058937379	29.0377993981447	37.6211622199628	30.1199937076242	16.4438554740583	16.3713917315289	-1.10891	0.347441
brinp2	561009	ENSDARG00000014302	326.887802539379	187.777769441336	314.474330351484	25.2619302063945	23.2148547869058	172.381124702569	-1.90835	0.066417
brinp3a.1	569746	ENSDARG00000076351	315.213238162973	242.949588297811	411.903494049337	3.88645080098377	39.6587102609641	70.300682141271	-3.09077	0.00147617
brinp3a.2	100001603	ENSDARG00000061051	105.071079387658	50.3321856234509	77.1716148101802	28.1767683071324	18.3784267063005	21.1865069466844	-1.77963	0.0304801
brinp3b	100330048	ENSDARG00000075352	92.4236346465507	89.0492514876439	107.075615549125	0	33.8549965642377	31.7797604200266	-2.13609	0.146804
brip1	794038	ENSDARG00000113993	168.308303093192	202.296669140408	131.191745177306	90.3599811228727	140.256414337556	163.713917315289	-0.347622	0.686109
brk1	415187	ENSDARG00000041974	937.856671571315	1169.25538909863	2095.20934209639	592.683747150025	1624.07254946729	1882.71004912582	-0.0357474	0.977097
brms1	791681	ENSDARG00000051955	208.196398045914	226.494835305529	272.029942205885	248.732851262961	183.784267063005	239.792737714746	-0.0720409	0.933921
brms1la	792017	ENSDARG00000006235	823.056788536652	689.163772382635	820.913052543292	505.23860412789	466.231666970359	810.865402232194	-0.388479	0.542565
brms1lb	562889	ENSDARG00000018047	21.4033680234117	14.5188996990724	34.7272266645811	12.6309651031973	18.3784267063005	6.74116130121777	-0.904376	0.58431
brox	492786	ENSDARG00000013659	35.0236931292192	30.9736526913544	29.9040007389448	201.12382895091	209.900978698274	71.2637051843021	2.33027	0.00133482
brpf1	393991		28.2135305763155	17.4226796388868	8.68180666614527	2.91483810073783	25.149426019148	1.92604608606222	-0.856837	1
brpf3a	100149254	ENSDARG00000110187	98.2609168347539	71.626571848757	74.2776792547984	219.584470255583	101.564989692713	67.4116130121777	0.670237	0.499113
brpf3b	100003354	ENSDARG00000074238	72.96602735254	107.439857773136	48.2322592563626	80.6438541204133	132.518129408587	52.0032443236799	0.213821	0.865648
brsk2a	100334759	ENSDARG00000061421	73.9389077172406	93.888884720668	39.5504525902173	9.71612700245943	25.149426019148	16.3713917315289	-2.01684	0.033898
brsk2b	100149571	ENSDARG00000077791	322.996281080577	179.066429621893	317.368265906866	26.2335429066405	61.9062794317489	186.826470348035	-1.57524	0.0969407
brwd1	798858	ENSDARG00000111353	915.480423183202	731.752544833247	671.393048848568	547.017950238466	530.07251763435	902.352591320149	-0.228149	0.756832
brwd3	553209	ENSDARG00000109876	771.494129207523	1011.48334570204	941.493700684198	721.908236282736	704.183928536144	1097.84626905546	-0.110291	0.88423
bscl2	567403	ENSDARG00000037008	35.9965734939198	15.4868263456772	17.3636133322905	12.6309651031973	8.70557054508969	33.7058065060888	-0.322517	0.871852
bscl2l	541427	ENSDARG00000025912	52.5355396938288	46.4604790370316	138.908906658324	3.88645080098377	24.1821404030269	0.963023043031109	-3.0348	0.0315563
bsdc1	794882	ENSDARG00000116408	569.135013349812	736.592178066271	774.610083657184	1009.50559555554	1110.443887307	759.825180951545	0.469121	0.38851
bsg	337692	ENSDARG00000019881	3190.07471585305	1857.45123483466	3886.5554508777	6399.04124381978	8355.41315205386	5774.28616601453	1.20025	0.0141029
bsk146	405767	ENSDARG00000099069	18.4847269293101	29.0377993981447	9.64645185127252	6.8012889017216	3.86914246448431	0	-2.42238	1
bsna	100004063		429.040240832935	235.206175124972	325.085427387884	132.139327233448	215.704692395	264.831336833555	-0.691268	0.323835
bsnb	101175706	ENSDARG00000079161	1835.82524818991	1199.26111514338	2407.75438207762	243.874787761732	538.77808817944	1150.81253642218	-1.49315	0.044239
bsnd	497323	ENSDARG00000086265	5.8372821882032	15.4868263456772	0	0	1.93457123224215	18.2974378175911	-0.0755087	1
bspry	559377	ENSDARG00000104875	29.186410941016	43.5566990972171	31.8332911091993	82.5870795209052	20.3129979385426	16.3713917315289	0.189498	0.918564
bsx	573364	ENSDARG00000110782	31.1321716704171	14.5188996990724	49.1969044414899	0	7.73828492896861	3.85209217212444	-3.03224	0.0769927
btaf1	565357	ENSDARG00000060089	583.72821882032	560.429528384193	649.206209590641	749.113391889622	631.637507327063	669.301014906621	0.192982	0.747004
btbd10a	560466	ENSDARG00000062674	812.355104524946	782.084730456698	801.620148840747	381.843791196656	780.599492209709	812.791448318256	-0.27862	0.71557
btbd10b	557247	ENSDARG00000115689	796.789018689737	1050.20041156623	955.963378461107	3841.75661677246	3710.50762344045	2403.70551540565	1.82861	3.3968e-06
btbd11a	562893	ENSDARG00000063255	278.243784304353	408.465044867236	470.746850342099	285.654133872307	371.437676590493	371.726894610008	-0.169979	0.829227
btbd11b	100034519	ENSDARG00000063040	71.9931469878395	79.3699850215956	39.5504525902173	87.4451430221349	27.0839972513901	31.7797604200266	-0.384	0.784546
btbd16	565632	ENSDARG00000027710	1.94576072940107	12.5830464058627	7.71716148101802	0	5.80371369672646	0	-1.93856	1
btbd17a	563263	ENSDARG00000099321	30.1592913057166	24.1981661651206	12.5403874066543	46.6374096118053	8.70557054508969	33.7058065060888	0.412704	0.824512
btbd17b	563672	ENSDARG00000112615	35.0236931292192	29.0377993981447	14.4696777769088	20.4038667051648	0.967285616121077	9.63023043031109	-1.34109	0.484958
btbd2a	565970	ENSDARG00000116244	672.260332008069	633.99195352616	1169.14996437423	349.78057208854	374.339533438857	494.030821074959	-1.02297	0.0530388
btbd3a	563691	ENSDARG00000005544	482.548660891465	390.074438581744	481.357947378499	651.952121865028	760.286494271166	491.141751945866	0.491349	0.376965
btbd3b	562593	ENSDARG00000087517	63.2372237055347	12.5830464058627	57.8787111076351	26.2335429066405	48.3642808060538	33.7058065060888	-0.30385	0.855618
btbd6a	100141360	ENSDARG00000076440	706.311144772588	618.505127180483	415.762074789846	189.464476547959	413.0309580837	441.064553708248	-0.73801	0.283987
btbd6b	553533	ENSDARG00000114044	934.938030477213	995.02859270976	867.2160214294	1128.04234498554	1330.01772216648	1095.9202229694	0.345463	0.491289
btbd7	568372	ENSDARG00000003069	405.691112080123	568.172941557032	516.08517404308	580.052782046828	1073.68703389439	754.047042693359	0.692441	0.21575
btbd9	557659	ENSDARG00000068983	130.365968869872	176.162649682078	130.227099992179	177.805124145008	116.074273934529	236.903668585653	0.281319	0.754155
btc	503869	ENSDARG00000110368	52.5355396938288	112.27949100616	85.8534214763255	43.7225715110674	31.9204253319955	28.8906912909333	-1.26196	0.13103
btd	555376	ENSDARG00000099596	53.5084200585294	93.888884720668	66.5605177737804	1.94322540049189	62.87356504787	23.1125530327466	-1.28284	0.416261
btf3	556625	ENSDARG00000116462	6353.88166185919	14860.5778053239	11196.636663772	25578.6759466747	21562.730954571	18261.8059649989	1.01287	0.0552324
btf3l4	393667	ENSDARG00000089681	433.904642656438	786.924363689722	1056.28647771434	884.167557223808	857.015055883274	687.598452724212	0.0930026	0.919886
btg1	114432	ENSDARG00000027249	4629.93765560984	10122.5768701933	3983.98461457555	24156.2349535146	21718.4639387665	14658.1737379765	1.69187	0.00212057
btg2	30079	ENSDARG00000020298	15569.9773566673	23406.4021681979	1293.58919325565	56766.4720118692	74483.8942981713	28277.2456125225	1.98603	0.0510342
btg3	492479	ENSDARG00000115730	777.331411395727	1079.23821096438	777.504019212565	1166.90685299538	1291.32629752164	1010.21117213963	0.396989	0.46649
btg4	378946	ENSDARG00000109355	2.9186410941016	2.90377993981447	0.964645185127252	11.6593524029513	0	7.70418434424888	1.51265	1
btk	568653	ENSDARG00000113249	18.4847269293101	33.8774326311689	75.2423244399257	87.4451430221349	63.8408506639911	157.935779057102	1.27683	0.217051
btr01	563047	ENSDARG00000051965	28.2135305763155	22.262312871911	17.3636133322905	26.2335429066405	8.70557054508969	0	-0.957576	0.700413
btr02	562439	ENSDARG00000052215	39.8880949527219	41.6208458040075	99.358454068107	45.6657969115593	55.1352801189014	26.00162216184	-0.512511	0.692146
btr04	565512	ENSDARG00000060962	156.633738716786	120.022904178998	192.92903702545	98.1328827248403	258.265259504327	167.566009487413	0.158094	0.884942
btr05	794264	ENSDARG00000074813	5.8372821882032	29.0377993981447	3.85858074050901	9.71612700245943	0	0	-1.99585	1
btr06	100151764	ENSDARG00000105558	29.186410941016	10.6471931126531	4.82322592563626	1.94322540049189	16.4438554740583	19.2604608606222	-0.245891	1
btr07	793570	ENSDARG00000105558	19.4576072940107	0.967926646604825	1.9292903702545	2.91483810073783	0	0	-2.94038	1
btr09	100170790	ENSDARG00000115798	35.9965734939198	30.9736526913544	53.0554851819989	30.1199937076242	87.0557054508969	30.8167373769955	0.302131	0.839508
btr12	767681	ENSDARG00000051809	55.4541807879304	81.3058383148053	77.1716148101802	98.1328827248403	75.448278057444	41.4099908503377	0.00698521	0.996816
btr14	569717		16.5389661999091	12.5830464058627	5.78787111076351	0	17.4111410901794	5.77813825818666	-0.589946	1
btr16	767728	ENSDARG00000095113	31.1321716704171	27.1019461049351	30.8686459240721	0	32.8877109481166	14.4453456454666	-0.912499	0.69502
btr18	571162	ENSDARG00000103618	10.7016840117059	9.67926646604825	8.68180666614527	0	32.8877109481166	7.70418434424888	0.482109	1
btr20	678596	ENSDARG00000102992	1.94576072940107	0	8.68180666614527	13.6025778034432	1.93457123224215	0.963023043031109	0.634039	1
btr22	100144555	ENSDARG00000103618	23.3491287528128	29.0377993981447	23.1514844430541	0	25.149426019148	27.9276682479022	-0.508943	0.843563
btr23	100334710	ENSDARG00000099509	18.4847269293101	19.3585329320965	16.3989681471633	21.3754794054108	16.4438554740583	22.1495299897155	0.144831	0.939243
btr24	100000030	ENSDARG00000102143	1.94576072940107	0.967926646604825	0	0	0	6.74116130121777	1.21093	1
btr25	571141	ENSDARG00000102018	33.0779323998182	31.9415793379592	34.7272266645811	16.517415904181	16.4438554740583	38.5209217212444	-0.48049	0.743647
btr26	100149795	ENSDARG00000105241	17.5118465646096	17.4226796388868	17.3636133322905	0	5.80371369672646	28.8906912909333	-0.59172	1
btr29	797384	ENSDARG00000099138	16.5389661999091	14.5188996990724	3.85858074050901	20.4038667051648	27.0839972513901	3.85209217212444	0.556239	1
btr30	393394	ENSDARG00000102591	32.1050520351176	0	0	0	0	0	-5.91026	1
btr31	555877	ENSDARG00000096304	8.7559232823048	7.7434131728386	3.85858074050901	0	16.4438554740583	41.4099908503377	1.50711	1
btr32	678629	ENSDARG00000053940	2.9186410941016	0.967926646604825	1.9292903702545	0	1.93457123224215	6.74116130121777	0.577616	1
btr33	799840	ENSDARG00000008164	35.9965734939198	20.3264595787013	25.0807748133086	25.2619302063945	15.4765698579372	7.70418434424888	-0.749013	0.637224
bub1	100307076	ENSDARG00000077029	256.840416280941	321.351646672802	195.822972580832	112.707073228529	216.671978011121	343.799226362106	-0.201311	0.850784
bub1ba	567931	ENSDARG00000078825	116.745643764064	179.066429621893	123.474583696288	276.909619570094	190.555266375852	257.127152489306	0.789214	0.19248
bub1bb	567006	ENSDARG00000074927	122.582925952267	231.334468538553	206.434069617232	424.594750007477	207.966407466031	216.680184682	0.599777	0.454069
bub3	403012	ENSDARG00000075883	595.402783196727	1087.94955078382	694.544533291622	1029.9094622607	967.285616121077	1429.12619585817	0.526976	0.393105
buc	334375	ENSDARG00000096095	30.1592913057166	12.5830464058627	16.3989681471633	18.4606413046729	21.2802835546637	14.4453456454666	-0.126135	0.9512
buc2l	100537720	ENSDARG00000096628	34.0508127645187	19.3585329320965	8.68180666614527	85.501917621643	9.67285616121077	9.63023043031109	0.755233	0.718863
bud23	572367	ENSDARG00000063596	114.799883034663	290.377993981447	237.302715541304	342.007670486572	325.007967016682	310.093419856017	0.604821	0.408265
bud31	445383	ENSDARG00000017084	505.897789644278	746.27144453232	1182.65499696601	1338.88230093891	1604.72683714487	876.35096915831	0.649721	0.344628
bves	415107	ENSDARG00000058548	28.2135305763155	30.9736526913544	55.9494207373806	3.88645080098377	23.2148547869058	7.70418434424888	-1.72592	0.214736
bxdc2	402823	ENSDARG00000098935	316.186118527674	801.443263388795	653.06479033115	642.235994862568	857.015055883274	957.244904772923	0.472279	0.532849
bysl	394081	ENSDARG00000001057	461.145292868053	726.912911600223	726.377824400821	1006.5907574548	827.996487399642	1242.29972551013	0.684543	0.196869
bzw1a	325226	ENSDARG00000010481	1486.56119726242	1860.35501477447	2442.4816087422	3019.77227236439	3829.48375422334	2348.81320195288	0.667911	0.204938
bzw1b	406812	ENSDARG00000099148	2640.39730979725	4836.72945308431	1186.51357770652	8481.20726044684	6382.15049516686	6532.18530088002	1.30427	0.0489058
bzw2	393892	ENSDARG00000035918	376.504701139107	450.085890671243	360.777299237592	35.9496699090999	138.321843105314	111.710672991609	-2.05368	0.00189777
c10h21orf59	792532	ENSDARG00000111366	156.633738716786	324.255426612616	227.656263690032	416.82184840551	309.531397158744	288.906912909333	0.518875	0.469479
c13h10orf11	553730	ENSDARG00000057166	109.93548121116	136.47765717128	162.060391101378	201.12382895091	241.821404030269	150.231594712853	0.538155	0.443826
c13h10orf71	101884346		145.93205470508	84.2096182546197	58.8433562927624	46.6374096118053	39.6587102609641	13.4823226024355	-1.53432	0.112246
c13h7orf72	101884205	ENSDARG00000109818	12.6474447411069	2.90377993981447	8.68180666614527	40.8077334103296	0.967285616121077	3.85209217212444	0.912792	1
c15h3orf80	101887089		88.5321131877486	105.504004479926	68.4898081440349	25.2619302063945	90.9248479153812	47.1881291085244	-0.684202	0.535151
c16h2orf66	103908919	ENSDARG00000116758	8.7559232823048	20.3264595787013	53.0554851819989	0	1.93457123224215	4.81511521515555	-3.6039	1
c17h14orf159	560387	ENSDARG00000005179	368.721658221502	362.004565830204	652.100145146023	393.503143599607	328.877109481166	456.472922396746	-0.23025	0.772633
c17h15orf52	796966		20.4304876587112	14.5188996990724	2.89393555538176	36.9212826093458	4.83642808060538	0.963023043031109	0.174789	1
c18h15orf65	103909108		12.6474447411069	0.967926646604825	19.292903702545	0	8.70557054508969	1.92604608606222	-1.62997	1
c18h3orf33	565816	ENSDARG00000040582	65.1829844349358	109.375711066345	91.641292587089	79.6722414201673	26.1167116352691	40.4469678073066	-0.864365	0.390165
c19h1orf109	286778	ENSDARG00000012113	105.071079387658	162.611676629611	250.807748133086	130.196101832956	190.555266375852	179.122286003786	-0.0527897	0.963326
c19h1orf216	101883800		143.986293975679	213.911788899666	259.489554799231	1619.67837130999	1219.74716192868	1223.03926464951	2.71805	1.59944e-10
c1d	474329	ENSDARG00000021112	155.660858352085	321.351646672802	451.453946639554	202.095441651156	238.919547181906	263.868313790524	-0.397489	0.654164
c1galt1a	557675	ENSDARG00000112143	60.3185826114331	30.9736526913544	20.2575488876723	11.6593524029513	31.9204253319955	20.2234839036533	-0.805771	0.582594
c1galt1b	337131	ENSDARG00000113870	85.613472093647	119.054977532393	67.5251629589077	262.335429066405	97.6958472282287	145.416479497698	0.892901	0.280559
c1galt1c1	324052	ENSDARG00000036335	365.803017127401	449.117964024639	474.605431082608	331.319930783867	559.091086117982	494.030821074959	0.102468	0.900271
c1qa	553548	ENSDARG00000109639	16.5389661999091	31.9415793379592	11.575742221527	0	1.93457123224215	34.6688295491199	-0.714017	0.817395
c1qb	445088	ENSDARG00000044612	11.6745643764064	15.4868263456772	35.6918718497083	0	0	25.0385991188088	-1.32751	1
c1qbp	334619	ENSDARG00000039887	732.578914619502	1643.53944593499	1418.99306732219	1419.52615505932	1373.54557489193	2008.86606776289	0.339471	0.654375
c1qc	449803	ENSDARG00000109447	24.3220091175133	55.171818856475	56.9140659225079	12.6309651031973	17.4111410901794	16.3713917315289	-1.55532	0.145341
c1ql1	556064	ENSDARG00000028521	39.8880949527219	9.67926646604825	12.5403874066543	2.91483810073783	2.90185684836323	6.74116130121777	-2.30559	1
c1ql1b	571639		78.8033095407432	81.3058383148053	26.0454199984358	78.7006287199214	39.6587102609641	183.937401218942	0.699591	0.595356
c1ql2	100005110	ENSDARG00000015592	40.8609753174224	27.1019461049351	20.2575488876723	45.6657969115593	23.2148547869058	128.082064723138	1.15894	0.36234
c1ql3a	100151368	ENSDARG00000010350	39.8880949527219	26.1340194583303	57.8787111076351	68.012889017216	60.9389938156278	45.2620830224621	0.491557	0.67045
c1ql3b	403002	ENSDARG00000036483	45.7253771409251	45.4925523904268	49.1969044414899	37.8928953095918	4.83642808060538	3.85209217212444	-1.59229	0.300504
c1ql4a	559288	ENSDARG00000115758	123.555806316968	48.3963323302412	205.469424432105	29.1483810073783	67.7099931284754	27.9276682479022	-1.59675	0.100405
c1ql4b	567540	ENSDARG00000113446	44.7524967762246	41.6208458040075	62.7019370332714	2.91483810073783	23.2148547869058	10.5932534733422	-2.02112	0.101904
c1ql4l	100007371	ENSDARG00000110017	2.9186410941016	10.6471931126531	12.5403874066543	34.978057208854	0	10.5932534733422	0.803437	1
c1qtnf1	550573	ENSDARG00000088878	58.372821882032	81.3058383148053	67.5251629589077	31.0916064078702	37.724139028722	20.2234839036533	-1.21866	0.153238
c1qtnf12	790933	ENSDARG00000070681	242.247210810433	502.353929587904	452.418591824681	148.656743137629	107.36870338944	176.233216874693	-1.46948	0.00967511
c1qtnf2	572041	ENSDARG00000059944	29.186410941016	55.171818856475	93.5705829573435	0	0.967285616121077	3.85209217212444	-5.20372	0.000127886
c1qtnf4	550397	ENSDARG00000024299	108.96260084646	33.8774326311689	148.555358509597	0	19.3457123224215	6.74116130121777	-3.48135	0.0138365
c1qtnf5	555815	ENSDARG00000056134	62.2643433408342	115.183270945974	87.78271184658	20.4038667051648	8.70557054508969	22.1495299897155	-2.37136	0.00433794
c1qtnf6a	565113	ENSDARG00000055175	64.2101040702352	128.734243998442	54.9847755522534	186.549638447221	126.714415711861	31.7797604200266	0.476783	0.728943
c1qtnf6b	570839	ENSDARG00000006544	15.5660858352085	12.5830464058627	8.68180666614527	18.4606413046729	1.93457123224215	19.2604608606222	0.106716	1
c1qtnf7	564609	ENSDARG00000074949	10.7016840117059	4.83963323302412	5.78787111076351	1.94322540049189	3.86914246448431	15.4083686884978	-0.00679457	1
c1qtnf9	799425	ENSDARG00000112904	39.8880949527219	10.6471931126531	21.2221940727996	0	20.3129979385426	0.963023043031109	-1.75382	1
c1r	560927	ENSDARG00000100248	9.72880364700534	0	11.575742221527	15.5458032039351	2.90185684836323	1.92604608606222	-0.064747	1
c1s	793529	ENSDARG00000100599	29.186410941016	33.8774326311689	22.1868392579268	23.3187048059026	54.1679945027803	43.3360369363999	0.503228	0.707368
c20h2orf81	100536360		46.6982575056256	35.8132859243785	125.403874066543	31.0916064078702	37.724139028722	39.4839447642755	-0.941017	0.40296
c23h1orf87	103909720		16.5389661999091	5.80755987962895	13.5050325917815	1.94322540049189	0	0	-4.20845	1
c23h20orf24	334006	ENSDARG00000074790	584.701099185021	700.778892141893	527.660916264607	389.616692798623	528.137946402108	940.873513041394	0.0357729	0.972611
c24h7orf50	567594	ENSDARG00000045254	93.3965150112513	280.698727515399	200.646198506468	225.414146457059	291.152970452444	183.937401218942	0.285436	0.779247
c25h12orf75	100535414	ENSDARG00000100152	69.0745058937379	66.7869386157329	201.610843691596	32.0632191081161	5.80371369672646	40.4469678073066	-2.10742	0.0559823
c2cd2	100332559	ENSDARG00000105000	547.731645326401	513.969049347162	480.393302193372	502.323766027153	690.641929910449	600.926378851412	0.218218	0.727916
c2cd2l	566488	ENSDARG00000061066	434.877523021139	249.725074824045	353.060137756574	232.21543535878	151.863841731009	349.577364620293	-0.500121	0.528946
c2cd3	797081	ENSDARG00000074137	185.820149657802	202.296669140408	183.282585174178	178.776736845254	104.466846541076	148.305548626791	-0.404999	0.584435
c2cd4a	569005	ENSDARG00000061416	48.6440182350267	104.536077833321	8.68180666614527	196.265765449681	261.167116352691	101.117419518266	1.78696	0.103702
c2cd5	393585	ENSDARG00000094590	562.324850796909	672.709019390353	855.640279207873	653.89534726552	757.384637422803	850.34934699647	0.113389	0.875367
c2h1orf27	393588	ENSDARG00000042671	72.96602735254	86.1454715478294	109.969551104507	68.012889017216	139.289128721435	120.377880378889	0.284249	0.781285
c3a.1	321046	ENSDARG00000012694	26.2677698469144	38.717065864193	192.92903702545	14.5741905036891	47.3969951899328	129.045087766169	-0.433165	0.823549
c3a.2	30491	ENSDARG00000087359	31.1321716704171	60.0114520894991	48.2322592563626	16.517415904181	11.6074273934529	58.7444056248977	-0.681885	0.658795
c3a.3	565074	ENSDARG00000052207	12.6474447411069	14.5188996990724	50.1615496266171	16.517415904181	0	20.2234839036533	-1.07365	0.661737
c3a.4	100331428	ENSDARG00000093198	35.0236931292192	17.4226796388868	13.5050325917815	17.489028604427	12.574713009574	33.7058065060888	-0.0482282	0.982173
c3a.6	494039	ENSDARG00000043719	28.2135305763155	41.6208458040075	36.6565170348356	41.7793461105756	43.5278527254484	25.0385991188088	0.0511668	0.974523
c3ar1	794255	ENSDARG00000031749	25.2948894822139	12.5830464058627	7.71716148101802	0	4.83642808060538	0.963023043031109	-2.97448	1
c3b.1	563665	ENSDARG00000093068	75.8846684466416	86.1454715478294	109.969551104507	28.1767683071324	69.6445643607175	111.710672991609	-0.376334	0.761026
c3b.2	566347	ENSDARG00000115568	34.0508127645187	12.5830464058627	38.5858074050901	34.006444508608	9.67285616121077	10.5932534733422	-0.651209	0.718378
c4	566261	ENSDARG00000015065	523.409636208887	337.806399665084	605.797176259915	624.746966258141	1005.97704076592	961.096996945047	0.82109	0.139811
c5	565774	ENSDARG00000021004	29.186410941016	27.1019461049351	43.4090333307264	14.5741905036891	20.3129979385426	52.0032443236799	-0.198202	0.911274
c5ar1	100000959	ENSDARG00000040319	21.4033680234117	33.8774326311689	26.0454199984358	6.8012889017216	18.3784267063005	14.4453456454666	-1.03717	0.47409
c5h9orf84	100002712		12.6474447411069	0.967926646604825	5.78787111076351	32.0632191081161	2.90185684836323	7.70418434424888	1.13698	1
c6	393611	ENSDARG00000115290	344.399649103989	468.476496956735	372.353041459119	317.717352980423	326.942538248924	98.2283503891732	-0.673991	0.4217
c6ast3	541399	ENSDARG00000024503	5.8372821882032	2.90377993981447	9.64645185127252	10.6877397027054	4.83642808060538	1.92604608606222	-0.0759559	1
c6ast4	574001	ENSDARG00000052578	4.86440182350267	7.7434131728386	84.8887762911982	0	17.4111410901794	45.2620830224621	-0.637448	0.834798
c6h1orf226	108179105		134.257490328674	84.2096182546197	109.00490591938	664.583086968225	530.07251763435	301.426212468737	2.19176	3.94563e-05
c7a	562475	ENSDARG00000042172	128.42020814047	143.253143697514	126.36851925167	63.1548255159863	90.9248479153812	74.1527743133954	-0.802387	0.219491
c7b	570832	ENSDARG00000114734	225.708244610524	140.3493637577	203.54013406185	17.489028604427	104.466846541076	49.1141751945866	-1.73528	0.0494881
c8a	445102	ENSDARG00000039516	27.240650211615	19.3585329320965	45.3383237009809	0	19.3457123224215	86.6720738727998	0.205682	0.946407
c8b	793127	ENSDARG00000039517	36.9694538586203	20.3264595787013	22.1868392579268	0	6.77099931284754	23.1125530327466	-1.41083	0.527567
c8g	393837	ENSDARG00000032098	14.593205470508	0.967926646604825	23.1514844430541	2.91483810073783	11.6074273934529	13.4823226024355	-0.466999	1
c8h22orf15	101886360		16.5389661999091	19.3585329320965	5.78787111076351	0	3.86914246448431	0	-3.42938	1
c9	554141	ENSDARG00000016319	35.9965734939198	33.8774326311689	170.742197767524	0	45.4624239576906	142.527410368604	-0.35604	0.895716
c9hxorf21	796876		35.0236931292192	12.5830464058627	22.1868392579268	27.2051556068864	1.93457123224215	16.3713917315289	-0.616922	0.77615
ca10a	641327	ENSDARG00000052644	263.650578833845	162.611676629611	412.868139234464	50.523860412789	31.9204253319955	71.2637051843021	-2.44864	0.000193761
ca10b	568543	ENSDARG00000009568	195.548953304807	197.457035907384	220.903747394141	73.8425652186917	103.499560924955	104.00648864736	-1.12562	0.0353828
ca12	100537787	ENSDARG00000045644	60.3185826114331	58.0755987962895	114.792777030143	87.4451430221349	76.415563673565	13.4823226024355	-0.395095	0.797222
ca14	567897	ENSDARG00000061697	123.555806316968	130.670097291651	27.0100651835631	0	10.6401417773318	95.3392812600798	-1.40782	0.51584
ca15a	553469	ENSDARG00000015654	27.240650211615	38.717065864193	193.893682210578	41.7793461105756	15.4765698579372	35.631852592151	-1.48423	0.258452
ca15b	791844	ENSDARG00000040510	12.6474447411069	2.90377993981447	8.68180666614527	26.2335429066405	2.90185684836323	4.81511521515555	0.486302	1
ca15c	768190	ENSDARG00000002259	5.8372821882032	4.83963323302412	28.9393555538176	18.4606413046729	16.4438554740583	13.4823226024355	0.288184	1
ca16b	569183	ENSDARG00000110045	401.799590621321	267.147754462932	405.150977753446	7825.36868778083	8151.31588705231	5208.99163975527	4.30189	1.01188e-24
ca16c	497461	ENSDARG00000051814	1316.30713343982	1357.03315853996	1377.51332436172	131.167714533202	121.877987631256	295.648074210551	-2.88408	1.45e-08
ca2	387526	ENSDARG00000014488	410.555513903625	696.907185555474	1298.41241918128	1095.00751317718	1283.58801259267	1541.79989189281	0.704424	0.33533
ca4a	555196	ENSDARG00000043589	152.742217257984	92.9209580740632	156.272519990615	4680.25837708471	3109.82325582926	1800.85309046817	4.57663	2.28785e-17
ca4b	553246	ENSDARG00000042293	10.7016840117059	4.83963323302412	39.5504525902173	18.4606413046729	5.80371369672646	0.963023043031109	-1.12737	1
ca4c	407683	ENSDARG00000044512	11.6745643764064	4.83963323302412	22.1868392579268	13.6025778034432	9.67285616121077	2.88906912909333	-0.565149	1
ca5a	569989	ENSDARG00000111390	825.975429630753	1290.24621992423	1104.5187369707	839.473373012495	735.137068252018	1169.10997423977	-0.231255	0.743944
ca6	100006448	ENSDARG00000110050	306.457314880668	597.210740955177	886.508925131945	55.3819239140188	294.054827300807	282.165751608115	-1.50298	0.0877523
ca7	564201	ENSDARG00000113549	98.2609168347539	50.3321856234509	12.5403874066543	3.88645080098377	23.2148547869058	11.5562765163733	-2.0592	0.152009
ca8	550233	ENSDARG00000039098	224.735364245823	207.136302373432	337.625814794538	124.366425631481	123.812558863498	226.310415112311	-0.697504	0.331346
ca9	566612	ENSDARG00000102300	30.1592913057166	57.1076721496846	20.2575488876723	13.6025778034432	6.77099931284754	53.9292904097421	-0.532949	0.782283
caap1	100329847	ENSDARG00000079652	139.121892152176	181.002282915102	205.469424432105	167.117384442302	277.610971826749	226.310415112311	0.352434	0.646931
cab39	415235	ENSDARG00000043451	40.8609753174224	24.1981661651206	37.6211622199628	30.1199937076242	18.3784267063005	19.2604608606222	-0.59977	0.655479
cab39l	492361	ENSDARG00000036658	749.117880819411	596.242814308572	880.721054021181	678.185664771668	800.912490148251	1012.1372182257	0.162363	0.822311
cab39l1	406822	ENSDARG00000112995	110.908361575861	115.183270945974	82.9594859209437	165.17415904181	223.442977323969	130.971133852231	0.749541	0.268673
cabin1	571383	ENSDARG00000079326	257.813296645642	285.538360748423	218.009811838759	441.112165911658	266.970830049417	304.315281597831	0.41111	0.541738
cables1	100126070	ENSDARG00000099395	197.494714034208	171.323016449054	280.71174887203	693.731467975603	504.923091615202	242.68180684384	1.1499	0.0829528
cables2a	100148748	ENSDARG00000076964	380.396222597909	254.564708057069	303.863233315085	251.647689363699	200.228122537063	404.469678073066	-0.132617	0.886884
cables2b	564291	ENSDARG00000017154	118.691404493465	92.9209580740632	88.7473570317072	121.451587530743	91.8921335315023	212.828092509875	0.504832	0.575597
cabp1a	449789	ENSDARG00000019990	66.1558647996363	110.34363771295	167.848262212142	47.6090223120512	61.9062794317489	44.299059979431	-1.16276	0.145773
cabp1b	436687	ENSDARG00000033411	14.593205470508	4.83963323302412	9.64645185127252	8.74451430221349	3.86914246448431	22.1495299897155	0.257901	1
cabp2a	572226	ENSDARG00000052016	695.609460760882	473.316130189759	161.095745916251	16.517415904181	206.031836233789	243.644829886871	-1.51239	0.204858
cabp2b	559616	ENSDARG00000052277	62.2643433408342	107.439857773136	68.4898081440349	14.5741905036891	60.9389938156278	44.299059979431	-0.991255	0.366986
cabp4	797905	ENSDARG00000008866	29.186410941016	22.262312871911	11.575742221527	0	9.67285616121077	0	-2.70384	1
cabp5a	393671	ENSDARG00000002576	263.650578833845	135.509730524675	38.5858074050901	9.71612700245943	62.87356504787	79.9309125715821	-1.52093	0.235229
cabp5b	553766	ENSDARG00000028485	275.325143210251	150.028630223748	72.3483888845439	0	66.7427075123543	68.3746360552088	-1.88096	0.251645
cabp7b	556082	ENSDARG00000060846	116.745643764064	119.054977532393	502.580141451299	30.1199937076242	45.4624239576906	38.5209217212444	-2.69402	0.00143075
cabz01076234.2	100332077	ENSDARG00000067794	29.186410941016	22.262312871911	9.64645185127252	13.6025778034432	31.9204253319955	2.88906912909333	-0.335678	0.887252
cabz01093075.1	100329767	ENSDARG00000086616	24.3220091175133	7.7434131728386	7.71716148101802	0	0.967285616121077	0.963023043031109	-4.36339	1
cachd1	794807	ENSDARG00000113216	1219.99197733447	1885.5211075862	1365.93758214019	494.550864425185	526.203375169866	575.887779732603	-1.4857	0.000157856
cacna1aa	562059	ENSDARG00000037905	2102.39446811785	879.845321763785	2597.78948354769	334.234768884604	444.951383415695	1188.37043510039	-1.50385	0.0500812
cacna1ab	569528	ENSDARG00000006923	348.291170562791	245.853368237625	754.352534769511	185.578025746975	118.976130782892	140.601364282542	-1.59901	0.015194
cacna1ba	555941	ENSDARG00000021735	492.27746453847	256.500561350278	595.186079223515	119.508362130251	82.2192773702915	102.080442561298	-2.14529	8.28531e-05
cacna1bb	562796	ENSDARG00000116562	168.308303093192	60.0114520894991	101.287744438361	150.599968538121	62.87356504787	247.496922058995	0.484001	0.688414
cacna1c	170581	ENSDARG00000008398	998.175254182748	938.88884720668	1227.99332066699	263.307041766651	177.980553366278	230.162507284435	-2.2369	1.04874e-08
cacna1da	403310	ENSDARG00000102773	116.745643764064	67.7548652623377	84.8887762911982	59.2683747150025	42.5605671093274	55.8553364958043	-0.772619	0.35551
cacna1db	403311		127.44732777577	57.1076721496846	43.4090333307264	11.6593524029513	42.5605671093274	26.00162216184	-1.50656	0.166974
cacna1e	564274	ENSDARG00000062346	163.44390126969	64.8510853225232	107.075615549125	34.978057208854	39.6587102609641	35.631852592151	-1.60468	0.0329588
cacna1eb	567702	ENSDARG00000095614	72.96602735254	22.262312871911	23.1514844430541	0	36.7568534126009	10.5932534733422	-1.32183	0.552295
cacna1fa	793708		700.473862584384	210.040082313247	79.1009051804347	1.94322540049189	92.8594191476234	87.635096915831	-2.43937	0.0844759
cacna1fb	559964	ENSDARG00000112226	364.8301367627	179.066429621893	68.4898081440349	48.5806350122972	65.7754218962332	186.826470348035	-1.02368	0.377962
cacna1g	563904	ENSDARG00000089913	545.785884596999	584.627694549314	593.25678885326	157.401257439843	85.1211342186547	177.196239917724	-2.03797	2.1046e-05
cacna1ha	560875	ENSDARG00000060496	257.813296645642	167.451309862635	172.671488137778	74.8141779189376	151.863841731009	210.902046423813	-0.450346	0.631176
cacna1hb	100007317	ENSDARG00000099708	70.0473862584384	43.5566990972171	20.2575488876723	59.2683747150025	36.7568534126009	21.1865069466844	-0.191627	0.909931
cacna1i	566351	ENSDARG00000070522	123.555806316968	71.626571848757	72.3483888845439	74.8141779189376	27.0839972513901	34.6688295491199	-0.970187	0.326226
cacna1sa	570683	ENSDARG00000029457	32.1050520351176	29.0377993981447	20.2575488876723	35.9496699090999	19.3457123224215	1.92604608606222	-0.508691	0.812679
cacna1sb	405791	ENSDARG00000042552	37.9423342233208	30.9736526913544	21.2221940727996	7.77290160196755	3.86914246448431	0.963023043031109	-2.83899	0.0490565
cacna2d1	101882457	ENSDARG00000073752	80.7490702701443	57.1076721496846	60.7726466630169	4.85806350122972	20.3129979385426	14.4453456454666	-2.3256	0.0164844
cacna2d1a	561434	ENSDARG00000014804	247.111612633936	198.424962553989	145.661422954215	553.819239140188	344.353679339103	278.313659435991	0.992782	0.103575
cacna2d2a	541376	ENSDARG00000103390	469.901216150358	331.03091313885	700.332404402385	33.0348318083621	52.2334232705381	126.156018637075	-2.8278	4.86229e-05
cacna2d2b	568759	ENSDARG00000078169	472.81985724446	254.564708057069	553.706336263043	111.735460528283	73.5137068252018	145.416479497698	-1.95389	0.000769606
cacna2d3	100148645	ENSDARG00000078760	220.843842787021	64.8510853225232	344.378331090429	28.1767683071324	26.1167116352691	28.8906912909333	-2.92115	0.000297125
cacna2d3a	100535196	ENSDARG00000106018	21.4033680234117	9.67926646604825	3.85858074050901	12.6309651031973	17.4111410901794	26.00162216184	0.682072	1
cacna2d4a	568225	ENSDARG00000026855	113.827002669962	58.0755987962895	28.9393555538176	26.2335429066405	15.4765698579372	30.8167373769955	-1.46933	0.174244
cacna2d4b	100150428	ENSDARG00000023886	498.114746726673	112.27949100616	52.0908399968716	27.2051556068864	50.298852038296	17.33441477456	-2.80434	0.00889775
cacnb1	436925	ENSDARG00000002167	942.721073394817	532.359655632653	1146.9631251163	288.568971973045	192.489837608094	274.461567263866	-1.79515	0.000370963
cacnb2a	795492	ENSDARG00000099045	36.9694538586203	74.5303517885715	47.2676140712354	292.455422774029	207.966407466031	68.3746360552088	1.84091	0.0275405
cacnb2b	558806	ENSDARG00000055565	28.2135305763155	14.5188996990724	13.5050325917815	10.6877397027054	5.80371369672646	1.92604608606222	-1.61086	1
cacnb3a	565158	ENSDARG00000113797	76.8575488113422	57.1076721496846	52.0908399968716	23.3187048059026	18.3784267063005	13.4823226024355	-1.75368	0.0410512
cacnb3b	559015	ENSDARG00000076030	87.559232823048	86.1454715478294	71.3837436994167	70.9277271179539	50.298852038296	183.937401218942	0.316385	0.803156
cacnb4a	562422	ENSDARG00000009738	35.9965734939198	24.1981661651206	13.5050325917815	35.9496699090999	18.3784267063005	10.5932534733422	-0.183034	0.927158
cacnb4b	678560	ENSDARG00000062174	1510.88320637993	1047.29663162642	1990.06301691752	78.7006287199214	226.344834172332	855.164462211625	-1.97089	0.0351671
cacng1a	322013	ENSDARG00000008772	59.3457022467326	40.6529191574026	55.9494207373806	0	8.70557054508969	5.77813825818666	-3.4279	0.00969065
cacng1b	571193	ENSDARG00000052360	7.78304291760427	7.7434131728386	6.75251629589077	8.74451430221349	5.80371369672646	6.74116130121777	-0.0655925	1
cacng2a	393614	ENSDARG00000032565	268.514980657347	126.798390705232	402.257042198064	129.22448913271	81.2519917541704	178.159262960755	-1.03718	0.20003
cacng2b	569855	ENSDARG00000102376	192.630312210706	95.8247380138776	353.060137756574	34.978057208854	68.6772787445964	140.601364282542	-1.393	0.145134
cacng3a	567438	ENSDARG00000058460	14.593205470508	9.67926646604825	3.85858074050901	14.5741905036891	48.3642808060538	6.74116130121777	1.30881	0.497904
cacng3b	564883	ENSDARG00000076401	335.643725821684	207.136302373432	547.918465152279	171.975447943532	101.564989692713	636.558231443563	-0.261131	0.855091
cacng4a	797554	ENSDARG00000115540	7.78304291760427	10.6471931126531	4.82322592563626	0	8.70557054508969	0	-1.41739	1
cacng4b	794222	ENSDARG00000074669	33.0779323998182	15.4868263456772	13.5050325917815	60.2399874152485	15.4765698579372	3.85209217212444	0.358222	0.876887
cacng5a	797409	ENSDARG00000003326	43.779616411524	22.262312871911	22.1868392579268	0.971612700245943	13.5419986256951	52.0032443236799	-0.407237	0.867516
cacng5b	100331116	ENSDARG00000039240	12.6474447411069	5.80755987962895	7.71716148101802	10.6877397027054	8.70557054508969	2.88906912909333	-0.232261	1
cacng6a	100034580	ENSDARG00000036457	44.7524967762246	27.1019461049351	43.4090333307264	36.9212826093458	37.724139028722	6.74116130121777	-0.502231	0.761976
cacng6b	100003220	ENSDARG00000046079	14.593205470508	7.7434131728386	11.575742221527	0	28.0512828675112	8.66720738727999	0.114821	1
cacng7a	100034540	ENSDARG00000063006	49.6168985997272	27.1019461049351	30.8686459240721	27.2051556068864	6.77099931284754	1.92604608606222	-1.58379	0.338963
cacng7b	100003278	ENSDARG00000070624	55.4541807879304	36.7812125709833	76.2069696250529	32.0632191081161	3.86914246448431	34.6688295491199	-1.25449	0.367715
cacng8a	550428	ENSDARG00000020450	154.687977987385	24.1981661651206	202.575488876723	15.5458032039351	13.5419986256951	30.8167373769955	-2.67064	0.0120439
cacng8b	100003329	ENSDARG00000070626	153.715097622684	92.9209580740632	264.312780724867	99.1044954250862	40.6259958770852	149.268571669822	-0.822096	0.423711
cactin	100126813	ENSDARG00000059866	263.650578833845	230.366541891948	138.908906658324	194.322540049189	194.424408840336	272.535521177804	0.0632972	0.951196
cacul1	100538081	ENSDARG00000021885	58.372821882032	164.54752992282	96.4645185127252	274.966394169602	134.45270064083	187.789493391066	0.902876	0.277901
cacybp	405823	ENSDARG00000014731	276.298023574952	865.326422064713	660.781951812168	1494.34033297826	677.099931284754	1199.92671161676	0.903394	0.226966
cad	266992	ENSDARG00000041895	936.883791206614	1938.75707314946	1227.99332066699	828.78563330979	962.449188040471	2026.20048253745	-0.10429	0.92072
cadm1a	569931	ENSDARG00000031075	1659.73390217911	1169.25538909863	1758.54817248698	66.0696636167241	266.970830049417	868.646784814061	-1.93262	0.0418203
cadm1b	562183	ENSDARG00000042677	8.7559232823048	4.83963323302412	0	0	3.86914246448431	3.85209217212444	-0.815671	1
cadm2a	793954	ENSDARG00000110607	1692.81183457893	1337.67462560787	2798.43568205416	282.739295771569	374.339533438857	899.463522191056	-1.90486	0.00319748
cadm2b	571698	ENSDARG00000062633	197.494714034208	69.6907185555474	201.610843691596	17.489028604427	20.3129979385426	38.5209217212444	-2.61854	0.000982847
cadm3	692273	ENSDARG00000057013	1567.31026753256	2192.35385455993	1166.25602881885	238.045111560256	640.343077872153	1565.87546796858	-1.01097	0.271554
cadm4	492787	ENSDARG00000040291	1505.04592419173	1163.447829219	2066.26998654257	166.145771742056	302.760397845897	528.699650624079	-2.24671	0.000118074
cadps2	407617	ENSDARG00000117190	351.209811656893	249.725074824045	272.029942205885	165.17415904181	214.737406778879	249.422968145057	-0.472038	0.466587
cadpsa	100333933	ENSDARG00000043661	114.799883034663	67.7548652623377	43.4090333307264	57.3251493145106	31.9204253319955	61.633474753991	-0.582592	0.608425
cadpsb	100001129	ENSDARG00000070567	1209.29029332276	556.557821797774	1810.63901248385	210.83995595337	155.732984195493	546.99708844167	-1.96893	0.00854673
cahz	30331	ENSDARG00000011166	860.999122759973	482.027470009203	712.87279180904	420.708299206493	827.996487399642	670.264037949652	-0.0994202	0.914302
calb1	100001650	ENSDARG00000031598	90.4778739171497	60.0114520894991	130.227099992179	7.77290160196755	8.70557054508969	18.2974378175911	-3.01253	0.000381301
calb2a	393691	ENSDARG00000110220	1002.06677564155	396.849925107978	1125.7409310435	43.7225715110674	252.461545807601	354.392479835448	-1.95625	0.0297277
calb2b	393684	ENSDARG00000036344	1404.83924662757	895.332148109463	457.241817750318	137.969003434924	547.483658724529	664.485899691466	-1.03039	0.264107
calca	436744	ENSDARG00000056590	96.3151561053529	76.4662050817811	120.580648140907	7.77290160196755	40.6259958770852	70.300682141271	-1.30517	0.261763
calcoco1a	334971	ENSDARG00000036695	887.266892606887	633.99195352616	743.741437733112	737.454039486671	824.127344935157	715.526120972114	0.00769885	0.993255
calcoco1b	386968	ENSDARG00000016391	49.6168985997272	29.0377993981447	22.1868392579268	39.8361207100837	25.149426019148	49.1141751945866	0.178387	0.909931
calcoco2	553776	ENSDARG00000052515	31.1321716704171	71.626571848757	56.9140659225079	101.047720825578	69.6445643607175	68.3746360552088	0.582162	0.570431
calcr	560268	ENSDARG00000109526	66.1558647996363	67.7548652623377	35.6918718497083	0	11.6074273934529	28.8906912909333	-2.06583	0.216315
calcrl2	100537117	ENSDARG00000033955	12.6474447411069	7.7434131728386	0	65.0980509164782	43.5278527254484	30.8167373769955	2.77425	0.0670496
calcrla	445508	ENSDARG00000011473	153.715097622684	361.0366391836	384.893428865774	3374.41090795416	3770.47933163996	1878.85795695369	3.32626	1.32466e-09
calcrlb	567131	ENSDARG00000011571	35.0236931292192	14.5188996990724	19.292903702545	219.584470255583	450.755097112422	234.977622499591	3.71748	1.45e-08
cald1a	322909	ENSDARG00000112416	1857.22861621332	2892.16482005522	2076.88108357897	10419.5745974375	12090.1029158973	5364.03834968328	2.02973	2.45211e-05
cald1b	563892	ENSDARG00000086391	313.267477433572	435.566990972171	208.363359987487	68.012889017216	53.2007088866592	19.2604608606222	-2.7687	6.01105e-05
calhm1	101887127	ENSDARG00000005314	58.372821882032	43.5566990972171	66.5605177737804	6.8012889017216	52.2334232705381	10.5932534733422	-1.2749	0.368386
calhm2	368657	ENSDARG00000039482	149.823576163882	156.804116749982	130.227099992179	30.1199937076242	20.3129979385426	51.0402212806488	-2.10587	0.00169193
calhm3	100005130	ENSDARG00000079602	32.1050520351176	31.9415793379592	84.8887762911982	0	27.0839972513901	37.5578986782133	-1.20401	0.560875
calm1a	406660	ENSDARG00000021811	1517.69336893283	2400.45808357996	3341.5309212808	3293.76705383375	4029.71187676041	3523.70131445083	0.579337	0.329812
calm1b	368217	ENSDARG00000034187	1194.69708785226	903.075561282301	1469.15461694881	340.06444508608	705.151214152265	1301.04413113503	-0.604301	0.477982
calm2a	336121	ENSDARG00000111871	1254.04279009899	1174.09502233165	1413.20519621142	1281.5571516244	1935.53851785827	2610.75546965734	0.60136	0.28666
calm2b	192322	ENSDARG00000015050	6503.70523802307	8255.44636889255	14385.7536458027	8753.2588165157	11634.5113907043	9654.30600638687	0.0437405	0.962782
calm3a	327379	ENSDARG00000100825	950.504116312422	1458.66545643347	3399.40963238844	2471.78270942568	1998.41208290614	1204.74182683192	-0.0335902	0.978719
calm3b	321808	ENSDARG00000074057	5783.77376814467	6287.65149634494	10249.3550919771	7573.72099841713	9291.74562845906	8881.96152587592	0.20604	0.766127
calml4a	560151	ENSDARG00000075800	15.5660858352085	50.3321856234509	80.0655503655619	11.6593524029513	15.4765698579372	7.70418434424888	-2.067	0.0888353
calml4b	100321746	ENSDARG00000059347	15.5660858352085	29.0377993981447	11.575742221527	24.2903175061486	3.86914246448431	32.7427834630577	0.116522	0.962412
caln1	562420	ENSDARG00000088898	55.4541807879304	22.262312871911	18.3282585174178	0	16.4438554740583	0	-2.5461	0.304895
caln2	100007635	ENSDARG00000069766	71.9931469878395	33.8774326311689	122.509938511161	94.2464319238565	45.4624239576906	16.3713917315289	-0.549321	0.718037
calr	325317	ENSDARG00000076290	2461.38732269235	3352.89790383911	1987.16908136214	1222.2887769094	2330.19104923567	3924.31890035177	-0.0613147	0.956714
calr3a	30248	ENSDARG00000103979	1687.94743275543	2143.95752222969	1271.40235399772	1249.49393251628	1633.7454056285	2443.18946016992	0.0617462	0.94735
calr3b	321315	ENSDARG00000102808	278.243784304353	421.048091273099	245.984522207449	437.225715110674	911.183050386054	509.439189763457	0.974829	0.112315
calua	415241	ENSDARG00000045676	924.236346465507	795.635703509166	586.50427255737	677.214052071422	1034.99560924955	970.727227375358	0.218206	0.759602
calub	394057	ENSDARG00000005115	740.361957537106	476.219910129574	249.843102947958	61.2116001154944	369.503105358251	494.99384411799	-0.663629	0.588276
caly	100307104	ENSDARG00000036008	49.6168985997272	33.8774326311689	44.3736785158536	16.517415904181	13.5419986256951	0	-2.08914	0.206646
camk1a	555945	ENSDARG00000114234	16.5389661999091	15.4868263456772	12.5403874066543	0	7.73828492896861	9.63023043031109	-1.35901	1
camk1b	794026	ENSDARG00000029474	79.7761899054438	53.2359655632653	81.0301955506892	65.0980509164782	81.2519917541704	69.3376590982399	0.0110633	0.993847
camk1da	100144566	ENSDARG00000111604	172.199824551995	97.7605913070873	63.6665822183987	15.5458032039351	54.1679945027803	62.5964977970221	-1.33411	0.189012
camk1db	791176	ENSDARG00000017446	145.93205470508	81.3058383148053	106.110970363998	16.517415904181	59.0044225833857	51.0402212806488	-1.39702	0.119269
camk1ga	335654	ENSDARG00000044526	446.552087397545	314.576160146568	169.777552582396	125.338038331727	41.5932814932063	69.3376590982399	-1.97826	0.00632828
camk1gb	393802	ENSDARG00000008788	395.962308433117	226.494835305529	168.812907397269	48.5806350122972	32.8877109481166	38.5209217212444	-2.72129	6.46739e-06
camk2a	550436	ENSDARG00000053617	26.2677698469144	72.5944984953618	146.626068139342	51.495473113035	32.8877109481166	6.74116130121777	-1.42999	0.295297
camk2b	798222	ENSDARG00000100089	19.4576072940107	27.1019461049351	9.64645185127252	5.82967620147566	0	20.2234839036533	-1.10894	1
camk2b1	562064	ENSDARG00000011065	1579.95771227367	1263.1442738193	2494.57244873907	573.251493145106	1010.81346884652	1422.38503455695	-0.82814	0.211883
camk2d1	445208	ENSDARG00000043010	362.884376033299	244.885441591021	354.024782941702	59.2683747150025	97.6958472282287	125.192995594044	-1.76912	0.00147617
camk2d2	436815	ENSDARG00000014273	1701.56775786123	937.920920560075	2891.04161982638	309.944451378456	462.362524505875	828.199817006754	-1.78887	0.00703536
camk2g1	791855	ENSDARG00000071395	2541.16351259779	2044.26107762939	2772.39026205572	1748.9028604427	2152.2104958694	2068.57349643082	-0.30162	0.577822
camk2g2	793359	ENSDARG00000116258	1601.36108029708	1216.68379478226	2480.10277096217	1458.39066306916	1526.37670223906	1556.24523753827	-0.222477	0.759738
camk2n1a	553607	ENSDARG00000025855	615.833270855438	450.085890671243	1246.32157918441	139.912228835416	220.541120475605	405.432701116097	-1.59406	0.0243571
camk2n1b	100004137		10.7016840117059	7.7434131728386	0.964645185127252	0	0	0	-5.18425	1
camk2n2	436915	ENSDARG00000111102	390.125026244914	287.474214041633	429.267107381627	159.344482840335	177.980553366278	488.252682816773	-0.422958	0.664652
camk4	550270	ENSDARG00000005372	161.498140540289	107.439857773136	293.252136278685	34.006444508608	3.86914246448431	42.3730138933688	-2.80847	0.00531914
camkk1a	541526	ENSDARG00000110417	273.37938248085	146.156923637329	256.595619243849	150.599968538121	123.812558863498	147.34252558376	-0.680891	0.310204
camkk1b	100170786	ENSDARG00000114689	391.097906609615	211.975935606457	117.686712585525	15.5458032039351	20.3129979385426	33.7058065060888	-3.3728	4.97103e-06
camkva	567243	ENSDARG00000027963	11.6745643764064	10.6471931126531	21.2221940727996	22.3470921056567	5.80371369672646	0	-0.629711	1
camkvb	393422	ENSDARG00000117013	35.0236931292192	17.4226796388868	80.0655503655619	59.2683747150025	27.0839972513901	13.4823226024355	-0.408747	0.819798
camkvl	553431	ENSDARG00000057000	495.196105632572	235.206175124972	200.646198506468	21.3754794054108	63.8408506639911	127.119041680106	-2.13235	0.0137193
camlg	404622	ENSDARG00000100409	101.179557928856	71.626571848757	102.252389623489	146.713517737137	91.8921335315023	65.4855669261154	0.144684	0.900497
camsap1a	402833	ENSDARG00000019208	236.40992862223	107.439857773136	138.908906658324	76.7574033194295	45.4624239576906	87.635096915831	-1.20184	0.106893
camsap1b	561094	ENSDARG00000035122	324.942041809978	233.270321831763	297.110717019194	329.376705383375	232.148547869058	235.940645542622	-0.101064	0.904124
camsap2a	562741	ENSDARG00000111224	240.301450081032	216.815568839481	190.035101470069	102.019333525824	148.961984882646	160.824848186195	-0.652065	0.29875
camsap2b	558673		140.094772516877	126.798390705232	86.8180666614527	275.938006869848	305.66225469426	208.976000337751	1.16038	0.0347989
camsap3	556256	ENSDARG00000059475	426.121599738834	388.138585288535	407.080268123701	383.787016597148	297.923969765292	406.395724159128	-0.166637	0.809923
camta1	101883062	ENSDARG00000105435	24.3220091175133	10.6471931126531	3.85858074050901	10.6877397027054	0.967285616121077	0	-1.73672	1
camta1a	797322	ENSDARG00000116922	575.945175902716	357.16493259718	817.054471802783	211.811568653616	138.321843105314	278.313659435991	-1.47761	0.0125989
camta1b	497465	ENSDARG00000007824	1171.34795909944	517.840755933581	1773.98249544902	531.472147034531	581.338655288767	616.33474753991	-1.00203	0.131758
camta2	101886599		72.96602735254	83.2416916080149	89.7120022168345	118.536749430005	115.106988318408	73.1897512703643	0.319181	0.731361
cand1	406806	ENSDARG00000017841	933.965150112513	869.198128651132	899.049312538599	909.429487430203	944.070761334171	1332.82389155506	0.237764	0.699596
cand2	555955	ENSDARG00000109268	32.1050520351176	19.3585329320965	9.64645185127252	42.7509588108215	31.9204253319955	3.85209217212444	0.361702	0.869778
cant1a	406558	ENSDARG00000012192	235.437048257529	218.75142213269	302.898588129957	271.079943368618	296.95668414917	249.422968145057	0.110661	0.888244
cant1b	445201	ENSDARG00000102977	49.6168985997272	30.9736526913544	42.4443881455991	50.523860412789	22.2475691707848	48.1511521515555	-0.0249585	0.988692
canx	406757	ENSDARG00000037488	2951.71902650142	2643.40767187778	2100.03256802203	741.340490287655	1412.23699953677	2929.51609690063	-0.598232	0.476883
cap1	334527	ENSDARG00000016350	424.175839009433	639.799513405789	666.569822922931	609.201163054206	885.066338750785	987.098619106887	0.519905	0.389155
cap2	393809	ENSDARG00000104478	29.186410941016	46.4604790370316	43.4090333307264	5.82967620147566	11.6074273934529	25.0385991188088	-1.48658	0.240971
capga	565410	ENSDARG00000113278	6.81016255290374	5.80755987962895	6.75251629589077	13.6025778034432	1.93457123224215	0.963023043031109	-0.231864	1
capgb	336597	ENSDARG00000099672	202.359115857711	334.902619725269	677.180919959331	981.328827248403	1505.0964186844	1257.70809419863	1.62431	0.00864349
capn10	570311	ENSDARG00000076634	45.7253771409251	40.6529191574026	15.434322962036	9.71612700245943	43.5278527254484	18.2974378175911	-0.508912	0.77169
capn12	799247	ENSDARG00000116381	40.8609753174224	52.2680389166605	31.8332911091993	33.0348318083621	41.5932814932063	26.9646452048711	-0.298704	0.822311
capn15	100330198	ENSDARG00000060600	136.203251058075	114.215344299369	88.7473570317072	48.5806350122972	142.190985569798	67.4116130121777	-0.393539	0.723506
capn1a	393417	ENSDARG00000052702	417.365676456529	442.342477498405	693.579888106495	282.739295771569	438.180384102848	379.431078954257	-0.497365	0.442316
capn1b	565106	ENSDARG00000117045	176.091346010797	156.804116749982	290.358200723303	2.91483810073783	21.2802835546637	118.451834292826	-2.1272	0.108891
capn2a	541374	ENSDARG00000091699	17.5118465646096	36.7812125709833	29.9040007389448	78.7006287199214	107.36870338944	107.858580819484	1.8035	0.0143572
capn2b	563053	ENSDARG00000055592	146.904935069781	304.89689368052	572.034594780461	421.679911906739	449.787811496301	421.804092847626	0.337002	0.735489
capn3a	447832	ENSDARG00000041864	46.6982575056256	62.9152320293136	22.1868392579268	108.820622427546	42.5605671093274	22.1495299897155	0.396762	0.806025
capn3b	100034405	ENSDARG00000113539	51.5626593291283	33.8774326311689	27.9747103686903	14.5741905036891	10.6401417773318	10.5932534733422	-1.66331	0.1303
capn5a	563346	ENSDARG00000103317	29.186410941016	19.3585329320965	18.3282585174178	46.6374096118053	42.5605671093274	12.5192995594044	0.605029	0.698913
capn5b	100006332	ENSDARG00000116589	67.1287451643368	17.4226796388868	9.64645185127252	41.7793461105756	1.93457123224215	10.5932534733422	-0.794621	0.732116
[truncated: 25,517 more rows]

## Sheet: 2 Ens95 kdrlCherry
ID	Ensdarg	Matched NCBI ID	WTneg08	WTneg11	WTneg14	WTkdrl02	WTkdrl04	WTkdrl10	log2FoldChange	padj
a1cf	ENSDARG00000002968	562916	11.6692567417571	20.3464131165532	20.2489975832119	31.091192004135	10.6484009374597	4.80983288246677	-0.167478	0.954075
a2ml	ENSDARG00000056314	100006972	22.3660754217011	52.3193480139938	215.025069574108	0	53.2420046872986	139.485153591536	-0.588023	0.905771		total detected genes	25704
aaas	ENSDARG00000102274	378454	295.62117079118	531.913371475604	395.337571862709	353.662309047036	490.794479572007	773.421127500657	0.403848	0.651723		with NCBI ID	21489
aacs	ENSDARG00000012468	393984	80.7123591304867	33.9106885275886	44.3549470870357	40.8071895054272	16.4566196306196	22.1252312593472	-1.00189	0.424128		kdrl-pos-enriched	1632
aadac	ENSDARG00000063621	100148912	22.3660754217011	19.3775363014792	0.964237980152949	23.3183940031013	1.93607289771995	4.80983288246677	-0.506562	0.886353
aadacl4	ENSDARG00000044802	569798	16.5314470508226	15.5020290411834	3.8569519206118	0	0	2.88589972948006	-3.6336	0.219155
aadat	ENSDARG00000011410	557979	29.1731418543928	71.696884315473	63.6397066900947	77.7279800103375	30.0091299146592	79.8432258489484	0.189288	0.913213
aagab	ENSDARG00000041170	436696	152.672775704656	152.113659966612	255.523064740532	147.683162019641	210.063909402614	300.133571865927	0.231612	0.834419
aak1a	ENSDARG00000011855	568999	72.932854635982	53.2882248290678	25.0701874839767	56.3527855074947	28.0730570169393	55.7940614366146	-0.109503	0.954935
aak1b	ENSDARG00000077686	100534954	218.798563907946	202.495254350458	197.668785931355	270.104730535923	365.91777766907	269.350641418139	0.548666	0.373526
aamdc	ENSDARG00000103957	553802	200.322240733497	247.06358784386	197.668785931355	232.212340280883	381.40636085083	165.458251156857	0.272323	0.788259
aamp	ENSDARG00000045019	405874	429.817623321387	946.592648327259	918.918795085761	848.206581862808	930.283027354436	1039.88586918932	0.296154	0.739399
aanat1	ENSDARG00000036567	393677	63.208474017851	62.9769929798074	22.1774735435178	60.2391845080116	44.5296766475588	38.4786630597342	-0.0505752	0.980351
aanat2	ENSDARG00000079802	30685	69.0431023887296	97.8565583224699	92.5668460946832	193.348350275715	155.853868266456	125.055654944136	0.870036	0.201257
aar2	ENSDARG00000018658	431768	119.60988160301	133.705000480206	191.883358050437	282.735527287603	234.264820624114	169.30611746283	0.624315	0.403011
aars	ENSDARG00000069142	324940	1031.75678358369	1254.69547552078	1197.58357134996	837.518984611387	905.114079684076	1824.85059560789	0.0341612	0.978445
aars2	ENSDARG00000107385	100536819	81.6847971922998	119.171848254097	107.99465377713	158.370759271063	142.301357982416	155.838585391923	0.5637	0.448867
aarsd1	ENSDARG00000015747	445178	46.6770269670285	31.9729348974407	52.0688509282593	44.6935885059441	28.0730570169393	44.2504625186943	-0.15976	0.924366
aasdh	ENSDARG00000022730	570338	37.9250844107106	17.4397826713313	39.5337571862709	56.3527855074947	22.2648383237794	5.77179945896013	-0.169575	0.948482
aasdhppt	ENSDARG00000037501	619247	87.5194255631784	105.607572843062	107.99465377713	115.620370265377	45.4977130964188	50.9842285541478	-0.505725	0.660063
aass	ENSDARG00000051816	556229	213.93637359888	187.962102124348	233.345591197014	326.457516043418	258.465731845613	195.279215028151	0.296487	0.726981
aatf	ENSDARG00000025467	559477	147.81058539559	247.06358784386	262.272730601602	200.149548526619	136.493139289256	268.388674841646	-0.119203	0.923306
aatka	ENSDARG00000078222	100004850	232.412696773329	135.642754110354	205.382689772578	172.944755523001	236.200893521834	197.203148181138	0.0805268	0.945306
aatkb	ENSDARG00000104442	555739	163.3695943846	147.269275891242	108.958891757283	50.5231870067194	24.2009112214994	92.3487913433621	-1.32836	0.126707
abat	ENSDARG00000006031	378968	659.313005909277	545.477646886639	817.673807169701	428.475489806986	452.073021617608	865.769918844019	-0.211777	0.830915
abca12	ENSDARG00000074749		279.089723740358	558.073045482601	1738.52107821577	358.520307797682	297.187189800012	396.330229515262	-1.29178	0.149442
abca1a	ENSDARG00000074635	558924	2802.56649414533	3274.80363494998	2847.39475539166	9886.99905731493	7203.15921596707	5387.01282836279	1.33257	0.0020223
abca1b	ENSDARG00000079009	100136868	339.380883572769	769.288191168724	629.647401039876	332.287114544193	557.588994543345	868.655818573499	0.0166947	0.991954
abca2	ENSDARG00000013500	100006090	180.873479497235	124.016232329467	192.84759603059	91.3303765121466	95.8356084371375	96.1966576493355	-0.812735	0.217141
abca3b	ENSDARG00000100524	564344	1154.28397937214	1029.91605442362	1554.35162400655	1053.21412914007	1292.32865922807	1052.39143468373	-0.137829	0.865923
abca4a	ENSDARG00000057169	798993	176.983727249983	99.7943119526178	53.9973268885652	11.6591970015506	67.7625514201982	82.7291255784285	-1.02833	0.450167
abca4b	ENSDARG00000062661	555506	695.293214196361	420.492537742098	80.9959903328478	44.6935885059441	67.7625514201982	81.7671590019352	-2.62328	0.00286873
abca5	ENSDARG00000074041	100151075	392.86497697249	432.119059522986	452.227612691733	735.501010847819	921.570699314696	496.374753470571	0.75363	0.176402
abcb10	ENSDARG00000061591	100003744	115.720129355758	180.211087603756	199.597261891661	326.457516043418	202.319617811735	154.87661881543	0.464212	0.618971
abcb11a	ENSDARG00000011573	797269	34.0353321634582	24.221920376849	18.320521622906	168.086756772355	178.118706590235	104.854356837776	2.5585	7.83836e-05
abcb11b	ENSDARG00000070078	571189	58.3462837087856	43.5994566783282	107.99465377713	18.4603952524552	25.1689476703593	71.1855266605083	-0.870492	0.524582
abcb4	ENSDARG00000010936	100136865	32.0904560398321	10.6576449658136	41.4622331465768	542.152660572104	787.013632923159	1465.07509599938	5.05221	7.16045e-13
abcb5	ENSDARG00000021787	798527	246.999267700526	237.37481969312	602.648737595593	119.506769265894	140.365285084696	290.513906100993	-0.981832	0.260352
abcb6a	ENSDARG00000063297	564067	18.4763231744488	27.1285508220709	6.74966586107065	36.9207905049103	10.6484009374597	19.2393315298671	0.351742	0.88296
abcb6b	ENSDARG00000074254	100004801	10.696818679944	4.8443840753698	2.89271394045885	9.71599750129219	1.93607289771995	0	-0.662208	0.884349
abcb7	ENSDARG00000062795	566515	284.924352111236	323.604856234702	300.84224980772	261.36033278476	253.625549601313	419.417427351103	0.0392136	0.973316
abcb8	ENSDARG00000056672	548340	184.763231744488	214.121776131345	148.492648943554	96.1883752627927	159.726014061896	125.055654944136	-0.522817	0.511022
abcb9	ENSDARG00000056200	570148	90.4367397486176	57.1637320893636	89.6741321542243	3.88639900051688	74.538806562218	165.458251156857	0.0397322	0.990243
abcc1	ENSDARG00000104719	100002010	305.345551409311	266.441124145339	217.917783514567	344.917911295873	422.063891702949	216.442479711005	0.316495	0.721816
abcc10	ENSDARG00000077988	556709	164.342032446413	116.265217808875	76.174800432083	186.54715202481	148.109576675576	101.006490531802	0.288186	0.802248
abcc12	ENSDARG00000013050	568482	18.4763231744488	41.6617030481803	69.4251345710124	316.741518542125	439.488547782428	246.263443582299	2.95161	1.106e-05
abcc13	ENSDARG00000062519	559093	116.692567417571	38.7550726029584	57.854278809177	10.6875972514214	28.0730570169393	68.2996269310282	-0.994182	0.499994
abcc2	ENSDARG00000014031	393561	50.5667792142808	74.6035147606949	206.346927752731	2082.13826452692	2325.22355016166	1763.28473471232	4.21813	3.57697e-11
abcc3	ENSDARG00000096662	323301	127.389386097515	50.3815943838459	45.3191850671886	122.421568516282	39.689494403259	76.9573261194684	0.0998473	0.959452
abcc4	ENSDARG00000058953	368620	36.9526463488975	36.8173189728105	17.3562836427531	112.705571014989	71.6346972156381	48.0983288246677	1.35097	0.16118
abcc5	ENSDARG00000061233	336147	599.021846076865	507.691451098755	321.091247390932	648.057033336189	539.196302015006	573.332079590039	0.302278	0.705011
abcc6a	ENSDARG00000016750	566555	83.629673315926	62.0081161647334	35.6768052656591	60.2391845080116	81.3150617042379	26.9350641418139	-0.105847	0.955694
abcc6b.1	ENSDARG00000105403	110439293	24.3109515453273	38.7550726029584	34.7125672855062	49.5515872565902	33.8812757100991	18.2773649533737	0.0566459	0.979735
abcc6b.2	ENSDARG00000094901	100002917	19.4487612362619	40.6928262331063	14.4635697022942	80.6427792607252	76.474879459938	16.353431800387	1.21729	0.387064
abcc8	ENSDARG00000051879	553281	158.507404075534	64.9147466099553	196.704547951202	54.4095860072363	53.2420046872986	113.512056026216	-0.92562	0.360631
abcc8b	ENSDARG00000077007	100329706	167.259346631852	116.265217808875	34.7125672855062	58.2959850077531	144.237430880136	318.4109368193	0.711148	0.624055
abcc9	ENSDARG00000015985	561160	55.4289695233463	24.221920376849	21.2132355633649	15.5455960020675	56.1461140338785	44.2504625186943	0.201215	0.924795
abcd1	ENSDARG00000074876	566367	20.4211992980749	26.1596740069969	3.8569519206118	32.0627917542642	31.9452028123792	14.4294986474003	0.637128	0.763426
abcd2	ENSDARG00000059409	100537809	191.570298177179	217.028406576567	134.993317221413	135.052365267961	178.118706590235	153.914652238937	-0.218795	0.82232
ABCD2oneOfMany	ENSDARG00000099178		29.1731418543928	24.221920376849	15.4278076824472	0	30.0091299146592	9.61966576493355	-0.796225	0.780953
abcd3a	ENSDARG00000104085	406803	446.34907037221	512.535835174125	759.819528360524	375.037503549879	625.351545963544	657.023171744961	-0.0523877	0.964524
abcd3b	ENSDARG00000002947	100170781	51.5392172760939	100.763188767692	7.7139038412236	38.8639900051688	22.2648383237794	25.9730975653206	-0.87743	0.620952
abcd4	ENSDARG00000061770	767748	152.672775704656	207.339638425827	215.989307554261	234.155539781142	223.616419686654	228.948045205418	0.253614	0.760357
abce1	ENSDARG00000007216	406324	1434.34614117431	2709.94845176186	1909.19120070284	3057.62441365665	2622.41073996167	3464.04164195257	0.595071	0.314997
abcf1	ENSDARG00000031795	406467	886.863512373541	1705.22319453017	1651.739660002	1845.06792549539	2408.47468476362	2343.35058033781	0.636417	0.296449
abcf2a	ENSDARG00000038785	336770	663.202758156529	1185.90522165053	680.752013987982	913.303765121466	921.570699314696	2070.1520726137	0.626288	0.44513
abcf2b	ENSDARG00000052331	100000576	53.4840933997201	35.8484421577365	60.7469927496358	15.5455960020675	18.3926925283395	27.8970307183073	-1.27903	0.219348
abcf3	ENSDARG00000089705	100331227	88.4918636249915	97.8565583224699	65.5681826504006	197.234749276231	64.8584420736183	215.480513134511	0.922826	0.324944
abcg1	ENSDARG00000063475	556979	446.34907037221	192.806486199718	89.6741321542243	32.0627917542642	52.2739682384386	92.3487913433621	-2.04422	0.0227814
abcg2a	ENSDARG00000100075	735312	44.7321508434023	69.7591306853251	127.279413380189	3365.62153444761	3530.42892899233	2577.1084584257	5.29195	1.78862e-22
abcg2b	ENSDARG00000079361	570453	11.6692567417571	12.5953985959615	8.67814182137655	23.3183940031013	10.6484009374597	2.88589972948006	0.161522	0.961119
abcg2c	ENSDARG00000058574	569858	331.601379078265	408.866015961211	298.913773847414	285.65032653799	527.579864628686	325.144702854754	0.131258	0.898842
abcg2d	ENSDARG00000016818	735310	28.2007037925797	24.221920376849	9.6423798015295	11.6591970015506	6.77625514201982	14.4294986474003	-0.916967	0.63039
abcg4a	ENSDARG00000061047	564842	24.3109515453273	12.5953985959615	16.3920456626001	0	9.68036448859975	13.467532070907	-1.20275	0.650815
abcg4b	ENSDARG00000078068	794238	94.32649199587	109.483080103357	58.8185167893299	15.5455960020675	21.2968018749194	115.435989179203	-0.786071	0.623964
abcg5	ENSDARG00000063078	557317	10.696818679944	2.90663044522188	13.4993317221413	0	5.80821869315985	17.3153983768804	-0.228715	0.960153
abcg8	ENSDARG00000063059	100136850	29.1731418543928	10.6576449658136	16.3920456626001	41.7787892555564	1.93607289771995	0	-0.363259	0.92812
abch1	ENSDARG00000071341	558667	20.4211992980749	12.5953985959615	12.5350937419883	0	0	6.73376603545348	-2.75636	0.332846
abhd10a	ENSDARG00000076435	568517	206.156869104376	143.393768630946	244.916446958849	196.263149526102	221.680346788934	93.3107579198554	-0.217625	0.854171
abhd11	ENSDARG00000069501	446169	12.6416948035702	7.75101452059168	3.8569519206118	0	1.93607289771995	3.84786630597342	-2.06661	0.524671
abhd12	ENSDARG00000071004	767657	435.652251692266	733.439749010987	1237.11732853623	538.266261571587	952.547865678215	718.589032640536	-0.123117	0.922121
abhd13	ENSDARG00000059209	561333	73.9052926977951	40.6928262331063	37.605281225965	191.405150775456	81.3150617042379	68.2996269310282	1.16388	0.228881
abhd14a	ENSDARG00000058367	404598	50.5667792142808	64.9147466099553	36.6410432458121	12.6307967516798	46.4657495452788	32.7068636007741	-0.728469	0.605963
abhd14b	ENSDARG00000100531	393338	77.7950449450474	74.6035147606949	130.172127320648	172.944755523001	245.881258010434	156.800551968417	1.02643	0.131338
abhd15a	ENSDARG00000078768	560644	254.77877219503	358.484421577365	422.336235306992	371.151104549362	491.762516020867	303.019471595407	0.170981	0.859074
abhd16a	ENSDARG00000078929	564613	561.096761666155	461.185363975205	551.544124647487	493.572673065643	429.808183293829	695.501834804695	0.0407434	0.970157
abhd17aa	ENSDARG00000091433	322121	74.8777307596082	76.5412683908428	40.4979951664239	89.3871770118881	89.0593532951177	83.6910921549219	0.449925	0.673964
abhd17ab	ENSDARG00000043084	100003419	28.2007037925797	31.0040580823667	6.74966586107065	15.5455960020675	48.4018224429987	38.4786630597342	0.635288	0.740312
abhd17b	ENSDARG00000035571	437017	319.932122336508	328.449240310072	323.019723351238	1175.63569765635	1414.30125178442	797.470291912991	1.80203	2.04343e-05
abhd17c	ENSDARG00000058452	393126	672.92713877466	527.068987400234	782.961239884195	609.19304333102	614.703145026084	626.240241297174	-0.100028	0.906367
abhd18	ENSDARG00000101961	503769	167.259346631852	155.020290411834	148.492648943554	34.0059912545227	113.260264516617	129.865487826603	-0.764342	0.450264
abhd2a	ENSDARG00000025797	393888	173.093975002731	158.895797672129	189.954882090131	658.74463058761	957.388047922515	672.414636968855	2.13245	1.86388e-07
abhd2b	ENSDARG00000045804	559290	294.648732729367	124.016232329467	197.668785931355	0	67.7625514201982	54.8320948601212	-2.32971	0.113467
abhd3	ENSDARG00000018809	447830	447.321508434023	444.714458118947	844.672470613984	280.792327787344	563.397213236505	483.869187976157	-0.387039	0.677391
abhd4	ENSDARG00000102887	550276	249.916581885965	225.748297912233	263.236968581755	828.774586860224	518.867536588946	459.820023563824	1.29048	0.00912002
abhd5b	ENSDARG00000100388	100329433	24.3109515453273	7.75101452059168	0.964237980152949	58.2959850077531	0.968036448859975	12.5055654944136	1.11991	0.714952
abhd6a	ENSDARG00000060756	799085	500.805601833743	458.278733529983	235.27406715732	75.7847805100791	82.2830981530978	121.207788638163	-2.09636	0.00018751
abhd6b	ENSDARG00000070894	558995	21.393637359888	29.0663044522188	13.4993317221413	20.4035947527136	0.968036448859975	18.2773649533737	-0.689804	0.784453
abhd8a	ENSDARG00000103518		21.393637359888	4.8443840753698	5.7854278809177	41.7787892555564	0	0.961966576493355	0.416399	0.927004
abhd8b	ENSDARG00000076620	101883400	97.2438061813093	81.3856524662126	49.1761369878004	117.563569765635	25.1689476703593	108.702223143749	0.142441	0.939661
abi1a	ENSDARG00000010155	393711	597.076969953239	635.583190688517	643.146732762017	2573.7677380923	2910.88560172194	1950.86821712852	1.98692	6.09881e-08
abi1b	ENSDARG00000062991	767738	297.566046914806	275.161015481005	579.507026071923	103.961173263826	239.105002868414	141.409086744523	-1.24995	0.0754521
abi2a	ENSDARG00000058207	767646	118.637443541197	122.078478699319	71.3536105313183	42.7503890056856	51.3059317895787	81.7671590019352	-0.827558	0.361348
abi2b	ENSDARG00000014875	692331	161.424718260973	138.549384555576	154.278076824472	80.6427792607252	155.853868266456	138.523187015043	-0.27647	0.78697
abi3a	ENSDARG00000060072	767807	255.751210256843	313.916088083963	694.251345710124	93.273576012405	53.2420046872986	157.76251854491	-2.05438	0.00466037
abi3b	ENSDARG00000063283	566059	47.6494650288415	133.705000480206	197.668785931355	101.046374013439	114.228300965477	123.131721791149	-0.16359	0.915559
abi3bpa	ENSDARG00000062156	101884149	58.3462837087856	211.215145686123	151.385362884013	8.74439775116297	9.68036448859975	6.73376603545348	-4.06475	1.00455e-06
abi3bpb	ENSDARG00000071095	100149890	2761.72409554918	4936.42737280182	3439.43687520557	594.619047079082	606.958853435204	1209.19198665215	-2.20785	1.4182e-05
abl1	ENSDARG00000035187	100000720	89.4643016868045	68.7902538702511	24.1059495038237	123.393168266411	130.684920596097	57.7179945896013	0.773877	0.519369
abl2	ENSDARG00000013841	570636	234.357572896955	291.631921337262	266.129682522214	286.62192628812	345.589012243011	201.051014487111	0.0730162	0.947334
ablim1a	ENSDARG00000060149	100003558	265.475590874974	43.5994566783282	175.491312387837	101.046374013439	126.812774800657	126.979588097123	-0.449495	0.747517
ablim1b	ENSDARG00000045064	541550	1586.04647881715	1926.12710836703	2470.37770515186	1462.25762394447	1318.46564334729	1040.84783576581	-0.646607	0.220893
ablim2	ENSDARG00000055223	568454	92.3816158722438	55.2259784592157	150.42112490386	549.925458573138	564.365249685365	133.713354132576	2.06603	0.0106939
ablim3	ENSDARG00000088168	566821	866.442313075466	410.803769591359	338.447531033685	199.17794877649	238.136966419554	211.632646828538	-1.31595	0.0330823
abo	ENSDARG00000019207	563897	11.6692567417571	7.75101452059168	1.9284759603059	45.6651882560733	0	3.84786630597342	1.21369	0.732359
abr	ENSDARG00000095180	565190	20.4211992980749	31.9729348974407	13.4993317221413	59.2675847578824	16.4566196306196	7.69573261194684	0.340081	0.888782
abraa	ENSDARG00000038583	324520	66.1257882032903	71.696884315473	55.9258028488711	19.4319950025844	24.2009112214994	23.0871978358405	-1.53791	0.0589717
abrab	ENSDARG00000033854	445477	154.617651828282	76.5412683908428	79.0675143725419	136.99556476822	75.506843011078	21.1632646828538	-0.408962	0.800372
abracl	ENSDARG00000042876	336650	330.628941016452	371.079820173326	737.642054817006	734.529411097689	961.260193717955	1201.4962540402	1.00927	0.107497
abraxas1	ENSDARG00000043339	449820	84.6021113777391	107.54532647321	120.529747519119	58.2959850077531	130.684920596097	112.550089449723	-0.0523437	0.973251
abraxas2	ENSDARG00000098907	406584	68.0706643269165	68.7902538702511	46.2834230473416	81.6143790108544	49.3698588918587	64.4517606250548	0.0937402	0.951316
abt1	ENSDARG00000043666	553568	126.416948035702	189.899855754496	183.20521622906	138.938764268478	208.127836504895	177.001850074777	0.0691947	0.954075
abtb1	ENSDARG00000063354	100536189	206.156869104376	294.538551782484	318.198533450473	292.451524788895	390.11868889057	294.361772406967	0.25455	0.763943
abtb2a	ENSDARG00000059751	559451	108.913062923066	84.2922829114345	71.3536105313183	64.1255835085285	49.3698588918587	57.7179945896013	-0.627755	0.490732
abtb2b	ENSDARG00000062000	100007078	167.259346631852	181.17996441883	134.02907924126	223.46794252972	224.584456135514	174.115950345297	0.366869	0.641589
acaa1	ENSDARG00000004687	431754	87.5194255631784	147.269275891242	257.451540700838	64.1255835085285	209.095872953755	225.100178899445	0.0177158	0.992999
acaa2	ENSDARG00000038881	406325	406.479109837873	500.909313393237	454.156088652039	206.950746777524	449.168912271028	708.007400299109	0.00276708	0.999827
acaca	ENSDARG00000078512	559403	635.974492425763	768.31931435365	948.810172470502	555.755057073913	454.977130964188	587.76157823744	-0.557859	0.319757
acacb	ENSDARG00000061994	556236	257.69608638047	211.215145686123	173.562836427531	187.518751774939	137.461175738116	268.388674841646	-0.114638	0.922688
acad11	ENSDARG00000045411	393147	68.0706643269165	110.451956918431	122.458223479425	162.25715827158	130.684920596097	80.8051924254418	0.312264	0.785226
acad8	ENSDARG00000042658	394130	205.184431042563	232.53043561775	322.055485371085	133.109165767703	101.643827130297	181.811682957244	-0.866998	0.188769
acad9	ENSDARG00000055620	724002	128.361824159328	93.0121742471001	144.635697022942	186.54715202481	160.694050510756	127.941554673616	0.376539	0.675803
acadl	ENSDARG00000088357	394156	583.462837087856	498.971559763089	730.892388955936	530.493463570554	756.03646655964	720.512965793523	0.146433	0.865473
acadm	ENSDARG00000038900	406283	1017.1702126565	1105.48844599939	1484.92648943554	978.400948380124	968.036448859975	1315.00831006642	-0.14552	0.860554
acads	ENSDARG00000030781	445288	158.507404075534	228.654928357454	368.338908418427	147.683162019641	304.931481390892	243.377543852819	-0.118382	0.929306
acadsb	ENSDARG00000076780	110437777	253.806334133217	529.975617845456	664.359968325382	512.033068318098	733.771628235861	466.553789599277	0.241754	0.820112
acadvl	ENSDARG00000016687	573723	677.789329083726	837.109568223901	889.027417701019	1013.37853938478	1028.05470868929	1112.03336242632	0.39154	0.484638
acana	ENSDARG00000035891	497505	217.826125846133	176.335580343461	94.495322054989	20.4035947527136	87.1232803973977	47.1363622481744	-1.6596	0.0632671
acanb	ENSDARG00000045799	559593	38.8975224725237	29.0663044522188	7.7139038412236	23.3183940031013	5.80821869315985	2.88589972948006	-1.24155	0.561761
acap1	ENSDARG00000056346	561771	82.6572352541129	180.211087603756	250.701874839767	551.868658073396	588.566160906865	875.389584608953	1.97268	0.00104868
acap2	ENSDARG00000060783	100124613	70.0155404505427	99.7943119526178	55.9258028488711	340.059912545227	478.210005736827	259.730975653206	2.25568	3.03539e-05
acap3a	ENSDARG00000075990	322991	54.4565314615332	40.6928262331063	9.6423798015295	31.091192004135	28.0730570169393	56.7560280131079	0.145869	0.949385
acap3b	ENSDARG00000099240	100009646	35.9802082870844	22.2841667467011	31.8198533450473	23.3183940031013	6.77625514201982	32.7068636007741	-0.520321	0.785015
acat1	ENSDARG00000045888	445290	706.962470938118	486.376161167128	558.293790508558	586.846249078048	458.849276759628	626.240241297174	-0.0671651	0.945685
acat2	ENSDARG00000007127	30643	270.33778118404	235.437066062972	324.948199311544	9.71599750129219	91.9634626416976	197.203148181138	-1.47468	0.224079
acbd3	ENSDARG00000042623	406270	545.537752677145	519.317972879642	775.247336042971	658.74463058761	774.42915908798	874.427618032459	0.326603	0.643159
acbd4	ENSDARG00000027070	406368	29.1731418543928	27.1285508220709	63.6397066900947	0	17.4246560794795	36.5547299067475	-1.15162	0.62103
acbd5a	ENSDARG00000034883	553674	257.69608638047	119.171848254097	183.20521622906	94.2451757625342	79.3789888065179	88.5009250373886	-1.09534	0.103339
acbd5b	ENSDARG00000058410	100004736	14.5865709271964	0.96887681507396	1.9284759603059	0	0	3.84786630597342	-2.18227	1
acbd6	ENSDARG00000039456	324090	249.916581885965	237.37481969312	228.524401296249	270.104730535923	194.575326220855	320.334869972287	0.133162	0.890583
acbd7	ENSDARG00000094730	619256	367.581587365349	429.212429077764	585.29245395284	48.5799875064609	127.780811249517	348.231900690594	-1.3975	0.135194
accs	ENSDARG00000052124	541510	220.743440031572	183.117718048978	165.848932586307	126.307967516798	64.8584420736183	191.431348722178	-0.574318	0.551195
acd	ENSDARG00000078055	794664	185.735669806301	171.491196268091	207.311165732884	214.723544778557	232.328747726394	260.692942229699	0.326167	0.663408
ace	ENSDARG00000079166	565980	162.397156322787	266.441124145339	166.81317056646	2101.5702595295	2393.95413803072	1300.57881141902	3.28254	2.23942e-12
ace2	ENSDARG00000016918	492331	7.77950449450474	29.0663044522188	221.774735435178	57.3243852576239	24.2009112214994	41.3645627892143	-1.07358	0.580551
acer1	ENSDARG00000010347	550266	29.1731418543928	14.5331522261094	36.6410432458121	60.2391845080116	34.8493121589591	25.9730975653206	0.591229	0.706351
acer2	ENSDARG00000077782	100331179	8.75194255631784	2.90663044522188	0.964237980152949	41.7787892555564	10.6484009374597	3.84786630597342	2.15688	0.353783
acer3	ENSDARG00000093366	555411	11.6692567417571	12.5953985959615	11.5708557618354	16.5171957521967	30.0091299146592	7.69573261194684	0.597361	0.784242
ache	ENSDARG00000031796	114549	1011.33558428562	510.598081543977	1491.67615529661	162.25715827158	196.511399118575	455.97215725785	-1.88703	0.00710208
acin1a	ENSDARG00000054290	368893	7802.84300798826	9334.15923642253	6387.11238053314	8385.87744336529	8664.89425374563	11486.8428899071	0.278727	0.680763
acin1b	ENSDARG00000026842	327495	1355.57865816745	1406.80913548739	1284.36498956373	1306.8016639238	1453.99074618768	1813.30699668997	0.176733	0.803555
ACKR2	ENSDARG00000086314	101887081	24.3109515453273	24.221920376849	11.5708557618354	251.644335283468	272.018242129653	354.965666726048	3.87009	9.4314e-12
ackr3a	ENSDARG00000062478	100000764	43.7597127815892	40.6928262331063	22.1774735435178	244.843137032563	119.068483209777	111.588122873229	2.15693	0.00286873
ackr3b	ENSDARG00000058179	561050	1079.40624861253	1745.91602076328	1509.03243893937	5573.0961667412	5784.98581838721	5418.75772538707	1.95258	1.81752e-07
ackr4a	ENSDARG00000078729	100003167	7.77950449450474	17.4397826713313	3.8569519206118	19.4319950025844	2.90410934657992	0	-0.380822	0.930782
ackr4b	ENSDARG00000040133	641390	65.1533501414772	71.696884315473	88.7098941740714	167.115157022226	99.7077542325774	75.0333929664817	0.599749	0.538853
aclya	ENSDARG00000099079	436922	336.46356938733	363.328805652735	535.152078984887	480.941876313963	650.520493633903	461.74395671681	0.367459	0.623729
aclyb	ENSDARG00000055652	794259	45.7045889052154	53.2882248290678	71.3536105313183	18.4603952524552	13.5525102840396	24.0491644123339	-1.60328	0.0825928
acmsd	ENSDARG00000062549	557166	9.72438061813093	20.3464131165532	36.6410432458121	2.91479925038766	13.5525102840396	36.5547299067475	-0.331166	0.905125
aco1	ENSDARG00000026376	568448	72.932854635982	90.1055438018782	72.3178485114712	49.5515872565902	86.1552439485377	156.800551968417	0.313749	0.814718
aco2	ENSDARG00000007294	322670	2069.34819553826	1823.42616596919	2292.95791680371	976.457748879865	1211.01359752383	2447.24297059909	-0.416452	0.621669
acod1	ENSDARG00000069844	795305	29.1731418543928	68.7902538702511	2.89271394045885	5.82959850077531	6.77625514201982	33.6688301772674	-1.12364	0.634685
acot11a	ENSDARG00000058229	554842	14.5865709271964	15.5020290411834	16.3920456626001	6.80119825090453	34.8493121589591	23.0871978358405	0.478061	0.827931
acot11b	ENSDARG00000042122	641574	22.3660754217011	17.4397826713313	5.7854278809177	47.6083877563317	33.8812757100991	46.174395671681	1.48585	0.225859
ACOT12	ENSDARG00000054534	100536873	71.9604165741689	169.553442637943	271.915110403132	189.461951275198	237.168929970694	152.952685662443	0.174774	0.901702
acot13	ENSDARG00000061728	564010	66.1257882032903	105.607572843062	182.240978248907	180.717553524035	183.926925283395	111.588122873229	0.427901	0.701791
acot14	ENSDARG00000089159	557184	145.865709271964	169.553442637943	176.45555036799	91.3303765121466	123.908665454077	47.1363622481744	-0.906761	0.253067
acot15	ENSDARG00000045522	557032	190.597860115366	181.17996441883	255.523064740532	232.212340280883	122.940629005217	155.838585391923	-0.295919	0.760173
acot16	ENSDARG00000069292	402867	14.5865709271964	5.81326089044376	22.1774735435178	16.5171957521967	0	9.61966576493355	-0.70416	0.833117
acot17	ENSDARG00000088524	572757	27.2282657307666	9.6887681507396	13.4993317221413	9.71599750129219	9.68036448859975	4.80983288246677	-1.05863	0.605311
acot18	ENSDARG00000033413	556673	84.6021113777391	110.451956918431	125.350937419883	93.273576012405	110.356155170037	77.9192926959617	-0.186593	0.869108
acot19	ENSDARG00000040427	492778	8.75194255631784	9.6887681507396	10.6066177816824	20.4035947527136	16.4566196306196	0	0.343388	0.92812
acot20	ENSDARG00000042510	553440	25.2833896071404	15.5020290411834	26.9986634442826	46.6367880062025	21.2968018749194	25.9730975653206	0.470147	0.781966
acot21	ENSDARG00000042513	562047	14.5865709271964	7.75101452059168	4.82118990076475	0	0	0	-5.66908	0.0828918
acot22	ENSDARG00000058945	553217	23.3385134835142	17.4397826713313	7.7139038412236	0	0	0	-6.50543	0.0106875
acot7	ENSDARG00000018653	447878	27.2282657307666	17.4397826713313	59.7827547694829	117.563569765635	52.2739682384386	51.9461951306412	1.0861	0.366196
acot8	ENSDARG00000014138	450052	44.7321508434023	26.1596740069969	54.9615648687181	157.399159520933	91.9634626416976	25.9730975653206	1.12931	0.360631
acot9.1	ENSDARG00000058352	798073	211.019059413441	166.646812192721	278.664776264202	346.861110796131	350.429194487311	250.111309888272	0.529504	0.455613
acot9.2	ENSDARG00000058390	798008	14.5865709271964	12.5953985959615	25.0701874839767	37.8923902550395	81.3150617042379	48.0983288246677	1.67873	0.0976414
acox1	ENSDARG00000014727	449662	562.069199727968	469.90525531087	668.216920245994	581.016650577273	462.721422555068	505.994419235505	-0.133693	0.873493
acox3	ENSDARG00000038865	406421	56.4014075851594	57.1637320893636	67.4966586107065	111.73397126486	81.3150617042379	66.3756937780415	0.518722	0.60122
acoxl	ENSDARG00000020149	569104	25.2833896071404	4.8443840753698	14.4635697022942	0	16.4566196306196	4.80983288246677	-1.06805	0.739399
acp1	ENSDARG00000076486	541489	222.688316155198	271.285508220709	296.985297887108	342.974711795614	533.388083321846	415.569561045129	0.70784	0.214275
acp2	ENSDARG00000007244	503759	73.9052926977951	64.9147466099553	26.9986634442826	25.2615935033597	46.4657495452788	92.3487913433621	-0.015001	0.994689
acp5a	ENSDARG00000019763	406801	43.7597127815892	180.211087603756	82.9244662931537	0	47.4337859941388	51.9461951306412	-1.6266	0.386205
acp5b	ENSDARG00000101456	436725	19.4487612362619	74.6035147606949	17.3562836427531	10.6875972514214	53.2420046872986	94.2727244963488	0.506049	0.81313
acp6	ENSDARG00000040064	558758	55.4289695233463	55.2259784592157	50.1403749679534	136.023965018091	92.9314990905576	106.778289990762	1.06209	0.122497
acp7	ENSDARG00000102421	571830	21.393637359888	33.9106885275886	19.284759603059	8.74439775116297	54.2100411361586	33.6688301772674	0.373512	0.857935
acsbg1	ENSDARG00000062077	100006023	16.5314470508226	4.8443840753698	9.6423798015295	0	2.90410934657992	6.73376603545348	-1.6854	0.585216
acsbg2	ENSDARG00000004094	335159	1119.27620914687	1064.79561976628	1616.06285473634	7020.77979443374	8934.97642297756	3779.56667904239	2.37665	1.19808e-06
acsf2	ENSDARG00000061201	751707	278.117285678545	425.336921817468	366.410432458121	460.53828156125	351.397230936171	401.140062397729	0.181221	0.833979
ACSF3	ENSDARG00000059503	562292	54.4565314615332	97.8565583224699	77.139038412236	146.711562269512	78.4109523576579	75.995359542975	0.392028	0.739405
acsl1a	ENSDARG00000030514	555308	358.829644809031	446.652211749095	542.865982826111	264.275132035148	223.616419686654	358.813533032021	-0.671247	0.274836
acsl1b	ENSDARG00000003854	445175	311.18017978019	427.274675447616	427.157425207757	474.140678063059	473.369823492528	323.220769701767	0.124534	0.894623
acsl2	ENSDARG00000078399	100332846	227.550506464264	282.912030001596	202.489975832119	36.9207905049103	66.7945149713382	82.7291255784285	-1.93489	0.0010313
acsl3a	ENSDARG00000032079	567157	21.393637359888	27.1285508220709	5.7854278809177	34.0059912545227	7.7442915908798	7.69573261194684	-0.135428	0.965391
acsl3b	ENSDARG00000014674	559656	1220.40976757543	1081.26652562254	1398.14507122178	1409.7912374375	1074.52045823457	1256.32834890032	0.0158239	0.988289
acsl4a	ENSDARG00000004078	393622	947.154672205952	389.488479659732	458.977278552804	980.344147880382	670.849259059962	682.034302733789	0.377856	0.684877
acsl4b	ENSDARG00000010752	334561	369.526463488975	562.917429557971	395.337571862709	780.194599353763	715.378935707521	492.526887164598	0.582356	0.357656
acsl5	ENSDARG00000075931	447860	14.5865709271964	9.6887681507396	38.569519206118	29.1479925038766	12.5844738351797	22.1252312593472	0.0228251	0.993796
acsm3	ENSDARG00000004880	100002035	166.286908570039	152.113659966612	113.780081658048	130.194366517315	153.917795368736	52.9081617071345	-0.358854	0.761463
acss1	ENSDARG00000044142	541435	190.597860115366	306.165073563371	195.740309971049	102.989573513697	110.356155170037	173.153983768804	-0.841277	0.226794
acss2	ENSDARG00000037781	436914	637.919368549389	524.162356955012	686.5374418689	353.662309047036	305.899517839752	569.484213284066	-0.58888	0.370315
acss2l	ENSDARG00000069029	560020	14.5865709271964	29.0663044522188	6.74966586107065	19.4319950025844	9.68036448859975	0.961966576493355	-0.745293	0.790473
acss3	ENSDARG00000032218	566019	395.782291157929	315.853841714111	510.08189150091	118.535169515765	211.999982300334	307.829304477874	-0.936404	0.183206
acta1a	ENSDARG00000036371	550445	641.809120796641	735.377502641135	315.305819510014	714.125816344976	792.821851616319	389.596463479809	0.164225	0.888782
acta1b	ENSDARG00000055618	407658	191.570298177179	105.607572843062	305.663439708485	131.165966267445	77.442915908798	155.838585391923	-0.726069	0.448296
acta2	ENSDARG00000045180	322509	214.908811660694	363.328805652735	313.377343549709	381.838701800783	249.753403805873	617.582542108734	0.486495	0.586513
actb1	ENSDARG00000037746	57934	33486.8770965957	39905.1293824512	20724.3669074273	58315.4170027557	99935.2427980595	96283.2346412199	1.43534	0.00370607
actb2	ENSDARG00000037870	57935	59952.7513869008	87988.5479609416	81887.9104644892	165296.322289984	183361.591997261	180787.188553279	1.20392	0.00146619
actc1a	ENSDARG00000042535	408256	1092.0479434161	1850.55471679126	1790.58992914403	220.553143279333	188.767107527695	202.974947640098	-2.95053	9.03152e-13
actc1b	ENSDARG00000099197	58114	1676.48321856577	2238.10544282085	3412.43821176129	468.311079562284	636.967983349863	801.318158218965	-1.94222	6.38952e-05
actc1c	ENSDARG00000079111	415164	83.629673315926	105.607572843062	283.485966164967	189.461951275198	75.506843011078	9.61966576493355	-0.783848	0.656853
actl6a	ENSDARG00000070828	192313	691.403461949109	733.439749010987	1147.44319638201	581.988250327402	751.19628431534	987.939674058675	-0.148224	0.878813
actl6b	ENSDARG00000034107	553775	14.5865709271964	14.5331522261094	53.9973268885652	0	0.968036448859975	8.65769918844019	-3.10879	0.135244
actn1	ENSDARG00000007219	560400	566.931390037033	1193.65623617112	1053.91211230717	959.940553127668	1715.36058737987	1723.84410507609	0.644343	0.373148
actn2b	ENSDARG00000071090	641575	141.975957024712	90.1055438018782	79.0675143725419	47.6083877563317	45.4977130964188	31.7448970242807	-1.31745	0.0828033
actn3a	ENSDARG00000013755	58037	82.6572352541129	64.9147466099553	111.851605697742	67.0403827589161	2.90410934657992	20.2012981063605	-1.52517	0.300716
actn3b	ENSDARG00000001431	323320	158.507404075534	137.580507740502	134.993317221413	97.1599750129219	71.6346972156381	67.3376603545348	-0.868423	0.191913
actn4	ENSDARG00000099786	322221	224.633192278824	194.744239829866	184.169454209213	534.37986257107	666.009076815663	465.591823022784	1.46485	0.000645731
actr1	ENSDARG00000011611	406681	1281.67336546966	1551.17178093341	2051.89842176548	1994.69428701529	2572.07284462095	2250.03982241796	0.480807	0.409118
actr10	ENSDARG00000038432	393139	423.010556888695	228.654928357454	331.697865172615	329.372315293805	268.146096334213	385.748597173835	-0.000114109	0.999827
actr2a	ENSDARG00000052438	406820	921.871282598812	1100.64406192402	1469.4986817531	2602.91573059618	2925.40614845484	2713.70771228775	1.23893	0.00234322
actr2b	ENSDARG00000070076	554861	35.9802082870844	29.0663044522188	19.284759603059	28.1763927537474	11.6164373863197	26.9350641418139	-0.33766	0.858984
actr3	ENSDARG00000091138	406250	29.1731418543928	19.3775363014792	16.3920456626001	4.85799875064609	15.4885831817596	43.288495942201	-0.0289555	0.992891
actr3b	ENSDARG00000008790	100038776	10.696818679944	2.90663044522188	3.8569519206118	0	0	6.73376603545348	-1.37348	1
actr5	ENSDARG00000098235	406809	84.6021113777391	91.0744206169522	71.3536105313183	135.052365267961	155.853868266456	68.2996269310282	0.540079	0.586469
actr6	ENSDARG00000021370	324822	165.314470508226	201.526377535384	287.342918085579	111.73397126486	170.374414999356	266.464741688659	-0.253976	0.82298
actr8	ENSDARG00000103610	326866	170.176660817291	174.397826713313	206.346927752731	298.28112328967	300.091299146592	193.355281875164	0.523102	0.454077
acvr1ba	ENSDARG00000018968	30183	1999.33265508772	1415.52902682305	1827.23097238984	1303.88686467341	1668.8948378346	2050.91274108383	-0.0613849	0.949746
acvr1bb	ENSDARG00000052142	559222	40.8423985961499	29.0663044522188	20.2489975832119	18.4603952524552	12.5844738351797	29.820963871294	-0.566535	0.741441
ACVR1C	ENSDARG00000086172	100331105	71.9604165741689	68.7902538702511	22.1774735435178	22.346794252972	6.77625514201982	6.73376603545348	-2.18427	0.0742467
acvr1l	ENSDARG00000014986	30615	594.1596557678	444.714458118947	502.367987659687	369.207905049103	464.657495452788	781.116860112604	0.0674605	0.954075
acvr2aa	ENSDARG00000011188	553359	1864.1637644957	1710.06757860554	1809.87468874709	1704.18596172665	2071.59800056035	2278.89881971276	0.169351	0.80694
acvr2ab	ENSDARG00000104700	100331014	33.0628941016452	43.5994566783282	7.7139038412236	11.6591970015506	24.2009112214994	23.0871978358405	-0.517179	0.803309
acvr2ba	ENSDARG00000044422	30457	94.32649199587	62.0081161647334	32.7840913252003	71.8983815095622	86.1552439485377	46.174395671681	0.110948	0.949385
acvr2bb	ENSDARG00000103108	100331938	31.118017978019	33.9106885275886	49.1761369878004	0	37.753421505539	19.2393315298671	-1.0027	0.674348
acvrl1	ENSDARG00000018179	266753	208.101745228002	344.92014616633	368.338908418427	7756.28080528155	9568.07226053199	5061.86812550803	4.60267	5.79719e-22
acy1	ENSDARG00000111129	100001620	232.412696773329	220.903913836863	314.341581529862	160.313958771321	249.753403805873	300.133571865927	-0.112211	0.920821
acy3.1	ENSDARG00000093003	791456	16.5314470508226	73.6346379456209	78.1032763923889	22.346794252972	63.8904056247583	87.5389584608953	0.0464755	0.985973
acy3.2	ENSDARG00000005525	436619	196.432488486245	343.951269351256	323.983961331391	947.309756375989	925.442845110136	479.059355093691	1.44402	0.00949269
acyp1	ENSDARG00000060126	571263	157.534966013721	116.265217808875	211.168117653496	140.881963768737	244.913221561574	95.2346910728421	-0.0118209	0.994302
acyp2	ENSDARG00000086271	101886626	9.72438061813093	48.443840753698	8.67814182137655	18.4603952524552	7.7442915908798	13.467532070907	-0.752754	0.742052
ada	ENSDARG00000003113	436919	127.389386097515	124.016232329467	244.916446958849	250.672735533338	110.356155170037	101.006490531802	-0.10338	0.947009
ada2a	ENSDARG00000051746	373884	276.172409554918	220.903913836863	199.597261891661	270.104730535923	183.926925283395	307.829304477874	0.129088	0.900699
ada2b	ENSDARG00000015623	559295	25.2833896071404	45.5372103084761	29.8913773847414	0	13.5525102840396	17.3153983768804	-1.70567	0.388487
adad1	ENSDARG00000089181	564818	30.1455799162059	24.221920376849	17.3562836427531	41.7787892555564	0.968036448859975	10.5816323414269	-0.427708	0.882187
adad2	ENSDARG00000105626	558824	7.77950449450474	12.5953985959615	4.82118990076475	23.3183940031013	12.5844738351797	0	0.510709	0.890625
adal	ENSDARG00000012986	619263	57.3738456469725	53.2882248290678	86.7814182137654	100.07477426331	125.844738351797	28.8589972948006	0.367669	0.80791
adam10a	ENSDARG00000053468	566044	1517.97581449024	1925.15823155196	2027.79247226165	5020.25590891767	6122.83053903934	5293.70207044293	1.58707	8.22912e-06
adam10b	ENSDARG00000015502	393392	48.6219030906546	40.6928262331063	17.3562836427531	31.091192004135	13.5525102840396	28.8589972948006	-0.53717	0.754073
adam11	ENSDARG00000079204	567145	38.8975224725237	20.3464131165532	28.9271394045885	10.6875972514214	8.71232803973977	11.5435989179203	-1.51056	0.243914
adam12	ENSDARG00000079068	563275	109.885500984879	181.17996441883	165.848932586307	743.273808848852	809.278471246939	298.20963871294	2.01808	0.000744712
ADAM12oneOfMany	ENSDARG00000116062	101884222	9.72438061813093	19.3775363014792	3.8569519206118	18.4603952524552	3.8721457954399	0.961966576493355	-0.50105	0.887629
adam15	ENSDARG00000089213	795199	174.066413064544	168.584565822869	108.958891757283	581.988250327402	503.378953407187	325.144702854754	1.64309	0.00157609
adam17a	ENSDARG00000043213	324142	529.006305626323	551.290907777083	737.642054817006	1487.51921744783	1524.65740695446	751.29589624131	1.04974	0.0587206
adam17b	ENSDARG00000093093	560657	38.8975224725237	50.3815943838459	17.3562836427531	87.4439775116297	77.442915908798	28.8589972948006	0.861483	0.513801
adam19a	ENSDARG00000059693		240.192201267834	392.395110104954	372.195860339039	188.490351525068	203.287654260595	169.30611746283	-0.84063	0.139014
adam19b	ENSDARG00000067545	571252	211.991497475254	138.549384555576	216.953545534414	12.6307967516798	48.4018224429987	94.2727244963488	-1.86928	0.0456318
adam22	ENSDARG00000060532	100126805	534.840933997201	169.553442637943	624.826211139111	28.1763927537474	105.515972925737	190.469382145684	-2.0357	0.0305174
adam23a	ENSDARG00000062323	794175	633.057178240323	389.488479659732	953.631362371267	203.064347777007	177.150670141375	328.992569160727	-1.4784	0.015371
adam28	ENSDARG00000035514	767749	91.4091778104307	156.958044041981	80.9959903328478	15.5455960020675	74.538806562218	121.207788638163	-0.640297	0.668736
adam8a	ENSDARG00000001452	368917	255.751210256843	220.903913836863	73.2820864916242	701.495019593296	1003.85379746779	459.820023563824	1.97719	0.00377136
adam8b	ENSDARG00000057644	100005593	91.4091778104307	100.763188767692	22.1774735435178	273.99112953644	273.954315027373	218.366412863992	1.83807	0.0172662
adam9	ENSDARG00000010070	447940	71.9604165741689	73.6346379456209	22.1774735435178	172.944755523001	100.675790681437	130.827454403096	1.26956	0.152906
adamts1	ENSDARG00000103519	565145	42.7872747197761	24.221920376849	14.4635697022942	65.0971832586577	27.1050205680793	42.3265293657076	0.723662	0.625234
adamts10	ENSDARG00000075188	564734	32.0904560398321	19.3775363014792	24.1059495038237	22.346794252972	74.538806562218	17.3153983768804	0.595613	0.741198
adamts12	ENSDARG00000067549	100003937	182.818355620861	216.059529761493	143.671459042789	60.2391845080116	67.7625514201982	65.4137272015481	-1.48801	0.00712147
adamts13	ENSDARG00000076270	100320289	21.393637359888	15.5020290411834	25.0701874839767	0	17.4246560794795	7.69573261194684	-1.30247	0.604576
adamts14	ENSDARG00000078494	101886422	14.5865709271964	26.1596740069969	4.82118990076475	7.77279800103375	9.68036448859975	0	-1.38485	0.630121
adamts15a	ENSDARG00000029124	569571	123.499633850263	169.553442637943	128.243651360342	27.2047930036181	36.785385056679	12.5055654944136	-2.46164	0.000510237
adamts15b	ENSDARG00000058252	100001991	116.692567417571	100.763188767692	142.707221062637	57.3243852576239	65.8264785224783	16.353431800387	-1.36853	0.133252
adamts16	ENSDARG00000074646	568792	35.9802082870844	14.5331522261094	12.5350937419883	46.6367880062025	15.4885831817596	6.73376603545348	0.127091	0.96475
adamts17	ENSDARG00000075555	101884120	18.4763231744488	20.3464131165532	26.9986634442826	23.3183940031013	6.77625514201982	7.69573261194684	-0.800926	0.681284
adamts18	ENSDARG00000001999	100150128	517.337048884565	527.068987400234	375.088574279497	112.705571014989	90.0273897439776	172.192017192311	-1.92061	0.000135122
adamts2	ENSDARG00000075930	571682	151.700337642842	225.748297912233	103.173463876366	54.4095860072363	33.8812757100991	103.892390261282	-1.32227	0.121652
adamts3	ENSDARG00000060127	102467218	35.0077702252713	40.6928262331063	20.2489975832119	1.94319950025844	18.3926925283395	23.0871978358405	-1.14344	0.535269
adamts5	ENSDARG00000100307	565053	47.6494650288415	31.0040580823667	30.8556153648944	21.3751945028428	51.3059317895787	20.2012981063605	-0.237549	0.89818
adamts6	ENSDARG00000041982	569099	24.3109515453273	55.2259784592157	22.1774735435178	12.6307967516798	30.0091299146592	14.4294986474003	-0.833728	0.604717
ADAMTS7	ENSDARG00000102478	560364	43.7597127815892	60.0703625345855	31.8198533450473	114.648770515248	109.388118721177	58.6799611660946	1.05946	0.232359
adamts8a	ENSDARG00000007709	569618	41.814836657963	27.1285508220709	10.6066177816824	0	41.6255673009789	1.92393315298671	-0.869176	0.790351
adamts9	ENSDARG00000077778	100333407	366.609149303536	444.714458118947	339.411769013838	414.873093305176	636.967983349863	360.737466185008	0.29577	0.72053
adamtsl2	ENSDARG00000074033	100537087	462.880517423032	1077.39101836224	93.5310840748361	38.8639900051688	70.6666607667781	75.0333929664817	-3.14597	0.000657433
adamtsl3	ENSDARG00000027903	100534944	128.361824159328	195.71311664494	88.7098941740714	108.819172014473	30.9771663635192	33.6688301772674	-1.25088	0.215258
adamtsl5	ENSDARG00000052118	101886605	50.5667792142808	73.6346379456209	121.493985499272	36.9207905049103	28.0730570169393	49.0602954011611	-1.10715	0.244677
adamtsl7	ENSDARG00000055439	556634	38.8975224725237	48.443840753698	26.9986634442826	40.8071895054272	22.2648383237794	26.9350641418139	-0.345256	0.829703
adap2	ENSDARG00000070565	100331455	24.3109515453273	45.5372103084761	29.8913773847414	198.206349026361	243.945185112714	262.616875382686	2.82089	2.77019e-07
adar	ENSDARG00000012389	58119	194.487612362619	145.331522261094	143.671459042789	77.7279800103375	124.876701902937	168.344150886337	-0.382155	0.70161
adarb1a	ENSDARG00000041609	58134	346.187950005461	356.546667947217	504.296463619993	1864.49992049797	1339.7624452222	1084.13633170801	1.82895	4.03841e-05
adarb1b	ENSDARG00000003544	558759	57.3738456469725	31.9729348974407	34.7125672855062	14.5739962519383	44.5296766475588	36.5547299067475	-0.37488	0.825712
adarb2	ENSDARG00000071823	558149	45.7045889052154	26.1596740069969	10.6066177816824	28.1763927537474	27.1050205680793	24.0491644123339	-0.0558355	0.983071
adat1	ENSDARG00000061348	792614	60.2911598324118	57.1637320893636	46.2834230473416	20.4035947527136	32.9132392612391	75.995359542975	-0.340281	0.834691
adat2	ENSDARG00000041944	100034610	88.4918636249915	109.483080103357	91.6026081145302	95.2167755126635	67.7625514201982	72.1474932370016	-0.300562	0.772408
adat3	ENSDARG00000005640	368634	38.8975224725237	47.474963938624	89.6741321542243	90.3587767620174	46.4657495452788	23.0871978358405	-0.138921	0.944494
adck1	ENSDARG00000062561	100144553	44.7321508434023	38.7550726029584	19.284759603059	42.7503890056856	39.689494403259	13.467532070907	-0.0997966	0.964524
adck2	ENSDARG00000073923	572087	81.6847971922998	47.474963938624	22.1774735435178	19.4319950025844	37.753421505539	22.1252312593472	-0.932059	0.494785
adck5	ENSDARG00000075405	100001584	80.7123591304867	148.238152706316	127.279413380189	61.2107842581408	103.579900028017	104.854356837776	-0.401716	0.707375
adcy1a	ENSDARG00000069026	557026	42.7872747197761	22.2841667467011	37.605281225965	33.0343915043934	3.8721457954399	10.5816323414269	-1.11274	0.529534
adcy1b	ENSDARG00000088634	569499	35.9802082870844	26.1596740069969	9.6423798015295	21.3751945028428	1.93607289771995	0.961966576493355	-1.56475	0.510039
adcy2a	ENSDARG00000058392	563724	66.1257882032903	31.9729348974407	41.4622331465768	0	21.2968018749194	37.5166964832408	-1.24639	0.56401
adcy2b	ENSDARG00000014588	557902	176.983727249983	128.860616404837	243.952208978696	5077.5802941753	3325.20520183401	2059.57044027227	4.25013	1.82157e-15
adcy3a	ENSDARG00000077145	571825	29.1731418543928	26.1596740069969	16.3920456626001	6.80119825090453	18.3926925283395	12.5055654944136	-0.927729	0.588299
adcy3b	ENSDARG00000017437	564719	29.1731418543928	7.75101452059168	17.3562836427531	1.94319950025844	3.8721457954399	0.961966576493355	-3.00206	0.107682
adcy5	ENSDARG00000091342	562619	69.0431023887296	43.5994566783282	57.854278809177	45.6651882560733	21.2968018749194	20.2012981063605	-0.96814	0.392236
adcy6a	ENSDARG00000061445	570652	206.156869104376	155.020290411834	184.169454209213	597.53384632947	645.680311389603	325.144702854754	1.524	0.00344555
adcy6b	ENSDARG00000027797	560807	43.7597127815892	55.2259784592157	27.9629014244355	16.5171957521967	21.2968018749194	20.2012981063605	-1.12962	0.323462
adcy7	ENSDARG00000060070	568726	441.486880063144	420.492537742098	458.977278552804	649.028633086318	1092.91315076291	593.5333776964	0.822126	0.137291
adcy8	ENSDARG00000031783	100148976	128.361824159328	36.8173189728105	123.422461459578	0	36.785385056679	78.8812592724551	-1.31896	0.525543
adcy9	ENSDARG00000100869	100333702	50.5667792142808	45.5372103084761	49.1761369878004	127.279567266928	75.506843011078	53.8701282836279	0.820902	0.397959
adcyap1a	ENSDARG00000004015	259257	46.6770269670285	40.6928262331063	157.170790764931	60.2391845080116	13.5525102840396	67.3376603545348	-0.793095	0.617891
adcyap1b	ENSDARG00000027740	335625	1128.02815170319	768.31931435365	2610.19221227403	173.91635527313	369.78992346451	293.399805830473	-2.42853	0.000169737
adcyap1r1a	ENSDARG00000053724	555473	898.532769115298	439.870074043578	1745.27074407684	123.393168266411	125.844738351797	126.979588097123	-3.03502	8.56072e-07
add1	ENSDARG00000103962	555511	278.117285678545	261.596740069969	152.349600864166	167.115157022226	363.98170477135	478.097388517197	0.544291	0.574129
add2	ENSDARG00000074581	570147	571.793580346099	206.370761610753	503.33222563984	40.8071895054272	85.1872074996778	194.317248451658	-2.00016	0.015769
add3a	ENSDARG00000040874	556762	1171.78786448478	1999.76174631265	1649.8111840417	2858.44646488016	2889.58879984702	2154.80513134511	0.712925	0.175664
add3b	ENSDARG00000056250	553243	35.9802082870844	69.7591306853251	128.243651360342	15.5455960020675	23.2328747726394	5.77179945896013	-2.39325	0.0243473
adgb	ENSDARG00000005595	555435	143.920833148338	73.6346379456209	121.493985499272	47.6083877563317	20.3287654260595	29.820963871294	-1.79432	0.0216111
adgra1a	ENSDARG00000054177	560847	254.77877219503	145.331522261094	208.275403713037	131.165966267445	68.7305878690582	373.243031679422	-0.0860276	0.962238
adgra2	ENSDARG00000076994	560700	95.2989300576831	152.113659966612	63.6397066900947	314.798319041867	389.15065244171	161.610384850884	1.47649	0.0381956
adgra3	ENSDARG00000073673		288.814104358489	379.799711508992	316.270057490167	234.155539781142	291.378971106852	363.623365914488	-0.147482	0.873548
adgrb1a	ENSDARG00000075133	563527	809.068467428493	301.320689488001	871.671134058266	289.536725538507	372.69403281109	503.108519506025	-0.766232	0.343453
adgrb1b	ENSDARG00000078529	100302472	546.510190738958	389.488479659732	997.986309458303	108.819172014473	232.328747726394	268.388674841646	-1.66576	0.0124721
adgrb2	ENSDARG00000025667		114.747691293945	66.8525002401032	20.2489975832119	6.80119825090453	16.4566196306196	34.6307967537608	-1.80151	0.173624
adgrb3	ENSDARG00000059832	566117	237.274887082395	74.6035147606949	210.203879673343	45.6651882560733	50.3378953407187	51.9461951306412	-1.81914	0.0137857
adgrd1	ENSDARG00000053344		60.2911598324118	48.443840753698	32.7840913252003	0	32.9132392612391	15.3914652238937	-1.55061	0.433274
adgrd2	ENSDARG00000103067	571770	21.393637359888	15.5020290411834	20.2489975832119	47.6083877563317	4.84018224429987	3.84786630597342	-0.0218666	0.995039
adgre10	ENSDARG00000075855	569655	881.028884002662	5377.26632366048	3231.16147149253	17126.3887955277	484.986260878847	4911.80133957507	1.24702	0.644503
adgre14	ENSDARG00000056062	108182849	14.5865709271964	4.8443840753698	3.8569519206118	0	0	9.61966576493355	-1.27458	0.780953
adgre15	ENSDARG00000096588	100536619	16.5314470508226	19.3775363014792	8.67814182137655	0	0	0	-6.38434	0.0138522
adgre17	ENSDARG00000095297		21.393637359888	22.2841667467011	20.2489975832119	20.4035947527136	0	3.84786630597342	-1.39875	0.588619
adgre18	ENSDARG00000096644		1.94487612362619	2.90663044522188	1.9284759603059	0	0	6.73376603545348	-0.00914675	1
adgre19	ENSDARG00000096649		3.88975224725237	0	8.67814182137655	0	0	0	-4.55755	1
adgre5a	ENSDARG00000026313		10.696818679944	2.90663044522188	0	0	5.80821869315985	1.92393315298671	-0.814641	1
adgre5b.2	ENSDARG00000104083	101882660	36.9526463488975	10.6576449658136	8.67814182137655	8.74439775116297	24.2009112214994	4.80983288246677	-0.576097	0.823084
adgre5b.3	ENSDARG00000112943	100536657	78.7674830068605	130.798370034985	108.958891757283	96.1883752627927	108.420082272317	61.5658608955747	-0.259129	0.824445
adgre6	ENSDARG00000095494		10.696818679944	0.96887681507396	8.67814182137655	10.6875972514214	0	0	-0.929179	0.858648
adgre7	ENSDARG00000041399		3.88975224725237	0	0	43.7219887558149	7.7442915908798	0	3.72702	0.313387
adgre8	ENSDARG00000079050		11.6692567417571	4.8443840753698	0.964237980152949	0	0.968036448859975	1.92393315298671	-2.59378	1
adgre9	ENSDARG00000096577	101883848	26.2558276689535	17.4397826713313	6.74966586107065	0	1.93607289771995	1.92393315298671	-3.70658	0.0805811
adgrf3a	ENSDARG00000087870	101886922	33.0628941016452	35.8484421577365	35.6768052656591	0.971599750129219	9.68036448859975	11.5435989179203	-2.23578	0.117972
adgrf3b	ENSDARG00000093008	565465	138.086204777459	41.6617030481803	53.9973268885652	6.80119825090453	60.9862962781784	11.5435989179203	-1.55895	0.290909
adgrf6	ENSDARG00000091757		55.4289695233463	62.9769929798074	99.3165119557538	27.2047930036181	115.196337414337	81.7671590019352	0.0420978	0.984268
adgrf7	ENSDARG00000086445		15.5590089890095	9.6887681507396	2.89271394045885	10.6875972514214	4.84018224429987	7.69573261194684	-0.276866	0.935536
adgrf8	ENSDARG00000093316	100537224	42.7872747197761	60.0703625345855	53.9973268885652	0	50.3378953407187	22.1252312593472	-1.11405	0.614037
adgrg1	ENSDARG00000105643	324948	559.151885542528	540.633262811269	656.646064484159	682.063024590712	622.447436616964	905.210548480247	0.331224	0.62103
adgrg11	ENSDARG00000041413	563883	30.1455799162059	9.6887681507396	24.1059495038237	0	11.6164373863197	0	-2.4607	0.380699
adgrg2a	ENSDARG00000088137	101882832	38.8975224725237	52.3193480139938	57.854278809177	8.74439775116297	24.2009112214994	31.7448970242807	-1.20413	0.316826
adgrg3	ENSDARG00000074782	799479	82.6572352541129	273.223261850857	92.5668460946832	64.1255835085285	81.3150617042379	292.43783925398	-0.0343295	0.98861
adgrg4a	ENSDARG00000105416	793963	26.2558276689535	10.6576449658136	17.3562836427531	68.0119825090453	18.3926925283395	1.92393315298671	0.702594	0.783391
adgrg4b	ENSDARG00000094386		22.3660754217011	9.6887681507396	1.9284759603059	7.77279800103375	2.90410934657992	0.961966576493355	-1.54629	0.597506
adgrg6	ENSDARG00000054137	561970	586.380151273295	728.595364935618	435.835567029133	664.574229088386	327.196319714671	391.520396632795	-0.339931	0.704772
adgrg7.2	ENSDARG00000071085		8.75194255631784	0	0	7.77279800103375	2.90410934657992	0	0.286924	1
adgrl1a	ENSDARG00000089292	562531	163.3695943846	62.0081161647334	58.8185167893299	123.393168266411	119.068483209777	151.028752509457	0.469563	0.686558
adgrl2a	ENSDARG00000069356	57987	2104.35596576353	1990.07297816191	1864.8362536158	217.638344028945	440.456584231288	533.891449953812	-2.32173	1.44915e-06
adgrl2b.1	ENSDARG00000111712	110437953	8.75194255631784	12.5953985959615	7.7139038412236	13.6023965018091	0.968036448859975	0	-0.996663	0.792902
ADGRL3	ENSDARG00000090624		496.91584958649	430.181305892838	526.47393716351	219.581543529203	440.456584231288	282.818173489046	-0.624487	0.350154
adgrl3.1	ENSDARG00000061121	560631	1033.70165970732	482.500653906832	489.832893917698	865.695377365134	702.794461872342	1917.19938695126	0.797122	0.349179
adgrl4	ENSDARG00000013653	406676	26.2558276689535	22.2841667467011	51.1046129481063	4084.60534954324	4807.26900503863	2813.75223624306	6.87587	1.20041e-34
adgrv1	ENSDARG00000021137	415105	1021.05996490375	974.690075964403	811.888379288783	136.99556476822	194.575326220855	327.068636007741	-2.09172	3.35063e-05
adh5	ENSDARG00000080010	116517	1484.91292038859	2577.21232809673	2219.67583031209	4849.25435289493	3818.9037907526	3234.13163017066	0.921984	0.0657728
adh8a	ENSDARG00000091211	322482	19.4487612362619	27.1285508220709	40.4979951664239	5.82959850077531	10.6484009374597	3.84786630597342	-2.09927	0.123298
adh8b	ENSDARG00000024278	402841	144.893271210151	178.273333973609	346.161434874909	280.792327787344	276.858424373953	262.616875382686	0.293321	0.772189
adhfe1	ENSDARG00000053518	404618	108.913062923066	110.451956918431	77.139038412236	31.091192004135	83.2511346019578	40.4025962127209	-0.938125	0.330018
adi1	ENSDARG00000020448	324079	360.774520932657	474.74963938624	690.394393789512	412.929893804918	963.196266615675	519.461951306412	0.312952	0.758352
adipoqb	ENSDARG00000100086	751715	6.80706643269165	2.90663044522188	3.8569519206118	10.6875972514214	2.90410934657992	1.92393315298671	0.192961	0.96615
adipor1a	ENSDARG00000002912	436740	1165.9532361139	702.435690928621	836.95856677276	1173.6924981561	869.296731076257	711.855266605083	0.0261526	0.983083
adipor1b	ENSDARG00000042717	406821	353.967454499966	256.752355994599	435.835567029133	403.213896303626	303.963444942032	421.341360504089	0.108773	0.914791
adipor2	ENSDARG00000101849	560140	1719.27049328555	2434.78743628086	1643.06151818063	7555.15965700481	8575.83490045051	3951.7586962347	1.79255	0.000230853
adka	ENSDARG00000039429	368220	427.872747197761	628.801052983	494.654083818463	596.56224657934	520.803609486666	796.508325336498	0.303003	0.689387
adkb	ENSDARG00000095947	322229	211.019059413441	276.129892296078	386.659430041333	244.843137032563	215.872128095774	326.106669431247	-0.151287	0.885354
adm2a	ENSDARG00000045708	403114	28.2007037925797	26.1596740069969	8.67814182137655	0	10.6484009374597	8.65769918844019	-1.70674	0.465766
adm2b	ENSDARG00000078875	100322075	10.696818679944	5.81326089044376	0	0	4.84018224429987	0.961966576493355	-1.50844	1
adma	ENSDARG00000015263	556502	70.9879785123558	110.451956918431	157.170790764931	997.832943382708	1943.81718931083	667.604804086388	3.41392	1.97617e-08
admb	ENSDARG00000069027	570100	109.885500984879	199.588623905236	219.846259474872	15.5455960020675	53.2420046872986	56.7560280131079	-2.07579	0.00940836
admp	ENSDARG00000025372	140619	25.2833896071404	20.3464131165532	0	13.6023965018091	21.2968018749194	10.5816323414269	-0.00456754	0.999827
adnp2a	ENSDARG00000060937	100007394	254.77877219503	220.903913836863	283.485966164967	411.958294054789	305.899517839752	315.52503708982	0.444853	0.5002
adnp2b	ENSDARG00000028431	564171	888.808388497167	1081.26652562254	913.133367204843	836.547384861257	1149.05926479679	1134.15859368567	0.113771	0.889596
adnpa	ENSDARG00000062002	564637	1053.15042094358	1058.01348206076	1331.61265059122	984.230546880899	850.904038547918	1689.21330832233	0.0337931	0.977191
adnpb	ENSDARG00000074293	100330315	694.320776134548	535.7888787359	797.424809586489	279.820728037215	377.53421505539	556.016681213159	-0.740673	0.236556
adoa	ENSDARG00000042827	494091	290.758980482115	212.184022501197	197.668785931355	80.6427792607252	302.027372044312	253.959176194246	-0.138107	0.924965
adob	ENSDARG00000053571	406474	179.901041435422	190.86873256957	134.993317221413	86.4723777615005	143.269394431276	193.355281875164	-0.257371	0.81488
adora1a	ENSDARG00000070056	100007535	10.696818679944	10.6576449658136	3.8569519206118	0	0	0.961966576493355	-4.59995	0.161633
adora1b	ENSDARG00000075694	100150997	27.2282657307666	5.81326089044376	9.6423798015295	13.6023965018091	12.5844738351797	7.69573261194684	-0.333082	0.903948
adora2aa	ENSDARG00000033706	561701	93.3540539340569	60.0703625345855	71.3536105313183	545.067459822492	304.931481390892	210.670680252045	2.23841	0.000206743
adora2ab	ENSDARG00000058488	566118	17.5038851126357	4.8443840753698	27.9629014244355	50.5231870067194	2.90410934657992	0	0.0864326	0.986229
adora2b	ENSDARG00000002533	560100	35.9802082870844	20.3464131165532	18.320521622906	19.4319950025844	12.5844738351797	15.3914652238937	-0.654899	0.704901
adpgk	ENSDARG00000063525	557919	82.6572352541129	64.9147466099553	34.7125672855062	27.2047930036181	12.5844738351797	30.7829304477874	-1.36886	0.201257
adpgk2	ENSDARG00000062785	566398	50.5667792142808	38.7550726029584	22.1774735435178	49.5515872565902	46.4657495452788	15.3914652238937	-0.00122375	0.999827
adprh	ENSDARG00000040712	445059	70.9879785123558	71.696884315473	119.565509538966	38.8639900051688	66.7945149713382	75.0333929664817	-0.537372	0.625069
adprhl1	ENSDARG00000041589	450012	9.72438061813093	7.75101452059168	9.6423798015295	0	6.77625514201982	4.80983288246677	-1.22647	0.710107
adprhl2	ENSDARG00000019338	796446	291.731418543928	264.503370515191	333.626341132921	77.7279800103375	91.9634626416976	146.21891962699	-1.49396	0.00606627
adprm	ENSDARG00000026090	393393	39.8699605343368	26.1596740069969	26.0344254641296	14.5739962519383	64.8584420736183	38.4786630597342	0.357121	0.84694
adra1aa	ENSDARG00000028725	798498	57.3738456469725	41.6617030481803	38.569519206118	97.1599750129219	211.999982300334	118.321888908683	1.63542	0.0209048
adra1ab	ENSDARG00000027638	557259	51.5392172760939	53.2882248290678	58.8185167893299	6.80119825090453	0	4.80983288246677	-3.81722	0.00177148
adra1ba	ENSDARG00000011317	100149100	31.118017978019	20.3464131165532	3.8569519206118	16.5171957521967	6.77625514201982	5.77179945896013	-0.928625	0.695769
adra1bb	ENSDARG00000041173	492486	59.3187217705987	55.2259784592157	82.9244662931537	44.6935885059441	23.2328747726394	20.2012981063605	-1.16422	0.237965
adra1d	ENSDARG00000024101	568614	124.472071912076	145.331522261094	223.703211395484	1468.08722244525	1448.18252749452	679.148403004309	2.86495	5.78841e-08
adra2a	ENSDARG00000040841	266750	18.4763231744488	27.1285508220709	8.67814182137655	30.1195922540058	13.5525102840396	23.0871978358405	0.298551	0.893291
adra2b	ENSDARG00000102096	266751	23.3385134835142	17.4397826713313	9.6423798015295	34.0059912545227	22.2648383237794	4.80983288246677	0.276598	0.916745
adra2c	ENSDARG00000069669	266752	34.0353321634582	10.6576449658136	26.9986634442826	65.0971832586577	7.7442915908798	1.92393315298671	0.0603614	0.988236
adra2da	ENSDARG00000091277	266754	49.5943411524677	50.3815943838459	38.569519206118	27.2047930036181	83.2511346019578	62.5278274720681	0.320387	0.833117
adra2db	ENSDARG00000054667	266755	18.4763231744488	9.6887681507396	6.74966586107065	46.6367880062025	2.90410934657992	11.5435989179203	0.80696	0.75633
adrb1	ENSDARG00000007490	557194	27.2282657307666	19.3775363014792	8.67814182137655	55.3811857573655	23.2328747726394	15.3914652238937	0.765914	0.675782
adrb2a	ENSDARG00000088124	565838	100.161120366749	93.0121742471001	143.671459042789	183.632352774422	142.301357982416	122.169755214656	0.411652	0.65042
adrb2b	ENSDARG00000054510	100037315	41.814836657963	31.9729348974407	14.4635697022942	39.835589755298	40.6575308521189	6.73376603545348	-0.016908	0.995243
adrb3a	ENSDARG00000053646	558248	201.29467879531	225.748297912233	337.483293053532	413.901493555047	569.205431929665	427.11315996305	0.883242	0.115358
adrb3b	ENSDARG00000052919	792519	25.2833896071404	38.7550726029584	15.4278076824472	19.4319950025844	12.5844738351797	10.5816323414269	-0.899673	0.584069
adrm1	ENSDARG00000058560	796450	576.655770655164	823.545292812866	1100.19553535452	1363.15444943129	1601.1322864144	1419.86266690419	0.810125	0.123684
adsl	ENSDARG00000017049	334431	150.727899581029	318.760472159333	266.129682522214	707.324618094071	621.479400168104	550.244881754199	1.35294	0.00986288
adss	ENSDARG00000002071	550502	10.696818679944	31.0040580823667	15.4278076824472	0	12.5844738351797	0	-2.18272	0.469842
adssl	ENSDARG00000012399	192305	754.61193596696	1403.90250504217	1478.17682357447	1089.16331989485	1627.26927053362	1911.4275874923	0.347718	0.682259
adssl1	ENSDARG00000099517	407989	35.9802082870844	33.9106885275886	30.8556153648944	24.2899937532305	40.6575308521189	42.3265293657076	0.0907086	0.96182
adtrp1	ENSDARG00000037810	550414	146.838147333777	268.378877775487	198.633023911508	197.234749276231	241.041075766134	257.807042500219	0.181377	0.856627
aebp1	ENSDARG00000091726	793308	280.062161802171	503.815943838459	205.382689772578	109.790771764602	125.844738351797	54.8320948601212	-1.76804	0.00928075
aebp2	ENSDARG00000006038	406815	562.069199727968	436.963443598356	628.683163059723	617.937441082183	724.091263747261	775.345060653644	0.37943	0.551425
aep1	ENSDARG00000039099	503710	54.4565314615332	22.2841667467011	70.3893725511653	92.3019762622758	194.575326220855	455.010190681357	2.33411	0.00881777
aes	ENSDARG00000021805	393395	101.133558428562	119.171848254097	105.101939836671	73.8415810098206	131.652957044957	125.055654944136	0.0226783	0.988414
afap1	ENSDARG00000055284	568356	154.617651828282	74.6035147606949	76.174800432083	203.064347777007	328.164356163531	71.1855266605083	0.980093	0.349995
afap1l1a	ENSDARG00000089162	566757	137.113766715646	171.491196268091	256.487302720685	387.668300301558	423.031928151809	214.518546558018	0.859301	0.223975
afap1l1b	ENSDARG00000056453	768144	71.9604165741689	109.483080103357	88.7098941740714	4749.17957863162	5446.17306128622	2475.1400013174	5.55152	2.5475e-27
afap1l2	ENSDARG00000074806	567369	227.550506464264	280.005399556374	283.485966164967	247.757936282951	318.483991674932	226.062145475938	0.00227197	0.999827
afdna	ENSDARG00000029472	558359	711.824661247184	827.420800073161	602.648737595593	3400.59912545227	3761.78964026986	2279.86078628925	2.14025	1.24101e-07
aff2	ENSDARG00000052242	100330019	1068.70942993259	685.964785072363	1025.94921088274	259.417133284501	322.356137470372	451.162324375383	-1.42862	0.00335503
aff3	ENSDARG00000079575	570215	175.038851126357	142.424891815872	91.6026081145302	136.99556476822	151.013686022156	140.44712016803	0.0668803	0.959261
aff4	ENSDARG00000001857	556421	212.963935537067	276.129892296078	114.744319638201	601.420245329987	464.657495452788	265.502775112166	1.14091	0.105532
afg1la	ENSDARG00000011466	561238	110.857939046693	104.638696027988	130.172127320648	78.6995797604667	91.9634626416976	111.588122873229	-0.292369	0.765653
afg1lb	ENSDARG00000042902	555926	84.6021113777391	116.265217808875	120.529747519119	263.303532285018	116.164373863197	89.462891613882	0.544915	0.615194
afg3l2	ENSDARG00000062272	569168	300.483361100246	397.239494180323	377.981288219956	307.997120790962	364.94974122021	380.938764291368	-0.0295602	0.977854
afmid	ENSDARG00000099106	550372	162.397156322787	178.273333973609	225.63168735579	156.427559770804	222.648383237794	286.66603979502	0.233412	0.811986
afp4	ENSDARG00000095863	568707	43.7597127815892	53.2882248290678	329.769389212309	4.85799875064609	90.0273897439776	257.807042500219	-0.275185	0.922048
aftpha	ENSDARG00000069249	556043	99.1886823049355	24.221920376849	11.5708557618354	71.8983815095622	21.2968018749194	60.6038943190814	0.188433	0.939003
aftphb	ENSDARG00000071347	100004990	47.6494650288415	14.5331522261094	0	21.3751945028428	27.1050205680793	10.5816323414269	-0.0741628	0.986336
aga	ENSDARG00000004889	566517	200.322240733497	313.916088083963	354.839576696285	368.236305298974	282.666643067113	399.216129244742	0.272972	0.757232
agap1	ENSDARG00000062123	100148154	1277.7836132224	714.062212709508	829.244662931537	1349.55205292949	1181.97250405803	1720.95820534661	0.592068	0.341262
agap2	ENSDARG00000099874	565109	198.377364609871	147.269275891242	564.079218389475	446.935885059441	340.748829998711	868.655818573499	0.864477	0.393061
agap3	ENSDARG00000087822	324332	118.637443541197	83.3234060963605	88.7098941740714	30.1195922540058	16.4566196306196	57.7179945896013	-1.47848	0.101783
AGBL1	ENSDARG00000104384	100536841	51.5392172760939	31.0040580823667	47.2476610274945	0	24.2009112214994	3.84786630597342	-2.21017	0.241816
agbl2	ENSDARG00000079983	568152	26.2558276689535	31.9729348974407	40.4979951664239	14.5739962519383	24.2009112214994	17.3153983768804	-0.815738	0.557005
agbl4	ENSDARG00000068050	550450	43.7597127815892	26.1596740069969	38.569519206118	26.2331932534889	28.0730570169393	13.467532070907	-0.678905	0.641773
agbl5	ENSDARG00000045900	445479	183.790793682675	140.487138185724	161.027742685543	137.967164518349	296.219153351152	214.518546558018	0.4187	0.642968
agfg1a	ENSDARG00000030020	327597	423.982994950508	512.535835174125	388.587906001639	822.944988359448	803.470252553779	1200.53428746371	1.09316	0.017148
agfg1b	ENSDARG00000019526	393560	352.995016438153	434.056813153134	654.717588523853	505.231870067194	878.977095564857	613.73467580276	0.470656	0.543464
aggf1	ENSDARG00000060109	559905	274.227533431292	337.169131645738	310.48462960925	616.965841332054	511.123244998067	405.949895280196	0.734653	0.163802
agk	ENSDARG00000009837	334270	161.424718260973	173.428949898239	179.348264308449	180.717553524035	216.840164544634	154.87661881543	0.103434	0.920393
agla	ENSDARG00000103811	567798	422.038118826882	404.021631885841	570.828884250546	216.666744278816	331.068465510111	291.475872677487	-0.735107	0.197392
aglb	ENSDARG00000100352	553352	44.7321508434023	31.9729348974407	10.6066177816824	6.80119825090453	12.5844738351797	10.5816323414269	-1.54252	0.311685
agmat	ENSDARG00000059700	556522	18.4763231744488	10.6576449658136	13.4993317221413	0	0	33.6688301772674	-0.340218	0.944634
agmo	ENSDARG00000025595	405819	257.69608638047	486.376161167128	574.685836171158	103.961173263826	130.684920596097	159.686451697897	-1.74166	0.00186416
ago1	ENSDARG00000092644	570775	32.0904560398321	40.6928262331063	16.3920456626001	3.88639900051688	33.8812757100991	43.288495942201	-0.137469	0.960509
ago2	ENSDARG00000061268	570630	29.1731418543928	38.7550726029584	17.3562836427531	1.94319950025844	53.2420046872986	32.7068636007741	0.0435857	0.99041
ago3a	ENSDARG00000059888	567622	157.534966013721	180.211087603756	74.2463244717771	235.127139531271	246.849294459294	190.469382145684	0.706845	0.380366
ago3b	ENSDARG00000063079	568159	102.105996490375	161.802428117351	30.8556153648944	47.6083877563317	157.789941164176	167.382184309844	0.338862	0.84183
ago4	ENSDARG00000100854	100535764	230.467820649703	218.966160206715	242.987970998543	312.855119541608	217.808200993494	300.133571865927	0.26284	0.743792
agpat2	ENSDARG00000101139	777624	437.597127815892	600.703625345855	713.536105313183	744.245408598982	568.237395480805	569.484213284066	0.103346	0.913213
agpat3	ENSDARG00000036549	406734	859.635246642774	681.120400996994	554.436838587946	369.207905049103	933.187136701015	751.29589624131	-0.0288419	0.984035
agpat4	ENSDARG00000069044	406265	243.109515453273	280.974276371448	350.982624775674	1000.7477426331	951.579829229355	429.99905969253	1.44487	0.0103382
agpat5	ENSDARG00000063187	767778	72.932854635982	83.3234060963605	53.9973268885652	107.847572264343	85.1872074996778	152.952685662443	0.718692	0.404685
agpat9l	ENSDARG00000006491	567414	20.4211992980749	14.5331522261094	61.7112307297888	9.71599750129219	74.538806562218	29.820963871294	0.238812	0.92495
agps	ENSDARG00000042821	386801	43.7597127815892	31.0040580823667	26.9986634442826	50.5231870067194	56.1461140338785	46.174395671681	0.586943	0.620626
agr1	ENSDARG00000060682	335309	57.3738456469725	135.642754110354	307.591915668791	99.1031745131803	223.616419686654	147.180886203483	-0.091379	0.961119
agr2	ENSDARG00000070480	335616	1152.33910324852	1428.12442541902	1612.20590281573	361.435107048069	697.954279628042	596.41927742588	-1.34032	0.00566338
agrn	ENSDARG00000079388	565373	2504.02800916871	2001.6994999428	3054.70592112454	2125.86025328273	2379.43359129782	2650.21791823919	-0.0794131	0.928316
agrp	ENSDARG00000069089	100149042	28.2007037925797	62.9769929798074	134.993317221413	14.5739962519383	6.77625514201982	3.84786630597342	-3.16671	0.00494586
agt	ENSDARG00000016412	322485	27.2282657307666	35.8484421577365	87.7456561939184	33.0343915043934	15.4885831817596	31.7448970242807	-0.910067	0.513529
agtpbp1	ENSDARG00000105214	554164	40.8423985961499	26.1596740069969	24.1059495038237	53.437986257107	34.8493121589591	23.0871978358405	0.289723	0.865923
agtr1a	ENSDARG00000018616	794575	20.4211992980749	5.81326089044376	2.89271394045885	0	15.4885831817596	0	-0.911101	0.846892
agtr1b	ENSDARG00000045443	100333455	17.5038851126357	19.3775363014792	8.67814182137655	153.512760520417	83.2511346019578	10.5816323414269	2.44075	0.0598389
agtr2	ENSDARG00000035552	503772	207.129307166189	422.430291372246	431.978615108521	1110.5385143977	1021.27845354727	684.920202463269	1.40783	0.010329
agtrap	ENSDARG00000077082	793937	34.0353321634582	57.1637320893636	48.2118990076475	42.7503890056856	138.429212186976	87.5389584608953	0.946745	0.370145
agxt2	ENSDARG00000100709	619269	52.511655337907	64.9147466099553	69.4251345710124	0	19.3607289771995	38.4786630597342	-1.69147	0.345235
agxta	ENSDARG00000052099	436603	14.5865709271964	10.6576449658136	61.7112307297888	30.1195922540058	6.77625514201982	104.854356837776	0.70497	0.762395
agxtb	ENSDARG00000018478	79378	58.3462837087856	95.918804692322	412.693855505462	57.3243852576239	75.506843011078	572.370113013546	0.314799	0.889952
ahctf1	ENSDARG00000077530	553494	828.517228664755	1062.85786613613	1007.62868925983	850.149781363067	715.378935707521	1221.69755214656	-0.0567175	0.956387
ahcy	ENSDARG00000005191	387530	1807.76235691054	3920.07559378924	2502.1975584969	5866.51929128022	4054.13664782557	6878.06102192749	1.02938	0.0704673
ahcyl1	ENSDARG00000056331	798918	661.257882032903	731.50199538084	1438.6430663882	312.855119541608	410.447454316629	819.595523172338	-0.875856	0.2693
ahcyl2	ENSDARG00000039343	394240	376.333529921667	394.332863735102	327.840913252003	313.826719291738	326.228283265811	403.063995550716	-0.0746083	0.937279
ahdc1	ENSDARG00000093453	100536210	336.46356938733	322.635979419629	343.26872093445	65.0971832586577	52.2739682384386	55.7940614366146	-2.53324	5.7373e-09
ahi1	ENSDARG00000044056	562701	478.439526412042	612.330147126742	405.944189644392	1443.79722869202	1167.45195732513	650.289405709508	1.12375	0.0463929
ahnak	ENSDARG00000061764	559276	4231.07800694877	6479.84813921464	5558.83195558175	12363.6068203943	13961.0216654586	8987.65372417741	1.11798	0.0119058
ahr1a	ENSDARG00000020046	246224	22.3660754217011	7.75101452059168	0	0	0.968036448859975	0.961966576493355	-3.9625	0.28102
ahr1b	ENSDARG00000023537	554265	76.8226068832343	45.5372103084761	10.6066177816824	47.6083877563317	72.6027336644981	65.4137272015481	0.481518	0.77719
ahr2	ENSDARG00000021833	30517	1329.3228304985	1772.07569477027	1497.46158317753	6620.4806973805	6604.91269057161	3312.05092286662	1.84638	5.94894e-05
ahrra	ENSDARG00000099702	641291	18.4763231744488	2.90663044522188	7.7139038412236	5.82959850077531	1.93607289771995	13.467532070907	-0.454047	0.894867
ahrrb	ENSDARG00000052618	565319	42.7872747197761	27.1285508220709	5.7854278809177	5.82959850077531	0	13.467532070907	-1.97142	0.399467
ahsa1a	ENSDARG00000028664	565968	84.6021113777391	253.845725549377	77.139038412236	720.92701459588	110.356155170037	247.225410158792	1.3758	0.214275
ahsa1b	ENSDARG00000100317	321945	227.550506464264	1772.07569477027	260.344254641296	3599.77707422876	307.835590737472	3042.70028144848	1.62078	0.484615
ahsg1	ENSDARG00000026764	569558	10.696818679944	4.8443840753698	4.82118990076475	0	2.90410934657992	2.88589972948006	-1.81344	0.607217
ahsg2	ENSDARG00000069293	567406	4.86219030906546	14.5331522261094	11.5708557618354	10.6875972514214	11.6164373863197	17.3153983768804	0.355492	0.892332
aicda	ENSDARG00000015734	493784	4.86219030906546	7.75101452059168	0	16.5171957521967	9.68036448859975	2.88589972948006	1.20539	0.729499
aida	ENSDARG00000014532	393763	135.16889059202	109.483080103357	144.635697022942	166.143557272096	168.438342101636	292.43783925398	0.687719	0.351623
aif1l	ENSDARG00000009336	321033	1068.70942993259	1046.38696027988	1573.63638360961	412.929893804918	522.739682384386	966.776409375822	-0.955248	0.128164
aifm1	ENSDARG00000058088	373125	673.899576836473	849.704966819863	720.285771174253	445.964285309311	607.926889884064	720.512965793523	-0.338647	0.62907
aifm2	ENSDARG00000077549	557507	273.255095369479	467.967501680722	387.623668021486	414.873093305176	602.118671190904	574.294046166533	0.495342	0.471636
aifm3	ENSDARG00000062780	100150876	29.1731418543928	7.75101452059168	3.8569519206118	32.0627917542642	5.80821869315985	4.80983288246677	0.0656663	0.987651
aifm4	ENSDARG00000061634	791218	176.01128918817	153.082536781686	310.48462960925	33.0343915043934	70.6666607667781	92.3487913433621	-1.70578	0.0196612
aifm5	ENSDARG00000075551	557064	14.5865709271964	0.96887681507396	5.7854278809177	0	0	0	-5.32128	1
aig1	ENSDARG00000007171	562261	246.999267700526	64.9147466099553	116.672795598507	12.6307967516798	40.6575308521189	154.87661881543	-1.04169	0.501149
aimp1	ENSDARG00000060036	562232	374.388653798041	684.027031442216	616.148069317735	718.983815095622	935.123209598735	944.651178116474	0.63403	0.297412
aimp2	ENSDARG00000018903	406647	181.845917559048	195.71311664494	269.022396462673	275.934329036698	316.547918777212	337.650268349168	0.524581	0.422161
aip	ENSDARG00000104437	334795	911.174463918868	1017.32065582766	952.667124391114	1393.2740416853	1686.31949391408	2144.22349900369	0.858461	0.0539562
aipl1	ENSDARG00000075067	100537095	71.9604165741689	53.2882248290678	23.1417115236708	49.5515872565902	18.3926925283395	16.353431800387	-0.815944	0.592034
aipl2	ENSDARG00000098164	100534741	90.4367397486176	53.2882248290678	13.4993317221413	44.6935885059441	26.1369841192193	16.353431800387	-0.850724	0.605262
aire	ENSDARG00000056784	100007662	8.75194255631784	12.5953985959615	7.7139038412236	3.88639900051688	18.3926925283395	1.92393315298671	-0.264021	0.941882
ajap1	ENSDARG00000038655	101887016	597.076969953239	427.274675447616	1034.62735270411	120.478369016023	131.652957044957	236.643777817365	-2.07463	0.000472977
ajuba	ENSDARG00000077842	572549	508.585106328248	738.284133086357	622.897735178805	1060.01532739098	938.995355394175	821.519456325325	0.593094	0.260766
ak1	ENSDARG00000001950	445486	453.156136804901	545.477646886639	1030.7704007835	2918.68564938817	2984.4563718353	1244.7847499824	1.81645	0.00278654
ak2	ENSDARG00000005926	321793	1178.59493091747	2837.84019135163	2331.52743600983	4136.10013630009	3415.23259157799	3633.3477594154	0.817154	0.174823
ak3	ENSDARG00000058226	406404	231.440258711516	327.480363494998	334.590579113073	652.915032086835	642.776202043023	357.851566455528	0.887962	0.132674
ak4	ENSDARG00000006546	406590	299.510923038433	259.658986439821	185.133692189366	328.400715543676	311.707736532912	264.540808535673	0.281488	0.734458
ak5	ENSDARG00000012555	100003595	119.60988160301	93.0121742471001	192.84759603059	41.7787892555564	33.8812757100991	38.4786630597342	-1.82887	0.00659889
ak5l	ENSDARG00000017739	548336	57.3738456469725	57.1637320893636	139.814507122178	34.0059912545227	23.2328747726394	49.0602954011611	-1.25867	0.208106
AK6	ENSDARG00000035573	415208	105.995748737627	327.480363494998	396.301809842862	282.735527287603	297.187189800012	386.710563750329	0.220219	0.863219
ak7a	ENSDARG00000019001	402854	75.8501688214212	33.9106885275886	46.2834230473416	18.4603952524552	30.9771663635192	23.0871978358405	-1.10531	0.319705
ak7b	ENSDARG00000017023	504040	40.8423985961499	17.4397826713313	20.2489975832119	27.2047930036181	4.84018224429987	10.5816323414269	-0.881667	0.654228
ak8	ENSDARG00000030961	553671	28.2007037925797	19.3775363014792	30.8556153648944	7.77279800103375	2.90410934657992	1.92393315298671	-2.63884	0.0717216
ak9	ENSDARG00000021913	557708	59.3187217705987	71.696884315473	62.6754687099417	46.6367880062025	35.8173486078191	24.0491644123339	-0.863037	0.384789
akap10	ENSDARG00000059549	566920	25.2833896071404	17.4397826713313	14.4635697022942	0	31.9452028123792	17.3153983768804	-0.215089	0.952805
akap11	ENSDARG00000075435	558595	470.660021917537	366.235436097957	603.612975575746	340.059912545227	398.83101693031	361.699432761501	-0.388311	0.579225
akap12a	ENSDARG00000091792	101885554	150.727899581029	99.7943119526178	74.2463244717771	273.99112953644	401.735126276889	74.0714263899883	1.2071	0.214275
akap12b	ENSDARG00000055678	567365	2658.645660997	3627.4747956369	2513.76841425874	28126.8411664908	27141.805953136	20198.412206631	3.10029	1.87742e-16
akap17a	ENSDARG00000104768	393655	200.322240733497	176.335580343461	142.707221062637	77.7279800103375	196.511399118575	207.784780522565	-0.107559	0.93867
akap1a	ENSDARG00000089802	100002545	21.393637359888	12.5953985959615	7.7139038412236	0.971599750129219	7.7442915908798	11.5435989179203	-1.04094	0.689156
akap1b	ENSDARG00000006062	556208	708.907347061745	747.004024422023	592.042119813911	404.185496053755	323.324173919231	688.768068769242	-0.532044	0.461983
akap6	ENSDARG00000077295	100002625	275.199971493105	166.646812192721	287.342918085579	75.7847805100791	86.1552439485377	177.963816651271	-1.10106	0.137484
akap7	ENSDARG00000043843		9.72438061813093	2.90663044522188	4.82118990076475	2.91479925038766	1.93607289771995	2.88589972948006	-1.17341	0.733847
akap8l	ENSDARG00000099635	406500	1593.82598331166	1837.9593181953	2057.68384964639	3718.31224374452	3655.30563089526	2030.71144297747	0.776651	0.149465
akap9	ENSDARG00000079610	565037	771.143383017783	737.315256271283	962.309504192644	606.278244080633	833.479382468438	943.689211539981	-0.0519023	0.959432
akip1	ENSDARG00000069037	562301	58.3462837087856	99.7943119526178	106.066177816824	234.155539781142	137.461175738116	125.055654944136	0.910511	0.245909
akirin1	ENSDARG00000039969	406432	854.773056333709	1202.37612750678	1321.00603280954	839.462184111645	1170.35606667171	1314.04634348992	-0.0233716	0.984245
akirin2	ENSDARG00000058729	406855	653.478377538398	851.64272045001	536.11631696504	722.870214096139	610.830999230644	1376.57417096199	0.409017	0.637295
akna	ENSDARG00000087110	556113	131.279138344768	150.175906336464	56.890040829024	31.091192004135	24.2009112214994	47.1363622481744	-1.72369	0.0376578
aknad1	ENSDARG00000094414		7.77950449450474	15.5020290411834	13.4993317221413	23.3183940031013	6.77625514201982	0	-0.289859	0.941939
akr1a1a	ENSDARG00000035257	445326	7.77950449450474	5.81326089044376	8.67814182137655	0.971599750129219	0	16.353431800387	-0.361758	0.940396
akr1a1b	ENSDARG00000052030	799805	271.310219245853	540.633262811269	685.573203888747	565.471054575205	757.97253945736	624.316308144187	0.379221	0.671419
akr1b1	ENSDARG00000006215	415138	123.499633850263	138.549384555576	216.953545534414	169.058356522484	45.4977130964188	112.550089449723	-0.550339	0.635083
akr7a3	ENSDARG00000016649	436642	253.806334133217	302.289566303075	395.337571862709	382.810301550912	352.365267385031	354.003700149555	0.195031	0.816835
akt1	ENSDARG00000099657		33.0628941016452	74.6035147606949	64.6039446702476	109.790771764602	90.9954261928376	39.4406296362275	0.479563	0.723804
akt1s1	ENSDARG00000074667	566559	920.898844536999	1028.94717760854	1071.26839594993	902.616167870044	829.607236672998	932.145612622061	-0.181289	0.788175
akt2	ENSDARG00000011219	378972	835.324295097447	1033.79156168391	680.752013987982	1446.71202794241	1473.35147516488	1476.6186949173	0.786	0.0822339
akt2l	ENSDARG00000103612	403146	150.727899581029	211.215145686123	321.091247390932	455.680282810604	643.744238491883	354.965666726048	1.09033	0.0828918
akt3a	ENSDARG00000104810	560549	135.16889059202	90.1055438018782	53.0330889084122	44.6935885059441	55.1780775850185	67.3376603545348	-0.734864	0.472465
akt3b	ENSDARG00000087205	100149794	98.2162442431224	47.474963938624	31.8198533450473	27.2047930036181	66.7945149713382	120.245822061669	0.271571	0.882031
aktip	ENSDARG00000026862	378716	570.821142284286	498.971559763089	515.867319381828	392.526299052204	504.346989856047	606.038943190813	-0.0772941	0.935878
AL590134.1	ENSDARG00000095161		13.6141328653833	15.5020290411834	9.6423798015295	0	3.8721457954399	2.88589972948006	-2.5191	0.291506
AL590145.1	ENSDARG00000095967		16.5314470508226	29.0663044522188	63.6397066900947	0	1.93607289771995	25.0111309888272	-2.0187	0.383291
AL590149.1	ENSDARG00000012581		590.269903520547	444.714458118947	644.11097074217	236.0987392814	428.840146844969	391.520396632795	-0.668427	0.292208
AL590150.1	ENSDARG00000092341		27.2282657307666	20.3464131165532	20.2489975832119	40.8071895054272	9.68036448859975	50.0222619776545	0.567596	0.759119
AL590151.1	ENSDARG00000053570	368435	29.1731418543928	24.221920376849	35.6768052656591	69.9551820093038	67.7625514201982	1.92393315298671	0.648555	0.775024
AL590151.2	ENSDARG00000105320	103908760	7.77950449450474	2.90663044522188	6.74966586107065	1.94319950025844	0	0	-3.16783	1
AL590152.1	ENSDARG00000110696		22.3660754217011	4.8443840753698	10.6066177816824	71.8983815095622	11.6164373863197	0	1.14294	0.707271
AL627088.1	ENSDARG00000095600		0.972438061813093	0	0	20.4035947527136	0	1.92393315298671	4.42264	1
AL627305.1	ENSDARG00000100324	572670	59.3187217705987	40.6928262331063	8.67814182137655	7.77279800103375	7.7442915908798	17.3153983768804	-1.72659	0.26207
AL645691.2	ENSDARG00000102716		10.696818679944	0	2.89271394045885	0	7.7442915908798	0	-0.811228	1
AL645792.2	ENSDARG00000103788	101883946	28.2007037925797	0.96887681507396	4.82118990076475	27.2047930036181	7.7442915908798	7.69573261194684	0.327335	0.92812
AL732488.1	ENSDARG00000096717	110438942	338.408445510956	384.644095584362	154.278076824472	199.17794877649	281.698606618253	710.893300028589	0.441969	0.719979
AL732515.1	ENSDARG00000095199		8.75194255631784	17.4397826713313	4.82118990076475	14.5739962519383	78.4109523576579	67.3376603545348	2.37026	0.0662623
AL732567.1	ENSDARG00000102957		9.72438061813093	7.75101452059168	80.0317523526948	26.2331932534889	63.8904056247583	19.2393315298671	0.165321	0.955007
AL772146.2	ENSDARG00000105823		21.393637359888	10.6576449658136	16.3920456626001	0.971599750129219	16.4566196306196	17.3153983768804	-0.479238	0.866359
AL772219.1	ENSDARG00000117701		19.4487612362619	7.75101452059168	8.67814182137655	0	2.90410934657992	3.84786630597342	-2.40865	0.351768
AL772241.1	ENSDARG00000110792		429.817623321387	253.845725549377	142.707221062637	89.3871770118881	178.118706590235	56.7560280131079	-1.34964	0.115085
AL772298.1	ENSDARG00000089005		48.6219030906546	5.81326089044376	35.6768052656591	36.9207905049103	50.3378953407187	0.961966576493355	-0.0306929	0.993566
AL772298.2	ENSDARG00000103719		6.80706643269165	5.81326089044376	0	0	0	4.80983288246677	-1.39066	1
AL772300.1	ENSDARG00000097343		23.3385134835142	22.2841667467011	35.6768052656591	50.5231870067194	36.785385056679	0	0.102699	0.977537
AL772300.2	ENSDARG00000117344		8.75194255631784	9.6887681507396	1.9284759603059	8.74439775116297	0	0.961966576493355	-1.06987	0.802836
AL772314.1	ENSDARG00000097492		132.251576406581	185.055471679126	543.830220806263	122.421568516282	86.1552439485377	224.138212322952	-0.992814	0.341493
AL772362.1	ENSDARG00000097552		11.6692567417571	5.81326089044376	0	57.3243852576239	6.77625514201982	0	1.8746	0.598331
AL772373.1	ENSDARG00000117427		64.1809120796641	5.81326089044376	11.5708557618354	68.9835822591745	3.8721457954399	14.4294986474003	0.0977912	0.978963
AL772382.1	ENSDARG00000097122		43.7597127815892	41.6617030481803	10.6066177816824	13.6023965018091	64.8584420736183	33.6688301772674	0.22381	0.92411
AL773558.1	ENSDARG00000098223		87.5194255631784	71.696884315473	85.8171802336125	204.035947527136	50.3378953407187	60.6038943190814	0.362178	0.807643
AL805905.1	ENSDARG00000117732		18.4763231744488	7.75101452059168	0	0	0	0	-5.61869	0.197392
AL807749.1	ENSDARG00000095989		22.3660754217011	22.2841667467011	0	0	4.84018224429987	0	-3.20566	0.40499
AL807792.1	ENSDARG00000096836		46.6770269670285	58.1326089044376	111.851605697742	49.5515872565902	30.9771663635192	17.3153983768804	-1.14717	0.30013
AL808129.1	ENSDARG00000097262		257.69608638047	117.234094623949	346.161434874909	73.8415810098206	60.0182598293184	352.079766996568	-0.569337	0.707615
AL831726.1	ENSDARG00000086880		4.86219030906546	4.8443840753698	14.4635697022942	0	0	2.88589972948006	-3.06388	0.399486
AL831726.2	ENSDARG00000104185	101882696	9.72438061813093	0	3.8569519206118	38.8639900051688	2.90410934657992	3.84786630597342	1.748	0.584055
AL831726.3	ENSDARG00000117226		4.86219030906546	5.81326089044376	13.4993317221413	0	3.8721457954399	0	-2.64269	0.480034
AL831745.1	ENSDARG00000039423	368914	37.9250844107106	22.2841667467011	74.2463244717771	31.091192004135	13.5525102840396	32.7068636007741	-0.797699	0.598259
AL831745.2	ENSDARG00000094022	110440182	6.80706643269165	12.5953985959615	20.2489975832119	18.4603952524552	0	6.73376603545348	-0.65461	0.849382
AL831768.1	ENSDARG00000100923	100534861	13.6141328653833	7.75101452059168	11.5708557618354	14.5739962519383	17.4246560794795	4.80983288246677	0.160187	0.95909
AL833789.1	ENSDARG00000096811		12.6416948035702	14.5331522261094	17.3562836427531	44.6935885059441	5.80821869315985	7.69573261194684	0.38583	0.88673
AL840638.1	ENSDARG00000098608		510.529982451874	662.711741510588	764.640718261289	433.333488557632	695.050170281462	671.452670392362	-0.106613	0.913219
AL844141.1	ENSDARG00000096964		51.5392172760939	22.2841667467011	25.0701874839767	0	23.2328747726394	15.3914652238937	-1.35613	0.544351
AL844186.1	ENSDARG00000114351		0.972438061813093	5.81326089044376	3.8569519206118	61.2107842581408	0	0	2.52365	0.499994
AL844192.1	ENSDARG00000100356		0	0	0	13.6023965018091	0	3.84786630597342	5.02891	1
AL844518.1	ENSDARG00000111211	100150820	13.6141328653833	12.5953985959615	9.6423798015295	58.2959850077531	34.8493121589591	8.65769918844019	1.50557	0.330194
AL845320.1	ENSDARG00000092847		11.6692567417571	4.8443840753698	6.74966586107065	1.94319950025844	0	0	-3.58412	0.304041
AL845320.2	ENSDARG00000114981		6.80706643269165	0	3.8569519206118	0	5.80821869315985	7.69573261194684	0.341011	1
AL845324.1	ENSDARG00000023609		176.983727249983	90.1055438018782	221.774735435178	0	75.506843011078	98.1205908023222	-1.49335	0.417982
AL845330.1	ENSDARG00000108467	796214	39.8699605343368	43.5994566783282	26.0344254641296	48.5799875064609	26.1369841192193	3.84786630597342	-0.479242	0.824304
AL845362.1	ENSDARG00000093205		22.3660754217011	20.3464131165532	53.9973268885652	0	11.6164373863197	0	-3.05773	0.182389
AL845365.1	ENSDARG00000096673		0	0.96887681507396	0	11.6591970015506	0	0	3.48524	1
AL845369.2	ENSDARG00000095523		8.75194255631784	15.5020290411834	0	0	5.80821869315985	1.92393315298671	-1.64904	0.710952
AL928650.1	ENSDARG00000079332	101883376	4.86219030906546	4.8443840753698	0	19.4319950025844	9.68036448859975	2.88589972948006	1.72127	0.582289
AL928650.2	ENSDARG00000096526		0	5.81326089044376	0	0	0	17.3153983768804	1.57488	1
AL928650.3	ENSDARG00000096599	103911855	42.7872747197761	55.2259784592157	18.320521622906	14.5739962519383	13.5525102840396	89.462891613882	0.0157616	0.995789
AL928650.4	ENSDARG00000113858		75.8501688214212	358.484421577365	53.9973268885652	145.739962519383	146.173503777856	212.594613405031	0.0470451	0.983523
AL928657.1	ENSDARG00000097119		35.9802082870844	7.75101452059168	8.67814182137655	0	9.68036448859975	10.5816323414269	-1.37055	0.625541
AL928685.1	ENSDARG00000095786		3.88975224725237	0	3.8569519206118	0	9.68036448859975	3.84786630597342	0.804376	1
AL928685.2	ENSDARG00000095907	555502	108.913062923066	174.397826713313	148.492648943554	59.2675847578824	75.506843011078	168.344150886337	-0.510384	0.647645
AL928707.2	ENSDARG00000098039		0	0.96887681507396	0	15.5455960020675	0	0	3.9003	1
AL928707.3	ENSDARG00000117700		11.6692567417571	0.96887681507396	4.82118990076475	0	1.93607289771995	0	-3.17307	1
AL928714.1	ENSDARG00000117452		100.161120366749	31.0040580823667	41.4622331465768	38.8639900051688	32.9132392612391	1.92393315298671	-1.22808	0.488564
AL928808.1	ENSDARG00000101333		198.377364609871	94.949927877248	57.854278809177	77.7279800103375	90.0273897439776	37.5166964832408	-0.774687	0.507831
AL928824.1	ENSDARG00000094456		104.050872614001	58.1326089044376	62.6754687099417	97.1599750129219	79.3789888065179	15.3914652238937	-0.22853	0.902974
AL928824.2	ENSDARG00000096744		12.6416948035702	26.1596740069969	18.320521622906	14.5739962519383	48.4018224429987	4.80983288246677	0.246797	0.929306
AL928824.3	ENSDARG00000096753		5.83462837087856	4.8443840753698	10.6066177816824	40.8071895054272	2.90410934657992	0.961966576493355	1.06913	0.738161
AL928835.1	ENSDARG00000096583		12.6416948035702	0	2.89271394045885	15.5455960020675	0	2.88589972948006	0.246704	0.968739
AL928845.1	ENSDARG00000093227		26.2558276689535	26.1596740069969	23.1417115236708	0.971599750129219	0	0	-6.18353	0.00109841
AL928854.1	ENSDARG00000105454		150.727899581029	135.642754110354	238.166781097779	425.560690556598	302.027372044312	190.469382145684	0.807462	0.283153
AL928866.1	ENSDARG00000095266		5.83462837087856	12.5953985959615	1.9284759603059	29.1479925038766	50.3378953407187	17.3153983768804	2.2496	0.131781
AL928866.2	ENSDARG00000117398		0.972438061813093	0.96887681507396	0	16.5171957521967	0	0	3.08935	1
AL928908.2	ENSDARG00000097490		40.8423985961499	128.860616404837	59.7827547694829	75.7847805100791	141.333321533556	160.64841827439	0.719122	0.521355
AL928908.3	ENSDARG00000097636		37.9250844107106	43.5994566783282	117.63703357866	37.8923902550395	47.4337859941388	35.5927633302541	-0.720038	0.576959
AL928920.3	ENSDARG00000096778		0	0	0	21.3751945028428	2.90410934657992	1.92393315298671	5.61535	0.124144
AL929009.1	ENSDARG00000096446		48.6219030906546	31.0040580823667	76.174800432083	14.5739962519383	64.8584420736183	45.2124290951877	-0.32185	0.858857
AL929017.1	ENSDARG00000074868	100170822	37.9250844107106	24.221920376849	15.4278076824472	76.7563802602083	49.3698588918587	4.80983288246677	0.755164	0.712059
AL929017.2	ENSDARG00000095449		2.91731418543928	2.90663044522188	0	11.6591970015506	0	0	1.00138	1
AL929028.1	ENSDARG00000105095		220.743440031572	133.705000480206	105.101939836671	135.052365267961	126.812774800657	101.006490531802	-0.340738	0.742913
AL929048.1	ENSDARG00000117298		76.8226068832343	29.0663044522188	24.1059495038237	0	16.4566196306196	3.84786630597342	-2.67845	0.132721
AL929057.1	ENSDARG00000103165		12.6416948035702	10.6576449658136	47.2476610274945	29.1479925038766	27.1050205680793	9.61966576493355	-0.0992691	0.972827
AL929058.1	ENSDARG00000092980	110438186	66.1257882032903	94.949927877248	107.030415796977	32.0627917542642	25.1689476703593	41.3645627892143	-1.44314	0.061381
AL929092.1	ENSDARG00000092217		6.80706643269165	0.96887681507396	0	0	11.6164373863197	0	0.579371	1
AL929105.1	ENSDARG00000105194		11.6692567417571	15.5020290411834	0	22.346794252972	2.90410934657992	0.961966576493355	-0.0519523	0.992621
AL929114.2	ENSDARG00000101825		88.4918636249915	76.5412683908428	105.101939836671	0	13.5525102840396	85.6150253079086	-1.44552	0.484638
AL929171.1	ENSDARG00000095920	110439353	21.393637359888	4.8443840753698	19.284759603059	0	17.4246560794795	18.2773649533737	-0.350365	0.92502
AL929192.1	ENSDARG00000106684		10.696818679944	9.6887681507396	19.284759603059	0	0	0	-6.21588	0.0223807
AL929208.1	ENSDARG00000105788	101885386	6.80706643269165	7.75101452059168	12.5350937419883	0	7.7442915908798	2.88589972948006	-1.34966	0.685913
AL929210.2	ENSDARG00000117295		200.322240733497	148.238152706316	197.668785931355	112.705571014989	121.004556107497	95.2346910728421	-0.731694	0.256923
AL929216.1	ENSDARG00000117377		12.6416948035702	17.4397826713313	3.8569519206118	0	0	0.961966576493355	-5.0288	0.0839904
AL929217.1	ENSDARG00000059891	562831	11.6692567417571	9.6887681507396	9.6423798015295	0	0.968036448859975	0.961966576493355	-4.00387	0.119749
AL929220.1	ENSDARG00000103323		7.77950449450474	15.5020290411834	9.6423798015295	1.94319950025844	4.84018224429987	7.69573261194684	-1.18467	0.638349
AL929222.2	ENSDARG00000097738		109.885500984879	168.584565822869	319.162771430626	12.6307967516798	21.2968018749194	23.0871978358405	-3.38966	2.44423e-06
AL929229.1	ENSDARG00000091975		12.6416948035702	7.75101452059168	3.8569519206118	0	0	6.73376603545348	-1.8472	0.655611
AL929237.1	ENSDARG00000094104	100536429	2.91731418543928	9.6887681507396	31.8198533450473	0	10.6484009374597	58.6799611660946	0.642051	0.857881
AL929237.2	ENSDARG00000095450		61.2635978942249	12.5953985959615	12.5350937419883	0	34.8493121589591	25.9730975653206	-0.506119	0.874436
AL929237.3	ENSDARG00000096676	103909355	19.4487612362619	17.4397826713313	14.4635697022942	0	21.2968018749194	0	-1.26985	0.728802
AL929243.1	ENSDARG00000096290		121.554757726637	79.4478988360647	65.5681826504006	28.1763927537474	90.9954261928376	54.8320948601212	-0.615299	0.616029
[truncated: 25,057 more rows]
