# Supplementary material for: An improved zebrafish transcriptome annotation for sensitive and comprehensive detection of cell type-specific genes
Source: eLife. 2020 Aug 24;9:e55792. doi: 10.7554/eLife.55792 (PMC7486121; doi:10.7554/eLife.55792)
Supplement: Figure 1—source data 2. — Gene symbol, along with matching Ensembl gene ID and NCBI ID, as well as differential annotation (i.e., identified as differentially expressed only in RefSeq, Ens95, or both) are indicated. Expression data are derived from Figure 1—source data 1. Data used to generate plots in Figure 1C–G. [file elife-55792-fig1-data2.xlsx]

## Sheet: title
	Figure 1 - source data 2
	Intersection of kdrl-pos-enriched genes from RefSeq and Ens95 commonly annotated by NCBI ID.

## Sheet: kdrlcherry RefSeqEns95 intersec
ID	Ensdarg	Matched NCBI ID	Differential identified in:	Ens95 kdrl02	Ens95 kdrl04	Ens 95 kdrl10	Ens95 log2 Fold Change	Ens95 padj	Ens95 -log10 padj	RefSeq kdrl02	RefSeq kdrl04	RefSeq kdrl10	RefSeq log2 Fold Change	RefSeq padj	RefSeq -log10 padj
abca1a	ENSDARG00000074635	558924	both	9887	7203.16	5387.01	1.33257	0.0020223	2.69415	9833.69	7185.96	5425.67	1.33425	0.0013407	2.87267
abcb11a	ENSDARG00000011573	797269	Ens95	168.087	178.119	104.854	2.5585	7.83836e-05	4.10577	109.792	81.252	45.2621	1.64406	0.0630767	1.20013
abcb4	ENSDARG00000010936	100136865	both	542.153	787.014	1465.08	5.05221	7.16045e-13	12.1451	5259.34	6252.53	3778.9	6.19368	2.3428e-19	18.6303		kdrl-pos enriched in:
abcc12	ENSDARG00000013050	568482	both	316.742	439.489	246.263	2.95161	1.106e-05	4.95624	315.774	439.148	247.497	2.95155	1.09918e-05	4.95893		both	1407
abcc2	ENSDARG00000014031	393561	both	2082.14	2325.22	1763.28	4.21813	3.57697e-11	10.4465	2070.51	2334.06	1776.78	4.22048	3.37961e-11	10.4711		Ens95 only	132
abcc4	ENSDARG00000058953	368620	RefSeq	112.706	71.6347	48.0983	1.35097	0.16118	0.792688	889.997	863.786	371.727	1.80147	0.00149487	2.8254		RefSeq only	222
abcg2a	ENSDARG00000100075	735312	both	3365.62	3530.43	2577.11	5.29195	1.78862e-22	21.7475	7591.21	6642.35	3745.2	5.53874	1.48811e-17	16.8274
abhd17b	ENSDARG00000035571	437017	Ens95	1175.64	1414.3	797.47	1.80203	2.04343e-05	4.68964	30.12	15.4766	68.3746	1.1755	0.518041	0.285636
abhd2a	ENSDARG00000025797	393888	both	658.745	957.388	672.415	2.13245	1.86388e-07	6.72958	654.867	955.678	677.005	2.1345	1.14641e-07	6.94066
abhd4	ENSDARG00000102887	550276	both	828.775	518.868	459.82	1.29048	0.00912002	2.04	825.871	521.367	468.992	1.28056	0.00741341	2.12998
abi1a	ENSDARG00000010155	393711	both	2573.77	2910.89	1950.87	1.98692	6.09881e-08	7.21475	1133.87	1177.19	599.963	2.13532	3.83483e-06	5.41625
ablim2	ENSDARG00000055223	568454	both	549.925	564.365	133.713	2.06603	0.0106939	1.97086	1394.26	1360.97	453.584	2.15301	0.000300922	3.52155
acap1	ENSDARG00000056346	561771	both	551.869	588.566	875.39	1.97268	0.00104868	2.97936	548.961	588.11	880.203	1.99022	0.000906557	3.04261
acap2	ENSDARG00000060783	100124613	both	340.06	478.21	259.731	2.25568	3.03539e-05	4.51779	359.497	468.166	169.492	2.76058	1.08716e-05	4.96371
ace	ENSDARG00000079166	565980	both	2101.57	2393.95	1300.58	3.28254	2.23942e-12	11.6499	2089.94	2388.23	1309.71	3.28077	1.19003e-12	11.9244
ACKR2	ENSDARG00000086314	101887081	both	251.644	272.018	354.966	3.87009	9.4314e-12	11.0254	824.899	827.029	585.518	4.40425	9.6621e-16	15.0149
ackr3a	ENSDARG00000062478	100000764	both	244.843	119.068	111.588	2.15693	0.00286873	2.54231	243.875	118.009	111.711	2.15127	0.00291022	2.53607
ackr3b	ENSDARG00000058179	561050	both	5573.1	5784.99	5418.76	1.95258	1.81752e-07	6.74052	5543.05	5777.6	5463.23	1.95564	8.10413e-08	7.09129
acot11b	ENSDARG00000042122	641574	RefSeq	47.6084	33.8813	46.1744	1.48585	0.225859	0.646162	160.316	137.355	108.822	2.40814	0.000315992	3.50032
acsbg2	ENSDARG00000004094	335159	both	7020.78	8934.98	3779.57	2.37665	1.19808e-06	5.92151	6999.5	8936.75	3800.09	2.37962	8.52285e-07	6.06941
actb1	ENSDARG00000037746	57934	both	58315.4	99935.2	96283.2	1.43534	0.00370607	2.43109	57857.6	99580.1	96926.3	1.43797	0.00292743	2.53351
actb2	ENSDARG00000037870	57935	both	165296	183362	180787	1.20392	0.00146619	2.83381	164410	182888	181635	1.20631	0.000948834	3.02281
actn4	ENSDARG00000099786	322221	both	534.38	666.009	465.592	1.46485	0.000645731	3.18995	3095.56	3672.78	1805.67	1.81233	8.08468e-05	4.09234
actr2a	ENSDARG00000052438	406820	both	2602.92	2925.41	2713.71	1.23893	0.00234322	2.63019	2637.93	2947.32	2739.8	1.25061	0.00145747	2.8364
acvrl1	ENSDARG00000018179	266753	both	7756.28	9568.07	5061.87	4.60267	5.79719e-22	21.2368	7714.6	9563.55	5100.17	4.60229	1.9133e-22	21.7182
acy3.2	ENSDARG00000005525	436619	Ens95	947.31	925.443	479.059	1.44402	0.00949269	2.02261	198.209	42.5606	239.793	1.06185	0.355434	0.449241
adam10a	ENSDARG00000053468	566044	both	5020.26	6122.83	5293.7	1.58707	8.22912e-06	5.08465	4914.42	6027.16	5248.48	1.60758	3.59458e-06	5.44435
adam12	ENSDARG00000079068	563275	both	743.274	809.278	298.21	2.01808	0.000744712	3.12801	718.022	825.095	310.093	1.88572	0.00107196	2.96982
adam15	ENSDARG00000089213	795199	both	581.988	503.379	325.145	1.64309	0.00157609	2.80242	411.964	329.844	122.304	1.86394	0.0078701	2.10402
adam17a	ENSDARG00000043213	324142	RefSeq	1487.52	1524.66	751.296	1.04974	0.0587206	1.23121	1479.77	1519.61	756.936	1.05703	0.0459932	1.33731
adam8a	ENSDARG00000001452	368917	both	701.495	1003.85	459.82	1.97719	0.00377136	2.4235	697.618	1001.14	463.214	1.99056	0.00301751	2.52035
adam8b	ENSDARG00000057644	100005593	Ens95	273.991	273.954	218.366	1.83807	0.0172662	1.7628	103.963	176.046	109.785	1.51174	0.126277	0.898675
adamts10	ENSDARG00000075188	564734	RefSeq	22.3468	74.5388	17.3154	0.595613	0.741198	0.130066	775.347	1377.41	734.787	1.672	0.000802813	3.09539
adap2	ENSDARG00000070565	100331455	both	198.206	243.945	262.617	2.82089	2.77019e-07	6.55749	742.312	871.524	533.515	3.26985	2.72064e-12	11.5653
adarb1a	ENSDARG00000041609	58134	both	1864.5	1339.76	1084.14	1.82895	4.03841e-05	4.39379	1865.5	1337.76	1092.07	1.83705	2.47435e-05	4.60654
adcy2b	ENSDARG00000014588	557902	both	5077.58	3325.21	2059.57	4.25013	1.82157e-15	14.7396	5022.27	3288.77	2082.06	4.29484	1.27334e-15	14.8951
adcy6a	ENSDARG00000061445	570652	Ens95	597.534	645.68	325.145	1.524	0.00344555	2.46274	1028.94	1117.21	775.234	0.840859	0.0482417	1.31658
adgra2	ENSDARG00000076994	560700	both	314.798	389.151	161.61	1.47649	0.0381956	1.41799	291.484	325.975	138.675	1.55854	0.0286547	1.5428
adgrl4	ENSDARG00000013653	406676	both	4084.61	4807.27	2813.75	6.87587	1.20041e-34	33.9207	4041.91	4782.26	2833.21	7.00202	9.02802e-31	30.0444
adipor2	ENSDARG00000101849	560140	both	7555.16	8575.83	3951.76	1.79255	0.000230853	3.63666	2397.94	3363.25	1975.16	1.61316	0.000220318	3.65695
adma	ENSDARG00000015263	556502	both	997.833	1943.82	667.605	3.41392	1.97617e-08	7.70418	1062.94	2010.02	683.746	3.43119	2.12709e-08	7.67221
adora2aa	ENSDARG00000033706	561701	both	545.067	304.931	210.671	2.23841	0.000206743	3.68457	363.383	249.56	186.826	2.83055	1.73364e-06	5.76104
adra1aa	ENSDARG00000028725	798498	both	97.16	212	118.322	1.63542	0.0209048	1.67975	96.1897	211.836	119.415	1.63527	0.0197342	1.70478
adra1d	ENSDARG00000024101	568614	both	1468.09	1448.18	679.148	2.86495	5.78841e-08	7.23744	1342.77	1355.17	654.856	2.86966	1.69472e-08	7.7709
adsl	ENSDARG00000017049	334431	both	707.325	621.479	550.245	1.35294	0.00986288	2.006	703.448	609.39	553.738	1.35312	0.00837516	2.07701
aep1	ENSDARG00000039099	503710	both	92.302	194.575	455.01	2.33411	0.00881777	2.05464	91.3316	193.457	458.399	2.32682	0.00891572	2.04984
afap1l1b	ENSDARG00000056453	768144	both	4749.18	5446.17	2475.14	5.55152	2.5475e-27	26.5939	4779.36	5497.08	2533.71	5.56234	3.2212e-28	27.492
afdna	ENSDARG00000029472	558359	both	3400.6	3761.79	2279.86	2.14025	1.24101e-07	6.90622	1107.64	1290.36	448.769	2.31905	5.05269e-05	4.29648
agfg1a	ENSDARG00000030020	327597	both	822.945	803.47	1200.53	1.09316	0.017148	1.76579	793.808	730.301	1175.85	1.10591	0.0187502	1.727
agpat4	ENSDARG00000069044	406265	both	1000.75	951.58	429.999	1.44487	0.0103382	1.98555	988.13	957.613	435.286	1.42667	0.0092416	2.03425
agpat5	ENSDARG00000063187	767778	RefSeq	107.848	85.1872	152.953	0.718692	0.404685	0.392883	667.498	844.44	570.11	1.07373	0.0253244	1.59646
agtr1b	ENSDARG00000045443	100333455	RefSeq	153.513	83.2511	10.5816	2.44075	0.0598389	1.22302	172.947	115.107	80.8939	2.26851	0.00201451	2.69583
agtr2	ENSDARG00000035552	503772	both	1110.54	1021.28	684.92	1.40783	0.010329	1.98594	1104.72	1018.55	689.524	1.41128	0.00845791	2.07274
ahi1	ENSDARG00000044056	562701	both	1443.8	1167.45	650.289	1.12375	0.0463929	1.33355	1436.04	1164.61	650.041	1.12757	0.0377463	1.42313
ahnak	ENSDARG00000061764	559276	both	12363.6	13961	8987.65	1.11798	0.0119058	1.92424	12297.7	13932.8	9058.19	1.11951	0.00849594	2.07079
ahr2	ENSDARG00000021833	30517	both	6620.48	6604.91	3312.05	1.84638	5.94894e-05	4.22556	6585.59	6580.44	3333.02	1.85326	3.59557e-05	4.44423
ak1	ENSDARG00000001950	445486	both	2918.69	2984.46	1244.78	1.81645	0.00278654	2.55493	3232.56	3252.98	1326.08	1.83207	0.00235029	2.62888
akap12b	ENSDARG00000055678	567365	both	28126.8	27141.8	20198.4	3.10029	1.87742e-16	15.7264	27226.5	26600.4	20135.8	3.09532	3.04941e-17	16.5158
AL732488.1	ENSDARG00000096717	110438942	RefSeq	199.178	281.699	710.893	0.441969	0.719979	0.14268	1309.73	1452.86	1802.78	1.0537	0.0370293	1.43145
alas1	ENSDARG00000021059	64608	both	5685.8	6113.15	4279.79	1.61671	0.000155227	3.80903	5655.76	6098.74	4310.49	1.61759	9.80035e-05	4.00876
alg5	ENSDARG00000021938	445564	both	2425.11	2354.26	1398.7	1.25301	0.00717487	2.14419	1369.97	1097.87	584.555	1.89929	0.000273545	3.56297
alpl	ENSDARG00000015546	393982	both	146.712	278.794	213.557	1.78838	0.00150896	2.82132	2274.55	3319.72	1198.96	2.69552	1.64025e-07	6.78509
amdhd2	ENSDARG00000100376	402981	RefSeq	393.498	446.265	422.303	0.880977	0.0836661	1.07745	356.582	397.554	387.135	1.05368	0.0276194	1.55879
ammecr1	ENSDARG00000012892	393553	both	2045.22	1877.99	1067.78	1.05711	0.0353017	1.4522	2033.59	1872.66	1073.77	1.05697	0.0276194	1.55879
amotl2a	ENSDARG00000061923	558920	Ens95	4634.53	5529.42	4097.98	1.67054	6.36141e-06	5.19645	74.8142	209.901	107.859	1.2522	0.231401	0.635634
angpt2a	ENSDARG00000014946	101101687	both	1560.39	1765.7	553.131	6.6103	1.27357e-22	21.895	1552.64	1761.43	557.59	6.60741	1.0615e-22	21.9741
ankdd1a	ENSDARG00000098647	569271	both	276.906	186.831	120.246	2.1581	0.00167007	2.77727	266.222	178.948	121.341	2.15797	0.00137077	2.86303
ankrd50l	ENSDARG00000007077	449857	both	313.827	585.662	461.744	1.50073	0.00498382	2.30244	311.888	584.241	465.14	1.50954	0.00415766	2.38115
anks1ab	ENSDARG00000078901	100003659	RefSeq	51.4948	90.9954	115.436	0.752293	0.46223	0.335142	458.601	591.012	577.814	1.39481	0.00816013	2.0883
anks1b	ENSDARG00000003512	565408	both	5698.43	5020.24	3829.59	2.64154	9.03093e-09	8.04427	6115.33	5426.47	4100.55	2.66051	2.33067e-09	8.63252
ano5a	ENSDARG00000015731	100534737	both	164.2	91.9635	33.6688	2.09557	0.0285821	1.54391	288.569	194.424	60.6705	1.69797	0.0402083	1.39568
ano5b	ENSDARG00000036147	560102	both	1594.4	1344.6	1123.58	1.70693	6.5996e-05	4.18048	1571.1	1333.89	1131.55	1.71917	3.95356e-05	4.40301
ANO7	ENSDARG00000104834	556876	both	348.804	302.995	213.557	5.27796	2.98763e-13	12.5247	464.431	490.414	330.317	5.28553	9.65558e-20	19.0152
ano9a	ENSDARG00000078941	100126106	Ens95	147.683	227.489	125.056	1.298	0.0425323	1.37128	31.0916	126.714	22.1495	0.261605	0.876637	0.0571803
antxr2a	ENSDARG00000104118	557239	Ens95	833.633	1089.04	666.643	2.04435	1.50358e-06	5.82287	1967.52	2276.99	1455.13	0.400116	0.542565	0.265548
anxa11a	ENSDARG00000077383	368215	both	3042.08	2832.47	2179.82	1.11169	0.044354	1.35307	3004.23	2825.44	2186.06	1.1117	0.0372013	1.42944
anxa11b	ENSDARG00000002632	353365	both	3009.04	3461.7	2750.26	1.02583	0.00545004	2.2636	2985.77	3420.32	2752.32	1.02623	0.00339663	2.46895
anxa13	ENSDARG00000013976	81880	both	5073.69	5963.1	2364.51	2.499	4.41347e-07	6.35522	4367.4	5416.8	1957.83	2.57497	4.30822e-07	6.3657
anxa2a	ENSDARG00000003216	325557	both	5530.35	6379.36	3078.29	1.33978	0.0256758	1.59048	5400.22	6318.31	3084.56	1.33414	0.0219096	1.65937
anxa3b	ENSDARG00000044254	492336	both	1227.13	1316.53	850.378	1.23261	0.00382179	2.41773	1219.37	1313.57	853.238	1.244	0.00242631	2.61505
ap1b1	ENSDARG00000020621	562166	both	2575.71	3278.74	2753.15	1.18491	0.00138946	2.85715	2562.14	3265.56	2791.8	1.18763	0.000852923	3.06909
ap1s3b	ENSDARG00000027966	447897	both	409.043	879.945	339.574	1.4792	0.0481141	1.31773	406.134	878.295	342.836	1.48045	0.0420988	1.37573
ap2m1a	ENSDARG00000002790	321051	both	6310.54	8114.08	5575.56	1.11583	0.00710208	2.14861	6276.62	8095.21	5614.42	1.11757	0.00490512	2.30935
ap3b1a	ENSDARG00000100082	563316	both	240.957	240.073	287.628	1.42697	0.0100214	1.99907	833.644	1377.41	1004.43	1.51513	0.00158593	2.79972
apaf1	ENSDARG00000021239	58131	both	589.761	592.438	389.596	1.46248	0.00241596	2.61691	281.768	186.686	233.052	1.52853	0.00336274	2.47331
apbb2b	ENSDARG00000099995	564990	both	209.866	351.397	159.686	1.6034	0.00840682	2.07537	278.853	358.863	171.418	1.61912	0.00396846	2.40138
apc	ENSDARG00000058868	386762	both	5093.13	5307.74	5318.71	1.04455	0.0135654	1.86757	5067.93	5297.82	5369.82	1.04533	0.010264	1.98868
aplnra	ENSDARG00000002172	561935	both	4008.82	4224.51	2577.11	2.85964	1.44121e-11	10.8413	3536.67	3799.5	2344.96	2.94648	2.5406e-12	11.5951
aplnrb	ENSDARG00000036670	565492	both	1272.8	1479.16	704.16	3.25444	2.74096e-12	11.5621	1249.49	1475.11	703.97	3.25072	1.85322e-12	11.7321
aplp2	ENSDARG00000054864	796801	both	4687.97	6946.63	6236.43	1.23302	0.00118482	2.92635	4662.77	6930.6	6281.8	1.23486	0.000791462	3.10157
appa	ENSDARG00000104279	58083	both	16879.6	18337.5	9294.52	1.40651	0.00229275	2.63964	16765.2	18288.5	9345.18	1.40721	0.00162907	2.78806
aqp1a.1	ENSDARG00000023713	335821	both	29722.2	31264.7	13858.1	4.51957	2.5614e-14	13.5915	29545.8	31176.6	13945.5	4.52236	1.77459e-14	13.7509
aqp1a.2	ENSDARG00000091027	559284	RefSeq	113.677	124.877	117.36	1.97041	0.0653213	1.18495	219.584	237.952	160.825	2.00917	0.0470828	1.32714
aqp7	ENSDARG00000026787	334529	both	274.963	200.384	84.6531	3.58931	2.8844e-05	4.53994	273.023	212.803	85.7091	3.4753	3.46444e-05	4.46037
aqp8a.1	ENSDARG00000045141	447923	both	4321.68	4419.09	2941.69	5.60705	2.31138e-15	14.6361	4298.41	4408.89	2962.26	5.60537	2.23789e-15	14.6502
arap3	ENSDARG00000076801	558931	both	3562.86	3319.4	1405.43	4.00416	2.30054e-14	13.6382	3428.82	3282	1385.79	4.08577	2.88281e-14	13.5402
arf1	ENSDARG00000009484	114428	both	2995.44	3179.03	1993.19	1.35155	0.00266082	2.57498	2903.18	2987.95	2005.98	1.36859	0.00135731	2.86732
arf2b	ENSDARG00000016393	327026	both	2642.75	3937	2642.52	1.03815	0.0166148	1.7795	2598.09	3820.78	2575.12	1.08052	0.00890966	2.05014
arf6a	ENSDARG00000101626	336063	both	4141.93	3929.26	2289.48	2.05341	5.64005e-06	5.24872	4119.64	3920.41	2305.48	2.05263	3.4464e-06	5.46263
arf6b	ENSDARG00000052928	100003206	both	2376.53	2652.42	2127.87	1.3565	0.00179223	2.74661	2363.93	2646.49	2142.73	1.35734	0.0012912	2.88901
arg2	ENSDARG00000039269	322614	both	2689.39	1555.63	2377.02	1.96171	0.0024694	2.60741	2532.02	1526.38	2359.41	1.93855	0.00252474	2.59778
arhgap17a	ENSDARG00000020488	550254	both	331.316	448.201	81.7672	2.4567	0.0017744	2.75095	457.63	538.778	98.2284	2.50591	0.00113579	2.9447
arhgap17b	ENSDARG00000062263	100141341	both	264.275	292.347	237.606	1.71501	0.00180797	2.74281	712.192	790.272	535.441	1.73418	0.000250823	3.60063
arhgap27l	ENSDARG00000061798	566523	both	2788.49	3287.45	1795.99	3.2629	1.0421e-08	7.98209	2770.07	3277.16	1803.74	3.30071	4.07359e-08	7.39002
arhgap29a	ENSDARG00000026329	564805	both	1683.78	1239.09	1959.53	3.64789	3.36986e-18	17.4724	3631.89	2956.02	2535.64	4.14065	1.08278e-28	27.9655
arhgap29b	ENSDARG00000017748	378998	both	1582.74	2059.98	871.542	1.5391	0.00463162	2.33427	1576.93	2057.42	852.275	1.52763	0.00487124	2.31236
arhgap31	ENSDARG00000059472	101885883	both	744.245	889.625	385.749	3.01323	7.28378e-06	5.13764	954.124	1036.93	548.923	2.81201	1.46135e-05	4.83525
arhgap4b	ENSDARG00000015003	561231	RefSeq	284.679	90.9954	303.981	1.2637	0.134914	0.869943	1076.55	613.259	1241.34	1.26264	0.0121745	1.91455
arhgdia	ENSDARG00000043795	406770	both	8765.77	12506.1	9554.25	1.83935	0.00047781	3.32074	8718.28	12477	9623.49	1.84093	0.000370963	3.43067
arhgdig	ENSDARG00000004034	394132	both	5823.77	5372.6	5348.53	1.77349	0.000252208	3.59824	5200.07	4818.05	4740	1.94866	0.000112236	3.94987
arhgef10	ENSDARG00000077788	334278	both	175.86	212.968	94.2727	1.63156	0.0132846	1.87665	241.932	297.924	312.019	1.45349	0.00352442	2.45291
arhgef12b	ENSDARG00000100913	571031	both	2356.13	3238.08	2446.28	1.95807	1.48798e-07	6.8274	2540.77	3609.91	2541.42	1.95645	1.49375e-07	6.82572
arhgef1a	ENSDARG00000040380	368266	both	2431.91	2022.23	1564.16	2.8521	9.0097e-13	12.0453	2462.07	2054.51	1588.02	2.80075	6.28266e-13	12.2019
arhgef3	ENSDARG00000013834	570228	RefSeq	28.1764	54.21	0	2.82268	0.314758	0.502023	544.103	485.577	241.719	3.30102	7.55954e-07	6.1215
arhgef39	ENSDARG00000013476	492469	both	236.099	189.735	162.572	1.21291	0.0325949	1.48685	234.159	189.588	163.714	1.29006	0.0180552	1.7434
arhgef7b	ENSDARG00000073848	494081	both	3318.98	4181.92	3371.69	2.28333	1.12635e-11	10.9483	3304.45	4172.87	3419.69	2.27597	3.0941e-12	11.5095
arhgef9b	ENSDARG00000078624	560923	both	4910.47	4633.99	2625.21	4.45419	1.15835e-13	12.9362	5322.49	5120.81	2872.7	4.37564	5.91633e-15	14.2279
arid3c	ENSDARG00000067729	569444	both	324.514	181.023	55.7941	2.04767	0.0330134	1.48131	3288.91	3202.68	1536.02	1.61451	0.0018164	2.74079
arl15b	ENSDARG00000057995	560030	RefSeq	0	20.3288	27.897	-0.269925	0.938321	0.0276488	1074.6	1271.01	1100.74	1.23167	0.00163324	2.78695
arl4aa	ENSDARG00000099918	393834	both	1624.51	1954.47	1148.59	2.15045	3.32241e-06	5.47855	1615.79	1950.05	1156.59	2.15041	2.13184e-06	5.67124
arl4ab	ENSDARG00000033182	338267	both	1461.29	1608.88	1765.21	2.88138	6.76163e-12	11.1699	1453.53	1604.73	1777.74	2.88385	3.50898e-12	11.4548
arl5c	ENSDARG00000035719	393819	both	5798.51	6167.36	3108.11	2.81644	5.3456e-06	5.272	5763.61	6139.36	3112.49	2.82381	3.70248e-06	5.43151
arl6ip6	ENSDARG00000071013	100037347	both	210.837	180.055	145.257	1.35121	0.0278706	1.55485	463.459	554.255	586.481	1.11157	0.0172348	1.76359
arnt	ENSDARG00000021855	493634	RefSeq	185.576	201.352	130.827	0.794614	0.266609	0.574126	2032.61	1322.28	560.479	1.47122	0.0266408	1.57445
arpc1a	ENSDARG00000008383	394243	both	2846.79	3981.53	2264.47	1.26749	0.0115111	1.93888	2831.28	3972.64	2280.44	1.26797	0.00896114	2.04764
arpc1b	ENSDARG00000027063	335474	both	2236.62	2118.06	2852.23	1.76685	1.03751e-05	4.98401	2014.15	1931.67	2733.06	1.77806	9.8562e-06	5.00629
arpc3	ENSDARG00000057882	415204	both	4590.81	4893.42	3040.78	1.40145	0.0233155	1.63236	4566.58	4881.89	3063.38	1.4017	0.0195146	1.70964
arpc5a	ENSDARG00000039142	336504	both	3666.82	4724.99	3239.9	1.74867	0.00152763	2.81598	3647.43	4713.58	3262.72	1.74929	0.00123597	2.90799
arrb2b	ENSDARG00000011545	394099	both	3462.78	3918.61	2996.53	1.26841	0.00218301	2.66094	2451.38	2735.48	2188.95	1.14919	0.00456549	2.34051
arrdc3a	ENSDARG00000052690	566685	both	3368.54	5596.22	1973.96	1.33353	0.0237878	1.62365	3350.12	5583.17	1983.83	1.3367	0.0194496	1.71109
arvcfb	ENSDARG00000061688	564669	both	2700.08	2960.26	2485.72	1.13925	0.00245173	2.61053	2762.29	2916.37	2526.01	1.17907	0.00107662	2.96794
asap1b	ENSDARG00000039729	565859	both	2213.3	2054.17	1849.86	1.19837	0.003458	2.46118	1300.02	1372.58	1404.09	1.21788	0.00769529	2.11377
asap2a	ENSDARG00000010181	570669	both	241.928	155.854	137.561	1.74321	0.00573223	2.24168	2151.15	2027.43	1473.43	2.08772	1.14552e-08	7.941
ascc1	ENSDARG00000077760	550273	both	346.861	334.941	474.25	1.4616	0.0363644	1.43932	344.923	334.681	494.031	1.46694	0.0286643	1.54266
atf7a	ENSDARG00000011298	566279	both	239.014	187.799	58.68	1.68409	0.0491545	1.30844	238.045	187.653	58.7444	1.67198	0.0464643	1.33288
atg4da	ENSDARG00000043548	795933	both	339.088	680.53	455.01	1.10648	0.047858	1.32005	397.39	758.352	481.512	1.16843	0.0252957	1.59695
atl1	ENSDARG00000060481	571909	both	1258.22	862.52	487.717	1.9179	0.00109841	2.95924	1251.44	860.884	492.105	1.90342	0.00103889	2.98343
atp10a	ENSDARG00000061039	567172	RefSeq	449.851	393.023	261.655	1.15252	0.0642493	1.19213	1345.68	1388.05	877.314	1.21274	0.00963848	2.01599
atp11c	ENSDARG00000036442	368385	RefSeq	194.32	190.703	152.953	1.1513	0.0710582	1.14839	2252.2	2931.84	1977.09	1.95565	2.01879e-07	6.69491
atp1b1a	ENSDARG00000013144	64267	both	6192.01	9338.65	10905.8	1.10071	0.025253	1.59769	6159.05	9316.9	10978.5	1.10394	0.0202847	1.69283
atp8b5a	ENSDARG00000062040	100330945	RefSeq	82.586	158.758	198.165	1.2476	0.1633	0.787015	225.414	272.775	283.129	1.65503	0.0107735	1.96764
avpr1ab	ENSDARG00000045788	555939	both	1294.17	1130.67	792.66	3.21346	7.83208e-12	11.1061	98.1329	136.387	141.564	2.55477	0.0074742	2.12644
azin1a	ENSDARG00000052789	550230	both	664.574	954.484	371.319	2.38323	7.33683e-05	4.13449	259.421	474.937	248.46	1.7825	0.00547598	2.26154
b3gnt2b	ENSDARG00000091902	793362	both	609.193	573.078	560.827	1.28972	0.00115197	2.93856	605.315	571.666	564.332	1.30408	0.000624044	3.20478
b3gnt3.4	ENSDARG00000058100	561172	both	307.026	420.128	519.462	4.08113	2.53551e-14	13.5959	1452.56	1182.99	926.428	4.36843	7.91991e-23	22.1013
b3gnt5a	ENSDARG00000018971	336526	both	1197.01	1332.02	1968.18	1.97701	0.000116549	3.93349	1108.61	1241.03	1949.16	1.9395	0.000196922	3.70571
b3gnt7	ENSDARG00000038489	286748	both	134.081	166.502	98.1206	2.2418	0.000463722	3.33374	133.111	166.373	98.2284	2.23818	0.000470809	3.32716
bada	ENSDARG00000087993	564921	both	358.52	178.119	95.2347	2.21847	0.00800344	2.09672	1670.2	975.024	847.46	1.39488	0.016782	1.77516
badb	ENSDARG00000054937	58100	both	867.639	971.909	576.218	1.95881	5.97957e-05	4.22333	863.764	975.024	581.666	1.96404	4.19423e-05	4.37735
bag2	ENSDARG00000035005	393975	both	1318.46	681.498	417.493	3.25834	2.30099e-05	4.63809	1310.71	680.969	419.878	3.23331	1.43823e-05	4.84217
bambia	ENSDARG00000055381	83496	both	1258.22	1099.69	1107.22	1.4546	0.000225376	3.64709	1251.44	1096.9	1115.18	1.45743	0.000138003	3.86011
bambib	ENSDARG00000099677	431736	both	913.304	1012.57	699.35	1.26098	0.0178428	1.74854	908.458	1010.81	704.933	1.26078	0.014505	1.83848
baxa	ENSDARG00000020623	58081	both	1412.71	1665.02	1255.37	1.60207	2.72335e-05	4.5649	1363.17	1632.78	1193.19	1.63087	1.76761e-05	4.75261
baxb	ENSDARG00000030881	503609	both	508.147	702.794	280.894	1.5315	0.00921144	2.03567	505.239	701.282	283.129	1.5487	0.00756831	2.121
bbc3	ENSDARG00000069282	751763	both	1311.66	1404.62	403.064	2.41986	6.67992e-05	4.17523	1304.88	1411.27	405.433	2.41138	5.93342e-05	4.22669
bcar1	ENSDARG00000056525	568309	both	2615.55	2848.93	2175.01	1.45937	0.000658684	3.18132	2601.01	2842.85	2196.66	1.45579	0.000445467	3.35118
bcar3	ENSDARG00000016981	570610	RefSeq	96.1884	91.9635	139.485	0.728501	0.423615	0.373029	915.259	870.557	703.007	1.46515	0.000274586	3.56132
bcl2l10	ENSDARG00000026766	373113	both	9267.12	9508.05	5897.82	2.85099	1.23491e-12	11.9084	9217.69	9486.17	5940.89	2.85153	3.91664e-13	12.4071
bcl3	ENSDARG00000087832	565656	both	156.428	370.758	234.72	2.10268	0.00241596	2.61691	620.861	1045.64	618.261	3.00336	7.38399e-07	6.13171
bcl6b	ENSDARG00000069335	793278	both	5917.04	6856.6	5497.64	7.57463	5.80699e-43	42.236	5900.6	6841.61	5538.35	7.53202	1.21683e-46	45.9148
bida	ENSDARG00000069290	559425	both	548.954	687.306	549.283	1.68586	1.99317e-05	4.70045	403.219	556.189	370.764	1.65199	0.000181216	3.7418
bin2b	ENSDARG00000010255	327387	both	459.567	625.352	657.985	2.12804	0.000143365	3.84356	437.226	613.259	653.893	2.22062	0.000256907	3.59022
blf	ENSDARG00000043126	503516	both	1689.61	273.954	1813.31	4.2648	1.37765e-07	6.86086	1709.07	273.742	1831.67	4.26513	1.22826e-07	6.91071
bmf2	ENSDARG00000041414	751764	RefSeq	22.3468	61.9543	45.2124	-0.146761	0.934518	0.0294124	444.027	546.516	386.172	1.27154	0.0039523	2.40315
bmp16	ENSDARG00000103679	100329171	both	3357.85	2830.54	2425.12	3.82405	1.0518e-23	22.9781	339.093	483.643	814.717	3.49308	2.25293e-08	7.64725
bmp1b	ENSDARG00000028053	559877	both	442.078	552.749	326.107	1.52848	0.00191842	2.71706	427.51	551.353	327.428	1.55268	0.00143075	2.84444
bmp6	ENSDARG00000015686	503761	both	449.851	461.753	252.997	2.66993	2.70415e-07	6.56797	445.97	460.428	255.201	2.65088	2.49037e-07	6.60374
bmpr1aa	ENSDARG00000019728	58145	Ens95	3884.46	4140.29	1719.03	1.80198	0.000302325	3.51953	2146.29	1765.3	496.92	0.960792	0.204003	0.690364
bmpr2a	ENSDARG00000011941	562822	both	1056.13	1094.85	598.343	1.80317	0.000149918	3.82415	1091.12	1174.28	558.553	1.80153	0.000355458	3.44921
bnip2	ENSDARG00000013397	394197	both	234.156	293.315	101.006	1.5529	0.0488027	1.31156	1330.14	1434.48	829.163	1.6741	0.000162097	3.79022
BOLA2	ENSDARG00000111714	553698	both	561.585	536.292	285.704	1.39482	0.0455779	1.34125	558.677	500.087	284.092	1.49985	0.0334215	1.47597
brf2	ENSDARG00000002060	445142	both	193.348	112.292	79.8432	1.46702	0.0480167	1.31861	190.436	98.6631	73.1898	1.65274	0.0298932	1.52443
bri3	ENSDARG00000086332	100002236	both	1054.19	1597.26	1140.89	1.79416	4.71317e-06	5.32669	1048.37	1595.05	1149.85	1.79076	2.89934e-06	5.5377
brox	ENSDARG00000013659	492786	both	910.389	794.758	327.069	1.73707	0.0075092	2.12441	201.124	209.901	71.2637	2.33027	0.00133482	2.87458
bsg	ENSDARG00000019881	337692	both	6433.93	8374.48	5733.32	1.19981	0.0175835	1.75489	6399.04	8355.41	5774.29	1.20025	0.0141029	1.85069
btbd10b	ENSDARG00000020252	557247	both	3862.11	3719.2	2386.64	1.82821	6.41854e-06	5.19256	3841.76	3710.51	2403.71	1.82861	3.3968e-06	5.46893
btg1	ENSDARG00000027249	114432	both	38197.5	33428.2	26760.9	1.4954	0.0038556	2.41391	24156.2	21718.5	14658.2	1.69187	0.00212057	2.67355
BX005305.3	ENSDARG00000114194	100005356	Ens95	4.858	90.9954	0	6.5248	0.0385457	1.41402	32.0632	148.962	0	5.96194	0.318351	0.497094
BX469885.1	ENSDARG00000091988	100534988	RefSeq	139.91	173.279	73.1095	1.14077	0.160314	0.795029	137.969	146.06	52.0032	1.68491	0.0454183	1.34277
BX539336.1	ENSDARG00000100606	100331456	RefSeq	26.2332	91.9635	19.2393	1.42036	0.333147	0.477365	2889.58	3084.67	1701.66	2.08664	8.72518e-07	6.05923
BX649411.1	ENSDARG00000101254	108183364	both	123.393	34.8493	58.68	2.38309	0.0288546	1.53978	115.622	34.8223	79.9309	2.06196	0.026617	1.57484
BX663503.3	ENSDARG00000099137	100333499	both	2952.69	3004.79	2340.46	2.15724	3.50897e-06	5.45482	2934.27	2999.55	2354.59	2.15972	2.12173e-06	5.67331
BX908750.1	ENSDARG00000097553	110439470	Ens95	566.443	451.105	468.478	1.01069	0.0466486	1.33116	1892.7	1345.49	1132.52	0.788331	0.276566	0.558201
BX936320.1	ENSDARG00000092398	101886778	RefSeq	166.144	172.31	124.094	0.155619	0.885764	0.0526819	171.004	205.065	89.5611	1.9084	0.00506818	2.29515
bzw1b	ENSDARG00000099148	406812	RefSeq	8711.36	6636.86	6624.1	1.3074	0.0574978	1.24035	8481.21	6382.15	6532.19	1.30427	0.0489058	1.31064
ca16b	ENSDARG00000060123	569183	both	7882.59	8192.49	5189.81	4.28416	1.01055e-23	22.9954	7825.37	8151.32	5208.99	4.30189	1.01188e-24	23.9949
ca4a	ENSDARG00000043589	555196	both	1909.19	1718.26	1145.7	4.42681	7.30654e-19	18.1363	4680.26	3109.82	1800.85	4.57663	2.28785e-17	16.6406
CABZ01020840.1	ENSDARG00000090401	101885512	both	753.961	531.452	455.972	2.2082	0.000988015	3.00524	750.085	530.073	459.362	2.21095	0.000843761	3.07378
CABZ01032488.1	ENSDARG00000099154	100536795	both	1211.58	1029.99	924.45	1.21798	0.0167077	1.77708	1086.26	999.206	1022.73	1.10891	0.0228693	1.64075
CABZ01043952.1	ENSDARG00000110954	562793	RefSeq	16.5172	108.42	0.961967	1.5332	0.527039	0.278157	396.418	475.905	180.085	1.97227	0.00330542	2.48077
CABZ01044235.1	ENSDARG00000110105	100538044	RefSeq	41.7788	113.26	32.7069	0.728028	0.586018	0.232089	22.3471	92.8594	45.2621	2.67306	0.0240692	1.61854
CABZ01044746.1	ENSDARG00000117312	321191	both	436.248	424.968	277.046	1.49897	0.00303093	2.51842	340.064	345.321	219.569	1.6696	0.00406149	2.39131
CABZ01052810.1	ENSDARG00000107296	100333552	RefSeq	129.223	55.1781	31.7449	-0.18145	0.919469	0.0364629	376.986	343.386	139.638	1.41523	0.0369628	1.43224
CABZ01054965.1	ENSDARG00000090844	799279	both	441.106	252.658	202.013	2.13866	0.000306372	3.51375	439.169	251.494	202.235	2.23386	0.00020018	3.69858
CABZ01061591.1	ENSDARG00000112977	100329328	Ens95	992.003	1050.32	640.67	1.19378	0.0108574	1.96428	106.877	147.027	90.5242	0.896395	0.259924	0.585154
CABZ01076275.1	ENSDARG00000100753	564077	Ens95	10945.1	11930.1	6330.7	2.07392	3.31686e-06	5.47927	127.281	115.107	77.0418	1.50651	0.104215	0.982068
CABZ01079873.1	ENSDARG00000117527	101886164	Ens95	22.3468	24.2009	7.69573	4.22039	0.0405155	1.39238	6.80129	22.2476	7.70418	4.24246	1	0
CABZ01085140.1	ENSDARG00000098070	101887175	RefSeq	20.4036	23.2329	4.80983	-1.04379	0.526222	0.278831	5162.18	4891.56	3035.45	4.69109	2.69691e-15	14.5691
CABZ01085195.1	ENSDARG00000101753	110440004	Ens95	776.308	529.516	156.801	2.43814	0.00270251	2.56823	29.1484	24.1821	13.4823	0.108569	0.954933	0.0200271
CABZ01088025.1	ENSDARG00000033955	100537117	Ens95	65.0972	52.274	28.859	2.28313	0.0392797	1.40583	65.0981	43.5279	30.8167	2.77425	0.0670496	1.1736
CABZ01117603.1	ENSDARG00000100939	103909724	Ens95	323.543	333.005	505.994	1.10573	0.0412391	1.38469	9.71613	10.6401	10.5933	0.913528	1	0
cacnb2a	ENSDARG00000099045	795492	both	641.256	466.594	212.595	1.85858	0.00430662	2.36586	292.455	207.966	68.3746	1.84091	0.0275405	1.56003
calcrla	ENSDARG00000011473	445508	both	3391.85	3779.21	1865.25	3.32808	1.84435e-09	8.73416	3374.41	3770.48	1878.86	3.32626	1.32466e-09	8.8779
calcrlb	ENSDARG00000011571	567131	both	54.4096	167.47	142.371	3.60014	2.6162e-05	4.58233	219.584	450.755	234.978	3.71748	1.45e-08	7.83863
cald1a	ENSDARG00000070314	322909	both	5640.14	5679.47	2127.87	2.41951	5.15546e-05	4.28773	10419.6	12090.1	5364.04	2.02973	2.45211e-05	4.61046
capgb	ENSDARG00000099672	336597	both	1033.78	1551.76	1366.95	1.56429	0.00789648	2.10257	981.329	1505.1	1257.71	1.62431	0.00864349	2.06331
capn2a	ENSDARG00000091699	541374	both	1646.86	1756.99	1063.94	2.08291	1.38607e-06	5.85821	78.7006	107.369	107.859	1.8035	0.0143572	1.84293
capns1b	ENSDARG00000013804	560033	both	3237.37	3538.17	2390.49	1.09394	0.0333234	1.47725	3219.92	3524.79	2398.89	1.09859	0.0262062	1.5816
capza1b	ENSDARG00000056090	474327	both	4490.73	5980.53	4198.02	1.04963	0.0455779	1.34125	5511.96	7307.84	5062.61	1.02763	0.0470701	1.32725
capzb	ENSDARG00000100252	335083	RefSeq	43.722	30.9772	450.2	0.0885025	0.973828	0.0115179	3320	3177.53	2874.62	1.13273	0.0038265	2.4172
carhsp1	ENSDARG00000053129	393534	both	2519.36	2124.84	1197.65	2.06835	1.54106e-05	4.81218	2487.33	2119.32	1214.37	2.05928	1.03081e-05	4.98682
casp2	ENSDARG00000062052	373118	Ens95	740.359	828.639	379.977	1.20049	0.0365143	1.43754	228.329	234.083	156.01	0.864295	0.181219	0.741797
casp8	ENSDARG00000058325	58022	Ens95	292.452	211.032	296.286	1.31846	0.0230392	1.63753	145.742	202.163	282.166	1.21101	0.0544617	1.26391
casp9	ENSDARG00000004325	492763	both	415.845	702.794	312.639	1.4	0.0127878	1.8932	413.907	676.133	294.685	1.39698	0.011903	1.92434
cast	ENSDARG00000058693	563084	both	4437.3	4408.44	2298.14	2.48511	9.4749e-08	7.02343	4401.41	4406.95	2312.22	2.48649	5.39444e-08	7.26805
castor1	ENSDARG00000079588	449937	both	1694.47	1028.05	461.744	2.5587	1.62357e-05	4.78953	245.818	142.191	64.5225	2.42502	0.00186116	2.73022
cav1	ENSDARG00000103747	323695	both	10759.5	11706.5	6261.44	4.93927	5.06679e-29	28.2953	670.413	939.234	121.341	4.53553	2.65082e-07	6.57662
cav2	ENSDARG00000052000	415240	both	2261.88	2414.28	1244.78	3.80896	1.16667e-14	13.9331	2249.28	2408.54	1253.86	3.80694	5.82886e-15	14.2344
cavin1b	ENSDARG00000059362	561082	both	538.266	740.548	324.183	3.07846	4.96686e-09	8.30392	365.326	537.811	234.015	3.25524	5.30185e-09	8.27557
cavin2b	ENSDARG00000071196	447845	both	16397.7	18293	11601.3	2.94747	2.88107e-11	10.5404	16310.5	18250.7	11690.1	2.94729	1.37092e-11	10.863
cbl	ENSDARG00000009958	492364	both	1059.04	929.315	571.408	1.21759	0.0208668	1.68055	1053.23	926.66	584.555	1.2242	0.0149892	1.82422
cblb	ENSDARG00000015199	556277	RefSeq	2422.2	1786.03	1572.82	0.88211	0.0465619	1.33197	2202.65	1539.92	1281.78	1.08194	0.0127298	1.89518
cc2d1b	ENSDARG00000099445	563720	both	657.773	705.699	623.354	1.06298	0.00813536	2.08962	283.711	411.096	414.1	1.1166	0.031086	1.50743
ccdc141	ENSDARG00000095675	553274	Ens95	174.888	326.228	153.915	1.61237	0.0217151	1.66324	40.8077	139.289	62.5965	0.575214	0.677056	0.169376
ccdc187	ENSDARG00000053857	100037381	both	2924.52	2533.35	1906.62	2.29451	3.73267e-07	6.42798	2884.72	2490.76	1869.23	2.25057	2.31632e-07	6.6352
ccdc80	ENSDARG00000000002	368419	both	1517.64	2147.1	1165.9	1.68028	0.00940935	2.02644	1509.89	2147.37	1176.81	1.67536	0.00795111	2.09957
ccdc84	ENSDARG00000059606	767736	both	1711.96	1248.77	370.357	1.5683	0.026752	1.57264	1527.38	872.492	299.5	1.47469	0.0437668	1.35886
ccdc85b	ENSDARG00000061543	564324	both	3633.78	4659.16	2650.22	1.81705	7.89822e-06	5.10247	3540.56	4703.91	2668.54	1.81038	5.47074e-06	5.26195
ccdc88b	ENSDARG00000076189	100330741	both	183.632	193.607	341.498	1.76766	0.00286982	2.54215	182.663	199.261	345.725	1.78563	0.00232766	2.63308
ccl38.1	ENSDARG00000041919	794050	both	883.184	957.388	296.286	4.76936	1.84089e-11	10.735	290.512	434.311	98.2284	4.77771	3.32592e-09	8.47809
ccm2l	ENSDARG00000063089	568661	both	3014.87	3238.08	1759.44	5.54643	8.70771e-28	27.0601	2937.19	3203.65	1762.33	5.79457	2.57823e-28	27.5887
ccng1	ENSDARG00000076667	171473	both	9168.02	7026.01	9575.42	1.02881	0.0461794	1.33555	9067.09	6980.9	9490.59	1.04472	0.0336548	1.47295
ccnl1b	ENSDARG00000012140	326088	both	4176.91	4420.05	3165.83	1.27043	0.000663878	3.17791	4143.93	4394.38	3156.79	1.28592	0.000323413	3.49024
ccny	ENSDARG00000063677	557738	both	519.806	454.009	170.268	2.23475	0.000307812	3.51171	510.097	466.232	178.159	2.21373	0.000238749	3.62206
ccr9a	ENSDARG00000055186	553366	both	1692.53	689.242	4463.52	2.58234	0.0066263	2.17873	1669.23	687.74	4489.61	2.58689	0.006112	2.21382
cct4	ENSDARG00000013475	393555	both	8497.61	7134.43	9186.78	1.03158	0.0392504	1.40616	8452.06	7119.22	9253.69	1.03396	0.0310305	1.50821
cd22	ENSDARG00000053005	554810	both	5906.35	4805.33	940.803	7.46786	3.86252e-18	17.4131	237.073	88.023	19.2605	2.6421	0.0286042	1.54357
cd276	ENSDARG00000003061	791140	both	678.177	771.525	409.798	2.3248	3.04246e-06	5.51678	704.419	772.861	389.061	2.47256	1.28661e-06	5.89055
cd302	ENSDARG00000086100	100333685	RefSeq	36.9208	17.4247	50.9842	1.76457	0.178868	0.747468	2868.2	2322.45	759.825	2.50959	0.000156897	3.80439
cd63	ENSDARG00000025147	321461	both	15946.9	17411.1	10760.6	1.75136	0.000300813	3.5217	15862.5	17365.7	10821.5	1.75679	0.00022	3.65758
cd7al	ENSDARG00000098787	100001623	Ens95	393.498	186.831	222.214	1.71324	0.0255853	1.59201	72.871	22.2476	83.783	1.02336	0.45923	0.33797
cd81b	ENSDARG00000022437	445280	both	1549.7	2660.16	1494.9	1.10862	0.0392797	1.40583	1524.46	2648.43	1501.35	1.1075	0.0330705	1.48056
cd99	ENSDARG00000051975	559896	both	1893.65	2919.6	646.442	1.69916	0.0122758	1.91095	1865.5	2839.95	634.632	1.73204	0.00890966	2.05014
cdc37	ENSDARG00000099301	394013	RefSeq	374.066	85.1872	365.547	1.25842	0.147201	0.83209	964.811	496.218	773.308	1.4244	0.0097034	2.01308
cdc42	ENSDARG00000044573	336839	both	4639.39	5871.14	6152.74	1.05986	0.0074636	2.12705	4614.19	5856.91	6198.02	1.06219	0.00531517	2.27448
cdc42bpb	ENSDARG00000019383	567039	both	4609.27	4944.73	3014.8	1.52183	0.000149648	3.82493	4596.7	4932.19	3033.52	1.52055	8.94009e-05	4.04866
cdc42ep1a	ENSDARG00000079549	101883603	both	131.166	135.525	36.5547	1.94999	0.0440113	1.35644	130.196	134.453	37.5579	1.92762	0.0420211	1.37653
cdc42ep5	ENSDARG00000062390	558275	both	2799.18	3604.97	1636.31	3.22294	1.19873e-11	10.9213	4611.27	6821.3	2915.07	3.02708	1.53953e-10	9.81261
cdc42l	ENSDARG00000040158	793158	both	6494.17	7936.93	4783.86	1.73804	0.000138031	3.86002	1716.84	2557.5	1262.52	1.91934	0.000347641	3.45887
cdc42se1	ENSDARG00000023724	791998	both	164.2	356.237	265.503	2.1884	0.000329775	3.48178	163.231	354.994	266.757	2.18692	0.000316006	3.50031
cdh5	ENSDARG00000075549	445471	both	26332.3	26276.4	19759.8	7.01822	2.01775e-48	47.6951	2051.07	3285.87	2230.36	6.47082	2.26829e-31	30.6443
cdk17	ENSDARG00000079470	798487	RefSeq	137.967	78.411	30.7829	1.27952	0.293259	0.532748	2212.36	1934.57	1388.68	1.24083	0.00256713	2.59055
cdkl1	ENSDARG00000017329	445316	both	83.5576	57.1142	15.3915	2.68599	0.0398509	1.39956	83.5587	57.0699	15.4084	2.68576	0.0386415	1.41295
cdkn1bb	ENSDARG00000054271	368329	both	5412.78	5880.82	4040.26	1.20118	0.0112063	1.95054	5384.68	5868.52	4034.1	1.20694	0.00820243	2.08606
cebpb	ENSDARG00000042725	140814	both	17498.5	19947.4	14236.1	2.12856	0.0273408	1.56319	17595.9	20012.2	14382.7	2.13427	0.0238946	1.6217
celsr1a	ENSDARG00000069185	368436	both	1024.07	1045.48	733.98	1.19048	0.00857703	2.06666	928.862	1038.86	743.454	1.15716	0.00901681	2.04495
cemip2	ENSDARG00000061600	566851	both	1483.63	1315.56	1244.78	1.49609	0.000477801	3.32075	1475.88	1303.9	1242.3	1.54421	0.000294705	3.53061
cerkl	ENSDARG00000079397	100037318	both	341.032	400.767	86.577	2.09531	0.0099954	2.0002	339.093	399.489	87.6351	2.09144	0.00911587	2.0402
cers2a	ENSDARG00000013704	259251	both	614.051	453.041	215.481	1.69382	0.0176646	1.7529	421.68	392.718	178.159	1.97282	0.00238861	2.62186
cers2b	ENSDARG00000058992	565295	both	1569.13	1160.68	1517.02	1.19926	0.0253936	1.59528	482.892	301.793	297.574	1.71756	0.0234323	1.63018
cfd	ENSDARG00000039579	553553	both	7483.26	6943.73	2672.34	3.72141	3.72441e-07	6.42894	7442.55	6930.6	2692.61	3.7233	3.2621e-07	6.4865
cfl1	ENSDARG00000021124	321496	both	5266.07	5349.37	9015.55	1.38524	0.0139588	1.85515	5237.96	5328.78	9077.46	1.3875	0.0118714	1.9255
cflara	ENSDARG00000055966	373114	both	869.582	656.329	383.825	2.06772	0.000334069	3.47616	1500.17	1360	625.965	1.96911	0.000122281	3.91264
cgas	ENSDARG00000021572	557043	both	114.649	63.8904	128.904	1.59723	0.0430955	1.36557	148.657	129.616	167.566	1.74939	0.00306839	2.51309
cgnl1	ENSDARG00000015805	553350	both	3242.23	4429.73	1626.69	3.11211	1.71943e-09	8.76462	3102.36	4197.05	1620.77	3.10362	4.35575e-10	9.36094
ch25h	ENSDARG00000045190	494109	both	4905.61	5202.23	2840.69	5.49122	2.74405e-16	15.5616	4878.47	5190.45	2861.14	5.48969	2.20837e-16	15.6559
chac1	ENSDARG00000070426	563855	both	21275.1	22032.5	13957.2	2.08432	3.5604e-07	6.4485	21332.7	22071.5	14175.7	2.07195	1.97954e-07	6.70344
chad	ENSDARG00000045071	394038	both	331.316	199.416	258.769	2.22658	0.00029218	3.53435	329.377	199.261	260.979	2.22695	0.000273152	3.5636
chka	ENSDARG00000041078	558499	both	2497.01	2706.63	758.03	1.54704	0.0170657	1.76788	2483.44	2700.66	763.677	1.5452	0.0143347	1.84361
chmp1b	ENSDARG00000099624	336426	both	2168.61	3258.41	2026.86	1.12433	0.0264748	1.57717	2207.5	3299.41	2096.5	1.12038	0.0207372	1.68325
chmp2a	ENSDARG00000053979	798901	both	3552.17	3567.21	1803.69	1.71461	0.000169737	3.77022	3750.43	3792.73	1876.93	1.71932	0.000136151	3.86598
chmp3	ENSDARG00000038064	406621	both	503.289	476.274	464.63	1.16048	0.00471105	2.32688	500.381	474.937	468.029	1.16837	0.00314434	2.50247
chmp4ba	ENSDARG00000016255	393164	both	2558.22	2065.79	1971.07	1.29055	0.00440074	2.35647	2675.82	2151.24	1986.72	1.32343	0.00284205	2.54637
chmp5b	ENSDARG00000103718	393351	both	2628.18	2850.87	1654.58	1.54558	0.00428934	2.36761	2603.92	2819.64	1659.29	1.55799	0.00321374	2.49299
chrng	ENSDARG00000086647	100536659	both	509.118	400.767	233.758	3.0746	1.51855e-06	5.81857	506.21	399.489	235.941	3.07218	1.43167e-06	5.84416
chst15	ENSDARG00000074527	565523	both	147.683	217.808	251.073	1.5721	0.00699431	2.15525	109.792	199.261	243.645	1.67221	0.00869816	2.06057
chst6	ENSDARG00000061357	100170782	RefSeq	2.9148	20.3288	4.80983	-0.638043	0.824033	0.0840553	713.164	531.04	684.709	1.30543	0.00137574	2.86147
cib1	ENSDARG00000103118	550376	both	1111.51	1060.97	553.131	1.20931	0.0354463	1.45043	1000.76	741.908	266.757	1.49043	0.0320893	1.49364
cidea	ENSDARG00000098245	100536460	both	25.2616	49.3699	76.9573	2.43313	0.0223648	1.65043	25.2619	49.3316	78.0049	2.44277	0.021513	1.6673
cirbpa	ENSDARG00000103672	550495	both	32255.2	22000.6	15378	1.29009	0.0137259	1.86246	32083.6	21951.6	15489.3	1.28947	0.0107061	1.97037
cited1	ENSDARG00000077769	793303	Ens95	1025.04	710.539	594.495	2.0837	1.85587e-05	4.73145	0	7.73828	8.66721	-0.72958	1	0
ckba	ENSDARG00000069752	564694	both	1431.17	2514.96	1007.18	1.89812	0.000513492	3.28947	1473.94	2571.05	1021.77	1.8957	0.000480872	3.31797
cldn5a	ENSDARG00000043716	406559	both	884.156	1269.1	556.017	2.52044	2.22355e-05	4.65295	864.735	1258.44	559.516	2.50637	2.05363e-05	4.68748
cldn5b	ENSDARG00000014059	450023	both	7616.37	8709.42	4808.87	5.33684	9.70247e-14	13.0131	7575.66	8689.13	4844.01	5.33527	9.2744e-14	13.0327
clec14a	ENSDARG00000103533	327325	both	15958.5	18837	8896.27	7.42476	9.96582e-27	26.0015	15873.2	18792.4	8960.93	7.42247	7.92966e-27	26.1007
clic1	ENSDARG00000103340	324481	both	1510.84	1886.7	1765.21	2.12755	9.43704e-07	6.02516	1486.57	1872.66	1775.81	2.12457	8.50727e-07	6.07021
clic2	ENSDARG00000010625	436834	both	7568.76	7748.16	5512.07	4.6253	9.24288e-30	29.0342	7528.06	7720.87	5551.83	4.62516	9.02802e-31	30.0444
cltca	ENSDARG00000043493	323579	both	6397.01	7258.34	5571.71	1.38753	0.000651328	3.1862	6472.88	7359.11	5629.83	1.39789	0.000403869	3.39376
cmip	ENSDARG00000062933	561893	both	8260.54	6055.07	5009.92	1.62278	5.5512e-05	4.25561	8216.93	6040.7	5046.24	1.62373	3.12166e-05	4.50561
cmtm6	ENSDARG00000099631	368348	both	2491.18	2728.89	1261.14	1.95545	0.000327245	3.48513	2085.08	2340.83	1127.7	1.83758	0.000697529	3.15644
cmtm7	ENSDARG00000010032	559138	both	805.456	1078.39	938.879	1.82692	1.60744e-05	4.79386	800.609	1075.62	945.689	1.8266	1.10552e-05	4.95643
cmtm8b	ENSDARG00000063162	791163	both	59.2676	145.205	48.0983	2.7031	0.0108574	1.96428	59.2684	145.093	49.1142	2.70859	0.010338	1.98556
cnn2	ENSDARG00000035858	406658	both	7222.87	9861.39	7314.79	1.76627	0.00109816	2.95934	7149.13	9802.47	7368.09	1.76577	0.000870459	3.06025
cobll1a	ENSDARG00000089858	100536063	both	345.89	234.265	191.431	3.93717	7.82167e-12	11.1067	343.951	236.018	206.087	3.55518	8.0701e-10	9.09312
col4a1	ENSDARG00000055009	554269	both	7905.91	5971.82	2293.33	2.96648	1.57569e-07	6.80253	5468.24	4821.92	1852.86	2.9065	1.11265e-07	6.95364
col4a2	ENSDARG00000104110	553355	both	910.389	1131.63	423.265	2.70227	8.58073e-06	5.06648	9908.51	12405.4	5135.8	2.81065	8.48896e-08	7.07115
copz1	ENSDARG00000017844	57970	both	1856.73	2254.56	1216.89	1.24243	0.0348372	1.45796	1847.04	2249.91	1225.93	1.24224	0.0287737	1.541
coro1ca	ENSDARG00000035598	317741	both	5825.71	7058.92	3810.35	1.99817	1.89003e-05	4.72353	742.312	894.739	446.843	2.15872	2.24013e-05	4.64973
coro2bb	ENSDARG00000063604	796974	both	23.3184	66.7945	75.9954	2.51304	0.0481141	1.31773	23.3187	76.4156	95.3393	3.32861	0.0245456	1.61003
cpb1	ENSDARG00000045442	322412	both	2095.74	2327.16	551.207	5.59826	5.62469e-14	13.2499	2082.17	2322.45	554.701	5.59371	5.69486e-14	13.2445
cpda	ENSDARG00000055648	563008	both	1381.61	1310.72	562.75	1.26916	0.0266437	1.57441	1326.25	1281.65	566.258	1.2537	0.0218957	1.65964
cpm	ENSDARG00000011769	550253	both	1173.69	1221.66	746.486	3.08974	7.37034e-13	12.1325	1129.01	1153.97	729.008	3.07102	5.9527e-13	12.2253
cpn1	ENSDARG00000005185	337172	both	12028.4	14812.9	9535.01	3.53131	7.85762e-20	19.1047	11964.4	14776.3	9586.89	3.54341	8.06484e-21	20.0934
CR318588.3	ENSDARG00000094719	101884954	both	3435.58	2644.68	2801.25	3.50964	5.47329e-06	5.26175	3417.16	2638.76	2821.66	3.518	5.06579e-06	5.29535
CR318588.4	ENSDARG00000095556	795545	both	249574	138734	71298.1	3.58579	1.23873e-08	7.90702	248241	138415	71819.4	3.58396	9.25935e-09	8.03342
CR457444.7	ENSDARG00000117340	101885221	Ens95	355.606	275.89	76.9573	1.67468	0.0467144	1.33055	132.139	50.2989	31.7798	1.50195	0.192915	0.714633
CR855337.1	ENSDARG00000094295	100536987	both	988.117	961.26	593.533	3.2288	2.38395e-11	10.6227	1091.12	1082.39	644.262	3.08844	2.36583e-10	9.62602
creb3l3b	ENSDARG00000090903	100538072	RefSeq	81.6144	34.8493	45.2124	1.76832	0.089028	1.05047	81.6155	36.7569	45.2621	2.00824	0.0480257	1.31853
crema	ENSDARG00000023217	555432	both	1266.97	1083.23	1078.36	2.22161	0.00355672	2.44895	4073	3940.72	2313.18	2.37941	0.00290094	2.53746
cremb	ENSDARG00000102899	550357	both	3647.39	2540.13	1996.08	3.39202	3.0361e-07	6.51768	3651.32	2589.42	2024.27	3.23588	4.9883e-07	6.30205
crfb4	ENSDARG00000068711	797527	both	448.879	437.552	331.878	1.29251	0.0179508	1.74592	445.97	437.213	322.613	1.27765	0.0177811	1.75004
crim1	ENSDARG00000029668	404210	both	637.369	787.982	404.026	1.45713	0.00552073	2.258	451.8	588.11	324.539	1.52152	0.0055185	2.25818
crip2	ENSDARG00000070670	554826	both	12596.8	11635.8	7680.34	3.88536	6.97016e-23	22.1568	12529.9	11609.4	7729.22	3.88737	7.16385e-24	23.1449
crip3	ENSDARG00000043395	556515	both	856.951	813.151	601.229	1.72552	0.00254511	2.59429	804.495	788.338	582.629	1.72779	0.00194731	2.71056
crybg1a	ENSDARG00000031782	556848	both	3044.02	2381.37	1787.33	2.0452	2.92643e-06	5.53366	2814.76	2198.64	1746.92	2.00898	2.00994e-06	5.69682
crybgx	ENSDARG00000036140	553474	both	25.2616	152.95	7.69573	3.77694	0.0135455	1.86821	25.2619	152.831	7.70418	3.77596	0.0136825	1.86383
crygm2d10	ENSDARG00000087765	100126134	RefSeq	274.963	496.603	32.7069	2.51749	0.0500111	1.30093	278.853	510.727	34.6688	2.57385	0.0368437	1.43364
crygm2d13	ENSDARG00000057460	436681	both	96.1884	419.16	18.2774	2.5822	0.0470899	1.32707	95.218	416.9	18.2974	2.57401	0.0452021	1.34484
crygm2d15	ENSDARG00000069826	436855	both	42.7504	234.265	11.5436	3.41052	0.0210976	1.67577	42.751	231.181	11.5563	3.3957	0.021434	1.6689
crygm2d18	ENSDARG00000073750	415232	both	210.837	272.986	23.0872	2.72701	0.0135353	1.86853	200.152	266.971	21.1865	3.30561	0.00291636	2.53516
crygm2d3	ENSDARG00000088823	790908	both	163.229	297.187	20.2013	2.43235	0.0422362	1.37432	164.203	277.611	20.2235	3.17216	0.0186751	1.72874
crygm2d4	ENSDARG00000087164	790917	both	174.888	269.114	13.4675	3.1016	0.0129096	1.88909	179.748	279.546	13.4823	3.25833	0.00765555	2.11602
crygm2d6	ENSDARG00000073874	415228	Ens95	85.5008	82.2831	3.84787	3.76739	0.0424514	1.37211	83.5587	80.2847	2.88907	3.72638	0.051747	1.28612
crygm2d7	ENSDARG00000076572	566558	both	165.172	299.123	23.0872	2.56628	0.0191483	1.71787	165.174	282.447	23.1126	2.6783	0.0142297	1.8468
crygs4	ENSDARG00000010701	503586	RefSeq	40.8072	36.7854	19.2393	2.12008	0.0810078	1.09147	40.8077	36.7569	19.2605	2.83501	0.0457794	1.33933
csf1rb	ENSDARG00000053624	568405	both	226.383	57.1142	82.7291	2.54128	0.00452632	2.34426	225.414	68.6773	100.154	2.27709	0.00429565	2.36697
csf3b	ENSDARG00000098752	100190920	RefSeq	109.791	151.982	205.861	0.332723	0.877208	0.0568975	4097.29	3353.58	2160.06	1.16874	0.0486696	1.31274
csgalnact1a	ENSDARG00000040535	793671	RefSeq	26.2332	30.9772	9.61967	0.522036	0.805552	0.0939062	225.414	296.957	173.344	1.27453	0.0197249	1.70499
csrnp1b	ENSDARG00000038429	322795	both	234.156	398.831	184.698	1.83087	0.018	1.74473	13041	13401.7	11075.7	1.90629	9.30419e-05	4.03132
csrp1a	ENSDARG00000006603	378726	both	5021.23	5736.58	2974.4	3.5829	2.5244e-12	11.5978	4994.09	5723.43	2995.96	3.5861	1.79452e-12	11.7461
csrp2	ENSDARG00000011961	393871	both	1198.95	960.292	424.227	1.34861	0.025579	1.59212	298.285	248.592	113.637	2.30464	0.000626868	3.20282
CT027815.1	ENSDARG00000046054	568883	Ens95	986.174	1121.95	518.5	1.7294	0.000451042	3.34578	101.048	67.71	74.1528	1.08769	0.162199	0.789952
CT030188.1	ENSDARG00000099385	100002400	Ens95	1604.11	2651.45	1380.42	1.81223	0.000160803	3.79371						#NUM!
ctnnb2	ENSDARG00000023472	324004	both	3316.07	3745.33	3402.48	1.24373	0.0023335	2.63199	3303.48318083621	3751.13361931753	3432.21412536287	1.24649	0.00159241	2.79795
ctnnd1	ENSDARG00000078233	556726	both	2625.26	3103.52	2601.16	1.18959	0.00132491	2.87781	2611.6949382611	3100.15039966805	2625.2008153028	1.19628	0.000786108	3.10452
ctsh	ENSDARG00000041108	324818	both	352.691	556.621	645.48	1.53586	0.00385099	2.41443	349.78057208854	555.221943653498	643.299392744781	1.54567	0.00328947	2.48287
ctsla	ENSDARG00000007836	321453	both	39789.9	43776.5	24583.1	1.88638	0.00046299	3.33443	39507.7156174005	43639.0905713024	24730.4317450389	1.88685	0.000346281	3.46057
cttnbp2nlb	ENSDARG00000056091	556247	both	203.064	269.114	101.968	2.00138	0.00262476	2.58091	2288.1479090792	2279.89219719738	1684.32730226141	1.89821	1.11086e-07	6.95434
CU459094.2	ENSDARG00000113503	100331538	both	290.508	676.657	318.411	2.5746	2.23985e-05	4.64978	251.647689363699	493.315664221749	254.238083360213	4.25456	7.55907e-11	10.1215
CU467961.1	ENSDARG00000078270	100149322	Ens95	1145.52	877.041	405.95	1.5428	0.0152737	1.81606	3491.97604468392	3325.52794822426	2399.85342323352	0.840359	0.0676896	1.16948
CU550719.2	ENSDARG00000104707	103911926	Ens95	18.4604	32.9132	29.821	4.06387	0.0403372	1.39429	47.6090223120512	30.9531397158744	30.8167373769955	1.96437	0.166908	0.777523
CU570791.1	ENSDARG00000098597	108179119	Ens95	677.205	503.379	253.959	2.56609	7.89822e-06	5.10247	0	0	17.33441477456	0.844061	1	0
CU927890.1	ENSDARG00000107130	101883074	both	890.957	859.616	235.682	5.54279	7.32125e-12	11.1354	868.621754019873	860.884198347758	238.829714671715	5.37421	6.17364e-11	10.2095
CU929259.1	ENSDARG00000101687	100001114	both	911.361	959.324	509.842	1.179	0.0332698	1.47795	1008.53398285529	1087.22903252009	628.854047099314	1.06738	0.0272877	1.56403
cuedc1b	ENSDARG00000054748	556847	RefSeq	118.535	123.909	77.9193	1.28096	0.124519	0.904765	2599.0639731579	2559.43774025637	1398.30945848117	1.23389	0.00833626	2.07903
cwc25	ENSDARG00000003382	406771	both	1097.91	1026.12	744.562	1.14358	0.0110419	1.95696	1092.09267507644	1023.3881818561	750.194950521234	1.14334	0.00816013	2.0883
cx39.4	ENSDARG00000070357	557275	both	447.907	475.306	648.365	4.55551	1.18714e-21	20.9255	444.998616712642	473.969951899327	652.929623175092	4.55589	1.17107e-21	20.9314
cxcl20	ENSDARG00000075163	567537	both	511.061	683.434	168.344	3.9335	7.01889e-07	6.15373	442.083778611904	674.19807443639	154.083686884978	5.22738	2.38981e-09	8.62164
cxcr4a	ENSDARG00000057633	140747	both	4359.57	3826.65	2088.43	4.94356	2.99565e-22	21.5235	4336.30748119764	3817.87632682989	2103.24232597994	4.96665	6.57106e-22	21.1824
cxcr4b	ENSDARG00000041959	114447	both	3068.31	2706.63	3500.6	3.26346	1.30373e-08	7.88481	3051.83549147251	2700.66144021005	3526.59038357992	3.26602	1.01458e-08	7.99372
cyb5a	ENSDARG00000098589	406409	both	1171.75	716.347	677.224	1.17085	0.02088	1.68027	1165.93524029513	714.824070313476	682.783337509057	1.17116	0.016581	1.78039
cyb5r1	ENSDARG00000018966	336553	both	1609.94	1463.67	975.434	1.79699	0.00013033	3.88496	1601.21773000531	1459.6339947267	982.283503891732	1.79858	9.42366e-05	4.02578
cyfip1	ENSDARG00000044345	336613	both	2874.96	3257.44	3138.9	1.33034	0.00123442	2.90854	978.413989147665	1045.63575102688	1942.41747779375	1.19439	0.0207806	1.68234
cyp1a	ENSDARG00000098315	140634	both	10128.9	7808.18	7058.91	4.82521	1.09053e-30	29.9624	10075.6237015504	7789.55106662303	7109.99912669868	4.82552	9.00533e-32	31.0455
cyp1b1	ENSDARG00000068934	100150054	both	1033.78	914.794	983.13	1.98679	1.106e-05	4.95624	1027.96623686021	912.150336002175	990.950711279012	1.99054	7.27371e-06	5.13824
cyp2aa1	ENSDARG00000099003	572000	both	383.782	395.927	235.682	1.55149	0.00886385	2.05238	381.843791196656	395.61981699352	237.866691628684	1.55149	0.00757315	2.12072
cyp2aa6	ENSDARG00000103590	324212	both	1193.12	1357.19	835.949	2.09974	0.000435544	3.36097	1197.026846703	1372.57828927581	889.833291760745	2.06162	0.00052859	3.27688
cyr61l1	ENSDARG00000035422	550346	both	296.338	425.936	177.002	3.22789	9.62806e-07	6.01646	295.370260874767	425.605671093274	178.159262960755	3.24244	7.77496e-07	6.1093
cyr61l2	ENSDARG00000099985	553273	both	2189.99	2407.51	1403.51	5.15355	1.21449e-28	27.9156	2178.3556739514	2401.77018482863	1413.71782716967	5.11903	5.23244e-29	28.2813
cyt1l	ENSDARG00000036832	792062	both	509.118	1685.35	2350.08	1.72539	0.0426715	1.36986	480.948286621742	1568.93726934839	2181.24719246546	1.73166	0.0376635	1.42408
cyth1a	ENSDARG00000076742	321938	both	4481.02	4590.43	2434.74	2.55423	3.01638e-09	8.52051	4491.765513237	4572.35910740433	2356.51738629712	2.5974	1.39999e-09	8.85387
cyth1b	ENSDARG00000021488	325586	Ens95	753.961	824.767	837.873	1.023	0.00887778	2.0517	694.703080675849	794.141490835404	825.310747877661	0.992668	0.00994905	2.00222
cyth3a	ENSDARG00000007807	100002190	both	751.047	1092.91	777.269	2.234	6.21133e-07	6.20682	747.17016648913	1067.88332019767	777.159595726105	2.29765	2.65082e-07	6.57662
dab2	ENSDARG00000031761	404040	both	2425.11	3374.58	2376.06	4.47554	4.24298e-16	15.3723	2412.51433471068	3367.12122971747	2393.11226193231	4.47112	1.40775e-16	15.8515
dab2ipb	ENSDARG00000075110	558237	both	1402.99	1242.96	945.613	1.5443	0.000579422	3.23701	1396.20745025342	1259.40587218964	988.061642149918	1.53159	0.000313342	3.50398
dbnlb	ENSDARG00000016016	553729	both	1265.99	1218.76	819.596	1.16706	0.0112538	1.9487	1259.21005951874	1215.87801946419	826.273770920692	1.17429	0.00802945	2.09531
dcbld1	ENSDARG00000015907	664747	Ens95	524.664	417.224	351.118	1.3518	0.0168087	1.77447	11.6593524029513	104.466846541076	62.5964977970221	1.1005	0.44316	0.35344
dchs1b	ENSDARG00000079850	553300	RefSeq	1965.55	1752.15	1337.13	0.96534	0.0376528	1.4242	1917.96347028549	1700.48811314085	1329.93482242596	1.00092	0.0211871	1.67393
dctn1a	ENSDARG00000019743	407638	RefSeq	170.03	195.543	79.8432	1.09667	0.151937	0.818336	210.83995595337	238.919547181906	115.562765163733	1.28256	0.0492972	1.30718
ddah2	ENSDARG00000105009	799954	both	981.316	1619.52	1011.99	1.11606	0.015162	1.81924	1162.04878949415	1804.95495968193	1198.96368857373	1.03632	0.0154362	1.81146
ddx21	ENSDARG00000063626	799650	both	4845.37	4331.96	3175.45	1.30503	0.0129632	1.88729	4819.19899321988	4321.83213282897	3198.19952590631	1.30573	0.0101201	1.99482
ddx3xa	ENSDARG00000020573	566947	both	5713.01	4231.29	4924.31	1.25264	0.000528549	3.27691	6562.2721774611	4680.69509640989	5244.62349234742	1.30156	0.000235042	3.62885
degs1	ENSDARG00000007347	327075	both	1637.15	1937.04	1979.73	1.5649	0.000105048	3.97861	1628.4228856122	1932.63666100991	1993.4576990744	1.56822	6.85398e-05	4.16406
dennd2c	ENSDARG00000073738	570947	RefSeq	163.229	172.31	264.541	0.790648	0.257699	0.588887	499.408927926415	401.423530690247	361.133641136666	1.18476	0.0115305	1.93815
dennd2db	ENSDARG00000030250	492474	both	696.637	726.027	356.89	4.82286	8.80406e-14	13.0553	692.759855275357	724.496926474686	359.207595050604	4.8204	9.29936e-14	13.0315
derl2	ENSDARG00000042401	554093	both	1036.7	845.096	937.917	1.08477	0.0179947	1.74486	894.855296926514	768.992064816256	911.019798707429	1.09773	0.0221004	1.6556
dgkh	ENSDARG00000018716	100137124	RefSeq	273.991	225.552	194.317	1.22419	0.0671588	1.1729	2554.36978894658	2143.50492532431	1944.34352387981	1.26843	0.00287505	2.54135
DGKI	ENSDARG00000063578	100331649	RefSeq	27.2048	32.9132	32.7069	1.6734	0.236849	0.625528	1309.73391993153	1182.99030851608	595.148240593226	1.70943	0.00376616	2.4241
dgkza	ENSDARG00000014439	553380	both	1370.93	1380.42	1080.29	1.66943	4.70746e-05	4.32721	1363.17261844506	1384.18571666926	1088.21603862515	1.65019	3.58176e-05	4.4459
DHDH	ENSDARG00000019081	449558	RefSeq	572.272	451.105	525.234	0.74625	0.198489	0.702263	438.19732781092	362.732106045404	428.545254148844	1.21859	0.0208615	1.68066
dip2a	ENSDARG00000078058	100332244	RefSeq	65.0972	127.781	50.9842	1.36116	0.134453	0.871429	4305.21587478977	3635.05934538301	2645.42429920646	2.20914	2.6905e-08	7.57017
dip2ba	ENSDARG00000005350	405899	both	2147.24	1938.98	1992.23	1.18308	0.00125658	2.90081	2136.57632784083	1934.57123224215	2006.94002167683	1.18511	0.00077176	3.11252
DIPK2B	ENSDARG00000061747	569232	both	256.502	149.078	92.3488	2.45143	0.000709174	3.14925	318.688965680669	320.171538936076	262.905290747493	2.24841	1.52613e-05	4.81641
disc1	ENSDARG00000021895	407621	both	161.286	74.5388	68.2996	1.81748	0.0354463	1.45043	160.316095540581	73.5137068252018	68.3746360552088	1.80835	0.0346867	1.45984
dlc	ENSDARG00000002336	30120	both	8339.24	8794.61	5132.09	2.51411	1.07059e-10	9.97038	8294.65762199962	8774.24782383429	5162.76653368978	2.52273	3.18398e-11	10.497
dlc1	ENSDARG00000079317	567965	RefSeq	38.864	72.6027	95.2347	0.441161	0.762743	0.117622	2537.8523730424	2148.34135340491	1802.77913655424	1.5535	4.23022e-05	4.37364
dll4	ENSDARG00000070425	563920	both	15226.9	13298.9	8824.12	4.40837	1.03748e-27	26.984	8710.50785770488	8333.16558288308	6061.2670328378	4.34451	5.65064e-32	31.2479
dnajb5	ENSDARG00000052881	569466	RefSeq	22.3468	8.71233	14.4295	0.744978	0.761325	0.11843	345.894121287556	343.386393722982	342.836203319075	1.09718	0.0153566	1.81371
dnajc7	ENSDARG00000058148	406579	both	2473.69	2602.08	1913.35	1.0187	0.015429	1.81166	2420.28723631264	2475.28389165383	1882.71004912582	1.01488	0.0115818	1.93622
dnase1l4.2	ENSDARG00000011376	393843	both	420.703	373.662	604.115	2.49654	8.6879e-07	6.06108	418.765073806002	372.404962206614	615.371724496879	2.47146	6.30598e-07	6.20025
dnmt3bb.1	ENSDARG00000036791	317744	both	1608	1336.86	1655.54	1.03148	0.0391786	1.40695	2169.61115964919	1751.75425079527	2184.13626159456	1.14289	0.0145411	1.8374
dock6	ENSDARG00000035706	553459	both	1700.3	2348.46	1845.05	2.6957	2.89981e-13	12.5376	6850.84114943415	7386.19296470054	4305.67602539209	3.17045	1.1469e-15	14.9405
DOCK9	ENSDARG00000114086	566175	both	133.109	135.525	79.8432	1.89015	0.00858225	2.0664	1710.03835243286	1608.59597960935	998.65489562326	2.88647	3.06552e-12	11.5135
dok1b	ENSDARG00000099177	406361	both	455.68	413.352	319.373	1.93031	0.000160803	3.79371	453.743131014855	412.063672467579	321.649696372391	1.93841	0.000118284	3.92707
dpyda.1	ENSDARG00000102671	768165	RefSeq	457.623	283.635	54.8321	1.78833	0.0875373	1.05781	657.781798066503	431.40938479	200.308792950471	1.47891	0.0418525	1.37828
dpyda.3	ENSDARG00000086853	768165	RefSeq	168.087	120.037	132.751	1.12049	0.104434	0.981156	657.781798066503	431.40938479	200.308792950471	1.47891	0.0418525	1.37828
dsc2l	ENSDARG00000039677	560091	both	1736.25	1467.54	1040.85	1.57874	0.00596156	2.22464	310.916064078702	112.205131470045	114.599742120702	1.50185	0.0479828	1.31891
dspa	ENSDARG00000022309	324023	both	6179.37	4228.38	2584.8	2.13565	9.58103e-05	4.01859	6195.97418946838	4305.38827735491	2641.57220703433	2.14615	5.75045e-05	4.2403
dtnba	ENSDARG00000077694	325242	both	918.162	1050.32	784.003	1.20377	0.0246731	1.60778	913.315938231187	1047.57032225913	789.67889528551	1.20078	0.0210957	1.67581
dtx2	ENSDARG00000032933	568626	both	454.709	519.836	262.617	1.33886	0.0122898	1.91045	383.787016597148	502.98852038296	260.0162216184	1.28192	0.0138368	1.85897
dub	ENSDARG00000059774	566846	both	380.867	183.927	292.438	1.46055	0.0347939	1.4585	363.383149891983	177.013267750157	294.685051167519	1.56416	0.0288073	1.5405
dusp1	ENSDARG00000100515	406340	both	7494.92	10430.6	6765.51	1.60053	0.00247796	2.60591	7452.26941088638	10382.8438034436	6811.46198335904	1.60413	0.0019061	2.71986
dusp10	ENSDARG00000052465	100034609	RefSeq	10.6876	12.5845	4.80983	-0.502754	0.858302	0.0663598	357.553473690507	281.480114291233	172.381124702569	1.43898	0.010071	1.99693
dusp22b	ENSDARG00000039850	100002272	both	197.235	173.279	187.583	1.45749	0.018626	1.72988	203.067054351402	173.144125285673	190.67856252016	1.44633	0.0197732	1.70392
dusp5	ENSDARG00000019307	114436	both	36530.2	30585.1	22063.7	4.25852	3.5604e-07	6.4485	36334.4285383973	30513.9920461555	22223.6827640289	4.25948	3.30373e-07	6.481
dusp6	ENSDARG00000070914	353314	both	6969.29	9933.99	6247.01	2.04111	7.0872e-08	7.14953	6931.48500355456	9910.80842277655	6292.39256316527	2.04171	3.03943e-08	7.51721
dysf	ENSDARG00000007370	560924	both	1476.83	1929.3	1001.41	4.36937	6.72051e-17	16.1726	1445.75969796596	1862.02481103307	1017.91535648388	4.26582	3.54255e-16	15.4507
ece1	ENSDARG00000061737	777750	both	2897.31	3089	2014.36	3.16097	5.97401e-12	11.2237	686.930179073882	884.099053134664	1161.40578989552	2.76192	9.95231e-09	8.00208
ece2b	ENSDARG00000102142	793465	RefSeq	185.576	229.425	201.051	0.796621	0.19903	0.70108	605.314712253223	807.683489461099	534.477788882266	1.90486	3.23476e-06	5.49016
ecscr	ENSDARG00000087457	550161	both	2014.13	2840.22	1359.26	6.41906	6.47794e-33	32.1886	2515.50528093675	3236.53767154112	1486.90757844003	6.23903	1.31261e-28	27.8819
edem1	ENSDARG00000025094	394164	both	942.452	955.452	683.958	1.45837	0.000988312	3.00511	936.634643037089	953.743617495381	680.857291422994	1.45977	0.000720787	3.14219
edf1	ENSDARG00000009950	793036	both	4373.17	5528.46	3254.33	1.1528	0.0343764	1.46374	4348.93844630084	5515.46258312238	3277.16741543487	1.15561	0.0276194	1.55879
edn1	ENSDARG00000036912	58032	both	1724.59	1726.98	1004.29	4.14129	2.93987e-15	14.5317	1714.89641593409	1722.73568231164	1011.17419518266	4.16131	1.7686e-15	14.7524
edn2	ENSDARG00000070578	569550	both	1914.05	1495.62	1278.45	4.37138	2.38267e-23	22.6229	1904.36089248205	1492.52170567482	1287.56180853259	4.37655	1.03279e-23	22.986
ednraa	ENSDARG00000011876	114550	both	5791.71	6929.2	3459.23	3.5666	1.76449e-15	14.7534	5975.41810651255	7278.8242613111	3573.77851268845	3.58708	7.63171e-16	15.1174
eef1a1l1	ENSDARG00000020850	30516	both	294829	289178	277715	1.11311	0.0450435	1.34637	297056.980522394	291618.234833798	280528.612434962	1.11947	0.0356906	1.44745
eef1db	ENSDARG00000030053	560745	both	5270.93	4868.26	4013.32	1.35295	0.000353985	3.45101	5244.7653559276	4858.67564977617	4044.69678073066	1.35316	0.000201891	3.69488
eepd1	ENSDARG00000071116	402965	both	322.571	249.753	196.241	1.78142	0.00159028	2.79853	268.16510526788	241.821404030269	183.937401218942	1.70441	0.00182223	2.7394
efemp2b	ENSDARG00000020811	572703	both	2790.43	2505.28	1225.55	3.73037	1.96081e-13	12.7076	2215.27695656075	2144.47221094043	1069.91860080756	3.80082	2.28161e-14	13.6418
efna1a	ENSDARG00000030326	393569	both	628.625	699.89	629.126	1.58766	0.0223807	1.65013	633.491480560355	698.380214839417	634.632185357501	1.59471	0.0192234	1.71617
efna1b	ENSDARG00000018787	494151	both	1960.69	1818.94	2085.54	1.35125	0.00717487	2.14419	1950.02668939361	1814.62781584314	2100.35325685085	1.35489	0.00566169	2.24705
efnb2a	ENSDARG00000020164	30219	Ens95	11029.6	12399.6	7664.95	2.04809	6.76181e-07	6.16994	37.8928953095918	111.237845853924	29.8537143339644	2.39882	0.070072	1.15446
efnb2b	ENSDARG00000074050	114402	both	513.976	714.411	560.827	2.01798	3.15318e-05	4.50125	157.401257439843	199.260836920942	181.048332089849	1.85839	0.00391681	2.40707
egfl7	ENSDARG00000100657	678640	both	17789	17161.4	7713.05	6.75802	3.21634e-37	36.4926	17796.0582177047	17153.8431162912	7779.3001416053	6.69094	1.81958e-37	36.74
egln1b	ENSDARG00000004632	436868	both	1014.35	893.498	713.779	1.64509	0.000206614	3.68484	1008.53398285529	891.837338063633	712.637051843021	1.64876	0.000136087	3.86618
egln2	ENSDARG00000062562	559569	both	410.015	522.74	380.939	1.58256	0.00052068	3.28343	407.10572140305	533.941660098834	404.469678073066	1.46312	0.0012061	2.91862
egln3	ENSDARG00000032553	406602	both	397.384	130.685	132.751	2.31502	0.00263535	2.57916	410.020559503788	133.485415024709	141.564387325573	2.20781	0.0033391	2.47637
ehbp1l1b	ENSDARG00000079895	100331563	both	914.275	678.594	388.634	2.16641	4.18344e-05	4.37847	283.710908471815	153.798412963251	127.119041680106	1.5076	0.0206441	1.6852
ehd1b	ENSDARG00000014793	447839	both	907.474	1470.45	1333.29	1.76292	0.000243079	3.61425	889.025620725038	1464.47042280731	1343.4171450284	1.75984	0.000221116	3.65538
ehd2b	ENSDARG00000040362	337401	both	3790.21	5895.34	3974.85	3.32072	4.94948e-14	13.3054	3770.82888965451	5882.06383163227	4004.24981292335	3.32064	2.36222e-14	13.6267
ehd4	ENSDARG00000054302	569546	both	1838.27	1968.02	1550.69	4.73959	2.46023e-30	29.609	9555.81090691885	9198.88620931144	6385.80579833929	5.1049	2.47778e-22	21.6059
eif1b	ENSDARG00000012688	322237	both	25057.6	19840.9	16376.5	1.05232	0.0415313	1.38162	24776.1238562716	19706.5098572347	16378.1328928301	1.05613	0.0318449	1.49696
eif2b2	ENSDARG00000041397	405839	both	762.706	822.831	838.835	1.00813	0.0415313	1.38162	758.829518892082	821.225488086794	840.719116566159	1.00973	0.0339895	1.46866
eif3g	ENSDARG00000016889	393974	RefSeq	5774.22	4260.33	3564.09	1.02031	0.0530014	1.27571	5743.20267115377	4251.22028285213	3590.14990441998	1.02108	0.0420845	1.37588
eif4a1a	ENSDARG00000092115	386634	RefSeq	586.846	744.42	782.079	0.51718	0.40291	0.394792	1630.36611101269	1211.04159138359	989.024665192949	1.20627	0.00901052	2.04525
eif4eb	ENSDARG00000013274	493617	both	296.338	273.954	246.263	1.1052	0.028766	1.54112	295.370260874767	273.741829362265	248.459945102026	1.10714	0.0233704	1.63133
eif4ebp2	ENSDARG00000031819	386945	both	6256.13	5422.94	4416.39	1.19903	0.00724111	2.14019	6222.20773237502	5410.02845096518	4448.20343576069	1.19944	0.0052384	2.2808
elk3	ENSDARG00000018688	557074	both	1761.51	2288.44	1731.54	2.74071	5.88624e-10	9.23016	5333.18211164998	5379.07531124931	3201.08859503541	3.07081	1.28137e-13	12.8923
elmo1	ENSDARG00000098753	406364	both	8269.29	7176.05	5476.48	2.02505	2.70458e-06	5.5679	8224.70150758191	7170.48827230554	5518.12203656826	2.02734	1.549e-06	5.80995
elmsan1a	ENSDARG00000011445	569908	RefSeq	0.9716	40.6575	87.539	0.0461283	0.990392	0.00419309	683.043728272898	610.357223772399	337.058065060888	1.20637	0.0307457	1.51221
emd	ENSDARG00000095774	558212	both	805.456	1112.27	900.401	1.13305	0.0350714	1.45505	811.296604705363	1103.67288799415	902.352591320149	1.17047	0.024387	1.61284
emid1	ENSDARG00000076119	797252	both	1013.38	1132.6	1106.26	1.18934	0.0253426	1.59615	5746.11750925451	7293.33354555292	3856.90728733959	1.47918	0.000470809	3.32716
emp2	ENSDARG00000044588	445506	both	6874.07	5675.6	2281.78	1.86806	0.000830589	3.08061	6837.2385716307	5662.48999677278	2298.73600371526	1.86661	0.000641894	3.19254
emp3b	ENSDARG00000101461	560722	both	290.508	286.539	164.496	3.17206	5.85286e-07	6.23263	303.143162476734	291.152970452444	166.602986444382	2.87727	2.66122e-06	5.57492
eno3	ENSDARG00000039007	378963	both	3611.44	3261.31	4440.44	1.38623	0.00479594	2.31913	3486.14636848244	3209.45367428973	4405.83042186733	1.40934	0.00370389	2.43134
enpp1	ENSDARG00000005789	562399	both	893.872	999.014	579.104	1.10312	0.0422877	1.37379	836.558534911757	949.874475030897	561.442434087137	1.08233	0.0385551	1.41392
entpd4	ENSDARG00000038422	436692	both	209.866	507.251	328.031	1.43077	0.0242322	1.61561	259.420590965667	518.465090240897	337.058065060888	1.48503	0.00873618	2.05868
entpd8	ENSDARG00000005565	436652	both	1038.64	1229.41	971.586	3.82698	1.97599e-13	12.7042	978.413989147665	1176.21930920323	936.058397826238	4.29346	1.75188e-12	11.7565
eogt	ENSDARG00000022853	798087	both	57.3244	101.644	56.756	2.79867	0.0011098	2.95475	91.3315938231187	108.335989005561	60.6704517109599	2.23536	0.0141446	1.84941
epas1a	ENSDARG00000008697	566886	both	10927.6	7633.94	5220.59	3.56467	3.08531e-08	7.5107	3575.53473690507	2741.28743608713	1554.31919145221	3.43668	4.17649e-07	6.37919
epas1b	ENSDARG00000057671	555192	both	13145.7	10054	7832.33	3.30758	1.3051e-08	7.88436	5876.31361108746	4450.48111977307	2950.70260384732	3.80595	2.1194e-08	7.67379
epb41l4a	ENSDARG00000040087	30470	both	816.144	776.365	583.914	2.15086	1.41998e-07	6.84772	1417.58292965883	1336.78872147933	911.019798707429	2.27845	2.28808e-08	7.64053
epha2a	ENSDARG00000017354	30689	both	1692.53	2153.88	2254.85	1.56177	0.0162605	1.78887	1682.83319682597	2148.34135340491	2269.84531242433	1.56489	0.0138953	1.85713
epha2b	ENSDARG00000022727	568718	both	320.628	302.027	126.98	1.92337	0.00830736	2.08054	479.00506122125	542.647230643924	248.459945102026	1.45272	0.016508	1.7823
ephb4a	ENSDARG00000100725	30688	both	729.671	580.822	521.386	1.56999	0.00024602	3.60903	5303.06211794236	5280.41217840496	2950.70260384732	2.15104	7.27939e-06	5.13791
ephb4b	ENSDARG00000027112	30691	both	2048.13	2479.14	967.738	2.18779	0.000271994	3.56544	290.512197373537	358.862963580919	303.352258554799	1.33387	0.0254691	1.59399
ephx2	ENSDARG00000040255	494099	RefSeq	54.4096	42.5936	69.2616	1.19457	0.205177	0.687871	249.704463963207	100.597704076592	123.266949507982	1.45868	0.0466858	1.33081
ephx5	ENSDARG00000103298	322331	RefSeq	129.223	154.886	121.208	0.969132	0.214821	0.667924	323.547029181899	241.821404030269	166.602986444382	1.27307	0.0487229	1.31227
epoa	ENSDARG00000055163	100004455	Ens95	158.371	96.8036	65.4137	2.18084	0.00353186	2.452	82.5870795209052	27.0839972513901	10.5932534733422	2.25274	0.154903	0.809941
eppk1	ENSDARG00000096359	101885652	both	6979	7432.58	3313.01	2.73557	5.2965e-06	5.27601	6762.42439371176	7169.52098668942	3149.08535071173	2.85295	3.28881e-06	5.48296
erfl3	ENSDARG00000062801	565909	Ens95	1181.47	1348.47	1047.58	1.21053	0.00166583	2.77837	219.584470255583	144.12555680204	85.7090508297687	1.63728	0.0670646	1.17351
erg	ENSDARG00000077304	494073	both	77.728	64.8584	50.9842	2.93902	0.0180418	1.74372	7065.5675561885	7127.92770519621	3326.28159062945	5.26939	7.04665e-22	21.152
ero1b	ENSDARG00000103915	767700	both	1539.01	1614.68	1770.02	1.11503	0.0128771	1.89018	857.934014317168	814.454488773947	991.913734322043	1.42641	0.000824085	3.08403
errfi1a	ENSDARG00000104039	798009	both	2747.68	2316.51	2797.4	2.48843	4.68393e-11	10.3294	752.02822999036	703.216642920023	426.619208062781	2.98653	4.37665e-08	7.35886
esama	ENSDARG00000077039	799432	both	4240.06	4815.01	2416.46	4.67628	1.0723e-22	21.9697	2389.19562990477	2971.50141272395	1603.4333666468	4.55831	3.20428e-21	20.4943
esm1	ENSDARG00000104370	767774	both	8040.96	8043.41	2266.39	7.31483	1.51985e-26	25.8182	8062.44218664084	8061.35832475305	2299.69902675829	7.24986	5.46971e-27	26.262
esr1	ENSDARG00000004111	259252	both	251.644	257.498	241.454	1.05907	0.0358171	1.44591	276.909619570094	253.428831423722	241.718783800808	1.18751	0.0126565	1.89769
esyt1b	ENSDARG00000014239	571083	RefSeq	47.6084	50.3379	56.756	-0.131574	0.932527	0.0303387	1082.37654807398	1031.12646678507	572.99871060351	1.64223	0.000900393	3.04557
esyt2a	ENSDARG00000030824	570012	both	1299.03	1303.95	771.497	1.14739	0.0160644	1.79414	1291.27327862686	1308.73743861182	777.159595726105	1.13863	0.0130359	1.88486
ets1	ENSDARG00000024431	280651	both	260.389	193.607	342.46	2.24945	3.34165e-05	4.47604	972.584312946189	791.239633987041	569.146618431386	2.91751	1.07541e-09	8.96842
ets2	ENSDARG00000103980	326672	Ens95	5026.09	4745.31	2933.04	1.76521	0.0160083	1.79565	759.801131592328	1007.91161199816	974.579319547483	1.19625	0.154589	0.810822
etv2	ENSDARG00000053868	555766	both	13948.3	13691.9	6264.33	7.44656	3.97333e-27	26.4008	13617.1519939469	13471.3867757182	6216.31374276581	7.83403	4.46174e-23	22.3505
eva1ba	ENSDARG00000102701	100004969	both	1970.4	2008.68	700.312	3.86337	2.19947e-10	9.65768	1283.50037702489	1467.37227965567	484.400590644648	4.19038	1.42818e-12	11.8452
eva1c	ENSDARG00000056024	564385	both	111.734	68.7306	37.5167	3.11224	0.00173817	2.75991	385.730241997639	384.979675216188	165.639963401351	3.80785	9.56466e-10	9.01933
exoc2	ENSDARG00000055610	100004870	both	967.713	1241.02	918.678	1.08706	0.0192558	1.71544	634.463093260601	1003.07518391756	845.534231781314	1.00881	0.0413231	1.38381
exoc3l1	ENSDARG00000051899	567832	both	2775.86	3663.05	1832.55	4.07267	3.06789e-16	15.5132	2760.35168139872	3668.91434194724	1854.78238087792	3.97852	1.02245e-16	15.9904
exoc3l2b	ENSDARG00000030782	565839	both	476.084	241.041	79.8432	3.02555	0.000282929	3.54832	232.21543535878	150.896556114888	47.1881291085244	2.50904	0.00713131	2.14683
exoc5	ENSDARG00000060323	559010	both	147.683	89.0594	48.0983	1.85909	0.0364949	1.43777	146.713517737137	88.022991067018	49.1141751945866	1.89006	0.0335984	1.47368
exoc6	ENSDARG00000020521	406591	both	2359.04	1824.75	1687.29	1.15651	0.0117035	1.93169	2032.61376891451	1683.07697205067	1666.99288748685	1.14524	0.00864303	2.06333
f2rl2	ENSDARG00000090524	100148468	both	4299.33	5307.74	2582.88	4.65188	2.14353e-13	12.6689	474.14699772002	887.968195599148	1377.12295153449	3.70172	3.31778e-07	6.47915
f8	ENSDARG00000101385	100302404	both	944.395	423.032	310.715	4.07039	1.49779e-08	7.82455	9869.64180909829	6603.65890125859	6112.30725411845	5.43582	5.24464e-11	10.2803
fabp11a	ENSDARG00000017299	447944	both	32592.3	33973.2	10514.3	4.76197	7.85655e-14	13.1048	32418.8293564061	33893.6879888825	10590.3644042131	4.7603	5.65216e-14	13.2478
fabp11b	ENSDARG00000002311	553579	both	91.3304	679.562	797.47	1.88223	0.0426715	1.36986	90.3599811228727	677.099931284754	801.235171801883	1.88923	0.0394035	1.40446
fam102aa	ENSDARG00000102566	796432	both	240.957	219.744	137.561	2.00432	0.000385783	3.41366	1618.70675860974	980.827614746772	398.691539814879	2.48416	0.000483506	3.3156
fam107b	ENSDARG00000026865	386641	both	2995.44	3160.64	2467.44	1.63015	5.24902e-06	5.27992	2979.93615165431	3153.35110855471	2485.56247406329	1.63134	2.42339e-06	5.61558
fam117bb	ENSDARG00000009839	100003476	RefSeq	181.689	136.493	101.006	1.39938	0.0517031	1.28648	149.628355837875	116.074273934529	95.3392812600798	1.39201	0.0467285	1.33042
fam129ab	ENSDARG00000023053	561414	both	886.099	757.005	523.31	3.2567	8.43858e-14	13.0737	666.526312368717	534.908945714955	498.845936290115	2.98312	1.84092e-13	12.735
fam129ba	ENSDARG00000062970	563073	both	1569.13	1556.6	901.363	2.58485	1.14683e-09	8.9405	1560.40999659498	1553.46069949045	908.130729578336	2.58512	5.23975e-10	9.28069
fam129bb	ENSDARG00000008026	556540	both	921.077	926.411	396.33	2.32963	8.19531e-06	5.08643	576.166331245844	531.039803250471	199.34576990744	2.53354	2.25244e-05	4.64735
fam167b	ENSDARG00000100426	556719	RefSeq	74.8132	90.0274	8.6577	2.0927	0.163477	0.786542	1515.71581238367	1136.56059894226	330.316903759671	2.55931	0.000268566	3.57095
fam169aa	ENSDARG00000059719	751650	both	218.61	451.105	229.91	1.64435	0.00619429	2.20801	217.641244855091	448.82052588018	234.977622499591	1.62326	0.00606219	2.21737
fam171a1	ENSDARG00000079788	795681	RefSeq	95.2168	118.1	38.4787	1.03207	0.344748	0.462499	3956.40691540148	4922.51650044016	3897.3542551469	1.89842	5.60639e-09	8.25132
fam174b	ENSDARG00000068709	798908	both	2392.08	2517.86	1620.91	4.1841	1.35207e-25	24.869	2399.88336960748	2512.04074506644	1632.32405793773	4.19098	1.63426e-26	25.7867
fam198b	ENSDARG00000077054	566369	both	983.259	1664.05	906.173	4.43968	3.40017e-19	18.4685	1011.44882095603	1727.57211039224	923.539098266834	4.17685	1.20076e-17	16.9205
fam210b	ENSDARG00000052638	619270	both	972.571	909.954	698.388	1.26619	0.0268508	1.57104	655.838572666012	591.978797066099	496.919890204052	1.3836	0.00715441	2.14543
fam43a	ENSDARG00000043009	334166	both	2048.13	2446.23	1341.94	2.96741	1.5874e-10	9.79931	2036.5002197155	2440.46160947348	1351.12132937265	2.96716	8.73009e-11	10.059
fam53b	ENSDARG00000016156	406586	both	934.679	952.548	846.531	1.12896	0.00391625	2.40713	929.833354135368	950.841760647018	852.275393082532	1.12749	0.00274281	2.5618
FAM83G	ENSDARG00000062929	101882918	both	2623.32	3634.98	1621.88	1.54051	0.0120006	1.9208	2536.88076034216	3626.35377483792	1632.32405793773	1.5254	0.00984668	2.00671
fam83ha	ENSDARG00000068849	565437	both	721.899	912.858	364.585	2.22944	7.19915e-05	4.14272	824.899182508806	1016.61718254325	458.398968482808	2.08407	5.78858e-05	4.23743
fam83hb	ENSDARG00000060830	565918	both	419.731	348.493	272.237	1.74193	0.00056099	3.25104	619.888902756912	628.7356504787	590.33312537807	1.45797	0.000205605	3.68697
fam89b	ENSDARG00000069106	100151239	RefSeq	132.138	153.918	184.698	0.884758	0.250217	0.601684	268.16510526788	482.675522444417	370.763871566977	1.09793	0.0406879	1.39054
fam98a	ENSDARG00000078391	559900	Ens95	193.348	81.3151	148.143	2.57891	0.00124823	2.9037	531.472147034531	502.98852038296	515.217328021644	0.829018	0.0589353	1.22962
far1	ENSDARG00000006899	406829	RefSeq	177.803	158.758	82.7291	1.50941	0.0540685	1.26706	955.095284341762	845.407628489821	643.299392744781	1.09222	0.0191426	1.718
faua	ENSDARG00000099022	393710	both	66986	53291.4	27396.8	1.51678	0.0172392	1.76348	67131.636298093	53731.7486899097	27879.5170957506	1.51114	0.0144995	1.83865
fblim1	ENSDARG00000071558	768160	both	2968.24	2453	1674.78	2.92589	1.33829e-09	8.87345	2928.44067854127	2447.23260878632	1684.32730226141	2.92765	8.02229e-10	9.0957
fbln2	ENSDARG00000015156	553503	both	5659.57	6662.99	7210.9	2.16664	2.54186e-07	6.59485	5606.20528041909	6647.18675398404	7264.08281358366	2.17028	1.5568e-07	6.80777
fbxl7	ENSDARG00000062251	569430	both	395.441	447.233	423.265	1.57315	0.000757311	3.12073	393.503143599607	445.918669031816	426.619208062781	1.57337	0.000606512	3.21716
fbxl8	ENSDARG00000054222	641481	Ens95	280.792	430.776	75.0334	2.00705	0.018412	1.7349	23.3187048059026	51.2661376544171	22.1495299897155	0.663511	0.662428	0.178861
fbxo4	ENSDARG00000074170	100319387	Ens95	154.484	30.9772	18.2774	2.58855	0.0474957	1.32335	153.514806638859	41.5932814932063	27.9276682479022	1.94125	0.0879706	1.05566
FBXO48	ENSDARG00000086184	103908695	both	273.02	350.429	187.583	1.1739	0.0440428	1.35613	405.162496002558	427.540242325516	279.276682479022	1.19857	0.0174755	1.75757
fcho1	ENSDARG00000015356	100913078	both	186.547	227.489	268.389	1.63331	0.00278868	2.5546	426.537975407969	641.310363488274	416.025954589439	1.8984	1.58384e-05	4.80029
fdx1	ENSDARG00000056410	100126232	RefSeq	924.963	810.247	629.126	1.03547	0.053615	1.27071	919.145614432662	808.65077507722	633.66916231447	1.03739	0.0435648	1.36086
fermt2	ENSDARG00000020242	553051	both	378.924	356.237	200.089	1.68082	0.0267012	1.57347	3708.64567683877	3429.99479476534	1117.10672991609	2.35052	0.000112236	3.94987
fermt3b	ENSDARG00000030938	393878	both	413.901	179.087	322.259	2.52681	0.000363105	3.43997	411.96378490428	177.980553366278	317.797604200266	2.53317	0.000366209	3.43627
FERMT3oneOfMany	ENSDARG00000079267	100320305	both	172.945	85.1872	189.507	2.23718	0.00168279	2.77397	190.436089248205	102.532275308834	226.310415112311	2.0442	0.00303141	2.51836
fev	ENSDARG00000009242	791175	both	192.377	171.342	130.827	1.68323	0.00248731	2.60427	191.407701948451	171.209554053431	131.934156895262	1.69243	0.00204703	2.68888
fgd5a	ENSDARG00000088801	100151562	both	9908.37	8725.88	3414.98	6.25629	1.8454e-25	24.7339	2843.91037361988	2986.01069696576	1277.93157810228	5.57364	1.87578e-23	22.7268
fgf10b	ENSDARG00000100475	751792	Ens95	163.229	84.2192	132.751	2.29456	0.000878058	3.05648	0	19.3457123224215	37.5578986782133	1.96659	1	0
fgf9	ENSDARG00000078625	101883614	RefSeq	16.5172	3.87215	11.5436	2.04478	0.416855	0.380015	155.458032039351	148.961984882646	24.0755760757777	3.23382	0.00425311	2.37129
fhit	ENSDARG00000078195	393713	both	216.667	300.091	162.572	1.46622	0.0323592	1.49	215.698019454599	302.760397845897	164.67694035832	1.46889	0.0273506	1.56303
fhl1b	ENSDARG00000056653	387528	both	1060.02	824.767	637.784	1.76811	5.55422e-05	4.25538	1054.19977976685	821.225488086794	639.447300572657	1.79238	3.3307e-05	4.47746
fhl3a	ENSDARG00000034643	567097	both	636.398	1025.15	609.887	1.15934	0.0165719	1.78063	633.491480560355	1022.42089623998	614.408701453848	1.16564	0.0126719	1.89716
fhod1	ENSDARG00000051768	503946	both	458.595	473.37	323.221	2.53138	4.01697e-07	6.3961	454.714743715101	440.11495533509	322.612719415422	2.53976	3.36529e-07	6.47298
fibpb	ENSDARG00000087666	405787	RefSeq	0	7.74429	13.4675	-1.75582	0.407496	0.389876	311.887676778948	203.129979385426	166.602986444382	1.73636	0.00765101	2.11628
fkbp1aa	ENSDARG00000022684	335335	both	19853.7	21105.1	10773.1	1.38254	0.00923647	2.03449	19748.0281324988	21067.480719117	10859.0478332188	1.38038	0.00730497	2.13638
fkbp1ab	ENSDARG00000033567	449552	both	369.208	240.073	101.968	3.6143	8.87753e-07	6.05171	367.269600692967	238.919547181906	103.043465604329	3.61016	9.23758e-07	6.03444
fkbp1b	ENSDARG00000052625	393785	both	1833.41	1654.37	989.864	2.83325	1.46704e-10	9.83356	1823.71703836164	1650.18926110256	996.728849537198	2.83327	7.30294e-11	10.1365
fli1a	ENSDARG00000054632	30619	both	7777.66	6915.65	5014.73	3.87313	1.6643e-18	17.7788	7723.349354255	6900.61558540776	5064.5381833006	3.8616	1.76475e-19	18.7533
fli1b	ENSDARG00000040080	386723	both	4157.48	4567.2	3552.54	5.06632	2.74908e-17	16.5608	4136.15526494698	4571.39182178821	3597.85408876422	5.0543	1.02426e-17	16.9896
flna	ENSDARG00000074201	562529	both	11500.8	12940.7	6186.41	1.8557	0.000242138	3.61594	11364.9537547768	12840.7165540073	6219.2028118949	1.84806	0.000181673	3.74071
flot1b	ENSDARG00000037998	245697	both	3692.08	3841.17	4268.25	1.09022	0.00210316	2.67713	3672.69600692967	3832.38561107171	4298.93486409087	1.09203	0.00135798	2.86711
flt1	ENSDARG00000019371	544667	both	6363.98	7104.42	3262.99	6.97919	4.4472e-33	32.3519	6329.08512940207	7088.26899493525	3286.79764586518	6.97669	1.42019e-33	32.8477
flt4	ENSDARG00000104453	30121	both	5035.8	5832.42	3136.97	4.29051	1.0794e-22	21.9668	4868.75124093242	5605.42014542164	3089.3779220438	4.27608	1.85716e-23	22.7312
fmnl1a	ENSDARG00000055713	557062	RefSeq	811.286	465.626	1368.88	0.24207	0.83471	0.0784642	383.787016597148	213.770121162758	570.109641474417	1.85385	0.0125989	1.89967
fmnl3	ENSDARG00000004372	407694	both	3420.03	3003.82	1633.42	2.79537	8.46579e-10	9.07233	3401.61606356105	2997.61812435922	1645.80638054017	2.79452	4.26239e-10	9.37035
fnbp1l	ENSDARG00000020131	445240	RefSeq	71.8984	60.0183	86.577	-0.417031	0.693782	0.158777	1334.99585013793	1718.86653984715	1073.77069297969	1.06321	0.0253842	1.59544
FO904898.5	ENSDARG00000092230	100006469	RefSeq	0	11.6164	0.961967	-0.208957	0.972893	0.0119349	757.857906191836	830.898344248005	402.543631987004	1.08589	0.0443438	1.35317
fosl2	ENSDARG00000040623	558921	both	17509.2	14074.3	10978.9	2.62397	0.000864537	3.06322	18858.0308990735	15955.3762379172	12660.86394673	2.57089	0.00107692	2.96781
foxc1a	ENSDARG00000091481	100148408	both	1586.62	1803.45	1278.45	1.48694	0.00121449	2.9156	1577.89902519941	1799.1512459852	1287.56180853259	1.48754	0.000901679	3.04495
foxc1b	ENSDARG00000055398	79375	both	1534.16	2024.16	1033.15	1.23343	0.0289181	1.53883	1494.34033297826	1991.6410835933	1033.32372517238	1.22312	0.0253134	1.59665
foxf2a	ENSDARG00000017195	407681	Ens95	887.071	997.078	696.464	1.58478	0.00118008	2.92809	56.3535366142647	133.485415024709	225.34739206928	0.793619	0.517427	0.286151
foxf2b	ENSDARG00000070389	100002904	both	2022.87	1562.41	707.045	3.23059	6.46805e-09	8.18923	2012.20990220935	1564.10084126778	712.637051843021	3.23274	4.33953e-09	8.36256
foxl2a	ENSDARG00000042180	692279	both	166.144	148.11	121.208	2.12541	0.000312613	3.50499	609.201163054206	554.254658037377	338.021088103919	1.71531	0.0205978	1.68618
foxl2b	ENSDARG00000068417	100149117	RefSeq	67.0404	62.9224	244.34	1.93455	0.0536329	1.27057	67.0412763169701	62.87356504787	245.570875972933	1.93921	0.0494912	1.30547
foxo1a	ENSDARG00000099555	768121	both	6332.89	5045.41	3464.04	2.81191	1.68491e-11	10.7734	6321.31222780011	5027.95063259736	3481.32830055746	2.81093	7.16459e-12	11.1448
foxo1b	ENSDARG00000061549	567969	both	117.564	253.626	51.9462	2.76876	0.00550892	2.25893	115.621911329267	242.78868964639	48.1511521515555	2.75699	0.00582581	2.23464
foxp1a	ENSDARG00000004843	564127	both	1508.89	1234.25	1201.5	1.3118	0.00067756	3.16905	1413.69647885785	1171.38288112262	1192.22252727251	1.33364	0.000320731	3.49386
foxp1b	ENSDARG00000014181	569047	both	802.541	954.484	345.346	1.45461	0.013664	1.86442	6371.8360882129	5243.65532499236	3238.64649371362	1.4525	0.0022638	2.64516
FQ976914.1	ENSDARG00000098654	101885083	both	779.223	599.215	381.901	3.11487	2.72016e-08	7.56541	813.239830105854	645.179505952758	407.358747202159	3.08648	1.54447e-08	7.81122
frem1b	ENSDARG00000062402	557221	both	1730.42	2281.66	1018.72	2.63162	2.0352e-07	6.69139	1907.27573058279	2433.69061016063	1064.14046254938	2.70986	1.09458e-07	6.96075
frmd6	ENSDARG00000002332	321937	Ens95	1789.69	1641.79	1083.17	1.25291	0.013513	1.86925	74.8141779189376	90.9248479153812	84.7460277867376	1.41389	0.129347	0.888244
fryl	ENSDARG00000040001	558173	both	3949.55	3162.58	2292.37	1.1591	0.0163433	1.78666	4030.24948062017	3228.79938661215	2314.14437240376	1.1572	0.0127769	1.89358
fth1a	ENSDARG00000015551	58108	both	18336	21280.3	15732	1.07928	0.0144616	1.83978	18238.1419963166	21234.821130706	15836.9139426466	1.08118	0.0104965	1.97896
fthl27	ENSDARG00000031776	436651	both	35930.7	22653	15827.2	1.18245	0.0353899	1.45112	35569.7693433037	22328.8211625389	15687.6453709768	1.21438	0.024961	1.60274
ftr82	ENSDARG00000055647	338307	both	2082.14	3135.47	2469.37	3.38392	4.64498e-14	13.333	2070.5066642241	3128.20168253556	2487.48852014936	3.38571	2.5639e-14	13.5911
ftr83	ENSDARG00000025403	565972	both	515.919	481.114	327.069	1.32247	0.0114023	1.94301	499.408927926415	441.082240951211	311.056442899048	1.62258	0.00233718	2.63131
ftr93	ENSDARG00000039852	568694	Ens95	111.734	208.128	82.7291	2.63389	0.000491756	3.30825	10.6877397027054	35.7895677964798	47.1881291085244	1.63963	0.272644	0.564405
fuca1.2	ENSDARG00000035879	445165	both	469.283	362.046	340.536	1.07816	0.0283164	1.54796	460.544419916577	385.94696083231	364.022710265759	1.03489	0.0217605	1.66233
fuca2	ENSDARG00000044073	445487	both	1058.07	1313.63	1267.87	1.38304	0.000936394	3.02854	1052.25655436636	1309.70472422794	1276.96855505925	1.38802	0.00063093	3.20002
fzd4	ENSDARG00000104117	30363	both	4642.3	4887.62	2204.83	2.59803	9.47892e-08	7.02324	4617.10355156872	4876.08679086635	2221.69416027277	2.59711	5.64655e-08	7.24822
fzd6	ENSDARG00000104874	393533	both	693.722	1080.33	826.329	1.74426	0.000157109	3.8038	689.84501717462	1077.55617635888	832.051909178879	1.74376	0.000122877	3.91053
gab1	ENSDARG00000037018	406666	Ens95	1164.95	1506.26	1380.42	1.01269	0.0101267	1.99453	1166.90685299538	1485.75070636197	1401.19852761026	0.981929	0.0088193	2.05457
gab2	ENSDARG00000105120	564517	both	197.235	320.42	95.2347	1.58368	0.0365775	1.43679	1786.79575575229	2223.78963146235	1046.80604777482	1.8793	3.96875e-05	4.40135
gabpa	ENSDARG00000069289	58110	both	1081.39	780.237	961.005	1.04739	0.0119139	1.92394	804.495315803641	701.282071687781	948.577697385643	1.12825	0.00621147	2.20681
gadd45ab	ENSDARG00000104571	431763	both	3898.06	6345.48	1547.8	2.23969	0.000370124	3.43165	3876.73467398131	6330.88435751245	1559.13430666737	2.23859	0.000302139	3.51979
gadd45ba	ENSDARG00000027744	406304	RefSeq	10651.6	19039.3	7948.73	1.64199	0.0513598	1.28938	10583.7771437791	18944.2887917313	7955.53335847999	1.66757	0.0423796	1.37284
galnt18b	ENSDARG00000059438	100310831	both	544.096	844.128	469.44	1.73857	0.00040172	3.39608	541.18827403699	823.160059319036	468.99222195615	1.68494	0.00037808	3.42242
gas6	ENSDARG00000007804	335830	both	1017.26	996.11	854.226	1.8092	0.000980786	3.00843	1011.44882095603	992.435042140225	855.164462211625	1.81696	0.000898721	3.04638
gata1b	ENSDARG00000059130	564960	both	35.9492	49.3699	51.9462	2.50114	0.0260849	1.58361	34.978057208854	49.3315664221749	52.966267366711	2.33768	0.0368553	1.4335
gata2a	ENSDARG00000059327	30480	both	2278.4	2158.72	1442.95	2.3011	5.36281e-07	6.27061	2265.80081697354	2178.32720750466	1480.16641713882	2.29672	3.03199e-07	6.51827
gata4	ENSDARG00000098952	30483	both	1111.51	402.703	373.243	4.45435	1.19058e-07	6.92424	999.789468553075	347.255536187466	366.911779394853	4.36512	1.6827e-07	6.77399
gata5	ENSDARG00000017821	30482	both	995.89	746.356	650.289	3.35385	1.44324e-08	7.84066	918.174001732416	696.445643607175	625.00195492719	3.40247	4.47484e-09	8.34922
gata6	ENSDARG00000103589	58076	both	307.997	223.616	236.644	2.46249	1.7247e-06	5.76329	306.058000577472	222.475691707848	238.829714671715	2.45083	1.43167e-06	5.84416
gbp1	ENSDARG00000038668	436615	both	361.435	336.877	252.997	2.47272	6.66693e-06	5.17607	350.752184788785	336.615394410135	255.201106403244	2.63268	2.28885e-06	5.64038
GCA	ENSDARG00000020187	449543	both	2352.24	2332.97	1537.22	1.33732	0.00962972	2.01639	2338.67176949199	2318.58362184222	1545.65198406493	1.34428	0.00748469	2.12583
gcga	ENSDARG00000079296	494052	both	3310.24	50.3379	3715.11	5.96479	0.00314311	2.50264	3341.3760761458	55.1352801189014	3766.38312129467	5.92219	0.00250635	2.60096
gcnt4a	ENSDARG00000035198	324510	both	950.225	751.196	879.237	2.61874	2.1207e-11	10.6735	945.379157339303	749.646352493834	885.01817654559	2.61846	1.05689e-11	10.976
gdi2	ENSDARG00000005451	323765	both	12058.5	13084	7798.66	1.71797	0.000139896	3.85419	11994.5587845362	13053.5193895539	7855.37896200476	1.71811	9.24262e-05	4.0342
gdpd4b	ENSDARG00000079293	571892	both	156.428	329.132	175.078	1.87394	0.00351852	2.45364	415.850235705264	669.361646355785	315.871558114204	2.14951	5.05144e-05	4.29659
gemin7	ENSDARG00000041011	798703	both	481.913	541.132	265.503	1.4812	0.0164232	1.78454	479.00506122125	539.745373795561	267.720405962648	1.47897	0.0141682	1.84868
gfod2	ENSDARG00000061145	777639	both	322.571	277.826	148.143	1.40467	0.0381079	1.41898	320.632191081161	276.643686210628	149.268571669822	1.40557	0.032845	1.48353
ggh	ENSDARG00000037176	406624	both	314.798	270.082	291.476	1.19945	0.00905801	2.04297	280.796070371078	219.573834859484	276.387613349928	1.28568	0.00679877	2.16757
gig2j	ENSDARG00000069769	100005405	both	41.7788	34.8493	14.4295	3.75053	0.0338938	1.46988	41.7793461105756	34.8222821803588	15.4083686884978	3.7652	0.0323203	1.49052
ginm1	ENSDARG00000021975	555775	both	1888.79	1860.57	2150.96	1.05284	0.00477081	2.32141	1790.68220655327	1719.83382546327	2118.65069466844	1.06995	0.00335829	2.47388
gja5a	ENSDARG00000040065	404729	both	181.689	136.493	63.4898	2.37251	0.00895288	2.04804	180.719962245745	143.158271185919	78.0048664855199	2.15641	0.00783723	2.10584
glo1	ENSDARG00000068978	368213	both	1935.43	2043.52	1241.9	1.22246	0.0188734	1.72415	1925.73637188746	2039.03807878323	1247.11484072529	1.22825	0.0148799	1.8274
glrx	ENSDARG00000028106	449769	both	2026.76	2717.28	1897.96	1.1627	0.0368122	1.43401	1973.34539419951	2664.87187241357	1747.88682310146	1.1806	0.0312248	1.5055
glud1a	ENSDARG00000008816	317737	both	1511.81	1845.08	1618.03	1.00389	0.0329193	1.48255	1503.08484728047	1840.74452747841	1629.43498880864	1.00525	0.0258438	1.58764
gna12a	ENSDARG00000025826	503589	both	1054.19	1044.51	852.302	1.37752	0.00046279	3.33462	1048.37010356537	1042.73389417852	858.053531340718	1.37659	0.000297835	3.52602
gna13b	ENSDARG00000037924	336333	both	180.718	99.7078	104.854	1.88131	0.0052564	2.27931	179.748349545499	99.6304184604709	104.969511690391	1.89115	0.00456549	2.34051
gnai2a	ENSDARG00000018174	336421	both	7429.82	8449.02	6173.9	1.9801	2.61394e-08	7.5827	7390.08619807064	8429.89414449518	6218.23978885187	1.98077	8.93387e-09	8.04896
gnb4b	ENSDARG00000115383	492811	RefSeq	255.531	360.11	396.33	0.983417	0.125235	0.902274	379.900565796164	478.806379979933	476.696406300399	1.20452	0.0111458	1.95289
gng10	ENSDARG00000104043	796780	both	869.582	796.694	251.073	2.98145	0.000108264	3.96552	865.706915919135	768.992064816256	244.607852929902	3.09809	0.000280493	3.55208
gng2	ENSDARG00000056831	550256	Ens95	1560.39	2227.45	1623.8	1.20339	0.0463195	1.33424	1661.45771742056	2266.35019857168	1669.88195661594	1.05524	0.0504314	1.2973
gng5	ENSDARG00000039830	337838	both	3602.69	5356.15	3232.21	1.22185	0.0288546	1.53978	3583.30763850704	5346.18760030119	3265.61113891849	1.22301	0.023342	1.63186
gnpda1	ENSDARG00000037307	550565	both	217.638	409.479	235.682	1.50143	0.0225921	1.64604	213.754794054107	354.026535500314	223.421345983217	1.75756	0.0174442	1.75835
gpd2	ENSDARG00000062430	751628	RefSeq	89.3872	137.461	124.094	0.93036	0.239438	0.620807	147.685130437383	174.111410901794	182.974378175911	1.24987	0.037507	1.42589
gpr137ba	ENSDARG00000078448	100001171	Ens95	458.595	379.47	361.699	1.76328	0.00024575	3.60951	66.0696636167241	38.6914246448431	50.0771982376177	1.9967	0.0789709	1.10253
gpr146	ENSDARG00000059610	565192	both	1317.49	1754.08	906.173	1.06311	0.0332662	1.478	1309.73391993153	1750.78696517915	911.982821750461	1.0664	0.0258356	1.58778
gpr156	ENSDARG00000086215	101885196	both	2098.66	1935.1	777.269	4.2511	2.9298e-14	13.5332	2108.3995595337	1965.52437195803	782.937733984292	4.28713	1.11068e-14	13.9544
gpr182	ENSDARG00000036616	323641	both	2301.72	2596.27	2842.61	4.38725	1.55012e-33	32.8096	2289.11952177944	2589.42359435612	2864.03052997452	4.38768	1.25847e-34	33.9002
gpr78a	ENSDARG00000074600	557394	both	135.052	192.639	184.698	1.41905	0.0233147	1.63237	102.019333525824	184.751552679126	170.455078616506	1.66499	0.0140672	1.85179
gpx1a	ENSDARG00000018146	352926	both	910.389	1034.83	1294.81	1.22875	0.0255943	1.59186	905.543036629219	1032.09375240119	1303.93320026412	1.23254	0.021494	1.66768
gpx4b	ENSDARG00000076836	352929	both	2624.29	4285.5	2605.01	1.13142	0.0403013	1.39468	2610.72332556085	4275.40242325516	2623.27476921674	1.13302	0.0325628	1.48728
grapa	ENSDARG00000005414	553596	both	10419.4	9386.08	5068.6	6.53594	1.60068e-28	27.7957	10364.1926735235	9380.7359051422	5125.20863501156	6.52553	3.9293e-29	28.4057
grasp	ENSDARG00000000588	558950	both	1915.02	2443.32	907.134	3.10161	4.50698e-09	8.34611	1904.36089248205	2436.59246700899	913.908867836523	3.11251	2.23119e-09	8.65146
grb10a	ENSDARG00000002013	446167	both	11280.3	10588.4	3552.54	4.16178	1.99107e-10	9.70091	11220.1834624402	10577.268212284	3583.40874311876	4.14503	1.88539e-10	9.7246
grb2a	ENSDARG00000105276	493609	both	549.925	763.781	364.585	1.39607	0.0175355	1.75608	547.017950238466	762.221065503408	367.874802437884	1.39719	0.0145054	1.83847
grb2b	ENSDARG00000038059	406308	both	3142.15	3412.33	2577.11	1.10614	0.00377618	2.42295	3068.35290737669	3335.20080438547	2583.79082445247	1.11818	0.00198089	2.70314
grinab	ENSDARG00000052746	394183	both	2326.01	2517.86	1746.93	1.59453	0.000447674	3.34904	2314.38145198584	2512.04074506644	1759.44309961784	1.59559	0.00030588	3.51445
grk4	ENSDARG00000070448	560761	RefSeq	1915.99	1672.77	1341.94	0.889727	0.0353952	1.45106	1262.12489761948	1111.41117292312	724.193328359394	1.20229	0.0148799	1.8274
grwd1	ENSDARG00000004806	445115	both	412.93	601.151	531.968	1.44325	0.0127878	1.8932	410.020559503788	593.913368298341	528.699650624079	1.4262	0.013183	1.87998
gsr	ENSDARG00000019236	553575	both	1105.68	945.772	1162.06	1.11915	0.033954	1.46911	1099.86557667841	943.10347571805	1171.03602032583	1.1242	0.0281945	1.54984
gstr	ENSDARG00000042620	564619	both	4162.33	3438.47	2545.36	1.40352	0.0134668	1.87074	3010.05614536193	2497.53146082462	1948.19561605193	1.38525	0.0135145	1.8692
gstt1b	ENSDARG00000017388	393556	both	3948.58	4805.33	2339.5	2.72053	1.23873e-08	7.90702	3901.99660418771	4785.16194295097	2331.47878717832	2.72008	9.95231e-09	8.00208
gtpbp3	ENSDARG00000018650	553807	both	136.024	120.037	75.0334	1.94185	0.00958763	2.01829	135.054165334186	109.303274621682	75.1157973564265	2.04403	0.0065722	2.18229
gulp1b	ENSDARG00000057833	100006392	both	865.695	1156.8	645.48	3.49151	1.0764e-11	10.968	860.848852417906	1165.5791674259	669.301014906621	3.43208	2.64835e-12	11.577
gypc	ENSDARG00000041546	335987	both	68.9836	136.493	102.93	2.79106	0.000182815	3.73799	68.984501717462	136.387271873072	104.00648864736	2.89269	0.000106976	3.97071
h1fx	ENSDARG00000054058	322508	both	9202.99	10140.2	4628.02	1.78331	0.000487342	3.31217	8790.18009912505	9828.58914540626	4547.3948091929	1.79131	0.000282362	3.54919
hapln1b	ENSDARG00000068516	569074	both	1924.74	1499.49	1539.15	2.01227	1.41453e-07	6.84939	126.309651031973	115.106988318408	44.299059979431	2.42176	0.00630016	2.20065
hapln3	ENSDARG00000045802	406374	both	801.57	1010.63	333.802	2.25427	0.000645394	3.19018	796.722414201673	1007.91161199816	335.132018974826	2.2532	0.000566279	3.24697
hbae1.1	ENSDARG00000088330	572729	both	11070.4	13853.6	3803.62	2.83894	0.000105477	3.97684	8261.62279019126	8377.66072122464	2482.6734049342	2.83133	6.16936e-05	4.20976
hbae1.3	ENSDARG00000089124	100334599	both	6428.1	10212.8	1163.98	2.67929	0.00630024	2.20064	6105.61420834551	9449.4131838868	1079.54883123787	2.67741	0.00600592	2.22142
hbae3	ENSDARG00000079305	30601	both	34900.8	43495.8	7630.32	2.94872	0.00281788	2.55008	34681.7153352789	43346.0030296177	7686.84992947432	2.94497	0.00262542	2.5808
hbae5	ENSDARG00000045142	561790	both	290.508	174.247	16.3534	5.95459	2.70247e-05	4.56824	288.568971973045	174.111410901794	16.3713917315289	5.94799	3.59557e-05	4.44423
hbbe1.1	ENSDARG00000113599	81538	both	26924	35403	4951.24	3.24978	0.00051551	3.28776	26801.9363362843	35362.9948397704	4998.08959333146	3.24841	0.000471911	3.32614
hbbe1.2	ENSDARG00000115405	793447	both	3367.56	4678.52	975.434	2.71119	0.00127257	2.89532	3355.95026664949	4684.56423887437	988.061642149918	2.71191	0.00109698	2.9598
hbbe1.3	ENSDARG00000087390	573653	both	4400.38	7807.21	2051.87	2.6671	0.00031017	3.5084	4584.06871976036	8051.68546859184	2167.76486986303	2.66213	0.000244647	3.61146
hbbe2	ENSDARG00000045143	405772	both	5946.19	9025	791.698	3.55242	0.000288747	3.53948	5894.77425239214	9000.59265800662	797.383079629759	3.55075	0.000268633	3.57084
hbegfa	ENSDARG00000075121	797938	both	6910.02	6159.62	3726.66	2.31772	0.000434689	3.36182	6824.6076065275	6126.7870925109	3682.60011655096	2.32558	0.000379689	3.42057
hbegfb	ENSDARG00000031246	407664	both	738.416	1066.78	367.471	2.20049	0.000193028	3.71438	734.539201385933	1064.01417773318	370.763871566977	2.19854	0.000159632	3.79688
hbl2	ENSDARG00000094681	566971	both	712.183	770.557	177.964	5.15964	2.58731e-11	10.5872	708.305658479293	786.403205906435	187.789493391066	5.1783	1.52063e-11	10.818
hbp1	ENSDARG00000028517	554137	RefSeq	2767.12	1807.32	1121.65	0.943841	0.108225	0.965673	1147.47459899046	640.343077872153	416.98897763247	1.28859	0.0284892	1.54532
hcst	ENSDARG00000092074	100101460	both	60.2392	28.0731	36.5547	3.20454	0.00701958	2.15369	83.5586922211511	48.3642808060538	42.3730138933688	2.84755	0.0032824	2.48381
hdac9b	ENSDARG00000056642	393789	both	647.085	779.269	643.556	1.06028	0.0439009	1.35753	701.504369577571	751.580923726077	636.558231443563	1.19118	0.0166386	1.77888
hdr	ENSDARG00000004392	373093	both	252.616	71.6347	165.458	2.05005	0.0181487	1.74116	250.676076663453	78.3501349058072	166.602986444382	1.86864	0.0287702	1.54106
hectd3	ENSDARG00000038905	563189	RefSeq	1114.42	857.68	695.502	0.973989	0.0520747	1.28337	1083.34816077423	859.916912731637	704.932867498772	1.0127	0.0329317	1.48239
heg1	ENSDARG00000018441	406202	both	995.89	989.333	367.471	3.55987	2.62776e-10	9.58041	990.073341550616	986.631328443498	369.800848523946	3.55618	2.14299e-10	9.66898
her9	ENSDARG00000056438	140613	both	22756.8	18543.7	16013.9	1.60991	0.0133224	1.87542	22624.0017252268	18501.2719795478	16152.7855007608	1.60934	0.0113951	1.94328
hexa	ENSDARG00000052113	550460	both	386.697	613.735	654.137	1.34247	0.0106875	1.97112	384.758629297393	621.964651165852	664.485899691466	1.29419	0.0117211	1.93103
hey2	ENSDARG00000013441	58146	both	1002.69	796.694	475.211	1.73269	0.00119892	2.92121	1021.16494795849	794.141490835404	480.548498472524	1.74426	0.000911233	3.04037
hic1	ENSDARG00000055493	436585	both	524.664	281.699	77.9193	1.99567	0.0192596	1.71535	507.181829528382	266.970830049417	71.2637051843021	2.00827	0.0197203	1.70509
hip1	ENSDARG00000062972	793823	both	3833.93	4034.78	2038.41	2.1884	8.22298e-07	6.08497	3771.80050235475	3945.55802815787	2046.42396644111	2.17712	4.7725e-07	6.32125
hipk3b	ENSDARG00000062082	569156	Ens95	1482.66	1305.88	638.746	1.31904	0.0180607	1.74327	2612.66655096134	2252.80819994599	1823.00262045789	0.813101	0.0766695	1.11538
hist1h4l	ENSDARG00000061547	100331412	Ens95	328.401	658.265	102.93	2.3613	0.00521956	2.28237						#NUM!
histh1l	ENSDARG00000035519	550353	both	40713.9	39490.1	11333.9	1.81027	0.00352495	2.45285	40496.8173462509	39397.5431446115	11415.6751520908	1.80824	0.00289257	2.53872
hivep1	ENSDARG00000103658	100000517	RefSeq	2677.73	2633.06	1840.24	0.981101	0.0345868	1.46109	2615.58138906208	2569.11059641758	1789.2968139518	1.01277	0.0221972	1.6537
hkdc1	ENSDARG00000038703	321224	both	181.689	268.146	215.481	2.04198	0.00191842	2.71706	180.719962245745	266.970830049417	216.680184682	2.03974	0.00187932	2.726
hlx1	ENSDARG00000009134	327096	both	7224.82	8467.41	3534.27	5.95584	1.8188e-28	27.7402	7249.20235653498	8481.1602821496	3570.88944355935	5.95238	4.82029e-29	28.3169
hmg20a	ENSDARG00000031198	326908	both	395.441	776.365	594.495	1.22716	0.0178851	1.74751	393.503143599607	774.795778512982	589.370102335039	1.24059	0.0137331	1.86223
hmgcrb	ENSDARG00000105206	541479	both	1302.92	1267.16	830.177	1.00619	0.0294189	1.53137	1296.13134212809	1264.24230027025	835.904001351003	1.00546	0.0222987	1.65172
hmha1a	ENSDARG00000052496	556955	both	424.589	590.502	265.503	2.23387	2.23985e-05	4.64978	164.202546341564	386.914246448431	97.2653273461421	2.94452	0.000131259	3.88187
hmha1b	ENSDARG00000062049	555849	both	443.049	237.169	893.667	2.34998	0.00123437	2.90855	428.481200808461	242.78868964639	911.982821750461	2.28341	0.000881882	3.05459
hmox2b	ENSDARG00000078452	100329531	RefSeq	18.4604	30.0091	32.7069	-0.182023	0.92731	0.0327749	441.112165911658	387.881532064552	161.787871229226	1.31504	0.0434408	1.3621
hopx	ENSDARG00000089368	386589	both	3921.38	5548.78	3422.68	3.19136	5.83161e-13	12.2342	3913.65595659066	5525.13543928359	3268.50020804759	3.21605	1.73678e-13	12.7603
hpgd	ENSDARG00000012016	565975	both	1940.28	1408.49	855.188	1.28956	0.0168948	1.77225	2016.09635301033	1428.68085501083	895.611430018932	1.30127	0.0123178	1.90947
hrasa	ENSDARG00000098497	550286	both	276.906	192.639	144.295	1.44967	0.0419149	1.37763	275.938006869848	191.522551991973	142.527410368604	1.44661	0.0385551	1.41392
hsd3b7	ENSDARG00000036966	327462	both	680.12	1466.58	1316.93	1.86132	0.000371003	3.43062	676.242439371176	1464.47042280731	1322.23063808171	1.8847	0.000253791	3.59552
hsp90ab1	ENSDARG00000029150	30573	both	148423	127125	111680	1.12034	0.0287936	1.5407	147163.374417351	126647.673004349	112383.826098687	1.12057	0.0225876	1.64613
hspa12a	ENSDARG00000070603	751725	both	1726.53	2304.89	915.792	2.24273	2.19837e-05	4.6579	1873.26928607418	2319.55090745834	930.280259568052	2.26544	1.46149e-05	4.8352
hspa12b	ENSDARG00000030307	735291	both	3459.87	4002.83	1986.46	2.41987	4.84106e-06	5.31506	3405.50251436203	3866.24060763594	1919.304924761	2.44573	3.32638e-06	5.47803
hspb8	ENSDARG00000058365	791580	both	3227.65	871.233	1130.31	2.54258	0.000171409	3.76597	1199.94168480374	236.984975949664	310.093419856017	2.3411	0.00332459	2.47826
hspg2	ENSDARG00000076564	565429	both	1255.31	1401.72	642.594	1.26448	0.0289271	1.53869	5401.1950006672	5943.00282544789	3747.12266043405	1.35683	0.00162435	2.78932
htra3a	ENSDARG00000052895	445108	both	100.075	156.822	76.9573	2.42813	0.0012299	2.91013	93.2748192236105	122.845273247377	73.1897512703643	2.82936	0.000190833	3.71935
hyal1	ENSDARG00000059916	664772	both	1689.61	1536.27	1343.87	4.12177	1.62293e-12	11.7897	1993.74926090468	1778.83824804666	1558.17128362434	4.18325	1.72568e-13	12.763
hyal2a	ENSDARG00000059931	567869	both	101.046	86.1552	77.9193	1.90722	0.00620517	2.20725	131.167714533202	142.190985569798	96.3023043031109	2.1169	0.000576253	3.23939
hyal2b	ENSDARG00000062997	559228	Ens95	2866.22	3507.2	1554.54	2.83404	8.1926e-08	7.08658	70.9277271179539	244.723260878632	99.1913734322043	1.78723	0.05114	1.29124
iba57	ENSDARG00000063446	100330979	RefSeq	308.969	289.443	155.839	1.02444	0.111435	0.952978	447.91345481338	450.755097112422	266.757382919617	1.24494	0.0191204	1.7185
id2b	ENSDARG00000029544	321364	both	6224.07	4484.91	2541.52	2.7696	2.53946e-07	6.59526	6226.094183176	4498.84540057913	2573.19757097912	2.7656	1.60011e-07	6.79585
ier2a	ENSDARG00000099195	797137	both	34349	31956.8	19261.5	1.79275	0.0404338	1.39326	34165.7889914483	31882.7011929668	19402.0252479478	1.79311	0.0351877	1.45361
ier2b	ENSDARG00000086881	100331484	both	25265.5	27691.7	15549.2	2.34293	0.0121507	1.9154	25130.7624918613	27626.6444820341	15662.606771858	2.34319	0.0107311	1.96936
ier5l	ENSDARG00000054906	326935	both	7299.63	8616.49	5374.51	1.18307	0.025078	1.60071	7260.86170893793	8596.26727046801	5413.15252487787	1.18351	0.0199462	1.70014
ifi30	ENSDARG00000056378	336503	both	1522.5	1822.81	1247.67	1.50096	0.00300349	2.52237	1514.74419968343	1818.49695830762	1256.7450711556	1.50967	0.00216548	2.66445
ifi45	ENSDARG00000017489	403118	both	213.752	302.027	74.0714	1.84135	0.0290442	1.53694	211.811568653616	297.923969765292	74.1527743133954	1.8442	0.0276242	1.55871
igf2bp2b	ENSDARG00000099758	557028	Ens95	3254.86	3032.86	1154.36	1.45863	0.0165312	1.7817	5424.5137054731	5032.78706067796	3062.41327683893	0.912654	0.0565623	1.24747
igfbp1a	ENSDARG00000099351	317638	both	51532.7	58278.7	14592.1	5.85919	1.03096e-15	14.9868	51242.853810971	58143.5383850379	14672.619083622	5.86277	8.43146e-16	15.0741
igfbp3	ENSDARG00000099144	403079	both	4604.41	3604	1487.2	2.75498	6.72403e-07	6.17237	4579.21065625913	3595.40063512204	1491.72269365519	2.75182	5.08376e-07	6.29381
igfbp7	ENSDARG00000104138	405860	both	4455.76	4235.16	3544.85	3.78025	3.78122e-23	22.4224	16287.1436942227	18986.8493588406	11228.8486817427	3.86619	4.64043e-13	12.3334
ihha	ENSDARG00000058733	619520	both	563.528	1010.63	492.527	3.84225	7.29727e-08	7.13684	560.620528041909	1007.91161199816	495.956867161021	3.793	8.06802e-09	8.09323
ikbke	ENSDARG00000070606	437024	both	206.951	247.817	364.585	1.29114	0.0438581	1.35795	205.98189245214	238.919547181906	364.98573330879	1.28715	0.0458085	1.33905
il10rb	ENSDARG00000078042	619391	both	721.899	1029.02	507.918	1.63905	0.0030151	2.5207	730.652750584949	1030.15918116895	526.773604538017	1.61581	0.0030635	2.51378
il11a	ENSDARG00000037859	570404	both	9.716	126.813	45.2124	3.15697	0.0336711	1.47274	2209.44728035927	3209.45367428973	1280.82064723138	3.59159	0.000582702	3.23455
il12a	ENSDARG00000038878	445410	Ens95	73.8416	50.3379	33.6688	3.64565	0.00560846	2.25116	72.8709525184457	57.0698513511435	37.5578986782133	1.93985	0.0954371	1.02028
il13ra1	ENSDARG00000080020	799475	both	5251.5	6753.99	3510.22	2.94306	5.61858e-05	4.25037	350.752184788785	838.636629176973	1228.8174029077	2.06985	0.022911	1.63996
il15	ENSDARG00000052361	654826	both	610.165	954.484	299.172	2.02618	0.00253353	2.59627	606.286324953469	952.77633187926	301.426212468737	2.02356	0.00228247	2.64159
il1b	ENSDARG00000098700	405770	both	191.405	313.644	269.351	1.71636	0.012059	1.91869	178.776736845254	294.054827300807	262.905290747493	1.84631	0.00796789	2.09866
il4r.1	ENSDARG00000102583	503594	both	1343.72	1861.53	518.5	2.83047	2.07425e-05	4.68314	1396.20745025342	2040.00536439935	520.032443236799	3.03803	3.81271e-06	5.41877
il4r.2	ENSDARG00000116052	563674	both	466.368	1088.07	217.404	3.16489	0.000318317	3.49714	334.234768884604	389.816103296794	268.68342900568	1.47316	0.0190843	1.71932
il6r	ENSDARG00000104474	100135755	both	433.333	372.694	327.069	3.33451	1.64018e-12	11.7851	431.396038909199	371.437676590493	330.316903759671	3.33451	1.17963e-12	11.9283
ildr2	ENSDARG00000014180	564738	both	2724.37	3450.08	1672.86	2.44728	3.17591e-07	6.49813	2709.82782098594	3442.56950777491	1685.29032530444	2.44575	1.95314e-07	6.70927
ilk	ENSDARG00000056964	393543	both	2133.63	2252.62	1783.49	1.40762	0.000116271	3.93453	1951.9699147941	2058.38379110565	1712.25497050931	1.41212	5.22945e-05	4.28154
inhbaa	ENSDARG00000012671	30072	both	2055.91	2715.34	994.673	1.4047	0.0187224	1.72764	2031.64215621427	2718.07258130023	1000.58094170932	1.40169	0.0159538	1.79714
inka1b	ENSDARG00000070404	327328	both	2702.99	1671.8	1408.32	3.28889	6.35097e-13	12.1972	2688.45234158052	1667.60040219274	1418.53294238482	3.29168	2.67876e-13	12.5721
inpp5b	ENSDARG00000103683	563543	both	1436.02	1145.19	973.51	1.09991	0.0127531	1.89438	1409.81002805686	1127.85502839718	976.505365633545	1.10472	0.00953536	2.02066
inpp5d	ENSDARG00000074283	559103	both	246.786	229.425	330.917	2.20466	0.000282929	3.54832	926.91851603463	832.832915480247	741.527743133954	2.62298	3.51881e-05	4.4536
INSM2	ENSDARG00000020655	792891	RefSeq	0	22.2648	9.61967	-0.421409	0.910915	0.0405223	362.411537191737	250.526974575359	209.939023380782	1.90928	0.00155554	2.80812
insra	ENSDARG00000011948	245699	both	7033.41	6648.47	3500.6	2.09596	5.6943e-06	5.24456	6929.54177815407	6541.75262182684	3496.73666924596	2.09409	3.43329e-06	5.46429
ip6k2b	ENSDARG00000019613	436662	both	3680.42	2963.16	3903.66	1.02155	0.0161148	1.79277	3647.43407672327	2953.12298601765	3932.02308469602	1.03136	0.0111519	1.95265
iqcc	ENSDARG00000092483	799312	Ens95	235.127	139.397	71.1855	1.5706	0.0487001	1.31247	218.612857555337	137.354557489193	71.2637051843021	1.40199	0.0724983	1.13967
iqgap1	ENSDARG00000078888	100002928	both	2320.18	2675.65	3130.24	1.67641	1.3908e-05	4.85674	353.667022889523	380.143247135583	984.209549977794	1.47954	0.0205666	1.68684
iqgap2	ENSDARG00000060010	563030	both	1999.55	2125.81	1282.3	4.08943	2.21234e-18	17.6551	1914.07701948451	2075.79493219583	1031.39767908632	4.50708	5.30807e-22	21.2751
irak3	ENSDARG00000053131	567444	both	314.798	336.877	132.751	2.06765	0.0217886	1.66177	433.339264309691	463.329810121996	163.713917315289	1.90577	0.0352599	1.45272
irf2	ENSDARG00000040465	494071	both	583.931	558.557	365.547	1.98753	0.000130358	3.88486	326.461867282637	275.676400594507	175.270193831662	2.17354	5.709e-05	4.24344
irf4b	ENSDARG00000055374	569263	RefSeq	11.6592	36.7854	46.1744	1.5647	0.288938	0.539195	102.99094622607	118.008845166771	187.789493391066	2.36139	0.00531517	2.27448
irge4	ENSDARG00000070317	100033386	both	68.9836	62.9224	82.7291	2.29906	0.00552738	2.25748	69.9561144177079	63.8408506639911	89.5611430018932	1.89353	0.0288073	1.5405
iscub	ENSDARG00000026582	550498	both	944.395	790.886	559.865	1.20268	0.0176157	1.7541	938.577868437581	781.56677782583	558.553364958044	1.25116	0.0122333	1.91245
isg15	ENSDARG00000086374	558956	both	165.172	293.315	180.85	3.45987	3.68799e-09	8.43321	164.202546341564	293.087541684686	182.01135513288	3.45979	4.00477e-09	8.39742
ist1	ENSDARG00000051888	321460	both	3943.72	4330.03	2680.04	1.23779	0.0131746	1.88026	3688.2418101336	4147.72072192718	2639.64616094827	1.20184	0.0130304	1.88504
itga1	ENSDARG00000074316	570868	both	946.338	1192.62	487.717	4.20453	1.06407e-11	10.973	1210.62942450645	1439.32099678816	908.130729578336	4.0607	1.152e-13	12.9385
itga2b	ENSDARG00000018687	445380	both	249.701	171.342	150.067	4.87931	3.95537e-08	7.40281	247.761238562716	171.209554053431	151.194617755884	5.02904	5.26628e-09	8.2785
itga4	ENSDARG00000103056	100331333	both	302.168	290.411	185.66	3.74262	3.54368e-11	10.4505	927.890128734876	997.27147022083	429.508277191875	4.02794	2.88281e-14	13.5402
itga5	ENSDARG00000006353	386787	both	2712.71	3941.84	2449.17	2.3836	9.53735e-08	7.02057	2698.16846858298	3931.04874391606	2467.2650362457	2.38838	5.4097e-08	7.26683
itga6b	ENSDARG00000069946	541320	both	1505.98	2108.38	1184.18	2.3932	6.70439e-07	6.17364	1504.05645998072	2106.7480719117	1187.40741205736	2.39928	4.65804e-07	6.3318
itga9	ENSDARG00000032435	394012	both	522.721	874.137	337.65	2.07911	0.000468606	3.32919	1591.50160300285	2033.2343650865	1157.55369772339	2.01419	1.05302e-05	4.97756
itgb1b	ENSDARG00000104484	570216	both	1682.81	1978.67	1525.68	2.64611	6.56472e-12	11.1828	1674.08868252376	1967.45894319027	1536.02175363462	2.64525	2.66161e-12	11.5749
itgb2	ENSDARG00000016939	557797	both	315.77	328.164	309.753	2.21611	7.71967e-07	6.1124	323.547029181899	333.713537561771	315.871558114204	2.22503	4.54025e-07	6.34292
itm2bb	ENSDARG00000041505	406248	both	1551.64	1536.27	1939.32	1.36995	0.022776	1.64252	1542.92096799056	1532.18041593579	1953.97375431012	1.3778	0.0192522	1.71552
itpkb	ENSDARG00000010059	563019	both	873.468	630.192	319.373	2.55635	4.64126e-06	5.33336	868.621754019873	628.7356504787	321.649696372391	2.55334	3.64956e-06	5.43776
itpkcb	ENSDARG00000067741	322720	both	2779.75	2659.2	1402.55	1.99256	0.000186324	3.72973	2765.20974489995	2646.49344570727	1413.71782716967	1.98593	0.000133509	3.87449
itsn2b	ENSDARG00000054973	445153	both	2138.49	1811.2	1037	1.36353	0.00806539	2.09337	2126.86020083837	1806.88953091417	1048.73209386088	1.36316	0.00601822	2.22053
jag2a	ENSDARG00000014246	566455	RefSeq	0	46.4657	12.5056	0.172617	0.963556	0.0161231	506.210216828136	444.951383415695	220.532276854124	2.61738	6.8623e-06	5.16353
jag2b	ENSDARG00000021389	140422	both	4416.89	5387.12	3707.42	3.59945	4.30059e-21	20.3665	4458.73068142863	5361.66417015913	3745.19661434798	3.67052	6.31312e-23	22.1998
jak1	ENSDARG00000020625	30280	both	8391.71	7318.36	3680.48	1.67772	0.001076	2.96819	4297.44297318781	3814.00718436541	2471.11712841783	1.58732	0.000605869	3.21762
jak2b	ENSDARG00000018882	30298	both	1368.98	1009.66	863.846	1.25563	0.003649	2.43783	1285.44360242538	960.514616808229	846.497254824345	1.36102	0.000879337	3.05584
jam2a	ENSDARG00000058996	100005261	both	9437.15	8555.51	4593.39	4.93273	1.71731e-23	22.7652	9369.26126847163	8577.88884376171	4618.6585143772	4.94493	1.69233e-23	22.7715
jam3b	ENSDARG00000061794	569217	RefSeq	3488.04	5326.14	2094.2	1.0663	0.0665451	1.17688	1090.14944967595	1566.03541250002	526.773604538017	1.34888	0.0254361	1.59455
jpt1b	ENSDARG00000099312	402906	both	3486.1	4271.94	2933.04	1.18544	0.0144839	1.83911	3686.29858473311	4564.62082247536	3172.19790374447	1.12902	0.0188538	1.7246
jun	ENSDARG00000043531	335916	both	41998.4	36458.2	25005.4	1.5105	0.0383619	1.4161	41733.680313664	36359.2990243751	25170.5332757041	1.51071	0.0325433	1.48754
jund	ENSDARG00000067850	564873	Ens95	18755.8	15379.2	8703.87	1.61362	0.01616	1.79156	118.536749430005	93.8267047637444	44.299059979431	0.613407	0.635266	0.197044
jupa	ENSDARG00000070787	30415	both	4306.13	4539.12	4210.53	1.48037	1.44172e-05	4.84112	4065.22753782903	4333.43956022242	4096.70002505434	1.53598	4.19396e-06	5.37738
kalrnb	ENSDARG00000063538	678652	both	1946.11	2304.89	1910.47	1.00844	0.0341999	1.46598	1935.45249888992	2299.2379095198	1924.12003997616	1.00915	0.0272831	1.56411
kank3	ENSDARG00000076566	558407	both	1871.3	2147.1	921.564	3.27221	4.69642e-11	10.3282	1806.22800975721	2138.6684972437	928.35421348199	3.32862	1.38886e-11	10.8573
kank4	ENSDARG00000059473	101884737	RefSeq	290.508	256.53	172.192	1.30105	0.0710723	1.1483	294.398648174521	289.218399220202	176.233216874693	1.36145	0.0478498	1.32012
kcnk6	ENSDARG00000007383	504083	RefSeq	0	28.0731	10.5816	-0.986884	0.717985	0.143884	483.86312472248	483.642808060538	192.604608606222	1.84711	0.00170649	2.7679
kcnn1a	ENSDARG00000091306	563352	both	2459.12	3467.51	1693.06	1.95304	0.00227343	2.64332	239.988336960748	252.461545807601	123.266949507982	1.85115	0.00870983	2.05999
kcnn4	ENSDARG00000086091	568363	RefSeq	24.29	51.3059	31.7449	1.43212	0.429524	0.367012	177.805124145008	245.690546494753	107.858580819484	1.66482	0.0238501	1.62251
kcnq5b	ENSDARG00000069953	568646	RefSeq	145.74	183.927	172.192	1.15897	0.0576565	1.23915	135.054165334186	181.849695830762	172.381124702569	1.19883	0.0465581	1.33201
kctd10	ENSDARG00000017115	406787	both	1763.45	2006.74	789.775	1.35104	0.0145414	1.83739	1753.76092394393	2001.31393975451	764.640296166701	1.39188	0.0116388	1.93409
kctd12.2	ENSDARG00000053542	553403	both	1118.31	935.123	988.902	1.19194	0.00870069	2.06045	1112.4965417816	932.463333940718	995.765826494167	1.19328	0.00659145	2.18102
kctd5a	ENSDARG00000015722	322008	both	3983.56	3610.78	2980.17	1.18379	0.0104302	1.98171	3962.23659160296	3603.13892005101	2998.85375599887	1.18619	0.00780275	2.10775
kdm6ba	ENSDARG00000088087	556678	both	7426.91	9519.67	8970.34	1.2353	0.000904798	3.04345	7385.22813456941	9488.10460853164	9030.26707450271	1.23837	0.000569386	3.24459
kdr	ENSDARG00000017321	554230	both	649.029	601.151	644.518	4.76278	4.46379e-20	19.3503	645.150832963306	599.717081995067	649.077531002968	4.76213	3.63807e-20	19.4391
kdrl	ENSDARG00000105215	796537	both	15240.5	14540.9	14380.4	6.22687	1.01516e-62	61.9935	15159.1013492372	14489.9385294937	14482.9035441449	6.23068	5.23845e-66	65.2808
keap1a	ENSDARG00000016132	321837	both	584.903	476.274	382.863	1.59512	0.00311527	2.5065	581.99600744732	474.937237515449	386.172240255475	1.59416	0.00262542	2.5808
khnyn	ENSDARG00000092488	100536128	Ens95	779.223	638.904	451.162	1.15596	0.0187224	1.72764	31.0916064078702	56.1025657350224	6.74116130121777	0.409589	0.833331	0.0791827
KIAA0895L	ENSDARG00000059529	562097	both	218.61	239.105	135.637	1.47809	0.0136375	1.86527	541.18827403699	589.076940217736	314.908535071173	1.43415	0.00469264	2.32858
kif13ba	ENSDARG00000079731	571520	both	2823.47	2685.33	1874.87	1.5304	0.0002041	3.69016	2808.93231641102	2670.67558611029	1887.52516434097	1.52786	0.00012707	3.89596
kitlga	ENSDARG00000070917	553179	both	571.301	615.671	438.657	1.93757	2.1388e-05	4.66983	568.393429643877	614.226366236884	442.027576751279	1.93031	1.7e-05	4.76955
klf17	ENSDARG00000038792	65238	both	849.178	1009.66	578.142	3.13945	8.67248e-07	6.06186	845.303049213971	1006.94432638204	581.66591799079	3.14277	7.68569e-07	6.11432
klf2a	ENSDARG00000042667	117508	both	7922.42	16295.9	7299.4	2.62612	3.13757e-07	6.50341	7880.75061169485	16258.1366357631	7352.68093354252	2.62685	2.06606e-07	6.68486
klf2b	ENSDARG00000040432	117509	both	7151.95	10501.3	4808.87	2.96271	1.13364e-06	5.94553	7031.56111167989	10447.6519397237	4829.56056080101	2.98366	8.24946e-07	6.08357
klf3	ENSDARG00000015495	117603	both	6675.86	7607.8	2810.87	2.66774	1.73817e-06	5.75991	6708.01408249799	7579.65008792476	2761.95008741322	2.69451	1.37856e-06	5.86057
klf6a	ENSDARG00000029072	280650	both	13195.3	25569.7	6897.3	1.96744	0.00391625	2.40713	13172.1533772343	25533.4384087481	6951.10032459855	1.96777	0.00329913	2.4816
klf7b	ENSDARG00000043821	553082	both	5856.8	6487.78	4282.68	1.24939	0.00172482	2.76326	2666.10524947487	3167.86039279653	2134.05906335694	1.42977	0.00018454	3.73391
klhl4	ENSDARG00000016531	559349	both	434.305	201.352	351.118	3.03875	6.60053e-08	7.18042	432.367651609445	208.933693082153	356.318525921511	2.78968	1.52606e-07	6.81643
kpnb1	ENSDARG00000104889	570700	Ens95	4117.64	3597.22	3412.1	1.03252	0.0166352	1.77897	340.06444508608	490.413807373386	1537.94779972068	0.486563	0.67568	0.170259
kras	ENSDARG00000010844	445289	Ens95	531.465	783.141	241.454	1.5236	0.0220217	1.65715	1687.6912603272	2063.22021918626	2076.27768077507	0.60635	0.204757	0.688762
krt18a.1	ENSDARG00000018404	352912	both	37531	39625.6	25853.8	2.64567	1.35719e-07	6.86736	37323.5302672477	39531.0285596362	26041.1061066042	2.64782	8.35544e-08	7.07803
krt5	ENSDARG00000058371	797351	both	5531.32	2750.19	3444.8	1.64159	0.000943956	3.02505	5509.0440103945	2750.96029224834	3492.88457707383	1.62998	0.000790695	3.10199
krt8	ENSDARG00000058358	797433	both	86392.7	89128.1	46148.4	2.36819	4.91114e-07	6.30882	85886.6762509404	88886.7771222141	46390.7460288946	2.37015	2.89444e-07	6.53844
krt94	ENSDARG00000044975	768289	both	28655.4	24737.2	13490.6	3.59922	7.88574e-07	6.10316	28112.6418689161	24389.1395248768	13535.2888698022	3.5954	7.69757e-07	6.11365
ksr1b	ENSDARG00000030933	556779	both	421.674	568.237	468.478	2.18179	2.7334e-07	6.5633	316.745740280177	361.764820429283	385.209217212444	1.91117	4.67661e-06	5.33007
ktn1	ENSDARG00000032802	368207	RefSeq	2019.96	2334.9	1658.43	0.908445	0.0257699	1.58889	2898.32068483365	3430.96208038146	2204.35974549821	1.03564	0.0096889	2.01373
l2hgdh	ENSDARG00000060500	566872	Ens95	693.722	882.849	526.196	1.94614	0.000208658	3.68057	145.741905036891	396.587102609641	275.424590306897	1.3135	0.0571719	1.24282
lama4	ENSDARG00000020785	566796	both	3432.66	5031.85	2800.28	1.43547	0.00145906	2.83593	3414.24702866424	5020.21234766839	2820.69449303812	1.43644	0.00103006	2.98714
lamb1b	ENSDARG00000045524	556605	both	1617.71	1751.18	806.128	2.48167	1.81752e-07	6.74052	1608.99063160728	1746.91782271466	811.828425275225	2.48484	1.06194e-07	6.9739
lamp2	ENSDARG00000014914	541406	both	1606.05	1906.06	1567.04	1.72866	1.02141e-06	5.9908	1852.86541936901	2121.25735615352	2073.38861164598	1.42589	0.000151136	3.82063
larp6a	ENSDARG00000005355	334471	both	505.232	705.699	738.79	1.18122	0.0104251	1.98192	502.323766027153	704.183928536144	743.453789220016	1.18316	0.00837516	2.07701
lasp1	ENSDARG00000057867	323216	both	6938.19	7680.4	5261.96	1.39759	0.00137865	2.86055	6900.39339714669	7631.88351119529	5274.47720668139	1.40493	0.000914893	3.03863
lcp1	ENSDARG00000023188	30583	Ens95	963.827	850.904	2569.41	2.08701	0.00950469	2.02206	94.2464319238565	77.3828492896861	688.561475767243	2.00103	0.0781824	1.10689
lcp2a	ENSDARG00000055955	336073	both	403.214	436.584	477.135	2.45167	0.00115013	2.93925	432.367651609445	445.918669031816	496.919890204052	2.497	0.00084198	3.0747
ldb2a	ENSDARG00000019579	30577	both	10507.9	8539.05	4248.04	3.9072	5.15236e-16	15.288	4586.9835578611	3600.23706320265	2426.8180684384	3.80234	3.99277e-17	16.3987
lepb	ENSDARG00000045548	564348	both	29.148	100.676	25.9731	3.00566	0.0303249	1.5182	29.1483810073783	100.597704076592	26.00162216184	3.00552	0.0298932	1.52443
letmd1	ENSDARG00000030641	567014	RefSeq	51.4948	82.2831	68.2996	1.55555	0.0802537	1.09553	1192.16878320177	944.070761334171	580.702894947759	2.24216	1.07913e-06	5.96693
lgals9l3	ENSDARG00000041060	327284	both	589.761	826.703	323.221	1.34654	0.0427204	1.36937	585.882458248304	824.127344935157	325.501788544515	1.34544	0.036481	1.43793
lgmn	ENSDARG00000039150	406625	both	3287.89	5675.6	4816.57	1.92187	1.45221e-06	5.83797	3232.55545371825	5648.94799814709	4850.7470677477	1.93745	9.23758e-07	6.03444
lhx8a	ENSDARG00000002330	378959	both	2326.01	3408.46	1337.13	3.60795	8.30115e-13	12.0809	2314.38145198584	3389.36879888825	1343.4171450284	3.61014	4.398e-13	12.3567
lifrb	ENSDARG00000039863	565104	both	3477.36	4248.71	1365.99	3.05695	1.69272e-05	4.77142	2878.88843082873	3582.82592211247	1302.00715417806	2.9566	2.20037e-05	4.65751
lima1a	ENSDARG00000101441	64000	both	2415.4	2786.01	2345.27	1.11841	0.0392504	1.40616	2402.79820770822	2779.97886073197	2362.29552455531	1.12051	0.0315951	1.50038
limch1b	ENSDARG00000103774	557200	both	12304.3	13427.6	8213.27	3.6817	1.57599e-21	20.8024	12187.9097118851	13412.3823531348	8346.52071395063	3.66764	1.31672e-22	21.8805
lims1	ENSDARG00000026985	554019	both	3497.76	5348.4	4993.57	1.34378	0.00457265	2.33983	3477.40185418023	5324.90731674653	5023.12819245027	1.35161	0.00338442	2.47052
lipeb	ENSDARG00000101145	557893	both	552.84	318.484	269.351	2.19543	0.000111817	3.95149	549.932788339204	364.666677277646	278.313659435991	2.04703	8.27462e-05	4.08225
litaf	ENSDARG00000103483	431731	both	2195.82	2384.27	1825.81	2.0243	5.21999e-06	5.28233	2831.27940851668	2983.1088401174	1849.00424261973	2.12461	3.69416e-06	5.43248
lmcd1	ENSDARG00000002002	394045	both	432.362	670.849	254.921	1.37704	0.0430955	1.36557	429.452813508707	670.328931971906	257.127152489306	1.37074	0.0381661	1.41832
lmo2	ENSDARG00000095019	30332	both	2222.05	2266.17	1840.24	4.78003	2.42483e-17	16.6153	2208.47566765903	2259.57919925883	1853.81935783489	4.79657	1.11117e-17	16.9542
lmo4a	ENSDARG00000013853	114412	both	1597.31	1806.36	2114.4	1.26812	0.00162873	2.78815	1510.85774888244	1775.9363911983	2105.16837206601	1.26951	0.0013726	2.86246
lmo7a	ENSDARG00000004930	553341	both	1188.27	1555.63	895.591	1.41162	0.00897326	2.04705	1152.33266249169	1512.83470361336	903.315614363181	1.43508	0.00495994	2.30452
lnx2b	ENSDARG00000071478	564464	both	487.743	685.37	626.24	1.68656	0.00452025	2.34484	484.834737422726	683.870930597601	630.780093185377	1.69665	0.00384932	2.41462
loxl1	ENSDARG00000054451	560115	both	3504.56	3633.04	3293.77	1.36011	0.00183101	2.73731	367.269600692967	228.279405404574	250.385991188088	1.61101	0.0166525	1.77852
loxl3b	ENSDARG00000039563	336266	both	1501.12	2390.08	1098.57	1.97779	0.000123861	3.90707	1499.19839647949	2384.35904373845	1116.14370687306	1.96992	9.49159e-05	4.02266
lpar2a	ENSDARG00000042338	445184	both	1684.75	1406.56	718.589	2.72028	5.10966e-08	7.29161	1637.16739991441	1388.05485913374	704.932867498772	2.84838	9.98073e-09	8.00084
lpar5a	ENSDARG00000010384	322473	both	206.951	69.6986	310.715	2.17984	0.0112735	1.94794	205.98189245214	69.6445643607175	312.982488985111	2.18297	0.0106957	1.97079
lpar6a	ENSDARG00000062552	571773	both	642.227	821.863	1127.42	1.72221	0.000169737	3.77022	609.201163054206	798.977918916009	1131.55207556155	1.71124	0.000247596	3.60626
lpl	ENSDARG00000087697	30354	both	12846.5	10329.9	8934.75	2.06401	1.1579e-08	7.93633	1226.17522771038	853.14591341879	1587.06197491527	1.62253	0.00521987	2.28234
lpp	ENSDARG00000023578	573024	both	2685.5	3004.79	1874.87	1.51832	0.00152385	2.81706	1067.80235757029	1330.01772216648	646.188461873874	1.68697	0.00515702	2.2876
lpxn	ENSDARG00000079315	560743	RefSeq	15.5456	54.21	197.203	2.2744	0.0819143	1.08664	112.707073228529	97.6958472282287	310.093419856017	1.79386	0.0258524	1.5875
lratb.2	ENSDARG00000077652	556575	Ens95	138.939	629.224	825.367	2.02429	0.0175835	1.75489	35.9496699090999	177.980553366278	413.136885460346	1.9306	0.0677428	1.16914
lrba	ENSDARG00000031108	562379	both	2724.37	2650.48	1770.98	1.46699	0.000375725	3.42513	2697.19685588274	2661.00272994908	1789.2968139518	1.46897	0.000215797	3.66596
lrch1	ENSDARG00000078778	560885	both	2768.09	2574.01	1002.37	3.02181	6.62979e-08	7.1785	2682.62266537905	2560.40502587249	989.024665192949	3.0249	5.12878e-08	7.28999
lrp10	ENSDARG00000054539	560361	both	2001.5	2353.3	1313.08	1.57632	0.000301999	3.51999	1990.83442280394	2347.60219032585	1322.23063808171	1.57533	0.000202445	3.69369
lrrc15	ENSDARG00000070792	791200	both	1121.23	1773.44	1932.59	4.29437	1.55661e-20	19.8078	1127.07073228529	1760.45982134036	1943.38050083678	4.34773	2.04574e-20	19.6891
lrrc8c	ENSDARG00000099911	571216	RefSeq	173.916	249.753	120.246	1.52423	0.0594033	1.22619	1106.66686558013	1407.40057145617	985.172573020825	1.49997	0.000156897	3.80439
lrrc8da	ENSDARG00000103370	497399	Ens95	379.896	325.26	264.541	1.51651	0.00141918	2.84796	87.4451430221349	48.3642808060538	57.7813825818666	0.956113	0.294927	0.530285
lrrfip1a	ENSDARG00000030012	407677	both	2585.43	2793.75	1817.15	1.9893	3.69667e-07	6.43219	2693.31040508175	2855.42713878942	1841.30005827548	2.00632	1.6827e-07	6.77399
lta4h	ENSDARG00000006029	406575	both	729.671	765.717	1090.87	1.3801	0.00962972	2.01639	725.79468708372	764.155636735651	1098.8092920985	1.38431	0.00818987	2.08672
lurap1	ENSDARG00000115301	100126029	RefSeq	376.009	461.753	323.221	0.594337	0.471055	0.326928	167.117384442302	103.499560924955	63.5595208400532	1.92331	0.0137419	1.86195
luzp1	ENSDARG00000075556	558606	both	3360.76	3761.79	2365.48	1.51164	0.000235264	3.62844	3342.34768884604	3791.75961519462	2384.44505454503	1.51343	0.000144466	3.84023
lygl1	ENSDARG00000056874	436979	both	724.813	558.557	258.769	1.80551	0.0179413	1.74615	799.637252302411	565.86208543083	278.313659435991	1.87286	0.0120701	1.91829
lygl2	ENSDARG00000099562	100322265	both	102.99	163.598	263.579	5.50978	4.77954e-09	8.32061	133.110939933694	174.111410901794	301.426212468737	5.12357	1.19763e-07	6.92168
lyn	ENSDARG00000067916	447804	RefSeq	864.724	497.571	419.417	0.994327	0.106044	0.974512	601.428261452239	295.022112916928	145.416479497698	2.38629	0.00186116	2.73022
lypla2	ENSDARG00000053656	393722	Ens95	537.295	483.05	575.256	1.03513	0.0135098	1.86935	1425.3558312608	1773.03453434993	1886.56214129794	0.440364	0.391119	0.407691
lysmd4	ENSDARG00000068702	100149102	both	327.429	559.525	176.04	1.65738	0.0114572	1.94092	325.490254582391	560.058371734103	177.196239917724	1.59221	0.0138953	1.85713
lyve1a	ENSDARG00000075833	560618	both	1900.45	1609.84	684.92	5.72314	1.25324e-19	18.902	1890.75831467861	1603.75955152875	689.524498810274	5.81057	8.04365e-20	19.0945
lyve1b	ENSDARG00000062483	564249	both	2765.17	3099.65	2166.35	6.0897	2.27758e-18	17.6425	2750.63555439626	3092.41211473908	2182.21021550849	6.08847	2.27699e-18	17.6426
lyz	ENSDARG00000057789	677744	both	3284.98	2303.93	4378.87	3.98863	2.77317e-06	5.55702	3268.50512362735	2299.2379095198	4408.71949099642	3.98315	2.08043e-06	5.68185
lzts2b	ENSDARG00000077207	100005471	both	136.996	174.247	76.9573	1.7147	0.0415557	1.38137	259.420590965667	236.017690333543	107.858580819484	2.19427	0.0042943	2.36711
macf1a	ENSDARG00000028533	562190	both	4391.63	4619.47	2251.96	1.80416	9.36614e-05	4.02844	11876.9936478064	11616.132963998	6266.39094100343	2.18187	2.06304e-07	6.68549
mafba	ENSDARG00000017121	30210	both	2489.24	2614.67	1502.59	1.13138	0.0202657	1.69324	2475.66916022666	2608.76930667854	1513.8722236449	1.13164	0.0154824	1.81016
mafbb	ENSDARG00000070542	114463	both	1099.85	823.799	966.776	1.40133	0.00293271	2.53273	1094.03590047693	822.192773702915	973.616296504452	1.40516	0.00224303	2.64917
magi3a	ENSDARG00000101869	561689	RefSeq	78.6996	190.703	132.751	0.454758	0.654134	0.184333	1110.55331638111	1113.34574415536	863.831669598905	1.07902	0.0145054	1.83847
man2a1	ENSDARG00000102200	560219	Ens95	144.768	126.813	209.709	1.47389	0.0192425	1.71574	104.934171626562	118.008845166771	194.530654692284	1.27696	0.0664551	1.17747
mao	ENSDARG00000023712	404730	both	2020.93	2927.34	1254.4	2.00514	0.000248625	3.60445	2010.26667680886	2920.23527506953	1263.48623245682	2.00496	0.000193761	3.71273
map3k1	ENSDARG00000098405	100334486	RefSeq	245.815	334.941	143.333	1.30248	0.0680387	1.16724	1094.03590047693	1171.38288112262	966.875135203234	1.80274	1.38078e-05	4.85988
MAP3K11	ENSDARG00000091521	101886393	RefSeq	151.57	87.1233	31.7449	1.76657	0.0828918	1.08149	1090.14944967595	867.655197660606	472.844314128275	1.98077	6.72744e-05	4.17215
map3k14a	ENSDARG00000074060	100004261	both	1080.42	1231.34	755.144	1.36845	0.0052564	2.27931	1074.60364647201	1236.19101740274	767.529365295794	1.36936	0.00373848	2.4273
map3k3	ENSDARG00000060348	560211	RefSeq	257.474	237.169	174.116	1.21609	0.0742895	1.12907	1733.35705723876	1336.78872147933	998.65489562326	1.50942	0.00499046	2.30186
map4k2	ENSDARG00000001234	678610	both	3430.72	4340.68	1825.81	4.64303	4.58559e-17	16.3386	3412.30380326375	4323.76670406121	1824.92866654395	4.64121	3.99277e-17	16.3987
map4k5	ENSDARG00000039125	334565	both	910.389	897.37	935.032	1.35184	0.0010971	2.95975	826.842407909298	844.4403428737	926.428167395927	1.27874	0.0024225	2.61574
map7d1b	ENSDARG00000104701	796270	both	3457.92	2515.93	1404.47	2.10296	9.68967e-05	4.01369	1612.87708240827	1585.38112482244	889.833291760745	2.22521	5.01696e-07	6.29956
mapk3	ENSDARG00000070573	399480	RefSeq	605.307	656.329	419.417	1.05104	0.0514507	1.28861	600.456648751993	654.852362113969	422.767115890657	1.06607	0.0422066	1.37462
mapkapk3	ENSDARG00000111612	790934	both	664.574	512.091	335.726	1.39807	0.0156178	1.80638	434.310877009937	375.306819054978	202.234839036533	2.23354	0.00012707	3.89596
mapre1a	ENSDARG00000042927	334135	both	602.392	745.388	614.697	1.51284	0.00904965	2.04337	683.043728272898	814.454488773947	574.924756689572	1.56944	0.00737464	2.13226
march5l	ENSDARG00000028559	326067	both	606.278	632.128	417.493	1.17865	0.0337263	1.47203	588.797296349042	630.670221710942	419.878046761564	1.17762	0.0293378	1.53257
marcksl1a	ENSDARG00000039034	406407	both	17962	23070.2	13352.1	1.32252	0.00213119	2.67138	17866.0143321224	23003.9865225914	13448.6167959294	1.32257	0.00148157	2.82928
marveld1	ENSDARG00000011724	497317	RefSeq	735.501	827.671	459.82	1.4066	0.0568743	1.24508	731.624363285195	825.094630551278	463.214083697964	1.40663	0.0489683	1.31009
marveld2a	ENSDARG00000025076	558720	both	613.079	723.123	515.614	1.05415	0.0358752	1.44521	543.131499437482	731.267925787534	501.735005419208	1.10823	0.0259493	1.58587
mb	ENSDARG00000031952	393558	both	910.389	1868.31	2214.45	2.19168	1.75895e-05	4.75475	905.543036629219	1863.95938226531	2227.47229853096	2.19803	1.38712e-05	4.85789
mbd2	ENSDARG00000075952	337105	both	726.757	420.128	263.579	1.62142	0.029736	1.52672	619.888902756912	380.143247135583	262.905290747493	1.557	0.0285718	1.54406
mbnl2	ENSDARG00000018460	560384	both	7782.51	7056.02	3535.23	1.23854	0.0156362	1.80587	7757.35579876361	7058.2831408355	3594.0019965921	1.23534	0.011903	1.92434
mcamb	ENSDARG00000005368	338313	both	6796.34	8248.64	5930.52	3.98181	1.227e-24	23.9112	6759.50955561103	8251.9135911289	6024.67215720262	3.98496	1.7026e-25	24.7689
mcc	ENSDARG00000105237	100537329	both	1510.84	1498.52	811.9	3.15506	2.34887e-07	6.62914	1953.91314019459	1968.42622880639	989.98768823598	3.17735	4.9814e-08	7.30265
mcf2l2	ENSDARG00000079742	100149630	both	982.287	1599.2	644.518	2.12727	5.04553e-05	4.29709	706.362433078801	1224.58359000928	465.140129784026	2.33513	2.1915e-05	4.65926
mcl1b	ENSDARG00000008363	373102	both	6854.64	6989.22	3974.85	1.61411	0.000915463	3.03836	4824.05705672111	4683.59695325825	3334.94879801673	1.56	0.00179192	2.74668
mctp1a	ENSDARG00000076404	103911113	both	590.733	385.279	489.641	1.05956	0.0240335	1.61918	586.85407094855	383.045103983946	499.808959333146	1.09177	0.0155626	1.80792
mcu	ENSDARG00000101175	768182	RefSeq	89.3872	101.644	143.333	0.823165	0.33592	0.473764	1186.3391070003	1110.443887307	530.625696710141	1.306	0.0346632	1.46013
MCUR1	ENSDARG00000016964	550408	both	313.827	322.356	282.818	1.31765	0.0179109	1.74688	311.887676778948	314.36782523935	285.054820737208	1.31701	0.0146787	1.83331
MDFIC	ENSDARG00000074223	100150512	Ens95	1296.11	1323.31	598.343	1.28448	0.0193472	1.71338	0.971612700245943	38.6914246448431	25.0385991188088	0.154814	0.955232	0.0198911
mecom	ENSDARG00000060808	497407	RefSeq	171.973	143.269	108.702	1.17364	0.111944	0.950998	673.327601270439	553.287372421256	239.792737714746	1.78876	0.00528226	2.27718
mef2aa	ENSDARG00000031756	30564	both	5007.63	4751.12	2402.99	2.44038	5.76174e-07	6.23945	16290.0585323235	13808.0021701284	8542.01439168594	2.12093	3.75588e-06	5.42529
mef2ca	ENSDARG00000029764	30575	both	2737	2362.01	1062.97	2.37045	2.10183e-05	4.6774	315.774127579932	431.40938479	215.717161638969	1.63439	0.0145269	1.83783
mef2cb	ENSDARG00000009418	798771	both	2091.85	2560.46	2208.68	1.48095	0.000441631	3.35494	2051.07441021919	2528.48460054049	2198.58160724002	1.5425	0.000116762	3.9327
meox2a	ENSDARG00000040911	556898	RefSeq	72.87	71.6347	63.4898	1.7437	0.140883	0.851141	322.575416481653	384.979675216188	370.763871566977	1.11381	0.0489085	1.31062
MEPCE	ENSDARG00000059461	561384	Ens95	1611.88	1436.57	1482.39	1.20563	0.00409203	2.38806	748.141779189376	302.760397845897	903.315614363181	0.720451	0.431713	0.364805
mertka	ENSDARG00000074695	100322133	RefSeq	1237.82	1343.63	818.634	1.02435	0.0513341	1.28959	296.341873575013	488.479236141144	437.212461536124	1.25664	0.0429908	1.36662
metap2b	ENSDARG00000102571	323452	both	2893.42	2870.23	1937.4	1.00043	0.0409689	1.38755	1386.49132325096	1341.62514955993	596.111263636257	1.72048	0.00118876	2.92491
mfhas1	ENSDARG00000079104	797005	both	745.217	625.352	395.368	1.40315	0.00714938	2.14573	741.340490287655	634.539364175426	403.506655030035	1.39539	0.00582581	2.23464
mfng	ENSDARG00000042925	493633	both	1762.48	2166.47	714.741	4.4479	4.02909e-11	10.3948	1752.78931124368	2161.88335203061	719.378213144239	4.45152	3.65227e-11	10.4374
mgat1a	ENSDARG00000012407	393649	RefSeq	961.884	866.393	746.486	1.07871	0.0527286	1.27795	956.066897042008	864.753340812242	752.120996607296	1.07916	0.0433077	1.36344
mgat1b	ENSDARG00000036065	558524	both	1464.2	1349.44	904.249	2.42702	3.43572e-09	8.46398	1419.52615505932	1346.46157764054	903.315614363181	2.46581	1.14108e-09	8.94268
mibp2	ENSDARG00000101844	386710	RefSeq	16418.1	15167.2	11611.9	1.23325	0.0515778	1.28754	16253.1372497141	15234.748453907	13716.3372018921	1.20611	0.0398684	1.39937
mical2a	ENSDARG00000075608	569607	both	97.16	193.607	63.4898	1.7731	0.0310716	1.50764	124.366425631481	206.031836233789	90.5241660449243	1.64455	0.0158494	1.79999
micall2a	ENSDARG00000102366	327198	both	2120.03	2574.98	839.797	5.46829	4.90814e-19	18.3091	2108.3995595337	2569.11059641758	848.423300910407	5.44374	6.0344e-19	18.2194
mid2	ENSDARG00000034871	799891	RefSeq	69.9552	119.068	139.485	0.820568	0.345251	0.461865	1280.58553892415	1726.60482477612	1382.90108979267	1.54761	3.73672e-05	4.42751
midn	ENSDARG00000018524	323713	both	16226.7	22169	12129.4	1.44108	0.00542531	2.26558	16926.4648509846	22812.4639705995	12508.7063059311	1.46007	0.00370802	2.43086
mipol1	ENSDARG00000104845	321390	both	259.417	313.644	260.693	1.09869	0.0257863	1.58861	258.448978265421	324.040681400561	267.720405962648	1.10214	0.0236149	1.62681
mlnl	ENSDARG00000092916	100333520	both	216.667	140.365	60.6039	3.36271	0.000770743	3.11309	215.698019454599	140.256414337556	62.5964977970221	3.33148	0.000716125	3.14501
mmel1	ENSDARG00000105389	560703	both	2524.22	3794.7	1045.66	2.44615	5.16075e-05	4.28729	2510.64721743552	3778.21761656893	1053.54720907603	2.45445	3.82035e-05	4.4179
mmp15a	ENSDARG00000051962	561041	RefSeq	132.138	146.174	77.9193	1.24525	0.122658	0.911302	1949.05507669336	2046.7763637122	865.757715684967	1.38778	0.00820243	2.08606
mmp25a	ENSDARG00000077290	100001739	both	85.5008	136.493	95.2347	3.54697	4.70446e-06	5.32749	216.669632154845	365.633962893767	200.308792950471	4.4861	6.99218e-09	8.15539
mmp25b	ENSDARG00000010556	100333601	RefSeq	1.9432	17.4247	36.5547	1.32513	0.609867	0.214765	139.912228835416	116.074273934529	235.940645542622	2.05657	0.00251874	2.59882
mmrn2a	ENSDARG00000076135	100148368	both	1020.18	1055.16	1111.07	2.65962	6.29361e-07	6.2011	2698.16846858298	3393.23794135274	2345.92413282378	3.0375	2.15989e-10	9.66557
mob1a	ENSDARG00000102320	100005014	both	1442.83	1640.82	1563.2	1.71316	3.59984e-06	5.44372	1435.07195826326	1632.77812001238	1574.54267535586	1.71382	1.95267e-06	5.70937
mob2b	ENSDARG00000012005	724012	both	4567.49	4049.3	2504.96	2.68374	3.06013e-09	8.51426	4542.28937364978	4042.28658976998	2523.12037274151	2.67799	1.75995e-09	8.7545
mob3c	ENSDARG00000043705	431738	both	800.598	607.927	399.216	2.37372	2.03962e-05	4.69045	795.750801501427	606.488081307915	402.543631987004	2.34388	1.46611e-05	4.83383
mpeg1.2	ENSDARG00000043093	553612	both	325.486	143.269	197.203	1.65063	0.00709997	2.14874	323.547029181899	143.158271185919	198.382746864409	1.65537	0.00606219	2.21737
mpp1	ENSDARG00000105287	325542	both	1011.44	822.831	556.017	1.18443	0.0133252	1.87533	926.91851603463	699.347500455538	472.844314128275	1.3222	0.00654085	2.18437
mpp7a	ENSDARG00000102470	30166	both	558.67	636.968	306.867	1.79539	0.000408642	3.38866	555.76246454068	645.179505952758	309.130396812986	1.79296	0.000345165	3.46197
mpped2a	ENSDARG00000006889	550430	both	1267.94	1612.75	1079.33	1.59815	0.000148222	3.82909	390.588305498869	409.161815619215	212.828092509875	1.82461	0.000853946	3.06857
MPRIP	ENSDARG00000102081	558831	RefSeq	279.821	315.58	408.836	-0.432138	0.55093	0.258904	3670.75278152917	3992.9550233478	1981.90142255802	1.87068	1.98482e-05	4.70228
mprip	ENSDARG00000102081	558831	both	3644.47	3971.85	1967.22	1.89671	2.26495e-05	4.64494	3670.75278152917	3992.9550233478	1981.90142255802	1.87068	1.98482e-05	4.70228
mras	ENSDARG00000062865	100317924	both	1960.69	1738.59	979.282	2.29967	9.94752e-05	4.00229	1950.02668939361	1731.44125285673	985.172573020825	2.29865	8.10186e-05	4.09142
mrc1a	ENSDARG00000102100	100286774	both	140.882	326.228	950.423	4.2291	4.36334e-07	6.36018	2137.54794054108	3363.25208725298	3861.72240255475	4.88424	1.27827e-11	10.8934
mrtfbb	ENSDARG00000076867	557356	both	1539.01	1040.64	514.652	1.98685	0.000330883	3.48033	1535.14806638859	1037.89746609792	518.106397150737	1.97296	0.000295833	3.52895
msi2a	ENSDARG00000033901	100002680	Ens95	436.248	619.543	559.865	1.15606	0.0280288	1.5524	952.180446241024	1379.34928858866	1196.07461944464	0.993649	0.0828032	1.08195
msna	ENSDARG00000058128	286739	both	28276.5	33614.1	21883.8	2.53852	5.57855e-09	8.25348	28136.9321864223	33531.9231684532	21978.111888056	2.54216	2.64473e-09	8.57762
mtm1	ENSDARG00000037560	560881	RefSeq	101.046	85.1872	44.2505	0.704112	0.510837	0.291718	660.696636167241	607.455366924036	554.701272785919	1.00606	0.0138705	1.85791
mtmr12	ENSDARG00000059817	569130	RefSeq	45.6652	71.6347	57.718	1.00265	0.532526	0.273659	1954.88475289484	2276.99034034901	1503.27897017156	1.90256	1.17343e-05	4.93054
mtmr14	ENSDARG00000059642	323929	both	1256.28	1438.5	1112.03	1.64129	1.50127e-05	4.82354	1230.06167851136	1421.90985569798	1125.77393730337	1.65204	6.91866e-06	5.15998
mtmr2	ENSDARG00000004616	30644	RefSeq	220.553	251.689	413.646	0.983226	0.138228	0.859403	924.975290634138	1463.50313719119	778.122618769136	1.54859	0.00629915	2.20072
mtmr8	ENSDARG00000008592	393365	both	535.351	971.909	577.18	1.49332	0.00463163	2.33427	532.443759734777	947.939903798655	574.924756689572	1.50161	0.00323804	2.48972
mtss1la	ENSDARG00000028943	560413	both	201.121	271.05	125.056	1.99069	0.0038101	2.41906	4258.57846517797	5110.16990996765	2604.97733139915	2.18154	6.22584e-07	6.2058
mvp	ENSDARG00000021242	373081	both	9208.82	7752.04	5471.67	1.36501	0.0320714	1.49388	9566.49864662156	8053.62003982408	5615.3873639144	1.37765	0.0254823	1.59376
MYADM	ENSDARG00000086815	100005501	Ens95	755.905	1370.74	978.32	2.08807	1.02675e-06	5.98854	0	15.4765698579372	13.4823226024355	-0.623391	1	0
myct1a	ENSDARG00000056125	796556	both	1496.26	2436.55	1510.29	5.44836	3.29925e-12	11.4816	204.038667051648	254.396117039843	557.590341915012	4.82507	2.11255e-10	9.67519
myct1b	ENSDARG00000088546	100537522	both	599.477	700.858	259.731	5.95314	1.20005e-18	17.9208	670.412763169701	756.417351806682	288.906912909333	6.0357	2.19208e-19	18.6591
myh11a	ENSDARG00000009782	554168	both	1829.52	1521.75	1665.16	3.46282	1.4296e-16	15.8448	1819.83058756065	1523.4748453907	1688.17939443353	3.46122	7.23101e-17	16.1408
myh9b	ENSDARG00000001014	561431	both	794.769	539.196	294.362	2.50467	2.65619e-05	4.57574	784.091449098476	529.105232018229	303.352258554799	2.79696	2.03676e-06	5.69106
myl12.1	ENSDARG00000099766	326719	both	9285.58	13064.6	12229.5	1.41287	0.00267262	2.57306	9236.15032853794	13034.1736772315	12318.0277434109	1.41496	0.00205034	2.68817
myl6	ENSDARG00000008494	798632	both	1437.97	1683.42	1297.69	1.49611	5.65198e-05	4.2478	1431.18550746227	1679.20782958619	1306.82226939322	1.50271	3.06975e-05	4.5129
myl9a	ENSDARG00000038123	450006	both	5219.43	7245.75	4046.03	4.42972	1.21602e-14	13.9151	5831.61942687615	7726.67750157516	4203.59558283079	4.52831	7.34289e-15	14.1341
myl9b	ENSDARG00000008030	406493	both	3058.6	2676.62	783.041	2.14306	0.00485038	2.31422	3003.25485646021	2655.19901625236	788.715872242479	2.14474	0.00401987	2.39579
mylk5	ENSDARG00000075164	100003770	both	2184.16	3080.29	2434.74	3.26187	4.47818e-16	15.3489	2176.41244855091	3075.0009736489	2457.63480581539	3.26394	2.93145e-16	15.5329
myo10l3	ENSDARG00000074143	555290	both	318.685	460.785	202.013	1.60026	0.00875218	2.05788	1505.99968538121	1906.51994937464	1446.46061063273	1.17408	0.00585475	2.23249
myo18ab	ENSDARG00000061862	559005	both	3719.28	3974.76	2935.92	1.63135	1.23982e-05	4.90664	3874.79144858082	4256.05671093274	3010.41003251525	1.68755	5.63286e-06	5.24927
myo1ca	ENSDARG00000020924	567536	both	4307.1	5082.19	2703.13	3.50668	2.38209e-10	9.62304	4400.43391941388	5123.71190859334	2727.2812578641	3.52163	1.59944e-10	9.79603
myo1cb	ENSDARG00000061579	566459	both	5253.44	5020.24	1470.85	2.48243	2.68906e-05	4.5704	5225.33310192268	5008.60492027493	1481.12944018185	2.47811	2.13858e-05	4.66987
MYO1D	ENSDARG00000036863	559562	both	2149.18	1972.86	861.922	1.73543	0.00101467	2.99368	2138.51955324132	1968.42622880639	867.68376177103	1.73464	0.000777011	3.10957
myo1ea	ENSDARG00000036179	555285	both	643.199	817.991	559.865	1.32161	0.00324716	2.4885	639.321156761831	816.389060006189	564.33150321623	1.33852	0.00250873	2.60055
myo1hb	ENSDARG00000078603	796782	both	83.5576	21.2968	25.9731	3.49108	0.0116227	1.93469	943.435931938811	280.512828675112	288.906912909333	4.32481	6.93231e-09	8.15912
myofl	ENSDARG00000017128	559066	both	238.042	286.539	335.726	1.77851	0.000222222	3.65321	856.962401616922	837.669343560852	651.00357708903	2.20131	5.2795e-07	6.27741
myrfl	ENSDARG00000101645	100329855	both	1096.94	1854.76	1803.69	6.56161	7.91795e-32	31.1014	1286.41521512563	2124.15921300188	2439.3373679978	6.56172	7.14917e-22	21.1457
n4bp1	ENSDARG00000057491	327327	both	2531.99	1767.63	1919.12	2.22343	5.18893e-06	5.28492	2518.42011903748	1764.32896380484	1932.78724736344	2.22412	3.5644e-06	5.44801
nab1a	ENSDARG00000042940	565795	both	1346.64	755.068	1436.22	2.342	1.67057e-05	4.77713	1339.85391363916	755.450066190561	1448.38665671879	2.33074	1.19265e-05	4.92349
nap1l1	ENSDARG00000101813	368260	RefSeq	846.263	1055.16	772.459	0.985809	0.0696403	1.15714	11160.9150877251	11590.9835379789	9499.25929645886	1.00403	0.0206202	1.68571
napab	ENSDARG00000020405	327082	both	1107.62	1199.4	944.651	1.11472	0.0207296	1.68341	1101.8088020789	1184.92487974832	951.466766514736	1.11735	0.0154178	1.81198
napga	ENSDARG00000006617	541353	both	1659.49	2794.72	875.39	3.05304	6.74787e-08	7.17083	1931.56604808894	3045.98240516527	1125.77393730337	2.27969	5.44054e-06	5.26436
natd1	ENSDARG00000038281	100002945	Ens95	1176.61	1156.8	440.581	1.47463	0.0127566	1.89426	76.7574033194295	83.1865629864126	8.66720738727999	2.44221	0.0684629	1.16454
ncam3	ENSDARG00000089586	566122	both	5138.79	7052.15	4019.1	9.12495	1.97264e-31	30.705	18870.6618641767	20207.5638063854	10826.3050497557	8.7699	1.82246e-41	40.7393
nccrp1	ENSDARG00000035326	30078	both	1200.9	1115.18	729.171	1.28035	0.032714	1.48527	1194.11200860226	1112.37845853924	733.823558789705	1.27921	0.0271869	1.56564
nck1b	ENSDARG00000075369	100334953	both	3824.22	3447.18	2061.49	2.13419	1.06912e-06	5.97097	3815.52307386582	3437.73307969431	2078.20372686113	2.13936	5.55696e-07	6.25516
ndel1b	ENSDARG00000104225	333957	both	2522.27	3322.3	2085.54	1.89859	0.00119809	2.92151	2509.67560473527	3313.92052083081	2100.35325685085	1.89981	0.000985793	3.00621
ndfip1l	ENSDARG00000102367	436776	both	2685.5	2889.59	1418.9	1.257	0.0269475	1.56948	6538.9534726552	7066.98871138059	3948.39447642755	1.17526	0.0118855	1.92498
nfatc2a	ENSDARG00000100927	100333254	both	424.589	806.374	241.454	2.31719	0.000195107	3.70973	422.651524606985	812.519917541704	309.130396812986	2.17069	0.000157856	3.80174
nfatc3b	ENSDARG00000051729	566869	RefSeq	56.3528	41.6256	64.4518	0.207683	0.909571	0.0411636	613.08761385519	438.180384102848	325.501788544515	1.16539	0.0266625	1.5741
nfe2l2a	ENSDARG00000042824	360149	both	12594.8	10315.4	7985.28	1.90945	1.51253e-06	5.8203	12527.9741569712	10297.722669225	8042.20543235279	1.90993	7.553e-07	6.12188
nfkbiab	ENSDARG00000007693	323099	both	4585.95	5651.4	3836.32	1.23499	0.00793115	2.10066	4532.57324664732	5553.1867221511	3802.01497388682	1.27059	0.00478598	2.32003
nin	ENSDARG00000060298	571879	both	1340.81	1452.05	1091.83	1.37841	0.00106751	2.97163	1334.02423743768	1423.84442693022	1089.17906166818	1.41306	0.000483506	3.3156
NINJ1	ENSDARG00000103663	100150223	RefSeq	28.1764	16.4566	20.2013	0.640015	0.735995	0.133125	513.011505729858	492.348378605628	798.34610267279	1.28134	0.00607341	2.21657
nitr1m	ENSDARG00000087631	170971	RefSeq	0	16.4566	30.7829	0.749384	0.82289	0.0846583	25.2619302063945	79.3174205219283	43.3360369363999	2.44712	0.0272877	1.56403
nkain4	ENSDARG00000062699	100002876	RefSeq	11.6592	90.9954	45.2124	1.22989	0.447865	0.348853	142.827066936154	259.232545120449	134.823226024355	1.80862	0.0284017	1.54666
nkiras2	ENSDARG00000052594	445039	both	757.848	791.854	432.885	1.2997	0.0130668	1.88383	753.971455390852	785.435920290314	436.249438493093	1.31214	0.00927049	2.0329
nlrc3	ENSDARG00000103146	110437718	RefSeq	75.7848	90.9954	274.16	1.58173	0.114037	0.942956	236.101886159764	131.550843792466	418.915023718533	1.49524	0.0493044	1.30711
nocta	ENSDARG00000077726	572044	Ens95	2269.66	2725.02	1770.98	1.59081	0.0405331	1.39219	913.315938231187	916.01947846666	923.539098266834	1.38567	0.126544	0.897759
nos1apa	ENSDARG00000105071	553539	both	5679.97	5050.25	1715.19	2.74166	4.90141e-06	5.30968	3396.75800005982	2945.38470108868	683.746360552088	2.70372	0.000252947	3.59697
notch1a	ENSDARG00000103554	30718	both	6809.94	6692.04	4034.49	1.33023	0.00377136	2.4235	1685.74803492671	1308.73743861182	1121.92184513124	1.38017	0.00539143	2.2683
notch1b	ENSDARG00000052094	794892	both	1588.57	1701.81	746.486	1.75323	0.00264104	2.57822	8177.09248526986	7992.68104600846	6678.56480342074	1.33479	0.000415651	3.38127
notchl	ENSDARG00000088308	569522	both	2634.98	3328.11	2334.69	6.29647	4.24052e-46	45.3726	2705.94137018495	3351.64465985953	2374.81482411472	6.02201	1.6391e-41	40.7854
npl	ENSDARG00000009390	100148292	both	693.722	730.868	746.486	1.57989	3.68109e-05	4.43402	689.84501717462	724.496926474686	749.231927478203	1.60415	1.70734e-05	4.76768
nppb	ENSDARG00000052958	100334610	both	73.8416	223.616	41.3646	2.89584	0.00326998	2.48545	72.8709525184457	217.639263627242	41.4099908503377	3.06351	0.00162731	2.78853
npr1a	ENSDARG00000031751	560653	both	551.869	639.872	321.297	2.39409	4.63864e-06	5.33361	103.962558926316	206.031836233789	142.527410368604	1.8443	0.00897687	2.04687
nr4a1	ENSDARG00000000796	431720	both	8356.73	9116	12145.8	1.76611	0.0485431	1.31387	7924.47318320591	8469.55285475615	11842.2943601536	1.74035	0.0496164	1.30437
nr4a2b	ENSDARG00000044532	436679	both	2348.36	1511.1	1778.68	1.92598	0.00232505	2.63357	647.094058363798	419.801957396547	873.461900029216	1.93753	0.0228686	1.64076
nr5a2	ENSDARG00000100940	30749	both	802.541	528.548	494.451	1.27464	0.00816328	2.08814	797.694026901919	528.137946402108	498.845936290115	1.26119	0.00670706	2.17347
nrarpb	ENSDARG00000018958	353225	both	1377.73	1337.83	420.379	2.62395	3.28163e-05	4.48391	1369.97390734678	1334.85415024709	422.767115890657	2.62313	2.77714e-05	4.5564
nrp1a	ENSDARG00000102153	353246	both	2753.51	3506.23	1459.3	2.27071	2.80567e-06	5.55196	10644.9887438946	12054.3133481009	6784.49733815417	2.02337	1.69464e-07	6.77092
nrp1b	ENSDARG00000027290	402973	both	102.99	146.174	29.821	2.58289	0.0242153	1.61591	102.99094622607	146.060128034283	29.8537143339644	2.58267	0.0237447	1.62443
nrros	ENSDARG00000071491	445318	both	519.806	454.977	497.337	2.01207	8.74068e-06	5.05845	516.897956530842	454.624239576906	501.735005419208	2.01338	6.4062e-06	5.1934
ntmt1	ENSDARG00000022399	405834	both	501.345	558.557	314.563	1.22766	0.0144146	1.8412	504.266991427644	558.123800501861	321.649696372391	1.2141	0.0120439	1.91923
nuak1a	ENSDARG00000020086	561563	both	62.1824	133.589	60.6039	2.2917	0.0139861	1.8543	2761.32329409897	3859.4696083231	1413.71782716967	3.07499	2.38981e-09	8.62164
nuak2	ENSDARG00000063661	560275	both	1432.14	1060	1369.84	1.43489	0.03093	1.50962	1424.38421856055	1058.21046403646	1379.04899762055	1.43626	0.0266083	1.57498
nubp1	ENSDARG00000055472	503919	both	422.646	673.753	560.827	1.3434	0.0188734	1.72415	420.708299206493	672.263503204148	565.294526259261	1.34442	0.0162137	1.79012
numb	ENSDARG00000027279	692064	both	683.035	780.237	568.522	1.32237	0.0014673	2.83348	718.993398181998	792.206919603162	580.702894947759	1.32539	0.000901265	3.04515
nutf2l	ENSDARG00000014499	445204	both	2242.45	1901.22	1390.04	1.30763	0.0353689	1.45138	2252.1982391701	1910.38909183913	1400.23550456723	1.31725	0.0283182	1.54793
oaz2a	ENSDARG00000045929	100002007	both	19145.4	18454.6	8353.72	4.55833	1.55104e-17	16.8094	301.199937076242	275.676400594507	103.043465604329	3.38991	1.27095e-06	5.89587
oaz2b	ENSDARG00000059815	790945	both	1808.15	1505.3	663.757	2.99334	0.000337042	3.47232	1896.58799088008	1624.07254946729	707.821936627865	3.04305	0.00034345	3.46414
odc1	ENSDARG00000007377	114426	both	2302.69	2336.84	1712.3	1.74193	4.70446e-06	5.32749	2094.79698173025	2100.94435821498	1661.21474922866	1.74784	1.28768e-06	5.89019
ogfod1	ENSDARG00000036061	324573	RefSeq	184.604	272.018	306.867	1.10336	0.0519512	1.2844	331.319930783867	476.871808747691	310.093419856017	1.59614	0.00123404	2.90867
oit3	ENSDARG00000087227	100535938	both	139.91	71.6347	56.756	2.82571	0.0111132	1.95416	168.088997142548	100.597704076592	82.8199817006754	2.77274	0.01079	1.96698
oplah	ENSDARG00000045123	100151110	both	577.13	630.192	363.623	1.14466	0.0351862	1.45363	574.223105845352	626.801079246458	366.911779394853	1.16389	0.0275405	1.56003
optn	ENSDARG00000002663	336159	both	857.923	1307.82	618.545	2.03934	7.573e-05	4.12073	557.705689941171	1026.29003870446	593.222194507163	1.85065	0.00039227	3.40641
orai1a	ENSDARG00000011515	566671	both	622.795	605.023	303.981	3.15154	7.79833e-09	8.108	614.059226555436	603.586224459552	302.389235511768	3.20731	1.61923e-08	7.79069
osr2	ENSDARG00000038006	550389	both	374.066	439.489	361.699	1.67641	0.0016146	2.79194	390.588305498869	472.035380667085	421.804092847626	1.501	0.00341193	2.467
ostc	ENSDARG00000104901	393239	both	2926.46	3081.26	1943.17	1.17889	0.0152656	1.81629	2910.95164993685	3071.13183118442	1953.01073126709	1.18337	0.0113701	1.94424
ostf1	ENSDARG00000091555	405783	Ens95	534.38	686.338	606.039	1.46884	0.00309602	2.5092	35.9496699090999	39.6587102609641	35.631852592151	1.48612	0.159908	0.79613
otofa	ENSDARG00000030832	557476	both	991.032	1287.49	770.535	2.29954	8.22912e-06	5.08465	1454.50421226818	1598.92312344814	942.799559127456	2.65174	1.19988e-07	6.92086
oxsr1a	ENSDARG00000034189	568602	RefSeq	1841.18	2339.74	1452.57	0.766132	0.114918	0.939611	769.517258594787	926.659620243991	470.918268042213	1.17144	0.0243571	1.61337
p2rx1	ENSDARG00000016695	387296	both	359.492	272.018	466.554	1.59711	0.00310588	2.50782	39.8361207100837	37.724139028722	181.048332089849	2.33521	0.0486368	1.31303
p2rx4a	ENSDARG00000044752	259258	both	150.598	297.187	168.344	3.20529	1.97036e-07	6.70545	149.628355837875	297.923969765292	169.492055573475	3.22845	1.61051e-07	6.79304
pabpc1a	ENSDARG00000017219	606498	both	36569.1	34536.6	30215.4	1.14758	0.00739212	2.13123	37973.5391637122	36139.7251895157	32097.5580242269	1.14001	0.00499841	2.30117
pacsin2	ENSDARG00000078014	404601	both	628.625	687.306	269.351	1.78217	0.00392208	2.40648	532.443759734777	626.801079246458	211.865069466844	1.92491	0.00263229	2.57967
pak2a	ENSDARG00000068177	266749	both	1177.58	1311.69	1187.07	1.35109	0.00150869	2.8214	1148.4462116907	1286.48986944103	1196.07461944464	1.35083	0.00121656	2.91487
pald1a	ENSDARG00000098946	368369	both	702.467	660.201	868.656	2.25072	5.56092e-09	8.25485	2790.47167510635	2224.75691707848	1656.39963401351	2.94477	8.94346e-14	13.0485
palm1a	ENSDARG00000026882	550557	both	2597.09	3062.87	1302.5	3.07478	2.08039e-08	7.68185	2582.54655725372	3055.65526132648	1307.78529243625	3.07123	1.85493e-08	7.73167
palm1b	ENSDARG00000007818	393573	both	3330.64	3767.6	1753.67	1.80769	0.000593072	3.22689	3313.19930783867	3758.8719042465	1767.14728396209	1.80988	0.000440511	3.35604
palm2	ENSDARG00000069608	100002543	RefSeq	239.985	381.406	197.203	1.11788	0.187143	0.727827	7117.06302930153	8641.7296944257	4929.71495727625	2.86454	8.38214e-11	10.0766
palm3	ENSDARG00000071215	790940	both	459.567	434.648	194.317	2.10086	0.000207803	3.68235	565.478591543139	478.806379979933	217.643207725031	2.09043	0.000256727	3.59053
PAQR9	ENSDARG00000052059	101886606	both	1683.78	1584.68	921.564	2.24714	1.34006e-06	5.87288	1085.29138617472	735.137068252018	468.99222195615	2.25514	8.41876e-06	5.07475
parp4	ENSDARG00000069934	558045	both	986.174	1293.3	500.223	1.50912	0.0126733	1.89711	981.328827248403	1283.58801259267	498.845936290115	1.55361	0.0078701	2.10402
parvab	ENSDARG00000035629	567123	both	1080.42	1397.84	1379.46	5.00531	1.14435e-20	19.9414	1074.60364647201	1394.82585844659	1388.67922805086	5.04123	2.74108e-21	20.5621
parvg	ENSDARG00000067711	100037387	both	417.788	133.589	729.171	2.13191	0.0138534	1.85844	415.850235705264	132.518129408587	734.786581832736	2.13988	0.0127886	1.89318
pawr	ENSDARG00000045486	449994	Ens95	495.516	525.644	397.292	1.73836	0.00208793	2.68028	82.5870795209052	37.724139028722	35.631852592151	1.49673	0.212536	0.672568
pcdh12	ENSDARG00000076594	555419	both	1806.2	1969.95	705.122	5.29251	9.6977e-18	17.0133	6198.88902756912	6641.38304028731	3324.35554454339	5.43452	1.15413e-27	26.9377
pcyt2	ENSDARG00000043003	450016	Ens95	1745.96	1934.14	1122.61	1.20659	0.00755821	2.12158	109.792235127792	55.1352801189014	40.4469678073066	1.47848	0.293712	0.532078
pdcd6ip	ENSDARG00000025269	406669	both	2213.3	2659.2	1403.51	1.29902	0.00728008	2.13786	2239.5672740669	2666.80644364581	1427.2001497721	1.29645	0.00573544	2.24143
pde4ba	ENSDARG00000032868	565706	both	10987.8	12298.9	11438.7	2.63545	1.31375e-14	13.8815	10789.7590362312	12181.9950494288	11493.6800185763	2.61519	3.40378e-15	14.468
pde4bb	ENSDARG00000074233	555599	RefSeq	67.0404	52.274	61.5659	1.5225	0.0691745	1.16005	123.394812931235	139.289128721435	136.749272110418	1.76884	0.00629041	2.20132
pde4d	ENSDARG00000032761	566998	both	198.206	189.735	64.4518	1.83346	0.0250802	1.60067	201.12382895091	242.78868964639	89.5611430018932	1.50493	0.0482084	1.31688
pdgfba	ENSDARG00000086778	798657	both	3460.84	4299.05	1428.52	4.60024	4.8616e-16	15.3132	4074.94366483149	4964.10978193337	1522.53943103218	4.61132	3.64516e-15	14.4383
pdgfbb	ENSDARG00000038139	796490	both	3387.97	2656.29	1518.95	4.13901	6.86257e-17	16.1635	3293.76705383375	2527.51731492437	1434.90433411635	4.30061	2.27699e-18	17.6426
pdgfd	ENSDARG00000077677	100535718	both	2651.5	1825.72	853.264	3.68243	4.86759e-10	9.31269	598.513423351501	494.28294983787	399.65456285791	3.34127	4.18893e-12	11.3779
pdlim1	ENSDARG00000019845	550568	both	4788.04	5576.86	3725.7	1.96848	9.42773e-05	4.02559	4713.29320889307	5453.55630369063	3715.34290001402	1.97879	6.03152e-05	4.21957
pdlim2	ENSDARG00000069956	560322	both	454.709	617.607	484.831	1.70879	5.68357e-05	4.24538	452.77151831461	616.160937469126	489.215705859804	1.72746	2.96305e-05	4.52826
pdlim5b	ENSDARG00000027600	393165	RefSeq	205.008	334.941	499.261	1.41261	0.0516619	1.28683	1032.82430036144	889.90276683139	799.309125715821	1.6041	0.000183877	3.73547
pdlim7	ENSDARG00000103854	393813	RefSeq	100.075	24.2009	68.2996	1.22336	0.384494	0.415111	384.758629297393	439.147669718969	207.049954251689	1.46664	0.0118839	1.92504
pdzd8	ENSDARG00000088699	561279	both	897.758	674.721	527.158	1.14029	0.0310004	1.50863	892.912071526022	672.263503204148	530.625696710141	1.14492	0.0251252	1.59989
pea15	ENSDARG00000079771	557745	RefSeq	23.3184	34.8493	23.0872	2.48421	0.0565835	1.24731	102.019333525824	78.3501349058072	33.7058065060888	2.36138	0.0141899	1.84802
peak1	ENSDARG00000079756	565111	both	365.322	581.79	215.481	1.62759	0.0265056	1.57666	627.661804358879	975.991186666166	328.390857673608	1.56265	0.0101364	1.99412
peak3	ENSDARG00000094273	566981	RefSeq	5.8296	5.80822	22.1252	0.47924	0.870755	0.0601042	128.252876432464	51.2661376544171	279.276682479022	2.04294	0.0212778	1.67207
pecam1	ENSDARG00000060263	569386	both	20380.3	20907.7	9747.61	8.39138	2.01775e-48	47.6951	20337.7970415481	20626.3984781658	9548.37347165345	9.16458	1.14101e-38	37.9427
perp	ENSDARG00000063572	494479	both	9926.83	8388.04	2916.68	1.97443	0.0017749	2.75083	9873.52825989927	8368.95515067955	2938.18330428791	1.97232	0.00148494	2.82829
pfkfb3	ENSDARG00000001953	554477	both	5609.05	2962.19	2024.94	3.31219	2.05841e-06	5.68647	5518.76013739696	2874.77285111184	2015.60722906411	3.33888	1.34558e-06	5.87109
pfkpa	ENSDARG00000028000	560944	both	1524.44	1897.35	1153.4	1.56159	0.0025913	2.58648	1478.79452977433	1861.05752541695	1149.84951337914	1.56701	0.00172525	2.76315
pgfb	ENSDARG00000076767	557468	both	239.014	145.205	74.0714	3.30186	7.63704e-05	4.11707	351.723797489031	273.741829362265	193.567631649253	2.2486	4.62181e-05	4.33519
phactr2	ENSDARG00000027172	570136	both	779.223	684.402	490.603	2.48276	2.68443e-05	4.57115	1400.0939010544	1400.62957214332	753.084019650328	2.63726	1.21472e-07	6.91552
phactr4b	ENSDARG00000032221	393643	both	1897.53	2202.28	1303.46	1.88911	4.51091e-05	4.34574	2995.48195485824	3456.11150640061	2057.01721991445	1.72392	4.9807e-05	4.30271
phf11	ENSDARG00000021677	569187	both	196.263	90.9954	95.2347	1.8314	0.0133924	1.87314	205.98189245214	90.9248479153812	96.3023043031109	1.75893	0.0176101	1.75424
phlda2	ENSDARG00000042874	553622	both	12069.2	12930.1	4710.75	2.22678	0.00278048	2.55588	11752.6272221749	12672.4088568022	4692.8112886906	2.25382	0.00233419	2.63186
phldb2b	ENSDARG00000074843	560668	both	2318.24	2184.86	1186.1	1.28407	0.0119025	1.92436	2289.11952177944	2119.32278492128	1210.5199650901	1.30514	0.00763426	2.11723
picalma	ENSDARG00000012866	393901	both	1156.2	1632.11	756.106	1.27179	0.0126687	1.89727	1115.41137988234	1581.51198235796	753.084019650328	1.30317	0.00791278	2.10167
piezo1	ENSDARG00000076870	567949	both	250.673	454.009	278.008	1.47433	0.0113649	1.94444	1885.90025117738	2329.22376361955	1461.86897932122	1.61053	0.000901679	3.04495
piezo2a.2	ENSDARG00000076005	100334952	both	591.704	579.854	279.932	1.16596	0.0417951	1.37888	389.616692798623	395.61981699352	135.786249067386	2.02258	0.00242535	2.61523
pik3ap1	ENSDARG00000078285	100002256	RefSeq	254.559	129.717	193.355	1.08561	0.0891796	1.04973	243.874787761732	101.564989692713	190.67856252016	1.3918	0.0357763	1.44641
pik3c2a	ENSDARG00000060841	571356	both	1222.27	1152.93	1076.44	1.10919	0.0119139	1.92394	1120.26944338357	1103.67288799415	1064.14046254938	1.17492	0.00585187	2.2327
pik3c2b	ENSDARG00000086927	567938	both	1410.76	1422.05	1220.74	1.67006	1.15854e-05	4.93609	1372.88874544752	1403.53142899168	1216.29810334829	1.69618	4.99029e-06	5.30187
pik3ca	ENSDARG00000075456	561737	both	547.011	780.237	610.849	1.26057	0.00354251	2.45069	3148.02514879686	3706.63848097597	2574.16059402216	1.38839	9.61253e-05	4.01716
pik3cb	ENSDARG00000075253	100002263	both	1291.26	1216.82	758.992	1.77093	0.000388976	3.41008	1270.86941192169	1203.30330645462	761.751227037608	1.77016	0.000312203	3.50556
pik3cg	ENSDARG00000017757	406598	both	1491.41	1395.91	613.735	3.08905	4.85466e-09	8.31384	1483.65259327556	1392.89128721435	618.260793625972	3.08324	3.55924e-09	8.44864
pim1	ENSDARG00000100020	572469	both	20093.7	20169	13759	2.25205	4.56319e-05	4.34073	19976.3571170566	20113.7371016217	13855.9755431316	2.25359	3.36266e-05	4.47332
pimr186	ENSDARG00000095734	566030	Ens95	136.996	32.9132	33.6688	2.35696	0.0412391	1.38469	36.9212826093458	10.6401417773318	30.8167373769955	-1.04691	0.395606	0.402737
pip5k1ba	ENSDARG00000044295	449831	both	400.299	280.731	303.019	1.62049	0.0214877	1.66781	398.361207100837	279.545543058991	304.315281597831	1.60895	0.0193304	1.71376
pip5k1bb	ENSDARG00000006508	447840	RefSeq	424.589	305.9	339.574	1.08532	0.0506946	1.29504	422.651524606985	307.596825926502	344.762249405137	1.07831	0.0406879	1.39054
pitpnaa	ENSDARG00000039490	393909	both	523.692	862.52	639.708	1.40197	0.00635355	2.19698	520.784407331825	860.884198347758	644.262415787812	1.40216	0.00507031	2.29497
pkn1a	ENSDARG00000060184	560840	Ens95	2009.27	2007.71	1030.27	2.51874	3.69965e-08	7.43184	134.08255263394	76.415563673565	64.5225438830843	1.08298	0.191844	0.717052
pkp2	ENSDARG00000023026	568060	both	717.041	653.425	531.006	1.6993	0.00948896	2.02278	533.415372435023	531.039803250471	494.030821074959	1.57974	0.0140008	1.85385
pkp3b	ENSDARG00000079438	100330353	both	1094.02	1509.17	1172.64	2.09229	8.58073e-06	5.06648	1026.02301145972	1468.33956527179	1161.40578989552	2.19003	3.52879e-06	5.45237
pla2g12b	ENSDARG00000015662	406739	Ens95	339.088	196.511	119.284	2.3697	0.00210554	2.67664	0	12.574713009574	16.3713917315289	-1.99116	0.269603	0.569275
plac8l1	ENSDARG00000069031	797097	RefSeq	41.7788	30.9772	17.3154	1.89582	0.257072	0.589944	87.4451430221349	116.074273934529	27.9276682479022	2.47348	0.0136507	1.86484
plcg1	ENSDARG00000038442	373867	both	5524.52	5360.99	3929.63	2.14469	5.89352e-08	7.22963	219.584470255583	280.512828675112	136.749272110418	1.4908	0.0108827	1.96326
plecb	ENSDARG00000021987	100321011	both	8058.45	7703.63	5217.71	1.76454	0.000108792	3.9634	9170.08066492121	8736.52368480556	5667.39060823808	1.72329	0.000144466	3.84023
plek	ENSDARG00000104325	393814	both	332.287	141.333	358.814	2.48143	9.63634e-05	4.01609	330.348318083621	141.223699953677	362.096664179697	2.48369	9.42501e-05	4.02572
plekhg2	ENSDARG00000058459	565988	both	1432.14	1503.36	718.589	1.54092	0.00375315	2.4256	1404.95196455563	1495.42356252318	716.489144015145	1.53867	0.00306036	2.51423
plekhg5a	ENSDARG00000025902	562861	both	4264.35	5349.37	2572.3	4.34208	2.63316e-19	18.5795	4207.08299206493	5325.87460236265	2591.49500879672	4.41875	1.60262e-20	19.7952
plekhg5b	ENSDARG00000101752	796404	both	725.785	600.183	203.937	2.34769	0.00329029	2.48277	1925.73637188746	1778.83824804666	725.156351402425	2.50335	6.98045e-05	4.15612
PLEKHH3	ENSDARG00000070174	571341	both	1811.06	2385.24	1446.8	1.257	0.0110549	1.95644	1801.36994625598	2374.68618757724	1457.05386410607	1.25948	0.00838883	2.0763
plekhn1	ENSDARG00000087844	569267	RefSeq	182.661	182.959	393.444	1.31932	0.0718027	1.14386	688.873404474374	503.955805999081	571.072664517448	1.84232	8.31416e-05	4.08018
plk2a	ENSDARG00000090752	100148413	both	1100.82	1565.31	1722.88	3.8929	2.46224e-21	20.6087	8384.04599042224	12518.610443839	5720.35687560479	4.52453	3.47713e-20	19.4588
plk2b	ENSDARG00000019130	565576	both	15838	21960.9	8032.42	4.78192	5.29955e-21	20.2758	15752.7567090875	21909.9864907585	8090.35658450435	4.78203	1.85498e-21	20.7317
plk3	ENSDARG00000038754	334202	both	1884.9	2382.34	1640.15	1.77363	3.58401e-05	4.44563	1874.24089877442	2366.94790264827	1650.62149575532	1.77731	2.216e-05	4.65443
plp2	ENSDARG00000036630	798079	Ens95	347.833	337.845	176.04	1.21997	0.0426604	1.36997	369.212826093458	340.484536874619	183.937401218942	1.12206	0.052908	1.27648
plpp1a	ENSDARG00000053381	569053	both	5427.36	5778.21	3406.32	2.58035	4.15472e-08	7.38146	5400.22338796695	5750.5129878398	3406.21250320103	2.61559	3.13238e-08	7.50413
plpp2a	ENSDARG00000002231	563806	both	239.985	110.356	65.4137	2.9125	0.000292312	3.53415	366.297987992721	264.068973201054	198.382746864409	3.23234	2.36614e-08	7.62596
pls3	ENSDARG00000037655	436598	Ens95	2929.37	3248.73	2470.33	1.41174	0.000110691	3.95589	525.642470833055	802.847061380494	1703.58776312203	0.880796	0.235168	0.628622
plvapa	ENSDARG00000076972	100136858	both	3383.11	2665	2156.73	6.57172	2.94593e-39	38.5308	3343.31930154629	2614.57302037527	2160.06068551878	6.55638	5.48716e-40	39.2607
plvapb	ENSDARG00000045003	570276	both	20037.3	21057.7	9721.63	7.12951	1.40169e-36	35.8533	19929.7197074448	21008.4762965337	9792.01830154032	7.1464	4.38335e-37	36.3582
plxnb3	ENSDARG00000032990	566546	both	879.298	1043.54	546.397	1.30574	0.0117088	1.93149	1424.38421856055	1475.11056458464	643.299392744781	1.67157	0.00132546	2.87763
pmp22b	ENSDARG00000060457	678607	both	9315.7	12009.5	7310.95	2.32599	1.25233e-07	6.90228	9264.32709684507	11980.7996412757	7365.20023310192	2.326	7.10634e-08	7.14835
pnoca	ENSDARG00000025024	100529086	Ens95	182.661	28.0731	364.585	2.15893	0.0427082	1.36949	205.98189245214	35.7895677964798	495.956867161021	0.834704	0.517904	0.285751
pnp5a	ENSDARG00000078619	791647	both	6238.64	4667.87	6045	1.74343	0.0145134	1.83823	6204.71870377059	4656.51295600686	6088.23167804267	1.74579	0.0123693	1.90765
pnp5b	ENSDARG00000099802	447889	RefSeq	111.734	111.324	54.8321	1.26859	0.189854	0.721581	2207.50405495878	1861.05752541695	715.526120972114	1.88004	0.0072968	2.13687
podxl	ENSDARG00000031228	563365	both	20791.3	31029.4	12007.3	4.98241	2.82521e-18	17.5489	20680.7763247349	30954.1070014906	12092.6803513416	4.98157	1.58864e-18	17.799
polr2b	ENSDARG00000098783	100149268	Ens95	13333.3	16551.5	9263.74	2.85084	2.59192e-10	9.58638	973.555925646435	1384.18571666926	1484.01850931094	0.349038	0.549494	0.260037
pon3.2	ENSDARG00000040290	554122	both	1175.64	1364.93	678.186	1.1902	0.0274501	1.56146	855.01917621643	920.855906547265	477.65942934343	1.47946	0.00464812	2.33272
ponzr1	ENSDARG00000090444	567858	both	8693.87	8402.56	5083.03	4.53238	7.79074e-12	11.1084	8429.7117873338	8109.72260555911	4979.79215551387	4.5561	6.48189e-12	11.1883
pparda	ENSDARG00000044525	30750	RefSeq	19.432	32.9132	3.84787	0.647371	0.803309	0.0951176	1577.89902519941	1688.8806857474	676.042176207839	2.31055	5.10306e-05	4.29217
ppfibp1a	ENSDARG00000045749	565020	both	1459.34	2059.01	1239.01	1.81861	9.21073e-05	4.03571	1431.18550746227	2042.90722124771	1245.18879463922	1.89276	2.93919e-05	4.53177
ppiaa	ENSDARG00000009212	336612	both	72357	56563.3	43480.9	1.2377	0.0159825	1.79636	71261.9618868385	55788.1979097831	43016.3132861136	1.24451	0.0122466	1.91198
ppm1f	ENSDARG00000005786	553757	both	83.5576	77.4429	56.756	2.1962	0.0259334	1.58614	79.6722414201673	81.2519917541704	56.8183595388355	2.11063	0.0272912	1.56398
ppp1r13ba	ENSDARG00000004377	563577	both	3160.61	2803.43	1936.44	3.29936	6.07176e-14	13.2167	3144.13869799587	2856.39442440554	2028.12652862352	3.19432	1.66264e-13	12.7792
ppp1r15a	ENSDARG00000069135	797943	RefSeq	2990.58	4035.74	5936.3	1.10356	0.300672	0.521908	14990.0407393944	12553.4327260193	9761.20156416332	1.81484	0.0238421	1.62266
ppp1r9ba	ENSDARG00000079366	558232	both	1455.46	1488.84	1564.16	1.09406	0.00389759	2.4092	1439.93002176449	1481.88156389749	1574.54267535586	1.11216	0.00235128	2.6287
PPP2CA	ENSDARG00000030224	550585	Ens95	992.975	903.178	953.309	1.20027	0.00651968	2.18577	48.5806350122972	37.724139028722	14.4453456454666	-0.194548	0.906685	0.0425437
ppp2r5a	ENSDARG00000027017	562460	both	561.585	415.288	201.051	1.59374	0.0196674	1.70625	558.677302641417	433.343956022242	209.939023380782	1.56028	0.0190027	1.72118
ppp2r5d	ENSDARG00000014428	406610	both	2581.54	2633.06	2020.13	1.03426	0.0138534	1.85844	2568.94397945027	2627.14773338484	2033.9046668817	1.03499	0.00986168	2.00605
ppt1	ENSDARG00000039980	406648	RefSeq	5007.63	5695.93	4368.29	0.990935	0.0605662	1.21777	1339.85391363916	1969.39351442251	1531.20663841946	1.17143	0.00445104	2.35154
prcp	ENSDARG00000037883	436967	both	2077.28	2170.34	933.108	3.89752	5.47763e-15	14.2614	2068.56343882361	2171.55620819182	942.799559127456	3.8313	5.56163e-15	14.2548
prdm1a	ENSDARG00000002445	323473	both	5268.99	6515.85	3072.52	2.9185	6.96848e-07	6.15686	5240.87890512662	6501.12662594976	3094.19303725895	2.91835	5.29175e-07	6.2764
prdm1b	ENSDARG00000098925	110437762	both	180.718	185.863	67.3377	2.23558	0.015769	1.8022	179.748349545499	198.293551304821	70.300682141271	2.19479	0.0157702	1.80216
prdx1	ENSDARG00000058734	541344	both	2787.52	2352.33	2207.71	1.29843	0.0182851	1.7379	2732.17491309159	2324.38733553895	2152.35650117453	1.30707	0.0157586	1.80248
prex1	ENSDARG00000075793	570984	both	1980.12	1747.31	1287.11	1.16399	0.032714	1.48527	1898.53121628057	1713.06282615043	1238.44763333801	1.16012	0.0306124	1.5141
prex2	ENSDARG00000071692	557288	both	1635.2	1323.31	953.309	2.00012	1.89421e-06	5.72257	1632.30933641318	1332.91957901484	965.912112160203	1.99169	1.17778e-06	5.92894
prickle3	ENSDARG00000073996	570116	both	87.444	111.324	49.0603	1.84924	0.0222722	1.65224	295.370260874767	247.625117726996	173.3441477456	1.80834	0.00312076	2.50574
prkacba	ENSDARG00000001782	393998	both	154.484	42.5936	152.953	2.41041	0.00710963	2.14815	153.514806638859	42.5605671093274	154.083686884978	2.54459	0.00586578	2.23167
prkar1aa	ENSDARG00000076128	494533	both	5209.72	4216.77	4150.89	1.54648	6.99532e-05	4.15519	5207.84407331826	4207.69243012668	4180.48302979805	1.54751	4.18424e-05	4.37838
prkceb	ENSDARG00000069928	100332055	both	612.108	757.005	314.563	1.33885	0.0421541	1.37516	605.314712253223	755.450066190561	296.611097253582	1.35224	0.0395382	1.40298
prkd2	ENSDARG00000104676	101882608	both	2609.72	3164.51	2317.38	1.83399	4.99602e-07	6.30138	2907.06519913586	3470.62079064242	2457.63480581539	1.89065	1.41639e-07	6.84882
pros1	ENSDARG00000068261	768180	both	683.035	763.781	594.495	1.2765	0.0213192	1.67123	679.157277471914	762.221065503408	599.00033276535	1.28092	0.0186751	1.72874
psmg2	ENSDARG00000035987	573107	both	1337.89	1171.32	802.28	1.35198	0.0218884	1.65979	1330.1377866367	1168.48102427426	806.050287017039	1.35128	0.0184928	1.733
ptbp1a	ENSDARG00000019362	323490	both	5017.34	3778.25	2589.61	1.51705	0.00241596	2.61691	4995.06089196439	3766.61018917547	2596.31012401187	1.5194	0.00186116	2.73022
ptbp3	ENSDARG00000043757	798982	both	4113.75	3667.89	2192.32	1.48309	0.00227676	2.64268	5506.12917229376	5090.82419764523	2985.37143339644	1.39839	0.00278586	2.55504
ptpn11a	ENSDARG00000020334	333979	RefSeq	1626.46	1897.35	1624.76	0.838083	0.0558695	1.25283	1136.78685928775	1277.78429889594	759.825180951545	1.14303	0.0353828	1.45121
ptpn11b	ENSDARG00000012340	393426	Ens95	506.203	462.721	312.639	1.01848	0.0476705	1.32175	515.926343830596	461.395238889754	314.908535071173	0.99989	0.0446973	1.34972
ptpn12	ENSDARG00000102141	393642	RefSeq	55.3812	66.7945	34.6308	1.75309	0.104894	0.979248	190.436089248205	84.1538486025337	46.2251060654933	1.8962	0.0434408	1.3621
ptpra	ENSDARG00000001769	140818	Ens95	270.105	360.11	245.301	1.24162	0.0303249	1.5182	3075.15419627841	3307.14952151796	3310.87322194095	0.904964	0.00913873	2.03911
ptprb	ENSDARG00000076624	100149130	both	4349.85	6592.33	7128.17	6.04315	1.73633e-43	42.7604	4327.56296689543	5975.89053639601	6575.52133781642	5.91962	2.02057e-46	45.6945
ptprea	ENSDARG00000015891	100499203	both	2064.65	1493.68	1087.98	1.82096	0.000271677	3.56595	2087.99569282853	1495.42356252318	1097.84626905546	1.83502	0.000201891	3.69488
pvalb3	ENSDARG00000022817	100000771	both	142.825	96.8036	19.2393	2.54063	0.0419311	1.37746	141.855454235908	96.7285616121077	19.2604608606222	2.53518	0.0406426	1.39102
pxdc1b	ENSDARG00000040309	566349	Ens95	516.891	510.155	216.442	2.20659	0.000231747	3.63499	174.89028604427	161.53669789222	102.080442561298	1.44668	0.0539954	1.26764
pxk	ENSDARG00000063195	557065	both	1408.82	1431.73	1455.46	1.08132	0.0133841	1.87341	1414.66809155809	1438.35371117204	1466.68409453638	1.07498	0.0111808	1.95153
pxmp2	ENSDARG00000003144	447868	both	73.8416	198.447	123.132	2.24911	0.00768875	2.11414	72.8709525184457	198.293551304821	124.229972551013	2.26586	0.00770628	2.11316
pxnb	ENSDARG00000060766	565130	RefSeq	51.4948	32.9132	23.0872	1.09187	0.537332	0.269758	382.815403896902	285.349256755718	174.307170788631	1.64966	0.0131616	1.88069
qkia	ENSDARG00000097478	30471	both	24814.7	22405.2	12664.3	1.79582	4.90529e-05	4.30933	23730.6685908069	21537.5815285519	12399.8847020686	1.78332	2.92165e-05	4.53437
rab11a	ENSDARG00000041450	492487	both	7278.25	8010.5	4494.31	1.24902	0.0201816	1.69505	435.282489710183	679.034502516996	405.432701116097	1.28035	0.00666235	2.17637
rab11bb	ENSDARG00000090086	436828	both	1893.65	1707.62	1011.99	2.32643	6.35793e-05	4.19668	1864.52477177196	1704.35725560534	1018.87837952691	2.32435	5.3976e-05	4.2678
rab12	ENSDARG00000089428	553657	both	502.317	443.361	143.333	1.47975	0.0411872	1.38524	266.221879867388	198.293551304821	87.635096915831	1.63165	0.0260324	1.58449
rab13	ENSDARG00000034771	373105	both	750.075	1084.2	556.979	1.2676	0.018412	1.7349	746.198553788884	1079.49074759112	558.553364958044	1.28625	0.0136452	1.86502
rab1ba	ENSDARG00000058044	394117	both	777.28	885.753	663.757	1.10055	0.0159209	1.79803	773.403709395771	883.131767518543	668.33799186359	1.10196	0.0121908	1.91397
rab35b	ENSDARG00000058425	445154	both	698.58	703.762	446.352	1.61535	0.000232865	3.6329	559.648915341663	641.310363488274	393.876424599724	1.64386	0.000164897	3.78279
rab3il1	ENSDARG00000007711	100331248	both	646.114	1090.01	685.882	1.52921	0.00636873	2.19595	642.235994862568	1070.78517704603	677.00519925087	1.61747	0.00311632	2.50636
rab5aa	ENSDARG00000018602	337737	both	4078.78	4399.73	2941.69	1.27349	0.00286873	2.54231	3682.41213393212	3987.15130965108	2816.84240086599	1.25468	0.00203026	2.69245
rab5c	ENSDARG00000026712	386807	both	5287.45	5349.37	3306.28	1.80574	5.36721e-05	4.27025	3886.45080098377	4207.69243012668	2938.18330428791	1.70804	2.38114e-05	4.62322
rab8b	ENSDARG00000068628	100093706	both	2529.07	2511.09	2244.27	2.59069	6.0919e-13	12.2152	115.621911329267	191.522551991973	160.824848186195	2.87097	9.15134e-06	5.03852
rabep2	ENSDARG00000061213	791143	Ens95	793.797	619.543	355.928	2.29625	1.30427e-05	4.88463	136.025778034432	75.448278057444	96.3023043031109	1.47748	0.0878362	1.05633
rabgap1l	ENSDARG00000061757	555272	both	1367.04	1184.88	1471.81	1.48461	0.000165179	3.78205	1374.83197084801	1185.89216536444	1489.79664756913	1.4864	0.000135055	3.86949
rac1b	ENSDARG00000087954	562838	RefSeq	190.434	224.584	156.801	1.03093	0.075439	1.1224	163.230933641318	174.111410901794	142.527410368604	1.57873	0.00873709	2.05863
rack1	ENSDARG00000041619	30722	both	90055.6	85063.3	80254.9	1.06826	0.0494517	1.30582	89296.0652161034	84719.7106879645	80286.2680744606	1.07373	0.0396372	1.4019
rad51b	ENSDARG00000037046	406721	both	331.316	292.347	235.682	2.40099	1.15077e-06	5.93901	274.966394169602	232.148547869058	225.34739206928	2.6089	6.12848e-08	7.21265
ralab	ENSDARG00000016253	492355	both	1283.48	1057.1	839.797	1.01229	0.0189529	1.72232	1267.95457382096	1055.30860718809	820.495632662505	1.02341	0.0141314	1.84981
ralba	ENSDARG00000040778	445255	both	843.349	908.986	373.243	2.69118	8.21491e-07	6.0854	1010.47720825578	1095.93460306518	467.066175870088	2.55898	3.49822e-07	6.45615
ralbb	ENSDARG00000113643	415213	both	99.1032	92.9315	18.2774	2.7629	0.0110214	1.95776	99.1044954250862	92.8594191476234	18.2974378175911	2.76265	0.0108689	1.96381
ralbp1	ENSDARG00000078653	404612	both	699.552	739.58	237.606	1.67076	0.00988411	2.00506	1009.50559555554	894.739194911996	349.577364620293	1.67104	0.00424105	2.37253
ralgapa1	ENSDARG00000076889	556427	both	5448.73	5484.89	3608.34	2.31977	1.45556e-09	8.83697	5482.81046748786	5533.84100982868	3659.48756351822	2.28314	7.25036e-10	9.13964
ralgapa2	ENSDARG00000005861	568210	both	1120.25	1514.98	955.233	1.41906	0.00154511	2.81104	1163.99201489464	1533.14770155191	987.098619106887	1.44998	0.000771447	3.11269
ralgapb	ENSDARG00000088899	559303	both	233.184	352.365	170.268	1.29943	0.0318899	1.49635	255.534140164683	401.423530690247	205.123908165626	1.27024	0.0261042	1.58329
RALGDS	ENSDARG00000042409	799483	both	269.133	333.973	161.61	1.61261	0.026917	1.56997	7889.49512599706	7160.81541614433	4223.81906673445	2.48694	1.53839e-06	5.81293
ralgps2	ENSDARG00000026519	393446	Ens95	1742.08	1832.49	735.904	1.37444	0.0130458	1.88453	14.5741905036891	101.564989692713	62.5964977970221	0.3574	0.822311	0.0849639
ramp2	ENSDARG00000037895	566313	both	5057.18	5425.84	4467.37	3.67806	1.5571e-28	27.8077	5030.03894917325	5413.89759342967	4505.98481834256	3.67689	3.16912e-30	29.4991
rap1b	ENSDARG00000008867	321107	both	7965.17	8299.94	5379.32	1.93681	1.31547e-05	4.88092	6755.62310481004	6866.76058884352	4854.59915991982	1.90652	4.97247e-06	5.30343
rapgef1b	ENSDARG00000015971	394101	both	617.937	475.306	486.755	1.81723	1.85509e-05	4.73163	1407.86680265637	1153.00445441632	968.801181289296	1.96787	3.61521e-07	6.44187
rapgef2	ENSDARG00000005482	557693	both	4445.07	4286.47	3057.13	1.17114	0.00698149	2.15605	4276.0674937824	4289.91170749697	3075.89559944136	1.16125	0.00510924	2.29164
rapgef3	ENSDARG00000079291	101886094	both	167.115	201.352	74.0714	3.10738	1.71266e-05	4.76633	898.741747727497	779.632206593588	321.649696372391	4.12856	5.96912e-12	11.2241
rapgef5a	ENSDARG00000075271	100331732	both	114.649	110.356	50.9842	3.02438	0.000252879	3.59709	3169.40062820227	1978.0990849676	1192.22252727251	2.92061	2.80797e-07	6.55161
rapgef5b	ENSDARG00000074307	100073343	Ens95	434.305	662.137	523.31	1.96008	0.000104617	3.9804	10.6877397027054	8.70557054508969	0	-0.534801	1	0
RASA2	ENSDARG00000078775	100331895	Ens95	196.263	103.58	125.056	1.50046	0.0350748	1.455	307.029613277718	213.770121162758	200.308792950471	1.09731	0.0701985	1.15367
rasal2	ENSDARG00000036257	793730	both	1518.61	1320.4	796.508	1.48413	0.00126262	2.89873	1579.8422505999	1320.34486600527	817.606563533412	1.47711	0.00103311	2.98585
rasal3	ENSDARG00000089933	798492	both	422.646	214.904	566.598	2.01988	0.00388228	2.41091	420.708299206493	209.900978698274	574.924756689572	1.99814	0.00376616	2.4241
rasgef1bb	ENSDARG00000044251	445085	both	3967.04	3187.74	1687.29	1.76759	0.00184465	2.73409	3945.71917569878	3180.4351058061	1699.73567094991	1.76797	0.00148365	2.82867
rasgrp3	ENSDARG00000077864	563441	both	3323.84	4051.23	1649.77	4.37816	2.30339e-18	17.6376	3398.70122546031	4101.29101235336	1674.6970718311	4.39236	1.13154e-18	17.9463
rasip1	ENSDARG00000074829	102725533	both	6851.72	6864.35	4754.04	7.28944	1.73633e-43	42.7604	6815.86309222529	6871.59701692413	4801.63289255311	7.19896	4.19091e-48	47.3777
rassf1	ENSDARG00000004840	447811	both	3901.94	4009.61	3655.47	2.508	6.14835e-11	10.2112	3930.17337249484	4018.10444936695	3682.60011655096	2.50592	1.78946e-11	10.7473
rassf3	ENSDARG00000059064	792539	RefSeq	53.438	31.9452	85.615	1.44057	0.218574	0.660401	513.983118430104	322.106110168318	693.376590982399	1.62982	0.00246763	2.60772
rassf4	ENSDARG00000012460	494494	Ens95	383.782	341.717	162.572	1.53276	0.0497696	1.30304	380.87217849641	347.255536187466	130.971133852231	1.44881	0.077422	1.11114
RASSF5	ENSDARG00000070601	100150414	both	777.28	1027.09	662.795	1.49805	0.00876328	2.05733	444.027004012396	522.334232705381	338.984111146951	1.47557	0.00346556	2.46023
rbck1	ENSDARG00000031954	431715	both	312.855	272.986	152.953	1.65776	0.0116822	1.93248	310.916064078702	272.774543746144	159.861825143164	1.59722	0.0125989	1.89967
rbms2a	ENSDARG00000044179	378458	Ens95	3121.75	3434.59	1613.22	1.31694	0.0171474	1.7658	30.1199937076242	139.289128721435	117.488811249795	0.408892	0.753685	0.12281
rbms3	ENSDARG00000044574	767747	RefSeq	164.2	171.342	307.829	0.777403	0.439712	0.356832	6062.86324953469	6834.84016351153	3679.71104742187	1.3152	0.00236624	2.62594
rbpms2a	ENSDARG00000045930	436682	both	1821.75	2268.11	958.119	3.44039	2.77242e-12	11.5571	1779.02285415032	2272.15391226841	963.986066074141	3.4523	1.19003e-12	11.9244
rbpms2b	ENSDARG00000079578	393229	both	3928.18	4699.82	2538.63	3.49619	3.68122e-14	13.434	3537.64184159548	4420.49526567332	2452.81969060024	3.47802	2.82937e-14	13.5483
rca2.2	ENSDARG00000095512	565541	both	258.446	106.484	74.0714	2.82344	0.000646009	3.18976	704.419207678309	419.801957396547	358.244572007573	4.33175	5.91075e-16	15.2284
rcan1a	ENSDARG00000003109	445222	both	1575.93	827.671	1317.89	1.89628	1.89301e-05	4.72285	1568.18289819695	825.094630551278	1327.04575329687	1.9099	1.13327e-05	4.94567
rcbtb1	ENSDARG00000036645	336007	both	322.571	391.087	392.482	1.35684	0.00578648	2.23759	320.632191081161	389.816103296794	394.839447642755	1.35561	0.00492513	2.30758
rdh5	ENSDARG00000008306	556528	RefSeq	163.229	1044.51	2456.86	1.94633	0.059487	1.22558	150.599968538121	1000.17332706919	2422.96597626627	2.0119	0.0482084	1.31688
reep1	ENSDARG00000014854	799901	both	136.996	311.708	252.997	1.93944	0.00162834	2.78826	136.025778034432	315.335110855471	254.238083360213	1.94009	0.00218116	2.66131
reep3a	ENSDARG00000017569	641577	Ens95	758.819	902.21	743.6	1.39464	0.000477701	3.32084	26.2335429066405	66.7427075123543	20.2234839036533	1.13678	0.574411	0.240778
rel	ENSDARG00000055276	415101	both	1178.55	1204.24	1512.21	1.8672	0.00231246	2.63593	1171.76491649661	1201.36873522238	1519.65036190309	1.86825	0.00198017	2.7033
rell1	ENSDARG00000018312	799556	both	556.727	625.352	283.78	1.51152	0.00594867	2.22558	553.819239140188	604.553510075673	299.500166382675	1.48464	0.00426969	2.3696
reps2	ENSDARG00000076768	101882936	both	121.45	68.7306	80.8052	2.60386	0.00107858	2.96715	161.287708240827	130.583558176345	115.562765163733	1.72603	0.0184456	1.73411
rflna	ENSDARG00000023484	368489	both	134.081	94.8676	33.6688	3.08318	0.000878058	3.05648	133.110939933694	94.7939903798655	34.6688295491199	3.08298	0.000843761	3.07378
rgcc	ENSDARG00000035810	431737	both	10428.2	11925.2	5461.08	4.41911	4.90814e-19	18.3091	10136.8353016659	11459.4326941864	5327.4434740481	4.47358	1.51669e-19	18.8191
rgl1	ENSDARG00000005989	402933	both	4278.93	4215.8	1974.92	2.00466	6.4689e-05	4.18917	4476.21971003306	4450.48111977307	2026.20048253745	2.02831	4.66879e-05	4.3308
rgl2	ENSDARG00000007727	65227	both	205.008	84.2192	50.9842	2.13373	0.018578	1.731	211.811568653616	94.7939903798655	52.966267366711	2.09249	0.0165673	1.78075
rgrb	ENSDARG00000098724	554142	both	445.964	2364.91	4278.83	2.57355	0.00184135	2.73486	441.112165911658	2376.62075880949	4432.7950670722	2.58168	0.0018904	2.72345
rgs13	ENSDARG00000017653	100037359	both	1629.37	1143.25	3489.05	2.55133	0.00315765	2.50064	1620.64998401023	1140.42974140675	3515.03410706355	2.55785	0.0028845	2.53993
rgs18	ENSDARG00000036106	768164	both	165.172	188.767	172.192	2.83873	3.37473e-06	5.47176	164.202546341564	188.62069514361	175.270193831662	2.80637	3.2959e-06	5.48203
rgs3a	ENSDARG00000099746	445235	both	1691.56	1853.79	3369.77	2.58797	2.3784e-08	7.62371	9927.93857111305	6256.40336507112	5744.43245168057	3.2706	7.48732e-17	16.1257
rgs3b	ENSDARG00000035132	557360	both	2998.36	2500.44	1053.35	3.06411	4.19137e-09	8.37764	2974.10647545283	2485.92403343117	1061.25139342028	3.06276	2.75639e-09	8.55966
rgs5b	ENSDARG00000017860	550519	both	20034.4	22381	8206.54	4.002	1.45118e-06	5.83828	19926.8048693441	22328.8211625389	8266.58980137904	4.00222	1.29902e-06	5.88638
rhag	ENSDARG00000019253	405771	both	7663.98	7042.47	3305.32	3.45607	1.92552e-13	12.7155	468.317321518545	864.753340812242	414.099908503377	2.9518	5.99987e-06	5.22186
rhbdd3	ENSDARG00000079816	797317	Ens95	711.211	514.995	92.3488	2.15838	0.0110703	1.95584	114.650298629021	52.2334232705381	28.8906912909333	0.916684	0.442772	0.35382
rhbdf1a	ENSDARG00000036541	798402	both	2397.91	2731.8	2064.38	2.1865	3.25387e-07	6.4876	2371.70660130035	2720.97443814859	2079.16674990417	2.18305	1.82999e-07	6.73755
rhoaa	ENSDARG00000026845	406411	both	4972.65	5692.05	4527.98	1.0933	0.00296137	2.52851	4765.76029470635	5608.32200227	4531.02341746137	1.09027	0.00195545	2.70875
rhoab	ENSDARG00000094673	100006041	both	1827.58	1815.07	601.229	1.81448	0.00456594	2.34047	1733.35705723876	1771.09996311769	594.185217550194	1.84304	0.00289741	2.53799
rhoac	ENSDARG00000116058	406659	both	2171.53	3159.67	2772.39	1.07358	0.0166148	1.7795	2159.89503264673	3143.6782523935	2767.72822567141	1.09643	0.0107735	1.96764
rhoca	ENSDARG00000021309	394125	both	4127.36	4356.16	2292.37	2.89742	3.46077e-10	9.46083	4105.06365853911	4346.014273232	2307.40321110254	2.90203	1.80147e-10	9.74437
rhocb	ENSDARG00000018328	436718	both	4641.33	5283.54	2591.54	2.88793	3.34672e-09	8.47538	4616.13193886848	5270.73932224375	2595.34710096884	2.8958	2.23119e-09	8.65146
rhogb	ENSDARG00000004301	336933	both	631.54	568.237	522.348	2.00323	6.99532e-05	4.15519	601.428261452239	562.960228582467	525.810581494986	1.9893	5.23936e-05	4.28072
rilpl2	ENSDARG00000024818	100004718	both	382.81	189.735	209.709	1.29562	0.0326633	1.48594	380.87217849641	189.587980759731	211.865069466844	1.29152	0.0280551	1.55199
rin2	ENSDARG00000074589	100006622	both	1240.73	1119.05	695.502	1.24212	0.00851897	2.06961	1232.9765166121	1059.17774965258	677.00519925087	1.28665	0.00469187	2.32865
rin3	ENSDARG00000077618	799244	both	920.105	1118.08	918.678	1.80551	1.19839e-05	4.9214	915.259163631678	1107.54203045863	919.68700609471	1.84742	4.17011e-06	5.37985
ripor1	ENSDARG00000062178	566573	both	598.505	586.63	1073.55	1.63992	0.000957065	3.01906	2111.31439763443	2240.23348693641	2542.38083360213	2.12961	8.60448e-10	9.06528
rmi2	ENSDARG00000103137	563218	Ens95	725.785	946.74	212.595	1.88329	0.0097154	2.01254	83.5586922211511	337.582680026256	210.902046423813	0.903691	0.315635	0.500815
rmnd5b	ENSDARG00000043359	393747	RefSeq	1511.81	1522.72	1041.81	0.63635	0.295289	0.529753	860.848852417906	720.627784010202	459.361991525839	1.07763	0.0392161	1.40654
rnd1a	ENSDARG00000030547	405780	both	1318.46	1161.64	643.556	2.12596	0.00171082	2.7668	1279.61392622391	1152.0371688002	648.114507959937	2.14286	0.00175792	2.755
rnd3a	ENSDARG00000076799	80963	both	10141.6	10886.5	5456.27	2.10274	5.35282e-06	5.27142	4600.58613566454	6195.4643712555	2653.12848355071	2.26645	8.82948e-06	5.05406
rnf141	ENSDARG00000041802	414846	RefSeq	10.6876	22.2648	7.69573	0.529538	0.879848	0.0555923	986.186890749632	1182.99030851608	386.172240255475	2.32543	0.000316058	3.50023
rnf144ab	ENSDARG00000042557	437000	both	923.02	1465.61	994.673	2.23444	3.02388e-06	5.51944	918.174001732416	1462.53585157507	1001.54396475235	2.23579	2.16686e-06	5.66417
rnf144b	ENSDARG00000024940	394112	both	1118.31	883.817	662.795	1.71058	9.67444e-05	4.01437	1112.4965417816	883.131767518543	668.33799186359	1.69646	6.72744e-05	4.17215
rnf19b	ENSDARG00000060926	562396	RefSeq	91.3304	40.6575	105.816	0.470239	0.771608	0.112603	1081.40493537373	743.842638797108	581.66591799079	1.51755	0.0191445	1.71796
rnpepl1	ENSDARG00000007813	100535895	both	788.939	690.21	572.37	1.1947	0.0125618	1.90095	785.063061798722	688.707358678207	575.887779732603	1.16552	0.0107311	1.96936
robo4	ENSDARG00000009387	560765	both	3299.55	3418.14	1452.57	2.20393	0.000306372	3.51375	1576.92741249917	1525.40941662294	449.731761095528	2.31258	0.00266773	2.57386
rock1	ENSDARG00000058993	100329779	both	1214.5	1270.06	768.611	1.4363	0.0024102	2.61795	1212.57264990694	1291.32629752164	778.122618769136	1.43651	0.00177368	2.75113
rpe65a	ENSDARG00000007480	393724	both	388.64	3797.61	8730.81	2.4612	0.0181221	1.74179	621.832128157404	5432.27602013597	10710.742284592	2.41774	0.0138757	1.85774
rpl10	ENSDARG00000025581	336712	both	82884.3	74582.4	50754.3	1.30828	0.0186275	1.72985	82438.4227777675	74326.2267427435	51059.4817415094	1.31209	0.014806	1.82956
rpl10a	ENSDARG00000042905	323305	both	84541.8	73584.3	47551.9	1.22921	0.0423167	1.37349	83983.2869711586	73155.811147237	47206.426546342	1.23778	0.0347721	1.45877
rpl11	ENSDARG00000043509	415229	both	78344	65687.1	30462.6	1.58484	0.0131555	1.88089	77927.2250105256	65538.4369202835	30691.5443814015	1.58403	0.0108059	1.96634
rpl12	ENSDARG00000006691	327089	both	82691.9	67027.8	34761.6	1.42175	0.0254382	1.59451	81486.2423315265	66356.760551522	34626.4565352266	1.42333	0.0211192	1.67532
rpl13	ENSDARG00000099380	378961	RefSeq	84126	67252.4	44431.3	1.16868	0.0611976	1.21327	83605.3296307629	66978.7252026878	44522.4813254143	1.17113	0.0498269	1.30254
rpl13a	ENSDARG00000044093	560828	both	89903.1	70585.3	43437.6	1.29022	0.0363586	1.43939	88320.5660650565	69008.0904253098	42876.6749448741	1.30242	0.028563	1.5442
rpl14	ENSDARG00000103433	323365	both	65518.9	50051.4	23936.6	1.53402	0.0233155	1.63236	64539.3736138368	49461.1826947351	23778.9649785242	1.55131	0.0185217	1.73232
rpl15	ENSDARG00000009285	445053	RefSeq	68388	62770.4	46987.3	1.12561	0.0593229	1.22678	67798.1626104617	62488.5853726538	47234.3542145899	1.12531	0.0491325	1.30863
rpl18a	ENSDARG00000025073	394035	both	96281.6	72517.5	45001.8	1.48532	0.0126687	1.89727	95370.5878180411	72210.7731002867	45196.597455536	1.48552	0.0101278	1.99448
rpl19	ENSDARG00000013307	406489	both	81174.2	67849.7	45805	1.2231	0.0370739	1.43093	80479.6515740717	67466.2371532128	46056.5770329628	1.22309	0.030111	1.52127
rpl22	ENSDARG00000070437	557397	both	41112.3	33196.9	11252.1	1.58933	0.0276321	1.55859	39942.9981071107	32504.6658441327	11110.3968474499	1.60295	0.0220741	1.65612
rpl22l1	ENSDARG00000010244	735250	RefSeq	10083.3	7719.12	4391.38	1.20519	0.0542126	1.2659	10020.2417776364	7699.59350432377	4407.75646795339	1.20507	0.0450067	1.34672
rpl23	ENSDARG00000053457	336812	RefSeq	76314.3	59070.6	28715.7	1.3695	0.0512232	1.29053	75853.8035082008	58907.6940217736	28873.3568761587	1.36906	0.0432457	1.36406
rpl23a	ENSDARG00000006316	335539	both	78882.2	53416.3	31203.3	1.43138	0.0348372	1.45796	78190.5320522923	53122.3587517534	31328.102612845	1.43538	0.028563	1.5442
rpl24	ENSDARG00000099104	192301	both	77434.6	61267	35059.8	1.39286	0.0241103	1.6178	76723.3968749209	60908.040675912	35119.5243332585	1.39248	0.019963	1.69978
rpl26	ENSDARG00000101794	450017	both	93035.5	70370.4	34925.2	1.41348	0.0384008	1.41566	405.162496002558	786.403205906435	634.632185357501	1.51766	0.015862	1.79964
rpl27	ENSDARG00000015128	325618	both	70540.1	50108.5	26779.2	1.45265	0.0354463	1.45043	70162.0963101601	49991.2552123695	26972.3493892153	1.45204	0.0297277	1.52684
rpl28	ENSDARG00000005791	394036	both	78682.1	55864.4	30068.2	1.43959	0.0348224	1.45814	78170.1281855871	55670.1890646163	30247.5907585641	1.44018	0.0290014	1.53758
rpl29	ENSDARG00000077717	445040	both	36248.4	23789.5	9411.88	1.53851	0.040991	1.38731	35972.9886139058	23681.0864538762	9442.44093692003	1.54223	0.0342406	1.46546
rpl3	ENSDARG00000003599	322571	both	98243.3	85029.4	82404.9	1.03109	0.035609	1.44844	97247.7435549162	84525.2862791241	82506.0361886473	1.03291	0.0281553	1.55044
rpl30	ENSDARG00000035871	336713	both	54221.1	41606.2	19047.9	1.45492	0.0341999	1.46598	46555.7941449846	36896.1425413223	17337.3038436891	1.44365	0.0284265	1.54628
rpl31	ENSDARG00000053365	677758	both	76040.3	54649.5	22978.5	1.51952	0.0448116	1.34861	75633.247425245	54522.0210382806	23144.3327931667	1.51819	0.0383215	1.41656
rpl32	ENSDARG00000054818	556556	both	81126.6	59345.5	24493.6	1.41118	0.0488027	1.31156	80693.4063681258	59214.3235620839	24671.687339414	1.40976	0.0413667	1.38335
rpl34	ENSDARG00000029500	394097	RefSeq	52703.5	37184.2	18978.6	1.38255	0.0516619	1.28683	52237.7852160229	36835.2035475067	18976.369062928	1.39091	0.042772	1.36884
rpl35	ENSDARG00000018334	192299	both	76600.9	50252.7	28545.4	1.54426	0.0187023	1.72811	76190.9531151861	50128.6097698587	28752.0159727368	1.5435	0.0155595	1.808
rpl35a	ENSDARG00000088030	436760	both	74711.2	51454	25194.9	1.57892	0.0324071	1.48936	73738.6026597654	50974.9846839646	25200.3869900381	1.58082	0.0275559	1.55979
rpl36	ENSDARG00000100588	405888	both	58874.1	45233.4	15924.4	1.64205	0.0316579	1.49952	58333.6832973659	44951.6971523787	15946.6985695521	1.64271	0.0269339	1.5697
rpl36a	ENSDARG00000058105	195819	both	76130.7	51110.4	24001.1	1.64476	0.015769	1.8022	75722.6357936676	50992.3958250548	24175.730472253	1.64343	0.0132331	1.87834
rpl37	ENSDARG00000034291	415159	both	74037.8	51547.9	21654.8	1.6261	0.0186032	1.73041	70508.9620441478	49751.3683795715	20943.8251398406	1.64312	0.0147277	1.83187
RPL37A	ENSDARG00000115271	572109	both	79952.9	55911.8	28795.5	1.57423	0.0203279	1.69191	79508.0388738258	55742.7354858254	28989.8826643655	1.57454	0.0171048	1.76688
rpl38	ENSDARG00000006413	436759	both	41200.7	26179.6	8637.5	1.80201	0.0249035	1.60374	40853.3992072412	26012.244788728	8612.31507382721	1.80695	0.0212856	1.67191
rpl39	ENSDARG00000036316	415168	both	68430.7	46126	21366.2	1.6	0.0254455	1.59439	68019.6903061177	46005.0711883345	21491.7852513253	1.59932	0.0215905	1.66574
rplp0	ENSDARG00000051783	58101	both	123974	107103	93965.9	1.30458	0.00713874	2.14638	123417.16002334	106912.14457863	94665.1651299581	1.3061	0.00531071	2.27485
rplp1	ENSDARG00000021864	336719	both	147206	114624	74377.3	1.49176	0.0108485	1.96463	144420.511764557	112693.610706186	73800.307879646	1.49394	0.00868629	2.06117
rplp2	ENSDARG00000101406	335629	both	52956.1	38037.1	12199.7	2.22503	0.00126376	2.89834	55285.7342566944	39857.9710978851	13135.6343069443	2.22145	0.00101328	2.99427
rplp2l	ENSDARG00000011201	558312	both	112149	78881.4	34185.4	1.94532	0.00324568	2.48869	111509.074769126	78698.3577276108	34426.1477422761	1.94377	0.00270812	2.56733
rps10	ENSDARG00000034897	394121	both	84356.2	67547.6	33244.6	1.46663	0.0203279	1.69191	82691.0420798315	66527.9701055754	33022.0601455367	1.46517	0.0170282	1.76883
rps11	ENSDARG00000053058	406686	both	79838.3	56877	26446.4	1.5357	0.0241201	1.61762	79201.9808732483	56664.5586779888	26601.5855176483	1.53387	0.0203609	1.6912
rps12	ENSDARG00000036875	337007	both	83475	69940.6	28974.4	1.62462	0.01616	1.79156	83073.8574837284	69780.9516325906	29187.3023881869	1.62381	0.0135424	1.8683
rps13	ENSDARG00000036298	415169	both	89139.4	62440.3	31507.3	1.49303	0.0378196	1.42228	87404.3352887246	61586.1078928128	31392.6251567281	1.48992	0.0320442	1.49425
rps14	ENSDARG00000036629	336687	both	81804.8	65165.3	31310.1	1.38394	0.0392797	1.40583	82836.7839848684	65772.5200393848	31798.0578578442	1.38818	0.0325361	1.48763
rps15	ENSDARG00000070849	337148	both	57613.9	45976.9	25758.6	1.28104	0.0482686	1.31634	55671.4644986921	44967.1737222366	25526.8518016256	1.26837	0.0420211	1.37653
rps15a	ENSDARG00000010160	336764	both	55037.2	40346.8	20762.1	1.54146	0.0212112	1.67344	53976.9719494631	39576.4909835938	20659.7333421464	1.54068	0.0179019	1.7471
rps16	ENSDARG00000045487	767765	both	55156.7	38932.5	20799.6	1.35477	0.0378196	1.42228	54731.9150175542	38778.480350294	20863.894227269	1.35837	0.0311749	1.50619
RPS17	ENSDARG00000104011	393818	RefSeq	58384.4	44197.6	22422.5	1.27584	0.0691975	1.15991	37385.7134800634	28257.314703745	15180.1322272994	1.87439	0.00272006	2.56542
rps17	ENSDARG00000104011	393818	both	38800.8	28938.5	15406.9	1.87699	0.00335503	2.4743	37385.7134800634	28257.314703745	15180.1322272994	1.87439	0.00272006	2.56542
rps18	ENSDARG00000100392	192300	both	81151.9	58691.1	25603.7	1.43478	0.048553	1.31378	79439.0543721083	57453.8637407436	25285.1330178248	1.44179	0.0404219	1.39338
rps19	ENSDARG00000030602	393723	both	79809.1	65251.5	27453.6	1.45145	0.0353796	1.45125	78769.6132216389	64771.3794266995	27391.2644129338	1.45698	0.0295351	1.52966
rps20	ENSDARG00000036044	406485	both	114725	83682.9	43169.2	1.57886	0.0215263	1.66703	112786.74546995	82450.4586325444	42749.555903194	1.57624	0.0185283	1.73216
rps21	ENSDARG00000025850	394166	both	52194.3	33789.3	15567.5	1.55673	0.0370484	1.43123	51882.1749677329	33673.1468684069	15665.4958409871	1.55693	0.0313001	1.50445
rps23	ENSDARG00000021838	100000341	both	77820.3	59026	32725.1	1.49721	0.0196674	1.70625	77094.5529264148	58780.0123204456	32908.4234264591	1.49454	0.0164894	1.7828
rps24	ENSDARG00000039347	394194	both	87133.1	61167.3	31891.1	1.44025	0.0448116	1.34861	86482.2748361912	60857.7418238737	31953.1045677722	1.44606	0.0380531	1.41961
rps25	ENSDARG00000041811	393788	both	70545.9	50038.8	22456.1	1.66826	0.0130335	1.88494	68788.2359520123	49152.6185831925	22257.388570535	1.66978	0.0106629	1.97213
rps26	ENSDARG00000037071	336662	both	29559	21162.2	9853.42	1.5276	0.0216111	1.66532	29401.0003094422	21109.0740006103	9924.91548147861	1.5269	0.0182219	1.73941
rps26l	ENSDARG00000030408	393715	RefSeq	51962.1	36316.9	18817	1.40672	0.0530014	1.27571	51509.0756908384	36111.6739066482	18844.4349060327	1.40385	0.0457092	1.34
rps27.1	ENSDARG00000023298	554155	RefSeq	43259.5	34984.8	17562.6	1.31321	0.0551389	1.25854	43027.8684303916	34901.5996008807	17689.7702774384	1.3125	0.0463225	1.33421
rps27.2	ENSDARG00000055475	393738	both	4467.42	867.361	1299.62	2.27625	0.00499848	2.30116	4424.72423692002	850.244056570426	1304.89622330715	2.30263	0.00412094	2.385
rps28	ENSDARG00000035860	406307	both	48193.3	31824.2	12891.3	1.57955	0.0453929	1.34301	47501.1733023239	31413.5676691481	12883.3222696702	1.58176	0.0387905	1.41127
rps29	ENSDARG00000041232	405889	both	55012	38636.3	14671.9	1.67029	0.0300075	1.52277	54558.9679569104	38515.378662709	14774.6995261833	1.66766	0.0258438	1.58764
rps3	ENSDARG00000103007	336550	RefSeq	64764.9	61428.7	47044	1.0595	0.0516619	1.28683	64105.0627368268	60866.4473944187	47254.5776984935	1.06039	0.0414148	1.38284
rps6ka3a	ENSDARG00000035556	338219	both	1460.31	1510.14	1383.31	1.2334	0.00238151	2.62315	1452.56098686768	1506.06370430052	1393.49434326602	1.22388	0.00165579	2.781
rps6ka3b	ENSDARG00000057927	100009657	both	415.845	424	363.623	2.46636	5.16427e-07	6.28699	1871.32606067369	2075.79493219583	1499.42687799944	2.65063	1.30274e-12	11.8851
rps7	ENSDARG00000042566	393725	RefSeq	98256.9	76884.4	52700.4	1.29802	0.0512135	1.29062	97720.918939936	76686.403646079	53070.2738553584	1.29825	0.0428854	1.36769
rps9	ENSDARG00000011405	114420	both	73551.1	63699.7	50810.1	1.14297	0.0426604	1.36997	73539.4220562149	63788.6172407205	51491.8790878304	1.14753	0.0337803	1.47134
rragca	ENSDARG00000069829	573492	Ens95	473.169	654.393	352.08	1.38004	0.00508673	2.29356	43.7225715110674	9.67285616121077	12.5192995594044	0.384362	0.873318	0.0588277
rras2	ENSDARG00000036252	550513	Ens95	1311.66	1998.03	1485.28	1.46948	0.00116717	2.93286	74.8141779189376	83.1865629864126	53.9292904097421	1.26465	0.202082	0.694473
rsu1	ENSDARG00000102885	553276	RefSeq	67.0404	127.781	19.2393	2.3593	0.0678077	1.16872	4021.50496631796	4878.98864771471	2632.90499964705	2.02545	8.37405e-06	5.07706
rtf2	ENSDARG00000040607	326100	both	1483.63	1224.57	1060.09	1.37564	0.000622973	3.20553	1400.0939010544	1161.71002496141	1030.43465604329	1.38667	0.000310065	3.50855
rtn3	ENSDARG00000091348	394047	RefSeq	3362.71	4473.3	5222.52	0.797853	0.0777045	1.10955	1795.5402700545	2450.13446563469	1515.79826973097	1.35896	0.00384779	2.41479
s100a10b	ENSDARG00000025254	406276	both	5754.79	6885.64	2719.48	1.80125	0.0130785	1.88344	5627.5807598245	6785.50859708935	2687.79731309983	1.80255	0.0112298	1.94963
s1pr4	ENSDARG00000074851	402857	both	169.058	70.6667	143.333	2.79336	0.000505079	3.29664	150.599968538121	68.6772787445964	137.712295153449	2.82437	0.000831706	3.08003
s1pr5a	ENSDARG00000040526	492350	both	2290.06	2788.91	2003.78	3.22732	6.84009e-19	18.1649	2278.43178207674	2781.91343196422	2014.64420602108	3.22573	1.13829e-19	18.9437
samd4a	ENSDARG00000075759	100149858	both	3009.04	2522.7	1342.91	1.56279	0.0218884	1.65979	615.030839255682	812.519917541704	416.98897763247	1.51233	0.0209518	1.67878
sash1a	ENSDARG00000007179	557132	both	7084.91	8125.7	3388.05	2.48964	5.82868e-07	6.23443	6236.78192287871	7323.31939965267	3201.08859503541	2.67008	2.04727e-08	7.68882
sat1a.1	ENSDARG00000035652	565700	both	2272.57	1748.27	634.898	3.28661	0.00121219	2.91643	2176.41244855091	1671.46954465722	600.926378851412	3.34923	0.00180341	2.74391
sat1a.2	ENSDARG00000095908	431716	both	37517.4	37320.7	18370.7	2.85899	1.72186e-06	5.764	37324.5018799479	37236.627078197	18503.5247487997	2.85896	1.29377e-06	5.88814
sat1b	ENSDARG00000032272	567881	both	1932.51	1288.46	829.215	1.4457	0.00480494	2.31831	1779.02285415032	1163.64459619366	741.527743133954	1.69839	0.000919736	3.03634
sav1	ENSDARG00000006196	447821	both	945.367	1486.9	945.613	1.26739	0.0117728	1.92912	939.549481137827	1483.81613512973	952.429789557767	1.26776	0.00929656	2.03168
sb:cb649	ENSDARG00000036245	368364	both	614.051	373.662	190.469	3.09905	6.23473e-07	6.20518	851.132725415446	706.118499768386	424.693161976719	2.53593	1.09915e-07	6.95894
sbf2	ENSDARG00000059460	378456	both	1213.53	1032.89	1187.07	1.39257	0.000148222	3.82909	1206.74297370546	1026.29003870446	1192.22252727251	1.39342	8.98509e-05	4.04648
sc:d189	ENSDARG00000102858	100002334	both	443.049	358.173	240.492	2.82346	5.62409e-08	7.24995	335.20638158485	274.709114978386	235.940645542622	2.86416	4.15752e-08	7.38117
scamp2	ENSDARG00000010279	406687	both	1269.88	1121.95	767.649	1.54787	0.000298895	3.52448	1252.40877061702	1118.18217223596	773.307503553981	1.55511	0.000169593	3.77059
scarb2a	ENSDARG00000098312	192340	both	10223.2	11179.9	10874.1	1.9589	4.01697e-07	6.3961	394.474756299853	533.941660098834	716.489144015145	1.41774	0.0201979	1.69469
scarf1	ENSDARG00000077285	100005273	both	2368.76	3039.63	1611.29	5.53836	6.45649e-23	22.19	2141.43439134206	2751.92757786446	1413.71782716967	5.82324	4.34025e-27	26.3625
schip1	ENSDARG00000035175	550605	Ens95	2367.79	2641.77	1340.02	1.15962	0.0210824	1.67608	96.1896573243484	154.765698579372	123.266949507982	0.693335	0.356027	0.448518
sec14l1	ENSDARG00000101792	100535835	Ens95	1111.51	953.516	809.014	1.34643	0.00832316	2.07971	276.909619570094	266.003544433296	228.236461198373	0.088052	0.911213	0.0403802
sec24a	ENSDARG00000104375	100000526	RefSeq	438.191	520.804	625.278	0.644786	0.369785	0.432051	1903.3892797818	1783.67467612727	1418.53294238482	1.03835	0.0254361	1.59455
sec61g	ENSDARG00000018637	436772	both	12648.3	9909.79	3675.67	1.57096	0.0255335	1.59289	12511.456741067	9860.50957073826	3653.70942526003	1.56805	0.0223184	1.65134
sele	ENSDARG00000009123	558139	both	3928.18	8182.81	3224.51	7.34977	3.01612e-31	30.5206	3906.85466768894	8204.51659593897	3252.12881631606	7.29432	3.17699e-32	31.498
selenbp1	ENSDARG00000024717	393542	both	2193.87	1691.16	1058.16	2.61017	5.6943e-06	5.24456	2182.24212475239	1686.94611451516	1066.06650863544	2.60966	4.35122e-06	5.36139
selenof	ENSDARG00000099664	352923	both	1907.25	2411.38	1415.05	1.00746	0.0320024	1.49482	1896.58799088008	2405.63932729312	1425.27410368604	1.00692	0.0246353	1.60844
selenoj	ENSDARG00000087277	572182	both	447.907	519.836	399.216	1.13282	0.0186032	1.73041	429.452813508707	479.773665596054	401.580608943973	1.13189	0.0164199	1.78463
selenop	ENSDARG00000093549	352931	both	11546.5	13048.2	11092.4	1.3124	0.000485014	3.31425	11446.5692215975	13003.2205375156	11172.9933452469	1.31394	0.000297125	3.52706
selenos	ENSDARG00000070097	735249	both	900.673	774.429	538.701	1.07032	0.0310716	1.50764	939.549481137827	816.389060006189	550.849180613795	1.08668	0.0225162	1.6475
selenot1b	ENSDARG00000027595	352921	both	1695.44	1674.7	1154.36	1.25326	0.0061978	2.20776	1686.71964762696	1670.5022590411	1162.36881293855	1.25322	0.00452195	2.34467
selp	ENSDARG00000042138	796481	Ens95	36.9208	52.274	68.2996	2.75742	0.0497595	1.30312	40.8077334103296	38.6914246448431	52.0032443236799	3.6205	0.0573393	1.24155
sema3ab	ENSDARG00000042210	30267	both	446.936	204.256	87.539	3.11357	0.000695697	3.15758	362.411537191737	173.144125285673	76.0788203994576	3.09157	0.000747266	3.12652
sema3ga	ENSDARG00000042545	544659	RefSeq	58.296	34.8493	58.68	1.2906	0.288165	0.540359	90.3599811228727	65.7754218962332	73.1897512703643	2.24196	0.00829253	2.08131
sema4c	ENSDARG00000079611	561895	both	259.417	263.306	119.284	1.67053	0.0224272	1.64923	1594.41644110359	1861.05752541695	1588.0249979583	1.49946	5.25366e-05	4.27954
SEMA4F	ENSDARG00000100308	556003	RefSeq	62.1824	46.4657	33.6688	0.150877	0.953431	0.0207109	1401.06551375465	1609.56326522547	671.227060992683	1.77421	0.000589309	3.22966
sema6d	ENSDARG00000002748	406272	both	2193.87	1738.59	920.602	1.89305	0.00980952	2.00835	2182.24212475239	1735.31039532121	927.391190438958	1.89191	0.00849594	2.07079
sema7a	ENSDARG00000078707	324910	both	2897.31	3897.31	2015.32	2.96184	7.60712e-11	10.1188	2856.54133872307	3875.91346379715	2020.42234427927	2.97887	2.04909e-11	10.6884
sept2	ENSDARG00000027590	323457	both	6880.87	8746.21	5755.45	2.2207	8.67798e-08	7.06158	6844.03986053242	8725.88354302823	5797.39871904728	2.22155	4.48447e-08	7.34829
sept6	ENSDARG00000010721	322694	both	2243.42	2100.64	1951.83	1.42906	0.000349941	3.456	2230.82275976469	2099.00978698274	1972.27119212771	1.42798	0.000232849	3.63293
sept7a	ENSDARG00000087647	394136	both	920.105	1102.59	973.51	1.19153	0.00323293	2.4904	915.259163631678	1098.83645991354	980.357457805669	1.18962	0.00237445	2.62444
sept7b	ENSDARG00000052673	100000597	both	3609.49	4113.19	2412.61	1.56075	0.000262231	3.58132	3446.31024777236	4022.94087744756	2416.22481496505	1.55604	0.000158037	3.80124
sept9a	ENSDARG00000020235	337243	RefSeq	2799.18	2939.93	1907.58	0.995724	0.0643316	1.19158	2549.51172544535	2842.85242577984	1862.48656522217	1.0138	0.0486596	1.31283
SERPINB8oneOfMany	ENSDARG00000057263	798311	both	764.649	69.6986	26.9351	3.07053	0.0221651	1.65433	768.545645894541	70.6118499768386	27.9276682479022	3.08013	0.0202373	1.69385
serpinh1a	ENSDARG00000075954	555328	both	2769.06	3450.08	3561.2	1.70534	0.000660582	3.18007	2816.70521801299	3447.40593585552	3607.48431919454	1.71356	0.000445644	3.35101
sesn3	ENSDARG00000015822	406840	both	4221.6	4346.48	2051.87	2.20892	5.64923e-06	5.24801	4199.31009046297	4336.34141707079	2066.64745034476	2.20787	3.69416e-06	5.43248
sfmbt2	ENSDARG00000045519	555450	RefSeq	127.28	32.9132	66.3757	1.54776	0.122783	0.910863	433.339264309691	301.793112229776	285.054820737208	1.12499	0.0234886	1.62914
sft2d1	ENSDARG00000007362	393343	both	464.425	851.872	605.077	1.43832	0.00226348	2.64522	461.516032616823	850.244056570426	609.593586238692	1.4403	0.0018147	2.74119
sgk1	ENSDARG00000025522	324140	both	8209.05	10461.6	8945.33	1.88305	0.000111036	3.95454	8165.43313286691	10437.0117979464	9010.04359059906	1.88382	8.22826e-05	4.08469
sh2b3	ENSDARG00000069958	101884640	RefSeq	42.7504	69.6986	14.4295	1.33167	0.369318	0.4326	170.03222254304	182.816981446883	75.1157973564265	2.10005	0.0168063	1.77453
sh3bp2	ENSDARG00000021982	101886051	both	98.1316	45.4977	32.7069	3.25944	0.00194253	2.71163	1167.87846569562	1123.98588593269	1035.24977125844	3.7592	2.72064e-12	11.5653
sh3bp4	ENSDARG00000030104	569399	both	189.462	226.521	256.845	2.18231	2.32581e-05	4.63343	395.446369000099	721.595069626323	408.32177024519	2.67381	2.60636e-06	5.58397
sh3bp4a	ENSDARG00000020000	403082	both	1541.93	1453.99	1047.58	1.4208	0.000388891	3.41017	1517.65903778416	1430.61542624307	1055.4732551621	1.43847	0.000165421	3.78141
sh3gl3a	ENSDARG00000013360	571626	Ens95	2201.65	2483.01	981.206	1.22245	0.0325845	1.48699	151.571581238367	204.097265001547	98.2283503891732	1.27268	0.053533	1.27138
sh3gl3b	ENSDARG00000007302	393150	both	1685.73	1920.58	876.352	3.51193	3.83286e-12	11.4165	1581.7854760004	1830.10438570108	864.794692641936	3.6793	1.54972e-12	11.8097
sh3glb1a	ENSDARG00000045294	792229	both	752.99	565.333	628.164	1.08862	0.00950469	2.02206	977.442376447419	754.48278057444	688.561475767243	1.17899	0.0039523	2.40315
sh3kbp1	ENSDARG00000075853	793623	both	1023.09	1831.52	1792.14	1.94486	5.1629e-05	4.28711	4010.81722661525	4256.05671093274	2831.28774651146	2.3445	4.48447e-08	7.34829
SH3TC1	ENSDARG00000077330	100535608	both	538.266	666.977	391.52	3.00094	1.88368e-09	8.72499	239.988336960748	155.732984195493	58.7444056248977	2.4629	0.00791278	2.10167
sh3tc2	ENSDARG00000089917	100535152	both	2012.18	2414.28	1187.07	2.97138	1.21379e-07	6.91586	2052.04602291943	2417.24675468657	1197.03764248767	3.00449	5.56403e-08	7.25461
shank3b	ENSDARG00000063054	566152	both	2148.21	1580.8	973.51	4.35009	1.31182e-18	17.8821	5373.01823236007	4044.22116100222	3803.94101997288	4.3276	3.32087e-24	23.4787
shc1	ENSDARG00000075437	323818	both	1986.92	1834.43	2062.46	1.07671	0.0120123	1.92037	2006.38022600787	1873.63223842653	2104.20534902297	1.01733	0.0112318	1.94955
shda	ENSDARG00000094243	561247	both	284.679	182.959	54.8321	1.92562	0.0298339	1.52529	282.739295771569	182.816981446883	54.8923134527732	1.92031	0.0279546	1.55355
she	ENSDARG00000087956	561493	both	1725.56	2153.88	588.724	6.12627	6.20031e-17	16.2076	1715.86802863434	2144.47221094043	593.222194507163	6.23563	6.79486e-18	17.1678
shroom4	ENSDARG00000079900	559035	both	10440.8	11590.3	7904.48	4.50468	6.68124e-28	27.1751	10384.5965402286	11581.3106818176	7963.23754282424	4.51198	4.70276e-29	28.3276
si:cabz01036022.1	ENSDARG00000074818	100003349	both	79.6712	116.164	93.3108	1.88097	0.0111327	1.9534	79.6722414201673	116.074273934529	94.3762582170487	1.88599	0.010188	1.99191
si:cabz01101003.1	ENSDARG00000105551	100333117	both	241.928	598.247	455.972	1.61906	0.0128448	1.89127	240.959949660994	596.815225146704	459.361991525839	1.62038	0.0113701	1.94424
si:ch1073-392o20.2	ENSDARG00000102599	100537576	both	5776.16	5939.87	3447.69	2.01346	5.02094e-05	4.29921	672.355988570193	390.783388912915	172.381124702569	2.1327	0.00318899	2.49635
si:ch1073-429i10.1	ENSDARG00000075664	100332057	both	596.562	348.493	658.947	2.40419	5.21999e-06	5.28233	866.678528619381	650.015934033363	856.127485254656	1.64663	0.000145941	3.83582
si:ch211-103n10.5	ENSDARG00000077504	559526	both	177.803	188.767	19.2393	2.99482	0.00628037	2.20201	176.833511444762	188.62069514361	19.2604608606222	2.99058	0.00630366	2.20041
si:ch211-106h4.9	ENSDARG00000075706	561671	Ens95	417.788	635.032	485.793	1.40538	0.0212384	1.67288	161.287708240827	253.428831423722	255.201106403244	1.07884	0.151278	0.820225
si:ch211-106k21.5	ENSDARG00000086052	796902	RefSeq	19.432	9.68036	1.92393	0.14133	0.971596	0.0125144	1111.52492908136	1213.94344823195	755.973088779421	2.68199	2.36222e-08	7.62668
si:ch211-114m9.1	ENSDARG00000102424	567298	RefSeq	93.2736	155.854	100.045	0.865603	0.292119	0.53444	420.708299206493	579.404084056525	338.021088103919	1.26563	0.0145699	1.83654
si:ch211-119e14.1	ENSDARG00000099518	560599	both	435.277	247.817	278.97	2.22839	1.37392e-05	4.86204	434.310877009937	247.625117726996	281.202728565084	2.23694	1.03806e-05	4.98378
si:ch211-130m23.3	ENSDARG00000057395	558547	RefSeq	13.6024	25.1689	42.3265	2.80388	0.120813	0.917887	176.833511444762	92.8594191476234	87.635096915831	2.77009	0.022911	1.63996
si:ch211-132p1.3	ENSDARG00000090889	793246	both	162.257	105.516	155.839	2.11619	0.00692353	2.15967	151.571581238367	99.6304184604709	145.416479497698	1.93698	0.00671616	2.17288
si:ch211-136m16.8	ENSDARG00000090767	100000629	both	264.275	292.347	262.617	1.93573	5.3341e-05	4.27294	221.527695656075	275.676400594507	258.090175532337	1.88553	9.30419e-05	4.03132
si:ch211-145b13.6	ENSDARG00000069998	100317105	both	4305.16	6523.6	3192.77	6.70513	2.92749e-21	20.5335	4303.27264938928	6551.42547798805	3236.72044762756	6.63143	6.58565e-21	20.1814
si:ch211-147k10.5	ENSDARG00000029431	557634	both	305.082	352.365	177.002	2.4358	0.00680145	2.1674	355.610248290015	377.24139028722	181.048332089849	2.19393	0.00244745	2.61129
si:ch211-14k19.8	ENSDARG00000088975	567378	both	3566.74	4522.67	1637.27	5.77256	2.64653e-17	16.5773	3548.32958129818	4512.38739920482	1677.58614096019	5.72768	1.06417e-18	17.973
si:ch211-150o23.2	ENSDARG00000092746	558029	both	579.073	563.397	452.124	1.84287	4.08177e-06	5.38915	576.166331245844	552.320086805135	440.101530665217	1.90677	1.51873e-06	5.81852
si:ch211-154e10.1	ENSDARG00000094605	445235	RefSeq	0	0.968036	5.7718	-2.59557	0.361707	0.441644	9927.93857111305	6256.40336507112	5744.43245168057	3.2706	7.48732e-17	16.1257
si:ch211-156j16.1	ENSDARG00000092035	564557	both	22654.8	25212.5	11519.5	4.66363	7.78146e-24	23.1089	22534.6133568042	25157.164304077	11605.3906915679	4.65436	1.93352e-24	23.7137
si:ch211-156l18.7	ENSDARG00000022334	556118	both	537.295	47.4338	7.69573	3.58457	0.023328	1.63212	479.00506122125	33.8549965642377	4.81511521515555	4.01814	0.0139801	1.85449
si:ch211-160o17.2	ENSDARG00000002897	555899	Ens95	741.331	655.361	368.433	2.0249	6.38952e-05	4.19453	61.2116001154944	39.6587102609641	46.2251060654933	0.707999	0.504904	0.296791
si:ch211-161c3.6	ENSDARG00000078781	100334833	both	5860.69	3280.68	6196.99	3.48225	1.01473e-10	9.99365	90.3599811228727	42.5605671093274	118.451834292826	4.84855	3.66787e-06	5.43559
si:ch211-166a6.5	ENSDARG00000079745	100000230	both	1464.2	1188.75	780.155	1.29554	0.0186191	1.73004	1316.53520883325	1025.32275308834	749.231927478203	1.29565	0.0140603	1.85201
si:ch211-169p10.1	ENSDARG00000012449	799619	both	225.411	149.078	61.5659	2.70549	0.000535844	3.27096	239.016724260502	161.53669789222	74.1527743133954	2.63244	0.000434566	3.36194
si:ch211-173m16.2	ENSDARG00000093284	108191294	both	84.5292	33.8813	4.80983	3.52995	0.0353213	1.45196	84.5303049213971	38.6914246448431	4.81511521515555	3.58551	0.0295852	1.52893
si:ch211-176g6.2	ENSDARG00000079791	572157	both	71.8984	165.534	130.827	1.85624	0.0299541	1.52354	70.9277271179539	161.53669789222	131.934156895262	1.76118	0.0341325	1.46683
si:ch211-189a15.5	ENSDARG00000088428	100149436	both	201.121	276.858	311.677	2.12353	0.000111681	3.95202	479.00506122125	592.94608268222	428.545254148844	2.41702	1.037e-07	6.98422
si:ch211-191j22.3	ENSDARG00000095459	325517	both	902.616	813.151	472.326	1.25416	0.0299789	1.52318	887.082395324546	767.057493584014	467.066175870088	1.23542	0.027882	1.55468
si:ch211-195o20.7	ENSDARG00000089221	564006	both	327.429	369.79	241.454	1.17027	0.0463275	1.33416	325.490254582391	368.53581974213	247.496922058995	1.14495	0.0465074	1.33248
si:ch211-197h24.8	ENSDARG00000094881	100534935	Ens95	92.302	72.6027	81.7672	1.46924	0.0423712	1.37293	2.91483810073783	28.0512828675112	46.2251060654933	0.889117	0.668941	0.174612
si:ch211-199g17.9	ENSDARG00000076609	108180085	both	462.481	443.361	324.183	1.90217	9.23648e-05	4.03449	277.88123227034	274.709114978386	176.233216874693	2.14807	0.00101509	2.99349
si:ch211-1a19.3	ENSDARG00000100968	557223	both	1263.08	2281.66	1179.37	2.81834	6.04213e-07	6.21881	1236.86296741309	2183.16363558527	1152.73858250824	3.01708	1.00258e-07	6.99888
si:ch211-212g7.6	ENSDARG00000079369	556439	both	1084.31	1171.32	1482.39	2.11065	1.05348e-06	5.97737	1078.490097273	1174.28473797099	1492.68571669822	2.11196	8.72518e-07	6.05923
si:ch211-214j24.10	ENSDARG00000045847	558894	both	3380.2	1908.97	2422.23	1.29607	0.0482658	1.31636	3361.77994285096	1904.5853781424	2439.3373679978	1.29679	0.0407254	1.39013
si:ch211-214p16.1	ENSDARG00000044129	368901	RefSeq	6676.83	2840.22	3692.03	3.74142	0.0508682	1.29355	6648.74570778299	2838.98328331536	3724.0101074013	3.73591	0.0391361	1.40742
si:ch211-214p16.2	ENSDARG00000094975	368902	both	704.41	599.215	581.99	4.59026	7.85089e-08	7.10508	713.163721980522	607.455366924036	596.111263636257	4.49407	9.12817e-09	8.03962
si:ch211-218g4.2	ENSDARG00000078145	568268	both	463.453	611.799	339.574	1.86005	0.00147877	2.8301	342.007670486572	518.465090240897	270.609475091742	1.72886	0.00654049	2.18439
si:ch211-225h24.2	ENSDARG00000104936	103909705	Ens95	361.435	354.301	153.915	2.86757	1.03481e-05	4.98514	0	1.93457123224215	0	-3.39529	1	0
si:ch211-226l4.6	ENSDARG00000105573	103911376	both	101.046	37.7534	10.5816	2.94593	0.0322008	1.49213	78.7006287199214	41.5932814932063	10.5932534733422	2.90854	0.0284658	1.54568
si:ch211-226m16.2	ENSDARG00000036785	100003708	both	515.919	548.877	862.884	1.14413	0.0303952	1.51719	513.011505729858	545.549087492287	868.646784814061	1.18428	0.0218226	1.66109
si:ch211-248e11.2	ENSDARG00000058940	557793	both	5823.77	3654.34	1853.71	6.47089	9.30131e-25	24.0315	2339.64338219223	1215.87801946419	786.789826156416	5.57627	1.51164e-20	19.8206
si:ch211-250c4.4	ENSDARG00000092199	100535981	both	4615.1	4803.4	2640.6	3.4546	1.17229e-10	9.93097	592.683747150025	597.782510762825	188.752516434097	3.55653	3.82504e-08	7.41736
si:ch211-255g12.6	ENSDARG00000094310	799480	both	138.939	443.361	35.5928	2.99463	0.0101556	1.9933	138.94061613517	442.049526567332	35.631852592151	2.99227	0.0098354	2.00721
si:ch211-284f22.3	ENSDARG00000097055	101884856	Ens95	2812.78	2139.36	1956.64	1.91025	1.71058e-07	6.76686	53.4386985135269	27.0839972513901	123.266949507982	0.844335	0.546249	0.26261
si:ch211-285f17.1	ENSDARG00000059333	562465	both	1432.14	1175.2	736.866	1.20439	0.0315097	1.50156	4772.56158360807	5000.86663534597	3193.38441069116	1.42995	0.000449871	3.34691
si:ch211-287a12.9	ENSDARG00000057004	563523	both	2669.96	2376.53	825.367	4.91521	2.21885e-15	14.6539	284.682521172061	207.966407466031	66.4485899691466	3.06649	0.00041161	3.38551
si:ch211-33e4.2	ENSDARG00000097340	100535909	both	1976.23	2223.58	657.023	6.97187	6.53259e-20	19.1849	2000.5505498064	2224.75691707848	673.153107078746	6.91341	6.71028e-21	20.1733
si:ch211-51a6.2	ENSDARG00000030967	562156	Ens95	233.184	242.977	224.138	1.90521	6.18314e-05	4.20879	49.5522477125431	42.5605671093274	36.5948756351822	1.24504	0.273004	0.563831
si:ch211-66e2.3	ENSDARG00000078824	100141487	both	1212.56	1800.55	1056.24	4.95934	3.04731e-23	22.5161	624.746966258141	879.262625054059	750.194950521234	5.14071	6.22696e-25	24.2057
si:ch211-67e16.3	ENSDARG00000078193	100004440	both	49.5516	153.918	180.85	2.31371	0.0352472	1.45287	62.1832128157404	264.068973201054	303.352258554799	2.23889	0.0324977	1.48815
si:ch211-71m22.1	ENSDARG00000058638	100149582	both	2109.34	2263.27	1966.26	3.96047	1.29652e-14	13.8872	2029.69893081378	2224.75691707848	1978.0493303859	3.95683	4.56482e-14	13.3406
si:ch211-71n6.4	ENSDARG00000102234	100148657	both	162.257	155.854	145.257	1.83608	0.000650662	3.18664	526.614083533301	550.385515572893	304.315281597831	2.41198	3.35019e-07	6.47493
si:ch211-74m13.1	ENSDARG00000094952	100334824	RefSeq	1.9432	26.137	1.92393	-0.476786	0.910046	0.0409365	5427.42854357384	7569.00994614742	2853.43727650118	2.31821	0.000192515	3.71554
si:ch211-74m13.3	ENSDARG00000076144	100334824	RefSeq	264.275	364.95	118.322	1.93908	0.0516619	1.28683	5427.42854357384	7569.00994614742	2853.43727650118	2.31821	0.000192515	3.71554
si:ch211-79l17.1	ENSDARG00000105288	100535053	Ens95	2258.97	1942.85	627.202	2.33642	0.000147797	3.83033	220.556082955829	302.760397845897	114.599742120702	1.31344	0.0778097	1.10897
si:ch73-106k19.2	ENSDARG00000102568	799646	both	235.127	146.174	117.36	5.83684	5.9775e-11	10.2235	243.874787761732	180.882410214641	141.564387325573	2.60571	2.70294e-05	4.56816
si:ch73-109i22.2	ENSDARG00000089983	570350	both	185.576	179.087	159.686	1.83513	0.0268732	1.57068	177.805124145008	151.863841731009	147.34252558376	2.03981	0.0227716	1.64261
si:ch73-116o1.2	ENSDARG00000075285	100536317	both	150.598	127.781	100.045	4.70322	2.28865e-08	7.64042	255.534140164683	325.975252632803	193.567631649253	3.64463	9.65154e-10	9.0154
si:ch73-138n13.1	ENSDARG00000075349	504038	both	4839.54	4619.47	2482.84	1.37538	0.00647391	2.18883	4813.3693170184	4592.67210534287	2510.6010731821	1.36104	0.00515326	2.28792
si:ch73-208g10.1	ENSDARG00000079808	100002730	both	792.825	403.671	677.224	3.07978	3.68799e-09	8.43321	788.949512599706	402.390816306368	682.783337509057	3.08645	2.99134e-09	8.52413
si:ch73-22o12.1	ENSDARG00000062831	560816	both	1303.89	2193.57	1855.63	1.00412	0.0255137	1.59323	1297.10295482833	2188.967349282	1872.11679565248	1.00296	0.0204463	1.68939
si:ch73-234b20.5	ENSDARG00000086996	449923	both	828.775	1092.91	484.831	2.74243	0.000147507	3.83119	826.842407909298	1106.57474484251	496.919890204052	2.73357	0.000124908	3.90341
si:ch73-248e21.1	ENSDARG00000090625	557006	both	825.86	724.091	354.004	2.07636	0.00183229	2.73701	821.012731707822	721.595069626323	353.429456792417	2.07083	0.00166414	2.77881
si:ch73-248e21.5	ENSDARG00000088283	101885079	both	346.861	210.064	812.862	1.90707	0.0311744	1.5062	333.263156184359	202.162693769305	806.050287017039	1.85848	0.0329742	1.48183
si:ch73-252p3.1	ENSDARG00000099522	394213	both	478.027	362.046	316.487	1.2697	0.0132702	1.87712	455.686356415347	297.923969765292	279.276682479022	1.46895	0.00636477	2.19622
si:ch73-281i18.4	ENSDARG00000102533	100318116	both	410.015	601.151	467.516	1.64045	0.000433217	3.36329	1889.78670197836	1339.69057832769	811.828425275225	2.08294	0.000257485	3.58925
si:ch73-335l21.2	ENSDARG00000105617	100000253	RefSeq	182.661	119.068	102.93	1.38548	0.0500986	1.30017	186.549638447221	123.812558863498	120.377880378889	1.34605	0.0353702	1.45136
si:ch73-361p23.3	ENSDARG00000087225	100330352	both	214.724	101.644	177.964	3.23915	0.000365803	3.43675	616.002451955928	683.870930597601	1046.80604777482	3.39699	7.71842e-08	7.11247
si:ch73-364h19.1	ENSDARG00000097523	556746	both	221.525	242.009	114.474	1.93498	0.00630024	2.20064	220.556082955829	239.886832798027	114.599742120702	1.92735	0.00605354	2.21799
si:ch73-375g18.1	ENSDARG00000075024	562945	Ens95	2650.52	3202.26	1690.18	2.07348	8.73334e-06	5.05882	10.6877397027054	35.7895677964798	3.85209217212444	-0.389943	0.861905	0.0645406
si:dkey-110g7.8	ENSDARG00000074773	100150205	both	362.407	307.836	213.557	1.18637	0.0253936	1.59528	727.737912484211	502.021234766839	293.722028124488	1.28886	0.0238639	1.62226
si:dkey-112a7.4	ENSDARG00000104636	100330171	both	1288.34	1191.65	1080.29	1.0483	0.0410851	1.38632	1281.5571516244	1180.08845166771	1085.32696949606	1.05217	0.0325361	1.48763
si:dkey-118k5.3	ENSDARG00000087736	101882478	RefSeq	100.075	39.6895	14.4295	1.69658	0.359348	0.444485	440.140553211412	85.1211342186547	160.824848186195	1.92044	0.0458061	1.33908
si:dkey-125i10.3	ENSDARG00000094760	567654	RefSeq	111.734	111.324	125.056	1.33146	0.0864564	1.0632	217.641244855091	132.518129408587	126.156018637075	1.57725	0.0351192	1.45446
si:dkey-126g1.9	ENSDARG00000093702	792999	both	2934.23	3003.82	1409.28	6.98272	3.38481e-33	32.4705	2944.95809444545	3071.13183118442	1432.01526498726	7.00255	1.1567e-33	32.9368
si:dkey-163m14.2	ENSDARG00000059507	799082	RefSeq	33.0344	44.5297	25.9731	1.31319	0.289119	0.538924	4138.09849034747	3426.12565230085	2380.5929623729	3.15457	1.83961e-09	8.73527
si:dkey-165a24.10	ENSDARG00000105545	108190662	Ens95	278.849	149.078	61.5659	1.92815	0.0427739	1.36882	163.230933641318	118.976130782892	53.9292904097421	1.64619	0.0612513	1.21288
si:dkey-165a24.9	ENSDARG00000090052	557933	both	330.344	447.233	154.877	4.05147	1.69435e-08	7.771	114.650298629021	208.933693082153	104.00648864736	3.02844	0.000913373	3.03935
si:dkey-172h23.2	ENSDARG00000023868	108190639	RefSeq	2425.11	2103.54	1507.4	0.915594	0.0565536	1.24754	912.344325530941	831.865629864126	428.545254148844	1.55748	0.00601398	2.22084
si:dkey-183i3.5	ENSDARG00000056248	566445	both	559.641	803.47	711.855	2.22296	0.00660345	2.18023	556.734077240925	805.748918228857	718.415190101208	2.21418	0.00567661	2.24591
si:dkey-185m8.2	ENSDARG00000099026	101885702	RefSeq	311.884	230.393	778.231	1.43103	0.0529124	1.27644	322.575416481653	230.213976636816	783.900757027323	1.44583	0.043621	1.3603
si:dkey-187e18.1	ENSDARG00000079994	327519	both	2589.31	2547.87	1694.02	1.85084	9.32301e-06	5.03044	2755.49361789749	2758.69857717731	2032.94164383867	1.70384	1.12881e-05	4.94738
si:dkey-192g7.3	ENSDARG00000094012	100321723	both	401.271	313.644	353.042	1.8776	0.00536235	2.27065	399.332819801083	312.433254007108	355.355502878479	1.95627	0.00363554	2.43943
si:dkey-197i20.6	ENSDARG00000075629	565583	both	97.16	227.489	104.854	1.71559	0.0223069	1.65156	96.1896573243484	227.312119788453	104.969511690391	1.71202	0.0215288	1.66698
si:dkey-199f5.8	ENSDARG00000018853	556544	both	2051.05	2258.43	1283.26	1.03239	0.0401796	1.39599	2040.38667051648	2252.80819994599	1297.1920389629	1.03299	0.0309341	1.50956
si:dkey-19b23.10	ENSDARG00000098410	569048	both	369.208	196.511	299.172	3.07578	5.11053e-07	6.29153	325.490254582391	167.340411588946	301.426212468737	2.82286	0.000170119	3.76925
si:dkey-19b23.11	ENSDARG00000079034	798996	both	102.018	60.0183	73.1095	2.39931	0.00248478	2.60471	64.1264382162322	46.4297095738117	49.1141751945866	2.66353	0.0072287	2.14094
si:dkey-19b23.8	ENSDARG00000103211	569132	both	3957.33	5837.26	3019.61	3.22833	3.98088e-09	8.40002	3936.00304869632	5824.026694665	3041.22676989224	3.22933	2.65831e-09	8.57539
si:dkey-21c1.1	ENSDARG00000096725	100150256	RefSeq	589.761	286.539	274.16	1.10237	0.0851633	1.06975	196.265765449681	116.074273934529	83.7830047437065	1.7342	0.0197769	1.70384
si:dkey-21e2.15	ENSDARG00000092788	567711	both	437.22	337.845	1642.08	2.62279	0.0308906	1.51017	434.310877009937	337.582680026256	1658.32568009957	2.63445	0.0279051	1.55432
si:dkey-21e2.16	ENSDARG00000094077	556598	both	473.169	237.169	1155.32	2.74937	0.0160574	1.79432	471.232159619282	236.984975949664	1153.70160555127	2.74182	0.0154178	1.81198
si:dkey-229e3.2	ENSDARG00000097217	561960	both	389.611	164.566	99.0826	2.46817	0.00228101	2.64187	520.784407331825	209.900978698274	154.083686884978	2.31334	0.00212811	2.67201
si:dkey-237i9.8	ENSDARG00000103020	100333180	both	685.949	742.484	611.811	5.42617	1.35572e-28	27.8678	2440.69110301781	2814.80114291233	1198.0006655307	6.26019	1.0615e-22	21.9741
si:dkey-23a13.2	ENSDARG00000105470	101883814	both	152.541	209.096	96.1967	5.18216	6.49509e-08	7.18742	29.1483810073783	103.499560924955	77.0418434424888	3.94928	0.00264853	2.577
si:dkey-240h12.4	ENSDARG00000034210	555536	both	206.951	116.164	126.98	1.94114	0.0024482	2.61115	256.505752864929	175.078696517915	139.638341239511	1.90064	0.00235443	2.62811
si:dkey-253i9.4	ENSDARG00000061459	793952	RefSeq	1657.55	1711.49	1650.73	1.07626	0.0628585	1.20164	1663.40094282105	1757.557964492	1664.10381835776	1.10441	0.0472152	1.32592
si:dkey-25e12.3	ENSDARG00000055365	678527	both	914.275	1276.84	441.543	3.07242	1.89689e-06	5.72196	906.514649329465	1238.12558863498	407.358747202159	3.11549	2.10961e-06	5.6758
si:dkey-261h17.1	ENSDARG00000095268	561010	both	1548.73	1688.26	1725.77	1.92469	1.9438e-07	6.71135	21100.5130112411	19851.6026996529	11266.4065804209	2.31425	1.17979e-07	6.92819
si:dkey-261j4.3	ENSDARG00000035151	555453	both	68.9836	44.5297	178.926	2.04899	0.0320901	1.49363	68.984501717462	42.5605671093274	180.085309046817	2.04487	0.0330696	1.48057
si:dkey-261j4.4	ENSDARG00000035150	555524	both	187.519	53.242	145.257	2.52774	0.00863423	2.06378	186.549638447221	52.2334232705381	144.453456454666	2.53837	0.00816013	2.0883
si:dkey-262k9.4	ENSDARG00000089838	567610	both	738.416	572.11	1041.81	1.46814	0.00428873	2.36767	710.248883879784	552.320086805135	1045.84302473178	1.46945	0.00396846	2.40138
si:dkey-27i16.2	ENSDARG00000098293	100005903	both	2015.1	1668.89	1169.75	3.32984	1.97588e-10	9.70424	2004.43700060738	1665.66583096049	1177.77718162705	3.32816	1.43345e-10	9.84362
si:dkey-27o4.1	ENSDARG00000090340	561360	RefSeq	93.2736	89.0594	88.5009	1.51028	0.141434	0.849445	1493.36872027801	1002.10789830144	616.33474753991	2.83766	4.23723e-07	6.37292
si:dkey-28n18.9	ENSDARG00000097193	557582	both	1064.87	1235.21	664.719	4.9978	8.51847e-12	11.0696	1060.02945596832	1238.12558863498	670.264037949652	4.89771	2.38725e-12	11.6221
si:dkey-31f5.11	ENSDARG00000099812	335883	RefSeq	552.84	1006.76	688.768	1.13187	0.0505201	1.29654	549.932788339204	1003.07518391756	689.524498810274	1.13755	0.0418831	1.37796
si:dkey-34d22.1	ENSDARG00000103181	100535421	both	1454.48	1556.6	451.162	1.61864	0.0168524	1.77334	1343.74036444014	1391.92400159823	390.024332427599	1.60602	0.0198661	1.70189
si:dkey-38p12.3	ENSDARG00000061844	555489	both	1049.33	1252.64	1304.43	2.01451	3.89874e-06	5.40908	1000.76108125332	1226.51816124153	1291.41390070472	2.04765	2.67143e-06	5.57326
si:dkey-40c11.2	ENSDARG00000032482	798260	both	339.088	199.416	136.599	1.51357	0.0244538	1.61165	1172.73652919685	1643.41826178971	833.977955264941	1.54875	0.000772313	3.11221
si:dkey-42i9.6	ENSDARG00000013681	558619	both	3073.17	2872.16	3465	1.16822	0.00212564	2.67251	3057.66516767398	2834.14685523475	3463.03086273987	1.17696	0.00123404	2.90867
si:dkey-49n23.1	ENSDARG00000040920	558742	both	1027.95	1225.53	792.66	2.79295	1.34525e-11	10.8712	550.90440103945	798.977918916009	470.918268042213	2.69238	5.7238e-09	8.24232
si:dkey-52l18.4	ENSDARG00000075092	560708	both	1470.03	1514.01	827.291	3.29293	1.31554e-09	8.8809	1610.93385700777	1671.46954465722	900.426545234087	2.35556	5.04737e-05	4.29693
si:dkey-56i24.1	ENSDARG00000053345	100334791	Ens95	96.1884	240.073	251.073	2.27838	0.000809767	3.09164	4.85806350122972	20.3129979385426	10.5932534733422	-0.318925	1	0
si:dkey-73n10.1	ENSDARG00000069168	558609	both	672.347	400.767	283.78	1.31489	0.0240132	1.61955	669.441150469455	399.488959458005	286.01784378024	1.31544	0.0201399	1.69594
si:dkey-78a14.4	ENSDARG00000036066	794381	both	317.713	386.247	235.682	2.80279	1.43978e-08	7.8417	401.276045201575	442.049526567332	303.352258554799	2.8425	1.00951e-09	8.99589
si:dkey-7c18.24	ENSDARG00000041433	562950	both	149.626	400.767	893.667	2.28726	0.0112206	1.94998	148.656743137629	354.026535500314	747.305881392141	2.56805	0.00251874	2.59882
si:dkey-7j14.6	ENSDARG00000090552	556585	both	5182.51	5168.35	2858	1.37913	0.0071055	2.14841	5146.63247320276	5140.1557640674	2865.95657606058	1.37796	0.00551066	2.2588
si:dkey-91m11.5	ENSDARG00000042329	560226	both	189.462	210.064	155.839	1.83091	0.00577475	2.23847	1660.48610472032	1892.97795074895	1494.61176278428	1.75991	1.96939e-07	6.70567
si:dkey-93m18.3	ENSDARG00000092664	101884722	both	297.31	81.3151	83.6911	4.14514	5.50026e-06	5.25962	299.256711675751	81.2519917541704	85.7090508297687	4.05377	6.26072e-06	5.20338
si:dkeyp-19e1.3	ENSDARG00000051836	553000	both	654.858	984.493	327.069	2.91622	3.74011e-07	6.42712	319.660578380915	613.259080620763	125.192995594044	3.19943	2.17976e-05	4.66159
si:dkeyp-23e4.3	ENSDARG00000074819	566257	both	683.035	892.53	632.974	2.50792	7.10701e-08	7.14831	679.157277471914	928.594191476234	675.079153164808	2.43847	3.31864e-07	6.47904
si:dkeyp-27c8.2	ENSDARG00000088040	557652	both	309.94	509.187	151.991	1.71752	0.0153245	1.81461	308.001225977964	507.824948463565	153.120663841946	1.71927	0.0133365	1.87496
si:dkeyp-4c4.2	ENSDARG00000116197	108183680	Ens95	284.679	226.521	159.686	1.38611	0.0237316	1.62467	41.7793461105756	40.6259958770852	29.8537143339644	0.170336	0.906457	0.0426529
si:dkeyp-97a10.2	ENSDARG00000098129	100537548	both	3101.35	4541.06	2411.65	7.09558	1.10821e-29	28.9554	3208.2651362121	4789.99837103157	2448.00457538508	6.9067	7.19832e-30	29.1428
si:rp71-1h20.9	ENSDARG00000099717	100536897	both	54.4096	47.4338	39.4406	3.01992	0.00466877	2.3308	53.4386985135269	47.3969951899328	40.4469678073066	2.94145	0.0055185	2.25818
si:rp71-36a1.3	ENSDARG00000071662	100034563	RefSeq	12.6308	4.84018	20.2013	1.03342	0.709761	0.148888	385.730241997639	410.129101235336	184.900424261973	1.49664	0.0104158	1.98231
si:zfos-2326c3.2	ENSDARG00000098680	561669	both	2006.35	1830.56	846.531	1.91536	0.000139786	3.85454	1826.63187646237	1602.79226591262	843.608185695252	1.86049	8.67029e-05	4.06197
si:zfos-464b6.2	ENSDARG00000054363	794433	both	1387.44	1742.47	882.123	4.44902	8.22184e-08	7.08503	1379.69003434924	1741.11410901794	887.907245674683	4.46273	8.48024e-08	7.07159
sik1	ENSDARG00000058606	553465	both	14319.4	13932	10896.2	2.6372	2.4012e-05	4.61957	14185.5454235908	13856.3664509344	10970.7585062104	2.63898	2.16875e-05	4.66379
six3a	ENSDARG00000058008	30635	both	1137.74	784.11	1107.22	1.7387	1.70717e-05	4.76772	1130.95718308628	781.56677782583	1115.18068383002	1.73955	1.12994e-05	4.94695
sla2	ENSDARG00000020788	568515	both	303.139	227.489	581.028	2.16031	0.00570723	2.24357	301.199937076242	227.312119788453	572.99871060351	2.14721	0.00315044	2.50163
slc12a4	ENSDARG00000014378	562826	both	948.281	1389.13	462.706	1.32564	0.0333381	1.47706	835.586922211511	1317.44300915691	447.805715009466	1.33238	0.0267971	1.57191
slc16a1a	ENSDARG00000016963	100534752	both	983.259	1273.94	1204.38	3.58345	7.6552e-16	15.116	1010.47720825578	1301.96643929897	1221.11321856345	3.61302	2.0739e-16	15.6832
slc18a2	ENSDARG00000015110	553304	both	27.2048	59.0502	110.626	2.14402	0.0354815	1.45	27.2051556068864	58.0371369672646	111.710672991609	2.14456	0.0345563	1.46147
slc22a31	ENSDARG00000078882	570565	both	1728.48	2054.17	1255.37	3.1929	1.27571e-12	11.8942	1751.81769854344	2066.12207603462	1299.11808504897	3.16838	9.19257e-13	12.0366
slc22a7b.1	ENSDARG00000056643	393320	Ens95	170.03	257.498	199.127	2.38533	0.000301759	3.52034	183.634800346483	272.774543746144	209.939023380782	0.867177	0.40296	0.394738
slc25a33	ENSDARG00000039931	406436	both	844.32	619.543	1314.05	1.2421	0.0429951	1.36658	839.473373012495	618.095508701368	1323.19366112474	1.24628	0.0368437	1.43364
slc25a43	ENSDARG00000102048	796731	both	1396.19	1688.26	1166.87	1.52218	0.000187473	3.72706	1388.43454865145	1684.04425766679	1175.85113554098	1.5223	0.000116762	3.9327
slc26a10	ENSDARG00000078800	100150270	RefSeq	24.29	44.5297	75.9954	1.86552	0.104434	0.981156	755.914680791344	937.299762021323	343.799226362106	3.85888	6.66033e-12	11.1765
slc29a1a	ENSDARG00000101289	563580	both	5166	8003.73	1450.65	2.21652	0.00168956	2.77223	5127.20021919784	7963.66247752482	1450.31270280485	2.2336	0.0013726	2.86246
slc2a1b	ENSDARG00000007412	100321338	RefSeq	84.5292	121.005	199.127	1.66044	0.171038	0.766907	992.016566951108	4104.19286920173	3304.13206063974	2.24056	0.000420388	3.37635
slc38a2	ENSDARG00000045886	566537	both	11961.4	6277.72	9409.96	1.68643	0.000566795	3.24657	11844.9304286983	6192.56251440713	9282.57911177686	1.70605	0.00035459	3.45027
slc39a3	ENSDARG00000101434	792986	RefSeq	87.444	38.7215	3.84787	3.36536	0.0796772	1.09867	1197.026846703	959.547331192108	461.288037611901	1.83572	0.00511724	2.29096
slc44a2	ENSDARG00000037059	324345	both	3773.69	3255.51	2047.06	2.21422	2.024e-07	6.69379	3670.75278152917	3171.72953526101	2023.31141340836	2.27108	3.53314e-08	7.45184
slc47a4	ENSDARG00000079340	555258	both	48.58	155.854	75.9954	2.53361	0.00315475	2.50104	13.6025778034432	106.401417773318	52.0032443236799	3.22388	0.00947973	2.0232
SLC5A10	ENSDARG00000074212	100007379	both	179.746	96.8036	71.1855	2.90461	0.00154213	2.81188	338.121219685588	146.060128034283	84.7460277867376	2.73929	0.000560426	3.25148
slc6a2	ENSDARG00000016141	565776	both	2323.1	2910.89	1583.4	3.8631	7.48236e-18	17.126	199.180603550418	235.050404717422	154.083686884978	2.90773	6.99545e-07	6.15518
slc6a4a	ENSDARG00000061165	664719	both	317.713	104.548	96.1967	2.76054	0.000408642	3.38866	424.594750007477	147.994699266525	119.414857335858	2.17626	0.00466207	2.33142
slc7a3a	ENSDARG00000020645	492363	both	4121.53	8144.09	3217.78	1.3565	0.0238709	1.62213	4100.20559503788	8125.19917541704	3241.53556284271	1.35656	0.0198752	1.70169
slc7a3b	ENSDARG00000061566	100003376	RefSeq	1348.58	789.918	969.662	1.17606	0.0565536	1.24754	1275.72747542292	706.118499768386	936.058397826238	1.23177	0.0368145	1.43398
slc7a5	ENSDARG00000099265	797250	RefSeq	43.722	224.584	115.436	1.75761	0.0987034	1.00567	1023.10817335898	1530.24584470354	452.620830224621	1.90341	0.00266469	2.57435
slc7a6	ENSDARG00000054423	57957	both	384.754	312.676	202.975	2.12539	5.08402e-05	4.29379	382.815403896902	311.465968390987	205.123908165626	2.12385	4.05606e-05	4.3919
slco1c1	ENSDARG00000016749	562772	both	401.271	796.694	315.525	3.70132	4.60516e-08	7.33676	460.544419916577	959.547331192108	324.538765501484	3.58469	7.06288e-08	7.15102
slco1d1	ENSDARG00000104108	326845	both	2140.43	2323.29	1021.61	5.25041	3.35188e-16	15.4747	2127.83181353862	2317.6163362261	1028.50860995722	5.24727	2.831e-16	15.5481
slco5a1a	ENSDARG00000071685	556735	both	1247.53	1485.94	859.998	2.00346	2.86624e-06	5.54269	1230.06167851136	1453.83028102998	859.979577426781	2.00556	1.28811e-06	5.89005
slf2	ENSDARG00000003328	100320914	both	442.078	573.078	356.89	1.23503	0.0149956	1.82404	419.736686506247	562.960228582467	358.244572007573	1.27066	0.00950391	2.0221
smad1	ENSDARG00000027199	30628	both	1233.93	1221.66	935.032	1.03563	0.0128273	1.89186	1183.42426889956	1177.18659481935	922.576075223803	1.02433	0.00982644	2.0076
smad5	ENSDARG00000037238	30641	both	2178.33	2526.58	1765.21	1.23389	0.0103632	1.98451	2166.69632154845	2506.23703136971	1778.70356047846	1.23608	0.00780275	2.10775
smad6a	ENSDARG00000053209	116992	both	861.809	1227.47	1122.61	1.90916	1.96041e-06	5.70765	833.643696811019	1224.58359000928	1131.55207556155	1.90593	1.92224e-06	5.71619
smad6b	ENSDARG00000031763	564395	RefSeq	226.383	635.032	942.727	0.829113	0.355456	0.449214	1514.74419968343	2063.22021918626	1377.12295153449	1.42412	0.000294014	3.53163
smad7	ENSDARG00000016858	326282	both	3205.31	2762.78	1942.21	1.92967	3.22948e-06	5.49087	3156.76966309907	2707.43243952289	1928.93515519131	1.98071	1.29222e-06	5.88867
smox	ENSDARG00000036967	387290	both	5724.67	7245.75	3537.15	1.64719	0.00154463	2.81118	4999.91895546562	6779.70488339263	3215.53394068087	1.65542	0.00124766	2.9039
smpd1	ENSDARG00000076121	556700	Ens95	298.281	123.909	127.942	1.88195	0.0108121	1.96609	91.3315938231187	35.7895677964798	57.7813825818666	0.991224	0.334362	0.475783
smpd2b	ENSDARG00000052701	797914	both	1329.15	1458.83	712.817	2.94646	2.20537e-10	9.65652	565.478591543139	672.263503204148	365.948756351822	2.73909	2.59407e-09	8.58602
smtnb	ENSDARG00000059442	664685	Ens95	1335.95	1448.18	856.15	1.4574	0.0121754	1.91452	81.6154668206592	117.04155955065	95.3392812600798	0.968564	0.232339	0.633879
snap23.1	ENSDARG00000012874	393159	RefSeq	1239.76	1487.87	1219.77	0.965856	0.0456769	1.3403	1219.37393880866	1474.14327896852	1172.96206641189	1.01131	0.028427	1.54627
snrkb	ENSDARG00000017665	393806	RefSeq	95.2168	120.037	39.4406	1.18075	0.220861	0.655882	1848.97896856803	2480.12031973444	1419.49596542786	1.79333	0.000160094	3.79563
snrpd3	ENSDARG00000013800	415171	RefSeq	690.807	691.178	404.026	1.16182	0.0535638	1.27113	694.703080675849	686.772787445964	400.617585900941	1.15701	0.0491325	1.30863
sntb2	ENSDARG00000051763	100331323	both	2652.47	2582.72	1315.97	1.21168	0.0145414	1.83739	2639.87170656823	2575.88159573043	1325.11970721081	1.21048	0.0111823	1.95147
snx12	ENSDARG00000019060	394098	both	3982.59	4827.6	3551.58	1.27033	0.000793348	3.10054	3895.19531528599	4789.99837103157	3570.88944355935	1.27495	0.000471499	3.32652
snx18a	ENSDARG00000067713	562372	both	743.274	1107.43	1044.7	1.46958	0.00414697	2.38227	739.397264887163	1104.64017361027	1052.584186033	1.47183	0.00339141	2.46962
snx5	ENSDARG00000020442	406797	both	1295.14	1423.98	1100.49	1.6421	0.00104927	2.97911	1264.06812301997	1408.36785707229	1101.69836122759	1.64198	0.000849576	3.0708
snx8a	ENSDARG00000074842	555448	both	129.223	112.292	105.816	1.75888	0.00484658	2.31456	128.252876432464	112.205131470045	106.895557776453	1.77261	0.00396483	2.40178
snx9a	ENSDARG00000000837	368424	both	209.866	225.552	136.599	2.57719	1.14802e-05	4.94005	1061.00106866857	1360.97086188235	532.551742796203	2.78397	4.20275e-08	7.37647
snx9b	ENSDARG00000069302	558917	both	2930.34	3028.02	1627.65	2.43619	1.32514e-07	6.87774	2857.51295142332	2952.15570040153	1627.50894272257	2.4667	4.86231e-08	7.31316
socs3a	ENSDARG00000025428	335409	both	36990.7	44389.3	25617.2	1.97136	0.0467144	1.33055	36793.0297329134	44286.2046484874	25802.2763919325	1.9722	0.0411571	1.38555
soga1	ENSDARG00000063075	797906	both	1864.5	1795.71	403.064	1.75777	0.0151974	1.81823	1828.57510186287	1659.86211726377	383.283171126382	1.78304	0.0118241	1.92723
sorbs2a	ENSDARG00000003046	571008	RefSeq	186.547	143.269	86.577	1.51756	0.0531736	1.2743	1193.14039590202	1336.78872147933	780.048664855199	1.37952	0.00947973	2.0232
sos1	ENSDARG00000100503	556286	both	1875.19	1835.4	808.052	3.35235	4.94618e-11	10.3057	1637.16739991441	1689.84797136352	693.376590982399	3.40164	1.20164e-10	9.92023
sox13	ENSDARG00000030297	555983	both	1786.77	2286.5	1699.79	1.78339	3.81636e-05	4.41835	1783.88091765155	2274.08848350065	1714.18101659537	1.78314	2.682e-05	4.57154
sox17	ENSDARG00000101717	30544	Ens95	277.878	347.525	129.865	3.37698	1.65179e-06	5.78205	17.489028604427	77.3828492896861	53.9292904097421	1.50779	0.210915	0.675893
sox18	ENSDARG00000058598	797246	both	900.673	1019.34	2478.03	5.62209	1.36554e-10	9.86469	13944.5854739298	11308.5361380715	10691.4818237314	6.26577	4.38335e-37	36.3582
sox7	ENSDARG00000030125	394203	both	13939.5	14080.1	7435.04	5.7901	1.59032e-31	30.7985	13622.0100574481	13879.5813057213	7277.56513618609	5.87829	3.19618e-30	29.4954
spcs1	ENSDARG00000059298	606666	both	2858.45	2554.65	1326.55	1.37178	0.0192596	1.71535	2789.5000624061	2500.43331767298	1286.59878548956	1.38905	0.0143829	1.84215
spi2	ENSDARG00000087438	103910445	both	161.286	44.5297	101.968	4.61089	1.2085e-06	5.91775	139.912228835416	43.5278527254484	114.599742120702	4.5646	1.43599e-06	5.84285
spink2.3	ENSDARG00000099689	101882741	Ens95	4.858	16.4566	14.4295	6.06356	0.0381033	1.41904	4.85806350122972	17.4111410901794	14.4453456454666	6.10225	1	0
spns2	ENSDARG00000061017	568117	both	8591.86	8892.38	5730.43	3.70329	6.87154e-14	13.1629	1220.3455515089	2644.55887447502	1388.67922805086	3.06051	3.65004e-06	5.4377
spock3	ENSDARG00000070266	562002	both	11957.5	12516.7	8750.05	2.28153	5.44519e-07	6.26399	11987.7574956344	12595.0260075125	8845.36665024074	2.28325	3.0433e-07	6.51666
spred2b	ENSDARG00000008372	793290	both	645.142	613.735	243.378	1.63276	0.00724111	2.14019	632.519867860109	601.65165322731	242.68180684384	1.64914	0.00588081	2.23056
spry4	ENSDARG00000068732	114437	both	11566.9	13404.4	5596.72	2.14059	0.000163218	3.78723	11505.8375963125	13373.69092849	5636.57387086108	2.14011	0.000126071	3.89938
sptan1	ENSDARG00000019231	553383	both	10699.3	13315.3	7832.33	1.35034	0.00218609	2.66033	10537.1397341673	13200.5468032043	7870.78733069326	1.35535	0.00143403	2.84344
sptbn1	ENSDARG00000102883	553451	both	933.707	1057.1	963.891	1.6769	0.00129544	2.88758	45544.3453240286	43827.711266446	17282.4115302363	2.76227	7.32487e-08	7.1352
sptlc1	ENSDARG00000042995	553981	both	645.142	555.653	524.272	1.08333	0.020714	1.68374	641.264382162322	554.254658037377	528.699650624079	1.08944	0.0159538	1.79714
sptlc2a	ENSDARG00000018976	553646	both	1598.28	1922.52	878.275	2.91151	2.70469e-09	8.56788	1590.52999030261	1918.12737676809	885.01817654559	2.91946	1.78188e-09	8.74912
sqstm1	ENSDARG00000075014	406452	both	4379.97	2875.07	3146.59	1.6688	0.00407389	2.38999	4341.16554469887	2868.96913741511	3164.49371940023	1.67454	0.00323804	2.48972
sra1	ENSDARG00000053619	415137	both	439.163	430.776	225.1	1.3685	0.0171575	1.76555	443.05539131215	429.474813557758	234.977622499591	1.33009	0.0169977	1.76961
srgn	ENSDARG00000077069	570867	both	6691.41	7124.75	8097.83	4.36841	3.01371e-23	22.5209	6655.54699668471	7105.68013602543	8154.87912838743	4.3794	1.85752e-23	22.7311
sri	ENSDARG00000058593	393344	both	5200.97	5238.05	2129.79	2.05216	0.000120306	3.91971	5172.8660161094	5225.27689828606	2145.61533987331	2.05126	8.95267e-05	4.04805
ssh2a	ENSDARG00000088440	325085	both	1321.38	1952.53	1546.84	1.18325	0.0103531	1.98493	1276.69908812317	1891.0433795167	1512.90920060187	1.26028	0.00544798	2.26376
sstr1a	ENSDARG00000104922	568254	RefSeq	41.7788	22.2648	17.3154	-0.162521	0.94305	0.0254651	302.171549776488	230.213976636816	200.308792950471	2.43362	8.27395e-06	5.08229
st3gal3a	ENSDARG00000015374	393326	both	1824.66	2200.35	1370.8	2.20177	1.42592e-07	6.8459	1814.97252405942	2204.44391913993	1388.67922805086	2.20287	7.1796e-08	7.1439
st3gal4	ENSDARG00000041006	504044	both	163.229	125.845	60.6039	2.58847	0.00125616	2.90095	2097.71181983099	2513.00803068256	768.492388338825	3.52906	9.86787e-10	9.00578
st3gal8	ENSDARG00000007494	445567	both	318.685	435.616	165.458	1.73013	0.0374454	1.4266	317.717352980423	434.311241638363	166.602986444382	1.72886	0.0338245	1.47077
stab1	ENSDARG00000076484	570626	both	4705.46	5043.47	2200.98	5.02658	1.19024e-17	16.9244	4052.59657272583	4471.76140332774	2098.42721076479	5.15621	7.78647e-18	17.1087
stab2	ENSDARG00000045748	565194	both	2409.57	3889.57	2824.33	4.63282	1.14226e-23	22.9422	2419.3156236124	3894.29189050345	2845.73309215693	4.63093	3.09861e-24	23.5088
stard8	ENSDARG00000014003	558476	both	2882.74	3580.77	2389.52	2.34194	6.02434e-08	7.22009	2791.44328780659	3524.7887851452	2399.85342323352	2.38435	2.55306e-08	7.59294
stc1	ENSDARG00000003303	751747	both	1939.31	2513.99	603.153	4.50574	5.31243e-11	10.2747	1915.04863218475	2508.17160260195	606.704517109599	4.51094	4.18496e-11	10.3783
stk10	ENSDARG00000101894	394108	both	371.151	175.215	155.839	1.90805	0.007227	2.14104	432.367651609445	205.064550617668	164.67694035832	1.7622	0.00984668	2.00671
stk17al	ENSDARG00000015922	777621	both	826.831	855.744	790.737	1.90525	2.01521e-06	5.69568	821.984344408068	853.14591341879	796.420056586727	1.90652	1.28929e-06	5.88965
stk17b	ENSDARG00000014348	393507	both	835.576	1089.04	1086.06	1.91168	0.000148686	3.82773	818.097893607084	1083.35989005561	1092.06813079728	1.9444	0.000156897	3.80439
stk26	ENSDARG00000060390	100151762	both	1284.45	957.388	930.222	1.45814	0.000179623	3.74564	1270.86941192169	955.678188727624	937.021420869269	1.46163	9.82526e-05	4.00766
stk38l	ENSDARG00000045482	393957	Ens95	491.629	469.498	258.769	1.31953	0.040261	1.39512	518.841181931334	611.32450938852	397.728516771848	0.696465	0.260474	0.584235
stox1	ENSDARG00000062593	568146	both	2587.37	1552.73	865.77	1.76649	0.00196489	2.70666	2301.75048688264	1419.00799884962	829.162840049785	1.71392	0.00186952	2.72827
stox2a	ENSDARG00000070162	571741	both	5119.36	6835.31	4401	1.88612	0.000375725	3.42513	4872.63769173341	6653.95775329689	4322.04741712362	1.91089	0.000285143	3.54494
stub1	ENSDARG00000045228	324243	RefSeq	100.075	98.7397	44.2505	1.24223	0.203037	0.692425	892.912071526022	699.347500455538	333.205972888764	1.55022	0.0058756	2.23095
stx11a	ENSDARG00000044039	405846	RefSeq	185.576	131.653	187.583	1.34792	0.0616934	1.20976	184.606413046729	131.550843792466	189.715539477129	1.4011	0.0434298	1.36221
stxbp2	ENSDARG00000007603	406578	both	840.434	829.607	841.721	1.38794	0.00507922	2.2942	875.423042921595	827.02920178352	847.460277867376	1.41259	0.0033788	2.47124
stxbp3	ENSDARG00000008142	406780	both	1040.58	1248.77	927.336	1.09682	0.0291696	1.53507	1034.76752576193	1245.86387356395	934.132351740176	1.09702	0.0233704	1.63133
sult1st1	ENSDARG00000028275	323424	both	987.145	1155.84	1120.69	1.5704	2.53613e-05	4.59583	982.300439948649	1153.00445441632	1119.03277600215	1.57527	1.34996e-05	4.86968
sult2st1	ENSDARG00000033170	338214	both	1832.44	2569.17	1950.87	1.93864	0.0100382	1.99835	1820.8022002609	2561.37231148861	1957.82584648225	1.92976	0.0088433	2.05339
sult2st3	ENSDARG00000028367	777792	both	646.114	815.087	306.867	3.70491	1.28972e-09	8.88951	642.235994862568	811.552631925583	309.130396812986	3.71081	9.86787e-10	9.00578
susd1	ENSDARG00000058839	569485	both	180.718	113.26	99.0826	1.69812	0.0131116	1.88234	179.748349545499	112.205131470045	99.1913734322043	1.94253	0.0042748	2.36908
susd6	ENSDARG00000030116	336888	both	2164.72	2409.44	1677.67	1.02644	0.0134348	1.87177	2153.09374374501	2403.70475606088	1690.1054405196	1.02812	0.00947973	2.0232
svild	ENSDARG00000102056	562786	RefSeq	1692.53	1847.01	1130.31	0.988439	0.0444459	1.35217	1642.99707611589	1768.19810626933	1100.73533818456	1.04564	0.0279008	1.55438
swap70b	ENSDARG00000057286	562490	both	1406.88	1211.01	489.641	1.77466	0.00896799	2.0473	1380.66164704949	1191.69587906117	487.289659773741	1.76766	0.00845453	2.07291
syngr2a	ENSDARG00000052429	563028	both	1365.1	1531.43	465.592	1.96075	0.00894844	2.04825	1358.31455494383	1528.3112734713	468.99222195615	1.95009	0.00816013	2.0883
sypl2a	ENSDARG00000055307	393640	both	4349.85	5534.26	2554.98	2.30185	5.35715e-06	5.27107	4326.59135419518	5521.26629681911	2573.19757097912	2.30205	3.63353e-06	5.43967
sytl4	ENSDARG00000102433	553322	both	653.887	661.169	307.829	2.82275	9.72797e-07	6.01198	583.939232847812	626.801079246458	298.537143339644	2.83877	3.3752e-07	6.4717
tacc1	ENSDARG00000073753	565711	both	251.644	466.594	178.926	2.79911	4.95491e-05	4.30496	264.278654466897	518.465090240897	199.34576990744	2.49286	0.000449791	3.34699
tagapa	ENSDARG00000002353	393842	both	553.812	390.119	536.777	1.54391	0.0335892	1.4738	535.358597835515	438.180384102848	545.071042355608	1.55349	0.0222216	1.65323
tagapb	ENSDARG00000043475	447809	both	376.009	245.881	650.289	1.3859	0.0326712	1.48584	373.099276894442	248.592403343117	593.222194507163	1.47713	0.0173228	1.76138
tagln2	ENSDARG00000033466	259183	both	11607.7	13346.3	9097.32	2.53328	1.60036e-07	6.79578	11528.1846884181	13283.7333661907	9161.23820835494	2.53404	1.00549e-07	6.99762
tanc1a	ENSDARG00000077073	561438	RefSeq	180.718	178.119	209.709	0.688399	0.350737	0.455018	1053.2281670666	859.916912731637	618.260793625972	1.10197	0.0169103	1.77185
tango2	ENSDARG00000056550	445324	RefSeq	313.827	274.922	226.062	1.00882	0.0656647	1.18267	309.944451378456	258.265259504327	195.493677735315	1.16739	0.0419855	1.3769
tank	ENSDARG00000067723	767660	both	448.879	455.945	306.867	2.17587	1.106e-05	4.95624	445.970229412888	455.591525193027	309.130396812986	2.16448	8.52905e-06	5.0691
tbc1d1	ENSDARG00000062081	561193	both	334.23	522.74	435.771	1.08377	0.0313083	1.50434	333.263156184359	499.119377918475	419.878046761564	1.15479	0.0162142	1.79011
tbc1d10aa	ENSDARG00000102070	325772	both	2290.06	2213.9	1320.78	1.33121	0.0035889	2.44504	2290.09113447969	2212.1822040689	1336.67598372718	1.31144	0.00277548	2.55666
tbc1d16	ENSDARG00000036994	450056	both	1015.32	613.735	761.878	2.19552	1.46443e-07	6.83433	975.499151046927	593.913368298341	755.01006573639	2.34341	1.32303e-08	7.87843
tbc1d4	ENSDARG00000075156	321065	both	158.371	602.119	460.782	2.12047	0.0016519	2.78202	500.380540626661	1321.31215162139	987.098619106887	2.61574	5.814e-07	6.23553
tbrg1	ENSDARG00000074996	573117	RefSeq	289.537	399.799	269.351	0.982094	0.0930197	1.03142	571.308267744615	700.314786071659	334.168995931795	1.16783	0.0380261	1.41992
tbx20	ENSDARG00000005150	57936	both	81.6144	53.242	75.0334	1.71561	0.0381617	1.41837	976.470763747173	669.361646355785	659.67078447631	1.95152	6.91855e-05	4.15998
tbx3a	ENSDARG00000002216	556870	both	537.295	636	651.251	1.08749	0.0201816	1.69505	534.386985135269	634.539364175426	655.818692304186	1.08937	0.016581	1.78039
tcf15	ENSDARG00000067544	30159	both	324.514	195.543	183.736	3.08004	6.57735e-07	6.18195	367.269600692967	194.424408840336	182.01135513288	3.17642	1.00278e-06	5.9988
tcf7l1b	ENSDARG00000007369	30556	both	2229.82	1617.59	827.291	1.55745	0.00459418	2.33779	2218.19179466149	1607.62869399323	825.310747877661	1.57789	0.0033394	2.47633
tcima	ENSDARG00000079497	541345	both	8117.72	10733.6	4175.9	2.73396	9.56452e-08	7.01934	8075.07315174403	10708.8190560764	4205.52162891685	2.73272	6.27068e-08	7.20269
TCIMoneOfMany	ENSDARG00000076858	558746	both	151.57	238.137	137.561	1.61226	0.0244538	1.61165	150.599968538121	238.919547181906	138.67531819648	1.61518	0.0221801	1.65404
tead1a	ENSDARG00000028159	405773	Ens95	148.655	124.877	44.2505	1.83334	0.0426715	1.36986	166.145771742056	148.961984882646	47.1881291085244	1.72537	0.0575627	1.23986
tek	ENSDARG00000028663	30747	both	3918.46	5233.21	2908.02	6.47531	4.1576e-37	36.3812	3947.66240109927	5241.72075376011	2938.18330428791	6.27264	9.85416e-33	32.0064
tes	ENSDARG00000051857	403032	both	874.44	1222.63	815.748	2.22454	6.41416e-06	5.19286	869.593366720119	1219.74716192868	821.458655705536	2.22598	4.59346e-06	5.33786
tfe3a	ENSDARG00000098903	114834	both	671.375	1056.13	622.392	1.09132	0.0444838	1.3518	748.141779189376	1141.39702702287	656.781715347217	1.06269	0.0347721	1.45877
tfpia	ENSDARG00000034718	359833	both	1633.26	1204.24	951.385	1.45587	0.0155253	1.80896	1594.41644110359	1191.69587906117	952.429789557767	1.44984	0.0138689	1.85796
tg	ENSDARG00000020084	567631	both	1064.87	2833.44	2506.88	2.59679	0.000864348	3.06331	513.011505729858	1739.1795377857	1908.71167128766	2.43966	0.00311187	2.50698
tgfb1b	ENSDARG00000034895	563884	both	69.9552	148.11	142.371	3.68151	8.55305e-07	6.06788	69.9561144177079	164.438554740583	177.196239917724	2.50118	0.00111423	2.95302
tgfbr2a	ENSDARG00000059363	100334928	both	110.762	152.95	74.0714	2.19714	0.00650716	2.18661	140.883841535662	166.373125972825	84.7460277867376	1.90491	0.0134624	1.87088
tgfbr2b	ENSDARG00000034541	30739	both	1557.47	1997.06	2062.46	1.84841	3.11654e-06	5.50633	1549.72225689228	1992.60836920942	2077.2407038181	1.85555	1.69642e-06	5.77047
tgm1l1	ENSDARG00000102106	566581	both	2098.66	2165.5	1217.85	2.19418	5.65137e-07	6.24785	541.18827403699	635.506649791547	171.418101659537	2.24398	0.000914893	3.03863
tgm1l2	ENSDARG00000101595	793096	Ens95	2909.94	509.187	291.476	2.46073	0.0088195	2.05456	2044.27312131746	102.532275308834	16.3713917315289	4.03753	0.0992238	1.00338
tgm1l4	ENSDARG00000101407	555962	both	1021.15	69.6986	16.3534	3.18036	0.0282904	1.54836	1015.33527175701	85.1211342186547	19.2604608606222	3.04472	0.0276242	1.55871
tgm2b	ENSDARG00000074094	323856	both	5178.63	3649.5	1568.97	2.85232	1.57284e-06	5.80331	5144.68924780227	3626.35377483792	1580.32081361405	2.86162	1.29377e-06	5.88814
thoc1	ENSDARG00000088246	373077	RefSeq	965.77	933.187	666.643	0.911848	0.0520406	1.28366	1261.15328491923	1127.85502839718	807.01331006007	1.00385	0.0236596	1.62599
thpo	ENSDARG00000079158	100189608	RefSeq	0	22.2648	32.7069	3.50293	0.235284	0.628408	28.1767683071324	40.6259958770852	46.2251060654933	2.80381	0.0382502	1.41737
tie1	ENSDARG00000004105	30746	both	15922.6	18005.5	8986.69	6.85567	2.19886e-29	28.6578	14454.6821415589	16810.4567225682	8672.98552553817	7.16367	3.88498e-25	24.4106
timd4	ENSDARG00000077257	100142639	both	1050.3	1060.97	235.682	2.57178	0.000551736	3.25827	1022.13656065873	1017.58446815937	230.162507284435	2.54857	0.000684279	3.16477
timp2b	ENSDARG00000075261	406650	both	2450.37	3681.44	1270.76	2.87045	1.55023e-05	4.8096	2148.23568024378	3379.69594272704	1248.07786376832	2.8732	3.65026e-05	4.43768
timp4.1	ENSDARG00000111805	101882922	RefSeq	30.1196	23.2329	38.4787	1.81168	0.139111	0.856639	1232.9765166121	1314.54115230854	1004.43303388145	3.79727	2.5406e-12	11.5951
tiparp	ENSDARG00000061841	563506	both	2607.77	2317.48	2849.34	1.46842	0.000287203	3.54181	2301.75048688264	2111.58449999231	2734.02241916532	1.42864	0.000325843	3.48699
tjp1a	ENSDARG00000077506	378845	both	8546.19	9963.03	5312.94	1.94315	1.15034e-05	4.93917	8500.63951445176	9930.15413509897	5349.59300403781	1.945	6.87875e-06	5.16249
tjp2b	ENSDARG00000023443	103911473	both	2570.85	1821.84	1667.09	2.12122	3.59231e-07	6.44463	4782.27771061053	4081.94530003094	2925.66400472851	2.73401	1.51822e-11	10.8187
tll1	ENSDARG00000037429	474335	both	280.792	436.584	184.698	3.08083	7.61215e-07	6.11849	279.824457670832	435.278527254484	186.826470348035	3.08075	6.99545e-07	6.15518
tln1	ENSDARG00000100729	494453	both	6056.95	5284.51	4149.92	2.1088	9.60502e-08	7.0175	6033.71486852731	5281.37946402108	4178.55698371198	2.10884	4.39822e-08	7.35672
tlnrd1	ENSDARG00000079017	100003148	both	209.866	210.064	127.942	1.61121	0.0130306	1.88504	208.896730552878	209.900978698274	129.045087766169	1.61122	0.0116252	1.9346
tlr3	ENSDARG00000016065	403126	both	297.31	175.215	138.523	1.54706	0.0201343	1.69606	296.341873575013	175.078696517915	139.638341239511	1.54728	0.0179695	1.74546
tlr5b	ENSDARG00000052322	403139	both	864.724	798.63	571.408	2.13157	2.22072e-05	4.65351	183.634800346483	162.503983508341	332.242949845733	1.62557	0.0130979	1.8828
tm4sf18	ENSDARG00000060668	563601	both	1023.09	1694.06	792.66	4.26665	1.68491e-11	10.7734	1017.2784971575	1690.81525697964	798.34610267279	4.27295	2.42983e-11	10.6144
tm6sf2	ENSDARG00000029057	791179	both	136.996	719.251	915.792	2.1483	0.00832316	2.07971	68.012889017216	549.418229956771	752.120996607296	2.44452	0.00888472	2.05136
tmcc3	ENSDARG00000045525	556763	Ens95	1232.96	949.644	673.377	1.83284	3.41603e-05	4.46648	76.7574033194295	114.139702702287	25.0385991188088	1.2441	0.301862	0.520191
tmem108	ENSDARG00000090230	563089	both	4671.45	4289.37	2956.12	4.39849	3.7939e-23	22.4209	7976.94026901919	8548.87027527808	4896.00915077016	4.15016	1.37653e-21	20.8612
tmem127	ENSDARG00000030981	553545	both	448.879	716.347	171.23	2.35806	0.000803388	3.09507	445.970229412888	714.824070313476	179.122286003786	2.36198	0.000597602	3.22359
tmem14ca	ENSDARG00000110836	751728	both	612.108	653.425	411.722	1.41228	0.00592188	2.22754	617.94567735642	658.721504578453	413.136885460346	1.4255	0.00435817	2.3607
tmem176l.1	ENSDARG00000099491	100330405	both	1911.14	2693.08	2030.71	1.81038	0.000423031	3.37363	1892.7015400791	2675.5120141909	2006.94002167683	1.86592	0.000219829	3.65792
tmem189	ENSDARG00000042732	450031	both	2109.34	2316.51	1731.54	1.22935	0.000988656	3.00495	1264.06812301997	1364.84000434684	799.309125715821	1.6597	0.000315363	3.50119
tmem204	ENSDARG00000045273	751647	both	317.713	503.379	185.66	2.09003	0.00264329	2.57786	120.479974830497	239.886832798027	100.154396475235	1.86999	0.0288396	1.54001
tmem258	ENSDARG00000078785	393742	RefSeq	2912.86	2650.48	1285.19	1.23491	0.0588457	1.23029	2898.32068483365	2654.23173063623	1307.78529243625	1.22932	0.0496164	1.30437
tmem26a	ENSDARG00000077979	794507	both	83.5576	76.4749	50.9842	2.67907	0.00131406	2.88139	73.8425652186917	58.0371369672646	49.1141751945866	2.37519	0.00654503	2.18409
tmem51a	ENSDARG00000068575	777622	both	581.988	992.237	443.467	1.42836	0.0276123	1.5589	579.081169346582	986.631328443498	446.842691966435	1.43213	0.0236413	1.62633
tmem56a	ENSDARG00000098451	571836	Ens95	333.259	363.982	312.639	1.22305	0.0217386	1.66277	1041.56881466365	1064.01417773318	1133.47812164762	0.549546	0.231401	0.635634
tmem88a	ENSDARG00000056920	402969	both	2302.69	2309.73	2220.22	5.70914	3.17861e-28	27.4978	2290.09113447969	2288.59776774247	2213.02695288549	6.177	3.70313e-39	38.4314
tmem88b	ENSDARG00000069388	100004517	Ens95	4798.73	4652.38	2851.27	4.92476	5.62469e-14	13.2499						#NUM!
tmsb4x	ENSDARG00000077777	793949	both	162180	190054	77438.3	2.354	0.000347641	3.45887	161479.115942775	189703.087748049	78021.2378772514	2.35312	0.000291953	3.53469
tmtc2a	ENSDARG00000045753	564667	Ens95	343.946	787.014	736.866	1.58201	0.00358793	2.44516	127.281263732219	216.671978011121	324.538765501484	1.3103	0.0900265	1.04563
tnfaip2b	ENSDARG00000058160	569366	both	3318.98	7217.68	1089.91	7.74254	2.03952e-15	14.6905	3301.53995543572	7199.50684078917	1103.62440731365	7.64069	3.52485e-17	16.4529
tnfaip3	ENSDARG00000027777	564497	both	186.547	283.635	251.073	1.3447	0.0322469	1.49151	339.092832385834	504.923091615202	490.178728902835	1.32385	0.0151963	1.81826
tnfaip8l1	ENSDARG00000086457	393303	both	715.097	553.717	809.014	1.95981	0.000460135	3.33711	711.22049658003	552.320086805135	803.161217887945	1.98418	0.00031063	3.50776
tnfaip8l2a	ENSDARG00000075592	723996	both	335.202	211.032	505.994	1.39344	0.0426604	1.36997	334.234768884604	209.900978698274	510.402212806488	1.39316	0.0377092	1.42355
tnfrsf1a	ENSDARG00000018569	406471	both	863.752	1097.75	425.189	1.3532	0.0324665	1.48856	785.063061798722	1028.2246099367	419.878046761564	1.35346	0.0246088	1.60891
tnfrsf1b	ENSDARG00000070165	100037357	both	328.401	311.708	167.382	2.3903	0.0002041	3.69016	373.099276894442	374.339533438857	173.3441477456	2.40925	0.000118074	3.92784
tnfrsf9a	ENSDARG00000060498	678622	both	507.175	502.411	317.449	3.24117	1.4641e-10	9.83443	578.109556646336	593.913368298341	457.435945439777	2.8902	1.48935e-12	11.827
tnfsf18	ENSDARG00000111698	100148577	Ens95	231.241	107.452	55.7941	2.3289	0.0112063	1.95054	29.1483810073783	10.6401417773318	7.70418434424888	2.6142	1	0
tnnt2a	ENSDARG00000020610	58071	both	416.816	296.219	147.181	2.31385	0.00798361	2.0978	414.878623005018	295.022112916928	148.305548626791	2.31051	0.00843115	2.07411
tns1b	ENSDARG00000020845	555362	both	6972.2	7215.74	3329.37	2.31599	1.55847e-05	4.8073	7547.48745551049	7696.69164747541	3594.96501963513	2.31713	1.02318e-05	4.99005
tns2a	ENSDARG00000076292	799109	both	1074.59	790.886	379.015	1.85374	0.00463317	2.33412	6782.82826041693	4655.54567039074	3233.83137849847	1.34386	0.00812241	2.09031
tns3.2	ENSDARG00000031911	571402	RefSeq	295.366	385.279	843.645	1.31554	0.0828033	1.08195	913.315938231187	1197.49959275789	1480.16641713882	1.39906	0.00367154	2.43515
tomm40	ENSDARG00000092112	322645	both	2092.83	2678.56	1848.9	1.43527	0.000855526	3.06777	2196.81631525608	2777.07700388361	1917.37887867494	1.41389	0.000681186	3.16673
tor1	ENSDARG00000077950	565062	both	720.927	852.84	778.231	1.07889	0.00836307	2.07763	717.050172781506	851.211342186547	783.900757027323	1.08026	0.00611414	2.21366
tor4aa	ENSDARG00000010145	101886311	Ens95	241.928	303.963	332.84	1.08363	0.0365775	1.43679						#NUM!
tox2	ENSDARG00000100055	405844	both	2641.78	2217.77	1187.07	1.93878	5.68357e-05	4.24538	2612.66655096134	2220.88777461399	1196.07461944464	1.94196	3.78205e-05	4.42227
tp53i11b	ENSDARG00000006025	556618	both	674.29	699.89	615.659	1.01818	0.0266619	1.57411	670.412763169701	694.511072374933	602.852424937475	1.0381	0.0206724	1.68461
tpcn3	ENSDARG00000078959	557460	both	535.351	817.023	470.402	2.0866	6.61899e-05	4.17921	532.443759734777	815.421774390068	473.807337171306	2.08931	5.11499e-05	4.29116
tpd52l1	ENSDARG00000042548	553769	Ens95	167.115	365.918	107.74	1.58168	0.0497724	1.30301	166.145771742056	365.633962893767	108.821603862515	1.54235	0.0521851	1.28245
tpgs2	ENSDARG00000011926	431755	both	268.162	300.091	219.328	1.86129	0.00116033	2.93542	265.250267167143	290.185684836323	220.532276854124	1.83973	0.00117568	2.92971
tpm3	ENSDARG00000005162	373076	both	4824.96	7821.73	7221.48	1.09552	0.0170129	1.76922	4647.22354527635	7683.14964884971	7068.58913584834	1.10497	0.0148471	1.82836
tpm4a	ENSDARG00000023963	406437	both	7209.27	11145	8203.65	2.31956	5.36276e-07	6.27061	7139.41012140719	11114.1117292312	8234.81004095902	2.33489	2.98452e-07	6.52513
tpst2	ENSDARG00000099155	393391	both	325.486	72.6027	243.378	1.81024	0.0286993	1.54213	323.547029181899	72.5464212090807	245.570875972933	1.80304	0.0267213	1.57314
tpt1	ENSDARG00000092693	30723	both	110002	96238.3	79518.1	1.24218	0.0239419	1.62084	109413.306174696	95990.5226870073	80018.5476684979	1.24418	0.0192411	1.71577
tpte	ENSDARG00000056985	327292	both	462.481	867.361	876.352	2.45631	1.54221e-07	6.81186	416.82184840551	865.720626428364	883.092130459527	2.44361	6.54712e-07	6.18395
tradd	ENSDARG00000036057	58130	both	694.694	586.63	290.514	2.14905	0.000144336	3.84062	690.816629874866	585.207797753251	291.795982038426	2.14559	0.000123886	3.90698
traf6	ENSDARG00000028058	554561	Ens95	483.857	708.603	446.352	1.23051	0.016644	1.77874	20.4038667051648	57.0698513511435	52.0032443236799	1.25417	0.351141	0.454519
trafd1	ENSDARG00000075123	100037363	both	909.417	960.292	585.838	1.36366	0.00237757	2.62387	904.571423928973	956.645474343745	590.33312537807	1.37165	0.00166622	2.77827
trak1a	ENSDARG00000041304	100002689	both	1836.32	1525.63	882.123	1.21185	0.0233557	1.63161	1846.06413046729	1534.11498716803	903.315614363181	1.19203	0.020355	1.69133
tram1	ENSDARG00000019137	266757	both	1823.69	1716.33	1828.7	1.05384	0.00890105	2.05056	1814.00091135918	1698.55354190861	1820.1135513288	1.05348	0.00637183	2.19574
trib3	ENSDARG00000016200	405805	both	8665.7	8999.83	6172.94	1.58932	0.00825751	2.08315	8619.17626388176	8978.34508883583	6217.27676580884	1.59022	0.00668223	2.17508
trim35-10	ENSDARG00000033071	799678	both	107.848	121.973	15.3915	3.39592	0.0256758	1.59048	106.877397027054	151.863841731009	17.33441477456	3.19739	0.040102	1.39683
trim35-31	ENSDARG00000052097	560122	both	137.967	401.735	70.2236	3.74509	4.11082e-05	4.38607	137.969003434924	400.456245074126	70.300682141271	3.74211	4.55941e-05	4.34109
trim3a	ENSDARG00000063711	562489	Ens95	720.927	938.995	760.916	1.39245	0.00283696	2.54715	63.1548255159863	97.6958472282287	56.8183595388355	0.892436	0.32688	0.485612
trim69	ENSDARG00000060688	101883816	both	239.985	181.023	149.105	2.19869	0.0145824	1.83617	296.341873575013	250.526974575359	159.861825143164	2.15161	0.00561097	2.25096
trim8a	ENSDARG00000090512	101180910	both	1555.53	1988.35	893.667	1.8499	8.77572e-05	4.05672	1519.60226318466	1940.37494593888	881.166084373465	1.81934	8.48736e-05	4.07123
trip10a	ENSDARG00000005679	492762	both	678.177	824.767	616.621	1.08488	0.0141136	1.85036	513.011505729858	755.450066190561	582.628941033821	1.13267	0.010758	1.96827
trpm4a	ENSDARG00000059993	100004946	both	1128.03	1578.87	669.529	2.41544	6.80273e-06	5.16732	829.757246010035	1263.27501465413	580.702894947759	2.33657	7.79838e-06	5.108
trpm6	ENSDARG00000103454	100149353	both	179.746	322.356	221.252	1.53331	0.00907302	2.04225	178.776736845254	327.909823865045	228.236461198373	1.31008	0.0358597	1.44539
trpv4	ENSDARG00000061941	557850	both	187.519	137.461	154.877	1.9413	0.000864312	3.06333	357.553473690507	291.152970452444	433.360369363999	1.99152	1.88035e-05	4.72576
tsg101b	ENSDARG00000011897	100333057	Ens95	481.913	836.383	154.877	1.82738	0.0228596	1.64093	63.1548255159863	53.2007088866592	27.9276682479022	1.93275	0.0604286	1.21876
tshz3a	ENSDARG00000087394	558522	RefSeq	186.547	116.164	374.205	0.987909	0.293414	0.532519	767.574033194295	498.152092302354	651.00357708903	1.16268	0.00690542	2.16081
tspan14	ENSDARG00000055938	751700	RefSeq	172.945	181.991	156.801	1.30105	0.194975	0.710021	3049.89226607202	2649.39530255563	1496.53780887034	1.82331	4.45573e-05	4.35108
tspan18a	ENSDARG00000056656	437007	both	1265.99	1043.54	940.803	1.51488	0.000925823	3.03347	1259.21005951874	1044.66846541076	947.614674342612	1.51651	0.000713468	3.14663
tspan18b	ENSDARG00000015015	436712	both	2263.83	2571.1	2482.84	1.5139	7.65044e-06	5.11631	2261.91436617256	2572.01245326594	2502.89688883785	1.51381	3.71594e-06	5.42993
tspan4b	ENSDARG00000070391	556934	both	6028.78	9679.4	6674.12	3.21538	4.40257e-12	11.3563	5995.82197321772	9656.41230573671	6721.90084035714	3.2169	2.39481e-12	11.6207
tspan5a	ENSDARG00000086033	450026	both	705.381	830.575	396.33	1.97527	0.000264905	3.57691	701.504369577571	836.702057944731	398.691539814879	1.97311	0.000232849	3.63293
tspan5b	ENSDARG00000070449	494048	both	778.251	713.443	181.812	2.23519	0.00134014	2.87285	774.375322096017	711.922213465112	183.937401218942	2.23646	0.0011481	2.94002
TTC28	ENSDARG00000114920	100331958	RefSeq	392.526	287.507	272.237	0.920867	0.111812	0.95151	1472.96485357285	935.365190789081	695.302637068461	1.22197	0.0137327	1.86225
ttc9c	ENSDARG00000007025	393235	both	332.287	267.178	207.785	1.11486	0.0440428	1.35613	330.348318083621	266.003544433296	208.976000337751	1.11527	0.0374696	1.42632
tuba1b	ENSDARG00000045367	373080	Ens95	2695.22	2452.04	2234.65	1.0014	0.0120006	1.9208	2682.62266537905	2452.06903686693	2258.28903590795	0.999143	0.00860975	2.06501
tuba4l	ENSDARG00000074289	327377	both	315.77	257.498	212.595	1.12859	0.0334222	1.47596	218.612857555337	223.442977323969	206.086931208657	1.34764	0.0140429	1.85254
tuba8l	ENSDARG00000042708	337223	both	15338.6	16489.5	17072	1.3874	0.000443447	3.35316	15256.2626192618	16451.5937589873	17195.7394563635	1.38946	0.000284135	3.54648
tuba8l3	ENSDARG00000070155	445164	both	3877.65	5066.7	4155.7	1.62111	7.79451e-05	4.10821	3725.16309274295	4982.48820863967	4138.11001590468	1.62942	4.20698e-05	4.37603
twf1a	ENSDARG00000115712	325677	RefSeq	64.1256	97.7717	267.427	0.879413	0.41063	0.386549	1226.17522771038	1104.64017361027	1122.88486817427	1.23754	0.0134695	1.87065
txnrd3	ENSDARG00000100374	352924	Ens95	1540.96	1824.75	2210.6	1.01329	0.032291	1.49092	1420.49776775957	1744.98325148242	2179.3211463794	0.992742	0.0335317	1.47454
tyk2	ENSDARG00000020326	100536675	Ens95	363.378	574.046	631.05	1.49427	0.00552073	2.258	71.8993398181998	109.303274621682	31.7797604200266	1.20997	0.241201	0.61762
tyrobp	ENSDARG00000094894	100101461	both	68.012	87.1233	67.3377	2.03629	0.00970262	2.01311	88.4167557223808	90.9248479153812	72.2267282273332	1.99871	0.010071	1.99693
uacaa	ENSDARG00000069250	565006	RefSeq	81.6144	151.014	32.7069	0.775359	0.533094	0.273196	334.234768884604	575.534941592041	281.202728565084	1.70184	0.00137566	2.86149
uba52	ENSDARG00000041435	641289	both	86583.1	65904.9	31973.8	1.51962	0.0298339	1.52529	85792.4298190165	65511.3529230322	32132.226853776	1.51603	0.0254691	1.59399
ubald1b	ENSDARG00000020976	553697	both	969.657	1073.55	331.878	1.57568	0.0206568	1.68494	242.903175061486	343.386393722982	43.3360369363999	2.96755	0.00420794	2.37593
ubap1	ENSDARG00000058746	393183	RefSeq	875.411	1055.16	605.077	1.04243	0.0641229	1.19299	735.510814086179	854.113199034911	477.65942934343	1.18105	0.021513	1.6673
ubap1la	ENSDARG00000089217	100004590	RefSeq	120.478	145.205	169.306	0.95279	0.132678	0.8772	205.98189245214	182.816981446883	195.493677735315	1.23067	0.017015	1.76917
ubash3ba	ENSDARG00000061243	558545	RefSeq	29.148	23.2329	26.9351	1.14701	0.42752	0.369044	492.607639024693	635.506649791547	550.849180613795	1.02753	0.0257952	1.58846
ubash3bb	ENSDARG00000077399	569827	both	95.2168	144.237	133.713	1.82246	0.0116955	1.93198	262.335429066405	275.676400594507	231.125530327466	2.28517	1.72123e-05	4.76416
UBB	ENSDARG00000093313	550134	Ens95	43938.7	11709.4	31504.4	2.06949	0.00962972	2.01639	37406.1173467686	7842.75177550969	33938.8580825024	1.30084	0.168918	0.772324
ubc	ENSDARG00000102632	777766	both	56194.4	40868.6	28615.6	1.40363	0.00183204	2.73706	56016.3870072794	40827.1912852384	28849.2813000829	1.40358	0.00128504	2.89108
ube2a	ENSDARG00000098466	797853	both	2168.61	2085.15	1544.92	1.13294	0.00576186	2.23944	2207.50405495878	2156.07963833388	1705.51380920809	1.0898	0.00370389	2.43134
uck2a	ENSDARG00000006074	100005763	both	1625.49	1284.58	1660.35	1.42903	0.00157044	2.80398	1616.76353320925	1281.65344136043	1672.77102574504	1.43087	0.00120921	2.9175
ucp2	ENSDARG00000043154	555812	both	7171.38	6721.08	4493.35	1.29204	0.00376808	2.42388	6713.84375869947	6186.75880071041	4331.67764755393	1.2927	0.00197955	2.70343
ufd1l	ENSDARG00000010051	436724	both	1294.17	866.393	737.828	1.1099	0.0217622	1.6623	1287.38682782587	862.81876958	742.490766176985	1.12915	0.0149859	1.82432
ugt1b5	ENSDARG00000089507	100384899	both	2172.5	3199.36	2614.63	2.37599	2.25825e-10	9.64623	151.571581238367	446.885954647937	1199.92671161676	2.00493	0.0288125	1.54042
ugt5b1	ENSDARG00000104995	100415791	both	190.434	223.616	220.29	1.69052	0.000880958	3.05504	400.304432501329	442.049526567332	328.390857673608	1.9185	6.72744e-05	4.17215
ugt5b2	ENSDARG00000101495	100415799	both	846.263	963.196	645.48	2.01647	1.62518e-05	4.7891	310.916064078702	604.553510075673	546.034065398639	1.83573	0.000370961	3.43067
ugt5b4	ENSDARG00000091916	791210	both	241.928	284.603	110.626	1.871	0.00711325	2.14793	246.78962586247	287.28382798796	109.784626905546	1.85449	0.00816013	2.0883
ugt5e1	ENSDARG00000058048	100002993	RefSeq	0	0	21.1633	4.34572	1	0	264.278654466897	395.61981699352	168.529032530444	1.28108	0.034832	1.45802
unc13d	ENSDARG00000078249	564076	both	616.966	177.151	569.484	3.23183	5.14408e-06	5.28869	614.059226555436	176.045982134036	572.99871060351	3.20277	4.09613e-06	5.38763
ushbp1	ENSDARG00000089071	100148935	both	5521.6	5148.99	1847.94	6.27506	2.91411e-24	23.5355	622.80374085765	460.427953273632	689.524498810274	5.62821	2.08559e-27	26.6808
usp6nl	ENSDARG00000022187	561983	both	1713.9	1573.06	854.226	1.66391	0.000465185	3.33237	1745.98802234196	1568.93726934839	900.426545234087	1.63488	0.000341897	3.4661
vamp3	ENSDARG00000070161	415163	both	3535.65	2983.49	2790.67	1.52023	0.000434954	3.36156	3471.57217797876	2944.41741547256	2802.39705522053	1.5427	0.000307545	3.51209
vamp5	ENSDARG00000068262	325484	both	2284.23	2263.27	1337.13	1.92732	0.000177993	3.7496	2257.05630267133	2256.67734241047	1283.70971636047	1.96377	0.000175492	3.75574
vangl1	ENSDARG00000004305	403076	RefSeq	67.0404	60.0183	77.9193	0.690999	0.559948	0.251852	1050.31332896586	1271.01329958309	807.976333103101	1.48244	0.0116388	1.93409
vat1	ENSDARG00000056481	368752	both	14393.3	15515.7	7168.57	2.67295	1.20661e-07	6.91843	14316.713138124	15480.4390004017	7220.74677664726	2.67218	7.36595e-08	7.13277
vav2	ENSDARG00000044718	556413	both	2615.55	2016.42	1254.4	1.86758	4.44888e-05	4.35175	2577.68849375249	1954.8842301807	1260.59716332772	1.88942	1.92795e-05	4.7149
vcam1b	ENSDARG00000062479	561971	both	1041.55	667.945	778.231	1.48292	0.00122662	2.91129	969.669474845451	597.782510762825	691.450544896337	1.56544	0.000602391	3.22012
vdrb	ENSDARG00000070721	564511	both	2451.35	1989.31	478.097	2.00492	0.00537708	2.26945	2852.65488792209	2389.19547181906	660.633807519341	1.74651	0.00882695	2.05419
vegfc	ENSDARG00000069640	403049	both	1178.55	868.329	453.086	2.75731	2.87465e-06	5.54142	1657.57126661958	1239.0928742511	630.780093185377	2.74953	9.34767e-07	6.0293
vhll	ENSDARG00000078613	795635	both	205.979	249.753	75.0334	1.89998	0.0404849	1.39271	205.010279751894	249.559688959238	75.1157973564265	1.89738	0.037886	1.42152
vps25	ENSDARG00000059079	407684	Ens95	810.314	1131.63	600.267	1.40346	0.00934415	2.02946	64.1264382162322	43.5278527254484	30.8167373769955	2.03061	0.0587799	1.23077
vps28	ENSDARG00000103203	393562	both	1904.34	1937.04	983.13	1.148	0.0322919	1.49091	1893.67315277934	1932.63666100991	989.98768823598	1.14742	0.0259477	1.5859
vps39	ENSDARG00000074471	567078	both	549.925	761.845	512.728	1.03295	0.0334277	1.47589	471.232159619282	760.286494271166	498.845936290115	1.0571	0.0322972	1.49083
vsir	ENSDARG00000068784	570830	both	559.641	774.429	1286.15	1.72118	0.0237938	1.62354	556.734077240925	772.86120728074	1296.22901591987	1.7261	0.0211211	1.67528
vtg3	ENSDARG00000016448	30518	both	234.156	83.2511	77.9193	2.91683	0.00069833	3.15594	229.300597258043	76.415563673565	67.4116130121777	3.03374	0.00123816	2.90722
vtna	ENSDARG00000055388	553699	RefSeq	30.1196	17.4247	48.0983	1.0109	0.504097	0.297486	75.7857906191836	64.8081362801121	82.8199817006754	1.78414	0.0403246	1.39443
vwa1	ENSDARG00000075468	568379	both	3169.36	6212.86	2258.7	2.95091	6.97403e-08	7.15652	2772.01103380168	5858.84897684536	2145.61533987331	3.0536	5.64655e-08	7.24822
vwf	ENSDARG00000077231	570643	both	10362.1	8131.51	5048.4	6.96951	3.18068e-43	42.4975	10319.4984893122	8115.52631925583	5083.79864416123	6.81947	2.74735e-42	41.5611
wasa	ENSDARG00000015149	571256	both	345.89	261.37	393.444	1.70711	0.0444076	1.35254	435.282489710183	318.236967703834	447.805715009466	1.73619	0.0258524	1.5875
wasb	ENSDARG00000026350	335158	both	380.867	175.215	645.48	2.4459	0.00388602	2.4105	378.928953095918	175.078696517915	650.040554045999	2.45552	0.00357409	2.44683
wasf2	ENSDARG00000024209	394056	both	1405.9	1573.06	1189.95	1.39758	0.00582216	2.23492	1398.15067565391	1573.77369742899	1198.96368857373	1.39583	0.00442716	2.35387
wasf3b	ENSDARG00000062948	563632	both	3626.98	4288.4	2537.67	2.03617	3.51014e-07	6.45468	3587.19408930802	4278.30428010352	2555.86315620456	2.0345	1.72106e-07	6.7642
wipf1a	ENSDARG00000104300	100005341	both	636.398	296.219	716.665	2.66547	0.00150197	2.82334	633.491480560355	295.022112916928	722.267282273332	2.66678	0.00147097	2.8324
wu:fi04e12	ENSDARG00000076673	327364	RefSeq	91.3304	140.365	95.2347	0.247828	0.846212	0.0725206	651.952121865028	726.431497706929	569.146618431386	1.07756	0.0077527	2.11055
wwc3	ENSDARG00000061654	566492	both	861.809	1218.76	808.052	2.56991	1.05651e-07	6.97612	1334.99585013793	1656.9602604154	957.244904772923	2.78121	1.95384e-09	8.70911
wwtr1	ENSDARG00000067719	568008	both	224.44	234.265	77.9193	2.44025	0.00136865	2.86371	6781.85664771668	6251.56693699052	3619.04059571091	2.07529	1.41498e-05	4.84925
xirp2a	ENSDARG00000071113	559746	both	1404.93	1379.45	787.851	2.03117	8.1903e-06	5.0867	455.686356415347	404.32538753861	284.091797694177	1.29523	0.0263584	1.57908
xpo6	ENSDARG00000041217	333980	both	981.316	914.794	944.651	1.10688	0.00448937	2.34782	975.499151046927	912.150336002175	951.466766514736	1.10723	0.00307388	2.51231
yif1b	ENSDARG00000040505	492462	both	800.598	924.475	408.836	1.60958	0.00180913	2.74253	141.855454235908	188.62069514361	102.080442561298	1.93353	0.00338874	2.46996
ypel1	ENSDARG00000035630	554488	RefSeq	25.2616	83.2511	33.6688	0.568734	0.722881	0.140933	1220.3455515089	1304.86829614733	739.601697047892	1.42946	0.00156888	2.80441
yrk	ENSDARG00000004378	337571	both	8800.75	8816.88	4910.84	5.6101	4.90814e-19	18.3091	8663.87044809308	8669.78097729321	4877.71171295257	5.65789	6.96286e-18	17.1572
ywhaba	ENSDARG00000013078	323055	both	13299.3	14299.8	10388.3	1.13978	0.0211908	1.67385	3871.87661048008	4103.22558358561	3638.30105657153	1.31903	0.000575699	3.2398
zbtb2a	ENSDARG00000044038	393129	both	423.617	321.388	287.628	2.38474	0.000404589	3.39299	421.679911906739	323.07339578444	293.722028124488	2.3654	0.000257256	3.58964
zbtb2b	ENSDARG00000028086	406724	both	1569.13	1580.8	1705.57	1.23306	0.00240782	2.61838	1558.46677119449	1565.0681268839	1701.66171703597	1.24523	0.001623	2.78968
zbtb8os	ENSDARG00000016368	550382	both	1619.66	1301.04	926.374	1.54757	0.00640375	2.19357	1610.93385700777	1298.09729683448	933.169328697145	1.55342	0.00495994	2.30452
zcchc14	ENSDARG00000101242	796219	RefSeq	306.054	222.648	187.583	1.22113	0.0610349	1.21442	596.570197951009	414.965529315942	329.353880716639	1.34739	0.0246353	1.60844
zfand5b	ENSDARG00000002271	393923	RefSeq	6584.53	3879.89	4774.24	1.13052	0.0541183	1.26666	6331.99996750281	3706.63848097597	4704.36756520697	1.13154	0.0472418	1.32567
zfp36l2	ENSDARG00000021806	333941	both	6448.51	7367.73	5498.6	1.63264	9.80825e-06	5.00841	6414.58704702372	7350.40339690406	5538.34552047191	1.63346	4.6673e-06	5.33093
zfpm1	ENSDARG00000041572	407655	both	480.942	257.498	380.939	2.19075	4.7049e-05	4.32745	361.439924491491	247.625117726996	206.086931208657	2.45001	2.18405e-06	5.66074
zgc:100829	ENSDARG00000015557	445149	both	3082.89	2517.86	1554.54	2.39859	1.48112e-06	5.82941	1556.523545794	1360.00357626623	1305.85924635018	1.87091	2.14106e-05	4.66937
zgc:110182	ENSDARG00000040280	550535	both	2262.86	2227.45	1564.16	5.08684	4.05303e-25	24.3922	2250.2550137696	2221.85506023011	1571.65360622677	5.092	1.30706e-25	24.8837
zgc:110425	ENSDARG00000058479	553782	both	377.952	398.831	137.561	1.93495	0.00466119	2.3315	376.01411499518	397.554388225762	138.67531819648	1.93186	0.00418702	2.3781
zgc:110591	ENSDARG00000056233	402849	both	772.422	966.1	635.86	1.56028	0.00517889	2.28576	713.163721980522	960.514616808229	640.410323615688	1.53383	0.00537701	2.26946
zgc:110626	ENSDARG00000053159	550588	both	1197.01	1910.9	1718.07	1.73441	0.000131721	3.88034	951.208833540778	1598.92312344814	1671.80800270201	1.66104	0.000375993	3.42482
zgc:112332	ENSDARG00000058966	553712	both	5778.1	6788.84	2813.75	3.09678	3.85791e-06	5.41365	5762.63492515869	6810.6580231085	3000.77980208494	2.6575	4.86851e-06	5.3126
zgc:113184	ENSDARG00000098181	553745	both	152.541	181.023	408.836	1.59926	0.017822	1.74904	444.027004012396	472.035380667085	520.99546627983	1.96165	4.23244e-07	6.37341
zgc:113363	ENSDARG00000101206	791449	both	1565.25	2312.64	527.158	5.24537	5.62469e-14	13.2499	1702.26545083089	2458.84003617978	600.926378851412	5.00694	2.30012e-14	13.6382
zgc:113411	ENSDARG00000038133	550611	both	81.6144	136.493	140.447	2.2651	0.000723924	3.14031	91.3315938231187	137.354557489193	141.564387325573	2.25621	0.000471911	3.32614
zgc:136439	ENSDARG00000009267	678627	both	388.64	349.461	178.926	1.70182	0.00321231	2.49318	356.581860990261	326.942538248924	175.270193831662	1.66295	0.00334258	2.47592
zgc:153184	ENSDARG00000099645	751652	both	371.151	405.607	172.192	2.50872	7.46412e-05	4.12702	339.092832385834	348.222821803588	155.046709928009	2.99512	2.06785e-06	5.68448
zgc:153311	ENSDARG00000015964	751666	both	1638.12	2392.02	1069.71	6.71828	9.65198e-27	26.0154	1647.85513961712	2415.31218345433	1088.21603862515	6.49372	1.85752e-23	22.7311
zgc:153867	ENSDARG00000033738	337226	both	20456.1	23390.7	13593.5	2.01115	2.50496e-05	4.6012	20346.5415558503	23327.0599183759	13654.7037271381	2.01295	1.72713e-05	4.76268
zgc:154055	ENSDARG00000103924	556036	both	1354.41	1138.41	442.505	4.11526	1.26578e-11	10.8976	1346.65520254088	1141.39702702287	444.916645880373	4.08956	7.63411e-12	11.1172
zgc:154075	ENSDARG00000067630	556929	both	687.893	747.324	632.974	1.84274	4.76167e-05	4.32224	747.17016648913	780.599492209709	689.524498810274	1.77861	4.49816e-05	4.34697
zgc:154093	ENSDARG00000055897	777623	both	841.405	697.954	633.936	1.56469	0.000673672	3.17155	836.558534911757	696.445643607175	638.484277529626	1.56735	0.000507987	3.29415
zgc:158423	ENSDARG00000055791	790938	both	6029.75	13402.5	5057.06	4.23249	3.36812e-06	5.47261	5997.76519861821	13371.7563572578	5094.39189763457	4.23079	3.09701e-06	5.50906
zgc:158659	ENSDARG00000060597	791141	both	1123.17	1101.63	487.717	2.57182	8.1903e-06	5.0867	1517.65903778416	1300.03186806673	563.368480173199	2.77748	3.08757e-06	5.51038
zgc:162239	ENSDARG00000019651	558037	both	76.7564	37.7534	73.1095	2.64378	0.0129173	1.88883	75.7857906191836	37.724139028722	74.1527743133954	2.69091	0.0109947	1.95881
zgc:162707	ENSDARG00000061664	100002095	both	731.615	830.575	516.576	1.26172	0.0122758	1.91095	692.759855275357	781.56677782583	513.291281935581	1.35715	0.00357277	2.447
zgc:162939	ENSDARG00000068461	560737	both	2182.21	2026.1	912.906	2.21273	2.15409e-05	4.66674	2360.0472488974	2189.93463489812	960.133973902016	2.02892	0.000150623	3.82211
zgc:162944	ENSDARG00000069846	569993	both	2673.84	2453.97	1798.88	1.29684	0.0190079	1.72107	2656.38912247241	2446.2653231702	1812.40936698455	1.29854	0.0154178	1.81198
zgc:171679	ENSDARG00000071024	110437713	RefSeq	106.876	129.717	180.85	0.25556	0.799541	0.0971591	1427.29905666129	1456.73213787834	741.527743133954	1.55237	0.00142305	2.84678
zgc:171686	ENSDARG00000076721	555931	both	581.017	576.95	494.451	4.22965	4.14852e-19	18.3821	578.109556646336	575.534941592041	498.845936290115	4.22971	2.14291e-19	18.669
zgc:172122	ENSDARG00000079191	571844	both	161.286	277.826	268.389	2.03734	0.00198426	2.7024	984.24366534914	1214.91073384807	544.108019312577	2.83878	1.79872e-07	6.74504
zgc:174356	ENSDARG00000088263	100137120	both	173.916	54.21	70.2236	3.41007	0.000194194	3.71176	172.947060643778	54.1679945027803	65.4855669261154	3.33297	0.000285245	3.54478
zgc:174888	ENSDARG00000077176	558116	both	1129.97	1336.86	1442.95	1.38112	0.00473082	2.32506	1124.15589418456	1303.90101053121	1427.2001497721	1.39416	0.00307113	2.5127
zgc:175248	ENSDARG00000104153	565810	Ens95	114.649	90.0274	165.458	2.23844	0.000622639	3.20576	26.2335429066405	38.6914246448431	86.6720738727998	1.79777	0.108124	0.966077
zgc:193505	ENSDARG00000093584	559113	both	1300.97	583.726	371.319	1.97618	0.0103531	1.98493	1334.99585013793	600.684367611189	372.689917653039	1.97298	0.00873709	2.05863
zgc:194398	ENSDARG00000078250	100189615	both	575.187	1111.31	307.829	1.97119	0.00367838	2.43434	572.279880444861	1108.50931607475	310.093419856017	1.97174	0.00324413	2.4889
zgc:195173	ENSDARG00000077138	792613	both	735.501	851.872	431.923	1.85747	0.00333734	2.4766	712.192109280276	855.080484651032	445.879668923404	1.87359	0.00332459	2.47826
zgc:56699	ENSDARG00000000887	405758	RefSeq	106.876	68.7306	168.344	1.44997	0.0962342	1.01667	102.99094622607	61.9062794317489	131.934156895262	1.65996	0.0360455	1.44315
zgc:63831	ENSDARG00000009313	336746	both	299.253	334.941	367.471	1.41978	0.0209048	1.67975	309.944451378456	345.320964955224	369.800848523946	1.47196	0.0133365	1.87496
zgc:63882	ENSDARG00000004525	393373	both	579.073	569.205	525.234	1.03416	0.0264523	1.57754	652.923734565274	755.450066190561	530.625696710141	1.01999	0.0396521	1.40173
zgc:64051	ENSDARG00000068233	393342	both	311.884	268.146	1168.79	2.00041	0.0332698	1.47795	301.199937076242	263.101687584933	1173.92508945492	2.03073	0.0311749	1.50619
zgc:64106	ENSDARG00000011371	393348	both	1097.91	1226.5	875.39	3.20727	1.99829e-12	11.6993	1070.71719567103	1210.07430576747	879.240038287403	3.2427	3.17612e-12	11.4981
zgc:66427	ENSDARG00000023303	406256	both	1410.76	1248.77	942.727	1.53959	0.000182815	3.73799	1403.00873915514	1245.86387356395	949.540720428674	1.54043	0.000112236	3.94987
zgc:77151	ENSDARG00000054307	337153	RefSeq	312.855	239.105	312.639	1.15333	0.058272	1.23454	310.916064078702	237.952261565785	314.908535071173	1.15568	0.049799	1.30278
zgc:77375	ENSDARG00000004282	402927	both	65.0972	52.274	19.2393	2.89028	0.0213456	1.67069	52.4670858132809	52.2334232705381	19.2604608606222	2.75029	0.0307876	1.51162
zgc:77486	ENSDARG00000093978	405808	Ens95	805.456	933.187	391.52	1.56552	0.0100214	1.99907	1408.83841535662	1866.86123911368	1534.09570754856	0.55432	0.23302	0.632607
zgc:77650	ENSDARG00000113899	334219	both	1520.55	2039.65	1488.16	1.16744	0.00389759	2.4092	1088.20622427546	1826.23524323659	1245.18879463922	1.09799	0.0137641	1.86125
zgc:77849	ENSDARG00000012458	322387	both	8882.36	7024.07	6376.88	1.23625	0.00137494	2.86172	8679.41625129701	6799.05059571505	6396.39905181263	1.21965	0.000992972	3.00306
zgc:91944	ENSDARG00000035887	436941	both	1189.24	1285.55	733.019	1.2208	0.0181279	1.74165	1166.90685299538	1279.71887012818	736.712627918799	1.20477	0.0154078	1.81226
znf330	ENSDARG00000020494	406682	RefSeq	633.483	328.164	212.595	1.27823	0.0584974	1.23286	627.661804358879	326.942538248924	210.902046423813	1.33831	0.0383447	1.41629
znf521	ENSDARG00000086825	799182	RefSeq	86.4724	59.0502	37.5167	1.43082	0.198266	0.702752	698.589531476833	432.376670406121	227.273438155342	1.89044	0.00284238	2.54632
znfl2a	ENSDARG00000008333	373087	both	192.377	122.941	371.319	2.08707	0.00450283	2.34651	191.407701948451	122.845273247377	373.65294069607	2.10722	0.00383503	2.41623
zyg11	ENSDARG00000007737	555349	both	1023.09	694.082	1048.54	1.04125	0.0267102	1.57332	1016.30688445726	686.772787445964	1055.4732551621	1.04389	0.021801	1.66152
