# Supplementary material for: An improved zebrafish transcriptome annotation for sensitive and comprehensive detection of cell type-specific genes
Source: eLife. 2020 Aug 24;9:e55792. doi: 10.7554/eLife.55792 (PMC7486121; doi:10.7554/eLife.55792)
Supplement: Figure 2—source data 1. — This file includes lists of Ens95 (worksheet 1) and RefSeq (worksheet 2) genes indicating annotation as coding sequence (CDS) and whether there is an annotated stop codon and 3' UTR. Data from RNA-seq-based quantification for Ens95 genes missing a 3' UTR that is present in RefSeq is included for kdrlpos (worksheet 3), pdgfrbpos (worksheet 4), and Nr2f2pos (worksheet 5) cells. These data were used to generate Table 2 and graphs in Figure 2A,B; Figure 2—figure supplement 2I. [file elife-55792-fig2-data1.xlsx]

## Sheet: title
	Figure 2 - source data 1
	Missing 3' UTR annotations in RefSeq and Ens95
	Worksheet 1 - Ens95 genes with coding sequence (CDS), stop codon, and 3' UTR annotation
	Worksheet 2 -RefSeq genes with coding sequence (CDS), stop codon, and 3' UTR annotation
	Worksheet 3 - kdrlPos RNA-seq quantification from Ens95 and RefSeq for genes with 3' UTRs
	Worksheet 4 - pdgfrbPos RNA-seq quantification from Ens95 and RefSeq for genes with 3' UTRs
	Worksheet 5 - Nr2f2Pos RNA-seq quantification from Ens95 and RefSeq for genes with 3' UTRs

## Sheet: 1 Ens95
Ens95 Gene Symbol	Ens95 gene ID	annotated CDS	annotated stop codon	annotated 3'UTR	NCBI ID
a1cf	ENSDARG00000002968	yes	yes	yes	562916
a2ml	ENSDARG00000056314	yes	yes	yes	100006972
aaas	ENSDARG00000102274	yes	yes	yes	378454		total Ens95 genes	32520
aacs	ENSDARG00000012468	yes	yes	yes	393984		with annotated CDS	25592
aadac	ENSDARG00000063621	yes	yes	yes	100148912		CDS with annotated stop	24007
aadacl4	ENSDARG00000044802	yes	yes	yes	569798		CDS with annotated 3' UTR	20889
aadat	ENSDARG00000011410	yes	yes	yes	557979
aagab	ENSDARG00000041170	yes	yes	yes	436696
aak1a	ENSDARG00000011855	yes	yes	no	568999
aak1b	ENSDARG00000077686	yes	yes	yes	100534954		CDS missing stop codon	1585
aamdc	ENSDARG00000103957	yes	yes	yes	553802		CDS missing 3' UTR	4703
aamp	ENSDARG00000045019	yes	yes	yes	405874
aanat1	ENSDARG00000036567	yes	yes	yes	393677
aanat2	ENSDARG00000079802	yes	yes	yes	30685
aar2	ENSDARG00000018658	yes	yes	yes	431768
aars	ENSDARG00000069142	yes	yes	yes	324940
aars2	ENSDARG00000107385	yes	yes	yes	100536819
aarsd1	ENSDARG00000015747	yes	yes	yes	445178
aasdh	ENSDARG00000022730	yes	yes	yes	570338
aasdhppt	ENSDARG00000037501	yes	yes	yes	619247
aass	ENSDARG00000051816	yes	yes	yes	556229
aatf	ENSDARG00000025467	yes	yes	yes	559477
aatka	ENSDARG00000078222	yes	yes	yes	100004850
aatkb	ENSDARG00000104442	yes	yes	no	555739
abat	ENSDARG00000006031	yes	yes	yes	378968
abca12	ENSDARG00000074749	yes	yes	yes
abca1a	ENSDARG00000074635	yes	yes	yes	558924
abca1b	ENSDARG00000079009	yes	yes	yes	100136868
abca2	ENSDARG00000013500	yes	yes	yes	100006090
abca3b	ENSDARG00000100524	yes	yes	yes	564344
abca4a	ENSDARG00000057169	yes	yes	yes	798993
abca4b	ENSDARG00000062661	yes	yes	yes	555506
abca5	ENSDARG00000074041	yes	yes	yes	100151075
abcb10	ENSDARG00000061591	yes	yes	yes	100003744
abcb11a	ENSDARG00000011573	yes	yes	yes	797269
abcb11b	ENSDARG00000070078	yes	yes	yes	571189
abcb4	ENSDARG00000010936	yes	yes	yes	100136865
abcb5	ENSDARG00000021787	yes	yes	yes	798527
abcb6a	ENSDARG00000063297	yes	yes	yes	564067
abcb6b	ENSDARG00000074254	yes	no	no	100004801
abcb7	ENSDARG00000062795	yes	yes	yes	566515
abcb8	ENSDARG00000056672	yes	yes	yes	548340
abcb9	ENSDARG00000056200	yes	yes	yes	570148
abcc1	ENSDARG00000104719	yes	yes	yes	100002010
abcc10	ENSDARG00000077988	yes	yes	yes	556709
abcc12	ENSDARG00000013050	yes	yes	yes	568482
abcc13	ENSDARG00000062519	yes	yes	yes	559093
abcc2	ENSDARG00000014031	yes	yes	yes	393561
abcc3	ENSDARG00000096662	yes	yes	yes	323301
abcc4	ENSDARG00000058953	yes	yes	yes	368620
abcc5	ENSDARG00000061233	yes	yes	no	336147
abcc6a	ENSDARG00000016750	yes	yes	yes	566555
abcc6b.1	ENSDARG00000105403	yes	yes	yes	110439293
abcc6b.2	ENSDARG00000094901	yes	yes	yes	100002917
abcc8	ENSDARG00000051879	yes	yes	yes	553281
abcc8b	ENSDARG00000077007	yes	yes	no	100329706
abcc9	ENSDARG00000015985	yes	yes	yes	561160
abcd1	ENSDARG00000074876	yes	yes	yes	566367
abcd2	ENSDARG00000059409	yes	yes	yes	100537809
ABCD2	ENSDARG00000099178	yes	yes	no
abcd3a	ENSDARG00000104085	yes	yes	yes	406803
abcd3b	ENSDARG00000002947	yes	yes	yes	100170781
abcd4	ENSDARG00000061770	yes	yes	yes	767748
abce1	ENSDARG00000007216	yes	yes	yes	406324
abcf1	ENSDARG00000031795	yes	yes	yes	406467
abcf2a	ENSDARG00000038785	yes	yes	yes	336770
abcf2b	ENSDARG00000052331	yes	yes	yes	100000576
abcf3	ENSDARG00000089705	yes	yes	no	100331227
abcg1	ENSDARG00000063475	yes	yes	yes	556979
abcg2a	ENSDARG00000100075	yes	yes	no	735312
abcg2b	ENSDARG00000079361	yes	yes	yes	570453
abcg2c	ENSDARG00000058574	yes	yes	yes	569858
abcg2d	ENSDARG00000016818	yes	yes	yes	735310
abcg4a	ENSDARG00000061047	yes	yes	no	564842
abcg4b	ENSDARG00000078068	yes	yes	yes	794238
abcg5	ENSDARG00000063078	yes	yes	yes	557317
abcg8	ENSDARG00000063059	yes	yes	yes	100136850
abch1	ENSDARG00000071341	yes	yes	yes	558667
abhd10a	ENSDARG00000076435	yes	yes	yes	568517
abhd11	ENSDARG00000069501	yes	yes	no	446169
abhd12	ENSDARG00000071004	yes	yes	yes	767657
abhd13	ENSDARG00000059209	yes	yes	yes	561333
abhd14a	ENSDARG00000058367	yes	yes	yes	404598
abhd14b	ENSDARG00000100531	yes	yes	yes	393338
abhd15a	ENSDARG00000078768	yes	yes	yes	560644
abhd16a	ENSDARG00000078929	yes	yes	yes	564613
abhd17aa	ENSDARG00000091433	yes	yes	yes	322121
abhd17ab	ENSDARG00000043084	yes	yes	yes	100003419
abhd17b	ENSDARG00000035571	yes	yes	yes	437017
abhd17c	ENSDARG00000058452	yes	yes	yes	393126
abhd18	ENSDARG00000101961	yes	yes	yes	503769
abhd2a	ENSDARG00000025797	yes	yes	yes	393888
abhd2b	ENSDARG00000045804	yes	yes	yes	559290
abhd3	ENSDARG00000018809	yes	yes	yes	447830
abhd4	ENSDARG00000102887	yes	yes	yes	550276
abhd5b	ENSDARG00000100388	yes	yes	yes	100329433
abhd6a	ENSDARG00000060756	yes	yes	yes	799085
abhd6b	ENSDARG00000070894	yes	yes	yes	558995
abhd8a	ENSDARG00000103518	yes	yes	yes
abhd8b	ENSDARG00000076620	yes	yes	yes	101883400
abi1a	ENSDARG00000010155	yes	yes	yes	393711
abi1b	ENSDARG00000062991	yes	yes	yes	767738
abi2a	ENSDARG00000058207	yes	yes	yes	767646
abi2b	ENSDARG00000014875	yes	yes	yes	692331
abi3a	ENSDARG00000060072	yes	yes	yes	767807
abi3b	ENSDARG00000063283	yes	yes	yes	566059
abi3bpa	ENSDARG00000062156	yes	yes	no	101884149
abi3bpb	ENSDARG00000071095	yes	yes	yes	100149890
abl1	ENSDARG00000035187	yes	yes	yes	100000720
abl2	ENSDARG00000013841	yes	yes	yes	570636
ablim1a	ENSDARG00000060149	yes	yes	yes	100003558
ablim1b	ENSDARG00000045064	yes	yes	yes	541550
ablim2	ENSDARG00000055223	yes	yes	yes	568454
ablim3	ENSDARG00000088168	yes	yes	yes	566821
abo	ENSDARG00000019207	yes	yes	no	563897
abr	ENSDARG00000095180	yes	yes	no	565190
abraa	ENSDARG00000038583	yes	yes	yes	324520
abrab	ENSDARG00000033854	yes	yes	yes	445477
abracl	ENSDARG00000042876	yes	yes	yes	336650
abraxas1	ENSDARG00000043339	yes	yes	yes	449820
abraxas2	ENSDARG00000098907	yes	yes	yes	406584
abt1	ENSDARG00000043666	yes	yes	yes	553568
abtb1	ENSDARG00000063354	yes	yes	yes	100536189
abtb2a	ENSDARG00000059751	yes	yes	yes	559451
abtb2b	ENSDARG00000062000	yes	yes	yes	100007078
acaa1	ENSDARG00000004687	yes	yes	yes	431754
acaa2	ENSDARG00000038881	yes	yes	yes	406325
acaca	ENSDARG00000078512	yes	yes	yes	559403
acacb	ENSDARG00000061994	yes	yes	yes	556236
acad11	ENSDARG00000045411	yes	yes	yes	393147
acad8	ENSDARG00000042658	yes	yes	yes	394130
acad9	ENSDARG00000055620	yes	yes	yes	724002
acadl	ENSDARG00000088357	yes	yes	yes	394156
acadm	ENSDARG00000038900	yes	yes	yes	406283
acads	ENSDARG00000030781	yes	yes	yes	445288
acadsb	ENSDARG00000076780	yes	yes	yes	110437777
acadvl	ENSDARG00000016687	yes	yes	yes	573723
acana	ENSDARG00000035891	yes	yes	yes	497505
acanb	ENSDARG00000045799	yes	yes	no	559593
acap1	ENSDARG00000056346	yes	yes	yes	561771
acap2	ENSDARG00000060783	yes	yes	yes	100124613
acap3a	ENSDARG00000075990	yes	yes	yes	322991
acap3b	ENSDARG00000099240	yes	yes	yes	100009646
acat1	ENSDARG00000045888	yes	yes	yes	445290
acat2	ENSDARG00000007127	yes	yes	yes	30643
acbd3	ENSDARG00000042623	yes	yes	yes	406270
acbd4	ENSDARG00000027070	yes	yes	yes	406368
acbd5a	ENSDARG00000034883	yes	yes	yes	553674
acbd5b	ENSDARG00000058410	yes	yes	yes	100004736
acbd6	ENSDARG00000039456	yes	yes	yes	324090
acbd7	ENSDARG00000094730	yes	yes	yes	619256
accs	ENSDARG00000052124	yes	yes	yes	541510
acd	ENSDARG00000078055	yes	yes	yes	794664
ace	ENSDARG00000079166	yes	yes	yes	565980
ace2	ENSDARG00000016918	yes	yes	yes	492331
acer1	ENSDARG00000010347	yes	yes	yes	550266
acer2	ENSDARG00000077782	yes	yes	no	100331179
acer3	ENSDARG00000093366	yes	no	no	555411
ache	ENSDARG00000031796	yes	yes	yes	114549
acin1a	ENSDARG00000054290	yes	yes	yes	368893
acin1b	ENSDARG00000026842	yes	yes	yes	327495
ACKR2	ENSDARG00000086314	yes	yes	no	101887081
ackr3a	ENSDARG00000062478	yes	yes	yes	100000764
ackr3b	ENSDARG00000058179	yes	yes	yes	561050
ackr4a	ENSDARG00000078729	yes	yes	no	100003167
ackr4b	ENSDARG00000040133	yes	yes	yes	641390
aclya	ENSDARG00000099079	yes	yes	yes	436922
aclyb	ENSDARG00000055652	yes	yes	yes	794259
acmsd	ENSDARG00000062549	yes	yes	yes	557166
aco1	ENSDARG00000026376	yes	yes	no	568448
aco2	ENSDARG00000007294	yes	yes	yes	322670
acod1	ENSDARG00000069844	yes	yes	no	795305
acot11a	ENSDARG00000058229	yes	yes	yes	554842
acot11b	ENSDARG00000042122	yes	yes	yes	641574
ACOT12	ENSDARG00000054534	yes	yes	yes	100536873
acot13	ENSDARG00000061728	yes	yes	yes	564010
acot14	ENSDARG00000089159	yes	yes	yes	557184
acot15	ENSDARG00000045522	yes	yes	yes	557032
acot16	ENSDARG00000069292	yes	yes	yes	402867
acot17	ENSDARG00000088524	yes	yes	yes	572757
acot18	ENSDARG00000033413	yes	yes	yes	556673
acot19	ENSDARG00000040427	yes	yes	yes	492778
acot20	ENSDARG00000042510	yes	yes	yes	553440
acot21	ENSDARG00000042513	yes	no	no	562047
acot22	ENSDARG00000058945	yes	yes	yes	553217
acot7	ENSDARG00000018653	yes	yes	yes	447878
acot8	ENSDARG00000014138	yes	yes	yes	450052
acot9.1	ENSDARG00000058352	yes	yes	yes	798073
acot9.2	ENSDARG00000058390	yes	yes	yes	798008
acox1	ENSDARG00000014727	yes	yes	yes	449662
acox3	ENSDARG00000038865	yes	yes	yes	406421
acoxl	ENSDARG00000020149	yes	yes	no	569104
acp1	ENSDARG00000076486	yes	yes	yes	541489
acp2	ENSDARG00000007244	yes	no	no	503759
acp5a	ENSDARG00000019763	yes	yes	yes	406801
acp5b	ENSDARG00000101456	yes	yes	yes	436725
acp6	ENSDARG00000040064	yes	yes	yes	558758
acp7	ENSDARG00000102421	yes	no	no	571830
acsbg1	ENSDARG00000062077	yes	yes	no	100006023
acsbg2	ENSDARG00000004094	yes	yes	yes	335159
acsf2	ENSDARG00000061201	yes	yes	yes	751707
ACSF3	ENSDARG00000059503	yes	yes	yes	562292
acsl1a	ENSDARG00000030514	yes	yes	yes	555308
acsl1b	ENSDARG00000003854	yes	yes	yes	445175
acsl2	ENSDARG00000078399	yes	yes	yes	100332846
acsl3a	ENSDARG00000032079	yes	yes	no	567157
acsl3b	ENSDARG00000014674	yes	yes	yes	559656
acsl4a	ENSDARG00000004078	yes	yes	yes	393622
acsl4b	ENSDARG00000010752	yes	yes	yes	334561
acsl5	ENSDARG00000075931	yes	yes	yes	447860
acsm3	ENSDARG00000004880	yes	yes	yes	100002035
acss1	ENSDARG00000044142	yes	yes	yes	541435
acss2	ENSDARG00000037781	yes	yes	yes	436914
acss2l	ENSDARG00000069029	yes	yes	no	560020
acss3	ENSDARG00000032218	yes	yes	yes	566019
acta1a	ENSDARG00000036371	yes	yes	yes	550445
acta1b	ENSDARG00000055618	yes	yes	yes	407658
acta2	ENSDARG00000045180	yes	yes	yes	322509
actb1	ENSDARG00000037746	yes	yes	yes	57934
actb2	ENSDARG00000037870	yes	yes	yes	57935
actc1a	ENSDARG00000076126	yes	yes	yes	337770
actc1a	ENSDARG00000042535	yes	yes	yes	408256
actc1b	ENSDARG00000099197	yes	yes	yes	58114
actc1c	ENSDARG00000079111	yes	yes	yes	415164
actl6a	ENSDARG00000070828	yes	yes	yes	192313
actl6b	ENSDARG00000034107	yes	yes	yes	553775
actn1	ENSDARG00000007219	yes	yes	yes	560400
actn2b	ENSDARG00000071090	yes	yes	yes	641575
actn3a	ENSDARG00000013755	yes	yes	yes	58037
actn3b	ENSDARG00000001431	yes	yes	yes	323320
actn4	ENSDARG00000099786	yes	yes	yes	322221
actr1	ENSDARG00000011611	yes	yes	yes	406681
actr10	ENSDARG00000038432	yes	yes	yes	393139
actr2a	ENSDARG00000052438	yes	yes	yes	406820
actr2b	ENSDARG00000070076	yes	yes	yes	554861
actr3	ENSDARG00000091138	yes	yes	yes	406250
actr3b	ENSDARG00000008790	yes	yes	yes	100038776
actr5	ENSDARG00000098235	yes	yes	yes	406809
actr6	ENSDARG00000021370	yes	yes	yes	324822
actr8	ENSDARG00000103610	yes	yes	yes	326866
acvr1ba	ENSDARG00000018968	yes	yes	yes	30183
acvr1bb	ENSDARG00000052142	yes	yes	yes	559222
ACVR1C	ENSDARG00000086172	yes	yes	yes	100331105
acvr1l	ENSDARG00000014986	yes	yes	yes	30615
acvr2aa	ENSDARG00000011188	yes	yes	yes	553359
acvr2ab	ENSDARG00000104700	yes	yes	no	100331014
acvr2ba	ENSDARG00000044422	yes	yes	no	30457
acvr2bb	ENSDARG00000103108	yes	yes	no	100331938
acvrl1	ENSDARG00000018179	yes	yes	yes	266753
acy1	ENSDARG00000111129	yes	yes	yes	100001620
acy1	ENSDARG00000038475	yes	yes	yes	103909643
acy3.1	ENSDARG00000093003	yes	yes	yes	791456
acy3.2	ENSDARG00000005525	yes	yes	yes	436619
acyp1	ENSDARG00000060126	yes	yes	yes	571263
acyp2	ENSDARG00000086271	yes	yes	no	101886626
ada	ENSDARG00000003113	yes	yes	yes	436919
ada2a	ENSDARG00000051746	yes	yes	yes	373884
ada2b	ENSDARG00000015623	yes	yes	yes	559295
adad1	ENSDARG00000089181	yes	yes	yes	564818
adad2	ENSDARG00000105626	yes	yes	yes	558824
adal	ENSDARG00000012986	yes	yes	yes	619263
adam10a	ENSDARG00000053468	yes	yes	yes	566044
adam10b	ENSDARG00000015502	yes	no	no	393392
adam11	ENSDARG00000079204	yes	yes	yes	567145
ADAM12	ENSDARG00000116062	yes	yes	no	101884222
adam12	ENSDARG00000079068	yes	yes	yes	563275
adam15	ENSDARG00000089213	yes	yes	yes	795199
adam17a	ENSDARG00000043213	yes	yes	yes	324142
adam17b	ENSDARG00000093093	yes	yes	yes	560657
adam19a	ENSDARG00000059693	yes	yes	yes
adam19b	ENSDARG00000067545	yes	yes	yes	571252
adam22	ENSDARG00000060532	yes	yes	yes	100126805
adam23a	ENSDARG00000062323	yes	yes	yes	794175
adam28	ENSDARG00000035514	yes	yes	yes	767749
adam8a	ENSDARG00000001452	yes	yes	yes	368917
adam8b	ENSDARG00000057644	yes	yes	yes	100005593
adam9	ENSDARG00000010070	yes	yes	yes	447940
adamts1	ENSDARG00000103519	yes	yes	no	565145
adamts10	ENSDARG00000075188	yes	yes	yes	564734
adamts12	ENSDARG00000067549	yes	yes	yes	100003937
adamts13	ENSDARG00000076270	yes	yes	yes	100320289
adamts14	ENSDARG00000078494	yes	yes	no	101886422
adamts15a	ENSDARG00000029124	yes	yes	no	569571
adamts15b	ENSDARG00000033544	yes	yes	yes	100002059
adamts15b	ENSDARG00000058252	yes	yes	yes	100001991
adamts16	ENSDARG00000074646	yes	yes	no	568792
adamts17	ENSDARG00000075555	yes	yes	no	101884120
adamts18	ENSDARG00000001999	yes	yes	yes	100150128
adamts2	ENSDARG00000075930	yes	yes	yes	571682
adamts3	ENSDARG00000060127	yes	yes	no	102467218
adamts5	ENSDARG00000100307	yes	yes	no	565053
adamts6	ENSDARG00000041982	yes	yes	no	569099
ADAMTS7	ENSDARG00000102478	yes	yes	no	560364
adamts8a	ENSDARG00000007709	yes	no	no	569618
adamts9	ENSDARG00000077778	yes	yes	yes	100333407
adamtsl2	ENSDARG00000074033	yes	yes	yes	100537087
adamtsl3	ENSDARG00000027903	yes	yes	yes	100534944
adamtsl5	ENSDARG00000052118	yes	yes	yes	101886605
adamtsl7	ENSDARG00000055439	yes	yes	yes	556634
adap2	ENSDARG00000070565	yes	yes	no	100331455
adar	ENSDARG00000012389	yes	yes	yes	58119
adarb1a	ENSDARG00000041609	yes	yes	yes	58134
adarb1b	ENSDARG00000003544	yes	yes	yes	558759
adarb2	ENSDARG00000071823	yes	yes	no	558149
adat1	ENSDARG00000061348	yes	yes	yes	792614
adat2	ENSDARG00000041944	yes	yes	yes	100034610
adat3	ENSDARG00000005640	yes	yes	yes	368634
adck1	ENSDARG00000062561	yes	yes	yes	100144553
adck2	ENSDARG00000073923	yes	yes	yes	572087
adck5	ENSDARG00000075405	yes	yes	yes	100001584
adcy1a	ENSDARG00000069026	yes	yes	yes	557026
adcy1b	ENSDARG00000088634	yes	yes	yes	569499
adcy2a	ENSDARG00000058392	yes	yes	no	563724
adcy2b	ENSDARG00000014588	yes	yes	yes	557902
adcy3a	ENSDARG00000077145	yes	yes	no	571825
adcy3b	ENSDARG00000017437	yes	yes	yes	564719
adcy5	ENSDARG00000091342	yes	yes	yes	562619
adcy6a	ENSDARG00000061445	yes	yes	yes	570652
adcy6b	ENSDARG00000027797	yes	yes	yes	560807
adcy7	ENSDARG00000060070	yes	yes	yes	568726
adcy8	ENSDARG00000031783	yes	yes	no	100148976
adcy9	ENSDARG00000100869	yes	yes	no	100333702
adcyap1a	ENSDARG00000004015	yes	yes	yes	259257
adcyap1b	ENSDARG00000027740	yes	yes	yes	335625
adcyap1r1a	ENSDARG00000105201	yes	yes	yes	541315
adcyap1r1a	ENSDARG00000053724	yes	yes	yes	555473
add1	ENSDARG00000103962	yes	yes	no	555511
add2	ENSDARG00000074581	yes	yes	yes	570147
add3a	ENSDARG00000040874	yes	yes	yes	556762
add3b	ENSDARG00000056250	yes	yes	yes	553243
adgb	ENSDARG00000005595	yes	yes	yes	555435
adgra1a	ENSDARG00000054177	yes	yes	yes	560847
adgra2	ENSDARG00000076994	yes	yes	no	560700
adgra3	ENSDARG00000073673	yes	yes	no
adgrb1a	ENSDARG00000075133	yes	yes	yes	563527
adgrb1b	ENSDARG00000078529	yes	yes	yes	100302472
adgrb2	ENSDARG00000025667	yes	yes	no
adgrb3	ENSDARG00000059832	yes	yes	yes	566117
adgrd1	ENSDARG00000053344	yes	yes	yes
adgrd2	ENSDARG00000103067	yes	no	no	571770
adgre10	ENSDARG00000075855	yes	yes	yes	569655
adgre14	ENSDARG00000056062	yes	yes	yes	108182849
adgre15	ENSDARG00000096588	yes	no	no	100536619
adgre16	ENSDARG00000096622	yes	no	no	110437794
adgre17	ENSDARG00000095297	yes	yes	yes
adgre18	ENSDARG00000096644	yes	yes	yes
adgre19	ENSDARG00000096649	yes	no	no
adgre5a	ENSDARG00000026313	yes	no	no
adgre5b.2	ENSDARG00000104083	yes	yes	yes	101882660
adgre5b.3	ENSDARG00000089904	yes	yes	yes	792970
adgre5b.3	ENSDARG00000112943	yes	no	no	100536657
adgre6	ENSDARG00000095494	yes	no	no
adgre7	ENSDARG00000041399	yes	yes	yes
adgre8	ENSDARG00000079050	yes	yes	yes
adgre9	ENSDARG00000096577	yes	yes	yes	101883848
adgrf11	ENSDARG00000075134	yes	yes	yes	100537132
adgrf3a	ENSDARG00000087870	yes	yes	yes	101886922
adgrf3b	ENSDARG00000093008	yes	yes	yes	565465
adgrf6	ENSDARG00000091757	yes	yes	yes
adgrf7	ENSDARG00000086445	yes	yes	yes
adgrf8	ENSDARG00000093316	yes	yes	yes	100537224
adgrg1	ENSDARG00000105643	yes	yes	yes	101882156
adgrg1	ENSDARG00000027222	yes	yes	yes	324948
adgrg11	ENSDARG00000041413	yes	yes	yes	563883
adgrg2a	ENSDARG00000088137	yes	yes	no	101882832
adgrg3	ENSDARG00000074782	yes	yes	yes	799479
adgrg4a	ENSDARG00000105416	yes	yes	yes	793963
adgrg4b	ENSDARG00000094386	yes	yes	yes
adgrg6	ENSDARG00000054137	yes	yes	yes	561970
adgrg7.1	ENSDARG00000071088	yes	no	no
adgrg7.2	ENSDARG00000071085	yes	no	no
adgrl1a	ENSDARG00000089292	yes	yes	no	562531
adgrl2a	ENSDARG00000069356	yes	yes	yes	57987
adgrl2b.1	ENSDARG00000111712	yes	yes	yes	110437953
ADGRL3	ENSDARG00000090624	yes	yes	no
adgrl3.1	ENSDARG00000061121	yes	yes	yes	560631
adgrl4	ENSDARG00000013653	yes	yes	yes	406676
adgrv1	ENSDARG00000021137	yes	yes	yes	415105
adh5	ENSDARG00000080010	yes	yes	yes	116517
adh8a	ENSDARG00000091211	yes	yes	yes	322482
adh8b	ENSDARG00000024278	yes	yes	yes	402841
adhfe1	ENSDARG00000053518	yes	yes	yes	404618
adi1	ENSDARG00000020448	yes	yes	yes	324079
adipoqa	ENSDARG00000062228	yes	yes	yes	562602
adipoqb	ENSDARG00000100086	yes	yes	yes	751715
adipor1a	ENSDARG00000002912	yes	yes	yes	436740
adipor1b	ENSDARG00000042717	yes	yes	yes	406821
adipor2	ENSDARG00000101849	yes	yes	yes	560140
adka	ENSDARG00000039429	yes	yes	yes	368220
adkb	ENSDARG00000095947	yes	yes	yes	322229
adm2a	ENSDARG00000045708	yes	yes	yes	403114
adm2b	ENSDARG00000078875	yes	yes	yes	100322075
adma	ENSDARG00000015263	yes	yes	yes	556502
admb	ENSDARG00000069027	yes	yes	yes	570100
admp	ENSDARG00000025372	yes	yes	yes	140619
adnp2a	ENSDARG00000060937	yes	yes	yes	100007394
adnp2b	ENSDARG00000028431	yes	yes	yes	564171
adnpa	ENSDARG00000062002	yes	yes	yes	564637
adnpb	ENSDARG00000074293	yes	yes	yes	100330315
adoa	ENSDARG00000042827	yes	yes	yes	494091
adob	ENSDARG00000053571	yes	yes	yes	406474
adora1a	ENSDARG00000070056	yes	no	no	100007535
adora1b	ENSDARG00000075694	yes	yes	no	100150997
adora2aa	ENSDARG00000033706	yes	yes	yes	561701
adora2ab	ENSDARG00000058488	yes	yes	yes	566118
adora2b	ENSDARG00000002533	yes	yes	yes	560100
adpgk	ENSDARG00000063525	yes	yes	yes	557919
adpgk2	ENSDARG00000062785	yes	yes	yes	566398
adprh	ENSDARG00000040712	yes	yes	yes	445059
adprhl1	ENSDARG00000041589	yes	yes	yes	450012
adprhl2	ENSDARG00000019338	yes	yes	yes	796446
adprm	ENSDARG00000026090	yes	yes	yes	393393
adra1aa	ENSDARG00000028725	yes	yes	yes	798498
adra1ab	ENSDARG00000027638	yes	yes	no	557259
adra1ba	ENSDARG00000011317	yes	yes	no	100149100
adra1bb	ENSDARG00000041173	yes	yes	yes	492486
adra1d	ENSDARG00000024101	yes	yes	yes	568614
adra2a	ENSDARG00000040841	yes	yes	no	266750
adra2b	ENSDARG00000102096	yes	yes	yes	266751
adra2c	ENSDARG00000069669	yes	yes	yes	266752
adra2da	ENSDARG00000091277	yes	yes	yes	266754
adra2db	ENSDARG00000054667	yes	yes	no	266755
adrb1	ENSDARG00000007490	yes	yes	yes	557194
adrb2a	ENSDARG00000088124	yes	yes	yes	565838
adrb2b	ENSDARG00000054510	yes	yes	yes	100037315
adrb3a	ENSDARG00000053646	yes	yes	yes	558248
adrb3b	ENSDARG00000052919	yes	yes	yes	792519
adrm1	ENSDARG00000058560	yes	yes	yes	796450
adsl	ENSDARG00000017049	yes	yes	yes	334431
adss	ENSDARG00000002071	yes	yes	yes	550502
adssl	ENSDARG00000012399	yes	yes	yes	192305
adssl1	ENSDARG00000099517	yes	yes	yes	407989
adtrp1	ENSDARG00000037810	yes	yes	yes	550414
aebp1	ENSDARG00000091726	yes	yes	yes	793308
aebp2	ENSDARG00000006038	yes	yes	yes	406815
aep1	ENSDARG00000039099	yes	yes	yes	503710
aes	ENSDARG00000021805	yes	yes	yes	393395
afap1	ENSDARG00000055284	yes	yes	yes	568356
afap1l1a	ENSDARG00000089162	yes	yes	yes	566757
afap1l1b	ENSDARG00000056453	yes	yes	yes	768144
afap1l2	ENSDARG00000074806	yes	yes	yes	567369
afdna	ENSDARG00000029472	yes	yes	yes	558359
aff2	ENSDARG00000052242	yes	yes	yes	100330019
aff3	ENSDARG00000079575	yes	yes	yes	570215
aff4	ENSDARG00000001857	yes	yes	no	556421
afg1la	ENSDARG00000011466	yes	yes	yes	561238
afg1lb	ENSDARG00000042902	yes	yes	yes	555926
afg3l2	ENSDARG00000062272	yes	yes	yes	569168
afmid	ENSDARG00000099106	yes	yes	yes	550372
afp4	ENSDARG00000041490	yes	yes	yes	568656
afp4	ENSDARG00000095863	yes	yes	yes	568707
aftpha	ENSDARG00000069249	yes	yes	yes	556043
aftphb	ENSDARG00000071347	yes	yes	yes	100004990
aga	ENSDARG00000004889	yes	yes	yes	566517
agap1	ENSDARG00000062123	yes	yes	yes	100148154
agap2	ENSDARG00000099874	yes	yes	yes	565109
agap3	ENSDARG00000087822	yes	yes	no	324332
AGBL1	ENSDARG00000104384	yes	yes	yes	100536841
agbl2	ENSDARG00000079983	yes	yes	yes	568152
agbl4	ENSDARG00000110838	yes	yes	no
agbl4	ENSDARG00000068050	yes	yes	yes	550450
agbl5	ENSDARG00000045900	yes	yes	yes	445479
agfg1a	ENSDARG00000030020	yes	yes	yes	327597
agfg1b	ENSDARG00000019526	yes	yes	yes	393560
aggf1	ENSDARG00000060109	yes	yes	yes	559905
agk	ENSDARG00000009837	yes	yes	yes	334270
agla	ENSDARG00000103811	yes	yes	yes	567798
aglb	ENSDARG00000100352	yes	yes	yes	553352
agmat	ENSDARG00000059700	yes	yes	yes	556522
agmo	ENSDARG00000025595	yes	yes	yes	405819
ago1	ENSDARG00000092644	yes	yes	yes	570775
ago2	ENSDARG00000061268	yes	yes	yes	570630
ago3a	ENSDARG00000059888	yes	yes	yes	567622
ago3b	ENSDARG00000063079	yes	yes	yes	568159
ago4	ENSDARG00000100854	yes	yes	yes	100535764
agpat2	ENSDARG00000101139	yes	yes	yes	777624
agpat3	ENSDARG00000036549	yes	yes	yes	406734
agpat4	ENSDARG00000069044	yes	yes	yes	406265
agpat5	ENSDARG00000063187	yes	yes	yes	767778
agpat9l	ENSDARG00000006491	yes	yes	yes	567414
agps	ENSDARG00000042821	yes	yes	yes	386801
agr1	ENSDARG00000060682	yes	yes	yes	335309
agr2	ENSDARG00000070480	yes	yes	yes	335616
agrn	ENSDARG00000079388	yes	yes	yes	565373
agrp	ENSDARG00000069089	yes	yes	yes	100149042
agt	ENSDARG00000016412	yes	yes	yes	322485
agtpbp1	ENSDARG00000105214	yes	yes	yes	554164
agtr1a	ENSDARG00000018616	yes	yes	no	794575
agtr1b	ENSDARG00000045443	yes	yes	yes	100333455
agtr2	ENSDARG00000035552	yes	yes	yes	503772
agtrap	ENSDARG00000077082	yes	yes	yes	793937
agxt2	ENSDARG00000100709	yes	yes	yes	619269
agxta	ENSDARG00000052099	yes	yes	yes	436603
agxtb	ENSDARG00000018478	yes	yes	yes	79378
ahctf1	ENSDARG00000077530	yes	yes	yes	553494
ahcy	ENSDARG00000005191	yes	yes	yes	387530
ahcyl1	ENSDARG00000056331	yes	yes	yes	798918
ahcyl2	ENSDARG00000039343	yes	yes	yes	394240
ahdc1	ENSDARG00000093453	yes	yes	yes	100536210
ahi1	ENSDARG00000044056	yes	yes	yes	562701
ahnak	ENSDARG00000061764	yes	yes	yes	559276
ahr1a	ENSDARG00000020046	yes	yes	yes	246224
ahr1b	ENSDARG00000023537	yes	yes	yes	554265
ahr2	ENSDARG00000021833	yes	yes	yes	30517
ahrra	ENSDARG00000099702	yes	yes	no	641291
ahrrb	ENSDARG00000052618	yes	yes	yes	565319
ahsa1a	ENSDARG00000028664	yes	yes	yes	565968
ahsa1b	ENSDARG00000100317	yes	yes	yes	321945
ahsg1	ENSDARG00000026764	yes	yes	yes	569558
ahsg2	ENSDARG00000069293	yes	yes	yes	567406
aicda	ENSDARG00000015734	yes	yes	yes	493784
aida	ENSDARG00000014532	yes	yes	yes	393763
aif1l	ENSDARG00000009336	yes	yes	yes	321033
aifm1	ENSDARG00000058088	yes	yes	yes	373125
aifm2	ENSDARG00000077549	yes	yes	yes	557507
aifm3	ENSDARG00000062780	yes	yes	no	100150876
aifm4	ENSDARG00000061634	yes	yes	yes	791218
aifm5	ENSDARG00000075551	yes	yes	yes	557064
aig1	ENSDARG00000007171	yes	yes	yes	562261
aimp1	ENSDARG00000060036	yes	yes	yes	562232
aimp2	ENSDARG00000018903	yes	yes	yes	406647
aip	ENSDARG00000104437	yes	yes	yes	334795
aipl1	ENSDARG00000075067	yes	yes	yes	100537095
aipl2	ENSDARG00000098164	yes	no	no	100534741
aire	ENSDARG00000056784	yes	yes	yes	100007662
ajap1	ENSDARG00000038655	yes	yes	yes	101887016
ajuba	ENSDARG00000077842	yes	yes	yes	572549
ak1	ENSDARG00000001950	yes	yes	no	445486
ak2	ENSDARG00000005926	yes	yes	yes	321793
ak3	ENSDARG00000058226	yes	yes	yes	406404
ak4	ENSDARG00000006546	yes	yes	yes	406590
ak5	ENSDARG00000012555	yes	yes	yes	100003595
ak5l	ENSDARG00000017739	yes	yes	yes	548336
AK6	ENSDARG00000035573	yes	yes	yes	415208
ak7a	ENSDARG00000019001	yes	yes	yes	402854
ak7b	ENSDARG00000017023	yes	yes	yes	504040
ak8	ENSDARG00000030961	yes	yes	yes	553671
ak9	ENSDARG00000021913	yes	yes	yes	557708
akap10	ENSDARG00000059549	yes	yes	no	566920
akap11	ENSDARG00000075435	yes	yes	yes	558595
akap12a	ENSDARG00000091792	yes	yes	yes	101885554
akap12b	ENSDARG00000055678	yes	yes	yes	567365
akap17a	ENSDARG00000104768	yes	yes	yes	393655
akap1a	ENSDARG00000089802	yes	yes	yes	100002545
akap1b	ENSDARG00000006062	yes	yes	yes	556208
akap6	ENSDARG00000077295	yes	yes	yes	100002625
akap7	ENSDARG00000043843	yes	yes	yes
akap8l	ENSDARG00000099635	yes	yes	yes	406500
akap9	ENSDARG00000079610	yes	yes	yes	565037
akip1	ENSDARG00000069037	yes	yes	yes	562301
akirin1	ENSDARG00000039969	yes	yes	yes	406432
akirin2	ENSDARG00000058729	yes	yes	yes	406855
akna	ENSDARG00000087110	yes	yes	yes	556113
aknad1	ENSDARG00000094414	yes	yes	yes
akr1a1a	ENSDARG00000035257	yes	yes	yes	445326
akr1a1b	ENSDARG00000052030	yes	yes	yes	799805
akr1b1	ENSDARG00000006215	yes	yes	yes	415138
akr7a3	ENSDARG00000016649	yes	yes	yes	436642
akt1	ENSDARG00000099657	yes	yes	no
akt1s1	ENSDARG00000074667	yes	yes	yes	566559
akt2	ENSDARG00000011219	yes	yes	yes	378972
akt2l	ENSDARG00000103612	yes	yes	yes	403146
akt3a	ENSDARG00000104810	yes	yes	yes	560549
akt3b	ENSDARG00000087205	yes	yes	yes	100149794
aktip	ENSDARG00000026862	yes	yes	yes	378716
AL590134.1	ENSDARG00000095161	no	no	no
AL590145.1	ENSDARG00000095967	no	no	no
AL590146.1	ENSDARG00000095368	no	no	no
AL590149.1	ENSDARG00000012581	no	no	no
AL590150.1	ENSDARG00000092341	no	no	no
AL590151.1	ENSDARG00000053570	no	no	no	368435
AL590151.2	ENSDARG00000105320	no	no	no	103908760
AL590152.1	ENSDARG00000110696	no	no	no
AL627088.1	ENSDARG00000095600	no	no	no
AL627126.1	ENSDARG00000117804	no	no	no
AL627164.1	ENSDARG00000114588	yes	no	no
AL627258.1	ENSDARG00000096309	no	no	no
AL627305.1	ENSDARG00000100324	yes	yes	yes	572670
AL627305.2	ENSDARG00000101832	no	no	no
AL627305.3	ENSDARG00000102019	no	no	no
AL645691.1	ENSDARG00000102561	yes	yes	no	100536867
AL645691.2	ENSDARG00000102716	no	no	no
AL645792.1	ENSDARG00000103274	no	no	no
AL645792.2	ENSDARG00000103788	no	no	no	101883946
AL732488.1	ENSDARG00000096717	no	no	no	110438942
AL732515.1	ENSDARG00000095199	no	no	no
AL732567.1	ENSDARG00000102957	no	no	no
AL732629.1	ENSDARG00000104366	no	no	no
AL772146.1	ENSDARG00000105715	no	no	no
AL772146.2	ENSDARG00000105823	no	no	no
AL772219.1	ENSDARG00000117701	no	no	no
AL772241.1	ENSDARG00000110792	yes	yes	no
AL772298.1	ENSDARG00000089005	no	no	no
AL772298.2	ENSDARG00000103719	no	no	no
AL772298.3	ENSDARG00000117343	no	no	no
AL772300.1	ENSDARG00000097343	no	no	no
AL772300.2	ENSDARG00000117344	no	no	no
AL772314.1	ENSDARG00000097492	no	no	no
AL772362.1	ENSDARG00000097552	no	no	no
AL772373.1	ENSDARG00000117427	no	no	no
AL772382.1	ENSDARG00000097122	no	no	no
AL773558.1	ENSDARG00000098223	no	no	no
AL805905.1	ENSDARG00000117732	no	no	no
AL807389.1	ENSDARG00000094169	no	no	no
AL807749.1	ENSDARG00000095989	no	no	no
AL807749.2	ENSDARG00000117785	no	no	no
AL807792.1	ENSDARG00000096836	no	no	no
AL808121.1	ENSDARG00000097213	no	no	no
AL808129.1	ENSDARG00000097262	no	no	no
AL808129.2	ENSDARG00000112428	yes	yes	no
AL831726.1	ENSDARG00000086880	yes	yes	no
AL831726.2	ENSDARG00000104185	yes	yes	no	101882696
AL831726.3	ENSDARG00000117226	no	no	no
AL831745.1	ENSDARG00000039423	no	no	no	368914
AL831745.2	ENSDARG00000094022	no	no	no	110440182
AL831745.3	ENSDARG00000101436	no	no	no
AL831768.1	ENSDARG00000100923	yes	yes	no	100534861
AL833789.1	ENSDARG00000096811	no	no	no
AL840638.1	ENSDARG00000098608	no	no	no
AL840638.2	ENSDARG00000114350	yes	yes	no
AL844141.1	ENSDARG00000096964	no	no	no
AL844172.1	ENSDARG00000113841	yes	no	no	559910
AL844185.1	ENSDARG00000095868	yes	yes	yes
AL844186.1	ENSDARG00000114351	yes	yes	no
AL844192.1	ENSDARG00000100356	no	no	no
AL844518.1	ENSDARG00000111211	yes	yes	yes	100150820
AL844563.1	ENSDARG00000099436	no	no	no
AL845295.1	ENSDARG00000096435	no	no	no
AL845295.2	ENSDARG00000096472	no	no	no
AL845306.1	ENSDARG00000095211	no	no	no
AL845312.1	ENSDARG00000093679	no	no	no
AL845320.1	ENSDARG00000092847	no	no	no
AL845320.2	ENSDARG00000114981	yes	yes	yes
AL845324.1	ENSDARG00000023609	no	no	no
AL845324.2	ENSDARG00000095680	no	no	no
AL845330.1	ENSDARG00000108467	yes	yes	yes	796214
AL845357.1	ENSDARG00000097796	no	no	no
AL845362.1	ENSDARG00000093205	no	no	no
AL845365.1	ENSDARG00000096673	no	no	no
AL845369.1	ENSDARG00000092683	no	no	no
AL845369.2	ENSDARG00000095523	no	no	no
AL845419.1	ENSDARG00000095869	no	no	no
AL845428.1	ENSDARG00000041007	no	no	no	101883115
AL845428.2	ENSDARG00000105758	no	no	no
AL845428.3	ENSDARG00000105766	no	no	no
AL845435.1	ENSDARG00000097029	no	no	no
AL845550.1	ENSDARG00000097342	no	no	no	101882890
AL928650.1	ENSDARG00000079332	no	no	no	101883376
AL928650.2	ENSDARG00000096526	no	no	no
AL928650.3	ENSDARG00000096599	no	no	no	103911855
AL928650.4	ENSDARG00000113858	yes	yes	no
AL928657.1	ENSDARG00000097119	no	no	no
AL928657.2	ENSDARG00000116912	yes	yes	no
AL928685.1	ENSDARG00000095786	no	no	no
AL928685.2	ENSDARG00000095907	no	no	no	555502
AL928685.3	ENSDARG00000115371	yes	yes	no
AL928685.4	ENSDARG00000115582	yes	no	no
AL928707.1	ENSDARG00000098023	no	no	no
AL928707.2	ENSDARG00000098039	no	no	no
AL928707.3	ENSDARG00000117700	no	no	no
AL928714.1	ENSDARG00000117452	no	no	no
AL928716.1	ENSDARG00000096695	no	no	no
AL928724.1	ENSDARG00000097525	no	no	no
AL928725.1	ENSDARG00000095778	no	no	no
AL928808.1	ENSDARG00000101333	yes	yes	yes
AL928824.1	ENSDARG00000094456	no	no	no
AL928824.2	ENSDARG00000096744	no	no	no
AL928824.3	ENSDARG00000096753	no	no	no
AL928835.1	ENSDARG00000096583	no	no	no
AL928845.1	ENSDARG00000093227	no	no	no
AL928851.1	ENSDARG00000105765	no	no	no
AL928854.1	ENSDARG00000105454	no	no	no
AL928866.1	ENSDARG00000095266	no	no	no
AL928866.2	ENSDARG00000117398	no	no	no
AL928870.1	ENSDARG00000097413	no	no	no
AL928875.1	ENSDARG00000112810	yes	no	no
AL928881.1	ENSDARG00000106022	no	no	no
AL928908.1	ENSDARG00000097437	no	no	no
AL928908.2	ENSDARG00000097490	no	no	no
AL928908.3	ENSDARG00000097636	no	no	no
AL928920.1	ENSDARG00000094567	no	no	no
AL928920.2	ENSDARG00000096699	no	no	no
AL928920.3	ENSDARG00000096778	no	no	no
AL928920.4	ENSDARG00000096812	no	no	no
AL928927.1	ENSDARG00000097107	no	no	no
AL928951.1	ENSDARG00000102544	no	no	no
AL928977.1	ENSDARG00000094655	no	no	no
AL929009.1	ENSDARG00000096446	no	no	no
AL929009.2	ENSDARG00000113148	yes	no	no
AL929017.1	ENSDARG00000074868	no	no	no	100170822
AL929017.2	ENSDARG00000095449	no	no	no
AL929023.1	ENSDARG00000114152	yes	no	no
AL929028.1	ENSDARG00000105095	yes	yes	yes
AL929032.1	ENSDARG00000094960	no	no	no	795984
AL929048.1	ENSDARG00000117298	no	no	no
AL929057.1	ENSDARG00000103165	no	no	no
AL929058.1	ENSDARG00000092980	no	no	no	110438186
AL929092.1	ENSDARG00000092217	no	no	no
AL929105.1	ENSDARG00000105194	no	no	no
AL929114.1	ENSDARG00000100085	no	no	no
AL929114.2	ENSDARG00000101825	no	no	no
AL929171.1	ENSDARG00000095920	no	no	no	110439353
AL929182.1	ENSDARG00000097384	no	no	no
AL929192.1	ENSDARG00000106684	yes	yes	yes
AL929208.1	ENSDARG00000105788	yes	yes	yes	101885386
AL929210.1	ENSDARG00000094943	no	no	no
AL929210.2	ENSDARG00000117295	no	no	no
AL929216.1	ENSDARG00000117377	no	no	no
AL929217.1	ENSDARG00000059891	yes	yes	no	562831
AL929220.1	ENSDARG00000103323	no	no	no
AL929222.1	ENSDARG00000096994	no	no	no
AL929222.2	ENSDARG00000097738	no	no	no
AL929229.1	ENSDARG00000091975	no	no	no
AL929237.1	ENSDARG00000094104	no	no	no	100536429
AL929237.2	ENSDARG00000095450	no	no	no
AL929237.3	ENSDARG00000096676	no	no	no	103909355
AL929237.4	ENSDARG00000110265	yes	yes	no
AL929243.1	ENSDARG00000096290	no	no	no
AL929266.1	ENSDARG00000092279	no	no	no
AL929276.1	ENSDARG00000113065	yes	yes	yes
AL929276.2	ENSDARG00000116984	yes	no	yes
AL929294.1	ENSDARG00000117323	no	no	no
AL929304.1	ENSDARG00000105264	no	no	no
AL929305.1	ENSDARG00000110179	yes	no	no
AL929307.1	ENSDARG00000105542	no	no	no
AL929309.1	ENSDARG00000097916	no	no	no
AL929315.1	ENSDARG00000092557	no	no	no
AL929321.1	ENSDARG00000093953	no	no	no
AL929321.2	ENSDARG00000105750	no	no	no
AL929321.3	ENSDARG00000105774	no	no	no
AL929321.4	ENSDARG00000105821	no	no	no
AL929334.1	ENSDARG00000111496	yes	no	no
AL929345.1	ENSDARG00000113113	yes	yes	no
AL929349.1	ENSDARG00000096520	no	no	no
AL929378.1	ENSDARG00000117372	no	no	no
AL929396.1	ENSDARG00000096530	no	no	no
AL929435.1	ENSDARG00000097234	no	no	no
AL929435.2	ENSDARG00000111953	yes	yes	no
AL929453.1	ENSDARG00000115950	yes	no	no
AL929457.1	ENSDARG00000095483	no	no	no
AL929457.2	ENSDARG00000098067	no	no	no
AL929493.1	ENSDARG00000093575	no	no	no
AL929493.2	ENSDARG00000117535	no	no	no
AL929520.1	ENSDARG00000094448	no	no	no
AL929520.2	ENSDARG00000095426	no	no	no
AL929520.3	ENSDARG00000115525	yes	no	no
AL929523.1	ENSDARG00000098006	no	no	no
AL929536.3	ENSDARG00000113274	yes	yes	no
AL929536.5	ENSDARG00000115762	yes	yes	no
AL929536.6	ENSDARG00000117000	yes	yes	no
AL929576.1	ENSDARG00000095566	no	no	no
AL929586.1	ENSDARG00000098634	no	no	no
AL935044.1	ENSDARG00000088051	yes	yes	no	100537716
AL935044.2	ENSDARG00000100113	yes	no	yes
AL935044.3	ENSDARG00000104428	no	no	no	564387
AL935044.4	ENSDARG00000104677	no	no	no
AL935053.1	ENSDARG00000105513	no	no	no
AL935065.1	ENSDARG00000099693	yes	yes	yes	567472
AL935115.1	ENSDARG00000097120	no	no	no
AL935117.1	ENSDARG00000095204	no	no	no
AL935126.1	ENSDARG00000102528	no	no	no
AL935126.2	ENSDARG00000111309	yes	yes	no
AL935144.1	ENSDARG00000093040	no	no	no
AL935145.1	ENSDARG00000096400	no	no	no
AL935145.2	ENSDARG00000097045	no	no	no
AL935153.1	ENSDARG00000092042	no	no	no
AL935166.1	ENSDARG00000095991	no	no	no
AL935174.2	ENSDARG00000112088	yes	yes	no
AL935174.3	ENSDARG00000115129	yes	yes	no
AL935174.5	ENSDARG00000117464	no	no	no	563381
AL935183.1	ENSDARG00000094023	no	no	no
AL935184.1	ENSDARG00000070039	no	no	no
AL935184.2	ENSDARG00000095408	no	no	no
AL935186.1	ENSDARG00000025046	yes	yes	yes
AL935186.10	ENSDARG00000115988	yes	yes	no
AL935186.2	ENSDARG00000097345	no	no	no
AL935186.6	ENSDARG00000112275	yes	yes	no
AL935186.8	ENSDARG00000113671	yes	yes	no
AL935186.9	ENSDARG00000115978	yes	yes	no
AL935195.1	ENSDARG00000110728	yes	no	no
AL935198.1	ENSDARG00000092975	no	no	no
AL935198.2	ENSDARG00000094622	no	no	no	101885999
AL935199.1	ENSDARG00000077746	yes	yes	no	100001479
AL935269.1	ENSDARG00000117790	no	no	no
AL935279.1	ENSDARG00000071407	no	no	no
AL935292.1	ENSDARG00000115053	yes	no	no
AL935294.1	ENSDARG00000100218	no	no	no
AL935294.2	ENSDARG00000104739	no	no	no
AL935295.1	ENSDARG00000092636	no	no	no	110438847
AL935295.2	ENSDARG00000117663	no	no	no
AL935299.1	ENSDARG00000116807	yes	no	no
AL935300.1	ENSDARG00000094367	no	no	no
AL935300.2	ENSDARG00000097519	no	no	no
AL935300.3	ENSDARG00000098661	yes	yes	no	101885450
AL935303.1	ENSDARG00000105171	no	no	no
AL935322.1	ENSDARG00000117301	no	no	no
AL935334.1	ENSDARG00000117676	no	no	no
AL953841.1	ENSDARG00000094566	no	no	no
AL953841.2	ENSDARG00000103121	no	no	no
AL953848.1	ENSDARG00000106768	no	no	no
AL953848.2	ENSDARG00000117585	no	no	no
AL953855.1	ENSDARG00000095108	no	no	no
AL953858.1	ENSDARG00000100195	yes	yes	yes
AL953865.1	ENSDARG00000109438	yes	no	no
AL953866.1	ENSDARG00000096884	no	no	no
AL953867.1	ENSDARG00000070885	no	no	no
AL953867.2	ENSDARG00000095689	no	no	no
AL953875.1	ENSDARG00000117502	no	no	no
AL953886.1	ENSDARG00000101745	no	no	no
AL953886.2	ENSDARG00000104298	no	no	no
AL953893.1	ENSDARG00000091894	no	no	no
AL953894.1	ENSDARG00000093393	no	no	no
AL953896.1	ENSDARG00000092472	no	no	no
AL953903.1	ENSDARG00000095012	no	no	no
AL953903.2	ENSDARG00000095151	no	no	no
AL953903.3	ENSDARG00000095736	no	no	no
AL953907.1	ENSDARG00000094823	no	no	no
AL953907.2	ENSDARG00000113960	yes	yes	yes
AL953910.1	ENSDARG00000103508	no	no	no
AL954129.1	ENSDARG00000105524	no	no	no	103911374
AL954134.1	ENSDARG00000092078	no	no	no	110438025
AL954134.2	ENSDARG00000092679	no	no	no
AL954137.1	ENSDARG00000110662	yes	yes	no
AL954137.2	ENSDARG00000114408	yes	no	no
AL954138.1	ENSDARG00000117322	no	no	no
AL954142.1	ENSDARG00000092288	no	no	no	564963
AL954142.2	ENSDARG00000095277	no	no	no
AL954142.3	ENSDARG00000117430	no	no	no
AL954145.1	ENSDARG00000094110	no	no	no
AL954145.2	ENSDARG00000117560	no	no	no
AL954146.1	ENSDARG00000038891	yes	yes	no	560023
AL954149.1	ENSDARG00000094070	no	no	no
AL954149.2	ENSDARG00000094185	no	no	no
AL954187.1	ENSDARG00000096642	no	no	no
AL954191.1	ENSDARG00000117407	no	no	no	101885516
AL954317.1	ENSDARG00000095834	no	no	no
AL954320.1	ENSDARG00000092905	no	no	no
AL954322.1	ENSDARG00000096918	no	no	no
AL954322.2	ENSDARG00000097072	no	no	no	101882098
AL954322.3	ENSDARG00000097266	no	no	no	101886962
AL954327.1	ENSDARG00000091368	no	no	no	567978
AL954359.1	ENSDARG00000093646	no	no	no	103911997
AL954359.2	ENSDARG00000094423	no	no	no	103911998
AL954361.1	ENSDARG00000078364	yes	yes	no	570571
AL954387.1	ENSDARG00000097221	no	no	no
AL954655.1	ENSDARG00000052626	no	no	no
AL954655.2	ENSDARG00000092719	no	no	no
AL954666.1	ENSDARG00000097918	no	no	no
AL954669.1	ENSDARG00000097096	no	no	no
AL954672.1	ENSDARG00000105627	no	no	no
AL954682.1	ENSDARG00000112674	yes	yes	no
AL954694.1	ENSDARG00000092131	no	no	no
AL954694.2	ENSDARG00000093270	no	no	no
AL954695.1	ENSDARG00000053731	no	no	no
AL954695.2	ENSDARG00000079925	no	no	no
AL954695.3	ENSDARG00000094127	no	no	no
AL954696.1	ENSDARG00000078442	yes	yes	yes	100332577
AL954696.2	ENSDARG00000117348	no	no	no
AL954698.1	ENSDARG00000098202	no	no	no
AL954698.2	ENSDARG00000102132	no	no	no
AL954703.1	ENSDARG00000117314	no	no	no
AL954741.1	ENSDARG00000099302	no	no	no
AL954741.2	ENSDARG00000115737	yes	yes	yes
AL954767.1	ENSDARG00000094503	no	no	no
AL954816.1	ENSDARG00000095144	no	no	no
AL954831.1	ENSDARG00000097701	no	no	no
AL954832.1	ENSDARG00000117648	no	no	no
AL954848.1	ENSDARG00000110404	yes	no	no
AL954861.1	ENSDARG00000097547	no	no	no
AL954861.2	ENSDARG00000099370	yes	yes	yes
AL954868.1	ENSDARG00000093641	no	no	no	110440015
alad	ENSDARG00000100372	yes	yes	yes	550338
alas1	ENSDARG00000021059	yes	yes	yes	64608
alas2	ENSDARG00000038643	yes	yes	yes	64607
alcama	ENSDARG00000026531	yes	yes	yes	30194
alcamb	ENSDARG00000058538	yes	yes	yes	323919
aldh16a1	ENSDARG00000037935	yes	yes	yes	492710
aldh18a1	ENSDARG00000099579	yes	yes	yes	557186
aldh1a2	ENSDARG00000053493	yes	yes	yes	116713
aldh1a3	ENSDARG00000076933	yes	yes	yes	751785
aldh1l1	ENSDARG00000077004	yes	yes	yes	100526683
aldh1l2	ENSDARG00000070230	yes	yes	yes	100333269
aldh2.1	ENSDARG00000089924	yes	yes	yes	393462
aldh2.2	ENSDARG00000028087	yes	yes	yes	368239
aldh3a1	ENSDARG00000074791	yes	yes	yes	100000026
aldh3a2a	ENSDARG00000028259	yes	yes	yes	323653
aldh3a2b	ENSDARG00000029381	yes	yes	yes	447920
aldh3b1	ENSDARG00000013839	yes	yes	yes	282559
aldh3b2	ENSDARG00000035606	yes	yes	no	557008
aldh4a1	ENSDARG00000038207	yes	yes	yes	394133
aldh5a1	ENSDARG00000076544	yes	yes	yes	565235
aldh6a1	ENSDARG00000053485	yes	yes	yes	436647
aldh7a1	ENSDARG00000018426	yes	yes	yes	334197
aldh8a1	ENSDARG00000036776	yes	yes	yes	447801
aldh9a1a.1	ENSDARG00000069100	yes	yes	yes	100005587
aldh9a1a.2	ENSDARG00000055331	yes	yes	yes	100006238
aldh9a1b	ENSDARG00000037061	yes	yes	yes	399481
aldoaa	ENSDARG00000011665	yes	yes	yes	336425
aldoab	ENSDARG00000034470	yes	yes	yes	406496
aldob	ENSDARG00000053684	yes	yes	yes	321664
aldoca	ENSDARG00000057661	yes	yes	yes	792692
aldocb	ENSDARG00000019702	yes	yes	yes	369193
alg1	ENSDARG00000054963	yes	yes	yes	334161
alg10	ENSDARG00000053917	yes	yes	yes	100331575
alg11	ENSDARG00000031202	yes	yes	yes	407614
alg12	ENSDARG00000041199	yes	yes	yes	569494
alg13	ENSDARG00000054374	yes	yes	yes	557181
alg14	ENSDARG00000103093	yes	yes	yes	450072
alg2	ENSDARG00000070399	yes	yes	yes	403068
alg3	ENSDARG00000053155	yes	yes	yes	553725
alg5	ENSDARG00000021938	yes	yes	yes	445564
alg5	ENSDARG00000061235	yes	yes	yes	751635
alg6	ENSDARG00000017617	yes	yes	yes	445327
alg8	ENSDARG00000044627	yes	yes	yes	327601
alg9	ENSDARG00000012840	yes	yes	yes	393598
alk	ENSDARG00000095833	yes	yes	yes	563509
alkal1	ENSDARG00000074387	yes	yes	yes	100535009
alkal2a	ENSDARG00000091073	yes	yes	yes
alkal2b	ENSDARG00000042815	yes	yes	yes	100329254
alkbh1	ENSDARG00000071164	yes	yes	yes	553720
alkbh2	ENSDARG00000059856	yes	yes	yes	569291
alkbh3	ENSDARG00000045606	yes	yes	yes	792266
alkbh3	ENSDARG00000097208	yes	yes	yes	100330987
alkbh4	ENSDARG00000052247	yes	yes	yes	553475
alkbh5	ENSDARG00000063003	yes	yes	yes	570158
alkbh6	ENSDARG00000077253	yes	yes	yes	317736
alkbh7	ENSDARG00000037906	yes	yes	yes	550272
alkbh8	ENSDARG00000060256	yes	yes	yes	556362
allc	ENSDARG00000042562	yes	yes	yes	436989
alms1	ENSDARG00000074779	yes	yes	yes	561882
alox12	ENSDARG00000069463	yes	yes	yes	322732
alox5a	ENSDARG00000057273	yes	yes	no	567204
alox5ap	ENSDARG00000054755	yes	yes	yes	337376
alox5b.1	ENSDARG00000043085	yes	yes	yes	573013
alox5b.2	ENSDARG00000043089	yes	yes	yes	724056
alox5b.3	ENSDARG00000069966	yes	yes	yes	553602
ALOXE3	ENSDARG00000073781	yes	yes	no	794132
alp3	ENSDARG00000098063	yes	yes	no	100330410
alpi.1	ENSDARG00000015273	yes	yes	yes	541539
alpi.2	ENSDARG00000053774	yes	yes	yes	574009
alpk2	ENSDARG00000079637	yes	yes	yes	559835
alpk3a	ENSDARG00000078989	yes	yes	yes	100321139
alpk3b	ENSDARG00000105630	yes	yes	yes	100534893
alpl	ENSDARG00000015546	yes	yes	yes	393982
als2a	ENSDARG00000075111	yes	yes	no	557014
als2b	ENSDARG00000076924	yes	yes	yes	100318899
alx1	ENSDARG00000062824	yes	yes	no	565176
alx4a	ENSDARG00000088332	yes	yes	yes	100006399
alx4b	ENSDARG00000074442	yes	yes	yes	497424
alyref	ENSDARG00000077732	yes	yes	yes	560127
amacr	ENSDARG00000057435	yes	yes	yes	553653
ambn	ENSDARG00000075598	yes	yes	yes	100001700
ambp	ENSDARG00000004296	yes	yes	yes	394093
ambra1a	ENSDARG00000008322	yes	yes	yes	100332642
ambra1b	ENSDARG00000039878	yes	yes	yes	559106
amd1	ENSDARG00000043856	yes	yes	yes	792097
AMDHD1	ENSDARG00000007366	yes	yes	yes	402826
amdhd2	ENSDARG00000100376	yes	yes	yes	402981
amer1	ENSDARG00000079624	yes	yes	yes	100885784
amer2	ENSDARG00000075222	yes	yes	yes	100101649
amfra	ENSDARG00000020218	yes	yes	yes	406442
amfrb	ENSDARG00000105578	yes	yes	yes	101884807
amh	ENSDARG00000014357	yes	yes	yes	493624
amigo1	ENSDARG00000079620	yes	no	no	100144409
amigo3	ENSDARG00000074469	yes	yes	no	100000131
ammecr1	ENSDARG00000012892	yes	yes	yes	393553
amn	ENSDARG00000062947	yes	yes	yes	793454
amn1	ENSDARG00000070478	yes	yes	yes	751744
amot	ENSDARG00000078335	yes	yes	yes	563421
amotl2a	ENSDARG00000061923	yes	yes	yes	558920
amotl2b	ENSDARG00000061948	yes	yes	yes	559784
ampd1	ENSDARG00000033832	yes	yes	yes	393867
ampd2a	ENSDARG00000104491	yes	yes	no	100330772
ampd2b	ENSDARG00000029952	yes	yes	yes	571355
ampd3a	ENSDARG00000005800	yes	yes	yes	556578
ampd3b	ENSDARG00000032469	yes	yes	yes	333997
amph	ENSDARG00000007663	yes	yes	yes	393804
amt	ENSDARG00000010862	yes	yes	yes	450000
amy2a	ENSDARG00000013856	yes	yes	yes	406539
anapc1	ENSDARG00000075687	yes	yes	yes	568795
anapc10	ENSDARG00000090152	yes	yes	yes	798352
anapc11	ENSDARG00000102531	yes	yes	yes	768140
anapc13	ENSDARG00000078435	yes	yes	yes	569473
anapc15	ENSDARG00000101285	yes	yes	yes	751740
anapc16	ENSDARG00000013822	yes	yes	yes	550576
anapc2	ENSDARG00000105035	yes	yes	yes	100318335
anapc4	ENSDARG00000032237	yes	yes	yes	494046
anapc5	ENSDARG00000008461	yes	yes	yes	322854
anapc7	ENSDARG00000063005	yes	yes	yes	558402
and1	ENSDARG00000088514	yes	yes	yes	794315
and2	ENSDARG00000079302	yes	yes	yes	566702
and3	ENSDARG00000056873	yes	yes	yes	561047
angel1	ENSDARG00000077567	yes	yes	yes	569547
angel2	ENSDARG00000016743	yes	yes	yes	562704
angpt1	ENSDARG00000030364	yes	yes	yes	114407
angpt2a	ENSDARG00000014946	yes	yes	no	101101687
angpt2b	ENSDARG00000053906	yes	yes	no	114408
angpt4	ENSDARG00000076787	yes	yes	yes	571050
angptl1a	ENSDARG00000012071	yes	yes	yes	544656
angptl1b	ENSDARG00000100159	yes	yes	yes	334311
angptl2a	ENSDARG00000024030	yes	yes	yes	569092
angptl2b	ENSDARG00000068369	yes	yes	yes	503514
angptl3	ENSDARG00000044365	yes	yes	yes	114421
angptl4	ENSDARG00000035859	yes	yes	yes	492647
angptl5	ENSDARG00000056630	yes	yes	yes	566212
angptl6	ENSDARG00000020265	yes	yes	yes	561927
angptl7	ENSDARG00000027582	yes	yes	yes	450053
ank1a	ENSDARG00000059093	yes	yes	yes	449796
ank1a	ENSDARG00000092143	yes	yes	yes	449796
ank1b	ENSDARG00000074777	yes	yes	yes	797662
ank2a	ENSDARG00000009026	yes	yes	no	568926
ank2b	ENSDARG00000043313	yes	yes	yes	450043
ank3a	ENSDARG00000061736	yes	yes	yes	103909035
ank3b	ENSDARG00000110151	yes	yes	yes
ank3b	ENSDARG00000077582	yes	yes	no
ankar	ENSDARG00000000516	yes	yes	yes	368636
ankdd1a	ENSDARG00000098647	yes	yes	yes	569271
ankdd1b	ENSDARG00000025866	yes	yes	yes	562681
ankef1a	ENSDARG00000019135	yes	yes	yes	566413
ankef1b	ENSDARG00000060211	yes	yes	yes	100149106
ANKFN1	ENSDARG00000060941	yes	yes	yes	100333998
ankfy1	ENSDARG00000061013	yes	yes	yes	568480
ankha	ENSDARG00000071724	yes	yes	yes	571148
ankhb	ENSDARG00000014969	yes	yes	yes	323738
ankhd1	ENSDARG00000077860	yes	yes	yes	563327
ankib1a	ENSDARG00000060768	yes	yes	yes	566524
ankib1b	ENSDARG00000076829	yes	yes	yes	561277
ankk1	ENSDARG00000056921	yes	yes	yes	100170831
ankle2	ENSDARG00000035607	yes	yes	yes	559297
ankmy1	ENSDARG00000062702	yes	yes	yes	568987
ankmy2a	ENSDARG00000005948	yes	yes	yes	334389
ankmy2b	ENSDARG00000093668	yes	yes	no
ankra2	ENSDARG00000035399	yes	yes	yes	406403
ankrd10a	ENSDARG00000037100	yes	yes	yes	393955
ankrd10b	ENSDARG00000004771	yes	yes	yes	559527
ankrd11	ENSDARG00000051886	yes	yes	no	327352
ankrd12	ENSDARG00000052419	yes	yes	yes	393119
ankrd13a	ENSDARG00000061901	yes	yes	no	556837
ankrd13b	ENSDARG00000014652	yes	yes	yes	568981
ankrd13c	ENSDARG00000103831	yes	yes	yes	325167
ankrd13d	ENSDARG00000098140	yes	yes	yes	562931
ankrd16	ENSDARG00000003822	yes	yes	yes	550225
ankrd1a	ENSDARG00000075263	yes	yes	yes	100151027
ankrd1b	ENSDARG00000076192	yes	yes	yes	564159
ankrd2	ENSDARG00000002722	yes	no	no	101886079
ankrd22	ENSDARG00000002298	yes	yes	yes	393244
ankrd24	ENSDARG00000062103	yes	yes	yes	565326
ankrd27	ENSDARG00000089207	yes	yes	no	386887
ankrd28b	ENSDARG00000009023	yes	yes	yes	560747
ankrd29	ENSDARG00000057159	yes	yes	yes	553798
ankrd31	ENSDARG00000052731	yes	yes	yes	550610
ankrd33aa	ENSDARG00000055638	yes	no	no	557568
ankrd33ab	ENSDARG00000002508	yes	yes	yes	569518
ankrd33ba	ENSDARG00000058357	yes	yes	yes	568270
ankrd33bb	ENSDARG00000015589	yes	yes	no	557905
ankrd34ba	ENSDARG00000077086	yes	yes	no	560938
ankrd34bb	ENSDARG00000061641	yes	yes	no	565548
ankrd37	ENSDARG00000056376	yes	yes	yes	793783
ankrd39	ENSDARG00000041350	yes	yes	yes	100000333
ankrd40	ENSDARG00000076490	yes	yes	yes	100005118
ankrd44	ENSDARG00000026028	yes	yes	no	561373
ankrd45	ENSDARG00000011326	yes	yes	yes	553808
ankrd46a	ENSDARG00000044328	yes	yes	yes	100329397
ankrd46b	ENSDARG00000015780	yes	yes	yes	402888
ankrd49	ENSDARG00000023508	yes	yes	yes	550246
ANKRD50	ENSDARG00000045666	yes	yes	no
ankrd50l	ENSDARG00000007077	yes	yes	yes	449857
ankrd52a	ENSDARG00000036826	yes	yes	yes	553206
ankrd54	ENSDARG00000055743	yes	yes	yes	436851
ankrd55	ENSDARG00000099182	yes	yes	yes	100006755
ANKRD66	ENSDARG00000090489	yes	yes	yes	101886816
ankrd6a	ENSDARG00000057790	yes	yes	yes	100330565
ankrd6b	ENSDARG00000029370	yes	yes	yes	378477
ankrd9	ENSDARG00000028804	yes	yes	yes	492328
anks1aa	ENSDARG00000062396	yes	yes	no	100334911
anks1ab	ENSDARG00000078901	yes	yes	yes	100003659
anks1b	ENSDARG00000003512	yes	yes	yes	565408
anks3	ENSDARG00000038557	yes	yes	yes	100136846
anks4b	ENSDARG00000036846	yes	yes	yes	431735
ankzf1	ENSDARG00000041904	yes	yes	yes	553307
anln	ENSDARG00000060917	yes	yes	yes	562517
ano1	ENSDARG00000102335	yes	yes	no	407698
ano10a	ENSDARG00000057736	yes	yes	yes	566425
ano10b	ENSDARG00000018159	yes	yes	yes	565195
ano11	ENSDARG00000077327	yes	yes	yes	100007289
ANO2	ENSDARG00000003210	yes	yes	no
ano2	ENSDARG00000101363	yes	yes	yes	566373
ano3	ENSDARG00000058015	yes	yes	yes	553392
ano5a	ENSDARG00000015731	yes	yes	no	100534737
ano5b	ENSDARG00000036147	yes	yes	yes	560102
ano6	ENSDARG00000061544	yes	yes	yes	100535437
ANO7	ENSDARG00000104834	yes	yes	no	556876
ano8a	ENSDARG00000076265	yes	yes	no	562947
ano8b	ENSDARG00000077229	yes	yes	yes	562782
ano9a	ENSDARG00000076320	yes	yes	yes	562630
ano9a	ENSDARG00000078941	yes	yes	yes	100126106
ano9b	ENSDARG00000079324	yes	yes	yes	559809
anos1a	ENSDARG00000012896	yes	yes	yes	30630
anos1b	ENSDARG00000004932	yes	yes	yes	30652
anp32a	ENSDARG00000006487	yes	yes	yes	335907
anp32b	ENSDARG00000023330	yes	yes	yes	322000
anp32e	ENSDARG00000054804	yes	yes	yes	406562
ANPEP	ENSDARG00000097285	yes	yes	yes	100004744
anpepa	ENSDARG00000041083	yes	yes	yes	558452
anpepb	ENSDARG00000103878	yes	yes	yes	322533
antxr1a	ENSDARG00000025672	yes	yes	no	793153
antxr1b	ENSDARG00000074075	yes	yes	yes	556289
antxr1c	ENSDARG00000063612	yes	yes	yes	563907
antxr1d	ENSDARG00000060845	yes	yes	yes	563132
antxr2a	ENSDARG00000104118	yes	yes	yes	557239
antxr2b	ENSDARG00000063011	yes	yes	no	560841
ANXA1	ENSDARG00000098481	yes	yes	yes	550268
anxa11a	ENSDARG00000077383	yes	yes	yes	368215
anxa11b	ENSDARG00000002632	yes	yes	yes	353365
anxa13	ENSDARG00000013976	yes	yes	yes	81880
anxa13l	ENSDARG00000013613	yes	yes	yes	554118
anxa1a	ENSDARG00000026726	yes	yes	yes	334724
anxa1b	ENSDARG00000100095	yes	yes	yes	353358
anxa1c	ENSDARG00000104359	yes	yes	yes	494158
anxa2a	ENSDARG00000003216	yes	yes	yes	325557
anxa2b	ENSDARG00000053625	yes	yes	yes	799806
anxa3a	ENSDARG00000009196	yes	yes	yes	447893
anxa3b	ENSDARG00000044254	yes	yes	yes	492336
anxa4	ENSDARG00000036456	yes	yes	yes	353362
anxa5a	ENSDARG00000026406	yes	yes	yes	557578
anxa5b	ENSDARG00000016470	yes	yes	yes	337132
anxa6	ENSDARG00000013335	yes	yes	yes	353363
aoc1	ENSDARG00000061355	yes	yes	yes	555401
aoc2	ENSDARG00000014646	yes	yes	yes	541429
aox5	ENSDARG00000071475	yes	yes	yes	64265
aox6	ENSDARG00000020054	yes	yes	yes	570457
ap1ar	ENSDARG00000031496	yes	yes	yes	100332265
ap1b1	ENSDARG00000020621	yes	yes	yes	562166
ap1g1	ENSDARG00000102394	yes	yes	yes	324466
ap1g2	ENSDARG00000054337	yes	yes	yes	100007877
ap1m1	ENSDARG00000096249	yes	yes	yes	100330411
ap1m2	ENSDARG00000096454	yes	yes	yes	403021
ap1m3	ENSDARG00000039512	yes	yes	yes	445244
ap1s1	ENSDARG00000056803	yes	yes	yes	393279
ap1s2	ENSDARG00000058504	yes	yes	yes	327237
ap1s3a	ENSDARG00000110439	yes	yes	yes	550415
ap1s3b	ENSDARG00000027966	yes	yes	yes	447897
ap2a1	ENSDARG00000054320	yes	yes	yes	558153
ap2b1	ENSDARG00000035152	yes	yes	yes	334632
ap2m1a	ENSDARG00000002790	yes	yes	yes	321051
ap2m1b	ENSDARG00000033899	yes	yes	yes	394001
ap2s1	ENSDARG00000026967	yes	yes	yes	100148085
ap3b1a	ENSDARG00000100082	yes	yes	no	563316
AP3B2	ENSDARG00000105296	yes	yes	no	100000165
ap3d1	ENSDARG00000071424	yes	yes	yes	563359
ap3m1	ENSDARG00000029928	yes	yes	yes	266798
ap3m2	ENSDARG00000016128	yes	yes	yes	415244
ap3s2	ENSDARG00000039882	yes	yes	yes	436812
ap4b1	ENSDARG00000013726	yes	yes	yes	393309
ap4e1	ENSDARG00000103684	yes	yes	yes	570467
ap4m1	ENSDARG00000056871	yes	yes	yes	436945
ap4s1	ENSDARG00000054220	yes	yes	yes	368852
ap5b1	ENSDARG00000078805	yes	yes	yes	100148772
ap5m1	ENSDARG00000031533	yes	yes	yes	553681
ap5s1	ENSDARG00000076755	yes	yes	yes	556111
ap5z1	ENSDARG00000078111	yes	yes	no	100537934
apaf1	ENSDARG00000021239	yes	yes	yes	58131
apba1a	ENSDARG00000103848	yes	yes	yes	100003938
apba1b	ENSDARG00000074328	yes	yes	yes	565507
apba2a	ENSDARG00000063314	yes	yes	yes	100330365
apba2b	ENSDARG00000060639	yes	yes	yes	327160
APBA3	ENSDARG00000090675	yes	yes	yes	449850
apbb1	ENSDARG00000076560	yes	yes	yes	565164
apbb1ip	ENSDARG00000016505	yes	yes	yes	393607
apbb2b	ENSDARG00000099995	yes	yes	yes	564990
apbb3	ENSDARG00000053771	yes	yes	no	101883158
apc	ENSDARG00000058868	yes	yes	yes	386762
apc2	ENSDARG00000063007	yes	no	no	565771
apcdd1l	ENSDARG00000075557	yes	yes	yes	100001408
apeh	ENSDARG00000008703	yes	yes	no	100333019
apela	ENSDARG00000094729	yes	yes	yes	100536023
apex1	ENSDARG00000045843	yes	yes	yes	406730
apex2	ENSDARG00000008472	yes	yes	yes	393115
aph1b	ENSDARG00000005612	yes	yes	yes	386808
api5	ENSDARG00000033597	yes	yes	yes	321676
apip	ENSDARG00000003132	yes	yes	yes	447941
apln	ENSDARG00000053279	yes	yes	yes	798375
aplnr2	ENSDARG00000004447	yes	yes	yes	793710
aplnra	ENSDARG00000002172	yes	yes	yes	561935
aplnrb	ENSDARG00000036670	yes	yes	yes	565492
aplp1	ENSDARG00000098368	yes	yes	yes	404233
aplp2	ENSDARG00000054864	yes	yes	yes	796801
apmap	ENSDARG00000017422	yes	yes	yes	266637
apnl	ENSDARG00000090900	yes	yes	yes	100002992
apoa1a	ENSDARG00000012076	yes	yes	yes	30355
apoa1b	ENSDARG00000101324	yes	yes	yes	100101640
apoa2	ENSDARG00000015866	yes	yes	yes	322327
apoa4a	ENSDARG00000101160	yes	yes	yes	550608
apoa4b.1	ENSDARG00000040298	yes	yes	yes	322543
apoa4b.2	ENSDARG00000094929	yes	yes	yes	100004607
apoa4b.2	ENSDARG00000020866	yes	yes	yes	570354
apoba	ENSDARG00000042780	yes	yes	yes	566465
apobb.1	ENSDARG00000022767	yes	yes	yes	321166
apobb.2	ENSDARG00000075016	yes	yes	yes	100330435
apobec2a	ENSDARG00000018881	yes	yes	yes	503736
apobec2b	ENSDARG00000113992	yes	yes	no	567047
apoc1	ENSDARG00000092170	yes	yes	yes	570638
apoc2	ENSDARG00000092155	yes	yes	yes	568972
apoc4	ENSDARG00000075614	yes	yes	yes	570390
apoda.1	ENSDARG00000060345	yes	yes	yes	767642
apoda.2	ENSDARG00000060350	yes	yes	yes	100148022
apodb	ENSDARG00000057437	yes	yes	yes	567972
apoea	ENSDARG00000102004	yes	yes	yes	553587
apoeb	ENSDARG00000040295	yes	yes	yes	30314
apof	ENSDARG00000090980	yes	yes	yes	793418
apol1	ENSDARG00000007425	yes	yes	yes	560340
apom	ENSDARG00000076838	yes	yes	yes	569714
apooa	ENSDARG00000104696	yes	yes	yes	641319
apoob	ENSDARG00000026444	yes	yes	yes	449837
apool	ENSDARG00000039374	yes	yes	yes	541537
apopt1	ENSDARG00000092473	yes	yes	yes	798687
appa	ENSDARG00000104279	yes	yes	yes	58083
appb	ENSDARG00000055543	yes	yes	yes	170846
appbp2	ENSDARG00000007566	yes	yes	yes	322995
appl2	ENSDARG00000100151	yes	yes	yes	100329494
appl2	ENSDARG00000078139	yes	yes	yes	100000135
aprt	ENSDARG00000003519	yes	yes	yes	393641
aptx	ENSDARG00000027143	yes	yes	yes	405797
aqp10a	ENSDARG00000007086	yes	yes	yes	436621
aqp10b	ENSDARG00000058678	yes	yes	yes	100034395
aqp11	ENSDARG00000100555	yes	yes	yes	553476
aqp12	ENSDARG00000043279	yes	yes	yes	436844
aqp1a.1	ENSDARG00000023713	yes	yes	yes	335821
aqp1a.2	ENSDARG00000091027	yes	yes	yes	559284
aqp3a	ENSDARG00000003808	yes	yes	yes	406777
aqp3b	ENSDARG00000069518	yes	yes	no	568049
aqp4	ENSDARG00000010565	yes	yes	yes	445293
aqp7	ENSDARG00000026787	yes	yes	yes	334529
aqp8a.1	ENSDARG00000045141	yes	yes	yes	447923
aqp8a.2	ENSDARG00000071592	yes	yes	yes	563130
aqp8b	ENSDARG00000089749	yes	yes	yes	555598
aqp9b	ENSDARG00000053480	yes	yes	yes	570191
aqr	ENSDARG00000016775	yes	yes	no	393436
ar	ENSDARG00000067976	yes	yes	yes	100005148
araf	ENSDARG00000054533	yes	yes	yes	403063
arap1a	ENSDARG00000062221	yes	yes	yes	571767
arap3	ENSDARG00000076801	yes	yes	yes	558931
arcn1a	ENSDARG00000002792	yes	yes	yes	266982
arcn1b	ENSDARG00000031214	yes	yes	yes	399661
areg	ENSDARG00000076853	yes	yes	yes	101884611
AREL1	ENSDARG00000100359	yes	yes	yes	100332031
arf1	ENSDARG00000009484	yes	yes	yes	114428
arf2a	ENSDARG00000014763	yes	yes	yes	399477
arf2b	ENSDARG00000056582	yes	yes	yes	795766
arf2b	ENSDARG00000016393	yes	yes	yes	327026
arf3a	ENSDARG00000070539	yes	yes	yes	445047
arf3b	ENSDARG00000036998	yes	yes	yes	368822
arf4a	ENSDARG00000103858	yes	yes	yes
arf4a	ENSDARG00000045989	yes	yes	yes	445196
arf4b	ENSDARG00000100339	yes	yes	no	550402
ARF5	ENSDARG00000073876	yes	yes	yes	100333040
ARF5	ENSDARG00000074210	yes	yes	yes	550265
arf5	ENSDARG00000070472	yes	yes	yes	378724
arf6a	ENSDARG00000101626	yes	yes	yes	336063
arf6b	ENSDARG00000052928	yes	yes	yes	100003206
arfgap1	ENSDARG00000101616	yes	yes	no	100149572
arfgap2	ENSDARG00000067601	yes	yes	yes	641490
arfgap3	ENSDARG00000097583	yes	yes	yes	402889
arfgef1	ENSDARG00000063474	yes	yes	yes	100329953
arfgef2	ENSDARG00000074702	yes	yes	yes	100334572
arfgef3	ENSDARG00000077656	yes	yes	no	562652
arfip1	ENSDARG00000070055	yes	yes	yes	100003895
arfip2a	ENSDARG00000059244	yes	yes	yes	449664
arfip2b	ENSDARG00000056664	yes	yes	yes	550342
arfrp1	ENSDARG00000057857	yes	yes	yes	503602
arg1	ENSDARG00000057429	yes	yes	no	570368
arg2	ENSDARG00000039269	yes	yes	yes	322614
arglu1a	ENSDARG00000019223	yes	yes	yes	406834
arglu1b	ENSDARG00000018319	yes	yes	yes	393131
arhgap1	ENSDARG00000024324	yes	yes	yes	550478
arhgap10	ENSDARG00000078326	yes	yes	yes	692277
arhgap11a	ENSDARG00000100019	yes	yes	yes	406608
arhgap12a	ENSDARG00000008548	yes	yes	yes	563267
arhgap12b	ENSDARG00000026482	yes	yes	yes	393848
arhgap15	ENSDARG00000062349	yes	yes	yes	100003547
arhgap17a	ENSDARG00000020488	yes	yes	yes	550254
arhgap17b	ENSDARG00000062263	yes	yes	yes	100141341
arhgap18	ENSDARG00000074740	yes	yes	no	100004252
arhgap19	ENSDARG00000083189	yes	yes	yes	100537002
arhgap20	ENSDARG00000089326	yes	yes	yes	796434
arhgap20b	ENSDARG00000093708	yes	no	no
arhgap21a	ENSDARG00000104295	yes	yes	yes	101883923
arhgap21b	ENSDARG00000075673	yes	yes	yes	326745
ARHGAP22	ENSDARG00000076434	yes	yes	no	555573
arhgap22	ENSDARG00000021255	yes	yes	no	562503
arhgap23a	ENSDARG00000052950	yes	yes	yes	100006233
arhgap23b	ENSDARG00000026840	yes	yes	yes	562244
arhgap24	ENSDARG00000100973	yes	yes	yes	100005116
arhgap25	ENSDARG00000061784	yes	yes	no	562468
arhgap27	ENSDARG00000104255	yes	yes	yes	564211
arhgap27l	ENSDARG00000061798	yes	yes	yes	566523
arhgap28	ENSDARG00000101350	yes	yes	yes
arhgap29a	ENSDARG00000026329	yes	yes	yes	564805
arhgap29b	ENSDARG00000017748	yes	yes	yes	378998
arhgap31	ENSDARG00000059472	yes	yes	yes	101885883
arhgap32a	ENSDARG00000075334	yes	yes	yes	562449
arhgap32b	ENSDARG00000074184	yes	yes	no	569434
arhgap33	ENSDARG00000011333	yes	yes	yes	569720
arhgap35a	ENSDARG00000062577	yes	yes	yes	100004299
arhgap35b	ENSDARG00000060297	yes	yes	yes	564565
arhgap36	ENSDARG00000059672	yes	yes	yes	559813
arhgap39	ENSDARG00000100007	yes	yes	no	101884459
arhgap42a	ENSDARG00000056619	yes	yes	yes	566275
arhgap42b	ENSDARG00000010654	yes	yes	no	569534
arhgap44	ENSDARG00000104549	yes	yes	no	100333556
arhgap4a	ENSDARG00000039265	yes	yes	yes	393416
arhgap4b	ENSDARG00000015003	yes	yes	yes	561231
arhgap5	ENSDARG00000061294	yes	yes	yes	795752
ARHGAP6	ENSDARG00000111170	yes	yes	yes
arhgdia	ENSDARG00000043795	yes	yes	yes	406770
arhgdig	ENSDARG00000004034	yes	yes	yes	394132
arhgef10	ENSDARG00000077788	yes	yes	yes	334278
arhgef10la	ENSDARG00000088630	yes	yes	yes	799435
arhgef10lb	ENSDARG00000074244	yes	yes	no	567649
arhgef11	ENSDARG00000052482	yes	yes	yes
arhgef12a	ENSDARG00000030532	yes	yes	yes	562455
arhgef12b	ENSDARG00000100913	yes	yes	yes	571031
arhgef15	ENSDARG00000100293	yes	yes	yes	101882903
arhgef16	ENSDARG00000077114	yes	yes	yes	567180
ARHGEF17	ENSDARG00000101644	yes	yes	yes	100002227
arhgef18a	ENSDARG00000011157	yes	yes	yes	407987
arhgef18b	ENSDARG00000042308	yes	yes	yes	562264
arhgef19	ENSDARG00000078853	yes	yes	yes	569202
arhgef1a	ENSDARG00000040380	yes	yes	yes	368266
arhgef1b	ENSDARG00000055837	yes	yes	yes	557983
arhgef2	ENSDARG00000075819	yes	yes	yes	561276
arhgef25b	ENSDARG00000014465	yes	yes	yes	569561
arhgef28	ENSDARG00000060415	yes	yes	yes	559941
arhgef3	ENSDARG00000013834	yes	yes	yes	570228
arhgef33	ENSDARG00000097964	yes	yes	yes	559216
arhgef37	ENSDARG00000002463	yes	yes	yes	101883655
arhgef38	ENSDARG00000079377	yes	yes	yes	100317614
arhgef39	ENSDARG00000013476	yes	yes	yes	492469
arhgef3l	ENSDARG00000037554	yes	yes	yes	553761
arhgef4	ENSDARG00000012914	yes	yes	yes	559017
arhgef40	ENSDARG00000078979	yes	yes	yes	100151026
arhgef6	ENSDARG00000006683	yes	yes	yes	558288
arhgef7a	ENSDARG00000006299	yes	yes	yes	553493
arhgef7b	ENSDARG00000073848	yes	yes	yes	494081
arhgef9a	ENSDARG00000061746	yes	yes	yes	559868
arhgef9b	ENSDARG00000078624	yes	yes	yes	560923
arid1aa	ENSDARG00000101710	yes	yes	yes	100141358
arid1ab	ENSDARG00000101891	yes	yes	yes	568161
arid1b	ENSDARG00000092503	yes	yes	yes	569589
arid2	ENSDARG00000007413	yes	yes	yes	566352
arid3a	ENSDARG00000070843	yes	yes	no	562799
arid3b	ENSDARG00000104034	yes	yes	yes	571249
arid3c	ENSDARG00000067729	yes	yes	yes	569444
arid4a	ENSDARG00000043873	yes	yes	yes	327404
arid5a	ENSDARG00000077120	yes	yes	yes	100462698
arid5b	ENSDARG00000037196	yes	yes	yes	100536827
arid6	ENSDARG00000069988	yes	yes	yes	572528
arih1	ENSDARG00000003616	yes	yes	yes	327005
arih1l	ENSDARG00000036870	yes	yes	yes	405859
arih2	ENSDARG00000012848	yes	yes	yes	406417
arl1	ENSDARG00000101680	yes	yes	yes	436746
arl11	ENSDARG00000036637	yes	yes	yes	324689
arl13a	ENSDARG00000052575	yes	yes	yes	793658
arl13b	ENSDARG00000012763	yes	yes	yes	286784
arl14	ENSDARG00000063223	yes	yes	yes	556921
arl14ep	ENSDARG00000001210	yes	yes	yes	751672
arl15a	ENSDARG00000076040	yes	yes	yes	567657
arl15b	ENSDARG00000057995	yes	yes	no	560030
arl16	ENSDARG00000059498	yes	yes	yes	100037345
arl2	ENSDARG00000069496	yes	yes	yes	449774
arl2bp	ENSDARG00000025383	yes	yes	yes	393976
arl3	ENSDARG00000071409	yes	yes	yes	797451
arl3l1	ENSDARG00000111106	yes	yes	yes	393666
arl3l2	ENSDARG00000015404	yes	yes	yes	393692
arl4aa	ENSDARG00000099918	yes	yes	yes	393834
arl4ab	ENSDARG00000033182	yes	yes	yes	338267
arl4ca	ENSDARG00000057606	yes	yes	yes	550444
arl4cb	ENSDARG00000032708	yes	yes	yes	406531
arl4d	ENSDARG00000045074	yes	yes	yes	323573
arl5a	ENSDARG00000018627	yes	yes	yes	436611
arl5c	ENSDARG00000035719	yes	yes	yes	393819
arl6	ENSDARG00000032056	yes	yes	yes	494134
arl6ip1	ENSDARG00000054578	yes	yes	yes	394087
arl6ip4	ENSDARG00000105036	yes	yes	yes	553796
arl6ip5a	ENSDARG00000077044	yes	yes	yes	450076
arl6ip5b	ENSDARG00000016238	yes	yes	yes	436790
arl6ip6	ENSDARG00000071013	yes	yes	yes	100037347
arl8	ENSDARG00000094709	yes	yes	yes	327551
arl8a	ENSDARG00000078686	yes	yes	yes	567222
arl8ba	ENSDARG00000006915	yes	yes	yes	337424
arl8bb	ENSDARG00000070318	yes	yes	yes	562445
arl9	ENSDARG00000071881	yes	yes	yes	751670
armc1	ENSDARG00000013861	yes	yes	yes	494066
armc10	ENSDARG00000062960	yes	yes	yes	557740
armc1l	ENSDARG00000020887	yes	yes	yes	321240
armc2	ENSDARG00000022660	yes	yes	yes	555846
armc3	ENSDARG00000074708	yes	yes	yes	560136
armc4	ENSDARG00000055128	yes	yes	yes	799229
armc5	ENSDARG00000078083	yes	yes	yes	569910
ARMC6	ENSDARG00000103770	yes	yes	no	555425
armc7	ENSDARG00000061197	yes	yes	yes	767659
armc8	ENSDARG00000062258	yes	yes	yes	571528
armc9	ENSDARG00000087299	yes	yes	yes	100334308
armh1	ENSDARG00000029859	yes	yes	yes	100000984
armh3	ENSDARG00000104285	yes	yes	yes	393591
armt1	ENSDARG00000055676	yes	yes	yes	541518
arnt	ENSDARG00000021855	yes	yes	yes	493634
arnt2	ENSDARG00000103697	yes	yes	yes	64277
arntl1a	ENSDARG00000006791	yes	yes	yes	58098
arntl1b	ENSDARG00000035732	yes	yes	yes	352935
arntl2	ENSDARG00000041381	yes	yes	yes	58099
arpc1a	ENSDARG00000008383	yes	yes	yes	394243
arpc1b	ENSDARG00000027063	yes	yes	yes	335474
arpc2	ENSDARG00000075989	yes	yes	yes	327068
arpc3	ENSDARG00000057882	yes	yes	yes	415204
arpc4	ENSDARG00000054063	yes	yes	yes	114456
arpc4l	ENSDARG00000058225	yes	yes	yes	445305
arpc5a	ENSDARG00000039142	yes	yes	yes	336504
arpc5b	ENSDARG00000019062	yes	yes	yes	399482
arpc5la	ENSDARG00000041720	yes	yes	yes	393550
arpc5lb	ENSDARG00000035433	yes	yes	yes	556104
arpin	ENSDARG00000041085	yes	yes	yes	550477
arpp19a	ENSDARG00000032532	yes	yes	yes	393603
arpp19b	ENSDARG00000039880	yes	yes	yes	393947
arpp21	ENSDARG00000061081	yes	yes	yes	564134
arr3a	ENSDARG00000056511	yes	yes	yes	436678
arr3b	ENSDARG00000098475	yes	yes	yes	796867
arrb1	ENSDARG00000043241	yes	yes	no	553266
arrb2a	ENSDARG00000039215	yes	yes	yes	321378
arrb2b	ENSDARG00000011545	yes	yes	yes	394099
arrdc1a	ENSDARG00000068148	yes	yes	yes	100006005
arrdc1b	ENSDARG00000079839	yes	yes	no	570029
arrdc2	ENSDARG00000020761	yes	yes	yes	335206
arrdc3a	ENSDARG00000052690	yes	yes	yes	566685
arrdc3b	ENSDARG00000036028	yes	yes	yes	447866
arsa	ENSDARG00000042270	yes	yes	yes	541416
ARSB	ENSDARG00000108788	yes	yes	no	100538007
arsg	ENSDARG00000101715	yes	yes	yes	564790
arsh	ENSDARG00000002299	yes	yes	no	100332997
arsia	ENSDARG00000077606	yes	yes	yes	100329483
arsib	ENSDARG00000117075	yes	yes	no	563783
arsj	ENSDARG00000077590	yes	yes	yes	559800
arsk	ENSDARG00000059714	yes	yes	yes	562412
art4	ENSDARG00000078178	yes	yes	yes	555597
artna	ENSDARG00000096252	yes	yes	no
artnb	ENSDARG00000093714	yes	no	no	101883396
arv1	ENSDARG00000074757	yes	yes	yes	568203
arvcfa	ENSDARG00000074329	yes	yes	yes	572216
arvcfb	ENSDARG00000061688	yes	yes	yes	564669
arxa	ENSDARG00000058011	yes	yes	yes	30657
arxb	ENSDARG00000101523	yes	yes	yes	100329907
as3mt	ENSDARG00000027572	yes	yes	yes	664699
asah1a	ENSDARG00000037091	yes	yes	yes	450068
asah1b	ENSDARG00000034817	yes	yes	yes	393549
asah2	ENSDARG00000012829	yes	yes	yes	493602
asap1a	ENSDARG00000029463	yes	yes	yes	100170829
asap1b	ENSDARG00000039729	yes	yes	yes	565859
asap2a	ENSDARG00000010181	yes	yes	yes	570669
asap2b	ENSDARG00000019564	yes	yes	yes	560581
asap3	ENSDARG00000021896	yes	yes	yes	664764
asb1	ENSDARG00000026635	yes	yes	yes	554673
asb10	ENSDARG00000099461	yes	yes	yes	559467
asb11	ENSDARG00000056561	yes	yes	yes	791758
asb12a	ENSDARG00000017086	yes	yes	yes	322927
asb12b	ENSDARG00000037558	yes	yes	yes	445507
asb13a.1	ENSDARG00000079698	yes	yes	yes	436801
asb13a.2	ENSDARG00000045765	yes	yes	yes	563551
asb13b	ENSDARG00000089833	yes	yes	yes	556808
asb14a	ENSDARG00000008473	yes	yes	yes	568371
asb14b	ENSDARG00000087741	yes	yes	yes	100535284
asb15a	ENSDARG00000045633	yes	yes	yes	100151067
asb15b	ENSDARG00000045863	yes	yes	no	568579
asb16	ENSDARG00000056468	yes	yes	yes	678621
asb18	ENSDARG00000114572	yes	yes	yes	792746
asb2a.1	ENSDARG00000003797	yes	yes	yes	567986
asb2a.1	ENSDARG00000096748	yes	yes	yes	100536271
asb2b	ENSDARG00000102490	yes	yes	yes	402848
asb3	ENSDARG00000005246	yes	yes	yes	334210
asb4	ENSDARG00000034988	yes	yes	yes	550321
asb5a	ENSDARG00000097938	yes	yes	yes	550441
asb5b	ENSDARG00000053222	yes	yes	yes	550449
asb6	ENSDARG00000007125	yes	yes	yes	553600
asb7	ENSDARG00000006494	yes	yes	yes	405798
asb8	ENSDARG00000003383	yes	yes	yes	327200
ascc1	ENSDARG00000077760	yes	yes	yes	550273
ascc2	ENSDARG00000013058	yes	yes	yes	393414
ascc3	ENSDARG00000086678	yes	yes	no	100332599
ascl1a	ENSDARG00000038386	yes	yes	yes	30466
ascl1b	ENSDARG00000009702	yes	yes	yes	560440
ascl1b	ENSDARG00000101628	yes	yes	yes	30478
asf1ba	ENSDARG00000101037	yes	yes	yes	386897
asf1bb	ENSDARG00000043713	yes	yes	yes	792029
ash1l	ENSDARG00000070981	yes	yes	yes	563799
ash2l	ENSDARG00000060392	yes	yes	yes	558193
asic1a	ENSDARG00000008329	yes	yes	yes	791696
asic1b	ENSDARG00000101866	yes	yes	yes	407672
asic1c	ENSDARG00000098428	yes	yes	no	407670
asic2	ENSDARG00000006849	yes	yes	yes	407669
asic4a	ENSDARG00000025162	yes	yes	yes	407668
asic4b	ENSDARG00000004243	yes	yes	yes	407667
asip1	ENSDARG00000077858	yes	yes	yes	798574
asip2b	ENSDARG00000114760	yes	yes	yes	796595
asl	ENSDARG00000033361	yes	yes	yes	393423
asmt	ENSDARG00000098249	yes	yes	yes	100141344
asmt2	ENSDARG00000070874	yes	yes	yes	568256
asmtl	ENSDARG00000021433	yes	yes	yes	324134
asna1	ENSDARG00000018190	yes	yes	yes	325704
asns	ENSDARG00000016375	yes	yes	yes	394138
asnsd1	ENSDARG00000000540	yes	yes	yes	110631416
aspa	ENSDARG00000005154	yes	yes	yes	557232
aspdh	ENSDARG00000038297	yes	yes	yes	447919
aspg	ENSDARG00000052942	yes	yes	yes	100124594
asph	ENSDARG00000055945	yes	yes	yes	323659
asphd1	ENSDARG00000075813	yes	yes	yes	557921
asphd2	ENSDARG00000059629	yes	yes	yes	569819
aspm	ENSDARG00000103754	yes	yes	yes	554173
aspn	ENSDARG00000002192	yes	yes	yes	65228
aspscr1	ENSDARG00000105321	yes	yes	no	550237
asrgl1	ENSDARG00000021681	yes	yes	yes	541402
ASS1	ENSDARG00000103044	yes	yes	no
ASTE1	ENSDARG00000062530	yes	yes	yes	100003699
aste1a	ENSDARG00000070132	yes	yes	yes	100006826
astn1	ENSDARG00000068323	yes	yes	yes	791157
asxl1	ENSDARG00000036956	yes	yes	yes	403066
asxl2	ENSDARG00000076501	yes	yes	yes	100150267
asz1	ENSDARG00000004823	yes	yes	yes	572911
atad1a	ENSDARG00000023267	yes	yes	yes	368672
atad1b	ENSDARG00000056609	yes	yes	yes	368412
atad2	ENSDARG00000076590	yes	yes	no
atad2b	ENSDARG00000060537	yes	yes	no	100331225
atad3	ENSDARG00000086848	yes	no	no	403004
atad5a	ENSDARG00000070568	yes	yes	yes	560591
atad5b	ENSDARG00000101126	yes	yes	yes	321619
atat1	ENSDARG00000004472	yes	yes	yes	406389
atcaya	ENSDARG00000071678	yes	yes	yes	565827
atcayb	ENSDARG00000059781	yes	yes	yes	100329872
ATE1	ENSDARG00000103813	yes	yes	yes	101886126
atf1	ENSDARG00000044301	yes	yes	yes	325609
atf2	ENSDARG00000023903	yes	yes	no	100006516
atf3	ENSDARG00000007823	yes	yes	yes	393939
atf4a	ENSDARG00000111939	yes	yes	yes	406514
atf4b	ENSDARG00000038141	yes	yes	yes	556410
atf5a	ENSDARG00000068096	yes	yes	yes	566223
atf5b	ENSDARG00000077785	yes	yes	yes	567253
atf6	ENSDARG00000012656	yes	yes	yes	558071
atf7a	ENSDARG00000011298	yes	yes	yes	566279
atf7b	ENSDARG00000055481	yes	yes	yes	567018
atf7ip	ENSDARG00000069619	yes	yes	yes	558977
atf7ip2	ENSDARG00000089698	yes	yes	yes	100005485
atg10	ENSDARG00000104846	yes	yes	yes	641330
atg101	ENSDARG00000043287	yes	yes	yes	567680
atg12	ENSDARG00000069545	yes	yes	yes	570965
atg13	ENSDARG00000036040	yes	yes	yes	393405
ATG14	ENSDARG00000002670	yes	yes	yes	407686
atg16l1	ENSDARG00000099430	yes	yes	yes	550552
atg16l2	ENSDARG00000109384	yes	yes	yes
atg16l2	ENSDARG00000043238	yes	no	no	100034627
ATG2A	ENSDARG00000101507	yes	yes	no	101883461
atg2b	ENSDARG00000097650	yes	yes	yes	100000277
atg3	ENSDARG00000009350	yes	yes	yes	336632
atg4a	ENSDARG00000014531	yes	yes	yes	554140
atg4b	ENSDARG00000052104	yes	yes	yes	448859
atg4c	ENSDARG00000044373	yes	yes	yes	415193
atg4da	ENSDARG00000043548	yes	yes	yes	795933
atg4db	ENSDARG00000088145	yes	yes	no	100329304
atg5	ENSDARG00000023396	yes	yes	yes	494180
atg7	ENSDARG00000102893	yes	yes	yes	100333016
atg9a	ENSDARG00000044551	yes	yes	yes	100009663
atg9b	ENSDARG00000055292	yes	yes	yes	791223
atic	ENSDARG00000016706	yes	yes	yes	140622
atl1	ENSDARG00000060481	yes	yes	yes	571909
atl2	ENSDARG00000057719	yes	yes	yes	323665
atl3	ENSDARG00000004270	yes	yes	yes	449995
atm	ENSDARG00000002385	yes	yes	yes	403064
atmin	ENSDARG00000068601	yes	yes	no	571606
atn1	ENSDARG00000092067	yes	yes	yes	321707
atoh1a	ENSDARG00000055294	yes	yes	yes	30303
atoh1b	ENSDARG00000099564	yes	yes	yes	493915
atoh1c	ENSDARG00000039602	yes	yes	yes	100498672
atoh7	ENSDARG00000069552	yes	yes	yes	58216
atoh8	ENSDARG00000037555	yes	yes	yes	561606
atox1	ENSDARG00000087693	yes	yes	yes	558347
atp10a	ENSDARG00000061039	yes	yes	yes	567172
atp10b	ENSDARG00000076230	yes	yes	yes	563932
atp10d	ENSDARG00000078887	yes	yes	yes	571658
atp11a	ENSDARG00000008413	yes	yes	yes	562925
ATP11B	ENSDARG00000101094	yes	yes	yes	100329583
atp11c	ENSDARG00000036442	yes	yes	yes	368385
atp13a1	ENSDARG00000029931	yes	yes	yes	334466
atp13a2	ENSDARG00000061890	yes	yes	yes	568666
atp13a3	ENSDARG00000076622	yes	yes	yes	572029
atp1a1a.1	ENSDARG00000002791	yes	yes	yes	64612
atp1a1a.2	ENSDARG00000007739	yes	yes	yes	64613
atp1a1a.3	ENSDARG00000039131	yes	yes	yes	64614
atp1a1a.4	ENSDARG00000001870	yes	yes	yes	64615
atp1a1a.5	ENSDARG00000040252	yes	yes	yes	245703
atp1a1b	ENSDARG00000019856	yes	yes	yes	64616
atp1a2a	ENSDARG00000010472	yes	yes	yes	64609
atp1a3a	ENSDARG00000018259	yes	yes	yes	64610
atp1a3b	ENSDARG00000104139	yes	yes	yes	64611
atp1b1a	ENSDARG00000013144	yes	yes	yes	64267
atp1b1b	ENSDARG00000076833	yes	yes	yes	64273
atp1b2a	ENSDARG00000099203	yes	yes	yes	64269
atp1b2b	ENSDARG00000034424	yes	yes	yes	114457
atp1b3a	ENSDARG00000015790	yes	yes	yes	30468
atp1b3b	ENSDARG00000042837	yes	yes	yes	64272
atp1b4	ENSDARG00000053262	yes	yes	yes	100037383
atp23	ENSDARG00000063686	yes	yes	yes	100004177
atp2a1	ENSDARG00000020574	yes	yes	yes	260440
atp2a1l	ENSDARG00000035458	yes	yes	yes	494489
atp2a2a	ENSDARG00000029439	yes	yes	yes	393940
atp2a2b	ENSDARG00000005122	yes	yes	yes	568265
atp2a3	ENSDARG00000060978	yes	yes	yes	568671
atp2b1a	ENSDARG00000012684	yes	yes	yes	378746
atp2b1b	ENSDARG00000007788	yes	yes	yes	561190
atp2b2	ENSDARG00000063433	yes	yes	yes	557430
atp2b2	ENSDARG00000044902	yes	yes	yes	768304
atp2b3a	ENSDARG00000043474	yes	yes	yes	436745
atp2b3b	ENSDARG00000023445	yes	yes	yes	558525
atp2c1	ENSDARG00000060197	yes	yes	yes	559574
atp5f1b	ENSDARG00000070083	yes	yes	yes	554135
atp5f1c	ENSDARG00000045514	yes	yes	yes	336957
atp5f1d	ENSDARG00000019404	yes	yes	yes	335709
atp5f1e	ENSDARG00000095897	yes	yes	yes	798291
atp5fa1	ENSDARG00000010149	yes	yes	yes	553755
atp5if1a	ENSDARG00000067975	yes	yes	yes	100037369
atp5if1b	ENSDARG00000044092	yes	yes	yes	558368
atp5l	ENSDARG00000011841	yes	yes	yes	326977
atp5mc1	ENSDARG00000056008	yes	yes	yes	406301
atp5mc3a	ENSDARG00000017775	yes	yes	yes	394151
atp5mc3b	ENSDARG00000009447	yes	yes	yes	81541
atp5md	ENSDARG00000096003	yes	yes	yes	794625
atp5mea	ENSDARG00000078113	yes	yes	yes	559659
atp5meb	ENSDARG00000068940	yes	yes	yes	767750
atp5mf	ENSDARG00000037867	yes	yes	yes	402883
atp5pb	ENSDARG00000011553	yes	yes	yes	449787
atp5pd	ENSDARG00000098355	yes	yes	yes	393675
atp5pf	ENSDARG00000014313	yes	yes	yes	406599
atp5po	ENSDARG00000001788	yes	yes	yes	335191
atp6ap1a	ENSDARG00000041417	yes	yes	yes	100004566
atp6ap1b	ENSDARG00000037153	yes	yes	yes	195824
atp6ap1la	ENSDARG00000091509	yes	yes	yes	100000415
atp6ap1lb	ENSDARG00000090963	yes	yes	yes	561786
atp6ap2	ENSDARG00000008735	yes	yes	yes	406296
atp6v0a1a	ENSDARG00000020847	yes	yes	yes	324307
atp6v0a1b	ENSDARG00000015174	yes	yes	yes	553691
atp6v0a2a	ENSDARG00000035538	yes	yes	yes	561469
atp6v0a2b	ENSDARG00000035565	yes	yes	yes	561117
atp6v0b	ENSDARG00000031681	yes	yes	yes	321724
atp6v0ca	ENSDARG00000057853	yes	yes	yes	192336
atp6v0cb	ENSDARG00000036577	yes	yes	yes	325402
atp6v0d1	ENSDARG00000069090	yes	yes	yes	322811
atp6v1aa	ENSDARG00000034534	yes	yes	yes	394110
atp6v1ab	ENSDARG00000076318	yes	yes	yes	337583
atp6v1b2	ENSDARG00000043465	yes	yes	yes	359840
atp6v1ba	ENSDARG00000013443	yes	yes	yes	359839
atp6v1c1a	ENSDARG00000023967	yes	yes	yes	368907
atp6v1c1b	ENSDARG00000035880	yes	yes	yes	449655
atp6v1c2	ENSDARG00000070440	yes	yes	yes	100538220
atp6v1d	ENSDARG00000011175	yes	yes	yes	393935
atp6v1e1a	ENSDARG00000014085	yes	yes	yes	108179059
atp6v1e1b	ENSDARG00000030694	yes	yes	yes	192335
atp6v1f	ENSDARG00000045543	yes	yes	yes	436799
atp6v1g1	ENSDARG00000022315	yes	yes	yes	335025
atp6v1h	ENSDARG00000006370	yes	yes	yes	286779
atp7a	ENSDARG00000003699	yes	yes	yes	564924
atp7b	ENSDARG00000058145	yes	yes	no	556499
atp8a1	ENSDARG00000063001	yes	yes	yes	767630
ATP8A1	ENSDARG00000114495	yes	yes	yes
atp8a2	ENSDARG00000077492	yes	yes	yes	100330943
atp8b1	ENSDARG00000060980	yes	yes	yes	100148342
atp8b2	ENSDARG00000099216	yes	yes	no
atp8b3	ENSDARG00000042285	yes	yes	yes	566530
atp8b4	ENSDARG00000079453	yes	yes	yes	559291
atp8b5a	ENSDARG00000062040	yes	yes	no	100330945
ATP9A	ENSDARG00000115869	yes	yes	yes	101886226
atp9b	ENSDARG00000062521	yes	yes	yes	568160
atpaf1	ENSDARG00000042799	yes	yes	yes	550606
atpaf2	ENSDARG00000056270	yes	yes	yes	560253
atpv0e2	ENSDARG00000059057	yes	yes	yes	553767
atr	ENSDARG00000079625	yes	yes	yes	567770
atraid	ENSDARG00000043388	yes	yes	yes	553468
atrip	ENSDARG00000063076	yes	yes	yes	558534
atrn	ENSDARG00000062164	yes	yes	yes	794975
atrnl1a	ENSDARG00000077188	yes	yes	no	792417
atrnl1b	ENSDARG00000006420	yes	yes	yes	569196
atrx	ENSDARG00000042236	yes	yes	yes	323299
atrxl	ENSDARG00000099449	yes	yes	no
atxn10	ENSDARG00000008439	yes	yes	yes	100034473
atxn1a	ENSDARG00000061687	yes	yes	no	557340
atxn1b	ENSDARG00000060862	yes	yes	yes	565841
atxn1l	ENSDARG00000086977	yes	yes	no	793927
atxn2	ENSDARG00000052897	yes	yes	yes	569210
atxn2l	ENSDARG00000011597	yes	yes	yes	324525
atxn3	ENSDARG00000099274	yes	yes	no	394079
atxn7	ENSDARG00000074804	yes	yes	yes	100001490
atxn7l1	ENSDARG00000089860	yes	yes	yes	100536590
atxn7l2a	ENSDARG00000055300	yes	yes	yes	692316
atxn7l2b	ENSDARG00000056268	yes	yes	yes	436928
atxn7l3	ENSDARG00000029331	yes	yes	yes	368510
auh	ENSDARG00000042975	yes	yes	yes	445182
aup1	ENSDARG00000092609	yes	yes	yes	324654
aurka	ENSDARG00000012485	yes	yes	yes	445246
aurkaip1	ENSDARG00000074985	yes	yes	yes	100126015
aurkb	ENSDARG00000037640	yes	yes	yes	791894
auts2a	ENSDARG00000056427	yes	yes	yes	368890
auts2b	ENSDARG00000020946	yes	yes	yes	100150849
avd	ENSDARG00000087961	yes	yes	yes	567678
aven	ENSDARG00000002894	yes	yes	yes	692323
avil	ENSDARG00000059342	yes	yes	yes	678618
avl9	ENSDARG00000055538	yes	yes	yes	751682
avp	ENSDARG00000058567	yes	yes	yes	352922
avpr1aa	ENSDARG00000077083	yes	yes	yes	571591
avpr1ab	ENSDARG00000045788	yes	yes	yes	555939
avpr2aa	ENSDARG00000007436	yes	yes	no	100007585
avpr2ab	ENSDARG00000029219	yes	yes	yes	100151502
avpr2l	ENSDARG00000076690	yes	no	no	100004053
axdnd1	ENSDARG00000062355	yes	yes	yes	557839
axin1	ENSDARG00000102964	yes	yes	yes	57931
axin2	ENSDARG00000100149	yes	yes	yes	58080
AXL	ENSDARG00000112045	yes	yes	no	100330721
azi2	ENSDARG00000102419	yes	yes	yes	406377
azin1a	ENSDARG00000052789	yes	yes	yes	550230
azin1b	ENSDARG00000035869	yes	yes	yes	317764
b2m	ENSDARG00000053136	yes	yes	yes	30400
b2ml	ENSDARG00000015887	yes	yes	yes	791742
b3galnt2	ENSDARG00000046133	yes	yes	yes	553716
b3galt1a	ENSDARG00000079700	yes	yes	no	559521
b3galt2	ENSDARG00000102061	yes	yes	yes	404633
b3galt4	ENSDARG00000076218	yes	yes	no	101886595
b3galt6	ENSDARG00000038414	yes	yes	yes	572324
B3GAT1	ENSDARG00000113928	yes	yes	no	100332644
b3gat1a	ENSDARG00000040547	yes	yes	yes	548607
b3gat1b	ENSDARG00000055279	yes	yes	yes	100332851
b3gat2	ENSDARG00000030733	yes	yes	yes	445060
b3gat3	ENSDARG00000001939	yes	yes	yes	192334
b3glcta	ENSDARG00000073917	yes	yes	yes	799443
b3glctb	ENSDARG00000077740	yes	yes	yes	564156
B3GNT10	ENSDARG00000094253	yes	no	no	101883349
b3gnt2a	ENSDARG00000052376	yes	yes	yes	405766
b3gnt2b	ENSDARG00000091902	yes	yes	yes	793362
b3gnt2l	ENSDARG00000068219	yes	yes	no	797513
b3gnt3.1	ENSDARG00000043482	yes	yes	yes	494166
b3gnt3.2	ENSDARG00000054373	yes	yes	no	100002020
b3gnt3.3	ENSDARG00000093521	yes	yes	no	561028
b3gnt3.4	ENSDARG00000058100	yes	yes	no	561172
b3gnt5a	ENSDARG00000018971	yes	yes	yes	336526
b3gnt5b	ENSDARG00000004396	yes	yes	yes	791470
b3gnt7	ENSDARG00000038489	yes	yes	yes	286748
b3gnt7l	ENSDARG00000053133	yes	yes	yes	407623
b3gnt9	ENSDARG00000041616	yes	yes	yes	100034499
b3gntl1	ENSDARG00000043431	yes	yes	yes	619261
b4galnt1a	ENSDARG00000061520	yes	yes	yes	558684
b4galnt1b	ENSDARG00000077352	yes	yes	yes	793635
b4galnt2.1	ENSDARG00000094579	yes	yes	no	558078
b4galnt2.2	ENSDARG00000070605	yes	yes	yes	557782
b4galnt3a	ENSDARG00000078749	yes	yes	yes	561505
b4galnt3b	ENSDARG00000058939	yes	yes	yes	553524
b4galnt4a	ENSDARG00000046150	yes	yes	yes	565184
b4galnt4b	ENSDARG00000076701	yes	yes	yes	559305
b4galt1	ENSDARG00000002634	yes	yes	no
b4galt1l	ENSDARG00000104404	yes	yes	yes	768123
b4galt2	ENSDARG00000077994	yes	yes	yes	100148828
b4galt3	ENSDARG00000062329	yes	yes	yes	561756
b4galt4	ENSDARG00000104042	yes	yes	yes	492760
b4galt5	ENSDARG00000037815	yes	yes	yes	724080
b4galt6	ENSDARG00000010301	yes	yes	yes	393912
b4galt7	ENSDARG00000021899	yes	yes	yes	445022
b4gat1	ENSDARG00000077583	yes	yes	yes	101669768
b9d1	ENSDARG00000011727	yes	yes	yes	554150
b9d2	ENSDARG00000017385	yes	yes	yes	436667
baalca	ENSDARG00000077775	yes	yes	yes	572429
baalcb	ENSDARG00000089549	yes	yes	yes	100536942
babam1	ENSDARG00000077526	yes	yes	yes	445296
babam2	ENSDARG00000038863	yes	yes	yes	550474
bace1	ENSDARG00000101716	yes	no	no	403005
bace2	ENSDARG00000044781	yes	yes	yes	449818
bach1a	ENSDARG00000062553	yes	yes	yes	678555
bach1b	ENSDARG00000002196	yes	yes	yes	553688
bach2a	ENSDARG00000036569	yes	yes	yes	557210
bach2b	ENSDARG00000004074	yes	yes	yes	555350
bada	ENSDARG00000087993	yes	yes	no	564921
badb	ENSDARG00000054937	yes	yes	yes	58100
bag1	ENSDARG00000020895	yes	yes	yes	558108
bag2	ENSDARG00000035005	yes	yes	yes	393975
bag3	ENSDARG00000039486	yes	yes	yes	445139
bag4	ENSDARG00000043179	yes	yes	yes	100001980
bag5	ENSDARG00000017316	yes	yes	yes	569580
bag6	ENSDARG00000075892	yes	yes	yes	83910
bag6l	ENSDARG00000077531	yes	yes	yes	751663
bahcc1a	ENSDARG00000103739	yes	yes	yes	797750
bahcc1b	ENSDARG00000080009	yes	yes	yes	794333
bahd1	ENSDARG00000086789	yes	yes	yes	564712
baiap2a	ENSDARG00000062799	yes	yes	yes	678518
baiap2b	ENSDARG00000113723	yes	yes	no
baiap2b	ENSDARG00000103333	yes	yes	no
baiap2l1a	ENSDARG00000029305	yes	yes	yes	387261
baiap2l1b	ENSDARG00000031119	yes	yes	yes	550528
baiap2l2a	ENSDARG00000016483	yes	yes	yes	394210
baiap2l2b	ENSDARG00000060933	yes	yes	no	564798
baiap3	ENSDARG00000079264	yes	yes	yes	564728
bambia	ENSDARG00000055381	yes	yes	yes	83496
bambib	ENSDARG00000099677	yes	yes	yes	431736
banf1	ENSDARG00000037009	yes	yes	yes	334717
banp	ENSDARG00000017562	yes	yes	yes	553659
bap1	ENSDARG00000063051	yes	yes	yes	558885
bard1	ENSDARG00000076733	yes	yes	no	100147913
barhl1a	ENSDARG00000035508	yes	yes	yes	550407
barhl1b	ENSDARG00000019013	yes	yes	yes	553186
barhl2	ENSDARG00000104361	yes	yes	yes	100001699
barx1	ENSDARG00000007407	yes	yes	yes	553644
barx2	ENSDARG00000041098	yes	yes	no	100002200
basp1	ENSDARG00000053358	yes	yes	yes	569631
batf	ENSDARG00000011818	yes	yes	yes	564589
batf3	ENSDARG00000042577	yes	yes	yes	751677
baxa	ENSDARG00000089129	yes	yes	yes	100004321
baxa	ENSDARG00000020623	yes	yes	yes	58081
baxb	ENSDARG00000030881	yes	yes	yes	503609
baz1a	ENSDARG00000063233	yes	yes	yes
baz1a	ENSDARG00000099745	yes	yes	no	334173
baz1b	ENSDARG00000102832	yes	yes	no	571727
baz2a	ENSDARG00000102974	yes	yes	yes	450079
baz2ba	ENSDARG00000057782	yes	yes	yes	561095
bbc3	ENSDARG00000069282	yes	yes	yes	751763
bbip1	ENSDARG00000071046	yes	yes	yes	795943
bbox1	ENSDARG00000036135	yes	yes	yes	572649
bbs1	ENSDARG00000075169	yes	yes	yes	568986
bbs10	ENSDARG00000069515	yes	yes	yes	100034535
bbs12	ENSDARG00000016112	yes	yes	yes	570583
bbs2	ENSDARG00000041621	yes	yes	yes	259187
bbs4	ENSDARG00000063522	yes	yes	yes	768303
bbs5	ENSDARG00000039827	yes	yes	yes	393269
bbs7	ENSDARG00000059911	yes	yes	yes	557491
bbs9	ENSDARG00000079217	yes	yes	yes	100333716
bbx	ENSDARG00000012699	yes	yes	no	100005540
bcam	ENSDARG00000090190	yes	yes	yes	767689
bcan	ENSDARG00000099412	yes	yes	yes	334113
bcap29	ENSDARG00000016231	yes	yes	yes	554151
bcap31	ENSDARG00000044972	yes	yes	yes	368488
bcar1	ENSDARG00000056525	yes	yes	yes	568309
bcar3	ENSDARG00000016981	yes	yes	no	570610
bcas2	ENSDARG00000043631	yes	yes	yes	493614
bcas3	ENSDARG00000090764	yes	yes	yes	393594
bcat1	ENSDARG00000045568	yes	yes	yes	337412
bcat2	ENSDARG00000054849	yes	yes	yes	436949
bccip	ENSDARG00000004948	yes	yes	yes	541348
bcdin3d	ENSDARG00000074111	yes	yes	yes	568375
bckdha	ENSDARG00000040555	yes	yes	yes	554124
bckdhb	ENSDARG00000014676	yes	yes	yes	569980
bckdhbl	ENSDARG00000093569	yes	yes	yes	555648
bckdk	ENSDARG00000016904	yes	yes	yes	282677
bcl10	ENSDARG00000077130	yes	yes	yes	100334750
bcl11aa	ENSDARG00000061352	yes	yes	yes	678650
bcl11ab	ENSDARG00000063153	yes	yes	no	566491
bcl11ba	ENSDARG00000062510	yes	yes	yes	100093707
bcl2a	ENSDARG00000094704	yes	yes	yes	570772
bcl2b	ENSDARG00000089109	yes	yes	yes	100007048
bcl2l1	ENSDARG00000008434	yes	yes	yes	114401
bcl2l10	ENSDARG00000026766	yes	yes	yes	373113
bcl2l11	ENSDARG00000079144	yes	yes	no	100190951
bcl2l13	ENSDARG00000062370	yes	yes	yes	559355
bcl2l16	ENSDARG00000114237	yes	yes	yes	100359374
bcl3	ENSDARG00000087832	yes	yes	yes	565656
bcl6aa	ENSDARG00000070864	yes	yes	yes	393707
bcl6ab	ENSDARG00000069295	yes	yes	yes	100001936
bcl6b	ENSDARG00000069335	yes	yes	yes	793278
bcl7a	ENSDARG00000052907	yes	yes	yes	57952
bcl7ba	ENSDARG00000111877	yes	yes	yes	406444
bcl7bb	ENSDARG00000040396	yes	yes	yes	81595
bcl9	ENSDARG00000036687	yes	yes	yes	449616
bcl9l	ENSDARG00000055054	yes	yes	yes	449532
bco1	ENSDARG00000104256	yes	yes	yes	84039
bco1l	ENSDARG00000103659	yes	yes	yes	393580
bco2a	ENSDARG00000055722	yes	yes	yes	793849
bco2b	ENSDARG00000041715	yes	yes	yes	678554
bco2l	ENSDARG00000027620	yes	yes	yes	84041
bcor	ENSDARG00000017798	yes	yes	yes	402921
bcorl1	ENSDARG00000077912	yes	yes	yes	792710
bcr	ENSDARG00000079286	yes	yes	yes	568320
bcs1l	ENSDARG00000012295	yes	yes	yes	394157
bdh1	ENSDARG00000059388	yes	yes	yes	100037356
bdh2	ENSDARG00000052696	yes	yes	yes	550507
bdkrb1	ENSDARG00000020744	yes	yes	no	368199
bdnf	ENSDARG00000018817	yes	yes	yes	58118
bean1	ENSDARG00000087413	yes	yes	yes	101885923
becn1	ENSDARG00000079128	yes	yes	yes	393846
bend3	ENSDARG00000076903	yes	yes	yes	565716
BEND4	ENSDARG00000113607	yes	yes	yes	566937
bend5	ENSDARG00000075624	yes	yes	yes	566161
best1	ENSDARG00000078331	yes	yes	no	560608
best2	ENSDARG00000079163	yes	yes	no	567214
best4	ENSDARG00000078455	yes	yes	no	563711
bet1	ENSDARG00000034885	yes	yes	yes	415135
bet1l	ENSDARG00000032037	yes	yes	yes	445493
bfb	ENSDARG00000005616	yes	yes	yes	30489
BFSP1	ENSDARG00000074919	yes	yes	no
bfsp2	ENSDARG00000011998	yes	yes	yes	494090
bglap	ENSDARG00000058414	yes	yes	yes	792433
bglapl	ENSDARG00000104467	yes	yes	yes	337724
bgna	ENSDARG00000017884	yes	yes	yes	431774
bgnb	ENSDARG00000002945	yes	yes	yes	792197
bhlha15	ENSDARG00000045166	yes	yes	yes	777671
bhlha9	ENSDARG00000103981	yes	yes	yes	323481
bhlhe22	ENSDARG00000058039	yes	yes	yes	393930
bhlhe23	ENSDARG00000037588	yes	yes	yes	559796
bhlhe40	ENSDARG00000004060	yes	yes	yes	324413
bhlhe41	ENSDARG00000041691	yes	yes	yes	563771
bhmt	ENSDARG00000013430	yes	yes	yes	322228
bicc1a	ENSDARG00000061682	yes	yes	yes	568201
bicc1b	ENSDARG00000070497	yes	yes	no	571411
bicc2	ENSDARG00000076557	yes	yes	yes	402785
bicd1a	ENSDARG00000079496	yes	yes	no	556758
bicd2	ENSDARG00000075571	yes	yes	yes	557383
BICD2	ENSDARG00000098215	yes	yes	no	100330881
bicdl1	ENSDARG00000074761	yes	yes	yes	100537719
bicdl2	ENSDARG00000052427	yes	yes	yes	777640
bicdl2l	ENSDARG00000091669	yes	yes	yes	100334848
bicra	ENSDARG00000061159	yes	yes	yes	386775
bicral	ENSDARG00000016089	yes	yes	yes	559084
bida	ENSDARG00000069290	yes	yes	yes	559425
bik	ENSDARG00000045549	yes	yes	yes	564030
bin1a	ENSDARG00000042114	yes	yes	no	563561
bin1b	ENSDARG00000058820	yes	yes	yes	447863
bin2a	ENSDARG00000003219	yes	yes	yes	492780
bin2b	ENSDARG00000010255	yes	yes	yes	327387
bin3	ENSDARG00000099651	yes	yes	yes	323976
birc2	ENSDARG00000044619	yes	yes	yes	373107
birc5a	ENSDARG00000075621	yes	yes	yes	373110
birc5b	ENSDARG00000055655	yes	yes	yes	246726
birc6	ENSDARG00000074166	yes	yes	yes	796547
birc6-as2	ENSDARG00000097706	no	no	no	101885944
birc7	ENSDARG00000058082	yes	yes	yes	100073331
bivm	ENSDARG00000061409	yes	yes	yes
blcap	ENSDARG00000052073	yes	yes	yes	57918
blf	ENSDARG00000043126	yes	yes	yes	503516
blk	ENSDARG00000007783	yes	yes	yes	567764
blm	ENSDARG00000077089	yes	yes	yes	572540
blmh	ENSDARG00000025977	yes	yes	yes	336541
blnk	ENSDARG00000042722	yes	yes	yes	405764
bloc1s1	ENSDARG00000014171	yes	yes	yes	556597
bloc1s2	ENSDARG00000046081	yes	yes	yes	606665
bloc1s3	ENSDARG00000068828	yes	yes	yes	553529
bloc1s4	ENSDARG00000007597	yes	yes	yes	445081
bloc1s5	ENSDARG00000111747	yes	yes	yes	324781
bloc1s6	ENSDARG00000042933	yes	yes	yes	791215
blvra	ENSDARG00000059857	yes	yes	yes	767661
blvrb	ENSDARG00000096829	yes	yes	yes	436959
blzf1	ENSDARG00000011299	yes	yes	yes	114452
bmb	ENSDARG00000096603	yes	yes	yes	559540
bmf1	ENSDARG00000090234	yes	no	no	571949
bmf2	ENSDARG00000041414	yes	yes	yes	751764
bmi1a	ENSDARG00000006010	yes	yes	yes	321505
bmi1b	ENSDARG00000013076	yes	yes	yes	394249
bmp10	ENSDARG00000061769	yes	yes	no	562533
bmp10l	ENSDARG00000109233	yes	yes	no
bmp15	ENSDARG00000037491	yes	yes	yes	334183
bmp16	ENSDARG00000103679	yes	yes	yes	100329171
bmp1a	ENSDARG00000028071	yes	yes	yes	572452
bmp1b	ENSDARG00000028053	yes	yes	yes	559877
bmp2a	ENSDARG00000013409	yes	yes	yes	30631
bmp2b	ENSDARG00000041430	yes	yes	yes	30632
bmp2k	ENSDARG00000020009	yes	yes	yes	494101
bmp3	ENSDARG00000060526	yes	yes	no	777717
bmp4	ENSDARG00000019995	yes	yes	yes	30612
bmp5	ENSDARG00000101701	yes	yes	yes	394026
bmp6	ENSDARG00000015686	yes	yes	yes	503761
bmp7a	ENSDARG00000018260	yes	yes	yes	30584
bmp7b	ENSDARG00000063230	yes	yes	yes	557567
bmp8a	ENSDARG00000035677	yes	yes	yes	561963
bmper	ENSDARG00000101980	yes	yes	no	338246
bmpr1aa	ENSDARG00000019728	yes	yes	yes	58145
bmpr1ab	ENSDARG00000105045	yes	yes	yes	447846
bmpr1ba	ENSDARG00000104100	yes	yes	yes	30742
bmpr1bb	ENSDARG00000102742	yes	yes	yes	100149664
bmpr2a	ENSDARG00000011941	yes	yes	yes	562822
bmpr2b	ENSDARG00000020057	yes	yes	yes	555655
bms1	ENSDARG00000054154	yes	yes	yes	553241
bmt2	ENSDARG00000062181	yes	yes	yes	558558
BNC1	ENSDARG00000100757	yes	yes	yes	568786
bnc2	ENSDARG00000069989	yes	yes	yes	559327
bnip1a	ENSDARG00000078259	yes	yes	yes	565822
bnip1b	ENSDARG00000104280	yes	yes	yes	795732
bnip2	ENSDARG00000013397	yes	yes	yes	394197
bnip3	ENSDARG00000099961	yes	yes	no	336116
bnip3la	ENSDARG00000025468	yes	yes	yes	323563
bnip3lb	ENSDARG00000028067	yes	yes	yes	554650
bnip4	ENSDARG00000022832	yes	yes	yes	568155
bnipl	ENSDARG00000060435	yes	yes	yes	100149386
boc	ENSDARG00000074335	yes	yes	yes	334628
bod1	ENSDARG00000103922	yes	yes	yes	767743
bod1l1	ENSDARG00000089505	yes	yes	no	100332682
boka	ENSDARG00000052129	yes	yes	yes	445218
bokb	ENSDARG00000008807	yes	yes	yes	394160
bola1	ENSDARG00000039915	yes	yes	yes	445163
BOLA2	ENSDARG00000111714	yes	yes	yes	553698
bola3	ENSDARG00000098130	yes	yes	yes	445131
bop1	ENSDARG00000063627	yes	yes	yes	777627
bora	ENSDARG00000042688	yes	yes	yes	555606
borcs5	ENSDARG00000077830	yes	yes	yes	449650
[truncated: 30,521 more rows]

## Sheet: 2 RefSeq
RefSeq Gene Symbol	NCBI ID	annotated CDS	annotated stop codon	annotated 3' UTR	EnsdargID
a1cf	562916	yes	yes	yes	ENSDARG00000002968
a2ml	100006972	yes	yes	yes	ENSDARG00000041645
aaas	378454	yes	yes	yes	ENSDARG00000102274
aacs	393984	yes	yes	yes	ENSDARG00000012468		total Ens95 genes	29831
aadac	100148912	yes	yes	yes	ENSDARG00000063621		with annotated CDS	26120
aadacl4	569798	yes	yes	yes	ENSDARG00000044802		CDS with annotated stop	25851
aadat	557979	yes	no	no	ENSDARG00000011410		CDS with annotated 3' UTR	24540
aaed1	100332791	yes	yes	yes	ENSDARG00000075299
aagab	436696	yes	yes	yes	ENSDARG00000117041
aak1a	568999	yes	yes	yes	ENSDARG00000011855
aak1b	100534954	yes	yes	yes	ENSDARG00000077686		CDS missing stop codon	269
aamdc	553802	yes	yes	yes	ENSDARG00000103957		CDS missing 3' UTR	1580
aamp	405874	yes	yes	yes	ENSDARG00000045019
aanat1	393677	yes	yes	yes	ENSDARG00000036567
aanat2	30685	yes	yes	yes	ENSDARG00000079802
aar2	431768	yes	yes	yes	ENSDARG00000018658
aars	324940	yes	yes	yes	ENSDARG00000113882
aars2	792787	yes	yes	yes	ENSDARG00000071240
aarsd1	445178	yes	yes	yes	ENSDARG00000015747
aasdh	570338	yes	yes	yes	ENSDARG00000022730
aasdhppt	619247	yes	yes	yes	ENSDARG00000037501
aass	556229	yes	yes	yes	ENSDARG00000051816
aatf	559477	yes	yes	yes	ENSDARG00000109548
aatka	100004850	yes	yes	yes	ENSDARG00000078222
aatkb	555739	yes	yes	yes	ENSDARG00000104442
abat	378968	yes	yes	yes	ENSDARG00000006031
abca12	558335	yes	yes	yes
abca1a	558924	yes	yes	yes	ENSDARG00000074635
abca1b	100136868	yes	yes	yes	ENSDARG00000079009
abca2	100006090	yes	yes	yes	ENSDARG00000013500
abca3b	564344	yes	yes	yes	ENSDARG00000100524
abca4a	798993	yes	yes	yes	ENSDARG00000057169
abca4b	555506	yes	yes	yes	ENSDARG00000062661
abca5	100151075	yes	yes	yes	ENSDARG00000074041
abcb10	100003744	yes	yes	yes	ENSDARG00000061591
abcb11a	797269	yes	yes	yes	ENSDARG00000011573
abcb11b	571189	yes	yes	yes	ENSDARG00000070078
abcb3l1	368771	yes	yes	no	ENSDARG00000036787
abcb4	100136865	yes	yes	yes	ENSDARG00000010936
abcb5	798527	yes	yes	yes	ENSDARG00000021787
abcb6a	564067	yes	yes	yes	ENSDARG00000063297
abcb6b	100004801	yes	yes	yes	ENSDARG00000074254
abcb7	566515	yes	yes	yes	ENSDARG00000062795
abcb8	548340	yes	yes	yes	ENSDARG00000056672
abcb9	570148	yes	yes	yes	ENSDARG00000109326
abcc1	100002010	yes	yes	yes	ENSDARG00000104719
abcc10	556709	yes	yes	yes	ENSDARG00000113210
abcc12	568482	yes	yes	yes	ENSDARG00000013050
abcc13	559093	yes	yes	yes	ENSDARG00000062519
abcc2	393561	yes	yes	yes	ENSDARG00000116140
abcc3	323301	yes	yes	yes	ENSDARG00000096662
abcc4	368620	yes	yes	yes	ENSDARG00000115375
abcc5	336147	yes	yes	yes	ENSDARG00000061233
abcc6a	566555	yes	yes	yes	ENSDARG00000016750
abcc6b.2	100002917	yes	yes	yes	ENSDARG00000094901
abcc8	553281	yes	yes	yes	ENSDARG00000114458
abcc8b	100329706	yes	yes	yes	ENSDARG00000077007
abcc9	561160	yes	yes	yes	ENSDARG00000015985
abcd1	566367	yes	yes	yes	ENSDARG00000074876
abcd3a	406803	yes	yes	yes	ENSDARG00000110888
abcd3b	100170781	yes	yes	no	ENSDARG00000002947
abcd4	767748	yes	yes	yes	ENSDARG00000061770
abce1	406324	yes	yes	yes	ENSDARG00000007216
abcf1	406467	yes	yes	yes	ENSDARG00000031795
abcf2a	336770	yes	yes	yes	ENSDARG00000038785
abcf2b	100000576	yes	yes	yes	ENSDARG00000052331
abcf3	100331227	yes	yes	yes	ENSDARG00000089705
abcg1	556979	yes	yes	yes	ENSDARG00000063475
abcg2a	735312	yes	yes	yes	ENSDARG00000100075
abcg2b	570453	yes	yes	no	ENSDARG00000110043
abcg2c	569858	yes	yes	yes	ENSDARG00000058574
abcg2d	735310	yes	yes	yes	ENSDARG00000016818
abcg4a	564842	yes	yes	no	ENSDARG00000061047
abcg4b	794238	yes	yes	yes	ENSDARG00000078068
abcg5	557317	yes	yes	yes	ENSDARG00000115809
abcg8	100136850	yes	yes	yes	ENSDARG00000063059
abch1	558667	yes	yes	yes	ENSDARG00000111253
abhd10a	568517	yes	yes	yes	ENSDARG00000076435
abhd10b	492622	yes	yes	yes	ENSDARG00000116787
abhd11	446169	yes	yes	yes	ENSDARG00000069501
abhd12	767657	yes	yes	yes	ENSDARG00000071004
abhd13	561333	yes	yes	yes	ENSDARG00000059209
abhd14a	404598	yes	yes	yes	ENSDARG00000058367
abhd14b	393338	yes	yes	yes	ENSDARG00000100531
abhd15a	560644	yes	yes	yes	ENSDARG00000116294
abhd16a	564613	yes	yes	yes	ENSDARG00000078929
abhd17aa	322121	yes	yes	yes	ENSDARG00000091433
abhd17ab	100003419	yes	yes	yes	ENSDARG00000109731
abhd17b	437017	yes	yes	yes	ENSDARG00000035571
abhd17c	393126	yes	yes	yes	ENSDARG00000111161
abhd18	503769	yes	yes	yes	ENSDARG00000101961
abhd2a	393888	yes	yes	yes	ENSDARG00000025797
abhd2b	559290	yes	yes	yes	ENSDARG00000115068
abhd3	447830	yes	yes	yes	ENSDARG00000018809
abhd4	550276	yes	yes	yes	ENSDARG00000102887
abhd5a	566493	yes	yes	yes	ENSDARG00000099189
abhd6a	799085	yes	yes	yes	ENSDARG00000060756
abhd6b	558995	yes	yes	yes	ENSDARG00000111140
abhd8a	558563	yes	yes	yes
abhd8b	101883400	yes	yes	yes	ENSDARG00000111960
abi1a	393711	yes	yes	yes	ENSDARG00000010155
abi1b	767738	yes	yes	yes	ENSDARG00000062991
abi2a	767646	yes	yes	yes	ENSDARG00000111927
abi2b	692331	yes	yes	yes	ENSDARG00000014875
abi3a	767807	yes	yes	yes	ENSDARG00000060072
abi3b	566059	yes	yes	yes	ENSDARG00000063283
abi3bp	101884149	yes	yes	yes	ENSDARG00000062156
abi3bpb	100149890	yes	yes	yes	ENSDARG00000111438
abl1	100000720	yes	yes	yes	ENSDARG00000035187
abl2	570636	yes	yes	yes	ENSDARG00000013841
ablim1a	100003558	yes	yes	yes	ENSDARG00000060149
ablim1b	541550	yes	yes	yes	ENSDARG00000112629
ablim2	568454	yes	yes	yes	ENSDARG00000109680
ablim3	566821	yes	yes	yes	ENSDARG00000112071
abo	563897	yes	yes	no	ENSDARG00000019207
abraa	324520	yes	yes	yes	ENSDARG00000038583
abrab	445477	yes	yes	yes	ENSDARG00000033854
abracl	336650	yes	yes	yes	ENSDARG00000042876
abraxas2a	449820	yes	yes	yes	ENSDARG00000115196
abraxas2b	406584	yes	yes	yes	ENSDARG00000098907
abt1	553568	yes	yes	yes	ENSDARG00000043666
abtb1	100536189	yes	yes	yes	ENSDARG00000063354
abtb2a	559451	yes	yes	yes	ENSDARG00000059751
abtb2b	100007078	yes	yes	yes	ENSDARG00000111540
acaa1	431754	yes	yes	yes	ENSDARG00000004687
acaa2	406325	yes	yes	yes	ENSDARG00000038881
acaca	559403	yes	yes	yes	ENSDARG00000114071
acacb	556236	yes	yes	yes	ENSDARG00000061994
acad11	393147	yes	yes	yes	ENSDARG00000045411
acad8	394130	yes	yes	yes	ENSDARG00000116771
acad9	724002	yes	yes	yes	ENSDARG00000055620
acadl	394156	yes	yes	yes	ENSDARG00000115321
acadm	406283	yes	yes	yes	ENSDARG00000038900
acads	445288	yes	yes	yes	ENSDARG00000030781
acadsb	100037342	yes	yes	yes	ENSDARG00000098174
acadvl	573723	yes	yes	yes	ENSDARG00000016687
acana	497505	yes	yes	yes	ENSDARG00000035891
acanb	559593	yes	yes	yes	ENSDARG00000113408
acap1	561771	yes	yes	yes	ENSDARG00000109603
acap2	100124613	yes	yes	yes	ENSDARG00000060783
acap3a	322991	yes	yes	yes	ENSDARG00000075990
acap3b	100009646	yes	yes	yes	ENSDARG00000099240
acat1	445290	yes	yes	yes	ENSDARG00000045888
acat2	30643	yes	yes	yes	ENSDARG00000007127
acbd3	406270	yes	yes	yes	ENSDARG00000042623
acbd4	406368	yes	yes	yes	ENSDARG00000027070
acbd5a	553674	yes	yes	yes	ENSDARG00000034883
acbd5b	100004736	yes	yes	yes	ENSDARG00000058410
acbd6	324090	yes	yes	yes	ENSDARG00000039456
acbd7	619256	yes	yes	yes	ENSDARG00000094730
accs	541510	yes	yes	yes	ENSDARG00000052124
acd	794664	yes	yes	yes	ENSDARG00000078055
ace	565980	yes	yes	yes	ENSDARG00000079166
ace2	492331	yes	yes	yes	ENSDARG00000016918
acer1	550266	yes	yes	yes	ENSDARG00000010347
acer2	100331179	yes	yes	yes	ENSDARG00000077782
acer3	555411	yes	yes	yes	ENSDARG00000093366
ache	114549	yes	yes	yes	ENSDARG00000031796
acin1a	368893	yes	yes	yes	ENSDARG00000111685
acin1b	327495	yes	yes	yes	ENSDARG00000026842
ackr3a	100000764	yes	yes	yes	ENSDARG00000062478
ackr3b	561050	yes	yes	yes	ENSDARG00000113530
ackr4a	100003167	yes	yes	yes	ENSDARG00000078729
ackr4b	641390	yes	yes	yes	ENSDARG00000040133
aclya	436922	yes	yes	yes	ENSDARG00000099079
aclyb	794259	yes	yes	yes	ENSDARG00000055652
acmsd	557166	yes	yes	yes	ENSDARG00000062549
aco1	568448	yes	yes	yes	ENSDARG00000026376
aco2	322670	yes	yes	yes	ENSDARG00000111879
acot11a	554842	yes	yes	yes	ENSDARG00000058229
acot11b	641574	yes	yes	yes	ENSDARG00000042122
acot12	100536873	yes	yes	yes	ENSDARG00000054534
acot13	564010	yes	yes	yes	ENSDARG00000114746
acot14	557184	yes	yes	yes	ENSDARG00000110067
acot15	557032	yes	yes	yes	ENSDARG00000111748
acot16	402867	yes	yes	yes	ENSDARG00000113784
acot17	572757	yes	yes	yes	ENSDARG00000112174
acot18	556673	yes	yes	yes	ENSDARG00000112227
acot19	492778	yes	yes	yes	ENSDARG00000040427
acot20	553440	yes	yes	yes	ENSDARG00000042510
acot21	562047	yes	yes	yes	ENSDARG00000042513
acot22	553217	yes	yes	yes	ENSDARG00000058945
acot7	447878	yes	yes	yes	ENSDARG00000018653
acot8	450052	yes	yes	yes	ENSDARG00000014138
acot9.1	798073	yes	yes	yes	ENSDARG00000114328
acot9.2	798008	yes	yes	yes	ENSDARG00000113544
acox1	449662	yes	yes	yes	ENSDARG00000014727
acox3	406421	yes	yes	yes	ENSDARG00000038865
acoxl	569104	yes	yes	yes	ENSDARG00000020149
acp1	541489	yes	yes	yes	ENSDARG00000076486
acp2	503759	yes	no	no	ENSDARG00000007244
acp5a	406801	yes	yes	yes	ENSDARG00000111996
acp5b	436725	yes	yes	yes	ENSDARG00000109721
acp6	558758	yes	yes	yes	ENSDARG00000040064
acrc	541448	yes	yes	yes	ENSDARG00000101060
acsbg1	100006023	yes	yes	yes	ENSDARG00000062077
acsbg2	335159	yes	yes	yes	ENSDARG00000004094
acsf2	751707	yes	yes	yes	ENSDARG00000061201
acsf3	562292	yes	yes	yes	ENSDARG00000114624
acsl1a	555308	yes	yes	yes	ENSDARG00000109220
acsl1b	445175	yes	yes	yes	ENSDARG00000003854
acsl2	100332846	yes	yes	no	ENSDARG00000078399
acsl3a	567157	yes	yes	yes	ENSDARG00000032079
acsl3b	559656	yes	yes	yes	ENSDARG00000014674
acsl4a	393622	yes	yes	yes	ENSDARG00000004078
acsl4b	334561	yes	yes	yes	ENSDARG00000010752
acsl5	447860	yes	yes	yes	ENSDARG00000075931
acsl6	566863	yes	yes	yes
acsm3	100002035	yes	yes	yes	ENSDARG00000004880
acss1	541435	yes	yes	yes	ENSDARG00000109700
acss2	436914	yes	yes	yes	ENSDARG00000112371
acss2l	560020	yes	yes	yes	ENSDARG00000069029
acss3	566019	yes	yes	yes	ENSDARG00000032218
acta1a	550445	yes	yes	yes	ENSDARG00000036371
acta1b	407658	yes	yes	yes	ENSDARG00000055618
acta2	322509	yes	yes	yes	ENSDARG00000045180
actb1	57934	yes	yes	yes	ENSDARG00000113649
actb2	57935	yes	yes	yes	ENSDARG00000037870
actc1a	408256	yes	yes	yes	ENSDARG00000042535
actc1b	58114	yes	yes	yes	ENSDARG00000099197
actl6a	192313	yes	yes	yes	ENSDARG00000115348
actl6b	553775	yes	yes	yes	ENSDARG00000034107
actn1	560400	yes	yes	yes	ENSDARG00000007219
actn2a	100538165	yes	yes	yes
actn2b	641575	yes	yes	yes	ENSDARG00000111435
actn3a	58037	yes	yes	yes	ENSDARG00000111128
actn3b	323320	yes	yes	yes	ENSDARG00000001431
actn4	322221	yes	yes	yes	ENSDARG00000099786
actr1	406681	yes	yes	yes	ENSDARG00000011611
actr10	393139	yes	yes	yes	ENSDARG00000038432
actr2a	406820	yes	yes	yes	ENSDARG00000052438
actr2b	554861	yes	yes	yes	ENSDARG00000070076
actr3	406250	yes	no	no	ENSDARG00000091138
actr3b	100038776	yes	yes	yes	ENSDARG00000008790
actr5	406809	yes	yes	yes	ENSDARG00000098235
actr6	324822	yes	yes	yes	ENSDARG00000021370
actr8	326866	yes	yes	yes	ENSDARG00000103610
acvr1ba	30183	yes	yes	yes	ENSDARG00000018968
acvr1bb	559222	yes	yes	yes	ENSDARG00000052142
acvr1c	100331105	yes	yes	yes	ENSDARG00000086172
acvr1l	30615	yes	yes	yes	ENSDARG00000014986
acvr2aa	553359	yes	yes	yes	ENSDARG00000011188
acvr2ab	100331014	yes	yes	yes	ENSDARG00000104700
acvr2b	30457	yes	yes	yes	ENSDARG00000044422
acvrl1	266753	yes	yes	yes	ENSDARG00000018179
acy1	393970	yes	yes	yes	ENSDARG00000038475
acy3.1	791456	yes	yes	yes	ENSDARG00000093003
acy3.2	436619	yes	yes	yes	ENSDARG00000005525
acyp1	571263	yes	yes	yes	ENSDARG00000060126
acyp2	101886626	yes	yes	yes	ENSDARG00000086271
ada	436919	yes	yes	yes	ENSDARG00000003113
adad1	564818	yes	yes	yes	ENSDARG00000089181
adad2	558824	yes	yes	yes	ENSDARG00000105626
adal	619263	yes	yes	yes	ENSDARG00000111306
adam10a	566044	yes	yes	yes	ENSDARG00000053468
adam10b	393392	yes	yes	yes	ENSDARG00000015502
adam11	567145	yes	yes	yes	ENSDARG00000079204
adam12	101884222	yes	yes	yes	ENSDARG00000116062
adam12	563275	yes	yes	yes	ENSDARG00000079068
adam15	795199	yes	yes	yes	ENSDARG00000089213
adam17a	324142	yes	yes	yes	ENSDARG00000043213
adam17b	560657	yes	yes	yes	ENSDARG00000093093
adam19a	565342	yes	yes	yes
adam19b	571252	yes	yes	yes	ENSDARG00000067545
adam22	100126805	yes	yes	yes	ENSDARG00000060532
adam23a	794175	yes	yes	yes	ENSDARG00000062323
adam28	767749	yes	yes	yes	ENSDARG00000109685
adam8a	368917	yes	yes	yes	ENSDARG00000001452
adam8b	100005593	yes	yes	yes	ENSDARG00000057644
adam9	447940	yes	yes	yes	ENSDARG00000010070
adamts1	565145	yes	yes	yes	ENSDARG00000103519
adamts10	564734	yes	yes	yes	ENSDARG00000075188
adamts12	100003937	yes	yes	yes	ENSDARG00000067549
adamts13	100320289	yes	yes	yes	ENSDARG00000076270
adamts15a	569571	yes	yes	no	ENSDARG00000111736
adamts17	101884120	yes	no	yes	ENSDARG00000075555
adamts18	100150128	yes	yes	yes	ENSDARG00000001999
adamts2	571682	yes	yes	yes	ENSDARG00000075930
adamts3	102467218	yes	yes	yes	ENSDARG00000060127
adamts5	565053	yes	yes	no	ENSDARG00000100307
adamts6	569099	yes	yes	yes	ENSDARG00000041982
adamts7	560364	yes	yes	yes	ENSDARG00000102478
adamts8a	569618	yes	yes	yes	ENSDARG00000115086
adamts9	100333407	yes	yes	no	ENSDARG00000077778
adamtsl2	100537087	yes	yes	yes	ENSDARG00000074033
adamtsl3	100534944	yes	yes	yes	ENSDARG00000027903
adamtsl4	100333903	yes	yes	yes	ENSDARG00000063407
adamtsl5	101886605	yes	yes	yes	ENSDARG00000052118
adamtsl7	556634	yes	yes	yes	ENSDARG00000055439
adap2	100331455	yes	yes	yes	ENSDARG00000070565
adar	58119	yes	yes	yes	ENSDARG00000012389
adarb1a	58134	yes	yes	yes	ENSDARG00000041609
adarb1b	558759	yes	yes	yes	ENSDARG00000003544
adarb2	558149	yes	yes	yes	ENSDARG00000071823
adat1	792614	yes	yes	yes	ENSDARG00000061348
adat2	100034610	yes	yes	yes	ENSDARG00000041944
adat3	368634	yes	yes	yes	ENSDARG00000005640
adck1	100144553	yes	yes	yes	ENSDARG00000062561
adck2	572087	yes	yes	yes	ENSDARG00000112576
adck3	437001	yes	yes	yes	ENSDARG00000020123
adck4	799071	yes	yes	yes	ENSDARG00000113287
adck5	100001584	yes	yes	yes	ENSDARG00000075405
adcy1a	557026	yes	yes	yes	ENSDARG00000069026
adcy1b	569499	yes	yes	yes	ENSDARG00000088634
adcy2a	563724	yes	yes	yes	ENSDARG00000058392
adcy2b	557902	yes	yes	yes	ENSDARG00000014588
adcy3a	571825	yes	yes	yes	ENSDARG00000077145
adcy3b	564719	no	no	no	ENSDARG00000017437
adcy5	562619	yes	yes	yes	ENSDARG00000091342
adcy6a	570652	yes	yes	yes	ENSDARG00000114782
adcy6b	560807	yes	yes	yes	ENSDARG00000111136
adcy7	568726	yes	yes	yes	ENSDARG00000060070
adcy8	100148976	yes	yes	yes	ENSDARG00000031783
adcy9	100333702	yes	yes	yes	ENSDARG00000100869
adcyap1a	259257	yes	yes	yes	ENSDARG00000004015
adcyap1b	335625	yes	yes	yes	ENSDARG00000027740
adcyap1r1a	541315	yes	yes	yes	ENSDARG00000105201
adcyap1r1b	555473	yes	yes	yes	ENSDARG00000113350
add1	555511	yes	yes	yes	ENSDARG00000103962
add2	570147	yes	yes	yes	ENSDARG00000074581
add3a	556762	yes	yes	yes	ENSDARG00000040874
add3b	553243	yes	yes	yes	ENSDARG00000114699
adgb	555435	yes	yes	yes	ENSDARG00000005595
adgra1	101884141	yes	yes	yes
adgra1a	560847	yes	yes	yes	ENSDARG00000113675
adgra2	560700	yes	yes	no	ENSDARG00000076994
adgra3	100003592	yes	yes	no
adgrb1a	563527	yes	yes	yes	ENSDARG00000075133
adgrb1b	100302472	no	no	no	ENSDARG00000078529
adgrb2	556993	yes	no	yes
adgrb3	566117	yes	yes	yes	ENSDARG00000059832
adgrd1	791731	yes	yes	yes
adgrd2	571770	yes	yes	yes	ENSDARG00000103067
adgre10	569655	yes	yes	yes	ENSDARG00000075855
adgre13	100538238	no	no	no
adgre14	108182849	yes	yes	yes	ENSDARG00000056062
adgre15	100536619	yes	yes	yes	ENSDARG00000096588
adgre5b.2	101882660	yes	yes	yes	ENSDARG00000104083
adgre5b.3	792970	yes	yes	yes	ENSDARG00000089904
adgre9	101883848	yes	yes	yes	ENSDARG00000096577
adgrf11	100537132	yes	yes	yes	ENSDARG00000075134
adgrf3a	101886922	yes	yes	yes	ENSDARG00000087870
adgrf3b	565465	yes	yes	yes	ENSDARG00000093008
adgrf6	565101	yes	yes	yes	ENSDARG00000042829
adgrf7	613165	yes	yes	yes
adgrf8	100537224	yes	yes	yes	ENSDARG00000093316
adgrg1	324948	yes	yes	yes	ENSDARG00000027222
adgrg11	563883	yes	yes	yes	ENSDARG00000041413
adgrg2a	101882832	yes	yes	yes	ENSDARG00000088137
adgrg3	799479	yes	yes	yes	ENSDARG00000074782
adgrg4a	793963	yes	yes	yes	ENSDARG00000105416
adgrg6	561970	yes	yes	no	ENSDARG00000054137
adgrg7.1	101882620	yes	yes	yes
adgrl1.1	100334775	yes	yes	yes
adgrl1a	562531	yes	yes	yes	ENSDARG00000089292
adgrl2a	57987	yes	yes	yes	ENSDARG00000069356
adgrl3.1	560631	yes	yes	yes	ENSDARG00000061121
adgrl4	406676	yes	yes	yes	ENSDARG00000013653
adgrv1	415105	yes	yes	yes	ENSDARG00000021137
adh5	116517	yes	yes	yes	ENSDARG00000111574
adh8a	322482	yes	yes	yes	ENSDARG00000113750
adh8b	402841	yes	yes	yes	ENSDARG00000116820
adhfe1	404618	yes	yes	yes	ENSDARG00000053518
adi1	324079	yes	yes	yes	ENSDARG00000020448
adipoqa	562602	yes	yes	yes	ENSDARG00000062228
adipoqb	751715	yes	yes	yes	ENSDARG00000100086
adipor1a	436740	yes	yes	yes	ENSDARG00000113136
adipor1b	406821	yes	yes	yes	ENSDARG00000042717
adipor2	560140	yes	yes	yes	ENSDARG00000101849
adka	368220	yes	yes	yes	ENSDARG00000039429
adkb	322229	yes	yes	yes	ENSDARG00000095947
adm2a	403114	yes	yes	yes	ENSDARG00000111740
adm2b	100322075	yes	yes	yes	ENSDARG00000078875
adma	556502	yes	yes	yes	ENSDARG00000015263
admb	570100	yes	yes	yes	ENSDARG00000069027
admp	140619	yes	yes	yes	ENSDARG00000025372
adnp2a	100007394	yes	yes	yes	ENSDARG00000060937
adnp2b	564171	yes	yes	yes	ENSDARG00000028431
adnpa	564637	yes	yes	yes	ENSDARG00000115617
adnpb	100330315	yes	yes	yes	ENSDARG00000115866
adoa	494091	yes	yes	yes	ENSDARG00000042827
adob	406474	yes	yes	yes	ENSDARG00000053571
adora1b	100150997	yes	yes	no	ENSDARG00000075694
adora2aa	561701	yes	yes	yes	ENSDARG00000114856
adora2ab	566118	yes	yes	yes	ENSDARG00000058488
adora2b	560100	yes	yes	yes	ENSDARG00000002533
adpgk	557919	yes	yes	yes	ENSDARG00000115539
adpgk2	566398	yes	yes	yes	ENSDARG00000062785
adprh	445059	yes	yes	yes	ENSDARG00000040712
adprhl1	450012	yes	yes	yes	ENSDARG00000041589
adprhl2	796446	yes	yes	yes	ENSDARG00000110712
adprm	393393	yes	yes	yes	ENSDARG00000026090
adra1aa	798498	yes	yes	yes	ENSDARG00000028725
adra1ab	557259	yes	yes	yes	ENSDARG00000027638
adra1ba	100149100	yes	yes	yes	ENSDARG00000011317
adra1bb	492486	yes	yes	yes	ENSDARG00000116032
adra1d	568614	yes	yes	yes	ENSDARG00000024101
adra2a	266750	yes	yes	yes	ENSDARG00000111717
adra2b	266751	yes	yes	no	ENSDARG00000102096
adra2c	266752	yes	yes	no	ENSDARG00000110072
adra2da	266754	yes	yes	yes	ENSDARG00000091277
adra2db	266755	yes	yes	no	ENSDARG00000116585
adrb1	557194	yes	yes	yes	ENSDARG00000115574
adrb2a	565838	yes	yes	no	ENSDARG00000088124
adrb2b	100037315	yes	yes	yes	ENSDARG00000111730
adrb3a	558248	yes	yes	yes	ENSDARG00000053646
adrb3b	792519	yes	yes	yes	ENSDARG00000052919
adrbk2	569403	yes	yes	yes	ENSDARG00000104094
adrm1	796450	yes	yes	yes	ENSDARG00000113912
adsl	334431	yes	yes	yes	ENSDARG00000111547
adss	550502	yes	yes	yes	ENSDARG00000002071
adssl	192305	yes	yes	yes	ENSDARG00000012399
adssl1	407989	yes	yes	yes	ENSDARG00000099517
aebp1	793308	yes	yes	yes	ENSDARG00000091726
aebp2	406815	yes	yes	yes	ENSDARG00000006038
aep1	503710	yes	yes	yes	ENSDARG00000039099
aes	393395	yes	yes	yes	ENSDARG00000115836
afap1	568356	yes	yes	yes	ENSDARG00000113963
afap1l1a	566757	yes	yes	yes	ENSDARG00000116849
afap1l1b	768144	yes	yes	yes	ENSDARG00000056453
afap1l2	567369	yes	yes	yes	ENSDARG00000074806
aff1	100537394	yes	yes	yes
aff2	100330019	yes	yes	yes	ENSDARG00000052242
aff3	570215	yes	yes	yes	ENSDARG00000079575
aff4	556421	yes	yes	yes	ENSDARG00000001857
afg1la	561238	yes	yes	yes	ENSDARG00000011466
afg1lb	555926	yes	yes	yes	ENSDARG00000042902
afg3l2	569168	yes	yes	yes	ENSDARG00000062272
afmid	550372	yes	yes	yes	ENSDARG00000099106
afp4	568707	yes	yes	yes	ENSDARG00000095863
aftpha	556043	yes	yes	yes	ENSDARG00000069249
aftphb	100004990	yes	yes	yes	ENSDARG00000071347
aga	566517	yes	yes	yes	ENSDARG00000114305
agap1	100148154	yes	yes	yes	ENSDARG00000113863
agap2	565109	yes	yes	yes	ENSDARG00000099874
agap3	324332	yes	yes	yes	ENSDARG00000087822
agbl1	100536841	yes	yes	yes	ENSDARG00000104384
agbl2	568152	yes	yes	yes	ENSDARG00000079983
agbl4	550450	yes	yes	yes	ENSDARG00000068050
agbl5	445479	yes	yes	yes	ENSDARG00000045900
agfg1a	327597	yes	yes	yes	ENSDARG00000030020
agfg1b	393560	yes	yes	yes	ENSDARG00000019526
aggf1	559905	yes	yes	yes	ENSDARG00000060109
agk	334270	yes	yes	yes	ENSDARG00000113514
agla	567798	yes	yes	yes	ENSDARG00000103811
aglb	553352	yes	yes	yes	ENSDARG00000100352
agmat	556522	yes	yes	yes	ENSDARG00000059700
agmo	405819	yes	yes	yes	ENSDARG00000025595
ago1	570775	yes	yes	yes	ENSDARG00000092644
ago2	570630	yes	yes	yes	ENSDARG00000061268
ago3b	568159	yes	yes	yes	ENSDARG00000063079
ago4	100535764	yes	yes	yes	ENSDARG00000100854
agpat2	777624	yes	yes	yes	ENSDARG00000101139
agpat3	406734	yes	yes	yes	ENSDARG00000036549
agpat4	406265	yes	yes	yes	ENSDARG00000069044
agpat5	767778	yes	yes	yes	ENSDARG00000063187
agpat9l	567414	yes	yes	yes	ENSDARG00000112415
agps	386801	yes	yes	yes	ENSDARG00000042821
agr1	335309	yes	yes	yes	ENSDARG00000060682
agr2	335616	yes	yes	yes	ENSDARG00000070480
agrn	565373	yes	yes	yes	ENSDARG00000110127
agrp	100149042	yes	yes	yes	ENSDARG00000116610
agt	322485	yes	yes	yes	ENSDARG00000016412
agtpbp1	554164	yes	yes	yes	ENSDARG00000105214
agtr1a	794575	yes	yes	yes	ENSDARG00000018616
agtr1b	100333455	yes	yes	yes	ENSDARG00000045443
agtr2	503772	yes	yes	yes	ENSDARG00000035552
agtrap	793937	yes	yes	yes	ENSDARG00000114680
agxt2	619269	yes	yes	yes	ENSDARG00000100709
agxta	436603	yes	yes	yes	ENSDARG00000052099
agxtb	79378	yes	yes	yes	ENSDARG00000018478
ahctf1	553494	yes	yes	yes	ENSDARG00000077530
ahcy	387530	yes	yes	yes	ENSDARG00000005191
ahcyl1	798918	yes	yes	yes	ENSDARG00000056331
ahcyl2	394240	yes	yes	yes	ENSDARG00000039343
ahdc1	100536210	yes	yes	yes	ENSDARG00000093453
ahi1	562701	yes	yes	yes	ENSDARG00000044056
ahnak	559276	yes	yes	yes	ENSDARG00000061764
ahr1a	246224	yes	yes	yes	ENSDARG00000020046
ahr1b	554265	yes	yes	yes	ENSDARG00000023537
ahr2	30517	yes	yes	yes	ENSDARG00000021833
ahrra	641291	yes	yes	yes	ENSDARG00000099702
ahrrb	565319	yes	yes	yes	ENSDARG00000116560
ahsa1a	565968	yes	yes	yes	ENSDARG00000028664
ahsa1b	321945	yes	yes	yes	ENSDARG00000100317
ahsg1	569558	yes	yes	yes	ENSDARG00000026764
ahsg2	567406	yes	yes	yes	ENSDARG00000069293
aicda	493784	yes	yes	yes	ENSDARG00000015734
aida	393763	yes	yes	yes	ENSDARG00000014532
aif1l	321033	yes	yes	yes	ENSDARG00000009336
aifm1	373125	yes	yes	yes	ENSDARG00000117164
aifm2	557507	yes	yes	yes	ENSDARG00000077549
aifm3	100150876	yes	yes	yes	ENSDARG00000062780
aifm4	791218	yes	yes	yes	ENSDARG00000061634
aifm5	557064	yes	yes	yes	ENSDARG00000075551
aig1	562261	yes	yes	yes	ENSDARG00000007171
aim1a	556848	yes	yes	yes	ENSDARG00000031782
aim1b	566781	yes	yes	yes	ENSDARG00000006060
aimp1	562232	yes	yes	yes	ENSDARG00000060036
aimp2	406647	yes	yes	yes	ENSDARG00000018903
aip	334795	yes	yes	yes	ENSDARG00000104437
aipl1	100537095	yes	yes	yes	ENSDARG00000110493
aire	100007662	yes	yes	yes	ENSDARG00000056784
ajap1	101887016	yes	yes	yes	ENSDARG00000038655
ajuba	572549	yes	yes	yes	ENSDARG00000077842
ak1	445486	yes	yes	yes	ENSDARG00000001950
ak2	321793	yes	yes	yes	ENSDARG00000005926
ak3	406404	yes	yes	yes	ENSDARG00000058226
ak4	406590	yes	yes	yes	ENSDARG00000006546
ak5	100003595	yes	yes	no	ENSDARG00000012555
ak5l	548336	yes	yes	yes	ENSDARG00000017739
ak7a	402854	yes	yes	yes	ENSDARG00000019001
ak7b	504040	yes	yes	yes	ENSDARG00000017023
ak8	553671	yes	yes	yes	ENSDARG00000113361
akap10	566920	yes	yes	yes	ENSDARG00000059549
akap11	558595	yes	yes	yes	ENSDARG00000075435
akap12a	101885554	yes	yes	yes	ENSDARG00000091792
akap12b	567365	yes	yes	yes	ENSDARG00000110544
akap13	108190639	yes	yes	yes	ENSDARG00000023868
akap17a	393655	yes	yes	yes	ENSDARG00000104768
akap1a	100002545	yes	yes	yes	ENSDARG00000089802
akap1b	556208	yes	yes	yes	ENSDARG00000006062
akap6	100002625	yes	yes	yes	ENSDARG00000077295
akap7	101885028	yes	yes	yes
akap8l	406500	yes	yes	yes	ENSDARG00000099635
akap9	565037	yes	yes	yes	ENSDARG00000079610
akip1	562301	yes	yes	yes	ENSDARG00000115020
akirin1	406432	yes	yes	yes	ENSDARG00000116670
akirin2	406855	yes	yes	yes	ENSDARG00000058729
akna	556113	yes	yes	yes	ENSDARG00000087110
aknad1	100003458	yes	yes	yes
akr1a1a	445326	yes	yes	yes	ENSDARG00000109404
akr1a1b	799805	yes	yes	yes	ENSDARG00000112549
akr1b1	415138	yes	yes	yes	ENSDARG00000006215
akr7a3	436642	yes	yes	yes	ENSDARG00000016649
akt1	101910198	yes	yes	yes
akt1s1	566559	yes	yes	yes	ENSDARG00000074667
akt2	378972	yes	yes	yes	ENSDARG00000011219
akt2l	403146	yes	yes	yes	ENSDARG00000103612
akt3a	560549	yes	yes	yes	ENSDARG00000104810
akt3b	100149794	yes	yes	yes	ENSDARG00000087205
aktip	378716	yes	yes	yes	ENSDARG00000115058
alad	550338	yes	yes	yes	ENSDARG00000100372
alas1	64608	yes	yes	yes	ENSDARG00000021059
alas2	64607	yes	yes	yes	ENSDARG00000113125
alcama	30194	yes	yes	yes	ENSDARG00000116648
alcamb	323919	yes	yes	yes	ENSDARG00000058538
aldh16a1	492710	yes	yes	yes	ENSDARG00000037935
aldh18a1	557186	yes	yes	yes	ENSDARG00000099579
aldh1a2	116713	yes	yes	yes	ENSDARG00000113122
aldh1a3	751785	yes	yes	yes	ENSDARG00000076933
aldh1l1	100526683	yes	yes	no	ENSDARG00000114342
aldh1l2	100333269	yes	yes	yes	ENSDARG00000070230
aldh2.1	393462	yes	yes	yes	ENSDARG00000089924
aldh2.2	368239	yes	yes	yes	ENSDARG00000028087
aldh3a1	100000026	yes	yes	yes	ENSDARG00000074791
aldh3a2a	323653	yes	yes	yes	ENSDARG00000028259
aldh3a2b	447920	yes	yes	yes	ENSDARG00000029381
aldh3b1	282559	yes	yes	yes	ENSDARG00000013839
aldh3b2	557008	yes	yes	yes	ENSDARG00000035606
aldh4a1	394133	yes	yes	yes	ENSDARG00000038207
aldh5a1	565235	yes	yes	yes	ENSDARG00000113300
aldh6a1	436647	yes	yes	yes	ENSDARG00000053485
aldh7a1	334197	yes	yes	yes	ENSDARG00000018426
aldh8a1	447801	yes	yes	yes	ENSDARG00000115119
aldh9a1a.1	100005587	yes	yes	yes	ENSDARG00000114905
aldh9a1a.2	100006238	yes	yes	yes	ENSDARG00000117162
aldh9a1b	399481	yes	yes	yes	ENSDARG00000037061
aldoaa	336425	yes	yes	yes	ENSDARG00000011665
aldoab	406496	yes	yes	yes	ENSDARG00000034470
aldob	321664	yes	yes	yes	ENSDARG00000053684
aldoca	792692	yes	yes	yes	ENSDARG00000111344
aldocb	369193	yes	yes	yes	ENSDARG00000019702
alg1	334161	yes	yes	yes	ENSDARG00000054963
alg10	100331575	yes	yes	yes	ENSDARG00000053917
alg11	407614	yes	yes	yes	ENSDARG00000110001
alg12	569494	yes	yes	yes	ENSDARG00000111299
alg13	557181	yes	yes	yes	ENSDARG00000054374
alg14	450072	yes	yes	yes	ENSDARG00000116808
alg2	403068	yes	yes	yes	ENSDARG00000070399
alg3	553725	yes	yes	yes	ENSDARG00000053155
alg5	751635	yes	yes	yes	ENSDARG00000061235
alg6	445327	yes	yes	yes	ENSDARG00000017617
alg8	327601	yes	yes	yes	ENSDARG00000114612
alg9	393598	yes	yes	yes	ENSDARG00000012840
alk	563509	yes	yes	yes	ENSDARG00000095833
alkbh1	553720	yes	yes	yes	ENSDARG00000071164
alkbh2	569291	yes	yes	yes	ENSDARG00000115064
alkbh3	792266	yes	yes	yes	ENSDARG00000045606
alkbh4	553475	yes	yes	yes	ENSDARG00000052247
alkbh5	570158	yes	yes	yes	ENSDARG00000063003
alkbh6	317736	yes	yes	yes	ENSDARG00000077253
alkbh7	550272	yes	yes	yes	ENSDARG00000037906
alkbh8	556362	yes	yes	yes	ENSDARG00000060256
allc	436989	yes	yes	yes	ENSDARG00000042562
alms1	561882	yes	yes	yes	ENSDARG00000074779
alox12	322732	yes	yes	yes	ENSDARG00000069463
alox5a	567204	yes	yes	yes	ENSDARG00000110148
alox5ap	337376	yes	yes	yes	ENSDARG00000113460
alox5b.1	573013	yes	yes	yes	ENSDARG00000043085
alox5b.2	724056	yes	yes	yes	ENSDARG00000043089
alox5b.3	553602	yes	yes	yes	ENSDARG00000069966
alp3	100330410	yes	yes	no	ENSDARG00000098063
alpi.1	541539	yes	yes	yes	ENSDARG00000015273
alpi.2	574009	yes	yes	yes	ENSDARG00000053774
alpk1	100333928	yes	yes	yes
alpk2	559835	yes	yes	yes	ENSDARG00000079637
alpk3a	100321139	yes	yes	yes	ENSDARG00000078989
alpk3b	100534893	yes	yes	yes	ENSDARG00000105630
alpl	393982	yes	yes	yes	ENSDARG00000015546
als2a	557014	yes	yes	yes	ENSDARG00000112274
als2b	100318899	yes	yes	yes	ENSDARG00000076924
alx1	565176	yes	yes	no	ENSDARG00000110530
alx3	566955	yes	yes	yes
alx4a	100006399	yes	yes	yes	ENSDARG00000088332
alx4b	497424	yes	yes	yes	ENSDARG00000074442
alyref	560127	yes	yes	yes	ENSDARG00000077732
amacr	553653	yes	yes	yes	ENSDARG00000117070
ambp	394093	yes	yes	yes	ENSDARG00000112731
ambra1a	100332642	yes	yes	yes	ENSDARG00000008322
ambra1b	559106	yes	yes	yes	ENSDARG00000039878
amd1	792097	yes	yes	yes	ENSDARG00000111778
amdhd2	402981	yes	yes	yes	ENSDARG00000100376
amer1	100885784	yes	yes	yes	ENSDARG00000079624
amer2	100101649	yes	yes	yes	ENSDARG00000075222
amfr	406442	yes	yes	yes	ENSDARG00000020218
amfrb	101884807	yes	yes	yes	ENSDARG00000105578
amh	493624	yes	yes	yes	ENSDARG00000014357
amigo1	100144409	yes	yes	yes	ENSDARG00000079620
amigo3	100000131	yes	yes	yes	ENSDARG00000074469
ammecr1	393553	yes	yes	yes	ENSDARG00000012892
amn	793454	yes	yes	yes	ENSDARG00000062947
amn1	751744	yes	yes	yes	ENSDARG00000111705
amot	563421	yes	yes	yes	ENSDARG00000078335
amotl1	101884950	yes	yes	yes	ENSDARG00000019442
amotl2a	558920	yes	yes	yes	ENSDARG00000061923
amotl2b	559784	yes	yes	yes	ENSDARG00000061948
ampd1	393867	yes	yes	yes	ENSDARG00000033832
ampd2a	100330772	yes	yes	yes	ENSDARG00000104491
ampd2b	571355	yes	yes	yes	ENSDARG00000029952
ampd3a	556578	yes	yes	yes	ENSDARG00000005800
ampd3b	333997	yes	yes	yes	ENSDARG00000117191
amph	393804	yes	yes	yes	ENSDARG00000007663
amt	450000	yes	yes	yes	ENSDARG00000010862
amy2a	406539	yes	yes	yes	ENSDARG00000013856
anapc1	568795	yes	yes	yes	ENSDARG00000075687
anapc10	798352	yes	yes	yes	ENSDARG00000090152
anapc11	768140	yes	yes	yes	ENSDARG00000116987
anapc13	569473	yes	yes	yes	ENSDARG00000078435
anapc15	751740	yes	yes	yes	ENSDARG00000101285
anapc16	550576	yes	yes	yes	ENSDARG00000013822
anapc2	100318335	yes	yes	yes	ENSDARG00000105035
anapc4	494046	yes	yes	yes	ENSDARG00000032237
anapc5	322854	yes	yes	yes	ENSDARG00000008461
anapc7	558402	yes	yes	no	ENSDARG00000063005
and1	794315	yes	yes	yes	ENSDARG00000088514
and2	566702	yes	yes	yes	ENSDARG00000079302
and3	561047	yes	yes	yes	ENSDARG00000056873
and4	100192207	no	no	no
angel1	569547	yes	yes	yes	ENSDARG00000077567
angel2	562704	yes	yes	yes	ENSDARG00000016743
angpt1	114407	yes	yes	yes	ENSDARG00000030364
angpt2a	101101687	yes	yes	no	ENSDARG00000014946
angpt2b	114408	yes	yes	yes	ENSDARG00000053906
angpt4	571050	yes	yes	yes	ENSDARG00000076787
angptl1a	544656	yes	yes	yes	ENSDARG00000012071
angptl1b	334311	yes	yes	yes	ENSDARG00000100159
angptl2a	569092	yes	yes	yes	ENSDARG00000024030
angptl2b	503514	yes	yes	yes	ENSDARG00000068369
angptl3	114421	yes	yes	yes	ENSDARG00000044365
angptl4	492647	yes	yes	yes	ENSDARG00000035859
angptl5	566212	yes	yes	yes	ENSDARG00000056630
angptl6	561927	yes	yes	yes	ENSDARG00000020265
angptl7	450053	yes	yes	yes	ENSDARG00000110344
ank1a	449796	yes	yes	yes	ENSDARG00000092143
ank1b	797662	yes	yes	yes	ENSDARG00000116496
ank2a	568926	yes	yes	yes	ENSDARG00000110704
ank2b	450043	yes	yes	yes	ENSDARG00000043313
ank3a	103909035	yes	yes	yes	ENSDARG00000111919
ank3b	100126016	yes	yes	yes
ankar	368636	yes	yes	yes	ENSDARG00000000516
ankdd1a	569271	yes	yes	yes	ENSDARG00000098647
ankdd1b	562681	yes	yes	yes	ENSDARG00000025866
ankef1a	566413	yes	yes	yes	ENSDARG00000019135
ankef1b	100149106	yes	yes	yes	ENSDARG00000060211
ankfy1	568480	yes	yes	yes	ENSDARG00000111387
ankha	571148	yes	yes	yes	ENSDARG00000071724
ankhb	323738	yes	yes	yes	ENSDARG00000014969
ankhd1	563327	yes	yes	yes	ENSDARG00000077860
ankib1a	566524	yes	yes	yes	ENSDARG00000060768
ankib1b	561277	yes	yes	yes	ENSDARG00000076829
ankk1	100170831	yes	yes	yes	ENSDARG00000056921
ankle2	559297	yes	yes	yes	ENSDARG00000035607
ankmy1	568987	yes	yes	yes	ENSDARG00000062702
ankmy2a	334389	yes	yes	yes	ENSDARG00000005948
ankra2	406403	yes	yes	yes	ENSDARG00000111289
ankrd10a	393955	yes	yes	yes	ENSDARG00000037100
ankrd10b	559527	yes	yes	yes	ENSDARG00000004771
ankrd11	327352	yes	yes	yes	ENSDARG00000051886
ankrd12	393119	yes	yes	yes	ENSDARG00000052419
ankrd13a	556837	yes	yes	yes	ENSDARG00000061901
ankrd13b	568981	yes	yes	yes	ENSDARG00000014652
ankrd13c	325167	yes	yes	yes	ENSDARG00000103831
ankrd13d	562931	yes	yes	yes	ENSDARG00000098140
ankrd16	550225	yes	yes	yes	ENSDARG00000113646
ankrd1a	100151027	yes	yes	yes	ENSDARG00000110628
ankrd1b	564159	yes	yes	yes	ENSDARG00000076192
ankrd2	101886079	yes	yes	no	ENSDARG00000002722
ankrd22	393244	yes	yes	yes	ENSDARG00000002298
ankrd24	565326	yes	yes	yes	ENSDARG00000062103
ankrd27	386887	yes	yes	no	ENSDARG00000089207
ankrd28b	560747	yes	yes	yes	ENSDARG00000009023
ankrd29	553798	yes	yes	yes	ENSDARG00000112325
ankrd31	550610	yes	yes	yes	ENSDARG00000052731
ankrd33aa	557568	yes	yes	yes	ENSDARG00000055638
ankrd33ab	569518	yes	yes	yes	ENSDARG00000002508
ankrd33ba	568270	yes	yes	yes	ENSDARG00000109989
ankrd33bb	557905	yes	yes	yes	ENSDARG00000015589
ankrd34a	798097	yes	yes	yes
ankrd34ba	560938	yes	yes	yes	ENSDARG00000077086
ankrd34bb	565548	yes	yes	yes	ENSDARG00000061641
ankrd34c	566743	yes	yes	yes	ENSDARG00000093286
ankrd37	793783	yes	yes	yes	ENSDARG00000056376
ankrd39	100000333	yes	yes	yes	ENSDARG00000041350
ankrd40	100005118	yes	yes	yes	ENSDARG00000076490
ankrd44	561373	yes	yes	yes	ENSDARG00000026028
ankrd45	553808	yes	yes	yes	ENSDARG00000011326
ankrd46a	100329397	yes	yes	yes	ENSDARG00000044328
ankrd46b	402888	yes	yes	yes	ENSDARG00000015780
ankrd49	550246	yes	yes	yes	ENSDARG00000023508
ankrd52a	553206	yes	yes	yes	ENSDARG00000112185
ankrd52b	564614	yes	yes	yes
ankrd54	436851	yes	yes	yes	ENSDARG00000055743
ankrd55	100006755	yes	yes	yes	ENSDARG00000099182
ankrd63	101885975	yes	yes	yes
ankrd66	101886816	yes	yes	yes	ENSDARG00000111486
ankrd6a	100330565	yes	yes	yes	ENSDARG00000057790
ankrd6b	378477	yes	yes	yes	ENSDARG00000029370
ankrd9	492328	yes	yes	yes	ENSDARG00000028804
anks1ab	100003659	yes	yes	yes	ENSDARG00000078901
anks1b	565408	yes	yes	yes	ENSDARG00000003512
anks3	100136846	yes	yes	yes	ENSDARG00000038557
anks4b	431735	yes	yes	yes	ENSDARG00000036846
anks6	449657	no	no	no
ankzf1	553307	yes	yes	yes	ENSDARG00000041904
anln	562517	yes	yes	yes	ENSDARG00000060917
ano1	407698	yes	yes	yes	ENSDARG00000102335
ano10a	566425	yes	yes	yes	ENSDARG00000057736
ano10b	565195	yes	yes	yes	ENSDARG00000018159
ano11	100007289	yes	yes	yes	ENSDARG00000077327
ano2	566373	yes	yes	yes	ENSDARG00000101363
ano3	553392	yes	yes	yes	ENSDARG00000058015
ano5a	100534737	yes	yes	yes	ENSDARG00000015731
ano5b	560102	yes	yes	yes	ENSDARG00000036147
ano6	100535437	yes	yes	yes	ENSDARG00000061544
ano8a	562947	yes	yes	yes	ENSDARG00000076265
ano8b	562782	yes	yes	yes	ENSDARG00000112701
ano9a	100126106	yes	yes	yes	ENSDARG00000078941
ano9b	559809	yes	yes	yes	ENSDARG00000079324
anos1a	30630	yes	yes	yes	ENSDARG00000012896
anos1b	30652	yes	yes	yes	ENSDARG00000004932
anp32a	335907	yes	yes	yes	ENSDARG00000006487
anp32b	322000	yes	yes	yes	ENSDARG00000023330
anp32e	406562	yes	yes	yes	ENSDARG00000054804
anpepa	558452	yes	yes	yes	ENSDARG00000111591
anpepb	322533	yes	yes	yes	ENSDARG00000103878
antxr1a	793153	yes	yes	yes	ENSDARG00000025672
antxr1b	556289	yes	yes	yes	ENSDARG00000074075
antxr1c	563907	yes	yes	yes	ENSDARG00000063612
antxr1d	563132	yes	yes	yes	ENSDARG00000060845
antxr2a	557239	yes	yes	yes	ENSDARG00000111517
antxr2b	560841	yes	yes	no	ENSDARG00000112595
anxa11a	368215	yes	yes	yes	ENSDARG00000077383
anxa11b	353365	yes	yes	yes	ENSDARG00000002632
anxa13	81880	yes	yes	yes	ENSDARG00000013976
anxa13l	554118	yes	yes	yes	ENSDARG00000013613
anxa1a	334724	yes	yes	yes	ENSDARG00000026726
anxa1b	353358	yes	yes	yes	ENSDARG00000100095
anxa1c	494158	yes	yes	yes	ENSDARG00000104359
anxa2a	325557	yes	yes	yes	ENSDARG00000003216
anxa2b	799806	yes	yes	yes	ENSDARG00000116775
anxa3a	447893	yes	yes	yes	ENSDARG00000112919
anxa3b	492336	yes	yes	yes	ENSDARG00000109335
anxa4	353362	yes	yes	yes	ENSDARG00000036456
anxa5a	557578	yes	yes	yes	ENSDARG00000026406
anxa5b	337132	yes	yes	yes	ENSDARG00000016470
anxa6	353363	yes	yes	yes	ENSDARG00000013335
aoc1	555401	yes	yes	yes	ENSDARG00000061355
aoc2	541429	yes	yes	yes	ENSDARG00000111584
aox5	64265	yes	yes	no	ENSDARG00000071475
aox6	570457	yes	yes	yes	ENSDARG00000020054
ap1ar	100332265	yes	yes	yes	ENSDARG00000031496
ap1b1	562166	yes	yes	yes	ENSDARG00000020621
ap1g1	324466	yes	yes	yes	ENSDARG00000102394
ap1g2	100007877	yes	yes	yes	ENSDARG00000054337
ap1m1	100330411	yes	yes	yes	ENSDARG00000096249
ap1m2	403021	yes	yes	yes	ENSDARG00000096454
ap1m3	445244	yes	yes	yes	ENSDARG00000113914
ap1s1	393279	yes	yes	yes	ENSDARG00000056803
ap1s2	327237	yes	yes	yes	ENSDARG00000114515
ap1s3a	550415	yes	yes	yes	ENSDARG00000110439
ap1s3b	447897	yes	yes	yes	ENSDARG00000027966
ap2a1	558153	yes	yes	yes	ENSDARG00000054320
ap2b1	334632	yes	yes	yes	ENSDARG00000035152
ap2m1a	321051	yes	yes	yes	ENSDARG00000002790
ap2m1b	394001	yes	yes	yes	ENSDARG00000033899
ap2s1	100148085	yes	yes	yes	ENSDARG00000026967
ap3b1	563316	yes	no	yes	ENSDARG00000100082
ap3b2	100000165	yes	no	no	ENSDARG00000105296
ap3d1	563359	yes	yes	yes	ENSDARG00000114974
ap3m1	266798	yes	yes	yes	ENSDARG00000029928
ap3m2	415244	yes	yes	yes	ENSDARG00000016128
ap3s1	449791	yes	no	no
ap3s2	436812	yes	yes	yes	ENSDARG00000039882
ap4b1	393309	yes	yes	yes	ENSDARG00000013726
ap4e1	570467	yes	yes	yes	ENSDARG00000103684
ap4m1	436945	yes	yes	yes	ENSDARG00000056871
ap4s1	368852	yes	yes	yes	ENSDARG00000054220
ap5b1	100148772	yes	yes	yes	ENSDARG00000078805
ap5m1	553681	yes	yes	yes	ENSDARG00000031533
ap5s1	556111	yes	yes	yes	ENSDARG00000076755
ap5z1	100537934	yes	yes	yes	ENSDARG00000078111
apaf1	58131	yes	yes	yes	ENSDARG00000021239
apba1a	100003938	yes	yes	yes	ENSDARG00000103848
apba1b	565507	yes	yes	yes	ENSDARG00000074328
apba2a	100330365	yes	yes	yes	ENSDARG00000063314
apba2b	327160	yes	yes	yes	ENSDARG00000060639
apbb1	565164	yes	yes	yes	ENSDARG00000076560
apbb1ip	393607	yes	yes	yes	ENSDARG00000016505
apbb2b	564990	yes	yes	yes	ENSDARG00000113966
apbb3	101883158	yes	yes	yes	ENSDARG00000053771
apc	386762	yes	yes	yes	ENSDARG00000058868
apc2	565771	yes	yes	no	ENSDARG00000063007
apcdd1l	100001408	yes	yes	yes	ENSDARG00000116773
apeh	100333019	yes	yes	yes	ENSDARG00000008703
apela	100536023	yes	yes	yes	ENSDARG00000113515
apex1	406730	yes	yes	yes	ENSDARG00000045843
apex2	393115	yes	yes	yes	ENSDARG00000008472
aph1b	386808	yes	yes	yes	ENSDARG00000111794
api5	321676	yes	yes	yes	ENSDARG00000033597
apip	447941	yes	yes	yes	ENSDARG00000003132
apitd1	569270	yes	yes	yes	ENSDARG00000111281
apln	798375	yes	yes	yes	ENSDARG00000053279
aplnr2	793710	yes	yes	yes	ENSDARG00000004447
aplnra	561935	yes	yes	yes	ENSDARG00000002172
aplnrb	565492	yes	yes	yes	ENSDARG00000036670
aplp1	404233	yes	yes	yes	ENSDARG00000098368
aplp2	796801	yes	yes	yes	ENSDARG00000054864
apmap	266637	yes	yes	yes	ENSDARG00000017422
apnl	100002992	yes	yes	yes	ENSDARG00000090900
apoa1a	30355	yes	yes	yes	ENSDARG00000110395
apoa1b	100101640	yes	yes	yes	ENSDARG00000101324
apoa1bp	436891	yes	yes	yes	ENSDARG00000058806
apoa2	322327	yes	yes	yes	ENSDARG00000015866
apoa4a	550608	yes	yes	yes	ENSDARG00000101160
apoa4b.1	322543	yes	yes	yes	ENSDARG00000040298
apoa4b.2	570354	yes	yes	yes	ENSDARG00000020866
apoa4b.3	100004607	yes	yes	yes	ENSDARG00000094929
apoba	566465	yes	yes	yes	ENSDARG00000042780
apobb.1	321166	yes	yes	yes	ENSDARG00000022767
apobb.2	100330435	yes	yes	yes	ENSDARG00000075016
apobec2a	503736	yes	yes	yes	ENSDARG00000018881
apobec2b	567047	yes	yes	no	ENSDARG00000113181
apoc1	570638	yes	yes	yes	ENSDARG00000092170
apoc2	568972	yes	yes	yes	ENSDARG00000092155
apoc4	570390	yes	yes	yes	ENSDARG00000075614
apoda.1	767642	yes	yes	yes	ENSDARG00000060345
apoda.2	100148022	yes	yes	yes	ENSDARG00000060350
apodb	567972	yes	yes	yes	ENSDARG00000057437
apoea	553587	yes	yes	yes	ENSDARG00000102004
apoeb	30314	yes	yes	yes	ENSDARG00000040295
apof	793418	yes	yes	yes	ENSDARG00000090980
apol1	560340	yes	yes	yes	ENSDARG00000007425
apom	569714	yes	yes	yes	ENSDARG00000076838
apooa	641319	yes	yes	yes	ENSDARG00000104696
apoob	449837	yes	yes	yes	ENSDARG00000109942
apool	541537	yes	yes	yes	ENSDARG00000111985
apopt1	798687	yes	yes	yes	ENSDARG00000092473
appa	58083	yes	yes	yes	ENSDARG00000104279
appb	170846	yes	yes	yes	ENSDARG00000109552
appbp2	322995	yes	yes	yes	ENSDARG00000007566
appl1	571540	yes	yes	yes	ENSDARG00000060734
appl2	100000135	yes	yes	yes	ENSDARG00000078139
aprt	393641	yes	yes	yes	ENSDARG00000003519
aptx	405797	yes	yes	yes	ENSDARG00000027143
aqp10a	436621	yes	yes	yes	ENSDARG00000112181
aqp10b	100034395	yes	yes	yes	ENSDARG00000058678
aqp11	553476	yes	yes	yes	ENSDARG00000100555
aqp12	436844	yes	yes	yes	ENSDARG00000043279
aqp1a.1	335821	yes	yes	yes	ENSDARG00000023713
aqp1a.2	559284	yes	yes	yes	ENSDARG00000091027
aqp3a	406777	yes	yes	yes	ENSDARG00000003808
aqp3b	568049	yes	yes	no	ENSDARG00000069518
aqp4	445293	yes	yes	yes	ENSDARG00000010565
aqp7	334529	yes	yes	yes	ENSDARG00000026787
aqp8a.1	447923	yes	yes	yes	ENSDARG00000115150
aqp8a.2	563130	yes	yes	yes	ENSDARG00000113224
aqp8b	555598	yes	yes	yes	ENSDARG00000089749
aqp9a	606660	yes	yes	yes
aqp9b	570191	yes	yes	yes	ENSDARG00000053480
aqr	393436	yes	yes	yes	ENSDARG00000016775
ar	100005148	yes	yes	yes	ENSDARG00000114287
araf	403063	yes	yes	yes	ENSDARG00000054533
arap1	101883993	yes	yes	no
arap3	558931	yes	yes	yes	ENSDARG00000076801
arcn1a	266982	yes	yes	yes	ENSDARG00000002792
arcn1b	399661	yes	yes	yes	ENSDARG00000031214
areg	101884611	yes	yes	yes	ENSDARG00000076853
arel1	100332031	yes	yes	yes	ENSDARG00000100359
arf1	114428	yes	yes	yes	ENSDARG00000009484
arf2a	399477	yes	yes	yes	ENSDARG00000014763
arf2b	327026	yes	yes	yes	ENSDARG00000016393
arf3a	445047	yes	yes	yes	ENSDARG00000070539
arf3b	368822	yes	yes	yes	ENSDARG00000112366
arf4a	445196	yes	yes	yes	ENSDARG00000045989
arf4b	550402	yes	yes	yes	ENSDARG00000100339
arf5	378724	yes	yes	yes	ENSDARG00000115687
arf6a	336063	yes	yes	yes	ENSDARG00000101626
arf6b	100003206	yes	yes	yes	ENSDARG00000052928
arfgap1	100149572	yes	yes	yes	ENSDARG00000101616
arfgap2	641490	yes	yes	yes	ENSDARG00000067601
arfgap3	402889	yes	yes	yes	ENSDARG00000097583
arfgef1	100329953	yes	yes	yes	ENSDARG00000063474
arfgef2	100334572	yes	yes	yes	ENSDARG00000074702
arfgef3	562652	yes	yes	yes	ENSDARG00000077656
arfip1	100003895	yes	yes	yes	ENSDARG00000116473
arfip2a	449664	yes	yes	yes	ENSDARG00000059244
arfip2b	550342	yes	yes	yes	ENSDARG00000109805
arfrp1	503602	yes	yes	yes	ENSDARG00000057857
arg1	570368	yes	yes	no	ENSDARG00000110741
arg2	322614	yes	yes	yes	ENSDARG00000039269
arglu1a	406834	yes	yes	yes	ENSDARG00000019223
arglu1b	393131	yes	yes	yes	ENSDARG00000018319
arhgap1	550478	yes	yes	yes	ENSDARG00000024324
arhgap10	692277	yes	yes	yes	ENSDARG00000078326
arhgap11a	406608	yes	yes	yes	ENSDARG00000100019
arhgap12a	563267	yes	yes	yes	ENSDARG00000008548
arhgap12b	393848	yes	yes	yes	ENSDARG00000109973
arhgap15	100003547	yes	yes	yes	ENSDARG00000062349
arhgap17a	550254	yes	yes	yes	ENSDARG00000113457
arhgap17b	100141341	yes	yes	yes	ENSDARG00000062263
arhgap18	100004252	yes	yes	no	ENSDARG00000074740
arhgap19	100537002	yes	yes	yes	ENSDARG00000083189
arhgap20	796434	yes	yes	yes	ENSDARG00000089326
arhgap20b	100002649	yes	yes	yes
arhgap21b	326745	yes	yes	yes	ENSDARG00000075673
arhgap22	562503	yes	yes	yes	ENSDARG00000021255
arhgap23a	100006233	yes	yes	yes	ENSDARG00000052950
arhgap23b	562244	yes	yes	yes	ENSDARG00000026840
arhgap24	100005116	yes	yes	yes	ENSDARG00000100973
arhgap25	562468	yes	yes	yes	ENSDARG00000061784
arhgap27	564211	yes	yes	yes	ENSDARG00000104255
arhgap27l	566523	yes	yes	yes	ENSDARG00000061798
arhgap28	492794	yes	yes	yes
arhgap29a	564805	yes	yes	yes	ENSDARG00000026329
arhgap29b	378998	yes	yes	yes	ENSDARG00000017748
arhgap31	101885883	yes	yes	yes	ENSDARG00000059472
arhgap32a	562449	yes	yes	yes	ENSDARG00000075334
arhgap32b	569434	yes	yes	yes	ENSDARG00000074184
arhgap33	569720	yes	yes	yes	ENSDARG00000011333
arhgap35	564565	yes	yes	yes	ENSDARG00000113130
arhgap39	101884459	yes	yes	yes	ENSDARG00000100007
arhgap42a	566275	yes	yes	yes	ENSDARG00000116136
arhgap44	100333556	yes	yes	yes	ENSDARG00000104549
arhgap4a	393416	yes	yes	yes	ENSDARG00000039265
arhgap4b	561231	yes	yes	yes	ENSDARG00000015003
arhgap5	795752	yes	yes	yes	ENSDARG00000061294
arhgap6	101882360	yes	yes	yes
arhgap6	559813	yes	yes	yes	ENSDARG00000059672
arhgap9	100334461	yes	yes	yes
arhgdia	406770	yes	yes	yes	ENSDARG00000043795
arhgdig	394132	yes	yes	yes	ENSDARG00000004034
arhgef10	334278	yes	yes	yes	ENSDARG00000115629
arhgef10la	799435	yes	yes	yes	ENSDARG00000088630
arhgef10lb	567649	yes	yes	yes	ENSDARG00000074244
arhgef11	565268	yes	yes	no
arhgef12a	562455	yes	yes	yes	ENSDARG00000030532
arhgef12b	571031	yes	yes	yes	ENSDARG00000100913
arhgef15	101882903	yes	yes	yes	ENSDARG00000100293
arhgef16	567180	yes	yes	yes	ENSDARG00000077114
arhgef18a	407987	yes	yes	yes	ENSDARG00000011157
arhgef18b	562264	yes	yes	yes	ENSDARG00000042308
arhgef19	569202	yes	yes	yes	ENSDARG00000078853
arhgef1a	368266	yes	yes	yes	ENSDARG00000040380
arhgef1b	557983	yes	yes	yes	ENSDARG00000055837
arhgef2	561276	yes	yes	yes	ENSDARG00000116451
arhgef25a	100331456	yes	yes	yes	ENSDARG00000100606
arhgef25b	569561	yes	yes	yes	ENSDARG00000114202
arhgef28	559941	yes	yes	yes	ENSDARG00000112290
arhgef3	570228	yes	yes	yes	ENSDARG00000013834
arhgef33	559216	yes	yes	yes	ENSDARG00000097964
arhgef37	101883655	yes	yes	yes	ENSDARG00000115787
arhgef38	100317614	yes	yes	yes	ENSDARG00000079377
arhgef39	492469	yes	yes	yes	ENSDARG00000114412
arhgef3l	553761	yes	yes	yes	ENSDARG00000037554
arhgef4	559017	yes	yes	yes	ENSDARG00000012914
arhgef40	100151026	yes	yes	yes	ENSDARG00000078979
arhgef5	100537160	yes	yes	yes
arhgef6	558288	yes	yes	yes	ENSDARG00000006683
arhgef7a	553493	yes	yes	yes	ENSDARG00000114088
arhgef7b	494081	yes	yes	yes	ENSDARG00000073848
arhgef9a	559868	yes	yes	yes	ENSDARG00000061746
arhgef9b	560923	yes	yes	yes	ENSDARG00000110276
arid1aa	100141358	yes	yes	yes	ENSDARG00000101710
arid1ab	568161	yes	yes	yes	ENSDARG00000101891
arid1b	569589	yes	yes	yes	ENSDARG00000092503
arid2	566352	yes	yes	yes	ENSDARG00000007413
arid3a	562799	yes	yes	yes	ENSDARG00000070843
arid3b	571249	yes	yes	yes	ENSDARG00000104034
arid3c	569444	yes	yes	yes	ENSDARG00000114447
arid4a	327404	yes	yes	yes	ENSDARG00000043873
arid4b	100537923	yes	yes	yes	ENSDARG00000090656
arid5a	100462698	yes	yes	yes	ENSDARG00000077120
arid5b	100536827	yes	yes	yes	ENSDARG00000037196
arid6	572528	yes	yes	yes	ENSDARG00000069988
arih1	327005	yes	yes	yes	ENSDARG00000109413
arih1l	405859	yes	yes	yes	ENSDARG00000112965
arih2	406417	yes	yes	yes	ENSDARG00000012848
arl1	436746	yes	yes	yes	ENSDARG00000101680
arl10	560654	yes	yes	yes	ENSDARG00000117130
arl11	324689	yes	yes	yes	ENSDARG00000036637
arl13a	793658	yes	yes	yes	ENSDARG00000052575
arl13b	286784	yes	yes	yes	ENSDARG00000012763
arl14	556921	yes	yes	yes	ENSDARG00000063223
arl14ep	751672	yes	yes	yes	ENSDARG00000001210
arl15a	567657	yes	yes	yes	ENSDARG00000114295
arl15b	560030	yes	yes	yes	ENSDARG00000109775
arl16	100037345	yes	yes	yes	ENSDARG00000110386
arl2	449774	yes	yes	yes	ENSDARG00000112191
arl2bp	393976	yes	yes	yes	ENSDARG00000114401
arl3	797451	yes	yes	yes	ENSDARG00000113228
arl3l1	393666	yes	yes	yes	ENSDARG00000111106
arl3l2	393692	yes	yes	yes	ENSDARG00000015404
arl4aa	393834	yes	yes	yes	ENSDARG00000099918
arl4ab	338267	yes	yes	yes	ENSDARG00000110649
arl4ca	550444	yes	yes	yes	ENSDARG00000057606
arl4cb	406531	yes	yes	yes	ENSDARG00000110274
arl4d	323573	yes	yes	yes	ENSDARG00000114046
arl5a	436611	yes	yes	yes	ENSDARG00000117003
arl5c	393819	yes	yes	yes	ENSDARG00000035719
arl6	494134	yes	yes	yes	ENSDARG00000113281
arl6ip1	394087	yes	yes	yes	ENSDARG00000112340
arl6ip4	553796	yes	yes	yes	ENSDARG00000116805
arl6ip5a	450076	yes	yes	yes	ENSDARG00000114089
arl6ip5b	436790	yes	yes	yes	ENSDARG00000016238
arl6ip6	100037347	yes	yes	yes	ENSDARG00000071013
arl8	327551	yes	yes	yes	ENSDARG00000094709
arl8a	567222	yes	yes	yes	ENSDARG00000078686
arl8ba	337424	yes	yes	yes	ENSDARG00000006915
arl8bb	562445	yes	yes	yes	ENSDARG00000070318
arl9	751670	yes	yes	yes	ENSDARG00000071881
armc1	494066	yes	yes	yes	ENSDARG00000013861
armc10	557740	yes	yes	yes	ENSDARG00000062960
armc1l	321240	yes	yes	yes	ENSDARG00000020887
armc2	555846	yes	yes	yes	ENSDARG00000022660
armc3	560136	yes	yes	yes	ENSDARG00000074708
armc4	799229	yes	yes	yes	ENSDARG00000111868
armc5	569910	yes	yes	yes	ENSDARG00000078083
armc6	555425	yes	yes	yes	ENSDARG00000103770
armc7	767659	yes	yes	yes	ENSDARG00000061197
armc8	571528	yes	yes	yes	ENSDARG00000110157
armc9	100334308	yes	no	yes	ENSDARG00000087299
armt1	541518	yes	yes	yes	ENSDARG00000112391
arnt	493634	yes	yes	yes	ENSDARG00000115999
arnt2	64277	yes	yes	yes	ENSDARG00000103697
arntl1a	58098	yes	yes	yes	ENSDARG00000006791
arntl1b	352935	yes	yes	yes	ENSDARG00000114562
arntl2	58099	yes	yes	yes	ENSDARG00000116327
arpc1a	394243	yes	yes	yes	ENSDARG00000008383
arpc1b	335474	yes	yes	yes	ENSDARG00000027063
arpc2	327068	yes	yes	yes	ENSDARG00000075989
arpc3	415204	yes	yes	yes	ENSDARG00000057882
arpc4	114456	yes	yes	yes	ENSDARG00000054063
arpc4l	445305	yes	yes	yes	ENSDARG00000058225
arpc5a	336504	yes	yes	yes	ENSDARG00000039142
arpc5b	399482	yes	yes	yes	ENSDARG00000019062
arpc5la	393550	yes	yes	yes	ENSDARG00000041720
arpc5lb	556104	yes	yes	yes	ENSDARG00000035433
arpin	550477	yes	yes	yes	ENSDARG00000115959
arpp19a	393603	yes	yes	yes	ENSDARG00000109679
arpp19b	393947	yes	yes	yes	ENSDARG00000039880
arpp21	564134	yes	yes	yes	ENSDARG00000061081
arr3a	436678	yes	yes	yes	ENSDARG00000114648
arr3b	796867	yes	yes	yes	ENSDARG00000098475
arrb1	553266	yes	yes	no	ENSDARG00000043241
arrb2a	321378	yes	yes	yes	ENSDARG00000039215
arrb2b	394099	yes	yes	yes	ENSDARG00000011545
arrdc1a	100006005	yes	yes	yes	ENSDARG00000068148
arrdc1b	570029	yes	yes	yes	ENSDARG00000109340
arrdc2	335206	yes	yes	yes	ENSDARG00000020761
arrdc3a	566685	yes	yes	yes	ENSDARG00000052690
arrdc3b	447866	yes	yes	yes	ENSDARG00000036028
arsa	541416	yes	yes	yes	ENSDARG00000042270
arsb	100538007	yes	no	no	ENSDARG00000108788
arsg	564790	yes	yes	yes	ENSDARG00000101715
arsh	100332997	yes	yes	yes	ENSDARG00000002299
arsia	100329483	yes	yes	yes	ENSDARG00000077606
arsk	562412	yes	yes	yes	ENSDARG00000115105
art4	555597	yes	yes	yes	ENSDARG00000078178
artn	101882107	yes	yes	yes
arv1	568203	yes	yes	yes	ENSDARG00000074757
arvcfa	572216	yes	yes	yes	ENSDARG00000074329
arvcfb	564669	yes	yes	yes	ENSDARG00000061688
arxa	30657	yes	yes	yes	ENSDARG00000058011
arxb	100329907	yes	yes	yes	ENSDARG00000101523
as3mt	664699	yes	yes	yes	ENSDARG00000027572
asah1a	450068	yes	yes	yes	ENSDARG00000112187
asah1b	393549	yes	yes	yes	ENSDARG00000116060
asah2	493602	yes	yes	yes	ENSDARG00000012829
asap1a	100170829	yes	yes	yes	ENSDARG00000029463
asap1b	565859	yes	yes	yes	ENSDARG00000039729
asap2a	570669	yes	yes	yes	ENSDARG00000010181
asap2b	560581	yes	yes	yes	ENSDARG00000019564
asap3	664764	yes	yes	yes	ENSDARG00000021896
asb1	554673	yes	yes	yes	ENSDARG00000026635
asb10	559467	yes	yes	yes	ENSDARG00000099461
asb11	791758	yes	yes	yes	ENSDARG00000056561
asb12a	322927	yes	yes	yes	ENSDARG00000110715
asb12b	445507	yes	yes	yes	ENSDARG00000116721
asb13a.1	436801	yes	yes	yes	ENSDARG00000109650
asb13a.2	563551	yes	yes	yes	ENSDARG00000109879
asb13b	556808	yes	yes	yes	ENSDARG00000089833
asb14a	568371	yes	yes	yes	ENSDARG00000008473
asb14b	100535284	yes	yes	yes	ENSDARG00000112104
asb15a	100151067	yes	yes	yes	ENSDARG00000115823
asb15b	568579	yes	yes	no	ENSDARG00000045863
asb16	678621	yes	yes	yes	ENSDARG00000110292
asb18	792746	yes	yes	yes	ENSDARG00000012948
asb2a.1	567986	yes	yes	yes	ENSDARG00000003797
asb2a.2	100536271	yes	yes	yes	ENSDARG00000096748
asb2b	402848	yes	yes	yes	ENSDARG00000102490
asb3	334210	yes	yes	yes	ENSDARG00000005246
asb4	550321	yes	yes	yes	ENSDARG00000034988
asb5a	550441	yes	yes	yes	ENSDARG00000114709
asb5b	550449	yes	yes	yes	ENSDARG00000053222
asb6	553600	yes	yes	yes	ENSDARG00000007125
asb7	405798	yes	yes	yes	ENSDARG00000006494
asb8	327200	yes	yes	yes	ENSDARG00000003383
ascc1	550273	yes	yes	yes	ENSDARG00000077760
ascc2	393414	yes	yes	yes	ENSDARG00000013058
ascc3	100332599	yes	no	no	ENSDARG00000086678
ascl1a	30466	yes	yes	yes	ENSDARG00000038386
ascl1b	30478	yes	yes	yes	ENSDARG00000101628
asf1ba	386897	yes	yes	yes	ENSDARG00000101037
asf1bb	792029	yes	yes	yes	ENSDARG00000043713
ash1l	563799	yes	yes	yes	ENSDARG00000070981
ash2l	558193	yes	yes	yes	ENSDARG00000060392
asic1a	791696	yes	yes	yes	ENSDARG00000008329
asic1b	407672	yes	yes	yes	ENSDARG00000101866
asic1c	407670	yes	yes	yes	ENSDARG00000098428
asic2	407669	yes	yes	yes	ENSDARG00000006849
asic4a	407668	yes	yes	yes	ENSDARG00000025162
asic4b	407667	yes	yes	yes	ENSDARG00000004243
asip1	798574	yes	yes	yes	ENSDARG00000077858
asip2b	796595	yes	yes	yes	ENSDARG00000114760
asl	393423	yes	yes	yes	ENSDARG00000033361
asmt	100141344	yes	yes	yes	ENSDARG00000098249
asmt2	568256	yes	yes	yes	ENSDARG00000109921
asmtl	324134	yes	yes	yes	ENSDARG00000114151
asna1	325704	yes	yes	yes	ENSDARG00000018190
asns	394138	yes	yes	yes	ENSDARG00000016375
asnsd1	368827	yes	yes	yes	ENSDARG00000000540
aspa	557232	yes	yes	yes	ENSDARG00000005154
aspdh	447919	yes	yes	yes	ENSDARG00000038297
aspg	100124594	yes	yes	yes	ENSDARG00000052942
asph	323659	yes	yes	yes	ENSDARG00000055945
asphd1	557921	yes	yes	yes	ENSDARG00000075813
asphd2	569819	yes	yes	yes	ENSDARG00000059629
aspm	554173	yes	yes	yes	ENSDARG00000103754
aspn	65228	yes	yes	yes	ENSDARG00000002192
aspscr1	550237	yes	yes	yes	ENSDARG00000105321
asrgl1	541402	yes	yes	yes	ENSDARG00000021681
ass1	447864	yes	yes	yes
aste1	100006826	yes	yes	yes	ENSDARG00000070132
aste1b	100003699	yes	yes	yes	ENSDARG00000062530
astn1	791157	yes	yes	yes	ENSDARG00000068323
astn2	100535087	yes	yes	no	ENSDARG00000105924
asun	334292	yes	yes	yes	ENSDARG00000011764
asxl1	403066	yes	yes	yes	ENSDARG00000115751
asxl2	100150267	yes	yes	yes	ENSDARG00000076501
asz1	572911	yes	yes	yes	ENSDARG00000116151
atad1a	368672	yes	yes	yes	ENSDARG00000023267
atad1b	368412	yes	yes	yes	ENSDARG00000056609
atad2b	100331225	yes	yes	yes	ENSDARG00000060537
atad3	403004	yes	yes	yes	ENSDARG00000086848
atad5a	560591	yes	yes	yes	ENSDARG00000070568
atad5b	321619	yes	yes	yes	ENSDARG00000116936
atat1	406389	yes	yes	yes	ENSDARG00000004472
atcaya	565827	yes	yes	yes	ENSDARG00000071678
atcayb	100329872	yes	yes	yes	ENSDARG00000059781
ate1	101886126	yes	yes	yes	ENSDARG00000103813
atf1	325609	yes	yes	yes	ENSDARG00000109865
atf2	100006516	yes	yes	yes	ENSDARG00000023903
atf3	393939	yes	yes	yes	ENSDARG00000007823
atf4a	406514	yes	yes	yes	ENSDARG00000111939
atf4b	556410	yes	yes	yes	ENSDARG00000114163
atf5a	566223	yes	yes	yes	ENSDARG00000068096
atf5b	567253	yes	yes	yes	ENSDARG00000077785
atf6	558071	yes	yes	no	ENSDARG00000012656
atf6b	777612	yes	yes	yes
atf7a	566279	yes	yes	yes	ENSDARG00000011298
atf7b	567018	yes	yes	yes	ENSDARG00000115171
atf7ip	558977	yes	yes	yes	ENSDARG00000069619
atf7ip2	100005485	yes	yes	yes	ENSDARG00000089698
atg10	641330	yes	yes	yes	ENSDARG00000104846
atg101	567680	yes	yes	yes	ENSDARG00000043287
atg12	570965	yes	yes	no	ENSDARG00000113990
atg13	393405	yes	yes	yes	ENSDARG00000036040
atg16l1	550552	yes	no	no	ENSDARG00000099430
atg16l2	100034627	yes	yes	yes	ENSDARG00000043238
atg2b	100000277	yes	yes	no	ENSDARG00000097650
atg3	336632	yes	yes	yes	ENSDARG00000009350
atg4a	554140	yes	yes	yes	ENSDARG00000014531
atg4b	448859	yes	yes	yes	ENSDARG00000052104
atg4c	415193	yes	yes	yes	ENSDARG00000044373
atg4da	795933	yes	yes	yes	ENSDARG00000043548
atg4db	100329304	yes	yes	no	ENSDARG00000088145
atg5	494180	yes	yes	yes	ENSDARG00000023396
atg7	100333016	yes	no	yes	ENSDARG00000102893
atg9a	100009663	yes	yes	yes	ENSDARG00000044551
atg9b	791223	yes	yes	yes	ENSDARG00000055292
atic	140622	yes	yes	yes	ENSDARG00000016706
atl1	571909	yes	yes	yes	ENSDARG00000060481
atl2	323665	yes	yes	yes	ENSDARG00000113487
atl3	449995	yes	yes	yes	ENSDARG00000004270
atm	403064	yes	yes	yes	ENSDARG00000002385
atmin	571606	yes	yes	yes	ENSDARG00000068601
atn1	321707	yes	yes	yes	ENSDARG00000092067
atoh1a	30303	yes	yes	yes	ENSDARG00000055294
atoh1b	493915	yes	yes	yes	ENSDARG00000099564
atoh1c	100498672	yes	yes	yes	ENSDARG00000039602
atoh7	58216	yes	yes	yes	ENSDARG00000069552
atoh8	561606	yes	yes	yes	ENSDARG00000110248
atox1	558347	yes	yes	yes	ENSDARG00000087693
atp10a	567172	yes	yes	yes	ENSDARG00000110280
atp10b	563932	yes	yes	yes	ENSDARG00000076230
atp10d	571658	yes	yes	yes	ENSDARG00000078887
atp11a	562925	yes	yes	yes	ENSDARG00000115219
atp11c	368385	yes	yes	yes	ENSDARG00000116165
atp13a1	334466	yes	yes	yes	ENSDARG00000029931
atp13a2	568666	yes	yes	yes	ENSDARG00000117108
atp13a3	572029	yes	no	yes	ENSDARG00000076622
atp1a1a.1	64612	yes	yes	yes	ENSDARG00000002791
atp1a1a.2	64613	yes	yes	yes	ENSDARG00000007739
atp1a1a.3	64614	yes	yes	yes	ENSDARG00000039131
atp1a1a.4	64615	yes	yes	yes	ENSDARG00000001870
atp1a1a.5	245703	yes	yes	yes	ENSDARG00000040252
atp1a1b	64616	yes	yes	yes	ENSDARG00000115121
atp1a2a	64609	yes	yes	yes	ENSDARG00000111818
atp1a3a	64610	yes	yes	yes	ENSDARG00000018259
atp1a3b	64611	yes	yes	yes	ENSDARG00000104139
atp1b1a	64267	yes	yes	yes	ENSDARG00000013144
atp1b1b	64273	yes	yes	yes	ENSDARG00000076833
atp1b2a	64269	yes	yes	yes	ENSDARG00000099203
atp1b2b	114457	yes	yes	yes	ENSDARG00000113354
atp1b3a	30468	yes	yes	yes	ENSDARG00000015790
atp1b3b	64272	yes	yes	yes	ENSDARG00000042837
atp1b4	100037383	yes	yes	yes	ENSDARG00000053262
atp2a1	260440	yes	no	no	ENSDARG00000020574
atp2a1l	494489	yes	yes	yes	ENSDARG00000035458
atp2a2a	393940	yes	yes	yes	ENSDARG00000029439
atp2a2b	568265	yes	yes	yes	ENSDARG00000005122
atp2a3	568671	yes	yes	yes	ENSDARG00000060978
atp2b1a	378746	yes	yes	yes	ENSDARG00000012684
atp2b1b	561190	yes	yes	yes	ENSDARG00000007788
atp2b2	557430	yes	yes	yes	ENSDARG00000063433
atp2b3a	436745	yes	yes	yes	ENSDARG00000043474
atp2b3b	558525	yes	yes	yes	ENSDARG00000112865
atp2b4	768304	yes	yes	yes	ENSDARG00000044902
atp2c1	559574	yes	yes	yes	ENSDARG00000060197
atp5a1	553755	yes	yes	yes	ENSDARG00000010149
atp5b	554135	yes	yes	yes	ENSDARG00000070083
atp5c1	336957	yes	yes	yes	ENSDARG00000045514
atp5d	335709	yes	yes	yes	ENSDARG00000019404
atp5e	798291	yes	yes	yes	ENSDARG00000095897
atp5f1	449787	yes	yes	yes	ENSDARG00000011553
atp5g1	406301	yes	yes	yes	ENSDARG00000056008
atp5g3a	394151	yes	yes	yes	ENSDARG00000017775
atp5g3b	81541	yes	yes	yes	ENSDARG00000009447
atp5h	393675	yes	yes	yes	ENSDARG00000098355
atp5ia	559659	yes	yes	yes	ENSDARG00000078113
atp5ib	767750	yes	yes	yes	ENSDARG00000117205
atp5j	406599	yes	yes	yes	ENSDARG00000014313
atp5j2	402883	yes	yes	yes	ENSDARG00000037867
atp5l	326977	yes	yes	yes	ENSDARG00000011841
atp5o	335191	yes	yes	yes	ENSDARG00000001788
atp5s	393187	yes	yes	yes	ENSDARG00000012072
ATP6	140519	yes	yes	no	ENSDARG00000063911
atp6ap1a	100004566	yes	yes	yes	ENSDARG00000041417
atp6ap1b	195824	yes	yes	yes	ENSDARG00000037153
atp6ap1la	100000415	yes	yes	yes	ENSDARG00000091509
atp6ap1lb	561786	yes	yes	yes	ENSDARG00000090963
atp6ap2	406296	yes	yes	yes	ENSDARG00000008735
atp6v0a1a	324307	yes	yes	yes	ENSDARG00000020847
atp6v0a1b	553691	yes	yes	yes	ENSDARG00000015174
atp6v0a2a	561469	yes	yes	yes	ENSDARG00000035538
atp6v0a2b	561117	yes	yes	yes	ENSDARG00000113695
atp6v0b	321724	yes	yes	yes	ENSDARG00000031681
atp6v0ca	192336	yes	yes	yes	ENSDARG00000057853
atp6v0cb	325402	yes	yes	yes	ENSDARG00000036577
atp6v0d1	322811	yes	yes	yes	ENSDARG00000115876
atp6v0e1	450017	yes	yes	yes	ENSDARG00000101794
atp6v1aa	394110	yes	yes	yes	ENSDARG00000113437
atp6v1ab	337583	yes	yes	yes	ENSDARG00000112815
atp6v1b2	359840	yes	yes	yes	ENSDARG00000043465
atp6v1ba	359839	yes	yes	yes	ENSDARG00000111525
atp6v1c1a	368907	yes	yes	yes	ENSDARG00000023967
atp6v1c1b	449655	yes	yes	yes	ENSDARG00000112507
atp6v1c2	100538220	yes	yes	yes	ENSDARG00000070440
atp6v1d	393935	yes	yes	yes	ENSDARG00000011175
atp6v1e1b	192335	yes	yes	yes	ENSDARG00000030694
atp6v1f	436799	yes	yes	yes	ENSDARG00000045543
atp6v1g1	335025	yes	yes	yes	ENSDARG00000110951
atp6v1h	286779	yes	yes	yes	ENSDARG00000006370
atp7a	564924	yes	yes	yes	ENSDARG00000003699
atp7b	556499	yes	yes	yes	ENSDARG00000058145
ATP8	140520	yes	yes	no	ENSDARG00000063910
atp8a1	767630	yes	yes	yes	ENSDARG00000063001
atp8a2	100330943	yes	yes	yes	ENSDARG00000110095
atp8b1	100148342	yes	yes	yes	ENSDARG00000060980
atp8b2	323754	yes	yes	yes	ENSDARG00000115821
atp8b3	566530	yes	yes	yes	ENSDARG00000042285
atp8b4	559291	yes	yes	yes	ENSDARG00000079453
atp8b5a	100330945	yes	yes	yes	ENSDARG00000062040
atp8b5b	563450	yes	yes	yes	ENSDARG00000104450
atp9a	101886226	yes	yes	yes	ENSDARG00000115869
atp9b	568160	yes	yes	yes	ENSDARG00000062521
atpaf1	550606	yes	yes	yes	ENSDARG00000042799
atpaf2	560253	yes	yes	yes	ENSDARG00000115757
atpif1a	100037369	yes	yes	yes	ENSDARG00000067975
atpif1b	558368	yes	yes	yes	ENSDARG00000112469
atpv0e2	553767	yes	yes	yes	ENSDARG00000059057
atr	567770	yes	yes	yes	ENSDARG00000079625
atraid	553468	yes	yes	yes	ENSDARG00000043388
atrip	558534	yes	yes	yes	ENSDARG00000063076
atrn	794975	yes	no	no	ENSDARG00000110632
atrnl1a	792417	yes	yes	yes	ENSDARG00000077188
atrnl1b	569196	yes	yes	yes	ENSDARG00000006420
atrx	323299	yes	yes	yes	ENSDARG00000112921
atxn10	100034473	yes	yes	yes	ENSDARG00000008439
atxn1a	557340	yes	yes	yes	ENSDARG00000115198
atxn1b	565841	yes	yes	yes	ENSDARG00000060862
atxn1l	793927	yes	yes	yes	ENSDARG00000086977
atxn2	569210	yes	yes	yes	ENSDARG00000115860
atxn2l	324525	yes	yes	yes	ENSDARG00000112336
atxn3	394079	yes	yes	yes	ENSDARG00000099274
atxn7	100001490	yes	yes	yes	ENSDARG00000074804
atxn7l1	100536590	yes	yes	yes	ENSDARG00000089860
atxn7l2a	692316	yes	yes	yes	ENSDARG00000116622
atxn7l2b	436928	yes	yes	yes	ENSDARG00000056268
atxn7l3	368510	yes	yes	yes	ENSDARG00000029331
auh	445182	yes	yes	yes	ENSDARG00000042975
aunip	103909277	yes	yes	yes
aup1	324654	yes	yes	yes	ENSDARG00000092609
aurka	445246	yes	yes	yes	ENSDARG00000012485
aurkaip1	100126015	yes	yes	yes	ENSDARG00000074985
aurkb	791894	yes	yes	yes	ENSDARG00000037640
auts2a	368890	yes	yes	yes	ENSDARG00000116439
auts2b	100150849	yes	yes	yes	ENSDARG00000020946
avd	567678	yes	yes	yes	ENSDARG00000087961
aven	692323	yes	yes	yes	ENSDARG00000002894
avil	678618	yes	yes	yes	ENSDARG00000059342
avl9	751682	yes	yes	yes	ENSDARG00000055538
avp	352922	yes	yes	yes	ENSDARG00000058567
avpr1aa	571591	yes	yes	yes	ENSDARG00000077083
avpr1ab	555939	yes	yes	yes	ENSDARG00000045788
avpr2aa	100007585	yes	yes	yes	ENSDARG00000007436
avpr2ab	100151502	yes	yes	yes	ENSDARG00000029219
avpr2l	100004053	yes	yes	yes	ENSDARG00000076690
axdnd1	557839	yes	yes	yes	ENSDARG00000062355
axin1	57931	yes	yes	yes	ENSDARG00000102964
axin2	58080	yes	yes	yes	ENSDARG00000100149
axl	100330721	yes	no	yes	ENSDARG00000112045
azi2	406377	yes	yes	yes	ENSDARG00000102419
azin1a	550230	yes	yes	yes	ENSDARG00000052789
azin1b	317764	yes	yes	yes	ENSDARG00000115647
b2m	30400	yes	yes	yes	ENSDARG00000053136
b2ml	791742	yes	yes	yes	ENSDARG00000015887
b3galnt2	553716	yes	yes	yes	ENSDARG00000046133
b3galt1a	559521	yes	yes	yes	ENSDARG00000079700
b3galt1b	571003	yes	yes	yes
b3galt2	404633	yes	yes	yes	ENSDARG00000114032
b3galt4	101886595	yes	yes	yes	ENSDARG00000076218
b3galt6	572324	yes	yes	yes	ENSDARG00000038414
b3gat1a	548607	yes	yes	yes	ENSDARG00000112270
b3gat1b	100332644	yes	yes	yes	ENSDARG00000113928
b3gat2	445060	yes	yes	yes	ENSDARG00000030733
b3gat3	192334	yes	yes	yes	ENSDARG00000001939
b3glcta	799443	yes	yes	yes	ENSDARG00000073917
b3glctb	564156	yes	yes	yes	ENSDARG00000110421
b3gnt2a	405766	yes	yes	yes	ENSDARG00000052376
b3gnt2b	793362	yes	yes	yes	ENSDARG00000091902
b3gnt2l	797513	yes	yes	yes	ENSDARG00000068219
b3gnt3	561172	yes	yes	yes	ENSDARG00000058100
b3gnt5a	336526	yes	yes	yes	ENSDARG00000018971
b3gnt5b	791470	yes	yes	yes	ENSDARG00000004396
b3gnt7	286748	yes	yes	yes	ENSDARG00000038489
b3gnt7l	407623	yes	yes	yes	ENSDARG00000053133
b3gnt9	100034499	yes	yes	yes	ENSDARG00000041616
b3gntl1	619261	yes	yes	yes	ENSDARG00000043431
b4galnt1a	558684	yes	yes	yes	ENSDARG00000117038
b4galnt1b	793635	yes	yes	yes	ENSDARG00000114582
b4galnt2.1	558078	yes	yes	yes	ENSDARG00000094579
b4galnt2.2	557782	yes	yes	yes	ENSDARG00000070605
b4galnt3a	561505	yes	yes	yes	ENSDARG00000078749
b4galnt3b	553524	yes	yes	yes	ENSDARG00000058939
b4galnt4a	565184	yes	yes	yes	ENSDARG00000112006
b4galnt4b	559305	yes	yes	yes	ENSDARG00000076701
b4galt1	550425	yes	yes	yes
b4galt1l	768123	yes	yes	yes	ENSDARG00000104404
b4galt2	100148828	yes	yes	yes	ENSDARG00000077994
b4galt3	561756	yes	yes	yes	ENSDARG00000112697
b4galt4	492760	yes	yes	yes	ENSDARG00000104042
b4galt5	724080	yes	yes	yes	ENSDARG00000037815
b4galt6	393912	yes	yes	yes	ENSDARG00000010301
b4galt7	445022	yes	yes	yes	ENSDARG00000021899
b4gat1	101669768	yes	yes	yes	ENSDARG00000111962
b9d1	554150	yes	yes	yes	ENSDARG00000011727
b9d2	436667	yes	yes	yes	ENSDARG00000017385
ba1	30216	yes	yes	yes	ENSDARG00000089087
ba1l	504174	yes	yes	yes	ENSDARG00000097238
baalc	101884762	yes	yes	yes
babam1	445296	yes	yes	yes	ENSDARG00000077526
babam2	550474	yes	yes	yes	ENSDARG00000038863
bace1	403005	yes	yes	yes	ENSDARG00000101716
bace2	449818	yes	yes	yes	ENSDARG00000044781
bach1a	678555	yes	yes	yes	ENSDARG00000062553
bach1b	553688	yes	yes	yes	ENSDARG00000002196
bach2a	557210	yes	yes	yes	ENSDARG00000036569
bach2b	555350	yes	yes	yes	ENSDARG00000004074
bada	564921	yes	yes	yes	ENSDARG00000087993
badb	58100	yes	yes	yes	ENSDARG00000114609
bag1	558108	yes	yes	yes	ENSDARG00000020895
bag2	393975	yes	yes	yes	ENSDARG00000035005
bag3	445139	yes	yes	yes	ENSDARG00000039486
bag4	100001980	yes	yes	yes	ENSDARG00000043179
bag5	569580	yes	yes	yes	ENSDARG00000017316
bag6	83910	yes	yes	yes	ENSDARG00000075892
bag6l	751663	yes	yes	yes	ENSDARG00000077531
bahcc1b	794333	yes	yes	yes	ENSDARG00000080009
bahd1	564712	yes	yes	yes	ENSDARG00000112121
baiap2a	678518	yes	yes	yes	ENSDARG00000062799
baiap2b	100537012	yes	yes	yes
baiap2l1a	387261	yes	yes	yes	ENSDARG00000029305
baiap2l1b	550528	yes	yes	yes	ENSDARG00000031119
baiap2l2a	394210	yes	yes	yes	ENSDARG00000016483
baiap2l2b	564798	yes	yes	yes	ENSDARG00000060933
baiap3	564728	yes	yes	yes	ENSDARG00000079264
bambia	83496	yes	yes	yes	ENSDARG00000055381
bambib	431736	yes	yes	yes	ENSDARG00000099677
banf1	334717	yes	yes	yes	ENSDARG00000037009
banp	553659	yes	yes	yes	ENSDARG00000017562
bap1	558885	yes	yes	yes	ENSDARG00000063051
bard1	100147913	yes	yes	yes	ENSDARG00000076733
barhl1a	550407	yes	yes	yes	ENSDARG00000112355
barhl1b	553186	yes	yes	yes	ENSDARG00000113145
barhl2	100001699	yes	yes	yes	ENSDARG00000115723
barx1	553644	yes	yes	yes	ENSDARG00000007407
barx2	100002200	yes	yes	yes	ENSDARG00000041098
basp1	569631	yes	yes	yes	ENSDARG00000110677
batf	564589	yes	yes	yes	ENSDARG00000011818
batf3	751677	yes	yes	yes	ENSDARG00000042577
baxa	58081	yes	yes	yes	ENSDARG00000020623
baxb	503609	yes	yes	yes	ENSDARG00000030881
baz1a	334173	yes	yes	yes	ENSDARG00000099745
baz1b	571727	yes	yes	yes	ENSDARG00000114866
baz2a	450079	yes	yes	yes	ENSDARG00000102974
baz2ba	561095	yes	yes	yes	ENSDARG00000057782
bbc3	751763	yes	yes	yes	ENSDARG00000069282
bbip1	795943	yes	yes	yes	ENSDARG00000116522
bbox1	572649	yes	yes	yes	ENSDARG00000113482
bbs1	568986	yes	yes	yes	ENSDARG00000114301
bbs10	100034535	yes	yes	yes	ENSDARG00000110925
bbs12	570583	yes	yes	yes	ENSDARG00000016112
bbs2	259187	yes	yes	yes	ENSDARG00000110124
bbs4	768303	yes	yes	yes	ENSDARG00000063522
bbs5	393269	yes	yes	yes	ENSDARG00000039827
bbs7	557491	yes	yes	yes	ENSDARG00000059911
bbs9	100333716	yes	yes	yes	ENSDARG00000113486
bbx	100005540	yes	yes	yes	ENSDARG00000012699
bc2	798901	yes	yes	yes	ENSDARG00000053979
bcam	767689	yes	yes	yes	ENSDARG00000090190
bcan	334113	yes	yes	yes	ENSDARG00000099412
bcap29	554151	yes	yes	yes	ENSDARG00000016231
bcap31	368488	yes	yes	yes	ENSDARG00000044972
bcar1	568309	yes	yes	yes	ENSDARG00000056525
bcar3	570610	yes	yes	yes	ENSDARG00000016981
bcas2	493614	yes	yes	yes	ENSDARG00000043631
bcas3	393594	yes	yes	yes	ENSDARG00000114497
bcat1	337412	yes	yes	yes	ENSDARG00000045568
bcat2	436949	yes	yes	yes	ENSDARG00000054849
bccip	541348	yes	yes	yes	ENSDARG00000004948
bckdha	554124	yes	yes	yes	ENSDARG00000111762
bckdhb	569980	yes	yes	yes	ENSDARG00000014676
bckdhbl	555648	yes	yes	yes	ENSDARG00000093569
bckdk	282677	yes	yes	yes	ENSDARG00000016904
bcl10	100334750	yes	yes	yes	ENSDARG00000077130
bcl11aa	678650	yes	yes	yes	ENSDARG00000061352
bcl11ab	566491	yes	yes	yes	ENSDARG00000063153
bcl11ba	100093707	yes	yes	yes	ENSDARG00000062510
bcl2a	570772	yes	yes	yes	ENSDARG00000094704
bcl2b	100007048	yes	yes	yes	ENSDARG00000089109
bcl2l1	114401	yes	yes	yes	ENSDARG00000008434
bcl2l10	373113	yes	yes	yes	ENSDARG00000026766
bcl2l11	100190951	yes	yes	no	ENSDARG00000079144
bcl2l13	559355	yes	yes	yes	ENSDARG00000111116
bcl2l16	100359374	yes	yes	yes	ENSDARG00000114237
bcl3	565656	yes	yes	yes	ENSDARG00000087832
bcl6a	393707	yes	yes	yes	ENSDARG00000116260
bcl6ab	100001936	yes	yes	yes	ENSDARG00000069295
bcl6b	793278	yes	yes	yes	ENSDARG00000114369
bcl7a	57952	yes	yes	yes	ENSDARG00000111533
bcl7ba	406444	yes	yes	yes	ENSDARG00000111877
bcl7bb	81595	yes	yes	yes	ENSDARG00000116093
bcl9	449616	yes	yes	yes	ENSDARG00000036687
bcl9l	449532	yes	yes	yes	ENSDARG00000055054
bco1	84039	yes	yes	yes	ENSDARG00000104256
bco1l	393580	yes	yes	yes	ENSDARG00000103659
bco2a	793849	yes	yes	yes	ENSDARG00000055722
bco2b	678554	yes	yes	yes	ENSDARG00000041715
bco2l	84041	yes	yes	yes	ENSDARG00000027620
bcor	402921	yes	yes	yes	ENSDARG00000017798
bcorl1	792710	yes	yes	yes	ENSDARG00000077912
bcr	568320	yes	yes	yes	ENSDARG00000079286
bcs1l	394157	yes	yes	yes	ENSDARG00000012295
bdh1	100037356	yes	yes	yes	ENSDARG00000059388
bdh2	550507	yes	yes	yes	ENSDARG00000052696
bdkrb1	368199	yes	yes	no	ENSDARG00000020744
bdkrb2	100330960	yes	yes	yes
bdnf	58118	yes	yes	yes	ENSDARG00000018817
bean1	101885923	yes	yes	yes	ENSDARG00000087413
becn1	393846	yes	yes	yes	ENSDARG00000079128
bend3	565716	yes	yes	yes	ENSDARG00000076903
bend4	566937	yes	yes	yes	ENSDARG00000113607
bend5	566161	yes	yes	yes	ENSDARG00000075624
best1	560608	yes	yes	yes	ENSDARG00000078331
best2	567214	yes	yes	yes	ENSDARG00000079163
best4	563711	yes	yes	yes	ENSDARG00000078455
bet1	415135	yes	yes	yes	ENSDARG00000113480
bet1l	445493	yes	yes	yes	ENSDARG00000032037
bfb	30489	yes	yes	yes	ENSDARG00000110364
bfsp1	560018	yes	yes	yes
bfsp2	494090	yes	yes	yes	ENSDARG00000011998
bglap	792433	yes	yes	yes	ENSDARG00000058414
bglapl	337724	yes	yes	yes	ENSDARG00000104467
bgna	431774	yes	yes	yes	ENSDARG00000017884
bgnb	792197	yes	yes	yes	ENSDARG00000110495
bhlha15	777671	yes	yes	yes	ENSDARG00000045166
bhlha9	323481	yes	yes	yes	ENSDARG00000113055
bhlhe22	393930	yes	yes	yes	ENSDARG00000058039
bhlhe23	559796	yes	yes	yes	ENSDARG00000037588
bhlhe40	324413	yes	yes	yes	ENSDARG00000004060
bhlhe41	563771	yes	yes	yes	ENSDARG00000112123
bhmt	322228	yes	yes	yes	ENSDARG00000013430
bicc1a	568201	yes	yes	yes	ENSDARG00000061682
bicc1b	571411	yes	yes	yes	ENSDARG00000070497
bicc2	402785	yes	yes	yes	ENSDARG00000076557
bicd1a	556758	yes	yes	yes	ENSDARG00000113004
bicd2	557383	yes	yes	yes	ENSDARG00000075571
bicdl1	100537719	yes	yes	yes	ENSDARG00000074761
bicra	386775	yes	yes	yes	ENSDARG00000061159
bicral	559084	yes	yes	yes	ENSDARG00000016089
bida	559425	yes	yes	yes	ENSDARG00000112031
bik	564030	yes	yes	yes	ENSDARG00000045549
bin1b	447863	yes	yes	yes	ENSDARG00000058820
bin2a	492780	yes	yes	yes	ENSDARG00000003219
bin2b	327387	yes	yes	yes	ENSDARG00000010255
bin3	323976	yes	yes	yes	ENSDARG00000099651
birc2	373107	yes	yes	yes	ENSDARG00000117094
birc5a	373110	yes	yes	yes	ENSDARG00000075621
birc5b	246726	yes	yes	yes	ENSDARG00000110817
birc6	796547	yes	yes	yes	ENSDARG00000115931
birc6-as2	101885944	no	no	no	ENSDARG00000097706
birc7	100073331	yes	yes	yes	ENSDARG00000109504
blcap	57918	yes	yes	yes	ENSDARG00000052073
blf	503516	yes	yes	yes	ENSDARG00000043126
blk	567764	yes	yes	yes	ENSDARG00000007783
blm	572540	yes	yes	yes	ENSDARG00000077089
blmh	336541	yes	yes	yes	ENSDARG00000025977
blnk	405764	yes	yes	yes	ENSDARG00000042722
bloc1s1	556597	yes	yes	yes	ENSDARG00000014171
bloc1s2	606665	yes	yes	yes	ENSDARG00000046081
bloc1s3	553529	yes	yes	yes	ENSDARG00000068828
bloc1s4	445081	yes	yes	yes	ENSDARG00000007597
bloc1s5	324781	yes	yes	yes	ENSDARG00000111747
bloc1s6	791215	yes	yes	yes	ENSDARG00000042933
blvra	767661	yes	yes	yes	ENSDARG00000059857
blvrb	436959	yes	yes	yes	ENSDARG00000096829
blzf1	114452	yes	yes	yes	ENSDARG00000011299
bmb	559540	yes	yes	yes	ENSDARG00000096603
bmf1	571949	yes	yes	no	ENSDARG00000090234
bmf2	751764	yes	yes	yes	ENSDARG00000116024
bmi1a	321505	yes	yes	yes	ENSDARG00000006010
bmi1b	394249	yes	yes	yes	ENSDARG00000013076
bmp10	562533	yes	yes	yes	ENSDARG00000061769
bmp15	334183	yes	yes	yes	ENSDARG00000037491
bmp16	100329171	yes	yes	yes	ENSDARG00000103679
bmp1a	572452	yes	yes	yes	ENSDARG00000028071
bmp1b	559877	yes	yes	yes	ENSDARG00000028053
bmp2a	30631	yes	yes	no	ENSDARG00000013409
bmp2b	30632	yes	yes	yes	ENSDARG00000115191
bmp2k	494101	yes	yes	yes	ENSDARG00000115681
bmp3	777717	yes	yes	yes	ENSDARG00000109238
bmp4	30612	yes	yes	yes	ENSDARG00000019995
bmp5	394026	yes	yes	yes	ENSDARG00000101701
bmp6	503761	yes	yes	yes	ENSDARG00000015686
bmp7a	30584	yes	yes	yes	ENSDARG00000018260
bmp7b	557567	yes	yes	yes	ENSDARG00000063230
bmp8a	561963	yes	yes	yes	ENSDARG00000035677
bmper	338246	yes	yes	yes	ENSDARG00000101980
bmpr1aa	58145	yes	yes	yes	ENSDARG00000115025
bmpr1ab	447846	yes	yes	yes	ENSDARG00000105045
bmpr1ba	30742	yes	yes	yes	ENSDARG00000104100
bmpr1bb	100149664	yes	yes	yes	ENSDARG00000102742
bmpr2a	562822	yes	yes	yes	ENSDARG00000011941
bmpr2b	555655	yes	yes	yes	ENSDARG00000020057
bms1	553241	yes	yes	yes	ENSDARG00000054154
bmt2	558558	yes	yes	yes	ENSDARG00000109484
bnc1	568786	yes	yes	yes	ENSDARG00000100757
bnc2	559327	yes	yes	yes	ENSDARG00000069989
bnip1a	565822	yes	yes	yes	ENSDARG00000114927
bnip1b	795732	yes	yes	yes	ENSDARG00000104280
bnip2	394197	yes	yes	yes	ENSDARG00000013397
bnip3	336116	yes	yes	yes	ENSDARG00000099961
bnip3la	323563	yes	yes	yes	ENSDARG00000025468
bnip3lb	554650	yes	yes	yes	ENSDARG00000028067
bnip4	568155	yes	yes	yes	ENSDARG00000117207
bnipl	100149386	yes	yes	yes	ENSDARG00000060435
boc	334628	yes	yes	yes	ENSDARG00000074335
bod1	767743	yes	yes	yes	ENSDARG00000103922
bod1l1	100332682	yes	yes	yes	ENSDARG00000089505
boka	445218	yes	yes	yes	ENSDARG00000052129
bokb	394160	yes	yes	yes	ENSDARG00000008807
bola1	445163	yes	yes	yes	ENSDARG00000039915
bola3	445131	yes	yes	yes	ENSDARG00000098130
bop1	777627	yes	yes	yes	ENSDARG00000063627
bora	555606	yes	yes	yes	ENSDARG00000112916
borcs5	449650	yes	yes	yes	ENSDARG00000077830
borcs7	664759	yes	yes	yes	ENSDARG00000055070
borcs8	558180	yes	yes	yes	ENSDARG00000071339
bpgm	436903	yes	yes	yes	ENSDARG00000070826
bphl	402804	yes	yes	yes	ENSDARG00000102877
bpifcl	100003132	yes	yes	yes	ENSDARG00000099980
bpnt1	436627	yes	yes	yes	ENSDARG00000043684
bptf	324479	yes	yes	yes	ENSDARG00000077361
braf	403065	yes	yes	yes	ENSDARG00000017661
brap	436739	yes	yes	yes	ENSDARG00000008560
brat1	678547	yes	yes	yes	ENSDARG00000062585
brca2	566758	yes	yes	yes	ENSDARG00000079015
brcc3	100333845	yes	yes	yes	ENSDARG00000098242
brd1a	569574	yes	yes	yes	ENSDARG00000116694
brd1b	100009661	yes	yes	yes	ENSDARG00000051798
brd2a	30445	yes	yes	yes	ENSDARG00000022280
brd2b	569354	yes	yes	yes	ENSDARG00000046087
brd3a	327372	yes	yes	yes	ENSDARG00000006527
brd3b	327108	yes	yes	yes	ENSDARG00000100129
brd4	570531	yes	yes	yes	ENSDARG00000078904
brd7	406675	yes	yes	yes	ENSDARG00000008380
brd8	337414	yes	yes	yes	ENSDARG00000025071
brd9	393245	yes	yes	yes	ENSDARG00000017143
brdt	333996	yes	yes	yes	ENSDARG00000102802
brf1a	334402	yes	yes	yes	ENSDARG00000017835
brf1b	334316	yes	yes	yes	ENSDARG00000115325
brf2	445142	yes	yes	yes	ENSDARG00000002060
bri3	100002236	yes	yes	yes	ENSDARG00000086332
bri3bp	327046	yes	yes	yes	ENSDARG00000010108
bricd5	792755	yes	yes	yes	ENSDARG00000056247
brinp1	100334375	yes	yes	yes	ENSDARG00000078302
brinp2	561009	yes	yes	yes	ENSDARG00000014302
brinp3a.1	569746	yes	yes	yes	ENSDARG00000076351
brinp3a.2	100001603	yes	yes	yes	ENSDARG00000061051
brinp3b	100330048	yes	yes	yes	ENSDARG00000075352
brip1	794038	yes	yes	yes	ENSDARG00000113993
brk1	415187	yes	yes	yes	ENSDARG00000041974
brms1	791681	yes	yes	yes	ENSDARG00000051955
brms1la	792017	yes	yes	yes	ENSDARG00000006235
brms1lb	562889	yes	yes	yes	ENSDARG00000018047
brox	492786	yes	yes	yes	ENSDARG00000013659
brpf1	393991	yes	yes	yes
brpf3a	100149254	yes	yes	yes	ENSDARG00000110187
brpf3b	100003354	yes	yes	yes	ENSDARG00000074238
brsk2a	100334759	yes	yes	yes	ENSDARG00000061421
brsk2b	100149571	yes	yes	yes	ENSDARG00000077791
brwd1	798858	yes	yes	yes	ENSDARG00000111353
brwd3	553209	yes	yes	yes	ENSDARG00000109876
bscl2	567403	yes	yes	yes	ENSDARG00000037008
bscl2l	541427	yes	yes	yes	ENSDARG00000025912
bsdc1	794882	yes	yes	yes	ENSDARG00000116408
bsg	337692	yes	yes	yes	ENSDARG00000019881
bsk146	405767	yes	yes	yes	ENSDARG00000099069
bsna	100004063	yes	yes	yes
bsnb	101175706	yes	yes	yes	ENSDARG00000079161
bsnd	497323	yes	yes	yes	ENSDARG00000086265
bspry	559377	yes	yes	yes	ENSDARG00000104875
bsx	573364	yes	yes	yes	ENSDARG00000110782
btaf1	565357	yes	yes	yes	ENSDARG00000060089
btbd10a	560466	yes	yes	yes	ENSDARG00000062674
btbd10b	557247	yes	yes	yes	ENSDARG00000115689
btbd11a	562893	yes	yes	yes	ENSDARG00000063255
btbd11b	100034519	yes	yes	yes	ENSDARG00000063040
btbd16	565632	yes	yes	yes	ENSDARG00000027710
btbd17a	563263	yes	yes	yes	ENSDARG00000099321
btbd17b	563672	yes	yes	yes	ENSDARG00000112615
btbd18	100538298	yes	yes	no
btbd2a	565970	yes	yes	yes	ENSDARG00000116244
btbd3a	563691	yes	yes	yes	ENSDARG00000005544
btbd3b	562593	yes	yes	yes	ENSDARG00000087517
btbd6a	100141360	yes	yes	yes	ENSDARG00000076440
btbd6b	553533	yes	yes	yes	ENSDARG00000114044
btbd7	568372	yes	yes	yes	ENSDARG00000003069
btbd9	557659	yes	yes	yes	ENSDARG00000068983
btc	503869	yes	yes	yes	ENSDARG00000110368
btd	555376	yes	yes	yes	ENSDARG00000099596
btf3	556625	yes	yes	yes	ENSDARG00000116462
btf3l4	393667	yes	yes	yes	ENSDARG00000089681
btg1	114432	yes	yes	yes	ENSDARG00000027249
btg2	30079	yes	yes	yes	ENSDARG00000020298
btg3	492479	yes	yes	yes	ENSDARG00000115730
btg4	378946	yes	yes	yes	ENSDARG00000109355
btk	568653	yes	yes	yes	ENSDARG00000113249
btr01	563047	yes	yes	yes	ENSDARG00000051965
btr02	562439	yes	yes	yes	ENSDARG00000052215
btr04	565512	yes	yes	yes	ENSDARG00000060962
btr05	794264	yes	yes	yes	ENSDARG00000074813
btr06	100151764	yes	yes	yes	ENSDARG00000105558
btr07	793570	yes	yes	yes	ENSDARG00000105558
btr09	100170790	yes	yes	yes	ENSDARG00000115798
btr12	767681	yes	yes	yes	ENSDARG00000051809
btr16	767728	yes	yes	yes	ENSDARG00000095113
btr18	571162	yes	yes	yes	ENSDARG00000103618
btr20	678596	yes	yes	yes	ENSDARG00000102992
btr22	100144555	yes	yes	yes	ENSDARG00000103618
btr23	100334710	yes	yes	yes	ENSDARG00000099509
btr24	100000030	yes	yes	yes	ENSDARG00000102143
btr25	571141	yes	yes	yes	ENSDARG00000102018
btr26	100149795	yes	yes	yes	ENSDARG00000105241
btr29	797384	yes	yes	yes	ENSDARG00000099138
btr30	393394	yes	yes	yes	ENSDARG00000102591
btr31	555877	yes	yes	yes	ENSDARG00000096304
btr32	678629	yes	yes	yes	ENSDARG00000053940
btr33	799840	yes	yes	yes	ENSDARG00000008164
bub1	100307076	yes	yes	yes	ENSDARG00000077029
bub1ba	567931	yes	yes	yes	ENSDARG00000078825
bub1bb	567006	yes	yes	yes	ENSDARG00000074927
bub3	403012	yes	yes	yes	ENSDARG00000075883
buc	334375	yes	yes	yes	ENSDARG00000096095
buc2l	100537720	yes	yes	yes	ENSDARG00000096628
bud23	572367	yes	yes	yes	ENSDARG00000063596
bud31	445383	yes	yes	yes	ENSDARG00000017084
bves	415107	yes	yes	yes	ENSDARG00000058548
bxdc2	402823	yes	yes	yes	ENSDARG00000098935
bysl	394081	yes	yes	yes	ENSDARG00000001057
bzw1a	325226	yes	yes	yes	ENSDARG00000010481
bzw1b	406812	yes	yes	yes	ENSDARG00000099148
bzw2	393892	yes	yes	yes	ENSDARG00000035918
c10h21orf59	792532	yes	yes	yes	ENSDARG00000111366
c13h10orf11	553730	yes	yes	yes	ENSDARG00000057166
c13h10orf71	101884346	yes	yes	yes
c13h7orf72	101884205	yes	yes	yes	ENSDARG00000109818
c14h4orf45	103908779	yes	yes	yes
c15h3orf80	101887089	yes	yes	yes
c16h2orf66	103908919	yes	yes	yes	ENSDARG00000116758
c16h7orf31	103908922	yes	yes	yes
c17h14orf132	103909003	yes	yes	yes	ENSDARG00000108781
c17h14orf159	560387	yes	yes	yes	ENSDARG00000005179
c17h15orf52	796966	yes	yes	yes
c18h15orf65	103909108	yes	yes	yes
c18h3orf33	565816	yes	yes	yes	ENSDARG00000040582
c19h1orf109	286778	yes	yes	yes	ENSDARG00000012113
c19h1orf216	101883800	yes	yes	yes
c1d	474329	yes	yes	yes	ENSDARG00000021112
c1galt1a	557675	yes	yes	yes	ENSDARG00000112143
c1galt1b	337131	yes	yes	yes	ENSDARG00000113870
c1galt1c1	324052	yes	yes	yes	ENSDARG00000036335
c1qa	553548	yes	yes	yes	ENSDARG00000109639
c1qb	445088	yes	yes	yes	ENSDARG00000044612
c1qbp	334619	yes	yes	yes	ENSDARG00000039887
c1qc	449803	yes	yes	yes	ENSDARG00000109447
c1ql1	556064	yes	yes	yes	ENSDARG00000028521
c1ql2	100005110	yes	yes	yes	ENSDARG00000015592
c1ql3a	100151368	yes	yes	yes	ENSDARG00000010350
c1ql3b	403002	yes	yes	yes	ENSDARG00000036483
c1ql4a	559288	yes	yes	yes	ENSDARG00000115758
c1ql4b	567540	yes	yes	yes	ENSDARG00000113446
c1ql4l	100007371	yes	yes	yes	ENSDARG00000110017
c1qtnf1	550573	yes	yes	yes	ENSDARG00000088878
c1qtnf12	790933	yes	yes	yes	ENSDARG00000070681
c1qtnf2	572041	yes	yes	yes	ENSDARG00000059944
c1qtnf4	550397	yes	yes	yes	ENSDARG00000024299
c1qtnf5	555815	yes	yes	yes	ENSDARG00000056134
c1qtnf6a	565113	yes	yes	yes	ENSDARG00000055175
c1qtnf6b	570839	yes	yes	yes	ENSDARG00000006544
c1qtnf7	564609	yes	yes	yes	ENSDARG00000074949
c1qtnf9	799425	yes	yes	yes	ENSDARG00000112904
c1r	560927	yes	yes	yes	ENSDARG00000100248
c1s	793529	no	no	no	ENSDARG00000100599
c20h2orf81	100536360	yes	yes	yes
c23h1orf87	103909720	yes	yes	yes
c23h20orf24	334006	yes	yes	yes	ENSDARG00000074790
c24h18orf63	110437831	yes	yes	no	ENSDARG00000100251
c24h7orf50	567594	yes	yes	yes	ENSDARG00000045254
c25h12orf75	100535414	yes	yes	yes	ENSDARG00000100152
c2cd2	100332559	yes	yes	yes	ENSDARG00000105000
c2cd2l	566488	yes	yes	yes	ENSDARG00000061066
c2cd3	797081	yes	yes	yes	ENSDARG00000074137
c2cd4a	569005	yes	yes	yes	ENSDARG00000061416
c2cd5	393585	yes	yes	yes	ENSDARG00000094590
c2h1orf27	393588	yes	yes	yes	ENSDARG00000042671
c3a.1	321046	yes	yes	yes	ENSDARG00000012694
c3a.2	30491	yes	yes	yes	ENSDARG00000087359
c3a.3	565074	yes	yes	yes	ENSDARG00000052207
c3a.4	100331428	yes	yes	yes	ENSDARG00000093198
c3a.6	494039	yes	yes	yes	ENSDARG00000043719
c3ar1	794255	yes	yes	yes	ENSDARG00000031749
c3b.1	563665	yes	yes	yes	ENSDARG00000093068
c3b.2	566347	yes	yes	yes	ENSDARG00000115568
c4	566261	yes	yes	yes	ENSDARG00000015065
c5	565774	yes	yes	yes	ENSDARG00000021004
c5ar1	100000959	yes	yes	yes	ENSDARG00000040319
c5h9orf84	100002712	yes	yes	yes
c6	393611	yes	yes	yes	ENSDARG00000115290
c6ast1	751088	yes	yes	no	ENSDARG00000069216
c6ast3	541399	yes	yes	yes	ENSDARG00000024503
c6ast4	574001	yes	yes	yes	ENSDARG00000052578
c6h1orf226	108179105	yes	yes	yes
c7a	562475	yes	yes	yes	ENSDARG00000042172
c7b	570832	yes	yes	yes	ENSDARG00000114734
c8a	445102	yes	yes	yes	ENSDARG00000039516
c8b	793127	yes	yes	yes	ENSDARG00000039517
c8g	393837	yes	yes	yes	ENSDARG00000032098
c8h22orf15	101886360	yes	yes	yes
c9	554141	yes	yes	yes	ENSDARG00000016319
c9hxorf21	796876	yes	yes	yes
ca10a	641327	yes	yes	yes	ENSDARG00000052644
ca10b	568543	yes	yes	yes	ENSDARG00000009568
ca12	100537787	yes	yes	yes	ENSDARG00000045644
ca14	567897	yes	yes	yes	ENSDARG00000061697
ca15a	553469	yes	yes	yes	ENSDARG00000015654
ca15b	791844	yes	yes	yes	ENSDARG00000040510
ca15c	768190	yes	yes	yes	ENSDARG00000002259
ca16b	569183	yes	yes	yes	ENSDARG00000110045
ca16c	497461	yes	yes	yes	ENSDARG00000051814
ca2	387526	yes	yes	yes	ENSDARG00000014488
ca4a	555196	yes	yes	yes	ENSDARG00000043589
ca4b	553246	yes	yes	yes	ENSDARG00000042293
ca4c	407683	yes	yes	yes	ENSDARG00000044512
ca5a	569989	yes	yes	yes	ENSDARG00000111390
ca6	100006448	yes	yes	yes	ENSDARG00000110050
ca7	564201	yes	yes	yes	ENSDARG00000113549
ca8	550233	yes	yes	yes	ENSDARG00000039098
ca9	566612	yes	yes	yes	ENSDARG00000102300
caap1	100329847	yes	yes	yes	ENSDARG00000079652
cab39	415235	yes	yes	yes	ENSDARG00000043451
cab39l	492361	yes	yes	yes	ENSDARG00000036658
cab39l1	406822	yes	yes	yes	ENSDARG00000112995
cabin1	571383	yes	yes	yes	ENSDARG00000079326
cables1	100126070	yes	yes	yes	ENSDARG00000099395
cables2a	100148748	yes	yes	yes	ENSDARG00000076964
cables2b	564291	yes	yes	yes	ENSDARG00000017154
cabp1a	449789	yes	yes	yes	ENSDARG00000019990
cabp1b	436687	yes	yes	yes	ENSDARG00000033411
cabp2a	572226	yes	yes	yes	ENSDARG00000052016
cabp2b	559616	yes	yes	yes	ENSDARG00000052277
cabp4	797905	yes	yes	yes	ENSDARG00000008866
cabp5a	393671	yes	yes	yes	ENSDARG00000002576
cabp5b	553766	yes	yes	yes	ENSDARG00000028485
cabp7b	556082	yes	yes	yes	ENSDARG00000060846
cabz01076234.2	100332077	yes	yes	yes	ENSDARG00000067794
cabz01093075.1	100329767	yes	yes	yes	ENSDARG00000086616
cachd1	794807	yes	yes	yes	ENSDARG00000113216
cacna1aa	562059	yes	yes	yes	ENSDARG00000037905
cacna1ab	569528	yes	yes	yes	ENSDARG00000006923
cacna1ba	555941	yes	yes	yes	ENSDARG00000021735
cacna1bb	562796	yes	yes	yes	ENSDARG00000116562
cacna1c	170581	yes	yes	yes	ENSDARG00000008398
cacna1da	403310	yes	yes	yes	ENSDARG00000102773
cacna1db	403311	yes	no	yes
cacna1e	564274	yes	yes	yes	ENSDARG00000062346
cacna1eb	567702	yes	yes	yes	ENSDARG00000095614
cacna1fa	793708	yes	yes	yes
cacna1fb	559964	yes	yes	yes	ENSDARG00000112226
cacna1g	563904	yes	yes	yes	ENSDARG00000089913
cacna1ha	560875	yes	yes	yes	ENSDARG00000060496
cacna1hb	100007317	yes	yes	yes	ENSDARG00000099708
cacna1i	566351	yes	yes	yes	ENSDARG00000070522
cacna1sa	570683	yes	yes	yes	ENSDARG00000029457
cacna1sb	405791	yes	yes	yes	ENSDARG00000042552
cacna2d1	101882457	yes	yes	yes	ENSDARG00000073752
cacna2d1a	561434	yes	yes	yes	ENSDARG00000014804
cacna2d2a	541376	yes	yes	yes	ENSDARG00000103390
cacna2d2b	568759	yes	yes	yes	ENSDARG00000078169
cacna2d3	100148645	yes	yes	yes	ENSDARG00000078760
cacna2d3a	100535196	yes	yes	yes	ENSDARG00000106018
cacna2d4a	568225	yes	yes	yes	ENSDARG00000026855
cacna2d4b	100150428	yes	yes	yes	ENSDARG00000023886
cacnb1	436925	yes	yes	yes	ENSDARG00000002167
cacnb2a	795492	yes	yes	yes	ENSDARG00000099045
cacnb2b	558806	yes	yes	yes	ENSDARG00000055565
cacnb3a	565158	yes	yes	yes	ENSDARG00000113797
cacnb3b	559015	yes	yes	yes	ENSDARG00000076030
cacnb4a	562422	yes	yes	yes	ENSDARG00000009738
cacnb4b	678560	yes	yes	yes	ENSDARG00000062174
cacng1a	322013	yes	yes	yes	ENSDARG00000008772
cacng1b	571193	yes	yes	yes	ENSDARG00000052360
cacng2a	393614	yes	yes	yes	ENSDARG00000032565
cacng2b	569855	yes	yes	yes	ENSDARG00000102376
cacng3a	567438	yes	yes	yes	ENSDARG00000058460
cacng3b	564883	yes	yes	yes	ENSDARG00000076401
cacng4a	797554	yes	yes	yes	ENSDARG00000115540
cacng4b	794222	yes	yes	yes	ENSDARG00000074669
cacng5a	797409	yes	yes	yes	ENSDARG00000003326
cacng5b	100331116	yes	yes	yes	ENSDARG00000039240
cacng6a	100034580	yes	yes	yes	ENSDARG00000036457
cacng6b	100003220	yes	yes	yes	ENSDARG00000046079
cacng7a	100034540	yes	yes	yes	ENSDARG00000063006
cacng7b	100003278	yes	yes	yes	ENSDARG00000070624
cacng8a	550428	yes	yes	yes	ENSDARG00000020450
cacng8b	100003329	yes	yes	yes	ENSDARG00000070626
cactin	100126813	yes	yes	yes	ENSDARG00000059866
cacul1	100538081	yes	yes	yes	ENSDARG00000021885
cacybp	405823	yes	yes	yes	ENSDARG00000014731
cad	266992	yes	yes	yes	ENSDARG00000041895
cadm1a	569931	yes	yes	yes	ENSDARG00000031075
cadm1b	562183	yes	yes	no	ENSDARG00000042677
cadm2a	793954	yes	yes	yes	ENSDARG00000110607
cadm2b	571698	yes	yes	yes	ENSDARG00000062633
cadm3	692273	yes	yes	yes	ENSDARG00000057013
cadm4	492787	yes	yes	yes	ENSDARG00000040291
cadps2	407617	yes	yes	yes	ENSDARG00000117190
cadpsa	100333933	yes	yes	yes	ENSDARG00000043661
cadpsb	100001129	yes	yes	yes	ENSDARG00000070567
cahz	30331	yes	yes	yes	ENSDARG00000011166
calb1	100001650	yes	yes	yes	ENSDARG00000031598
calb2a	393691	yes	yes	yes	ENSDARG00000110220
calb2b	393684	yes	yes	yes	ENSDARG00000036344
calca	436744	yes	yes	yes	ENSDARG00000056590
calcoco1a	334971	yes	yes	yes	ENSDARG00000036695
calcoco1b	386968	yes	yes	yes	ENSDARG00000016391
calcoco2	553776	yes	yes	yes	ENSDARG00000052515
calcr	560268	yes	yes	yes	ENSDARG00000109526
calcrl2	100537117	yes	yes	yes	ENSDARG00000033955
calcrla	445508	yes	yes	yes	ENSDARG00000011473
calcrlb	567131	yes	yes	yes	ENSDARG00000011571
cald1a	322909	yes	yes	yes	ENSDARG00000112416
cald1b	563892	yes	yes	yes	ENSDARG00000086391
calhm1	100005176	yes	yes	yes	ENSDARG00000077021
calhm1	101887127	yes	yes	yes	ENSDARG00000005314
calhm2	368657	yes	yes	yes	ENSDARG00000039482
calhm3	100005130	yes	yes	yes	ENSDARG00000079602
calm1a	406660	yes	yes	yes	ENSDARG00000021811
calm1b	368217	yes	yes	yes	ENSDARG00000034187
calm2a	336121	yes	yes	yes	ENSDARG00000111871
calm2b	192322	yes	yes	yes	ENSDARG00000015050
calm3a	327379	yes	yes	yes	ENSDARG00000100825
calm3b	321808	yes	yes	yes	ENSDARG00000074057
calml4a	560151	yes	yes	yes	ENSDARG00000075800
calml4b	100321746	yes	yes	yes	ENSDARG00000059347
caln1	562420	yes	yes	yes	ENSDARG00000088898
caln2	100007635	yes	yes	yes	ENSDARG00000069766
calr	325317	yes	yes	yes	ENSDARG00000076290
calr3a	30248	yes	yes	yes	ENSDARG00000103979
calr3b	321315	yes	yes	yes	ENSDARG00000102808
calua	415241	yes	yes	yes	ENSDARG00000045676
calub	394057	yes	yes	yes	ENSDARG00000005115
caly	100307104	yes	yes	yes	ENSDARG00000036008
camk1a	555945	yes	yes	yes	ENSDARG00000114234
camk1b	794026	yes	yes	yes	ENSDARG00000029474
camk1da	100144566	yes	yes	yes	ENSDARG00000111604
camk1db	791176	yes	yes	yes	ENSDARG00000017446
camk1ga	335654	yes	yes	yes	ENSDARG00000044526
camk1gb	393802	yes	yes	yes	ENSDARG00000008788
camk2a	550436	yes	yes	yes	ENSDARG00000053617
camk2b	798222	yes	yes	yes	ENSDARG00000100089
camk2b1	562064	yes	yes	yes	ENSDARG00000011065
camk2d1	445208	yes	yes	yes	ENSDARG00000043010
camk2d2	436815	yes	yes	yes	ENSDARG00000014273
camk2g1	791855	yes	yes	yes	ENSDARG00000071395
camk2g2	793359	yes	yes	yes	ENSDARG00000116258
camk2n1a	553607	yes	yes	yes	ENSDARG00000025855
camk2n1b	100004137	yes	yes	yes
camk2n2	436915	yes	yes	yes	ENSDARG00000111102
camk4	550270	yes	yes	yes	ENSDARG00000005372
camkk1a	541526	yes	yes	yes	ENSDARG00000110417
camkk1b	100170786	yes	yes	yes	ENSDARG00000114689
camkva	567243	yes	yes	yes	ENSDARG00000027963
camkvb	393422	yes	yes	yes	ENSDARG00000117013
camkvl	553431	yes	yes	yes	ENSDARG00000057000
camlg	404622	yes	yes	yes	ENSDARG00000100409
camsap1a	402833	yes	yes	yes	ENSDARG00000019208
camsap1b	561094	yes	yes	yes	ENSDARG00000035122
camsap2a	562741	yes	yes	yes	ENSDARG00000111224
camsap2b	558673	yes	yes	yes
camsap3	556256	yes	yes	yes	ENSDARG00000059475
camta1	101883062	yes	yes	yes	ENSDARG00000105435
camta1a	797322	yes	yes	yes	ENSDARG00000116922
camta1b	497465	yes	yes	yes	ENSDARG00000007824
camta2	101886599	yes	no	no
cand1	406806	yes	yes	yes	ENSDARG00000017841
cand2	555955	yes	yes	no	ENSDARG00000109268
[truncated: 27,832 more rows]

## Sheet: 3 kdrlPos
Ens95 Gene Symbol	Ensdarg	NCBI ID	RefSeq 3'UTR	Ens95 kdrlPos Avg	Ens95 kdrl Lg2Fc	Ens95 kdrl padj	RefSeq kdrl PosAvg	RefSeq kdrl Lg2Fc	RefSeq kdrl padj	Ens95 enriched	RefSeq enriched
aak1a	ENSDARG00000011855	568999	yes	46.74	-0.109503	0.954935	169.498	-0.535179	0.499943	no	no
aatkb	ENSDARG00000104442	555739	yes	55.691	-1.32836	0.126707	280.14	-1.77948	0.0285985	no	no
abcb6b	ENSDARG00000074254	100004801	yes	3.88402	-0.662208	0.884349	102.499	0.0819023	0.944702	no	no
abcc5	ENSDARG00000061233	336147	yes	586.862	0.302278	0.705011	4741.23	-0.0491571	0.946051	no	no
abcc8b	ENSDARG00000077007	100329706	yes	173.648	0.711148	0.624055	233.919	0.805584	0.503048	no	no
abcf3	ENSDARG00000089705	100331227	yes	159.191	0.922826	0.324944	232.087	0.827889	0.166226	no	no
abcg2a	ENSDARG00000100075	735312	yes	3157.72	5.29195	1.78862e-22	5992.92	5.53874	1.48811e-17	yes	yes
abcg4a	ENSDARG00000061047	564842	no	7.71597	-1.20275	0.650815	8.0394	-1.3169	1
abhd11	ENSDARG00000069501	446169	yes	1.92798	-2.06661	0.524671	168.526	-0.976342	0.148883	no	no
abi3bpa	ENSDARG00000062156	101884149	yes	8.38618	-4.06475	1.00455e-06	29.71	-2.54085	0.00311187	no	no
abo	ENSDARG00000019207	563897	no	16.5044	1.21369	0.732359	16.506	1.50424	1
abr	ENSDARG00000095180	565190	yes	27.8066	0.340081	0.888782	454.735	0.325663	0.582041	no	no
acanb	ENSDARG00000045799	559593	yes	10.6708	-1.24155	0.561761	21.6821	-0.576658	0.809717	no	no
acer2	ENSDARG00000077782	100331179	yes	18.7584	2.15688	0.353783	65.887	1.96958	0.126102	no	no
acer3	ENSDARG00000093366	555411	yes	18.074	0.597361	0.784242	31.0211	1.06244	0.512003	no	no
ACKR2	ENSDARG00000086314	101887081	yes	292.876	3.87009	9.4314e-12	745.815	4.40425	9.6621e-16	yes	yes
ackr4a	ENSDARG00000078729	100003167	yes	7.44537	-0.380822	0.930782	15.1645	-1.1735	0.328053	no	no
aco1	ENSDARG00000026376	568448	yes	97.5025	0.313749	0.814718	778.257	0.826281	0.0717801	no	no
acod1	ENSDARG00000069844	795305	no	15.4249	-1.12364	0.634685	15.4355	-1.10805	0.610015
acot21	ENSDARG00000042513	562047	yes	0	-5.66908	0.0828918	0.642015	-4.39946	1	no	no
acoxl	ENSDARG00000020149	569104	yes	7.08882	-1.06805	0.739399	7.08632	-1.18933	1	no	no
acp2	ENSDARG00000007244	503759	no	54.692	-0.015001	0.994689	54.714	0.00266378	0.999623
acp7	ENSDARG00000102421	571830	yes	32.2078	0.373512	0.857935	84.5422	0.598425	0.572149	no	no
acsbg1	ENSDARG00000062077	100006023	yes	3.21263	-1.6854	0.585216	3.53535	-1.63656	1	no	no
acsl3a	ENSDARG00000032079	567157	yes	16.482	-0.135428	0.965391	17.125	0.267903	1	no	no
acss2l	ENSDARG00000069029	560020	yes	10.0248	-0.745293	0.790473	9.0511	-0.892137	1	no	no
acvr2ab	ENSDARG00000104700	100331014	yes	19.6491	-0.517179	0.803309	835.924	-0.666829	0.199295	no	no
acvr2ba	ENSDARG00000044422	30457	yes	68.076	0.110948	0.949385	634.524	-0.424718	0.395254	no	no
acvr2bb	ENSDARG00000103108	100331938	yes	18.9976	-1.0027	0.674348	28.0229	-1.0525	0.617304	no	no
acyp2	ENSDARG00000086271	101886626	yes	13.2241	-0.752754	0.742052	16.4499	-0.836571	0.64937	no	no
adam10b	ENSDARG00000015502	393392	yes	24.5009	-0.53717	0.754073	27.0904	-0.456346	0.756373	no	no
ADAM12	ENSDARG00000116062	101884222	yes	7.76484	-0.50105	0.887629				no	no
adamts1	ENSDARG00000103519	565145	yes	44.8429	0.723662	0.625234	815.427	0.65603	0.329865	no	no
adamts14	ENSDARG00000078494	101886422	yes	5.81772	-1.38485	0.630121	16.1375	-1.44463	0.186897	no	no
adamts15a	ENSDARG00000029124	569571	no	25.4986	-2.46164	0.000510237	25.4938	-2.46166	0.000522471
adamts16	ENSDARG00000074646	568792	yes	22.953	0.127091	0.96475	32.2737	-0.536467	0.652021	no	no
adamts17	ENSDARG00000075555	101884120	yes	12.5968	-0.800926	0.681284	78.7302	-1.64377	0.00410589	no	no
adamts3	ENSDARG00000060127	102467218	yes	14.4744	-1.14344	0.535269	20.6216	-1.43035	0.171666	no	no
adamts5	ENSDARG00000100307	565053	no	30.9608	-0.237549	0.89818	30.955	-0.237833	0.881179
adamts6	ENSDARG00000041982	569099	yes	19.0231	-0.833728	0.604717	29.9935	-1.28263	0.167759	no	no
ADAMTS7	ENSDARG00000102478	560364	yes	94.239	1.05946	0.232359	182.627	1.27278	0.0857024	no	no
adamts8a	ENSDARG00000007709	569618	yes	14.5165	-0.869176	0.790351	48.0453	-1.57157	0.106182	no	no
adap2	ENSDARG00000070565	100331455	yes	234.923	2.82089	2.77019e-07	715.784	3.26985	2.72064e-12	yes	yes
adarb2	ENSDARG00000071823	558149	yes	26.4435	-0.0558355	0.983071	32.2378	-0.254809	0.863668	no	no
adcy2a	ENSDARG00000058392	563724	yes	19.6045	-1.24639	0.56401	30.2074	-0.853942	0.704047	no	no
adcy3a	ENSDARG00000077145	571825	yes	12.5665	-0.927729	0.588299	32.2176	-0.371502	0.809918	no	no
adcy8	ENSDARG00000031783	100148976	yes	38.5555	-1.31896	0.525543	60.1466	-1.19982	0.34617	no	no
adcy9	ENSDARG00000100869	100333702	yes	85.5522	0.820902	0.397959	547.094	0.735582	0.085488	no	no
add1	ENSDARG00000103962	555511	yes	336.398	0.544291	0.574129	2080.28	0.807874	0.0648328	no	no
adgra2	ENSDARG00000076994	560700	no	288.52	1.47649	0.0381956	252.045	1.55854	0.0286547
adgrd2	ENSDARG00000103067	571770	yes	18.7655	-0.0218666	0.995039	21.0272	-1.29714	0.424809	no	no
adgre15	ENSDARG00000096588	100536619	yes	0	-6.38434	0.0138522	7.76569	-1.43582	1	no	no
adgre16	ENSDARG00000096622	110437794	yes				0.963023	-2.81351	1	no	no
adgre5b.3	ENSDARG00000112943	100536657	yes	88.7248	-0.259129	0.824445	299.775	0.48984	0.538851	no	no
adgrg2a	ENSDARG00000088137	101882832	yes	21.5634	-1.20413	0.316826	40.5623	-1.62824	0.107396	no	no
adgrl1a	ENSDARG00000089292	562531	yes	131.163	0.469563	0.686558	275.003	0.406604	0.592545	no	no
adora1a	ENSDARG00000070056	100007535	yes	0.320656	-4.59995	0.161633	1.28829	-4.74499	0.00172518	no	no
adora1b	ENSDARG00000075694	100150997	no	11.2942	-0.333082	0.903948	11.2938	-0.333439	1
adra1ab	ENSDARG00000027638	557259	yes	3.87034	-3.81722	0.00177148	9.36935	-3.52817	0.00496895	no	no
adra1ba	ENSDARG00000011317	100149100	yes	9.68842	-0.928625	0.695769	13.5452	-1.19619	0.385584	no	no
adra2a	ENSDARG00000040841	266750	yes	22.2531	0.298551	0.893291	75.1365	0.0181001	0.991201	no	no
adra2db	ENSDARG00000054667	266755	no	20.3615	0.80696	0.75633	20.6862	0.829728	0.718863
aff4	ENSDARG00000001857	556421	yes	443.86	1.14091	0.105532	2765.93	0.884666	0.0335984	no	no
agap3	ENSDARG00000087822	324332	yes	34.7647	-1.47848	0.101783	364.391	-1.06983	0.0246353	no	no
agtr1a	ENSDARG00000018616	794575	yes	5.16286	-0.911101	0.846892	8.06071	-0.449404	1	no	no
ahrra	ENSDARG00000099702	641291	yes	7.07773	-0.454047	0.894867	42.2908	0.388078	0.800984	no	no
aifm3	ENSDARG00000062780	100150876	yes	14.2269	0.0656663	0.987651	13.5495	-1.14811	0.377025	no	no
aipl2	ENSDARG00000098164	100534741	yes	29.0613	-0.850724	0.605262	31.9584	-1.40122	0.258069	no	no
ak1	ENSDARG00000001950	445486	yes	2382.64	1.81645	0.00278654	2603.87	1.83207	0.00235029	yes	yes
akap10	ENSDARG00000059549	566920	yes	16.4202	-0.215089	0.952805	1035.85	0.840769	0.0879116	no	no
AL645691.1	ENSDARG00000102561	100536867	yes				1.93457	-1.66805	1	no	no
AL831726.2	ENSDARG00000104185	101882696	yes	15.2053	1.748	0.584055	28.1467	1.74458	0.415315	no	no
AL831768.1	ENSDARG00000100923	100534861	yes	12.2695	0.160187	0.95909	17.41	0.582388	1	no	no
AL844172.1	ENSDARG00000113841	559910	yes				0.963023	-3.92029	1	no	no
AL929217.1	ENSDARG00000059891	562831	yes	0.643334	-4.00387	0.119749	0.964444	-3.37345	1	no	no
AL935044.1	ENSDARG00000088051	100537716	yes				1.93457	-2.06526	1	no	no
AL935199.1	ENSDARG00000077746	100001479	yes	11.6184	-0.354079	0.881406	26.7705	-0.649057	0.675887	no	no
AL935300.3	ENSDARG00000098661	101885450	yes	5.14263	-0.533416	0.918932	12.5822	0.151901	1	no	no
AL954146.1	ENSDARG00000038891	560023	yes	7.41959	-0.56459	0.890583	7.41444	-0.870957	1	no	no
AL954361.1	ENSDARG00000078364	570571	yes	6.12778	0.0751911	0.989609	8.06521	-0.446161	1	no	no
aldh3b2	ENSDARG00000035606	557008	yes	24.4487	0.288741	0.93198	260.276	-0.336512	0.645665	no	no
alox5a	ENSDARG00000057273	567204	yes	11.582	-0.615039	0.841112	37.3723	-0.674368	0.584516	no	no
ALOXE3	ENSDARG00000073781	794132	yes	0.9716	-3.3218	0.311688	6.13047	-1.18163	1	no	no
alp3	ENSDARG00000098063	100330410	no	5.8062	-0.739733	0.855237	5.80229	-0.740699	1
als2a	ENSDARG00000075111	557014	yes	74.0625	0.00870339	0.995932	348.368	0.752993	0.261112	no	no
alx1	ENSDARG00000062824	565176	no	5.79406	-2.24315	0.221805	5.79377	-2.24306	0.211684
amigo1	ENSDARG00000079620	100144409	yes	5.14333	-2.32732	0.230239	13.5023	-2.26551	0.0741341	no	no
amigo3	ENSDARG00000074469	100000131	yes	16.0682	-1.13287	0.540725	159.712	-0.131988	0.899295	no	no
ampd2a	ENSDARG00000104491	100330772	yes	65.3706	0.501699	0.668805	1462.26	0.540344	0.401046	no	no
angpt2a	ENSDARG00000014946	101101687	no	1293.07	6.6103	1.27357e-22	1290.55	6.60741	1.0615e-22
angpt2b	ENSDARG00000053906	114408	yes	4.18673	-2.30342	0.271477	3.86346	-2.32565	1	no	no
ank2a	ENSDARG00000009026	568926	yes	88.9263	-1.71475	0.000829609	224.005	-1.82162	0.00730497	no	no
ankrd11	ENSDARG00000051886	327352	yes	8427.8	0.424783	0.434385	12087	0.420511	0.376121	no	no
ankrd13a	ENSDARG00000061901	556837	yes	69.6548	1.16817	0.158095	338.75	0.82713	0.185058	no	no
ankrd2	ENSDARG00000002722	101886079	no				0.963023	-2.88338	1
ankrd27	ENSDARG00000089207	386887	no	26.1519	0.210138	0.93075	29.379	0.203824	0.907038
ankrd33aa	ENSDARG00000055638	557568	yes	19.3471	-2.82766	0.00362877	29.0434	-2.4199	0.00640571	no	no
ankrd33bb	ENSDARG00000015589	557905	yes	10.6408	-0.51406	0.833117	47.7233	-1.53159	0.0168063	no	no
ankrd34ba	ENSDARG00000077086	560938	yes	12.2844	-0.00203345	0.999827	31.2618	-0.211112	0.892406	no	no
ankrd34bb	ENSDARG00000061641	565548	yes	15.4425	-1.03534	0.576117	60.349	-0.871637	0.52475	no	no
ankrd44	ENSDARG00000026028	561373	yes	25.812	-0.0196984	0.993566	401.6	0.0975865	0.926802	no	no
anks1aa	ENSDARG00000062396	100334911	yes	11.3052	0.542585	0.889914	14.1985	0.549632	1	no	no
ano1	ENSDARG00000102335	407698	yes	7.71799	-1.25529	0.664098	109.772	-0.787384	0.409245	no	no
ano5a	ENSDARG00000015731	100534737	yes	96.6109	2.09557	0.0285821	181.221	1.69797	0.0402083	yes	yes
ANO7	ENSDARG00000104834	556876	yes	288.452	5.27796	2.98763e-13	428.387	5.28553	9.65558e-20	yes	yes
ano8a	ENSDARG00000076265	562947	yes	20.2372	-1.07589	0.582226	26.3667	-1.3707	0.350776	no	no
antxr1a	ENSDARG00000025672	793153	yes	0.641311	-4.81308	0.0271317	12.9505	-1.58189	0.464262	no	no
antxr2b	ENSDARG00000063011	560841	no	5.17223	-1.04312	0.768605	5.17334	-1.08544	1
ap3b1a	ENSDARG00000100082	563316	yes	256.219	1.42697	0.0100214	1071.83	1.51513	0.00158593	yes	yes
AP3B2	ENSDARG00000105296	100000165	no	61.7294	-1.31192	0.303399	70.7875	-1.27531	0.204003
ap5z1	ENSDARG00000078111	100537934	yes	35.0613	-0.704835	0.647397	99.6869	0.204494	0.83124	no	no
apbb3	ENSDARG00000053771	101883158	yes	7.40969	-1.36095	0.448289	26.6722	-1.4193	0.349832	no	no
apc2	ENSDARG00000063007	565771	no	70.2978	-1.20926	0.155053	69.6679	-1.22822	0.136629
apeh	ENSDARG00000008703	100333019	yes	40.8852	0.138647	0.95226	332.273	0.545908	0.402107	no	no
apobec2b	ENSDARG00000113992	567047	no	29.0442	0.710502	0.674104	28.7182	0.694586	0.650843
aqp3b	ENSDARG00000069518	568049	no	23.1621	2.58204	0.314797	23.1651	2.58245	1
aqr	ENSDARG00000016775	393436	yes	255.526	0.559254	0.462838	376.453	0.499354	0.47719	no	no
arf4b	ENSDARG00000100339	550402	yes	63.0925	0.522069	0.807458	99.5208	0.479975	0.777299	no	no
arfgap1	ENSDARG00000101616	100149572	yes	13.8213	0.247985	0.94305	663.419	0.758269	0.223865	no	no
arfgef3	ENSDARG00000077656	562652	yes	14.4949	-1.87079	0.149112	58.3696	-1.06057	0.125639	no	no
arg1	ENSDARG00000057429	570368	no	5.16581	-0.394393	0.932482	5.16762	-0.393603	1
arhgap18	ENSDARG00000074740	100004252	no	59.5844	0.772238	0.52154	61.8507	0.786623	0.493635
ARHGAP22	ENSDARG00000076434	555573	yes	21.3003	-1.42346	0.200752	24.5295	-1.35989	0.126555	no	no
arhgap22	ENSDARG00000021255	562503	yes	9.37454	-1.29029	0.509856	90.5599	-0.677983	0.366019	no	no
arhgap25	ENSDARG00000061784	562468	yes	41.1664	1.29609	0.459206	46.6386	0.547032	0.768618	no	no
arhgap32b	ENSDARG00000074184	569434	yes	53.13	-1.8707	0.0356707	280.228	-2.04249	0.0038944	no	no
arhgap39	ENSDARG00000100007	101884459	yes	2.56929	-3.17783	0.107808	12.8788	-1.77094	0.16754	no	no
arhgap42b	ENSDARG00000010654	569534	yes	11.8966	-0.351594	0.920576	17.0791	-1.13399	0.34134	no	no
arhgap44	ENSDARG00000104549	100333556	yes	7.05847	-1.27649	0.66922	10.2865	-1.27189	0.519216	no	no
arhgef10lb	ENSDARG00000074244	567649	yes	22.2495	-1.59329	0.0521218	23.5478	-1.78883	0.0117123	no	no
arid3a	ENSDARG00000070843	562799	yes	66.394	0.0112722	0.995377	57.7418	0.142763	0.918273	no	no
arl15b	ENSDARG00000057995	560030	yes	16.0753	-0.269925	0.938321	1148.78	1.23167	0.00163324	no	yes
ARMC6	ENSDARG00000103770	555425	yes	40.0266	1.02129	0.67002	169.182	0.97321	0.230371	no	no
arrb1	ENSDARG00000043241	553266	no	30.0382	0.16343	0.943386	30.0367	0.163155	0.932413
arrdc1b	ENSDARG00000079839	570029	yes	4.18185	-0.765299	0.82769	300.104	0.764994	0.249584	no	no
ARSB	ENSDARG00000108788	100538007	no	14.8919	1.35342	0.743049	15.5329	0.776206	1
arsh	ENSDARG00000002299	100332997	yes	26.8186	0.673478	0.752519	56.1769	0.387106	0.77169	no	no
arsib	ENSDARG00000117075	563783	yes	9.00668	-0.448839	0.906367	16.4385	-1.2743	0.28787	no	no
artnb	ENSDARG00000093714	101883396	yes	4.50536	-2.36619	0.221932	16.4268	-1.85459	0.210825	no	no
asb15b	ENSDARG00000045863	568579	no	17.484	0.899497	0.796327	17.4833	0.899512	1
ascc3	ENSDARG00000086678	100332599	no	71.3902	0.101418	0.956837	71.3758	0.0600062	0.968718
asic1c	ENSDARG00000098428	407670	yes	5.80822	-2.27262	0.40645	22.8926	-2.23435	0.053094	no	no
aspscr1	ENSDARG00000105321	550237	yes	246.403	0.69959	0.284133	342.37	0.63297	0.228427	no	no
atad2b	ENSDARG00000060537	100331225	yes	221.406	0.0461297	0.970234	437.734	0.4192	0.542838	no	no
atad3	ENSDARG00000086848	403004	yes	0.322679	-4.65605	0.178608	461.053	0.0570301	0.961305	no	no
atf2	ENSDARG00000023903	100006516	yes	41.3994	1.19513	0.501376	176.867	0.0106365	0.994673	no	no
atg16l2	ENSDARG00000043238	100034627	yes	31.972	0.930128	0.579807	35.5121	0.973346	0.503327	no	no
ATG2A	ENSDARG00000101507	101883461	yes	142.644	0.668164	0.400795	146.509	0.526285	0.501298	no	no
atg4db	ENSDARG00000088145	100329304	no	8.35728	0.368349	0.9391	8.0394	0.546832	1
atmin	ENSDARG00000068601	571606	yes	12.8792	-0.891443	0.689238	43.0904	-1.21701	0.438081	no	no
atp7b	ENSDARG00000058145	556499	yes	15.8041	-0.779722	0.649011	20.3076	-0.779926	0.586269	no	no
atp8b5a	ENSDARG00000062040	100330945	yes	146.503	1.2476	0.1633	260.439	1.65503	0.0107735	no	yes
atrnl1a	ENSDARG00000077188	792417	yes	69.9592	-1.15388	0.0828918	76.0803	-1.23404	0.0466858	no	no
atxn1a	ENSDARG00000061687	557340	yes	152.281	0.25177	0.806203	494.777	0.403405	0.496141	no	no
atxn1l	ENSDARG00000086977	793927	yes	64.902	0.584362	0.710341	106.144	0.112642	0.931431	no	no
atxn3	ENSDARG00000099274	394079	yes	1.28262	-3.53521	0.244217	278.626	0.796287	0.273931	no	no
avpr2aa	ENSDARG00000007436	100007585	yes	0.645358	-3.39592	1	8.3732	-3.11687	0.0210072	no	no
avpr2l	ENSDARG00000076690	100004053	yes	15.1865	1.46656	0.523428	17.7669	0.692987	1	no	no
AXL	ENSDARG00000112045	100330721	yes	9.65785	-0.905	0.673261	20.9742	-0.812263	0.569998	no	no
b3galt1a	ENSDARG00000079700	559521	yes	19.3668	-1.23412	0.280642	40.6026	-1.7531	0.00332459	no	no
b3galt4	ENSDARG00000076218	101886595	yes	0.966013	-3.06499	0.344731	1.60504	-3.61868	1	no	no
B3GAT1	ENSDARG00000113928	100332644	yes	5.13049	-1.62619	0.656424	11.8958	-1.51167	0.475088	no	no
B3GNT10	ENSDARG00000094253	101883349	no	2.24864	-1.00825	1	2.2499	-1.37013	1
b3gnt2l	ENSDARG00000068219	797513	yes	49.7866	0.946055	0.717562	321.836	0.182403	0.892544	no	no
b3gnt3.2	ENSDARG00000054373	100002020	no	3.52721	-1.13714	0.807736	3.21008	-1.27339	1
b3gnt3.3	ENSDARG00000093521	561028	no	7.11235	-0.44662	0.899614	7.11076	-0.398587	1
b3gnt3.4	ENSDARG00000058100	561172	yes	415.538	4.08113	2.53551e-14	1187.33	4.36843	7.91991e-23	yes	yes
b4galnt2.1	ENSDARG00000094579	558078	yes	0	-5.56105	0.0935227	2.56806	-2.91439	1	no	no
bace1	ENSDARG00000101716	403005	yes	5.15618	-0.862566	0.809729	284.963	-0.164464	0.866276	no	no
bada	ENSDARG00000087993	564921	yes	210.625	2.21847	0.00800344	1164.23	1.39488	0.016782	yes	yes
baiap2l2b	ENSDARG00000060933	564798	yes	27.8172	0.0373871	0.992891	28.4606	-0.382687	0.888318	no	no
bard1	ENSDARG00000076733	100147913	yes	29.3374	0.164798	0.934999	47.3864	-0.489402	0.651662	no	no
barx2	ENSDARG00000041098	100002200	yes	13.6012	0.488652	0.908249	26.156	-0.0523758	0.978282	no	no
baz1a	ENSDARG00000099745	334173	yes	2616.55	0.638878	0.263192	2622.42	0.637968	0.228109	no	no
baz1b	ENSDARG00000102832	571727	yes	630.392	-0.109546	0.925701	2072.29	-0.103308	0.902341	no	no
bbx	ENSDARG00000012699	100005540	yes	829.182	1.00602	0.104008	876.164	0.979183	0.0857063	no	no
bcar3	ENSDARG00000016981	570610	yes	109.212	0.728501	0.423615	829.608	1.46515	0.000274586	no	yes
bcl11ab	ENSDARG00000063153	566491	yes	21.2577	-2.19722	0.0120301	213.576	-2.42993	0.0073736	no	no
bcl2l11	ENSDARG00000079144	100190951	no	17.7302	0.45642	0.858302	7.41456	0.519764	1
bdkrb1	ENSDARG00000020744	368199	no	0.323867	-4.54577	0.221932	0.323871	-4.546	1
best1	ENSDARG00000078331	560608	yes	10.6261	-0.282928	0.942537	42.2017	0.505686	0.720164	no	no
best2	ENSDARG00000079163	567214	yes	3.2351	-1.58422	0.623729	13.892	-0.840679	0.630585	no	no
best4	ENSDARG00000078455	563711	yes	2.25673	-1.00535	1	30.3275	-0.000993269	0.999792	no	no
bicc1b	ENSDARG00000070497	571411	yes	23.247	-2.36155	0.0329255	158.959	-2.71499	4.20985e-07	no	no
bicd1a	ENSDARG00000079496	556758	yes	16.1405	-0.0016764	0.999827	33.2694	-0.617308	0.691785	no	no
BICD2	ENSDARG00000098215	100330881	yes	121.772	0.928618	0.366157	1719.03	0.515243	0.236202	no	no
bin1a	ENSDARG00000042114	563561	yes	10.9428	-1.12758	0.656438	92.594	-0.93933	0.480408	no	no
bmf1	ENSDARG00000090234	571949	no	10.6583	3.45601	0.290028	10.6605	3.45578	1
bmp10	ENSDARG00000061769	562533	yes	21.9435	0.0192389	0.994332	29.6569	0.33058	0.836962	no	no
bmp3	ENSDARG00000060526	777717	yes	108.185	-0.281309	0.832386	965.518	-0.161483	0.820698	no	no
bmper	ENSDARG00000101980	338246	yes	17.7701	-1.60322	0.278545	85.4912	-2.09747	0.000605184	no	no
bnip3	ENSDARG00000099961	336116	yes	9.38976	0.859664	0.845586	29.4047	0.601647	0.724136	no	no
bod1l1	ENSDARG00000089505	100332682	yes	162.558	0.253515	0.82826	243.864	0.368052	0.630809	no	no
brinp2	ENSDARG00000014302	561009	yes	44.0593	-1.46719	0.170472	73.6193	-1.90835	0.066417	no	no
brwd3	ENSDARG00000035540	553209	yes	56.6882	-0.952872	0.216475	841.313	-0.110291	0.88423	no	no
bspry	ENSDARG00000104875	559377	yes	31.0212	0.519682	0.800288	39.7572	0.189498	0.918564	no	no
btbd11b	ENSDARG00000063040	100034519	yes	31.6788	0.405213	0.888751	48.7696	-0.384	0.784546	no	no
btbd17b	ENSDARG00000102472	563672	yes	7.09295	-1.06698	0.713637	10.3338	-1.34109	0.484958	no	no
btbd2b	ENSDARG00000104653	555499	yes	29.3294	-0.00308539	0.999827	48.0401	0.396274	0.738424	no	no
btbd3b	ENSDARG00000087517	562593	yes	17.7537	0.0239188	0.994332	36.1012	-0.30385	0.855618	no	no
btr01	ENSDARG00000051965	563047	yes	11.6485	-0.936568	0.735409	11.6464	-0.957576	0.700413	no	no
btr21	ENSDARG00000058329	101885574	yes	12.9214	-0.202931	0.961119	6.12614	-1.18153	1	no	no
btr23	ENSDARG00000099509	100334710	yes	9.32127	0.0421741	0.993108	19.9896	0.144831	0.939243	no	no
btr24	ENSDARG00000105283	100536410	yes	2.24459	-1.01251	1	2.88907	-0.426093	1	no	no
btr30	ENSDARG00000102591	393394	yes	8.74202	-1.07798	0.794569	0	-5.91026	1	no	no
btr31	ENSDARG00000096304	555877	yes	22.4783	1.12123	0.699638	19.2846	1.50711	1	no	no
BX000701.1	ENSDARG00000099172	101882267	yes	3.22666	-1.68113	0.516674	9.6644	-0.770845	1	no	no
BX005448.1	ENSDARG00000100502	563697	yes				17.3856	-0.991646	0.663092	no	no
BX072576.1	ENSDARG00000078204	101885642	yes	10.9023	-0.730797	0.859368	20.9156	-0.459355	0.82838	no	no
BX088587.1	ENSDARG00000104695	101882633	yes	8.70362	-1.4771	0.302824	19.0294	-0.901408	0.492429	no	no
BX248108.1	ENSDARG00000114306	560089	yes	8.33907	-0.66527	0.863191	15.7651	-0.222744	0.927431	no	no
BX248122.1	ENSDARG00000112449	103910472	yes	27.2942	-0.0751564	0.985713	32.7883	-0.076326	0.979409	no	no
BX284638.1	ENSDARG00000116871	568650	yes	1040.12	0.345853	0.662119	2763.55	0.293183	0.658426	no	no
BX322587.1	ENSDARG00000089636	100002141	no	7.05442	1.86242	0.71675	7.06217	2.12731	1
BX323022.1	ENSDARG00000116593	101882881	yes	2.58143	-2.93179	0.281577	0.967286	-4.03333	1	no	no
BX323882.1	ENSDARG00000101656	563995	yes							no	no
BX324132.4	ENSDARG00000114278	568680	yes	1.93607	-2.90959	0.310842	3.22429	1.31411	1	no	no
BX324188.1	ENSDARG00000075970	101886918	yes	14.2466	-0.0623287	0.990508	14.246	-0.21093	1	no	no
BX470259.1	ENSDARG00000111506	101886309		5.16524	-0.95574	0.802248				no	no
BX510342.1	ENSDARG00000099759	100001444	yes							no	no
BX510922.3	ENSDARG00000113380	108180795	yes	1.60328	-2.44256	0.50473	10.0156	-0.802117	1	no	no
BX511013.1	ENSDARG00000112403	103908633	yes	92.1846	2.42986	0.101338	138.412	1.8985	0.163106	no	no
BX511021.1	ENSDARG00000073936	100006428	yes	111.445	-1.92807	0.00817491	51.3144	-3.37196	8.24892e-09	no	no
BX530018.1	ENSDARG00000037576	567498	yes	0	-5.94889	0.0514596	10.04	-0.771651	1	no	no
BX537137.1	ENSDARG00000092436	100148466	yes	0	-4.0352	1	107.72	0.377695	0.689813	no	no
BX539310.1	ENSDARG00000116510	110439423	yes	48.7144	8.09498	0.302251	347.441	-0.291347	0.72012	no	no
BX539336.1	ENSDARG00000100606	100331456	yes	45.812	1.42036	0.333147	2558.64	2.08664	8.72518e-07	no	yes
BX569798.1	ENSDARG00000037619	797518	yes	1.61577	-2.68	0.363979	10.6359	-0.891215	1	no	no
BX601644.1	ENSDARG00000090632	100294510	yes				0	-4.7722	1	no	no
BX649490.4	ENSDARG00000111856	101886973	yes	14.2184	-0.687424	0.78549	13.889	-0.478925	0.843169	no	no
BX649556.2	ENSDARG00000115416	101883274	yes	19.0844	-0.420013	0.894867	27.1391	0.557944	0.834798	no	no
BX649608.2	ENSDARG00000115608	101883865	yes	4.48918	-0.199778	0.97547	21.9328	-0.43648	0.779039	no	no
BX769173.3	ENSDARG00000114992	567166	yes	4.19078	-1.25883	0.775284	4.51116	-1.36794	1	no	no
BX855614.1	ENSDARG00000094551	555910	yes	40.3362	0.169151	0.933497	41.9422	0.125251	0.944392	no	no
BX901889.1	ENSDARG00000077036	100331689	no
BX901922.1	ENSDARG00000057886	108191960	yes				3.22429	-0.386003	1	no	no
BX908782.1	ENSDARG00000100184	103910141	yes	0.961967	-2.50515	1	33.5907	-0.38338	0.838228	no	no
BX908782.3	ENSDARG00000116628	100329375	yes	76.177	-0.690726	0.76938	255.255	-0.906287	0.557321	no	no
BX927362.2	ENSDARG00000112918	101882029	no	69.0112	-0.720956	0.451895	38.3122	-0.912012	0.614261
BX957322.1	ENSDARG00000089562	100006797	yes	7.42672	-1.18004	0.663182	10.646	-1.40309	0.493338	no	no
C14orf28	ENSDARG00000102021	100333462	yes	0.96399	-2.8824	1	1.60646	-3.32946	1	no	no
C1orf232	ENSDARG00000103312	101883133	yes	0	-3.86526	1	0	-6.1076	1	no	no
c1ql2	ENSDARG00000015592	100005110	yes	59.194	1.36776	0.289147	65.6542	1.15894	0.36234	no	no
c1ql3a	ENSDARG00000010350	100151368	yes	19.6351	-0.280884	0.908331	58.0713	0.491557	0.67045	no	no
c1ql3b	ENSDARG00000028521	556064	yes				4.18595	-2.30559	1	no	no
c1ql4a	ENSDARG00000011549	559288	yes	4.84278	-2.16071	0.198001	41.5953	-1.59675	0.100405	no	no
c2cd2	ENSDARG00000105000	100332559	yes	30.943	-0.325677	0.853175	597.964	0.218218	0.727916	no	no
c3a.4	ENSDARG00000093198	100331428	yes	9.95651	-0.755317	0.813209	21.2565	-0.0482282	0.982173	no	no
C3AR1	ENSDARG00000031749	794255	yes	1.93405	-2.6668	0.313197	1.93315	-2.97448	1	no	no
c5	ENSDARG00000021004	565774	yes	22.5082	-0.460424	0.828031	28.9635	-0.198202	0.911274	no	no
ca2	ENSDARG00000014488	387526	yes	128.616	0.806799	0.380083	1306.8	0.704424	0.33533	no	no
cabin1	ENSDARG00000079326	571383	yes	180.914	0.361688	0.64893	337.466	0.41111	0.541738	no	no
cabp7b	ENSDARG00000060846	556082	yes	2.24459	-3.1547	0.208106	38.0344	-2.69402	0.00143075	no	no
CABZ01003344.1	ENSDARG00000102600	108182686	yes	1.29072	-2.52987	0.645523	0	-6.07413	1	no	no
CABZ01003476.1	ENSDARG00000103345	110438068	yes	11.0115	3.50689	0.403937	12.9462	-0.0334821	1	no	no
CABZ01013771.1	ENSDARG00000101415	110438486	yes	6.41311	-0.54558	0.932433	8.66721	-0.29697	1	no	no
CABZ01018874.1	ENSDARG00000105677	100535375	no
CABZ01021532.1	ENSDARG00000115887	108179086	yes							no	no
CABZ01021599.1	ENSDARG00000112870	110437957	yes	9.3397	-0.790298	0.706602	67.3257	0.227612	0.8688	no	no
CABZ01022564.1	ENSDARG00000115384	108179082	yes							no	no
CABZ01024856.1	ENSDARG00000104013	100537431	yes							no	no
CABZ01029822.1	ENSDARG00000086931	100004582	yes	71.9003	-1.01329	0.261874	658.196	-1.21854	0.00626169	no	no
CABZ01034596.1	ENSDARG00000117160	100537502	yes							no	no
CABZ01035279.1	ENSDARG00000116774	110437793	yes	19.56	3.33559	0.48786	286.874	0.185634	0.836368	no	no
CABZ01035356.1	ENSDARG00000114210	110438478	no	26.9897	0.954602	0.806529	21.8743	0.948051	0.792194
CABZ01037298.1	ENSDARG00000102015	100537556	yes	8.04269	-1.5332	0.539577	72.3465	-1.36277	0.210793	no	no
CABZ01038494.1	ENSDARG00000088258	100535551	yes	8.34918	0.69006	0.871754	784.744	0.895636	0.0398412	no	no
CABZ01039782.1	ENSDARG00000093286	566743	yes	4.17257	-3.04741	0.0938414	18.3646	-1.99679	0.0262412	no	no
CABZ01041494.1	ENSDARG00000040319	100000959	yes	9.98114	-0.138467	0.969633	13.2084	-1.03717	0.47409	no	no
CABZ01041495.1	ENSDARG00000105882	100000094	yes	2.90921	-2.22483	0.476014	55.6882	-2.59418	0.00969065	no	no
CABZ01041604.1	ENSDARG00000059854	797048	yes	1.60328	-2.49429	0.482735	26.8139	-0.483283	0.787627	no	no
CABZ01043952.1	ENSDARG00000110954	562793	yes	41.9664	1.5332	0.527039	350.803	1.97227	0.00330542	no	yes
CABZ01043955.1	ENSDARG00000087867	101882338	yes	17.0986	0.724228	0.751881	32.8612	-1.38724	0.104871	no	no
CABZ01044048.1	ENSDARG00000011463	100004411	yes	7.44893	-0.11852	0.985588	4.85234	-1.04735	1	no	no
CABZ01044053.1	ENSDARG00000087950	100329390	yes	250.852	-0.316826	0.813977	1230.89	0.332306	0.506675	no	no
CABZ01045212.1	ENSDARG00000087525	564731	yes	17.7368	0.567557	0.813222	27.3798	0.472458	0.81589	no	no
CABZ01050105.2	ENSDARG00000111916	103910016	no	22.4459	-0.204355	0.966318	4.81512	-2.33197	1
CABZ01050249.1	ENSDARG00000099376	100333521	yes	24.2128	1.58355	0.321257	32.6091	1.56921	0.271	no	no
CABZ01050398.1	ENSDARG00000102655	100536144	yes							no	no
CABZ01050944.1	ENSDARG00000105972	100535636	yes	9.34066	-1.21308	0.593327	39.6625	-0.443778	0.695214	no	no
CABZ01051600.2	ENSDARG00000110394	100148750	yes							no	no
CABZ01053221.1	ENSDARG00000058774	101883597	yes	1.61933	-3.03268	0.30393	5.16607	-1.58546	1	no	no
CABZ01054394.1	ENSDARG00000090942	101885996	yes	18.381	-0.126636	0.969836	33.212	-0.52649	0.738424	no	no
CABZ01055347.1	ENSDARG00000061660	100333227	yes	28.6403	-0.585535	0.751435	82.443	-0.429395	0.719743	no	no
CABZ01057928.1	ENSDARG00000115082	101882228	no	26.8248	1.79074	0.297829	27.139	1.22169	0.493784
CABZ01058046.1	ENSDARG00000113768	101885783	yes	17.6833	-0.00565255	0.999827	13.1812	-0.430452	1	no	no
CABZ01058261.1	ENSDARG00000099194	572121	yes	956.489	0.464446	0.491824	1268.49	0.595019	0.276776	no	no
CABZ01059099.1	ENSDARG00000067927	101882949	yes	6.15347	1.07946	0.864313	31.9857	0.439909	0.798776	no	no
CABZ01059627.2	ENSDARG00000079681	100332822	yes	2.91159	-2.07586	0.46582	4.53133	-2.49458	1	no	no
CABZ01059912.1	ENSDARG00000101453	108182725	no
CABZ01060030.1	ENSDARG00000106579	100331257	yes	7.10844	-1.2927	0.630121	34.1953	-1.17229	0.215742	no	no
CABZ01060891.1	ENSDARG00000067815	100151059	yes	58.6558	0.608826	0.636638	69.2906	0.678046	0.527943	no	no
CABZ01061894.1	ENSDARG00000116712	100006548	yes	451.089	0.46747	0.521355	1776.27	0.486587	0.304493	no	no
CABZ01063543.1	ENSDARG00000113045	100537771	no	0.322679	-4.7559	0.115293	7.41017	-1.62896	1
CABZ01064472.1	ENSDARG00000067801	100333323	no	26.5347	0.092446	0.978286	16.1677	-0.398713	0.857592
CABZ01065328.1	ENSDARG00000090310	100329398	no				4.53419	0.487121	1
CABZ01066719.1	ENSDARG00000099731	100536030	yes	2.89602	-1.1559	0.766533	4.83079	-1.48871	1	no	no
CABZ01066725.1	ENSDARG00000100700	100329948	yes	17.753	1.1959	0.57532	79.4224	1.54939	0.0799816	no	no
CABZ01066926.1	ENSDARG00000099534	100329344	yes	16.0814	-0.146659	0.967442	408.733	0.423793	0.471171	no	no
CABZ01067175.1	ENSDARG00000100401	100008066	yes	8.09429	-0.310402	0.949956	29.4694	0.865806	1	no	no
CABZ01067232.1	ENSDARG00000057408	101886389	yes	7.72406	-2.01946	0.332846	23.8029	-2.57223	0.0898727	no	no
CABZ01067557.1	ENSDARG00000114697	100536316	yes	5.15477	0.187297	0.973688	8.05365	-1.40631	1	no	no
CABZ01067558.1	ENSDARG00000099598	110437809	yes	3.2351	-0.849578	0.873121	6.76973	-1.30855	1	no	no
CABZ01067973.1	ENSDARG00000090398	100536162	yes	17.1117	0.0826653	0.978163	18.0693	-0.638067	0.683753	no	no
CABZ01068356.1	ENSDARG00000076702	101886286	yes	7.44251	0.131693	0.980935	18.7155	-1.00107	0.428237	no	no
CABZ01068469.1	ENSDARG00000111388	569006	no	4.84493	-0.41418	0.928435	3.54671	-1.00184	1
CABZ01068499.1	ENSDARG00000103034	100536500	yes	33.1165	-2.72512	0.350322	64.6648	-2.59079	0.0136043	no	no
CABZ01070469.1	ENSDARG00000113254	100002384	yes	6.11946	-1.18206	0.576068	14.4895	-0.720455	0.700136	no	no
CABZ01071061.1	ENSDARG00000114841	100329789	yes	0.647733	-2.45949	1	74.2523	-0.364536	0.762013	no	no
CABZ01072083.2	ENSDARG00000114742	570815	yes	65.1551	-0.874354	0.212144	107.109	-0.631226	0.34119	no	no
CABZ01072254.1	ENSDARG00000076111	100333154	no	8.03662	-0.822792	0.791445	6.74969	-0.936763	1
CABZ01072312.1	ENSDARG00000104926	100333524	yes							no	no
CABZ01072885.1	ENSDARG00000104259	101885743	yes				7.09214	-2.39883	0.0714076	no	no
CABZ01072989.1	ENSDARG00000091638	100535282	yes	0	-4.56534	1	0.644857	-4.13173	1	no	no
CABZ01073265.1	ENSDARG00000099425	557557	yes	120.233	-0.913327	0.555449	178.677	-0.883224	0.416531	no	no
CABZ01074203.1	ENSDARG00000103892	100332902	yes	3.21869	-1.89235	0.478546	17.413	-0.905429	0.456834	no	no
CABZ01074745.1	ENSDARG00000102748	110438480	yes	774.865	0.341546	0.692838	1332.97	0.857049	0.178393	no	no
CABZ01074994.1	ENSDARG00000038226	100331467	yes				9.70754	0.384822	1	no	no
CABZ01075572.1	ENSDARG00000105924	100535087	no	4.83196	-1.58865	0.43806	4.83369	-1.62028	1
cabz01076234.2	ENSDARG00000067794	100332077	yes	24.1764	-0.448899	0.855237	16.1374	-0.335678	0.887252	no	no
CABZ01076667.1	ENSDARG00000099226	571753	yes	34.3567	-0.114584	0.976134	476.446	0.701436	0.245229	no	no
CABZ01078261.1	ENSDARG00000109287	100317353	yes	22.5356	0.169633	0.945685	338.307	0.288031	0.739865	no	no
CABZ01078737.1	ENSDARG00000100461	101882195	yes	179.006	0.867331	0.177707	328.081	0.894085	0.0915716	no	no
CABZ01079005.1	ENSDARG00000105086	101884228	yes	0.961967	-3.46709	0.242366	0.963023	-3.50928	1	no	no
CABZ01079192.1	ENSDARG00000101629	100148922	yes	10.326	-0.806668	0.739399	45.4279	-1.20849	0.351311	no	no
CABZ01079241.1	ENSDARG00000098424	563292	yes	83.2586	0.662229	0.502109	107.086	0.329259	0.699433	no	no
CABZ01080371.2	ENSDARG00000112681	792477	yes	9.31115	-0.361497	0.92941	91.3615	0.0206598	0.991471	no	no
CABZ01081752.3	ENSDARG00000103244	557537	yes	11.9093	-0.352273	0.901505	28.641	-0.43676	0.785879	no	no
CABZ01081780.1	ENSDARG00000063158	100332770	yes	108.87	-0.760983	0.370315	99.2118	-0.79785	0.380497	no	no
CABZ01081909.1	ENSDARG00000102725	103909961	yes	32.108	0.0059891	0.999827	57.5759	0.279421	0.881179	no	no
CABZ01083937.1	ENSDARG00000074320	100334158	yes				12.5793	-0.717775	0.679653	no	no
CABZ01084347.1	ENSDARG00000101969	101886159	yes	2.25827	-1.71772	0.538271	16.8183	0.3805	1	no	no
CABZ01084564.1	ENSDARG00000045137	100331077	yes	5.48589	-1.04492	0.740929	9.02946	-1.38532	0.537644	no	no
CABZ01084566.1	ENSDARG00000053746	100331149	yes	18.0932	-1.84534	0.198348	36.4324	-2.30327	0.00266773	no	no
CABZ01085658.1	ENSDARG00000090544	110438156	yes	1.60851	-2.894	0.213516	15.1487	-0.956091	0.474298	no	no
CABZ01085878.1	ENSDARG00000104869	100332622	no	13.2268	0.601092	0.825624	12.9076	0.413898	1
CABZ01086041.1	ENSDARG00000019442	101884950	yes	17.0817	-0.815473	0.772136	29.9721	-0.759006	0.538538	no	no
CABZ01086734.1	ENSDARG00000099541	100006170	yes	12.5611	-1.1449	0.456248	12.5507	-0.966977	0.57735	no	no
CABZ01087514.1	ENSDARG00000090861	566378	yes	6.1291	-0.145073	0.969829	187.171	-0.146244	0.888292	no	no
CABZ01088149.1	ENSDARG00000114019	402879	yes	6.78123	0.143559	0.973828	117.183	0.76287	0.456904	no	no
CABZ01088271.1	ENSDARG00000101800	101884223	yes	27.0039	0.683001	0.828897	124.019	0.625788	0.677777	no	no
CABZ01088428.1	ENSDARG00000067784	101885761	yes	42.949	0.769654	0.638943	218.509	0.959573	0.266819	no	no
CABZ01090373.1	ENSDARG00000103011	110438074	yes	5.1487	-1.13294	0.713637	282.884	0.728732	0.236098	no	no
CABZ01092907.1	ENSDARG00000110727	798583	no	12.9026	0.233233	0.935661	18.4076	0.703978	1
CABZ01102038.1	ENSDARG00000116210	100333627	yes				8.0323	-1.90391	0.360442	no	no
CABZ01111496.1	ENSDARG00000003041	100334245	yes	43.159	0.305829	0.867009	54.4099	0.10996	0.947931	no	no
CABZ01112049.1	ENSDARG00000098538	100332723	yes	11.9117	0.0349881	0.992078	19.9425	0.738757	0.727772	no	no
CABZ01112732.1	ENSDARG00000068453	100329480	yes	27.7731	-0.341567	0.84713	9.37353	0.000753121	1	no	no
cacna1aa	ENSDARG00000037905	562059	yes	65.5699	-1.46411	0.175633	655.852	-1.50385	0.0500812	no	no
cacna1ba	ENSDARG00000021735	555941	yes	41.3724	-0.806609	0.592672	101.269	-2.14529	8.28531e-05	no	no
cacna1bb	ENSDARG00000079295	562796	yes	122.041	0.741106	0.537117	153.657	0.484001	0.688414	no	no
cacna1ea	ENSDARG00000062346	564274	yes	29.0446	-1.58635	0.0659698	36.7562	-1.60468	0.0329588	no	no
cacna1g	ENSDARG00000089913	563904	yes	61.5754	-1.5316	0.0206643	139.906	-2.03797	2.1046e-05	no	no
cacna1hb	ENSDARG00000099708	100007317	yes	37.1313	0.0234923	0.99257	39.0706	-0.191627	0.909931	no	no
CACNA2D1	ENSDARG00000073752	101882457	yes	6.4494	-2.9654	0.00269484	13.2055	-2.3256	0.0164844	no	no
cacna2d1a	ENSDARG00000014804	561434	yes	74.5424	1.31019	0.241816	392.162	0.992782	0.103575	no	no
CACNA2D3	ENSDARG00000106018	100535196	yes	17.4343	1.43065	0.499994	18.6812	0.682072	1	no	no
cacna2d4a	ENSDARG00000026855	568225	yes				24.1756	-1.46933	0.174244	no	no
cacnb3b	ENSDARG00000076030	559015	yes	12.9195	0.192669	0.94844	101.721	0.316385	0.803156	no	no
cacng3a	ENSDARG00000058460	567438	yes	43.3042	0.916501	0.600244	23.2265	1.30881	0.497904	no	no
cacul1	ENSDARG00000021885	100538081	yes	142.32	1.14815	0.26478	199.07	0.902876	0.277901	no	no
cadm1a	ENSDARG00000031075	569931	yes	9.99614	-0.218998	0.954641	400.562	-1.93262	0.0418203	no	no
cadm2a	ENSDARG00000009930	793954	yes	26.6551	-1.49818	0.327934	518.847	-1.90486	0.00319748	no	no
caiap	ENSDARG00000092758	557416	no	37.7856	0.426292	0.814718	37.7881	0.426457	0.790672
calcrlb	ENSDARG00000011571	567131	yes	121.417	3.60014	2.6162e-05	301.772	3.71748	1.45e-08	yes	yes
CALHM2	ENSDARG00000074179	569873	yes	3.54947	-1.1249	0.820112	3.54671	-1.29706	1	no	no
calhm3	ENSDARG00000079602	100005130	yes	11.8926	-1.02356	0.699577	21.5473	-1.20401	0.560875	no	no
caln2	ENSDARG00000069766	100007635	yes	3.22476	-1.53673	0.656495	52.0267	-0.549321	0.718037	no	no
CAMSAP3	ENSDARG00000091359	100007608	yes	32.5157	-0.660544	0.696392	60.5337	-1.2761	0.162199	no	no
camsap3	ENSDARG00000059475	556256	yes	68.9961	-0.636701	0.479399	362.702	-0.166637	0.809923	no	no
capn15	ENSDARG00000060600	100330198	yes	73.4777	-0.230538	0.887724	86.0611	-0.393539	0.723506	no	no
capn1b	ENSDARG00000052748	565106	yes	16.0388	-2.09334	0.29056	47.549	-2.1272	0.108891	no	no
capn5b	ENSDARG00000069748	100006332	yes	18.0988	-0.148311	0.96656	18.1024	-0.794621	0.732116	no	no
capzb	ENSDARG00000100252	335083	yes	174.967	0.0885025	0.973828	3124.05	1.13273	0.0038265	no	yes
car15	ENSDARG00000060829	568143	yes	1.29072	-3.42403	0.265164	9.66575	-1.60178	0.469128	no	no
carmil1	ENSDARG00000103887	101883470	no
casc1	ENSDARG00000016815	566485	yes	17.4408	-0.637283	0.780077	19.6827	-1.02437	0.459531	no	no
casp8l2	ENSDARG00000070272	557302	yes	14.8616	0.478017	0.85788	20.9526	0.626252	0.719453	no	no
casz1	ENSDARG00000037030	559053	yes	70.8945	-1.18575	0.139213	693.549	-0.906051	0.0738235	no	no
cbarpb	ENSDARG00000071325	557421	yes	44.2678	-0.13096	0.952749	73.2614	-0.257096	0.830656	no	no
cbfa2t3	ENSDARG00000079012	563252	yes	157.541	-0.570485	0.509409	805.28	-1.03822	0.124044	no	no
cbln2a	ENSDARG00000074601	556853	yes	3.20656	-0.597164	1	3.21008	-0.688563	1	no	no
cbln5	ENSDARG00000053802	100007371	yes	2.8859	-0.924179	1	15.1904	0.803437	1	no	no
CC2D1A	ENSDARG00000036281	100001297	yes	26.4716	-0.134681	0.947519	54.8439	0.43079	0.727772	no	no
ccdc171	ENSDARG00000027381	100330004	no	43.1397	-0.758405	0.505921	12.1983	-0.620066	1
ccdc36	ENSDARG00000097704	559302	yes	8.39818	0.380796	0.928893	29.4062	0.223484	0.906091	no	no
ccdc80	ENSDARG00000000002	368419	no	1610.22	1.68028	0.00940935	1611.36	1.67536	0.00795111
CCKAR	ENSDARG00000052089	569038	yes	6.11673	-0.801434	0.81671	11.9185	-0.285058	1	no	no
CCKBR	ENSDARG00000076824	100331465	yes	4.17864	-1.3509	0.671776	17.423	-1.16724	0.373421	no	no
ccni2	ENSDARG00000033046	100330479	yes	42.8636	-0.250851	0.855219	284.925	0.209176	0.81589	no	no
ccpg1	ENSDARG00000104126	103908643	no	12.2734	1.15857	0.710133	52.3101	1.0168	0.496141
ccr12a	ENSDARG00000038541	563803	yes	9.36244	-0.0512064	0.99215	9.3562	-0.274462	1	no	no
ccr12b.1	ENSDARG00000059410	792585	yes	16.3899	-0.874436	0.757232	20.8954	-0.85436	0.685544	no	no
ccr6a	ENSDARG00000087474	558616	no	23.2058	0.143108	0.955946	23.5351	0.163489	0.939498
ccser1	ENSDARG00000075919	795160	yes	55.4117	0.242629	0.868005	259.62	-0.27371	0.728527	no	no
cd247	ENSDARG00000100284	100101654	no
cd248b	ENSDARG00000077938	100002565	yes	22.9512	-2.89455	0.00929349	48.7582	-3.33504	4.03016e-06	no	no
cd302	ENSDARG00000086100	100333685	yes	35.1099	1.76457	0.178868	1983.49	2.50959	0.000156897	no	yes
cd79a	ENSDARG00000037473	798792	yes	50.0796	1.4949	0.300009	109.107	1.06978	0.296385	no	no
cdc37	ENSDARG00000099301	394013	yes	274.933	1.25842	0.147201	744.779	1.4244	0.0097034	no	yes
cdc42bpaa	ENSDARG00000104283	567912	yes	113.156	0.355202	0.806368	596.379	0.757533	0.123909	no	no
CDCP1	ENSDARG00000110186	560859	yes	31.3065	-0.999509	0.341841	56.1151	-0.771454	0.391117	no	no
cdh10a	ENSDARG00000055843	568370	no	8.67186	-2.7221	0.103855	8.67715	-2.7216	0.101637
cdh12a	ENSDARG00000078226	568508	yes	12.9012	-1.18951	0.445705	12.9002	-1.2054	0.408051	no	no
cdh22	ENSDARG00000098824	100536716	yes	5.80417	-1.76554	0.556969	3.5482	-3.06661	0.029198	no	no
cdh24a	ENSDARG00000075960	567936	yes	18.4313	-0.376471	0.883367	46.5325	-0.135377	0.946051	no	no
cdh24b	ENSDARG00000077996	100007192	yes	19.9514	-0.0763181	0.982757	115.487	-0.834833	0.422509	no	no
cdh7a	ENSDARG00000023542	567704	yes	47.972	-1.11506	0.206247	227.744	-1.18134	0.171059	no	no
CDHR1	ENSDARG00000104756	108191765	yes	5.78192	-1.92782	0.450167	56.3655	-1.64462	0.168579	no	no
cdk14	ENSDARG00000074665	572146	yes	6.43572	-0.931377	0.713637	20.9224	-1.27679	0.400448	no	no
CDK18	ENSDARG00000012204	100150007	yes	18.6462	-0.639611	0.821223	20.2707	-0.992872	0.560927	no	no
cdk19	ENSDARG00000043858	100149670	yes	19.7068	1.75814	0.47089	20.0268	0.906501	1	no	no
CDK2AP1	ENSDARG00000115248	108191561	yes	36.9833	-0.426797	0.838496	250.562	-0.0832704	0.931945	no	no
cdkn2a/b	ENSDARG00000037262	100329528	yes				43.2192	0.419707	0.748585	no	no
cds1	ENSDARG00000019549	100002015	yes	30.0156	-0.216633	0.905279	319.849	-0.718872	0.190614	no	no
celf5b	ENSDARG00000090727	101884815	no	11.2628	-1.58908	0.222713	13.1899	-0.951146	0.600757
celsr2	ENSDARG00000019726	560426	no	98.3291	-0.687755	0.58087	74.2839	-0.631206	0.614152
celsr3	ENSDARG00000055825	100008568	yes	106.468	-0.465625	0.662599	211.562	-0.57645	0.468716	no	no
cep104	ENSDARG00000060361	560451	yes	6.44144	-2.34068	0.193056	6.44005	-2.2056	0.228097	no	no
cep120	ENSDARG00000091326	100334628	yes	113.657	0.106129	0.941906	222.145	0.355252	0.623198	no	no
cep170ab	ENSDARG00000058892	566358	yes	21.909	-1.22107	0.538386	19.6426	-1.06389	0.588435	no	no
cep170b	ENSDARG00000074636	792564	yes	205.637	0.791006	0.303236	205.704	0.79576	0.285842	no	no
cep57	ENSDARG00000067668	791201	yes	14.1513	0.322426	0.941129	186.798	0.216464	0.831202	no	no
cept1a	ENSDARG00000058716	560225	yes	13.1914	-1.14085	0.640236	16.4098	-1.17933	0.580552	no	no
cercam	ENSDARG00000079049	558337	yes	19.967	-1.44256	0.313102	282.237	-0.72868	0.169586	no	no
cerk	ENSDARG00000069169	558496	yes	44.4515	0.417642	0.780916	81.8786	0.557927	0.627407	no	no
cers4b	ENSDARG00000018619	100330155	yes	9.66	-0.489049	0.840352	246.448	-0.711901	0.373865	no	no
cetn4	ENSDARG00000041215	795310	yes	355.245	0.78262	0.23262	620.374	0.845776	0.147832	no	no
cfap36	ENSDARG00000037079	678564	yes	59.5201	-0.491028	0.779118	140.129	-0.154048	0.885959	no	no
cfap410	ENSDARG00000099397	100537391	yes	56.4473	-0.0578137	0.974561	76.1046	0.0420766	0.974683	no	no
cfap57	ENSDARG00000058090	100006472	yes	8.70934	-1.98762	0.154987	9.34914	-1.87188	0.161762	no	no
cfap70	ENSDARG00000058508	564542	yes	30.7483	0.642727	0.834883	32.6864	0.552305	0.841426	no	no
cfap73	ENSDARG00000035550	100001777	yes	7.75032	-0.000304643	0.999827	19.6472	0.535337	0.766685	no	no
cgas	ENSDARG00000021572	557043	yes	102.481	1.59723	0.0430955	148.613	1.74939	0.00306839	yes	yes
ch25hl1.2	ENSDARG00000068138	798384	no	4.85158	-0.677894	0.872556	4.85234	-0.677859	1
ch25hl3	ENSDARG00000093818	100005337	yes				24.5624	0.0984075	0.964075	no	no
chadlb	ENSDARG00000075903	100330176	yes	3.8864	-2.7535	0.298129	5.17621	-2.72775	0.181817	no	no
chd3	ENSDARG00000021405	568230	yes	214.979	-0.258863	0.813972	725.745	-0.350801	0.598184	no	no
chl1b	ENSDARG00000103109	100318566	yes	36.3869	-2.53751	0.000167678	329.896	-2.59405	9.07787e-06	no	no
chmp6a	ENSDARG00000097451	100147988	yes				0.643436	-4.49798	1	no	no
chn2	ENSDARG00000011845	570999	yes	22.4864	-0.126631	0.973251	39.8334	0.391159	0.888318	no	no
chordc1b	ENSDARG00000017067	393310	yes	498.078	0.598299	0.400638	680.286	0.594452	0.359426	no	no
chrm3b	ENSDARG00000071298	100149598	no	3.84787	-2.33115	0.413364	3.85209	-2.32973	1
chrm5b	ENSDARG00000069598	561491	no	11.634	-0.612435	0.814846	11.314	-0.652491	1
chst12b	ENSDARG00000094981	797576	yes	12.5393	-1.55354	0.296529	0	-6.18332	1	no	no
CHST13	ENSDARG00000004018	565671	yes	20.6735	0.41302	0.870442	700.771	0.896335	0.11519	no	no
chst3a	ENSDARG00000061070	559721	yes	5.1783	-0.807135	0.837854	7.75419	-1.1974	1	no	no
cita	ENSDARG00000089856	100329792	yes	103.649	-0.0662697	0.967269	102.996	-0.0666468	0.959519	no	no
citb	ENSDARG00000088825	100333880	yes	7.10641	-1.89934	0.290527	16.4641	-1.77189	0.249175	no	no
ckmt2a	ENSDARG00000069615	327506	yes	291.735	-2.46239	0.00101442	410.635	-2.41893	0.000886769	no	no
clec11a	ENSDARG00000079107	568355	yes	2.25946	-3.7008	0.00862482	11.3183	-1.85699	0.201715	no	no
clec3bb	ENSDARG00000099500	100537161	yes	22.8735	-0.592007	0.759775	58.09	-0.24909	0.83463	no	no
clmn	ENSDARG00000096867	100330495	yes	14.4961	-1.64153	0.191047	20.9324	-2.28496	0.0172991	no	no
cln5	ENSDARG00000076339	569407	yes	20.0486	0.3706	0.888503	21.6534	0.136354	0.952239	no	no
CLPB	ENSDARG00000088463	100331587	yes	12.2352	1.07112	0.694167	76.7656	0.409799	0.672057	no	no
clrn2	ENSDARG00000070321	795807	no	2.57941	-2.67377	0.253147	2.57801	-2.42734	1
cltb	ENSDARG00000052368	100329879	yes	14.8446	0.389729	0.914906	15.1703	1.02806	1	no	no
cltcl1	ENSDARG00000091618	100330183	no	44.8219	-0.258622	0.864151	43.8599	-0.280932	0.83124
cluhb	ENSDARG00000060566	100150676	yes	17.79	-0.502614	0.83921	33.3199	-0.918559	0.578197	no	no
CMKLR1	ENSDARG00000110362	795295	yes				2.57943	-2.61855	1	no	no
CMKLR1	ENSDARG00000109654	795365	yes	11.9521	-0.150981	0.972827	8.72439	-0.20031	1	no	no
cmpk2	ENSDARG00000031359	570478	yes	3.55136	-1.29757	0.642554	5.81818	-1.5859	1	no	no
cnga2b	ENSDARG00000100436	103911065	yes	161.721	0.428207	0.75633	227.962	0.592464	0.546249	no	no
cnga3b	ENSDARG00000012297	100334711	yes	16.1332	-1.98907	0.130112	53.1886	-2.24667	0.00929664	no	no
cngb1a	ENSDARG00000068242	568211	yes	15.2063	-0.226922	0.957353	31.3736	-0.826084	0.727772	no	no
cngb3.2	ENSDARG00000101368	562466	yes	57.744	-2.9071	0.0012633	101.211	-2.93205	0.00028419	no	no
cnksr2a	ENSDARG00000074480	561623	yes	24.2585	-0.735287	0.717918	25.8766	-0.998518	0.551772	no	no
cnn1a	ENSDARG00000017193	567396	no	4.20789	0.114687	1	4.20744	0.114428	1
cnnm4b	ENSDARG00000074309	100150651	yes	42.9451	1.16927	0.608752	84.0441	1.33506	0.32287	no	no
cnot4a	ENSDARG00000007045	569055	yes	86.6944	-0.151043	0.909555	439.948	0.108203	0.88945	no	no
cntn2	ENSDARG00000000472	30726	yes	18.0713	-0.0761903	0.978735	25.802	-0.235803	0.890551	no	no
cntn3a.1	ENSDARG00000062880	569437	yes	47.6753	-0.719936	0.498857	129.68	-0.575078	0.588415	no	no
cntn3a.2	ENSDARG00000013647	100000688	yes	0.968389	-4.73978	0.0059737	1.28976	-5.79001	1.63708e-07	no	no
cntnap1	ENSDARG00000074524	566220	yes	3.87012	-3.32452	0.0584459	6.44005	-2.89234	0.0579721	no	no
cntnap3	ENSDARG00000067824	564195	yes	30.2613	-1.84156	0.0130335	73.0699	-2.40714	0.0005807	no	no
cntnap5a	ENSDARG00000073920	569185	yes	25.7697	-1.3809	0.306072	21.867	-1.35399	0.332023	no	no
cog7	ENSDARG00000061372	768247	yes	18.9875	0.0441495	0.991842	235.841	0.515967	0.463338	no	no
col12a1b	ENSDARG00000019601	562946	yes	314.847	-2.96371	3.16161e-08	660.594	-3.17116	6.90805e-10	no	no
col27a1b	ENSDARG00000099930	560145	yes	71.3085	-1.7037	0.0302088	99.0005	-1.98951	0.00241632	no	no
col28a1b	ENSDARG00000087087	100332225	no	3.54969	-2.15768	0.372885	3.55113	-2.15685	1
col28a2b	ENSDARG00000100781	100002791	yes	5.48624	-1.04288	0.687378	13.2313	-0.102398	1	no	no
col4a2	ENSDARG00000104110	553355	yes	821.763	2.70227	8.58073e-06	9149.92	2.81065	8.48896e-08	yes	yes
col4a3bpb	ENSDARG00000102372	797430	yes	62.9043	0.582991	0.614108	1947.29	0.774212	0.0960775	no	no
col6a3	ENSDARG00000095915	108191316	yes				54.8797	-0.614315	0.624768	no	no
col8a1a	ENSDARG00000077403	557795	yes	15.8496	-0.612612	0.812973	15.8466	-0.612746	0.789792	no	no
colgalt2	ENSDARG00000014670	100003546	no	5.15274	-1.39735	0.645694	5.15175	-1.4312	1
coq2	ENSDARG00000059510	100037331	yes	86.6165	-0.150576	0.918932	118.271	0.100289	0.924159	no	no
corin	ENSDARG00000101281	100320926	yes	8.40782	-0.387222	0.910933	13.5637	-0.364948	1	no	no
coro2bb	ENSDARG00000063604	796974	yes	55.3694	2.51304	0.0481141	65.0245	3.32861	0.0245456	yes	yes
COX7A2	ENSDARG00000110700	100535363	yes	348.933	1.21493	0.0972482	675.428	0.923838	0.211276	no	no
cpeb3	ENSDARG00000060103	100005268	yes	17.3834	-0.572483	0.830275	32.2048	-0.268031	0.871066	no	no
cplx2	ENSDARG00000111920	563082	yes	427.105	-0.624782	0.488927	175.502	-2.65183	0.000218397	no	no
cplx3a	ENSDARG00000099196	100149700	yes				11.3025	1.22352	1	no	no
cplx4b	ENSDARG00000059486	797490	yes				0	-5.31843	1	no	no
cpne5a	ENSDARG00000061466	568003	yes	4.80983	-0.351257	0.951985	34.4379	-0.41305	0.811327	no	no
cpne9	ENSDARG00000098252	101886563	yes	4.53413	-2.12017	0.474371	14.5441	-1.67749	0.242715	no	no
cps1	ENSDARG00000020028	555623	yes	9.99183	-0.721873	0.7342	43.5988	0.0436803	0.980945	no	no
CR318595.1	ENSDARG00000098587	101885013	yes				3.85209	-0.422567	1	no	no
CR352329.1	ENSDARG00000055476	100006839	yes	4.48918	-1.8169	0.587572	14.5097	-0.318017	0.871852	no	no
CR354435.1	ENSDARG00000070297	100334559	yes	22.2517	0.750482	0.671414	158.993	1.35164	0.190354	no	no
CR354612.1	ENSDARG00000114307	795083	yes	0	-5.11189	1	9.39226	5.7202	1	no	no
CR376783.1	ENSDARG00000074235	797620	yes	54.1668	0.914106	0.377274	93.5623	1.30821	0.103334	no	no
CR377211.1	ENSDARG00000079364	103910036	yes	14.2052	0.031492	0.994332	23.2498	-0.726977	0.640425	no	no
CR381531.2	ENSDARG00000104767	101886435	yes	12.5209	-0.395606	0.901337	26.6763	0.101207	0.974016	no	no
CR384085.1	ENSDARG00000068742	100151089	yes	6.13622	-1.53395	0.472571	10.3279	-1.2309	0.417917	no	no
CR385053.3	ENSDARG00000114158	108180207	no	140.747	-1.01764	0.152701	127.548	-0.222793	0.857156
CR387919.1	ENSDARG00000100518	559690	yes	44.5881	0.804362	0.610741	45.2342	0.753925	0.603702	no	no
CR388166.1	ENSDARG00000087753	100534657	yes	17.1226	0.515968	0.861112	32.2322	-0.00463562	0.999151	no	no
CR391944.1	ENSDARG00000098142	108179097	yes							no	no
CR392045.1	ENSDARG00000113064	565691	yes	3.22595	-2.78913	0.127571	6.11338	-3.15752	0.00581727	no	no
CR394535.1	ENSDARG00000103193	100536643	yes	13.8466	-1.31982	0.330083	4.81796	-1.8562	1	no	no
CR450764.1	ENSDARG00000100754	100004392	yes							no	no
CR450764.6	ENSDARG00000115184	108191592	yes				2.57943	-1.39721	1	no	no
CR450764.8	ENSDARG00000116389	103908740	yes							no	no
CR450805.1	ENSDARG00000114843	797120	yes	30.4296	0.626873	0.834415	8.09677	-0.208478	1	no	no
CR450824.2	ENSDARG00000103927	101885864	yes				5.78808	-1.12161	1	no	no
CR631122.1	ENSDARG00000044534	100149591	yes	8.01639	-0.0663569	0.991742	14.8134	0.0584522	1	no	no
CR749762.1	ENSDARG00000037526	101885849	no	3.86405	-1.58965	0.58166	3.86346	-1.58989	1
CR759791.1	ENSDARG00000088591	100537407	yes							no	no
CR762436.2	ENSDARG00000112967	100329422	yes	25.1259	0.790265	0.667033	28.3542	0.390564	0.809129	no	no
CR846087.3	ENSDARG00000095605	100535113	yes	2.56524	-1.18273	0.849936	3.53535	-2.00771	1	no	no
CR847523.1	ENSDARG00000108118	101882637	yes	5.15881	-0.463992	0.922726	7.41738	-0.338499	1	no	no
CR847534.1	ENSDARG00000099292	793338	yes				116.521	-0.696491	0.341665	no	no
CR847537.1	ENSDARG00000110874	796777	yes	13.5518	-1.01989	0.546496	71.6958	-1.8671	0.075136	no	no
CR847803.1	ENSDARG00000077589	103909690	yes	2.90446	-2.53164	0.183035	9.99976	-1.88102	0.0999518	no	no
CR847850.1	ENSDARG00000102411	100534733	yes	19.4288	3.10323	0.38714	22.9071	-0.242942	0.895139	no	no
CR847936.1	ENSDARG00000039063	100330143	yes	36.926	-0.696085	0.797602	308.771	0.515712	0.432238	no	no
CR847944.1	ENSDARG00000026246	571410	yes				0	-4.66988	1	no	no
CR847944.2	ENSDARG00000059899	108179103	yes	9.38738	0.219701	0.962177	12.6252	0.00312054	1	no	no
CR854980.1	ENSDARG00000103123	101885998	yes	5.8076	-2.87689	0.00813638	16.427	-2.17697	0.0135887	no	no
CR855996.2	ENSDARG00000104450	563450	yes	10.3126	-1.00247	0.57861	16.7251	-0.857209	0.727147	no	no
CR925773.1	ENSDARG00000086266	798445	yes				6.10625	-1.82458	1	no	no
CR936977.2	ENSDARG00000103638	793240	yes	80.9671	1.38349	0.240712	148.175	1.7319	0.0639795	no	no
cradd	ENSDARG00000028192	450046	yes	88.1239	1.3386	0.126687	100.661	0.92788	0.240663	no	no
creb1b	ENSDARG00000093420	550516	yes	373.454	-0.647186	0.315676	1159.24	-0.589106	0.200978	no	no
creb5a	ENSDARG00000099002	101886947	yes	230.827	1.38229	0.208087	274.22	1.03235	0.251196	no	no
crebrf	ENSDARG00000105114	100149876	yes	56.986	-0.0925788	0.961875	394.92	0.772505	0.223235	no	no
creld1b	ENSDARG00000006990	569741	yes	22.1686	-0.455136	0.859048	406.041	-0.365298	0.762596	no	no
crhr2	ENSDARG00000103704	100002312	yes				141.416	0.181742	0.854807	no	no
CRHR2	ENSDARG00000062377	100335005	yes	0	-5.61592	0.0877874	1.93315	-3.50649	1	no	no
crispld2	ENSDARG00000088595	100535149	yes	1.60328	-2.77478	0.408862	2.57232	-3.09286	1	no	no
crp1	ENSDARG00000071454	570508	yes	2.90411	-1.63671	0.689156	3.86914	-1.32292	1	no	no
crp6	ENSDARG00000071457	797437	yes							no	no
crtc3	ENSDARG00000052114	570024	yes	35.464	-0.0163896	0.99419	389.484	0.186606	0.806961	no	no
crygm4	ENSDARG00000008219	338225	yes	28.1282	2.44149	0.422904	28.4548	2.0659	0.490559	no	no
CSDC2	ENSDARG00000100167	557375	yes	2.89232	-1.36219	0.736011	30.249	-1.30167	0.227616	no	no
csf1rb	ENSDARG00000053624	568405	yes	122.075	2.54128	0.00452632	131.415	2.27709	0.00429565	yes	yes
csf3r	ENSDARG00000045959	100134935	yes	14.821	-0.746066	0.792902	29.3817	0.167838	0.924211	no	no
csgalnact1a	ENSDARG00000040535	793671	yes	22.2767	0.522036	0.805552	231.905	1.27453	0.0197249	no	yes
csgalnact1b	ENSDARG00000089233	101886904	yes	6.74995	-2.34075	0.168717	14.4752	-2.20583	0.143491	no	no
csnk2a4	ENSDARG00000091702	100535532	yes	12.278	0.547232	0.883514	31.9485	-0.43651	0.762553	no	no
CSRNP3	ENSDARG00000079741	100332048	yes	13.2179	-1.77486	0.133701	9.65296	-2.18679	0.190942	no	no
cst14b.1	ENSDARG00000117133	768128	yes	30.2548	1.30139	0.544491	519.139	0.963115	0.0457081	no	no
CT025887.1	ENSDARG00000114574	110440185	yes	49.8351	0.173842	0.95908	112.4	0.756294	0.469165	no	no
CT027609.1	ENSDARG00000105058	108183899	yes				2.24705	-2.81201	1	no	no
CT030712.1	ENSDARG00000044355	100534830	yes	0	-5.71883	0.0794473	12.9261	-1.39148	0.34617	no	no
CT573263.1	ENSDARG00000112940	108184006	yes	9.36965	0.770764	0.870089	2.2671	-2.39969	1	no	no
CT573337.1	ENSDARG00000117144	100002544	yes	10.2933	-0.706128	0.815247	15.7606	-1.14511	0.583954	no	no
CT583625.6	ENSDARG00000115732	110437711	yes	2.90411	-1.64263	0.760616	67.9756	-0.276013	0.812679	no	no
CT583651.2	ENSDARG00000098823	553320	yes	22.941	-0.294043	0.896304	93.6108	-1.43941	0.0589639	no	no
CT737184.2	ENSDARG00000112930	110440084	no	37.7302	-0.624246	0.663801	19.356	-1.02666	0.462355
CT990561.1	ENSDARG00000058284	797595	yes	74.1655	-0.811145	0.235818	83.505	-0.733514	0.26304	no	no
CT990561.2	ENSDARG00000104560	555422	yes	96.2077	0.00537502	0.998821	116.706	0.175834	0.968618	no	no
ctc1	ENSDARG00000070119	777638	yes	94.7467	-0.221993	0.876164	239.225	0.125943	0.875234	no	no
ctif	ENSDARG00000090617	100537309	yes	206.596	0.63828	0.409904	269.627	0.722908	0.253483	no	no
ctnnal1	ENSDARG00000018162	100034581	yes	84.812	0.0307133	0.988414	350.993	0.17182	0.847432	no	no
cttnbp2	ENSDARG00000040991	555837	yes	95.8746	-0.636106	0.556815	455.298	-0.737615	0.15344	no	no
ctxn3	ENSDARG00000114472	100331302	yes				0.322429	-5.07007	1	no	no
CU179759.1	ENSDARG00000112065	170990	no	0.323867	-3.48549	1	0.323871	-3.36122	1
CU302253.1	ENSDARG00000068586	100536704	yes	7.08679	-1.10045	0.72081	12.863	-1.04331	0.66292	no	no
CU302436.1	ENSDARG00000114500	103909883	yes	0.643334	-3.86158	0.168557	9.01947	-0.869347	1	no	no
CU457778.2	ENSDARG00000109381	100329258	yes	3.21263	0.147872	1	17.0546	-1.27601	0.517381	no	no
CU468041.2	ENSDARG00000115511	100331974	no	39.9462	0.0321871	0.988698	107.807	0.6018	0.530107
CU469530.2	ENSDARG00000114805	100150236	yes	56.8902	1.37384	0.312217	154.23	0.122147	0.928239	no	no
CU571081.1	ENSDARG00000113329	101885604	yes	26.3656	-0.155774	0.950708	107.4	0.322808	0.702082	no	no
CU633479.1	ENSDARG00000098747	100329748	yes	3.56253	-1.29433	0.774685	79.21	0.133129	0.952823	no	no
CU633479.2	ENSDARG00000103837	100329813	yes	28.3832	-0.846438	0.464697	50.2143	-0.304306	0.82784	no	no
CU651662.1	ENSDARG00000101240	100331330	yes	9.68059	1.00005	0.752595	9.99828	0.254474	1	no	no
CU655961.1	ENSDARG00000055690	100535121	yes	2.57334	-2.39707	0.340835	1.61214	-3.23545	1	no	no
CU672228.1	ENSDARG00000117125	170986	yes	10.97	0.62665	0.821098	13.2255	0.498874	1	no	no
CU681855.1	ENSDARG00000110612	100332753	yes	3.2194	-0.385506	1	7.71564	-2.84732	0.069161	no	no
CU693379.1	ENSDARG00000098777	569677	yes	25.1602	-0.648144	0.720388	149.996	-0.311412	0.727772	no	no
CU695232.1	ENSDARG00000098286	571446	yes	13.5893	0.590023	0.883388	13.5867	0.351805	1	no	no
CU855821.1	ENSDARG00000079661	571502	yes				2.2499	-2.05914	1	no	no
CU855878.1	ENSDARG00000079876	100332608	yes	31.0112	1.15662	0.598307	100.734	-0.230063	0.861905	no	no
CU856344.1	ENSDARG00000098311	100329491		77.0109	0.47007	0.720154				no	no
CU856539.1	ENSDARG00000010023	557306	yes	6.76231	-2.10266	0.122548	272.076	-1.92336	0.0209706	no	no
CU856539.2	ENSDARG00000058946	556989	yes	101.712	-0.163544	0.926335	186.78	-0.0585775	0.964055	no	no
CU861574.1	ENSDARG00000113654	100149327	yes				101.544	1.9208	0.0987667	no	no
CU896630.1	ENSDARG00000100883	100334054	yes	0.645358	-3.5286	1	2.58087	-2.04783	1	no	no
CU914164.1	ENSDARG00000104832	100332583	yes	2.25875	-3.5677	0.0915961	2.90186	-3.66461	0.0585475	no	no
CU914487.1	ENSDARG00000046021	101883528	yes				3.22286	-2.14101	1	no	no
CU928117.1	ENSDARG00000059587	565190	yes	99.5786	0.938444	0.200531	454.735	0.325663	0.582041	no	no
CU929146.1	ENSDARG00000110110	100001596	yes				4.17736	-0.213394	1	no	no
CU929150.2	ENSDARG00000100828	100536708	yes	10.684	1.24158	0.741898	11.6507	-0.11213	1	no	no
CU929230.1	ENSDARG00000030665	797473	yes	155.11	0.326121	0.739789	452.848	0.382094	0.505423	no	no
CU929259.1	ENSDARG00000101687	100001114	yes	793.509	1.179	0.0332698	908.206	1.06738	0.0272877	yes	yes
CU929418.2	ENSDARG00000112032	100333891	yes	10.6241	-1.87856	0.320614	46.9396	-2.26983	0.118444	no	no
CU984579.1	ENSDARG00000116863	564748	yes	1.28869	-3.58714	0.0911738	27.0757	-1.35785	0.238678	no	no
CU984600.2	ENSDARG00000098204	555303	yes	63.1713	-0.94498	0.390275	84.0771	-0.951613	0.260295	no	no
CU984600.3	ENSDARG00000098640	100005927	yes	4.83209	-2.07406	0.347597	83.103	-0.0138314	0.993405	no	no
cubn	ENSDARG00000087013	100144772	yes	95.7969	0.51153	0.688167	118.41	0.47947	0.646948	no	no
cul4a	ENSDARG00000096578	394002	yes	13.2384	-0.911772	0.667938	160.334	0.401343	0.677929	no	no
cutc	ENSDARG00000077306	450025	yes	41.8889	-0.429386	0.784242	142.254	-0.0599504	0.962336	no	no
cux2b	ENSDARG00000086345	565530	yes	23.5758	-1.29536	0.371316	26.7981	-1.34067	0.255196	no	no
cx28.1	ENSDARG00000041792	497173	yes	9.70531	1.10064	0.765635	9.70315	0.516821	1	no	no
cx39.4	ENSDARG00000070357	557275	no	523.86	4.55551	1.18714e-21	523.966	4.55589	1.17107e-21
cxcr2	ENSDARG00000054975	796724	yes	31.7365	2.1572	1	31.4126	1.90111	1	no	no
cxcr5	ENSDARG00000010514	100537421	yes	25.5336	0.523426	0.812954	29.7142	0.394308	0.825782	no	no
cyp17a2	ENSDARG00000053966	796487	no	3.88402	0.263684	1	3.88357	0.263156	1
cyp2aa7	ENSDARG00000103766	553537	yes	112.785	0.42212	0.725825	151.763	0.5971	0.542565	no	no
cyp2k6	ENSDARG00000009874	100001426	no	3.23189	-2.235	0.327849	2.26423	-1.44175	1
cyp46a1.3	ENSDARG00000089177	692332	yes	5.48352	-1.46712	0.638689	20.0023	-1.74418	0.186005	no	no
cyp7b1	ENSDARG00000008858	570455	yes	9.34172	-0.275055	0.922214	13.2098	-0.37401	1	no	no
cysltr3	ENSDARG00000101769	100334963	yes	9.64597	-0.592309	0.857601	11.9043	-1.17114	0.597742	no	no
CYTH2	ENSDARG00000028800	569358	yes	13.1833	0.104243	0.980351	15.1129	0.22757	1	no	no
CYTL1	ENSDARG00000110744	101886995	yes	18.6702	0.807832	0.717442	111.316	1.17289	0.118439	no	no
CZQB01141835.1	ENSDARG00000112811	110439853	yes	13.5157	0.0280709	0.994929	553.548	0.359469	0.655462	no	no
daam2	ENSDARG00000028393	798465	yes	11.2654	-1.68219	0.388048	23.1952	-1.18149	0.262479	no	no
dab2ipa	ENSDARG00000069484	100002454	yes	358.546	1.05604	0.0728107	399.228	0.816212	0.199733	no	no
dact1	ENSDARG00000101635	405799	yes	13.18	-1.77872	0.190475	151.601	-1.7339	0.0170804	no	no
dact3a	ENSDARG00000087910	101884530	yes	18.0719	-1.11409	0.421454	25.1757	-1.21627	0.269023	no	no
daglb	ENSDARG00000089888	565287	yes	23.5903	-0.20296	0.935181	43.6178	0.476192	0.773228	no	no
dap1b	ENSDARG00000109678	101885164	yes	7125.22	1.17497	0.0771337	4353.26	1.32612	0.0533688	no	no
dapk2b	ENSDARG00000103666	556756	yes	2.25875	-2.283	0.519369	7.72692	-2.26304	0.186395	no	no
dars	ENSDARG00000070043	324025	yes	329.146	0.24174	0.875534	1402.81	0.620914	0.213921	no	no
dbn1	ENSDARG00000069113	561153	yes	67.0735	0.271782	0.850102	4375.94	0.359635	0.437871	no	no
dcaf8	ENSDARG00000000324	100007924	yes	189.539	0.94968	0.291056	541.531	0.355886	0.560185	no	no
dcc	ENSDARG00000104282	569360	no	7.09832	-2.37585	0.0456849	4.5069	-2.9525	0.067955
dclk2b	ENSDARG00000102845	100332814	yes	1.93607	-2.11958	0.609371	1.93457	-2.0058	1	no	no
dclk3	ENSDARG00000078997	100333376	yes	5.15881	-1.42968	0.639024	8.70273	-1.43926	0.580829	no	no
ddah1	ENSDARG00000103042	406561	yes	1.93607	-1.81204	0.704032	67.0208	-0.888576	0.25489	no	no
ddb1	ENSDARG00000074431	393599	yes	517.7	0.288133	0.711867	960.456	0.419858	0.390216	no	no
ddhd2	ENSDARG00000076765	100321082	yes	69.4946	0.0985136	0.957766	216.825	0.0832224	0.928137	no	no
def6c	ENSDARG00000034717	563690	yes	23.8439	1.68077	0.382719	71.2426	1.05729	0.200288	no	no
dennd1a	ENSDARG00000014592	556150	yes	12.2314	-0.250807	0.949944	247.298	-0.138289	0.863152	no	no
dennd5a	ENSDARG00000017006	799847	yes	120.523	0.168821	0.878421	140.208	0.207556	0.811562	no	no
dgkb	ENSDARG00000027724	557324	no	6.1499	-0.609199	0.881619	6.14922	-0.750521	1
dgkh	ENSDARG00000018716	100137124	yes	231.287	1.22419	0.0671588	2214.07	1.26843	0.00287505	no	yes
DGKI	ENSDARG00000063578	100331649	yes	30.9416	1.6734	0.236849	1029.29	1.70943	0.00376616	no	yes
dhx29	ENSDARG00000040326	553505	yes	161.145	0.207554	0.844618	209.88	0.270132	0.72012	no	no
dhx30	ENSDARG00000077839	570735	yes	3.85191	-2.72764	0.199098	5.78098	-2.32975	0.277378	no	no
dhx36	ENSDARG00000101059	569072	yes	119.129	-0.478235	0.602972	269.244	-0.327919	0.577524	no	no
dhx58	ENSDARG00000089463	100148871	yes	5.15868	-1.36017	0.506958	7.08501	-1.0042	1	no	no
dip2a	ENSDARG00000078058	100332244	yes	81.2874	1.36116	0.134453	3528.57	2.20914	2.6905e-08	no	yes
DISP3	ENSDARG00000036999	100535855	yes	25.1861	-0.88483	0.601711	34.5649	-0.543765	0.750017	no	no
dlc1	ENSDARG00000079317	567965	yes	68.9005	0.441161	0.762743	2162.99	1.5535	4.23022e-05	no	yes
dlg4a	ENSDARG00000041926	100000823	yes	4.50334	-2.05549	0.336337	30.3147	-0.873851	0.383695	no	no
dlgap1a	ENSDARG00000014280	569898	yes	21.9266	-1.39972	0.487876	33.8132	-1.53828	0.319353	no	no
dlgap1b	ENSDARG00000037415	571372	yes	32.8627	-1.2021	0.303399	38.6519	-1.25774	0.258446	no	no
dlgap2b	ENSDARG00000092376	796210	yes				11.6363	-1.98962	0.145599	no	no
dlk2	ENSDARG00000076247	100150992	yes	2.57131	-1.70556	0.59371	5.79812	-1.29289	1	no	no
dmgdh	ENSDARG00000025703	100141496	yes	4.83851	-2.84901	0.0419664	16.1089	-2.91362	8.21758e-06	no	no
dnaaf2	ENSDARG00000103132	606664	yes	10.9927	-0.468028	0.876468	27.761	0.316083	0.853867	no	no
dnaaf3	ENSDARG00000092662	100148431	yes	0.322679	-3.48714	1	1.61214	-2.2068	1	no	no
dnaaf3l	ENSDARG00000036304	100536527	yes	4.84515	-0.335422	0.951985	4.84661	-0.480231	1	no	no
dnah1	ENSDARG00000100115	100317899	yes	44.2026	-0.518698	0.691157	88.4099	-0.0123141	0.993952	no	no
DNAH10	ENSDARG00000061486	569992	yes	229.846	1.14901	0.0862796	237.558	1.16557	0.0703122	no	no
dnah5	ENSDARG00000087373	100535326	yes	43.5205	-0.87445	0.429796	45.1206	-1.07802	0.232108	no	no
dnah6	ENSDARG00000000606	100148193	yes	42.9448	-1.42875	0.0675387	42.9456	-1.56293	0.0329317	no	no
dnah9l	ENSDARG00000062630	552915	yes	72.0034	-0.0142419	0.994208	39.6581	-0.997081	0.242391	no	no
dnai2b	ENSDARG00000074081	101884977	yes	21.8312	0.175224	0.960062	23.4535	-0.100468	0.971847	no	no
dnajb5	ENSDARG00000052881	569466	yes	15.1629	0.744978	0.761325	344.039	1.09718	0.0153566	no	yes
dnajb9a	ENSDARG00000052072	574005	yes	3.54137	-0.940152	0.828226	228.081	-0.41321	0.6938	no	no
dnajc16	ENSDARG00000059699	559762	yes	13.8787	-1.51869	0.222527	22.8857	-1.41595	0.118404	no	no
dner	ENSDARG00000061031	100332110	no	8.0434	-1.6087	0.290028	8.04659	-1.58894	0.280537
dntt	ENSDARG00000104792	544653	yes							no	no
doc2d	ENSDARG00000079962	100002795	no	51.3519	0.0117896	0.996369	44.5705	-0.00772708	0.997509
dock1	ENSDARG00000099093	572187	yes	246.822	0.846414	0.266609	264.232	0.739832	0.270175	no	no
DOCK9	ENSDARG00000114086	566175	yes	116.159	1.89015	0.00858225	1439.1	2.88647	3.06552e-12	yes	yes
dpep2	ENSDARG00000079216	100534995	yes	42.5976	0.933429	0.628786	184.644	0.374402	0.726762	no	no
dpp6a	ENSDARG00000076826	100007104	yes	4.836	-2.1835	0.132445	28.7212	-0.950704	0.342621	no	no
dpyda.1	ENSDARG00000102671	768165	yes	265.363	1.78833	0.0875373	429.833	1.47891	0.0418525	no	yes
dpyda.3	ENSDARG00000086853	768165	yes	140.292	1.12049	0.104434	429.833	1.47891	0.0418525	no	yes
DPYSL2	ENSDARG00000038974	798555	yes	22.1846	-0.438458	0.853074	39.6309	-0.106723	0.949716	no	no
dqx1	ENSDARG00000059455	100002601	yes	14.7906	-0.182687	0.961119	29.6023	-0.14104	0.961586	no	no
dram2a	ENSDARG00000043569	792944	yes	9.38857	3.86197	0.329798	22.2968	0.180283	0.93476	no	no
drd1a	ENSDARG00000071640	792634	yes	4.19623	-1.11088	0.775588	8.06237	-2.47865	0.0470146	no	no
drd6b	ENSDARG00000040765	100001636	yes	7.75142	-0.909635	0.786297	12.605	-0.574766	1	no	no
drd7	ENSDARG00000056284	100002285	no	9.32127	-0.280053	0.946368	9.32485	-0.279712	1
dscaml1	ENSDARG00000098057	100002762	yes	84.5597	-1.3037	0.227724	762.224	-0.962779	0.42342	no	no
dsela	ENSDARG00000061461	568099	yes	22.6173	-1.01053	0.49302	23.8988	-1.14854	0.335622	no	no
dsn1	ENSDARG00000089922	100002916	yes	177.527	-0.370046	0.818643	300.46	-0.367819	0.703509	no	no
dtwd2	ENSDARG00000101873	100537837	yes	202.306	0.554607	0.596423	250.774	0.660328	0.438267	no	no
duox	ENSDARG00000062632	565097	yes	15.7897	-0.45693	0.855723	12.5363	-0.989166	0.685544	no	no
dusp10	ENSDARG00000052465	100034609	yes	9.36063	-0.502754	0.858302	270.472	1.43898	0.010071	no	yes
DUSP26	ENSDARG00000103752	570815	yes	2.25792	-2.00063	0.462072	107.109	-0.631226	0.34119	no	no
dvl1a	ENSDARG00000010515	569863	yes	35.8332	0.792362	0.642685	99.2103	0.707882	0.463338	no	no
dym	ENSDARG00000042555	572325	no	18.6712	-0.487959	0.849382	18.6711	-0.487856	0.828414
dync1i2b	ENSDARG00000103195	561612	yes	22.8266	0.469676	0.844909	103.422	0.179421	0.858821	no	no
DYNC2H1	ENSDARG00000113761	100332402	yes	124.423	-0.761151	0.242555	240.949	-0.57247	0.324563	no	no
e2f1	ENSDARG00000103868	101885420	yes	1.60649	-2.59159	0.369488	434.862	0.0940555	0.905356	no	no
echdc3	ENSDARG00000099787	780842	no
edem3	ENSDARG00000074129	559811	yes	45.2617	0.0736282	0.983102	1420.9	0.839456	0.0274537	no	no
edil3b	ENSDARG00000060877	571937	yes	4.18708	-0.695417	0.838573	6.43441	0.31472	1	no	no
eea1	ENSDARG00000062868	492695	yes	172.986	0.708716	0.389195	605.456	0.534907	0.402239	no	no
efnb1	ENSDARG00000007723	114377	no	38.7204	0.675965	0.725973	38.3911	0.683662	0.692744
efr3bb	ENSDARG00000069318	561353	yes	92.6313	0.697654	0.510837	150.043	0.742046	0.310133	no	no
EGFLAM	ENSDARG00000099008	799405	yes	19.0249	-1.25103	0.438581	145.52	-1.71024	0.0726681	no	no
ehd2a	ENSDARG00000035137	567055	yes	9.716	0.322866	0.956725	16.1892	0.943376	1	no	no
ehmt2	ENSDARG00000102325	569250	no	183.492	-0.244119	0.82769	183.881	-0.230186	0.81589
eif2b5	ENSDARG00000074995	563613	no	86.2087	-0.129301	0.939104	86.5738	-0.123261	0.930734
elk1	ENSDARG00000078066	567895	yes	78.6737	-0.0876969	0.946075	460.95	0.364036	0.590139	no	no
eloa	ENSDARG00000102365	406764	no	63.8472	1.18287	0.271369	63.5225	1.17562	0.256329
emilin2a	ENSDARG00000061196	100001725	yes	119.652	0.290441	0.759831	749.528	0.837753	0.149639	no	no
EML4	ENSDARG00000109443	100334728	yes	49.346	0.289981	0.834691	1788.25	0.904331	0.0390938	no	no
enc2	ENSDARG00000102418	556885	yes	165.25	-0.76949	0.350728	543.789	-0.301924	0.608874	no	no
ENKD1	ENSDARG00000043550	563309	yes	11.3218	1.42849	0.678955	13.8934	-0.000629138	1	no	no
enox1	ENSDARG00000060243	100002220	yes	28.9159	-1.24508	0.439787	149.816	-0.878477	0.271337	no	no
entpd2a.2	ENSDARG00000033953	559298	yes	32.7251	0.255927	0.945308	60.0668	-0.0802717	0.976525	no	no
entpd2b	ENSDARG00000044795	569142	yes	0.320656	-5.06773	0.0647608	2.25558	-2.51743	1	no	no
ep400	ENSDARG00000100965	562355	yes	265.268	0.0111956	0.992476	890.784	-0.190195	0.757687	no	no
epb41a	ENSDARG00000099283	559643	yes	379.126	-0.971966	0.163666	772.526	-1.19032	0.126017	no	no
epb41l3b	ENSDARG00000019917	407981	yes	71.4184	-0.216472	0.896304	75.6741	-0.063966	0.967607	no	no
epc1a	ENSDARG00000101579	566686	yes	75.8138	0.351751	0.754073	731.764	0.201277	0.772462	no	no
epg5	ENSDARG00000059846	569543	yes	55.1581	-0.0923095	0.956725	62.2628	-0.0536093	0.970739	no	no
epha2b	ENSDARG00000022727	568718	yes	249.878	1.92337	0.00830736	423.371	1.45272	0.016508	yes	yes
epha3	ENSDARG00000039373	795902	yes	33.7363	-1.73271	0.344747	141.712	-1.33299	0.0912515	no	no
ephb1	ENSDARG00000076757	100333537	yes	16.1354	-1.35662	0.226046	60.8929	-1.86908	0.00184747	no	no
EPHB3	ENSDARG00000103576	555957	yes	25.7713	-0.801742	0.548772	123.135	-1.40296	0.00802842	no	no
epm2a	ENSDARG00000059044	100535304	yes	16.4735	0.718452	0.776875	19.3703	0.0485696	0.984022	no	no
epn3b	ENSDARG00000004633	571453	yes	7.71394	-0.281458	0.948477	30.5898	-0.653736	0.623198	no	no
epsti1	ENSDARG00000094578	101884931	yes	4.20266	-0.942634	0.784878	7.09506	-1.7127	1	no	no
erc2	ENSDARG00000105178	572002	yes	42.2337	-0.839613	0.374239	52.8982	-0.819899	0.333439	no	no
ercc6l2	ENSDARG00000012403	553504	yes	96.6518	-0.498256	0.54153	132.428	-0.261787	0.752635	no	no
erg	ENSDARG00000077304	494073	yes	64.5236	2.93902	0.0180418	5839.93	5.26939	7.04665e-22	yes	yes
ERG28	ENSDARG00000111290	565132	yes	2.90209	-1.41911	0.712174	1.61214	-2.76908	1	no	no
ern2	ENSDARG00000058475	567021	yes	28.7344	0.387484	0.83411	31.6113	-0.0587803	0.974597	no	no
espn	ENSDARG00000076414	567061	yes	80.5968	-0.80604	0.39854	62.0972	-1.35599	0.167065	no	no
espnlb	ENSDARG00000093112	566645	yes	8.03662	-2.22033	0.19044	13.1897	-1.97819	0.220246	no	no
esrra	ENSDARG00000069266	405891	yes	11.9228	-1.081	0.574887	236.193	-0.102167	0.916847	no	no
esyt1a	ENSDARG00000034714	567227	yes	9.66013	-0.905049	0.753349	26.7879	-0.180898	0.913645	no	no
ets1	ENSDARG00000024431	280651	yes	265.485	2.24945	3.34165e-05	777.657	2.91751	1.07541e-09	yes	yes
evlb	ENSDARG00000099720	402929	yes	8.65972	-2.83347	0.148117	170.82	-1.77575	0.0339584	no	no
ewsr1b	ENSDARG00000117011	110440168	yes				71.5752	-0.347899	0.717343	no	no
exosc3	ENSDARG00000104246	324574	yes				258.687	0.335003	0.749341	no	no
exosc4	ENSDARG00000103432	393712	yes	25.6767	-0.387471	0.903697	134.512	-0.0393814	0.978692	no	no
exosc7	ENSDARG00000100060	550247	yes	211.24	0.586894	0.487459	234.779	0.524625	0.486181	no	no
ext1c	ENSDARG00000035649	108179064	yes	20.0489	0.338222	0.914306	20.0499	0.666731	0.82694	no	no
F13A1	ENSDARG00000094832	558353	yes				5.14323	-1.25504	1	no	no
f2r	ENSDARG00000060012	558477	no	148.49	1.86623	0.0677209	148.219	1.87555	0.0604286
faah	ENSDARG00000077764	569067	no	19.3902	0.863104	0.702428	19.3877	1.10071	1
fadd	ENSDARG00000103021	562317	yes	36.753	-0.0276585	0.990243	70.933	-0.0656162	0.956791	no	no
fam110a	ENSDARG00000015293	100004155	yes	20.6552	2.53677	0.192581	70.0917	1.73896	0.0950368	no	no
fam114a2	ENSDARG00000079508	563599	yes	564.834	0.237652	0.737549	834.29	0.298377	0.58987	no	no
fam124b	ENSDARG00000087489	572460	yes	1.92393	-2.81664	0.34717	7.39741	-2.11213	0.184931	no	no
FAM135B	ENSDARG00000105121	100003594	yes	34.453	-1.74713	0.0271259	78.2172	-1.95051	0.00621147	no	no
fam136a	ENSDARG00000098401	406709	no	51.4653	-0.865609	0.590239	59.5188	-0.783993	0.60554
fam155b	ENSDARG00000060152	791161	yes	18.9462	-1.65551	0.366196	92.3975	-1.01281	0.324983	no	no
fam160a1b	ENSDARG00000102585	100332943	yes	20.0066	0.27808	0.922121	80.9123	0.989402	0.491289	no	no
fam160a2	ENSDARG00000078188	100001896	yes	144.094	1.40075	0.128913	600.624	0.437625	0.543523	no	no
fam163b	ENSDARG00000073914	100537920	yes	8.06565	-1.2168	0.578098	18.6597	-1.61375	0.203321	no	no
FAM163B	ENSDARG00000107989	794939	yes	3.53566	-1.75673	0.477188	4.52698	-1.44113	1	no	no
fam169ab	ENSDARG00000004177	553309	yes	13.5893	-0.220783	0.954075	71.939	-2.21703	1.55963e-06	no	no
fam169b	ENSDARG00000069321	558610	yes				0.321008	-4.42187	1	no	no
fam171a1	ENSDARG00000079788	795681	yes	83.932	1.03207	0.344748	4258.76	1.89842	5.60639e-09	no	yes
fam19a5l	ENSDARG00000068100	100004683	yes	5.15024	-1.81175	0.292119	48.9271	-1.32079	0.180318	no	no
fam20ca	ENSDARG00000074317	792520	yes	20.9924	-1.3862	0.221444	55.4902	-0.486822	0.648876	no	no
fam20cb	ENSDARG00000090338	560397	yes	4.18268	-2.93508	0.0789461	12.2684	-1.61212	0.212944	no	no
fam217b	ENSDARG00000088505	557141	yes	3.54947	-0.789765	0.879946	9.65439	-1.5085	0.470424	no	no
fam222a	ENSDARG00000090797	793922	yes	17.7412	-1.00291	0.472727	214.33	-0.779795	0.387607	no	no
fam222ba	ENSDARG00000059886	561123	yes	103.796	-0.155516	0.890213	803.692	0.187174	0.820378	no	no
fam57a	ENSDARG00000098860	100002814	yes	44.0663	-0.0680035	0.978398	58.5715	-0.520097	0.699453	no	no
fam78aa	ENSDARG00000101217	559300	yes	10.6669	-0.0847454	0.982155	22.0002	0.416337	0.870311	no	no
fam83c	ENSDARG00000075296	570133	yes	37.3888	-0.188517	0.907511	190.59	1.3854	0.0803048	no	no
fam83ha	ENSDARG00000068849	565437	yes	666.447	2.22944	7.19915e-05	766.638	2.08407	5.78858e-05	yes	yes
fam84b	ENSDARG00000032859	767732	yes	3.54947	-2.51902	0.359348	13.8947	-1.56154	0.32534	no	no
fam8a1a	ENSDARG00000017111	100537042	yes	2.56524	-2.22211	0.559937	5.77814	-2.39434	0.362451	no	no
fam98a	ENSDARG00000078391	559900	yes	140.935	2.57891	0.00124823	516.559	0.829018	0.0589353	yes	no
fanca	ENSDARG00000098241	692125	no	1.28262	-3.36654	0.242784	0.321008	-5.3583	1
fancb	ENSDARG00000067596	108179053	yes	11.627	-0.809205	0.724166	22.2624	-0.401746	0.79948	no	no
fastkd2	ENSDARG00000074031	564382	yes	232.437	-0.0197103	0.99041	377.988	0.109012	0.899295	no	no
fastkd3	ENSDARG00000100440	100003734	yes	82.1365	-0.38823	0.763943	148.603	-0.234928	0.813466	no	no
faxcb	ENSDARG00000078981	563796	yes	9.67034	-1.28586	0.403167	18.0335	-0.979031	0.467006	no	no
fbln1	ENSDARG00000103311	30240	yes	5.47138	-2.31052	0.247386	5.47134	-2.69873	0.0957023	no	no
fbn2b	ENSDARG00000098237	571786	yes	134.916	-0.200959	0.878773	1116.99	-0.507309	0.424135	no	no
fbxo10	ENSDARG00000061936	563863	no	24.1974	-1.09494	0.296978	23.8745	-0.981658	0.358926
fbxo21	ENSDARG00000076611	567738	yes	16.4756	-0.304446	0.906449	172.024	-0.035641	0.976567	no	no
fbxo28	ENSDARG00000027159	556288	yes	44.5834	1.97832	0.140272	66.8504	1.352	0.234982	no	no
fbxo33	ENSDARG00000075400	567750	yes	56.8951	0.732805	0.65204	1363.83	0.218636	0.739377	no	no
fdxacb1	ENSDARG00000095750	566022	no	27.7767	-0.316073	0.870231	27.7753	-0.302786	0.857868
fdxr	ENSDARG00000089369	100536115	yes	2.57131	-2.70853	0.252803	15.1215	-0.894614	0.704444	no	no
fer1l6	ENSDARG00000019316	100535460	yes	15.8556	-0.723182	0.778248	78.253	0.322113	0.857548	no	no
ferd3l	ENSDARG00000092160	110438133	yes				5.80087	-0.788165	1	no	no
FERMT3	ENSDARG00000079267	100320305	yes	149.213	2.23718	0.00168279	173.093	2.0442	0.00303141	yes	yes
FFAR1	ENSDARG00000087828	100535798	no	9.716	0.207182	0.97547	11.6507	0.362487	1
fgf12b	ENSDARG00000113525	751749	yes	35.4505	-0.726617	0.646076	221.633	-0.961532	0.168918	no	no
fgf14	ENSDARG00000040982	497642	yes	4.85562	0.00189157	0.999827	125.085	-1.94561	0.00796901	no	no
fgf22	ENSDARG00000076510	100005852	no	4.18673	-1.4714	0.621396	4.18589	-1.47179	1
fgf5	ENSDARG00000035377	494454	no
fgf9	ENSDARG00000078625	101883614	yes	10.6443	2.04478	0.416855	109.499	3.23382	0.00425311	no	yes
fgfr1b	ENSDARG00000011190	567905	yes	40.914	-1.69214	0.131568	62.8033	-1.82546	0.0425445	no	no
fhdc5	ENSDARG00000095962	101882071	yes				20.3147	-0.726685	0.686259	no	no
fibcd1	ENSDARG00000060393	567525	yes	10.9306	-0.702749	0.83921	41.0182	-0.463356	0.738929	no	no
FIG4	ENSDARG00000107912	100334605	yes	60.9705	0.0148745	0.993566	160.557	0.220676	0.785511	no	no
flncb	ENSDARG00000018820	570288	yes	158.084	0.616544	0.555472	817.749	0.717983	0.252759	no	no
flvcr2a	ENSDARG00000038957	565210	yes	4.824	-0.00745088	0.999827	15.7894	0.287761	1	no	no
fmn1	ENSDARG00000011975	561077	yes	19.3632	-0.710384	0.696139	28.0405	-0.944492	0.411779	no	no
fmodb	ENSDARG00000010294	797559	yes	11.8941	-1.48264	0.359348	39.8874	-1.74648	0.174046	no	no
fnbp1a	ENSDARG00000036156	558990	yes	20.3105	-0.739184	0.587039	387.645	-0.42069	0.536832	no	no
FO082781.1	ENSDARG00000076638	100332760	yes	141.875	-1.04618	0.203828	1242.43	-0.938092	0.0739073	no	no
FO681393.2	ENSDARG00000115939	110437764	yes	5.49896	0.277582	0.961875	15.8266	0.44181	1	no	no
FO704622.1	ENSDARG00000089661	100538089	yes	14.2266	0.758967	0.785321	6.77685	-0.00286173	1	no	no
FO704810.1	ENSDARG00000087492	100005008	yes	13.8923	-0.52925	0.853191	33.2727	0.146596	0.947359	no	no
FO704813.1	ENSDARG00000105022	100329607	yes	9.67808	-1.79463	0.126649	30.3448	-1.84523	0.021513	no	no
FO704821.1	ENSDARG00000113257	100151586	yes	16.4886	1.03162	0.67772	48.7092	0.193665	0.886744	no	no
FO704822.1	ENSDARG00000102513	100329446	yes	0.961967	-2.42535	1	2.25274	-2.15328	1	no	no
FO704871.1	ENSDARG00000078272	100329495	yes	16.777	-2.50113	0.0765769	46.4718	-2.2822	0.0225469	no	no
FO818704.1	ENSDARG00000099032	108190739	yes				9.71613	1.74148	1	no	no
FO818722.1	ENSDARG00000112453	101884782	yes	6.14634	-0.0710769	0.990217	15.8581	0.616638	1	no	no
FO818743.1	ENSDARG00000102675	100334841	yes	0.641311	-5.67577	0.000683605	10.6433	-2.16545	0.0309808	no	no
FO834799.1	ENSDARG00000110103	110438398	yes	37.0011	-0.182472	0.924727	59.9218	0.213519	0.875234	no	no
FO834855.1	ENSDARG00000110877	103910147	yes	3.87012	-2.41839	0.321061	16.1259	-1.6372	0.277378	no	no
FO834857.1	ENSDARG00000112895	100535338	yes	35.166	0.677833	0.735409	70.3898	0.509141	0.744178	no	no
FO834888.1	ENSDARG00000055550	100331324	yes	14.156	-0.189518	0.944957	16.731	-0.904211	0.565119	no	no
FO904880.1	ENSDARG00000110366	103909721	yes	28.1116	1.39626	0.500707	13.2257	0.398304	1	no	no
FO907110.1	ENSDARG00000100364	100537553	yes	10.3477	0.245292	0.956725	17.7785	-0.710734	0.724985	no	no
foxb2	ENSDARG00000037475	559714	yes	9.6882	-0.00242125	0.999827	11.2895	-1.12067	0.466772	no	no
foxf1	ENSDARG00000015399	566407	yes	17.4651	-1.76044	0.343234	38.7842	-1.88079	0.0804327	no	no
foxg1c	ENSDARG00000068380	571323	no	1.6053	-2.2711	0.496263	1.60646	-2.27053	1
foxj2	ENSDARG00000057680	558490	yes	247.046	0.66117	0.452102	310.255	0.749403	0.30377	no	no
FOXN2	ENSDARG00000055574	100330010	no	9.6512	-1.2879	0.529347	6.1219	-1.36926	1
FP016205.1	ENSDARG00000114704	570693	yes	6.10864	-2.43266	0.201039	81.9614	-0.579889	0.581872	no	no
FP085398.1	ENSDARG00000087611	559789	yes	73.9748	0.14699	0.937441	94.8998	0.162047	0.917321	no	no
FP102052.1	ENSDARG00000069333	793236	yes	2.89804	-2.19258	0.391108	8.04508	-1.33727	1	no	no
FP102192.1	ENSDARG00000101104	101886648	yes	12.2689	0.116065	0.973828	16.1577	0.472508	1	no	no
FP102911.1	ENSDARG00000107576	100002268	yes	7.74605	-1.30013	0.491052	37.4886	-0.426904	0.784443	no	no
FP103009.1	ENSDARG00000116341	794838	yes	3.23224	-2.13865	0.436115	58.3009	-1.63285	0.0259784	no	no
FP236810.2	ENSDARG00000113218	571561	yes	1.93607	-1.66457	1	2.257	-3.21584	1	no	no
FP236812.2	ENSDARG00000114180	100334869	yes	114.566	0.683761	0.568208	102.563	0.618031	0.470563	no	no
FP245456.1	ENSDARG00000098720	101884800	yes	10.9224	-0.313609	0.932904	73.4467	-0.315233	0.752576	no	no
FP885542.1	ENSDARG00000089248	103911930	yes							no	no
FQ311924.1	ENSDARG00000099542	101883490	yes	13.2714	1.89782	0.626254	13.5911	-0.0983102	1	no	no
FQ976913.1	ENSDARG00000110361	560627	yes	131.805	-0.0425264	0.977822	238.742	0.0870862	0.936493	no	no
FQ976914.1	ENSDARG00000098654	101885083	yes	586.779	3.11487	2.72016e-08	621.926	3.08648	1.54447e-08	yes	yes
FRMD4A	ENSDARG00000042249	564713	yes	94.1964	0.588115	0.580179	437.086	0.769356	0.206309	no	no
frmd4bb	ENSDARG00000076496	100329900	yes	39.6717	0.895309	0.532526	49.3366	0.347526	0.810015	no	no
FRMD5	ENSDARG00000075942	570903	yes	4.50726	-2.12848	0.249735	101.194	-1.71664	0.000992972	no	no
FRMD7	ENSDARG00000070495	557811	yes				71.5283	0.639106	0.682775	no	no
frmpd2	ENSDARG00000074119	571843	yes	13.2611	-1.35757	0.53379	17.4545	-1.58729	0.331733	no	no
frrs1a	ENSDARG00000076183	100536707	yes	0	-5.6695	0.0865805	3.86914	-1.58976	1	no	no
frrs1b	ENSDARG00000077605	557898	yes	15.1072	-0.179695	0.962427	137.273	0.508613	0.498404	no	no
frrs1l	ENSDARG00000103940	100536668	yes	1.61339	-1.92911	1	1.61214	-2.63439	1	no	no
fsbp	ENSDARG00000101437	101884826	yes	33.5631	0.766841	0.691895	41.3021	-0.111161	0.950174	no	no
fscn2a	ENSDARG00000059574	798075	yes	17.7653	-0.469611	0.877208	19.7031	-0.866259	0.645366	no	no
ftr12	ENSDARG00000074118	571427	yes				159.394	1.56396	0.150919	no	no
ftr13	ENSDARG00000079537	571442	yes	5.16119	0.411625	0.926735	13.5666	-0.85526	0.654592	no	no
ftr14l	ENSDARG00000078254	100536151	yes	11.298	0.602856	0.854822	7.42311	-0.567943	1	no	no
ftr19	ENSDARG00000094131	560786	yes	10.9964	-0.234564	0.949944	17.4287	-0.975752	0.542166	no	no
ftr22	ENSDARG00000076969	560422	yes	0	-5.1835	1	16.1589	0.321455	1	no	no
ftr25	ENSDARG00000093651	101882560	yes	1.92596	-2.00951	0.57175	8.37178	-1.34952	1	no	no
ftr26	ENSDARG00000092961	560716	yes	12.9299	0.276784	0.936019	18.3918	-0.02741	0.991894	no	no
ftr30	ENSDARG00000095448	100535574	yes	5.17474	-0.953974	0.781029	9.67286	-0.978476	1	no	no
ftr32	ENSDARG00000093203	108180198	yes	4.51346	-1.10417	0.764801	3.88645	0.77587	1	no	no
ftr33	ENSDARG00000095032	791496	yes	6.4293	-0.895622	0.792902	15.8381	-0.000688222	0.999792	no	no
ftr35	ENSDARG00000089388	100005754	yes	4.85444	-0.949459	0.79343	5.18049	-1.77955	1	no	no
ftr36	ENSDARG00000087057	100126118	yes				11.9472	-0.375923	1	no	no
ftr37	ENSDARG00000092745	567984	yes	6.44953	0.22969	0.97094	37.4051	-0.282854	0.859393	no	no
ftr50	ENSDARG00000115041	100137114	yes				33.9445	1.6728	0.328638	no	no
ftr50	ENSDARG00000116623	100330744	yes				8.38336	-0.470991	1	no	no
ftr55	ENSDARG00000009161	569296	yes	0.961967	-2.94794	0.438373				no	no
ftr59	ENSDARG00000095864	558486	yes	13.5817	1.39421	0.590843	20.6701	0.243876	0.916257	no	no
ftr61	ENSDARG00000055520	570050	yes	18.1163	1.71935	0.637545	10.0371	0.561919	1	no	no
ftr70	ENSDARG00000076019	793898	yes	3.2106	-0.774671	0.870832	6.45163	-0.53936	1	no	no
ftr80	ENSDARG00000067661	101883527	yes	0.641311	-3.32735	1	7.10512	-0.39721	1	no	no
ftr95	ENSDARG00000073735	100005532	yes	14.474	-0.216726	0.958027	13.8673	-0.748512	0.784089	no	no
ftr98	ENSDARG00000052332	100000633	yes	4.21027	-1.50805	0.708943	16.4686	-0.704337	0.674596	no	no
ftr99	ENSDARG00000035339	568523	yes	22.9208	0.655828	0.765999	46.7604	0.518717	0.677656	no	no
fubp3	ENSDARG00000086896	493616	no	226.43	-0.132672	0.904378	226.171	-0.113269	0.906127
fut8b	ENSDARG00000088117	100331714	yes	9.06351	0.0541192	0.991954	11.9645	-0.720271	0.784259	no	no
fuz	ENSDARG00000079730	797090	yes	0.320656	-5.1096	0.0728107	3.86204	-2.3279	1	no	no
fyco1a	ENSDARG00000104500	565649	yes	57.5037	0.284496	0.89342	54.6067	0.142706	0.946695	no	no
fyco1b	ENSDARG00000078022	100329883	yes	42.1565	-0.921671	0.528979	49.5633	-0.821515	0.54484	no	no
fzd9a	ENSDARG00000035185	557447	yes	14.1797	-0.970105	0.717985	19.6497	-1.21237	0.566293	no	no
g6pcb	ENSDARG00000014967	100000750	yes	4.53413	-0.192373	0.980069	4.53419	-0.836796	1	no	no
gabbr1b	ENSDARG00000016667	558708	yes	40.032	-1.22055	0.180692	36.8079	-1.24369	0.187329	no	no
gabbr2	ENSDARG00000061042	560267	no	19.2829	-1.4227	0.327745	19.2947	-1.42202	0.306611
gabra3	ENSDARG00000090883	100538116	yes				1.60788	-2.49085	1	no	no
gabra5	ENSDARG00000070730	799124	yes	8.35525	-3.18093	0.0143441	35.429	-2.60388	0.00235978	no	no
gabrb4	ENSDARG00000099096	566514	yes	233.81	-1.25266	0.126761	331.866	-1.27294	0.0985105	no	no
gabrg2	ENSDARG00000053665	553402	yes	116.85	-0.861116	0.635846	152.976	-0.927752	0.49299	no	no
gabrp	ENSDARG00000020901	566633	yes	19.2929	-1.65292	0.225868	44.0451	-1.768	0.147782	no	no
GABRR1	ENSDARG00000098081	100330554	yes	5.47745	-1.50224	0.596423	26.4482	-0.388304	0.832614	no	no
gabrr1	ENSDARG00000043902	568984	yes	18.3988	-1.10251	0.621629	80.46	-1.11302	0.35892	no	no
gabrr3b	ENSDARG00000030750	561083	yes	43.3267	-1.02268	0.671419	67.8555	-1.59341	0.203898	no	no
gad1a	ENSDARG00000093411	100329827	yes	12.3022	0.443007	0.914174	16.4715	-0.456843	0.821671	no	no
gal3st1b	ENSDARG00000078245	793584	yes	9.3737	-0.756825	0.780192	17.1135	-0.317399	0.866868	no	no
GALNT10	ENSDARG00000100453	103910015	yes	5.47745	-1.12552	0.732858	92.5428	0.563928	0.573272	no	no
galnt12	ENSDARG00000055490	559736	yes	17.452	-0.078817	0.985713	90.0193	0.492081	0.681622	no	no
GALNT3	ENSDARG00000108649	100331984	yes	9.3459	-1.92535	0.195326	17.1163	-1.27111	0.299649	no	no
galnt8a.1	ENSDARG00000115940	568645	no	12.9156	-1.62169	0.168796	3.23871	0.742174	1
galr2a	ENSDARG00000020853	110438944	yes	4.858	-0.263692	0.972893	12.2739	-0.112371	1	no	no
GAN	ENSDARG00000100875	100537435	yes	25.8773	0.466114	0.854581	26.5229	0.189988	0.936358	no	no
gareml	ENSDARG00000073933	100331995	yes	7.74025	-2.14369	0.32432	16.4483	-1.71321	0.152161	no	no
GARNL3	ENSDARG00000060631	560594	yes	37.1676	-1.49822	0.162935	170.945	-2.09172	1.38113e-07	no	no
gart	ENSDARG00000101089	58141	yes	45.1275	-0.450346	0.713637	168.682	-0.44531	0.670359	no	no
gas2a	ENSDARG00000001259	557312	yes	2.24661	-2.15553	0.484638	8.70439	-1.6231	0.252844	no	no
gb:ai877918	ENSDARG00000100179	100149758	yes	18.1032	0.0265296	0.995243	35.7934	-0.483786	0.692611	no	no
gb:cr929477	ENSDARG00000012649	794669	yes	50.0611	0.991319	0.446718	55.8832	0.749334	0.568906	no	no
gba3	ENSDARG00000031150	553722	no	3.53852	-2.38076	0.318728	3.53963	-2.37996	1
gcn1	ENSDARG00000058419	567890	yes	256.857	0.0611186	0.96981	1465.51	0.541564	0.334362	no	no
gcnt3	ENSDARG00000060471	100332076	yes	12.8944	-0.656305	0.742611	14.5066	-0.81234	0.62389	no	no
gcnt4b	ENSDARG00000077550	798652	yes	9.00061	0.475162	0.926287	8.68142	0.0453074	1	no	no
gdap1l1	ENSDARG00000028628	562163	yes	15.1319	-0.678009	0.762992	18.0234	-0.672529	0.730682	no	no
gdf10b	ENSDARG00000073891	794493	no	22.5617	-2.82995	1.65179e-06	19.0051	-3.02988	1.05719e-06
gdf2	ENSDARG00000059173	563287	no	4.18673	-0.829273	0.840278	4.18589	-0.829885	1
gdf7	ENSDARG00000042784	30642	yes	4.53057	-1.77564	0.4947	32.3037	-0.623085	0.654271	no	no
gdnfb	ENSDARG00000103764	101885082	yes	6.79478	0.585328	0.915905	8.40633	-0.791946	1	no	no
gdpd3b	ENSDARG00000006944	567286	yes	2.8972	-1.47913	0.662472	14.514	-0.919183	0.6031	no	no
gdpd4a	ENSDARG00000102447	100333025	yes	13.5185	-2.50598	0.0306219	26.7434	-1.87929	0.0275559	no	no
gdpd4b	ENSDARG00000079293	571892	yes	220.213	1.87394	0.00351852	467.028	2.14951	5.05144e-05	yes	yes
gemin5	ENSDARG00000079257	799538	yes	133.955	-0.257556	0.822469	162.383	-0.227406	0.787286	no	no
gfi1ab	ENSDARG00000044457	798697	no	29.9458	-0.519822	0.811563	29.3162	-0.528201	0.809949
gfra1b	ENSDARG00000102564	79377	no	8.71325	-0.334534	0.905279	8.3919	-0.388895	1
gfra2a	ENSDARG00000042723	405794	no	8.71422	-0.533943	0.867565	8.70994	-0.534637	1
ggt1l2.2	ENSDARG00000087054	566746	yes							no	no
GGT7	ENSDARG00000115805	101882295	yes	39.523	-1.48575	0.219812	240.691	-1.29543	0.0900499	no	no
ghrhr2	ENSDARG00000099218	100002189	no
ghsrb	ENSDARG00000057117	100332193	yes	5.81416	-1.22133	0.678664	27.1792	-0.276737	0.921203	no	no
GID4	ENSDARG00000079482	497568	yes	24.5234	1.43881	0.361017	59.757	2.07208	0.0893991	no	no
gig2f	ENSDARG00000099735	100536863	no
gig2k	ENSDARG00000103447	100005454	no
gig2l	ENSDARG00000091730	100005504	no
gigyf1a	ENSDARG00000098932	568584	yes	67.4401	0.534941	0.714533	1546.91	0.250656	0.676492	no	no
gipc1	ENSDARG00000104483	445568	yes	1.93607	-3.06033	0.271477	22.9315	-0.243276	0.903783	no	no
gja8a	ENSDARG00000069451	569409	yes	16.8148	-0.602816	0.794569	40.4349	-0.120348	0.960864	no	no
GJD4	ENSDARG00000116895	795763	yes	14.5288	0.168852	0.961875	44.8932	0.625285	0.709212	no	no
GLB1L2	ENSDARG00000034941	799022	yes	0.322679	-5.02757	0.0696403	19.9494	-1.36309	0.465569	no	no
gldc	ENSDARG00000035120	321621	yes	90.2925	-1.37311	0.209019	201.536	-1.24267	0.0552469	no	no
glipr1a	ENSDARG00000045224	108179203	yes	45.6001	1.07821	0.593117	80.4691	0.963563	0.425956	no	no
glra2	ENSDARG00000075012	793646	yes	20.0193	-0.215939	0.929306	27.1077	-0.948269	0.488983	no	no
gls2a	ENSDARG00000069095	100006303	yes				8.69569	-1.93575	0.14716	no	no
glsa	ENSDARG00000062812	564147	yes	16.7735	0.41298	0.852857	1773.2	0.328813	0.548586	no	no
gltpd2	ENSDARG00000067889	565337	yes	16.9988	1.19291	0.742554	28.5725	1.25778	1	no	no
gna14a	ENSDARG00000025013	556160	yes	2.58143	-0.70563	1	17.7927	0.738128	1	no	no
gna15.3	ENSDARG00000056654	100332929	yes							no	no
gna15.4	ENSDARG00000071416	562625	no
gnal	ENSDARG00000045415	492467	yes	77.4219	-0.529841	0.598014	112.331	-0.605624	0.564744	no	no
GNAZ	ENSDARG00000099844	564915	yes	18.9774	-1.26235	0.545043	268.024	-1.13622	0.0552324	no	no
GNB4	ENSDARG00000019278	100332205	yes	16.1857	-0.133062	0.97394	40.3789	0.1212	0.945072	no	no
GNG4	ENSDARG00000111259	101883928	yes				11.6262	-0.530509	1	no	no
gnpat	ENSDARG00000074401	572335	yes	15.1894	0.423648	0.885176	189.605	0.349113	0.635377	no	no
gnrhr1	ENSDARG00000100593	100270672	yes	11.6385	-0.383254	0.891096	14.5268	-0.901267	0.545891	no	no
gnrhr4	ENSDARG00000038116	100001586	yes	8.98847	-0.757971	0.82826	11.2466	-0.945997	0.72571	no	no
golga4	ENSDARG00000075331	559226	yes	215.923	0.254255	0.838209	222.669	0.238305	0.815761	no	no
golim4a	ENSDARG00000106760	100000956	no	138.714	0.612084	0.580068	115.752	0.718071	0.488722
gpaa1	ENSDARG00000074571	555496	yes	27.7123	-0.178856	0.942023	207.586	-0.00828769	0.995201	no	no
gpbar1	ENSDARG00000023302	797190	yes	5.48352	-1.47168	0.665254	5.47986	-1.50297	1	no	no
gpc2	ENSDARG00000104217	503792	no	5.15679	-2.07258	0.449086	8.04366	-1.64993	0.497123
gpc5a	ENSDARG00000103647	559454	no	20.2887	-1.10328	0.354262	20.6144	-1.08003	0.344984
gpc5b	ENSDARG00000024588	101886726	no	4.8485	-1.09321	0.753353	4.84652	-0.901256	1
gpc5c	ENSDARG00000074082	100006305	yes	0.645358	-4.17206	0.137999	7.10505	-2.54139	0.0235944	no	no
gpc6b	ENSDARG00000104219	100331176	no	3.86405	-0.420524	0.944075	3.86346	-0.421333	1
gpr1	ENSDARG00000101366	100004124	yes	3.55897	-1.71029	0.572647	10.3236	-0.758302	1	no	no
gpr101	ENSDARG00000039218	101886313	yes	14.5385	-0.341187	0.887651	18.0908	-0.460208	0.808684	no	no
gpr132a	ENSDARG00000021497	797380	yes	13.2143	0.033105	0.993805	13.2214	-0.372283	1	no	no
gpr142	ENSDARG00000102491	100000501	yes	7.4115	-1.1519	0.685814	13.5079	-0.25878	1	no	no
GPR151	ENSDARG00000104291	497134	yes	8.0265	-2.58467	0.147771	17.3614	-2.29625	0.0821918	no	no
gpr153	ENSDARG00000087601	101883998	yes	21.5588	-0.538295	0.847494	31.5198	-0.774504	0.724483	no	no
gpr158a	ENSDARG00000077134	570001	yes	82.6461	0.270484	0.887151	417.656	0.269	0.81917	no	no
gpr17	ENSDARG00000062030	100331841	yes	9.95246	-0.378561	0.93867	14.4638	-2.20215	0.180318	no	no
gpr18	ENSDARG00000062009	556711	yes	20.6409	0.164817	0.949746	22.2525	-0.493698	0.766251	no	no
GPR180	ENSDARG00000099851	100329381	yes	1.28262	-2.81848	0.443952	3.85209	-2.04019	1	no	no
gpr183b	ENSDARG00000074302	100150688	no	40.1965	2.37387	0.119558	40.2246	2.37466	0.113147
gpr185a	ENSDARG00000060400	100329977	yes	22.0146	0.418025	0.910277	23.2972	0.149813	0.956932	no	no
gpr185b	ENSDARG00000036560	565203	yes	1.61256	-2.9305	0.22376	32.8409	-1.87402	0.119479	no	no
gpr37b	ENSDARG00000033296	568430	no	39.5926	-1.17006	0.215499	39.6052	-1.16981	0.1983
gpr37l1a	ENSDARG00000006079	567161	yes	34.2483	0.235249	0.916426	59.6795	-1.66102	0.0188195	no	no
gpr37l1b	ENSDARG00000056774	567796	yes	10.9955	-1.55492	0.359348	21.2808	-2.28389	0.00145747	no	no
GPR45	ENSDARG00000063357	795372	yes	2.91005	-2.35482	0.351871	18.0894	-0.999055	0.471112	no	no
gpr52	ENSDARG00000093460	101884270	yes	4.82602	-1.93245	0.448049	27.0643	-2.20762	0.0151828	no	no
gpr6	ENSDARG00000052400	100538060	yes	10.3637	0.19488	0.972893	10.3639	-0.456832	1	no	no
gpr61	ENSDARG00000055570	571338	yes	22.8616	-1.15853	0.609477	57.3198	-1.16931	0.549338	no	no
GPR68	ENSDARG00000053711	799203	yes	4.50334	-1.62335	0.538271	9.34207	-1.48322	0.294505	no	no
gpr78b	ENSDARG00000077645	799848	yes	16.1857	-0.0840866	0.986146	20.7134	-1.01134	0.654221	no	no
GPR83	ENSDARG00000058120	100002786	yes	9.38382	0.213679	0.969542	13.8947	0.17667	1	no	no
gpsm1b	ENSDARG00000054874	493623	no	17.3882	-0.571193	0.844036	16.7436	-0.678556	0.785754
gpx7	ENSDARG00000091511	552981	yes	4.19078	-3.54146	0.0233345	31.6072	-1.69578	0.0546423	no	no
gramd1bb	ENSDARG00000074258	100332318	yes	10.6642	-1.39691	0.458505	57.1385	-1.32451	0.0597402	no	no
grb7	ENSDARG00000042726	563649	yes				10.6531	0.518012	1	no	no
grid2ipb	ENSDARG00000095603	559717	yes	40.0547	-0.50653	0.775263	114.157	-0.792126	0.275051	no	no
grik1b	ENSDARG00000040627	561540	yes	17.7372	-1.03039	0.539019	43.7796	-1.05298	0.384469	no	no
GRIN2B	ENSDARG00000079348	110438919	yes	13.5619	-0.877692	0.714181	21.603	-1.24179	0.335677	no	no
grin2db	ENSDARG00000070620	100149482	yes	195.334	-0.605802	0.59185	256.609	-1.03108	0.170386	no	no
grin3a	ENSDARG00000075802	564832	yes	12.2051	-1.33007	0.566289	56.2975	-0.315722	0.839568	no	no
grk3	ENSDARG00000104094	569403	yes	45.5017	-0.12877	0.937996	114.91	0.392621	0.686361	no	no
grk6	ENSDARG00000032157	561288	yes	43.2414	1.60473	0.154256	851.773	0.881616	0.0535068	no	no
grm3	ENSDARG00000031712	565256	yes	31.6512	-0.515141	0.742913	33.5734	-1.27754	0.133862	no	no
grm5b	ENSDARG00000102067	100332913	yes	9.02058	-2.00479	0.122093	9.02395	-2.04232	0.0994387	no	no
gsap	ENSDARG00000045481	100151358	yes	44.4346	0.432946	0.804725	83.7948	0.0667659	0.958513	no	no
GUCY1A2	ENSDARG00000093185	100330875	yes	21.3194	0.13658	0.969836	24.5354	-0.213874	0.93532	no	no
gucy2c	ENSDARG00000014320	572052	yes	4.5069	-1.40614	0.533575	14.1929	-0.670228	0.677346	no	no
gucy2g	ENSDARG00000076776	100333350	yes	12.6284	0.00232805	0.999827	12.3042	-0.74905	0.806847	no	no
gys2	ENSDARG00000004904	373082	yes	20.6028	0.60283	0.780637	22.8402	0.167495	0.959519	no	no
gzm3	ENSDARG00000078451	100000986	no
gzm3.2	ENSDARG00000055986	100001065	yes	5.45924	0.912487	1	6.75686	-0.255235	1	no	no
gzm3.3	ENSDARG00000093990	100001138	no	21.3111	-0.626772	0.741471	21.3153	-0.612148	0.720864
gzm3.4	ENSDARG00000076814	100001210	yes	10.9501	-1.08504	0.570889	10.9557	-1.48378	0.342695	no	no
hapln2	ENSDARG00000003903	558291	yes	4.50941	-0.72115	0.869412	9.01663	-2.99639	0.0296407	no	no
has1	ENSDARG00000042983	403130	yes	8.69803	-2.64242	0.0303249	8.69857	-2.74961	0.0224633	no	no
has3	ENSDARG00000057210	282555	yes	6.76816	-1.47011	0.586513	52.8864	-0.582201	0.59038	no	no
hcar1-3	ENSDARG00000062874	100148539	yes	15.4778	0.936932	0.728799	27.0847	0.067871	0.974016	no	no
hcn1	ENSDARG00000104480	100334297	yes	40.6553	-1.18012	0.293555	72.494	-1.97779	0.00218116	no	no
hcn4	ENSDARG00000061685	557843	yes	13.904	-1.08072	0.615447	19.6985	-1.1152	0.447373	no	no
hcn4l	ENSDARG00000074419	556759	yes	62.7388	-0.602263	0.741359	85.2993	-0.920275	0.40037	no	no
hcrtr2	ENSDARG00000023722	561260	no	0.320656	-5.14607	0.0523194	0.321008	-5.06845	1
heatr5b	ENSDARG00000059116	571772	yes	36.8223	0.216318	0.924107	298.287	0.100174	0.903583	no	no
HECTD4	ENSDARG00000101079	101885095	yes	73.8242	-0.569519	0.62554	82.1619	-0.497719	0.660384	no	no
hecw1b	ENSDARG00000004291	563730	yes	37.387	-0.676303	0.515467	174.874	-1.23162	0.064567	no	no
herc2	ENSDARG00000073841	558479	yes	320.231	0.539033	0.504257	956.328	0.163226	0.789545	no	no
herc4	ENSDARG00000059936	557513	yes	123.173	0.385437	0.883171	124.519	0.411881	0.844885	no	no
hfm1	ENSDARG00000104288	557052	yes	16.4399	-0.930539	0.527039	47.4195	-0.750819	0.399829	no	no
hgfb	ENSDARG00000079076	100334116	yes	29.074	1.32225	0.395037	140.457	1.05763	0.218451	no	no
hipk1a	ENSDARG00000063594	572042	yes	81.0134	0.263241	0.836956	111.385	0.363679	0.727772	no	no
hist1h2a1	ENSDARG00000109458	560309	yes	127.689	0.112538	0.942449	137.029	0.0439204	0.974683	no	no
hist1h2a10	ENSDARG00000112840	100332885	yes	140.731	0.885152	0.321475	70.384	0.886837	0.408845	no	no
hist1h2a3	ENSDARG00000111648	103909881	yes				25.7917	1.9275	0.23427	no	no
hist1h2a3	ENSDARG00000112593	100004768	yes				25.8073	0.110086	0.966948	no	no
hist1h2a3	ENSDARG00000109755	100538134	yes				23.8888	1.62359	0.282339	no	no
hist1h2a3	ENSDARG00000110809	101882533	yes				49.4587	1.17227	0.424809	no	no
hist1h2a4	ENSDARG00000113399	100536331	yes				26.7502	0.143694	0.961747	no	no
hist1h2a5	ENSDARG00000114133	559220	yes	13.5561	0.260771	0.955531	14.1912	-0.243304	1	no	no
hist1h2ba	ENSDARG00000109370	100333496	yes	29.9395	0.365073	0.896304	33.4814	-0.00438983	0.999623	no	no
HIST2H3A	ENSDARG00000114370	100334933	yes	45.2573	1.51779	0.346495	53.6665	1.18831	0.443695	no	no
hivep2b	ENSDARG00000018773	100536055	yes	21.3158	-1.25191	0.335967	24.207	-1.61806	0.0660023	no	no
hlfb	ENSDARG00000061011	557886	yes	14.1718	0.166889	0.962811	228.372	-0.0449296	0.970739	no	no
hmgxb4a	ENSDARG00000075783	559742	yes	40.2316	-1.22896	0.200091	95.7105	-1.02964	0.0783191	no	no
hnrnpa1a	ENSDARG00000011020	393467	yes	17.6995	-0.616023	0.762309	2837.2	0.816762	0.158815	no	no
hnrnpul1l	ENSDARG00000079780	100330645	yes	136.645	-0.913152	0.442754	1984.31	-0.178908	0.787655	no	no
hoga1	ENSDARG00000018944	405806	yes	46.6207	-0.128914	0.951383	64.9992	0.16263	0.918116	no	no
homer2	ENSDARG00000059349	553661	yes	3.21667	-0.385113	1	7.39739	-0.765467	1	no	no
homeza	ENSDARG00000054304	368671	yes	360.678	0.789805	0.534968	918.774	0.963695	0.272478	no	no
hoxc12a	ENSDARG00000070352	562600	yes	5.1783	-0.086478	0.990466	5.17761	-0.246948	1	no	no
HPDL	ENSDARG00000113721	110438534	yes	9.95448	0.14152	0.977512	8.99816	-0.0547619	1	no	no
hpse2	ENSDARG00000078163	562573	yes	6.45855	-1.96491	0.208965	6.77976	-2.44191	0.045007	no	no
hrc	ENSDARG00000063347	102659286	no				0	-4.85625	1
hs3st2	ENSDARG00000059616	571246	no	7.43468	-1.74122	0.405528	7.43172	-1.74175	0.383891
hs3st3b1a	ENSDARG00000099149	767708	yes	9.02881	-1.52076	0.538237	12.2568	-1.65283	0.354238	no	no
hs3st4	ENSDARG00000052648	563570	no	20.877	-1.26077	0.559719	26.0315	-1.23678	0.537734
hs6st1a	ENSDARG00000054754	553162	yes	355.549	-0.130197	0.921675	883.64	0.442903	0.40132	no	no
hs6st1b	ENSDARG00000071501	791107	no	91.5315	-0.119997	0.926139	91.5387	-0.114973	0.914376
hs6st3a	ENSDARG00000071217	792524	yes	6.14907	-0.997967	0.762946	6.14924	-1.6324	1	no	no
hs6st3b	ENSDARG00000069500	569353	no	2.90921	-1.73705	0.513123	2.90909	-1.73712	1
hsd11b1lb	ENSDARG00000110341	100333777	yes	4.20705	1.69857	1	4.20746	0.531103	1	no	no
hsd17b4	ENSDARG00000101239	393105	yes	99.3979	-0.0100588	0.995789	324.618	0.0679062	0.939681	no	no
hspb3	ENSDARG00000067714	568180	yes				2.257	-1.71882	1	no	no
hspg2	ENSDARG00000076564	565429	yes	1099.87	1.26448	0.0289271	5030.44	1.35683	0.00162435	yes	yes
htr1fb	ENSDARG00000053580	100004819	yes	1.93607	-2.58774	0.4359	6.12614	-1.8851	1	no	no
htr2aa	ENSDARG00000057029	560808	yes	3.87452	-2.36977	0.278897	7.09347	-2.18694	0.184264	no	no
htr2ab	ENSDARG00000058165	559806	yes	2.25673	-2.75144	0.268471	41.6327	-0.0989547	0.950304	no	no
htr2cl2	ENSDARG00000013210	798599	yes	1.93321	-1.8106	0.647405	1.93317	-2.77597	1	no	no
HTR7	ENSDARG00000099854	100536080	yes	14.5576	0.245998	0.945675	17.1265	-0.841722	0.665601	no	no
htr7c	ENSDARG00000095272	572143	yes	31.9299	0.200709	0.916833	36.4454	-0.226756	0.87915	no	no
HTRA3	ENSDARG00000010925	573378	yes	0	-7.76707	5.95846e-06	18.7773	-3.39651	0.0207981	no	no
hunk	ENSDARG00000091317	564235	yes	8.36858	-1.94963	0.252556	530.041	-0.19889	0.779247	no	no
HUS1B	ENSDARG00000101611	100037341	yes	85.4396	0.950632	0.264764	118.02	0.960577	0.220296	no	no
ibtk	ENSDARG00000074424	572463	yes	159.662	0.151531	0.886286	366.632	0.240084	0.739804	no	no
ido1	ENSDARG00000033594	571967	yes	9.03501	1.63402	0.763699	9.028	0.344163	1	no	no
iffo2a	ENSDARG00000062101	100150502	yes	4.50334	-0.520709	0.904604	14.5167	-0.369153	0.868114	no	no
iffo2b	ENSDARG00000102911	100534822	yes	10.0175	-1.23583	0.493021	19.031	-0.595844	0.710177	no	no
ifit12	ENSDARG00000090977	567504	no	18.7335	0.728568	0.728169	21.9586	0.957804	0.563064
ifit14	ENSDARG00000071012	794786	no	6.42727	-0.00804327	0.999827	6.4301	-0.00796262	1
ifng1r	ENSDARG00000045671	553965	no	3.84787	2.58074	1	4.1731	2.69726	1
ifnphi2	ENSDARG00000069012	100126802	yes							no	no
ift74	ENSDARG00000023495	436658	yes	238.4	-0.00902954	0.994332	451.109	0.271383	0.744178	no	no
ighv2-1	ENSDARG00000096406	100535575	no
ighv5-3	ENSDARG00000096388	100535958	no	3.54947	1.86851	1	5.80371	1.84167	1
igl3v2	ENSDARG00000113944	797398	yes	17.1531	1.20754	0.698761	28.1437	1.74155	0.411779	no	no
igsf11	ENSDARG00000109783	100004469	no	6.79324	-0.854591	0.804405	6.79266	-0.855229	1
igsf9b	ENSDARG00000010408	553348	yes	46.7538	-1.40824	0.0742895	245.541	-1.83729	0.00796933	no	no
igsf9bb	ENSDARG00000069467	569554	yes	17.4255	-1.48426	0.256936	40.5996	-1.08107	0.232394	no	no
ikzf4	ENSDARG00000037068	566844	yes	52.2299	0.00753707	0.997386	154.655	-0.633541	0.35892	no	no
il11a	ENSDARG00000037859	570404	yes	60.5804	3.15697	0.0336711	2233.24	3.59159	0.000582702	yes	yes
il11b	ENSDARG00000058557	108180095	yes	322.318	1.86959	0.632327	579.45	1.612	0.25409	no	no
il12rb2	ENSDARG00000052157	100134971	yes	10.3014	0.0400258	0.993506	65.341	0.802736	0.588435	no	no
il12rb2l	ENSDARG00000074850	110437721	yes	146.823	0.194932	0.903853	185.154	0.317581	0.802235	no	no
il17d	ENSDARG00000010700	553961	no	9.31031	-0.434549	0.896304	9.95978	-0.695834	1
il17rel	ENSDARG00000089131	100331195	yes	7.07668	-0.299046	0.944272	16.1118	-0.288064	0.879653	no	no
il1rapl1b	ENSDARG00000104853	557801	no	1.93405	-2.50707	0.396942	1.93315	-2.50789	1
il1rapl2	ENSDARG00000037553	100149452	yes	13.1853	-0.29429	0.937462	37.3523	0.0854521	0.963242	no	no
il21r.2	ENSDARG00000078649	100134975	yes				4.1731	-1.21611	1	no	no
il22	ENSDARG00000045673	553964	no	5.15881	-0.525328	0.903787	5.15601	-0.526198	1
il2rga	ENSDARG00000068858	796604	no
il6	ENSDARG00000102318	100885851	no	0.961967	-2.94718	0.432287	0.963023	-2.94577	1
illr2	ENSDARG00000094882	100147856	no
im:7142702	ENSDARG00000116556	100330974	yes	20.0061	-0.942406	0.461034	26.4398	-0.912547	0.399099	no	no
im:7143333	ENSDARG00000096948	561230	yes				33.4587	-0.731057	0.706781	no	no
im:7151449	ENSDARG00000086724	492708	yes	72.4791	0.0369092	0.984801	127.329	0.381294	0.660364	no	no
im:7160594	ENSDARG00000070957	100003326	yes	13.1827	-0.800004	0.735909	249.623	0.473337	0.490589	no	no
impa2	ENSDARG00000059411	553595	yes	31.604	-0.68106	0.608043	131.803	-0.81458	0.287083	no	no
impact	ENSDARG00000043288	449553	yes	65.3655	-0.274764	0.82826	167.024	0.18633	0.833838	no	no
inha	ENSDARG00000052433	570520	no	0	-5.61612	0.0987675	0	-5.61636	1
INHBC	ENSDARG00000100986	100329520	yes	4.20705	-1.81997	0.523513	9.70605	-0.997495	1	no	no
ino80da	ENSDARG00000104727	110440037	yes	149.814	0.398166	0.728036	334.995	0.312727	0.672608	no	no
inpp5d	ENSDARG00000074283	559103	yes	269.042	2.20466	0.000282929	833.76	2.62298	3.51881e-05	yes	yes
inpp5f	ENSDARG00000061437	570007	yes	8.6921	-0.058388	0.99238	632.293	0.468404	0.394767	no	no
inpp5ja	ENSDARG00000078542	569568	yes				7.76425	-1.46023	1	no	no
inpp5jb	ENSDARG00000093359	100317089	yes	16.7587	-0.0033818	0.999827	26.0787	-0.720343	0.588038	no	no
insig2	ENSDARG00000113367	399645	yes	4.50453	-1.40805	0.579142	8.38618	-1.27901	1	no	no
INSM2	ENSDARG00000020655	792891	yes	10.6282	-0.421409	0.910915	274.293	1.90928	0.00155554	no	yes
ints4	ENSDARG00000102953	564681	yes	21.5861	-0.75768	0.586649	56.7331	-0.363702	0.726631	no	no
ipmka	ENSDARG00000076699	100151036	yes				3.86488	-0.878752	1	no	no
ipo13	ENSDARG00000060618	100319138	yes	44.4799	0.0181817	0.992677	476.493	0.0315166	0.967076	no	no
iqgap3	ENSDARG00000098650	100537977	no	212.707	0.2967	0.80106	212.761	0.297419	0.772479
iqsec2a	ENSDARG00000102125	560461	yes	206.432	1.01307	0.172953	474.14	0.779508	0.175791	no	no
iqsec3b	ENSDARG00000093091	555340	yes	45.0718	-0.38448	0.808257	71.1381	-0.701735	0.528989	no	no
irf2bp2a	ENSDARG00000004702	335866	yes	41.2532	-0.254967	0.931554	3442.29	0.944145	0.048785	no	no
irf3	ENSDARG00000076251	564854	yes	10.9726	0.0427665	0.991394	25.7592	0.460366	0.785754	no	no
ism2b	ENSDARG00000053859	553163	no	15.8456	0.1563	0.961733	15.8438	0.156356	1
itfg1	ENSDARG00000075584	100331534	yes	17.0962	-0.541456	0.760271	234.494	-0.400492	0.683827	no	no
itga2.2	ENSDARG00000062974	100536533	yes	10.637	-0.89029	0.698256	19.0177	-0.612561	0.774864	no	no
itga4	ENSDARG00000103056	100331333	yes	259.413	3.74262	3.54368e-11	784.89	4.02794	2.88281e-14	yes	yes
itgb1b	ENSDARG00000104484	570216	no	1729.05	2.64611	6.56472e-12	1725.86	2.64525	2.66161e-12
itpr2	ENSDARG00000011909	562585	yes	64.8539	0.420933	0.747958	431.801	0.580907	0.376665	no	no
jac2	ENSDARG00000056166	566745	yes	2.24459	-2.52475	0.427279	3.21434	-2.32834	1	no	no
jade2	ENSDARG00000053389	569359	yes	38.7916	0.514465	0.810703	55.2224	0.474637	0.726541	no	no
jag2a	ENSDARG00000014246	566455	yes	19.6571	0.172617	0.963556	390.565	2.61738	6.8623e-06	no	yes
jarid2b	ENSDARG00000062268	558456	yes	131.488	-0.188262	0.887796	501.072	-0.00556121	0.995475	no	no
JMJD8	ENSDARG00000104841	100330060	yes	6.12685	1.66004	1	6.76532	-0.00355014	1	no	no
jupb	ENSDARG00000059067	100330886	yes	13.5512	-0.195975	0.945964	51.5777	0.604541	0.681972	no	no
kalrna	ENSDARG00000104119	100148988	yes	108.698	-0.235665	0.858857	168.835	-0.846475	0.225651	no	no
kat2a	ENSDARG00000104734	555517	yes	50.5137	0.0903041	0.965623	67.0438	0.528643	0.591905	no	no
katnal2	ENSDARG00000012275	641431	yes	7.38317	0.608233	0.888782	10.2836	-0.255603	1	no	no
kbtbd11	ENSDARG00000104958	557467	yes	6.45358	-2.14008	0.44513	425.108	-0.0220137	0.983438	no	no
kbtbd13	ENSDARG00000076449	797244	yes	0.645358	-4.39676	0.113467	44.9836	1.09661	0.618508	no	no
kbtbd7	ENSDARG00000078001	794299	yes	5.13453	-1.68271	0.555228	13.2228	-0.894031	0.584164	no	no
kcna2a	ENSDARG00000002241	100537815	yes	4.52463	-1.77945	0.513801	6.1348	-2.33885	0.20041	no	no
kcna7	ENSDARG00000086571	572481	yes	5.46935	-1.31194	0.739789	8.03798	-1.17126	1	no	no
kcnb1	ENSDARG00000060095	555284	yes	24.2501	-0.737244	0.713637	33.9059	-0.973059	0.356049	no	no
KCNB2	ENSDARG00000088842	566883	yes	9.69735	-1.93896	0.228963	19.0738	-1.81718	0.151495	no	no
kcnc1b	ENSDARG00000032959	100334453	yes	9.68248	-2.24336	0.0381079	31.3307	-1.22044	0.257196	no	no
kcnc3a	ENSDARG00000055855	559096	yes	29.0254	-0.679859	0.649553	541.499	-1.83261	0.0285476	no	no
kcnc3b	ENSDARG00000098816	564371	yes	20.5948	-0.465408	0.887629	68.2559	-0.697529	0.557127	no	no
kcnc4	ENSDARG00000061288	799410	no	27.4407	0.948901	0.599982	27.4326	0.948362	0.569801
kcnd1	ENSDARG00000074746	100001681	yes	14.1537	-1.85059	0.179612	50.4949	-1.6471	0.218381	no	no
kcnf1b	ENSDARG00000027285	100334378	yes	3.22679	-2.7018	0.305356	9.66575	-2.02673	0.295194	no	no
kcng2	ENSDARG00000035961	562421	yes	9.37418	-1.00109	0.674214	25.2174	-0.298597	0.879998	no	no
kcng4b	ENSDARG00000051892	566228	yes	31.5355	-0.381333	0.902486	38.619	-0.413027	0.871793	no	no
kcnh1a	ENSDARG00000023236	101154640	yes				18.4434	-0.521761	0.830834	no	no
kcnh3	ENSDARG00000069560	100006614	yes	23.5995	0.0806708	0.984528	32.2706	-0.301674	0.857898	no	no
kcnh5b	ENSDARG00000069117	100331767	yes	29.4463	0.42281	0.876577	32.0259	-0.239205	0.915037	no	no
kcnh7	ENSDARG00000062687	560289	yes	34.1118	-1.12173	0.303542	38.3226	-1.5563	0.0420988	no	no
kcnip2	ENSDARG00000075846	100003947	yes				4.19157	-1.65914	1	no	no
KCNIP4	ENSDARG00000088100	100536963	yes	3.85798	-1.5073	0.612527	11.2594	-2.16995	0.16936	no	no
kcnj10a	ENSDARG00000090815	100538267	yes	4.5175	-2.36405	0.39426	9.65012	-2.97444	0.022911	no	no
kcnj11	ENSDARG00000051880	664687	no	5.1487	-2.02648	0.327313	5.14891	-2.02642	1
KCNJ15	ENSDARG00000058988	572476	yes	7.39126	0.606507	0.905125	20.9396	0.434734	0.823549	no	no
kcnj16	ENSDARG00000045039	100001432	yes	5.15274	-0.398644	0.942537	6.44724	-1.0402	1	no	no
kcnj1a.3	ENSDARG00000086248	569137	yes	9.33649	-0.396151	0.904344	9.98693	-0.665077	1	no	no
kcnj1a.4	ENSDARG00000090635	569191	yes	7.43503	-1.28137	0.560701	9.69161	-0.949159	1	no	no
kcnj1a.5	ENSDARG00000089060	568823	yes	5.17307	-2.99852	0.0299541	11.6235	-3.6295	4.47346e-05	no	no
kcnj2a	ENSDARG00000019418	564522	yes	26.2252	1.01998	0.733178	337.922	0.703056	0.171051	no	no
kcnj2b	ENSDARG00000104389	563744	yes	7.11675	-1.1246	0.713637	7.11506	-1.86137	0.37391	no	no
kcnj3a	ENSDARG00000077165	100330491	yes	4.17257	-3.58463	0.0225149	12.5236	-3.28114	0.0372089	no	no
KCNJ6	ENSDARG00000058985	569498	yes	22.3175	1.20216	0.712248	124.329	0.249526	0.844272	no	no
kcnj8	ENSDARG00000045589	561090	no	1.61339	-2.63409	0.44016	1.61214	-2.63515	1
kcnj9	ENSDARG00000061636	100334285	yes	2.24661	-2.28779	0.423286	9.97976	-1.96919	0.0915716	no	no
kcnk12l	ENSDARG00000057037	564796	yes	3.5434	-2.07048	0.558718	10.9498	-1.44257	0.553995	no	no
kcnk13b	ENSDARG00000043557	556073	no	13.5689	0.865572	0.793874	13.5681	0.865385	1
kcnk18	ENSDARG00000057049	561821	no	4.19029	-0.949041	0.787844	4.19021	-0.890587	1
kcnk3a	ENSDARG00000043466	561866	no	3.87215	-0.741916	0.896304	3.86914	-0.743477	1
kcnk9	ENSDARG00000104563	799704	no	8.72073	-1.47584	0.494567	8.39916	-1.05655	1
KCNN2	ENSDARG00000014939	564698	yes	27.7781	0.567303	0.783485	36.4395	0.0759379	0.962336	no	no
kcnq4	ENSDARG00000089490	101887046	no	0.641311	-3.76332	0.25465	0.642015	-4.17721	1
kcnq5a	ENSDARG00000069954	556841	yes	46.8033	-0.520643	0.651575	50.6697	-0.467285	0.645507	no	no
kcnt1	ENSDARG00000079484	100004419	yes	0	-6.61392	0.00557031	0	-6.81334	1	no	no
kctd6a	ENSDARG00000043095	100008047	yes	12.5636	-0.110999	0.970394	32.1947	-0.754868	0.634781	no	no
KIAA0895L	ENSDARG00000059529	562097	yes	197.784	1.47809	0.0136375	481.725	1.43415	0.00469264	yes	yes
kif13bb	ENSDARG00000073859	100317281	yes	28.3777	-1.19352	0.185803	56.386	-1.24479	0.0543184	no	no
kif1ab	ENSDARG00000062024	566766	yes	49.6399	-0.978736	0.260744	382.743	-2.04527	0.0125989	no	no
kif21b	ENSDARG00000009733	570502	yes	104.591	0.638015	0.651285	104.933	0.529139	0.685753	no	no
kif3ca	ENSDARG00000017162	100333558	yes	66.2113	0.481448	0.779276	88.463	0.655509	0.574691	no	no
kif5ab	ENSDARG00000059818	799274	yes	32.6894	0.662104	0.800288	46.2833	0.639519	0.769583	no	no
kif5ba	ENSDARG00000074131	563459	yes	662.263	-0.184285	0.855482	1790.21	0.737548	0.0634942	no	no
kif5c	ENSDARG00000076027	565563	yes	14.1929	-1.89022	0.156597	14.829	-2.36852	0.0423796	no	no
kiss1ra	ENSDARG00000002728	561898	no	0	-5.61302	0.0872479	0	-5.61287	1
klb	ENSDARG00000076294	796269	yes	12.5981	-1.0026	0.632686	13.2399	-1.10489	0.535519	no	no
klc1a	ENSDARG00000009796	393928	yes	38.9884	0.214591	0.901943	249.906	-1.35054	0.0266218	no	no
klf4	ENSDARG00000079922	562155	yes	221.564	1.67914	0.088845	224.137	1.73025	0.0982414	no	no
klf5b	ENSDARG00000062106	560043	yes	12.6164	-0.0717948	0.986336	22.6566	-0.154724	0.95795	no	no
klhl10a	ENSDARG00000005814	100333629	yes	15.5325	-0.0272707	0.994929	8.08091	-0.909476	1	no	no
klhl14	ENSDARG00000045275	794722	yes	7.75604	-1.06131	0.687738	19.6415	-2.21204	0.0146408	no	no
klhl23	ENSDARG00000078475	559613	yes	16.097	-1.48057	0.463184	34.1495	-1.4948	0.050956	no	no
klhl35	ENSDARG00000063577	570873	yes	27.7828	0.27605	0.907317	227.503	1.00947	0.112694	no	no
klhl38a	ENSDARG00000031383	559083	yes	7.75023	-0.548207	0.908459	42.3451	0.605942	0.752404	no	no
klhl38b	ENSDARG00000040278	563341	yes	3.86001	-2.007	0.422904	3.86062	-2.06591	1	no	no
klhl43	ENSDARG00000053803	570492	yes	5.81759	-1.73741	0.382649	17.7785	-1.77969	0.133241	no	no
kntc1	ENSDARG00000101670	497376	yes	466.55	0.194083	0.878522	602.529	0.206161	0.820378	no	no
ksr1a	ENSDARG00000068714	100150814	yes	17.0312	-1.29109	0.552311	24.7645	-1.19937	0.544462	no	no
ky	ENSDARG00000074036	795191	yes	19.667	-0.22264	0.918809	39.0462	-0.710459	0.474285	no	no
l3hypdh	ENSDARG00000103763	565785	yes	5.47542	-1.40996	0.625509	129.608	0.464475	0.639281	no	no
lamb1a	ENSDARG00000101209	286830	no	1253.54	0.256913	0.765209	1254.39	0.259441	0.729693
lamb2	ENSDARG00000002084	337767	yes	32.51	-1.28444	0.438645	165.085	-1.20941	0.0186751	no	no
larp1	ENSDARG00000101722	327175	yes	31.8814	-0.233592	0.910915	697.297	0.705964	0.186244	no	no
lars2	ENSDARG00000075337	100126021	no	12.2135	-0.641983	0.800937	12.5436	-0.603321	1
larsa	ENSDARG00000090988	110440055	no	16.7966	1.79424	0.395759	22.6265	2.13048	1
layna	ENSDARG00000035169	564995	yes	0.968036	-3.27182	0.326109	1.93457	-2.2727	1	no	no
lbh	ENSDARG00000111701	393492	yes				220.593	1.11447	0.116549	no	no
lcat	ENSDARG00000099424	793137	yes	8.67591	0.163106	0.972809	8.68	0.105046	1	no	no
lct	ENSDARG00000060671	559107	yes	20.0161	-0.617136	0.72327	24.2129	-0.326655	0.843241	no	no
ldlrad4b	ENSDARG00000054941	556780	yes	4.83816	-1.38074	0.678069	125.767	-0.592122	0.385523	no	no
lepa	ENSDARG00000091085	100150233	yes	54.224	-1.31761	0.477559	78.3942	-1.13046	0.341687	no	no
lgals8b	ENSDARG00000037613	100334749	yes				2.59097	-1.52293	1	no	no
lgalslb	ENSDARG00000055525	368889	no	3.22476	-1.20414	0.765209	3.22286	-1.20521	1
lgi2a	ENSDARG00000111069	654827	yes	12.276	-0.00174393	0.999827	7.75559	-0.460341	1	no	no
lhfpl4a	ENSDARG00000111810	100151593	yes	29.0342	-0.139897	0.957235	95.149	-0.488262	0.651056	no	no
lhx8b	ENSDARG00000042145	799481	yes				2.56806	-2.29309	1	no	no
limk1b	ENSDARG00000003022	101883214	yes	48.006	2.04474	0.0714277	58.961	2.08519	0.0547066	no	no
lin28b	ENSDARG00000052511	103752590	yes	1.93	-3.17617	0.174504	57.7977	-0.609634	0.575704	no	no
lingo1a	ENSDARG00000034165	564943	yes	16.38	-2.47497	0.0679939	22.843	-2.73499	0.00275407	no	no
lingo3a	ENSDARG00000061970	567293	yes	4.50132	-1.92912	0.470336	246.721	0.177839	0.836839	no	no
lipcb	ENSDARG00000090486	110438373	yes	17.7487	1.87403	0.265558	57.4911	1.11874	0.316071	no	no
lix1	ENSDARG00000052154	558010	yes	11.0039	-1.99644	0.288122	11.6465	-2.10336	0.193349	no	no
lman2la	ENSDARG00000102657	403038	yes	41.7784	-0.636419	0.721816	102.803	-0.565221	0.465775	no	no
lmf1	ENSDARG00000102861	100333693	yes	59.8681	-0.836329	0.413364	203.729	-0.182369	0.811456	no	no
lmln	ENSDARG00000061265	560606	yes	5.79155	-0.744088	0.814039	13.8661	-1.08525	0.474298	no	no
lmod2a	ENSDARG00000045634	447877	yes	13.2785	1.11114	0.807295	20.0699	0.173205	0.961078	no	no
lmod2b	ENSDARG00000045864	664708	yes	2.25875	-3.15051	0.226525	5.47986	-2.85972	0.149128	no	no
lnpa	ENSDARG00000115902	326761	yes				333.627	-0.034733	0.971943	no	no
LO017650.1	ENSDARG00000103903	100534755	yes	22.9359	-1.32524	0.240953	23.2526	-2.30037	0.00890966	no	no
LO017700.1	ENSDARG00000073822	100334106	yes	50.3618	0.42601	0.790636	57.1081	-0.0804027	0.953757	no	no
LO017784.1	ENSDARG00000105295	108190731	yes	119.167	-1.2268	0.0243473	190.92	-0.902881	0.0875761	no	no
LO017791.1	ENSDARG00000115189	110440145	yes	4.17055	-1.59499	0.620786	13.2171	-1.50262	0.284215	no	no
LO017799.1	ENSDARG00000115962	110439798	yes	0.320656	-4.14941	1	78.6426	-0.398007	0.667612	no	no
LO017835.1	ENSDARG00000109769	569441	yes	21.6376	0.509447	0.82289	919.512	-0.116682	0.887252	no	no
LO017843.1	ENSDARG00000103139	100334962	yes	3.22274	-1.26926	0.758366	6.11762	-1.86668	1	no	no
LO017849.1	ENSDARG00000099098	564281	yes	4.21027	-0.998187	0.83091	7.43319	-1.43031	1	no	no
LO017850.1	ENSDARG00000102050	100001113	yes	25.4839	0.979813	0.520309	26.1028	0.693353	0.672608	no	no
LO017872.1	ENSDARG00000113801	101886260	yes	18.4033	0.832561	0.674234	424.251	0.95505	0.162301	no	no
LO018020.2	ENSDARG00000115153	795264	yes	49.8351	0.173842	0.95908	112.4	0.756294	0.469165	no	no
LO018102.1	ENSDARG00000079790	794598	yes	19.7335	1.47454	0.516226	1298.82	0.585752	0.266316	no	no
LO018176.1	ENSDARG00000104493	100333881	yes	64.5498	1.85982	0.0839427	163.5	1.012	0.11513	no	no
LO018188.1	ENSDARG00000106873	100536545	yes	620.876	0.407168	0.776552	631.386	0.400393	0.750843	no	no
LO018197.1	ENSDARG00000020891	792889	yes	7.41612	-0.968667	0.651249	302.203	-0.108635	0.883767	no	no
LO018208.1	ENSDARG00000107431	100534777	yes	1.6053	-2.14011	0.594702	2.56948	-1.81129	1	no	no
LO018231.1	ENSDARG00000105048	101885590	yes	2.57738	-2.64799	0.239901	3.22144	-3.15723	0.0675311	no	no
LO018260.2	ENSDARG00000105739	101883187	no				1.2926	-2.17295	1
LO018303.1	ENSDARG00000077715	100334689	yes	12.54	-1.73438	0.408411	12.8659	-1.78454	0.369168	no	no
LO018309.1	ENSDARG00000056909	571431	yes	4.1928	-0.473469	0.926491	5.47418	-0.671991	1	no	no
LO018340.1	ENSDARG00000063407	100333903	yes	48.7604	0.18237	0.921675	64.5757	0.566006	0.668019	no	no
LO018380.1	ENSDARG00000041086	101886560	yes	4.48918	-1.84813	0.589974	14.1442	-2.86768	0.0359743	no	no
LO018474.1	ENSDARG00000104306	568531	yes	60.8468	-0.281319	0.833691	321.065	-0.00952825	0.992236	no	no
LO018490.1	ENSDARG00000115832	568800	yes	4.52107	-0.098274	0.987229	10.3107	-0.0477387	1	no	no
LO018513.1	ENSDARG00000059081	100002503	yes	2.90209	-2.32477	0.378119	25.5254	-0.122	0.952441	no	no
LO018568.1	ENSDARG00000099181	798522	yes	0.320656	-3.98854	1	10.0285	-0.826267	1	no	no
loxl2a	ENSDARG00000044010	565508	yes	67.5643	0.490481	0.811078	594.318	-0.214658	0.757972	no	no
loxl3a	ENSDARG00000076306	568839	yes	14.1896	-1.85561	0.174436	20.9466	-2.91622	0.00376616	no	no
lpxn	ENSDARG00000079315	560743	yes	88.9863	2.2744	0.0819143	173.499	1.79386	0.0258524	no	yes
lrch2	ENSDARG00000075580	100150488	yes	16.1234	-0.569504	0.771909	29.0191	-0.454617	0.754388	no	no
lrfn4a	ENSDARG00000055132	101882983	yes	31.3105	-0.469079	0.80946	56.0724	-1.41181	0.0628956	no	no
lrfn4b	ENSDARG00000078078	110437730	yes	35.426	-1.62253	0.0936934	94.0664	-2.00448	0.00284065	no	no
lrfn5a	ENSDARG00000071230	100144400	yes	27.4944	-0.911555	0.628592	33.9375	-1.26818	0.277223	no	no
lrig3	ENSDARG00000079363	564554	yes	16.4683	-0.328746	0.898426	117.443	-0.306425	0.738424	no	no
lrit1b	ENSDARG00000099406	553432	yes	47.6948	-2.68958	0.00593923	92.1042	-3.0255	0.00163324	no	no
lrit3b	ENSDARG00000057054	100144406	yes	8.4134	-0.343986	0.946689	8.40913	-0.69221	1	no	no
lrp1ba	ENSDARG00000004789	565136	yes	54.1993	-0.523033	0.64741	88.9852	-1.18871	0.0332691	no	no
lrp1bb	ENSDARG00000061517	559293	yes	40.0067	-2.00394	0.00115961	49.6395	-2.29044	2.25244e-05	no	no
lrp6	ENSDARG00000100143	100003877	no	41.0051	0.27418	0.874406	47.7632	0.110206	0.946014
lrrc14b	ENSDARG00000060788	566643	no	28.0569	-0.951113	0.35061	24.187	-1.08558	0.258154
lrrc18a	ENSDARG00000078790	101885955	yes				4.18305	-1.43445	1	no	no
lrrc18b	ENSDARG00000076236	568967	yes	9.00668	0.0997952	0.983783	13.8576	-0.385997	0.857547	no	no
lrrc24	ENSDARG00000101704	565790	yes	15.8312	-0.537101	0.822432	12.2597	-1.3256	0.383282	no	no
lrrc3	ENSDARG00000078415	100001372	yes	1.28583	-3.25667	0.272927	11.9087	-0.752144	0.741361	no	no
lrrc32	ENSDARG00000040621	100148867	yes	38.7207	0.713962	0.671419	53.5575	0.430098	0.760057	no	no
lrrc38a	ENSDARG00000075147	567935	yes	9.30103	-1.03683	0.76675	57.2192	-1.25348	0.349428	no	no
lrrc3cb	ENSDARG00000076186	100144399	yes	5.17236	-0.324259	0.954641	11.9414	0.449452	1	no	no
lrrc4.2	ENSDARG00000003020	566572	yes	20.6866	-0.869085	0.704759	63.5316	-2.12757	0.00739095	no	no
lrrc4bb	ENSDARG00000014792	100535350	yes	27.3909	-0.683419	0.701008	88.2314	-1.08089	0.262302	no	no
lrrc58a	ENSDARG00000076773	100000656	no	6.46545	-0.53537	0.887724	6.46299	-0.485228	1
lrrc74b	ENSDARG00000098365	100005101	yes	11.6544	0.473951	0.906307	11.976	0.212583	1	no	no
lrrc75ba	ENSDARG00000074308	101885211	yes	18.7433	-0.120186	0.968248	60.5051	-2.12167	0.0108801	no	no
lrrc75bb	ENSDARG00000091128	100148888	yes	13.8829	0.138454	0.965878	13.2341	0.145382	1	no	no
lrrc8c	ENSDARG00000099911	571216	yes	181.305	1.52423	0.0594033	1166.41	1.49997	0.000156897	no	yes
lrriq1	ENSDARG00000093781	565257	yes	29.3911	-0.918332	0.473457	34.224	-1.67755	0.0334928	no	no
lrrn3b	ENSDARG00000102702	100535105	yes	9.32734	-3.37382	0.0149192	119.82	-2.88473	4.61542e-08	no	no
lrrtm4l1	ENSDARG00000080015	100000724	yes	8.38156	-1.25754	0.653043	15.4609	-1.18706	0.588975	no	no
lrsam1	ENSDARG00000060683	562066	yes	61.3598	0.638722	0.621629	84.5899	0.598271	0.556879	no	no
lrtm2a	ENSDARG00000045483	557289	yes	16.4215	-0.502928	0.801443	453.488	-1.32846	0.126231	no	no
lrtm2b	ENSDARG00000045811	101887010	yes	23.7386	-0.21344	0.962148	29.8764	-0.516682	0.864705	no	no
LT631684.1	ENSDARG00000108326	557305	yes	7.75045	-0.701401	0.778124	81.9087	-0.203856	0.855618	no	no
ltbp1	ENSDARG00000056922	562072	yes	272.666	0.575902	0.558718	912.599	0.237475	0.771742	no	no
lyst	ENSDARG00000008575	100150726	yes	88.2791	-0.100434	0.941939	239.545	-0.118681	0.915434	no	no
lzts2a	ENSDARG00000074597	570926	yes	160.023	0.39652	0.779654	1295.45	0.832445	0.0726886	no	no
lzts2b	ENSDARG00000077207	100005471	yes	129.4	1.7147	0.0415557	201.099	2.19427	0.0042943	yes	yes
lzts3a	ENSDARG00000098751	795227	yes	20.0562	-0.23355	0.936019	24.8978	-0.539514	0.779039	no	no
mab21l3	ENSDARG00000076013	558164	yes	26.5407	1.23201	0.631258	36.5501	1.36321	0.451882	no	no
macrod2	ENSDARG00000032601	393521	yes	29.3286	-0.0042904	0.999827	451.421	0.858068	0.0911049	no	no
magi1a	ENSDARG00000070145	100319849	yes	55.7508	-0.596237	0.516103	952.487	-0.963936	0.0941985	no	no
magi3a	ENSDARG00000101869	561689	yes	134.051	0.454758	0.654134	1029.24	1.07902	0.0145054	no	yes
magixa	ENSDARG00000025108	796857	yes	50.7524	0.105004	0.96402	295.077	0.552685	0.420576	no	no
mak	ENSDARG00000059287	335339	yes	39.265	-0.606748	0.733413	260.42	-0.502463	0.488218	no	no
malt3	ENSDARG00000068152	571242	yes	25.9933	-0.647334	0.82619	50.1213	-0.429386	0.849543	no	no
mamdc2a	ENSDARG00000098345	556154	yes	14.8947	-2.33209	0.276375	14.8952	-2.38065	0.247684	no	no
MAN1C1	ENSDARG00000067912	101882461	yes	39.6148	1.6527	0.159918	88.6096	0.60746	0.522307	no	no
map2k7	ENSDARG00000008279	560913	no	12.5849	0.076933	0.980983	10.3265	0.0933525	1
map3k10	ENSDARG00000055672	560932	yes	11.9308	-1.79338	0.10226	24.7917	-1.82029	0.0503677	no	no
MAP3K11	ENSDARG00000091521	101886393	yes	90.1459	1.76657	0.0828918	810.216	1.98077	6.72744e-05	no	yes
map3k9	ENSDARG00000013491	560639	yes	3.55541	-2.88178	0.126461	16.7493	-1.69732	0.214078	no	no
map4k4	ENSDARG00000098670	103908625	yes	330.52	-0.0298941	0.98572	4044.61	0.587235	0.234517	no	no
mapk8ip2	ENSDARG00000063157	561262	yes	70.5881	-0.512222	0.677391	52.6076	-0.796907	0.542838	no	no
march11	ENSDARG00000075212	798174	yes	6.11779	-0.925459	0.707375	44.5017	-0.537244	0.579855	no	no
march4	ENSDARG00000056439	562065	no	13.5535	0.92916	0.733405	13.5567	0.929156	1
march7	ENSDARG00000096271	561242	yes				253.038	-1.89017	0.0555571	no	no
mark4a	ENSDARG00000023914	569346	yes	40.65	-0.318896	0.821223	120.925	-0.331567	0.698631	no	no
mast1a	ENSDARG00000027497	796739	yes	94.9289	1.1208	0.331874	152.385	1.10594	0.290713	no	no
mast3a	ENSDARG00000061725	100534685	yes	24.8271	-0.801877	0.507831	387.334	-0.80479	0.223879	no	no
matk	ENSDARG00000074670	567405	yes	10.6749	1.34358	0.712984	10.9958	0.228711	1	no	no
MB21D2	ENSDARG00000077316	556707	yes	3.87215	-1.94167	0.56952	59.7663	0.37055	0.844686	no	no
mblac2	ENSDARG00000059689	563823	no	15.1716	0.694731	0.780718	15.1673	0.694611	1
mboat4	ENSDARG00000052110	795709	yes	1.93607	-2.62773	0.421812	1.93457	-2.74102	1	no	no
mbtd1	ENSDARG00000060868	568340	yes	28.4294	-0.000101763	0.999827	424.804	-0.64001	0.342195	no	no
mcc	ENSDARG00000105237	100537329	yes	1273.75	3.15506	2.34887e-07	1637.44	3.17735	4.9814e-08	yes	yes
mchr2	ENSDARG00000036117	558520	yes	3.86405	-1.27739	0.70051	6.76827	-1.25562	1	no	no
mcm7	ENSDARG00000101180	192333	yes	603.506	-0.162087	0.915668	1381.58	0.199361	0.795049	no	no
mcoln1b	ENSDARG00000058848	795916	yes	10.6259	-1.37014	0.416884	11.9173	-1.27091	0.416363	no	no
mcoln2	ENSDARG00000098918	394123	yes				2.56806	-1.96169	1	no	no
mctp2a	ENSDARG00000001414	562393	yes	56.2023	0.859176	0.550499	98.5238	0.383868	0.763094	no	no
meak7	ENSDARG00000062951	561678	yes	22.1477	0.143151	0.974692	72.9856	-0.378207	0.81475	no	no
mecom	ENSDARG00000060808	497407	yes	141.315	1.17364	0.111944	488.803	1.78876	0.00528226	no	yes
med17	ENSDARG00000006345	567560	yes	13.2066	-0.506438	0.845277	214.045	0.364472	0.62257	no	no
med24	ENSDARG00000099431	323621	yes	132.198	0.164528	0.923047	357.139	0.124099	0.863243	no	no
megf11	ENSDARG00000062686	563468	yes	107.06	1.28512	0.281198	335.441	1.18788	0.248401	no	no
meox2b	ENSDARG00000061818	566969	no	6.8012	-1.94443	0.505248	6.80129	-1.94417	0.482574
mespbb	ENSDARG00000097947	100148845	yes	4.50739	-0.722675	0.860356	4.5069	-0.784299	1	no	no
metap2a	ENSDARG00000069261	794589	no	38.0432	0.815137	0.601162	40.3188	0.943409	0.511567
mettl11b	ENSDARG00000042033	568419	no	0	-5.18475	1	0	-5.18472	1
mettl24	ENSDARG00000075817	100000285	yes	31.2922	-0.478355	0.742052	35.4806	-0.359812	0.797602	no	no
MFAP4	ENSDARG00000089667	100007474	yes				10.9214	-0.82628	1	no	no
MFN1	ENSDARG00000011884	100329462	yes	5.1337	-1.4054	0.747715	38.3141	-2.4895	0.0204329	no	no
mfsd11	ENSDARG00000102828	570782	yes	16.5124	3.67756	0.221444	18.4405	0.83248	1	no	no
mfsd9	ENSDARG00000074728	100150581	yes	7.73369	-0.173859	0.962177	9.02238	-0.839408	1	no	no
mgat3b	ENSDARG00000036619	570828	yes	20.98	-0.566358	0.811176	125.603	0.775391	0.465775	no	no
mgat4c	ENSDARG00000041791	100333333	yes	1.60935	-3.54142	0.076207	6.75688	-2.3955	0.0921626	no	no
MGAT5B	ENSDARG00000115505	101884072	yes	12.9411	0.800396	0.787869	12.9405	0.515673	1	no	no
mhc1lba	ENSDARG00000016227	100150607	yes							no	no
mhc1zka	ENSDARG00000104293	100536229	yes	6.47733	3.33141	1	7.09784	-0.828648	1	no	no
mib2	ENSDARG00000103609	560887	yes	14.5271	-0.680206	0.76544	18.717	-0.938679	0.511954	no	no
mical3a	ENSDARG00000097017	402881	yes	844.338	-0.623464	0.172079	1234.82	-0.758213	0.0535089	no	no
micall1a	ENSDARG00000079811	100149741	yes	46.7027	0.394448	0.787214	78.5979	0.48407	0.703216	no	no
mid1	ENSDARG00000060482	100330952	yes	107.759	0.996464	0.360631	127.693	0.86355	0.379734	no	no
mid2	ENSDARG00000034871	799891	yes	109.503	0.820568	0.345251	1463.36	1.54761	3.73672e-05	no	yes
mkxb	ENSDARG00000114182	556167	no	0.961967	-3.37566	0.274542	0.963023	-3.37477	1
mmp11a	ENSDARG00000026325	563753	yes	15.8295	0.090384	0.975997	18.0879	-0.194102	0.929783	no	no
mmp11b	ENSDARG00000016718	565793	yes	16.4847	0.503218	0.858445	18.7429	-0.14195	0.950304	no	no
mmp15b	ENSDARG00000013072	100332426	yes	123.492	1.01584	0.277363	182.525	1.22378	0.0765005	no	no
mmp17a	ENSDARG00000078915	570076	yes	15.8651	0.448117	0.905127	35.9295	-0.733668	0.729911	no	no
mmp19	ENSDARG00000091557	100536874	yes	0.96399	-3.27837	0.236095	1.93031	-2.3745	1	no	no
MMP23B	ENSDARG00000043079	101882601	yes	12.268	-0.559578	0.817714	35.1642	-1.24839	0.131984	no	no
mmp23bb	ENSDARG00000009825	550589	yes	77.7947	0.267739	0.853074	131.23	-0.48285	0.468716	no	no
mmp25a	ENSDARG00000077290	100001739	yes	105.743	3.54697	4.70446e-06	260.871	4.4861	6.99218e-09	yes	yes
mmp25b	ENSDARG00000010556	100333601	yes	18.6409	1.32513	0.609867	163.976	2.05657	0.00251874	no	yes
mmp28	ENSDARG00000059029	100005670	yes	15.434	-0.881227	0.739789	70.6434	-0.0645885	0.959519	no	no
mogat3a	ENSDARG00000086481	100142647	no	7.38317	-2.38039	0.210144	7.38886	-2.42687	0.183414
mogat3b	ENSDARG00000003635	494083	yes	26.7078	0.643097	0.72327	85.7826	0.58775	0.609511	no	no
mon1ba	ENSDARG00000035686	100149301	yes	6.12791	-0.61288	0.828193	6.75395	-1.13718	1	no	no
morn3	ENSDARG00000021697	550359	yes	5.1531	-0.811255	0.780953	32.2922	0.972885	0.522856	no	no
mov10b.2	ENSDARG00000056065	555950	no	11.6184	0.359676	0.912144	11.6192	0.360183	1
mpeg1.3	ENSDARG00000078569	795504	no	11.9391	0.34984	0.948341	11.9299	0.349509	1
mpp4a	ENSDARG00000058222	100535324	yes	9.30103	-1.90962	0.48241	13.8048	-2.52224	0.24814	no	no
mpp5b	ENSDARG00000004721	100422734	yes	11.6264	-1.49068	0.428646	263.586	-0.291664	0.737216	no	no
mpp7b	ENSDARG00000025168	101882129	yes							no	no
mrap2b	ENSDARG00000103050	101884805	yes				0	-5.44786	1	no	no
mrc1a	ENSDARG00000102100	100286774	yes	472.511	4.2291	4.36334e-07	3120.84	4.88424	1.27827e-11	yes	yes
mrc2	ENSDARG00000078135	100004793	yes	32.32	-0.377784	0.844828	42.9772	-0.467832	0.757023	no	no
mrpl32	ENSDARG00000060489	751730	yes	583.98	0.344511	0.715267	618.48	0.343967	0.678737	no	no
MRPL49	ENSDARG00000075422	558658	yes	137.343	-0.383795	0.780908	200.507	-0.366459	0.727539	no	no
ms4a17a.5	ENSDARG00000097527	108179093	yes				19.7174	0.204353	0.932483	no	no
mst1rb	ENSDARG00000004871	100134855	yes	6.78681	-2.19315	0.133252	6.78693	-2.3223	0.0900097	no	no
mstna	ENSDARG00000042947	445816	yes				5.16897	-0.169696	1	no	no
mt-atp6	ENSDARG00000063911	140519	no	54900.8	-0.820879	0.143594
mt-atp8	ENSDARG00000063910	140520	no	844.585	-1.29458	0.0630379
mt-co1	ENSDARG00000063905	140539	no	123682	-0.273504	0.604943
mt-co2	ENSDARG00000063908	140540	no	161174	0.132903	0.892217
mt-co3	ENSDARG00000063912	140541	no	138171	-0.104139	0.902176
mt-cyb	ENSDARG00000063924	140512	no	39763.5	-0.848714	0.17839
mt-nd1	ENSDARG00000063895	140531	no	22842.1	-0.923355	0.0917282
mt-nd2	ENSDARG00000063899	140532	no	23865.1	-0.660616	0.254068
mt-nd3	ENSDARG00000063914	140533	no	3695.71	0.00757128	0.995039
mt-nd4	ENSDARG00000063917	140534	no	32308.6	-0.637761	0.241431
mt-nd4l	ENSDARG00000063916	140538	no	682.109	-0.71207	0.403167
mt-nd5	ENSDARG00000063921	140535	no	12555.7	-0.984174	0.106794
mt-nd6	ENSDARG00000063922	140536	no	20265.3	-0.146471	0.886353
mtnr1c	ENSDARG00000035609	30661	no	10.6528	-0.601549	0.806548	10.3309	-0.645605	1
mtr	ENSDARG00000104906	378847	yes	31.139	-0.397803	0.875534	254.126	0.0764402	0.943093	no	no
mtss1la	ENSDARG00000028943	560413	yes	199.076	1.99069	0.0038101	3991.24	2.18154	6.22584e-07	yes	yes
mtss1lb	ENSDARG00000087260	564555	yes	595.663	0.170738	0.882025	897.784	0.332905	0.657186	no	no
mvda	ENSDARG00000099336	492781	yes	47.6579	-1.19382	0.342613	65.3854	-0.895091	0.355315	no	no
mxra5b	ENSDARG00000076309	795448	yes	73.3597	-0.799062	0.664098	78.2264	-0.804738	0.655402	no	no
myadml2	ENSDARG00000053953	570494	yes	7.44334	0.354807	0.936019	11.3211	-1.2262	0.560422	no	no
myf6	ENSDARG00000029830	404208	no	10.0236	2.36732	0.48664	9.6974	2.31933	1
myhz1.1	ENSDARG00000102414	100008376	yes	402.593	-1.33775	0.0542019	80.0606	-2.23039	0.0336657	no	no
mylk4a	ENSDARG00000091260	566845	yes	5.4778	-0.239517	0.953828	21.2605	-1.02579	0.513278	no	no
myo16	ENSDARG00000078582	563752	yes	37.0165	-2.0347	0.0200864	107.548	-2.4733	6.16936e-05	no	no
MYO1G	ENSDARG00000036104	571487	yes	55.2973	0.762798	0.670096	89.1302	1.04428	0.386071	no	no
myo1ha	ENSDARG00000061968	556606	yes	7.7256	-0.420996	0.894692	12.2468	-0.884544	0.568415	no	no
myo1hb	ENSDARG00000078603	796782	yes	43.6092	3.49108	0.0116227	504.285	4.32481	6.93231e-09	yes	yes
myo3b	ENSDARG00000006892	564573	yes	7.40648	-2.77688	0.031929	36.7419	-1.88451	0.00380817	no	no
myo5ab	ENSDARG00000025218	565267	yes	34.4913	-0.272817	0.859025	73.4595	-0.0589013	0.961405	no	no
myo7ab	ENSDARG00000044632	556141	yes	50.3987	-0.504316	0.785249	231.204	0.169092	0.892544	no	no
myo9aa	ENSDARG00000076729	100006612	yes	252.744	0.409766	0.68152	1436.49	0.815186	0.0647697	no	no
myofl	ENSDARG00000017128	559066	yes	286.769	1.77851	0.000222222	781.878	2.20131	5.2795e-07	yes	yes
myt1b	ENSDARG00000102879	100536821	yes	127.156	-0.702624	0.409338	750.069	-1.32354	0.129481	no	no
n4bp3	ENSDARG00000060007	101884870	yes	24.9194	0.911535	0.726981	25.5628	0.751309	0.749916	no	no
nab1b	ENSDARG00000040700	564685	yes	23.878	0.478731	0.834691	68.3335	-0.128375	0.9315	no	no
NABP2	ENSDARG00000090976	101882738	yes	2.90209	-2.00439	0.617377	2.90044	-1.4193	1	no	no
nacc1a	ENSDARG00000099164	103910274	yes	18.1218	0.599562	0.844102	480.444	0.243665	0.732485	no	no
nadsyn1	ENSDARG00000101378	798974	no	193.925	0.330454	0.742327	21.8484	0.19578	0.952293
nanos2	ENSDARG00000116802	101885179	no	5.82485	0.58596	0.916745	5.82391	0.586427	1
nansb	ENSDARG00000101164	492779	yes	8.36775	0.60762	0.864899	13.5207	-0.542762	0.812487	no	no
napgb	ENSDARG00000043012	436742	yes	17.9688	-1.78866	0.40703	25.0471	-1.56403	0.467992	no	no
NAV1	ENSDARG00000078011	100536287	yes	171.703	0.371568	0.682549	1517.59	0.443869	0.418473	no	no
ncanb	ENSDARG00000005783	559024	yes	34.5033	-0.926434	0.320508	47.0456	-0.974593	0.292957	no	no
ncdn	ENSDARG00000098544	571005	yes	182.067	-0.136509	0.894402	216.968	0.00920918	0.993405	no	no
NCEH1	ENSDARG00000115549	797436	yes	3.53935	-1.24865	0.735409	22.6034	0.0182793	0.994673	no	no
NCKAP1L	ENSDARG00000075748	556951	yes	136.826	0.695335	0.67772	332.234	1.04605	0.210379	no	no
ndufv2	ENSDARG00000013044	393720	yes	505.957	0.17652	0.864313	652.211	0.233716	0.777388	no	no
nectin4b	ENSDARG00000103148	794920	yes	9.3686	-0.312656	0.919573	47.3291	-1.14217	0.307522	no	no
nek11	ENSDARG00000087564	101883026	yes	1.28667	-3.58956	0.0892792	9.34901	-1.18897	1	no	no
neto2b	ENSDARG00000063293	100034584	yes				11.3052	-0.82698	1	no	no
neto2b	ENSDARG00000112100	110439938	yes	7.71799	-2.48716	0.1125	13.1798	-2.34913	0.120931	no	no
neu3.5	ENSDARG00000096368	100000684	yes	9.98483	-1.15651	0.685656	25.8047	-0.858304	0.544718	no	no
nfat5b	ENSDARG00000102556	555802	yes	35.4921	-0.400669	0.794569	68.0525	-0.406301	0.743529	no	no
nfatc2a	ENSDARG00000100927	100333254	yes	490.806	2.31719	0.000195107	514.767	2.17069	0.000157856	yes	yes
nfic	ENSDARG00000043210	100005568	yes	78.9995	0.297411	0.843292	2614.44	0.416848	0.431818	no	no
nfil3-4	ENSDARG00000092346	100000898	no	6.1309	-0.706727	0.883317	6.44715	-0.766613	1
ninl	ENSDARG00000098414	561921	yes	34.1768	-0.982493	0.404685	126.102	-0.727378	0.385378	no	no
nitr10a	ENSDARG00000087920	794686	yes							no	no
nitr11a	ENSDARG00000100389	558243	no
nitr1b	ENSDARG00000069848	170994	no				13.9049	0.903697	1
nitr1b	ENSDARG00000115144	170995	no				13.1954	0.706513	1
nitr1i	ENSDARG00000033963	60644								no	no
nitr1k	ENSDARG00000110393	60646	yes	12.8987	1.41113	0.622484	17.7497	1.60755	1	no	no
nitr2b	ENSDARG00000000460	60647	yes	0.322679	-4.48195	1	0.967286	-3.05987	1	no	no
nitr3r.1l	ENSDARG00000103866	101885312	yes	23.2697	1.21741	0.658007	23.9044	0.96197	0.709066	no	no
nitr7a	ENSDARG00000036743	494571	no
nkd2a	ENSDARG00000055271	100049175		57.7582	-0.0331261	0.985973				no	no
nkd3	ENSDARG00000013174	100500933	yes				20.6243	-2.66755	9.54448e-05	no	no
nlgn2b	ENSDARG00000079251	100002407	yes	19.0058	-1.01694	0.474583	178.893	-1.68201	0.0485502	no	no
nlgn4xb	ENSDARG00000077761	100147967	yes	11.9324	-1.31668	0.369241	18.0306	-1.88915	0.0480245	no	no
nlrc3	ENSDARG00000103146	110437718	yes	146.98	1.58173	0.114037	262.189	1.49524	0.0493044	no	yes
nlrc3l	ENSDARG00000099936	100538217	yes	22.5708	-0.298582	0.915486	35.1478	0.275218	0.903783	no	no
nmur1a	ENSDARG00000060884	557276	yes	1.93405	-2.27777	0.478399	3.87065	-1.58932	1	no	no
nmur1b	ENSDARG00000003944	569960	yes	3.54863	-1.18802	0.749734	3.54674	-1.40298	1	no	no
nnt2	ENSDARG00000092522	108179934	no	3.54661	-1.58852	0.56952	5.48854	-0.821135	1
nob1	ENSDARG00000016080	557254	yes	54.9081	-0.423897	0.8731	385.218	0.344379	0.593204	no	no
noctb	ENSDARG00000078525	568973	yes	43.5271	0.460007	0.807334	115.586	0.148642	0.906615	no	no
nop14	ENSDARG00000098859	321133	yes	25.4194	-0.144185	0.950571	406.957	0.497172	0.488752	no	no
nots	ENSDARG00000099824	114367	no	15.1897	0.306388	0.930779	15.1904	0.800107	1
notum1a	ENSDARG00000031126	570510	no	14.1812	-0.450956	0.848585	11.6121	-0.259273	1
nox5	ENSDARG00000079773	100149800	yes	44.443	-0.280423	0.893323	48.3078	-0.330144	0.834738	no	no
npbwr2a	ENSDARG00000079423	556532	yes	21.3752	-0.0612825	0.990942	3.56258	-1.9632	1	no	no
npffr1l2	ENSDARG00000062631	570189	yes	4.50132	-2.40779	0.198992	7.71697	-2.12192	0.229603	no	no
NPFFR2	ENSDARG00000033635	560955	yes	8.0642	-1.21788	0.57372	7.42466	-2.07985	0.183277	no	no
npffr2b	ENSDARG00000060702	561565	yes	1.61339	-2.72468	0.403089	1.93317	-4.51617	0.000148238	no	no
nploc4	ENSDARG00000100487	327447	yes	34.4359	-0.840764	0.473794	88.8862	-0.030056	0.982377	no	no
npr2	ENSDARG00000104393	100331745	yes	24.7874	-2.50946	0.000880491	76.3342	-2.28291	7.69964e-06	no	no
nptx2b	ENSDARG00000045164	556906	no	2.90411	-2.32436	0.457019	2.90186	-2.32533	1
nptxrb	ENSDARG00000053375	100005257	yes	11.2712	-1.91069	0.182599	85.5879	-2.40425	0.00123997	no	no
npy1r	ENSDARG00000037411	793668	yes	31.2987	0.575214	0.752092	12.2455	-0.311914	1	no	no
npy2r	ENSDARG00000094763	100003852	yes	3.87333	-1.90685	0.515446	4.8422	-1.79379	1	no	no
npy8br	ENSDARG00000005780	30713	yes	11.6438	0.000614348	0.999827	17.1205	-0.381599	0.876164	no	no
nr0b2b	ENSDARG00000102756	797815	yes	10.6781	-0.0402001	0.993108	10.6762	-0.412901	1	no	no
nr1d4a	ENSDARG00000031161	563150	yes	94.635	-0.0660356	0.980381	358.426	0.325936	0.820554	no	no
nrp1b	ENSDARG00000027290	402973	no	92.9947	2.58289	0.0242153	92.9683	2.58267	0.0237447
nrxn3b	ENSDARG00000062693	570698	yes	295.61	-1.14957	0.136122	584.218	-1.14509	0.157391	no	no
nsd1b	ENSDARG00000060705	564592	yes	140.925	-0.737705	0.240174	166.705	-0.668835	0.24392	no	no
nsd3	ENSDARG00000062765	100006350	yes	270.572	0.103564	0.906828	1290.62	-0.0523836	0.942835	no	no
nsmfa	ENSDARG00000060025	555195	yes	0.96399	-3.41973	0.187333	22.9504	-0.967623	0.54383	no	no
nthl1	ENSDARG00000042881	100008368	yes	131.822	0.378965	0.68335	177.676	0.504732	0.45677	no	no
ntm	ENSDARG00000018065	678534	yes	5.46482	-3.03842	0.0212601	7.39887	-3.64824	0.000748676	no	no
ntsr1	ENSDARG00000077577	569344	yes	9.34555	-0.393595	0.918809	20.3391	-0.483799	0.78331	no	no
nudt13	ENSDARG00000057417	556815	yes	14.1291	-0.569454	0.855237	19.9309	-0.723137	0.763104	no	no
nup160	ENSDARG00000027140	393635	no	54.3004	-0.223283	0.925615	54.3359	-0.215124	0.915037
nup188	ENSDARG00000030022	559225	yes	435.442	0.332196	0.753599	997.442	0.615372	0.214292	no	no
nxph2a	ENSDARG00000063224	570003	yes	12.9091	-0.635419	0.768063	32.5517	-1.82284	0.0392505	no	no
nxph3	ENSDARG00000070694	563017	yes	4.51165	-1.44443	0.627059	42.5125	-2.04281	0.0454906	no	no
oafa	ENSDARG00000075851	571744	yes	3.54947	-2.32366	0.436987	6.44573	-2.28355	0.296841	no	no
oafb	ENSDARG00000077107	571743	yes	8.69007	-0.202071	0.961922	13.2241	-0.526717	0.758919	no	no
oatx	ENSDARG00000019713	555218	yes				53.7635	0.652761	0.669782	no	no
oca2	ENSDARG00000061303	567419	yes	55.3543	0.421203	0.799435	104.946	0.106389	0.9462	no	no
oct2	ENSDARG00000058775	797890	yes	30.0312	1.07798	0.558718	33.5848	0.529877	0.741163	no	no
ogfod2	ENSDARG00000056211	790923	yes	38.9511	-0.388922	0.890202	46.9978	-0.514204	0.824846	no	no
olfcd1	ENSDARG00000008095	795062	yes	13.9014	-0.0325254	0.99345	23.9349	0.211047	0.939052	no	no
olfcg1	ENSDARG00000104552	100147940	yes				2.9134	-2.07968	1	no	no
olfcg4	ENSDARG00000099773	100148438	no	2.90411	-3.29121	0.16748	2.90186	-3.29252	1
olfcg5	ENSDARG00000102459	100004890	yes	7.74878	-0.808217	0.742961	10.0041	-0.571429	1	no	no
olfch1	ENSDARG00000100026	100004933	yes	3.21263	-2.23933	0.344627	3.21434	-2.68379	1	no	no
olfcj1	ENSDARG00000104430	100005028	no	12.3022	-0.857109	0.779523	12.3013	-0.857328	0.754321
olfcq19	ENSDARG00000068566	100003908	yes	2.25875	-2.81062	0.335108	2.257	-3.30608	1	no	no
olfcs1	ENSDARG00000104241	564219	no	14.5162	-0.619023	0.763972	14.5123	-0.5982	0.749542
olfcs2	ENSDARG00000100451	570726	no	32.9852	-0.233429	0.937517	32.9772	-0.234193	0.924987
olfml2a	ENSDARG00000005648	100002223	no	102.377	-0.403212	0.731343	102.412	-0.399193	0.703464
olfml2ba	ENSDARG00000005716	557997	yes	31.6042	-0.864089	0.589759	667.021	-0.322756	0.567874	no	no
onecut2	ENSDARG00000090387	100000073	yes	14.1728	-1.45154	0.239555	36.391	-1.13288	0.246908	no	no
onecut3a	ENSDARG00000056395	565854	yes	12.2851	0.292152	0.936019	90.4326	-0.090541	0.950245	no	no
onecut3b	ENSDARG00000091059	100332965	yes	16.5065	0.766306	0.830102	21.6604	0.33756	0.895843	no	no
opn4b	ENSDARG00000053929	100884131	yes	13.1732	-0.673198	0.823614	27.6881	-0.532982	0.738625	no	no
opn4xa	ENSDARG00000079129	100331502	yes	10.3526	0.543768	0.871707	10.3524	-0.807619	1	no	no
opn7a	ENSDARG00000024208	570397	no	1.9432	-2.22102	0.55601	1.94323	-2.22097	1
opn7b	ENSDARG00000116584	100332167	yes	1.93607	-2.2764	0.54837	4.19878	-2.18505	1	no	no
opn7d	ENSDARG00000068124	100000387	yes	4.51808	-1.36603	0.672602	24.5856	0.0984079	0.978221	no	no
opn8a	ENSDARG00000086186	100002138	no	0.968036	-2.3264	1	0.967286	-2.32714	1
or102-5	ENSDARG00000025600	554781	yes				3.85351	-0.590145	1	no	no
or103-3	ENSDARG00000092218	100148313	no	0	-5.32186	1	0	-5.32142	1
or111-9	ENSDARG00000092238	80363	yes	10.018	0.708116	0.819141				no	no
ora3	ENSDARG00000059315	100004895	yes	1.61339	-3.48486	0.207247	1.61214	-4.4064	0.0279598	no	no
ora4	ENSDARG00000078223	100004842	yes	2.26707	-1.83464	0.682259	8.39326	-1.80798	0.27511	no	no
ora5	ENSDARG00000078257	565950	yes	10.6579	1.34627	0.71759	22.9272	1.14919	0.517674	no	no
orai2	ENSDARG00000035148	555612	yes	1.61933	-2.37468	0.524106	7.43181	-1.4305	1	no	no
osbp	ENSDARG00000004634	564372	yes	42.2646	0.124421	0.946633	637.635	0.292555	0.626354	no	no
osbpl11	ENSDARG00000076328	560514	yes	3.2106	-2.41399	0.293014	16.7379	-1.47393	0.42647	no	no
osbpl2a	ENSDARG00000053804	557483	yes	7.39126	-1.7304	0.429232	20.9269	-1.20988	0.280965	no	no
osbpl6	ENSDARG00000063730	100004342	yes	21.9177	0.0173963	0.994711	47.1343	0.305605	0.844519	no	no
OSBPL8	ENSDARG00000039724	101883298	yes	18.4121	-0.524944	0.794996	187.11	-0.472879	0.670359	no	no
osgin2	ENSDARG00000040302	570268	yes	13.5099	-0.822509	0.673212	83.8948	0.0560861	0.962455	no	no
osmr	ENSDARG00000100738	100144562	no	18.6954	0.644615	0.751128	4.49411	-0.726269	1
otol1a	ENSDARG00000001771	553759	no	19.6264	-0.0304944	0.992891	19.6372	-0.0294217	0.992366
otud1	ENSDARG00000100872	100537398	yes	59.1437	-0.524486	0.824678	757.32	0.655452	0.503802	no	no
OTUD7A	ENSDARG00000045556	559455	yes	3.54208	-3.3518	0.00851897	20.9298	-1.63293	0.115802	no	no
ovgp1	ENSDARG00000075745	101886411	yes	3.22274	-1.26446	0.730809	3.22144	-2.29571	1	no	no
ovol1b	ENSDARG00000078256	100534921	yes	5.13453	-1.53121	0.596423	12.8716	-1.14109	0.601907	no	no
oxgr1a.2	ENSDARG00000078743	100004138	no
oxgr1a.3	ENSDARG00000040247	100005578	no
oxtr	ENSDARG00000033956	100001530	yes	6.79407	-1.25062	0.656495	13.2643	-0.595631	0.832024	no	no
p2rx8	ENSDARG00000024139	387299	no
P2RY14	ENSDARG00000103305	793750	yes	12.5881	0.696342	0.836928	28.4115	0.813866	0.619551	no	no
p2ry2.1	ENSDARG00000099915	571633	yes	12.605	-0.205308	0.953385	13.5665	-0.251511	1	no	no
p2ry2.2	ENSDARG00000104927	799741	no	6.14634	0.0751437	0.992455	6.14489	0.0741921	1
p2ry2.3	ENSDARG00000104425	799661	yes	0.320656	-4.48526	1	0.321008	-4.60038	1	no	no
p2ry8	ENSDARG00000055560	566497	yes	27.0996	1.1825	0.459714	74.7727	1.04949	0.354656	no	no
pacs2	ENSDARG00000078185	794778	yes	21.6286	-1.4646	0.181365	24.836	-1.90403	0.0123028	no	no
paf1	ENSDARG00000098432	553020	yes	7.11556	0.463598	0.917142	161.163	0.157779	0.886888	no	no
pak6a	ENSDARG00000027564	100536197	yes	32.6242	-0.260277	0.888782	29.7215	-0.464891	0.766251	no	no
pak6b	ENSDARG00000052405	567874	no	6.75994	-1.86127	0.233375	10.6317	-1.49908	0.295297
palm2	ENSDARG00000069608	100002543	yes	272.865	1.11788	0.187143	6896.17	2.86454	8.38214e-11	no	yes
paplna	ENSDARG00000027867	562930	yes	10.0055	-1.66184	0.17878	52.1858	-1.05516	0.183414	no	no
paqr7a	ENSDARG00000100462	798104	yes	12.9482	0.569284	0.890126	69.7908	1.09627	0.377337	no	no
pard6b	ENSDARG00000003865	100124652	no	9.98053	0.423144	0.90473	9.98555	0.361972	1
pax5	ENSDARG00000037383	60636	yes	1.61339	-4.89964	0.00164018	15.1187	-2.71314	0.0112298	no	no
pax8	ENSDARG00000015879	60637	yes	6.78835	-0.736611	0.840191	29.012	-1.71787	0.0766695	no	no
pbx3a	ENSDARG00000089262	387532	yes	6.42323	-1.23926	0.662667	7.71129	-1.9455	0.323596	no	no
pcdh1gb2	ENSDARG00000101307	503573	yes	55.4591	-0.292268	0.856169	381.029	-0.420586	0.605372	no	no
pcdh1gb9	ENSDARG00000088475	553940	no	128.498	-0.330665	0.781029	150.427	-0.269461	0.795827
PCDH8	ENSDARG00000102185	100002026	yes	16.7206	-1.30558	0.530316	19.3017	-1.34646	0.475429	no	no
pcdh9	ENSDARG00000063264	100004118	yes	130.29	-1.36224	0.0550044	177.088	-1.57329	0.0137327	no	no
pcif1	ENSDARG00000099084	553360	yes	72.7474	-0.470616	0.726981	433.391	-0.340325	0.603389	no	no
PCMTD2	ENSDARG00000104883	100536777	yes	6.76614	-0.969325	0.761028	93.6815	-0.0379904	0.977783	no	no
pcsk2	ENSDARG00000019451	100004460	no	11.6098	-0.504044	0.856358	11.2911	-0.54426	1
pcsk5a	ENSDARG00000067537	571235	yes	18.4076	-1.07533	0.480002	18.0865	-1.8441	0.0860373	no	no
pcsk6	ENSDARG00000104574	794305	yes	13.2097	-0.815207	0.619835	20.6258	-1.07967	0.308645	no	no
pcsk9	ENSDARG00000074185	100150316	yes	7.74795	-0.416175	0.894092	7.74997	-1.22228	1	no	no
pctp	ENSDARG00000073985	566726	yes	6.75721	1.06844	0.771114	165.177	1.10496	0.0758139	no	no
pcyt1ab	ENSDARG00000004492	553770	yes	8.68994	-0.537496	0.849936	229.371	0.0119128	0.992215	no	no
pde11a	ENSDARG00000063732	561338	yes	10.6722	0.186193	0.96615	74.2517	-0.685772	0.465959	no	no
pde1a	ENSDARG00000060875	564465	yes	0.322679	-5.35835	0.0344314	21.3093	-1.61351	0.0846142	no	no
pde3a	ENSDARG00000004227	567051	yes	77.2213	0.105814	0.958719	294.645	-0.848608	0.155353	no	no
pde4bb	ENSDARG00000074233	555599	yes	60.2934	1.5225	0.0691745	133.144	1.76884	0.00629041	no	yes
pde4d	ENSDARG00000032761	566998	yes	150.798	1.83346	0.0250802	177.825	1.50493	0.0482084	yes	yes
pde8a	ENSDARG00000087941	791145	yes	13.1833	-0.139862	0.97266	68.9795	1.06604	0.246647	no	no
pde8b	ENSDARG00000063706	571011	yes	7.72001	-1.12231	0.693321	85.1629	-0.0414903	0.978692	no	no
pdlim5b	ENSDARG00000027600	393165	yes	346.403	1.41261	0.0516619	907.345	1.6041	0.000183877	no	yes
pdlim7	ENSDARG00000103854	393813	yes	64.1918	1.22336	0.384494	343.652	1.46664	0.0118839	no	yes
pdzd2	ENSDARG00000059801	569088	yes	46.4799	-0.876198	0.383222	416.314	-0.274667	0.761026	no	no
PDZD4	ENSDARG00000090564	100001805	yes	15.7829	-2.53084	0.114252	47.2104	-0.148668	0.940713	no	no
pdzd7a	ENSDARG00000076974	100332580	yes	14.2374	-0.184725	0.961895	28.3873	-0.66369	0.664103	no	no
pdzrn3a	ENSDARG00000073757	100149029	yes	12.2845	-0.862634	0.793389	27.1177	-0.654602	0.681314	no	no
pdzrn4	ENSDARG00000045687	798289	no	27.0786	-0.380323	0.841352	25.7964	-0.311374	0.859393
pea15	ENSDARG00000079771	557745	yes	27.085	2.48421	0.0565835	71.3584	2.36138	0.0141899	no	yes
peak3	ENSDARG00000094273	566981	yes	11.2543	0.47924	0.870755	152.932	2.04294	0.0212778	no	yes
pex11a	ENSDARG00000060707	565760	yes	5.49931	-0.496928	0.909551	5.50008	-1.234	1	no	no
pex5lb	ENSDARG00000074403	100332270	yes	6.78835	-0.779099	0.834883	7.43469	-1.74489	0.373865	no	no
pfklb	ENSDARG00000099755	550259	yes	26.1224	-0.169554	0.927368	27.4156	-0.306186	0.82304	no	no
pgbd5	ENSDARG00000011042	570182	no	18.3279	-2.57711	0.0600279	18.333	-2.55077	0.062936
pgm5	ENSDARG00000060745	560297	no	30.0478	1.45124	0.362128	30.0452	1.45126	0.339634
pgr	ENSDARG00000035966	569575	yes	5.14263	-1.25469	0.683017	11.2623	-1.16124	0.602123	no	no
phactr1	ENSDARG00000023916	100334776	no	23.523	-0.00417943	0.999827	21.606	-0.0457893	0.981764
phactr2	ENSDARG00000027172	570136	yes	651.409	2.48276	2.68443e-05	1184.6	2.63726	1.21472e-07	yes	yes
phf1	ENSDARG00000057439	100334345	yes	25.5855	2.1377	1	27.5261	1.09103	1	no	no
PHF21B	ENSDARG00000109502	101883360	yes	20.0179	-0.616383	0.710597	29.0191	-0.77726	0.455219	no	no
phip	ENSDARG00000015970	569727	yes	550.002	-0.0425668	0.96735	1452.95	-0.199957	0.715202	no	no
phldb1a	ENSDARG00000061093	566287	yes	52.0058	-0.104232	0.959637	57.5082	-0.209974	0.887436	no	no
pho	ENSDARG00000035133	334003	no	1851.07	-0.136773	0.884956	1851.99	-0.133954	0.864562
phtf2	ENSDARG00000102123	432376	yes				108.259	-0.186651	0.882403	no	no
pi4kaa	ENSDARG00000076724	556956	yes	68.2699	-0.247983	0.847481	177.615	0.184564	0.814453	no	no
piezo1	ENSDARG00000076870	567949	yes	327.563	1.47433	0.0113649	1892.33	1.61053	0.000901679	yes	yes
pik3c2g	ENSDARG00000099803	100330514	yes	7.09916	-1.09603	0.611383	79.9336	-0.736108	0.459531	no	no
pimr100	ENSDARG00000095588	100034450	yes	2.56524	-3.80781	0.592672	94.0734	-0.373769	0.851132	no	no
pimr132	ENSDARG00000069276	560200	yes	6.46308	-0.724403	0.87304	4.19157	-2.13687	1	no	no
pimr140	ENSDARG00000077665	567487	yes	8.41222	-0.942234	0.767426	13.2398	-0.39905	1	no	no
pimr141	ENSDARG00000057253	100006444	no	11.927	-0.438387	0.904473	9.34332	-0.50359	1
pimr142	ENSDARG00000114493	795594	yes	10.2954	-1.57556	0.448874	12.5506	-0.42012	1	no	no
pimr192	ENSDARG00000115056	100330229	yes	1.60328	-0.692911	1	1.93457	-2.91155	1	no	no
pimr193	ENSDARG00000071695	110440207	yes	0	-5.76965	0.164244	2.90186	-2.32641	1	no	no
pimr194	ENSDARG00000111440	100330151	yes				8.38191	0.373932	1	no	no
pimr208	ENSDARG00000078162	101884995	yes	1.92798	-2.70523	0.295118	23.228	-0.598656	0.731935	no	no
pimr213	ENSDARG00000073913	558531	yes	8.09073	0.0583462	0.992013	28.0934	-0.0681008	0.976567	no	no
pimr47	ENSDARG00000056598	555903	no	8.72931	-0.768755	0.779536	4.53275	-0.99767	1
pimr48	ENSDARG00000056616	795474	no	8.08597	0.474797	0.908861	9.37351	0.465403	1
pimr49	ENSDARG00000093408	100005956	yes	17.8127	0.571343	0.959464	22.3141	0.407366	0.865822	no	no
pimr54	ENSDARG00000057284	100329231	yes	0	-5.32478	1	0	-4.7727	1	no	no
pimr55	ENSDARG00000057769	555841	yes	10.9768	0.0395451	0.992476	18.3873	-0.96448	0.522133	no	no
pimr58	ENSDARG00000109867	108190101	yes	63.0589	0.188428	0.944272	0.322429	-5.06747	1	no	no
pimr58	ENSDARG00000115410	799681	yes				72.6971	0.226817	0.899773	no	no
pimr59	ENSDARG00000101827	108190101	yes				0.322429	-5.06747	1	no	no
pimr64	ENSDARG00000113632	108181519	yes	15.829	-0.877707	0.630272	8.69009	-1.25024	1	no	no
pimr70	ENSDARG00000088058	108190369	yes	28.751	1.95197	0.197788	45.9306	1.53648	0.390041	no	no
pimr71	ENSDARG00000044264	100537940	yes	2.57655	-1.91033	0.441291	45.0896	-0.223252	0.863573	no	no
pimr73	ENSDARG00000071183	100537673	yes	1.92714	-2.55438	0.433427	9.6673	-1.72828	0.27245	no	no
pimr74	ENSDARG00000075240	100537706	yes				5.16323	-1.64462	1	no	no
pimr75	ENSDARG00000116970	108180125	yes	4.1972	2.69589	1	25.2173	-0.0722606	0.976525	no	no
pimr76	ENSDARG00000115706	100006730	yes				0	-5.94704	1	no	no
pimr78	ENSDARG00000116021	103909231	yes							no	no
pimr93	ENSDARG00000056838	567749	yes	96.4928	-0.248326	0.821223	49.0445	-0.418336	0.695882	no	no
pimr97	ENSDARG00000114532	792925	yes				104.162	0.823589	0.69496	no	no
pimr97	ENSDARG00000110606	792997	yes				0	-5.50058	1	no	no
pimr98	ENSDARG00000111823	100034438	yes				0	-6.03277	1	no	no
pip4k2cb	ENSDARG00000091637	100535634	yes	14.1311	0.808617	0.811563	50.4607	0.929811	0.695155	no	no
pip4p2	ENSDARG00000056034	566642	no	4.18185	-1.21445	0.710876	4.18307	-1.21399	1
pitpnb	ENSDARG00000036005	393894	yes	428.415	0.28476	0.784242	1904.04	0.985195	0.048728	no	no
PITPNC1	ENSDARG00000099260	563621	yes	27.0043	-0.689085	0.694167	84.8069	-0.946301	0.360545	no	no
pjvk	ENSDARG00000079945	100006646	yes	12.3034	0.929118	0.804405	12.6238	0.039936	1	no	no
pkd1a	ENSDARG00000030417	100149562	yes	148.79	-0.501622	0.605262	934.153	-0.496352	0.476837	no	no
pkn1b	ENSDARG00000062748	100007897	yes	43.9902	0.89937	0.663408	104.505	0.625468	0.704444	no	no
pkn2	ENSDARG00000101983	571965	yes	30.3736	-0.327342	0.863016	247.681	-0.151507	0.831564	no	no
pla1a	ENSDARG00000102176	334017	yes				54.1151	-0.551548	0.646045	no	no
pla2r1	ENSDARG00000077474	100538038	yes	56.2368	0.104773	0.961075	57.521	0.17346	0.9162	no	no
plbd1	ENSDARG00000063313	569736	yes	19.3125	-0.0533632	0.987229	24.4579	0.242335	0.909996	no	no
PLCB4	ENSDARG00000100786	100537538	yes	6.7792	0.0679629	0.98822	6.77976	-0.133501	1	no	no
plcl1	ENSDARG00000067676	563105	yes	40.4372	0.380716	0.887956	229.506	-1.36555	0.00109698	no	no
plekhd1	ENSDARG00000091349	100538004	yes	14.5248	0.281338	0.918475	26.7509	-0.705261	0.597272	no	no
plekhg5b	ENSDARG00000101752	796404	yes	509.968	2.34769	0.00329029	1476.58	2.50335	6.98045e-05	yes	yes
plk2a	ENSDARG00000090752	100148413	yes	1463.01	3.8929	2.46224e-21	8874.34	4.52453	3.47713e-20	yes	yes
plpp2a	ENSDARG00000002231	563806	yes	138.585	2.9125	0.000292312	276.25	3.23234	2.36614e-08	yes	yes
plpp4	ENSDARG00000098862	100334794	yes	1.61172	-2.84883	0.232419	5.81248	-1.68728	1	no	no
PLPP7	ENSDARG00000109568	568758	yes	1.61137	-2.07631	0.599834	10.3051	-1.37998	0.341687	no	no
plppr2b	ENSDARG00000044600	571463	yes	3.88521	-0.661784	0.888515	23.9621	0.14686	0.966859	no	no
plppr4b	ENSDARG00000078755	571722	yes	6.76482	-1.13448	0.580709	16.4426	-1.16428	0.41702	no	no
plscr3a	ENSDARG00000093078	564882	no	22.6318	-0.391893	0.887724	22.3113	-0.412835	0.860457
plxna1a	ENSDARG00000105452	795761	yes	100.525	-1.4736	0.0166584	826.72	-1.44397	0.000252947	no	no
plxna2	ENSDARG00000060372	561285	yes	180.962	-0.174839	0.924766	3081.69	0.366129	0.695813	no	no
plxnb2b	ENSDARG00000036985	100333657	yes	28.9913	-1.36311	0.122268	30.9194	-1.29472	0.142444	no	no
pmepa1	ENSDARG00000039325	436853	yes	21.0179	1.26778	0.575111	21.0142	1.26752	1	no	no
pmm1	ENSDARG00000038398	100007686	yes	18.7543	2.05131	0.442754	21.6477	-0.0833085	0.971134	no	no
pnck	ENSDARG00000043648	567480	yes	7.12506	0.553892	0.922751	7.12516	-1.31931	1	no	no
pnrc1	ENSDARG00000043904	100034521	no	5.48554	-0.372187	0.946695	5.48129	-0.373286	1
pofut2	ENSDARG00000045175	777668	yes	17.6745	-0.157261	0.966915	20.8925	-0.324809	0.907711	no	no
poldip3	ENSDARG00000099375	100536140	yes	230.072	0.0741913	0.946671	429.754	0.219321	0.780981	no	no
pole2	ENSDARG00000100028	192320	yes	209.114	-0.0157146	0.993108	308.167	-0.0488749	0.966656	no	no
polk	ENSDARG00000059963	562749	yes	5.79608	-2.60179	0.123593	5.79519	-2.70457	0.0997018	no	no
POLR2E	ENSDARG00000074274	100330570	yes	3.22261	0.510865	1	1.92605	-0.0070478	1	no	no
polr3b	ENSDARG00000062915	562329	yes	153.346	-0.145221	0.936125	272.806	-0.020183	0.984228	no	no
polrmt	ENSDARG00000101220	100034434	yes	41.8436	-0.153333	0.936638	308.273	0.431647	0.434111	no	no
pomcb	ENSDARG00000069307	100034412	yes	5.50252	0.0904441	0.988414	5.50294	-0.370137	1	no	no
porcn	ENSDARG00000052558	100006275	yes	6.09245	-1.12106	0.783613	65.5512	-0.867151	0.604819	no	no
pou4f3	ENSDARG00000006206	30534	no	9.36741	-0.00229103	0.999827	9.36638	-0.00248998	1
pparab	ENSDARG00000054323	557714	no	9.64513	-0.493489	0.903057	9.64872	-0.685557	1
ppargc1a	ENSDARG00000067829	553418	yes	37.0539	-1.67728	0.0238576	70.2207	-1.80229	0.00155103	no	no
ppfia1	ENSDARG00000098674	100003520	yes	7.08856	0.286168	0.942449	1331.31	0.961802	0.0455126	no	no
ppfia2	ENSDARG00000013000	566597	yes	24.4917	-0.699216	0.650203	269.053	-1.01761	0.190942	no	no
ppp1cbl	ENSDARG00000102012	334597	yes	563.415	0.448515	0.64503	1823.11	0.720516	0.151404	no	no
ppp1r15a	ENSDARG00000069135	797943	yes	4320.87	1.10356	0.300672	12434.9	1.81484	0.0238421	no	yes
ppp1r21	ENSDARG00000103144	492333	yes	43.1237	0.360864	0.824304	212.049	0.223592	0.803435	no	no
ppp1r9ala	ENSDARG00000063580	571989	yes	86.7738	0.342398	0.802378	96.7658	0.394709	0.727772	no	no
ppp2r2aa	ENSDARG00000021996	558752	yes	28.9905	0.871873	0.765653	57.0766	1.0556	0.300017	no	no
ppp4r1	ENSDARG00000101316	393230	yes	14.7981	0.816776	0.734626	125.031	0.495425	0.593685	no	no
ppp4r3b	ENSDARG00000103415	336198	yes	410.266	0.499716	0.460014	664.198	0.616781	0.231786	no	no
pptc7b	ENSDARG00000052658	562909	yes	2.90327	-1.91645	0.480256	536.813	0.421549	0.499689	no	no
PQLC1	ENSDARG00000112922	101883969	yes	7.76092	-0.272251	0.948482	14.2115	-0.541361	0.789775	no	no
prdm14	ENSDARG00000045371	563151	yes	14.7765	-1.0075	0.698423	20.5701	-1.2543	0.540669	no	no
PRDM15	ENSDARG00000098867	566512	yes	19.6757	-0.446135	0.877208	39.0487	0.216902	0.905366	no	no
prdm2a	ENSDARG00000090721	100003615	yes	48.0991	-0.359911	0.832008	69.9612	-1.4437	0.106225	no	no
prickle3	ENSDARG00000073996	570116	yes	82.6095	1.84924	0.0222722	238.78	1.80834	0.00312076	yes	yes
PRKAR2B	ENSDARG00000036446	100331387	yes	3.85596	-2.74335	0.141209	9.66166	-2.08631	0.0910383	no	no
prkcab	ENSDARG00000099841	100333967	yes	33.5476	-0.133909	0.940348	44.2036	-0.268913	0.830683	no	no
prkcg	ENSDARG00000004561	100003514	yes	4.53413	-0.833724	0.861247	51.0463	-1.32066	0.253623	no	no
prkcz	ENSDARG00000043332	555737	yes	14.1645	0.206012	0.943169	654.272	0.470246	0.488473	no	no
prkg2	ENSDARG00000054741	100125912	yes	2.8859	-1.88653	0.629835	42.8826	-1.51025	0.0440936	no	no
prlh2	ENSDARG00000071735	110437754	yes				0.322429	-4.42036	1	no	no
prlrb	ENSDARG00000045955	561846	yes	10.9493	-0.892922	0.705011	11.2782	-0.895405	0.64687	no	no
PRMT8	ENSDARG00000040633	556054	yes	6.74388	-0.704213	0.845429	7.06927	-1.63581	1	no	no
prokr1b	ENSDARG00000111213	798231	yes	13.2773	-0.42204	0.927004	12.9534	-0.606241	0.869172	no	no
prop1	ENSDARG00000039756	100001377	no	13.5181	-0.520157	0.870089	14.1613	-0.633379	0.811139
prpsap1	ENSDARG00000099222	431746	yes	130.844	0.503046	0.53865	236.672	0.724039	0.204858	no	no
prr5a	ENSDARG00000075977	555584	yes	49.0638	1.20206	0.313335	606.521	0.6334	0.468703	no	no
prr7	ENSDARG00000089800	101886277	yes	14.8459	-0.0620656	0.983181	22.5819	-0.653172	0.624768	no	no
prrc2c	ENSDARG00000057583	407633	yes	517.276	0.325805	0.728803	1951.34	0.143534	0.855618	no	no
PRRG3	ENSDARG00000079102	563290	yes	15.1794	0.599063	0.816841	15.8208	-0.142437	0.952131	no	no
prrt1	ENSDARG00000062208	559734	yes	12.2512	-1.22778	0.55093	15.4699	-1.39348	0.407908	no	no
prtga	ENSDARG00000100044	108179070	yes				0	-4.94918	1	no	no
psda	ENSDARG00000078102	570918	yes	43.2401	0.323292	0.864151	620.033	0.315287	0.709434	no	no
PSTK	ENSDARG00000115015	103911967	yes	54.8924	1.01566	0.654465	180.851	0.738364	0.315635	no	no
pstpip2	ENSDARG00000089569	100537857	yes				59.2997	0.312474	0.788522	no	no
ptar1	ENSDARG00000102338	561820	no	7.10426	-0.129532	0.979575	7.10507	-0.1295	1
ptf1a	ENSDARG00000014479	368662	yes	5.15477	-2.58748	0.147304	11.2552	-2.62349	0.063847	no	no
ptger3	ENSDARG00000055781	100000544	yes	7.7018	-0.555564	0.890213	19.6141	-1.77563	0.300596	no	no
ptger4b	ENSDARG00000035415	100005416	no	12.928	0.32086	0.926913	12.9246	0.320096	1
ptgfr	ENSDARG00000074016	571808	no	10.6282	-0.0890289	0.986496	10.6259	-0.0898637	1
pth4	ENSDARG00000106914	101886149	yes	5.82604	1.17677	0.802719	19.4136	-0.0916484	0.974889	no	no
ptpn12	ENSDARG00000102141	393642	no	52.2688	1.75309	0.104894	106.938	1.8962	0.0434408
ptpn20	ENSDARG00000075459	571774	yes	10.3032	-1.59096	0.324652	99.7734	-1.27232	0.118135	no	no
ptpn22	ENSDARG00000104197	565606	yes	85.9381	0.623435	0.635083	151.358	0.825137	0.433227	no	no
ptprga	ENSDARG00000045006	561197	no	126.465	0.332027	0.746216	126.141	0.32846	0.717343
ptprq	ENSDARG00000008849	555426	yes	11.9574	-1.61147	0.471899	21.3196	-1.35761	0.395855	no	no
ptprsa	ENSDARG00000110940	100526672	yes				189.193	-1.6641	0.0323566	no	no
ptprt	ENSDARG00000074781	567095	yes				177.292	-0.98242	0.251999	no	no
ptx3b	ENSDARG00000079515	566001	yes	5.15868	-1.36071	0.515588	5.48139	-1.91574	1	no	no
pum2	ENSDARG00000061040	567494	yes	493.214	0.476047	0.552935	526.202	0.581468	0.424116	no	no
pxdn	ENSDARG00000098733	100332937	yes	276.371	1.33125	0.066782	286.708	1.30593	0.0677289	no	no
pxnb	ENSDARG00000060766	565130	yes	35.8317	1.09187	0.537332	280.824	1.64966	0.0131616	no	yes
qpct	ENSDARG00000089717	795685	yes	15.1483	-0.9855	0.549744	16.1145	-1.20271	0.376006	no	no
qpctlb	ENSDARG00000062293	564655	yes	7.44656	-0.559527	0.887568	8.41343	-1.95357	0.323555	no	no
qsox2	ENSDARG00000077174	559603	yes	33.1841	-0.69264	0.573578	234.948	-0.447489	0.529145	no	no
r3hdm2	ENSDARG00000102610	100330669	yes	46.7926	0.424605	0.767653	65.5331	0.181285	0.893613	no	no
rab11fip1a	ENSDARG00000046124	553374	no	37.7393	-0.470455	0.695814	60.9504	-0.734022	0.317038
rab11fip2	ENSDARG00000101432	100334729	yes	30.3132	1.02902	0.454077	143.071	-0.530942	0.533353	no	no
rab11fip5a	ENSDARG00000104179	562719	yes	9.9928	-1.36965	0.400785	78.7144	-1.47285	0.00920028	no	no
RAB19	ENSDARG00000101150	555645	yes	6.46414	0.411055	0.944519	52.6759	-1.02511	0.350253	no	no
rab38b	ENSDARG00000112889	100007788	yes	3.56134	-0.789072	0.873481	29.9935	-0.692169	0.575597	no	no
rab38c	ENSDARG00000074719	562524	yes	20.2572	0.511536	0.830048	63.6919	0.330483	0.843638	no	no
rab3gap1	ENSDARG00000098079	777744	yes	52.6431	0.807999	0.596423	177.076	0.503418	0.491646	no	no
rabl6b	ENSDARG00000077653	100003036	yes	373.47	0.440895	0.580219	673.912	0.0442675	0.959876	no	no
RAC1	ENSDARG00000099506	100537765	yes				6.76816	-1.25735	1	no	no
rad50	ENSDARG00000038917	553029	yes	212.798	-0.0127465	0.994056	240.223	-0.0260359	0.983407	no	no
ralbp1	ENSDARG00000078653	404612	yes	558.912	1.67076	0.00988411	751.274	1.67104	0.00424105	yes	yes
ralgapb	ENSDARG00000088899	559303	yes	251.939	1.29943	0.0318899	287.361	1.27024	0.0261042	yes	yes
RALGDS	ENSDARG00000042409	799483	yes	254.905	1.61261	0.026917	6424.71	2.48694	1.53839e-06	yes	yes
ralyl	ENSDARG00000090292	100148343	yes	18.3426	-0.193953	0.937634	76.1594	0.351775	0.789549	no	no
rap2aa	ENSDARG00000077553	100332969	yes	4.51548	0.343541	1	320.237	0.750658	0.185015	no	no
rap2ab	ENSDARG00000040246	100003903	no	0	-7.08906	0.00442345	0	-7.08944	1
rapgef3	ENSDARG00000079291	101886094	yes	147.513	3.10738	1.71266e-05	666.675	4.12856	5.96912e-12	yes	yes
rapgef5a	ENSDARG00000075271	100331732	yes	91.9964	3.02438	0.000252879	2113.24	2.92061	2.80797e-07	yes	yes
rapgef6	ENSDARG00000010945	335032	no	61.0503	0.411922	0.790418	90.7591	0.750107	0.499745
rapgefl1	ENSDARG00000079912	100149497	yes	32.2925	-0.475412	0.800288	37.4457	-0.517803	0.691785	no	no
raph1a	ENSDARG00000006301	557435	yes	351.194	0.668695	0.319923	1113.17	0.252111	0.662352	no	no
rargb	ENSDARG00000054003	100034753	no	9.70839	-1.11279	0.680076	9.70896	-1.04418	1
RASA2	ENSDARG00000078775	100331895	yes	141.633	1.50046	0.0350748	240.37	1.09731	0.0701985	yes	no
rasef	ENSDARG00000076250	570731	yes	9.7065	-0.136168	0.97547	26.4725	0.333565	0.859711	no	no
rasgrf2a	ENSDARG00000075054	558859	yes	33.158	-1.02713	0.419506	146.017	-0.87176	0.38428	no	no
rasgrf2b	ENSDARG00000002816	553520	yes	33.8752	-0.627981	0.624839	62.637	-0.277604	0.826556	no	no
rasgrp2	ENSDARG00000062328	557063	yes	19.2966	1.44117	0.456248	27.059	1.06648	0.480106	no	no
RASGRP2	ENSDARG00000099092	797658	yes	41.3248	1.67552	0.224992	117.029	2.39052	0.0416753	no	yes
rasl10a	ENSDARG00000062314	100004647	yes	0	-4.44632	1	47.1273	-0.187971	0.908464	no	no
RASSF10	ENSDARG00000112859	335170	yes	44.5378	-0.240984	0.884506	78.0636	-0.37199	0.703104	no	no
rassf8a	ENSDARG00000045596	100003291	yes	59.6865	1.31972	0.229523	61.9301	1.41245	0.178623	no	no
rb1cc1	ENSDARG00000076559	100332174	yes	274.109	0.353715	0.665743	1322.88	0.500572	0.385849	no	no
rbm15	ENSDARG00000073847	798517	yes	98.4666	-0.276343	0.854581	289.009	-0.238773	0.759738	no	no
rbm27	ENSDARG00000060521	100332262	yes	101.602	0.331665	0.772936	138.787	0.513838	0.603702	no	no
RBP1	ENSDARG00000038742	100141334	yes	3.53328	-1.83758	0.643159	3.53535	-2.01132	1	no	no
rbpms	ENSDARG00000099396	100537153	yes				26.1028	-0.41737	0.783113	no	no
rbsn	ENSDARG00000078215	569240	yes	3.85394	-1.32853	0.68376	531.124	0.413336	0.475818	no	no
rca2.2	ENSDARG00000095512	565541	yes	146.334	2.82344	0.000646009	494.155	4.33175	5.91075e-16	yes	yes
rce1a	ENSDARG00000077909	557720	yes	12.9228	0.736042	0.78101	17.109	0.638869	1	no	no
rce1b	ENSDARG00000088207	566908	yes	0	-5.25461	1	8.6942	-1.83629	0.384018	no	no
rcl1	ENSDARG00000038312	445388	yes	217.438	0.211765	0.85061	307.913	0.284275	0.748354	no	no
rcvrnb	ENSDARG00000111827	792903	no	1.92596	-3.12585	0.21909	1.92747	-3.12527	1
rec8a	ENSDARG00000078329	108192159	no
reps2	ENSDARG00000076768	101882936	yes	90.3286	2.60386	0.00107858	135.811	1.72603	0.0184456	yes	yes
rerea	ENSDARG00000077353	569081	yes	1431.61	0.892346	0.0739151	4688.04	0.432831	0.335428	no	no
retreg1	ENSDARG00000079059	100003524	yes	0.641311	-4.62239	0.0589105	1.60504	-3.61737	1	no	no
RFESD	ENSDARG00000042159	559859	yes	12.2031	-0.641787	0.835194	39.909	-0.297586	0.844519	no	no
rgrb	ENSDARG00000098724	554142	yes	2363.23	2.57355	0.00184135	2416.84	2.58168	0.0018904	yes	yes
RGS9BP	ENSDARG00000086756	559232	yes	3.54947	-0.937836	0.877438	13.5392	-2.13016	0.271347	no	no
rhobtb1	ENSDARG00000079468	100537290	yes	13.8478	-1.47172	0.188218	25.4479	-0.956742	0.417898	no	no
rhoh	ENSDARG00000070121	553413	yes	14.1438	-0.00799223	0.999827	70.6124	0.397593	0.749253	no	no
rimbp2	ENSDARG00000001154	563166	yes	25.7431	-1.72719	0.0495829	239.786	-0.80575	0.391796	no	no
rims1b	ENSDARG00000078902	568486	yes	18.0129	-1.29715	0.42512	29.2771	-1.6984	0.190582	no	no
rims3	ENSDARG00000062305	563414	yes	5.8201	-1.63617	0.493021	16.8054	-0.62047	0.730608	no	no
rin1a	ENSDARG00000079095	568715	yes	9.99601	-1.17872	0.534505	22.5502	-1.07415	0.503327	no	no
ripk2	ENSDARG00000104290	373874	yes	26.1394	0.694603	0.679003	26.1373	0.694424	0.647996	no	no
RNF14	ENSDARG00000091727	558876	yes				5.47704	-1.12729	1	no	no
rnf166	ENSDARG00000089538	100334524	yes	28.6797	0.151672	0.942901	98.7186	-0.488718	0.547389	no	no
rnf167	ENSDARG00000017636	101055497	yes	17.3781	0.288148	0.943386	29.9162	-0.167761	0.953432	no	no
RNF180	ENSDARG00000073720	562354	yes	9.37669	0.949379	0.834651	10.3408	0.190489	1	no	no
rnf19b	ENSDARG00000060926	562396	yes	79.2681	0.470239	0.771608	802.304	1.51755	0.0191445	no	yes
rnf207b	ENSDARG00000012409	568322	yes	3.23273	-2.34888	0.278637	3.2315	-2.34915	1	no	no
RNF208	ENSDARG00000078056	100526811	yes	84.252	-0.828379	0.604012	263.98	-0.978965	0.275952	no	no
rnf213b	ENSDARG00000103551	563001	no	27.785	-1.18332	0.440296	27.7854	-1.18345	0.409567
rnf215	ENSDARG00000059424	101882431	yes	8.42053	-0.24837	0.962653	8.42064	0.00488707	1	no	no
RNF219	ENSDARG00000090904	100003830	yes	6.44953	-1.56427	0.577631	5.80087	-1.66736	1	no	no
RNF5	ENSDARG00000075606	100537822	yes	38.0973	0.526226	0.751732	51.2858	0.312261	0.792194	no	no
rorb	ENSDARG00000033498	567943	no	116.55	0.364551	0.880501	115.686	0.438587	0.831272
rp1	ENSDARG00000077687	101882676	yes	3.88402	0.998123	1	67.7202	-1.91038	0.031086	no	no
rpe65a	ENSDARG00000007480	393724	yes	4305.69	2.4612	0.0181221	5588.28	2.41774	0.0138757	yes	yes
rph3ab	ENSDARG00000105490	563377	yes	3.54137	-2.4746	0.220943	17.413	-1.95262	0.0341384	no	no
rpn2	ENSDARG00000009724	335985	no	1184.36	-0.267516	0.833419	1144.65	-0.288216	0.795855
rprd2b	ENSDARG00000074676	556426	yes	578.554	0.257142	0.715395	735.954	0.165198	0.806698	no	no
rps6ka2	ENSDARG00000028469	571285	yes	6.74186	-1.54903	0.581125	18.988	-1.06671	0.490168	no	no
rps6ka4	ENSDARG00000044436	561959	yes	26.7984	0.0892263	0.972205	499.164	0.451977	0.410726	no	no
rpz6	ENSDARG00000089889	100000883	no	61.2769	0.32073	0.827812	60.9649	0.313116	0.810015
rrp1	ENSDARG00000103337	321059	yes	228.023	0.146805	0.908667	459.607	0.259882	0.754838	no	no
RSBN1	ENSDARG00000098968	100330644	yes	158.961	0.178517	0.853074	344.707	0.249398	0.694328	no	no
RSPH1	ENSDARG00000102261	100003444	yes	11.2695	-1.60104	0.440098	57.4695	-0.336914	0.781749	no	no
rsu1	ENSDARG00000102885	553276	yes	71.3535	2.3593	0.0678077	3844.47	2.02545	8.37405e-06	no	yes
RTKN	ENSDARG00000031345	564545	yes	17.0777	-0.524171	0.86627	370.075	1.03943	0.104011	no	no
rubcn	ENSDARG00000078752	100000896	yes	22.8457	0.335652	0.892747	219.523	0.445831	0.508944	no	no
rxfp3.3a2	ENSDARG00000062111	100149732	yes	13.5323	0.38931	0.918163	17.7094	-0.00419683	0.999623	no	no
rxfp3.3a3	ENSDARG00000069246	100002494	yes	8.70076	-1.17881	0.506374	21.9559	-0.667422	0.684366	no	no
rxfp3.3b	ENSDARG00000059348	101883306	yes	6.11493	-0.618196	0.896724	8.04523	-0.612743	1	no	no
rxraa	ENSDARG00000057737	555578	yes	71.6002	0.791501	0.471932	1273.99	0.601652	0.284403	no	no
ryr1b	ENSDARG00000023797	570245	yes	53.2264	-1.11895	0.233328	79.968	-1.60536	0.00514243	no	no
s1pr3a	ENSDARG00000042470	798390	yes	4.83614	-2.71216	0.175597	39.7212	-0.681384	0.603702	no	no
SAMD9	ENSDARG00000102729	101886156	yes	3.85191	-2.93255	0.142558	3.85493	-2.99351	0.118664	no	no
sarnp	ENSDARG00000059357	554106	yes	1339.59	0.979006	0.0802724	1927.78	0.975937	0.0718203	no	no
satb1b	ENSDARG00000062621	571757	yes	50.9994	-0.639437	0.569687	95.4335	-0.828288	0.1736	no	no
satb2	ENSDARG00000061885	563435	yes	21.009	-1.16761	0.445191	100.044	-2.56244	4.7384e-06	no	no
sbno1	ENSDARG00000099080	100005813	yes	223.73	0.166532	0.896601	654.728	0.4529	0.455332	no	no
SBSPON	ENSDARG00000110160	100151218	yes	16.1269	-0.425454	0.865923	27.1392	-0.115265	0.96022	no	no
scai	ENSDARG00000060865	556383	yes	13.8674	-0.276121	0.905279	40.3619	-1.00707	0.351126	no	no
SCARF2	ENSDARG00000114825	100329632	yes	221.821	0.122524	0.940636	240.493	-0.0533359	0.9686	no	no
scfd2	ENSDARG00000040005	792105	no	50.5479	0.0814588	0.969542	43.7924	0.0955434	0.958513
scin	ENSDARG00000010728	566764	yes	30.8617	0.0413008	0.990466	71.8049	-0.125693	0.940574	no	no
scml4	ENSDARG00000017266	794170	yes	4.82958	-1.34719	0.680006	111.761	-1.06111	0.146804	no	no
scn12aa	ENSDARG00000090724	795688	yes	36.8386	-1.00201	0.581115	44.5862	-1.65479	0.169302	no	no
scn1lab	ENSDARG00000062744	559447	yes	36.494	-0.503818	0.769772	82.3673	-0.879943	0.377737	no	no
scn8ab	ENSDARG00000018032	793996	yes	32.5925	-1.15026	0.260891	316.272	-1.84809	0.00206512	no	no
scrt1a	ENSDARG00000100821	564658	yes	24.4739	-1.08826	0.488345	30.2705	-1.35718	0.301861	no	no
sctr	ENSDARG00000101077	100537567	yes	2.24459	-0.905828	1	3.21434	-0.686614	1	no	no
SDK2	ENSDARG00000102161	561852	yes	18.6964	-1.58683	0.0957362	23.2268	-1.63912	0.0423009	no	no
SEC14L1	ENSDARG00000101792	100535835	yes	44.143	-0.298806	0.854331	257.05	0.088052	0.911213	no	no
sec16b	ENSDARG00000099554	553356	yes	6.76209	-2.10391	0.278891	14.1442	-1.62254	0.380497	no	no
sec24a	ENSDARG00000104375	100000526	yes	528.091	0.644786	0.369785	1701.87	1.03835	0.0254361	no	yes
selenoi	ENSDARG00000060484	557632	yes	11.9683	-0.0338873	0.993362	147.962	-0.157232	0.861781	no	no
selenol	ENSDARG00000088444	100462964	yes	23.9184	0.923636	0.70447	61.2918	-0.575885	0.603054	no	no
sema3ab	ENSDARG00000042210	30267	no	246.244	3.11357	0.000695697	203.878	3.09157	0.000747266
sema3c	ENSDARG00000034300	553130	yes	2.25471	-3.19601	0.0891796	93.6691	-2.41299	0.00060246	no	no
sema4ba	ENSDARG00000074414	572261	yes	106.178	-0.274772	0.79566	117.829	-0.0688732	0.95394	no	no
SEMA4F	ENSDARG00000100308	556003	yes	47.439	0.150877	0.953431	1227.29	1.77421	0.000589309	no	yes
sema5ba	ENSDARG00000061471	556471	yes	61.6446	-0.336162	0.782816	120.338	-0.624962	0.387152	no	no
sema5bb	ENSDARG00000075648	100000009	yes	17.1149	-1.75565	0.119448	40.938	-2.13706	0.000279646	no	no
sema6a	ENSDARG00000102165	336060	no	14.7898	-1.17108	0.585375	24.7973	-0.0943732	0.965522
sema6ba	ENSDARG00000036626	562398	yes	11.6158	-2.02156	0.097991	23.234	-1.96623	0.00883053	no	no
sema6bb	ENSDARG00000061976	100148883	yes	16.7024	-0.458715	0.895328	643.072	-0.246668	0.675459	no	no
SEPT4	ENSDARG00000105271	100003446	yes	14.8436	1.13074	0.725817	31.2916	0.926373	0.612405	no	no
serbp1b	ENSDARG00000087421	797732	yes	70.0647	0.457205	0.735118	2347.89	0.47462	0.299541	no	no
serinc2l	ENSDARG00000053425	100329297	yes	11.6287	-0.290019	0.929808	287.249	-0.741993	0.337244	no	no
setbp1	ENSDARG00000093799	796785	yes	178.339	-1.21309	0.0384802	608.347	-1.91753	1.01873e-06	no	no
setd5	ENSDARG00000078576	570278	yes	100.994	-0.0415065	0.980047	750.452	0.00560352	0.995362	no	no
setx	ENSDARG00000022996	562474	yes	105.107	-0.0638266	0.963384	259.867	0.176945	0.803178	no	no
sf3b2	ENSDARG00000018049	570994	yes	2029.05	0.829205	0.0448476	2026.25	0.830215	0.0329588	no	no
SGCZ	ENSDARG00000106258	100334126	yes	10.2994	-1.78416	0.366609	10.2992	-2.14237	0.200871	no	no
sgk494b	ENSDARG00000086169	100537227	yes	11.9193	-0.965032	0.634318	22.218	-0.741701	0.632883	no	no
SGPP2	ENSDARG00000079608	100330698	yes	6.46735	-0.887291	0.757485	6.46736	-1.23189	1	no	no
sgsm1a	ENSDARG00000028857	100270734	yes	7.74082	-1.48396	0.34356	54.8253	-0.924268	0.287504	no	no
SH2B2	ENSDARG00000090421	100535524	yes	20.993	0.162055	0.954075	46.2042	0.35105	0.846572	no	no
sh2b3	ENSDARG00000069958	101884640	yes	42.2928	1.33167	0.369318	142.655	2.10005	0.0168063	no	yes
sh2d1aa	ENSDARG00000095348	797046	no
sh2d3ca	ENSDARG00000028099	558860	yes	29.0455	0.0476872	0.98485	96.0901	0.29279	0.743454	no	no
sh2d4a	ENSDARG00000041378	393219	yes				156.851	0.667492	0.391742	no	no
sh3bgr	ENSDARG00000021633	445130	yes	4.83614	-1.73907	0.515987	16.1115	-1.78447	0.188724	no	no
sh3bp2	ENSDARG00000021982	101886051	yes	58.7787	3.25944	0.00194253	1109.04	3.7592	2.72064e-12	yes	yes
sh3bp4	ENSDARG00000030104	569399	yes	224.276	2.18231	2.32581e-05	508.454	2.67381	2.60636e-06	yes	yes
shank1	ENSDARG00000060539	568908	yes	9.01737	-1.40666	0.385552	160.62	-2.05064	0.00529861	no	no
shank2	ENSDARG00000062325	567595	yes	75.059	0.407433	0.858302	183.191	-0.941174	0.222453	no	no
SHC3	ENSDARG00000098909	100332111	yes	30.9173	-0.251248	0.894402	128.722	0.0656301	0.956026	no	no
shisa2b	ENSDARG00000088232	100537021	yes	17.1281	0.920122	0.783549	121.248	-1.07785	0.0683668	no	no
shisa7a	ENSDARG00000062462	101883130	yes	17.7959	-0.874789	0.696053	23.6052	-0.853393	0.60554	no	no
shisal1a	ENSDARG00000045594	560435	yes	10.3417	-0.90658	0.677126	24.4766	-2.0507	0.0145423	no	no
SHKBP1	ENSDARG00000105050	562395	yes	46.6827	0.433227	0.794458	62.829	0.602967	0.608103	no	no
shmt2	ENSDARG00000104414	100144628	no	31.6392	2.36314	0.166781	31.6359	2.36271	0.158237
shoc2	ENSDARG00000040853	555476	yes	76.7568	0.219729	0.864441	1210.41	0.606975	0.140221	no	no
si:busm1-169i8.11	ENSDARG00000103252	110438755								no	no
si:busm1-228j01.4	ENSDARG00000088872	368844		3.2106	-0.00993908	1				no	no
si:busm1-52i16.2	ENSDARG00000058930	556021	yes	1.92596	-1.88242	0.59907				no	no
si:cabz01054396.2	ENSDARG00000089598	100537687	yes	55.2036	0.276541	0.863896	67.4892	0.496588	0.703464	no	no
si:cabz01071909.2	ENSDARG00000091841	560148	yes	6.43739	-1.20934	0.724705	7.40023	-1.239	1	no	no
si:cabz01071911.3	ENSDARG00000090998	103908660	yes	39.3333	0.0456093	0.985002	57.4333	0.117285	0.94399	no	no
si:cabz01080528.1	ENSDARG00000105657	110439911	no	67.7509	0.474854	0.666251	68.077	0.481896	0.623153
si:cabz01090193.1	ENSDARG00000105485	100330290	no
si:ch1073-13h15.3	ENSDARG00000099525	563241	yes	3.53733	0.641237	1	3.53819	-1.00631	1	no	no
si:ch1073-140o9.2	ENSDARG00000109726	101886206	yes	15.8451	-1.08274	0.570623	55.2527	-0.314302	0.839508	no	no
si:ch1073-186o8.3	ENSDARG00000094216	777726	yes	4.48918	-0.788377	0.872259	87.1495	0.224648	0.839508	no	no
si:ch1073-228j22.2	ENSDARG00000088985	100334514	yes	7.10166	-0.00236248	0.999827	8.72721	-0.102595	1	no	no
si:ch1073-335m2.2	ENSDARG00000074332	322667	yes	670.288	0.139915	0.888253	1099.56	0.280033	0.626503	no	no
si:ch1073-349o24.2	ENSDARG00000006863	100333283	yes	20.6497	-0.0481905	0.98861	26.4452	-0.275259	0.881563	no	no
si:ch1073-440p11.2	ENSDARG00000042643	100333886	yes	4.5175	-1.3241	0.750258	4.83501	-1.3059	1	no	no
si:ch1073-513e17.1	ENSDARG00000086739	571066	yes	6.44808	-1.03829	0.667938	13.1913	-0.375739	1	no	no
si:ch1073-66l23.1	ENSDARG00000097702	570021	yes				1.61363	-2.77014	1	no	no
si:ch211-106a19.1	ENSDARG00000022772	561797	yes	49.0637	-0.153814	0.923981	486.821	0.091363	0.912334	no	no
si:ch211-106h11.1	ENSDARG00000017720	559987	yes	11.9532	-1.03884	0.579937	19.6713	-1.99072	0.0183853	no	no
si:ch211-106h11.3	ENSDARG00000027360	497580	yes	2.58143	-1.70395	0.746066	40.4221	0.0710393	0.975847	no	no
si:ch211-106k21.5	ENSDARG00000086052	796902	yes	10.3454	0.14133	0.971596	1027.15	2.68199	2.36222e-08	no	yes
si:ch211-113a14.19	ENSDARG00000113481	100148591	yes	208.223	1.19408	0.0926561	110.42	1.11332	0.28656	no	no
si:ch211-113a14.19	ENSDARG00000111536	100148591	yes				110.42	1.11332	0.28656	no	no
si:ch211-113a14.19	ENSDARG00000113707	100148591	yes				110.42	1.11332	0.28656	no	no
si:ch211-113a14.19	ENSDARG00000115875	100334934	yes				51.0767	1.13516	0.432508	no	no
si:ch211-113a14.19	ENSDARG00000109926	100148591	yes				110.42	1.11332	0.28656	no	no
si:ch211-113a14.22	ENSDARG00000114895	560748	yes				144.575	1.05928	0.210632	no	no
si:ch211-113a14.24	ENSDARG00000051718	573073	yes	64.508	0.183096	0.888515	71.6105	0.400881	0.713432	no	no
si:ch211-114c12.5	ENSDARG00000092931	565476	yes	1.28869	-2.00519	1	3.22293	-1.541	1	no	no
si:ch211-114l13.12	ENSDARG00000088019	100537348	yes	9.96055	0.781032	0.866614	32.9087	2.21559	0.203465	no	no
si:ch211-114m9.1	ENSDARG00000102424	567298	yes	116.391	0.865603	0.292119	446.044	1.26563	0.0145699	no	yes
si:ch211-114n24.6	ENSDARG00000036700	795591	yes	1859.62	0.718485	0.307721	1827.63	0.718251	0.248235	no	no
si:ch211-117c19.1	ENSDARG00000104260	556083	yes	2.24459	-2.59601	0.421454	7.70418	-1.6914	0.569063	no	no
si:ch211-117c9.1	ENSDARG00000090179	101885029	yes				19.3032	0.145635	0.952131	no	no
si:ch211-119o8.6	ENSDARG00000026972	556659	yes	7.72868	-1.70394	0.28896	18.7215	-0.55206	0.789889	no	no
si:ch211-120g10.1	ENSDARG00000090930	556805	yes	6.10662	0.785365	0.863016	172.992	-0.468548	0.590377	no	no
si:ch211-127d4.3	ENSDARG00000059636	560957	yes	14.4691	-1.80732	0.246939	28.7126	-1.41417	0.111449	no	no
si:ch211-128m15.3	ENSDARG00000104860	561377	yes	9.02489	-0.922164	0.761256	15.7819	-1.03327	0.650843	no	no
si:ch211-12e13.1	ENSDARG00000091930	567996	yes	6.46735	0.863331	0.844026	7.43465	0.0630824	1	no	no
si:ch211-130m23.3	ENSDARG00000057395	558547	yes	27.0326	2.80388	0.120813	119.109	2.77009	0.022911	no	yes
si:ch211-132b12.2	ENSDARG00000094946	571877	no	20.9086	1.84995	0.331483	20.9198	1.85067	1
si:ch211-132e22.4	ENSDARG00000088329	101885497	no	0	-6.28266	0.0489505	0	-6.28305	1
si:ch211-132g1.1	ENSDARG00000040250	101884448	yes				10.3194	-0.249632	1	no	no
si:ch211-132g1.6	ENSDARG00000093102	103911758	no	7.11745	1.87226	0.700861
si:ch211-133l5.8	ENSDARG00000027676	100005423	yes	0	-4.95126	1	50.7586	0.056991	0.977573	no	no
si:ch211-133n4.7	ENSDARG00000095424	101885926	yes	3.52923	3.34667	1				no	no
si:ch211-135n15.3	ENSDARG00000088189	100330743	yes	16.1761	0.68986	0.840352	26.5158	0.270715	0.909931	no	no
si:ch211-139n6.10	ENSDARG00000110071	108179083	no
si:ch211-139n6.11	ENSDARG00000116465	100003630	no
si:ch211-139n6.3	ENSDARG00000093230	570095	yes	6.73579	-0.939628	0.796777	24.8263	0.265644	0.891204	no	no
si:ch211-13k12.2	ENSDARG00000038121	565819	yes	149.269	0.193944	0.852857	657.77	0.206047	0.747006	no	no
si:ch211-141e20.2	ENSDARG00000093349	100150732	yes	5.13453	-0.763838	0.847251	16.4027	-0.463369	0.827658	no	no
si:ch211-147m6.2	ENSDARG00000103769	101883900	yes							no	no
si:ch211-147m6.3	ENSDARG00000099068	108179145	yes				2.56806	-2.05482	1	no	no
si:ch211-149l1.2	ENSDARG00000079501	571514	yes	14.2052	-0.158119	0.969873	26.4483	-0.55238	0.681933	no	no
si:ch211-14a11.2	ENSDARG00000093457	110438205	yes	4.18339	-0.113809	0.983783	103.435	1.49108	0.165637	no	no
si:ch211-14i3.2	ENSDARG00000097323	103911825	yes	10.6641	-1.06366	0.575635	9.04972	-1.6512	0.272953	no	no
si:ch211-150d5.3	ENSDARG00000093384	101886875	yes	1.61339	-2.71967	0.451485	1.61214	-2.72165	1	no	no
si:ch211-152f2.3	ENSDARG00000043445	100148735	no	2.24459	-0.369098	1	2.8948	0.845396	1
si:ch211-152f22.4	ENSDARG00000090910	101884418	yes	9.36015	-0.35301	0.895144	12.2625	-0.309141	1	no	no
si:ch211-152p23.2	ENSDARG00000094519	101884065	yes	1.92596	1.57211	1	17.7799	0.287617	0.919628	no	no
si:ch211-154c21.1	ENSDARG00000100772	110440212	yes	3.52721	-2.87016	0.232581	13.5051	-2.06286	0.208978	no	no
si:ch211-154e10.1	ENSDARG00000094605	445235	yes	2.24661	-2.59557	0.361707	7309.59	3.2706	7.48732e-17	no	yes
si:ch211-154o6.2	ENSDARG00000089032	568558	yes	64.7426	-0.265888	0.833084	255.489	-0.174637	0.835095	no	no
si:ch211-156l18.4	ENSDARG00000116455	110440092	yes				5.47418	0.276714	1	no	no
si:ch211-156p11.1	ENSDARG00000071604	110437710	yes							no	no
si:ch211-158d24.2	ENSDARG00000078536	560805	yes	11.5924	-2.2451	0.0532163	14.812	-2.21727	0.0492387	no	no
si:ch211-161c3.5	ENSDARG00000100263	101883575	yes	80.154	-1.06877	0.20761	123.64	-0.835669	0.37275	no	no
si:ch211-163l21.11	ENSDARG00000095855	101886753	yes	0	-6.71868	0.00388602	16.1476	-1.29931	0.285933	no	no
si:ch211-163m17.4	ENSDARG00000078398	110438987	no	6.10055	0.0685268	0.990649	10.6304	-0.632544	1
si:ch211-169p10.1	ENSDARG00000012449	799619	yes	145.352	2.70549	0.000535844	158.235	2.63244	0.000434566	yes	yes
si:ch211-171b20.3	ENSDARG00000094794	571370	yes	11.6438	1.36461	0.677815	11.6406	-0.383396	1	no	no
si:ch211-173d10.4	ENSDARG00000087756	108191769	yes	7.7018	2.99466	0.487765	15.1145	1.37991	1	no	no
si:ch211-175l6.2	ENSDARG00000100721	561314	yes	0.968036	-3.27594	0.317855	0.967286	-3.17359	1	no	no
si:ch211-176g13.8	ENSDARG00000091428	100536596	yes	4.18673	-1.34678	0.684579	3.22429	-2.1395	1	no	no
si:ch211-180f4.1	ENSDARG00000077112	100144405	yes	7.73273	-2.15876	0.0859297	23.1611	-1.97989	0.0629032	no	no
si:ch211-181l5.2	ENSDARG00000058906	563994	yes	0	-6.25455	0.0279764	0	-7.09085	1	no	no
si:ch211-193c2.2	ENSDARG00000067546	565272	yes	10.6764	0.724667	0.822455	17.4202	0.394667	1	no	no
si:ch211-194e15.5	ENSDARG00000061804	100034579	yes	106.372	-1.06276	0.132878	177.636	-1.11272	0.0446167	no	no
si:ch211-194g2.4	ENSDARG00000094648	110438575	yes							no	no
si:ch211-194m7.5	ENSDARG00000098799	101883669	yes	2.89602	-2.04504	0.439928	4.18162	-1.82842	1	no	no
si:ch211-196f5.2	ENSDARG00000041492	556372	yes	3.20858	-2.07731	0.457192	38.7769	0.114548	0.95394	no	no
si:ch211-196g2.4	ENSDARG00000077087	103908668	yes	45.2332	-0.25199	0.89273	179.887	-0.080042	0.934053	no	no
si:ch211-197l9.5	ENSDARG00000086679	101887148	yes	5.16154	0.411398	0.935109	15.4712	-0.175749	0.944821	no	no
si:ch211-199o1.2	ENSDARG00000056210	798846	yes	68.0519	-0.0416089	0.985987	195.029	0.784557	0.551047	no	no
si:ch211-1e14.1	ENSDARG00000063361	556850	yes	140.385	-0.643441	0.432945	174.261	-0.531764	0.509254	no	no
si:ch211-1f22.10	ENSDARG00000096619	100006104	no
si:ch211-1i11.3	ENSDARG00000104760	100005496	yes	46.9766	-0.347147	0.830367	109.181	-0.26344	0.796715	no	no
si:ch211-200p22.4	ENSDARG00000110266	100005187	yes				16.7581	-0.662505	0.715793	no	no
si:ch211-203b20.4	ENSDARG00000091790	100004085	yes	4.83614	-2.12016	0.409118	4.83359	-2.20683	1	no	no
si:ch211-207b24.4	ENSDARG00000104027	795632	yes	11.6426	0.362507	0.928348	13.8948	-1.11342	0.500246	no	no
si:ch211-207e14.4	ENSDARG00000089004	559686	yes	45.3845	-1.79176	0.0702553	40.2413	-1.88581	0.0407984	no	no
si:ch211-209f23.6	ENSDARG00000077309	101882182	yes				0.643436	-4.04952	1	no	no
si:ch211-209f23.7	ENSDARG00000099948	798805	no	0	-5.38486	1	11.6579	0.317515	1
si:ch211-209n20.1	ENSDARG00000099382	100149641	yes	9.36279	-0.7883	0.795584	6.76822	-1.19706	1	no	no
si:ch211-210g13.5	ENSDARG00000062575	327464	yes	30.9874	-0.31126	0.879848	43.9217	-0.405391	0.790672	no	no
si:ch211-214k5.6	ENSDARG00000087709	568600	yes	61.608	-0.956321	0.20815	92.6522	-0.755518	0.385523	no	no
si:ch211-217i17.1	ENSDARG00000100155	100332150	yes							no	no
si:ch211-219a15.3	ENSDARG00000087659	563077	yes	0.320656	-5.25709	0.0440113	20.6631	-0.55646	0.736107	no	no
si:ch211-220i18.4	ENSDARG00000030262	798392	yes				9.36362	-1.81651	0.356188	no	no
si:ch211-221f10.2	ENSDARG00000076547	336563	yes	10.9407	-2.14725	0.217533	18.029	-1.9655	0.23481	no	no
si:ch211-221n20.1	ENSDARG00000110807	110438206	yes	1.9432	-1.80669	0.743908	10.3567	-0.491123	1	no	no
si:ch211-221n20.4	ENSDARG00000111367	108180292	yes	2.58143	-1.64394	0.699638	9.03674	-0.192923	1	no	no
si:ch211-222k6.2	ENSDARG00000087046	556142	yes	1.28262	-3.13855	0.387064	46.074	-0.858834	0.315118	no	no
si:ch211-223a10.1	ENSDARG00000075225	101884554	yes	35.1358	-0.22305	0.892752	62.5682	0.340945	0.742271	no	no
si:ch211-223p8.8	ENSDARG00000092650	100004731	no
si:ch211-229c8.13	ENSDARG00000067828	793176	yes	1.60328	-3.64045	0.110214	12.929	-1.08821	0.538661	no	no
si:ch211-22d5.2	ENSDARG00000079031	797096	yes	10.9376	-1.83788	0.342069	27.4202	-2.02355	0.0466165	no	no
si:ch211-231m23.4	ENSDARG00000041292	100333904	yes	1.28869	-2.75844	0.351404	1.28829	-2.75853	1	no	no
si:ch211-234c11.2	ENSDARG00000093041	100330526	yes				27.0472	-1.24369	0.370472	no	no
si:ch211-234h8.7	ENSDARG00000028583	561627	yes	15.1745	-0.118722	0.96475	112.153	0.0113685	0.994051	no	no
si:ch211-236g6.1	ENSDARG00000071590	100007963	yes	8.01639	-0.91844	0.82665	31.5358	-1.90634	0.0868253	no	no
si:ch211-236k19.2	ENSDARG00000052165	557579	yes	4.51346	1.47821	1	4.51116	1.47689	1	no	no
si:ch211-236p22.1	ENSDARG00000077905	565916	yes	49.7107	-0.986017	0.290152	52.2788	-1.02716	0.229603	no	no
si:ch211-238p8.31	ENSDARG00000114356	108191511	yes				2.90186	-0.29758	1	no	no
si:ch211-238p8.35	ENSDARG00000114771	108191515	yes							no	no
si:ch211-238p8.35	ENSDARG00000112619	108191516	yes							no	no
si:ch211-239f4.1	ENSDARG00000052766	566318	yes	25.7748	-1.22767	0.300716	44.4586	-0.628937	0.622638	no	no
si:ch211-23l10.3	ENSDARG00000073998	101884217	yes	3.88319	-1.69961	0.590351	15.4697	-2.33715	0.00459286	no	no
si:ch211-241b2.5	ENSDARG00000100899	100536137	yes	2.58737	-1.32246	0.739789	2.58664	-2.70036	1	no	no
si:ch211-250e5.2	ENSDARG00000061496	796449	yes	2.57131	-1.32865	0.725817	33.2565	0.346977	0.838803	no	no
si:ch211-250g4.3	ENSDARG00000092945	557772	yes	411.427	0.982481	0.551425	5752.33	0.275089	0.924991	no	no
si:ch211-253p14.2	ENSDARG00000013907	570141	yes	9.04711	0.345338	0.930782	9.04684	-0.194321	1	no	no
si:ch211-255f4.5	ENSDARG00000103477	100535814	yes	4.82602	-0.903334	0.798821	61.2156	-0.1042	0.937367	no	no
si:ch211-255f4.9	ENSDARG00000099317	568851	yes				87.1349	0.05836	0.964112	no	no
si:ch211-256e16.6	ENSDARG00000079603	110439304	yes	0.966013	-2.81258	1	1.28687	-4.36591	1	no	no
si:ch211-256e16.7	ENSDARG00000096821	101886370	yes							no	no
si:ch211-261n11.3	ENSDARG00000090577	561036	no	0.645358	-3.64635	0.286644	8.36183	-1.47584	0.495979
si:ch211-261p9.4	ENSDARG00000076798	100330300	yes	19.3823	1.20714	0.609867	119.744	0.208299	0.838856	no	no
si:ch211-262i1.4	ENSDARG00000018671	101884492	no	6.10376	-0.40553	0.920551	4.17596	-0.702078	1
si:ch211-263k4.2	ENSDARG00000078324	796720	yes	107.006	0.170907	0.924766	688.613	0.517856	0.491289	no	no
si:ch211-263m18.4	ENSDARG00000093353	327130	yes				6.12472	-1.24637	1	no	no
si:ch211-263p13.7	ENSDARG00000077622	101883296	yes				22.9891	0.508212	0.870311	no	no
si:ch211-264e16.1	ENSDARG00000068947	101886093	yes	12.2463	0.0331544	0.993108	19.0337	0.0976157	0.967736	no	no
si:ch211-272b8.6	ENSDARG00000091607	101884284	yes	7.10962	-0.898395	0.772502	9.68584	-0.927396	1	no	no
si:ch211-279g13.1	ENSDARG00000093992	110438272	no				4.84222	-1.14295	1
si:ch211-283h6.4	ENSDARG00000059459	100001127	no
si:ch211-284e13.4	ENSDARG00000060330	566919	yes	20.3074	-0.873302	0.636848	65.0817	-1.09721	0.156329	no	no
si:ch211-285c6.1	ENSDARG00000076257	556924	yes	2.90411	-1.22648	0.802527	2.90186	-1.22762	1	no	no
[truncated: 827 more rows]

## Sheet: 4 PdgfrbPos
Ens95 Gene Symbol	Ensdarg	NCBIid	RefSeq 3pUTR	RefSeq CDS	RefSeq Stop	Ens95 pdgfrb Lg2Fc	Ens95 pdgfrb Padj	Ens95 pdgfrbPos Avg	RefSeq Pdgfrb Lg2Fc	RefSeq Pdgfrb Padj	RefSeq PdgfrbPos Avg	Ens95 enriched	RefSeq enriched
aak1a	ENSDARG00000011855	568999	yes	yes	yes	-1.67162	0.0588841	13.2884	-1.16276	0.0439647	91.2324	no	no
aatkb	ENSDARG00000104442	555739	yes	yes	yes	-0.189915	0.822909	102.798	-0.147642	0.853602	726.882	no	no
abcb6b	ENSDARG00000074254	100004801	yes	yes	yes	0.278042	1	5.7773	0.52776	0.571504	116.977	no	no
abcc5	ENSDARG00000061233	336147	yes	yes	yes	0.722119	0.146388	659.299	0.398424	0.429051	5417.02	no	no
abcc8b	ENSDARG00000077007	100329706	yes	yes	yes	-1.15659	0.177035	39.5608	-1.30082	0.0941935	45.1232	no	no
abcf3	ENSDARG00000089705	100331227	yes	yes	yes	0.095461	0.926585	75.2354	-0.0779053	0.935004	103.261	no	no
abcg2a	ENSDARG00000100075	735312	yes	yes	yes	-2.068	0.0105502	16.2164	-2.1672	0.00402267	24.0503	no	no
abcg4a	ENSDARG00000061047	564842	no	yes	yes	-0.758168	0.682049	8.83165	-0.665027	0.713314	10.452	no	no
abhd11	ENSDARG00000069501	446169	yes	yes	yes	-1.03024	1	3.25525	-0.419188	0.555863	207.938	no	no
abi3bpa	ENSDARG00000062156	101884149	yes	yes	yes	1.30125	0.0777087	290.566	1.34202	0.0380872	366.792	no	yes
abo	ENSDARG00000019207	563897	no	yes	yes	-0.88229	1	3.26477	-0.715403	1	2.90953	no	no
abr	ENSDARG00000095180	565190	yes	yes	yes	0.684976	0.588435	29.3581	1.0649	0.011859	634.343	no	yes
acanb	ENSDARG00000045799	559593	yes	yes	yes	3.20072	9.19631e-06	192.831	4.37623	1.1507e-14	557.071	yes	yes
acer2	ENSDARG00000077782	100331179	yes	yes	yes	0.832221	1	6.16216	0.080041	0.972411	14.761	no	no
acer3	ENSDARG00000093366	555411	yes	yes	yes	-0.198751	0.925669	8.66303	-0.160379	0.937946	11.2082	no	no
ACKR2	ENSDARG00000086314	101887081	yes	yes	yes	-0.62032	0.701075	11.0191	-0.62063	0.657345	18.934	no	no
ackr4a	ENSDARG00000078729	100003167	yes	yes	yes	0.395636	0.863529	10.9883	1.44124	0.0932104	77.969	no	no
aco1	ENSDARG00000026376	568448	yes	yes	yes	0.952088	0.116874	127.756	0.706353	0.11412	599.569	no	no
acod1	ENSDARG00000069844	795305	no	yes	yes	-2.1415	0.127907	6.33128	-2.117	0.146949	6.31249	no	no
acot21	ENSDARG00000042513	562047	yes	yes	yes	-2.52824	1	1.31731	-0.701425	0.74717	6.85443	no	no
acoxl	ENSDARG00000020149	569104	yes	yes	yes	-0.375834	0.876469	9.75099	-0.202551	0.940371	11.3121	no	no
acp2	ENSDARG00000007244	503759	no	yes	no	0.978463	0.259508	91.0779	1.0047	0.253158	91.1758	no	no
acp7	ENSDARG00000102421	571830	yes	yes	yes	0.532349	0.704563	30.1303	-0.0921867	0.950577	43.4956	no	no
acsbg1	ENSDARG00000062077	100006023	yes	yes	yes	-1.45413	1	3.2299	-1.46088	1	3.21356	no	no
acsl3a	ENSDARG00000032079	567157	yes	yes	yes	-2.94046	0.125616	1.93794	-2.15437	1	2.57085	no	no
acss2l	ENSDARG00000069029	560020	yes	yes	yes	-0.219212	0.930492	12.1112	-0.230234	0.93022	12.0547	no	no
acvr2ab	ENSDARG00000104700	100331014	yes	yes	yes	-1.02609	0.47742	11.2935	0.175028	0.788566	1251.26	no	no
acvr2ba	ENSDARG00000044422	30457	yes	yes	yes	-0.051845	0.968825	50.903	-0.182172	0.763639	627.165	no	no
acvr2bb	ENSDARG00000103108	100331938	yes	yes	yes	-1.0201	0.319735	15.8111	-1.00372	0.251518	24.2697	no	no
acyp2	ENSDARG00000086271	101886626	yes	yes	yes	-1.06978	0.616154	8.91508	-1.09945	0.528628	11.164	no	no
adam10b	ENSDARG00000015502	393392	yes	yes	yes	0.0454842	0.978788	30.5475	0.151137	0.922988	34.0311	no	no
ADAM12	ENSDARG00000116062	101884222	yes	yes	yes	0.0075278	0.997205	9.03041				no	no
adamts1	ENSDARG00000103519	565145	yes	yes	yes	1.77084	0.0588632	78.1152	2.40949	3.21642e-06	2289.91	no	yes
adamts14	ENSDARG00000078494	101886422	yes	yes	yes	-0.341023	0.872519	9.84716	0.0970243	0.945461	39.1985	no	no
adamts15a	ENSDARG00000029124	569571	no	yes	yes	1.07009	0.0431983	247.876	1.07728	0.0428948	247.132	yes	yes
adamts16	ENSDARG00000074646	568792	yes	yes	yes	-0.10701	0.955954	16.1815	0.138883	0.909821	43.1806	no	no
adamts17	ENSDARG00000075555	101884120	yes	yes	no	0.320716	0.819578	22.8464	1.78798	4.77712e-05	709.007	no	yes
adamts3	ENSDARG00000060127	102467218	yes	yes	yes	2.02117	0.00120645	109.025	2.04541	0.000944481	188.906	yes	yes
adamts5	ENSDARG00000100307	565053	no	yes	yes	0.134765	0.922964	33.5748	0.16892	0.903545	33.7831	no	no
adamts6	ENSDARG00000041982	569099	yes	yes	yes	0.509659	0.650164	40.2814	0.500546	0.51825	85.989	no	no
ADAMTS7	ENSDARG00000102478	560364	yes	yes	yes	0.944032	0.173073	73.355	1.06469	0.0597563	131.505	no	no
adamts8a	ENSDARG00000007709	569618	yes	yes	yes	-0.0585862	0.975739	21.0608	0.774424	0.228263	203.46	no	no
adap2	ENSDARG00000070565	100331455	yes	yes	yes	-2.59339	0.0150154	4.62862	-1.6736	0.0238978	19.3887	no	no
adarb2	ENSDARG00000071823	558149	yes	yes	yes	-0.606334	0.681668	15.0112	-0.468534	0.708325	23.5251	no	no
adcy2a	ENSDARG00000058392	563724	yes	yes	yes	-0.0318947	0.982048	38.3233	0.118426	0.929436	49.2838	no	no
adcy3a	ENSDARG00000077145	571825	yes	yes	yes	-0.411265	0.791765	14.8727	-0.192725	0.897828	30.1759	no	no
adcy8	ENSDARG00000031783	100148976	yes	yes	yes	-3.4916	0.000129387	7.19457	-3.42382	0.000145322	10.7275	no	no
adcy9	ENSDARG00000100869	100333702	yes	yes	yes	-0.0329026	0.980327	39.7205	1.58224	9.99546e-05	823.253	no	yes
add1	ENSDARG00000103962	555511	yes	yes	yes	1.08315	0.0411552	411.278	0.998831	0.012978	1985.1	yes	no
adgra2	ENSDARG00000076994	560700	no	yes	yes	1.06578	0.0581671	182.519	0.953972	0.132491	137.743	no	no
adgrd2	ENSDARG00000103067	571770	yes	yes	yes	-0.779201	0.65071	9.48192	-1.38003	0.226459	16.5979	no	no
adgre15	ENSDARG00000096588	100536619	yes	yes	yes	-1.58562	0.42002	4.06297	-1.27278	0.35381	7.27656	no	no
adgre16	ENSDARG00000096622	110437794	yes	yes	yes				-0.717726	1	3.32154	no	no
adgre5b.3	ENSDARG00000112943	100536657	yes	yes	yes	0.332875	0.678078	112.174	1.10957	0.038713	383.549	no	yes
adgrg2a	ENSDARG00000088137	101882832	yes	yes	yes	-0.715426	0.575491	25.6416	-0.422622	0.667786	78.6316	no	no
adgrl1a	ENSDARG00000089292	562531	yes	yes	yes	-1.89558	0.0260136	21.3388	-1.7453	0.00101239	51.5151	no	no
adora1a	ENSDARG00000070056	100007535	yes	yes	yes	-1.08837	1	3.29964	-1.31224	0.211485	11.6222	no	no
adora1b	ENSDARG00000075694	100150997	no	yes	yes	-1.2578	0.51196	5.03932	-1.22789	0.547038	5.02706	no	no
adra1ab	ENSDARG00000027638	557259	yes	yes	yes	-2.3826	0.0107481	8.81582	-3.41186	1.86327e-06	8.51261	no	no
adra1ba	ENSDARG00000011317	100149100	yes	yes	yes	-0.767271	0.655017	9.32698	-0.672844	0.60945	16.1859	no	no
adra2a	ENSDARG00000040841	266750	yes	yes	yes	0.350207	0.836899	18.7539	0.471722	0.561701	86.2515	no	no
adra2db	ENSDARG00000054667	266755	no	yes	yes	-0.210014	0.926585	8.23114	-0.221243	0.92723	8.19789	no	no
aff4	ENSDARG00000001857	556421	yes	yes	yes	0.230735	0.848186	197.78	0.702597	0.0793302	2036.55	no	no
agap3	ENSDARG00000087822	324332	yes	yes	yes	-0.623505	0.390134	52.6077	-0.160597	0.80659	572.891	no	no
agtr1a	ENSDARG00000018616	794575	yes	yes	yes	1.61349	0.250653	24.159	2.79936	0.00488923	61.7883	no	yes
ahrra	ENSDARG00000099702	641291	yes	yes	yes	-0.438761	0.867607	5.58592	-0.339381	0.805205	21.2063	no	no
aifm3	ENSDARG00000062780	100150876	yes	yes	yes	-0.842526	0.739142	6.48515	-1.6134	0.328086	8.05988	no	no
aipl2	ENSDARG00000098164	100534741	yes	yes	yes	-1.77883	0.104104	12.8121	-1.47262	0.195067	25.1443	no	no
ak1	ENSDARG00000001950	445486	yes	yes	yes	1.58885	0.000936614	1720.69	1.58632	0.00089888	1844.39	yes	yes
akap10	ENSDARG00000059549	566920	yes	yes	yes	-0.466572	0.816201	11.7386	0.193161	0.784305	554.259	no	no
AL645691.1	ENSDARG00000102561	100536867	yes	yes	yes	0.664871	1	3.99632	0.840862	1	8.54523	no	no
AL831726.2	ENSDARG00000104185	101882696	yes	yes	yes	-1.21859	1	1.61495	-0.662363	1	4.22093	no	no
AL831768.1	ENSDARG00000100923	100534861	yes	yes	yes	-0.204085	0.934851	8.05085	0.0130807	0.995694	9.69408	no	no
AL844172.1	ENSDARG00000113841	559910	yes	yes	yes				-1.88385	1	3.30017	no	no
AL929217.1	ENSDARG00000059891	562831	yes	yes	yes	-0.0235695	0.993195	8.47808	0.0244381	0.992111	8.14592	no	no
AL935044.1	ENSDARG00000088051	100537716	yes	yes	yes				-0.0782362	1	6.26052	no	no
AL935199.1	ENSDARG00000077746	100001479	yes	yes	yes	0.0722072	0.972259	13.1278	-0.134729	0.927234	31.7975	no	no
AL935300.3	ENSDARG00000098661	101885450	yes	yes	yes	-0.949114	1	3.26477	-0.870359	1	5.19771	no	no
AL954146.1	ENSDARG00000038891	560023	yes	yes	yes	-5.6689	1	0	-5.94539	1	0	no	no
AL954361.1	ENSDARG00000078364	570571	yes	yes	yes	0.0452512	1	4.93887	0.223343	0.930299	10.452	no	no
aldh3b2	ENSDARG00000035606	557008	yes	yes	yes	-1.94143	0.217241	4.35633	0.107141	0.88159	295.696	no	no
alox5a	ENSDARG00000057273	567204	yes	yes	yes	0.232025	0.892622	17.3906	-0.510446	0.638711	35.3754	no	no
ALOXE3	ENSDARG00000073781	794132	yes	yes	yes	-0.568906	0.817014	5.55212	-0.218493	0.923652	9.56733	no	no
alp3	ENSDARG00000098063	100330410	no	yes	yes	0.05762	0.981487	8.60911	0.104981	0.967224	8.5793	no	no
als2a	ENSDARG00000075111	557014	yes	yes	yes	0.426592	0.57113	83.3702	0.721617	0.231291	285.743	no	no
alx1	ENSDARG00000062824	565176	no	yes	yes	2.17826	0.000716048	104.531	2.19449	0.000876996	104.596	yes	yes
amigo1	ENSDARG00000079620	100144409	yes	yes	yes	-1.70687	0.198396	6.53692	-1.26962	0.129421	22.3655	no	no
amigo3	ENSDARG00000074469	100000131	yes	yes	yes	-1.95244	0.0781292	7.60634	-2.08677	0.000254176	34.4067	no	no
ampd2a	ENSDARG00000104491	100330772	yes	yes	yes	0.767519	0.35331	65.9357	1.09175	0.0124879	1796.08	no	yes
angpt2a	ENSDARG00000014946	101101687	no	yes	yes	-0.73368	0.75132	6.51895	-0.703206	0.768972	6.48775	no	no
angpt2b	ENSDARG00000053906	114408	yes	yes	yes	3.24886	4.50921e-08	161.478	3.36208	1.74314e-08	165.39	yes	yes
ank2a	ENSDARG00000009026	568926	yes	yes	yes	-2.07168	1.49665e-05	58.4472	-2.66552	1.65556e-09	104.482	no	no
ankrd11	ENSDARG00000051886	327352	yes	yes	yes	0.216902	0.714717	6141.8	0.284782	0.587687	9196.64	no	no
ankrd13a	ENSDARG00000061901	556837	yes	yes	yes	0.578129	0.554338	38.6839	0.263408	0.738082	192.132	no	no
ankrd2	ENSDARG00000002722	101886079	no	yes	yes				-2.52976	1	0.99005	no	no
ankrd27	ENSDARG00000089207	386887	no	yes	yes	-0.395746	0.812168	14.3906	-0.187059	0.917065	18.3767	no	no
ankrd33aa	ENSDARG00000055638	557568	yes	yes	yes	-1.2257	0.113748	49.3407	-1.25513	0.0972826	54.1436	no	no
ankrd33bb	ENSDARG00000015589	557905	yes	yes	yes	-1.55402	0.340177	4.32253	-0.90921	0.171776	61.2937	no	no
ankrd34ba	ENSDARG00000077086	560938	yes	yes	yes	-0.582812	0.818165	6.94548	-0.258778	0.85297	25.1024	no	no
ankrd34bb	ENSDARG00000061641	565548	yes	yes	yes	-0.352569	0.802499	21.0533	-0.315832	0.767915	73.8644	no	no
ankrd44	ENSDARG00000026028	561373	yes	yes	yes	-0.614404	0.667464	14.1253	0.801565	0.119443	546.724	no	no
anks1aa	ENSDARG00000062396	100334911	yes	yes	yes	0.961985	0.666533	12.4311	0.813244	0.694811	14.023	no	no
ano1	ENSDARG00000102335	407698	yes	yes	yes	1.89523	0.0334747	58.8296	1.79645	0.000354135	551.415	yes	yes
ano5a	ENSDARG00000015731	100534737	yes	yes	yes	0.13353	0.940463	20.6581	0.0131197	0.991832	46.6402	no	no
ANO7	ENSDARG00000104834	556876	yes	yes	yes	0.0513395	0.986387	6.57179	-0.313427	0.898566	7.20379	no	no
ano8a	ENSDARG00000076265	562947	yes	yes	yes	-1.51144	0.184532	12.5483	-1.72826	0.0375124	17.2452	no	no
antxr1a	ENSDARG00000025672	793153	yes	yes	yes	1.14334	0.223705	33.1382	1.487	0.0243145	90.717	no	yes
antxr2b	ENSDARG00000063011	560841	no	yes	yes	-0.182391	0.940579	7.95147	-0.240636	0.923982	7.92186	no	no
ap3b1a	ENSDARG00000100082	563316	yes	yes	no	0.934216	0.109872	153.382	0.771714	0.138885	534.975	no	no
AP3B2	ENSDARG00000105296	100000165	no	yes	no	-3.30748	0.000138522	13.0168	-3.46459	6.50733e-05	12.9576	no	no
ap5z1	ENSDARG00000078111	100537934	yes	yes	yes	-0.254853	0.832948	40.5245	-0.14222	0.896539	65.3065	no	no
apbb3	ENSDARG00000053771	101883158	yes	yes	yes	-1.91026	0.232625	4.24326	-2.01268	0.00548281	14.7737	no	no
apc2	ENSDARG00000063007	565771	no	yes	yes	-2.73982	9.55324e-05	20.3974	-2.74443	0.000117908	20.3202	no	no
apeh	ENSDARG00000008703	100333019	yes	yes	yes	0.342004	0.776804	39.4524	0.215744	0.798992	220.508	no	no
apobec2b	ENSDARG00000113992	567047	no	yes	yes	0.643399	0.686462	23.1699	0.59403	0.728913	22.4504	no	no
aqp3b	ENSDARG00000069518	568049	no	yes	yes							no	no
aqr	ENSDARG00000016775	393436	yes	yes	yes	0.0169633	0.986593	147.62	-0.0642607	0.944913	212.554	no	no
arf4b	ENSDARG00000100339	550402	yes	yes	yes	0.424789	0.785214	49.3668	0.584304	0.651069	88.6829	no	no
arfgap1	ENSDARG00000101616	100149572	yes	yes	yes	-0.0354593	0.989734	9.64354	0.243563	0.72845	389.233	no	no
arfgef3	ENSDARG00000077656	562652	yes	yes	yes	-0.723376	0.5351	26.8709	-1.14208	0.121256	46.1005	no	no
arg1	ENSDARG00000057429	570368	no	yes	yes	-0.142355	1	5.18474	-0.154618	1	5.15902	no	no
arhgap18	ENSDARG00000074740	100004252	no	yes	yes	0.477164	0.682154	40.459	0.61596	0.581171	45.1711	no	no
ARHGAP22	ENSDARG00000076434	555573	yes	yes	yes	-1.5616	0.0956704	16.3609	-1.09597	0.303082	24.4418	no	no
arhgap22	ENSDARG00000021255	562503	yes	yes	yes	-0.736809	0.625591	11.4801	-1.19676	0.0853508	52.6743	no	no
arhgap25	ENSDARG00000061784	562468	yes	yes	yes	-0.355872	0.859782	10.7982	-0.742707	0.599458	15.9991	no	no
arhgap32b	ENSDARG00000074184	569434	yes	yes	yes	-0.744776	0.186335	97.4327	-0.0566592	0.951644	928.449	no	no
arhgap39	ENSDARG00000100007	101884459	yes	yes	yes	-1.47697	0.280514	6.93073	-0.97904	0.364111	18.4166	no	no
arhgap42b	ENSDARG00000010654	569534	yes	yes	yes	0.708862	0.587751	20.8885	0.528347	0.638711	44.6927	no	no
arhgap44	ENSDARG00000104549	100333556	yes	yes	yes	-1.62792	0.366701	4.54721	-1.73979	0.272764	6.14907	no	no
arhgef10lb	ENSDARG00000074244	567649	yes	yes	yes	-1.63105	0.0241008	18.2073	-1.16209	0.112246	30.1344	no	no
arid3a	ENSDARG00000070843	562799	yes	yes	yes	-0.00204367	0.998429	54.8759	-0.0939347	0.949511	40.4221	no	no
arl15b	ENSDARG00000057995	560030	yes	yes	yes	-0.476379	0.778079	11.701	0.699815	0.118362	665.012	no	no
ARMC6	ENSDARG00000103770	555425	yes	yes	yes	0.145007	0.939157	18.3139	0.294752	0.735374	88.0849	no	no
arrb1	ENSDARG00000043241	553266	no	yes	yes	0.889016	0.342626	41.8086	0.911511	0.349881	42.0118	no	no
arrdc1b	ENSDARG00000079839	570029	yes	yes	yes	-0.803215	1	3.28167	-0.598734	0.365247	97.5301	no	no
ARSB	ENSDARG00000108788	100538007	no	yes	no	-1.03363	1	2.30425	-1.14278	1	3.28487	no	no
arsh	ENSDARG00000002299	100332997	yes	yes	yes	-0.187163	0.924571	12.2857	0.474995	0.665161	49.5428	no	no
arsib	ENSDARG00000117075	563783	yes	yes	yes	-0.940293	0.693198	5.58378	-0.288212	0.828941	27.4154	no	no
artnb	ENSDARG00000093714	101883396	yes	yes	yes	1.3405	0.227764	49.6742	0.958812	0.226093	95.4063	no	no
asb15b	ENSDARG00000045863	568579	no	yes	yes	0.660434	0.763063	12.07	0.648613	0.770987	12.0134	no	no
ascc3	ENSDARG00000086678	100332599	no	yes	no	-0.451785	0.667825	41.192	-0.393129	0.72422	43.5262	no	no
asic1c	ENSDARG00000098428	407670	yes	yes	yes	-0.259291	0.865708	19.5383	-1.39555	0.0355313	34.3005	no	no
aspscr1	ENSDARG00000105321	550237	yes	yes	yes	0.204739	0.783472	147.374	0.0880409	0.914525	196.355	no	no
atad2b	ENSDARG00000060537	100331225	yes	yes	yes	-0.462889	0.484428	130.659	-0.520587	0.375774	190.476	no	no
atad3	ENSDARG00000086848	403004	yes	yes	yes	-1.36249	1	2.69913	-0.855686	0.12409	205.142	no	no
atf2	ENSDARG00000023903	100006516	yes	yes	yes	-0.483908	0.81581	10.7358	-0.936924	0.151066	76.7823	no	no
atg16l2	ENSDARG00000043238	100034627	yes	yes	yes	0.0286544	0.989495	14.4325	0.536476	0.738878	21.8155	no	no
ATG2A	ENSDARG00000101507	101883461	yes	yes	yes	0.070186	0.95859	78.9067	0.083142	0.952393	89.9395	no	no
atg4db	ENSDARG00000088145	100329304	no	yes	yes	0.213563	1	6.17275	0.139101	1	4.85903	no	no
atmin	ENSDARG00000068601	571606	yes	yes	yes	-0.265881	0.892475	16.669	-0.122663	0.909781	76.815	no	no
atp7b	ENSDARG00000058145	556499	yes	yes	yes	-0.920498	0.486954	12.1239	-0.753689	0.548678	17.3059	no	no
atp8b5a	ENSDARG00000062040	100330945	yes	yes	yes	1.13033	0.100613	113.693	1.30427	0.0327194	170.433	no	yes
atrnl1a	ENSDARG00000077188	792417	yes	yes	yes	0.90518	0.0866666	244.678	0.969216	0.062662	292.623	no	no
atxn1a	ENSDARG00000061687	557340	yes	yes	yes	-0.67002	0.441673	67.5271	-0.0700501	0.935663	297.731	no	no
atxn1l	ENSDARG00000086977	793927	yes	yes	yes	-0.295584	0.838999	29.5214	-0.325169	0.768697	65.3631	no	no
atxn3	ENSDARG00000099274	394079	yes	yes	yes	-0.454146	0.844209	9.40946	0.0860364	0.930615	142.044	no	no
avpr2aa	ENSDARG00000007436	100007585	yes	yes	yes	1.52743	0.298671	15.5515	1.99485	3.49162e-06	242.973	no	yes
avpr2l	ENSDARG00000076690	100004053	yes	yes	yes	0.0638615	1	5.01504	-0.106854	0.968447	8.03736	no	no
AXL	ENSDARG00000112045	100330721	yes	yes	no	0.984916	0.340531	29.7264	0.377591	0.747323	39.1315	no	no
b3galt1a	ENSDARG00000079700	559521	yes	yes	yes	-0.415992	0.716638	28.8992	-0.306045	0.705926	93.0153	no	no
b3galt4	ENSDARG00000076218	101886595	yes	yes	yes	-0.49566	1	4.93887	-1.18963	0.52678	7.21909	no	no
B3GAT1	ENSDARG00000113928	100332644	yes	yes	yes	-2.73652	0.189281	1.98864	-2.42287	0.129088	5.29095	no	no
B3GNT10	ENSDARG00000094253	101883349	no	yes	yes	0.792723	1	6.56656	0.456312	1	6.54117	no	no
b3gnt2l	ENSDARG00000068219	797513	yes	yes	yes	-0.828012	0.554251	12.0504	-1.50969	0.0151561	83.8805	no	no
b3gnt3.2	ENSDARG00000054373	100002020	no	yes	yes	1.0547	0.603856	13.8346	1.11569	0.589776	13.812	no	no
b3gnt3.3	ENSDARG00000093521	561028	no	yes	yes	-0.413828	0.86779	5.95331	-0.445217	1	5.60972	no	no
b3gnt3.4	ENSDARG00000058100	561172	yes	yes	yes	-0.826819	0.568636	11.6979	-0.893592	0.419851	25.7703	no	no
b4galnt2.1	ENSDARG00000094579	558078	yes	yes	yes	-1.08283	1	3.31654	-0.954889	0.517496	8.26863	no	no
bace1	ENSDARG00000101716	403005	yes	yes	yes	-1.55862	1	2.69913	-1.67442	0.00227422	84.002	no	no
bada	ENSDARG00000087993	564921	yes	yes	yes	1.8866	0.00162244	138.52	1.67947	0.000175111	1180.91	yes	yes
baiap2l2b	ENSDARG00000060933	564798	yes	yes	yes	-0.791226	0.553832	13.17	-0.759616	0.499477	18.4273	no	no
bard1	ENSDARG00000076733	100147913	yes	yes	yes	0.00135053	0.998697	22.0355	-0.459492	0.641169	40.5881	no	no
barx2	ENSDARG00000041098	100002200	yes	yes	yes	0.394918	0.853128	10.4847	-0.390015	0.799193	17.4107	no	no
baz1a	ENSDARG00000099745	334173	yes	yes	yes	-0.228783	0.728558	1205.82	-0.2242	0.728913	1204.61	no	no
baz1b	ENSDARG00000102832	571727	yes	yes	yes	-0.722642	0.195894	345.883	-0.588825	0.225783	1235.29	no	no
bbx	ENSDARG00000012699	100005540	yes	yes	yes	0.0939111	0.903923	370.959	0.138011	0.849254	408.566	no	no
bcar3	ENSDARG00000016981	570610	yes	yes	yes	0.400866	0.65328	72.8591	0.777478	0.106582	430.393	no	no
bcl11ab	ENSDARG00000063153	566491	yes	yes	yes	-0.682843	0.423143	50.9162	0.370389	0.584534	1243.78	no	no
bcl2l11	ENSDARG00000079144	100190951	no	yes	yes	0.518822	0.772158	15.109	1.08733	1	9.46801	no	no
bdkrb1	ENSDARG00000020744	368199	no	yes	yes	-0.617979	1	4.29289	-0.630868	1	4.27492	no	no
best1	ENSDARG00000078331	560608	yes	yes	yes	-1.15643	0.530649	5.01183	-1.21569	0.29334	10.6108	no	no
best2	ENSDARG00000079163	567214	yes	yes	yes	-2.23751	1	1.61495	-1.86804	0.178429	5.62647	no	no
best4	ENSDARG00000078455	563711	yes	yes	yes	-0.735068	1	2.27783	-0.78768	0.602869	14.6989	no	no
bicc1b	ENSDARG00000070497	571411	yes	yes	yes	1.24733	0.0458379	238.681	2.11599	1.01862e-06	3774.3	yes	yes
bicd1a	ENSDARG00000079496	556758	yes	yes	yes	-0.546291	0.781477	9.15571	-0.731101	0.626135	25.269	no	no
BICD2	ENSDARG00000098215	100330881	yes	yes	yes	0.0532162	0.964832	55.5094	0.504967	0.300116	1425.9	no	no
bin1a	ENSDARG00000042114	563561	yes	yes	yes	-2.92537	0.0417471	2.69175	-2.77964	5.27057e-05	21.6983	no	no
bmf1	ENSDARG00000090234	571949	no	yes	yes							no	no
bmp10	ENSDARG00000061769	562533	yes	yes	yes	-1.70959	0.335814	5.50773	-1.18231	0.564571	8.69393	no	no
bmp3	ENSDARG00000060526	777717	yes	yes	yes	1.63966	0.00276295	343.109	2.00241	3.55579e-07	3616.57	yes	yes
bmper	ENSDARG00000101980	338246	yes	yes	yes	1.90405	0.00891762	168.657	2.3044	1.10797e-06	1508.69	yes	yes
bnip3	ENSDARG00000099961	336116	yes	yes	yes	0.178124	1	4.64016	-0.83708	0.675358	9.13654	no	no
bod1l1	ENSDARG00000089505	100332682	yes	yes	yes	-0.037724	0.973031	111.409	-0.0911224	0.924597	148.139	no	no
brinp2	ENSDARG00000014302	561009	yes	yes	yes	-2.13745	0.0074836	23.2039	-2.54606	2.82544e-07	39.5389	no	no
brwd3	ENSDARG00000035540	553209	yes	yes	yes	-1.25112	0.0315529	38.7716	-0.27776	0.630001	626.738	no	no
bspry	ENSDARG00000104875	559377	yes	yes	yes	0.0723722	0.968194	18.8796	-0.360771	0.792313	22.8122	no	no
btbd11b	ENSDARG00000063040	100034519	yes	yes	yes	0.68627	0.568936	31.8452	0.440204	0.620795	72.2588	no	no
btbd17b	ENSDARG00000102472	563672	yes	yes	yes	-0.511705	0.831501	8.45689	-0.833026	0.60447	12.3628	no	no
btbd2b	ENSDARG00000104653	555499	yes	yes	yes	-0.198801	0.897941	21.7241	0.313362	0.797078	37.7993	no	no
btbd3b	ENSDARG00000087517	562593	yes	yes	yes	-1.27848	0.449484	5.99139	-1.78543	0.0944242	10.9449	no	no
btr01	ENSDARG00000051965	563047	yes	yes	yes	-1.11209	0.444782	8.55198	-1.12307	0.458387	8.5152	no	no
btr21	ENSDARG00000058329	101885574	yes	yes	yes	-0.674249	0.737793	7.59361	-1.21995	0.563694	4.9543	no	no
btr23	ENSDARG00000099509	100334710	yes	yes	yes	0.595948	0.771994	12.0028	0.0194506	0.992356	14.985	no	no
btr24	ENSDARG00000105283	100536410	yes	yes	yes	-1.96277	1	0.96897				no	no
btr30	ENSDARG00000102591	393394	yes	yes	yes	-2.50376	0.684434	2.72769	-5.584	1	0	no	no
btr31	ENSDARG00000096304	555877	yes	yes	yes	-0.194278	0.936103	7.53231	0.676695	1	9.20267	no	no
BX000701.1	ENSDARG00000099172	101882267	yes	yes	yes	-0.405055	0.877185	6.24773	0.253388	0.898335	16.7345	no	no
BX005448.1	ENSDARG00000100502	563697	yes	yes	yes	4.36665	1	3.64584	-1.0578	0.368196	14.0877	no	no
BX072576.1	ENSDARG00000078204	101885642	yes	yes	yes	-1.4309	0.428963	5.54998	-1.72196	0.2713	7.1651	no	no
BX088587.1	ENSDARG00000104695	101882633	yes	yes	yes	0.449124	0.762056	27.9022	-0.0477821	0.979484	28.5117	no	no
BX248108.1	ENSDARG00000114306	560089	yes	yes	yes	0.357657	0.845195	13.9662	0.0793715	0.968343	16.31	no	no
BX248122.1	ENSDARG00000112449	103910472	yes	yes	yes	0.388819	0.815371	31.6844	0.468	0.71421	39.7826	no	no
BX284638.1	ENSDARG00000116871	568650	yes	yes	yes	-1.1045	0.00537122	320.221	-0.813957	0.044527	1071.61	no	no
BX322587.1	ENSDARG00000089636	100002141	no	yes	yes	1.72437	1	5.23758	1.9574	1	6.1791	no	no
BX323022.1	ENSDARG00000116593	101882881	yes	yes	yes	-1.3528	0.566159	6.4598	-1.05218	0.701403	6.42712	no	no
BX323882.1	ENSDARG00000101656	563995	yes	yes	yes	2.03142	1	2.64521	1.9455	1	1.33075	no	no
BX324132.4	ENSDARG00000114278	568680	yes	yes	yes	-1.59146	0.409966	4.02489				no	no
BX324188.1	ENSDARG00000075970	101886918	yes	yes	yes	-1.30822	0.515656	5.00659	-1.42531	0.472013	4.99444	no	no
BX470259.1	ENSDARG00000111506	101886309				-1.01296	1	4.22422				no	no
BX510342.1	ENSDARG00000099759	100001444	yes	yes	yes							no	no
BX510922.3	ENSDARG00000113380	108180795	yes	yes	yes	-0.487097	1	5.21009	-0.180485	0.94673	12.3414	no	no
BX511013.1	ENSDARG00000112403	103908633	yes	yes	yes	-1.40672	0.431241	5.32958	-0.480621	0.782592	22.6015	no	no
BX511021.1	ENSDARG00000073936	100006428	yes	yes	yes	-3.8941	0.016272	24.0704	-4.24453	1.97797e-10	23.4457	no	no
BX530018.1	ENSDARG00000037576	567498	yes	yes	yes	-0.200208	0.934851	8.01074	-0.346479	0.868161	11.2489	no	no
BX537137.1	ENSDARG00000092436	100148466	yes	yes	yes	0.829137	1	4.4325	0.67836	0.322619	111.321	no	no
BX539310.1	ENSDARG00000116510	110439423	yes	yes	yes	7.835	0.261212	40.3573	-0.404087	0.551087	267.822	no	no
BX539336.1	ENSDARG00000100606	100331456	yes	yes	yes	0.264277	0.8771	16.9756	1.69389	1.21308e-05	1628.48	no	yes
BX569798.1	ENSDARG00000037619	797518	yes	yes	yes	-0.318548	0.901132	6.88003	-1.52567	0.392556	5.65448	no	no
BX601644.1	ENSDARG00000090632	100294510	yes	yes	yes				0.0724986	1	4.29022	no	no
BX649490.4	ENSDARG00000111856	101886973	yes	yes	yes	-0.475273	0.786658	13.8785	-0.441809	0.812296	11.8656	no	no
BX649556.2	ENSDARG00000115416	101883274	yes	yes	yes	-1.72397	0.263838	6.4021	-0.984953	0.711753	7.76133	no	no
BX649608.2	ENSDARG00000115608	101883865	yes	yes	yes	-3.55697	1	0.32299	-1.13558	0.466698	11.447	no	no
BX769173.3	ENSDARG00000114992	567166	yes	yes	yes	-1.11899	1	3.95193	-0.955492	1	4.93495	no	no
BX855614.1	ENSDARG00000094551	555910	yes	yes	yes	-0.218802	0.913713	25.7623	-0.283136	0.887138	26.283	no	no
BX901889.1	ENSDARG00000077036	100331689	no	yes	no							no	no
BX901922.1	ENSDARG00000057886	108191960	yes	yes	yes				-0.580282	1	2.31012	no	no
BX908782.1	ENSDARG00000100184	103910141	yes	yes	yes	-4.6361	1	0	-1.68821	0.202091	11.4282	no	no
BX908782.3	ENSDARG00000116628	100329375	yes	yes	yes	-1.87293	0.733379	28.4231	-1.64046	0.533767	129.52	no	no
BX927362.2	ENSDARG00000112918	101882029	no	yes	yes	-1.0702	0.155223	45.5859	-0.731494	0.481485	36.0331	no	no
BX957322.1	ENSDARG00000089562	100006797	yes	yes	yes	0.0135753	0.99495	14.6032	-0.610276	0.766115	15.5224	no	no
C14orf28	ENSDARG00000102021	100333462	yes	yes	yes	-4.95618	1	0	-1.69492	0.378324	4.21227	no	no
C1orf232	ENSDARG00000103312	101883133	yes	yes	yes	-0.748461	1	1.29196	-1.78544	1	2.96958	no	no
c1ql2	ENSDARG00000015592	100005110	yes	yes	yes	-2.18047	0.236856	4.19887	-2.23261	0.216537	5.1417	no	no
c1ql3a	ENSDARG00000010350	100151368	yes	yes	yes	0.410871	0.776122	26.4627	0.397831	0.725715	45.7165	no	no
c1ql3b	ENSDARG00000028521	556064	yes	yes	yes				-0.565101	0.751743	11.5896	no	no
c1ql4a	ENSDARG00000011549	559288	yes	yes	yes	-1.53631	0.269983	6.2319	-1.39271	0.0965794	40.2275	no	no
c2cd2	ENSDARG00000105000	100332559	yes	yes	yes	-0.581996	0.648019	21.7432	0.115118	0.8858	465.536	no	no
c3a.4	ENSDARG00000093198	100331428	yes	yes	yes	-0.163252	0.939625	12.43	-0.465817	0.792495	13.3656	no	no
C3AR1	ENSDARG00000031749	794255	yes	yes	yes	-0.0870882	0.970141	9.87989	-0.285921	0.892989	10.18	no	no
c5	ENSDARG00000021004	565774	yes	yes	yes	-0.985813	0.433775	13.094	-1.08221	0.388892	13.0376	no	no
ca2	ENSDARG00000014488	387526	yes	yes	yes	-1.03246	0.271317	30.2687	-1.02377	0.0898932	331.705	no	no
cabin1	ENSDARG00000079326	571383	yes	yes	yes	-0.190776	0.830551	103.651	0.110342	0.887407	228.45	no	no
cabp7b	ENSDARG00000060846	556082	yes	yes	yes	-4.08981	0.016048	0.96897	-3.88393	3.76281e-06	14.0143	no	no
CABZ01003344.1	ENSDARG00000102600	108182686	yes	yes	yes	-2.20071	1	1.36385	-2.08521	1	2.38491	no	no
CABZ01003476.1	ENSDARG00000103345	110438068	yes	yes	yes				-0.882997	0.753126	5.92298	no	no
CABZ01013771.1	ENSDARG00000101415	110438486	yes	yes	yes	-1.78048	1	2.26093	-2.45654	1	1.65413	no	no
CABZ01018874.1	ENSDARG00000105677	100535375	no	yes	yes	-0.509736	1	1.99816	0.818996	1	1.66077	no	no
CABZ01021532.1	ENSDARG00000115887	108179086	yes	yes	yes							no	no
CABZ01021599.1	ENSDARG00000112870	110437957	yes	yes	yes	0.475587	0.761022	18.6656	0.550656	0.569636	70.3665	no	no
CABZ01022564.1	ENSDARG00000115384	108179082	yes	yes	yes							no	no
CABZ01024856.1	ENSDARG00000104013	100537431	yes	yes	yes							no	no
CABZ01029822.1	ENSDARG00000086931	100004582	yes	yes	yes	0.806888	0.196368	212.686	0.823968	0.0735682	2262	no	no
CABZ01034596.1	ENSDARG00000117160	100537502	yes	yes	yes							no	no
CABZ01035279.1	ENSDARG00000116774	110437793	yes	yes	yes				-0.194271	0.816671	184.863	no	no
CABZ01035356.1	ENSDARG00000114210	110438478	no	yes	yes	1.88901	0.204714	43.0423	2.01206	0.193227	36.9163	no	no
CABZ01037298.1	ENSDARG00000102015	100537556	yes	yes	yes	-0.757262	0.639723	11.3019	-0.498799	0.498581	109.779	no	no
CABZ01038494.1	ENSDARG00000088258	100535551	yes	yes	yes	1.16707	0.654519	9.21272	0.736751	0.110689	587.165	no	no
CABZ01039782.1	ENSDARG00000093286	566743	yes	yes	yes	-2.07386	0.0738185	6.88633	-1.41254	0.0652337	23.0744	no	no
CABZ01041494.1	ENSDARG00000040319	100000959	yes	yes	yes	-1.36326	1	3.57824	-2.04078	0.151073	5.541	no	no
CABZ01041495.1	ENSDARG00000105882	100000094	yes	yes	yes	-2.32469	0.285096	2.34127	-2.17232	0.00293436	61.8158	no	no
CABZ01041604.1	ENSDARG00000059854	797048	yes	yes	yes	-0.384824	0.876792	5.61556	-1.02049	0.388375	15.1698	no	no
CABZ01043952.1	ENSDARG00000110954	562793	yes	yes	yes	0.719773	0.66655	19.7017	1.38535	0.012468	194.551	no	yes
CABZ01043955.1	ENSDARG00000087867	101882338	yes	yes	yes	-1.16855	1	3.93503	-2.47544	0.000619387	12.8409	no	no
CABZ01044048.1	ENSDARG00000011463	100004411	yes	yes	yes	-4.22003	1	0.340961	-4.48351	1	0.330017	no	no
CABZ01044053.1	ENSDARG00000087950	100329390	yes	yes	yes	0.357852	0.652807	336.517	0.24127	0.658804	966.905	no	no
CABZ01045212.1	ENSDARG00000087525	564731	yes	yes	yes	-1.1798	0.569589	4.32991	0.0555676	0.979791	16.5139	no	no
CABZ01050105.2	ENSDARG00000111916	103910016	no	yes	yes	1.01046	0.49814	43.5559	0.336131	0.876988	24.9468	no	no
CABZ01050249.1	ENSDARG00000099376	100333521	yes	yes	yes	0.988981	0.544066	13.3085	0.771448	0.638225	15.8385	no	no
CABZ01050398.1	ENSDARG00000102655	100536144	yes	yes	yes							no	no
CABZ01050944.1	ENSDARG00000105972	100535636	yes	yes	yes	-2.08688	0.129892	4.26016	-0.685749	0.495481	27.6799	no	no
CABZ01051600.2	ENSDARG00000110394	100148750	yes	yes	yes							no	no
CABZ01053221.1	ENSDARG00000058774	101883597	yes	yes	yes	-0.433558	0.855301	8.25327	-0.637621	0.775983	8.2178	no	no
CABZ01054394.1	ENSDARG00000090942	101885996	yes	yes	yes	-0.444153	0.826647	12.2973	-0.427473	0.71585	29.4388	no	no
CABZ01055347.1	ENSDARG00000061660	100333227	yes	yes	no	-0.475166	0.718362	25.7808	-0.811946	0.268353	52.6717	no	no
CABZ01057928.1	ENSDARG00000115082	101882228	no	yes	yes	-0.94589	1	3.32499	0.215849	0.927733	11.1268	no	no
CABZ01058046.1	ENSDARG00000113768	101885783	yes	yes	yes	-1.52163	0.328793	5.22806	-2.46827	0.172566	2.59019	no	no
CABZ01058261.1	ENSDARG00000099194	572121	yes	yes	no	-0.48613	0.417191	416.159	-0.565116	0.306867	474.51	no	no
CABZ01059099.1	ENSDARG00000067927	101882949	yes	yes	yes				-0.865879	0.623743	10.7188	no	no
CABZ01059627.2	ENSDARG00000079681	100332822	yes	yes	yes	0.0697142	0.980871	10.7178	-0.917899	0.634794	11.3081	no	no
CABZ01059912.1	ENSDARG00000101453	108182725	no	yes	yes							no	no
CABZ01060030.1	ENSDARG00000106579	100331257	yes	yes	yes	2.28389	0.00110752	68.9437	1.66654	0.00265631	203.854	yes	yes
CABZ01060891.1	ENSDARG00000067815	100151059	yes	yes	yes	-1.55587	0.269731	10.7601	-1.56382	0.184102	12.0501	no	no
CABZ01061894.1	ENSDARG00000116712	100006548	yes	yes	yes	0.862158	0.0576049	499.695	0.960084	0.00749545	2062.84	no	no
CABZ01063543.1	ENSDARG00000113045	100537771	no	yes	yes	-1.03221	1	3.9023	-1.77938	0.245915	5.50838	no	no
CABZ01064472.1	ENSDARG00000067801	100333323	no	yes	no	-0.876667	0.494931	11.2892	-1.28934	0.352595	7.22718	no	no
CABZ01065328.1	ENSDARG00000090310	100329398	no	yes	yes							no	no
CABZ01066719.1	ENSDARG00000099731	100536030	yes	yes	yes	1.88339	0.165785	18.8341	0.933707	0.546332	21.4	no	no
CABZ01066725.1	ENSDARG00000100700	100329948	yes	yes	no	0.845781	0.666103	11.4441	0.875816	0.427999	41.1335	no	no
CABZ01066926.1	ENSDARG00000099534	100329344	yes	yes	yes	0.0444757	0.988448	15.2385	0.347154	0.579219	324.345	no	no
CABZ01067175.1	ENSDARG00000100401	100008066	yes	yes	yes	-0.692272	0.792503	5.26186	-0.951907	0.620462	6.8911	no	no
CABZ01067232.1	ENSDARG00000057408	101886389	yes	yes	yes	-2.72559	0.0486198	3.93503	-3.25328	0.00139068	12.3847	no	no
CABZ01067557.1	ENSDARG00000114697	100536316	yes	yes	yes				-0.979314	0.572997	8.86861	no	no
CABZ01067558.1	ENSDARG00000099598	110437809	yes	yes	yes	0.30469	1	5.82227	-2.38581	0.188644	2.6615	no	no
CABZ01067973.1	ENSDARG00000090398	100536162	yes	yes	yes	-5.26355	0.00637011	0.340961	-0.987844	0.5121	11.7288	no	no
CABZ01068356.1	ENSDARG00000076702	101886286	yes	yes	yes	-1.51472	1	1.98864	-1.13689	0.29356	14.1116	no	no
CABZ01068469.1	ENSDARG00000111388	569006	no	yes	yes	-2.9331	1	0.672402	-1.55544	1	1.95614	no	no
CABZ01068499.1	ENSDARG00000103034	100536500	yes	yes	yes	-2.14283	0.00211323	41.8832	-2.30916	0.00041721	65.9937	no	no
CABZ01070469.1	ENSDARG00000113254	100002384	yes	yes	yes	-0.533146	0.776804	7.92719	-0.787576	0.582328	11.5321	no	no
CABZ01071061.1	ENSDARG00000114841	100329789	yes	yes	yes	-0.465374	1	2.27783	-1.82394	0.00378848	22.4877	no	no
CABZ01072083.2	ENSDARG00000114742	570815	yes	yes	yes	-0.0936981	0.943492	93.9649	0.00573753	0.996971	139.068	no	no
CABZ01072254.1	ENSDARG00000076111	100333154	no	yes	yes	0.425856	0.819578	15.3813	0.235537	0.914561	12.4102	no	no
CABZ01072312.1	ENSDARG00000104926	100333524	yes	yes	yes							no	no
CABZ01072885.1	ENSDARG00000104259	101885743	yes	yes	yes	-0.52092	1	1.36385	-0.434919	0.766815	23.5912	no	no
CABZ01072989.1	ENSDARG00000091638	100535282	yes	yes	yes	-4.22966	1	0	-4.75416	1	0.330017	no	no
CABZ01073265.1	ENSDARG00000099425	557557	yes	yes	no	4.21292	1.0557e-09	3555.05	4.03742	9.74581e-10	4553.99	yes	yes
CABZ01074203.1	ENSDARG00000103892	100332902	yes	yes	yes	-0.602771	0.803966	6.49467	-0.751854	0.552918	16.1746	no	no
CABZ01074745.1	ENSDARG00000102748	110438480	yes	yes	yes	-1.64123	0.0100545	165.569	-1.16	0.0184893	276.281	no	no
[truncated: 2,509 more rows]

## Sheet: 5 Nr2f2Pos
Ens95 Gene Symbol	Ensdarg	NCBI ID	RefSeq 3'UTR	RefSeq CDS	RefSeq Stop	Ens95 Nr2f2Pos Avg	Ens95 Nr2f2Pos Lg2Fc	Ens95 Nr2f2pos Padj	RefSeq Nr2f2Pos Avg	RefSeq Nr2f2Pos Lg2Fc	RefSeq Nr2f2Pos Padj	Ens95 enriched	RefSeq enriched
[truncated: 2,826 more rows]
