# Supplementary material for: An improved zebrafish transcriptome annotation for sensitive and comprehensive detection of cell type-specific genes
Source: eLife. 2020 Aug 24;9:e55792. doi: 10.7554/eLife.55792 (PMC7486121; doi:10.7554/eLife.55792)
Supplement: Figure 2—source data 2. — IDs for representative Ens95, RefSeq, and V4.3 transcript ID, along with V4.3 gene symbols are shown with respective 3' UTR lengths (worksheet 1). Average median ratio normalized expression and log2 fold change (pos/neg) values quantified with Ens95, RefSeq, and V4.3 annotations from kdrlpos (worksheet 2), pdgfrbpos (worksheet 3), and Nr2f2pos (worksheet 4) RNA-seq for reference genes are included. Data directly used to generate Figure 2D–G, Figure 2—figure supplement 2C–H, Figure 3B–J and incorporated into source data as indicated below. [file elife-55792-fig2-data2.xlsx]

## Sheet: title
	Figure 2 - source data 2
	Reference gene set for 3' UTR comparisons
	worksheet 1 - list of matched transcripts with corresponding IDs from each annotation; 3' UTR lengths for each are shown
	worksheet 2 - kdrlPos expression quantified by RNA-seq for each reference gene; relative 3' UTR length is indicated
	worksheet 3 - pdgfrbPos expression quantified by RNA-seq for each reference gene; relative 3' UTR length is indicated
	worksheet 4 - Nr2f2Pos expression quantified by RNA-seq for each reference gene; relative 3' UTR length is indicated

## Sheet: 1 RefGenes 3' UTR len
V4_3Abbrev	EnsdartID	Ens95 3pUTR length	RefSeqID	RefSeq 3pUTR length	V4tconsID	V4 3pUTR length	Ens95 vs. RefSeq	Ens95/RefSeq difference (+ Ens longer)	V4 vs. Ens95-RefSeq	V4 difference (+ V4 longer)
shda	ENSDART00000146418	467	NM_001110835.1	467	TCONS_00051989	13516	same	0	V4 longer	13049
ube2d4	ENSDART00000098439	1063	NM_001089453.1	1053	TCONS_00119494	14054	same	10	V4 longer	12991
znf704	ENSDART00000088358	229	NM_001044918.2	119	TCONS_00048865	13210	Ens95 longer	110	V4 longer	12981
slx1b	ENSDART00000163745	277	NM_001327857.1	277	TCONS_00116529	11809	same	0	V4 longer	11532			Same	9077
kcnk10b	ENSDART00000067542	5	XM_005169783.4	360	TCONS_00036738	11747	RefSeq longer	-355	V4 longer	11387			RefSeq longer	2558
abhd17aa	ENSDART00000129704	343	NM_001089323.1	343	TCONS_00051842	11405	same	0	V4 longer	11062			Ens95 longer	4923
zgc:194281	ENSDART00000110735	40	NM_001128757.1	40	TCONS_00008236	11008	same	0	V4 longer	10968
rnf44	ENSDART00000163865	3660	XM_005168220.4	1974	TCONS_00024712	14493	Ens95 longer	1686	V4 longer	10833
nacc1b	ENSDART00000170700	1670	XM_001922112.7	5031	TCONS_00013783	15636	RefSeq longer	-3361	V4 longer	10605
hmbox1a	ENSDART00000030835	315	XM_005169831.4	899	TCONS_00039582	11271	RefSeq longer	-584	V4 longer	10372			For Ens95/RefSeq with same length 3' UTR
ZNF512B	ENSDART00000151947	530	XM_005162004.4	618	TCONS_00070245	10933	RefSeq longer	-88	V4 longer	10315			same in V4	7497
ubtd1b	ENSDART00000083784	610	NM_001030265.1	398	TCONS_00016555	10863	Ens95 longer	212	V4 longer	10253			longer in V4	1576
large1	ENSDART00000193576	218	XM_005168584.4	468	TCONS_00098190	10216	RefSeq longer	-250	V4 longer	9748			shorter in V4	4
mapk10	ENSDART00000161753	473	NM_001037701.2	477	TCONS_00060796	10192	same	-4	V4 longer	9715
sfxn1	ENSDART00000023654	688	XM_005169627.4	847	TCONS_00026833	10426	RefSeq longer	-159	V4 longer	9579
rgs19	ENSDART00000111368	24	XM_021469715.1	655	TCONS_00070089	10230	RefSeq longer	-631	V4 longer	9575			For Ens95 longer 3' UTR
cdk16	ENSDART00000137382	676	XM_001335539.7	733	TCONS_00120071	9976	RefSeq longer	-57	V4 longer	9243			same in V4	4168
cacnb3a	ENSDART00000087280	631	XM_005161994.4	931	TCONS_00070264	10026	RefSeq longer	-300	V4 longer	9095			longer in V4	688
GFOD1	ENSDART00000087441	2	XM_009297668.3	1168	TCONS_00077515	10256	RefSeq longer	-1166	V4 longer	9088			shorter in V4	67
ghra	ENSDART00000018886	312	NM_001083578.1	312	TCONS_00121322	9328	same	0	V4 longer	9016
susd5	ENSDART00000123360	139	XM_005159753.4	198	TCONS_00049238	9128	RefSeq longer	-59	V4 longer	8930
ankrd52a	ENSDART00000032861	25	NM_001018154.1	25	TCONS_00073589	8944	same	0	V4 longer	8919			For RefSeq longer 3' UTR
LOC100333482	ENSDART00000166470	197	XM_002667721.6	344	TCONS_00036479	9240	RefSeq longer	-147	V4 longer	8896			same in V4	1223
ankk1	ENSDART00000079504	226	NM_001130665.1	226	TCONS_00027808	9109	same	0	V4 longer	8883			longer in V4	865
kcnab2a	ENSDART00000127292	246	XM_009306289.3	1241	TCONS_00011981	10113	RefSeq longer	-995	V4 longer	8872			shorter in V4	470
elk4	ENSDART00000102850	1234	NM_130930.3	309	TCONS_00014060	10096	Ens95 longer	925	V4 longer	8862
grb10b	ENSDART00000137365	3642	XM_005157874.3	3126	TCONS_00034149	12468	Ens95 longer	516	V4 longer	8826
tmem86a	ENSDART00000064646	585	NM_001013512.2	580	TCONS_00078780	9236	same	5	V4 longer	8651
ERBB4_1_of_many	ENSDART00000127426	711	XM_021475936.1	3819	TCONS_00000303	12424	RefSeq longer	-3108	V4 longer	8605
chico	ENSDART00000002241	367	NM_001312685.1	367	TCONS_00054995	8838	same	0	V4 longer	8471
slc41a1	ENSDART00000102870	1084	XM_002663821.6	2372	TCONS_00014046	10776	RefSeq longer	-1288	V4 longer	8404
slc5a6a	ENSDART00000134819	316	NM_001025529.2	316	TCONS_00059459	8690	same	0	V4 longer	8374
sc:d0202	ENSDART00000142710	27	XM_001921980.7	339	TCONS_00083758	8601	RefSeq longer	-312	V4 longer	8262
gna11b	ENSDART00000044411	794	NM_001007773.1	828	TCONS_00054998	8907	same	-34	V4 longer	8079
ches1	ENSDART00000137601	592	XM_005160419.4	21	TCONS_00058439	8627	Ens95 longer	571	V4 longer	8035
klf12b	ENSDART00000146115	627	NM_001109865.1	627	TCONS_00123776	8624	same	0	V4 longer	7997
ankib1a	ENSDART00000133628	662	XM_005159781.4	575	TCONS_00046904	8630	Ens95 longer	87	V4 longer	7968
si:dkeyp-77h1.4	ENSDART00000081092	1161	XM_009292118.3	1004	TCONS_00031892	8973	Ens95 longer	157	V4 longer	7812
creb5b	ENSDART00000103630	1352	XM_021466897.1	568	TCONS_00034693	9110	Ens95 longer	784	V4 longer	7758
wdr20b	ENSDART00000143172	621	XM_003200785.5	787	TCONS_00057627	8503	RefSeq longer	-166	V4 longer	7716
fam131bb	ENSDART00000103750	1320	XM_001919486.6	1362	TCONS_00032228	9012	same	-42	V4 longer	7650
cyp2ae1	ENSDART00000035654	366	XM_009297119.3	509	TCONS_00071691	8114	RefSeq longer	-143	V4 longer	7605
ormdl3	ENSDART00000038310	699	NM_001006087.1	699	TCONS_00017398	8280	same	0	V4 longer	7581
plpp6	ENSDART00000063882	606	NM_001328338.1	606	TCONS_00058397	8180	same	0	V4 longer	7574
mecp2	ENSDART00000040672	98	NM_001328555.1	87	TCONS_00120056	7630	same	11	V4 longer	7532
si:ch211-153j24.3	ENSDART00000122115	51	XM_687741.9	230	TCONS_00057334	7731	RefSeq longer	-179	V4 longer	7501
six4a	ENSDART00000143903	1143	NM_131718.2	149	TCONS_00022080	8606	Ens95 longer	994	V4 longer	7463
reep1	ENSDART00000149041	827	XM_001340171.6	499	TCONS_00038288	8282	Ens95 longer	328	V4 longer	7455
stat5a	ENSDART00000139763	201	NM_194387.2	191	TCONS_00081905	7651	same	10	V4 longer	7450
scn4ba	ENSDART00000159627	867	NM_001077570.1	867	TCONS_00029563	8317	same	0	V4 longer	7450
pcyox1	ENSDART00000159330	119	NM_001017626.1	122	TCONS_00008304	7557	same	-3	V4 longer	7435
snx13	ENSDART00000063615	621	XM_021468237.1	632	TCONS_00047188	8050	same	-11	V4 longer	7418
tyro3	ENSDART00000140391	690	NM_131432.2	690	TCONS_00036989	8067	same	0	V4 longer	7377
ano8b	ENSDART00000108628	524	XM_021479701.1	37	TCONS_00012587	7881	Ens95 longer	487	V4 longer	7357
pter	ENSDART00000144699	206	NM_001045381.2	83	TCONS_00052380	7548	Ens95 longer	123	V4 longer	7342
si:dkey-222b8.1	ENSDART00000139040	27	XM_005170048.4	515	TCONS_00046080	7855	RefSeq longer	-488	V4 longer	7340
f9b	ENSDART00000100329	215	NM_001040310.1	215	TCONS_00006910	7544	same	0	V4 longer	7329
slc18a2	ENSDART00000025466	75	NM_001256225.2	55	TCONS_00037492	7402	same	20	V4 longer	7327
zdhhc14	ENSDART00000145540	204	XM_005160351.4	1100	TCONS_00057958	8367	RefSeq longer	-896	V4 longer	7267
agps	ENSDART00000143130	85	NM_200113.1	85	TCONS_00124893	7350	same	0	V4 longer	7265
cpne7	ENSDART00000159989	758	XM_017357127.2	10	TCONS_00113669	7998	Ens95 longer	748	V4 longer	7240
wasf3b	ENSDART00000091529	879	NM_001080590.1	879	TCONS_00074962	8107	same	0	V4 longer	7228
cavin1a	ENSDART00000112450	463	XM_001920667.5	370	TCONS_00081895	7668	Ens95 longer	93	V4 longer	7205
ppm1e	ENSDART00000063551	70	NM_001020518.1	70	TCONS_00007177	7224	same	0	V4 longer	7154
pbx1b	ENSDART00000165223	615	XM_021476921.1	713	TCONS_00105324	7837	RefSeq longer	-98	V4 longer	7124
spred2b	ENSDART00000045292	1419	NM_213234.1	1419	TCONS_00020999	8543	same	0	V4 longer	7124
kremen1	ENSDART00000090684	842	XM_009301224.3	965	TCONS_00102310	8054	RefSeq longer	-123	V4 longer	7089
fam78ab	ENSDART00000124587	625	NM_001114475.1	628	TCONS_00105147	7694	same	-3	V4 longer	7066
prkar1ab	ENSDART00000165225	563	NM_001017732.1	563	TCONS_00014536	7621	same	0	V4 longer	7058
apbb1	ENSDART00000136709	240	XM_003199317.5	632	TCONS_00006377	7684	RefSeq longer	-392	V4 longer	7052
tfe3a	ENSDART00000171325	206	XM_005166705.4	1564	TCONS_00117310	8600	RefSeq longer	-1358	V4 longer	7036
sema3bl	ENSDART00000046863	705	NM_001122712.1	705	TCONS_00118376	7738	same	0	V4 longer	7033
kank2	ENSDART00000154031	696	NM_001305620.1	696	TCONS_00087196	7711	same	0	V4 longer	7015
slc25a37	ENSDART00000099863	1555	NM_001039971.1	3957	TCONS_00119447	10955	RefSeq longer	-2402	V4 longer	6998
scamp5a	ENSDART00000028338	469	NM_205547.1	469	TCONS_00080844	7460	same	0	V4 longer	6991
si:ch211-71n6.4	ENSDART00000160506	304	XM_009293838.3	656	TCONS_00044687	7608	RefSeq longer	-352	V4 longer	6952
znf507	ENSDART00000098942	642	XM_005166460.4	1046	TCONS_00112968	7984	RefSeq longer	-404	V4 longer	6938
cabp1b	ENSDART00000122682	595	NM_001002414.1	595	TCONS_00009794	7531	same	0	V4 longer	6936
tmem150ab	ENSDART00000050969	529	NM_200511.1	529	TCONS_00101009	7456	same	0	V4 longer	6927
slc8a3	ENSDART00000100204	206	XM_005156997.4	2361	TCONS_00022339	9278	RefSeq longer	-2155	V4 longer	6917
adora2b	ENSDART00000144469	10	XM_005168628.4	1387	TCONS_00104605	8277	RefSeq longer	-1377	V4 longer	6890
scn4bb	ENSDART00000084868	631	NM_001077573.1	245	TCONS_00103589	7500	Ens95 longer	386	V4 longer	6869
FAR2	ENSDART00000150490	1029	XM_005164445.4	228	TCONS_00092944	7868	Ens95 longer	801	V4 longer	6839
aspa	ENSDART00000148381	158	NM_001110103.1	150	TCONS_00101280	6941	same	8	V4 longer	6783
lipeb	ENSDART00000157787	83	XM_009292346.2	83	TCONS_00035068	6849	same	0	V4 longer	6766
rem2	ENSDART00000109219	350	NM_001123046.1	350	TCONS_00051453	7107	same	0	V4 longer	6757
bcap29	ENSDART00000007638	662	NM_001024220.1	643	TCONS_00087682	7373	same	19	V4 longer	6711
ek1	ENSDART00000105774	1454	NM_131095.1	1454	TCONS_00075194	8144	same	0	V4 longer	6690
etnk2	ENSDART00000102868	288	NM_001034175.1	288	TCONS_00014043	6972	same	0	V4 longer	6684
rims4	ENSDART00000082821	960	XM_694455.8	990	TCONS_00110187	7669	same	-30	V4 longer	6679
slc6a17	ENSDART00000099607	1648	NM_001256724.2	184	TCONS_00118217	8321	Ens95 longer	1464	V4 longer	6673
tmod2	ENSDART00000012164	296	NM_001004608.1	291	TCONS_00042784	6959	same	5	V4 longer	6663
rab5ab	ENSDART00000015694	507	NM_200970.1	507	TCONS_00033643	7170	same	0	V4 longer	6663
ptgir	ENSDART00000156306	392	XM_021466316.1	690	TCONS_00027265	7344	RefSeq longer	-298	V4 longer	6654
trhra	ENSDART00000131866	55	XM_682154.7	1138	TCONS_00033253	7789	RefSeq longer	-1083	V4 longer	6651
gldn	ENSDART00000149859	196	XM_021467697.1	482	TCONS_00042792	7127	RefSeq longer	-286	V4 longer	6645
pi15a	ENSDART00000141620	212	NM_001159977.1	212	TCONS_00074715	6856	same	0	V4 longer	6644
sgcd	ENSDART00000172245	975	NM_001001816.3	975	TCONS_00064646	7616	same	0	V4 longer	6641
dlgap3	ENSDART00000103151	666	XM_005159679.4	383	TCONS_00046489	7228	Ens95 longer	283	V4 longer	6562
bcl2a	ENSDART00000145290	385	NM_001030253.2	385	TCONS_00076996	6939	same	0	V4 longer	6554
cpeb2	ENSDART00000085290	79	XM_002666399.6	279	TCONS_00069777	6783	RefSeq longer	-200	V4 longer	6504
tbcelb	ENSDART00000131274	184	XM_002662169.6	1831	TCONS_00104635	8314	RefSeq longer	-1647	V4 longer	6483
dtnbb	ENSDART00000145669	497	XM_017351659.2	1021	TCONS_00040503	7463	RefSeq longer	-524	V4 longer	6442
kcnk1b	ENSDART00000017202	585	NM_001290348.1	149	TCONS_00020302	7021	Ens95 longer	436	V4 longer	6436
si:dkey-175m17.7	ENSDART00000139058	198	XM_001345762.6	1035	TCONS_00061860	7447	RefSeq longer	-837	V4 longer	6412
elovl5	ENSDART00000006990	1194	NM_200453.2	1187	TCONS_00018663	7586	same	7	V4 longer	6392
supt7l	ENSDART00000010362	46	NM_001013292.2	30	TCONS_00040584	6434	same	16	V4 longer	6388
ttbk2a	ENSDART00000016815	468	XM_002665239.6	763	TCONS_00040765	7124	RefSeq longer	-295	V4 longer	6361
tgfbr3	ENSDART00000167482	110	NM_001311172.1	69	TCONS_00106235	6458	same	41	V4 longer	6348
dnajb1a	ENSDART00000166146	298	NM_001003571.1	298	TCONS_00086995	6634	same	0	V4 longer	6336
bend5	ENSDART00000133114	1188	NM_001327767.1	887	TCONS_00120420	7503	Ens95 longer	301	V4 longer	6315
vgll2a	ENSDART00000061049	138	NM_001025486.1	138	TCONS_00059691	6415	same	0	V4 longer	6277
slc8a4a	ENSDART00000135052	1120	XM_005161357.4	1120	TCONS_00064084	7390	same	0	V4 longer	6270
myo5aa	ENSDART00000148541	20	XM_005173675.4	1617	TCONS_00042758	7883	RefSeq longer	-1597	V4 longer	6266
zmat3	ENSDART00000109833	178	XM_005155855.4	261	TCONS_00011691	6504	RefSeq longer	-83	V4 longer	6243
fbxl16	ENSDART00000151670	582	NM_001201336.1	568	TCONS_00085680	6749	same	14	V4 longer	6167
mmp24	ENSDART00000047399	2084	XM_694711.7	1112	TCONS_00110199	8248	Ens95 longer	972	V4 longer	6164
mal2	ENSDART00000113724	420	NM_001135977.2	420	TCONS_00034194	6520	same	0	V4 longer	6100
zbtb43	ENSDART00000067600	301	NM_001110024.1	303	TCONS_00101846	6360	same	-2	V4 longer	6057
nkain4	ENSDART00000090930	370	XM_005161981.4	1805	TCONS_00072480	7854	RefSeq longer	-1435	V4 longer	6049
bahcc1a	ENSDART00000162930	198	XM_009299826.3	1559	TCONS_00083821	7572	RefSeq longer	-1361	V4 longer	6013
chmp2ba	ENSDART00000055866	12	NM_001123297.1	12	TCONS_00123096	6011	same	0	V4 longer	5999
map2k4a	ENSDART00000093037	114	XM_005164355.4	114	TCONS_00084821	6113	same	0	V4 longer	5999
tspan9b	ENSDART00000067190	910	NM_001002186.1	910	TCONS_00093437	6883	same	0	V4 longer	5973
pdxp	ENSDART00000183727	43	NM_001128705.1	43	TCONS_00008052	5987	same	0	V4 longer	5944
enpp4	ENSDART00000004043	366	NM_001017887.1	366	TCONS_00038975	6280	same	0	V4 longer	5914
slc25a44a	ENSDART00000148995	145	NM_001007350.1	145	TCONS_00077963	6033	same	0	V4 longer	5888
pcbp3	ENSDART00000185311	1899	NM_001328142.1	1899	TCONS_00124384	7766	same	0	V4 longer	5867
chst14	ENSDART00000063152	475	NM_212829.1	475	TCONS_00058844	6320	same	0	V4 longer	5845
pip4k2ab	ENSDART00000139633	1011	XM_678580.8	1369	TCONS_00050344	7162	RefSeq longer	-358	V4 longer	5793
rffl	ENSDART00000008170	379	XM_005157394.4	1588	TCONS_00029273	7379	RefSeq longer	-1209	V4 longer	5791
napbb	ENSDART00000124582	383	XM_021468497.1	1060	TCONS_00059844	6809	RefSeq longer	-677	V4 longer	5749
fhdc4	ENSDART00000154457	221	XM_689466.5	294	TCONS_00028334	6035	RefSeq longer	-73	V4 longer	5741
uhmk1	ENSDART00000082940	530	NM_001076659.1	530	TCONS_00106695	6252	same	0	V4 longer	5722
dhrs11a	ENSDART00000140537	674	NM_001100048.1	674	TCONS_00098726	6386	same	0	V4 longer	5712
hmga2	ENSDART00000080536	630	NM_212680.1	624	TCONS_00093669	6340	same	6	V4 longer	5710
zgc:65851	ENSDART00000018351	423	NM_199534.1	423	TCONS_00102217	6116	same	0	V4 longer	5693
pid1	ENSDART00000167520	1073	NM_001013504.1	1073	TCONS_00044758	6759	same	0	V4 longer	5686
btbd7	ENSDART00000020710	192	XM_005160586.3	1140	TCONS_00058950	6788	RefSeq longer	-948	V4 longer	5648
casd1	ENSDART00000049842	239	NM_001278180.1	239	TCONS_00046615	5883	same	0	V4 longer	5644
plekha1b	ENSDART00000138954	98	XM_003199578.5	635	TCONS_00017020	6275	RefSeq longer	-537	V4 longer	5640
st8sia2	ENSDART00000013082	566	NM_153662.1	564	TCONS_00044202	6205	same	2	V4 longer	5639
ifngr1l	ENSDART00000114907	220	NM_001171592.1	220	TCONS_00018622	5853	same	0	V4 longer	5633
avpr2ab	ENSDART00000148769	1	XM_001922007.6	556	TCONS_00070455	6188	RefSeq longer	-555	V4 longer	5632
mylkb	ENSDART00000027684	339	XM_009302263.3	308	TCONS_00108440	5967	same	31	V4 longer	5628
itgb3a	ENSDART00000025358	117	NM_001037235.1	121	TCONS_00082069	5737	same	-4	V4 longer	5616
si:ch211-207i20.2	ENSDART00000160622	82	NM_001327904.1	85	TCONS_00016925	5673	same	-3	V4 longer	5588
gsdmea	ENSDART00000151673	252	XM_005170077.3	296	TCONS_00045945	5878	same	-44	V4 longer	5582
dia1a	ENSDART00000024677	191	NM_001007436.1	191	TCONS_00049854	5766	same	0	V4 longer	5575
ism2a	ENSDART00000123311	1976	XM_003200340.5	942	TCONS_00037258	7550	Ens95 longer	1034	V4 longer	5574
uhrf1bp1	ENSDART00000140986	189	XM_001921432.7	262	TCONS_00071965	5800	RefSeq longer	-73	V4 longer	5538
ensab	ENSDART00000088146	136	NM_001256731.1	136	TCONS_00032842	5663	same	0	V4 longer	5527
retreg2	ENSDART00000092277	486	NM_001080014.1	486	TCONS_00000257	6012	same	0	V4 longer	5526
atp6ap1la	ENSDART00000130573	662	XM_001340588.8	661	TCONS_00014206	6177	same	1	V4 longer	5515
ext1a	ENSDART00000159902	1058	NM_001012368.2	678	TCONS_00033598	6562	Ens95 longer	380	V4 longer	5504
stat5b	ENSDART00000124364	1042	NM_001003984.1	1042	TCONS_00017062	6540	same	0	V4 longer	5498
st3gal3b	ENSDART00000141188	901	XM_005163338.4	965	TCONS_00053024	6459	RefSeq longer	-64	V4 longer	5494
ttll11	ENSDART00000085684	85	NM_001077375.1	66	TCONS_00099975	5571	same	19	V4 longer	5486
si:dkey-166k12.1	ENSDART00000076915	62	XM_001341251.5	338	TCONS_00046693	5806	RefSeq longer	-276	V4 longer	5468
gal3st2	ENSDART00000155496	618	XM_009291903.3	746	TCONS_00028606	6210	RefSeq longer	-128	V4 longer	5464
oprk1	ENSDART00000009326	219	XM_005163421.4	861	TCONS_00050910	6325	RefSeq longer	-642	V4 longer	5464
uvrag	ENSDART00000028161	207	NM_201069.1	207	TCONS_00009311	5669	same	0	V4 longer	5462
apbb2b	ENSDART00000158344	522	XM_005168376.4	566	TCONS_00000842	5994	same	-44	V4 longer	5428
gramd1ba	ENSDART00000145862	855	XM_009305617.3	746	TCONS_00007548	6281	Ens95 longer	109	V4 longer	5426
si:ch211-194b1.1	ENSDART00000166000	2063	XM_001341758.8	982	TCONS_00081689	7487	Ens95 longer	1081	V4 longer	5424
KCNV1	ENSDART00000102591	306	XM_683312.5	1048	TCONS_00035900	6464	RefSeq longer	-742	V4 longer	5416
zgc:172139	ENSDART00000162529	229	NM_001327783.1	1168	TCONS_00098184	6551	RefSeq longer	-939	V4 longer	5383
snx27a	ENSDART00000144925	384	NM_001045100.1	58	TCONS_00045480	5760	Ens95 longer	326	V4 longer	5376
plxnb3	ENSDART00000144838	338	XM_009303770.3	805	TCONS_00117353	6176	RefSeq longer	-467	V4 longer	5371
diras1b	ENSDART00000137967	31	XM_005171306.4	2877	TCONS_00054154	8212	RefSeq longer	-2846	V4 longer	5335
clvs2	ENSDART00000075112	96	NM_001025545.2	85	TCONS_00059629	5424	same	11	V4 longer	5328
gpr12	ENSDART00000152054	2236	XM_021470318.1	3172	TCONS_00076617	8492	RefSeq longer	-936	V4 longer	5320
tmem150aa	ENSDART00000098545	108	NM_001045410.1	335	TCONS_00099532	5653	RefSeq longer	-227	V4 longer	5318
zgc:109949	ENSDART00000165551	707	NM_001020730.1	707	TCONS_00081455	6024	same	0	V4 longer	5317
phldb1b	ENSDART00000113142	816	XM_005157452.4	816	TCONS_00029837	6119	same	0	V4 longer	5303
hic2	ENSDART00000160046	289	NM_182869.2	291	TCONS_00005837	5572	same	-2	V4 longer	5281
iffo1a	ENSDART00000091615	592	XM_685073.8	1029	TCONS_00047652	6310	RefSeq longer	-437	V4 longer	5281
lrp3	ENSDART00000016265	1835	NM_001130634.1	70	TCONS_00112510	7102	Ens95 longer	1765	V4 longer	5267
gpr4	ENSDART00000156738	444	XM_005157675.4	219	TCONS_00030516	5698	Ens95 longer	225	V4 longer	5254
zgc:162171	ENSDART00000101408	206	NM_001082848.1	206	TCONS_00114839	5452	same	0	V4 longer	5246
sgsm2	ENSDART00000092357	280	XM_021466398.1	579	TCONS_00027701	5818	RefSeq longer	-299	V4 longer	5239
tspan5a	ENSDART00000126739	283	NM_001006047.1	292	TCONS_00116740	5523	same	-9	V4 longer	5231
si:ch211-125m10.6	ENSDART00000129576	280	XM_003201039.4	347	TCONS_00068684	5577	RefSeq longer	-67	V4 longer	5230
rap1gap2a	ENSDART00000137817	620	XM_017350966.2	708	TCONS_00028147	5933	RefSeq longer	-88	V4 longer	5225
ammecr1	ENSDART00000013814	347	NM_200581.1	323	TCONS_00065080	5538	same	24	V4 longer	5191
rgl2	ENSDART00000004052	346	XM_005158384.4	114	TCONS_00036228	5535	Ens95 longer	232	V4 longer	5189
si:dkeyp-68b7.10	ENSDART00000147966	103	XM_021468367.1	70	TCONS_00052161	5279	same	33	V4 longer	5176
slc17a6a	ENSDART00000003494	540	NM_001009982.1	540	TCONS_00079273	5708	same	0	V4 longer	5168
angpt1	ENSDART00000043713	494	NM_131813.1	6	TCONS_00049357	5642	Ens95 longer	488	V4 longer	5148
epha4b	ENSDART00000037292	342	NM_153658.1	342	TCONS_00051468	5452	same	0	V4 longer	5110
tmem63c	ENSDART00000156260	1240	XM_005158882.4	1045	TCONS_00038379	6349	Ens95 longer	195	V4 longer	5109
march2	ENSDART00000088419	704	NM_001044790.2	688	TCONS_00066484	5813	same	16	V4 longer	5109
glcci1a	ENSDART00000036854	818	NM_001079950.1	818	TCONS_00048537	5914	same	0	V4 longer	5096
hdac4	ENSDART00000169682	807	XM_005172529.4	1213	TCONS_00126889	6294	RefSeq longer	-406	V4 longer	5081
slc19a2	ENSDART00000083305	12	XM_005168735.4	2246	TCONS_00108578	7306	RefSeq longer	-2234	V4 longer	5060
igfbp2b	ENSDART00000025256	410	NM_001126464.1	410	TCONS_00124492	5464	same	0	V4 longer	5054
trim2a	ENSDART00000050445	643	NM_001014371.1	643	TCONS_00004039	5690	same	0	V4 longer	5047
fam198b	ENSDART00000112379	415	XM_689640.8	422	TCONS_00026410	5463	same	-7	V4 longer	5041
si:ch211-284e13.5	ENSDART00000135428	771	NM_001326577.1	222	TCONS_00100214	5811	Ens95 longer	549	V4 longer	5040
cacng4b	ENSDART00000112043	1039	NM_001328103.1	1564	TCONS_00087430	6594	RefSeq longer	-525	V4 longer	5030
si:dkeyp-51f12.2	ENSDART00000143026	288	XM_001919900.5	292	TCONS_00055689	5307	same	-4	V4 longer	5015
efnb3a	ENSDART00000185037	1777	XM_687578.6	3428	TCONS_00006731	8438	RefSeq longer	-1651	V4 longer	5010
ak5l	ENSDART00000029364	363	NM_001017540.2	345	TCONS_00104672	5360	same	18	V4 longer	4997
pax3b	ENSDART00000015843	18	NM_001328397.1	18	TCONS_00031247	4962	same	0	V4 longer	4944
zgc:162160	ENSDART00000084730	128	NM_001089393.1	128	TCONS_00036012	5064	same	0	V4 longer	4936
wnt10a	ENSDART00000007308	256	NM_130980.1	256	TCONS_00122860	5189	same	0	V4 longer	4933
olfml3a	ENSDART00000088697	177	NM_001045857.1	177	TCONS_00070859	5105	same	0	V4 longer	4928
kcnk13a	ENSDART00000017930	565	NM_001110117.2	565	TCONS_00039589	5491	same	0	V4 longer	4926
mtnr1bb	ENSDART00000078226	4	NM_131394.1	4	TCONS_00009002	4930	same	0	V4 longer	4926
zbtb34	ENSDART00000133300	1	NM_001122711.1	1	TCONS_00121389	4925	same	0	V4 longer	4924
rap1gap	ENSDART00000079035	802	NM_001123053.1	802	TCONS_00070740	5714	same	0	V4 longer	4912
ddr2l	ENSDART00000172523	70	XM_688610.8	712	TCONS_00102055	5622	RefSeq longer	-642	V4 longer	4910
ubald2	ENSDART00000184119	479	NM_001020768.1	479	TCONS_00087418	5382	same	0	V4 longer	4903
mitfb	ENSDART00000183978	21	XM_021469718.1	1806	TCONS_00071998	6697	RefSeq longer	-1785	V4 longer	4891
slc25a51a	ENSDART00000078610	89	NM_200755.1	89	TCONS_00000764	4979	same	0	V4 longer	4890
slc6a1a	ENSDART00000133701	127	NM_001045287.2	159	TCONS_00072138	5022	same	-32	V4 longer	4863
ptpn9a	ENSDART00000153768	710	XM_005162973.4	440	TCONS_00079735	5553	Ens95 longer	270	V4 longer	4843
cables2b	ENSDART00000030811	267	XM_001920838.6	469	TCONS_00070108	5303	RefSeq longer	-202	V4 longer	4834
slc48a1a	ENSDART00000031638	961	XM_009296974.3	625	TCONS_00073616	5791	Ens95 longer	336	V4 longer	4830
slc7a1	ENSDART00000146370	50	XM_005155277.4	1714	TCONS_00006802	6535	RefSeq longer	-1664	V4 longer	4821
drd1b	ENSDART00000056810	444	NM_001135976.2	445	TCONS_00124668	5255	same	-1	V4 longer	4810
ghrhra	ENSDART00000170470	263	NM_001131052.1	254	TCONS_00054883	5064	same	9	V4 longer	4801
stat6	ENSDART00000023218	809	NM_001130590.1	353	TCONS_00073198	5586	Ens95 longer	456	V4 longer	4777
b4galnt4a	ENSDART00000083407	1134	XM_001920840.7	51	TCONS_00078786	5906	Ens95 longer	1083	V4 longer	4772
trmt6	ENSDART00000062092	118	NM_001037392.1	118	TCONS_00059861	4886	same	0	V4 longer	4768
tll1	ENSDART00000054472	1095	NM_131010.1	1095	TCONS_00003768	5855	same	0	V4 longer	4760
arhgef37	ENSDART00000106039	739	XM_021481158.1	740	TCONS_00023871	5496	same	-1	V4 longer	4756
tmem169a	ENSDART00000030794	121	XM_005169384.4	125	TCONS_00013736	4872	same	-4	V4 longer	4747
pla2g4aa	ENSDART00000099913	258	NM_131295.2	258	TCONS_00050329	5000	same	0	V4 longer	4742
bmp1a	ENSDART00000127875	803	XM_017357365.2	861	TCONS_00122201	5599	RefSeq longer	-58	V4 longer	4738
camk1da	ENSDART00000104676	1180	NM_001123060.1	1180	TCONS_00088014	5918	same	0	V4 longer	4738
si:ch73-144d13.7	ENSDART00000154224	115	XM_017351129.2	149	TCONS_00029001	4887	same	-34	V4 longer	4738
caln1	ENSDART00000155163	1106	XM_021466346.1	1978	TCONS_00029770	6715	RefSeq longer	-872	V4 longer	4737
pgap3	ENSDART00000152737	430	XM_005156045.4	1640	TCONS_00016922	6374	RefSeq longer	-1210	V4 longer	4734
slc30a2	ENSDART00000050474	82	XM_009294893.3	2186	TCONS_00059531	6899	RefSeq longer	-2104	V4 longer	4713
fam161b	ENSDART00000123971	344	XM_692802.7	265	TCONS_00040739	5048	Ens95 longer	79	V4 longer	4704
si:ch211-274p24.4	ENSDART00000139677	185	XM_003200893.5	245	TCONS_00062222	4937	RefSeq longer	-60	V4 longer	4692
oprm1	ENSDART00000057611	213	NM_131707.2	213	TCONS_00019648	4900	same	0	V4 longer	4687
nmnat2	ENSDART00000003550	720	NM_200004.1	601	TCONS_00054020	5403	Ens95 longer	119	V4 longer	4683
mxd1	ENSDART00000134064	108	XM_693515.6	2935	TCONS_00102221	7608	RefSeq longer	-2827	V4 longer	4673
slc6a6a	ENSDART00000146306	678	NM_001126386.1	678	TCONS_00117277	5350	same	0	V4 longer	4672
fmnl2a	ENSDART00000133090	3277	XM_001345159.8	1093	TCONS_00125045	7940	Ens95 longer	2184	V4 longer	4663
rps6ka5	ENSDART00000085438	2112	XM_688458.8	5145	TCONS_00040542	9805	RefSeq longer	-3033	V4 longer	4660
tpbga	ENSDART00000166230	453	NM_194392.2	453	TCONS_00045714	5113	same	0	V4 longer	4660
abhd14a	ENSDART00000081228	377	NM_207066.2	377	TCONS_00066253	5026	same	0	V4 longer	4649
gipr	ENSDART00000154085	906	XM_005157739.4	848	TCONS_00028097	5544	Ens95 longer	58	V4 longer	4638
abca5	ENSDART00000155563	1368	XM_005156401.4	1285	TCONS_00016058	5991	Ens95 longer	83	V4 longer	4623
rnf165b	ENSDART00000147753	54	XM_005166679.3	317	TCONS_00117034	4939	RefSeq longer	-263	V4 longer	4622
fam131ba	ENSDART00000104607	884	XM_017352403.2	1546	TCONS_00045553	6148	RefSeq longer	-662	V4 longer	4602
sfxn3	ENSDART00000057867	478	NM_001080664.1	478	TCONS_00021537	5080	same	0	V4 longer	4602
dgat2	ENSDART00000137608	393	NM_001030196.1	384	TCONS_00009315	4985	same	9	V4 longer	4592
zgc:112998	ENSDART00000114352	19	NM_001013556.2	24	TCONS_00028730	4611	same	-5	V4 longer	4587
vezf1b	ENSDART00000086592	171	NM_001079963.1	171	TCONS_00030681	4741	same	0	V4 longer	4570
tmem267	ENSDART00000135082	601	NM_001003574.1	597	TCONS_00006280	5170	same	4	V4 longer	4569
xkr6b	ENSDART00000063725	775	NM_001012257.2	775	TCONS_00058500	5343	same	0	V4 longer	4568
snx33	ENSDART00000132927	1802	NM_001122855.2	1802	TCONS_00077968	6369	same	0	V4 longer	4567
zgc:171740	ENSDART00000065132	322	NM_001109726.1	322	TCONS_00061726	4872	same	0	V4 longer	4550
mpi	ENSDART00000149360	199	NM_001033110.1	199	TCONS_00077757	4743	same	0	V4 longer	4544
igf1ra	ENSDART00000010189	1271	NM_152968.1	39	TCONS_00044071	5807	Ens95 longer	1232	V4 longer	4536
capn12	ENSDART00000128707	477	XM_005173670.4	479	TCONS_00042674	5013	same	-2	V4 longer	4534
ppp2r2d	ENSDART00000165152	742	NM_212880.1	742	TCONS_00018201	5271	same	0	V4 longer	4529
zdhhc17	ENSDART00000103371	292	NM_001128382.1	292	TCONS_00087675	4812	same	0	V4 longer	4520
si:dkey-184a18.5	ENSDART00000141868	489	XM_003199318.5	7	TCONS_00008637	5007	Ens95 longer	482	V4 longer	4518
ldb1b	ENSDART00000190972	333	NM_131313.2	681	TCONS_00014329	5189	RefSeq longer	-348	V4 longer	4508
rcor3	ENSDART00000143792	160	XM_005161857.4	446	TCONS_00067376	4954	RefSeq longer	-286	V4 longer	4508
chpfa	ENSDART00000113847	20	XM_002663329.6	60	TCONS_00125273	4557	same	-40	V4 longer	4497
igdcc4	ENSDART00000113467	3081	XM_002662840.5	3083	TCONS_00115285	7578	same	-2	V4 longer	4495
phospho1	ENSDART00000055834	1100	NM_001003461.1	300	TCONS_00081837	5587	Ens95 longer	800	V4 longer	4487
trim62	ENSDART00000086296	172	NM_001080674.1	50	TCONS_00014113	4654	Ens95 longer	122	V4 longer	4482
cacna1da	ENSDART00000168528	110	XM_021479576.1	752	TCONS_00013987	5233	RefSeq longer	-642	V4 longer	4481
zgc:162971	ENSDART00000163659	26	NM_001089563.1	26	TCONS_00062749	4507	same	0	V4 longer	4481
ppp1r9a	ENSDART00000138687	963	XM_009294366.3	3751	TCONS_00046618	8225	RefSeq longer	-2788	V4 longer	4474
stk35	ENSDART00000128302	554	NM_001077616.1	554	TCONS_00073962	4981	same	0	V4 longer	4427
sept5b	ENSDART00000009134	68	XM_021479158.1	1173	TCONS_00009925	5598	RefSeq longer	-1105	V4 longer	4425
b3gat1a	ENSDART00000059344	221	XM_005173645.4	6958	TCONS_00044476	11380	RefSeq longer	-6737	V4 longer	4422
znf740b	ENSDART00000132273	1056	XM_021469848.1	1172	TCONS_00073780	5593	RefSeq longer	-116	V4 longer	4421
pip5k1aa	ENSDART00000163179	931	NM_001020602.1	928	TCONS_00047790	5351	same	3	V4 longer	4420
HACD4	ENSDART00000157618	187	NM_001200011.2	188	TCONS_00114630	4603	same	-1	V4 longer	4415
znf362b	ENSDART00000089750	87	NM_001089548.2	61	TCONS_00072901	4489	same	26	V4 longer	4402
birc7	ENSDART00000143618	51	NM_001098768.1	51	TCONS_00070270	4453	same	0	V4 longer	4402
igf2bp2a	ENSDART00000180832	1021	XM_005167469.4	2327	TCONS_00125321	6718	RefSeq longer	-1306	V4 longer	4391
zgc:123217	ENSDART00000106650	256	NM_001037403.1	256	TCONS_00014571	4645	same	0	V4 longer	4389
kctd2	ENSDART00000035925	280	NM_001045434.1	210	TCONS_00017553	4663	Ens95 longer	70	V4 longer	4383
ttyh2	ENSDART00000009172	589	XM_009306863.3	627	TCONS_00016037	5009	same	-38	V4 longer	4382
cspg4	ENSDART00000112782	47	XM_001923422.6	345	TCONS_00079746	4725	RefSeq longer	-298	V4 longer	4380
otofb	ENSDART00000149773	2451	XM_017351874.2	318	TCONS_00040935	6830	Ens95 longer	2133	V4 longer	4379
ing5a	ENSDART00000157620	301	NM_001100049.2	149	TCONS_00067611	4680	Ens95 longer	152	V4 longer	4379
gpc1b	ENSDART00000125971	633	NM_201020.1	636	TCONS_00051738	5003	same	-3	V4 longer	4367
si:dkey-160o24.3	ENSDART00000163059	817	XM_021481110.1	262	TCONS_00023324	5178	Ens95 longer	555	V4 longer	4361
sdcbp	ENSDART00000050077	163	NM_214798.2	163	TCONS_00116483	4521	same	0	V4 longer	4358
znf982	ENSDART00000153566	58	XM_017351854.2	438	TCONS_00038608	4795	RefSeq longer	-380	V4 longer	4357
rab9b	ENSDART00000162322	149	XM_001339226.7	1229	TCONS_00025446	5583	RefSeq longer	-1080	V4 longer	4354
pcdh2ab11	ENSDART00000161674	903	NM_001007762.1	547	ENSDART00000160123	5251	Ens95 longer	356	V4 longer	4348
pcdh2ab11	ENSDART00000054889	547	NM_001007762.1	547	ENSDART00000160123	4895	same	0	V4 longer	4348
pcdh2ab11	ENSDART00000054891	106	NM_001007762.1	547	ENSDART00000160123	4895	RefSeq longer	-441	V4 longer	4348
pcdh2ab11	ENSDART00000081870	547	NM_001007762.1	547	ENSDART00000160123	4895	same	0	V4 longer	4348
pcdh2ab11	ENSDART00000106704	421	NM_001007762.1	547	ENSDART00000160123	4895	RefSeq longer	-126	V4 longer	4348
pcdh2ab11	ENSDART00000128659	547	NM_001007762.1	547	ENSDART00000160123	4895	same	0	V4 longer	4348
pcdh2ab11	ENSDART00000130712	547	NM_001007762.1	547	ENSDART00000160123	4895	same	0	V4 longer	4348
pcdh2ab11	ENSDART00000157949	547	NM_001007762.1	547	ENSDART00000160123	4895	same	0	V4 longer	4348
pcdh2ab11	ENSDART00000160205	547	NM_001007762.1	547	ENSDART00000160123	4895	same	0	V4 longer	4348
pcdh2ab11	ENSDART00000162537	547	NM_001007762.1	547	ENSDART00000160123	4895	same	0	V4 longer	4348
pcdh2ab11	ENSDART00000169653	547	NM_001007762.1	547	ENSDART00000160123	4895	same	0	V4 longer	4348
pcdh2ab11	ENSDART00000189869	347	NM_001007762.1	547	ENSDART00000160123	4895	RefSeq longer	-200	V4 longer	4348
entpd4	ENSDART00000056074	494	XM_005167218.4	622	TCONS_00119441	4963	RefSeq longer	-128	V4 longer	4341
frs3	ENSDART00000155554	2240	XM_002662499.6	2427	TCONS_00106944	6743	RefSeq longer	-187	V4 longer	4316
pick1	ENSDART00000104977	392	NM_001077336.1	395	TCONS_00081354	4708	same	-3	V4 longer	4313
atp13a3	ENSDART00000173216	1625	XM_009306171.3	299	TCONS_00013837	5934	Ens95 longer	1326	V4 longer	4309
rab27a	ENSDART00000165301	603	NM_001030257.1	607	TCONS_00041193	4910	same	-4	V4 longer	4303
efna3b	ENSDART00000161087	882	NM_131854.3	868	TCONS_00032448	5167	same	14	V4 longer	4285
ihhb	ENSDART00000081760	233	NM_131088.1	233	TCONS_00107950	4507	same	0	V4 longer	4274
sgcg	ENSDART00000144381	6625	NM_001003748.2	510	TCONS_00027280	10898	Ens95 longer	6115	V4 longer	4273
pnpla7a	ENSDART00000146717	506	NM_199524.1	506	ENSDART00000180323	4771	same	0	V4 longer	4265
gnai3	ENSDART00000047528	275	NM_001111250.1	275	TCONS_00118232	4537	same	0	V4 longer	4262
zgc:153119	ENSDART00000057733	160	NM_001077275.1	160	TCONS_00042632	4409	same	0	V4 longer	4249
impad1	ENSDART00000080925	279	NM_001037568.1	279	TCONS_00052812	4524	same	0	V4 longer	4245
parvaa	ENSDART00000064187	915	NM_001002872.2	915	TCONS_00078376	5160	same	0	V4 longer	4245
slc5a11	ENSDART00000048218	247	NM_001007300.1	247	TCONS_00085170	4489	same	0	V4 longer	4242
znf618	ENSDART00000185309	1646	NM_001326692.1	1646	TCONS_00101570	5884	same	0	V4 longer	4238
aatka	ENSDART00000149914	1300	XM_001344016.8	1054	TCONS_00087096	5529	Ens95 longer	246	V4 longer	4229
pdgfc	ENSDART00000074710	996	XM_683962.8	1001	TCONS_00026404	5225	same	-5	V4 longer	4224
rab8a	ENSDART00000149062	1586	NM_001089562.2	705	TCONS_00055050	5809	Ens95 longer	881	V4 longer	4223
mlec	ENSDART00000131372	384	NM_001113618.1	384	TCONS_00121651	4605	same	0	V4 longer	4221
ntrk1	ENSDART00000027013	579	NM_001301356.1	579	TCONS_00036233	4799	same	0	V4 longer	4220
itpkb	ENSDART00000136303	899	XM_005160841.4	883	TCONS_00059516	5108	same	16	V4 longer	4209
dolpp1	ENSDART00000053609	614	NM_001007061.1	614	TCONS_00060485	4819	same	0	V4 longer	4205
map3k12	ENSDART00000161484	713	NM_207094.1	715	TCONS_00122425	4915	same	-2	V4 longer	4200
fbxo30a	ENSDART00000081447	130	NM_201151.1	130	TCONS_00036891	4328	same	0	V4 longer	4198
slc35a3b	ENSDART00000011906	474	XM_005171166.4	832	TCONS_00049917	5023	RefSeq longer	-358	V4 longer	4191
soul4	ENSDART00000171704	476	NM_001245995.1	476	TCONS_00069606	4642	same	0	V4 longer	4166
si:ch211-160d20.3	ENSDART00000004129	516	XM_009293786.3	846	TCONS_00042690	5011	RefSeq longer	-330	V4 longer	4165
syt3	ENSDART00000151698	404	XM_005163974.4	1701	TCONS_00085825	5862	RefSeq longer	-1297	V4 longer	4161
itgb3b	ENSDART00000006908	321	NM_001082948.1	321	TCONS_00015468	4480	same	0	V4 longer	4159
dnal4a	ENSDART00000133898	1676	NM_001003603.1	1676	TCONS_00082341	5822	same	0	V4 longer	4146
trpc1	ENSDART00000139191	227	NM_001198661.2	42	TCONS_00074384	4369	Ens95 longer	185	V4 longer	4142
egln2	ENSDART00000152603	1486	XM_682924.8	3541	TCONS_00027247	7679	RefSeq longer	-2055	V4 longer	4138
si:ch73-290k24.6	ENSDART00000135602	412	XM_003201255.5	473	TCONS_00071898	4609	RefSeq longer	-61	V4 longer	4136
si:dkey-217l24.1	ENSDART00000156517	768	XM_003201442.5	529	TCONS_00078661	4887	Ens95 longer	239	V4 longer	4119
rhogb	ENSDART00000022562	1234	NM_200040.2	1208	TCONS_00061983	5353	same	26	V4 longer	4119
rybpa	ENSDART00000055038	1019	NM_201317.2	1126	TCONS_00072380	5239	RefSeq longer	-107	V4 longer	4113
lamtor1	ENSDART00000110112	31	NM_001282140.1	31	TCONS_00031323	4133	same	0	V4 longer	4102
lrrfip1b	ENSDART00000141597	834	XM_005168724.4	835	TCONS_00108523	4935	same	-1	V4 longer	4100
cabp1a	ENSDART00000012391	176	NM_001005962.2	173	TCONS_00121654	4272	same	3	V4 longer	4096
fam131a	ENSDART00000126718	749	NM_001114579.1	750	TCONS_00050215	4843	same	-1	V4 longer	4093
ptbp3	ENSDART00000146727	168	XM_009305171.3	3632	TCONS_00008484	7724	RefSeq longer	-3464	V4 longer	4092
dtna	ENSDART00000105680	270	XM_009297592.3	223	TCONS_00077267	4357	same	47	V4 longer	4087
sdr42e2	ENSDART00000155759	101	XM_003198188.5	340	TCONS_00083887	4426	RefSeq longer	-239	V4 longer	4086
smurf2	ENSDART00000055491	963	XM_005171584.4	994	TCONS_00085496	5075	same	-31	V4 longer	4081
ikbkb	ENSDART00000140265	140	XM_021478277.1	918	TCONS_00117094	4995	RefSeq longer	-778	V4 longer	4077
wash1	ENSDART00000136333	200	NM_001110450.1	200	TCONS_00041372	4270	same	0	V4 longer	4070
zbtb44	ENSDART00000086795	11	XM_005171909.4	429	TCONS_00103144	4495	RefSeq longer	-418	V4 longer	4066
l1camb	ENSDART00000132175	530	XM_009296546.3	2785	TCONS_00071992	6849	RefSeq longer	-2255	V4 longer	4064
pomgnt2	ENSDART00000139432	528	NM_001012384.2	528	TCONS_00031824	4591	same	0	V4 longer	4063
gdf5	ENSDART00000149343	839	XM_002662541.5	833	TCONS_00110207	4891	same	6	V4 longer	4052
tceanc2	ENSDART00000091497	206	NM_001346251.1	250	TCONS_00049953	4299	same	-44	V4 longer	4049
gpr132b	ENSDART00000158098	293	NM_001025547.2	293	TCONS_00058469	4340	same	0	V4 longer	4047
nckap5l	ENSDART00000146332	321	XM_005162163.4	321	ENSDART00000184854	4366	same	0	V4 longer	4045
tmem160	ENSDART00000147086	532	NM_001128700.1	89	TCONS_00027254	4574	Ens95 longer	443	V4 longer	4042
si:ch73-95l15.5	ENSDART00000156515	126	NM_200166.2	126	ENSDART00000188800	4168	same	0	V4 longer	4042
dnajc5aa	ENSDART00000063057	259	NM_001002464.1	235	TCONS_00118032	4291	same	24	V4 longer	4032
si:dkey-94l16.4	ENSDART00000152272	249	XM_009306365.3	991	TCONS_00014444	5023	RefSeq longer	-742	V4 longer	4032
ppfia4	ENSDART00000193980	2409	XM_009305991.3	1322	TCONS_00011102	6434	Ens95 longer	1087	V4 longer	4025
rasgrp3	ENSDART00000114212	1010	NM_001110464.1	1029	TCONS_00037440	5054	same	-19	V4 longer	4025
b4galt4	ENSDART00000172097	623	NM_001007401.1	616	TCONS_00104895	4640	same	7	V4 longer	4017
nicn1	ENSDART00000101580	420	NM_001003610.2	420	TCONS_00067225	4434	same	0	V4 longer	4014
dpy19l1l	ENSDART00000023452	29	NM_001002868.1	29	TCONS_00033413	4039	same	0	V4 longer	4010
prkg1a	ENSDART00000016960	727	XM_005157058.4	820	TCONS_00020458	4827	RefSeq longer	-93	V4 longer	4007
dctn1a	ENSDART00000102795	4	XM_021477458.1	175	TCONS_00113929	4169	RefSeq longer	-171	V4 longer	3994
crispld1a	ENSDART00000138227	811	XM_001920386.6	534	TCONS_00074717	4803	Ens95 longer	277	V4 longer	3992
cadm3	ENSDART00000079596	106	XM_005171391.4	1205	TCONS_00054586	5190	RefSeq longer	-1099	V4 longer	3985
slc39a1	ENSDART00000062257	780	NM_212583.2	783	TCONS_00114433	4765	same	-3	V4 longer	3982
si:dkey-228d14.5	ENSDART00000080107	778	NM_001201356.1	775	TCONS_00021529	4742	same	3	V4 longer	3964
tmem106bb	ENSDART00000137292	339	NM_001045052.1	339	TCONS_00048838	4297	same	0	V4 longer	3958
tmem200a	ENSDART00000152321	103	XM_009294516.3	581	TCONS_00055505	4535	RefSeq longer	-478	V4 longer	3954
tmub2	ENSDART00000078974	83	NM_001005573.1	3	TCONS_00082093	4030	Ens95 longer	80	V4 longer	3947
limch1a	ENSDART00000132379	174	XM_005168356.4	224	TCONS_00000773	4170	same	-50	V4 longer	3946
mllt1b	ENSDART00000156722	552	NM_001115051.1	481	ENSDART00000185833	4495	Ens95 longer	71	V4 longer	3943
vamp2	ENSDART00000079454	338	NM_200005.1	329	TCONS_00008917	4279	same	9	V4 longer	3941
rps6kl1	ENSDART00000156806	149	XM_005158945.4	286	TCONS_00041027	4226	RefSeq longer	-137	V4 longer	3940
hectd2	ENSDART00000086984	597	XM_009306551.3	845	TCONS_00017123	4781	RefSeq longer	-248	V4 longer	3936
ergic2	ENSDART00000073651	202	NM_200407.1	181	TCONS_00078622	4131	same	21	V4 longer	3929
jdp2a	ENSDART00000058707	301	XM_005158934.4	270	TCONS_00040922	4225	same	31	V4 longer	3924
sema3gb	ENSDART00000188130	77	XM_005167032.4	342	TCONS_00118089	4266	RefSeq longer	-265	V4 longer	3924
unc93b1	ENSDART00000159686	333	XM_009293277.3	315	TCONS_00001797	4254	same	18	V4 longer	3921
tmem26a	ENSDART00000113655	282	XM_001334449.7	176	TCONS_00039750	4202	Ens95 longer	106	V4 longer	3920
rragcb	ENSDART00000164611	231	NM_001100068.1	231	TCONS_00047369	4145	same	0	V4 longer	3914
cnnm2a	ENSDART00000087001	300	NM_001144785.1	300	TCONS_00019867	4207	same	0	V4 longer	3907
sorcs3b	ENSDART00000154667	441	XM_679014.7	408	TCONS_00039702	4345	same	33	V4 longer	3904
znf207a	ENSDART00000044859	553	NM_213197.1	553	TCONS_00082918	4457	same	0	V4 longer	3904
nagpa	ENSDART00000126129	648	NM_001109715.2	648	TCONS_00033318	4546	same	0	V4 longer	3898
CSMD3	ENSDART00000108507	644	XM_017352314.2	672	TCONS_00049296	4569	same	-28	V4 longer	3897
fam160a1a	ENSDART00000163140	3048	XM_009291266.3	879	TCONS_00000998	6943	Ens95 longer	2169	V4 longer	3895
slc50a1	ENSDART00000006093	438	NM_001012497.1	1170	TCONS_00032456	5058	RefSeq longer	-732	V4 longer	3888
si:dkeyp-66d1.7	ENSDART00000154726	27	XM_685301.8	255	TCONS_00051363	4132	RefSeq longer	-228	V4 longer	3877
fosaa	ENSDART00000058706	72	XM_009293306.3	144	TCONS_00040926	4018	RefSeq longer	-72	V4 longer	3874
zgc:198371	ENSDART00000053661	224	NM_001012252.1	278	TCONS_00071146	4152	RefSeq longer	-54	V4 longer	3874
napba	ENSDART00000167995	1625	NM_001020655.1	1613	TCONS_00038954	5498	same	12	V4 longer	3873
nphp3	ENSDART00000110629	325	XM_009297293.3	492	TCONS_00074519	4365	RefSeq longer	-167	V4 longer	3873
pdlim3b	ENSDART00000005568	300	XM_005157234.4	301	TCONS_00025897	4165	same	-1	V4 longer	3864
si:dkey-117i10.1	ENSDART00000143715	282	NM_001328093.1	282	TCONS_00081671	4145	same	0	V4 longer	3863
rab30	ENSDART00000055220	1105	NM_001002750.2	1101	TCONS_00029520	4967	same	4	V4 longer	3862
si:ch73-62l21.1	ENSDART00000151630	304	XM_021469223.1	2617	TCONS_00060994	6479	RefSeq longer	-2313	V4 longer	3862
kcng3	ENSDART00000152931	641	XM_021480326.1	1167	TCONS_00017471	5028	RefSeq longer	-526	V4 longer	3861
pcdh15b	ENSDART00000106391	90	NM_001012486.1	90	TCONS_00016777	3951	same	0	V4 longer	3861
si:ch73-287m6.1	ENSDART00000170510	114	XM_009295363.3	114	TCONS_00061145	3974	same	0	V4 longer	3860
ppp6r2b	ENSDART00000141132	224	XM_003200421.5	3565	TCONS_00043515	7424	RefSeq longer	-3341	V4 longer	3859
zgc:92912	ENSDART00000154253	519	NM_001002532.1	491	TCONS_00031874	4375	same	28	V4 longer	3856
csmd2	ENSDART00000132471	1021	XM_688741.9	336	TCONS_00049051	4870	Ens95 longer	685	V4 longer	3849
tnr	ENSDART00000015827	529	XM_005171279.4	1857	TCONS_00051139	5695	RefSeq longer	-1328	V4 longer	3838
frmd3	ENSDART00000139494	57	XM_009304291.3	3654	TCONS_00122120	7491	RefSeq longer	-3597	V4 longer	3837
ankmy2a	ENSDART00000003674	833	NM_199894.1	833	TCONS_00030848	4665	same	0	V4 longer	3832
kcnab2b	ENSDART00000086117	622	NM_001328419.1	698	TCONS_00070627	4525	RefSeq longer	-76	V4 longer	3827
me2	ENSDART00000165308	225	NM_001003627.2	18	TCONS_00098776	4041	Ens95 longer	207	V4 longer	3816
ppp1r16a	ENSDART00000152257	1624	XM_001334437.5	1351	TCONS_00014878	5433	Ens95 longer	273	V4 longer	3809
tead1a	ENSDART00000125925	133	XM_009297895.3	1240	TCONS_00078378	5049	RefSeq longer	-1107	V4 longer	3809
lpar1	ENSDART00000172625	367	NM_001004502.2	368	TCONS_00006273	4173	same	-1	V4 longer	3805
si:dkey-58f10.12	ENSDART00000135267	386	XM_021476565.1	464	TCONS_00100246	4269	RefSeq longer	-78	V4 longer	3805
otx5	ENSDART00000063835	647	NM_181331.3	647	TCONS_00028909	4442	same	0	V4 longer	3795
ccdc85cb	ENSDART00000114851	558	XM_005160350.4	563	TCONS_00057976	4357	same	-5	V4 longer	3794
zgc:171844	ENSDART00000193762	1454	NM_001127478.1	1455	TCONS_00082411	5244	same	-1	V4 longer	3789
antxr1b	ENSDART00000114966	379	XM_679053.7	190	TCONS_00007642	4161	Ens95 longer	189	V4 longer	3782
tmem240a	ENSDART00000139974	487	XM_009296918.3	1097	TCONS_00073037	4875	RefSeq longer	-610	V4 longer	3778
vti1b	ENSDART00000057379	962	NM_201036.1	963	TCONS_00022161	4736	same	-1	V4 longer	3773
tmem218	ENSDART00000140988	282	XM_021479118.1	819	TCONS_00007123	4589	RefSeq longer	-537	V4 longer	3770
ccdc28b	ENSDART00000135200	154	NM_001145573.1	154	TCONS_00020220	3923	same	0	V4 longer	3769
frs2a	ENSDART00000067423	48	XM_005164455.4	641	TCONS_00087658	4408	RefSeq longer	-593	V4 longer	3767
chdh	ENSDART00000158789	86	XM_002663255.5	975	TCONS_00122329	4741	RefSeq longer	-889	V4 longer	3766
rab3db	ENSDART00000161403	777	NM_001002679.1	766	TCONS_00081768	4542	same	11	V4 longer	3765
kcnab1a	ENSDART00000059394	1330	XM_021467647.1	1330	TCONS_00042589	5094	same	0	V4 longer	3764
vat1	ENSDART00000078982	2584	NM_001007051.3	2584	TCONS_00082085	6347	same	0	V4 longer	3763
zgc:113278	ENSDART00000012445	295	NM_001014341.1	295	TCONS_00069896	4052	same	0	V4 longer	3757
gabrr2a	ENSDART00000074936	132	XM_017351674.2	211	TCONS_00037188	3959	RefSeq longer	-79	V4 longer	3748
gprc5ba	ENSDART00000155853	434	NM_001324456.1	438	TCONS_00087502	4184	same	-4	V4 longer	3746
pkdcca	ENSDART00000050934	142	NM_001161598.1	142	TCONS_00020900	3883	same	0	V4 longer	3741
mboat2a	ENSDART00000146590	1082	XM_005158749.4	1072	TCONS_00040427	4814	same	10	V4 longer	3732
si:ch211-282j22.3	ENSDART00000024720	229	XM_003200833.5	469	TCONS_00063357	4198	RefSeq longer	-240	V4 longer	3729
im:7145024	ENSDART00000154207	551	XM_701282.9	551	TCONS_00078107	4277	same	0	V4 longer	3726
tmem168b	ENSDART00000089596	514	XM_681870.7	113	TCONS_00080466	4229	Ens95 longer	401	V4 longer	3715
cdip1	ENSDART00000156822	1183	NM_001099242.1	1183	TCONS_00086887	4895	same	0	V4 longer	3712
asxl2	ENSDART00000108514	495	XM_005158855.4	609	TCONS_00040514	4316	RefSeq longer	-114	V4 longer	3707
ppp1r9bb	ENSDART00000091489	310	XM_009306518.3	371	TCONS_00014749	4061	RefSeq longer	-61	V4 longer	3690
mylk4b	ENSDART00000077767	675	XM_005160604.4	704	TCONS_00058927	4391	same	-29	V4 longer	3687
vclb	ENSDART00000110304	160	NM_001317752.1	160	TCONS_00016227	3845	same	0	V4 longer	3685
si:dkeyp-113d7.10	ENSDART00000141237	582	XM_009293997.3	2389	TCONS_00045286	6070	RefSeq longer	-1807	V4 longer	3681
adam11	ENSDART00000110503	931	XM_021480273.1	453	TCONS_00017081	4602	Ens95 longer	478	V4 longer	3671
lrrc8aa	ENSDART00000148138	503	NM_001029949.1	503	TCONS_00060514	4174	same	0	V4 longer	3671
gtf3aa	ENSDART00000049331	363	NM_001003866.1	359	TCONS_00104916	4031	same	4	V4 longer	3668
npy2rl	ENSDART00000152424	132	NM_001327802.1	1563	TCONS_00000446	5230	RefSeq longer	-1431	V4 longer	3667
nrl	ENSDART00000168271	73	NM_001040331.1	83	TCONS_00055427	3718	same	-10	V4 longer	3635
xkr8.3	ENSDART00000058513	139	NM_001006014.2	144	TCONS_00048517	3772	same	-5	V4 longer	3628
sacm1lb	ENSDART00000083513	321	NM_001080624.1	321	TCONS_00033804	3944	same	0	V4 longer	3623
rpl26	ENSDART00000168874	39	NM_213113.2	41	ENSDART00000188151	3662	same	-2	V4 longer	3621
trip6	ENSDART00000173881	1541	XM_001922796.6	1541	TCONS_00114692	5155	same	0	V4 longer	3614
erbb4a	ENSDART00000092118	304	NM_001143751.1	10	TCONS_00000292	3915	Ens95 longer	294	V4 longer	3611
slc25a32b	ENSDART00000032309	93	NM_001013336.2	86	TCONS_00033591	3699	same	7	V4 longer	3606
ago1	ENSDART00000156255	70	XM_005158472.4	2516	TCONS_00036413	6108	RefSeq longer	-2446	V4 longer	3592
hid1a	ENSDART00000157038	538	XM_017354836.2	538	TCONS_00087270	4119	same	0	V4 longer	3581
camk2a	ENSDART00000039571	424	NM_001017741.2	435	TCONS_00065054	4014	same	-11	V4 longer	3579
rbpjb	ENSDART00000092580	1602	NM_001083551.1	1591	TCONS_00113499	5179	same	11	V4 longer	3577
slc1a9	ENSDART00000161092	17	NM_001190759.1	17	TCONS_00128471	3591	same	0	V4 longer	3574
mturn	ENSDART00000108784	136	NM_001144806.1	136	TCONS_00047179	3709	same	0	V4 longer	3573
ttc39a	ENSDART00000146469	634	XM_002663097.5	1019	TCONS_00120437	4590	RefSeq longer	-385	V4 longer	3571
ino80db	ENSDART00000036927	271	NM_001007765.1	271	ENSDART00000182182	3836	same	0	V4 longer	3565
socs2	ENSDART00000141671	671	XM_005164748.4	1322	TCONS_00094093	4887	RefSeq longer	-651	V4 longer	3565
zak	ENSDART00000183452	894	NM_001327940.1	894	TCONS_00124953	4456	same	0	V4 longer	3562
faim2b	ENSDART00000172885	301	XM_001344881.7	240	TCONS_00012387	3857	Ens95 longer	61	V4 longer	3556
col24a1	ENSDART00000150103	94	XM_002666568.5	382	TCONS_00074144	3929	RefSeq longer	-288	V4 longer	3547
fhdc3	ENSDART00000079194	332	NM_001017649.1	327	ENSDART00000182967	3876	same	5	V4 longer	3544
naif1	ENSDART00000143242	49	XM_009303707.3	1368	TCONS_00117116	4909	RefSeq longer	-1319	V4 longer	3541
fbxl3a	ENSDART00000160869	433	XM_009304564.3	697	TCONS_00125506	4235	RefSeq longer	-264	V4 longer	3538
hsd17b2	ENSDART00000066985	67	XM_005163177.4	272	TCONS_00079325	3803	RefSeq longer	-205	V4 longer	3531
pou4f2	ENSDART00000124112	1637	NM_212807.1	67	TCONS_00001432	5161	Ens95 longer	1570	V4 longer	3524
zgc:113227	ENSDART00000065568	311	NM_001014319.2	311	TCONS_00105501	3835	same	0	V4 longer	3524
klhl24a	ENSDART00000098132	211	NM_001077340.1	211	TCONS_00051634	3727	same	0	V4 longer	3516
ephb6	ENSDART00000147483	489	XM_005173518.4	550	TCONS_00034315	4063	RefSeq longer	-61	V4 longer	3513
rnf11b	ENSDART00000098691	805	NM_001128408.1	805	TCONS_00120434	4316	same	0	V4 longer	3511
vps26bl	ENSDART00000077785	227	NM_001002415.2	227	TCONS_00009308	3733	same	0	V4 longer	3506
dia1b	ENSDART00000137293	214	XM_005162483.4	218	TCONS_00075998	3715	same	-4	V4 longer	3497
rhoua	ENSDART00000046360	987	NM_001007443.1	987	TCONS_00021699	4480	same	0	V4 longer	3493
cdc42ep1a	ENSDART00000152844	211	XM_021480298.1	257	TCONS_00017318	3743	same	-46	V4 longer	3486
dkk2	ENSDART00000114098	297	NM_001111209.1	297	TCONS_00005006	3776	same	0	V4 longer	3479
oxnad1	ENSDART00000151237	1487	NM_001110456.1	1487	TCONS_00045969	4963	same	0	V4 longer	3476
fgd4a	ENSDART00000168386	856	NM_001177933.1	848	TCONS_00041635	4311	same	8	V4 longer	3455
aadac	ENSDART00000093133	224	XM_009291389.3	386	TCONS_00029071	3839	RefSeq longer	-162	V4 longer	3453
mybl2a	ENSDART00000136287	113	NM_001309826.1	113	TCONS_00069919	3564	same	0	V4 longer	3451
lrrc3b	ENSDART00000092183	32	XM_005173724.4	1617	TCONS_00045098	5067	RefSeq longer	-1585	V4 longer	3450
pou6f2	ENSDART00000144186	1835	XM_017353999.2	168	TCONS_00074547	5274	Ens95 longer	1667	V4 longer	3439
b4galt1l	ENSDART00000168437	233	XM_005157336.4	586	TCONS_00024747	4025	RefSeq longer	-353	V4 longer	3439
MAP3K13	ENSDART00000140771	163	XM_017357860.2	840	TCONS_00127050	4279	RefSeq longer	-677	V4 longer	3439
tbc1d4	ENSDART00000143766	326	XM_002663395.5	979	TCONS_00123757	4414	RefSeq longer	-653	V4 longer	3435
plrdgb	ENSDART00000168996	202	NM_131575.1	202	TCONS_00062239	3636	same	0	V4 longer	3434
sgpp1	ENSDART00000141420	1925	XM_001343183.7	3209	TCONS_00022464	6641	RefSeq longer	-1284	V4 longer	3432
si:ch211-194e18.2	ENSDART00000092257	563	XM_021476988.1	316	TCONS_00107903	3993	Ens95 longer	247	V4 longer	3430
trub1	ENSDART00000149077	673	NM_001128687.1	21	TCONS_00017661	4098	Ens95 longer	652	V4 longer	3425
gtf3c2	ENSDART00000020969	465	XM_005160828.4	238	TCONS_00057039	3885	Ens95 longer	227	V4 longer	3420
fancc	ENSDART00000077554	245	XM_005167179.2	245	TCONS_00118643	3665	same	0	V4 longer	3420
spon1a	ENSDART00000016983	549	NM_131515.1	549	TCONS_00042337	3959	same	0	V4 longer	3410
gria1b	ENSDART00000044735	761	NM_205730.2	761	TCONS_00064036	4165	same	0	V4 longer	3404
ndst2b	ENSDART00000153022	322	XM_005156372.4	878	TCONS_00015974	4282	RefSeq longer	-556	V4 longer	3404
rpz4	ENSDART00000058324	303	XM_005158424.4	340	TCONS_00033546	3743	same	-37	V4 longer	3403
lrrc4ba	ENSDART00000150958	2002	XM_021474042.1	51	TCONS_00085813	5400	Ens95 longer	1951	V4 longer	3398
slc17a7a	ENSDART00000104481	43	NM_001098755.1	28	TCONS_00081870	3439	same	15	V4 longer	3396
peli1b	ENSDART00000092948	207	NM_001077601.2	207	TCONS_00039909	3600	same	0	V4 longer	3393
she	ENSDART00000142241	164	XM_684895.8	30	TCONS_00032425	3554	Ens95 longer	134	V4 longer	3390
arhgef2	ENSDART00000078306	1164	XM_005157849.4	207	TCONS_00031769	4550	Ens95 longer	957	V4 longer	3386
oxtrl	ENSDART00000064853	266	XM_005168771.4	415	TCONS_00107199	3800	RefSeq longer	-149	V4 longer	3385
ctdspl2a	ENSDART00000087978	919	NM_001077544.1	919	TCONS_00079113	4300	same	0	V4 longer	3381
ptk2aa	ENSDART00000167372	499	NM_198819.1	513	TCONS_00045112	3892	same	-14	V4 longer	3379
lrrc28	ENSDART00000080160	167	XM_021477722.1	505	TCONS_00111121	3881	RefSeq longer	-338	V4 longer	3376
rnf150a	ENSDART00000035713	382	NM_001145572.1	382	TCONS_00002302	3758	same	0	V4 longer	3376
rab4a	ENSDART00000004420	921	NM_001126381.1	921	TCONS_00021693	4288	same	0	V4 longer	3367
tp73	ENSDART00000130673	395	XM_009304274.3	2325	TCONS_00119370	5689	RefSeq longer	-1930	V4 longer	3364
bri3bp	ENSDART00000014434	275	NM_001089335.1	275	TCONS_00102377	3637	same	0	V4 longer	3362
march5	ENSDART00000043069	245	NM_001082827.2	245	TCONS_00022607	3604	same	0	V4 longer	3359
bsnd	ENSDART00000122298	339	NM_001305623.1	342	TCONS_00055696	3693	same	-3	V4 longer	3351
slc24a5	ENSDART00000033574	401	NM_001030280.1	401	TCONS_00041294	3752	same	0	V4 longer	3351
vgll4a	ENSDART00000135933	2182	XM_005161921.4	1412	TCONS_00069964	5522	Ens95 longer	770	V4 longer	3340
zgc:113090	ENSDART00000075277	606	NM_001020712.1	606	TCONS_00086019	3945	same	0	V4 longer	3339
drd2a	ENSDART00000149830	872	XM_009291617.3	1651	TCONS_00030171	4987	RefSeq longer	-779	V4 longer	3336
kcnk1a	ENSDART00000066259	116	NM_001098753.2	116	TCONS_00015768	3446	same	0	V4 longer	3330
ajap1	ENSDART00000172190	4919	XM_021478418.1	688	TCONS_00117937	8231	Ens95 longer	4231	V4 longer	3312
peak1	ENSDART00000154404	237	XM_001921567.6	3877	TCONS_00077997	7189	RefSeq longer	-3640	V4 longer	3312
crlf1b	ENSDART00000007321	243	XM_017353164.2	321	TCONS_00066705	3623	RefSeq longer	-78	V4 longer	3302
f2rl1.1	ENSDART00000099733	383	NM_001079805.1	383	TCONS_00063041	3685	same	0	V4 longer	3302
itgb8	ENSDART00000136138	439	XM_021468203.1	118	TCONS_00045129	3730	Ens95 longer	321	V4 longer	3291
thrab	ENSDART00000153187	10	XM_001920978.7	3381	TCONS_00017390	6659	RefSeq longer	-3371	V4 longer	3278
znf385b	ENSDART00000140526	129	XM_005167877.4	129	TCONS_00126829	3407	same	0	V4 longer	3278
sdk1b	ENSDART00000141238	356	XM_017355965.2	837	TCONS_00003366	4111	RefSeq longer	-481	V4 longer	3274
creb3l3a	ENSDART00000138688	777	NM_001020673.1	219	TCONS_00068755	4043	Ens95 longer	558	V4 longer	3266
fut10	ENSDART00000161506	20	XM_005155462.4	167	TCONS_00006052	3432	RefSeq longer	-147	V4 longer	3265
elfn1b	ENSDART00000111131	1057	XM_001920348.5	285	TCONS_00000396	4319	Ens95 longer	772	V4 longer	3262
sox9a	ENSDART00000005676	235	NM_131643.1	235	TCONS_00016531	3496	same	0	V4 longer	3261
zgc:110197	ENSDART00000185614	423	NM_001017827.1	423	TCONS_00021312	3681	same	0	V4 longer	3258
cybrd1	ENSDART00000136599	538	NM_001020500.1	94	TCONS_00124975	3792	Ens95 longer	444	V4 longer	3254
clip2	ENSDART00000148659	517	XM_021476654.1	517	TCONS_00101141	3765	same	0	V4 longer	3248
fkbp1ab	ENSDART00000046784	103	NM_001005594.1	103	TCONS_00072560	3351	same	0	V4 longer	3248
amacr	ENSDART00000080110	241	NM_001020626.1	237	TCONS_00061448	3488	same	4	V4 longer	3247
pigk	ENSDART00000028906	256	NM_001002149.1	256	TCONS_00049877	3502	same	0	V4 longer	3246
col4a1	ENSDART00000077296	1209	XM_688948.9	175	TCONS_00125179	4454	Ens95 longer	1034	V4 longer	3245
slc8a1b	ENSDART00000151929	1214	XM_005158696.4	252	TCONS_00037401	4454	Ens95 longer	962	V4 longer	3240
ppp2r2ca	ENSDART00000017679	679	NM_001037394.1	694	TCONS_00000610	3930	same	-15	V4 longer	3236
syndig1l	ENSDART00000153311	85	XM_005160575.4	3104	TCONS_00058979	6340	RefSeq longer	-3019	V4 longer	3236
kctd5a	ENSDART00000020168	1107	NM_207049.1	1107	TCONS_00086851	4341	same	0	V4 longer	3234
akt3b	ENSDART00000122445	457	XM_001923419.7	213	TCONS_00005179	3678	Ens95 longer	244	V4 longer	3221
BX649384.3	ENSDART00000159421	259	XM_005159776.4	267	TCONS_00046854	3485	same	-8	V4 longer	3218
hipk3b	ENSDART00000142336	241	XM_005159174.4	4676	TCONS_00042326	7878	RefSeq longer	-4435	V4 longer	3202
slc16a1b	ENSDART00000099214	617	NM_200085.1	617	TCONS_00121131	3816	same	0	V4 longer	3199
eral1	ENSDART00000083778	275	NM_001128747.1	254	TCONS_00100404	3468	same	21	V4 longer	3193
dhps	ENSDART00000074068	973	NM_213222.2	443	TCONS_00084948	4165	Ens95 longer	530	V4 longer	3192
eda	ENSDART00000102973	22	XM_021476330.1	666	TCONS_00100036	3850	RefSeq longer	-644	V4 longer	3184
ptpn11b	ENSDART00000046951	1379	XM_005162157.4	1560	TCONS_00070807	4737	RefSeq longer	-181	V4 longer	3177
ccnd2b	ENSDART00000103279	1587	XM_005164521.4	1658	TCONS_00087786	4833	RefSeq longer	-71	V4 longer	3175
si:dkey-206d17.12	ENSDART00000169639	180	NM_001171029.1	180	TCONS_00047312	3352	same	0	V4 longer	3172
msi2b	ENSDART00000100194	1646	NM_201109.1	585	TCONS_00030590	4814	Ens95 longer	1061	V4 longer	3168
zdhhc3a	ENSDART00000017017	736	NM_001002725.1	736	TCONS_00033272	3902	same	0	V4 longer	3166
hecw2b	ENSDART00000166620	647	XM_003197612.5	15	TCONS_00000275	3810	Ens95 longer	632	V4 longer	3163
jarid2a	ENSDART00000086333	473	XM_001345849.7	229	TCONS_00032622	3618	Ens95 longer	244	V4 longer	3145
gpr37a	ENSDART00000112299	381	XM_003201451.5	430	TCONS_00078898	3575	same	-49	V4 longer	3145
si:ch211-264f5.6	ENSDART00000133106	209	XM_002665478.5	2586	TCONS_00047445	5729	RefSeq longer	-2377	V4 longer	3143
rtkn2b	ENSDART00000074845	804	NM_001328566.1	804	TCONS_00063161	3941	same	0	V4 longer	3137
acad9	ENSDART00000083010	369	NM_001045307.1	369	TCONS_00013563	3505	same	0	V4 longer	3136
b4galt3	ENSDART00000089999	424	XM_009296773.3	762	TCONS_00072835	3896	RefSeq longer	-338	V4 longer	3134
chordc1a	ENSDART00000041249	163	NM_001025175.1	150	TCONS_00031307	3296	same	13	V4 longer	3133
si:ch73-14h10.2	ENSDART00000160707	301	NM_131496.2	935	ENSDART00000190509	4068	RefSeq longer	-634	V4 longer	3133
ift81	ENSDART00000004288	1184	NM_001002313.1	685	TCONS_00117489	4311	Ens95 longer	499	V4 longer	3127
myo19	ENSDART00000111453	217	XM_021476376.1	341	TCONS_00101803	3468	RefSeq longer	-124	V4 longer	3127
si:ch211-157p22.10	ENSDART00000112692	1242	NM_001114707.1	1243	TCONS_00105074	4370	same	-1	V4 longer	3127
otomp	ENSDART00000130830	33	NM_001045087.1	33	TCONS_00054401	3159	same	0	V4 longer	3126
bach2b	ENSDART00000131857	1678	XM_005160548.4	1749	TCONS_00058718	4868	RefSeq longer	-71	V4 longer	3119
dab2ipb	ENSDART00000110645	586	NM_001122857.2	586	TCONS_00103403	3703	same	0	V4 longer	3117
zgc:103678	ENSDART00000054879	271	NM_001004662.2	259	TCONS_00000463	3383	same	12	V4 longer	3112
fsd1	ENSDART00000089141	575	NM_001045117.3	559	TCONS_00117758	3685	same	16	V4 longer	3110
cdh26.1	ENSDART00000138290	260	XM_017353725.2	1635	TCONS_00072022	4744	RefSeq longer	-1375	V4 longer	3109
rnf151	ENSDART00000108745	184	XM_001343883.5	612	TCONS_00015034	3720	RefSeq longer	-428	V4 longer	3108
tefb	ENSDART00000169609	1016	NM_001020661.1	1016	TCONS_00084388	4122	same	0	V4 longer	3106
grin3ba	ENSDART00000058111	621	XM_021467383.1	1012	TCONS_00050642	4115	RefSeq longer	-391	V4 longer	3103
mterf2	ENSDART00000111333	1337	NM_001044828.2	1349	TCONS_00043795	4451	same	-12	V4 longer	3102
timm17b	ENSDART00000084417	299	NM_001113593.1	299	TCONS_00121888	3394	same	0	V4 longer	3095
si:ch73-269m14.2	ENSDART00000130880	457	XM_003200909.5	1499	TCONS_00065108	4592	RefSeq longer	-1042	V4 longer	3093
znf512	ENSDART00000147787	520	XM_005160842.4	378	TCONS_00057035	3611	Ens95 longer	142	V4 longer	3091
dvl1b	ENSDART00000103752	27	XM_005169297.4	189	TCONS_00013448	3279	RefSeq longer	-162	V4 longer	3090
gabra2a	ENSDART00000130007	305	XM_009307207.3	881	TCONS_00019063	3969	RefSeq longer	-576	V4 longer	3088
slc1a3b	ENSDART00000063347	11	XM_005169165.4	788	TCONS_00009538	3875	RefSeq longer	-777	V4 longer	3087
acsl4b	ENSDART00000027217	155	NM_001002050.2	317	ENSDART00000191869	3401	RefSeq longer	-162	V4 longer	3084
si:ch211-283g2.1	ENSDART00000132130	776	XM_017356218.2	159	TCONS_00101808	3856	Ens95 longer	617	V4 longer	3080
ephb2a	ENSDART00000148120	3389	XM_021469949.1	1600	TCONS_00072944	6468	Ens95 longer	1789	V4 longer	3079
prpf4ba	ENSDART00000098834	1	XM_017351885.2	1900	TCONS_00053964	4978	RefSeq longer	-1899	V4 longer	3078
asb6	ENSDART00000014915	88	NM_001020576.2	88	TCONS_00119987	3160	same	0	V4 longer	3072
ints6l	ENSDART00000002684	306	NM_200434.1	301	TCONS_00024106	3376	same	5	V4 longer	3070
gpc1a	ENSDART00000125450	13	NM_001037373.1	1154	TCONS_00066382	4216	RefSeq longer	-1141	V4 longer	3062
rab42a	ENSDART00000046530	350	NM_213042.1	339	TCONS_00045769	3411	same	11	V4 longer	3061
mrtfaa	ENSDART00000153507	1227	XM_021473674.1	158	TCONS_00082370	4284	Ens95 longer	1069	V4 longer	3057
mettl25	ENSDART00000067262	752	NM_001045057.1	218	TCONS_00093533	3809	Ens95 longer	534	V4 longer	3057
slc38a9	ENSDART00000041068	169	NM_001079999.1	158	TCONS_00006032	3224	same	11	V4 longer	3055
ttbk1b	ENSDART00000156872	834	XM_017351807.2	428	TCONS_00039809	3888	Ens95 longer	406	V4 longer	3054
tmem163b	ENSDART00000146785	390	XM_002666219.6	446	TCONS_00068328	3498	RefSeq longer	-56	V4 longer	3052
gabpb2b	ENSDART00000135008	460	XM_005158218.4	297	TCONS_00033233	3509	Ens95 longer	163	V4 longer	3049
syt14b	ENSDART00000136079	520	XM_021468458.1	532	TCONS_00058128	3580	same	-12	V4 longer	3048
arl8bb	ENSDART00000103076	472	NM_001326478.1	472	TCONS_00013909	3519	same	0	V4 longer	3047
cdkn1d	ENSDART00000167370	1015	NM_001281477.1	27	TCONS_00128508	4058	Ens95 longer	988	V4 longer	3043
irx3b	ENSDART00000042271	59	NM_213100.1	59	TCONS_00081072	3102	same	0	V4 longer	3043
klf15	ENSDART00000122429	744	NM_212746.3	744	TCONS_00073683	3781	same	0	V4 longer	3037
znf503	ENSDART00000008906	251	NM_198840.3	251	TCONS_00019295	3285	same	0	V4 longer	3034
slc16a12a	ENSDART00000149281	1297	XM_009293052.3	1477	TCONS_00037481	4505	RefSeq longer	-180	V4 longer	3028
p3h4	ENSDART00000169489	226	XM_009294166.3	291	TCONS_00048121	3314	RefSeq longer	-65	V4 longer	3023
rtn2a	ENSDART00000124998	306	NM_001029965.3	306	TCONS_00029452	3329	same	0	V4 longer	3023
zgc:171971	ENSDART00000061633	757	XM_017358477.2	1476	TCONS_00016791	4496	RefSeq longer	-719	V4 longer	3020
ppm1j	ENSDART00000154237	1283	XM_679889.8	1016	TCONS_00110044	4301	Ens95 longer	267	V4 longer	3018
ankrd33ba	ENSDART00000132390	461	XM_691590.8	409	TCONS_00074980	3479	Ens95 longer	52	V4 longer	3018
atad1b	ENSDART00000079130	26	NM_001024421.2	26	TCONS_00015005	3038	same	0	V4 longer	3012
ccdc85a	ENSDART00000057710	915	XM_009307276.3	363	TCONS_00021859	3925	Ens95 longer	552	V4 longer	3010
scp2b	ENSDART00000171885	427	NM_001006093.2	862	TCONS_00071649	3872	RefSeq longer	-435	V4 longer	3010
miox	ENSDART00000140752	408	NM_001030266.1	150	TCONS_00043507	3415	Ens95 longer	258	V4 longer	3007
dusp8a	ENSDART00000024633	1111	XM_005170680.4	1660	TCONS_00080519	4667	RefSeq longer	-549	V4 longer	3007
slc25a6	ENSDART00000026378	341	NM_001128732.1	362	TCONS_00126553	3365	same	-21	V4 longer	3003
abraxas2	ENSDART00000160281	848	XM_009293129.3	1047	TCONS_00040339	4042	RefSeq longer	-199	V4 longer	2995
slc35f1	ENSDART00000074959	466	XM_677843.8	464	TCONS_00059672	3460	same	2	V4 longer	2994
npnt	ENSDART00000018469	423	XM_005160098.4	9	TCONS_00002117	3414	Ens95 longer	414	V4 longer	2991
rab39ba	ENSDART00000019199	370	NM_001098741.1	370	TCONS_00064424	3350	same	0	V4 longer	2980
bbs1	ENSDART00000113061	887	NM_001098251.1	887	TCONS_00061881	3865	same	0	V4 longer	2978
tnfrsf1b	ENSDART00000128442	2411	XM_005155914.4	3170	TCONS_00014116	6147	RefSeq longer	-759	V4 longer	2977
inab	ENSDART00000075260	475	NM_131032.2	475	TCONS_00001284	3448	same	0	V4 longer	2973
emilin1a	ENSDART00000128895	512	XM_005160756.3	499	TCONS_00056840	3481	same	13	V4 longer	2969
add3b	ENSDART00000078703	47	XM_005158673.4	168	TCONS_00039697	3135	RefSeq longer	-121	V4 longer	2967
fsd1l	ENSDART00000143482	230	XM_021476700.1	428	TCONS_00101533	3391	RefSeq longer	-198	V4 longer	2963
zgc:158689	ENSDART00000011166	302	XM_017351372.2	1737	TCONS_00031733	4698	RefSeq longer	-1435	V4 longer	2961
arhgap31	ENSDART00000134386	202	XM_005165631.4	1269	TCONS_00104891	4228	RefSeq longer	-1067	V4 longer	2959
crb2a	ENSDART00000084378	573	NM_001045299.1	573	TCONS_00063084	3526	same	0	V4 longer	2953
bdh1	ENSDART00000147468	111	NM_001089509.1	105	TCONS_00074324	3062	same	6	V4 longer	2951
ppm1ba	ENSDART00000144755	1665	NM_131398.1	247	TCONS_00021239	4615	Ens95 longer	1418	V4 longer	2950
lrtm1	ENSDART00000158259	503	NM_001327807.1	503	TCONS_00122344	3452	same	0	V4 longer	2949
bcap31	ENSDART00000066107	264	NM_200092.1	265	TCONS_00117416	3211	same	-1	V4 longer	2946
ttc38	ENSDART00000061838	151	XM_005159026.4	165	TCONS_00041609	3108	same	-14	V4 longer	2943
slc22a23	ENSDART00000126566	839	NM_001351708.1	1491	TCONS_00052335	4431	RefSeq longer	-652	V4 longer	2940
unc119a	ENSDART00000041707	224	XM_690112.6	413	TCONS_00028058	3347	RefSeq longer	-189	V4 longer	2934
plxna3	ENSDART00000044000	646	NM_001098489.1	387	TCONS_00120093	3571	Ens95 longer	259	V4 longer	2925
bcl11aa	ENSDART00000087426	341	NM_001040391.1	341	TCONS_00019757	3265	same	0	V4 longer	2924
lgi3	ENSDART00000060625	7	NM_001039679.1	7	TCONS_00122217	2931	same	0	V4 longer	2924
cpne4b	ENSDART00000158618	223	XM_003200571.5	859	TCONS_00045863	3769	RefSeq longer	-636	V4 longer	2910
tecpr2	ENSDART00000133668	973	NM_001045179.1	213	TCONS_00040161	3881	Ens95 longer	760	V4 longer	2908
shox	ENSDART00000133996	100	NM_001126411.1	100	TCONS_00124013	3007	same	0	V4 longer	2907
cntf	ENSDART00000147317	370	NM_001145632.1	370	TCONS_00004565	3268	same	0	V4 longer	2898
nol4la	ENSDART00000131934	1009	XM_001922510.7	1206	TCONS_00120944	4104	RefSeq longer	-197	V4 longer	2898
iars	ENSDART00000004423	90	NM_199896.2	90	TCONS_00012366	2987	same	0	V4 longer	2897
ciz1b	ENSDART00000111403	86	NM_213525.1	221	TCONS_00104657	3106	RefSeq longer	-135	V4 longer	2885
extl3	ENSDART00000148892	411	NM_001008402.1	411	TCONS_00060059	3294	same	0	V4 longer	2883
SRCIN1	ENSDART00000148107	4043	XM_021474695.1	774	TCONS_00086468	6923	Ens95 longer	3269	V4 longer	2880
c1galt1b	ENSDART00000077938	554	NM_200051.1	248	TCONS_00109534	3433	Ens95 longer	306	V4 longer	2879
nrbp2b	ENSDART00000128943	71	XM_021470195.1	623	TCONS_00077187	3502	RefSeq longer	-552	V4 longer	2879
wnt1	ENSDART00000077931	196	XM_005162223.4	518	TCONS_00070979	3395	RefSeq longer	-322	V4 longer	2877
cntnap2b	ENSDART00000155125	2282	NM_001302242.1	521	TCONS_00054872	5154	Ens95 longer	1761	V4 longer	2872
si:ch211-194c3.5	ENSDART00000110509	287	NM_001145562.1	287	TCONS_00019130	3158	same	0	V4 longer	2871
wsb2	ENSDART00000133587	271	XM_017356013.2	691	TCONS_00102161	3562	RefSeq longer	-420	V4 longer	2871
vdrb	ENSDART00000150885	329	XM_005166047.4	2978	TCONS_00109511	5848	RefSeq longer	-2649	V4 longer	2870
pias1b	ENSDART00000090310	235	XM_683067.7	229	TCONS_00041985	3103	same	6	V4 longer	2868
nectin1b	ENSDART00000151166	571	NM_001167569.1	571	TCONS_00042905	3438	same	0	V4 longer	2867
cars2	ENSDART00000113735	295	XM_677640.9	156	TCONS_00001174	3154	Ens95 longer	139	V4 longer	2859
unm_sa1614	ENSDART00000103507	1169	XM_005169326.4	1048	TCONS_00011389	4028	Ens95 longer	121	V4 longer	2859
cd40	ENSDART00000137358	224	NM_001145246.1	628	TCONS_00073867	3485	RefSeq longer	-404	V4 longer	2857
tmpob	ENSDART00000030683	681	NM_001020598.1	681	TCONS_00077778	3538	same	0	V4 longer	2857
si:dkey-29b11.3	ENSDART00000145278	77	XM_001346110.6	213	TCONS_00035879	3068	RefSeq longer	-136	V4 longer	2855
si:dkey-95h12.1	ENSDART00000137266	194	XM_001334261.5	805	ENSDART00000058647	3655	RefSeq longer	-611	V4 longer	2850
adcyap1r1b	ENSDART00000156211	820	XM_677888.7	849	TCONS_00109270	3687	same	-29	V4 longer	2838
si:dkey-239i20.4	ENSDART00000063884	1167	NM_001044834.2	1172	TCONS_00058392	4008	same	-5	V4 longer	2836
grb10a	ENSDART00000140665	782	NM_001004287.2	782	TCONS_00048391	3616	same	0	V4 longer	2834
mmp15a	ENSDART00000073679	332	NM_199801.1	21	ENSDART00000189942	3165	Ens95 longer	311	V4 longer	2833
si:dkey-75b17.1	ENSDART00000085645	1069	NM_001146097.1	1069	ENSDART00000192112	3898	same	0	V4 longer	2829
kcnj12b	ENSDART00000141467	1004	XM_001335914.8	1216	TCONS_00081859	4044	RefSeq longer	-212	V4 longer	2828
ugp2a	ENSDART00000010449	62	XM_005155398.4	160	TCONS_00002142	2988	RefSeq longer	-98	V4 longer	2828
adra1aa	ENSDART00000030938	282	NM_001324454.1	282	TCONS_00117233	3107	same	0	V4 longer	2825
zgc:171482	ENSDART00000115089	1108	XM_005157052.4	873	TCONS_00022534	3930	Ens95 longer	235	V4 longer	2822
tspan4b	ENSDART00000103239	362	NM_001082807.1	362	TCONS_00086004	3184	same	0	V4 longer	2822
exoc5	ENSDART00000148786	227	NM_001113796.1	227	TCONS_00040725	3043	same	0	V4 longer	2816
dusp3a	ENSDART00000087204	3101	XM_001340782.8	3158	TCONS_00015557	5970	RefSeq longer	-57	V4 longer	2812
itga3b	ENSDART00000105884	391	NM_001190309.1	391	TCONS_00016743	3203	same	0	V4 longer	2812
mpp5a	ENSDART00000136167	599	XM_009293174.3	604	TCONS_00038120	3415	same	-5	V4 longer	2811
camsap2a	ENSDART00000142947	63	XM_005170467.4	124	TCONS_00068965	2934	RefSeq longer	-61	V4 longer	2810
sfrp1a	ENSDART00000051491	472	NM_205585.1	472	TCONS_00099608	3281	same	0	V4 longer	2809
tecpr1b	ENSDART00000155414	114	XM_002661296.6	421	TCONS_00087451	3227	RefSeq longer	-307	V4 longer	2806
fermt2	ENSDART00000049464	224	XM_005158915.4	4102	TCONS_00038626	6907	RefSeq longer	-3878	V4 longer	2805
VSTM2B	ENSDART00000110590	145	NM_001128778.1	145	TCONS_00115969	2947	same	0	V4 longer	2802
msx2a	ENSDART00000158576	483	NM_001030269.1	483	TCONS_00025711	3280	same	0	V4 longer	2797
lpar3	ENSDART00000159531	500	NM_001285534.1	500	TCONS_00066878	3292	same	0	V4 longer	2792
rab42b	ENSDART00000171608	182	NM_001017683.2	192	TCONS_00033086	2984	same	-10	V4 longer	2792
si:ch73-60h1.1	ENSDART00000109308	446	XM_021479767.1	726	TCONS_00010816	3518	RefSeq longer	-280	V4 longer	2792
peli2	ENSDART00000049503	944	NM_001002616.1	944	TCONS_00038351	3735	same	0	V4 longer	2791
saxo2	ENSDART00000053860	44	NM_001037578.1	44	TCONS_00111017	2835	same	0	V4 longer	2791
vsnl1b	ENSDART00000157125	786	NM_001327942.1	137	TCONS_00039061	3574	Ens95 longer	649	V4 longer	2788
plat	ENSDART00000147275	139	XM_021478352.1	807	TCONS_00119825	3587	RefSeq longer	-668	V4 longer	2780
grpr	ENSDART00000079150	6	XM_690581.7	111	TCONS_00011489	2888	RefSeq longer	-105	V4 longer	2777
adam15	ENSDART00000127753	3806	XM_001335282.7	1146	TCONS_00035213	6580	Ens95 longer	2660	V4 longer	2774
bach1a	ENSDART00000155381	1517	NM_001040313.1	1514	TCONS_00029421	4291	same	3	V4 longer	2774
STX3	ENSDART00000146962	613	NM_001308827.1	613	TCONS_00001845	3378	same	0	V4 longer	2765
si:ch211-10d23.5	ENSDART00000135473	12	XM_002666406.6	146	TCONS_00069903	2910	RefSeq longer	-134	V4 longer	2764
si:ch211-248l17.3	ENSDART00000151970	116	XM_021470402.1	118	TCONS_00077385	2880	same	-2	V4 longer	2762
nr6a1a	ENSDART00000161943	133	XM_017357271.2	5611	TCONS_00122303	8372	RefSeq longer	-5478	V4 longer	2761
fam189a2	ENSDART00000164691	573	XM_009301813.3	580	TCONS_00104239	3334	same	-7	V4 longer	2754
slc15a4	ENSDART00000160503	1004	NM_001320529.1	1030	TCONS_00121495	3781	same	-26	V4 longer	2751
adcy5	ENSDART00000124333	145	NM_001171585.2	145	TCONS_00126641	2885	same	0	V4 longer	2740
kyat1	ENSDART00000138116	137	XM_005171804.4	135	ENSDART00000183838	2873	same	2	V4 longer	2736
bnip3la	ENSDART00000035676	161	NM_001012242.1	161	TCONS_00119954	2896	same	0	V4 longer	2735
zgc:113531	ENSDART00000056657	270	NM_001013486.1	270	TCONS_00051089	3002	same	0	V4 longer	2732
zgc:193790	ENSDART00000158459	129	NM_001128691.1	129	TCONS_00062785	2859	same	0	V4 longer	2730
mbnl1	ENSDART00000074924	303	NM_001100050.2	303	TCONS_00051779	3026	same	0	V4 longer	2723
si:ch73-21k16.5	ENSDART00000132161	305	XM_002665777.6	331	TCONS_00057363	3053	same	-26	V4 longer	2722
cep41	ENSDART00000056180	65	NM_001002194.1	65	TCONS_00078461	2782	same	0	V4 longer	2717
osbpl2b	ENSDART00000010697	657	NM_199872.2	657	TCONS_00070125	3372	same	0	V4 longer	2715
atp8b1	ENSDART00000137844	564	XM_001920475.7	667	TCONS_00062846	3380	RefSeq longer	-103	V4 longer	2713
gfpt2	ENSDART00000076974	45	NM_001033921.1	45	TCONS_00064521	2753	same	0	V4 longer	2708
slc25a22b	ENSDART00000149518	269	XM_009302949.3	536	TCONS_00111028	3244	RefSeq longer	-267	V4 longer	2708
wdr48a	ENSDART00000170688	631	NM_001077795.1	631	TCONS_00077565	3339	same	0	V4 longer	2708
rmc1	ENSDART00000050826	974	XM_017353825.2	274	TCONS_00075377	3681	Ens95 longer	700	V4 longer	2707
si:dkey-16j16.4	ENSDART00000124715	379	XM_002665221.5	345	TCONS_00040588	3086	same	34	V4 longer	2707
zgc:92481	ENSDART00000155256	632	NM_001004604.1	629	TCONS_00077667	3337	same	3	V4 longer	2705
mapre3a	ENSDART00000045287	610	XM_005158846.4	1883	TCONS_00040476	4587	RefSeq longer	-1273	V4 longer	2704
gpcpd1	ENSDART00000027482	21	XM_021468410.1	367	TCONS_00059849	3070	RefSeq longer	-346	V4 longer	2703
abhd2a	ENSDART00000035067	80	NM_200914.1	81	TCONS_00111074	2782	same	-1	V4 longer	2701
tbc1d12b	ENSDART00000109305	632	XM_005169448.4	75	TCONS_00016732	3332	Ens95 longer	557	V4 longer	2700
bmpr2a	ENSDART00000056764	714	XM_005165835.4	2979	TCONS_00108350	5678	RefSeq longer	-2265	V4 longer	2699
grem1b	ENSDART00000163657	1690	XM_021467246.1	1686	TCONS_00038799	4387	same	4	V4 longer	2697
si:dkey-66i24.8	ENSDART00000129564	52	XM_017354779.2	111	TCONS_00082651	2807	RefSeq longer	-59	V4 longer	2696
pcgf5a	ENSDART00000104715	182	XM_017351660.2	790	TCONS_00039869	3485	RefSeq longer	-608	V4 longer	2695
si:dkey-117m1.4	ENSDART00000136990	198	XM_021476794.1	245	TCONS_00004560	2939	same	-47	V4 longer	2694
zgc:113337	ENSDART00000132257	409	NM_001013319.1	409	TCONS_00125208	3095	same	0	V4 longer	2686
gcgrb	ENSDART00000021878	330	XM_009295263.3	176	TCONS_00005360	3011	Ens95 longer	154	V4 longer	2681
ippk	ENSDART00000131217	851	NM_001014324.1	851	TCONS_00068234	3531	same	0	V4 longer	2680
foxo6a	ENSDART00000166776	504	XM_684949.5	2167	TCONS_00034106	4844	RefSeq longer	-1663	V4 longer	2677
lhx2a	ENSDART00000055329	110	XM_017352831.2	462	TCONS_00063078	3138	RefSeq longer	-352	V4 longer	2676
tekt2	ENSDART00000135102	1128	XM_009294043.3	229	TCONS_00047762	3802	Ens95 longer	899	V4 longer	2674
si:dkey-178e17.3	ENSDART00000147408	300	XM_003199037.5	751	TCONS_00119808	3424	RefSeq longer	-451	V4 longer	2673
UBL4A	ENSDART00000013870	251	NM_200300.1	227	TCONS_00119468	2923	same	24	V4 longer	2672
ugcg	ENSDART00000047954	1668	NM_001024207.2	1668	TCONS_00006216	4334	same	0	V4 longer	2666
nt5c1ab	ENSDART00000103830	209	XM_021467469.1	637	TCONS_00040684	3302	RefSeq longer	-428	V4 longer	2665
tcf7	ENSDART00000149156	219	NM_001012389.1	219	TCONS_00062501	2872	same	0	V4 longer	2653
si:ch211-57i17.1	ENSDART00000145294	827	XM_005160865.4	1355	TCONS_00057354	4001	RefSeq longer	-528	V4 longer	2646
p2rx4b	ENSDART00000018475	137	NM_001002081.1	125	ENSDART00000181234	2782	same	12	V4 longer	2645
elmo3	ENSDART00000061738	75	XM_017354204.2	2087	TCONS_00078423	4731	RefSeq longer	-2012	V4 longer	2644
im:7141269	ENSDART00000165872	256	XM_002661876.5	256	TCONS_00097782	2899	same	0	V4 longer	2643
parietopsin	ENSDART00000073811	137	XM_017354106.2	1630	ENSDART00000171010	4272	RefSeq longer	-1493	V4 longer	2642
slc2a8	ENSDART00000166432	272	NM_212798.1	272	TCONS_00101422	2912	same	0	V4 longer	2640
slc25a1b	ENSDART00000109131	1129	NM_001326528.1	1129	TCONS_00008094	3766	same	0	V4 longer	2637
tmem63a	ENSDART00000110497	479	NM_001089378.2	479	TCONS_00093224	3116	same	0	V4 longer	2637
fbxo30b	ENSDART00000013635	77	NM_200432.1	77	TCONS_00072042	2709	same	0	V4 longer	2632
UNC13A	ENSDART00000142748	295	XM_009296285.3	920	TCONS_00066672	3549	RefSeq longer	-625	V4 longer	2629
tead3b	ENSDART00000093199	248	XM_005166141.4	2814	TCONS_00107464	5442	RefSeq longer	-2566	V4 longer	2628
clic5b	ENSDART00000037379	928	NM_001098198.1	389	TCONS_00057235	3553	Ens95 longer	539	V4 longer	2625
rundc3aa	ENSDART00000002393	373	XM_001922232.6	518	TCONS_00085261	3133	RefSeq longer	-145	V4 longer	2615
ago4	ENSDART00000170988	162	NM_001252559.2	14	TCONS_00049408	2772	Ens95 longer	148	V4 longer	2610
tent5c	ENSDART00000139174	467	NM_200507.2	467	TCONS_00123186	3074	same	0	V4 longer	2607
dnajc25	ENSDART00000097359	330	NM_001205027.1	330	TCONS_00101557	2932	same	0	V4 longer	2602
mnx2b	ENSDART00000114035	102	NM_001009887.2	102	TCONS_00003052	2702	same	0	V4 longer	2600
mpp2a	ENSDART00000103161	700	XM_021470936.1	852	TCONS_00082871	3452	RefSeq longer	-152	V4 longer	2600
cdk20	ENSDART00000140098	224	NM_001008655.1	224	TCONS_00120033	2821	same	0	V4 longer	2597
kdr	ENSDART00000049204	1079	NM_001024653.2	1079	TCONS_00056122	3674	same	0	V4 longer	2595
rab11al	ENSDART00000008920	639	NM_200123.1	632	TCONS_00033556	3224	same	7	V4 longer	2585
col8a2	ENSDART00000136811	578	NM_001082901.1	578	TCONS_00049044	3163	same	0	V4 longer	2585
sez6l2	ENSDART00000142594	458	XM_680990.7	390	TCONS_00085003	3040	Ens95 longer	68	V4 longer	2582
stx7l	ENSDART00000100532	1561	XM_003200760.5	960	TCONS_00057291	4140	Ens95 longer	601	V4 longer	2579
exoc3l2b	ENSDART00000157149	347	XM_009291705.3	99	TCONS_00030042	2920	Ens95 longer	248	V4 longer	2573
TC2N	ENSDART00000141451	199	XM_009307433.3	385	TCONS_00022172	2955	RefSeq longer	-186	V4 longer	2570
lrp11	ENSDART00000039616	46	XM_005160320.4	306	TCONS_00055470	2875	RefSeq longer	-260	V4 longer	2569
g6pca.1	ENSDART00000032050	141	XM_017358447.2	1906	TCONS_00016752	4473	RefSeq longer	-1765	V4 longer	2567
prkar1b	ENSDART00000167180	774	XM_021471498.1	943	TCONS_00084935	3508	RefSeq longer	-169	V4 longer	2565
pof1b	ENSDART00000193891	4685	XM_021469233.1	618	TCONS_00064743	7248	Ens95 longer	4067	V4 longer	2563
vsig8b	ENSDART00000138135	138	XM_021478281.1	246	TCONS_00117255	2802	RefSeq longer	-108	V4 longer	2556
arntl1b	ENSDART00000104523	288	XM_005166616.4	335	TCONS_00113607	2888	same	-47	V4 longer	2553
slirp	ENSDART00000155261	207	NM_001305612.1	361	TCONS_00039623	2914	RefSeq longer	-154	V4 longer	2553
slc23a2	ENSDART00000021715	1719	XM_002663198.5	3031	TCONS_00119137	5577	RefSeq longer	-1312	V4 longer	2546
phyhip	ENSDART00000193658	187	NM_001327968.1	187	TCONS_00122282	2731	same	0	V4 longer	2544
crmp1	ENSDART00000064468	432	NM_001020725.1	434	TCONS_00000614	2977	same	-2	V4 longer	2543
dhh	ENSDART00000053871	158	NM_001030115.1	158	TCONS_00070987	2700	same	0	V4 longer	2542
hdac11	ENSDART00000158411	73	XM_021479591.1	2982	TCONS_00011409	5524	RefSeq longer	-2909	V4 longer	2542
cyp27b1	ENSDART00000172882	513	NM_001311791.1	413	TCONS_00010030	3054	Ens95 longer	100	V4 longer	2541
tpd52	ENSDART00000151218	242	XM_005159627.4	369	TCONS_00046359	2908	RefSeq longer	-127	V4 longer	2539
CABZ01073736.1	ENSDART00000159157	505	NM_183349.1	503	TCONS_00045088	3043	same	2	V4 longer	2538
si:ch73-344o19.1	ENSDART00000153307	741	XM_005163253.4	827	TCONS_00049770	3364	RefSeq longer	-86	V4 longer	2537
kcnk3b	ENSDART00000074838	258	XM_694909.8	255	TCONS_00038421	2792	same	3	V4 longer	2534
mlf1	ENSDART00000152466	617	NM_001326373.1	638	TCONS_00027024	3172	same	-21	V4 longer	2534
man2c1	ENSDART00000157029	847	XM_009298093.3	379	TCONS_00078861	3379	Ens95 longer	468	V4 longer	2532
brap	ENSDART00000109148	11	XM_021479154.1	242	TCONS_00005845	2774	RefSeq longer	-231	V4 longer	2532
tmbim1a	ENSDART00000157139	229	NM_001005992.2	229	TCONS_00108375	2759	same	0	V4 longer	2530
si:ch211-102c2.8	ENSDART00000147620	189	XM_001341862.8	761	TCONS_00099534	3288	RefSeq longer	-572	V4 longer	2527
serpinb14	ENSDART00000148894	395	XM_002665065.6	383	TCONS_00036417	2917	same	12	V4 longer	2522
borcs8	ENSDART00000152024	513	XM_005170457.4	152	TCONS_00066512	3034	Ens95 longer	361	V4 longer	2521
akap12a	ENSDART00000155970	1181	XM_005158609.4	1223	TCONS_00036904	3744	same	-42	V4 longer	2521
optc	ENSDART00000003646	362	XM_005172873.4	423	TCONS_00013386	2944	RefSeq longer	-61	V4 longer	2521
apba1a	ENSDART00000168317	3142	XM_001343336.5	386	TCONS_00100913	5661	Ens95 longer	2756	V4 longer	2519
b3gnt7	ENSDART00000056169	830	NM_201294.1	824	TCONS_00067315	3343	same	6	V4 longer	2513
patj	ENSDART00000132829	859	XM_005161703.4	134	TCONS_00068565	3367	Ens95 longer	725	V4 longer	2508
ptprh	ENSDART00000145504	504	XM_017354021.2	1679	TCONS_00074457	4184	RefSeq longer	-1175	V4 longer	2505
tmx4	ENSDART00000168613	1011	NM_001030159.1	1013	TCONS_00036754	3518	same	-2	V4 longer	2505
stk17b	ENSDART00000003482	509	NM_200535.1	494	TCONS_00123497	3011	same	15	V4 longer	2502
smad3b	ENSDART00000043455	748	NM_175083.2	745	TCONS_00041965	3250	same	3	V4 longer	2502
abch1	ENSDART00000135086	283	XM_005158536.4	979	TCONS_00039913	3479	RefSeq longer	-696	V4 longer	2500
syt11b	ENSDART00000078543	163	NM_001162531.1	164	TCONS_00035231	2663	same	-1	V4 longer	2499
tbx18	ENSDART00000103448	452	NM_153665.1	452	TCONS_00071158	2951	same	0	V4 longer	2499
tmcc2	ENSDART00000086434	386	NM_001044919.1	386	TCONS_00067519	2884	same	0	V4 longer	2498
si:ch211-37e10.2	ENSDART00000156419	487	XM_005162533.4	467	TCONS_00074404	2979	same	20	V4 longer	2492
zgc:123321	ENSDART00000058064	90	NM_001037233.1	90	TCONS_00018953	2582	same	0	V4 longer	2492
mrm2	ENSDART00000154052	57	XM_678136.7	59	TCONS_00083399	2549	same	-2	V4 longer	2490
bcl2l1	ENSDART00000012507	963	XM_005162026.4	1285	TCONS_00072742	3773	RefSeq longer	-322	V4 longer	2488
sdc2	ENSDART00000141437	485	NM_173223.2	87	TCONS_00049361	2972	Ens95 longer	398	V4 longer	2487
foxk1	ENSDART00000055201	770	NM_199902.1	453	TCONS_00086724	3255	Ens95 longer	317	V4 longer	2485
pitpnm3	ENSDART00000077582	1385	XM_005157661.4	119	TCONS_00030375	3863	Ens95 longer	1266	V4 longer	2478
sc5d	ENSDART00000065600	267	NM_001004630.1	267	TCONS_00063904	2743	same	0	V4 longer	2476
itpka	ENSDART00000062900	1443	NM_001326476.1	1197	TCONS_00037981	3918	Ens95 longer	246	V4 longer	2475
exosc1	ENSDART00000083633	14	NM_001145567.1	14	TCONS_00005228	2489	same	0	V4 longer	2475
pdk4	ENSDART00000077121	1174	NM_001128704.1	1174	TCONS_00049151	3646	same	0	V4 longer	2472
ppp1r8a	ENSDART00000003164	203	NM_001100952.1	203	TCONS_00045760	2673	same	0	V4 longer	2470
mlycd	ENSDART00000166643	274	NM_001089503.1	279	TCONS_00043748	2747	same	-5	V4 longer	2468
ap1m3	ENSDART00000057732	1239	XM_021476834.1	1274	TCONS_00106640	3739	same	-35	V4 longer	2465
lrrc47	ENSDART00000075129	451	NM_001110372.1	101	TCONS_00117943	2907	Ens95 longer	350	V4 longer	2456
mnx2a	ENSDART00000061716	40	NM_001009886.2	40	TCONS_00122718	2489	same	0	V4 longer	2449
styxl1	ENSDART00000028940	113	NM_001004619.1	113	TCONS_00007302	2562	same	0	V4 longer	2449
trim2b	ENSDART00000113551	805	XM_009306306.3	1185	TCONS_00000418	3631	RefSeq longer	-380	V4 longer	2446
si:dkey-122a22.2	ENSDART00000149154	510	XM_009292612.2	3133	TCONS_00033452	5574	RefSeq longer	-2623	V4 longer	2441
tmem60	ENSDART00000143644	536	NM_001003481.2	592	TCONS_00080455	3033	RefSeq longer	-56	V4 longer	2441
igfbp6b	ENSDART00000128598	572	NM_001161402.2	578	TCONS_00071406	3018	same	-6	V4 longer	2440
zbtb25	ENSDART00000139637	112	XM_017352734.2	157	TCONS_00058973	2596	same	-45	V4 longer	2439
grk4	ENSDART00000159981	5235	XM_009306441.2	320	TCONS_00003397	7668	Ens95 longer	4915	V4 longer	2433
namptb	ENSDART00000037894	329	NM_212668.2	334	TCONS_00013281	2767	same	-5	V4 longer	2433
rbl1	ENSDART00000073865	166	XM_021476946.1	788	TCONS_00110171	3221	RefSeq longer	-622	V4 longer	2433
si:dkey-264d12.4	ENSDART00000052918	141	XM_021479899.1	158	TCONS_00014099	2590	same	-17	V4 longer	2432
gng7	ENSDART00000131834	404	NM_001002397.1	133	TCONS_00054150	2832	Ens95 longer	271	V4 longer	2428
cdc42se2	ENSDART00000142507	1128	NM_001159835.2	1128	TCONS_00005922	3555	same	0	V4 longer	2427
rusc1	ENSDART00000146165	377	XM_005157911.4	1886	TCONS_00032124	4312	RefSeq longer	-1509	V4 longer	2426
crema	ENSDART00000132588	580	XM_677932.9	1909	TCONS_00054525	4328	RefSeq longer	-1329	V4 longer	2419
hic1	ENSDART00000077853	100	NM_001002314.1	100	TCONS_00028008	2517	same	0	V4 longer	2417
lhx2b	ENSDART00000148020	1636	NM_001040010.3	1629	TCONS_00117149	4052	same	7	V4 longer	2416
adck5	ENSDART00000145380	2062	XM_009294096.3	1938	TCONS_00045645	4477	Ens95 longer	124	V4 longer	2415
gpr19	ENSDART00000171845	466	NM_200994.1	468	TCONS_00092791	2883	same	-2	V4 longer	2415
cirbpa	ENSDART00000164102	673	NM_001017797.1	676	TCONS_00052183	3089	same	-3	V4 longer	2413
arsa	ENSDART00000140193	214	NM_001013543.2	214	TCONS_00041499	2622	same	0	V4 longer	2408
pdgfba	ENSDART00000186351	683	XM_009296457.3	1433	TCONS_00069321	3836	RefSeq longer	-750	V4 longer	2403
srek1	ENSDART00000134937	214	NM_001003613.2	322	TCONS_00104353	2724	RefSeq longer	-108	V4 longer	2402
hacl1	ENSDART00000004031	707	NM_213085.1	701	TCONS_00032318	3107	same	6	V4 longer	2400
gpr26	ENSDART00000109031	329	XM_688246.6	723	TCONS_00039783	3122	RefSeq longer	-394	V4 longer	2399
znf423	ENSDART00000142700	866	NM_001080030.1	854	ENSDART00000083296	3264	same	12	V4 longer	2398
znf341	ENSDART00000162062	184	XM_005174532.2	318	TCONS_00071717	2714	RefSeq longer	-134	V4 longer	2396
ptn	ENSDART00000164623	1901	NM_001003981.2	1867	TCONS_00092899	4296	same	34	V4 longer	2395
pigu	ENSDART00000157153	583	XM_017356500.2	980	TCONS_00110122	3374	RefSeq longer	-397	V4 longer	2394
serpinb1l2	ENSDART00000077787	787	NM_001045171.2	293	TCONS_00056417	3178	Ens95 longer	494	V4 longer	2391
fkbp14	ENSDART00000059619	1005	NM_001003471.1	706	TCONS_00032331	3395	Ens95 longer	299	V4 longer	2390
lmbr1l	ENSDART00000027224	625	NM_198874.1	625	TCONS_00070983	3013	same	0	V4 longer	2388
si:ch73-185c24.2	ENSDART00000155827	90	NM_001326582.1	302	TCONS_00106637	2689	RefSeq longer	-212	V4 longer	2387
gtf2h4	ENSDART00000141203	3970	XM_681914.6	1686	TCONS_00048608	6352	Ens95 longer	2284	V4 longer	2382
zfyve9a	ENSDART00000168627	964	XM_001344468.6	980	TCONS_00053100	3361	same	-16	V4 longer	2381
sgce	ENSDART00000111982	360	XM_005159717.4	330	TCONS_00049139	2739	same	30	V4 longer	2379
c7b	ENSDART00000132741	109	XM_005161237.4	109	TCONS_00061512	2478	same	0	V4 longer	2369
sppl3	ENSDART00000038780	1270	NM_001015068.1	417	TCONS_00006455	3633	Ens95 longer	853	V4 longer	2363
faima	ENSDART00000019053	336	NM_001002583.1	336	TCONS_00123415	2699	same	0	V4 longer	2363
si:dkey-239n17.4	ENSDART00000149501	260	XM_001922690.6	270	TCONS_00035233	2631	same	-10	V4 longer	2361
gxylt2	ENSDART00000064878	734	NM_001110200.1	734	TCONS_00107122	3093	same	0	V4 longer	2359
gdnfa	ENSDART00000150096	998	NM_131732.2	574	TCONS_00005721	3352	Ens95 longer	424	V4 longer	2354
actn2b	ENSDART00000133327	1934	NM_001037573.1	116	TCONS_00039673	4287	Ens95 longer	1818	V4 longer	2353
nxpe3	ENSDART00000132836	510	NM_001077381.1	510	TCONS_00123966	2863	same	0	V4 longer	2353
wnt3	ENSDART00000131175	73	NM_001114552.2	62	TCONS_00015260	2422	same	11	V4 longer	2349
uck1	ENSDART00000065880	610	NM_001004666.1	108	TCONS_00062885	2956	Ens95 longer	502	V4 longer	2346
crtc1a	ENSDART00000113356	138	XM_009299205.3	1739	TCONS_00053444	4083	RefSeq longer	-1601	V4 longer	2344
si:dkey-193b15.8	ENSDART00000135624	88	XM_002660854.5	174	TCONS_00051307	2514	RefSeq longer	-86	V4 longer	2340
grin2cb	ENSDART00000153355	884	XM_021480368.1	884	TCONS_00017810	3221	same	0	V4 longer	2337
si:dkey-191g9.5	ENSDART00000078460	173	XM_001921919.6	1671	TCONS_00021598	4001	RefSeq longer	-1498	V4 longer	2330
abl1	ENSDART00000148626	45	XM_005172047.4	831	TCONS_00101614	3157	RefSeq longer	-786	V4 longer	2326
vkorc1	ENSDART00000129427	239	NM_001327932.1	319	TCONS_00016648	2645	RefSeq longer	-80	V4 longer	2326
si:dkey-29d8.3	ENSDART00000131369	334	NM_001110834.1	334	TCONS_00050357	2658	same	0	V4 longer	2324
si:ch211-202h22.7	ENSDART00000141207	117	XM_021477434.1	190	TCONS_00002375	2512	RefSeq longer	-73	V4 longer	2322
tspan4a	ENSDART00000174126	437	XM_009293901.3	1076	TCONS_00043215	3397	RefSeq longer	-639	V4 longer	2321
arhgap19	ENSDART00000133537	472	XM_003201138.5	1748	TCONS_00069441	4068	RefSeq longer	-1276	V4 longer	2320
ldlrad3	ENSDART00000111862	653	NM_001130607.1	653	TCONS_00081125	2973	same	0	V4 longer	2320
lgi1b	ENSDART00000081298	33	XM_005156025.4	375	TCONS_00014636	2694	RefSeq longer	-342	V4 longer	2319
tnfsf11	ENSDART00000098355	647	XM_002663351.6	653	TCONS_00123076	2969	same	-6	V4 longer	2316
si:dkey-38l22.2	ENSDART00000170374	418	XM_021477741.1	2879	TCONS_00114620	5193	RefSeq longer	-2461	V4 longer	2314
fam102ab	ENSDART00000122066	998	NM_001076613.1	1008	TCONS_00103241	3317	same	-10	V4 longer	2309
azin1a	ENSDART00000056101	769	XM_005158442.3	774	TCONS_00036461	3077	same	-5	V4 longer	2303
dhrs12	ENSDART00000041992	612	NM_001076557.1	612	TCONS_00123422	2911	same	0	V4 longer	2299
tbrg1	ENSDART00000129624	199	XM_009293772.3	558	TCONS_00042627	2847	RefSeq longer	-359	V4 longer	2289
ppp2r2cb	ENSDART00000089867	837	XM_021481149.1	1423	TCONS_00025656	3711	RefSeq longer	-586	V4 longer	2288
si:ch211-165b10.3	ENSDART00000154465	66	XM_002660901.5	363	TCONS_00051775	2649	RefSeq longer	-297	V4 longer	2286
kcnj13	ENSDART00000152253	3422	XM_009291899.3	2179	TCONS_00031110	5703	Ens95 longer	1243	V4 longer	2281
f3a	ENSDART00000165993	354	NM_001245967.1	367	TCONS_00075309	2643	same	-13	V4 longer	2276
herc3	ENSDART00000141977	356	NM_001145624.1	356	TCONS_00002129	2632	same	0	V4 longer	2276
ptafr	ENSDART00000154829	66	XM_001342336.5	79	TCONS_00040093	2354	same	-13	V4 longer	2275
tspan12	ENSDART00000048003	481	NM_201152.1	481	TCONS_00093493	2754	same	0	V4 longer	2273
si:ch211-215a10.4	ENSDART00000073704	257	NM_001082846.1	257	TCONS_00046281	2525	same	0	V4 longer	2268
ahr1b	ENSDART00000028787	742	NM_001024816.2	742	TCONS_00068380	3008	same	0	V4 longer	2266
lrrc57	ENSDART00000064515	393	NM_001002627.1	393	TCONS_00037080	2656	same	0	V4 longer	2263
tmem54b	ENSDART00000052086	944	NM_001044716.2	936	TCONS_00046382	3196	same	8	V4 longer	2252
rassf8b	ENSDART00000066895	126	NM_200363.1	135	TCONS_00094248	2387	same	-9	V4 longer	2252
stxbp4	ENSDART00000153245	617	XM_009306797.3	664	TCONS_00015840	2915	same	-47	V4 longer	2251
si:ch211-168b3.1	ENSDART00000147831	794	XM_005163249.4	708	TCONS_00049750	3044	Ens95 longer	86	V4 longer	2250
gabrg1	ENSDART00000171683	708	XM_009307208.3	1419	TCONS_00019066	3669	RefSeq longer	-711	V4 longer	2250
hnrnpua	ENSDART00000020598	3489	XM_005158649.4	2344	TCONS_00039306	5737	Ens95 longer	1145	V4 longer	2248
ebag9	ENSDART00000058546	465	NM_201094.1	458	TCONS_00035842	2710	same	7	V4 longer	2245
pax7b	ENSDART00000129992	649	NM_001146149.1	649	TCONS_00070620	2890	same	0	V4 longer	2241
zgc:113625	ENSDART00000109020	1143	XM_005155413.4	1145	TCONS_00009752	3386	same	-2	V4 longer	2241
sprb	ENSDART00000081432	565	NM_001128790.1	242	TCONS_00117040	2803	Ens95 longer	323	V4 longer	2238
cdk5	ENSDART00000079210	881	NM_131719.1	1857	TCONS_00077217	4095	RefSeq longer	-976	V4 longer	2238
gja5b	ENSDART00000101104	994	NM_001034988.1	994	TCONS_00004943	3231	same	0	V4 longer	2237
ccdc3a	ENSDART00000036153	531	NM_001025510.1	3	TCONS_00093318	2763	Ens95 longer	528	V4 longer	2232
prelid1b	ENSDART00000064846	524	NM_001020679.1	515	TCONS_00071897	2755	same	9	V4 longer	2231
cass4	ENSDART00000023823	461	XM_001341002.5	803	TCONS_00013603	3034	RefSeq longer	-342	V4 longer	2231
eps8l2	ENSDART00000154020	495	XM_002666772.6	392	TCONS_00077859	2722	Ens95 longer	103	V4 longer	2227
zdhhc22	ENSDART00000156195	1430	XM_001340956.5	1408	TCONS_00040733	3657	same	22	V4 longer	2227
zgc:113364	ENSDART00000054088	352	XM_009291030.3	477	TCONS_00025886	2698	RefSeq longer	-125	V4 longer	2221
dpysl2b	ENSDART00000146517	212	XM_005155631.4	3387	TCONS_00006500	5605	RefSeq longer	-3175	V4 longer	2218
CABZ01059119.1	ENSDART00000159983	197	XM_001342341.5	1612	TCONS_00057401	3829	RefSeq longer	-1415	V4 longer	2217
si:ch73-181d5.4	ENSDART00000140749	1640	XM_003201155.5	1639	TCONS_00071977	3856	same	1	V4 longer	2216
nr6a1b	ENSDART00000122773	49	NM_001033720.1	49	TCONS_00060758	2265	same	0	V4 longer	2216
asic1a	ENSDART00000004588	1633	XM_021478320.1	807	TCONS_00117261	3848	Ens95 longer	826	V4 longer	2215
cnsta	ENSDART00000155329	671	XM_692809.7	726	TCONS_00037049	2940	RefSeq longer	-55	V4 longer	2214
zbtb7a	ENSDART00000140187	30	XM_005170529.4	209	TCONS_00068785	2421	RefSeq longer	-179	V4 longer	2212
maco1b	ENSDART00000074567	254	NM_200463.2	251	TCONS_00020553	2460	same	3	V4 longer	2206
eva1ba	ENSDART00000167537	779	XM_005158308.4	319	TCONS_00035709	2984	Ens95 longer	460	V4 longer	2205
mhc1laa	ENSDART00000143807	557	NM_001017904.1	557	TCONS_00119166	2761	same	0	V4 longer	2204
CABZ01071020.1	ENSDART00000115367	199	XM_002665869.5	245	TCONS_00062990	2440	same	-46	V4 longer	2195
gabbr1a	ENSDART00000009892	1	XM_689405.8	1406	TCONS_00030858	3600	RefSeq longer	-1405	V4 longer	2194
si:ch73-144d13.4	ENSDART00000155799	104	XM_001343403.8	102	TCONS_00026932	2297	same	2	V4 longer	2193
faxca	ENSDART00000113864	742	XM_001337905.6	682	TCONS_00093228	2933	Ens95 longer	60	V4 longer	2191
plcxd3	ENSDART00000077053	1321	NM_001014300.1	1310	TCONS_00118734	3511	same	11	V4 longer	2190
mad1l1	ENSDART00000147904	1795	NM_200912.2	365	TCONS_00003269	3980	Ens95 longer	1430	V4 longer	2185
zgc:100846	ENSDART00000015127	841	NM_205603.1	180	TCONS_00019095	3025	Ens95 longer	661	V4 longer	2184
ythdf3	ENSDART00000122294	956	NM_199870.1	956	TCONS_00075032	3139	same	0	V4 longer	2183
pcsk5b	ENSDART00000085304	361	NM_001083829.1	364	TCONS_00121614	2543	same	-3	V4 longer	2179
si:ch211-153f2.3	ENSDART00000165897	119	XM_003200644.5	628	TCONS_00049321	2807	RefSeq longer	-509	V4 longer	2179
mtx1b	ENSDART00000052422	296	NM_001007280.1	288	TCONS_00048492	2469	same	8	V4 longer	2173
kitlga	ENSDART00000113581	562	XM_005163011.4	563	TCONS_00080278	2736	same	-1	V4 longer	2173
usp11	ENSDART00000131963	397	XM_002663073.6	1012	TCONS_00117378	3183	RefSeq longer	-615	V4 longer	2171
prep	ENSDART00000164962	478	NM_001020753.1	484	TCONS_00059983	2654	same	-6	V4 longer	2170
c1galt1a	ENSDART00000053958	275	XM_005162255.4	480	TCONS_00071010	2648	RefSeq longer	-205	V4 longer	2168
zgc:66483	ENSDART00000162867	110	XM_017352750.2	266	TCONS_00062780	2431	RefSeq longer	-156	V4 longer	2165
adam12	ENSDART00000108736	1382	XM_017351825.2	1219	TCONS_00038007	3545	Ens95 longer	163	V4 longer	2163
fgf6a	ENSDART00000016591	582	NM_001001398.2	582	TCONS_00078404	2740	same	0	V4 longer	2158
trabd	ENSDART00000008035	657	XM_021467592.1	3541	TCONS_00043773	5699	RefSeq longer	-2884	V4 longer	2158
kdm7aa	ENSDART00000186258	571	NM_001346151.1	571	TCONS_00094322	2728	same	0	V4 longer	2157
tor3a	ENSDART00000102556	817	NM_001128266.1	817	TCONS_00120457	2974	same	0	V4 longer	2157
bicral	ENSDART00000027379	643	XM_005156379.4	981	TCONS_00017910	3136	RefSeq longer	-338	V4 longer	2155
hspbp1	ENSDART00000162124	669	NM_200075.1	669	TCONS_00081686	2824	same	0	V4 longer	2155
zgc:162964	ENSDART00000032827	25	NM_001089387.1	25	TCONS_00038070	2180	same	0	V4 longer	2155
agxt2	ENSDART00000169024	349	NM_001033750.1	366	TCONS_00060870	2517	same	-17	V4 longer	2151
ctso	ENSDART00000074786	496	XM_021481241.1	557	TCONS_00026443	2708	RefSeq longer	-61	V4 longer	2151
ensaa	ENSDART00000151013	63	XM_005159315.4	79	TCONS_00045007	2226	same	-16	V4 longer	2147
slc17a7b	ENSDART00000154539	127	XM_009297642.3	1866	TCONS_00077460	4013	RefSeq longer	-1739	V4 longer	2147
si:dkeyp-61b2.1	ENSDART00000165394	580	XM_002663826.5	579	TCONS_00014120	2726	same	1	V4 longer	2146
cyp2u1	ENSDART00000048281	14	XM_021474923.1	500	TCONS_00004990	2644	RefSeq longer	-486	V4 longer	2144
pqlc3	ENSDART00000085252	675	NM_001004615.1	665	TCONS_00020192	2816	same	10	V4 longer	2141
cdc42se1	ENSDART00000031895	1546	NM_200060.3	1546	TCONS_00035816	3686	same	0	V4 longer	2140
zgc:110329	ENSDART00000051515	626	NM_001017802.1	617	TCONS_00103020	2763	same	9	V4 longer	2137
smtnl	ENSDART00000043292	494	NM_212805.2	211	TCONS_00027950	2629	Ens95 longer	283	V4 longer	2135
LOC103910001	ENSDART00000189760	637	XM_009298383.3	1215	TCONS_00129647	3348	RefSeq longer	-578	V4 longer	2133
si:dkey-7i4.1	ENSDART00000136137	84	XM_009291376.2	76	TCONS_00026953	2216	same	8	V4 longer	2132
acadvl	ENSDART00000131019	1153	NM_212611.1	236	TCONS_00111411	3284	Ens95 longer	917	V4 longer	2131
zgc:171711	ENSDART00000073978	183	NM_001105527.1	185	TCONS_00087137	2314	same	-2	V4 longer	2129
knop1	ENSDART00000132785	291	XM_682043.8	83	TCONS_00002384	2419	Ens95 longer	208	V4 longer	2128
dnmt3aa	ENSDART00000100320	316	NM_001018134.1	316	TCONS_00059929	2444	same	0	V4 longer	2128
igfbp5a	ENSDART00000057369	969	NM_001098754.1	970	TCONS_00106103	3095	same	-1	V4 longer	2125
sp3a	ENSDART00000001795	538	XM_005167417.4	3501	TCONS_00122575	5623	RefSeq longer	-2963	V4 longer	2122
adm2a	ENSDART00000067193	1131	NM_001130135.1	1131	TCONS_00093488	3251	same	0	V4 longer	2120
rab11a	ENSDART00000060766	2450	NM_001007359.1	1121	TCONS_00041959	4567	Ens95 longer	1329	V4 longer	2117
tmem30aa	ENSDART00000122747	887	NM_212776.2	878	TCONS_00040903	3004	same	9	V4 longer	2117
abcg1	ENSDART00000092809	1138	NM_001110454.1	1138	TCONS_00027140	3254	same	0	V4 longer	2116
znf1010	ENSDART00000156003	18	XM_009291387.3	541	TCONS_00029064	2649	RefSeq longer	-523	V4 longer	2108
gpr84	ENSDART00000136835	485	NM_001105697.1	485	TCONS_00106862	2592	same	0	V4 longer	2107
rd3	ENSDART00000049864	533	NM_001080631.1	705	TCONS_00055857	2809	RefSeq longer	-172	V4 longer	2104
shprh	ENSDART00000157123	580	XM_003200310.5	479	TCONS_00036884	2683	Ens95 longer	101	V4 longer	2103
si:ch211-152p11.4	ENSDART00000114301	704	XM_021468149.1	135	TCONS_00048661	2805	Ens95 longer	569	V4 longer	2101
pygma	ENSDART00000077871	139	NM_001020628.1	135	TCONS_00061891	2240	same	4	V4 longer	2101
nudt4a	ENSDART00000147024	708	NM_001310061.1	676	TCONS_00041750	2808	same	32	V4 longer	2100
rfx4	ENSDART00000031752	703	NM_205712.1	703	TCONS_00043805	2803	same	0	V4 longer	2100
ptger1b	ENSDART00000159282	158	XM_005163745.4	343	TCONS_00081694	2442	RefSeq longer	-185	V4 longer	2099
si:ch211-191i18.2	ENSDART00000150919	1012	XM_021468093.1	1136	TCONS_00049196	3235	RefSeq longer	-124	V4 longer	2099
si:ch73-340m8.2	ENSDART00000058894	47	XM_002665144.6	162	TCONS_00038985	2260	RefSeq longer	-115	V4 longer	2098
zmp:0000001073	ENSDART00000174171	1163	XM_002667444.6	1628	TCONS_00043156	3725	RefSeq longer	-465	V4 longer	2097
rpz	ENSDART00000130264	125	NM_001145238.1	125	TCONS_00033537	2220	same	0	V4 longer	2095
ranbp3a	ENSDART00000139882	345	XM_021479570.1	2939	TCONS_00010374	5033	RefSeq longer	-2594	V4 longer	2094
lypd6b	ENSDART00000135461	860	NM_001128329.1	860	TCONS_00125831	2952	same	0	V4 longer	2092
ihha	ENSDART00000081660	41	NM_001034993.2	41	TCONS_00122706	2130	same	0	V4 longer	2089
zdhhc8b	ENSDART00000129878	1374	NM_178304.3	1368	TCONS_00102357	3457	same	6	V4 longer	2083
tmem182a	ENSDART00000059092	766	NM_001013320.1	766	TCONS_00125108	2844	same	0	V4 longer	2078
ccdc80l1	ENSDART00000040035	880	XM_692493.7	100	TCONS_00105976	2957	Ens95 longer	780	V4 longer	2077
ddx24	ENSDART00000158313	780	XM_003200406.4	659	TCONS_00038755	2853	Ens95 longer	121	V4 longer	2073
gnb5a	ENSDART00000168016	246	NM_001080181.1	246	TCONS_00077889	2309	same	0	V4 longer	2063
si:ch211-130m23.2	ENSDART00000140636	230	NM_001114689.1	230	TCONS_00100762	2286	same	0	V4 longer	2056
unc93a	ENSDART00000142486	69	XM_005170182.3	260	TCONS_00057202	2314	RefSeq longer	-191	V4 longer	2054
apool	ENSDART00000057541	358	NM_001014351.1	356	TCONS_00102619	2409	same	2	V4 longer	2051
casp6	ENSDART00000050930	597	NM_001020497.1	597	TCONS_00086047	2648	same	0	V4 longer	2051
dera	ENSDART00000024312	338	NM_001006097.2	338	TCONS_00093648	2387	same	0	V4 longer	2049
znf1025	ENSDART00000165995	749	XM_021475775.1	1	TCONS_00092166	2796	Ens95 longer	748	V4 longer	2047
sox8b	ENSDART00000055055	709	NM_001025465.1	716	TCONS_00087510	2762	same	-7	V4 longer	2046
tgfbr1a	ENSDART00000121885	174	NM_001037683.2	636	TCONS_00053338	2679	RefSeq longer	-462	V4 longer	2043
lmf2a	ENSDART00000111343	65	NM_001128764.1	65	TCONS_00041414	2107	same	0	V4 longer	2042
irx5b	ENSDART00000036147	1893	NM_001001405.1	77	TCONS_00079335	3934	Ens95 longer	1816	V4 longer	2041
si:ch211-237c6.4	ENSDART00000151311	6	XM_002662282.6	432	TCONS_00105537	2471	RefSeq longer	-426	V4 longer	2039
ythdc1	ENSDART00000073671	379	NM_001007410.1	379	TCONS_00101550	2418	same	0	V4 longer	2039
fam172a	ENSDART00000135954	1708	XM_021476038.1	1840	TCONS_00104129	3878	RefSeq longer	-132	V4 longer	2038
pnkd	ENSDART00000104768	351	NM_001256210.1	351	TCONS_00105872	2388	same	0	V4 longer	2037
kctd9a	ENSDART00000098263	120	NM_001013567.3	120	TCONS_00122239	2155	same	0	V4 longer	2035
ube2j2	ENSDART00000086924	133	NM_001089535.1	133	TCONS_00073826	2168	same	0	V4 longer	2035
itgb1b.1	ENSDART00000148633	40	XM_005171390.4	1306	TCONS_00054542	3339	RefSeq longer	-1266	V4 longer	2033
tm2d2	ENSDART00000051483	168	NM_001002640.1	170	TCONS_00099577	2203	same	-2	V4 longer	2033
zgc:172106	ENSDART00000152464	442	NM_001114563.2	439	TCONS_00002443	2474	same	3	V4 longer	2032
zgc:165582	ENSDART00000154915	884	NM_001102636.1	877	TCONS_00083659	2915	same	7	V4 longer	2031
adpgk2	ENSDART00000091159	2382	XM_689665.8	396	TCONS_00039303	4410	Ens95 longer	1986	V4 longer	2028
tsen54	ENSDART00000053482	18	XM_021470729.1	690	TCONS_00083988	2715	RefSeq longer	-672	V4 longer	2025
efna5b	ENSDART00000160797	631	NM_131026.2	631	TCONS_00117065	2655	same	0	V4 longer	2024
si:dkey-221l4.11	ENSDART00000156672	129	XM_001332989.7	528	TCONS_00037795	2550	RefSeq longer	-399	V4 longer	2022
appbp2	ENSDART00000002824	788	NM_212633.1	786	TCONS_00030248	2809	same	2	V4 longer	2021
sptlc2a	ENSDART00000149494	1189	NM_001020619.1	109	TCONS_00037249	3209	Ens95 longer	1080	V4 longer	2020
npas2	ENSDART00000014806	100	XM_005165120.4	2418	TCONS_00099264	4438	RefSeq longer	-2318	V4 longer	2020
zic1	ENSDART00000127597	667	NM_130933.1	667	TCONS_00075995	2685	same	0	V4 longer	2018
ube4a	ENSDART00000059376	101	XM_003200047.5	1134	TCONS_00030200	3150	RefSeq longer	-1033	V4 longer	2016
slco5a1a	ENSDART00000152026	1197	XM_679609.8	744	TCONS_00074889	3210	Ens95 longer	453	V4 longer	2013
snx21	ENSDART00000091140	119	NM_001077368.2	122	TCONS_00072427	2133	same	-3	V4 longer	2011
asb1	ENSDART00000036369	200	NM_001002736.1	195	TCONS_00124479	2206	same	5	V4 longer	2006
kdf1b	ENSDART00000169343	935	XM_005173776.4	838	TCONS_00045721	2940	Ens95 longer	97	V4 longer	2005
zgc:113348	ENSDART00000158743	245	NM_001013287.1	228	TCONS_00062783	2249	same	17	V4 longer	2004
prdm9	ENSDART00000027321	223	NM_200902.1	223	TCONS_00016945	2226	same	0	V4 longer	2003
camkva	ENSDART00000154333	1448	XM_009302625.3	106	TCONS_00107084	3447	Ens95 longer	1342	V4 longer	1999
mtmr9	ENSDART00000035447	151	XM_005160464.4	806	TCONS_00055998	2805	RefSeq longer	-655	V4 longer	1999
nkx2.4b	ENSDART00000164006	193	NM_131589.1	193	TCONS_00057415	2189	same	0	V4 longer	1996
endou	ENSDART00000064904	112	NM_001080698.1	110	TCONS_00106892	2106	same	2	V4 longer	1994
nbeab	ENSDART00000168920	1418	XM_001920692.5	1430	TCONS_00030742	3424	same	-12	V4 longer	1994
si:ch211-14c7.2	ENSDART00000141278	251	XM_001920354.5	281	TCONS_00044714	2269	same	-30	V4 longer	1988
sparcl2	ENSDART00000156417	66	XM_017351818.2	275	TCONS_00037744	2261	RefSeq longer	-209	V4 longer	1986
syncripl	ENSDART00000154503	596	XM_005158913.4	681	TCONS_00038602	2665	RefSeq longer	-85	V4 longer	1984
nudt19	ENSDART00000173804	1158	NM_001128786.1	25	TCONS_00112543	3140	Ens95 longer	1133	V4 longer	1982
pimr109	ENSDART00000144697	107	NM_001044920.1	107	TCONS_00059754	2086	same	0	V4 longer	1979
pstpip1a	ENSDART00000086190	5	NM_001045216.1	5	TCONS_00044279	1984	same	0	V4 longer	1979
si:dkey-42l23.2	ENSDART00000156874	816	XM_005173403.4	845	TCONS_00031002	2819	same	-29	V4 longer	1974
tmem163a	ENSDART00000113241	212	XM_005167573.4	3011	TCONS_00123390	4983	RefSeq longer	-2799	V4 longer	1972
hyal2a	ENSDART00000083880	448	XM_009302729.3	988	TCONS_00110273	2955	RefSeq longer	-540	V4 longer	1967
si:dkey-6e2.2	ENSDART00000156336	2811	XM_017356722.2	228	TCONS_00110165	4777	Ens95 longer	2583	V4 longer	1966
malt1	ENSDART00000144351	202	XM_005165612.4	182	TCONS_00101445	2166	same	20	V4 longer	1964
ubxn6	ENSDART00000017755	537	NM_001044780.1	537	TCONS_00066816	2501	same	0	V4 longer	1964
bnipl	ENSDART00000085143	215	XM_005158197.4	2326	TCONS_00033227	4289	RefSeq longer	-2111	V4 longer	1963
wdr47a	ENSDART00000142251	220	XM_001922584.7	243	TCONS_00051684	2206	same	-23	V4 longer	1963
si:ch1073-174d20.1	ENSDART00000124331	2534	XM_001333467.7	3107	TCONS_00079392	5068	RefSeq longer	-573	V4 longer	1961
efcc1	ENSDART00000111539	398	XM_002663789.6	762	TCONS_00013560	2720	RefSeq longer	-364	V4 longer	1958
st14b	ENSDART00000087910	169	NM_001077737.1	174	TCONS_00063941	2130	same	-5	V4 longer	1956
slc25a18	ENSDART00000155764	2368	XM_021470661.1	1995	TCONS_00080179	4315	Ens95 longer	373	V4 longer	1947
dnajb6a	ENSDART00000019417	274	NM_001002353.1	274	TCONS_00050819	2218	same	0	V4 longer	1944
bach2a	ENSDART00000156726	5062	XM_680223.9	3345	TCONS_00037182	7005	Ens95 longer	1717	V4 longer	1943
arhgap36	ENSDART00000193947	809	XM_009303441.3	1094	TCONS_00116165	3034	RefSeq longer	-285	V4 longer	1940
prrt4	ENSDART00000126331	194	XM_005159019.4	1045	TCONS_00043641	2983	RefSeq longer	-851	V4 longer	1938
yipf3	ENSDART00000012759	733	NM_199907.1	733	TCONS_00018732	2670	same	0	V4 longer	1937
spire2	ENSDART00000035245	1136	NM_001007342.2	232	TCONS_00079227	3072	Ens95 longer	904	V4 longer	1936
ecscr	ENSDART00000128561	340	XM_002666009.5	388	TCONS_00061918	2324	same	-48	V4 longer	1936
gna13b	ENSDART00000028883	418	NM_001013263.2	418	TCONS_00086397	2354	same	0	V4 longer	1936
bet1	ENSDART00000004514	298	NM_001002046.1	295	TCONS_00049133	2233	same	3	V4 longer	1935
bmp6	ENSDART00000019705	505	XM_021470158.1	550	TCONS_00074462	2484	same	-45	V4 longer	1934
enpp5	ENSDART00000142837	2575	XM_005160463.4	1001	TCONS_00058488	4508	Ens95 longer	1574	V4 longer	1933
fkbp10b	ENSDART00000066367	165	NM_001128666.1	58	TCONS_00014882	2098	Ens95 longer	107	V4 longer	1933
upk3b	ENSDART00000144829	691	NM_001100063.1	691	TCONS_00101133	2624	same	0	V4 longer	1933
ctdp1	ENSDART00000148516	24	NM_001002873.1	24	TCONS_00047843	1954	same	0	V4 longer	1930
sgk2a	ENSDART00000135027	1266	XM_009296592.3	1277	TCONS_00069911	3206	same	-11	V4 longer	1929
scn3b	ENSDART00000149017	244	XM_009291661.2	640	TCONS_00030175	2568	RefSeq longer	-396	V4 longer	1928
ttyh1	ENSDART00000138772	198	XM_021466872.1	486	TCONS_00034394	2414	RefSeq longer	-288	V4 longer	1928
lrrc38b	ENSDART00000122319	997	XM_009306095.3	309	TCONS_00011455	2923	Ens95 longer	688	V4 longer	1926
sv2	ENSDART00000170717	933	XM_009297765.2	169	TCONS_00077947	2858	Ens95 longer	764	V4 longer	1925
si:ch211-106h4.6	ENSDART00000111038	1421	XM_683240.7	409	TCONS_00050969	3343	Ens95 longer	1012	V4 longer	1922
npat	ENSDART00000123143	263	XM_685884.7	264	TCONS_00027998	2186	same	-1	V4 longer	1922
tomm70a	ENSDART00000147285	206	NM_200002.1	197	TCONS_00109035	2127	same	9	V4 longer	1921
slc46a1	ENSDART00000037119	377	NM_200285.1	377	TCONS_00028063	2293	same	0	V4 longer	1916
mknk2b	ENSDART00000016422	1293	NM_194402.1	459	TCONS_00117816	3207	Ens95 longer	834	V4 longer	1914
arl2bp	ENSDART00000127182	778	NM_201001.2	342	TCONS_00043969	2690	Ens95 longer	436	V4 longer	1912
tspan31	ENSDART00000113179	1096	XM_021469763.1	1099	TCONS_00071411	3009	same	-3	V4 longer	1910
bmpr1ab	ENSDART00000166769	1206	NM_001004585.1	1206	TCONS_00017485	3113	same	0	V4 longer	1907
mrtfbb	ENSDART00000157199	2378	XM_009299740.3	3046	TCONS_00083499	4953	RefSeq longer	-668	V4 longer	1907
metap2b	ENSDART00000163647	1536	NM_199640.1	961	TCONS_00077774	3442	Ens95 longer	575	V4 longer	1906
grnb	ENSDART00000105686	523	XM_021470114.1	718	TCONS_00075470	2623	RefSeq longer	-195	V4 longer	1905
maco1a	ENSDART00000009149	443	NM_200319.2	443	TCONS_00046250	2346	same	0	V4 longer	1903
rcor1	ENSDART00000104219	1359	NM_001080041.1	1359	TCONS_00040157	3260	same	0	V4 longer	1901
stk16	ENSDART00000055047	581	NM_001017630.1	581	TCONS_00000220	2476	same	0	V4 longer	1895
pdp1	ENSDART00000111156	389	NM_001111158.1	386	TCONS_00035143	2283	same	3	V4 longer	1894
rcan2	ENSDART00000143379	694	NM_001320228.1	2665	TCONS_00059564	4558	RefSeq longer	-1971	V4 longer	1893
bag2	ENSDART00000049684	118	NM_201000.2	93	TCONS_00020846	2008	same	25	V4 longer	1890
parp8	ENSDART00000083467	1174	NM_001077175.1	1177	TCONS_00103751	3065	same	-3	V4 longer	1888
trappc3	ENSDART00000066712	558	NM_001003601.1	558	TCONS_00049048	2445	same	0	V4 longer	1887
clpxb	ENSDART00000153827	186	XM_002666958.6	660	TCONS_00081006	2546	RefSeq longer	-474	V4 longer	1886
itga1	ENSDART00000145596	77	XM_021479255.1	886	TCONS_00006121	2772	RefSeq longer	-809	V4 longer	1886
syt7a	ENSDART00000154038	126	XM_021470598.1	3438	TCONS_00079667	5324	RefSeq longer	-3312	V4 longer	1886
foxo6b	ENSDART00000131134	1467	NM_001135132.2	1467	TCONS_00045762	3350	same	0	V4 longer	1883
sypl1	ENSDART00000153834	251	XM_002661341.6	1086	TCONS_00087699	2969	RefSeq longer	-835	V4 longer	1883
crfb4	ENSDART00000099479	721	NM_001083868.1	721	TCONS_00125475	2599	same	0	V4 longer	1878
gltpa	ENSDART00000088904	758	NM_001099988.1	758	TCONS_00102426	2636	same	0	V4 longer	1878
dnajc21	ENSDART00000167666	363	NM_200044.1	365	TCONS_00063156	2240	same	-2	V4 longer	1875
si:ch211-285f17.1	ENSDART00000137092	1181	XM_005162585.4	1192	ENSDART00000082422	3066	same	-11	V4 longer	1874
slc35e4	ENSDART00000139868	817	NM_001017857.1	817	TCONS_00008348	2690	same	0	V4 longer	1873
c1ql4b	ENSDART00000067063	996	XM_021477223.1	1009	TCONS_00106888	2877	same	-13	V4 longer	1868
tyr	ENSDART00000122238	257	NM_131013.2	343	TCONS_00028713	2210	RefSeq longer	-86	V4 longer	1867
zgc:77151	ENSDART00000076483	300	NM_205565.2	300	TCONS_00064673	2165	same	0	V4 longer	1865
grwd1	ENSDART00000121998	241	NM_001003509.1	229	TCONS_00032098	2100	same	12	V4 longer	1859
adamts15b	ENSDART00000062378	928	XM_001341842.5	2096	TCONS_00027535	3954	RefSeq longer	-1168	V4 longer	1858
ptges	ENSDART00000026085	448	NM_001014828.2	448	TCONS_00099968	2306	same	0	V4 longer	1858
ptch2	ENSDART00000077304	152	NM_130988.2	152	TCONS_00053983	2009	same	0	V4 longer	1857
rx2	ENSDART00000059003	154	NM_131226.2	154	TCONS_00055079	2011	same	0	V4 longer	1857
arid5a	ENSDART00000115398	268	NM_001327774.1	278	TCONS_00119504	2134	same	-10	V4 longer	1856
btr12	ENSDART00000050357	415	NM_001076619.1	415	TCONS_00113863	2271	same	0	V4 longer	1856
ssbp2	ENSDART00000171494	1137	XM_009305684.3	2227	TCONS_00009862	4083	RefSeq longer	-1090	V4 longer	1856
klhl18	ENSDART00000022909	302	NM_199830.1	44	TCONS_00051024	2157	Ens95 longer	258	V4 longer	1855
mag	ENSDART00000159791	289	XM_021481389.1	1467	TCONS_00030785	3320	RefSeq longer	-1178	V4 longer	1853
dse	ENSDART00000152453	1372	XM_005164424.4	876	TCONS_00055409	3217	Ens95 longer	496	V4 longer	1845
si:dkeyp-41f9.3	ENSDART00000139324	361	XM_017358008.2	366	TCONS_00008426	2210	same	-5	V4 longer	1844
scn1ba	ENSDART00000058611	617	XM_005158211.4	879	TCONS_00033379	2719	RefSeq longer	-262	V4 longer	1840
opn3	ENSDART00000074698	17	NM_001111164.1	17	TCONS_00020482	1856	same	0	V4 longer	1839
caly	ENSDART00000137179	1227	NM_001326550.1	1231	TCONS_00002058	3068	same	-4	V4 longer	1837
chst11	ENSDART00000042963	1227	XM_005168522.4	1571	TCONS_00093381	3408	RefSeq longer	-344	V4 longer	1837
uba7	ENSDART00000155831	124	XM_005155876.4	253	TCONS_00107414	2089	RefSeq longer	-129	V4 longer	1836
dennd1b	ENSDART00000160457	912	XM_009296375.3	831	TCONS_00066835	2747	Ens95 longer	81	V4 longer	1835
zgc:171857	ENSDART00000146941	465	NM_001122628.1	465	TCONS_00072125	2300	same	0	V4 longer	1835
zgc:103508	ENSDART00000171298	1101	NM_001008605.1	1104	TCONS_00006757	2938	same	-3	V4 longer	1834
zgc:162255	ENSDART00000105323	1164	NM_001089477.1	1164	TCONS_00065211	2997	same	0	V4 longer	1833
tmem120b	ENSDART00000063013	708	NM_001045230.2	708	TCONS_00007667	2540	same	0	V4 longer	1832
paqr6	ENSDART00000156851	227	XM_017351556.2	495	TCONS_00033504	2326	RefSeq longer	-268	V4 longer	1831
zgc:114104	ENSDART00000139267	889	NM_001030231.1	889	TCONS_00060905	2719	same	0	V4 longer	1830
CABZ01059120.1	ENSDART00000166857	198	XM_005173815.4	34	TCONS_00059997	2027	Ens95 longer	164	V4 longer	1829
xkr9	ENSDART00000130825	129	NM_001012259.1	129	TCONS_00076325	1957	same	0	V4 longer	1828
tmem136b	ENSDART00000050932	208	NM_001002701.1	208	TCONS_00104549	2034	same	0	V4 longer	1826
zgc:172128	ENSDART00000159789	275	XM_005168116.4	279	ENSDART00000180424	2104	same	-4	V4 longer	1825
taf1b	ENSDART00000062377	1021	XM_021468407.1	1116	TCONS_00059090	2939	RefSeq longer	-95	V4 longer	1823
mfsd6l	ENSDART00000007119	59	NM_001003586.2	54	TCONS_00082408	1881	same	5	V4 longer	1822
vsx2	ENSDART00000030448	520	NM_131462.2	521	TCONS_00040327	2342	same	-1	V4 longer	1821
kcnj11l	ENSDART00000040275	315	NM_001012387.2	315	TCONS_00078026	2135	same	0	V4 longer	1820
six1b	ENSDART00000036124	4363	NM_207095.1	263	TCONS_00056054	6178	Ens95 longer	4100	V4 longer	1815
myrf	ENSDART00000124749	1277	XM_009297723.3	509	TCONS_00079650	3087	Ens95 longer	768	V4 longer	1810
cipca	ENSDART00000153773	437	NM_001327903.1	4	TCONS_00038377	2247	Ens95 longer	433	V4 longer	1810
sirt5	ENSDART00000040793	583	NM_001002605.1	583	TCONS_00058035	2392	same	0	V4 longer	1809
tlcd2	ENSDART00000112079	1729	NM_001110382.1	349	TCONS_00030319	3534	Ens95 longer	1380	V4 longer	1805
ptenb	ENSDART00000079144	1583	NM_001001822.2	766	TCONS_00017197	3388	Ens95 longer	817	V4 longer	1805
cacng6b	ENSDART00000067741	216	XM_001342797.6	252	TCONS_00032069	2053	same	-36	V4 longer	1801
hcst	ENSDART00000147584	269	NM_001100102.2	581	TCONS_00032596	2381	RefSeq longer	-312	V4 longer	1800
ldlrap1b	ENSDART00000058093	514	XM_021480671.1	3084	TCONS_00020560	4882	RefSeq longer	-2570	V4 longer	1798
s1pr2	ENSDART00000053106	789	NM_001159970.1	789	TCONS_00087165	2585	same	0	V4 longer	1796
gsk3aa	ENSDART00000143941	1149	XM_009294003.3	1151	TCONS_00047462	2944	same	-2	V4 longer	1793
zdhhc20a	ENSDART00000077373	625	XM_005172672.4	4576	TCONS_00007341	6369	RefSeq longer	-3951	V4 longer	1793
cdhr5b	ENSDART00000167399	143	XM_017354261.2	941	TCONS_00077880	2732	RefSeq longer	-798	V4 longer	1791
cacna1ha	ENSDART00000154869	1334	XM_009299684.3	604	TCONS_00083328	3116	Ens95 longer	730	V4 longer	1782
si:ch211-225b7.5	ENSDART00000156800	97	XR_117839.5	429	TCONS_00030483	2208	RefSeq longer	-332	V4 longer	1779
si:dkey-14o18.2	ENSDART00000139727	266	XM_689853.8	1290	TCONS_00047670	3066	RefSeq longer	-1024	V4 longer	1776
zgc:113295	ENSDART00000168153	252	XM_021470557.1	154	TCONS_00084026	2024	Ens95 longer	98	V4 longer	1772
ntn2	ENSDART00000154461	946	NM_001037415.1	174	TCONS_00077473	2715	Ens95 longer	772	V4 longer	1769
emx1	ENSDART00000057810	323	NM_198144.2	306	TCONS_00019160	2090	same	17	V4 longer	1767
gnl1	ENSDART00000088513	116	NM_001077253.1	116	TCONS_00034758	1877	same	0	V4 longer	1761
pth1b	ENSDART00000145843	105	NM_212949.2	101	TCONS_00116643	1863	same	4	V4 longer	1758
eogt	ENSDART00000154627	307	XM_021479773.1	1313	TCONS_00013177	3066	RefSeq longer	-1006	V4 longer	1753
slc6a19b	ENSDART00000079248	549	NM_199736.1	549	TCONS_00032271	2299	same	0	V4 longer	1750
fam149b1	ENSDART00000087062	788	XM_005158524.4	1041	TCONS_00040029	2790	RefSeq longer	-253	V4 longer	1749
prr15lb	ENSDART00000134453	667	NM_001017705.1	663	TCONS_00017612	2415	same	4	V4 longer	1748
vps37b	ENSDART00000078642	341	NM_001099996.1	341	TCONS_00103001	2089	same	0	V4 longer	1748
thbs2b	ENSDART00000148562	556	XM_009306791.3	2001	TCONS_00015757	3746	RefSeq longer	-1445	V4 longer	1745
neu3.1	ENSDART00000151759	296	NM_001079665.1	296	TCONS_00061592	2039	same	0	V4 longer	1743
fktn	ENSDART00000082603	821	NM_001042694.2	228	TCONS_00105103	2561	Ens95 longer	593	V4 longer	1740
il23r	ENSDART00000149364	306	XM_021476745.1	295	TCONS_00106680	2043	same	11	V4 longer	1737
wt1a	ENSDART00000031499	466	NM_131046.1	466	TCONS_00080137	2201	same	0	V4 longer	1735
sftpba	ENSDART00000141824	703	XM_001334062.7	158	TCONS_00006077	2427	Ens95 longer	545	V4 longer	1724
hcn3	ENSDART00000039325	246	XM_684105.5	485	TCONS_00045525	2209	RefSeq longer	-239	V4 longer	1724
zdhhc12a	ENSDART00000110482	25	XM_002663052.5	101	TCONS_00119847	1824	RefSeq longer	-76	V4 longer	1723
cnn1b	ENSDART00000170927	111	XM_695946.8	5035	TCONS_00081759	6757	RefSeq longer	-4924	V4 longer	1722
zgc:194887	ENSDART00000171386	43	NM_001128762.1	43	TCONS_00036646	1764	same	0	V4 longer	1721
grid2	ENSDART00000141634	216	NM_001004123.1	216	TCONS_00118606	1936	same	0	V4 longer	1720
si:dkey-166d12.2	ENSDART00000157264	1154	XM_009302680.3	876	TCONS_00110012	2872	Ens95 longer	278	V4 longer	1718
ggt1b	ENSDART00000150213	482	XM_692376.8	330	TCONS_00009800	2200	Ens95 longer	152	V4 longer	1718
zgc:153760	ENSDART00000098041	63	NM_001076618.1	63	TCONS_00016666	1781	same	0	V4 longer	1718
cript	ENSDART00000158036	887	NM_001017893.1	885	TCONS_00017466	2603	same	2	V4 longer	1716
slc6a16b	ENSDART00000170194	516	XM_017353844.2	5043	TCONS_00077465	6757	RefSeq longer	-4527	V4 longer	1714
fgf1b	ENSDART00000062836	1535	NM_001105278.1	1536	TCONS_00062425	3248	same	-1	V4 longer	1712
nr5a2	ENSDART00000166794	2280	NM_001313729.1	2280	TCONS_00068976	3992	same	0	V4 longer	1712
cables1	ENSDART00000162269	211	XM_005163651.4	3409	TCONS_00049698	5120	RefSeq longer	-3198	V4 longer	1711
si:ch211-167b20.8	ENSDART00000156340	737	XM_003199091.5	1565	TCONS_00118269	3276	RefSeq longer	-828	V4 longer	1711
ece1	ENSDART00000136859	901	NM_001077792.1	267	TCONS_00013626	2611	Ens95 longer	634	V4 longer	1710
tmprss13a	ENSDART00000164596	168	NM_001159512.1	308	TCONS_00029560	2018	RefSeq longer	-140	V4 longer	1710
caps2	ENSDART00000081356	184	XM_009293433.3	1395	TCONS_00043549	3102	RefSeq longer	-1211	V4 longer	1707
cds2	ENSDART00000028087	1377	NM_201186.1	1377	TCONS_00099196	3084	same	0	V4 longer	1707
atoh1b	ENSDART00000159069	137	NM_001128679.1	137	TCONS_00129971	1843	same	0	V4 longer	1706
kcnj19a	ENSDART00000083394	194	XM_693159.8	227	TCONS_00083146	1932	same	-33	V4 longer	1705
ogfrl1	ENSDART00000087097	1320	NM_001328046.1	1320	TCONS_00021914	3024	same	0	V4 longer	1704
yars2	ENSDART00000076439	317	NM_001143920.1	441	TCONS_00077720	2145	RefSeq longer	-124	V4 longer	1704
heg1	ENSDART00000140325	1776	NM_212968.2	1456	TCONS_00124219	3478	Ens95 longer	320	V4 longer	1702
si:ch211-43f4.1	ENSDART00000171255	3651	XM_017358194.2	3705	TCONS_00012633	5406	RefSeq longer	-54	V4 longer	1701
myo7aa	ENSDART00000166980	860	XM_021467573.1	1086	TCONS_00043381	2785	RefSeq longer	-226	V4 longer	1699
nxph2b	ENSDART00000165370	433	NM_001326406.1	249	TCONS_00013811	2129	Ens95 longer	184	V4 longer	1696
VSTM2A	ENSDART00000036472	309	NM_001013328.1	309	TCONS_00074246	2005	same	0	V4 longer	1696
dffb	ENSDART00000005989	283	NM_194404.1	133	TCONS_00117939	1978	Ens95 longer	150	V4 longer	1695
sssca1	ENSDART00000100301	181	NM_001006010.1	181	TCONS_00006917	1875	same	0	V4 longer	1694
si:ch211-243o19.4	ENSDART00000091502	69	XM_009307110.3	746	TCONS_00018948	2439	RefSeq longer	-677	V4 longer	1693
tm4sf18	ENSDART00000104527	873	NM_001045022.2	873	TCONS_00067363	2558	same	0	V4 longer	1685
rnf34b	ENSDART00000171484	22	NM_001110035.1	37	TCONS_00007657	1721	same	-15	V4 longer	1684
CABZ01069020.1	ENSDART00000130643	1158	XM_002667438.5	1165	TCONS_00092427	2842	same	-7	V4 longer	1677
cnga1b	ENSDART00000017375	290	XM_695944.9	329	TCONS_00071757	2004	same	-39	V4 longer	1675
desi1b	ENSDART00000121866	574	NM_200208.1	574	TCONS_00017280	2249	same	0	V4 longer	1675
klhl11	ENSDART00000066368	196	NM_199783.1	196	TCONS_00017087	1869	same	0	V4 longer	1673
calcrla	ENSDART00000144353	58	NM_001004010.1	58	TCONS_00126781	1730	same	0	V4 longer	1672
nup155	ENSDART00000137285	96	NM_200156.1	96	TCONS_00007999	1768	same	0	V4 longer	1672
stbd1	ENSDART00000160885	957	XM_005161488.4	666	TCONS_00060606	2627	Ens95 longer	291	V4 longer	1670
rarga	ENSDART00000049551	305	NM_131339.1	305	TCONS_00071338	1974	same	0	V4 longer	1669
adpgk	ENSDART00000143721	1492	XM_005162956.4	829	TCONS_00079574	3160	Ens95 longer	663	V4 longer	1668
si:dkey-261i16.5	ENSDART00000079092	165	XM_005169993.4	346	TCONS_00048715	2012	RefSeq longer	-181	V4 longer	1666
mpeg1.1	ENSDART00000131988	526	NM_212737.1	428	TCONS_00121227	2190	Ens95 longer	98	V4 longer	1664
hcn2b	ENSDART00000136390	509	XM_680322.8	629	TCONS_00066579	2290	RefSeq longer	-120	V4 longer	1661
pip4p1b	ENSDART00000029774	313	NM_001159921.1	313	TCONS_00000450	1974	same	0	V4 longer	1661
hps3	ENSDART00000140968	185	XM_005161859.2	204	TCONS_00069581	1864	same	-19	V4 longer	1660
si:dkey-33c14.6	ENSDART00000111746	214	XM_002660690.5	239	TCONS_00049503	1898	same	-25	V4 longer	1659
crfb16	ENSDART00000099647	732	XM_005163247.4	882	TCONS_00049727	2540	RefSeq longer	-150	V4 longer	1658
pkd2	ENSDART00000020412	205	XM_017353790.2	360	TCONS_00002119	2015	RefSeq longer	-155	V4 longer	1655
scrt2	ENSDART00000053782	1332	NM_213637.1	1336	TCONS_00118579	2990	same	-4	V4 longer	1654
abtb1	ENSDART00000159670	4882	XM_003199051.5	2183	TCONS_00117269	6533	Ens95 longer	2699	V4 longer	1651
pex11b	ENSDART00000100420	144	NM_001045854.2	125	TCONS_00046094	1788	same	19	V4 longer	1644
tm9sf4	ENSDART00000006765	398	NM_200510.2	396	TCONS_00070076	2041	same	2	V4 longer	1643
gnaq	ENSDART00000013229	3	NM_001144799.1	3	TCONS_00104380	1646	same	0	V4 longer	1643
alkbh5	ENSDART00000091683	134	NM_001077387.1	130	TCONS_00000345	1774	same	4	V4 longer	1640
ctgfb	ENSDART00000187670	435	NM_001102573.1	438	TCONS_00047924	2076	same	-3	V4 longer	1638
tpbgl	ENSDART00000187084	599	NM_001252461.2	599	TCONS_00036585	2237	same	0	V4 longer	1638
nat15	ENSDART00000086994	677	NM_001082872.1	675	TCONS_00082520	2314	same	2	V4 longer	1637
atf5a	ENSDART00000098285	321	NM_001128731.1	321	TCONS_00103158	1952	same	0	V4 longer	1631
f2rl1.2	ENSDART00000151543	246	XM_005161489.4	246	TCONS_00063038	1875	same	0	V4 longer	1629
pbx4	ENSDART00000104683	2419	NM_131447.1	872	TCONS_00083696	4046	Ens95 longer	1547	V4 longer	1627
zgc:112023	ENSDART00000157552	889	NM_001017673.1	889	TCONS_00105637	2514	same	0	V4 longer	1625
ofd1	ENSDART00000000552	59	XM_009305014.3	64	TCONS_00124685	1688	same	-5	V4 longer	1624
mrm3a	ENSDART00000147900	40	NM_001017695.2	43	TCONS_00027450	1666	same	-3	V4 longer	1623
pla2g12a	ENSDART00000103406	770	NM_001082799.1	770	TCONS_00003403	2392	same	0	V4 longer	1622
slc25a15b	ENSDART00000136570	1336	XM_005165177.4	1027	TCONS_00099399	2957	Ens95 longer	309	V4 longer	1621
arpin	ENSDART00000100778	304	NM_001017780.1	275	TCONS_00042055	1924	same	29	V4 longer	1620
znrf3	ENSDART00000182148	343	NM_001308555.1	343	TCONS_00099030	1962	same	0	V4 longer	1619
kcnf1a	ENSDART00000153153	1689	XM_021468440.1	181	TCONS_00056714	3306	Ens95 longer	1508	V4 longer	1617
si:rp71-1h20.5	ENSDART00000166003	325	NM_001013559.1	325	TCONS_00062717	1940	same	0	V4 longer	1615
brpf3a	ENSDART00000171935	1323	XM_021479844.1	1396	TCONS_00013507	3007	RefSeq longer	-73	V4 longer	1611
prkn	ENSDART00000029649	51	NM_001017635.1	51	TCONS_00020918	1657	same	0	V4 longer	1606
jph1a	ENSDART00000176316	356	NM_001166256.1	356	TCONS_00076337	1959	same	0	V4 longer	1603
pmm2	ENSDART00000054848	348	NM_200084.1	100	TCONS_00000401	1950	Ens95 longer	248	V4 longer	1602
atp9b	ENSDART00000136294	60	XM_005170057.4	3433	TCONS_00046020	5033	RefSeq longer	-3373	V4 longer	1600
zgc:123238	ENSDART00000078000	64	NM_001037112.1	64	TCONS_00032420	1663	same	0	V4 longer	1599
stum	ENSDART00000132241	807	NM_001030171.1	807	TCONS_00057026	2405	same	0	V4 longer	1598
si:ch211-13f8.1	ENSDART00000142735	614	XM_017352575.2	902	TCONS_00049806	2497	RefSeq longer	-288	V4 longer	1595
cyp4v7	ENSDART00000172985	3046	NM_001079996.1	3046	TCONS_00024018	4638	same	0	V4 longer	1592
vamp8	ENSDART00000031727	1365	NM_199759.1	1365	TCONS_00099639	2955	same	0	V4 longer	1590
pex11g	ENSDART00000160835	348	NM_001030172.1	348	TCONS_00012575	1937	same	0	V4 longer	1589
tmem182b	ENSDART00000129491	261	XM_005165868.4	381	TCONS_00105938	1966	RefSeq longer	-120	V4 longer	1585
map6b	ENSDART00000114267	725	XM_002664611.6	1128	TCONS_00027634	2710	RefSeq longer	-403	V4 longer	1582
colec12	ENSDART00000086863	2245	NM_001122840.1	2245	TCONS_00050946	3822	same	0	V4 longer	1577
stoml3a	ENSDART00000131173	19	NM_001098750.1	20	TCONS_00029220	1597	same	-1	V4 longer	1577
zgc:172120	ENSDART00000100514	435	NM_001128276.1	435	TCONS_00022205	2011	same	0	V4 longer	1576
gatad1	ENSDART00000051712	379	NM_001040364.1	296	TCONS_00046908	1952	Ens95 longer	83	V4 longer	1573
dnaja1	ENSDART00000021336	932	NM_199662.1	929	TCONS_00001885	2503	same	3	V4 longer	1571
edaradd	ENSDART00000089916	981	XM_690046.8	1010	TCONS_00037413	2577	same	-29	V4 longer	1567
slc26a6l	ENSDART00000103833	477	NM_001114417.1	477	TCONS_00106960	2034	same	0	V4 longer	1557
plxnb2a	ENSDART00000143773	1719	XM_009300283.3	165	TCONS_00093804	3273	Ens95 longer	1554	V4 longer	1554
ints7	ENSDART00000124470	1551	XM_021468353.1	184	TCONS_00058288	3105	Ens95 longer	1367	V4 longer	1554
slc47a2.1	ENSDART00000084237	277	NM_001080179.1	270	TCONS_00064814	1829	same	7	V4 longer	1552
trim46b	ENSDART00000151165	233	XM_005159406.4	679	TCONS_00047607	2226	RefSeq longer	-446	V4 longer	1547
tp53inp1	ENSDART00000038294	421	NM_001080036.1	421	TCONS_00033320	1967	same	0	V4 longer	1546
arih1	ENSDART00000019581	692	NM_199758.1	692	TCONS_00041941	2237	same	0	V4 longer	1545
msl2b	ENSDART00000123354	772	NM_001163313.1	772	TCONS_00076964	2316	same	0	V4 longer	1544
rapgef4	ENSDART00000144046	329	XM_009304430.3	1626	TCONS_00124960	3167	RefSeq longer	-1297	V4 longer	1541
sf1	ENSDART00000020212	2118	XM_009303075.2	700	TCONS_00111588	3657	Ens95 longer	1418	V4 longer	1539
nrn1la	ENSDART00000100885	2286	NM_001324501.1	2286	TCONS_00044115	3822	same	0	V4 longer	1536
si:ch211-212d10.1	ENSDART00000183958	3122	XM_005170519.4	274	TCONS_00066551	4654	Ens95 longer	2848	V4 longer	1532
smyd5	ENSDART00000021657	182	NM_001004614.2	184	TCONS_00023784	1715	same	-2	V4 longer	1531
zgc:101016	ENSDART00000051566	1898	NM_001004001.2	1222	TCONS_00102897	3428	Ens95 longer	676	V4 longer	1530
vmo1b	ENSDART00000066621	526	XM_001332828.7	528	TCONS_00062660	2056	same	-2	V4 longer	1528
ptk2ba	ENSDART00000151908	250	XM_005158577.4	308	TCONS_00038999	1835	RefSeq longer	-58	V4 longer	1527
mpp3b	ENSDART00000152409	55	XM_001340154.6	122	TCONS_00014961	1647	RefSeq longer	-67	V4 longer	1525
tor2a	ENSDART00000165556	802	NM_001034180.2	828	TCONS_00104737	2351	same	-26	V4 longer	1523
smyd3	ENSDART00000105236	14	NM_001037400.1	151	TCONS_00039310	1673	RefSeq longer	-137	V4 longer	1522
il4r.2	ENSDART00000167248	647	XM_021474716.1	789	TCONS_00086812	2310	RefSeq longer	-142	V4 longer	1521
tnfrsfa	ENSDART00000124871	209	NM_131840.2	388	TCONS_00063487	1908	RefSeq longer	-179	V4 longer	1520
ppp1r16b	ENSDART00000157066	1991	XM_001340056.7	1991	TCONS_00110421	3506	same	0	V4 longer	1515
WDR31	ENSDART00000141831	35	XM_005165032.4	859	TCONS_00102070	2373	RefSeq longer	-824	V4 longer	1514
nectin3b	ENSDART00000147593	394	NM_001014304.1	394	TCONS_00063694	1907	same	0	V4 longer	1513
si:ch1073-357b18.4	ENSDART00000152304	202	NM_001327995.1	202	TCONS_00016402	1704	same	0	V4 longer	1502
slc4a2b	ENSDART00000149711	781	NM_001114440.1	45	TCONS_00077195	2280	Ens95 longer	736	V4 longer	1499
si:dkeyp-53d3.5	ENSDART00000164685	58	NM_001045012.3	58	TCONS_00065331	1557	same	0	V4 longer	1499
zgc:113411	ENSDART00000186635	413	NM_001017912.2	413	TCONS_00082360	1910	same	0	V4 longer	1497
ano6	ENSDART00000139586	1607	XM_005164462.4	477	TCONS_00092936	3102	Ens95 longer	1130	V4 longer	1495
dusp19a	ENSDART00000059261	277	NM_001128265.1	277	TCONS_00126852	1770	same	0	V4 longer	1493
itpr1a	ENSDART00000149019	556	XM_005166095.4	590	TCONS_00106894	2082	same	-34	V4 longer	1492
rasa3	ENSDART00000092524	307	XM_009305228.3	598	TCONS_00002901	2089	RefSeq longer	-291	V4 longer	1491
ostn	ENSDART00000157190	518	NM_001326409.1	459	TCONS_00030932	2007	Ens95 longer	59	V4 longer	1489
bmpr2b	ENSDART00000125961	19	NM_001039807.1	19	TCONS_00122901	1507	same	0	V4 longer	1488
osbpl7	ENSDART00000020667	827	XM_009306607.3	835	TCONS_00017600	2317	same	-8	V4 longer	1482
cluha	ENSDART00000047471	1465	XM_005157586.4	1465	TCONS_00030306	2941	same	0	V4 longer	1476
eif2b1	ENSDART00000011192	46	XM_009302036.3	46	TCONS_00105092	1522	same	0	V4 longer	1476
cap1	ENSDART00000006344	256	NM_199909.2	256	TCONS_00046875	1730	same	0	V4 longer	1474
zgc:109982	ENSDART00000163445	178	NM_001020543.1	178	TCONS_00108930	1650	same	0	V4 longer	1472
slc39a9	ENSDART00000103397	424	NM_001013540.1	423	TCONS_00038495	1895	same	1	V4 longer	1471
clockb	ENSDART00000133959	395	XM_005168339.4	1439	TCONS_00000793	2908	RefSeq longer	-1044	V4 longer	1469
rps6kb1a	ENSDART00000019050	88	XM_021479379.1	1785	TCONS_00009179	3251	RefSeq longer	-1697	V4 longer	1466
si:ch211-149b19.4	ENSDART00000148989	197	XM_001923015.6	899	TCONS_00071754	2364	RefSeq longer	-702	V4 longer	1465
ghrhrb	ENSDART00000075780	563	XM_021477353.1	388	TCONS_00106604	2021	Ens95 longer	175	V4 longer	1458
yrdc	ENSDART00000060729	875	NM_001083867.1	875	TCONS_00031625	2333	same	0	V4 longer	1458
sun1	ENSDART00000130261	965	NM_001018135.2	965	TCONS_00081656	2422	same	0	V4 longer	1457
trpc2b	ENSDART00000050172	127	NM_001030166.1	127	TCONS_00061980	1582	same	0	V4 longer	1455
zgc:112001	ENSDART00000149283	1135	NM_001017689.2	1135	TCONS_00055373	2586	same	0	V4 longer	1451
myct1b	ENSDART00000131200	208	XM_003200312.5	283	TCONS_00036911	1730	RefSeq longer	-75	V4 longer	1447
si:dkey-261j15.2	ENSDART00000150995	296	NM_001326584.1	297	TCONS_00107915	1743	same	-1	V4 longer	1446
dazap2	ENSDART00000024695	1570	NM_199793.2	1570	TCONS_00071257	3009	same	0	V4 longer	1439
acap3a	ENSDART00000139563	418	XM_021470024.1	418	TCONS_00073831	1856	same	0	V4 longer	1438
syngr3a	ENSDART00000011568	2065	NM_001020591.1	2065	TCONS_00083337	3497	same	0	V4 longer	1432
nudt15	ENSDART00000185999	375	XM_009302185.3	373	TCONS_00108142	1806	same	2	V4 longer	1431
foxred2	ENSDART00000182411	430	NM_001076660.1	433	TCONS_00082421	1862	same	-3	V4 longer	1429
asb13b	ENSDART00000126824	441	XM_005166735.4	254	TCONS_00120137	1866	Ens95 longer	187	V4 longer	1425
cip2a	ENSDART00000081043	138	XM_005162708.4	1029	TCONS_00075068	2451	RefSeq longer	-891	V4 longer	1422
si:ch211-183d21.1	ENSDART00000138264	233	XM_695016.8	90	TCONS_00075543	1650	Ens95 longer	143	V4 longer	1417
dis3l2	ENSDART00000136180	2015	XM_005163248.3	444	TCONS_00049743	3431	Ens95 longer	1571	V4 longer	1416
adcy1a	ENSDART00000100098	37	NM_001168349.1	37	TCONS_00058031	1451	same	0	V4 longer	1414
dhx38	ENSDART00000167562	3529	NM_200876.1	555	TCONS_00113681	4941	Ens95 longer	2974	V4 longer	1412
si:ch73-89b15.3	ENSDART00000075788	100	XM_002661338.6	551	TCONS_00087669	1961	RefSeq longer	-451	V4 longer	1410
b3galt2	ENSDART00000159165	685	NM_207101.1	685	TCONS_00066846	2092	same	0	V4 longer	1407
stx11b.2	ENSDART00000061926	358	NM_001105602.1	358	TCONS_00058909	1765	same	0	V4 longer	1407
ppp2r5b	ENSDART00000077215	1426	XM_021477803.1	1432	TCONS_00111786	2838	same	-6	V4 longer	1406
ptges3b	ENSDART00000128772	411	NM_001002137.2	411	TCONS_00072231	1816	same	0	V4 longer	1405
tk1	ENSDART00000177585	1935	NM_199832.2	1935	TCONS_00012157	3338	same	0	V4 longer	1403
numbl	ENSDART00000171169	454	XM_005173378.4	761	TCONS_00029615	2163	RefSeq longer	-307	V4 longer	1402
mier3a	ENSDART00000123754	657	NM_001030149.2	657	TCONS_00008054	2057	same	0	V4 longer	1400
runx1	ENSDART00000130697	834	XM_021475829.1	1693	TCONS_00002970	3092	RefSeq longer	-859	V4 longer	1399
itih5	ENSDART00000138121	490	XM_001331165.7	541	TCONS_00088866	1937	RefSeq longer	-51	V4 longer	1396
dlg3	ENSDART00000074720	1276	XM_021481213.1	1318	TCONS_00026209	2711	same	-42	V4 longer	1393
tmem185	ENSDART00000065104	1356	NM_200437.1	1356	TCONS_00065010	2748	same	0	V4 longer	1392
bbs4	ENSDART00000092919	1230	NM_001077466.2	766	TCONS_00077738	2621	Ens95 longer	464	V4 longer	1391
pth1rb	ENSDART00000003805	120	NM_131378.1	120	TCONS_00016909	1509	same	0	V4 longer	1389
zgc:110626	ENSDART00000045598	396	NM_001017889.1	208	TCONS_00100759	1784	Ens95 longer	188	V4 longer	1388
lingo4b	ENSDART00000148930	965	XM_005158060.4	1001	TCONS_00035279	2389	same	-36	V4 longer	1388
rhbdd2	ENSDART00000131268	124	XM_001344064.7	399	TCONS_00009491	1787	RefSeq longer	-275	V4 longer	1388
ar	ENSDART00000098022	474	NM_001083123.1	2323	TCONS_00100020	3710	RefSeq longer	-1849	V4 longer	1387
dolk	ENSDART00000112460	53	NM_001110484.1	53	TCONS_00062904	1440	same	0	V4 longer	1387
wnt10b	ENSDART00000059974	137	NM_178219.2	137	TCONS_00073258	1521	same	0	V4 longer	1384
calr3b	ENSDART00000158147	1566	NM_201465.3	1566	TCONS_00055075	2949	same	0	V4 longer	1383
lrrc8da	ENSDART00000167915	2801	XM_002660814.6	549	TCONS_00050407	4182	Ens95 longer	2252	V4 longer	1381
zdhhc23b	ENSDART00000010126	113	NM_001003757.1	108	TCONS_00076568	1493	same	5	V4 longer	1380
ppp1r3ab	ENSDART00000127033	1580	XM_021470690.1	1294	TCONS_00080475	2953	Ens95 longer	286	V4 longer	1373
cnga3a	ENSDART00000149833	374	XM_005166084.3	1392	TCONS_00109493	2761	RefSeq longer	-1018	V4 longer	1369
klf1	ENSDART00000011724	1242	NM_130936.1	1242	TCONS_00105597	2610	same	0	V4 longer	1368
ppfia3	ENSDART00000153562	171	XM_003198113.5	195	TCONS_00085788	1559	same	-24	V4 longer	1364
zgc:154046	ENSDART00000098567	558	NM_001079997.1	558	TCONS_00119195	1919	same	0	V4 longer	1361
klhl41a	ENSDART00000099787	513	XM_001922932.7	1287	TCONS_00126944	2647	RefSeq longer	-774	V4 longer	1360
ppap2d	ENSDART00000102202	393	NM_001079978.1	412	TCONS_00083555	1771	same	-19	V4 longer	1359
slc28a1	ENSDART00000098356	301	NM_001081497.1	304	TCONS_00042267	1662	same	-3	V4 longer	1358
gpr137c	ENSDART00000066604	191	NM_001007433.1	179	TCONS_00037147	1547	same	12	V4 longer	1356
pnx	ENSDART00000030709	221	NM_178302.2	221	TCONS_00005785	1577	same	0	V4 longer	1356
akna	ENSDART00000143874	152	XM_005161116.4	395	TCONS_00063365	1749	RefSeq longer	-243	V4 longer	1354
ncbp3	ENSDART00000065504	340	NM_200143.1	236	TCONS_00064459	1690	Ens95 longer	104	V4 longer	1350
si:dkey-13n15.11	ENSDART00000141573	47	XM_009301436.3	95	TCONS_00099201	1445	same	-48	V4 longer	1350
prph2l	ENSDART00000010584	795	NM_001111194.1	795	TCONS_00058969	2144	same	0	V4 longer	1349
fgf2	ENSDART00000168951	419	NM_212823.2	419	TCONS_00024817	1765	same	0	V4 longer	1346
map3k21	ENSDART00000144282	231	XM_005156926.4	2608	TCONS_00021663	3954	RefSeq longer	-2377	V4 longer	1346
opn8b	ENSDART00000114660	463	XM_021468505.1	2434	TCONS_00057242	3780	RefSeq longer	-1971	V4 longer	1346
edar	ENSDART00000172063	1	NM_001115064.2	1	TCONS_00124732	1346	same	0	V4 longer	1345
steap2	ENSDART00000155295	2085	XM_001921150.5	10	TCONS_00077136	3429	Ens95 longer	2075	V4 longer	1344
si:ch73-59f11.3	ENSDART00000161188	271	NM_001328117.1	271	TCONS_00084493	1611	same	0	V4 longer	1340
sacm1la	ENSDART00000089540	571	NM_001044878.1	21	TCONS_00048597	1908	Ens95 longer	550	V4 longer	1337
rchy1	ENSDART00000003273	107	NM_212600.1	41	TCONS_00098847	1443	Ens95 longer	66	V4 longer	1336
zgc:153383	ENSDART00000163499	174	NM_001045461.1	174	TCONS_00055806	1510	same	0	V4 longer	1336
LOC110437788	ENSDART00000173666	1058	XM_021477807.1	1401	rna24516	2736	RefSeq longer	-343	V4 longer	1335
rnf152	ENSDART00000128193	479	XM_005163633.4	663	TCONS_00050735	1997	RefSeq longer	-184	V4 longer	1334
si:ch211-81a5.1	ENSDART00000091443	262	XM_003200546.5	1994	TCONS_00045489	3320	RefSeq longer	-1732	V4 longer	1326
CABZ01093502.1	ENSDART00000159746	5	XM_021470994.1	705	TCONS_00129416	2027	RefSeq longer	-700	V4 longer	1322
ppp1r11	ENSDART00000052352	559	NM_001017627.1	552	TCONS_00046199	1880	same	7	V4 longer	1321
atp2b2	ENSDART00000158390	1252	NM_001123238.1	1252	TCONS_00012360	2570	same	0	V4 longer	1318
gal3st3	ENSDART00000109485	7645	XM_017356959.2	1232	TCONS_00110821	8961	Ens95 longer	6413	V4 longer	1316
tctn1	ENSDART00000108643	149	XM_009305137.3	193	TCONS_00008399	1508	same	-44	V4 longer	1315
KCTD15	ENSDART00000167894	328	NM_001003527.1	326	TCONS_00129064	1641	same	2	V4 longer	1313
si:ch1073-184j22.2	ENSDART00000152907	1359	XM_001344212.8	1315	TCONS_00052479	2671	same	44	V4 longer	1312
colq	ENSDART00000006037	4431	XM_005157972.4	1685	TCONS_00032325	5739	Ens95 longer	2746	V4 longer	1308
kcnj19b	ENSDART00000090881	563	XM_001340292.7	497	TCONS_00017121	1868	Ens95 longer	66	V4 longer	1305
acsm3	ENSDART00000041806	1828	XM_021478255.1	1830	TCONS_00054633	3133	same	-2	V4 longer	1303
fam161a	ENSDART00000127216	362	XM_021477374.1	530	TCONS_00005175	1833	RefSeq longer	-168	V4 longer	1303
fgf11a	ENSDART00000144375	57	XM_021477520.1	605	TCONS_00111528	1904	RefSeq longer	-548	V4 longer	1299
git2a	ENSDART00000088881	375	XM_005165184.4	948	TCONS_00102429	2247	RefSeq longer	-573	V4 longer	1299
cnot6b	ENSDART00000166463	6539	NM_001110028.1	808	TCONS_00026815	7837	Ens95 longer	5731	V4 longer	1298
si:dkey-10c21.1	ENSDART00000137435	528	XM_001341110.5	45	TCONS_00124397	1826	Ens95 longer	483	V4 longer	1298
fbxo32	ENSDART00000058938	564	NM_200917.1	564	TCONS_00032602	1862	same	0	V4 longer	1298
gcnt7	ENSDART00000154397	1583	XM_005168785.4	1540	TCONS_00110343	2879	same	43	V4 longer	1296
si:ch211-117n7.6	ENSDART00000142629	117	XM_678562.7	806	TCONS_00021221	2101	RefSeq longer	-689	V4 longer	1295
lig4	ENSDART00000085648	305	NM_001103123.1	305	TCONS_00001183	1595	same	0	V4 longer	1290
tmem241	ENSDART00000156808	437	XM_009297608.3	593	TCONS_00077303	1883	RefSeq longer	-156	V4 longer	1290
rnf144ab	ENSDART00000132278	1247	XM_005160676.4	1251	TCONS_00059112	2540	same	-4	V4 longer	1289
tbxtb	ENSDART00000156323	147	XM_001343597.7	869	TCONS_00018767	2154	RefSeq longer	-722	V4 longer	1285
pou1f1	ENSDART00000081878	91	NM_212851.1	91	TCONS_00125574	1375	same	0	V4 longer	1284
cd247l	ENSDART00000140349	394	NM_001100107.1	255	TCONS_00126533	1677	Ens95 longer	139	V4 longer	1283
rflna	ENSDART00000038566	39	NM_001007031.2	39	TCONS_00119156	1321	same	0	V4 longer	1282
si:ch73-57f22.2	ENSDART00000150100	258	XM_001922971.7	651	TCONS_00055367	1933	RefSeq longer	-393	V4 longer	1282
tmod1	ENSDART00000111485	195	XM_001920567.5	1279	TCONS_00000536	2556	RefSeq longer	-1084	V4 longer	1277
wdr74	ENSDART00000089095	273	NM_001076563.1	273	TCONS_00006964	1549	same	0	V4 longer	1276
si:ch1073-287p18.1	ENSDART00000132941	363	NM_001144787.1	363	TCONS_00060146	1637	same	0	V4 longer	1274
cers1	ENSDART00000092647	4375	XM_009295953.3	3647	TCONS_00065846	5648	Ens95 longer	728	V4 longer	1273
chrm4a	ENSDART00000173727	984	XM_001922407.5	1879	TCONS_00115711	3151	RefSeq longer	-895	V4 longer	1272
scel	ENSDART00000075926	471	XM_005167970.4	464	TCONS_00123024	1742	same	7	V4 longer	1271
foxi2	ENSDART00000101673	112	NM_198916.2	112	TCONS_00019124	1382	same	0	V4 longer	1270
mks1	ENSDART00000083134	172	NM_001077373.2	196	TCONS_00104407	1462	same	-24	V4 longer	1266
hsd20b2	ENSDART00000100769	1868	XM_021476561.1	1184	TCONS_00100220	3133	Ens95 longer	684	V4 longer	1265
tespa1	ENSDART00000154969	317	XM_002662524.6	386	TCONS_00107202	1646	RefSeq longer	-69	V4 longer	1260
rbm42	ENSDART00000058380	415	NM_001003850.1	313	TCONS_00036185	1674	Ens95 longer	102	V4 longer	1259
slc6a14	ENSDART00000042220	122	NM_001326450.1	505	TCONS_00013305	1761	RefSeq longer	-383	V4 longer	1256
pacsin1a	ENSDART00000192128	1838	XM_005161905.4	2983	TCONS_00072081	4238	RefSeq longer	-1145	V4 longer	1255
gucy1b1	ENSDART00000129471	120	NM_001251945.2	120	TCONS_00001034	1371	same	0	V4 longer	1251
arl15a	ENSDART00000142157	193	XM_017356149.2	294	TCONS_00100316	1542	RefSeq longer	-101	V4 longer	1248
angpt4	ENSDART00000156256	458	XM_005166270.4	185	TCONS_00107341	1705	Ens95 longer	273	V4 longer	1247
dcaf12	ENSDART00000092015	294	NM_001077580.1	294	TCONS_00060932	1541	same	0	V4 longer	1247
f11r.1	ENSDART00000109660	691	NM_001004667.3	505	TCONS_00099744	1937	Ens95 longer	186	V4 longer	1246
si:dkey-121j17.6	ENSDART00000152149	470	XM_017352708.2	688	TCONS_00055415	1933	RefSeq longer	-218	V4 longer	1245
hapln3	ENSDART00000067323	795	NM_213101.1	795	TCONS_00078511	2038	same	0	V4 longer	1243
hkdc1	ENSDART00000056523	419	NM_001115125.1	419	TCONS_00021640	1662	same	0	V4 longer	1243
zgc:110063	ENSDART00000114873	444	NM_001020737.1	441	TCONS_00098927	1686	same	3	V4 longer	1242
si:ch211-252f13.5	ENSDART00000154490	330	XM_005171187.4	1364	TCONS_00052718	2605	RefSeq longer	-1034	V4 longer	1241
tmem183a	ENSDART00000065996	869	NM_001014295.2	798	TCONS_00013355	2108	Ens95 longer	71	V4 longer	1239
mrps16	ENSDART00000163609	576	NM_001006030.1	578	TCONS_00014153	1817	same	-2	V4 longer	1239
tbc1d19	ENSDART00000025308	207	NM_200491.1	207	TCONS_00113503	1446	same	0	V4 longer	1239
cacna1eb	ENSDART00000134656	245	XM_017351206.2	3198	TCONS_00049525	4433	RefSeq longer	-2953	V4 longer	1235
si:ch73-138e16.2	ENSDART00000169230	5	NM_001100096.1	5	TCONS_00065277	1240	same	0	V4 longer	1235
si:dkey-77f5.8	ENSDART00000157310	256	XM_002664514.6	318	TCONS_00027010	1549	RefSeq longer	-62	V4 longer	1231
bcl9l	ENSDART00000077357	193	XM_005159238.4	719	TCONS_00044649	1948	RefSeq longer	-526	V4 longer	1229
glt1d1	ENSDART00000129357	2	XM_005167246.4	174	TCONS_00118897	1403	RefSeq longer	-172	V4 longer	1229
si:ch73-182a11.2	ENSDART00000156167	1267	XM_689593.7	713	TCONS_00052549	2494	Ens95 longer	554	V4 longer	1227
gjd1a	ENSDART00000193063	30	NM_001128766.1	30	TCONS_00100128	1256	same	0	V4 longer	1226
rap1gap2b	ENSDART00000111571	286	NM_001130656.1	286	TCONS_00064461	1512	same	0	V4 longer	1226
pold3	ENSDART00000101700	39	NM_001042769.2	39	TCONS_00061587	1264	same	0	V4 longer	1225
slc30a1b	ENSDART00000104009	154	NM_001089583.2	154	TCONS_00038162	1379	same	0	V4 longer	1225
ism1	ENSDART00000172138	641	NM_001012376.1	613	TCONS_00022245	1865	same	28	V4 longer	1224
nrg1	ENSDART00000167054	777	XM_005155463.4	973	TCONS_00008267	2195	RefSeq longer	-196	V4 longer	1222
ttc34	ENSDART00000128577	114	XM_679957.8	214	TCONS_00070614	1434	RefSeq longer	-100	V4 longer	1220
si:ch211-241f5.3	ENSDART00000155451	457	XM_009299781.3	689	TCONS_00083675	1908	RefSeq longer	-232	V4 longer	1219
ppp1r3db	ENSDART00000157042	154	XM_003199401.5	175	TCONS_00010067	1393	same	-21	V4 longer	1218
asmt2	ENSDART00000086885	470	NM_001110477.1	470	TCONS_00037770	1687	same	0	V4 longer	1217
pcmtd2	ENSDART00000075918	26	NM_001039921.2	26	TCONS_00073431	1243	same	0	V4 longer	1217
traf3ip1	ENSDART00000007189	228	XM_005172527.4	665	TCONS_00124467	1878	RefSeq longer	-437	V4 longer	1213
cyp1c2	ENSDART00000158830	470	NM_001114849.1	472	TCONS_00036682	1684	same	-2	V4 longer	1212
galca	ENSDART00000053870	574	NM_001005921.1	574	TCONS_00057955	1785	same	0	V4 longer	1211
lhx1b	ENSDART00000021159	419	NM_131207.1	419	TCONS_00101023	1630	same	0	V4 longer	1211
mc5ra	ENSDART00000139909	431	XM_005159581.4	1447	TCONS_00045673	2657	RefSeq longer	-1016	V4 longer	1210
nfat5a	ENSDART00000017805	946	NM_199895.1	946	TCONS_00081084	2155	same	0	V4 longer	1209
slc35a1	ENSDART00000132917	157	NM_001128811.1	72	TCONS_00055523	1364	Ens95 longer	85	V4 longer	1207
zgc:101040	ENSDART00000134177	465	NM_001003588.2	163	TCONS_00044557	1671	Ens95 longer	302	V4 longer	1206
cyp2ad6	ENSDART00000063064	130	XM_021468529.1	234	TCONS_00058809	1440	RefSeq longer	-104	V4 longer	1206
klhl26	ENSDART00000075998	5410	NM_001044853.3	118	TCONS_00010412	6615	Ens95 longer	5292	V4 longer	1205
slc6a19a.2	ENSDART00000121462	172	XM_002665446.6	263	TCONS_00047104	1466	RefSeq longer	-91	V4 longer	1203
slc7a10b	ENSDART00000073398	552	XM_682733.7	448	TCONS_00081053	1754	Ens95 longer	104	V4 longer	1202
st8sia4	ENSDART00000157776	647	NM_001099416.1	647	TCONS_00008180	1848	same	0	V4 longer	1201
nrn1a	ENSDART00000106619	66	NM_001002507.2	53	TCONS_00074297	1266	same	13	V4 longer	1200
olig1	ENSDART00000147795	566	XM_005167653.4	586	TCONS_00126387	1786	same	-20	V4 longer	1200
sod3a	ENSDART00000102756	364	NM_001099236.1	364	TCONS_00113749	1564	same	0	V4 longer	1200
arhgap27	ENSDART00000161076	959	XM_002663903.6	329	TCONS_00014609	2157	Ens95 longer	630	V4 longer	1198
si:ch211-171h4.3	ENSDART00000145319	735	XM_690228.7	1122	TCONS_00047744	2318	RefSeq longer	-387	V4 longer	1196
sts	ENSDART00000146602	281	XM_005168397.4	569	TCONS_00001290	1764	RefSeq longer	-288	V4 longer	1195
nfxl1	ENSDART00000149088	420	XM_002666544.6	128	TCONS_00071763	1614	Ens95 longer	292	V4 longer	1194
tppp2	ENSDART00000036760	298	NM_001326439.1	1204	TCONS_00100135	2395	RefSeq longer	-906	V4 longer	1191
PRLHR	ENSDART00000164163	1396	XM_005169700.4	1440	TCONS_00029531	2627	same	-44	V4 longer	1187
pck2	ENSDART00000024084	1053	NM_213192.1	275	TCONS_00076294	2239	Ens95 longer	778	V4 longer	1186
slc35e3	ENSDART00000066909	211	NM_001030179.1	211	TCONS_00088841	1395	same	0	V4 longer	1184
selplg	ENSDART00000164499	526	NM_001258229.1	527	TCONS_00099166	1708	same	-1	V4 longer	1181
drd4a	ENSDART00000012603	1362	NM_001012616.3	1362	TCONS_00079681	2542	same	0	V4 longer	1180
slc24a4a	ENSDART00000141177	197	XM_005158841.4	315	TCONS_00040553	1490	RefSeq longer	-118	V4 longer	1175
exoc3l2a	ENSDART00000017138	980	XM_678889.7	958	TCONS_00100071	2154	same	22	V4 longer	1174
fam174b	ENSDART00000099476	435	NM_001103135.1	447	TCONS_00042219	1621	same	-12	V4 longer	1174
si:ch211-113d11.6	ENSDART00000173245	490	XM_017359170.2	491	TCONS_00026699	1664	same	-1	V4 longer	1173
aldh4a1	ENSDART00000173103	176	NM_201158.1	182	TCONS_00011996	1352	same	-6	V4 longer	1170
pappaa	ENSDART00000167029	280	NM_001278805.1	280	TCONS_00101575	1449	same	0	V4 longer	1169
tp53i11a	ENSDART00000101053	1210	NM_001013352.2	1210	TCONS_00111886	2378	same	0	V4 longer	1168
rarab	ENSDART00000126022	1380	NM_131399.1	1391	TCONS_00086076	2554	same	-11	V4 longer	1163
golt1a	ENSDART00000125024	13	XM_001336349.5	97	TCONS_00013395	1257	RefSeq longer	-84	V4 longer	1160
si:ch211-93g21.1	ENSDART00000139777	515	XM_003200821.5	255	TCONS_00063003	1674	Ens95 longer	260	V4 longer	1159
akt3a	ENSDART00000164566	1235	NM_001197201.2	931	TCONS_00021268	2393	Ens95 longer	304	V4 longer	1158
si:ch73-269m23.5	ENSDART00000148669	821	XM_001342187.7	823	TCONS_00074072	1981	same	-2	V4 longer	1158
rragd	ENSDART00000027667	1255	NM_001099424.2	1252	TCONS_00037186	2412	same	3	V4 longer	1157
klf8	ENSDART00000085728	786	XM_005170274.4	2515	TCONS_00062173	3672	RefSeq longer	-1729	V4 longer	1157
tpcn3	ENSDART00000114792	107	NM_001177445.2	107	TCONS_00011559	1263	same	0	V4 longer	1156
kctd9b	ENSDART00000005496	340	NM_001002738.1	336	TCONS_00007700	1495	same	4	V4 longer	1155
eva1bb	ENSDART00000159228	1774	NM_001114461.1	1777	TCONS_00045194	2932	same	-3	V4 longer	1155
ctu2	ENSDART00000073555	134	NM_001003560.1	134	TCONS_00113260	1288	same	0	V4 longer	1154
zgc:110006	ENSDART00000049633	30	NM_001020552.1	30	TCONS_00009468	1184	same	0	V4 longer	1154
CABZ01085139.1	ENSDART00000163959	273	NM_207097.1	274	TCONS_00067450	1427	same	-1	V4 longer	1153
aqp10b	ENSDART00000140719	597	NM_001083047.1	597	TCONS_00045434	1748	same	0	V4 longer	1151
gja8b	ENSDART00000007262	1125	NM_131809.2	1125	TCONS_00002024	2276	same	0	V4 longer	1151
plin2	ENSDART00000129407	248	XM_021466287.1	294	TCONS_00027488	1443	same	-46	V4 longer	1149
si:ch211-145o7.3	ENSDART00000145039	73	XM_001923708.6	123	TCONS_00024068	1266	same	-50	V4 longer	1143
ubxn11	ENSDART00000102721	186	XM_692499.6	186	TCONS_00033360	1326	same	0	V4 longer	1140
wisp3	ENSDART00000104806	505	XM_017352531.2	834	TCONS_00057707	1973	RefSeq longer	-329	V4 longer	1139
brd4	ENSDART00000115117	1343	NM_001111281.1	706	TCONS_00083704	2479	Ens95 longer	637	V4 longer	1136
impa1	ENSDART00000010683	181	XM_005163396.4	195	TCONS_00050700	1329	same	-14	V4 longer	1134
zgc:101810	ENSDART00000012637	920	NM_001007772.1	206	TCONS_00114247	2053	Ens95 longer	714	V4 longer	1133
naalad2	ENSDART00000010881	103	XM_009291955.3	111	TCONS_00028717	1244	same	-8	V4 longer	1133
pex6	ENSDART00000145029	243	XM_001332616.8	846	TCONS_00069575	1979	RefSeq longer	-603	V4 longer	1133
march1	ENSDART00000131206	122	XM_021476277.1	1055	TCONS_00000817	2186	RefSeq longer	-933	V4 longer	1131
proza	ENSDART00000140782	1753	NM_001327792.1	1753	TCONS_00087505	2884	same	0	V4 longer	1131
klhl40b	ENSDART00000010488	1	XM_001334040.7	286	TCONS_00074919	1414	RefSeq longer	-285	V4 longer	1128
spata2	ENSDART00000092258	240	XM_005161908.4	1014	TCONS_00069844	2141	RefSeq longer	-774	V4 longer	1127
six1a	ENSDART00000057432	485	XM_021480569.1	1102	TCONS_00022077	2228	RefSeq longer	-617	V4 longer	1126
si:ch211-12e13.12	ENSDART00000139265	209	XM_021476401.1	1099	TCONS_00098853	2224	RefSeq longer	-890	V4 longer	1125
atp6v0b	ENSDART00000147439	1144	NM_199561.2	1141	TCONS_00053980	2268	same	3	V4 longer	1124
znhit2	ENSDART00000050585	43	NM_001077618.1	43	TCONS_00009123	1166	same	0	V4 longer	1123
cdh15	ENSDART00000098453	264	NM_212606.2	338	TCONS_00113275	1456	RefSeq longer	-74	V4 longer	1118
ogdhb	ENSDART00000172621	2697	XM_001338145.7	399	TCONS_00007856	3813	Ens95 longer	2298	V4 longer	1116
znf1113	ENSDART00000150313	501	NM_001328022.1	488	TCONS_00090480	1611	same	13	V4 longer	1110
nars2	ENSDART00000170354	362	XM_021481436.1	193	TCONS_00029478	1471	Ens95 longer	169	V4 longer	1109
zfyve16	ENSDART00000147918	202	XM_001920883.6	206	TCONS_00005816	1314	same	-4	V4 longer	1108
fn3krp	ENSDART00000170955	360	NM_001110108.1	68	TCONS_00083571	1465	Ens95 longer	292	V4 longer	1105
commd6	ENSDART00000139811	45	XM_001332052.5	467	TCONS_00123756	1572	RefSeq longer	-422	V4 longer	1105
ednraa	ENSDART00000010632	1149	XM_021476949.1	1246	TCONS_00001437	2350	RefSeq longer	-97	V4 longer	1104
kptn	ENSDART00000143827	565	NM_001003642.2	223	TCONS_00103530	1668	Ens95 longer	342	V4 longer	1103
r3hdm4	ENSDART00000092270	1092	NM_001080647.1	1092	TCONS_00010296	2194	same	0	V4 longer	1102
csf3a	ENSDART00000161455	63	XM_017358421.2	954	TCONS_00014793	2055	RefSeq longer	-891	V4 longer	1101
parvab	ENSDART00000169182	785	NM_001110471.1	785	TCONS_00113575	1884	same	0	V4 longer	1099
chrnb3a	ENSDART00000074678	482	NM_201220.1	477	TCONS_00003860	1580	same	5	V4 longer	1098
hdr	ENSDART00000005025	317	XM_005171798.4	319	TCONS_00099587	1417	same	-2	V4 longer	1098
elovl2	ENSDART00000066781	2857	NM_001040362.1	348	TCONS_00076167	3953	Ens95 longer	2509	V4 longer	1096
crfb15	ENSDART00000167452	133	XM_021476362.1	382	TCONS_00003325	1478	RefSeq longer	-249	V4 longer	1096
tank	ENSDART00000167034	266	NM_001076600.1	269	TCONS_00127017	1364	same	-3	V4 longer	1095
rnf41l	ENSDART00000135860	430	XM_002664905.6	1288	TCONS_00035132	2379	RefSeq longer	-858	V4 longer	1091
zgc:194621	ENSDART00000112317	264	NM_001135981.1	193	TCONS_00076913	1352	Ens95 longer	71	V4 longer	1088
slc25a29	ENSDART00000083427	787	NM_001030237.1	787	TCONS_00060215	1875	same	0	V4 longer	1088
yipf5	ENSDART00000008593	557	NM_200295.1	557	TCONS_00064891	1643	same	0	V4 longer	1086
ankrd13b	ENSDART00000015286	1693	NM_001030229.2	1000	TCONS_00028085	2778	Ens95 longer	693	V4 longer	1085
tap1	ENSDART00000150156	183	XM_002665007.3	183	TCONS_00033611	1267	same	0	V4 longer	1084
comtb	ENSDART00000033702	1132	NM_001083843.1	1132	TCONS_00011353	2213	same	0	V4 longer	1081
nradd	ENSDART00000022685	49	XM_695893.8	1294	TCONS_00034478	2375	RefSeq longer	-1245	V4 longer	1081
ctbs	ENSDART00000162972	383	NM_001020729.1	385	TCONS_00010877	1464	same	-2	V4 longer	1079
ptgs1	ENSDART00000122863	163	NM_153656.1	163	TCONS_00101386	1242	same	0	V4 longer	1079
mpg	ENSDART00000132587	95	NM_001082850.1	95	TCONS_00083768	1172	same	0	V4 longer	1077
znf1154	ENSDART00000166185	62	XM_003200930.5	534	TCONS_00065406	1611	RefSeq longer	-472	V4 longer	1077
ppm1f	ENSDART00000051666	321	NM_001018155.1	665	TCONS_00102200	1741	RefSeq longer	-344	V4 longer	1076
zgc:194242	ENSDART00000114263	36	XM_021469711.1	561	TCONS_00069969	1637	RefSeq longer	-525	V4 longer	1076
acer1	ENSDART00000136911	593	XM_005166840.4	757	TCONS_00120724	1832	RefSeq longer	-164	V4 longer	1075
ltb4r2b	ENSDART00000076321	542	NM_001308970.2	645	TCONS_00051367	1714	RefSeq longer	-103	V4 longer	1069
cbl	ENSDART00000006085	987	NM_001007330.1	987	TCONS_00027847	2055	same	0	V4 longer	1068
cyb5b	ENSDART00000172015	1169	NM_212876.1	1169	TCONS_00113675	2237	same	0	V4 longer	1068
fdft1	ENSDART00000166508	135	XM_021468511.1	150	TCONS_00060179	1218	same	-15	V4 longer	1068
slc25a16	ENSDART00000079902	676	NM_205549.1	679	TCONS_00021525	1747	same	-3	V4 longer	1068
golga5	ENSDART00000057386	449	NM_213411.2	81	TCONS_00022185	1512	Ens95 longer	368	V4 longer	1063
scn4aa	ENSDART00000170961	69	XM_017358479.2	228	TCONS_00014601	1290	RefSeq longer	-159	V4 longer	1062
rsph3	ENSDART00000128823	595	NM_001089395.2	595	TCONS_00058307	1656	same	0	V4 longer	1061
cnksr1	ENSDART00000050018	89	NM_205659.1	1366	TCONS_00040056	2423	RefSeq longer	-1277	V4 longer	1057
cnrip1b	ENSDART00000054322	368	XM_005156484.4	879	TCONS_00018603	1936	RefSeq longer	-511	V4 longer	1057
zgc:152938	ENSDART00000174219	1081	NM_001077288.1	1081	TCONS_00092399	2138	same	0	V4 longer	1057
trim35-13	ENSDART00000154365	142	XM_689550.8	607	TCONS_00087110	1659	RefSeq longer	-465	V4 longer	1052
ankrd6a	ENSDART00000155711	495	XM_021467384.1	257	TCONS_00039570	1544	Ens95 longer	238	V4 longer	1049
metrnlb	ENSDART00000152229	163	XM_001345259.6	686	TCONS_00002605	1734	RefSeq longer	-523	V4 longer	1048
abhd13	ENSDART00000082260	117	NM_001037685.1	117	TCONS_00125069	1164	same	0	V4 longer	1047
atp1b1b	ENSDART00000139387	1327	NM_131671.1	1315	TCONS_00000468	2372	same	12	V4 longer	1045
gabra1	ENSDART00000166148	564	XM_009295685.3	960	TCONS_00064950	2004	RefSeq longer	-396	V4 longer	1044
magi2a	ENSDART00000009768	2815	NM_001327853.1	2815	TCONS_00094331	3859	same	0	V4 longer	1044
rbm45	ENSDART00000093415	303	XM_005172509.4	307	TCONS_00124888	1351	same	-4	V4 longer	1044
socs4	ENSDART00000124426	544	XM_021467245.1	217	TCONS_00039481	1583	Ens95 longer	327	V4 longer	1039
mpzl1l	ENSDART00000138812	111	XM_005172572.4	3748	TCONS_00005662	4785	RefSeq longer	-3637	V4 longer	1037
p2rx7	ENSDART00000062229	67	NM_198984.2	67	TCONS_00121267	1104	same	0	V4 longer	1037
csgalnact2	ENSDART00000087533	1392	NM_001126397.1	1392	TCONS_00021809	2428	same	0	V4 longer	1036
casp8ap2	ENSDART00000144195	146	NM_001014334.2	146	TCONS_00056208	1181	same	0	V4 longer	1035
dok1b	ENSDART00000172046	492	NM_213088.1	492	TCONS_00113408	1527	same	0	V4 longer	1035
nkx2.1	ENSDART00000017493	605	NM_131776.1	605	TCONS_00038199	1640	same	0	V4 longer	1035
rps6kb1b	ENSDART00000081059	635	NM_213076.1	315	TCONS_00027522	1666	Ens95 longer	320	V4 longer	1031
ednrba	ENSDART00000121758	93	NM_131197.1	93	TCONS_00004202	1123	same	0	V4 longer	1030
pms1	ENSDART00000002053	95	NM_201319.2	95	TCONS_00126726	1125	same	0	V4 longer	1030
commd1	ENSDART00000100788	799	XM_005160149.4	649	TCONS_00005164	1827	Ens95 longer	150	V4 longer	1028
impg1b	ENSDART00000154104	579	XM_009293213.3	443	TCONS_00038155	1607	Ens95 longer	136	V4 longer	1028
adipoqb	ENSDART00000158216	220	NM_001045425.2	220	TCONS_00052398	1248	same	0	V4 longer	1028
ggcta	ENSDART00000113392	174	NM_001144818.1	174	TCONS_00045122	1201	same	0	V4 longer	1027
dph3	ENSDART00000063644	218	NM_001159824.2	470	TCONS_00105951	1496	RefSeq longer	-252	V4 longer	1026
slc17a5	ENSDART00000142922	667	NM_001076727.1	667	TCONS_00019779	1692	same	0	V4 longer	1025
tlr3	ENSDART00000013021	207	NM_001013269.3	207	TCONS_00000743	1232	same	0	V4 longer	1025
ca14	ENSDART00000088276	264	NM_001328144.1	49	TCONS_00031854	1288	Ens95 longer	215	V4 longer	1024
asic4b	ENSDART00000104716	316	NM_214786.1	274	TCONS_00105909	1340	same	42	V4 longer	1024
trim59	ENSDART00000056772	3084	XM_021466296.1	814	TCONS_00029094	4106	Ens95 longer	2270	V4 longer	1022
p2rx3a	ENSDART00000021417	2272	NM_131623.1	396	TCONS_00025681	3294	Ens95 longer	1876	V4 longer	1022
si:ch211-276c2.2	ENSDART00000152376	566	XM_693062.8	662	TCONS_00028627	1684	RefSeq longer	-96	V4 longer	1022
brms1	ENSDART00000121545	2010	NM_200097.1	723	TCONS_00113450	3031	Ens95 longer	1287	V4 longer	1021
gbgt1l3	ENSDART00000051541	134	XM_021476095.1	1035	TCONS_00102716	2055	RefSeq longer	-901	V4 longer	1020
tfr1b	ENSDART00000137851	624	NM_001009918.2	670	TCONS_00075104	1689	same	-46	V4 longer	1019
zgc:114200	ENSDART00000170548	9680	NM_001030129.2	652	TCONS_00006001	10697	Ens95 longer	9028	V4 longer	1017
drc1	ENSDART00000061829	291	XM_021468346.1	623	TCONS_00056712	1640	RefSeq longer	-332	V4 longer	1017
zgc:91849	ENSDART00000159596	1632	NM_001002687.1	1632	TCONS_00124817	2647	same	0	V4 longer	1015
ptk6a	ENSDART00000131632	484	XM_677686.8	306	TCONS_00120941	1496	Ens95 longer	178	V4 longer	1012
lamb1b	ENSDART00000066945	252	NM_001277130.1	252	TCONS_00088921	1264	same	0	V4 longer	1012
chac2	ENSDART00000050831	1029	NM_001029957.1	1029	TCONS_00017441	2040	same	0	V4 longer	1011
lgi2b	ENSDART00000101623	21	NM_001039642.1	21	TCONS_00001572	1032	same	0	V4 longer	1011
mocs1	ENSDART00000111238	1136	XM_009293238.3	4011	TCONS_00038264	5022	RefSeq longer	-2875	V4 longer	1011
sh3gl2a	ENSDART00000090611	629	NM_201116.1	628	TCONS_00004152	1639	same	1	V4 longer	1010
mkrn2os.2	ENSDART00000168157	953	XM_001920173.7	596	TCONS_00010051	1961	Ens95 longer	357	V4 longer	1008
ccdc181	ENSDART00000089161	50	NM_001128540.1	50	TCONS_00117756	1056	same	0	V4 longer	1006
scrt1b	ENSDART00000058829	594	NM_001014347.2	594	TCONS_00035387	1599	same	0	V4 longer	1005
m17	ENSDART00000137503	170	NM_001079833.1	84	TCONS_00103292	1172	Ens95 longer	86	V4 longer	1002
zfpm1	ENSDART00000192075	1013	NM_001039460.2	254	TCONS_00043913	2014	Ens95 longer	759	V4 longer	1001
plekhh2	ENSDART00000144553	1005	XM_021480724.1	511	TCONS_00021091	2004	Ens95 longer	494	V4 longer	999
fam171b	ENSDART00000151717	2311	XM_684648.9	1196	rna21470	3307	Ens95 longer	1115	V4 longer	996
cyp4f3	ENSDART00000063442	157	NM_001089541.1	172	TCONS_00018468	1167	same	-15	V4 longer	995
cdc42ep1b	ENSDART00000150922	129	XM_001346134.6	150	TCONS_00081343	1143	same	-21	V4 longer	993
polr1b	ENSDART00000114741	62	NM_200518.2	62	TCONS_00020475	1055	same	0	V4 longer	993
slc15a1b	ENSDART00000047896	358	NM_198064.1	358	TCONS_00108329	1345	same	0	V4 longer	987
dok7	ENSDART00000135369	713	XM_021476872.1	1095	TCONS_00004598	2081	RefSeq longer	-382	V4 longer	986
tmed1b	ENSDART00000098308	248	NM_001080640.1	258	TCONS_00002762	1243	same	-10	V4 longer	985
mosmob	ENSDART00000052004	828	NM_001076661.1	400	TCONS_00016979	1812	Ens95 longer	428	V4 longer	984
bnip1a	ENSDART00000114169	227	XM_684156.8	323	TCONS_00025732	1306	RefSeq longer	-96	V4 longer	983
kif7	ENSDART00000041577	1615	XM_005166379.4	159	TCONS_00114439	2596	Ens95 longer	1456	V4 longer	981
mettl26	ENSDART00000035531	1229	NM_200116.1	1229	TCONS_00081978	2207	same	0	V4 longer	978
si:ch211-194m7.3	ENSDART00000154862	632	XM_001335347.7	152	TCONS_00078226	1609	Ens95 longer	480	V4 longer	977
dusp4	ENSDART00000065664	540	NM_201171.1	531	TCONS_00063596	1517	same	9	V4 longer	977
si:dkey-243i1.1	ENSDART00000156292	1161	XM_005157662.4	1165	TCONS_00030378	2142	same	-4	V4 longer	977
tshba	ENSDART00000131080	297	XM_021476792.1	326	TCONS_00107255	1303	same	-29	V4 longer	977
si:dkeyp-72g9.4	ENSDART00000114359	751	XM_017352953.2	699	TCONS_00064530	1725	Ens95 longer	52	V4 longer	974
dusp28	ENSDART00000155165	454	XM_001344284.7	952	TCONS_00049723	1926	RefSeq longer	-498	V4 longer	974
si:dkey-27j5.5	ENSDART00000152220	667	XM_001345161.6	486	TCONS_00005418	1639	Ens95 longer	181	V4 longer	972
rac1b	ENSDART00000130877	656	NM_001039818.1	656	TCONS_00083799	1628	same	0	V4 longer	972
rpp25a	ENSDART00000171758	35	NM_001351698.1	35	TCONS_00080753	1007	same	0	V4 longer	972
si:dkey-12e7.1	ENSDART00000100791	440	NM_001044713.2	203	TCONS_00044080	1411	Ens95 longer	237	V4 longer	971
wnt16	ENSDART00000102543	1752	XM_005164667.4	1715	TCONS_00088186	2723	same	37	V4 longer	971
si:ch211-216p19.5	ENSDART00000173472	519	XM_021478143.1	512	TCONS_00111672	1490	same	7	V4 longer	971
si:dkey-171c9.3	ENSDART00000167565	415	XM_021477784.1	415	TCONS_00114814	1386	same	0	V4 longer	971
ube2h	ENSDART00000124452	2087	NM_201489.1	2087	TCONS_00088479	3056	same	0	V4 longer	969
lhx1a	ENSDART00000005641	1000	NM_131216.1	1000	TCONS_00030432	1967	same	0	V4 longer	967
mfsd5	ENSDART00000011004	1251	NM_001002713.1	1251	TCONS_00073719	2218	same	0	V4 longer	967
tbx21	ENSDART00000013980	414	NM_001170599.1	414	TCONS_00015592	1381	same	0	V4 longer	967
tlr22	ENSDART00000184100	80	NM_001128675.2	80	TCONS_00064771	1043	same	0	V4 longer	963
dnm1a	ENSDART00000147972	2591	XM_009301119.3	2518	TCONS_00098643	3553	Ens95 longer	73	V4 longer	962
itgb2	ENSDART00000149704	1141	XM_680920.7	1182	TCONS_00126871	2144	same	-41	V4 longer	962
si:dkey-109j17.5	ENSDART00000162797	1267	XM_002666471.6	1458	TCONS_00070499	2416	RefSeq longer	-191	V4 longer	958
slc26a6	ENSDART00000138882	417	XM_001344207.7	1573	TCONS_00118344	2530	RefSeq longer	-1156	V4 longer	957
myt1a	ENSDART00000135771	403	XM_009296999.3	58	TCONS_00073446	1358	Ens95 longer	345	V4 longer	955
atp8b4	ENSDART00000152787	380	XM_682623.7	949	TCONS_00080875	1904	RefSeq longer	-569	V4 longer	955
mamdc2b	ENSDART00000109231	417	XM_017358018.2	327	TCONS_00008611	1368	Ens95 longer	90	V4 longer	951
st6galnac5b	ENSDART00000063587	849	NM_001006662.2	870	TCONS_00120541	1820	same	-21	V4 longer	950
ankrd37	ENSDART00000103236	438	NM_001145614.1	438	TCONS_00000741	1387	same	0	V4 longer	949
c7a	ENSDART00000146933	481	XM_009304071.3	1871	TCONS_00118735	2819	RefSeq longer	-1390	V4 longer	948
phf8	ENSDART00000183639	1468	NM_001202447.1	1468	TCONS_00073253	2414	same	0	V4 longer	946
zc2hc1c	ENSDART00000153998	392	XM_001339894.7	289	TCONS_00038600	1337	Ens95 longer	103	V4 longer	945
oxct1a	ENSDART00000013434	952	NM_001007291.1	497	TCONS_00118727	1895	Ens95 longer	455	V4 longer	943
gsg1l2b	ENSDART00000066574	331	XM_003199553.5	2495	TCONS_00014429	3436	RefSeq longer	-2164	V4 longer	941
ripor2	ENSDART00000131721	534	XM_005159634.4	601	TCONS_00048850	1542	RefSeq longer	-67	V4 longer	941
mapk11	ENSDART00000160222	957	XM_017354993.2	940	TCONS_00087860	1897	same	17	V4 longer	940
prdm4	ENSDART00000110199	186	NM_001122743.1	186	TCONS_00093827	1125	same	0	V4 longer	939
fam210ab	ENSDART00000058785	541	NM_001013340.1	541	TCONS_00032890	1479	same	0	V4 longer	938
sult1st1	ENSDART00000038924	291	NM_182941.1	292	TCONS_00121973	1230	same	-1	V4 longer	938
kif25	ENSDART00000022951	415	XM_681410.5	448	TCONS_00059134	1385	same	-33	V4 longer	937
lemd3	ENSDART00000013604	385	NM_001044864.1	385	TCONS_00093686	1321	same	0	V4 longer	936
wnt8b	ENSDART00000049624	2563	NM_130959.2	60	TCONS_00021973	3497	Ens95 longer	2503	V4 longer	934
ppm1h	ENSDART00000093277	436	NM_001077455.1	436	TCONS_00077703	1370	same	0	V4 longer	934
prepl	ENSDART00000008603	151	NM_001145616.1	23	TCONS_00019008	1083	Ens95 longer	128	V4 longer	932
efhc2	ENSDART00000142788	1344	NM_001309817.1	94	TCONS_00126481	2275	Ens95 longer	1250	V4 longer	931
itgb7	ENSDART00000065057	173	XM_021477222.1	771	TCONS_00109612	1702	RefSeq longer	-598	V4 longer	931
gtf2f2b	ENSDART00000006514	186	NM_001017832.1	186	TCONS_00123093	1115	same	0	V4 longer	929
zgc:73226	ENSDART00000031775	1681	NM_205570.2	1697	TCONS_00101896	2624	same	-16	V4 longer	927
arvcfa	ENSDART00000145220	510	XM_695909.8	631	TCONS_00005687	1548	RefSeq longer	-121	V4 longer	917
p4ha1a	ENSDART00000127952	488	XM_009306502.3	618	TCONS_00014743	1535	RefSeq longer	-130	V4 longer	917
pex16	ENSDART00000081025	352	NM_001025169.1	352	TCONS_00044690	1269	same	0	V4 longer	917
them6	ENSDART00000168286	398	NM_001122704.1	309	TCONS_00054895	1313	Ens95 longer	89	V4 longer	915
ftr85	ENSDART00000136448	85	XM_693013.8	246	TCONS_00055685	1159	RefSeq longer	-161	V4 longer	913
il21r.1	ENSDART00000154796	553	XM_005164216.3	556	TCONS_00086859	1468	same	-3	V4 longer	912
znf1059	ENSDART00000110358	1376	NM_001128249.2	1376	TCONS_00089088	2287	same	0	V4 longer	911
noa1	ENSDART00000163856	916	NM_001114428.1	916	TCONS_00024742	1826	same	0	V4 longer	910
stpg1	ENSDART00000162883	1032	NM_001346266.1	1032	TCONS_00047363	1941	same	0	V4 longer	909
ndufaf5	ENSDART00000138878	148	NM_001082894.1	148	TCONS_00002158	1056	same	0	V4 longer	908
alg10	ENSDART00000076037	439	NM_001327833.1	847	TCONS_00089010	1754	RefSeq longer	-408	V4 longer	907
ankrd12	ENSDART00000146037	3773	XM_017357915.1	1245	TCONS_00052069	4679	Ens95 longer	2528	V4 longer	906
npdc1a	ENSDART00000111666	165	NM_001128783.1	165	TCONS_00063355	1071	same	0	V4 longer	906
gfra4a	ENSDART00000141103	2390	NM_001123058.1	970	TCONS_00021391	3295	Ens95 longer	1420	V4 longer	905
mrtfba	ENSDART00000153177	869	XM_009306703.3	6491	TCONS_00015164	7396	RefSeq longer	-5622	V4 longer	905
sla1	ENSDART00000076518	352	NM_001034989.2	352	TCONS_00048968	1254	same	0	V4 longer	902
si:dkeyp-86h10.3	ENSDART00000134980	1506	XR_222347.4	2115	TCONS_00034682	3016	RefSeq longer	-609	V4 longer	901
slc1a7a	ENSDART00000124324	71	NM_001130622.2	71	TCONS_00049758	970	same	0	V4 longer	899
rbfox1l	ENSDART00000027364	769	XM_005158173.4	767	TCONS_00035483	1667	same	2	V4 longer	898
dusp22a	ENSDART00000078888	504	NM_001002514.1	504	TCONS_00042386	1401	same	0	V4 longer	897
june	ENSDART00000161456	806	NM_001076743.1	811	TCONS_00098594	1707	same	-5	V4 longer	896
sb:cb470	ENSDART00000186663	5	NM_001326596.1	5	TCONS_00078331	900	same	0	V4 longer	895
ercc3	ENSDART00000013066	283	NM_201582.1	280	TCONS_00108119	1173	same	3	V4 longer	890
si:ch1073-284b18.2	ENSDART00000006212	315	XM_017351454.2	1908	TCONS_00031636	2798	RefSeq longer	-1593	V4 longer	890
elovl6	ENSDART00000105602	1045	NM_199532.1	369	TCONS_00024316	1933	Ens95 longer	676	V4 longer	888
fam19a4b	ENSDART00000090401	579	NM_001077273.1	12	TCONS_00013175	1467	Ens95 longer	567	V4 longer	888
l1cama	ENSDART00000020296	115	XM_005162225.4	542	TCONS_00071063	1430	RefSeq longer	-427	V4 longer	888
il7r	ENSDART00000137959	385	NM_001113507.2	526	TCONS_00063763	1413	RefSeq longer	-141	V4 longer	887
hcrt	ENSDART00000104549	35	NM_001077392.2	20	TCONS_00081919	920	same	15	V4 longer	885
adra1bb	ENSDART00000060351	257	NM_001007358.2	252	TCONS_00024475	1142	same	5	V4 longer	885
esrrb	ENSDART00000190302	1095	NM_001324539.1	1095	TCONS_00038693	1980	same	0	V4 longer	885
pfkfb2a	ENSDART00000102328	1807	NM_201008.1	1807	TCONS_00073984	2692	same	0	V4 longer	885
plin6	ENSDART00000108596	1177	NM_001110481.1	1177	TCONS_00035226	2062	same	0	V4 longer	885
asb3	ENSDART00000021298	79	NM_199874.1	79	TCONS_00015378	962	same	0	V4 longer	883
gpc3	ENSDART00000173108	757	NM_001305618.1	758	TCONS_00026057	1641	same	-1	V4 longer	883
sarm1	ENSDART00000004200	1285	NM_001130596.1	95	TCONS_00030456	2167	Ens95 longer	1190	V4 longer	882
akt2	ENSDART00000026767	1445	NM_198146.2	1442	TCONS_00044569	2326	same	3	V4 longer	881
baiap3	ENSDART00000156693	112	XM_003198157.5	107	TCONS_00083479	991	same	5	V4 longer	879
si:ch73-6k14.2	ENSDART00000150386	586	XM_021477215.1	21	TCONS_00004955	1464	Ens95 longer	565	V4 longer	878
foxl2b	ENSDART00000098940	209	NM_001317761.1	209	TCONS_00055257	1087	same	0	V4 longer	878
helz	ENSDART00000044096	255	NM_213266.1	265	TCONS_00083999	1142	same	-10	V4 longer	877
atp6v0a2b	ENSDART00000029699	981	NM_001122747.2	656	TCONS_00099421	1857	Ens95 longer	325	V4 longer	876
tmed6	ENSDART00000126879	55	XM_005163211.4	35	TCONS_00079398	929	same	20	V4 longer	874
sntb1	ENSDART00000125691	196	NM_001002175.1	416	TCONS_00034446	1289	RefSeq longer	-220	V4 longer	873
dus1l	ENSDART00000113105	536	NM_199617.2	539	TCONS_00082997	1411	same	-3	V4 longer	872
meis3	ENSDART00000018945	873	NM_131778.2	737	TCONS_00029385	1743	Ens95 longer	136	V4 longer	870
ptrh1	ENSDART00000169209	898	NM_001013330.2	247	TCONS_00101391	1767	Ens95 longer	651	V4 longer	869
mov10b.1	ENSDART00000086946	166	NM_001044342.2	166	TCONS_00121162	1032	same	0	V4 longer	866
si:ch211-202f5.3	ENSDART00000135520	2532	XM_021476645.1	827	TCONS_00101049	3396	Ens95 longer	1705	V4 longer	864
aqp7	ENSDART00000123522	1450	XM_005161011.4	1586	TCONS_00060945	2449	RefSeq longer	-136	V4 longer	863
si:dkey-1h24.2	ENSDART00000109224	160	NM_001114714.2	160	TCONS_00004255	1022	same	0	V4 longer	862
adtrp1	ENSDART00000039829	549	NM_001017719.1	549	TCONS_00069923	1410	same	0	V4 longer	861
tspan2b	ENSDART00000146776	789	XM_005161898.4	1737	TCONS_00071969	2598	RefSeq longer	-948	V4 longer	861
arxa	ENSDART00000080810	52	NM_131384.1	52	TCONS_00076715	911	same	0	V4 longer	859
dock5	ENSDART00000135834	51	NM_001110012.1	51	TCONS_00119977	909	same	0	V4 longer	858
zgc:195282	ENSDART00000146410	693	NM_001305559.1	471	TCONS_00003672	1547	Ens95 longer	222	V4 longer	854
kctd3	ENSDART00000086164	750	XM_692476.9	338	TCONS_00037898	1601	Ens95 longer	412	V4 longer	851
CABZ01068358.1	ENSDART00000175448	416	XM_021480124.1	538	TCONS_00018330	1388	RefSeq longer	-122	V4 longer	850
six4b	ENSDART00000048110	451	NM_131717.2	556	TCONS_00056052	1406	RefSeq longer	-105	V4 longer	850
chmp6b	ENSDART00000181861	1711	NM_001003874.1	1712	TCONS_00015979	2561	same	-1	V4 longer	849
galnt8b.1	ENSDART00000067382	319	XM_003198223.5	915	TCONS_00087799	1763	RefSeq longer	-596	V4 longer	848
fstb	ENSDART00000110443	1134	NM_001109831.1	1125	TCONS_00006136	1977	same	9	V4 longer	843
senp8	ENSDART00000010322	102	XM_005166567.4	105	TCONS_00116394	947	same	-3	V4 longer	842
si:dkey-70b23.2	ENSDART00000137700	429	XM_003198723.4	686	TCONS_00101478	1528	RefSeq longer	-257	V4 longer	842
slc9a6a	ENSDART00000026195	5954	NM_001098256.2	1181	TCONS_00024109	6795	Ens95 longer	4773	V4 longer	841
cacna1sb	ENSDART00000062406	358	NM_214726.1	292	TCONS_00118277	1194	Ens95 longer	66	V4 longer	836
plod2	ENSDART00000005901	914	NM_001007377.2	914	TCONS_00074363	1750	same	0	V4 longer	836
lpcat4	ENSDART00000148530	604	NM_205559.2	371	TCONS_00110525	1439	Ens95 longer	233	V4 longer	835
otol1b	ENSDART00000081940	939	NM_001309456.1	939	TCONS_00027052	1774	same	0	V4 longer	835
ttc23	ENSDART00000138692	372	XM_003200452.5	426	TCONS_00042038	1260	RefSeq longer	-54	V4 longer	834
mst1ra	ENSDART00000150226	365	XM_001921257.5	622	TCONS_00107074	1455	RefSeq longer	-257	V4 longer	833
ino80b	ENSDART00000091099	411	NM_001077258.1	406	TCONS_00110875	1242	same	5	V4 longer	831
si:ch73-139j3.4	ENSDART00000128501	796	XM_005164597.4	1863	TCONS_00093394	2694	RefSeq longer	-1067	V4 longer	831
si:dkey-28a3.2	ENSDART00000165110	2621	XM_009303002.3	863	TCONS_00111268	3451	Ens95 longer	1758	V4 longer	830
galns	ENSDART00000149478	320	NM_001080641.2	67	TCONS_00116358	1150	Ens95 longer	253	V4 longer	830
erap1a	ENSDART00000147031	303	XM_005155533.4	207	TCONS_00005810	1133	Ens95 longer	96	V4 longer	830
dnajb9b	ENSDART00000024822	377	NM_001024393.1	370	TCONS_00094048	1207	same	7	V4 longer	830
baalca	ENSDART00000111383	211	XM_021466742.1	882	TCONS_00033733	1711	RefSeq longer	-671	V4 longer	829
wnt2ba	ENSDART00000103433	431	NM_182876.2	431	TCONS_00107234	1260	same	0	V4 longer	829
lamc1	ENSDART00000004277	982	NM_173277.1	899	TCONS_00051172	1807	Ens95 longer	83	V4 longer	825
nr1i2	ENSDART00000125174	944	XM_005167420.4	917	TCONS_00122833	1769	same	27	V4 longer	825
si:dkey-42i9.7	ENSDART00000105848	300	NM_001128696.1	73	TCONS_00068240	1123	Ens95 longer	227	V4 longer	823
miga2	ENSDART00000122699	273	NM_001013557.1	273	TCONS_00060483	1096	same	0	V4 longer	823
si:ch211-105f12.2	ENSDART00000129751	326	XM_001340816.7	804	TCONS_00027419	1627	RefSeq longer	-478	V4 longer	823
znf1114	ENSDART00000158444	1	XM_021475181.1	2807	TCONS_00094663	3630	RefSeq longer	-2806	V4 longer	823
flrt2	ENSDART00000152246	5469	XM_005160413.4	967	TCONS_00058248	6290	Ens95 longer	4502	V4 longer	821
hmcn2	ENSDART00000137897	757	XM_001920466.7	838	TCONS_00118756	1659	RefSeq longer	-81	V4 longer	821
smg5	ENSDART00000060809	142	NM_001024923.1	142	TCONS_00033501	963	same	0	V4 longer	821
hint3	ENSDART00000110100	299	NM_001326468.1	1303	TCONS_00033288	2123	RefSeq longer	-1004	V4 longer	820
crhr1	ENSDART00000156527	7776	XM_691254.6	2633	TCONS_00082114	8594	Ens95 longer	5143	V4 longer	818
bicdl1	ENSDART00000132404	326	XM_021478542.1	888	TCONS_00119873	1705	RefSeq longer	-562	V4 longer	817
ftr87	ENSDART00000158131	122	XM_003197959.5	409	TCONS_00054887	1225	RefSeq longer	-287	V4 longer	816
mcl1a	ENSDART00000114284	463	NM_131599.1	463	TCONS_00045010	1278	same	0	V4 longer	815
plrg1	ENSDART00000054235	515	NM_213440.1	512	TCONS_00001026	1324	same	3	V4 longer	809
cers3b	ENSDART00000132420	857	XM_005158997.4	1815	TCONS_00041446	2624	RefSeq longer	-958	V4 longer	809
nsun3	ENSDART00000131664	459	NM_001025302.1	161	TCONS_00001340	1267	Ens95 longer	298	V4 longer	808
ap4b1	ENSDART00000018230	46	NM_200338.1	46	TCONS_00069704	854	same	0	V4 longer	808
il2rb	ENSDART00000154799	1831	XM_005171592.4	2505	TCONS_00082388	3313	RefSeq longer	-674	V4 longer	808
si:dkey-9i23.16	ENSDART00000141145	223	NM_001145611.1	223	TCONS_00001867	1030	same	0	V4 longer	807
si:dkey-154b15.1	ENSDART00000161016	2065	XM_009294267.3	19	TCONS_00048501	2871	Ens95 longer	2046	V4 longer	806
rab10	ENSDART00000067776	225	NM_001002566.1	251	TCONS_00057377	1057	same	-26	V4 longer	806
syt2a	ENSDART00000139795	457	XM_005174112.4	443	TCONS_00070036	1262	same	14	V4 longer	805
xrn2	ENSDART00000162720	1552	NM_001001944.2	993	rna52592	2356	Ens95 longer	559	V4 longer	804
LOC101884237	ENSDART00000145394	348	XM_021469418.1	65	rna55514	1152	Ens95 longer	283	V4 longer	804
hoxb3a	ENSDART00000110682	517	NM_131115.2	86	ENSDART00000187409	1320	Ens95 longer	431	V4 longer	803
si:ch73-257c13.2	ENSDART00000145175	96	XM_002665743.5	88	TCONS_00056681	899	same	8	V4 longer	803
sigirr	ENSDART00000089680	1395	NM_001098250.1	1393	TCONS_00078665	2193	same	2	V4 longer	798
frem1a	ENSDART00000090165	472	NM_001190308.1	408	TCONS_00113735	1269	Ens95 longer	64	V4 longer	797
trpm1a	ENSDART00000052584	992	XM_017356917.2	450	TCONS_00115149	1787	Ens95 longer	542	V4 longer	795
trpm4a	ENSDART00000151329	672	XM_005164071.4	168	TCONS_00082769	1467	Ens95 longer	504	V4 longer	795
sh2b1	ENSDART00000141808	725	XM_005163818.4	961	TCONS_00081809	1755	RefSeq longer	-236	V4 longer	794
gpsm2l	ENSDART00000157616	529	XM_021469788.1	3676	TCONS_00071590	4468	RefSeq longer	-3147	V4 longer	792
si:ch73-352p4.8	ENSDART00000059440	1501	XM_692045.6	250	TCONS_00087883	2291	Ens95 longer	1251	V4 longer	790
cmc1	ENSDART00000161086	1190	NM_213326.2	809	TCONS_00036602	1976	Ens95 longer	381	V4 longer	786
cnfn	ENSDART00000135408	328	XM_017351471.2	407	TCONS_00034266	1193	RefSeq longer	-79	V4 longer	786
nek6	ENSDART00000132599	12	XM_021469005.1	1099	TCONS_00063068	1885	RefSeq longer	-1087	V4 longer	786
ckap5	ENSDART00000163512	2546	XM_005174247.4	521	TCONS_00080060	3331	Ens95 longer	2025	V4 longer	785
hs2st1b	ENSDART00000154568	3	XM_009302420.3	420	TCONS_00108982	1204	RefSeq longer	-417	V4 longer	784
gmpr	ENSDART00000050130	1751	NM_001020612.1	1751	TCONS_00048875	2534	same	0	V4 longer	783
kcnh5a	ENSDART00000103532	69	NM_001276280.1	69	TCONS_00058545	852	same	0	V4 longer	783
trpc6b	ENSDART00000097547	471	XM_002665399.5	811	TCONS_00042894	1594	RefSeq longer	-340	V4 longer	783
zgc:173705	ENSDART00000170639	488	NM_001327991.1	488	TCONS_00090755	1271	same	0	V4 longer	783
agtr1b	ENSDART00000149911	70	XM_005162528.4	1114	TCONS_00075990	1895	RefSeq longer	-1044	V4 longer	781
si:ch211-157b11.8	ENSDART00000085090	484	XM_009302604.3	638	TCONS_00106962	1418	RefSeq longer	-154	V4 longer	780
zgc:194930	ENSDART00000190788	46	NM_001130770.1	46	TCONS_00113464	825	same	0	V4 longer	779
cnpy3	ENSDART00000040116	708	NM_001039805.2	708	TCONS_00003300	1486	same	0	V4 longer	778
si:dkey-145c18.3	ENSDART00000136950	363	XM_009293769.2	318	ENSDART00000188785	1140	same	45	V4 longer	777
gss	ENSDART00000054909	368	NM_001006104.1	368	TCONS_00072485	1145	same	0	V4 longer	777
faf1	ENSDART00000034004	666	NM_212973.2	668	TCONS_00120431	1444	same	-2	V4 longer	776
sqlea	ENSDART00000110994	130	NM_001110039.1	134	TCONS_00033449	908	same	-4	V4 longer	774
tuba8l4	ENSDART00000151271	457	NM_200185.1	149	TCONS_00107924	1230	Ens95 longer	308	V4 longer	773
cpb1	ENSDART00000066833	1001	NM_001110021.2	897	TCONS_00075985	1774	Ens95 longer	104	V4 longer	773
abat	ENSDART00000185812	4099	NM_201498.2	532	TCONS_00085632	4871	Ens95 longer	3567	V4 longer	772
fut7	ENSDART00000065818	134	NM_001037390.3	134	TCONS_00061009	905	same	0	V4 longer	771
skib	ENSDART00000103549	893	NM_130938.1	893	TCONS_00013521	1664	same	0	V4 longer	771
nampta	ENSDART00000075320	190	XM_002661340.5	677	TCONS_00087696	1447	RefSeq longer	-487	V4 longer	770
cbr4	ENSDART00000016913	536	NM_205656.2	536	TCONS_00058703	1305	same	0	V4 longer	769
atic	ENSDART00000022307	606	NM_001082796.2	141	TCONS_00000228	1373	Ens95 longer	465	V4 longer	767
tmem41aa	ENSDART00000102430	653	NM_001020765.1	653	TCONS_00122870	1418	same	0	V4 longer	765
uqcrc1	ENSDART00000128047	248	NM_200820.1	250	TCONS_00106170	1014	same	-2	V4 longer	764
jam2b	ENSDART00000111437	57	NM_001128294.1	57	TCONS_00124026	819	same	0	V4 longer	762
bsx	ENSDART00000099983	293	NM_214727.1	80	TCONS_00009274	1054	Ens95 longer	213	V4 longer	761
tepsin	ENSDART00000105533	306	XM_001919649.5	142	TCONS_00015944	1066	Ens95 longer	164	V4 longer	760
snrnp35	ENSDART00000172191	113	NM_001030241.1	174	TCONS_00007767	934	RefSeq longer	-61	V4 longer	760
zgc:154142	ENSDART00000163939	1475	NM_001099240.1	1476	TCONS_00005033	2235	same	-1	V4 longer	759
gata5	ENSDART00000012194	712	NM_131235.2	684	TCONS_00070063	1468	same	28	V4 longer	756
ca8	ENSDART00000140012	1035	NM_001017571.1	1035	TCONS_00050388	1789	same	0	V4 longer	754
ywhaba	ENSDART00000025940	2802	NM_001082798.1	468	TCONS_00107347	3555	Ens95 longer	2334	V4 longer	753
kank4	ENSDART00000155790	864	XM_021477181.1	984	TCONS_00106587	1737	RefSeq longer	-120	V4 longer	753
ltk	ENSDART00000062907	123	XM_005158786.4	2935	TCONS_00040312	3686	RefSeq longer	-2812	V4 longer	751
zgc:158482	ENSDART00000097163	100	NM_001083019.1	100	TCONS_00041097	850	same	0	V4 longer	750
si:dkeyp-23e4.3	ENSDART00000138529	132	XM_005161428.4	176	TCONS_00064638	925	same	-44	V4 longer	749
tbl1xr1b	ENSDART00000146360	4109	NM_001326540.1	548	TCONS_00052605	4856	Ens95 longer	3561	V4 longer	747
crfb1	ENSDART00000099426	225	XM_021478750.1	455	TCONS_00123099	1202	RefSeq longer	-230	V4 longer	747
nyap2b	ENSDART00000133851	1328	XM_003197820.5	619	TCONS_00052518	2074	Ens95 longer	709	V4 longer	746
treh	ENSDART00000150218	219	XM_001336151.7	225	TCONS_00044641	971	same	-6	V4 longer	746
ugt2a7	ENSDART00000081791	314	NM_001113626.1	314	TCONS_00098882	1060	same	0	V4 longer	746
ighmbp2	ENSDART00000060291	344	NM_001044900.1	344	TCONS_00044039	1089	same	0	V4 longer	745
snx22	ENSDART00000136054	374	NM_001045374.2	322	TCONS_00079710	1116	Ens95 longer	52	V4 longer	742
rxrab	ENSDART00000016321	529	XM_009301955.3	710	TCONS_00104692	1451	RefSeq longer	-181	V4 longer	741
slc25a11	ENSDART00000051849	621	NM_001002099.1	621	TCONS_00104937	1362	same	0	V4 longer	741
mafgb	ENSDART00000172999	1791	NM_212941.1	1791	TCONS_00012176	2529	same	0	V4 longer	738
myo18aa	ENSDART00000132023	963	XM_009305577.3	964	TCONS_00009581	1702	same	-1	V4 longer	738
si:dkey-264d12.1	ENSDART00000158809	233	XM_005155908.4	480	TCONS_00011908	1218	RefSeq longer	-247	V4 longer	738
si:dkeyp-104h9.5	ENSDART00000145429	828	NM_001113612.1	828	TCONS_00122035	1566	same	0	V4 longer	738
mapkapk2b	ENSDART00000003954	30	NM_001101803.1	30	TCONS_00118967	767	same	0	V4 longer	737
tox2	ENSDART00000171073	962	XM_017356458.2	1120	TCONS_00110379	1857	RefSeq longer	-158	V4 longer	737
rhbdd3	ENSDART00000111302	402	NM_001128359.1	402	TCONS_00099425	1138	same	0	V4 longer	736
slc39a8	ENSDART00000170309	604	XM_009307205.3	532	TCONS_00021299	1339	Ens95 longer	72	V4 longer	735
defbl3	ENSDART00000156458	328	NM_001081555.1	328	TCONS_00029292	1062	same	0	V4 longer	734
cyb561	ENSDART00000055659	118	NM_001128744.1	118	TCONS_00085374	851	same	0	V4 longer	733
ugt1b5	ENSDART00000122424	95	NM_001177342.1	323	ENSDART00000126815	1055	RefSeq longer	-228	V4 longer	732
ugt1b5	ENSDART00000127797	95	NM_001177342.1	323	ENSDART00000126815	1055	RefSeq longer	-228	V4 longer	732
casp6l1	ENSDART00000183902	1419	NM_001005973.1	325	TCONS_00086039	2149	Ens95 longer	1094	V4 longer	730
nrxn3a	ENSDART00000154519	2395	XM_021467191.1	1729	TCONS_00039595	3124	Ens95 longer	666	V4 longer	729
prelp	ENSDART00000155521	931	XM_001923555.7	341	TCONS_00011076	1660	Ens95 longer	590	V4 longer	729
arl9	ENSDART00000106672	223	NM_001045387.1	228	TCONS_00024874	956	same	-5	V4 longer	728
fam102ba	ENSDART00000087054	878	NM_001045316.1	878	TCONS_00054694	1606	same	0	V4 longer	728
sp3b	ENSDART00000151484	398	XM_005165798.4	998	TCONS_00108192	1725	RefSeq longer	-600	V4 longer	727
cul5a	ENSDART00000110111	326	NM_001328059.1	2360	TCONS_00029802	3086	RefSeq longer	-2034	V4 longer	726
pcyt1ba	ENSDART00000065288	127	XM_005162665.4	248	TCONS_00075052	974	RefSeq longer	-121	V4 longer	726
march8	ENSDART00000176027	3759	NM_001161435.2	3764	TCONS_00021484	4489	same	-5	V4 longer	725
tgm1	ENSDART00000149545	639	XM_009296576.3	285	TCONS_00069774	1363	Ens95 longer	354	V4 longer	724
hebp2	ENSDART00000062536	884	NM_200198.1	753	TCONS_00059130	1608	Ens95 longer	131	V4 longer	724
zdhhc7	ENSDART00000020233	350	NM_001002602.1	353	TCONS_00041336	1077	same	-3	V4 longer	724
b3glctb	ENSDART00000109563	309	NM_001302248.1	309	TCONS_00007203	1030	same	0	V4 longer	721
vwa5b2	ENSDART00000168469	557	XM_021467972.1	619	TCONS_00054648	1340	RefSeq longer	-62	V4 longer	721
rexo1	ENSDART00000079618	355	NM_001126416.1	355	TCONS_00117823	1075	same	0	V4 longer	720
slc7a4	ENSDART00000098701	250	NM_194427.2	247	TCONS_00118914	969	same	3	V4 longer	719
dmrta2	ENSDART00000057590	74	NM_001007064.2	74	TCONS_00120429	792	same	0	V4 longer	718
tm7sf2	ENSDART00000042162	192	NM_001008597.1	192	TCONS_00006956	910	same	0	V4 longer	718
rhcgl1	ENSDART00000004727	471	NM_001109843.1	471	TCONS_00106756	1188	same	0	V4 longer	717
arnt2	ENSDART00000167323	4321	XM_009302938.3	93	TCONS_00110981	5037	Ens95 longer	4228	V4 longer	716
arf4a	ENSDART00000067604	2575	NM_001003590.1	525	TCONS_00012021	3288	Ens95 longer	2050	V4 longer	713
adgrl2a	ENSDART00000171813	2176	XM_005172842.4	1410	TCONS_00010463	2885	Ens95 longer	766	V4 longer	709
atxn10	ENSDART00000066980	90	NM_001130612.1	90	TCONS_00094120	798	same	0	V4 longer	708
mtx1a	ENSDART00000113714	2130	NM_001128238.1	2130	TCONS_00036060	2838	same	0	V4 longer	708
mcf2l2	ENSDART00000168001	2197	XM_009305853.3	344	TCONS_00012768	2904	Ens95 longer	1853	V4 longer	707
acvr1l	ENSDART00000017977	1764	XM_021478751.1	1762	TCONS_00051474	2471	same	2	V4 longer	707
rbm7	ENSDART00000009775	568	NM_199925.1	568	TCONS_00043089	1275	same	0	V4 longer	707
znf1117	ENSDART00000168400	512	NM_001327996.1	512	TCONS_00092200	1219	same	0	V4 longer	707
thap12b	ENSDART00000005221	143	NM_001002680.1	143	TCONS_00027632	847	same	0	V4 longer	704
pus3	ENSDART00000048640	283	NM_200067.1	143	TCONS_00075463	986	Ens95 longer	140	V4 longer	703
pmpca	ENSDART00000164278	648	NM_001007442.1	648	TCONS_00101388	1349	same	0	V4 longer	701
tdp2a	ENSDART00000102212	198	XM_005158303.4	878	TCONS_00035775	1575	RefSeq longer	-680	V4 longer	697
sncb	ENSDART00000158723	75	NM_200969.1	101	TCONS_00024703	797	same	-26	V4 longer	696
adck2	ENSDART00000113032	832	XM_695757.8	842	TCONS_00077735	1535	same	-10	V4 longer	693
b3gnt2a	ENSDART00000074221	168	NM_212840.1	168	TCONS_00005159	861	same	0	V4 longer	693
si:dkey-71b5.7	ENSDART00000116114	1128	XM_009292280.3	488	TCONS_00034792	1818	Ens95 longer	640	V4 longer	690
myd88	ENSDART00000011143	352	NM_212814.2	352	TCONS_00076505	1042	same	0	V4 longer	690
ltc4s	ENSDART00000090711	1934	XM_003199867.5	741	TCONS_00025542	2621	Ens95 longer	1193	V4 longer	687
si:dkey-238c7.16	ENSDART00000101292	83	NM_001044882.2	600	TCONS_00043570	1287	RefSeq longer	-517	V4 longer	687
vps33b	ENSDART00000065868	718	NM_001014348.1	718	TCONS_00116114	1405	same	0	V4 longer	687
si:dkey-21c1.1	ENSDART00000152968	2902	NM_001328019.1	200	TCONS_00017908	3587	Ens95 longer	2702	V4 longer	685
cd28l	ENSDART00000143229	192	XM_005167512.4	259	TCONS_00122975	943	RefSeq longer	-67	V4 longer	684
fam69ab	ENSDART00000087440	72	XM_001338113.7	2459	TCONS_00109070	3143	RefSeq longer	-2387	V4 longer	684
si:dkeyp-27e10.3	ENSDART00000146858	3499	XM_017355282.2	499	TCONS_00093465	4182	Ens95 longer	3000	V4 longer	683
abcc6b.2	ENSDART00000172943	248	XM_003198146.5	848	TCONS_00086442	1531	RefSeq longer	-600	V4 longer	683
st6galnac4	ENSDART00000166652	260	NM_001045370.1	260	TCONS_00062872	943	same	0	V4 longer	683
jph2	ENSDART00000043429	415	NM_001089364.1	415	TCONS_00073717	1097	same	0	V4 longer	682
grhl2b	ENSDART00000149221	1840	XM_005159580.4	858	TCONS_00045652	2519	Ens95 longer	982	V4 longer	679
tubd1	ENSDART00000146735	1338	XM_005157418.4	577	TCONS_00029820	2016	Ens95 longer	761	V4 longer	678
tmc2a	ENSDART00000073638	564	NM_001302237.1	564	TCONS_00100994	1240	same	0	V4 longer	676
ggact.3	ENSDART00000103785	1098	NM_001089560.1	1073	TCONS_00003016	1773	same	25	V4 longer	675
tmprss9	ENSDART00000145551	1595	XM_021469569.1	1685	TCONS_00066258	2358	RefSeq longer	-90	V4 longer	673
sdr42e1	ENSDART00000169974	499	NM_001037690.2	499	TCONS_00043304	1171	same	0	V4 longer	672
asip1	ENSDART00000113083	273	XM_005172113.4	2214	TCONS_00110102	2883	RefSeq longer	-1941	V4 longer	669
pex10	ENSDART00000060853	341	NM_001005994.1	341	TCONS_00122020	1010	same	0	V4 longer	669
prxl2c	ENSDART00000169095	213	XM_009303701.3	213	TCONS_00119772	882	same	0	V4 longer	669
efhc1	ENSDART00000023058	258	NM_200967.1	64	TCONS_00059988	925	Ens95 longer	194	V4 longer	667
zgc:112433	ENSDART00000163437	217	XM_009303714.3	232	TCONS_00117156	897	same	-15	V4 longer	665
rbm22	ENSDART00000003983	550	NM_213214.1	553	TCONS_00064568	1215	same	-3	V4 longer	662
doc2a	ENSDART00000136912	133	XM_003198077.5	3550	TCONS_00081824	4211	RefSeq longer	-3417	V4 longer	661
cdc42bpab	ENSDART00000040456	1671	XM_005160749.4	1673	TCONS_00056859	2331	same	-2	V4 longer	658
cxxc5b	ENSDART00000109941	2637	XM_005157159.4	1672	TCONS_00023294	3293	Ens95 longer	965	V4 longer	656
apmap	ENSDART00000025910	866	NM_212608.1	580	TCONS_00018821	1522	Ens95 longer	286	V4 longer	656
phox2ba	ENSDART00000141795	128	NM_001145703.1	128	TCONS_00003678	784	same	0	V4 longer	656
kpna3	ENSDART00000074519	2386	NM_201320.2	266	TCONS_00004866	3040	Ens95 longer	2120	V4 longer	654
adssl1	ENSDART00000172540	2642	NM_214820.1	2644	TCONS_00036693	3298	same	-2	V4 longer	654
osbpl3a	ENSDART00000142841	559	NM_001004646.1	273	TCONS_00045936	1209	Ens95 longer	286	V4 longer	650
gramd4a	ENSDART00000134605	1819	XM_009300456.3	1936	TCONS_00094540	2586	RefSeq longer	-117	V4 longer	650
tsg101a	ENSDART00000031814	423	NM_001002089.1	415	TCONS_00080572	1071	same	8	V4 longer	648
cdc37l1	ENSDART00000127331	1207	NM_001109826.2	272	TCONS_00006210	1854	Ens95 longer	935	V4 longer	647
usp43b	ENSDART00000122735	530	XM_001920256.7	3122	TCONS_00085527	3769	RefSeq longer	-2592	V4 longer	647
ttc6	ENSDART00000160994	424	XM_009292851.3	63	TCONS_00039244	1070	Ens95 longer	361	V4 longer	646
slc6a11b	ENSDART00000173228	275	XM_017358255.2	82	TCONS_00012358	921	Ens95 longer	193	V4 longer	646
si:ch211-223a21.4	ENSDART00000159754	539	XM_009300870.3	539	TCONS_00091768	1184	same	0	V4 longer	645
klhl6	ENSDART00000039174	123	NM_001005316.2	123	TCONS_00051290	767	same	0	V4 longer	644
ppm1db	ENSDART00000014028	218	NM_001007340.1	218	TCONS_00104436	862	same	0	V4 longer	644
wasa	ENSDART00000026807	233	XM_694827.8	1009	TCONS_00118265	1650	RefSeq longer	-776	V4 longer	641
ap1s3a	ENSDART00000171305	348	XM_009291950.3	511	TCONS_00031275	1151	RefSeq longer	-163	V4 longer	640
fam241a	ENSDART00000079594	1422	NM_001020775.1	1422	TCONS_00021358	2061	same	0	V4 longer	639
syne2b	ENSDART00000135510	2660	XM_021480883.1	2665	TCONS_00022434	3304	same	-5	V4 longer	639
si:dkey-46g23.1	ENSDART00000140482	5394	XM_001332799.8	1355	TCONS_00084296	6032	Ens95 longer	4039	V4 longer	638
bcl2b	ENSDART00000149947	2787	XM_001341178.7	1565	TCONS_00052849	3425	Ens95 longer	1222	V4 longer	638
cfap206	ENSDART00000036373	141	NM_205617.1	141	TCONS_00057837	778	same	0	V4 longer	637
gpx9	ENSDART00000152850	925	XM_005169486.4	418	TCONS_00016173	1561	Ens95 longer	507	V4 longer	636
phf20l1	ENSDART00000002930	879	XM_009292481.3	464	TCONS_00035427	1515	Ens95 longer	415	V4 longer	636
tmem107l	ENSDART00000127072	497	XM_682699.7	106	TCONS_00073314	1133	Ens95 longer	391	V4 longer	636
si:dkey-241l7.6	ENSDART00000060466	186	XM_017352571.2	71	TCONS_00060236	822	Ens95 longer	115	V4 longer	636
mcm9	ENSDART00000139805	488	NM_001346160.1	387	TCONS_00057148	1124	Ens95 longer	101	V4 longer	636
tubb6	ENSDART00000166661	365	NM_001017762.2	110	TCONS_00075947	1000	Ens95 longer	255	V4 longer	635
chodl	ENSDART00000041335	273	NM_001017578.2	273	TCONS_00075022	908	same	0	V4 longer	635
march6	ENSDART00000145732	1734	NM_001291707.1	2343	TCONS_00050882	2978	RefSeq longer	-609	V4 longer	635
si:dkey-91i10.3	ENSDART00000079879	447	NM_001123277.1	447	TCONS_00123380	1081	same	0	V4 longer	634
mtpap	ENSDART00000111334	553	XM_021480322.1	2197	TCONS_00015348	2830	RefSeq longer	-1644	V4 longer	633
wdr92	ENSDART00000054318	542	NM_001017621.1	542	TCONS_00018609	1174	same	0	V4 longer	632
zgc:110158	ENSDART00000138822	5669	XM_009298722.3	954	TCONS_00054406	6300	Ens95 longer	4715	V4 longer	631
zgc:110353	ENSDART00000057624	157	NM_001017785.1	137	TCONS_00120992	788	same	20	V4 longer	631
aes	ENSDART00000105564	742	NM_200423.1	742	TCONS_00068911	1371	same	0	V4 longer	629
six6a	ENSDART00000030646	329	NM_201105.1	329	TCONS_00020158	958	same	0	V4 longer	629
stac	ENSDART00000154623	244	XM_001344434.7	1026	TCONS_00037623	1653	RefSeq longer	-782	V4 longer	627
uap1l1	ENSDART00000023463	94	NM_200294.1	94	TCONS_00099837	721	same	0	V4 longer	627
prss12	ENSDART00000140263	3197	XM_001920264.5	645	TCONS_00000860	3822	Ens95 longer	2552	V4 longer	625
slc47a3	ENSDART00000155352	203	XM_005157658.4	38	TCONS_00028030	828	Ens95 longer	165	V4 longer	625
cbln12	ENSDART00000143433	146	NM_001243318.1	146	TCONS_00054280	770	same	0	V4 longer	624
ttc17	ENSDART00000065864	1209	XM_692933.8	360	TCONS_00116106	1831	Ens95 longer	849	V4 longer	622
fgf1a	ENSDART00000005842	1184	NM_200760.1	1174	TCONS_00025703	1806	same	10	V4 longer	622
spoplb	ENSDART00000109418	813	NM_001079969.1	809	TCONS_00011682	1435	same	4	V4 longer	622
arid6	ENSDART00000142431	248	NM_001080201.1	248	TCONS_00060877	870	same	0	V4 longer	622
oprd1b	ENSDART00000054037	1107	NM_212755.2	1107	TCONS_00033061	1729	same	0	V4 longer	622
adgrg11	ENSDART00000060710	962	XM_017352711.2	1028	TCONS_00057312	1649	RefSeq longer	-66	V4 longer	621
itprip	ENSDART00000002741	204	NM_001017872.1	182	TCONS_00021777	824	same	22	V4 longer	620
prkg1b	ENSDART00000152765	773	XM_009306442.3	517	TCONS_00014681	1391	Ens95 longer	256	V4 longer	618
plppr2a	ENSDART00000184127	421	NM_200456.1	420	TCONS_00081746	1039	same	1	V4 longer	618
dusp16	ENSDART00000161055	2755	NM_213240.2	2755	TCONS_00092788	3373	same	0	V4 longer	618
cxcl12a	ENSDART00000053946	2644	NM_178307.2	1155	TCONS_00020079	3261	Ens95 longer	1489	V4 longer	617
stambpb	ENSDART00000170360	964	NM_001037570.1	666	TCONS_00119523	1581	Ens95 longer	298	V4 longer	617
crocc2	ENSDART00000065238	784	XM_009302427.3	585	TCONS_00106338	1401	Ens95 longer	199	V4 longer	617
ciz1a	ENSDART00000167337	635	XM_009301125.3	1968	TCONS_00101673	2584	RefSeq longer	-1333	V4 longer	616
gig2p	ENSDART00000144237	216	NM_001100055.1	216	TCONS_00104516	831	same	0	V4 longer	615
hspa12b	ENSDART00000087093	536	NM_001042686.1	536	TCONS_00113442	1151	same	0	V4 longer	615
minpp1b	ENSDART00000012421	301	NM_201100.1	301	TCONS_00017204	916	same	0	V4 longer	615
scara5	ENSDART00000152373	971	XM_005160318.4	2530	TCONS_00057770	3141	RefSeq longer	-1559	V4 longer	611
lzts3b	ENSDART00000149276	299	XM_009303698.3	717	TCONS_00117042	1326	RefSeq longer	-418	V4 longer	609
si:dkeyp-38g8.5	ENSDART00000050407	94	NM_001123290.1	94	TCONS_00088549	702	same	0	V4 longer	608
syngr2b	ENSDART00000161712	1036	NM_001082858.1	170	TCONS_00014359	1641	Ens95 longer	866	V4 longer	605
ropn1l	ENSDART00000081234	339	NM_001004624.1	128	TCONS_00074977	944	Ens95 longer	211	V4 longer	605
mia	ENSDART00000074290	22	NM_001128754.1	22	TCONS_00104509	627	same	0	V4 longer	605
pmvk	ENSDART00000149620	1273	NM_001083579.1	1256	TCONS_00034091	1875	same	17	V4 longer	602
bag3	ENSDART00000057689	715	NM_001003533.2	715	TCONS_00019746	1317	same	0	V4 longer	602
GPR62_1_of_many	ENSDART00000131104	57	XM_021479881.1	243	TCONS_00011725	845	RefSeq longer	-186	V4 longer	602
lima1a	ENSDART00000172441	608	NM_131664.1	608	TCONS_00071402	1208	same	0	V4 longer	600
selenoo2	ENSDART00000103219	510	NM_001348085.1	1446	TCONS_00087838	2044	RefSeq longer	-936	V4 longer	598
glrx	ENSDART00000134469	561	NM_001005942.1	557	TCONS_00060922	1158	same	4	V4 longer	597
cplx2	ENSDART00000163669	5206	XM_021481024.1	5211	TCONS_00025794	5808	same	-5	V4 longer	597
glrx2	ENSDART00000162227	313	XM_005161733.4	401	TCONS_00066849	997	RefSeq longer	-88	V4 longer	596
elovl6l	ENSDART00000067537	1450	NM_201500.1	1450	TCONS_00021589	2039	same	0	V4 longer	589
si:ch211-207j7.2	ENSDART00000152071	657	XM_001921109.6	466	TCONS_00105594	1244	Ens95 longer	191	V4 longer	587
muc13a	ENSDART00000142702	266	XM_003197702.5	619	TCONS_00001896	1204	RefSeq longer	-353	V4 longer	585
amt	ENSDART00000087151	645	NM_001006021.1	814	TCONS_00118362	1398	RefSeq longer	-169	V4 longer	584
iqch	ENSDART00000079691	953	XM_005159132.4	1817	TCONS_00041967	2401	RefSeq longer	-864	V4 longer	584
apip	ENSDART00000007487	28	NM_001004679.1	28	TCONS_00113066	611	same	0	V4 longer	583
shank3b	ENSDART00000150569	327	XM_005164598.4	2254	TCONS_00093398	2834	RefSeq longer	-1927	V4 longer	580
wisp1a	ENSDART00000076506	297	NM_001166230.1	297	TCONS_00046462	877	same	0	V4 longer	580
nfatc1	ENSDART00000052521	976	NM_001045159.1	56	TCONS_00046026	1555	Ens95 longer	920	V4 longer	579
nwd1	ENSDART00000156764	106	XM_002663705.6	137	TCONS_00010439	714	same	-31	V4 longer	577
si:dkey-35h6.1	ENSDART00000166434	3803	XR_002459937.1	896	TCONS_00025424	4379	Ens95 longer	2907	V4 longer	576
slc10a4	ENSDART00000022887	228	NM_001044803.2	1131	TCONS_00058685	1704	RefSeq longer	-903	V4 longer	573
igf1	ENSDART00000004717	504	NM_131825.2	799	TCONS_00088591	1371	RefSeq longer	-295	V4 longer	572
CR759879.1	ENSDART00000163051	168	NM_001302240.1	168	TCONS_00101247	739	same	0	V4 longer	571
cyldl	ENSDART00000157353	58	XM_003198803.4	2278	TCONS_00106600	2849	RefSeq longer	-2220	V4 longer	571
spata4	ENSDART00000052562	206	NM_001004013.1	208	TCONS_00026430	778	same	-2	V4 longer	570
ryr2b	ENSDART00000165606	5104	XM_021467388.1	241	TCONS_00039666	5673	Ens95 longer	4863	V4 longer	569
otud5b	ENSDART00000121478	391	NM_001327765.1	276	TCONS_00011358	956	Ens95 longer	115	V4 longer	565
si:ch73-22o12.1	ENSDART00000091241	4334	XM_021466855.1	4334	TCONS_00031907	4898	same	0	V4 longer	564
naglu	ENSDART00000048046	1286	XM_683516.7	232	TCONS_00077315	1846	Ens95 longer	1054	V4 longer	560
vcpkmt	ENSDART00000153669	554	NM_001045345.1	554	TCONS_00038437	1114	same	0	V4 longer	560
tuft1b	ENSDART00000146747	1736	NM_001082986.1	394	TCONS_00045418	2294	Ens95 longer	1342	V4 longer	558
qsox1	ENSDART00000057645	321	NM_001128364.1	321	TCONS_00120379	879	same	0	V4 longer	558
mtnr1aa	ENSDART00000054674	524	NM_131393.1	521	TCONS_00003631	1080	same	3	V4 longer	556
gmip	ENSDART00000108639	717	XM_689070.8	1312	TCONS_00083685	1868	RefSeq longer	-595	V4 longer	556
si:ch73-362m14.2	ENSDART00000151627	22	XM_017353059.2	278	TCONS_00065020	830	RefSeq longer	-256	V4 longer	552
cfap53	ENSDART00000167230	49	NM_001045130.2	49	TCONS_00063782	599	same	0	V4 longer	550
mlphb	ENSDART00000148226	59	XM_021478921.1	361	TCONS_00123436	911	RefSeq longer	-302	V4 longer	550
ttc13	ENSDART00000092217	414	NM_001130627.1	414	TCONS_00057921	964	same	0	V4 longer	550
nrd1b	ENSDART00000129109	1546	NM_001044715.2	300	TCONS_00066452	2095	Ens95 longer	1246	V4 longer	549
ggt1a	ENSDART00000141455	247	XM_017357293.2	1051	TCONS_00121663	1600	RefSeq longer	-804	V4 longer	549
skilb	ENSDART00000031426	70	XM_005162773.4	2167	TCONS_00076910	2714	RefSeq longer	-2097	V4 longer	547
gabrr2b	ENSDART00000023304	342	XM_021468563.1	273	TCONS_00057748	888	Ens95 longer	69	V4 longer	546
anks1b	ENSDART00000133509	1321	XM_009300300.3	1322	TCONS_00094057	1868	same	-1	V4 longer	546
znf1112	ENSDART00000150647	472	XM_021475458.1	1219	TCONS_00089398	1765	RefSeq longer	-747	V4 longer	546
ndufv3	ENSDART00000102214	146	XM_009304655.3	146	TCONS_00123144	691	same	0	V4 longer	545
bloc1s3	ENSDART00000156213	545	NM_001025476.1	714	ENSDART00000109593	1257	RefSeq longer	-169	V4 longer	543
si:ch73-109d9.3	ENSDART00000160276	4236	XM_005160085.4	913	TCONS_00004711	4777	Ens95 longer	3323	V4 longer	541
sash3	ENSDART00000023540	338	XM_685351.9	1098	TCONS_00026312	1637	RefSeq longer	-760	V4 longer	539
ftr01	ENSDART00000100524	286	XM_689057.8	598	TCONS_00049976	1136	RefSeq longer	-312	V4 longer	538
npm1b	ENSDART00000054876	2441	NM_001166155.1	622	TCONS_00025140	2978	Ens95 longer	1819	V4 longer	537
ntn5	ENSDART00000174001	1567	XM_005172234.4	872	TCONS_00114719	2104	Ens95 longer	695	V4 longer	537
zgc:112994	ENSDART00000137969	650	NM_001020707.1	650	TCONS_00071484	1187	same	0	V4 longer	537
si:ch73-362m14.4	ENSDART00000151030	250	XM_003200906.5	744	TCONS_00065023	1278	RefSeq longer	-494	V4 longer	534
si:ch1073-145m9.1	ENSDART00000156304	545	XM_005157607.4	622	TCONS_00027900	1155	RefSeq longer	-77	V4 longer	533
fibpb	ENSDART00000146956	610	XM_009295296.3	2692	rna54303	3224	RefSeq longer	-2082	V4 longer	532
ap3d1	ENSDART00000160165	31	XM_009296263.3	429	TCONS_00068941	960	RefSeq longer	-398	V4 longer	531
trappc12	ENSDART00000156215	1396	XM_005169884.4	308	TCONS_00040998	1926	Ens95 longer	1088	V4 longer	530
ogdha	ENSDART00000148206	2596	NM_200779.3	1626	TCONS_00121921	3126	Ens95 longer	970	V4 longer	530
snx8a	ENSDART00000109392	1100	NM_001326490.1	1100	TCONS_00083395	1630	same	0	V4 longer	530
tbx16	ENSDART00000007090	3354	NM_131058.1	965	TCONS_00122246	3882	Ens95 longer	2389	V4 longer	528
sap130a	ENSDART00000123324	1179	NM_001098777.2	961	TCONS_00106375	1703	Ens95 longer	218	V4 longer	524
si:ch211-134c9.2	ENSDART00000137138	266	XR_658196.3	423	TCONS_00003847	946	RefSeq longer	-157	V4 longer	523
znf292a	ENSDART00000004424	264	XM_005169874.4	602	TCONS_00040873	1125	RefSeq longer	-338	V4 longer	523
pacs1a	ENSDART00000065420	451	NM_001098748.1	451	TCONS_00061885	971	same	0	V4 longer	520
aadacl4	ENSDART00000065851	313	NM_001172642.1	297	TCONS_00011466	830	same	16	V4 longer	517
htra1b	ENSDART00000012318	2219	NM_001111182.1	2219	TCONS_00017016	2736	same	0	V4 longer	517
[truncated: 14,559 more rows]

## Sheet: 2 kdrl expression
V4_3Abbrev	EnsdartID	Ens95 avg KdrlPos	Ens95 kdrl LgFC	Ens95 kdrl padj	RefSeqID	RefSeq Avg KdrlPos	RefSeq kdrl LgFC	RefSeq kdrl padj	V4tconsID	V4_3 Avg Kdrl Pos	V4 kdrl LgFC	V4 kdrl padj	Ens95 vs RefSeq	V4 vs Ens95/RefSeq
a1cf	ENSDART00000152292	15.5165	-0.167478	0.954075	XM_009306436.3	3.86204	-1.90988	1	ENSDART00000152292	15.8578	-0.190788	0.946989	Ens95 longer	same
a2ml	ENSDART00000078734	64.2424	-0.588023	0.905771	XM_021481320.1	90.9205	-0.640052	0.881179	ENSDART00000078734	65.9648	-0.489054	0.876781	same	same
aaas	ENSDART00000163068	539.293	0.403848	0.651723	NM_213225.1	541.69	0.412784	0.605347	TCONS_00124789	554.966	0.462857	0.586568	same	same
aacs	ENSDART00000010101	26.463	-1.00189	0.424128	XM_005165076.4	198.953	-1.21099	0.0098423	TCONS_00102373	203.082	-1.15685	0.0135451	RefSeq longer	same
aadac	ENSDART00000093133	10.0214	-0.506562	0.886353	XM_009291389.3	22.3299	0.109108	0.975038	TCONS_00029071	116.24	-0.297406	0.772958	RefSeq longer	V4 longer
aadacl4	ENSDART00000065851	0.961967	-3.6336	0.219155	NM_001172642.1	0.963023	-3.63239	1	TCONS_00011466	3.88204	-1.87577	0.526369	same	V4 longer
aagab	ENSDART00000060344	219.294	0.231612	0.834419	NM_001002423.1	217.098	0.22202	0.817395	TCONS_00044028	224.795	0.295303	0.776388	same	same
aamdc	ENSDART00000165048	259.692	0.272323	0.788259	NM_001020764.1	253.522	0.295268	0.738929	TCONS_00043379	251.977	0.346655	0.718661	same	same
aamp	ENSDART00000102127	939.458	0.296154	0.739399	NM_212938.1	944.091	0.298606	0.699596	TCONS_00107669	966.334	0.348804	0.671001	same	same
aanat1	ENSDART00000053126	47.7492	-0.0505752	0.980351	NM_200704.1	47.4296	-0.0600422	0.970739	TCONS_00108913	48.1398	-0.04959	0.980336	same	same
aanat2	ENSDART00000018205	158.086	0.870036	0.201257	NM_131411.2	158.089	0.870209	0.177543	TCONS_00083767	184.144	1.03024	0.0897449	same	same
aar2	ENSDART00000014152	228.769	0.624315	0.403011	XM_005161924.4	229.09	0.63265	0.357898	TCONS_00072119	233.287	0.675654	0.325511	same	same
aars	ENSDART00000100401	1189.16	0.0341612	0.978445	NM_001044310.2	1185.07	0.0296961	0.976584	ENSDART00000100401	1221.03	0.0873166	0.937961	same	same
aars2	ENSDART00000178133	152.17	0.5637	0.448867	XM_021469605.1	7.44903	0.003103	1	TCONS_00066949	164.003	0.511579	0.479784	Ens95 longer	same
aarsd1	ENSDART00000002583	39.0057	-0.15976	0.924366	NM_001003572.1	39.0148	-0.148831	0.915821	TCONS_00016758	39.7098	-0.103638	0.953951	same	same
aasdh	ENSDART00000143555	28.1298	-0.169575	0.948482	XM_693810.8	25.8593	-0.291479	0.883253	TCONS_00056276	28.1655	-0.199072	0.938797	same	same
aasdhppt	ENSDART00000054605	70.7008	-0.505725	0.660063	NM_001033729.1	70.7053	-0.49619	0.631091	TCONS_00031338	75.9438	-0.385743	0.747796	same	same
aass	ENSDART00000073502	260.067	0.296487	0.726981	XM_005163116.4	35.8679	-0.0491946	0.980253	ENSDART00000073502	264.306	0.3422	0.652417	Ens95 longer	same
aatf	ENSDART00000170610	201.677	-0.119203	0.923306	NM_001083828.3	187.574	-0.0786463	0.945764	TCONS_00101026	206.833	-0.091328	0.941304	same	V4 longer
aatka	ENSDART00000149914	202.116	0.0805268	0.945306	XM_001344016.8	257.047	0.299217	0.683827	TCONS_00087096	1644.99	1.07498	0.0788205	Ens95 longer	V4 longer
abat	ENSDART00000185812	582.106	-0.211777	0.830915	NM_201498.2	388.703	0.175702	0.859393	TCONS_00085632	930.465	-0.442471	0.551917	Ens95 longer	V4 longer
abca12	ENSDART00000138634	350.679	-1.29178	0.149442	XM_681540.8	448.884	-1.17726	0.137609	ENSDART00000138634	358.62	-1.23122	0.172812	same	same
abca1a	ENSDART00000142465	7492.39	1.33257	0.0020223	NM_001309465.1	7481.78	1.33425	0.0013407	TCONS_00002259	7621.32	1.37805	0.000577263	same	same
abca1b	ENSDART00000148461	586.177	0.0166947	0.991954	NM_001114586.2	551.173	0.0210333	0.987127	TCONS_00023224	602.903	0.0673881	0.961743	same	V4 longer
abca2	ENSDART00000141554	94.4542	-0.812735	0.217141	XM_005165229.4	206.208	-1.10931	0.0678649	TCONS_00102848	224.191	-1.02266	0.0963018	RefSeq longer	V4 longer
abca3b	ENSDART00000165980	1132.64	-0.137829	0.865923	XM_021473118.1	1138.16	-0.134626	0.845533	TCONS_00081615	1165.6	-0.0828353	0.920132	same	same
abca4b	ENSDART00000144171	64.7411	-2.62328	0.00286873	XM_005163328.3	65.0747	-2.61347	0.00303114	TCONS_00050135	66.4524	-2.56673	0.00484521	same	same
abca5	ENSDART00000155563	717.815	0.75363	0.176402	XM_005156401.4	717.107	0.762163	0.144423	TCONS_00016058	910.638	0.553674	0.279094	Ens95 longer	V4 longer
abcb10	ENSDART00000088005	227.885	0.464212	0.618971	XM_001343182.8	214.944	0.351926	0.677569	TCONS_00019657	232.717	0.509383	0.558275	Ens95 longer	same
abcb11a	ENSDART00000139631	150.353	2.5585	7.83836e-05	XM_009304974.3	78.7688	1.64406	0.0630767	ENSDART00000139631	151.201	2.65938	3.26057e-05	Ens95 longer	same
abcb4	ENSDART00000148456	931.414	5.05221	7.16045e-13	NM_001316714.1	5096.93	6.19368	2.3428e-19	TCONS_00035212	957.084	5.12267	7.16284e-13	RefSeq longer	Ens95/RefSeq longer
abcb5	ENSDART00000185141	183.462	-0.981832	0.260352	XM_001922682.7	163.891	-0.624143	0.590693	TCONS_00034649	181.161	-0.588779	0.639194	Ens95 longer	same
abcb6a	ENSDART00000179970	22.2695	0.351742	0.88296	XM_005160290.4	124.248	0.156979	0.880485	TCONS_00000233	126.366	0.204933	0.859768	RefSeq longer	V4 longer
abcb7	ENSDART00000091169	311.468	0.0392136	0.973316	XM_689787.7	311.874	0.0411802	0.964075	TCONS_00023423	319.043	0.0952218	0.926349	same	same
abcb8	ENSDART00000079202	126.99	-0.522817	0.511022	NM_001017544.1	126.992	-0.520079	0.477518	TCONS_00077220	129.758	-0.470259	0.566412	same	same
abcb9	ENSDART00000078649	81.2945	0.0397322	0.990243	NM_001126434.1	81.3344	0.0461675	0.983736	TCONS_00103004	85.3056	0.124876	0.963244	same	same
abcc1	ENSDART00000161897	327.808	0.316495	0.721816	XM_001341859.7	316.768	0.277855	0.730682	TCONS_00083044	328.884	0.301874	0.730393	same	same
abcc10	ENSDART00000115249	145.221	0.288186	0.802248	XM_021479750.1	144.895	0.281042	0.782462	ENSDART00000115249	147.682	0.322681	0.772394	same	same
abcc12	ENSDART00000149382	334.165	2.95161	1.106e-05	XM_009303354.3	334.14	2.95155	1.09918e-05	TCONS_00115601	340.13	2.99641	1.07925e-05	same	same
abcc2	ENSDART00000016604	2056.88	4.21813	3.57697e-11	NM_200589.2	2060.45	4.22048	3.37961e-11	TCONS_00018581	2102.78	4.27699	1.409e-11	same	same
abcc3	ENSDART00000161691	79.6895	0.0998473	0.959452	XM_009306370.3	949.247	0.657143	0.165006	TCONS_00014447	973.89	0.703742	0.120017	RefSeq longer	V4 longer
abcc4	ENSDART00000065500	77.4795	1.35097	0.16118	NM_001007038.1	708.503	1.80147	0.00149487	TCONS_00105550	742.856	1.82032	0.00131968	RefSeq longer	same
abcc6a	ENSDART00000065433	56.1631	-0.105847	0.955694	XM_009302206.3	57.4362	-0.118965	0.937196	TCONS_00105786	59.4638	-0.0853585	0.963237	same	V4 longer
abcc6b.1	ENSDART00000173388	33.9034	0.0566459	0.979735	XM_017354804.2	99.1581	0.633126	0.58668	ENSDART00000173388	34.923	0.451602	0.793004	Ens95 longer	same
abcc6b.2	ENSDART00000172943	57.8237	1.21729	0.387064	XM_003198146.5	99.1581	0.633126	0.58668	TCONS_00086442	89.9023	0.71794	0.562853	RefSeq longer	V4 longer
abcc8	ENSDART00000149161	73.7212	-0.92562	0.360631	NM_001172647.2	101.894	-0.757871	0.425358	TCONS_00078704	104.274	-0.710406	0.496754	Ens95 longer	V4 longer
abcc9	ENSDART00000013990	38.6474	0.201215	0.924795	NM_001030154.1	65.3585	0.136346	0.927468	TCONS_00088449	67.3796	0.178731	0.918971	same	same
abcd1	ENSDART00000163232	26.1458	0.637128	0.763426	NM_001111186.1	45.5321	0.369647	0.820964	TCONS_00117349	72.4331	0.388525	0.80013	same	same
abcd3a	ENSDART00000161179	552.471	-0.0523877	0.964524	XM_021470125.1	554.152	-0.0472154	0.961365	TCONS_00077115	566.537	0.0078852	0.994197	same	same
abcd4	ENSDART00000129679	228.907	0.253614	0.760357	XM_005162867.4	228.606	0.266437	0.710254	TCONS_00075442	234.4	0.305318	0.685992	same	same
abce1	ENSDART00000192175	3048.03	0.595071	0.314997	NM_213051.2	3047.93	0.598779	0.27307	TCONS_00074027	3116.12	0.644385	0.243777	Ens95 longer	same
abcf2a	ENSDART00000056640	1301.68	0.626288	0.44513	NM_201315.2	1304.43	0.631872	0.400448	TCONS_00053873	1337.6	0.682211	0.387899	same	same
abcf2b	ENSDART00000074155	20.6118	-1.27903	0.219348	NM_001201361.1	6.43865	-0.542094	1	ENSDART00000074155	20.9691	-1.2377	0.245474	Ens95 longer	same
abcg1	ENSDART00000092809	58.8952	-2.04422	0.0227814	NM_001110454.1	58.9156	-2.03034	0.0225876	TCONS_00027140	136.441	-1.81306	0.0175169	same	V4 longer
abcg2c	ENSDART00000032322	379.458	0.131258	0.898842	XM_005156523.4	495.013	0.0866137	0.919401	TCONS_00020971	499.286	0.115151	0.905834	RefSeq longer	same
abcg2d	ENSDART00000146892	10.955	-0.916967	0.63039	XM_009294223.3	64.7984	-1.38289	0.122232	TCONS_00005013	66.4899	-1.33627	0.162483	RefSeq longer	same
abcg5	ENSDART00000091845	7.70787	-0.228715	0.960153	NM_001128690.1	5.45713	-0.378775	1	TCONS_00019013	8.04342	-0.117373	0.980646	Ens95 longer	same
abcg8	ENSDART00000159482	14.5716	-0.363259	0.92812	XM_005156539.4	14.5713	0.172729	1	TCONS_00021247	14.5885	-0.312742	0.942519	Ens95 longer	same
abch1	ENSDART00000135086	2.24459	-2.75636	0.332846	XM_005158536.4	89.9136	0.38737	0.672674	TCONS_00039913	121.294	-0.277732	0.797464	RefSeq longer	V4 longer
abhd10a	ENSDART00000158917	170.418	-0.217625	0.854171	XM_005165639.4	8.69278	-0.802799	1	TCONS_00104910	176.459	-0.181203	0.876716	Ens95 longer	same
abhd12	ENSDART00000104708	736.468	-0.123117	0.922121	NM_001076597.1	18.3216	-0.829679	0.729415	TCONS_00039766	752.079	-0.0683798	0.959028	Ens95 longer	same
abhd13	ENSDART00000082260	113.673	1.16388	0.228881	NM_001037685.1	113.675	1.16382	0.207965	TCONS_00125069	244.962	1.0103	0.109816	same	V4 longer
abhd14a	ENSDART00000081228	30.6011	-0.728469	0.605963	NM_207066.2	30.9222	-0.713172	0.584276	TCONS_00066253	309.336	-0.728919	0.113291	same	V4 longer
abhd14b	ENSDART00000165067	191.876	1.02643	0.131338	XM_017356451.2	192.83	1.00416	0.124059	TCONS_00107425	196.667	1.05973	0.103587	same	same
abhd15a	ENSDART00000109990	388.644	0.170981	0.859074	XM_021466432.1	385.403	0.178016	0.828382	TCONS_00030271	395.657	0.219141	0.802877	Ens95 longer	same
abhd16a	ENSDART00000110606	539.628	0.0407434	0.970157	NM_001111178.1	541.05	0.0462747	0.956932	TCONS_00034244	553.348	0.100985	0.911481	same	same
abhd17aa	ENSDART00000129704	87.3792	0.449925	0.673964	NM_001089323.1	86.7409	0.439519	0.648275	TCONS_00051842	338.27	-0.660323	0.351518	same	V4 longer
abhd17ab	ENSDART00000147172	34.142	0.635288	0.740312	XM_021478400.1	1058.36	0.677855	0.178233	TCONS_00120671	1082.36	0.733183	0.139317	RefSeq longer	same
abhd17c	ENSDART00000081323	616.712	-0.100028	0.906367	NM_200157.1	539.556	-0.167248	0.810015	TCONS_00110994	629.878	-0.0439043	0.960766	same	same
abhd18	ENSDART00000168510	92.3772	-0.764342	0.450264	NM_001013347.2	50.8032	-0.852155	0.552268	TCONS_00026851	95.1044	-0.700293	0.505409	Ens95 longer	same
abhd2a	ENSDART00000035067	762.849	2.13245	1.86388e-07	NM_200914.1	762.517	2.1345	1.14641e-07	TCONS_00111074	3441.45	2.26935	4.72992e-07	same	V4 longer
abhd2b	ENSDART00000067327	40.8649	-2.32971	0.113467	NM_001079677.1	41.1884	-2.31627	0.111132	TCONS_00080334	42.2198	-2.25475	0.148622	same	same
abhd3	ENSDART00000023851	442.686	-0.387039	0.677391	NM_001004569.2	120.852	-0.12956	0.915137	TCONS_00052821	452.711	-0.327867	0.728665	Ens95 longer	same
abhd4	ENSDART00000169600	602.487	1.29048	0.00912002	NM_001017613.1	605.41	1.28056	0.00741341	TCONS_00051974	616.882	1.33017	0.00415565	same	same
LOC100329433	ENSDART00000160896	23.9232	1.11991	0.714952	XM_002665609.5	15.5071	2.12374	1	rna50488	15.8484	2.15384	0.489117	RefSeq longer	same
abhd8b	ENSDART00000110033	83.8116	0.142441	0.939661	XM_005155706.3	115.481	0.426731	0.636962	ENSDART00000110033	93.3246	0.320723	0.843738	same	same
abi1a	ENSDART00000131768	2478.51	1.98692	6.09881e-08	XM_005162489.4	970.341	2.13532	3.83483e-06	TCONS_00074395	2532.39	2.03325	1.75028e-09	Ens95 longer	V4 longer
abi1b	ENSDART00000091644	161.492	-1.24995	0.0754521	XM_005171176.4	161.481	-1.24653	0.0669141	TCONS_00052722	170.471	-1.14741	0.0875905	same	V4 longer
abi2b	ENSDART00000065471	125.007	-0.27647	0.78697	XM_005165772.4	1379.04	0.0451396	0.959251	TCONS_00105701	1407.45	0.0968623	0.917285	RefSeq longer	same
abi3a	ENSDART00000084284	101.426	-2.05438	0.00466037	NM_001076774.1	100.828	-2.10337	0.00305466	TCONS_00086085	104.488	-2.03271	0.00561518	same	same
abi3b	ENSDART00000092319	112.802	-0.16359	0.915559	XM_689325.6	112.818	-0.170669	0.89439	TCONS_00016739	115.553	-0.123964	0.937961	same	same
abi3bpb	ENSDART00000189359	803.59	-2.20785	1.4182e-05	NM_199859.1	805.453	-2.20349	1.43732e-05	TCONS_00067049	827.416	-2.15049	3.0351e-05	Ens95 longer	same
abl1	ENSDART00000148626	103.932	0.773877	0.519369	XM_005172047.4	134.907	0.65507	0.540717	TCONS_00101614	3440.81	0.950522	0.0852123	RefSeq longer	V4 longer
abl2	ENSDART00000164385	277.754	0.0730162	0.947334	XM_005166889.4	133.515	0.277769	0.764677	TCONS_00117599	297.864	0.113106	0.905726	Ens95 longer	same
ablim1a	ENSDART00000145705	118.28	-0.449495	0.747517	NM_001114316.1	132.533	-0.462304	0.700468	TCONS_00022662	135.293	-0.397892	0.77596	same	same
ablim1b	ENSDART00000153025	1273.86	-0.646607	0.220893	XM_009306613.3	1409.49	-0.653505	0.188808	TCONS_00015660	1495.57	-0.61219	0.191857	same	V4 longer
ablim2	ENSDART00000152879	416.001	2.06603	0.0106939	XM_009306727.3	1069.61	2.15301	0.000300922	rna35545	1131.05	2.16557	0.000320099	RefSeq longer	same
ablim3	ENSDART00000141157	216.316	-1.31595	0.0330823	XM_005173321.4	216.647	-1.27614	0.0359095	TCONS_00026371	223.406	-1.25878	0.0394196	same	same
abraa	ENSDART00000153468	22.24	-1.53791	0.0589717	XM_694448.8	8.02803	-2.09185	0.321736	ENSDART00000153468	22.5954	-1.53129	0.0675612	Ens95 longer	same
abrab	ENSDART00000187144	77.8886	-0.408962	0.800372	NM_001003986.1	4.51116	-1.81096	1	TCONS_00049353	78.3124	-0.361678	0.831463	Ens95 longer	same
abracl	ENSDART00000062931	965.762	1.00927	0.107497	NM_213642.2	964.332	1.02556	0.0877523	ENSDART00000062931	988.525	1.06883	0.0751093	same	same
abraxas1	ENSDART00000063621	100.51	-0.0523437	0.973251	XM_021468815.1	121.226	0.173761	0.850784	TCONS_00061433	126.568	0.195525	0.849607	Ens95 longer	same
abraxas2	ENSDART00000160281	65.1453	0.0937402	0.951316	XM_009293129.3	90.9412	0.0610913	0.95394	TCONS_00040339	173.533	-0.255254	0.797591	RefSeq longer	V4 longer
abt1	ENSDART00000064113	174.689	0.0691947	0.954075	NM_001020547.1	167.284	0.0380039	0.970551	TCONS_00120081	178.177	0.123934	0.907691	same	same
abtb1	ENSDART00000159670	325.644	0.25455	0.763943	XM_003199051.5	95.2202	0.476805	0.620512	TCONS_00117269	408.414	0.19772	0.815341	Ens95 longer	V4 longer
abtb2a	ENSDART00000083389	57.0711	-0.627755	0.490732	XM_682789.7	28.0818	0.137644	0.946014	TCONS_00113033	60.3828	-0.5795	0.523828	Ens95 longer	same
abtb2b	ENSDART00000089113	207.389	0.366869	0.641589	XM_001923151.6	209.65	0.36541	0.600812	TCONS_00078788	211.88	0.413539	0.568212	Ens95 longer	same
acaa1	ENSDART00000007997	166.107	0.0177158	0.992999	NM_001002207.1	166.134	0.0322367	0.983101	TCONS_00074908	170.238	0.0793068	0.964468	same	same
acaa2	ENSDART00000056767	454.709	0.00276708	0.999827	NM_213052.1	400.755	0.0384685	0.975009	TCONS_00119840	467.369	0.0601082	0.965686	same	same
acaca	ENSDART00000083079	532.831	-0.557859	0.319757	XM_017356109.2	530.028	-0.524474	0.324753	TCONS_00104414	546.189	-0.501505	0.359964	same	same
acacb	ENSDART00000148130	197.79	-0.114638	0.922688	XM_021476432.1	609.378	0.435207	0.424356	TCONS_00099111	621.168	0.478591	0.374199	RefSeq longer	V4 longer
acad8	ENSDART00000062569	138.855	-0.866998	0.188769	NM_201155.1	103.733	-0.820748	0.312256	TCONS_00027589	142.615	-0.802784	0.230655	Ens95 longer	same
acad9	ENSDART00000083010	158.394	0.376539	0.675803	NM_001045307.1	158.398	0.376473	0.637373	TCONS_00013563	461.353	0.32619	0.678724	same	V4 longer
acadl	ENSDART00000126978	669.014	0.146433	0.865473	NM_201181.2	670.686	0.149958	0.837697	TCONS_00042791	683.887	0.203254	0.789999	same	same
acadsb	ENSDART00000189407	570.786	0.241754	0.820112	XM_021480454.1	363.344	0.0206059	0.986252	ENSDART00000189407	94.6827	-0.265796	0.930811	Ens95 longer	same
acadvl	ENSDART00000131019	1051.16	0.39154	0.484638	NM_212611.1	548.547	0.637671	0.1736	TCONS_00111411	1240.98	0.387434	0.489466	Ens95 longer	V4 longer
acana	ENSDART00000003690	51.5544	-1.6596	0.0632671	XM_005166485.4	64.4207	-1.85448	0.0452472	TCONS_00113000	80.6997	-1.54309	0.0866637	RefSeq longer	same
acap1	ENSDART00000052902	671.941	1.97268	0.00104868	NM_001080579.1	672.425	1.99022	0.000906557	TCONS_00114706	841.887	1.99911	6.09837e-05	same	V4 longer
acap2	ENSDART00000191232	359.334	2.25568	3.03539e-05	NM_001102639.1	332.385	2.76058	1.08716e-05	rna57323	351.893	2.77538	4.72167e-07	RefSeq longer	same
acap3a	ENSDART00000139563	38.6401	0.145869	0.949385	XM_021470024.1	40.5784	0.313175	0.855583	TCONS_00073831	919.815	1.68999	0.000453071	same	V4 longer
acap3b	ENSDART00000162369	20.9338	-0.520321	0.785015	XM_017358180.2	43.5048	-0.425444	0.742372	TCONS_00012489	89.0975	-0.356756	0.748156	same	same
acat1	ENSDART00000170182	557.312	-0.0671651	0.945685	NM_001003746.1	514.819	-0.0593998	0.943867	ENSDART00000170182	569.43	-0.0106035	0.991091	Ens95 longer	same
acat2	ENSDART00000006778	99.6275	-1.47468	0.224079	NM_131370.2	99.997	-1.46941	0.207902	TCONS_00059137	102.699	-1.40582	0.265451	same	same
acbd3	ENSDART00000062525	769.2	0.326603	0.643159	NM_001328207.1	769.31	0.328274	0.598184	TCONS_00056613	786.161	0.382711	0.537045	same	same
acbd5a	ENSDART00000007373	87.375	-1.09534	0.103339	XM_005162509.4	87.3845	-1.06255	0.116255	TCONS_00076009	89.1152	-1.04106	0.122816	same	same
acbd5b	ENSDART00000140434	1.28262	-2.18227	1	XM_005171138.3	10.0285	0.782644	1	TCONS_00049902	10.0396	0.783428	0.866782	RefSeq longer	same
acbd6	ENSDART00000057642	261.672	0.133162	0.890583	NM_001025455.1	261.412	0.135668	0.867119	ENSDART00000057642	267.548	0.186954	0.833867	same	same
acbd7	ENSDART00000046209	174.864	-1.3975	0.135194	NM_001128768.2	175.601	-1.38638	0.127775	TCONS_00032786	180.964	-1.3237	0.170782	same	same
accs	ENSDART00000128591	127.533	-0.574318	0.551195	XM_005162977.4	126.942	-0.533525	0.551372	TCONS_00078097	130.954	-0.515666	0.608102	same	same
acd	ENSDART00000173709	235.915	0.326167	0.663408	XM_005168914.4	235.946	0.326346	0.622638	ENSDART00000173709	241.749	0.366817	0.58935	same	same
ace	ENSDART00000114637	1932.03	3.28254	2.23942e-12	XM_689244.9	1929.29	3.28077	1.19003e-12	TCONS_00014654	1968.65	3.27534	6.28643e-13	same	same
ace2	ENSDART00000003712	40.9633	-1.07358	0.580551	NM_001007297.1	40.0136	-1.03612	0.561008	TCONS_00013718	41.9879	-1.0893	0.537554	same	V4 longer
acer1	ENSDART00000136911	40.3539	0.591229	0.706351	XM_005166840.4	41.9668	0.308255	0.834526	TCONS_00120724	51.4083	0.225824	0.896516	RefSeq longer	V4 longer
ache	ENSDART00000052989	271.58	-1.88703	0.00710208	NM_131846.2	272.336	-1.88239	0.00666235	TCONS_00114987	279.434	-1.81598	0.0104774	same	same
acin1b	ENSDART00000034218	1524.7	0.176733	0.803555	XM_021477409.1	1520.43	0.16479	0.791554	ENSDART00000034218	1561.51	0.225256	0.72197	Ens95 longer	same
ackr3a	ENSDART00000090414	158.5	2.15693	0.00286873	XM_005167521.4	157.865	2.15127	0.00291022	TCONS_00125916	161.301	2.18056	0.00327202	Ens95 longer	same
ackr3b	ENSDART00000063665	5592.28	1.95258	1.81752e-07	NM_001083832.1	5594.63	1.95564	8.10413e-08	TCONS_00108562	5714.05	2.00183	2.08438e-08	same	same
ackr4b	ENSDART00000058703	113.952	0.599749	0.538853	XM_005162609.4	125.255	0.589127	0.500554	TCONS_00074582	127.69	0.643048	0.478894	same	same
aclya	ENSDART00000164663	531.069	0.367459	0.623729	NM_001002649.1	491.421	0.377066	0.586814	TCONS_00081974	541.198	0.413004	0.535371	Ens95 longer	same
aclyb	ENSDART00000078037	18.6874	-1.60328	0.0825928	XM_001334159.5	17.0848	-1.69104	0.0608973	TCONS_00017089	19.6825	-1.5141	0.1153	Ens95 longer	same
acmsd	ENSDART00000143657	17.674	-0.331166	0.905125	NM_001089494.1	17.6839	-0.330404	0.890697	TCONS_00125854	18.3502	-0.279609	0.924901	same	same
aco2	ENSDART00000149180	1544.9	-0.416452	0.621669	NM_198908.1	1548.04	-0.411972	0.588591	TCONS_00017308	1593.47	-0.34876	0.689442	same	V4 longer
acot11a	ENSDART00000081058	21.5792	0.478061	0.827931	XM_005171174.4	21.5787	0.539609	0.777554	TCONS_00049959	22.5809	0.482303	0.829955	same	V4 longer
acot11b	ENSDART00000122730	42.5547	1.48585	0.225859	NM_001037572.1	135.497	2.40814	0.000315992	TCONS_00120563	147.338	2.42191	0.000242305	same	same
ACOT12	ENSDART00000076731	193.195	0.174774	0.901702	XM_003199391.5	2.89475	-2.94209	1	ENSDART00000076731	196.698	0.222892	0.868687	Ens95 longer	same
acot13	ENSDART00000088401	158.744	0.427901	0.701791	NM_001080803.1	158.735	0.419977	0.676074	ENSDART00000088401	113.002	0.321548	0.795111	same	same
acot14	ENSDART00000133929	87.4585	-0.906761	0.253067	NM_001030110.2	87.1202	-0.912251	0.225167	TCONS_00088898	88.5478	-0.867959	0.274721	same	same
acot15	ENSDART00000041965	170.331	-0.295919	0.760173	NM_001025487.2	172.919	-0.285318	0.734592	TCONS_00088904	176.368	-0.234379	0.810184	same	same
acot16	ENSDART00000100714	8.71229	-0.70416	0.833117	XM_021475271.1	8.71588	-0.529584	1	TCONS_00088908	9.04928	-0.584683	0.872904	Ens95 longer	same
acot17	ENSDART00000066943	8.06873	-1.05863	0.605311	XM_021475137.1	3.54103	-1.75433	1	TCONS_00088913	8.08013	-1.00176	0.644244	Ens95 longer	same
acot18	ENSDART00000132864	93.8497	-0.186593	0.869108	NM_001201537.1	93.8472	-0.216732	0.820698	TCONS_00088918	95.5967	-0.175052	0.876916	same	same
acot19	ENSDART00000098896	12.2867	0.343388	0.92812	NM_001007419.2	21.3035	0.0897921	0.970116	TCONS_00080839	21.6636	0.207975	0.940411	same	same
acot20	ENSDART00000062338	31.3022	0.470147	0.781966	XM_691619.6	125.315	-0.796987	0.31871	TCONS_00056535	128.077	-0.73753	0.394031	RefSeq longer	same
acot22	ENSDART00000081918	0	-6.50543	0.0106875	NM_001256219.1	0	-6.50518	1	ENSDART00000081918	0	-6.47564	0.0202805	same	same
acot8	ENSDART00000027386	91.7786	1.12931	0.360631	NM_001006072.1	91.765	1.12892	0.335976	TCONS_00010070	92.8673	1.1778	0.338234	same	same
acot9.1	ENSDART00000030592	315.801	0.529504	0.455613	XM_005162711.4	304.82	0.515029	0.439026	ENSDART00000030592	321.737	0.58214	0.36222	Ens95 longer	same
acot9.2	ENSDART00000058948	55.7686	1.67873	0.0976414	NM_001037399.1	55.4415	1.67016	0.0956033	TCONS_00076652	56.8185	1.75786	0.0880943	Ens95 longer	same
acox1	ENSDART00000049226	516.577	-0.133693	0.873493	XM_005166165.4	518.251	-0.128256	0.855907	TCONS_00106189	528.944	-0.0767818	0.928058	Ens95 longer	same
acp1	ENSDART00000082647	430.644	0.70784	0.214275	NM_001014302.2	445.185	0.710621	0.179815	TCONS_00071322	456.809	0.764657	0.146565	same	same
acp5b	ENSDART00000165399	52.7341	0.506049	0.81313	NM_001002452.1	53.0759	0.516061	0.784416	TCONS_00077114	54.4341	0.563039	0.797263	same	same
acp6	ENSDART00000101097	111.911	1.06209	0.122497	NM_001110380.1	111.924	1.06232	0.109466	TCONS_00123752	114.331	1.11745	0.0967549	same	same
acsbg2	ENSDART00000124809	6578.44	2.37665	1.19808e-06	NM_001126379.1	6578.78	2.37962	8.52285e-07	TCONS_00117807	6702.24	2.42621	2.00347e-07	same	V4 longer
ACSF3	ENSDART00000082780	100.373	0.392028	0.739405	XM_021477983.1	96.1907	0.349272	0.750843	ENSDART00000082780	102.127	0.433509	0.70305	Ens95 longer	same
acsl1a	ENSDART00000039917	282.235	-0.671247	0.274836	XM_005168349.4	358.587	-0.538977	0.393527	TCONS_00003581	366.461	-0.488237	0.476735	RefSeq longer	same
acsl1b	ENSDART00000130801	423.577	0.124534	0.894623	XM_005169565.4	130.977	0.0681631	0.948967	TCONS_00024859	431.28	0.17027	0.838692	Ens95 longer	same
acsl3b	ENSDART00000184199	1246.88	0.0158239	0.988289	XM_005163548.4	1233.48	0.0272779	0.971438	TCONS_00051766	1272.58	0.0698907	0.929419	Ens95 longer	same
acsl4a	ENSDART00000006489	777.743	0.377856	0.684877	NM_200649.1	777.163	0.378924	0.645789	TCONS_00023960	792.405	0.432236	0.609392	same	same
acsl4b	ENSDART00000191869	662.7	0.582356	0.357656	NM_001002050.2	1001.43	0.405609	0.530107	ENSDART00000191869	654.891	0.629059	0.281959	Ens95 longer	same
acsl5	ENSDART00000148603	21.2859	0.0228251	0.993796	NM_001004599.2	8.72439	-0.450068	1	TCONS_00017774	21.6408	0.0891601	0.974992	Ens95 longer	same
acsm3	ENSDART00000041806	112.34	-0.358854	0.761463	XM_021478255.1	112.641	-0.358131	0.732485	TCONS_00054633	120.559	-0.315699	0.785809	same	V4 longer
acss2	ENSDART00000125122	409.682	-0.58888	0.370315	NM_001328353.1	405.289	-0.561523	0.37385	TCONS_00070116	420.312	-0.52493	0.428829	Ens95 longer	same
acss3	ENSDART00000140400	212.788	-0.936404	0.183206	XM_689284.9	74.1057	-0.595214	0.480144	TCONS_00088820	150.638	-0.749598	0.339591	Ens95 longer	same
acta1a	ENSDART00000052838	632.181	0.164225	0.888782	NM_001017750.1	631.146	0.166263	0.864562	TCONS_00002331	642.748	0.204983	0.850562	same	same
acta1b	ENSDART00000058629	121.482	-0.726069	0.448296	NM_214784.2	126.659	-0.709463	0.431252	TCONS_00019661	124.569	-0.659511	0.499807	same	same
acta2	ENSDART00000177923	416.392	0.486495	0.586513	NM_212620.2	411.073	0.50149	0.544261	TCONS_00014996	427.358	0.54255	0.524918	Ens95 longer	same
actc1a	ENSDART00000178308	204.098	-2.95053	9.03152e-13	NM_001001409.2	204.122	-2.93711	1.15855e-12	TCONS_00059071	170.421	-3.18346	1.24586e-11	Ens95 longer	same
actc1b	ENSDART00000158825	635.532	-1.94222	6.38952e-05	NM_131591.1	631.784	-1.94233	5.61258e-05	TCONS_00038810	650.697	-1.88377	8.45683e-05	Ens95 longer	same
actc1c	ENSDART00000109883	91.5295	-0.783848	0.656853	XM_009297927.3	93.125	-0.782487	0.622005	rna61447	94.5508	-0.730814	0.682764	same	same
actl6a	ENSDART00000104303	773.708	-0.148224	0.878813	XM_005165917.4	774.189	-0.148475	0.856371	TCONS_00106447	792.634	-0.0882046	0.931789	same	same
actl6b	ENSDART00000148532	3.20858	-3.10879	0.135244	XM_005170576.4	4.17736	-2.79507	0.141771	TCONS_00074047	4.18236	-2.76332	0.181521	Ens95 longer	same
actn2b	ENSDART00000133327	41.617	-1.31745	0.0828033	NM_001037573.1	41.6171	-1.31297	0.0769927	TCONS_00039673	64.2418	-2.03415	0.00463495	Ens95 longer	V4 longer
actn3a	ENSDART00000005682	30.0486	-1.52517	0.300716	NM_131522.2	30.0555	-1.51953	0.283235	TCONS_00061877	30.7347	-1.46759	0.344775	same	same
actn3b	ENSDART00000189886	78.7108	-0.868423	0.191913	NM_205544.2	69.3337	-0.879231	0.159301	ENSDART00000189886	80.4373	-0.809486	0.225308	Ens95 longer	same
actn4	ENSDART00000182528	555.327	1.46485	0.000645731	XM_021481334.1	2858	1.81233	8.08468e-05	TCONS_00028703	2910.11	1.86256	2.31173e-05	RefSeq longer	same
actr1	ENSDART00000010420	2272.27	0.480807	0.409118	NM_213372.1	2272.08	0.482136	0.361122	TCONS_00007698	2319.82	0.533901	0.294355	same	same
actr10	ENSDART00000099338	327.756	-0.000114109	0.999827	NM_200170.1	327.822	0.00143647	0.999623	TCONS_00057633	335.343	0.0611389	0.956761	same	same
actr2a	ENSDART00000074294	2747.34	1.23893	0.00234322	XM_021470433.1	2775.02	1.25061	0.00145747	TCONS_00002177	2840.84	1.30518	0.000520865	same	V4 longer
actr2b	ENSDART00000144931	22.2426	-0.33766	0.858984	XM_021480582.1	58.4297	0.432703	0.722528	TCONS_00021004	59.4753	0.467383	0.72904	RefSeq longer	same
actr3b	ENSDART00000167570	2.24459	-1.37348	1	NM_001089556.1	3.53535	-1.40615	1	TCONS_00076104	29.3264	-0.696848	0.657121	same	same
actr5	ENSDART00000170312	119.735	0.540079	0.586469	NM_213488.1	119.718	0.557144	0.531542	TCONS_00122432	121.839	0.580517	0.542077	same	same
actr8	ENSDART00000167839	263.909	0.523102	0.454077	NM_001001400.1	263.578	0.523847	0.409071	TCONS_00122335	268.479	0.571424	0.366948	same	same
acvr1ba	ENSDART00000023094	1674.56	-0.0613849	0.949746	XM_005162224.4	1673.58	-0.0623136	0.938286	TCONS_00073275	1713.89	-0.00403037	0.996306	same	same
ACVR1C	ENSDART00000129308	11.9523	-2.18427	0.0742467	XM_021478827.1	11.6307	-2.22344	0.0692917	ENSDART00000129308	11.9685	-2.17496	0.0871133	Ens95 longer	same
acvr1l	ENSDART00000017977	538.327	0.0674605	0.954075	XM_021478751.1	539.13	0.0823128	0.929924	TCONS_00051474	1214.97	0.267074	0.638451	same	V4 longer
acvr2aa	ENSDART00000129522	2018.23	0.169351	0.80694	XM_005167561.4	2019.14	0.171559	0.771199	TCONS_00125971	2066.73	0.223133	0.708052	same	same
acvrl1	ENSDART00000043462	7462.07	4.60267	5.79719e-22	XM_009296804.3	7459.44	4.60229	1.9133e-22	TCONS_00073278	7597.53	4.64482	1.00988e-23	same	same
acy1	ENSDART00000010824	236.734	-0.112211	0.920821	XM_001922554.6	13.8819	1.72488	1	TCONS_00069503	253.251	0.00865722	0.993927	RefSeq longer	same
acy1	ENSDART00000056151				XM_009296511.3	233.23	-0.0628452	0.951196	TCONS_00069505	253.251	0.00865722	0.993927	same	same
acyp1	ENSDART00000150024	160.343	-0.0118209	0.994302	NM_001122849.1	118.702	0.214715	0.859393	TCONS_00040930	163.153	0.0401254	0.979108	Ens95 longer	same
ada	ENSDART00000019519	154.012	-0.10338	0.947009	NM_001002646.1	153.695	-0.10646	0.933493	TCONS_00073090	156.48	-0.0572761	0.971223	same	same
ada2a	ENSDART00000073416	253.954	0.129088	0.900699	NM_001033717.2	254.014	0.131447	0.878912	TCONS_00078391	259.816	0.158235	0.871491	same	V4 longer
ada2b	ENSDART00000144048	10.2893	-1.70567	0.388487	XM_682627.4	5.14323	-1.75995	1	ENSDART00000144048	10.9515	-1.58954	0.463316	Ens95 longer	same
adad1	ENSDART00000127477	17.7762	-0.427708	0.882187	NM_001290213.1	17.459	0.232068	0.938692	TCONS_00023103	18.121	-0.362078	0.905834	Ens95 longer	same
adad2	ENSDART00000173920	11.9676	0.510709	0.890625	XM_682091.8	11.9645	0.403901	1	TCONS_00114917	12.3055	0.549426	0.885912	same	same
adal	ENSDART00000067288	84.9262	0.367669	0.80791	NM_001033744.1	84.9046	0.38154	0.773965	TCONS_00080416	86.0105	0.412351	0.782223	same	same
adam10a	ENSDART00000173954	5478.93	1.58707	8.22912e-06	XM_005168896.4	5396.68	1.60758	3.59458e-06	ENSDART00000173954	5591.84	1.63868	7.25305e-07	Ens95 longer	same
adam11	ENSDART00000110503	10.3145	-1.51056	0.243914	XM_021480273.1	8.03798	-1.80552	0.363203	TCONS_00017081	136.785	-1.88356	0.00633393	Ens95 longer	V4 longer
adam12	ENSDART00000108736	616.921	2.01808	0.000744712	XM_017351825.2	617.737	1.88572	0.00107196	TCONS_00038007	729.013	1.89357	0.000789232	Ens95 longer	V4 longer
adam15	ENSDART00000127753	470.171	1.64309	0.00157609	XM_001335282.7	288.037	1.86394	0.0078701	TCONS_00035213	1543.92	1.55706	1.22684e-05	Ens95 longer	V4 longer
adam17a	ENSDART00000063437	1254.49	1.04974	0.0587206	NM_199673.1	1252.1	1.05703	0.0459932	TCONS_00040435	1274.63	1.09618	0.0330313	same	same
adam17b	ENSDART00000153339	64.582	0.861483	0.513801	XM_021468637.1	78.121	0.798086	0.503356	TCONS_00056564	672.74	0.449992	0.387899	RefSeq longer	Ens95/RefSeq longer
adam19a	ENSDART00000083255	187.028	-0.84063	0.139014	XM_005172361.4	201.245	-0.770578	0.159883	TCONS_00113467	217.05	-0.729885	0.207785	Ens95 longer	same
adam19b	ENSDART00000097214	51.7684	-1.86928	0.0456318	XM_694823.9	50.1797	-1.8795	0.0487124	ENSDART00000097214	53.1438	-1.82364	0.0593473	same	same
adam22	ENSDART00000125590	108.054	-2.0357	0.0305174	XM_021467004.1	54.3812	-1.62743	0.161875	TCONS_00033436	608.629	-2.00319	0.0137474	RefSeq longer	V4 longer
adam23a	ENSDART00000150036	236.403	-1.4784	0.015371	XM_001923227.7	365.472	-1.81407	0.00371649	TCONS_00108390	381.756	-1.72587	0.00573405	RefSeq longer	same
adam28	ENSDART00000180251	70.4307	-0.640297	0.668736	NM_001076718.1	5.79667	-1.73923	1	TCONS_00099624	129.587	-0.505144	0.731408	same	same
adam8a	ENSDART00000001678	721.723	1.97719	0.00377136	NM_200637.1	720.658	1.99056	0.00301751	ENSDART00000001678	734.037	2.0208	0.00287672	same	same
adam8b	ENSDART00000066471	255.437	1.83807	0.0172662	XM_003199573.5	129.931	1.51174	0.126277	ENSDART00000066471	262.256	1.87481	0.0178595	Ens95 longer	same
adamts10	ENSDART00000113910	38.067	0.595613	0.741198	XM_005166873.4	962.516	1.672	0.000802813	TCONS_00120730	981.11	1.71768	0.000532002	RefSeq longer	same
adamts12	ENSDART00000097221	64.4718	-1.48801	0.00712147	XM_021476396.1	25.8064	-0.918012	0.362401	TCONS_00102022	65.8569	-1.45904	0.00980159	Ens95 longer	same
adamts13	ENSDART00000175207	8.37346	-1.30247	0.604576	XM_002663221.6	8.37178	-1.13506	1	TCONS_00121897	8.38664	-1.25652	0.642801	Ens95 longer	same
adamts15b	ENSDART00000062378	46.5014	-1.36853	0.133252	XM_001341842.5	23.9002	-1.16522	0.356653	TCONS_00027535	104.306	-3.40616	2.87665e-08	RefSeq longer	V4 longer
adamts15b	ENSDART00000157185				XM_001341899.5	58.2618	-4.06852	3.4587e-06	TCONS_00029825	104.306	-3.40616	2.87665e-08	RefSeq longer	V4 longer
adamts18	ENSDART00000004120	124.975	-1.92061	0.000135122	XM_009303403.3	19.6542	-1.79428	0.041467	TCONS_00112853	129.353	-1.85877	0.000339097	Ens95 longer	V4 longer
adamts2	ENSDART00000162873	64.0611	-1.32227	0.121652	XM_695292.6	64.0878	-1.25907	0.141376	rna54768	65.7727	-1.22645	0.182336	Ens95 longer	Ens95/RefSeq longer
adamtsl2	ENSDART00000108729	61.5213	-3.14597	0.000657433	XM_021476679.1	10.3307	-1.67436	0.353678	TCONS_00104779	62.906	-3.1132	0.00108655	Ens95 longer	same
adamtsl3	ENSDART00000052750	57.8217	-1.25088	0.215258	XM_003198899.5	51.3893	-1.14981	0.331733	ENSDART00000052750	58.5428	-1.21749	0.238659	Ens95 longer	same
adamtsl5	ENSDART00000073910	38.018	-1.10715	0.244677	XM_005166491.4	21.2421	-1.33446	0.217974	TCONS_00116120	42.5948	-1.24649	0.18982	Ens95 longer	same
adamtsl7	ENSDART00000148327	30.0024	-0.345256	0.829703	XM_021476316.1	28.7198	-0.197568	0.903481	TCONS_00003841	30.6889	-0.289561	0.864819	Ens95 longer	same
adar	ENSDART00000146708	123.65	-0.382155	0.70161	XM_009292255.3	416.66	-0.333364	0.610019	TCONS_00032474	425.927	-0.277558	0.705476	RefSeq longer	same
adarb1a	ENSDART00000044574	1429.47	1.82895	4.03841e-05	XM_021469375.1	1431.77	1.83705	2.47435e-05	TCONS_00068348	1458.6	1.8804	7.12231e-06	same	same
adarb1b	ENSDART00000145616	31.8861	-0.37488	0.825712	XM_021479018.1	95.4596	-0.0490385	0.964075	ENSDART00000145616	32.258	-0.325696	0.85583	RefSeq longer	Ens95/RefSeq longer
adat1	ENSDART00000087410	43.1041	-0.340281	0.834691	NM_001082887.1	50.1927	-0.251062	0.866546	TCONS_00079218	72.5	-0.583315	0.671001	same	same
adat2	ENSDART00000152885	78.3756	-0.300562	0.772408	XM_005160618.4	62.5368	-0.451541	0.60554	TCONS_00059495	81.0638	-0.2776	0.788118	RefSeq longer	same
adat3	ENSDART00000008275	53.3039	-0.138921	0.944494	NM_001005300.3	52.9769	-0.139894	0.932494	TCONS_00126729	53.6967	-0.106723	0.959028	same	same
adck1	ENSDART00000190146	31.9691	-0.0997966	0.964524	NM_001123049.1	31.964	-0.0299226	0.988289	TCONS_00039618	32.6572	-0.0430763	0.985505	Ens95 longer	same
adck2	ENSDART00000113032	26.4369	-0.932059	0.494785	XM_695757.8	26.1114	-0.968378	0.447565	TCONS_00077735	38.4522	-0.607097	0.675867	same	V4 longer
adck5	ENSDART00000145380	89.8817	-0.401716	0.707375	XM_009294096.3	89.8921	-0.40523	0.672137	TCONS_00045645	150.464	-0.227052	0.82768	Ens95 longer	V4 longer
adcy1a	ENSDART00000100098	15.8294	-1.11274	0.529534	NM_001168349.1	15.8324	-1.07105	0.521935	TCONS_00058031	33.9862	-0.227108	0.929925	same	V4 longer
adcy1b	ENSDART00000131177	8.09108	-1.56475	0.510039	NM_001168350.1	8.09102	-1.56462	0.481763	TCONS_00052244	35.1517	-3.22877	4.12394e-05	same	same
adcy2b	ENSDART00000046166	3487.45	4.25013	1.82157e-15	XM_005170038.4	3464.36	4.29484	1.27334e-15	TCONS_00048689	3545.79	4.29228	6.26816e-17	Ens95 longer	same
adcy5	ENSDART00000124333	29.0544	-0.96814	0.392236	NM_001171585.2	29.0565	-0.968125	0.36464	TCONS_00126641	116.257	-1.32163	0.00840735	same	V4 longer
adcy6a	ENSDART00000087654	522.786	1.524	0.00344555	XM_017353730.2	973.795	0.840859	0.0482417	ENSDART00000087654	531.263	1.56854	0.00158283	RefSeq longer	Ens95/RefSeq longer
adcy7	ENSDART00000173552	778.492	0.822126	0.137291	XM_009303322.3	113.462	0.643591	0.530907	TCONS_00115578	792.846	0.869994	0.0878497	Ens95 longer	same
adcyap1a	ENSDART00000012070	47.0431	-0.793095	0.617891	NM_001328496.1	47.3855	-0.777222	0.595339	TCONS_00113756	48.4044	-0.720135	0.664064	same	same
adcyap1b	ENSDART00000190723	279.035	-2.42853	0.000169737	NM_001272081.1	272.91	-2.44807	0.000174601	TCONS_00053698	285.262	-2.36646	0.000220722	Ens95 longer	same
adcyap1r1b	ENSDART00000156211	125.406	-3.03502	8.56072e-07	XM_677888.7	2.89475	-3.75336	0.00696331	TCONS_00109270	33.2594	-3.51448	2.14603e-08	same	V4 longer
adcyap1r1a	ENSDART00000160900				NM_001013444.2	7.4275	-0.521525	1	TCONS_00051925	124.951	-2.9609	1.98225e-06	Ens95 longer	V4 longer
add2	ENSDART00000148297	106.771	-2.00016	0.015769	XM_009301249.3	62.1498	-1.01526	0.272762	ENSDART00000148297	125.006	-1.79963	0.0358207	Ens95 longer	same
add3a	ENSDART00000040538	2634.28	0.712925	0.175664	XM_005161804.4	4752.81	0.75788	0.109466	TCONS_00067127	4850.33	0.797324	0.0846843	RefSeq longer	same
add3b	ENSDART00000078703	14.8501	-2.39325	0.0243473	XM_005158673.4	14.8463	-2.42313	0.0198831	TCONS_00039697	35.9119	-2.0705	0.0256378	RefSeq longer	V4 longer
adgb	ENSDART00000021575	32.586	-1.79432	0.0216111	XM_009294780.3	32.2709	-1.77943	0.0258524	TCONS_00059187	32.9549	-1.75091	0.0292005	same	same
adgra1a	ENSDART00000153212	191.047	-0.0860276	0.962238	XM_021480357.1	69.0908	-0.505777	0.77169	TCONS_00015639	227.864	0.114372	0.938619	Ens95 longer	same
adgrb1a	ENSDART00000112003	388.446	-0.766232	0.343453	XM_009292551.3	332.88	-0.850361	0.24392	TCONS_00033185	406.824	-0.671161	0.407213	Ens95 longer	same
adgrb1b	ENSDART00000143118	203.179	-1.66576	0.0124721	XR_658929.2	204.503	-1.68245	0.0096437	TCONS_00047074	209.301	-1.62546	0.014119	RefSeq longer	Ens95/RefSeq longer
adgrb3	ENSDART00000111080	49.3164	-1.81914	0.0137857	XM_005157032.4	111.398	-2.19228	0.00405486	TCONS_00020374	131.924	-1.93668	0.00761243	RefSeq longer	same
adgrd1	ENSDART00000134073	16.1016	-1.55061	0.433274	XM_021478337.1	20.6287	-1.22093	0.220798	TCONS_00121800	33.5611	-1.23299	0.190882	Ens95 longer	same
adgre10	ENSDART00000148075	7507.73	1.24702	0.644503	XM_021478071.1	1861.66	1.36454	0.593685	TCONS_00002492	164.229	-0.922175	0.583836	Ens95 longer	same
adgre14	ENSDART00000078485	3.20656	-1.27458	0.780953	XM_021474744.1	4.17878	-1.11418	1	TCONS_00083663	2.89168	-1.29992	0.796021	RefSeq longer	Ens95/RefSeq longer
adgre5b.2	ENSDART00000161039	12.585	-0.576097	0.823084	XM_005160221.4	16.4497	-0.285769	0.907862	TCONS_00005471	18.0941	-0.0780239	0.980938	RefSeq longer	V4 longer
adgre5b.3	ENSDART00000167777				XM_005160218.4	42.2534	-0.19615	0.875234	TCONS_00005464	380.266	0.270801	0.748852	Ens95 longer	same
LOC103909395	ENSDART00000152386	0.96399	-2.59378	1	XM_021478063.1	10.3538	0.301153	1	rna2184	0	-4.8596	1	RefSeq longer	same
adgrf3a	ENSDART00000156454	7.39852	-2.23578	0.117972	XM_021467280.1	7.40025	-2.27502	0.102621	TCONS_00036849	7.41107	-2.23544	0.137809	Ens95 longer	same
adgrf3b	ENSDART00000137690	26.4437	-1.55895	0.290909	XM_688747.5	27.3981	-1.67174	0.194657	ENSDART00000137690	27.1306	-1.55304	0.280026	Ens95 longer	same
adgrf6	ENSDART00000142444	74.7228	0.0420978	0.984268	XM_017352625.2	136.406	-0.350871	0.627407	ENSDART00000142444	115.584	-0.262557	0.772214	Ens95 longer	same
adgrf8	ENSDART00000153072	24.1544	-1.11405	0.614037	XM_021468539.1	28.9617	-1.46571	0.404305	TCONS_00059417	30.297	-1.44301	0.463174	RefSeq longer	same
adgrg1	ENSDART00000162400	736.574	0.331224	0.62103	XM_005166389.4	486.327	0.0202317	0.982968	ENSDART00000162400	760.615	0.385112	0.515898	Ens95 longer	same
adgrg1	ENSDART00000173556		0.331224	0.62103	XM_005166398.4	221.026	1.3691	0.0137093	ENSDART00000173556	760.615	0.385112	0.515898	same	same
adgrg11	ENSDART00000060710	3.87215	-2.4607	0.380699	XM_017352711.2	10.6217	-1.16923	0.623524	TCONS_00057312	15.1394	-1.98041	0.28133	RefSeq longer	V4 longer
adgrg3	ENSDART00000114592	145.959	-0.0343295	0.98861	XM_021478015.1	72.659	0.244936	0.895425	TCONS_00113529	150.717	0.0229378	0.99116	Ens95 longer	same
adgrg4a	ENSDART00000173034	29.4429	0.702594	0.783391	XM_021481193.1	23.939	1.00001	0.721716	ENSDART00000173034	29.8029	0.744346	0.777267	Ens95 longer	same
adgrg4b	ENSDART00000131482	3.87962	-1.54629	0.597506	XM_021479351.1	12.9016	-0.870835	0.642704	TCONS_00006898	13.5692	-0.799744	0.710253	RefSeq longer	same
adgrl2a	ENSDART00000171813	397.329	-2.32173	1.44915e-06	XM_005172842.4	400.61	-2.31961	1.51364e-06	TCONS_00010463	407.623	-2.26541	2.36972e-06	Ens95 longer	V4 longer
adgrl2b.1	ENSDART00000086761	4.85681	-0.996663	0.792902	XM_021466648.1	11.6076	-1.54762	0.230876	ENSDART00000086761	4.86358	2.91478	1	same	same
adgrl3.1	ENSDART00000144208	1161.9	0.797122	0.349179	XM_005170940.4	1227.98	0.834942	0.26304	TCONS_00003907	1259.42	0.8931	0.237562	same	same
adgrl4	ENSDART00000009859	3901.88	6.87587	1.20041e-34	NM_213367.2	3885.79	7.00202	9.02802e-31	TCONS_00012674	3970.36	6.94126	5.3339e-38	same	same
adgrv1	ENSDART00000008043	219.547	-2.09172	3.35063e-05	NM_001001845.2	217.358	-2.1357	2.02061e-05	TCONS_00100791	224.737	-2.06477	3.9464e-05	same	V4 longer
adh5	ENSDART00000108825	3967.43	0.921984	0.0657728	NM_131849.2	3958.23	0.925087	0.0512957	TCONS_00026613	4041.81	0.968099	0.0380419	same	same
adhfe1	ENSDART00000075551	51.5816	-0.938125	0.330018	NM_207086.1	51.575	-0.93816	0.303384	TCONS_00054436	52.6247	-0.891933	0.370689	same	same
adi1	ENSDART00000025229	631.863	0.312952	0.758352	NM_199668.1	628.573	0.310918	0.726866	TCONS_00038641	644.082	0.364169	0.697797	same	same
adipoqa	ENSDART00000089749				XM_017353972.2	12.5363	-0.181733	1	TCONS_00075124	4.49817	0.62483	1	RefSeq longer	V4 longer
adipoqb	ENSDART00000158216	5.17188	0.192961	0.96615	NM_001045425.2	5.17188	0.192821	1	TCONS_00052398	9.37923	-0.634926	0.820392	same	V4 longer
adipor1a	ENSDART00000082761	918.281	0.0261526	0.983083	NM_001327754.1	887.007	0.0297112	0.974282	TCONS_00011226	942.51	0.0858594	0.929171	Ens95 longer	same
adipor1b	ENSDART00000062682	376.173	0.108773	0.914791	NM_213500.1	376.245	0.110252	0.895847	TCONS_00118568	384.15	0.166556	0.851409	same	same
adipor2	ENSDART00000182726	6694.25	1.79255	0.000230853	NM_001025506.2	2578.78	1.61316	0.000220318	TCONS_00088051	6660.36	1.8758	7.15595e-05	Ens95 longer	Ens95/RefSeq longer
adka	ENSDART00000159585	637.958	0.303003	0.689387	NM_001272084.1	632.937	0.311734	0.642563	TCONS_00021759	652.793	0.354257	0.614581	Ens95 longer	same
adkb	ENSDART00000157464	262.274	-0.151287	0.885354	NM_198802.1	253.588	-0.178878	0.841426	ENSDART00000157464	115.957	0.0472334	0.980623	Ens95 longer	same
adm2a	ENSDART00000067193	6.43537	-1.70674	0.465766	NM_001130135.1	6.43578	-1.70645	1	TCONS_00093488	159.07	-0.171915	0.934342	same	V4 longer
adm2b	ENSDART00000132611	1.93405	-1.50844	1	XM_009293424.3	6.11478	-0.404788	1	TCONS_00043509	6.12476	-0.344352	0.952521	RefSeq longer	same
adma	ENSDART00000155954	1203.08	3.41392	1.97617e-08	NM_001326709.1	1252.24	3.43119	2.12709e-08	TCONS_00116663	1222.53	3.45554	9.20354e-09	same	same
admb	ENSDART00000100100	41.8479	-2.07579	0.00940836	XM_693535.7	41.855	-2.09892	0.00816013	TCONS_00043873	43.5276	-2.02115	0.0138362	same	same
admp	ENSDART00000037557	15.1603	-0.00456754	0.999827	NM_131876.2	16.4857	0.583599	1	TCONS_00055020	15.1824	0.027753	0.994075	Ens95 longer	same
adnp2a	ENSDART00000188587	344.461	0.444853	0.5002	NM_001098265.1	324.49	0.48178	0.423668	TCONS_00034999	351.41	0.497648	0.392458	Ens95 longer	same
adnp2b	ENSDART00000038942	1039.92	0.113771	0.889596	XM_005170053.4	1136.23	0.11954	0.851829	TCONS_00045992	1160.71	0.168489	0.802263	same	same
adnpa	ENSDART00000089120	1174.78	0.0337931	0.977191	NM_001080015.2	1236.7	0.0166791	0.985879	TCONS_00011308	1204.66	0.0920967	0.928229	same	same
adnpb	ENSDART00000176404	404.457	-0.740673	0.236556	XM_009296776.3	391.281	-0.780264	0.211276	TCONS_00070579	414.762	-0.684254	0.274151	Ens95 longer	same
adoa	ENSDART00000062858	212.21	-0.138107	0.924965	NM_001008634.1	212.546	-0.135836	0.911435	TCONS_00014714	217.378	-0.0789729	0.959598	same	same
adob	ENSDART00000075619	141.032	-0.257371	0.81488	NM_213193.1	141.387	-0.253617	0.79202	TCONS_00038304	145.123	-0.195551	0.86767	same	same
adora2aa	ENSDART00000193749	353.557	2.23841	0.000206743	XM_005167176.4	266.59	2.83055	1.73364e-06	ENSDART00000193749	358.874	2.25183	0.000143274	Ens95 longer	same
adora2ab	ENSDART00000140206	17.8091	0.0864326	0.986229	XM_005161098.4	32.3238	-0.354195	0.845246	TCONS_00060991	1247.55	3.48837	3.53667e-11	RefSeq longer	Ens95/RefSeq longer
adora2b	ENSDART00000144469	15.8026	-0.654899	0.704901	XM_005168628.4	67.7299	0.311236	0.782485	TCONS_00104605	625.707	1.03131	0.0169631	RefSeq longer	V4 longer
adpgk	ENSDART00000143721	23.5241	-1.36886	0.201257	XM_005162956.4	12.565	-2.04047	0.0377908	TCONS_00079574	160.708	-0.340268	0.710583	Ens95 longer	V4 longer
adpgk2	ENSDART00000091159	37.1363	-0.00122375	0.999827	XM_689665.8	18.0865	-0.124194	0.954741	TCONS_00039303	63.317	-0.0875681	0.956622	Ens95 longer	V4 longer
adprh	ENSDART00000125552	60.2306	-0.537372	0.625069	NM_001003453.2	59.9171	-0.523407	0.610019	TCONS_00014911	61.6135	-0.47459	0.682154	same	same
adprhl2	ENSDART00000011706	105.303	-1.49396	0.00606627	NM_001004565.2	118.237	-1.39432	0.00678448	TCONS_00037989	120.976	-1.33759	0.0107007	same	same
adprm	ENSDART00000105694	39.3037	0.357121	0.84694	XM_009306350.3	48.0154	0.333424	0.817412	TCONS_00016433	49.0596	0.362559	0.826899	same	same
adra1aa	ENSDART00000030938	142.494	1.63542	0.0209048	NM_001324454.1	142.48	1.63527	0.0197342	TCONS_00117233	311.422	1.92835	0.000569764	same	V4 longer
adra1bb	ENSDART00000060351	29.3759	-1.16422	0.237965	NM_001007358.2	32.2666	-1.04284	0.25489	TCONS_00024475	34.2495	-1.06709	0.230225	same	V4 longer
adra1d	ENSDART00000014678	1198.47	2.86495	5.78841e-08	XM_691951.6	1117.6	2.86966	1.69472e-08	TCONS_00004633	1216.92	2.91331	1.21971e-08	Ens95 longer	same
adra2da	ENSDART00000123912	57.6613	0.320387	0.833117	NM_194364.2	57.6627	0.320534	0.810275	TCONS_00023071	70.9744	0.335634	0.82768	same	same
adrb1	ENSDART00000020769	31.3352	0.765914	0.675782	NM_001128689.1	26.1531	0.637865	0.708952	TCONS_00017707	180.471	1.34974	0.11213	Ens95 longer	same
adrb2b	ENSDART00000146454	29.0756	-0.016908	0.995243	XM_021468744.1	29.0678	-0.0171653	0.9947	TCONS_00064624	29.4373	0.0154981	0.995034	same	same
adrb3a	ENSDART00000127633	470.073	0.883242	0.115358	NM_001128335.1	468.465	0.887467	0.0983726	TCONS_00118978	479.472	0.935376	0.0746327	same	same
adrb3b	ENSDART00000125314	14.1994	-0.899673	0.584069	NM_001135134.1	10.6217	-1.24624	0.585155	TCONS_00007650	18.738	-0.602993	0.734654	Ens95 longer	same
adrm1	ENSDART00000081433	1461.38	0.810125	0.123684	NM_201013.3	1461.47	0.83166	0.0958821	TCONS_00070133	1491.6	0.862206	0.0765391	same	same
adsl	ENSDART00000023454	626.35	1.35294	0.00986288	NM_199899.2	622.192	1.35312	0.00837516	TCONS_00082316	638.222	1.39715	0.00655139	same	same
adss	ENSDART00000018155	4.19482	-2.18272	0.469842	NM_001017804.1	4.19157	-2.18322	1	TCONS_00021277	121.823	-1.16902	0.156007	same	V4 longer
adssl	ENSDART00000134617	1542.62	0.347718	0.682259	NM_173237.1	687.726	0.083489	0.947437	ENSDART00000134617	1579.17	0.402212	0.609392	Ens95 longer	same
adssl1	ENSDART00000172540	35.758	0.0907086	0.96182	NM_214820.1	36.0841	0.0763943	0.961305	TCONS_00036693	45.1671	0.183548	0.913657	same	V4 longer
adtrp1	ENSDART00000039829	232.028	0.181377	0.856627	NM_001017719.1	232.056	0.184088	0.830683	TCONS_00069923	268.887	0.297508	0.720504	same	V4 longer
aebp1	ENSDART00000131435	96.8225	-1.76804	0.00928075	NM_001324409.1	26.1803	-0.602987	0.761507	ENSDART00000131435	97.6001	-1.73951	0.0113402	Ens95 longer	same
aebp2	ENSDART00000019518	705.791	0.37943	0.551425	NM_213494.2	671.328	0.360499	0.543812	TCONS_00093022	724.271	0.422393	0.450626	Ens95 longer	same
aep1	ENSDART00000057101	247.296	2.33411	0.00881777	NM_001013304.2	247.729	2.32682	0.00891572	TCONS_00114313	254.476	2.40181	0.00868544	same	same
aes	ENSDART00000105564	110.183	0.0226783	0.988414	NM_200423.1	146.616	-0.0460644	0.965397	TCONS_00068911	150.053	0.000784311	0.999907	same	V4 longer
afap1	ENSDART00000153199	200.805	0.980093	0.349995	XM_005156227.4	1147.57	1.12505	0.0515236	TCONS_00015316	1171.59	1.15251	0.0449338	RefSeq longer	same
afap1l1a	ENSDART00000128869	341.74	0.859301	0.223975	XM_005173256.4	341.384	0.855297	0.19754	TCONS_00026361	347.382	0.900546	0.173754	same	same
afap1l1b	ENSDART00000078949	4223.5	5.55152	2.5475e-27	XM_005161304.4	4270.05	5.56234	3.2212e-28	TCONS_00064420	4346.27	5.61179	1.02573e-29	RefSeq longer	same
afap1l2	ENSDART00000102081	264.101	0.00227197	0.999827	XM_009306759.3	262.815	0.0474027	0.956932	TCONS_00015728	270.618	0.0478523	0.962564	same	same
afdna	ENSDART00000152888	3147.42	2.14025	1.24101e-07	XM_021468676.1	948.922	2.31905	5.05269e-05	ENSDART00000152888	3194.15	2.18877	9.8426e-09	Ens95 longer	same
aff2	ENSDART00000074070	344.312	-1.42862	0.00335503	XM_002664383.5	96.5403	-1.41265	0.0942151	TCONS_00023654	364.898	-1.33779	0.00373028	Ens95 longer	same
aff3	ENSDART00000137922	142.819	0.0668803	0.959261	XM_021478898.1	143.151	0.0702953	0.94735	TCONS_00125671	146.254	0.0758678	0.95049	same	V4 longer
afg1la	ENSDART00000156637	94.0837	-0.292369	0.765653	NM_001199767.1	94.1011	-0.287988	0.741146	TCONS_00036862	96.1605	-0.258835	0.797591	Ens95 longer	same
afg1lb	ENSDART00000062978	156.31	0.544915	0.615194	XM_021468423.1	165.659	0.374689	0.713432	TCONS_00059220	168.793	0.388628	0.729275	RefSeq longer	same
afg3l2	ENSDART00000169028	351.295	-0.0295602	0.977854	NM_001111197.1	351.336	-0.0279758	0.973618	TCONS_00050378	363.747	0.0213558	0.982977	same	V4 longer
afmid	ENSDART00000168066	221.914	0.233412	0.811986	XM_009306326.3	220.023	0.27131	0.747006	ENSDART00000168066	228.381	0.267817	0.775482	Ens95 longer	same
afp4	ENSDART00000133213				XM_691999.9				TCONS_00036237	121.635	-0.192922	0.949156	Ens95 longer	same
afp4	ENSDART00000184289	117.564	-0.275185	0.922048	NM_001045488.1	111.506	-0.181557	0.947224	TCONS_00036238	121.635	-0.192922	0.949156	Ens95 longer	same
aftpha	ENSDART00000150492	51.2664	0.188433	0.939003	XM_005160171.4	613.154	0.28223	0.634781	TCONS_00002422	626.255	0.335919	0.563796	RefSeq longer	same
aga	ENSDART00000016728	350.04	0.272972	0.757232	XM_021481042.1	350.107	0.263793	0.735897	TCONS_00026439	357.979	0.314523	0.704044	same	same
agap1	ENSDART00000179312	1417.49	0.592068	0.341262	XM_001921491.7	1494.56	0.618148	0.265099	TCONS_00108567	1538.49	0.676573	0.207771	Ens95 longer	same
agap2	ENSDART00000159560	552.114	0.864477	0.393061	XM_009297046.3	738.311	0.695779	0.451573	ENSDART00000159560	566.849	0.933845	0.337692	RefSeq longer	Ens95/RefSeq longer
AGBL1	ENSDART00000171408	9.34959	-2.21017	0.241816	XM_017354256.2	9.34474	-2.0993	0.268411	ENSDART00000171408	9.36333	-2.16632	0.287226	Ens95 longer	same
agbl2	ENSDART00000114662	18.6968	-0.815738	0.557005	NM_001320148.1	8.07524	-1.5054	1	TCONS_00080725	8.40883	-1.56575	0.321602	Ens95 longer	same
agbl4	ENSDART00000151746	22.5913	-0.678905	0.641773	NM_001017754.1	13.8474	-1.22118	0.512822	ENSDART00000151746	22.9464	-0.63235	0.67886	same	same
agfg1a	ENSDART00000043960	942.317	1.09316	0.017148	XM_009291789.3	899.986	1.10591	0.0187502	TCONS_00030899	970.825	1.14708	0.0108457	same	same
agfg1b	ENSDART00000145107	665.981	0.470656	0.543464	NM_200588.2	665.971	0.471586	0.499045	TCONS_00050171	679.869	0.517648	0.462027	same	V4 longer
aggf1	ENSDART00000189131	511.346	0.734653	0.163802	NM_001079982.1	510.714	0.729947	0.140197	TCONS_00063026	531.069	0.796441	0.0825048	same	same
agk	ENSDART00000006109	184.145	0.103434	0.920393	NM_199880.1	184.143	0.108945	0.897639	TCONS_00042022	187.639	0.153283	0.867913	same	same
agla	ENSDART00000168537	279.737	-0.735107	0.197392	XM_005163617.3	283.628	-0.731156	0.172773	TCONS_00050301	289.198	-0.680256	0.218391	same	same
aglb	ENSDART00000184802	9.9891	-1.54252	0.311685	XM_021470359.1	8.06086	-1.2918	1	ENSDART00000184802	10.3277	-1.23318	0.519534	Ens95 longer	same
agmat	ENSDART00000162737	11.2229	-0.340218	0.944634	NM_001077551.1	11.2353	-0.338828	1	rna59015	11.5667	-0.265364	0.959974	same	same
agmo	ENSDART00000147582	131.444	-1.74166	0.00186416	NM_212883.2	131.79	-1.73457	0.00179182	TCONS_00030837	134.871	-1.6822	0.00305519	same	same
ago1	ENSDART00000156255	27.0187	-0.137469	0.960509	XM_005158472.4	34.7901	-0.506827	0.69751	TCONS_00036413	264.971	-0.697827	0.243777	RefSeq longer	V4 longer
ago2	ENSDART00000087187	29.2974	0.0435857	0.99041	XM_009294368.3	1221.03	0.125293	0.870924	TCONS_00046635	1252.33	0.178348	0.833874	RefSeq longer	V4 longer
ago3a	ENSDART00000083777	224.149	0.706845	0.380366	XM_009292707.3	278.415	0.645145	0.399871	TCONS_00036409	283.971	0.685156	0.387899	RefSeq longer	same
ago3b	ENSDART00000091813	124.26	0.338862	0.84183	XM_005159456.3	622.877	1.06346	0.120741	TCONS_00045607	640.462	1.09128	0.116512	RefSeq longer	same
ago4	ENSDART00000170988	276.932	0.26284	0.743792	NM_001252559.2	229.618	0.262077	0.735273	TCONS_00049408	1529.22	0.0368704	0.974889	Ens95 longer	V4 longer
agpat2	ENSDART00000172174	627.322	0.103346	0.913213	NM_001077732.1	627.053	0.104392	0.894079	TCONS_00060736	639.842	0.153844	0.852467	same	same
agpat3	ENSDART00000115081	684.564	-0.0288419	0.984035	XM_005170977.4	2022.39	-0.207472	0.798776	TCONS_00004879	2064.79	-0.155455	0.870115	RefSeq longer	same
agpat4	ENSDART00000100156	794.109	1.44487	0.0103382	NM_212992.1	793.676	1.42667	0.0092416	TCONS_00020299	804.875	1.4702	0.00653164	same	same
agpat5	ENSDART00000092105	115.329	0.718692	0.404685	NM_001076745.2	694.016	1.07373	0.0253244	TCONS_00021017	716.012	1.10247	0.0174842	RefSeq longer	V4 longer
agpat9l	ENSDART00000046440	38.0253	0.238812	0.92495	NM_001099450.1	14.4794	0.278997	1	TCONS_00098833	40.0184	0.295421	0.905608	Ens95 longer	V4 longer
agps	ENSDART00000143130	50.9479	0.586943	0.620626	NM_200113.1	48.3824	0.406333	0.736505	TCONS_00124893	518.488	0.0658081	0.949755	same	V4 longer
agr1	ENSDART00000085763	156.633	-0.091379	0.961119	NM_001099232.2	158.896	-0.0763258	0.960416	TCONS_00126879	162.041	-0.0198632	0.99116	same	same
agr2	ENSDART00000181841	551.936	-1.34032	0.00566338	NM_001012481.2	515.08	-1.40965	0.00973493	TCONS_00048762	576.295	-1.2734	0.00787316	Ens95 longer	same
agrn	ENSDART00000162838	2385.17	-0.0794131	0.928316	XM_009296860.3	2720.7	-0.100511	0.879794	TCONS_00070792	2775.91	-0.0479462	0.955329	same	same
agrp	ENSDART00000192732	8.39937	-3.16671	0.00494586	XM_009303347.3	2.57519	-4.81397	9.70063e-05	TCONS_00115521	8.41065	-3.15495	0.00787316	Ens95 longer	same
agt	ENSDART00000010918	26.756	-0.910067	0.513529	NM_198063.1	26.7637	-0.909795	0.483097	TCONS_00019652	27.4425	-0.838648	0.570132	same	same
agtpbp1	ENSDART00000172642	37.1248	0.289723	0.865923	XM_017357335.2	37.7679	0.28419	0.847236	ENSDART00000172642	37.4981	0.33347	0.845382	RefSeq longer	Ens95/RefSeq longer
agtr1b	ENSDART00000149911	82.4485	2.44075	0.0598389	XM_005162528.4	122.983	2.26851	0.00201451	TCONS_00075990	1307.5	5.19971	8.45005e-13	RefSeq longer	V4 longer
agtr2	ENSDART00000051532	938.912	1.40783	0.010329	NM_001013350.2	937.6	1.41128	0.00845791	TCONS_00099331	955.084	1.45288	0.00626816	same	same
agtrap	ENSDART00000157703	89.5729	0.946745	0.370145	NM_001201345.1	36.4077	0.75352	0.674596	TCONS_00010874	91.3199	1.00304	0.341651	Ens95 longer	same
agxt2	ENSDART00000169024	19.2798	-1.69147	0.345235	NM_001033750.1	19.2889	-1.69076	0.328023	TCONS_00060870	48.3972	-1.11764	0.135611	same	V4 longer
ahctf1	ENSDART00000177889	929.075	-0.0567175	0.956387	XM_009292870.3	918.308	-0.0603196	0.944331	TCONS_00039318	951.782	-0.00148828	0.999907	Ens95 longer	same
ahcy	ENSDART00000018523	5599.57	1.02938	0.0704673	NM_199218.1	5602.57	1.03219	0.05799	TCONS_00107312	5729.27	1.07871	0.0510937	same	same
ahcyl1	ENSDART00000078795	514.299	-0.875856	0.2693	NM_201293.1	515.773	-0.869359	0.248293	TCONS_00121028	528.987	-0.808791	0.315567	same	same
ahcyl2	ENSDART00000130453	347.706	-0.0746083	0.937279	NM_201340.1	290.068	0.0115899	0.991056	rna8635	296.589	0.0630605	0.950128	Ens95 longer	Ens95/RefSeq longer
ahdc1	ENSDART00000151571	57.7217	-2.53324	5.7373e-09	XM_003200637.5	53.8425	-2.62516	6.66687e-10	TCONS_00046851	61.9897	-2.43223	1.08031e-08	Ens95 longer	V4 longer
ahnak	ENSDART00000088484	11770.8	1.11798	0.0119058	XM_005173182.4	11762.9	1.11951	0.00849594	TCONS_00023941	11984.4	1.16441	0.00498761	same	same
ahr1b	ENSDART00000028787	61.8749	0.481518	0.77719	NM_001024816.2	61.8803	0.481695	0.750487	TCONS_00068380	393.186	0.770548	0.446255	same	V4 longer
ahr2	ENSDART00000105762	5512.48	1.84638	5.94894e-05	NM_131264.1	5499.69	1.85326	3.59557e-05	ENSDART00000105762	5601.48	1.88966	1.46554e-05	same	same
ahrrb	ENSDART00000074511	6.43238	-1.97142	0.399467	NM_001033920.1	6.43733	-1.97035	0.378113	TCONS_00054863	11.3072	-1.28332	0.643684	same	V4 longer
ahsa1a	ENSDART00000029781	359.503	1.3758	0.214275	NM_001045091.1	352.44	1.36134	0.198451	TCONS_00056436	364.828	1.4057	0.206078	Ens95 longer	same
ahsg1	ENSDART00000028565	1.93	-1.81344	0.607217	NM_212622.1	1.93031	-1.8134	1	TCONS_00067347	1.93327	-1.81277	1	same	same
ahsg2	ENSDART00000100725	13.2065	0.355492	0.892332	NM_001100029.1	13.2099	0.356141	1	TCONS_00049926	13.5488	0.436125	0.868091	same	same
aicda	ENSDART00000016834	9.69449	1.20539	0.729499	NM_001008403.1	9.69311	1.20575	1	TCONS_00032047	10.0314	1.25368	0.727423	same	same
aida	ENSDART00000010271	209.007	0.687719	0.351623	NM_200790.2	359.218	0.841849	0.0768848	TCONS_00057519	371.33	0.90636	0.0468117	RefSeq longer	V4 longer
aif1l	ENSDART00000009500	634.149	-0.955248	0.128164	NM_198870.1	634.038	-0.952146	0.11512	TCONS_00099986	651.597	-0.891919	0.159348	same	same
aifm1	ENSDART00000131889	591.468	-0.338647	0.62907	NM_200102.2	591.567	-0.337646	0.588975	TCONS_00102596	604.948	-0.287306	0.687508	same	same
aifm2	ENSDART00000184238	530.429	0.495342	0.471636	NM_001200010.1	530.157	0.510975	0.410073	TCONS_00018844	542.192	0.548753	0.393897	Ens95 longer	same
aifm4	ENSDART00000154164	65.3499	-1.70578	0.0196612	XM_005157590.4	60.1851	-1.7938	0.0357269	ENSDART00000154164	67.3894	-1.63294	0.0290525	Ens95 longer	same
aifm5	ENSDART00000131717	0	-5.32128	1	XM_001920876.3	13.846	-1.92754	0.269755	TCONS_00064791	14.1938	-1.93706	0.30968	RefSeq longer	V4 longer
aig1	ENSDART00000138539	69.3883	-1.04169	0.501149	XM_009294877.3	42.4429	-1.03429	0.463338	TCONS_00056982	75.6218	-0.948462	0.570374	Ens95 longer	same
aimp1	ENSDART00000084184	866.253	0.63403	0.297412	NM_001045851.1	866.346	0.636062	0.261415	TCONS_00002118	885.613	0.684919	0.230376	same	same
aimp2	ENSDART00000009194	310.044	0.524581	0.422161	NM_213338.1	310.083	0.526907	0.377962	TCONS_00087433	316.959	0.580414	0.330315	same	same
aip	ENSDART00000166251	1741.27	0.858461	0.0539562	NM_214712.1	1680.86	0.833522	0.0630767	TCONS_00001570	1782.31	0.914131	0.0294305	Ens95 longer	same
ajap1	ENSDART00000172190	162.925	-2.07463	0.000472977	XM_021478418.1	38.9732	-2.59877	8.21246e-05	TCONS_00117937	258.893	-2.10391	0.000754913	Ens95 longer	V4 longer
ajuba	ENSDART00000111923	940.177	0.593094	0.260766	XM_696274.9	939.579	0.594595	0.219491	TCONS_00114860	958.308	0.641345	0.177319	same	same
ak3	ENSDART00000132995	551.181	0.887962	0.132674	NM_213130.2	592.515	0.868389	0.134086	TCONS_00008482	560.345	0.93337	0.0914276	RefSeq longer	Ens95/RefSeq longer
ak4	ENSDART00000187738	301.55	0.281488	0.734458	NM_213299.1	298.658	0.321275	0.642818	TCONS_00109207	312.309	0.339822	0.647865	Ens95 longer	same
ak5l	ENSDART00000029364	35.4331	-1.25867	0.208106	NM_001017540.2	35.4452	-1.24182	0.20231	TCONS_00104672	55.217	-1.36063	0.0726316	same	V4 longer
AK6	ENSDART00000144303	322.211	0.220219	0.863219	NM_001002118.1	322.273	0.222359	0.839508	TCONS_00099512	329.795	0.275189	0.8224	same	same
ak7b	ENSDART00000080029	14.2089	-0.881667	0.654228	NM_001109698.2	14.2116	-0.881565	0.623198	TCONS_00039635	17.4471	-0.847299	0.631691	same	V4 longer
ak8	ENSDART00000043096	4.20028	-2.63884	0.0717216	NM_001020644.1	4.20027	-2.63889	1	ENSDART00000043096	4.20588	-2.60278	0.0911318	same	same
ak9	ENSDART00000135845	35.5011	-0.863037	0.384789	XM_009294789.3	35.5009	-0.781225	0.42143	TCONS_00056725	35.8729	-0.835389	0.405845	same	same
akap12a	ENSDART00000155970	249.933	1.2071	0.214275	XM_005158609.4	250.813	1.21216	0.182107	TCONS_00036904	295.444	1.08338	0.230222	same	V4 longer
akap17a	ENSDART00000159192	160.675	-0.107559	0.93867	NM_200682.2	190.052	-0.0109242	0.993405	TCONS_00127138	196.77	0.0446273	0.974893	RefSeq longer	V4 longer
akap1a	ENSDART00000136554	6.75316	-1.04094	0.689156	XM_001342267.8	3.21436	-1.38491	1	TCONS_00007456	7.08612	-0.904446	0.75307	Ens95 longer	same
akap1b	ENSDART00000112511	472.093	-0.532044	0.461983	NM_001098179.2	179.163	-0.11236	0.912973	TCONS_00030622	485.725	-0.477652	0.520497	Ens95 longer	same
akap7	ENSDART00000131642	2.57892	-1.17341	0.733847	XM_021468584.1	783.1	0.23247	0.821904	TCONS_00055515	799.633	0.281877	0.802263	RefSeq longer	same
akap9	ENSDART00000110495	794.482	-0.0519023	0.959432	XM_021468220.1	1151.09	0.170701	0.784532	TCONS_00045023	938.447	0.0753879	0.930514	same	same
akip1	ENSDART00000100126	165.557	0.910511	0.245909	XM_005159110.4	165.242	0.907919	0.222114	TCONS_00043887	168.369	0.981074	0.19286	same	same
akirin1	ENSDART00000110195	1107.95	-0.0233716	0.984245	NM_001007186.2	1093.93	-0.0128451	0.989464	TCONS_00032988	1133.83	0.0320334	0.976252	Ens95 longer	same
akna	ENSDART00000143874	34.1428	-1.72369	0.0376578	XM_005161116.4	37.043	-1.74012	0.0374696	TCONS_00063365	107.51	-1.41261	0.0150239	RefSeq longer	V4 longer
LOC110437760	ENSDART00000137465	10.0315	-0.289859	0.941939	XM_021468014.1	31.0385	-0.27132	0.888552	rna4608	23.9531	-0.447436	0.842085	RefSeq longer	same
akr1a1a	ENSDART00000051082	5.77501	-0.361758	0.940396	NM_001003783.2	5.781	-0.360478	1	TCONS_00103792	6.1076	-0.219219	0.966322	same	same
akr7a3	ENSDART00000192352	363.06	0.195031	0.816835	NM_001002369.1	203.996	0.371669	0.702257	TCONS_00011989	296.445	0.248797	0.742099	Ens95 longer	same
akt1s1	ENSDART00000157320	888.123	-0.181289	0.788175	XM_687419.9	887.916	-0.180175	0.753685	TCONS_00082618	906.855	-0.128893	0.8468	same	same
akt2	ENSDART00000026767	1465.56	0.786	0.0822339	NM_198146.2	1449.89	0.778378	0.0674769	TCONS_00044569	1796.79	0.555996	0.176475	same	V4 longer
akt2l	ENSDART00000165244	484.797	1.09033	0.0828918	NM_212815.2	484.434	1.08107	0.0720616	TCONS_00007935	493.559	1.13235	0.0574225	same	same
akt3a	ENSDART00000164566	55.7364	-0.734864	0.472465	NM_001197201.2	22.2135	-1.13605	0.510191	TCONS_00021268	106.112	-0.732255	0.373986	Ens95 longer	V4 longer
akt3b	ENSDART00000122445	71.415	0.271571	0.882031	XM_001923419.7	62.4324	0.218077	0.89534	TCONS_00005179	938.448	0.80267	0.0624232	Ens95 longer	V4 longer
aktip	ENSDART00000188703	500.971	-0.0772941	0.935878	NM_001320324.1	500.091	-0.0771741	0.919252	TCONS_00112450	512.376	-0.0209103	0.983065	Ens95 longer	same
AL627305.1	ENSDART00000157922	10.9442	-1.72659	0.26207	XM_021468946.1	5.80677	-1.69183	1	TCONS_00060434	10.6373	-1.72958	0.2943	Ens95 longer	same
AL845330.1	ENSDART00000177014	26.1883	-0.479242	0.824304	XM_005161832.4	0	-5.85985	1	TCONS_00067103	26.8689	-0.41805	0.855842	Ens95 longer	same
LOC101885386	ENSDART00000174034	3.5434	-1.34966	0.685913	XM_021477950.1	27.1406	0.935274	0.587268	rna25454	27.1738	0.967905	0.620672	RefSeq longer	Ens95/RefSeq longer
AL935065.1	ENSDART00000165513	10.2907	0.605675	0.867116	NM_001128541.1	10.298	0.606178	1	TCONS_00103571	28.4104	1.28946	0.475597	same	V4 longer
AL954696.1	ENSDART00000111651	235.295	0.226846	0.80537	XM_002662078.5	208.816	0.180739	0.850044	TCONS_00055262	240.161	0.275461	0.7518	Ens95 longer	same
AL954741.2	ENSDART00000190639	192.051	-0.0410417	0.976005	XM_021469387.1	5.79237	-1.47855	1	ENSDART00000190639	194.898	0.0140754	0.991091	Ens95 longer	same
alad	ENSDART00000181970	200.734	-0.0746464	0.946689	NM_001017645.1	106.566	-0.183731	0.874743	ENSDART00000181970	196.171	-0.0763296	0.946547	Ens95 longer	same
alas1	ENSDART00000005217	5359.58	1.61671	0.000155227	NM_201287.1	5354.99	1.61759	9.80035e-05	ENSDART00000005217	5459.22	1.66153	4.58088e-05	same	same
alas2	ENSDART00000056420	436.177	1.01537	0.44391	NM_131682.2	434.751	1.03635	0.40471	TCONS_00117916	443.571	1.07313	0.404106	same	same
alcama	ENSDART00000129400	679.115	-1.65292	0.00230796	XM_005172635.4	907.099	-1.39253	0.00758247	TCONS_00009233	705.383	-1.58158	0.00342352	same	same
alcamb	ENSDART00000101204	417.707	-1.26387	0.212144	NM_212634.3	419.584	-1.25937	0.195251	TCONS_00027625	432.286	-1.19236	0.25181	same	same
aldh16a1	ENSDART00000124943	253.278	0.662724	0.347392	NM_001079954.2	257.506	0.677921	0.292148	TCONS_00082707	263.013	0.729528	0.264945	same	same
aldh18a1	ENSDART00000181501	598.345	-0.433126	0.463589	NM_001083546.3	553.813	-0.439554	0.423759	TCONS_00015778	611.16	-0.382932	0.498285	Ens95 longer	same
aldh1a2	ENSDART00000075519	1619.14	0.0774703	0.962427	NM_131850.1	1497.45	0.123176	0.927078	TCONS_00115227	1664.31	0.141606	0.925791	Ens95 longer	same
aldh1a3	ENSDART00000055593	93.736	-0.675597	0.636755	NM_001044745.1	35.3719	-1.05728	0.592336	TCONS_00114360	95.814	-0.624048	0.675953	Ens95 longer	same
aldh1l2	ENSDART00000102893	19.6517	0.118284	0.968739	XM_002661372.6	189.686	0.200973	0.816509	TCONS_00088066	70.6892	-0.112361	0.959028	RefSeq longer	same
aldh2.1	ENSDART00000016808	869.359	-0.113643	0.89092	NM_200490.1	853.876	-0.121582	0.857898	TCONS_00105088	882.876	-0.0668459	0.937024	same	same
aldh3a1	ENSDART00000179387	138.009	0.739866	0.455167	XM_001335943.7	96.329	0.452853	0.700966	TCONS_00027713	140.79	0.766561	0.42573	Ens95 longer	same
aldh3b1	ENSDART00000020017	124.954	-0.115802	0.945057	NM_173221.2	125.29	-0.108417	0.939196	TCONS_00082894	127.727	-0.0587729	0.974494	same	same
aldh4a1	ENSDART00000173103	41.807	-0.999487	0.465178	NM_201158.1	42.1564	-0.981721	0.448041	TCONS_00011996	55.1007	-0.948437	0.373495	same	V4 longer
aldh6a1	ENSDART00000075520	1741.28	-0.160721	0.841348	NM_001002374.2	1720.89	-0.152885	0.824482	TCONS_00040746	1779.35	-0.110449	0.893277	Ens95 longer	same
aldh7a1	ENSDART00000122540	961.856	-0.129526	0.882179	NM_212724.1	958.812	-0.126433	0.86186	TCONS_00008636	983.948	-0.0765109	0.933742	same	same
aldh8a1	ENSDART00000053399	42.7373	0.78295	0.695494	NM_001004540.1	43.0819	0.813374	0.650843	ENSDART00000053399	44.0994	0.844762	0.676466	same	same
aldh9a1a.1	ENSDART00000171771	2627.23	0.285789	0.720726	XM_005166774.3	2626.96	0.289828	0.677846	TCONS_00120786	2683.38	0.338664	0.637018	Ens95 longer	same
aldh9a1a.2	ENSDART00000100281	3.5353	-1.13224	0.753775	XM_021478161.1	7.39745	-0.182823	1	TCONS_00120784	7.72729	-0.0651841	0.986925	RefSeq longer	same
aldh9a1b	ENSDART00000053868	251.179	0.825547	0.143553	NM_201508.1	251.175	0.855556	0.107821	TCONS_00049759	286.822	0.938354	0.0584611	same	V4 longer
aldoaa	ENSDART00000020741	4424.6	0.610797	0.31604	NM_194377.2	4412.39	0.608457	0.284059	TCONS_00083288	4531.99	0.667982	0.233866	same	same
aldoab	ENSDART00000042200	136.834	-0.204853	0.874406	NM_213215.1	136.846	-0.198918	0.857609	TCONS_00016641	139.284	-0.154825	0.907259	same	same
aldoca	ENSDART00000080377	25.2295	-2.72826	0.0432992	NM_001029952.1	23.9333	-2.77887	0.0396372	ENSDART00000080377	25.9079	-2.66947	0.0634312	same	same
aldocb	ENSDART00000183995	1984.84	-1.09789	0.093781	NM_194384.1	1955.2	-1.1132	0.0786948	TCONS_00064802	2032.69	-1.03512	0.109211	Ens95 longer	same
alg1	ENSDART00000077235	148.514	-0.337433	0.738532	NM_199867.1	147.254	-0.349902	0.692515	TCONS_00082555	151.966	-0.276067	0.790392	same	same
alg10	ENSDART00000076037	36.7511	-0.279811	0.905375	NM_001327833.1	44.485	-0.331097	0.846572	TCONS_00089010	112.066	-0.0996925	0.9531	RefSeq longer	V4 longer
alg11	ENSDART00000049514	163.26	0.136488	0.901249	NM_001161351.1	162.933	0.133563	0.885686	TCONS_00004261	166.073	0.184511	0.852863	same	same
alg12	ENSDART00000115200	331.012	-0.135973	0.902944	NM_001098749.1	309.131	-0.162213	0.868022	TCONS_00088982	351.816	-0.128402	0.910393	Ens95 longer	same
alg13	ENSDART00000064320	1.93524	-2.90917	0.147749	NM_001031838.1	1.93459	-2.90947	1	TCONS_00064598	1.93804	-2.84325	0.18449	same	same
alg2	ENSDART00000103257	226.445	0.114247	0.922726	XM_017351332.2	244.536	0.168504	0.849464	TCONS_00035162	250.041	0.213715	0.828679	RefSeq longer	Ens95/RefSeq longer
alg3	ENSDART00000075146	53.7715	-0.604157	0.609925	XM_005171382.3	102.515	-0.293698	0.759043	TCONS_00051654	104.584	-0.285062	0.798816	RefSeq longer	V4 longer
alg5	ENSDART00000087114	2059.36	1.25301	0.00717487	NM_001045354.1	622.701	0.489974	0.408699	ENSDART00000131279	637.797	0.531888	0.372597	Ens95 longer	Ens95/RefSeq longer
alg8	ENSDART00000065565	171.682	-0.112323	0.92411	NM_001017647.1	171.705	-0.109594	0.910808	TCONS_00061685	175.492	-0.0547848	0.964973	same	same
alg9	ENSDART00000005090	445.176	-0.198824	0.806669	NM_200625.2	446.535	-0.195442	0.78076	TCONS_00101072	458.728	-0.134666	0.870484	same	same
alk	ENSDART00000150116	58.4123	-1.08224	0.178394	XM_686872.8	38.0687	-0.972151	0.370673	ENSDART00000150116	59.1409	-1.02816	0.206953	Ens95 longer	same
alkal1	ENSDART00000110571	13.2345	-1.88304	0.119749	XM_003199060.5	9.05829	-1.27868	1	TCONS_00117736	15.8383	-1.78761	0.125792	Ens95 longer	same
alkal2b	ENSDART00000156509	8.03055	-2.43827	0.142016	XM_002665204.5	8.03514	-2.47983	0.123572	TCONS_00040207	8.36654	-2.34902	0.197117	same	same
alkbh1	ENSDART00000138189	159.63	-0.00953823	0.995789	NM_001020691.1	159.351	-0.00891449	0.995434	TCONS_00037248	163.431	0.0399563	0.980938	Ens95 longer	V4 longer
alkbh2	ENSDART00000134492	23.7938	-0.550444	0.765517	NM_001256684.1	36.3994	-0.616638	0.576897	TCONS_00103824	24.478	-0.484564	0.80717	RefSeq longer	Ens95/RefSeq longer
alkbh3	ENSDART00000192558	256.853	-0.467372	0.488345	XM_005163144.4	145.421	-0.0613058	0.950653	ENSDART00000192558	157.918	-0.0308776	0.979883	Ens95 longer	same
alkbh4	ENSDART00000074073	136.321	0.157346	0.905125	NM_001326370.1	136.32	0.157366	0.888318	TCONS_00101223	139.105	0.207265	0.869415	same	same
alkbh5	ENSDART00000091683	81.3553	0.575313	0.627354	NM_001077387.1	82.002	0.544682	0.615696	TCONS_00000345	243.595	0.240792	0.798816	same	V4 longer
alkbh6	ENSDART00000111414	41.9328	0.265447	0.858857	NM_001005390.1	37.4011	0.155243	0.912394	TCONS_00100057	43.2843	0.322948	0.824893	same	same
alkbh7	ENSDART00000055248	73.4454	-0.368854	0.739399	NM_001017609.1	72.8132	-0.386246	0.692744	TCONS_00082891	75.1701	-0.307808	0.791337	same	same
alkbh8	ENSDART00000084715	83.2097	-0.00055863	0.999827	XM_009292590.3	126.349	-0.203695	0.824219	TCONS_00036008	128.778	-0.155814	0.888788	same	same
alms1	ENSDART00000109126	516.519	-0.210784	0.807295	XM_685283.8	514.959	-0.204791	0.785879	TCONS_00018942	528.588	-0.168195	0.848776	same	same
alox12	ENSDART00000101126	113.001	-0.634898	0.495825	NM_199618.1	113.353	-0.6225	0.47191	TCONS_00111832	132.561	-0.451215	0.639455	same	V4 longer
alox5ap	ENSDART00000077008	34.7789	0.870274	0.561287	NM_200061.2	34.7917	0.799479	0.577524	TCONS_00007402	35.4778	0.921326	0.540603	Ens95 longer	same
alox5b.2	ENSDART00000156586	3.23748	-1.20253	0.792229	NM_001045331.1	3.56114	-1.1854	1	ENSDART00000156586	3.24128	-1.26304	0.776555	same	same
alox5b.3	ENSDART00000188882	14.2269	-0.269661	0.935353	NM_001020578.1	13.9049	0.0332127	1	ENSDART00000188882	14.8907	-0.149431	0.965794	Ens95 longer	same
alpi.1	ENSDART00000015016	144.41	-1.56009	0.00605962	XM_009296531.2	127.238	-1.65578	0.0233925	ENSDART00000015016	147.527	-1.50382	0.00827475	Ens95 longer	same
alpi.2	ENSDART00000182926	17.6765	-0.583818	0.846374	NM_001025188.1	13.8317	-0.412525	0.88823	ENSDART00000182926	24.8057	-0.35417	0.916875	Ens95 longer	same
alpk2	ENSDART00000137858	32.3082	-0.839042	0.572035	XM_017353037.2	34.2641	-0.239028	0.912042	TCONS_00060862	38.1804	-0.987356	0.461361	Ens95 longer	same
alpk3a	ENSDART00000110843	32.6181	-0.637363	0.674214	XM_005159304.4	40.9979	-0.786998	0.463412	ENSDART00000110843	32.9843	-0.59489	0.705079	Ens95 longer	same
alpk3b	ENSDART00000173749	29.9885	-0.955478	0.338338	XM_021477851.1	30.3132	-0.995067	0.283291	TCONS_00115203	30.6777	-0.979519	0.328481	same	same
alpl	ENSDART00000146461	213.021	1.78838	0.00150896	XM_005169273.4	2264.41	2.69552	1.64025e-07	TCONS_00011433	2303.52	2.73832	7.14981e-08	RefSeq longer	same
als2b	ENSDART00000149896	481.113	-0.129601	0.867565	XM_002662296.6	480.831	-0.131331	0.840453	TCONS_00105669	490.847	-0.0829657	0.915146	same	same
alx4a	ENSDART00000124363	76.454	-2.86332	6.65001e-07	XM_001340930.6	54.8726	-2.93452	2.37694e-06	TCONS_00115059	77.8547	-2.81963	1.04099e-06	Ens95 longer	same
alx4b	ENSDART00000132534	6.43334	-2.28217	0.212901	NM_001310078.1	6.43436	-1.93035	1	TCONS_00042729	18.712	-2.21029	0.181929	Ens95 longer	same
amacr	ENSDART00000080110	7.76448	-1.80622	0.434127	NM_001020626.1	7.76281	-1.69876	0.452177	TCONS_00061448	79.4152	-0.473207	0.595625	same	V4 longer
ambn	ENSDART00000121605	1.60328	-1.59548	1	XM_021476454.1	1.60504	-2.89751	1	TCONS_00004687	1.92779	-2.63452	0.479225	RefSeq longer	same
ambra1b	ENSDART00000104686	584.908	-0.112165	0.908331	NM_001302220.1	137.818	0.0680875	0.954561	TCONS_00079810	597.72	-0.0569623	0.956622	Ens95 longer	same
amd1	ENSDART00000135919	2380.74	0.176088	0.790608	NM_001161601.1	2356.8	0.169559	0.765632	TCONS_00055548	2433.3	0.228767	0.685043	same	same
AMDHD1	ENSDART00000021947	26.4352	-0.2881	0.890329	NM_001166353.2	30.9713	-0.171064	0.931928	ENSDART00000021947	14.473	-1.15897	0.660927	same	same
amdhd2	ENSDART00000159647	420.689	0.880977	0.0836661	XM_005163743.4	380.424	1.05368	0.0276194	TCONS_00084961	429.375	0.939209	0.04786	Ens95 longer	same
amer1	ENSDART00000113066	404.186	-0.333594	0.660063	NM_001346277.1	403.905	-0.332829	0.617304	TCONS_00102567	411.863	-0.280811	0.70305	same	same
amer2	ENSDART00000115165	363.923	-0.866869	0.406889	NM_001100152.1	365.404	-0.859603	0.380426	TCONS_00075059	375.494	-0.798523	0.460549	same	same
amfra	ENSDART00000122559	1227.17	0.675255	0.229117	XM_009298211.3	1227.08	0.67654	0.196201	TCONS_00081036	1263.8	0.723069	0.165076	same	same
amfrb	ENSDART00000193422	30.3713	-1.02299	0.457317	XM_005169009.4	13.8905	-1.04942	0.518637	ENSDART00000193422	30.4116	-0.976378	0.497021	Ens95 longer	same
amh	ENSDART00000013803	40.0872	1.00035	0.6344	XM_009296234.3	13.9005	0.216476	1	TCONS_00068815	40.7837	0.788036	0.719446	Ens95 longer	V4 longer
ammecr1	ENSDART00000013814	1663.66	1.05711	0.0353017	NM_200581.1	1660.01	1.05697	0.0276194	TCONS_00065080	4397.91	0.769477	0.036226	same	V4 longer
amn1	ENSDART00000075151	150.022	-0.350883	0.699638	NM_001045454.1	138.375	-0.387282	0.62584	TCONS_00078967	152.492	-0.304971	0.737539	Ens95 longer	same
amot	ENSDART00000114778	340.14	0.592807	0.45403	XM_005173887.4	236.014	0.888	0.183277	TCONS_00062161	347.41	0.638477	0.392796	Ens95 longer	same
amotl2a	ENSDART00000160354	4753.98	1.67054	6.36141e-06	NM_001080177.1	130.858	1.2522	0.231401	TCONS_00106369	4846.37	1.71785	7.64758e-07	Ens95 longer	same
amotl2b	ENSDART00000145944	819.642	0.245773	0.811021	XM_005171208.4	821.64	0.248348	0.780174	TCONS_00050441	837.314	0.290691	0.767891	same	same
ampd1	ENSDART00000042755	13.8641	-1.38318	0.439009	NM_200893.1	13.8706	-1.38236	0.411519	TCONS_00120128	14.2066	-1.49671	0.400414	same	same
ampd2b	ENSDART00000093090	118.473	-1.09077	0.140044	XM_005167114.4	122.701	-1.06056	0.137598	TCONS_00118234	125.104	-1.01447	0.18136	same	same
ampd3a	ENSDART00000149680	115.487	0.382021	0.795261	XM_009303599.3	49.6682	-0.742833	0.544744	TCONS_00116654	135.397	0.56873	0.67678	Ens95 longer	V4 longer
ampd3b	ENSDART00000048722	56.5196	-0.354242	0.868544	XM_005159053.4	126.461	-0.105272	0.946695	TCONS_00043865	129.838	-0.0490616	0.980205	RefSeq longer	same
amph	ENSDART00000027689	270.693	-1.55229	0.198425	XM_009298602.3	333.387	-1.48982	0.140221	TCONS_00053785	345.998	-1.41266	0.184622	RefSeq longer	same
amt	ENSDART00000087151	72.7158	-0.723066	0.489386	NM_001006021.1	86.9463	-0.587687	0.533097	TCONS_00118362	102.226	-0.636884	0.496064	RefSeq longer	V4 longer
amy2a	ENSDART00000003035	3.21869	-2.67888	0.265631	NM_213011.2	3.2186	-2.56191	1	TCONS_00050143	9.70872	-1.04396	0.696622	same	same
anapc1	ENSDART00000180924	355.211	0.408301	0.549601	XM_001921133.4	342.969	0.489136	0.416975	ENSDART00000180924	362.835	0.456448	0.470894	Ens95 longer	same
anapc10	ENSDART00000175192	314.72	0.691818	0.327101	NM_001267696.1	290.495	0.792768	0.265719	rna59218	296.414	0.841878	0.241768	Ens95 longer	Ens95/RefSeq longer
anapc11	ENSDART00000192037	364.576	0.331047	0.75633	NM_001098480.1	334.573	0.410389	0.672608	TCONS_00108700	371.222	0.382182	0.698575	Ens95 longer	same
anapc13	ENSDART00000109886	328.642	1.04765	0.2562	NM_001302785.1	306.582	0.99811	0.257196	TCONS_00061718	332.967	1.0878	0.225311	same	same
anapc16	ENSDART00000126362	691.839	0.535875	0.513801	XM_005173001.4	691.498	0.535206	0.472721	TCONS_00016313	704.772	0.5858	0.439887	same	same
anapc2	ENSDART00000171159	163.167	0.0103349	0.993566	NM_001256746.2	163.18	0.00481803	0.996816	TCONS_00100980	166.63	0.0618196	0.955802	same	same
anapc5	ENSDART00000158927	184.848	0.0221621	0.988276	NM_199622.2	183.916	0.0992682	0.92072	TCONS_00121680	189.65	0.082985	0.946862	Ens95 longer	same
and1	ENSDART00000176663	243.981	-0.744976	0.376494	NM_001197254.1	223.027	-0.803454	0.312521	TCONS_00076896	245.647	-0.7077	0.396855	Ens95 longer	same
and2	ENSDART00000114928	381.375	-1.01785	0.265693	NM_001111190.1	345.22	-1.06017	0.224139	TCONS_00053759	389.032	-0.957927	0.2943	Ens95 longer	same
and3	ENSDART00000079449	187.99	0.0970988	0.967744	NM_001025511.1	187.58	0.0937723	0.961747	TCONS_00008920	190.842	0.143083	0.950088	same	same
angpt1	ENSDART00000043713	45.4807	-0.76943	0.463589	NM_131813.1	22.9676	0.106642	0.974016	TCONS_00049357	172.472	-0.762396	0.29896	Ens95 longer	V4 longer
angpt4	ENSDART00000156256	4.19553	-2.67676	0.0705817	XM_005166270.4	7.75708	-1.52362	1	TCONS_00107341	15.5158	-1.61591	0.166059	Ens95 longer	V4 longer
angptl1a	ENSDART00000020999	182.161	-2.05888	9.36614e-05	XM_005160416.4	79.6075	-2.71172	2.9041e-06	TCONS_00055904	185.655	-2.01586	0.000153369	Ens95 longer	same
angptl2a	ENSDART00000067599	19.6363	-2.65109	0.00115013	XM_005168602.4	9.69165	-1.80733	0.206032	TCONS_00098749	15.8019	-2.78537	0.000986614	Ens95 longer	same
angptl2b	ENSDART00000131660	257.412	-1.29131	0.0363076	XM_005167165.4	258.713	-1.30938	0.0290605	TCONS_00118763	264.255	-1.26467	0.0425045	same	same
angptl3	ENSDART00000140004	50.8662	0.761827	0.601246	XM_021476750.1	68.6141	0.582561	0.630201	TCONS_00109251	70.329	0.646876	0.619668	RefSeq longer	same
angptl4	ENSDART00000144149	4266.35	-0.157633	0.910433	NM_001256203.1	4259.79	-0.156543	0.895259	TCONS_00050549	4354.58	-0.115292	0.937961	same	same
angptl6	ENSDART00000018044	10.3237	-1.60078	0.305356	XM_009299794.3	10.3266	-1.65905	0.262479	rna7933	10.6631	-1.57118	0.33866	same	same
angptl7	ENSDART00000038790	198.367	-3.34794	6.77828e-13	NM_001006073.1	185.475	-3.43965	1.83356e-11	TCONS_00119239	203.513	-3.29123	1.67882e-12	same	same
ank1a	ENSDART00000161561				XM_005165647.4	71.5607	-2.43166	4.19624e-09	rna20750	86.2144	-2.26958	1.77069e-08	RefSeq longer	same
ank1a	ENSDART00000171465	68.6804	-2.2458	1.66557e-07	XM_005165649.4	71.5607	-2.43166	4.19624e-09	ENSDART00000171465	86.2144	-2.26958	1.77069e-08	Ens95 longer	same
ank2b	ENSDART00000172082	830.833	-1.68735	0.0156568	NM_001346207.1	774.358	-1.70437	0.0185832	TCONS_00116417	874.72	-1.62731	0.0203368	same	V4 longer
ankar	ENSDART00000100342	20.7103	-0.148588	0.96475	NM_001040046.2	20.709	-0.148831	0.958288	ENSDART00000100342	21.3809	-0.0836339	0.980604	same	same
ankdd1a	ENSDART00000158477	194.661	2.1581	0.00167007	NM_001099248.1	188.837	2.15797	0.00137077	TCONS_00111058	335.887	2.39114	3.4543e-05	same	V4 longer
ankdd1b	ENSDART00000134355	6.4212	-1.29996	0.648707	XM_009301750.3	16.4543	-0.373446	0.832129	TCONS_00100736	16.1545	-0.379856	0.856143	same	same
ankef1a	ENSDART00000153006	14.5645	-1.02985	0.698532	XM_005160755.4	14.2388	-1.07813	0.65192	TCONS_00056844	14.5818	-0.997984	0.725802	same	same
ankef1b	ENSDART00000155509	33.5574	0.395392	0.860273	XM_021467307.1	34.5324	0.492007	0.801773	TCONS_00039333	34.8917	0.413708	0.857615	same	same
ankfy1	ENSDART00000147874	336.107	0.871532	0.187948	XM_005171905.4	335.738	0.869892	0.165637	TCONS_00099800	342.074	0.925716	0.135799	same	same
ankha	ENSDART00000133704	33.7966	-1.12346	0.2693	NM_001030259.2	30.5885	-1.12846	0.268685	TCONS_00076215	34.4951	-1.06386	0.322251	Ens95 longer	same
ankhb	ENSDART00000192611	245.333	-1.07178	0.0956861	NM_194370.1	165.707	-1.13914	0.185125	ENSDART00000192611	251.522	-1.00511	0.123557	Ens95 longer	same
ankhd1	ENSDART00000169072	2210.37	0.560735	0.295835	NM_001199768.1	2209.79	0.556517	0.257962	TCONS_00064046	2254.24	0.597168	0.218047	same	V4 longer
ankib1a	ENSDART00000133628	378.223	0.453244	0.484324	XM_005159781.4	379.188	0.431798	0.46	TCONS_00046904	772.526	0.0942539	0.900481	Ens95 longer	V4 longer
ankib1b	ENSDART00000131227	206.576	0.0311101	0.979981	XM_009292183.3	984.979	0.333381	0.542565	TCONS_00034465	1004.15	0.383204	0.464045	RefSeq longer	same
ankk1	ENSDART00000079504	5.1783	-1.28609	0.711433	NM_001130665.1	5.17761	-1.2866	1	TCONS_00027808	87.3341	-0.49217	0.748264	same	V4 longer
ankle2	ENSDART00000145210	44.4908	-0.689166	0.574132	XM_005165080.4	144.949	-0.978677	0.0980943	TCONS_00102381	148.366	-0.924048	0.135828	RefSeq longer	same
ankmy1	ENSDART00000141528	52.933	0.511886	0.748256	XM_692348.8	60.978	0.312569	0.820698	TCONS_00068473	44.5404	0.505045	0.77074	same	same
ankmy2a	ENSDART00000003674	209.203	0.244669	0.78101	NM_199894.1	139.113	-0.134366	0.909352	TCONS_00030848	273.891	-0.0998958	0.924901	same	V4 longer
ankra2	ENSDART00000134795	374.741	-0.27908	0.760271	NM_213129.2	374.117	-0.283612	0.72324	TCONS_00099997	382.058	-0.225664	0.804353	same	same
ankrd10a	ENSDART00000053926	153.04	-1.08032	0.254169	NM_200980.1	140.891	-1.13646	0.216362	TCONS_00001166	198.113	-0.978342	0.280945	Ens95 longer	same
ankrd10b	ENSDART00000102562	335.764	-0.0765004	0.941342	XM_005167452.4	325.889	-0.105002	0.896247	TCONS_00122798	477.673	-0.148335	0.855977	same	same
ankrd12	ENSDART00000146037	3213.15	0.477201	0.413772	XM_017357915.1	4872.69	0.451704	0.381941	TCONS_00052069	4977.23	0.498592	0.337124	Ens95 longer	V4 longer
ankrd13b	ENSDART00000015286	36.7869	-0.44532	0.753377	NM_001030229.2	28.701	-0.282049	0.847432	TCONS_00028085	43.6198	-0.291421	0.849305	Ens95 longer	V4 longer
ankrd13c	ENSDART00000182042	1169.63	0.0996007	0.896304	NM_214690.1	1140.79	0.123613	0.840457	TCONS_00014389	1196.22	0.154993	0.811776	Ens95 longer	same
ankrd13d	ENSDART00000170784	75.0308	-0.94914	0.303999	XM_009291049.3	84.4123	-0.851701	0.311453	TCONS_00023728	86.1407	-0.796692	0.380397	same	same
ankrd16	ENSDART00000037600	59.9113	-0.177606	0.899166	NM_001017563.2	53.1734	-0.2503	0.832129	rna9090	61.295	-0.0978421	0.950317	same	same
ankrd1a	ENSDART00000112959	18.0928	-2.07431	0.0553347	XM_001920057.5	20.3448	-1.92296	0.0834149	rna45703	20.3785	-1.90441	0.107849	same	same
ankrd1b	ENSDART00000113810	13.8942	1.10634	0.739399	NM_001102388.1	13.8978	1.10662	1	TCONS_00014973	14.2371	1.13933	0.741501	same	same
ankrd22	ENSDART00000028003	105.861	0.0812985	0.97984	NM_200274.1	106.19	0.100251	0.968618	TCONS_00014998	108.932	0.134885	0.964786	same	same
ankrd28b	ENSDART00000027020	1186.49	0.767675	0.112658	XM_009292265.3	1134.68	0.821216	0.0853988	TCONS_00032316	1208.51	0.813862	0.0647595	Ens95 longer	same
ankrd29	ENSDART00000009360	35.8303	-0.472173	0.760271	NM_001020760.1	35.5036	-0.485613	0.724563	TCONS_00066422	36.2018	-0.421518	0.793004	same	same
ankrd31	ENSDART00000074638	5.16286	-0.393806	0.944651	NM_001017911.1	5.16286			TCONS_00100838	5.17001	-0.393274	0.947736	Ens95 longer	same
ankrd33ab	ENSDART00000023686	13.2694	-2.37551	0.123684	XM_021477211.1	13.2686	-2.36852	0.119895	TCONS_00106869	13.6095	-2.31993	0.16022	RefSeq longer	Ens95/RefSeq longer
ankrd33ba	ENSDART00000132390	14.8895	-1.01549	0.731826	XM_691590.8	14.5641	-1.29001	0.605019	TCONS_00074980	31.3365	-2.02885	0.0224679	Ens95 longer	V4 longer
ankrd37	ENSDART00000103236	10.2772	-1.46737	0.519369	NM_001145614.1	10.2836	-1.46638	0.495498	TCONS_00000741	59.3712	-0.0189059	0.990645	same	V4 longer
ankrd39	ENSDART00000147878	51.7215	1.17468	0.437336	XM_005167331.3	51.3993	1.16558	0.410488	rna28626	52.1099	1.20373	0.429506	same	same
ankrd40	ENSDART00000112384	301.553	-0.0058287	0.996926	XM_001341341.8	299.017	-0.00418386	0.99724	TCONS_00081980	308.139	0.0512413	0.963154	Ens95 longer	same
ankrd45	ENSDART00000002094	8.37751	-1.91575	0.348465	NM_001020770.1	8.69562	-1.70648	0.414063	TCONS_00051158	8.3903	-1.77671	0.437974	same	same
ankrd46a	ENSDART00000192901	657.154	0.326383	0.654897	XM_002666073.6	35.2359	0.887036	0.588446	TCONS_00065014	669.059	0.377074	0.548004	Ens95 longer	same
ankrd46b	ENSDART00000022918	110.157	-0.820761	0.266465	XM_005166503.3	109.852	-0.8225	0.241617	TCONS_00116139	112.583	-0.762511	0.310873	same	same
ankrd49	ENSDART00000033263	79.357	0.127942	0.926287	NM_001017584.2	72.2583	0.339294	0.749478	TCONS_00029198	81.0825	0.182922	0.885431	Ens95 longer	same
ankrd50l	ENSDART00000020798	453.744	1.50073	0.00498382	XM_009304798.3	453.756	1.50954	0.00415766	TCONS_00123871	476.321	1.537	0.00304263	same	V4 longer
ankrd52a	ENSDART00000032861	69.0987	0.232113	0.895611	NM_001018154.1	69.0943	0.232345	0.877766	TCONS_00073589	2770.96	0.0203407	0.980153	same	V4 longer
ankrd54	ENSDART00000078137	366.63	-0.0535888	0.959474	NM_001002578.1	366.71	-0.0459036	0.957252	TCONS_00082425	375.251	0.00259065	0.998853	same	same
ankrd55	ENSDART00000185929	16.45	-2.34982	0.011172	XM_001345383.6	16.1275	-2.45948	0.00796944	TCONS_00008188	16.4743	-2.4099	0.0112091	same	same
ANKRD66	ENSDART00000155643	1.93036	-1.80834	0.634483	NM_001327906.1	0	-4.66401	1	TCONS_00039051	1.93367	-1.80891	1	Ens95 longer	same
ankrd6a	ENSDART00000155711	21.319	-0.603155	0.813209	XM_021467384.1	22.2838	-0.595752	0.784923	TCONS_00039570	58.4634	-0.967269	0.475653	Ens95 longer	V4 longer
anks1ab	ENSDART00000153704	85.9754	0.752293	0.46223	XM_005166150.4	542.476	1.39481	0.00816013	TCONS_00107446	554.201	1.46033	0.00492754	RefSeq longer	same
anks1b	ENSDART00000133509	4849.42	2.64154	9.03093e-09	XM_009300300.3	5214.12	2.66051	2.33067e-09	TCONS_00094057	5450.77	2.6989	2.99453e-10	same	V4 longer
anks3	ENSDART00000131342	117.407	-0.131122	0.924837	NM_001114565.1	117.074	-0.134943	0.906596	TCONS_00077374	119.189	-0.0926475	0.949606	same	same
anks4b	ENSDART00000053494	85.1122	-0.579931	0.56908	NM_001002188.1	55.1096	-0.607075	0.582041	TCONS_00087421	89.417	-0.510677	0.640197	Ens95 longer	same
ankzf1	ENSDART00000124957	192.959	-0.464105	0.56319	XM_005167493.4	240.707	-0.365202	0.619521	ENSDART00000124957	220.052	-0.358267	0.66371	same	same
anln	ENSDART00000113574	453.23	0.507181	0.486918	NM_001102676.2	452.978	0.516855	0.429765	TCONS_00049028	463.257	0.557831	0.41359	same	same
ano10a	ENSDART00000126041	624.273	0.226379	0.813977	NM_001030206.1	624.7	0.229302	0.782485	TCONS_00031818	639.096	0.263404	0.772205	same	V4 longer
ano10b	ENSDART00000133789	465.748	0.766926	0.123962	NM_001077382.1	465.427	0.760861	0.105244	ENSDART00000133789	471.894	0.806137	0.0748747	same	same
ano11	ENSDART00000139514	18.3133	-1.56605	0.281265	XM_009296915.3	68.4112	-0.620447	0.571897	ENSDART00000139514	19.3123	-1.46539	0.348697	RefSeq longer	Ens95/RefSeq longer
ano2	ENSDART00000164810	87.4112	-1.62143	0.0174668	NM_001327858.1	43.9227	-0.324249	0.849591	TCONS_00087751	89.1505	-1.57012	0.0221688	Ens95 longer	same
ano3	ENSDART00000155721	71.3128	-0.768401	0.391447	XM_017354216.2	70.9814	-0.820511	0.318257	TCONS_00079282	170.418	-1.18122	0.0129629	same	V4 longer
ano5b	ENSDART00000141828	1354.19	1.70693	6.5996e-05	XM_005168891.4	1345.51	1.71917	3.95356e-05	TCONS_00115338	1379.36	1.75446	1.3758e-05	same	same
ano6	ENSDART00000139586	86.2939	0.57835	0.621396	XM_005164462.4	97.5946	1.05084	0.232726	TCONS_00092936	121.615	0.703685	0.427174	Ens95 longer	V4 longer
ano8b	ENSDART00000108628	99.9442	-0.197464	0.844618	XM_021479701.1	97.38	-0.0985335	0.918441	TCONS_00012587	414.811	-0.490475	0.372188	Ens95 longer	V4 longer
ano9a	ENSDART00000115210		1.298	0.0425323	XM_001921933.7	112.87	2.14557	0.000650969	TCONS_00080989	170.21	1.32598	0.0349479	Ens95 longer	same
ano9b	ENSDART00000115420	71.5073	-0.510571	0.724208	XM_001922625.7	66.6837	-0.517071	0.693229	TCONS_00112279	73.2283	-0.446488	0.769758	Ens95 longer	same
anos1a	ENSDART00000007522	384.247	-0.520355	0.559468	NM_131358.1	385.345	-0.521288	0.520655	TCONS_00001286	395.18	-0.457269	0.621348	same	same
anos1b	ENSDART00000003736	59.0432	-2.3345	5.18893e-06	NM_131379.2	59.3698	-2.33421	3.89466e-06	ENSDART00000003736	59.4466	-2.30268	7.34746e-06	same	same
anp32e	ENSDART00000077059	2521.92	-0.23719	0.807821	NM_213277.1	2525.89	-0.233565	0.784104	ENSDART00000077059	2587.45	-0.17586	0.862155	same	same
ANPEP	ENSDART00000175736	0	-5.98966	0.0384236	XM_001920383.7	0	-6.06985	1	TCONS_00078149	0.323125	-5.06812	0.0794847	Ens95 longer	same
anpepa	ENSDART00000060196	22.25	-0.879642	0.533242	NM_001044861.1	21.9314	-0.900431	0.491646	TCONS_00044078	22.2833	-0.845429	0.569405	same	same
anpepb	ENSDART00000167730	52.3455	1.17083	0.426289	NM_001089325.1	52.3495	1.17097	0.393195	TCONS_00078147	53.0581	1.22914	0.403256	same	same
antxr1b	ENSDART00000114966	15.8535	-0.360726	0.901982	XM_679053.7	13.5896	-0.360665	1	TCONS_00007642	44.3502	-1.09076	0.423648	Ens95 longer	V4 longer
antxr1c	ENSDART00000093113	695.905	-0.178145	0.854993	XM_687270.7	75.7691	0.664499	0.667788	TCONS_00014529	710.792	-0.134954	0.892687	Ens95 longer	V4 longer
antxr1d	ENSDART00000143308	2.57536	-3.13276	0.0936414	XM_686496.6	14.5426	-0.915727	0.600856	TCONS_00020127	14.8818	-0.884561	0.653217	RefSeq longer	same
antxr2a	ENSDART00000171557	863.105	2.04435	1.50358e-06	NM_001044709.2	1899.88	0.400116	0.542565	TCONS_00103698	2352.65	0.631818	0.243895	Ens95 longer	same
ANXA1_1_of_many	ENSDART00000180023	146.183	-0.0136716	0.994332	NM_001017605.1	146.515	-0.010463	0.995171	TCONS_00104712	148.971	0.0395375	0.982551	same	same
anxa11a	ENSDART00000101775	2684.79	1.11169	0.044354	NM_181765.2	2671.91	1.1117	0.0372013	TCONS_00019240	2734.12	1.15807	0.0276535	same	same
anxa11b	ENSDART00000149089	3073.67	1.02583	0.00545004	NM_181766.2	3052.8	1.02623	0.00339663	ENSDART00000149089	3134.28	1.0776	0.000914486	same	same
anxa13	ENSDART00000013294	4467.1	2.499	4.41347e-07	NM_131774.2	3914.01	2.57497	4.30822e-07	TCONS_00076069	4536.23	2.54591	6.2673e-08	Ens95 longer	same
anxa13l	ENSDART00000018408	377.98	0.0280262	0.97984	XM_005171170.4	364.399	0.0134682	0.988572	TCONS_00049889	386.594	0.0827996	0.927972	same	V4 longer
anxa1b	ENSDART00000158856	366.751	-0.440545	0.711282	NM_181759.1	366.44	-0.438192	0.679438	TCONS_00104724	373.407	-0.387215	0.748593	same	same
anxa2a	ENSDART00000182856	4996	1.33978	0.0256758	NM_181761.2	4934.37	1.33414	0.0219096	TCONS_00079173	5078.52	1.38334	0.0164324	Ens95 longer	same
anxa3a	ENSDART00000004286	98.3283	-0.382124	0.830252	NM_001004632.1	98.639	-0.374148	0.812374	TCONS_00100291	100.407	-0.325688	0.860231	same	same
anxa4	ENSDART00000141657	2224.17	0.848284	0.130474	NM_181764.3	2222.94	0.85029	0.109317	TCONS_00007647	2266.41	0.895686	0.0870247	same	same
anxa5a	ENSDART00000032342	22.8293	-2.33075	0.116945	NM_001113582.1	22.5132	-2.34649	0.109585	TCONS_00024599	23.1901	-2.28966	0.150694	same	same
anxa5b	ENSDART00000019698	1039.36	-0.277042	0.679003	NM_181757.2	1028.49	-0.281139	0.627407	TCONS_00000906	1111.38	-0.187702	0.779438	same	same
anxa6	ENSDART00000148882	25.1271	-1.80432	0.0264523	NM_001002038.2	25.1328	-1.7984	0.0254691	TCONS_00024655	25.8095	-1.84501	0.028662	same	same
aoc1	ENSDART00000087422	18.9551	-1.23242	0.578304	NM_001077598.1	18.965	-1.22147	0.555283	TCONS_00077538	19.6321	-1.15229	0.631691	same	same
ap1ar	ENSDART00000167145	229.78	-0.311382	0.693434	NM_001301369.1	80.3267	0.412341	0.697731	TCONS_00023180	238.204	-0.254769	0.75005	Ens95 longer	V4 longer
ap1b1	ENSDART00000137128	2869.2	1.18491	0.00138946	XM_005165166.3	2873.17	1.18763	0.000852923	TCONS_00102800	2935.99	1.24027	0.000201803	same	same
ap1g1	ENSDART00000170714	1670.77	0.607387	0.264751	XM_017356815.2	3070.81	0.499235	0.312595	TCONS_00116723	3135.43	0.549335	0.245472	RefSeq longer	same
ap1g2	ENSDART00000167274	393.497	-0.0447142	0.974264	NM_001289858.1	335.913	-0.00678792	0.995803	ENSDART00000167274	364.096	0.0073904	0.995223	Ens95 longer	same
ap1m1	ENSDART00000166920	2051.96	0.971896	0.0362546	NM_001331127.1	2049.66	0.971642	0.0276194	TCONS_00052095	2164.65	1.06845	0.00890527	same	same
ap1m2	ENSDART00000034505	113.989	-0.576474	0.604576	NM_205714.1	146.284	-0.54384	0.565581	ENSDART00000034505	149.997	-0.50327	0.63619	same	same
ap1m3	ENSDART00000057732	8.37346	-0.976394	0.741366	XM_021476834.1	8.6942	-0.892721	1	TCONS_00106640	171.187	-0.625734	0.501676	same	V4 longer
ap1s1	ENSDART00000190369	317.937	-0.134726	0.914543	NM_001328014.1	317.599	-0.133794	0.898666	TCONS_00114991	330.666	-0.0616371	0.962818	same	same
ap1s2	ENSDART00000054837	1046.82	0.419709	0.465321	NM_205558.1	1046.92	0.424112	0.412096	TCONS_00010685	1069.35	0.471802	0.35575	same	same
ap1s3a	ENSDART00000171305	0.641311	-3.86248	0.21973	XM_009291950.3	0.642015	-4.00386	1	TCONS_00031275	26.5374	0.0742933	0.978834	RefSeq longer	V4 longer
ap1s3b	ENSDART00000038228	542.854	1.4792	0.0481141	NM_001004635.1	542.422	1.48045	0.0420988	TCONS_00054728	552.343	1.53071	0.0373781	same	same
ap2a1	ENSDART00000155967	2333.53	0.730763	0.176402	XM_005164062.4	2335.62	0.733769	0.145744	TCONS_00082730	2382.04	0.781372	0.107419	same	same
ap2b1	ENSDART00000171248	1109.41	-0.312449	0.700478	NM_199919.2	1105.08	-0.305899	0.676015	TCONS_00101237	1136.93	-0.253175	0.761115	same	same
ap2m1a	ENSDART00000046587	6666.73	1.11583	0.00710208	NM_001291355.1	6662.09	1.11757	0.00490512	TCONS_00052708	6794.47	1.16662	0.00189776	same	same
ap2m1b	ENSDART00000151112	125.891	-0.322221	0.792463	XM_005159256.4	2832.7	0.136444	0.870311	rna48328	2891.01	0.189768	0.832248	RefSeq longer	same
ap2s1	ENSDART00000033871	2660.29	0.880925	0.123962	NM_213155.2	2687.67	0.89342	0.0989965	TCONS_00027260	2707.31	0.930559	0.0768344	same	same
ap3d1	ENSDART00000160165	509.009	0.982741	0.0983224	XM_009296263.3	559.904	0.913356	0.10291	TCONS_00068941	577.198	0.936497	0.0871235	RefSeq longer	V4 longer
ap3m1	ENSDART00000039640	204.6	0.215752	0.849382	XM_009307281.3	204.279	0.216189	0.825078	TCONS_00019710	209.103	0.271755	0.798816	same	same
ap3m2	ENSDART00000026120	218.879	-1.17128	0.0757412	NM_001002154.1	219.271	-1.16596	0.0691361	TCONS_00102250	224.709	-1.10602	0.0975943	same	same
ap3s2	ENSDART00000058339	307.716	-0.0957442	0.924107	NM_001002539.1	301.297	-0.0830394	0.922528	TCONS_00078144	314.955	-0.0386044	0.970446	same	same
ap4b1	ENSDART00000018230	132.308	0.564128	0.555449	NM_200338.1	129.392	0.558339	0.520718	TCONS_00069704	143.164	0.609972	0.512868	same	V4 longer
ap4e1	ENSDART00000163839	164.638	0.27317	0.768948	XM_693950.7	165.303	0.313761	0.694328	TCONS_00077896	168.758	0.331113	0.705905	same	same
ap4m1	ENSDART00000079437	108.405	0.282987	0.792084	NM_001002672.1	108.091	0.258053	0.787655	TCONS_00006748	110.171	0.314846	0.761115	same	same
ap4s1	ENSDART00000135752	204.742	0.409966	0.714279	XM_005158761.4	197.317	0.43726	0.655675	TCONS_00040118	208.912	0.460938	0.664064	Ens95 longer	same
ap5b1	ENSDART00000113185	93.1739	-0.445635	0.601157	NM_001326456.1	92.8527	-0.428371	0.581194	TCONS_00014086	95.2467	-0.393577	0.647448	same	same
ap5m1	ENSDART00000142123	99.2467	0.243098	0.844618	NM_001020654.1	106.053	0.316624	0.743625	TCONS_00038364	108.46	0.37993	0.715049	same	same
apaf1	ENSDART00000019165	523.932	1.46248	0.00241596	XM_005164770.4	233.835	1.52853	0.00336274	TCONS_00088633	575.764	1.49502	0.00108818	Ens95 longer	same
apba1a	ENSDART00000168317	25.0629	-2.65452	0.0278069	XM_001343336.5	26.4584	-1.6099	0.0405704	TCONS_00100913	80.1176	-1.99591	0.000887765	Ens95 longer	V4 longer
apba1b	ENSDART00000140511	154.514	-1.82906	0.0030962	XM_005155586.4	153.917	-1.81594	0.00314033	TCONS_00006365	158.627	-1.76624	0.00512264	same	same
apba2b	ENSDART00000174000	131.648	-2.06998	0.00266416	XM_002662843.6	127.155	-2.11024	0.00353819	TCONS_00112141	135.405	-2.00277	0.00406112	same	same
APBA3	ENSDART00000112590	219.231	0.320287	0.681284	XM_003199417.4	216.012	0.347572	0.605694	ENSDART00000112590	14.8583	-0.836064	0.847789	Ens95 longer	same
apbb1	ENSDART00000136709	48.6702	-0.379555	0.753349	XM_003199317.5	108.302	-0.0108611	0.993203	TCONS_00006377	881.933	0.0033307	0.996899	RefSeq longer	V4 longer
apbb2b	ENSDART00000158344	240.316	1.6034	0.00840682	XM_005168376.4	269.711	1.61912	0.00396846	TCONS_00000842	4123.42	1.80177	7.21869e-06	same	V4 longer
apc	ENSDART00000149956	5239.86	1.04455	0.0135654	NM_001143840.1	5245.19	1.04533	0.010264	TCONS_00005735	5347.25	1.09837	0.00414379	same	same
apcdd1l	ENSDART00000191594	30.9296	-2.46034	3.43722e-05	XM_001341376.5	17.4116	-1.73289	0.123088	ENSDART00000191594	31.6206	-2.40808	7.65422e-05	Ens95 longer	same
apela	ENSDART00000148219	9.00286	-1.63984	0.379804	NM_001297547.1	9.00968	-1.62216	0.365723	ENSDART00000129853	9.34006	-1.57247	0.429506	same	same
apex1	ENSDART00000180644	704.161	-0.0716867	0.947478	NM_001328578.1	690.727	-0.0817862	0.926668	TCONS_00087817	721.366	-0.017542	0.987698	Ens95 longer	same
apex2	ENSDART00000189272	236.251	0.0520218	0.959846	NM_200146.1	192.718	-0.0120083	0.991025	TCONS_00120853	241.442	0.106132	0.903852	Ens95 longer	same
aph1b	ENSDART00000008096	645.018	0.0877338	0.945057	NM_200115.1	646.171	0.098771	0.922792	TCONS_00112039	662.488	0.150502	0.895205	same	same
api5	ENSDART00000152705	982.307	0.0808963	0.926974	NM_199540.2	990.25	0.0850899	0.903971	TCONS_00078999	1012.17	0.137322	0.853726	RefSeq longer	same
apip	ENSDART00000007487	374.217	0.149619	0.895779	NM_001004679.1	368.739	0.183303	0.849656	TCONS_00113066	413.232	0.173832	0.868573	same	V4 longer
apln	ENSDART00000075312	2608.46	0.292935	0.667269	NM_001166124.3	2595.22	0.304166	0.603919	TCONS_00024194	2655.07	0.340978	0.554505	same	same
aplnr2	ENSDART00000167209	28.7505	-0.780675	0.615897	XM_001333480.7	28.4289	-0.957594	0.449048	TCONS_00115683	28.7894	-0.742631	0.646947	RefSeq longer	Ens95/RefSeq longer
aplnra	ENSDART00000074125	3603.48	2.85964	1.44121e-11	NM_001075105.1	3227.04	2.94648	2.5406e-12	TCONS_00121690	3666.67	2.90273	1.11096e-12	Ens95 longer	same
aplnrb	ENSDART00000129643	1152.04	3.25444	2.74096e-12	NM_001030197.2	1142.86	3.25072	1.85322e-12	TCONS_00006114	1170.76	3.30298	1.68773e-13	same	same
aplp1	ENSDART00000157762	275.427	-2.61102	5.11765e-07	XM_001342885.8	275.473	-2.60132	5.52662e-07	TCONS_00028508	281.975	-2.54767	5.49826e-07	Ens95 longer	same
aplp2	ENSDART00000077125	5957.01	1.23302	0.00118482	NM_001123012.1	5958.39	1.23486	0.000791462	TCONS_00044669	6086.56	1.28717	0.000252394	same	same
apmap	ENSDART00000025910	271.194	-0.744141	0.431636	NM_212608.1	182.37	-0.73949	0.502924	TCONS_00018821	324.93	-0.617323	0.46404	Ens95 longer	V4 longer
apnl	ENSDART00000189376	5.1487	-2.19229	0.276375	NM_001293671.1	4.50405	-2.34497	1	TCONS_00085911	5.15722	-2.17256	0.312276	Ens95 longer	same
apoa1a	ENSDART00000012050	135.981	-1.70551	0.587163	NM_131128.1	134.47	-1.71993	0.545476	TCONS_00100207	140.725	-1.6225	0.599757	same	same
apoa1b	ENSDART00000193184	3092.86	0.556151	0.855747	NM_001100144.2	3089.71	0.57438	0.829227	ENSDART00000193184	3207.25	0.638453	0.821094	Ens95 longer	same
apoa2	ENSDART00000135084	1796.73	0.538568	0.856756	NM_001130586.1	1549.51	0.567516	0.836007	TCONS_00032528	1862.09	0.61973	0.83286	Ens95 longer	same
apoa4a	ENSDART00000157589	19.5782	-0.503759	0.87734	XM_021468057.1	20.2363	-0.488626	0.862508	TCONS_00045621	20.2582	-0.456109	0.896015	same	same
apoa4b.1	ENSDART00000175404	121.093	-1.1904	0.707599	NM_001079861.1	121.515	-1.17216	0.521666	ENSDART00000175404	125.819	-1.10284	0.586475	Ens95 longer	same
apoa4b.2	ENSDART00000142168	65.5001	-1.74191	0.604012	XM_021466732.1	56.5718	-1.68174	0.38411	ENSDART00000142168	68.8368	-1.68836	0.412108	same	same
apoa4b.2	ENSDART00000143855				XM_001338001.6	9.95266	-2.15727	0.408639	rna43369	68.8368	-1.68836	0.412108	RefSeq longer	same
apoba	ENSDART00000062793	58.3519	-1.13512	0.0850938	XM_689735.9	58.3595	-1.12778	0.0796232	TCONS_00037956	59.7273	-1.07044	0.107379	same	same
apobb.1	ENSDART00000176187	163.703	-1.06465	0.362698	XM_005160629.3	163.456	-1.04104	0.352437	TCONS_00056649	169.133	-0.987534	0.413675	Ens95 longer	same
apobb.2	ENSDART00000138336	31.9294	-0.491965	0.71752	XM_002665806.5	30.6385	-0.520089	0.66958	TCONS_00057576	32.6208	-0.441818	0.756835	same	same
apobec2a	ENSDART00000148692	32.339	0.714273	0.762703	NM_001013314.2	32.3427	0.762657	0.716927	TCONS_00067547	32.7014	0.728849	0.763813	same	same
apoc1	ENSDART00000145330	305.879	-1.41542	0.623729	NM_001291886.1	307.323	-1.40709	0.58734	rna43377	316.398	-1.33914	0.640987	same	same
apoc2	ENSDART00000175879	69.4527	-1.35609	0.331874	NM_001326448.1	51.7391	-1.3889	0.459574	TCONS_00032531	71.1799	-1.28381	0.381396	Ens95 longer	same
apoc4	ENSDART00000193013	3.52721	-0.938583	0.854666	NM_001135978.1	3.53108	0.456958	1	ENSDART00000193013	3.53428	-1.07048	0.833806	Ens95 longer	same
apoda.1	ENSDART00000084938	251.771	2.07011	0.083144	NM_001076582.2	256.152	2.09497	0.0724116	TCONS_00054170	255.023	2.11754	0.0796035	same	same
apoda.2	ENSDART00000138952	34.3865	-0.471101	0.854043	NM_001201348.1	34.4107	-0.46081	0.838228	TCONS_00051330	35.7339	-0.369143	0.894261	same	same
apodb	ENSDART00000080113	115.733	-0.234688	0.900306	NM_001037695.1	116.071	-0.230769	0.885597	TCONS_00076903	118.163	-0.176815	0.929171	same	same
apoea	ENSDART00000172219	35.6568	-0.943053	0.654228	NM_001020565.1	33.1039	-0.988105	0.660384	TCONS_00045624	36.6863	-0.912113	0.668359	same	same
apoeb	ENSDART00000058965	4850.81	-0.697523	0.42978	XM_005158086.4	4911.59	-0.702311	0.386305	rna43374	5024.75	-0.648777	0.460775	RefSeq longer	same
apof	ENSDART00000153626	374.667	-0.111066	0.944808	XM_021477208.1	374.334	-0.110176	0.933822	ENSDART00000153626	381.002	-0.0594653	0.971223	same	same
apol1	ENSDART00000165085	146.706	0.225074	0.820112	XM_005171301.3	163.149	0.250709	0.762123	TCONS_00051389	166.934	0.305604	0.730016	same	same
apooa	ENSDART00000170158	115.321	0.182228	0.892217	NM_001037115.1	115.345	0.182851	0.873089	TCONS_00101826	138.378	0.142671	0.918097	same	same
apoob	ENSDART00000032963	90.0486	-0.93407	0.396942	NM_001005777.1	223.669	-0.409178	0.578393	TCONS_00076659	92.7769	-0.860288	0.455903	same	same
apool	ENSDART00000057541	144.617	0.312406	0.765635	NM_001014351.1	144.654	0.312851	0.735935	TCONS_00102619	223.565	0.500741	0.529708	same	V4 longer
apopt1	ENSDART00000146234	192.958	0.0819859	0.947334	NM_001145619.1	192.949	0.0820334	0.93542	TCONS_00019222	196.78	0.12878	0.907162	same	same
appa	ENSDART00000167331	14837.2	1.40651	0.00229275	NM_131564.2	14799.6	1.40721	0.00162907	TCONS_00002935	15085.5	1.455	0.000615344	Ens95 longer	same
appb	ENSDART00000125536	5309.91	0.467975	0.469257	NM_152886.1	5585.6	0.518226	0.357953	TCONS_00126587	5545.38	0.542021	0.327034	same	same
appbp2	ENSDART00000002824	153.66	-0.299662	0.809729	NM_212633.1	149.474	-0.312033	0.778123	TCONS_00030248	2339.07	0.278817	0.585288	same	V4 longer
appl2	ENSDART00000112853	752.452	-0.167842	0.81313	XM_005174259.4	60.9272	-0.0602935	0.96837	TCONS_00079702	768.076	-0.115711	0.869869	Ens95 longer	same
appl2	ENSDART00000164208				XM_002667001.5	523.41	0.262297	0.680956	TCONS_00077936	768.076	-0.115711	0.869869	Ens95 longer	same
aprt	ENSDART00000148514	325.603	0.814278	0.297412	NM_200668.1	324.104	0.82302	0.263503	TCONS_00116355	385.642	0.868327	0.231367	same	same
aqp10a	ENSDART00000124718	12.1849	-0.154038	0.976747	NM_001002349.1	12.1983	-0.1178	1	TCONS_00034830	14.1371	0.128828	0.980938	same	V4 longer
aqp10b	ENSDART00000140719	6.78835	0.14134	0.982948	NM_001083047.1	7.75286	-0.418016	1	TCONS_00045434	13.5816	-0.442124	0.892185	same	V4 longer
aqp11	ENSDART00000165002	191.094	-0.44733	0.615567	NM_001327893.1	190.78	-0.447931	0.575438	TCONS_00043380	194.262	-0.400276	0.650269	same	same
aqp12	ENSDART00000063533	55.3399	0.325123	0.852992	NM_001045862.2	55.0452	0.306837	0.843513	TCONS_00067600	57.0422	0.398362	0.817392	same	same
aqp1a.1	ENSDART00000032459	24948.3	4.51957	2.5614e-14	NM_207059.1	24889.3	4.52236	1.77459e-14	TCONS_00049606	25340.2	4.57157	2.21244e-15	Ens95 longer	same
aqp1a.2	ENSDART00000127523	118.638	1.97041	0.0653213	NM_001135682.1	206.121	2.00917	0.0470828	TCONS_00049609	209.969	2.06051	0.0465461	same	same
aqp3a	ENSDART00000009182	1335.04	-0.815796	0.276489	NM_213468.1	1335.56	-0.813606	0.247488	TCONS_00100487	1364.12	-0.761435	0.305802	same	same
aqp4	ENSDART00000011287	2.24459	-2.95772	0.294448	XM_009294620.3	34.5365	-0.618045	0.644859	TCONS_00055948	36.5155	-0.697486	0.617277	RefSeq longer	V4 longer
aqp7	ENSDART00000123522	186.666	3.58931	2.8844e-05	XM_005161011.4	190.512	3.4753	3.46444e-05	TCONS_00060945	205.967	3.01065	0.000341464	RefSeq longer	V4 longer
aqp8a.1	ENSDART00000066382	3894.15	5.60705	2.31138e-15	NM_001004661.1	3889.85	5.60537	2.23789e-15	TCONS_00017348	3965.51	5.66584	8.79509e-16	same	same
aqp8b	ENSDART00000122968	9.35408	-0.75789	0.731854	NM_001114910.3	9.35641	-0.757744	1	TCONS_00085169	9.68925	-0.649031	0.783799	same	same
aqp9b	ENSDART00000075513	267.813	-2.80395	0.00705264	NM_001177744.1	0.643436	-6.42566	0.00107196	TCONS_00112123	275.01	-2.73746	0.0097593	Ens95 longer	same
ar	ENSDART00000098022	91.4286	0.191481	0.912144	NM_001083123.1	194.104	-0.0808986	0.947212	TCONS_00100020	282.064	-0.419303	0.520795	RefSeq longer	V4 longer
araf	ENSDART00000138182	712.457	-0.187864	0.844975	XM_005171817.4	710.417	-0.182714	0.825782	ENSDART00000138182	730.992	-0.131914	0.896215	same	same
arap1a	ENSDART00000142516	41.2604	0.0105751	0.995932	XM_017356249.2	54.1136	0.210574	0.881179	TCONS_00102722	56.43	0.229403	0.889748	RefSeq longer	V4 longer
arap3	ENSDART00000173056	2762.56	4.00416	2.30054e-14	XM_005173181.3	2698.87	4.08577	2.88281e-14	TCONS_00023924	2806.05	4.04404	1.92464e-15	same	V4 longer
arcn1a	ENSDART00000014666	352.517	-0.0266738	0.982682	NM_201459.1	352.242	-0.0265626	0.977097	TCONS_00103186	360.144	0.0281804	0.979623	same	same
arcn1b	ENSDART00000047902	736.744	0.188392	0.790608	NM_201993.1	736.827	0.191456	0.752332	TCONS_00029867	752.682	0.242727	0.691975	same	same
AREL1	ENSDART00000179706	148.847	-0.280784	0.807342	XM_002663035.6	48.4543	0.218692	0.887699	ENSDART00000179706	151.308	-0.230386	0.84464	Ens95 longer	same
arf1	ENSDART00000109319	2722.56	1.35155	0.00266082	NM_201452.2	2632.37	1.36859	0.00135731	TCONS_00052365	2682.33	1.41247	0.000728418	same	same
arf2a	ENSDART00000016407	5528.38	0.609942	0.197844	NM_201504.1	5530.39	0.612424	0.163746	TCONS_00086479	5651.16	0.664944	0.114329	same	same
arf2b	ENSDART00000007381	3074.09	1.03815	0.0166148	NM_201480.1	2998	1.08052	0.00890966	ENSDART00000007381	3058.27	1.12673	0.00516218	same	same
arf2b	ENSDART00000179898		1.03815	0.0166148	NM_201480.1	2998	1.08052	0.00890966	ENSDART00000007381	3058.27	1.12673	0.00516218	Ens95 longer	Ens95/RefSeq longer
arf3a	ENSDART00000103639	20.3174	-2.52238	0.00352142	NM_001003441.1	20.3148	-2.51881	0.00356313	ENSDART00000103639	20.6715	-2.46777	0.00556478	same	same
arf3b	ENSDART00000053775	4.16852	-1.11881	0.807649	XM_005165697.4	5.46281	-1.47636	1	ENSDART00000053775	4.49817	-1.01034	0.839054	RefSeq longer	Ens95/RefSeq longer
arf4a	ENSDART00000067604	476.733	0.820937	0.126337	NM_001003590.1	34.1154	-0.41627	0.78036	TCONS_00012021	510.665	0.841028	0.0960512	Ens95 longer	V4 longer
ARF5_1_of_many	ENSDART00000089963				XM_009306304.3	18.6712	0.394556	0.867079	TCONS_00012019	57.7369	-0.169753	0.914745	same	same
arf5	ENSDART00000103467	3171.37	0.538662	0.313669	NM_199275.1	3111.9	0.519609	0.294071	TCONS_00041470	3234.43	0.592718	0.21168	Ens95 longer	same
arf6a	ENSDART00000160409	3453.56	2.05341	5.64005e-06	NM_199993.1	3448.51	2.05263	3.4464e-06	TCONS_00060251	3511.64	2.09642	1.30731e-06	same	same
arf6b	ENSDART00000074873	2385.61	1.3565	0.00179223	NM_001161375.1	2384.38	1.35734	0.0012912	TCONS_00040790	2432.31	1.40649	0.000584741	same	same
arfgap2	ENSDART00000097328	324.858	1.1793	0.0692092	XM_005159248.3	1563.54	0.732148	0.0908026	TCONS_00042975	1594.79	0.779257	0.0643805	RefSeq longer	same
arfgap3	ENSDART00000156692	168.349	-0.273891	0.81313	NM_205597.1	132.259	-0.209486	0.866051	ENSDART00000156692	173.131	-0.210312	0.864056	Ens95 longer	same
arfgef1	ENSDART00000092783	942.237	0.173828	0.83471	XM_009297394.1	935.273	0.180536	0.803187	TCONS_00076464	1015.8	0.078631	0.934461	Ens95 longer	same
arfgef2	ENSDART00000140866	114.121	-0.229633	0.897842	XM_002666467.5	493.277	-0.313178	0.770709	TCONS_00072746	506.145	-0.255675	0.841704	RefSeq longer	same
arfip2a	ENSDART00000133867	176.114	-0.771126	0.359515	XM_005157358.4	169.365	-0.829143	0.309159	TCONS_00028324	180.582	-0.713128	0.408063	same	same
fhdc3	ENSDART00000079194	2.24459	2.69378	1	NM_001017649.1	50.6083	-0.0111457	0.994673	ENSDART00000182967	240.35	-0.201433	0.82109	same	V4 longer
arfrp1	ENSDART00000157327	68.3902	0.450607	0.735874	NM_001013289.2	65.1193	0.0556157	0.964932	ENSDART00000157327	573.127	0.533689	0.453216	Ens95 longer	same
arg2	ENSDART00000057377	2207.35	1.96171	0.0024694	NM_199611.3	2139.27	1.93855	0.00252474	TCONS_00020198	2254.13	2.00388	0.00208219	Ens95 longer	same
arglu1a	ENSDART00000011910	2234.85	0.189493	0.800573	NM_213216.2	1871.47	0.260261	0.661737	TCONS_00123569	2933.04	0.121878	0.87854	same	V4 longer
arhgap1	ENSDART00000036461	1420.12	0.131786	0.883193	NM_001017781.1	136.952	0.114493	0.903481	TCONS_00112581	1451.91	0.187944	0.809428	Ens95 longer	same
arhgap10	ENSDART00000109314	565.645	0.823703	0.0825504	NM_001045250.1	560.84	0.851356	0.0580854	TCONS_00001453	578.425	0.874552	0.0468697	Ens95 longer	same
arhgap11a	ENSDART00000172408	244.571	-0.173434	0.88114	NM_001193539.1	243.685	-0.15805	0.873565	TCONS_00038801	250.1	-0.159641	0.892572	same	same
arhgap12a	ENSDART00000142804	296.994	-0.26991	0.726981	XM_005171385.4	297.007	-0.273557	0.683827	TCONS_00051573	302.911	-0.227493	0.769979	same	same
arhgap12b	ENSDART00000158440	334.92	-0.972652	0.0948306	XM_009306595.3	332.685	-1.00484	0.0900265	TCONS_00015481	346.719	-0.93227	0.112693	Ens95 longer	same
arhgap15	ENSDART00000144840	77.0206	1.40891	0.214821	XM_005167522.4	112.803	0.967002	0.344245	TCONS_00125980	115.513	1.03144	0.335533	RefSeq longer	same
arhgap17a	ENSDART00000186783	287.095	2.4567	0.0017744	NM_001017592.1	364.879	2.50591	0.00113579	TCONS_00015189	1266.68	2.359	3.66771e-05	same	same
si:ch211-246e12.3	ENSDART00000180967	264.743	1.71501	0.00180797	XM_009299322.3	679.302	1.73418	0.000250823	ENSDART00000143892	132.005	1.8029	0.00329091	RefSeq longer	Ens95/RefSeq longer
arhgap19	ENSDART00000133537	12.5461	-0.213765	0.954088	XM_003201138.5	146.415	0.333583	0.68877	TCONS_00069441	243.379	-0.425028	0.548192	RefSeq longer	V4 longer
arhgap21b	ENSDART00000134083	755.985	-0.22432	0.750838	XM_001918933.6	766.054	-0.214128	0.726762	TCONS_00049995	780.984	-0.169939	0.805932	same	same
arhgap23a	ENSDART00000155894	1125.72	-0.181141	0.820017	XM_003198148.5	1203.52	-0.131368	0.851583	TCONS_00086625	1158.72	-0.123232	0.878275	same	same
arhgap23b	ENSDART00000147422	57.2866	-0.76018	0.62289	XM_685638.9	46.3303	-1.07607	0.537795	TCONS_00014923	58.9898	-0.798634	0.607398	Ens95 longer	same
arhgap27	ENSDART00000161076	45.4909	-0.0722471	0.974076	XM_002663903.6	40.3676	0.52229	0.739973	TCONS_00014609	305.94	0.412808	0.578231	Ens95 longer	V4 longer
arhgap27l	ENSDART00000181506	2623.98	3.2629	1.0421e-08	XM_005171602.4	2616.99	3.30071	4.07359e-08	ENSDART00000181506	2671.58	3.30345	2.52376e-09	Ens95 longer	same
arhgap28	ENSDART00000169643	34.829	0.893524	0.578111	NM_001007435.1	39.6595	0.769423	0.574691	ENSDART00000169643	40.6881	0.804728	0.58888	same	same
arhgap29a	ENSDART00000154077	1627.46	3.64789	3.36986e-18	XM_005162826.4	3041.18	4.14065	1.08278e-28	TCONS_00075205	3036.19	4.17187	2.34562e-30	RefSeq longer	V4 longer
arhgap31	ENSDART00000134386	673.207	3.01323	7.28378e-06	XM_005165631.4	846.659	2.81201	1.46135e-05	TCONS_00104891	10102.7	3.33516	2.49246e-12	RefSeq longer	V4 longer
arhgap32a	ENSDART00000152428	95.3827	-1.43624	0.0278402	XM_021466381.1	80.8811	-1.66526	0.00359283	ENSDART00000152428	98.752	-1.37575	0.0381175	Ens95 longer	same
arhgap35a	ENSDART00000090675	992.443	-0.140763	0.869108	XM_001343600.5	993.483	-0.140099	0.846572	TCONS_00029440	1014.58	-0.0850643	0.923977	same	same
arhgap35b	ENSDART00000084819	475.698	0.315115	0.751232	XM_021476553.1	801.255	-0.200072	0.803905	TCONS_00103573	820.393	-0.145115	0.877633	RefSeq longer	same
arhgap36	ENSDART00000193947	149.346	0.231084	0.82593	XM_009303441.3	180.604	0.393041	0.642613	TCONS_00116165	245.88	0.228834	0.802263	RefSeq longer	V4 longer
arhgap42a	ENSDART00000079145	634.605	0.712847	0.281386	NM_001202443.2	633.258	0.710986	0.248038	TCONS_00061664	644.519	0.758857	0.208863	same	same
arhgap4a	ENSDART00000145307	89.8462	0.782586	0.589759	XM_005162155.4	117.931	0.694738	0.608103	TCONS_00070877	121.28	0.758482	0.605866	RefSeq longer	same
arhgap4b	ENSDART00000138792	226.552	1.2637	0.134914	XM_005162108.2	977.048	1.26264	0.0121745	TCONS_00072712	999.527	1.31871	0.00858569	RefSeq longer	same
arhgap5	ENSDART00000086696	1138.27	0.13137	0.858984	XM_001335980.5	1135.17	0.144648	0.814286	TCONS_00037996	1162.21	0.183361	0.775207	Ens95 longer	same
ARHGAP6	ENSDART00000182140	81.959	1.31496	0.225859	XM_017354543.2	81.959	1.46222	0.00200783	TCONS_00128552	83.6891	1.34362	0.227754	Ens95 longer	same
arhgdia	ENSDART00000064311	10275.4	1.83935	0.00047781	NM_213461.1	10272.9	1.84093	0.000370963	ENSDART00000064311	10484.4	1.88964	0.000224272	same	same
arhgdig	ENSDART00000019004	5514.97	1.77349	0.000252208	NM_201157.1	4919.37	1.94866	0.000112236	TCONS_00082514	5630.44	1.82949	7.38627e-05	Ens95 longer	same
arhgef10la	ENSDART00000163958	71.7713	-2.58617	7.50358e-05	XM_009306101.3	26.719	-1.74829	0.153275	TCONS_00013671	109.673	-2.29773	3.10533e-06	Ens95 longer	same
arhgef12a	ENSDART00000040542	685.648	0.48653	0.38533	XM_009291731.3	626.368	0.522394	0.328179	TCONS_00027833	706.349	0.537147	0.290666	Ens95 longer	same
arhgef12b	ENSDART00000161230	2680.16	1.95807	1.48798e-07	XM_009301885.3	2897.36	1.95645	1.49375e-07	TCONS_00104541	2785.51	2.03152	8.6882e-09	same	same
arhgef15	ENSDART00000158981	15.7607	-2.38167	0.1339	XM_017356341.2	0.321008	-6.58587	0.000238731	ENSDART00000158981	16.1088	-2.32286	0.173946	Ens95 longer	same
arhgef16	ENSDART00000142979	74.3648	-0.805429	0.429964	XM_005167281.4	112.13	-0.610461	0.502877	TCONS_00119280	115.503	-0.575565	0.570579	same	V4 longer
ARHGEF17	ENSDART00000175226	272.774	-0.920986	0.126467	XM_003200414.5	32.5427	-0.86925	0.605806	TCONS_00043370	280.255	-0.875761	0.131779	Ens95 longer	same
arhgef18a	ENSDART00000025841	123.065	-0.755834	0.256936	XM_005171284.4	136.637	-0.712438	0.25949	TCONS_00054199	147.161	-0.609702	0.365974	RefSeq longer	V4 longer
arhgef18b	ENSDART00000145229	19.999	-0.830255	0.572985	XM_005174008.4	246.572	-0.297962	0.639281	TCONS_00068261	252.383	-0.260151	0.719213	RefSeq longer	same
arhgef19	ENSDART00000133269	1.93607	-3.17241	0.242573	XM_005162208.4	71.5835	-0.937413	0.19038	ENSDART00000133269	1.93875	-3.17159	0.279357	RefSeq longer	Ens95/RefSeq longer
arhgef1a	ENSDART00000059102	2006.1	2.8521	9.0097e-13	NM_001081631.2	2034.87	2.80075	6.28266e-13	TCONS_00047808	2056.43	2.90773	1.68706e-14	same	same
arhgef1b	ENSDART00000139355	3119.37	0.867734	0.0268348	XM_017351352.2	3148.97	0.873264	0.0182431	TCONS_00035082	3213.98	0.923605	0.0085538	same	same
arhgef2	ENSDART00000078306	120.876	0.0157272	0.992621	XM_005157849.4	88.3043	0.199153	0.868447	TCONS_00031769	1596.13	0.297717	0.59998	Ens95 longer	V4 longer
arhgef25b	ENSDART00000148531	39.5751	-0.873147	0.617579	XM_021477209.1	112.132	-0.971885	0.188443	TCONS_00109549	114.845	-0.9328	0.233866	RefSeq longer	same
arhgef28	ENSDART00000085086	117.584	-0.306632	0.833335	XM_021476529.1	78.1684	-0.0361893	0.982968	ENSDART00000085086	119.355	-0.26389	0.860231	Ens95 longer	same
arhgef3	ENSDART00000025482	27.4621	2.82268	0.314758	XM_005161867.4	423.8	3.30102	7.55954e-07	TCONS_00067413	430.558	3.35537	4.37374e-07	RefSeq longer	same
arhgef33	ENSDART00000154880	8.0346	-1.82219	0.364624	XM_009293066.3	51.3216	-1.10289	0.306611	TCONS_00039927	51.721	-1.06438	0.358773	RefSeq longer	same
arhgef37	ENSDART00000106039	25.1051	-0.899555	0.512983	XM_021481158.1	25.1113	-0.898999	0.482789	TCONS_00023871	187.623	-0.172542	0.847789	same	V4 longer
arhgef38	ENSDART00000112263	39.6305	-0.885392	0.436074	XM_009291612.3	43.1836	-0.940851	0.345138	TCONS_00001057	40.9781	-0.967178	0.388115	RefSeq longer	same
arhgef39	ENSDART00000127150	196.135	1.21291	0.0325949	NM_001328589.1	195.82	1.29006	0.0180552	TCONS_00093633	199.642	1.25893	0.0221779	Ens95 longer	same
arhgef3l	ENSDART00000138936	174.275	1.65334	0.128631	XM_005162073.4	186.262	1.63578	0.0878594	TCONS_00070596	202.285	1.6332	0.104807	same	V4 longer
arhgef4	ENSDART00000057216	644.02	-1.18301	0.00872173	XM_009298440.3	641.537	-1.19337	0.00680411	TCONS_00052967	677.255	-1.12085	0.0104774	same	V4 longer
arhgef40	ENSDART00000110330	54.1874	-0.35233	0.828664	XM_001919569.7	54.1789	-0.352289	0.806736	TCONS_00113857	55.2322	-0.312532	0.854043	same	same
arhgef6	ENSDART00000148550	528.764	-0.420174	0.545713	XM_005173222.4	523.734	-0.429914	0.488179	rna39759	542.778	-0.364659	0.604688	same	same
arhgef7a	ENSDART00000182266	238.239	-0.730792	0.336424	XM_005167563.4	254.652	-1.4387	0.0263608	ENSDART00000182266	276.528	-1.35963	0.047804	Ens95 longer	same
arhgef7b	ENSDART00000108528	3624.2	2.28333	1.12635e-11	NM_001008624.1	3632.34	2.27597	3.0941e-12	ENSDART00000108528	3704.33	2.33185	3.58565e-14	same	same
arhgef9a	ENSDART00000143878	45.9734	-0.995593	0.433631	XM_001923406.5	115.251	-0.786351	0.398105	TCONS_00102560	118.29	-0.727223	0.477892	RefSeq longer	same
arhgef9b	ENSDART00000146113	4056.55	4.45419	1.15835e-13	NM_001161663.2	4438.67	4.37564	5.91633e-15	TCONS_00025278	4395.9	4.4262	1.39026e-15	same	same
arid1aa	ENSDART00000159969	1774.6	-0.160069	0.848321	XM_021466949.1	1786.96	-0.153279	0.830209	TCONS_00033025	1845.42	-0.102925	0.905642	same	V4 longer
arid1ab	ENSDART00000182732	1958.31	-0.321028	0.624103	XM_021468300.1	1928.8	-0.310759	0.59205	TCONS_00045730	2003.55	-0.265328	0.687335	Ens95 longer	same
arid1b	ENSDART00000164274	1595.62	0.0756894	0.929628	NM_001346214.1	1598.65	0.077761	0.91025	ENSDART00000164274	1627.96	0.129825	0.851885	same	same
arid2	ENSDART00000019144	1122.58	0.0176526	0.985895	XM_005164457.4	1122.71	0.0162301	0.981764	TCONS_00092913	1148.12	0.0668246	0.929171	same	V4 longer
arid3b	ENSDART00000165603	1999.84	0.847035	0.122566	XM_005163128.4	2000.25	0.848283	0.102046	TCONS_00080747	2037.89	0.894719	0.0786516	same	same
arid3c	ENSDART00000097546	187.11	2.04767	0.0330134	XM_005165358.4	2675.87	1.61451	0.0018164	rna19544	2723.12	1.66171	0.000993846	RefSeq longer	same
arid4a	ENSDART00000151847	2784.22	0.62174	0.162785	XM_005158629.4	2855.32	0.598745	0.148078	ENSDART00000151847	2891.29	0.662772	0.089583	same	same
arid5a	ENSDART00000115398	22.938	0.340801	0.890202	NM_001327774.1	22.6106	0.319933	0.881179	TCONS_00119504	45.1967	0.219651	0.886968	same	V4 longer
arid5b	ENSDART00000152180	268.484	-0.72517	0.293668	XM_017358618.1	328.335	-0.65229	0.241911	TCONS_00014712	335.847	-0.599893	0.318101	RefSeq longer	Ens95/RefSeq longer
arid6	ENSDART00000142431	45.0658	0.601376	0.729803	NM_001080201.1	45.4123	0.61228	0.694594	TCONS_00060877	144.611	0.573774	0.685992	same	V4 longer
arih1	ENSDART00000019581	271.517	-0.307783	0.693611	NM_199758.1	271.203	-0.301213	0.661737	TCONS_00041941	924.912	-0.318019	0.566472	same	V4 longer
arih1l	ENSDART00000053535	693.693	0.277592	0.699638	NM_212923.1	71.6096	0.284724	0.808475	TCONS_00111050	710.508	0.333202	0.597735	Ens95 longer	same
arih2	ENSDART00000004521	909.821	0.549028	0.261788	NM_213143.1	909.222	0.549678	0.217708	TCONS_00118308	927.59	0.59851	0.160244	same	same
arl1	ENSDART00000183590	864.083	0.226531	0.793866	NM_001002473.1	538.156	0.191206	0.823157	TCONS_00093247	885.413	0.281431	0.728702	Ens95 longer	same
arl13b	ENSDART00000102184	240.381	-0.417995	0.634318	NM_173272.1	235.891	-0.33832	0.683933	TCONS_00001338	246.197	-0.361793	0.678074	same	same
arl14	ENSDART00000092190	2.25471	-2.28536	0.425901	NM_001099983.1	2.25416	-2.28589	1	TCONS_00052554	47.1896	-0.186524	0.915462	same	same
arl14ep	ENSDART00000001376	424.301	-0.197818	0.842592	NM_001080753.1	415.636	-0.223729	0.794511	TCONS_00115326	434.3	-0.141422	0.891479	same	same
arl15a	ENSDART00000142157	0	-7.84868	2.87221e-06	XM_017356149.2	8.06665	-2.55732	0.0106711	TCONS_00100316	12.5944	-2.64155	0.000701799	RefSeq longer	V4 longer
arl2bp	ENSDART00000127182	46.4099	-1.13622	0.130292	NM_201001.2	5.77956	-3.05689	0.0893991	TCONS_00043969	93.9285	-0.699897	0.416357	Ens95 longer	V4 longer
arl3	ENSDART00000105545	399.229	-0.0488565	0.97046	NM_001044908.2	396.277	-0.0574028	0.955775	ENSDART00000105545	406.258	0.00285884	0.99912	same	same
arl3l1	ENSDART00000183532	38.6385	-3.00619	0.293414	NM_200693.1	21.2405	-3.17226	0.0204742	TCONS_00062021	39.6658	-2.94086	0.294355	Ens95 longer	same
arl3l2	ENSDART00000021346	15.1113	-3.21806	0.0138534	XM_005169564.4	15.1158	-3.22096	0.0140008	TCONS_00023075	15.4589	-3.1633	0.0241195	same	same
arl4aa	ENSDART00000163513	1575.86	2.15045	3.32241e-06	NM_200860.1	1574.14	2.15041	2.13184e-06	ENSDART00000163513	1603.92	2.19375	9.39507e-07	same	same
arl4ab	ENSDART00000040810	1611.79	2.88138	6.76163e-12	NM_200318.2	1612	2.88385	3.50898e-12	TCONS_00048836	1647.1	2.93202	1.15069e-12	same	same
arl4d	ENSDART00000066269	384.305	-0.429529	0.542855	NM_199644.2	384.715	-0.425093	0.50553	TCONS_00015556	393.601	-0.37503	0.605146	same	same
arl5a	ENSDART00000007392	456.069	0.344098	0.687466	NM_001002339.1	455.766	0.345811	0.646211	TCONS_00125814	464.468	0.393008	0.61589	same	same
arl6	ENSDART00000046094	105.547	-0.638041	0.570805	XM_021474253.1	103.933	-0.649035	0.5244	TCONS_00001354	113.768	-0.53983	0.640515	same	V4 longer
arl6ip1	ENSDART00000058955	6132.1	0.828728	0.0705763	NM_201112.1	6149.66	0.824712	0.0565623	TCONS_00085891	6249.33	0.878535	0.0325009	same	same
arl6ip4	ENSDART00000169013	325.021	-0.231506	0.806548	NM_001020758.1	325.416	-0.229762	0.780607	TCONS_00101523	332.938	-0.17442	0.859077	same	same
arl6ip5a	ENSDART00000112474	131.819	1.01466	0.126609	NM_001006096.1	131.842	1.0512	0.097177	TCONS_00107106	135.242	1.07876	0.0984552	same	same
arl6ip5b	ENSDART00000008761	736.771	0.488851	0.398215	NM_001002517.2	732.256	0.486191	0.358048	TCONS_00069899	751.395	0.541047	0.282231	same	same
arl6ip6	ENSDART00000104732	178.716	1.35121	0.0278706	NM_001089501.1	534.732	1.11157	0.0172348	TCONS_00108426	549.971	1.15374	0.0143899	same	same
arl8	ENSDART00000099121	346.304	-0.589671	0.508067	NM_199824.1	339.956	-0.601951	0.467618	TCONS_00115846	355.563	-0.53432	0.56035	same	same
arl8a	ENSDART00000149320	1243.66	-0.380237	0.587277	NM_001200020.1	1245.21	-0.377094	0.549116	TCONS_00067548	1273.95	-0.319706	0.64771	same	same
arl8ba	ENSDART00000014552	638.216	0.498204	0.48664	NM_205566.1	636.651	0.507065	0.435698	TCONS_00109831	651.421	0.551415	0.395922	same	same
arl8bb	ENSDART00000103076	97.1671	0.596774	0.62837	NM_001326478.1	97.522	0.60219	0.591903	TCONS_00013909	473.806	0.705434	0.221469	same	V4 longer
arl9	ENSDART00000106672	59.3052	0.635547	0.686816	NM_001045387.1	62.8576	0.514442	0.732116	TCONS_00024874	226	0.637695	0.406219	same	V4 longer
armc10	ENSDART00000170605	155.284	-0.476098	0.581544	XM_009297973.3	154.021	-0.454894	0.571501	ENSDART00000170605	159.069	-0.423509	0.638631	Ens95 longer	same
armc1l	ENSDART00000136910	334.226	-0.00558736	0.997466	NM_199539.2	524.591	0.186462	0.814213	TCONS_00071176	536.276	0.234325	0.783931	RefSeq longer	same
armc2	ENSDART00000153140	120.75	0.188862	0.906123	XM_678490.7	14.8303	-1.40039	0.60554	TCONS_00059214	115.783	0.161875	0.929812	Ens95 longer	same
armc3	ENSDART00000111237	10.3044	-0.960785	0.684877	XM_683526.7	10.9529	-1.63128	0.221621	rna59837	10.9638	-0.940533	0.693587	same	same
armc4	ENSDART00000153115	14.8068	-1.66143	0.379804	XM_005156229.4	31.5943	-1.05351	0.235848	TCONS_00017425	32.286	-1.00254	0.300385	Ens95 longer	V4 longer
armc5	ENSDART00000152901	107.7	-0.561662	0.484638	XM_021474093.1	107.708	-0.593533	0.418167	TCONS_00085878	109.793	-0.578943	0.461005	same	same
armc7	ENSDART00000087036	143.389	0.54817	0.62741	NM_001076599.1	143.063	0.526044	0.608425	TCONS_00015474	145.841	0.57993	0.595096	same	same
armc8	ENSDART00000133997	208.996	0.230105	0.82232	NM_001079683.1	146.645	0.532371	0.571732	TCONS_00123630	216.104	0.281645	0.772046	Ens95 longer	same
armc9	ENSDART00000125991	132.239	-0.464058	0.619288	XM_021469647.1	100.535	-0.540502	0.626854	ENSDART00000125991	134.364	-0.417129	0.660829	Ens95 longer	same
armh3	ENSDART00000162211	647.8	0.66797	0.194381	NM_200619.2	172.527	1.13664	0.056924	TCONS_00069451	691.409	0.746428	0.111727	Ens95 longer	V4 longer
arnt	ENSDART00000123253	172.585	0.794614	0.266609	NM_001011712.1	1305.12	1.47122	0.0266408	ENSDART00000123253	1326.71	1.50761	0.0233231	same	same
arnt2	ENSDART00000167323	1127.83	-0.455288	0.496263	XM_009302938.3	50.5808	-0.27117	0.823549	TCONS_00110981	1158.82	-0.408536	0.516575	Ens95 longer	V4 longer
arntl1a	ENSDART00000023959	362.405	0.261963	0.837839	NM_131577.1	361.75	0.259125	0.815761	TCONS_00080268	367.41	0.309313	0.796864	same	same
arntl1b	ENSDART00000104523	220.236	0.166774	0.905884	XM_005166616.4	209.629	0.520453	0.64608	TCONS_00113607	495.421	0.183765	0.869159	same	V4 longer
arntl2	ENSDART00000099849	127.402	0.0564667	0.971823	NM_131578.2	68.7619	0.178678	0.892902	ENSDART00000099849	129.844	0.109238	0.938797	Ens95 longer	same
arpc1a	ENSDART00000014729	3030.93	1.26749	0.0115111	NM_201343.1	3028.12	1.26797	0.00896114	TCONS_00083368	3086.26	1.31782	0.00505611	same	same
arpc1b	ENSDART00000033713	2402.31	1.76685	1.03751e-05	NM_213156.1	2226.29	1.77806	9.8562e-06	TCONS_00083370	2457.85	1.82362	2.02126e-06	Ens95 longer	same
arpc2	ENSDART00000099803	3568.31	0.993736	0.0664728	NM_212699.1	3570.07	0.996366	0.0547218	TCONS_00126934	3649.17	1.04793	0.0419583	same	same
arpc3	ENSDART00000080628	4175	1.40145	0.0233155	NM_001002114.1	4170.62	1.4017	0.0195146	TCONS_00061092	4249.01	1.45134	0.0144106	same	same
arpc4	ENSDART00000146470	1052.94	0.178681	0.879869	NM_205537.1	935.747	0.147482	0.888318	ENSDART00000146470	1081.69	0.241917	0.825397	Ens95 longer	same
arpc4l	ENSDART00000081062	1701.55	0.825769	0.106276	NM_001003762.1	1670.59	0.867331	0.0760882	TCONS_00013147	1736.63	0.882361	0.05892	Ens95 longer	same
arpc5a	ENSDART00000057174	3877.24	1.74867	0.00152763	NM_194378.4	3874.58	1.74929	0.00123597	TCONS_00050333	3951.25	1.79994	0.000732706	same	same
arpc5b	ENSDART00000010329	1026.38	0.00414289	0.999416	NM_201509.1	1027.18	0.00570227	0.996824	TCONS_00056772	1050.52	0.0622448	0.962441	same	same
arpc5la	ENSDART00000061144	327.539	0.477909	0.54253	NM_200578.2	325.597	0.4773	0.499827	TCONS_00119094	344.796	0.520466	0.466372	same	V4 longer
arpc5lb	ENSDART00000135855	467.594	0.358363	0.696139	XM_009301508.3	525.632	0.362089	0.644174	TCONS_00103278	477.973	0.416077	0.623624	RefSeq longer	Ens95/RefSeq longer
arpin	ENSDART00000100778	176.182	0.884213	0.291279	NM_001017780.1	174.89	0.816298	0.313261	TCONS_00042055	226.731	0.751155	0.290438	same	V4 longer
arpp19a	ENSDART00000041597	1686.06	0.250152	0.760173	NM_200630.1	1684.42	0.250694	0.724483	TCONS_00042757	1718.82	0.302491	0.673202	same	same
arpp19b	ENSDART00000058336	648.782	0.0812702	0.93781	NM_200972.1	650.5	0.0852146	0.919025	TCONS_00079764	665.546	0.135048	0.882706	same	Ens95/RefSeq longer
arpp21	ENSDART00000151298	117.328	-0.412846	0.714111	XM_687493.8	115.726	-0.43554	0.659674	rna50302	122.333	-0.339564	0.777357	same	same
arr3a	ENSDART00000078996	200.646	-3.37852	2.50474e-05	NM_001002405.1	200.636	-3.37745	2.53767e-05	TCONS_00006913	205.146	-3.32417	4.05072e-05	same	same
arrb2a	ENSDART00000057291	259.072	-0.540933	0.492748	XM_009305269.3	256.557	-0.545247	0.456834	TCONS_00006752	265.27	-0.479064	0.547141	same	same
arrb2b	ENSDART00000026295	3459.31	1.26841	0.00218301	XM_009303039.3	2458.6	1.14919	0.00456549	TCONS_00111824	3526.59	1.31857	0.000545392	Ens95 longer	same
arrdc1a	ENSDART00000098360	172.587	-0.0686151	0.961119	XM_005171783.4	173.531	-0.0606192	0.958288	TCONS_00103112	176.383	-0.0186023	0.989589	same	same
arrdc2	ENSDART00000011362	1254.37	0.163198	0.872581	NM_199939.1	1253.72	0.164116	0.849279	TCONS_00010752	1278.78	0.215468	0.813999	same	same
arrdc3a	ENSDART00000074592	3646.24	1.33353	0.0237878	NM_001080029.1	3639.04	1.3367	0.0194496	TCONS_00104116	5273.96	1.17455	0.0418026	same	V4 longer
arrdc3b	ENSDART00000052307	2537.1	0.566514	0.31736	NM_001004605.1	2535.37	0.566818	0.275228	TCONS_00009912	2586.24	0.619687	0.208687	same	same
arsa	ENSDART00000140193	11.58	-0.643782	0.83604	NM_001013543.2	8.36609	-0.766643	1	TCONS_00041499	101.844	-0.333221	0.840329	same	V4 longer
arsia	ENSDART00000114053	31.9598	-1.09218	0.39419	XM_002664260.5	29.3949	-0.926653	0.547389	TCONS_00024863	32.6477	-1.04246	0.436076	Ens95 longer	same
arsj	ENSDART00000110623	30.9369	-2.05988	0.0575525	XM_683173.6	30.2843	-2.05036	0.0533258	TCONS_00113359	31.3053	-2.02327	0.0716393	Ens95 longer	same
art4	ENSDART00000109618	5.16511	-0.860471	0.763943	NM_001316762.1	5.16469	-0.860479	1	TCONS_00081362	5.17232	-0.809368	0.793931	same	same
arv1	ENSDART00000113184	130.499	-0.274793	0.790256	NM_001113611.1	124.722	-0.190821	0.844093	TCONS_00055579	133.599	-0.218983	0.837459	Ens95 longer	same
arvcfa	ENSDART00000145220	16.8283	-0.638714	0.823181	XM_695909.8	23.9463	-0.489905	0.837803	TCONS_00005687	42.089	-1.29795	0.370281	RefSeq longer	V4 longer
arxa	ENSDART00000080810	9.37132	-1.09651	0.635712	NM_131384.1	9.0483	-1.07593	1	TCONS_00076715	33.3442	-1.52039	0.257377	same	V4 longer
arxb	ENSDART00000162623	35.5816	0.309334	0.904776	XM_002667050.5	37.51	0.188082	0.93482	TCONS_00064864	35.9487	0.321748	0.903524	same	same
as3mt	ENSDART00000057879	121.288	-0.29097	0.798011	NM_001039839.1	120.636	-0.282808	0.77701	ENSDART00000057879	123.399	-0.246034	0.834793	same	same
asah1a	ENSDART00000017122	136.265	-0.0227204	0.98822	NM_001006088.1	103.399	-0.234225	0.821819	ENSDART00000017122	140.02	0.0312897	0.980822	Ens95 longer	same
asah2	ENSDART00000146650	16.1428	0.395289	0.896611	NM_001007763.1	16.1477	0.433994	1	TCONS_00014670	16.4898	0.462556	0.880357	Ens95 longer	same
asap1a	ENSDART00000169316	1650.9	0.209181	0.753046	XM_005163474.4	1636.22	0.220305	0.696645	ENSDART00000169316	1685.91	0.264377	0.63128	Ens95 longer	same
asap1b	ENSDART00000030409	2039.11	1.19837	0.003458	XM_003201277.5	1358.89	1.21788	0.00769529	ENSDART00000030409	2031.92	1.21796	0.00110907	Ens95 longer	same
asap2a	ENSDART00000026152	178.448	1.74321	0.00573223	XM_005158734.4	1884	2.08772	1.14552e-08	TCONS_00038136	1922.51	2.13824	5.58244e-10	RefSeq longer	same
asap2b	ENSDART00000101556	127.46	0.349144	0.732493	XM_005160726.4	128.09	0.346945	0.696395	TCONS_00056565	130.216	0.392015	0.67715	same	same
asb1	ENSDART00000036369	2.91159	-1.784	0.593327	NM_001002736.1	2.91197	-1.78357	1	TCONS_00124479	19.0822	-0.527277	0.789945	same	V4 longer
asb10	ENSDART00000171189	9.02691	-0.406004	0.920788	NM_001077148.2	9.02232	-0.482772	1	TCONS_00075403	9.0402	-0.444068	0.914152	same	same
asb11	ENSDART00000079068	4.17257	-1.62945	0.580709	NM_214792.1	4.17594	-1.62867	1	TCONS_00126228	4.18053	-1.62882	0.599724	same	same
asb12a	ENSDART00000023306	487.943	0.237044	0.818961	NM_001126376.1	488.293	0.239221	0.789545	ENSDART00000023306	498.348	0.290052	0.763813	same	same
asb12b	ENSDART00000189048	13.5546	-0.778795	0.680256	NM_001004009.2	13.5508	-0.717852	0.68505	TCONS_00025285	13.5737	-0.758383	0.698981	Ens95 longer	same
asb13a.2	ENSDART00000140954	14.1495	-0.00552426	0.999827	NM_001126110.1	15.4398	0.056291	1	TCONS_00088261	20.6129	0.213396	0.936789	same	same
asb13b	ENSDART00000126824	4.81995	-1.31062	0.6751	XM_005166735.4	3.8592	-1.1783	1	TCONS_00120137	55.2058	-0.887708	0.285909	Ens95 longer	V4 longer
asb14a	ENSDART00000167529	7.74034	-1.06048	0.611365	XM_021479915.1	5.49575	-0.769951	1	ENSDART00000167529	7.75193	-1.06011	0.622456	Ens95 longer	same
asb15a	ENSDART00000179684	21.6567	-1.0295	0.606976	XM_021470699.1	17.1306	-0.440577	0.854831	TCONS_00080704	22.0086	-0.976542	0.645904	Ens95 longer	same
asb16	ENSDART00000137944	18.3885	0.65919	0.769093	NM_001040368.1	20.9569	0.69595	0.708063	TCONS_00082089	21.3069	0.718548	0.73362	same	same
asb2a.1	ENSDART00000026088	12.6047	-1.44272	0.499994	XM_005160609.4	3.86914	-2.19997	1	TCONS_00058959	17.1602	-1.03924	0.680364	Ens95 longer	same
asb2a.1	ENSDART00000152917				XM_003200708.5	9.71613	-0.411171	1	TCONS_00058965	17.1602	-1.03924	0.680364	RefSeq longer	same
asb3	ENSDART00000021298	212.153	0.43577	0.544148	NM_199874.1	211.839	0.436631	0.499045	TCONS_00015378	218.261	0.407879	0.544872	same	V4 longer
asb4	ENSDART00000048438	43.6557	-0.505359	0.857601	NM_001017628.1	55.2775	-0.568369	0.737523	TCONS_00046626	56.9441	-0.544547	0.784439	same	same
asb5a	ENSDART00000138376	14.4639	-0.580373	0.844618	NM_001017746.2	14.7905	-0.548217	0.83577	TCONS_00026433	15.1321	-0.495576	0.877626	Ens95 longer	same
asb5b	ENSDART00000075230	77.7275	-1.74948	0.00542531	XM_005159984.4	77.4207	-1.7535	0.00512715	TCONS_00004511	79.1285	-1.70076	0.00754386	same	same
asb6	ENSDART00000014915	47.098	0.545428	0.671419	NM_001020576.2	47.097	0.502694	0.667788	TCONS_00119987	249.594	0.27819	0.797263	same	V4 longer
asb7	ENSDART00000006343	742.72	0.0444688	0.968113	NM_214730.1	25.1644	-0.498821	0.747376	TCONS_00114362	759.266	0.100171	0.912203	Ens95 longer	same
asb8	ENSDART00000188394	328.691	0.113734	0.90595	XM_005162226.4	313.455	0.171764	0.825675	ENSDART00000188394	339.158	0.180147	0.828043	Ens95 longer	same
ascc1	ENSDART00000114415	385.35	1.4616	0.0363644	NM_001017610.1	391.211	1.46694	0.0286643	TCONS_00018439	426.925	1.51061	0.0244545	same	V4 longer
ascc2	ENSDART00000048859	148.418	0.321333	0.759715	XM_005165069.4	462.983	0.513702	0.519541	TCONS_00099054	397.672	0.608879	0.46234	RefSeq longer	same
ascl1a	ENSDART00000056005	234.681	-1.94303	0.0120123	NM_131219.1	230.941	-1.95257	0.0109656	TCONS_00088606	242.168	-1.8782	0.0185823	Ens95 longer	same
ascl1b	ENSDART00000019446	64.3942	-2.30441	0.00360592	NM_131231.1	45.098	-2.6722	0.000406095	TCONS_00113054	65.7854	-2.24523	0.00574487	same	same
asf1ba	ENSDART00000167179	444.912	-0.258255	0.773705	NM_207063.1	441.43	-0.257054	0.743117	TCONS_00087007	451.713	-0.214493	0.816494	same	same
asf1bb	ENSDART00000064194	458.911	-0.0845446	0.92775	NM_214757.2	456.349	-0.0849	0.911439	TCONS_00005329	467.965	-0.0333498	0.972217	same	same
ash1l	ENSDART00000052915	1950.55	0.0967419	0.901702	NM_001346407.1	1938.93	0.0938481	0.882932	TCONS_00045495	1989.82	0.142916	0.828679	Ens95 longer	same
asic1a	ENSDART00000004588	16.8135	-1.70026	0.232349	XM_021478320.1	4.53133	-2.61632	0.20213	TCONS_00117261	25.8971	-1.44572	0.288794	Ens95 longer	V4 longer
asic1b	ENSDART00000165549	18.6863	-0.966472	0.485525	XM_005161666.4	78.4825	-1.93645	0.0407984	TCONS_00067964	80.8514	-1.88162	0.0555313	RefSeq longer	same
asic2	ENSDART00000137038	25.6808	-2.29617	0.167626	XM_005164122.4	47.3023	-1.71465	0.0688163	rna7283	48.6458	-1.64586	0.100209	same	same
asic4a	ENSDART00000032695	25.3593	-2.50472	0.0737689	NM_214787.2	3.85638	-2.03627	1	ENSDART00000032695	20.8946	-1.98556	0.285909	Ens95 longer	same
asic4b	ENSDART00000104716	15.1435	-1.07813	0.59185	NM_214786.1	14.8293	-1.04902	0.632451	TCONS_00105909	28.0989	-0.547644	0.825887	same	V4 longer
asip1	ENSDART00000113083	8.72135	-2.93838	0.00602887	XM_005172113.4	20.9354	-3.89269	6.64517e-10	TCONS_00110102	23.8614	-3.88067	4.98704e-09	RefSeq longer	V4 longer
asip2b	ENSDART00000185699	96.3958	-3.97179	1.15959e-14	NM_001271291.1	11.6291	-2.64915	0.0158705	TCONS_00052588	98.4736	-3.91969	1.07994e-14	Ens95 longer	same
asl	ENSDART00000178521	144.179	0.589221	0.452311	NM_200451.1	140.32	0.730958	0.286912	TCONS_00061993	146.645	0.722359	0.281369	Ens95 longer	same
asmt2	ENSDART00000086885	39.6171	-0.584577	0.661678	NM_001110477.1	54.5134	-0.244451	0.84921	TCONS_00037770	128.861	-0.152658	0.885431	same	V4 longer
asna1	ENSDART00000007079	739.689	0.202105	0.794996	NM_001002298.2	178.155	0.685888	0.351581	ENSDART00000007079	754.933	0.251419	0.704933	Ens95 longer	same
asns	ENSDART00000121476	141.662	0.402886	0.70485	NM_201163.3	380.191	0.0841936	0.908732	TCONS_00048550	389.413	0.101285	0.902059	RefSeq longer	V4 longer
asnsd1	ENSDART00000166785	271.077	0.0594002	0.959584	XM_017357660.2	232.617	0.0905	0.931495	TCONS_00126734	277.288	0.113592	0.911481	Ens95 longer	same
aspa	ENSDART00000148381	31.5833	-0.03055	0.989476	NM_001110103.1	31.2663	-0.0160013	0.993405	TCONS_00101280	330.127	0.576988	0.445081	same	V4 longer
aspdh	ENSDART00000055855	2.25422	-1.19125	1	NM_001004657.1	3.86494	-0.807384	1	TCONS_00085127	2.25791	-1.09909	1	same	same
aspg	ENSDART00000109525	234.028	-0.0254287	0.983783	XM_005158951.4	235.029	-0.00363419	0.997506	TCONS_00038445	240.175	0.0375428	0.972823	Ens95 longer	same
asph	ENSDART00000099208	456.446	-0.59623	0.548087	NM_001256603.1	481.429	-0.613249	0.484659	ENSDART00000099208	470.091	-0.532223	0.604744	same	same
asphd1	ENSDART00000141752	41.5395	-1.31396	0.141742	XM_021474892.1	42.1947	-1.29167	0.139749	TCONS_00081802	42.8936	-1.23796	0.182336	same	same
asphd2	ENSDART00000083066	279.777	-0.105203	0.934748	XM_005167384.4	295.621	-0.0212074	0.985729	TCONS_00121658	301.54	0.0270518	0.984229	same	same
aspm	ENSDART00000157940	1630.89	-0.206321	0.822069	XM_005161737.2	1650.87	-0.187871	0.814441	TCONS_00066841	1686.32	-0.144318	0.879896	same	same
aspn	ENSDART00000064798	80.7516	-4.73955	6.14866e-11	NM_131713.2	81.1095	-4.73206	7.63685e-11	TCONS_00068230	83.4611	-4.6794	3.06582e-10	same	same
asrgl1	ENSDART00000029521	55.5404	0.168871	0.922751	NM_001013529.1	54.8841	0.151695	0.9161	TCONS_00019793	56.5822	0.2128	0.896999	same	same
ASTE1	ENSDART00000090548	63.2545	-0.385782	0.753377	XM_001343150.8	52.9267	-0.537739	0.614953	TCONS_00045875	64.3115	-0.341227	0.784855	Ens95 longer	same
aste1a	ENSDART00000102665	24.4602	-0.526629	0.810703	NM_001099430.2	24.4753	-0.525634	0.787655	TCONS_00033359	25.1439	-0.474832	0.83784	same	same
astn1	ENSDART00000077216	124.268	-2.36545	0.000288747	XM_003197882.5	105.886	-2.52664	0.00123404	TCONS_00051121	148.095	-2.13416	0.000157404	Ens95 longer	same
asxl1	ENSDART00000134141	846.451	0.0154102	0.990649	XM_001341206.5	1022	0.132327	0.864153	TCONS_00071131	1045.04	0.187786	0.819737	RefSeq longer	same
asxl2	ENSDART00000108514	43.3067	-0.599762	0.71548	XM_005158855.4	34.2283	-0.820922	0.520655	TCONS_00040514	514.26	-0.225723	0.715049	RefSeq longer	V4 longer
asz1	ENSDART00000005145	3.84989	-1.67213	0.601429	NM_200230.1	3.85351	-1.67128	1	TCONS_00044059	3.8574	-1.59342	0.644961	same	same
atad1b	ENSDART00000079130	19.6177	-0.732806	0.691507	NM_001024421.2	19.6256	-0.717577	0.66995	TCONS_00015005	265.529	-0.383985	0.597787	same	V4 longer
atad5a	ENSDART00000103733	555.085	-0.379215	0.688167	XM_003198109.4	555.838	-0.371186	0.661526	TCONS_00082449	568.854	-0.326729	0.739735	same	same
atat1	ENSDART00000049368	66.836	-1.14237	0.767419	NM_001328263.1	67.1886	-1.14129	0.556879	TCONS_00046202	224.012	-0.503048	0.611	same	same
atcaya	ENSDART00000138967	87.5478	-2.08096	0.00212564	XM_009295950.3	79.4741	-2.21319	0.00815212	TCONS_00065822	89.622	-2.02025	0.00350158	same	same
atcayb	ENSDART00000157905	149.302	-1.52027	0.0273632	XM_009298934.3	17.1494	-0.2711	0.92072	TCONS_00052101	150.168	-1.46582	0.0355866	Ens95 longer	same
atf1	ENSDART00000185446	952.507	0.184818	0.828355	NM_199723.1	920.139	0.274268	0.692515	ENSDART00000185446	975.253	0.240879	0.756219	Ens95 longer	same
atf3	ENSDART00000022060	21162.7	1.78392	0.0884574	NM_200964.1	21148.2	1.78541	0.0778579	TCONS_00056989	21518.5	1.81974	0.0801953	same	same
atf4a	ENSDART00000191678	7479.28	0.920482	0.221444	NM_213233.1	7533.71	0.915556	0.200871	ENSDART00000191678	7713.65	0.962587	0.191286	same	same
atf4b	ENSDART00000055609	22254.5	1.07515	0.0644912	NM_001103192.1	22242	1.07637	0.0526868	TCONS_00082313	22691.6	1.11962	0.044929	same	same
atf5a	ENSDART00000098285	24.8739	-1.64339	0.278897	NM_001128731.1	24.8719	-1.63774	0.266898	TCONS_00103158	279.998	-1.64358	0.00882041	same	V4 longer
atf5b	ENSDART00000112838	644.373	0.562987	0.40276	XM_021466358.1	624.043	0.630985	0.280967	ENSDART00000112838	655.929	0.61336	0.306246	Ens95 longer	same
atf7a	ENSDART00000013563	161.831	1.68409	0.0491545	NM_001030205.1	161.481	1.67198	0.0464643	ENSDART00000013563	163.661	1.71711	0.0463104	same	same
atf7b	ENSDART00000136076	269.634	0.0330923	0.97932	XM_005166049.3	284.225	0.10189	0.913165	TCONS_00109589	290.103	0.156285	0.876159	same	same
atg10	ENSDART00000193434	196.559	0.334462	0.725421	NM_001037124.1	128.038	0.370864	0.689846	TCONS_00007722	199.739	0.385792	0.660701	Ens95 longer	same
atg101	ENSDART00000063544	459.449	0.363713	0.671419	NM_001037239.1	458.505	0.369855	0.622639	TCONS_00009328	467.52	0.412859	0.592194	same	same
atg13	ENSDART00000052324	619.002	-0.165206	0.855237	XM_005168970.4	619.377	-0.162399	0.834578	TCONS_00115693	632.838	-0.107702	0.907259	same	same
ATG14	ENSDART00000018683	66.0205	-0.510133	0.672602	NM_001024812.2	51.5241	-0.61358	0.603702	TCONS_00037019	68.0566	-0.447855	0.727494	Ens95 longer	same
atg3	ENSDART00000041304	358.453	0.229073	0.787284	NM_200022.1	358.805	0.245793	0.735523	TCONS_00107958	372.22	0.287373	0.708907	same	same
atg4a	ENSDART00000165361	411.19	0.832671	0.188268	NM_001024434.1	31.2732	0.621304	0.672929	TCONS_00062392	417.569	0.875406	0.136981	Ens95 longer	same
atg4b	ENSDART00000154161	208.002	0.215241	0.794996	NM_001089352.1	280.539	0.205007	0.758919	TCONS_00106297	286.407	0.250201	0.717011	Ens95 longer	V4 longer
atg4c	ENSDART00000127879	231.127	0.0531382	0.969041	XM_009302452.3	232.745	0.0886073	0.9315	TCONS_00109241	237.246	0.110015	0.925699	Ens95 longer	same
atg4da	ENSDART00000152289	491.543	1.10648	0.047858	XM_009294436.3	545.751	1.16843	0.0252957	TCONS_00002173	565.641	1.21241	0.0177828	RefSeq longer	V4 longer
atg5	ENSDART00000029727	635.076	0.854059	0.164244	NM_001009914.2	643.782	0.867228	0.136312	TCONS_00031790	645.969	0.899207	0.11728	same	same
atg7	ENSDART00000173331	115.705	0.366805	0.725888	XM_021479676.1	116.028	0.360668	0.700136	TCONS_00012340	118.459	0.398857	0.695231	same	same
atg9b	ENSDART00000182322	864.513	0.290177	0.673779	NM_001320078.1	859.648	0.296675	0.615696	TCONS_00075398	880.267	0.337578	0.567035	same	same
atic	ENSDART00000022307	149.645	-1.11562	0.202926	NM_001082796.2	53.972	-1.23642	0.44316	TCONS_00000228	279.138	-0.920994	0.159796	Ens95 longer	V4 longer
atl1	ENSDART00000111832	869.486	1.9179	0.00109841	NM_001145700.1	868.142	1.90342	0.00103889	TCONS_00020334	882.939	1.95621	0.000571085	same	same
atl2	ENSDART00000080460	415.318	-0.156036	0.870089	NM_001110022.2	414.727	-0.145756	0.857898	TCONS_00021066	424.978	-0.102505	0.919254	same	same
atl3	ENSDART00000023054	1658.13	0.814304	0.104269	XM_005157232.2	1401.5	0.758391	0.123266	TCONS_00024071	1707.35	0.85424	0.0705916	Ens95 longer	V4 longer
atm	ENSDART00000152725	280.782	0.131708	0.887355	XM_002664557.3	280.485	0.128537	0.867025	TCONS_00029380	286.682	0.179951	0.831828	same	same
atn1	ENSDART00000133886	201.303	-1.60572	0.000490645	XM_005158189.4	182.301	-1.66581	0.000766459	TCONS_00032922	206.447	-1.57054	0.000626725	Ens95 longer	same
atoh1b	ENSDART00000159069	15.7876	-1.54852	0.148948	NM_001128679.1	15.7878	-1.54837	0.140067	TCONS_00129971	40.4103	-1.80957	0.00960565	same	V4 longer
atoh8	ENSDART00000054689	568.481	0.108371	0.905515	NM_001079991.2	567.504	0.107789	0.887786	TCONS_00025298	579.311	0.156763	0.8468	same	same
atox1	ENSDART00000123053	457.248	0.696635	0.382649	NM_001256633.3	451.768	0.692518	0.351026	TCONS_00025825	465.312	0.7461	0.315127	same	same
atp10a	ENSDART00000086533	368.176	1.15252	0.0642493	XM_021477201.1	1203.68	1.21274	0.00963848	TCONS_00106833	1226.42	1.25756	0.006826	RefSeq longer	Ens95/RefSeq longer
atp10b	ENSDART00000157967	38.027	-1.75168	0.0363685	XM_017359117.2	19.3503	-1.49409	0.147832	ENSDART00000157967	33.5611	-1.73607	0.036226	Ens95 longer	same
atp10d	ENSDART00000086525	327.517	-0.0901187	0.919185	XM_005156574.4	322.049	-0.105049	0.883264	TCONS_00019076	334.451	-0.034908	0.969597	Ens95 longer	same
atp11a	ENSDART00000150029	1000.96	0.128695	0.910335	XM_021477091.1	364.658	1.05324	0.0787844	TCONS_00004836	1217.11	0.288332	0.747143	Ens95 longer	same
ATP11B	ENSDART00000157966	824.856	0.256724	0.713637	XM_017353413.2	737.59	0.266245	0.682448	TCONS_00069526	845.114	0.300771	0.630225	Ens95 longer	same
atp11c	ENSDART00000167282	179.325	1.1513	0.0710582	XM_009291177.3	2387.04	1.95565	2.01879e-07	TCONS_00026151	2446.69	2.00209	2.70578e-08	RefSeq longer	same
atp13a1	ENSDART00000058958	471.567	0.287062	0.680076	NM_001001403.2	471.61	0.288556	0.635143	TCONS_00083693	481.623	0.336356	0.590668	same	same
atp13a2	ENSDART00000088777	195.208	0.62519	0.410386	NM_001080037.1	195.201	0.621688	0.376121	TCONS_00073032	199.034	0.64413	0.373495	same	same
atp13a3	ENSDART00000173216	747.233	0.96247	0.0763465	XM_009306171.3	116.092	0.749094	0.394873	TCONS_00013837	1152.42	0.906316	0.0478757	Ens95 longer	V4 longer
atp1a1a.1	ENSDART00000081047	7049.92	0.570501	0.232419	NM_131686.1	7020.5	0.573586	0.192072	ENSDART00000081047	7201.05	0.621195	0.14904	same	same
atp1a1a.2	ENSDART00000006449	88.4743	-3.87976	0.000143365	NM_131687.1	88.495	-3.87675	0.000144466	rna105	91.5228	-3.8101	0.000215181	same	same
atp1a1a.3	ENSDART00000103850	43.2558	-2.09091	0.0244113	NM_131688.1	43.258	-2.08837	0.0234238	TCONS_00000129	43.9623	-2.03968	0.033629	same	same
atp1a1a.4	ENSDART00000048828	358.406	-1.04336	0.208113	NM_131689.1	352.011	-1.04814	0.1937	TCONS_00000114	366.701	-0.991631	0.240338	same	same
atp1a1a.5	ENSDART00000006013	10.9514	-1.21877	0.400269	NM_178099.2	10.9542	-1.21834	0.373835	TCONS_00000130	10.9689	-1.18151	0.437629	same	same
atp1a1b	ENSDART00000005086	695.257	-3.29195	3.13632e-07	NM_131690.1	668.74	-3.31999	4.83539e-07	TCONS_00124061	719.291	-3.2227	4.20892e-07	same	V4 longer
atp1a2a	ENSDART00000011188	4.17459	-3.18839	0.0400185	NM_131683.1	4.17736	-3.1875	0.0409234	TCONS_00054596	4.50365	-3.05642	0.0746327	same	same
atp1a3a	ENSDART00000104950	857.943	-1.4265	0.0708164	NM_131684.2	850.293	-1.42775	0.0636281	TCONS_00047482	926.118	-1.34406	0.0828712	same	same
atp1a3b	ENSDART00000161969	309.503	-1.57909	0.0392504	NM_131685.2	305.074	-1.59282	0.039356	TCONS_00031911	318.711	-1.51388	0.0518404	same	same
atp1b1a	ENSDART00000006386	8812.16	1.10071	0.025253	NM_131668.3	8818.14	1.10394	0.0202847	TCONS_00106438	9022.72	1.15387	0.0156891	same	same
atp1b1b	ENSDART00000139387	328.822	-2.44167	0.00109407	NM_131671.1	327.885	-2.44608	0.000914893	TCONS_00000468	895.288	-2.68325	0.000375498	same	V4 longer
atp1b2a	ENSDART00000165654	591.557	-1.51895	0.00473948	XM_021469844.1	2026.45	-1.55798	0.0507813	TCONS_00071853	2084.25	-1.49172	0.0715181	RefSeq longer	same
atp1b2b	ENSDART00000097822	93.6615	-3.26708	0.000711596	NM_131838.2	93.6709	-3.26696	0.000701056	TCONS_00103665	99.9437	-3.16261	0.00141661	Ens95 longer	V4 longer
atp1b3a	ENSDART00000022549	471.462	-1.15092	0.274444	NM_131221.2	461.672	-1.19985	0.268292	TCONS_00052999	488.704	-1.10698	0.300385	same	same
atp1b3b	ENSDART00000062874	233.176	-1.8071	0.014448	NM_131670.1	233.928	-1.7958	0.0141314	ENSDART00000062874	240.332	-1.73463	0.0211204	same	same
atp1b4	ENSDART00000075278	322.1	-2.76057	6.29907e-08	XM_002664424.6	322.207	-2.75901	5.72826e-08	TCONS_00024184	330.012	-2.69786	7.81126e-08	same	same
atp23	ENSDART00000093289	171.482	-0.0334729	0.980113	NM_001083580.1	169.886	-0.030802	0.977097	ENSDART00000093289	174.96	-0.00129237	0.999907	Ens95 longer	same
atp2a1l	ENSDART00000186984	63.6778	-1.62882	0.21609	XM_005156072.4	59.1792	-1.62141	0.211755	TCONS_00014842	65.7167	-1.5573	0.258193	Ens95 longer	same
atp2a2a	ENSDART00000042040	124.759	0.152231	0.895144	NM_200965.1	193.995	0.115556	0.899513	TCONS_00117496	211.3	0.13854	0.896449	same	same
atp2a2b	ENSDART00000161650	780.087	-0.499444	0.426972	XM_005161196.4	788.639	-0.497076	0.388983	TCONS_00061094	799.026	-0.442122	0.483803	Ens95 longer	same
atp2a3	ENSDART00000086443	869.844	0.513156	0.492875	XM_009301580.3	875.449	0.519328	0.440165	TCONS_00099813	893.709	0.569055	0.399736	Ens95 longer	same
atp2b1a	ENSDART00000077664	1351.94	0.043518	0.96183	XM_009300256.3	1355.31	0.0382304	0.958595	TCONS_00093885	1384.61	0.0912978	0.90301	same	same
atp2b1b	ENSDART00000104353	185.355	-2.36161	0.0123005	XM_009297908.3	188.619	-2.33681	0.0129443	TCONS_00080371	194.043	-2.30009	0.0177043	same	V4 longer
atp2b2	ENSDART00000158390				NM_001123238.1	149.443	-2.35465	0.000748248	TCONS_00012360	6023.91	0.287139	0.728702	same	V4 longer
atp2b3b	ENSDART00000153828	300.692	-2.40514	0.000188411	XM_009296741.3	301.089	-2.40234	0.000180399	ENSDART00000153828	308.582	-2.33786	0.000282962	Ens95 longer	same
atp2c1	ENSDART00000084528	119.856	-0.157868	0.896304	XM_003200239.5	536.349	-0.0935216	0.892038	TCONS_00035932	547.756	-0.0463394	0.956948	RefSeq longer	same
atp5f1b	ENSDART00000060310	11702.3	0.266496	0.676844	NM_001024429.2	11720.8	0.269125	0.62593	TCONS_00010736	11952.9	0.319346	0.55814	same	same
atp5f1c	ENSDART00000066930	4129.2	0.170631	0.861905	NM_001328551.1	4187.62	0.153131	0.854807	TCONS_00094433	4270.02	0.203538	0.819993	RefSeq longer	same
atp5f1d	ENSDART00000019235	3075.95	0.561604	0.460298	NM_199968.1	3058.74	0.579268	0.399161	TCONS_00068713	3029.6	0.602178	0.398023	same	same
atp5fa1	ENSDART00000024199	12037	0.425451	0.465628	NM_001077355.1	12041.8	0.427976	0.414981	TCONS_00060561	12313.9	0.479031	0.362531	same	same
atp5if1a	ENSDART00000151243	1151.15	1.00577	0.143229	NM_001089521.1	1150.2	1.01047	0.123166	TCONS_00047072	1172.8	1.05164	0.110854	Ens95 longer	same
atp5if1b	ENSDART00000064738	705.993	0.240452	0.834736	NM_001044859.1	705.362	0.24934	0.803526	TCONS_00037589	718.928	0.291637	0.784807	same	same
atp5l	ENSDART00000012888	5034.78	0.92537	0.2562	NM_199757.1	4912.24	0.922199	0.22833	TCONS_00099784	5112.06	0.969527	0.207938	same	same
atp5mc1	ENSDART00000078423	4593.51	-0.00567276	0.997723	NM_213028.1	4583.01	-0.00445165	0.997506	TCONS_00085411	4692.93	0.0477959	0.971767	same	same
atp5mc3a	ENSDART00000016417	2481.9	0.168632	0.856876	NM_201176.1	2481.08	0.174787	0.825801	TCONS_00122542	2536.3	0.222138	0.795512	same	same
atp5md	ENSDART00000150789	1382.26	0.913044	0.283069	NM_001200033.1	1376.92	0.913268	0.252126	TCONS_00004964	1402.54	0.956603	0.235931	same	same
atp5mea	ENSDART00000115236	1129.02	0.840382	0.287321	NM_001172637.1	1115.01	0.844866	0.253441	TCONS_00063608	1146.06	0.8814	0.237125	Ens95 longer	same
atp5meb	ENSDART00000099891	2306.5	0.588036	0.523715	NM_001098481.1	2300.49	0.586769	0.484245	TCONS_00102028	2344.26	0.634099	0.459699	same	same
atp5mf	ENSDART00000055186	1483.16	0.754987	0.349409	NM_001303129.1	1479.87	0.755038	0.313594	TCONS_00086688	1186.4	0.80138	0.270551	same	same
atp5pb	ENSDART00000009682	5411.02	0.497994	0.465628	NM_001005960.1	5349.59	0.53167	0.384421	ENSDART00000009682	5514.39	0.547192	0.375499	Ens95 longer	same
atp5pd	ENSDART00000160370	4284.61	0.406713	0.643582	XM_005163774.4	4269.91	0.410805	0.599551	ENSDART00000160370	4369.22	0.455913	0.569895	Ens95 longer	same
atp5pf	ENSDART00000004062	3325.01	0.766115	0.29674	NM_213307.1	3317.47	0.773214	0.25845	TCONS_00002929	3382.62	0.812783	0.233942	same	V4 longer
atp5po	ENSDART00000005879	6077.67	0.349967	0.698249	NM_001003843.1	6057.67	0.35407	0.654164	ENSDART00000005879	6196.47	0.398918	0.628931	same	same
atp6ap1a	ENSDART00000060714	397.805	-1.48021	0.0611976	XM_001338976.8	399.298	-1.47794	0.0549085	TCONS_00072140	410.071	-1.40816	0.0790452	same	same
atp6ap1b	ENSDART00000129617	574.787	0.420448	0.560763	NM_173265.2	575.167	0.422552	0.51601	TCONS_00070952	588.237	0.475792	0.471281	same	same
atp6ap1la	ENSDART00000130573	31.5213	-1.09356	0.448191	XM_001340588.8	31.8583	-1.07847	0.426597	TCONS_00014206	170.112	-1.4997	0.0817836	same	V4 longer
atp6ap1lb	ENSDART00000137811	114.45	-2.02791	0.0430955	NM_001201403.1	115.166	-2.01716	0.0411996	TCONS_00070504	119.472	-1.94418	0.0618653	same	V4 longer
atp6ap2	ENSDART00000125561	1602.23	-0.617327	0.484673	NM_213023.2	1606.34	-0.610857	0.452481	TCONS_00068280	1648.36	-0.551564	0.541118	same	same
atp6v0a1a	ENSDART00000017646	407.25	-0.820496	0.234456	XM_005163798.3	409.265	-0.836573	0.203271	TCONS_00081892	418.509	-0.782661	0.260487	same	same
atp6v0a2a	ENSDART00000140476	79.4668	-2.02127	0.00605274	XM_009305132.3	68.2235	-1.86808	0.0203988	TCONS_00008366	84.1142	-1.91946	0.0111162	Ens95 longer	same
atp6v0a2b	ENSDART00000029699	231.139	-0.243834	0.823815	NM_001122747.2	135.525	-0.308638	0.769493	TCONS_00099421	274.75	-0.164804	0.880473	Ens95 longer	V4 longer
atp6v0b	ENSDART00000147439	822.808	-0.858452	0.219151	NM_199561.2	823.948	-0.854664	0.198211	TCONS_00053980	1838.29	-0.483185	0.478894	same	V4 longer
atp6v0ca	ENSDART00000023859	4798.44	0.287695	0.664048	NM_001105136.2	4805.38	0.287962	0.618508	TCONS_00085061	4908.9	0.342719	0.554868	same	same
atp6v0cb	ENSDART00000053139	2006.55	-1.26902	0.0440979	NM_205554.1	2010.79	-1.26461	0.0396372	TCONS_00075663	2062.65	-1.20205	0.0560566	same	same
atp6v0d1	ENSDART00000100254	585.278	-0.674074	0.336424	NM_199620.1	586.019	-0.670417	0.306619	TCONS_00112402	599.723	-0.611525	0.380842	same	same
atp6v1aa	ENSDART00000049003	645.686	-0.588623	0.518	NM_201135.2	647.481	-0.583806	0.485965	TCONS_00099407	663.155	-0.523003	0.573901	same	same
atp6v1ab	ENSDART00000154259	169.61	-0.793747	0.400885	XM_021470316.1	168.695	-0.801713	0.369611	TCONS_00076578	174.719	-0.724686	0.456613	same	same
atp6v1b2	ENSDART00000063806	125.798	-2.23067	0.00222487	NM_182879.2	125.855	-2.22871	0.00221344	TCONS_00006521	129.548	-2.15893	0.00387123	same	same
atp6v1ba	ENSDART00000007021	963.033	-0.0911315	0.949663	NM_182878.1	961.539	-0.0911854	0.940363	TCONS_00039780	992.341	-0.0223026	0.988549	same	same
atp6v1c1a	ENSDART00000032275	330.806	-0.504499	0.613289	NM_201322.1	331.553	-0.498403	0.58336	TCONS_00033730	340.366	-0.435424	0.674119	same	same
atp6v1c1b	ENSDART00000052091	216.518	-0.295157	0.779536	NM_001005772.2	216.564	-0.294891	0.749911	TCONS_00046394	221.685	-0.237048	0.82875	same	same
atp6v1c2	ENSDART00000103374	8.08061	0.642447	0.898037	XM_021467504.1	6.47455	1.15355	1	TCONS_00041006	8.09127	0.643387	0.903981	same	same
atp6v1d	ENSDART00000023488	461.388	-0.156476	0.870696	NM_001167954.1	462.404	-0.152449	0.852836	ENSDART00000023488	472.406	-0.0972349	0.923818	same	same
atp6v1e1a	ENSDART00000008986	404.908	0.16341	0.849546	XM_017354179.1	424.57	0.155291	0.82784	TCONS_00078386	293.878	0.0835545	0.92607	RefSeq longer	Ens95/RefSeq longer
atp6v1e1b	ENSDART00000050221	1308.2	-0.211848	0.848608	NM_173254.1	1308.62	-0.20842	0.82694	ENSDART00000050221	1337.27	-0.153215	0.892887	same	same
atp6v1g1	ENSDART00000036331	911.242	-0.596348	0.520652	NM_199934.1	898.688	-0.600862	0.476712	TCONS_00101044	937.217	-0.528342	0.579158	same	same
atp6v1h	ENSDART00000189233	956.284	-0.167973	0.863016	NM_001291708.1	953.944	-0.161229	0.846572	TCONS_00050903	979.687	-0.106464	0.917396	Ens95 longer	same
atp7a	ENSDART00000124072	487.081	0.69143	0.191054	XM_005173125.4	76.4962	0.379358	0.741752	ENSDART00000124072	496.49	0.742136	0.117317	Ens95 longer	same
atp8a2	ENSDART00000109848	327.999	-0.737845	0.158784	XM_003201304.5	57.3505	-0.780274	0.335661	TCONS_00076588	354.945	-0.68506	0.180417	Ens95 longer	V4 longer
atp8b1	ENSDART00000137844	37.4413	-0.330825	0.83889	XM_001920475.7	37.1218	-0.37265	0.786209	TCONS_00062846	159.973	-0.407389	0.724085	RefSeq longer	V4 longer
atp8b4	ENSDART00000152787	29.4462	1.22267	0.694888	XM_682623.7	30.0914	0.758022	0.795526	TCONS_00080875	32.3882	0.435305	0.882277	RefSeq longer	V4 longer
atp9b	ENSDART00000136294	56.7941	0.649739	0.621438	XM_005170057.4	89.084	0.123973	0.918814	TCONS_00046020	322.249	0.612159	0.390827	RefSeq longer	V4 longer
atpv0e2	ENSDART00000082066	297.223	-1.70695	0.0124476	NM_001172635.1	297.991	-1.70384	0.011731	TCONS_00067248	306.091	-1.63883	0.0183627	same	same
atraid	ENSDART00000063696	128.728	-0.52723	0.706531	NM_001044773.1	137.118	-0.559083	0.65151	TCONS_00056034	133.45	-0.452225	0.758453	same	same
atrip	ENSDART00000091850	108.779	-0.318031	0.81671	XM_005173968.4	110.094	-0.297043	0.808913	TCONS_00066229	112.825	-0.249803	0.865605	same	same
atrnl1b	ENSDART00000042514	807.573	-0.493427	0.339598	XM_692563.9	804.129	-0.49221	0.301953	TCONS_00017658	827.174	-0.436857	0.377732	Ens95 longer	same
atrx	ENSDART00000125865	7143.77	0.343449	0.534389	XM_021480976.1	7010.41	0.335207	0.499392	TCONS_00023410	7290.41	0.393928	0.402596	Ens95 longer	same
atxn10	ENSDART00000066980	38.8276	-0.817343	0.754668	NM_001130612.1	44.0178	-1.01769	0.624721	TCONS_00094120	134.178	-0.603654	0.448312	same	V4 longer
atxn1b	ENSDART00000149411	218.594	-1.5219	0.00946182	XM_005158159.4	151.264	-1.01666	0.0492033	ENSDART00000149411	283.574	-1.25016	0.0169725	Ens95 longer	same
atxn2	ENSDART00000083656	286.434	0.198762	0.823667	XM_009301663.3	371.297	0.256391	0.703464	TCONS_00103808	395.084	0.32169	0.637407	RefSeq longer	V4 longer
atxn2l	ENSDART00000133168	918.602	0.164143	0.844975	XM_005163799.4	932.568	0.171354	0.81127	TCONS_00081819	953.56	0.222363	0.769534	same	same
atxn7	ENSDART00000110499	557.493	0.0242244	0.981689	XM_001341439.8	526.701	0.0479847	0.95338	TCONS_00013272	568.953	0.0757138	0.929628	same	same
atxn7l1	ENSDART00000155320	59.0538	0.74602	0.549221	XM_003198215.5	90.0026	0.559608	0.544744	rna8500	86.882	0.537942	0.602934	RefSeq longer	same
atxn7l2a	ENSDART00000135360	392.183	0.662473	0.35919	XM_005172905.4	397.393	0.672424	0.319835	TCONS_00011733	400.17	0.707085	0.305388	same	same
atxn7l2b	ENSDART00000143922	403.307	0.416269	0.544828	NM_001002655.2	403.311	0.41939	0.495871	TCONS_00118226	410.332	0.465762	0.440985	same	same
atxn7l3	ENSDART00000104118	81.753	-0.108819	0.946526	XM_005163869.4	264.95	0.217255	0.75582	TCONS_00085232	228.467	0.248325	0.76472	RefSeq longer	same
auh	ENSDART00000063093	248.417	-0.253927	0.772408	NM_001003576.2	256.177	-0.258952	0.739377	TCONS_00005936	262.026	-0.208615	0.818796	RefSeq longer	same
aurka	ENSDART00000008224	617.903	0.695164	0.258162	NM_001003640.2	617.287	0.69518	0.223235	TCONS_00107700	629.102	0.737768	0.197838	same	same
aurkaip1	ENSDART00000167059	441.364	0.0689469	0.956956	NM_001105695.1	438.806	0.102059	0.9162	TCONS_00071101	450.077	0.119315	0.91668	Ens95 longer	same
aurkb	ENSDART00000054823	632.304	0.401316	0.513109	NM_212566.2	617.581	0.43716	0.424116	TCONS_00024792	647.122	0.457383	0.4069	Ens95 longer	same
auts2a	ENSDART00000137928	1070.32	-1.1349	0.0239471	XM_009305336.1	1050.94	-1.15262	0.019528	ENSDART00000137928	1096.18	-1.07888	0.0317469	same	same
avd	ENSDART00000189789				NM_001201442.1				TCONS_00008847				same	same
aven	ENSDART00000019759	299.917	0.0134448	0.991842	NM_001045292.2	306.665	0.00075586	0.999792	TCONS_00056551	309.367	0.0940677	0.923242	same	same
avil	ENSDART00000168562	60.7194	0.487456	0.754215	NM_001040365.1	60.3988	0.479756	0.729843	TCONS_00012271	61.7682	0.543253	0.720504	same	same
avl9	ENSDART00000158399	409.91	0.269115	0.741471	XM_021480162.1	409.924	0.264987	0.709295	TCONS_00017095	417.923	0.314589	0.664986	same	same
avp	ENSDART00000148651	0.322679	-6.59297	0.00823097	NM_178293.2	0.322429	-6.59331	0.00867777	TCONS_00117047	0.323125	-6.55214	0.0137098	same	same
avpr1aa	ENSDART00000115001	18.7109	0.645382	0.772408	NM_001301114.1	9.68739	-0.0499008	1	ENSDART00000115001	19.0592	0.710147	0.751145	same	same
avpr1ab	ENSDART00000067309	1072.5	3.21346	7.83208e-12	NM_001297676.1	125.362	2.55477	0.0074742	TCONS_00093389	1091.12	3.2529	1.52538e-12	Ens95 longer	same
avpr2ab	ENSDART00000148769	7.40745	-1.06712	0.734842	XM_001922007.6	22.89	-0.711915	0.630271	TCONS_00070455	80.4075	-0.813618	0.337124	RefSeq longer	V4 longer
axdnd1	ENSDART00000136908	11.293	-1.83656	0.0918866	NM_001089377.1	11.2924	-1.83647	0.08641	TCONS_00066459	11.9537	-1.72151	0.131427	same	same
axin1	ENSDART00000166729	1258.81	-0.273123	0.687931	XM_009299708.3	1276.34	-0.276514	0.639345	ENSDART00000166729	1301.36	-0.229995	0.728524	Ens95 longer	same
axin2	ENSDART00000176127	918.399	-0.779734	0.122775	NM_131561.1	500.049	-0.814563	0.0389678	TCONS_00087228	938.106	-0.731034	0.123	Ens95 longer	same
azi2	ENSDART00000170074	4.4912	-1.41236	0.678955	NM_214733.1	27.7366	-0.862253	0.435688	rna44807	28.4195	-0.800663	0.51846	RefSeq longer	same
azin1a	ENSDART00000056101	663.459	2.38323	7.33683e-05	XM_005158442.3	327.606	1.7825	0.00547598	TCONS_00036461	3929.73	2.9926	1.21448e-08	same	V4 longer
azin1b	ENSDART00000137611	2699.93	0.142677	0.844102	NM_001007159.2	2698.8	0.144573	0.812964	TCONS_00048910	2754.85	0.195	0.748856	same	same
b2m	ENSDART00000075127	270.092	1.11574	0.189524	NM_131163.2	266.642	1.10127	0.196165	ENSDART00000075127	276.302	1.16569	0.17033	same	same
b2ml	ENSDART00000139649	6104.56	0.971248	0.102181	NM_213126.2	6096.48	0.971388	0.0852036	TCONS_00119465	6324.25	0.980869	0.0758315	same	same
b3galt2	ENSDART00000159165	435.382	-0.788978	0.189414	NM_207101.1	422.813	-0.769769	0.185301	TCONS_00066846	463.107	-0.729724	0.222547	same	V4 longer
b3galt6	ENSDART00000160777	65.694	-0.854158	0.339598	XM_005155657.4	7.76573	-0.967633	1	TCONS_00010200	67.4107	-0.787324	0.394715	Ens95 longer	same
b3gat1a	ENSDART00000059344	6.73377	-3.1335	0.130781	XM_005173645.4	152.457	-1.58051	0.00520511	TCONS_00044476	415.61	-1.35671	0.0279067	RefSeq longer	V4 longer
b3gat1b	ENSDART00000077619	74.4708	-1.8124	0.0104773	XM_021479451.1	32.2149	-2.37922	0.00314495	TCONS_00009658	75.8701	-1.76797	0.0132165	Ens95 longer	same
b3gat2	ENSDART00000050303	75.2989	-2.15411	0.00147877	XM_021480561.1	272.619	-1.01607	0.0936296	TCONS_00019836	277.213	-0.966003	0.121701	RefSeq longer	Ens95/RefSeq longer
b3gat3	ENSDART00000149966	210.985	-0.608522	0.377529	NM_001015059.2	17.059	-1.1469	0.404622	TCONS_00111761	216.146	-0.552386	0.4318	Ens95 longer	same
b3glcta	ENSDART00000159634	169.736	-0.0747753	0.952003	NM_001302251.1	169.74	-0.0746616	0.942139	TCONS_00028285	172.878	-0.0267487	0.983065	same	same
b3glctb	ENSDART00000109563	10.9594	-0.797691	0.68421	NM_001302248.1	10.9629	-0.797438	1	TCONS_00007203	13.2363	-0.773996	0.661849	same	V4 longer
b3gnt2a	ENSDART00000074221	4.51165	-1.86944	0.449004	NM_212840.1	6.77259	-2.14932	0.0823824	TCONS_00005159	12.901	-1.86179	0.0897359	same	V4 longer
b3gnt2b	ENSDART00000132755	581.032	1.28972	0.00115197	XM_017351684.2	580.437	1.30408	0.000624044	TCONS_00037542	592.851	1.32677	0.000319786	same	V4 longer
b3gnt3.1	ENSDART00000063834	6.76209	-1.41856	0.580837	XM_005166835.4	6.76105	-1.41897	1	TCONS_00120288	7.09597	-1.32525	0.636027	same	same
b3gnt5a	ENSDART00000132365	1499.07	1.97701	0.000116549	NM_198876.1	1432.93	1.9395	0.000196922	TCONS_00010537	1535.56	2.02739	8.50181e-05	Ens95 longer	same
b3gnt5b	ENSDART00000136074	25.169	-1.11498	0.30349	NM_001100045.1	25.1671	-1.11501	0.281116	TCONS_00052603	25.5263	-1.07967	0.332496	same	same
b3gnt7	ENSDART00000056169	132.901	2.2418	0.000463722	NM_201294.1	132.571	2.23818	0.000470809	TCONS_00067315	2207.18	2.66521	2.05166e-10	same	V4 longer
b3gntl1	ENSDART00000063750	13.5266	-0.445522	0.865923	NM_001033742.1	13.5324	-0.25505	1	TCONS_00002600	21.6334	-0.45943	0.792344	same	V4 longer
b4galnt1a	ENSDART00000087815	10.6651	0.520871	0.896601	XM_005162256.4	54.1936	-0.0520834	0.968718	TCONS_00073285	55.2344	0.0326707	0.984074	RefSeq longer	same
b4galnt1b	ENSDART00000154991	18.4029	-0.721905	0.753353	XM_005166089.4	18.3929	-0.722663	0.726762	TCONS_00106866	18.751	-0.742322	0.754397	same	V4 longer
b4galnt2.2	ENSDART00000103858	0.968036	-3.1728	0.35719	XM_017354751.2	0.968036			ENSDART00000103858	0.969376	-3.11784	1	Ens95 longer	same
b4galnt3a	ENSDART00000145955	6.44751	-1.48745	0.579303	XM_021475272.1	20.9955	-1.29777	0.336502	rna9895	21.3509	-1.24846	0.400622	RefSeq longer	same
b4galnt3b	ENSDART00000169401	83.2427	-1.04923	0.18803	XM_001342847.8	68.6874	-1.12397	0.129481	TCONS_00041380	84.9743	-0.991873	0.212805	Ens95 longer	same
b4galnt4a	ENSDART00000083407	184.81	-1.03621	0.336424	XM_001920840.7	73.0002	-1.00726	0.427858	TCONS_00078786	302.464	-1.07852	0.236685	Ens95 longer	V4 longer
b4galnt4b	ENSDART00000067857	36.9805	-1.70736	0.148754	XM_682637.7	36.9927	-1.72631	0.134404	rna25480	38.0101	-1.65815	0.182093	same	same
b4galt1l	ENSDART00000168437	107.97	1.45474	0.06137	XM_005157336.4	127.316	1.26628	0.0912716	TCONS_00024747	473.557	1.21124	0.036294	RefSeq longer	V4 longer
b4galt2	ENSDART00000114663	8.69623	-2.04545	0.297412	XM_005163473.4	135.479	-1.43599	0.0679797	ENSDART00000114663	9.03164	-1.96608	0.358773	RefSeq longer	Ens95/RefSeq longer
b4galt3	ENSDART00000089999	51.4733	-0.688413	0.61873	XM_009296773.3	65.3084	-0.851267	0.480572	TCONS_00072835	216.84	-0.604989	0.302998	RefSeq longer	V4 longer
b4galt4	ENSDART00000172097	63.8754	0.821052	0.426531	NM_001007401.1	63.8692	0.847047	0.375158	TCONS_00104895	430.727	0.0531968	0.959873	same	V4 longer
b4galt5	ENSDART00000055099	30.3209	0.574792	0.741898	NM_001045332.1	29.6769	0.49909	0.758919	TCONS_00069894	33.9013	0.582524	0.721092	Ens95 longer	V4 longer
b4galt6	ENSDART00000147451	2621.25	0.551982	0.377291	NM_200938.1	1177.54	0.585186	0.40809	TCONS_00058009	2879.94	0.616261	0.288661	Ens95 longer	same
b4galt7	ENSDART00000170614	127.513	-0.787894	0.429524	XM_021481002.1	116.862	-0.848699	0.405068	TCONS_00025832	130.613	-0.731668	0.477575	Ens95 longer	same
b4gat1	ENSDART00000111708	182.703	-0.724478	0.224709	NM_001278828.1	23.3001	-0.131342	0.962782	ENSDART00000111708	186.849	-0.672281	0.254786	Ens95 longer	same
b9d2	ENSDART00000008099	72.2321	-0.854841	0.274021	NM_001002394.1	72.2386	-0.789132	0.317014	TCONS_00061564	73.9515	-0.798053	0.313196	same	same
baalca	ENSDART00000111383	4.85479	-0.408647	0.937187	XM_021466742.1	11.2938	-0.778869	1	TCONS_00033733	30.016	-0.581559	0.691309	RefSeq longer	V4 longer
baalcb	ENSDART00000152588	14.8254	-2.26498	0.116196	XM_003200691.5	15.1414	-2.26075	0.100201	TCONS_00058535	20.3098	-2.07537	0.131716	same	V4 longer
babam1	ENSDART00000122262	437.441	0.0722215	0.949746	XM_017358217.2	436.17	0.0870692	0.923583	TCONS_00012592	446.799	0.129802	0.896215	same	same
babam2	ENSDART00000056742	678.277	0.543932	0.370694	XM_021467158.1	635.707	0.611285	0.275358	TCONS_00038255	691.191	0.596293	0.270821	Ens95 longer	same
bace2	ENSDART00000065824	45.2772	-0.361459	0.905125	NM_001005991.2	225.417	-0.457445	0.895255	TCONS_00027200	269.278	-0.409892	0.835369	same	same
bach1a	ENSDART00000155381	55.507	0.52847	0.739399	NM_001040313.1	24.5295	0.786185	0.639281	TCONS_00029421	356.207	0.783928	0.226598	same	V4 longer
bach2a	ENSDART00000156726	160.041	0.89756	0.190768	XM_680223.9	116.57	0.971338	0.303384	TCONS_00037182	291.468	0.766429	0.193455	Ens95 longer	V4 longer
bach2b	ENSDART00000131857	208.46	-0.00767781	0.995039	XM_005160548.4	175.972	0.0560365	0.957252	TCONS_00058718	921.51	-0.352067	0.734569	RefSeq longer	V4 longer
badb	ENSDART00000077219	805.255	1.95881	5.97957e-05	NM_001270595.1	806.818	1.96404	4.19423e-05	TCONS_00114935	821.566	2.00608	2.20904e-05	same	same
bag1	ENSDART00000017144	373.178	0.425389	0.500885	NM_001098736.2	373.229	0.427289	0.454889	rna3879	381.48	0.478768	0.399732	same	same
bag2	ENSDART00000049684	805.817	3.25834	2.30099e-05	NM_201000.2	803.851	3.23331	1.43823e-05	TCONS_00020846	4604.48	3.08491	4.30849e-05	same	V4 longer
bag3	ENSDART00000057689	862.259	1.49112	0.0983993	NM_001003533.2	861.035	1.49422	0.0869221	TCONS_00019746	1545.94	1.54674	0.0877115	same	V4 longer
bag4	ENSDART00000063396	111.037	-0.78813	0.348348	NM_001256729.2	111.716	-0.774351	0.332668	TCONS_00121879	114.115	-0.728541	0.40843	same	same
bag5	ENSDART00000145914	38.2835	-0.602893	0.697706	XM_005156686.4	37.9729	-0.614689	0.659444	TCONS_00021432	295.4	-0.450783	0.389925	same	same
bag6	ENSDART00000110964	796.526	0.335683	0.630272	XM_005157765.2	847.974	0.335324	0.575704	TCONS_00030853	866.896	0.383848	0.52192	same	same
bahcc1a	ENSDART00000162930	499.806	1.01447	0.0569889	XM_009299826.3	559.93	1.0504	0.0510342	TCONS_00083821	2277.77	0.988868	0.00509998	RefSeq longer	V4 longer
bahcc1b	ENSDART00000180807	3065.05	0.513542	0.234456	XM_009306820.3	3033.73	0.516288	0.189496	TCONS_00017896	3131.18	0.562521	0.127243	Ens95 longer	same
bahd1	ENSDART00000154013	877.779	0.491091	0.351396	XM_005158826.4	868.492	0.509909	0.277265	TCONS_00040299	895.509	0.538468	0.245873	Ens95 longer	same
baiap2l1a	ENSDART00000042006	59.6592	-0.113521	0.93781	NM_198922.1	55.7988	-0.17349	0.888318	TCONS_00017240	60.7123	-0.0538096	0.972823	Ens95 longer	same
baiap2l1b	ENSDART00000101957	46.4705	0.554588	0.686068	NM_001017830.1	46.4635	0.510945	0.685497	TCONS_00087475	47.5051	0.569815	0.678484	same	same
baiap2l2a	ENSDART00000156814	9.94841	-1.30325	0.623542	XM_002661156.5	11.9001	-1.20666	0.49842	TCONS_00085441	10.2888	-1.40095	0.603853	same	same
baiap3	ENSDART00000156693	33.9346	-0.98997	0.507494	XM_003198157.5	33.9332	-0.990307	0.476883	TCONS_00083479	38.8338	-0.811783	0.612675	same	V4 longer
bambia	ENSDART00000077732	1155.04	1.4546	0.000225376	NM_131784.2	1154.51	1.45743	0.000138003	TCONS_00015340	1178.34	1.50286	6.035e-05	same	same
bambib	ENSDART00000159525	875.073	1.26098	0.0178428	NM_001002189.1	874.735	1.26078	0.014505	TCONS_00049707	894.721	1.28876	0.0126195	same	same
banf1	ENSDART00000053794	4673.28	0.719915	0.241603	NM_205562.1	4671.65	0.721403	0.20887	TCONS_00064075	4768.18	0.768912	0.179502	same	same
banp	ENSDART00000016310	196.755	-0.170926	0.870696	XM_005160361.4	198.098	-0.167456	0.8523	TCONS_00079028	202.868	-0.111752	0.921192	same	same
bap1	ENSDART00000091777	202.57	-0.507614	0.551425	NM_001163837.1	202.916	-0.487166	0.537262	TCONS_00068247	207.397	-0.4576	0.600329	same	same
barhl1a	ENSDART00000051474	37.6832	-2.37877	0.00158684	NM_001017712.2	37.6951	-2.38813	0.00145747	TCONS_00103132	38.7077	-2.30848	0.00314583	same	same
barhl2	ENSDART00000165609	411.653	-0.386623	0.82318	NM_205740.1	405.802	-0.397273	0.794717	ENSDART00000165609	425.897	-0.304943	0.86767	same	same
barx1	ENSDART00000023889	48.3293	-3.32847	8.86523e-13	NM_001024949.1	48.3426	-3.32506	7.5099e-13	ENSDART00000023889	49.0479	-3.28677	2.60823e-12	same	same
basp1	ENSDART00000075392	802.049	0.0228067	0.990649	NM_001202454.1	113.661	0.335908	0.798383	rna4437	116.074	0.39029	0.785538	Ens95 longer	Ens95/RefSeq longer
batf	ENSDART00000005548	1.92393	-2.00801	0.618053	XM_005160860.4	3.21008	-1.77206	1	rna52502	3.53428	-1.63545	0.686612	RefSeq longer	same
batf3	ENSDART00000147529	41.6474	0.784109	0.593979	NM_001045392.1	30.6399	0.482856	0.760057	ENSDART00000147529	42.6711	0.855854	0.555513	same	same
baxa	ENSDART00000011691	1444.37	1.60207	2.72335e-05	NM_131562.2	1396.38	1.63087	1.76761e-05	TCONS_00086532	1472.92	1.64219	5.75015e-06	same	same
baxa	ENSDART00000151341				NM_001328066.1	46.0656	1.07057	0.367687	TCONS_00086528	1472.92	1.64219	5.75015e-06	same	same
baxb	ENSDART00000040900	497.278	1.5315	0.00921144	NM_001013296.2	496.55	1.5487	0.00756831	TCONS_00085952	505.398	1.57473	0.00616593	same	same
baz1a	ENSDART00000156078				XM_017351766.2	2622.42	0.637968	0.228109	ENSDART00000156078	2673	0.686713	0.200249	same	same
baz2a	ENSDART00000157828	1919.31	-0.11833	0.887629	XM_021469791.1	1989.29	-0.124452	0.857055	TCONS_00072225	2035.14	-0.0715487	0.934342	RefSeq longer	same
baz2ba	ENSDART00000190817	2247.04	0.110191	0.888782	XM_017356581.2	3310.59	0.107016	0.856726	TCONS_00105815	3379.08	0.154778	0.799456	RefSeq longer	same
bbc3	ENSDART00000137918	1039.78	2.41986	6.67992e-05	XM_009291674.3	1040.53	2.41138	5.93342e-05	TCONS_00030234	1057.98	2.45493	3.61581e-05	same	same
bbip1	ENSDART00000146280	515.785	0.552543	0.500536	NM_001166123.1	515.065	0.554511	0.455542	TCONS_00067096	524.245	0.601917	0.422541	same	same
bbox1	ENSDART00000173798	197.671	-0.344133	0.668647	XM_005168903.4	197.667	-0.340319	0.633114	TCONS_00112336	201.508	-0.291909	0.719213	same	same
bbs1	ENSDART00000113061	97.3819	-0.522243	0.533763	NM_001098251.1	72.538	-0.568436	0.479361	TCONS_00061881	157.194	-0.707898	0.219233	same	V4 longer
bbs10	ENSDART00000101238	15.7917	-1.4966	0.247075	NM_001089463.1	15.798	-1.49632	0.230876	ENSDART00000101238	16.1376	-1.43568	0.293388	same	same
bbs12	ENSDART00000188008	85.2575	0.119019	0.945057	XM_002667206.5	77.1751	0.525446	0.655412	ENSDART00000188008	86.3395	0.221037	0.887516	Ens95 longer	same
bbs2	ENSDART00000061000	176.955	-0.574049	0.329581	NM_152887.1	177.295	-0.557064	0.312786	TCONS_00043927	180.766	-0.520257	0.369295	same	same
bbs4	ENSDART00000092919	34.2373	-1.26672	0.213393	NM_001077466.2	32.9429	-1.02189	0.354238	TCONS_00077738	37.5076	-1.48242	0.0803077	Ens95 longer	V4 longer
bbs7	ENSDART00000083833	85.0667	-1.60268	0.0042318	NM_001077145.2	68.6213	-1.62197	0.0113806	TCONS_00026712	86.8069	-1.55159	0.00640256	Ens95 longer	same
bcam	ENSDART00000103176	2021.77	0.487798	0.589169	NM_001076627.1	4834.87	0.262226	0.70117	TCONS_00034919	4955.83	0.318679	0.640267	same	same
bcan	ENSDART00000162835	72.3921	-2.94525	6.0938e-05	NM_001083813.1	72.7329	-2.90656	7.87746e-05	TCONS_00035258	77.0139	-2.95278	0.000100049	same	V4 longer
bcap29	ENSDART00000007638	84.4216	0.840863	0.403089	NM_001024220.1	77.9904	1.08404	0.235874	TCONS_00087682	3416.71	3.25926	1.5599e-08	same	V4 longer
bcap31	ENSDART00000066107	217.221	0.351964	0.661151	NM_200092.1	217.567	0.36539	0.60426	TCONS_00117416	994.308	0.41431	0.457402	same	V4 longer
bcar1	ENSDART00000128965	2546.49	1.45937	0.000658684	NM_001135133.2	2546.84	1.45579	0.000445467	TCONS_00042112	2599.84	1.49602	0.000263974	same	same
bcas2	ENSDART00000064066	622.061	-0.146042	0.887956	NM_001007774.1	622.868	-0.142017	0.870469	TCONS_00120123	638.192	-0.0879194	0.937443	same	same
bcas3	ENSDART00000149957	425.354	0.495187	0.520136	NM_200622.1	420.485	0.503504	0.479281	ENSDART00000149957	432.08	0.540696	0.438579	same	same
bcat1	ENSDART00000067005	57.2704	-2.05099	0.00760483	NM_200064.1	51.8007	-2.14401	0.00984668	TCONS_00088581	58.6527	-1.98685	0.0126889	same	same
bcat2	ENSDART00000077119	923.996	0.311555	0.739789	NM_001002676.2	923.396	0.312509	0.702078	TCONS_00085778	941.443	0.362664	0.669803	same	same
bccip	ENSDART00000016635	2349	0.480826	0.559251	NM_001013475.2	2314.25	0.50456	0.49918	TCONS_00018310	2395	0.526999	0.489098	Ens95 longer	same
bcdin3d	ENSDART00000145014	4.18471	-1.05679	0.763671	XM_017353449.2	50.6236	-0.78835	0.42077	ENSDART00000145014	4.51279	-0.839202	0.830683	RefSeq longer	Ens95/RefSeq longer
bckdha	ENSDART00000059347	413.463	-0.380447	0.567227	NM_001024419.1	84.8703	-0.810997	0.561464	ENSDART00000059347	422.792	-0.325017	0.625236	Ens95 longer	same
bckdhbl	ENSDART00000131972	122.611	-1.63634	0.0156427	XM_005163841.4	125.246	-1.63596	0.0117934	TCONS_00085086	128.934	-1.5756	0.0198638	RefSeq longer	same
bckdk	ENSDART00000023676	1404.19	0.659843	0.181741	NM_213060.2	1411.88	0.66467	0.152363	TCONS_00101230	1437.28	0.715741	0.117174	same	same
bcl10	ENSDART00000109668	150.218	0.77303	0.445001	XM_021466653.1	8.41487	-0.692677	1	TCONS_00049558	153.667	0.814972	0.418554	Ens95 longer	same
bcl11aa	ENSDART00000087426	148.296	-1.13903	0.0479689	NM_001040391.1	90.6347	-0.101075	0.924705	TCONS_00019757	554.504	-1.08814	0.0617721	same	V4 longer
bcl11ba	ENSDART00000179739	610.883	-1.93096	0.0152166	NM_001328406.1	509.627	-1.96423	0.0137193	TCONS_00037267	628.645	-1.86005	0.0206618	same	same
bcl2a	ENSDART00000145290	619.07	0.637042	0.29006	NM_001030253.2	596.869	0.700645	0.237497	TCONS_00076996	1704.77	0.302412	0.595813	same	V4 longer
bcl2b	ENSDART00000149947	93.0753	-1.01363	0.367771	XM_001341178.7	77.9577	-0.899185	0.405647	TCONS_00052849	131.367	-0.907332	0.377486	Ens95 longer	V4 longer
bcl2l1	ENSDART00000012507	726.144	0.880275	0.0940787	XM_005162026.4	809.129	0.812067	0.104439	TCONS_00072742	2676.08	0.853598	0.0897359	RefSeq longer	V4 longer
bcl2l10	ENSDART00000122377	8224.33	2.85099	1.23491e-12	NM_194398.2	8214.92	2.85153	3.91664e-13	TCONS_00042783	8368.92	2.89641	2.97397e-14	same	same
bcl2l13	ENSDART00000140632	450.498	-0.376532	0.559552	XM_005159108.4	448.634	-0.351028	0.554185	TCONS_00044049	460.53	-0.324013	0.617488	Ens95 longer	same
bcl2l16	ENSDART00000179692	32.5919	-1.32038	0.226197	XM_021478172.1	8.71283	-0.947089	1	TCONS_00119545	32.9592	-1.28877	0.244473	Ens95 longer	same
bcl3	ENSDART00000130641	253.968	2.10268	0.00241596	XM_688922.9	761.586	3.00336	7.38399e-07	TCONS_00035048	778.875	3.01455	6.12002e-07	RefSeq longer	V4 longer
bcl6aa	ENSDART00000131126	153.588	0.172551	0.891904	XM_017356456.2	279.848	-0.108135	0.917427	TCONS_00109022	303.763	-0.0623827	0.961214	RefSeq longer	V4 longer
bcl6ab	ENSDART00000138081	200.52	0.212361	0.813209	XM_005171137.3	200.878	0.217671	0.778434	TCONS_00052736	205.009	0.266903	0.747201	same	same
bcl6b	ENSDART00000100808	6090.43	7.57463	5.80699e-43	XM_021477763.1	6093.52	7.53202	1.21683e-46	TCONS_00111390	6216.12	7.64625	5.56155e-48	same	same
bcl7a	ENSDART00000136439	907.849	-0.520008	0.383683	NM_212560.1	907.046	-0.518494	0.344581	TCONS_00100379	928.24	-0.462738	0.423555	same	same
bcl7ba	ENSDART00000184565	158.086	0.137833	0.92627	NM_213165.1	112.986	0.50855	0.6646	rna32243	116.045	0.568839	0.655323	Ens95 longer	Ens95/RefSeq longer
bcl7bb	ENSDART00000059135	327.868	-0.0624201	0.958828	NM_001006018.1	328.578	-0.0578172	0.952937	ENSDART00000059135	335.792	-0.00667901	0.995072	same	same
bcl9	ENSDART00000188153	1037.5	-0.0870413	0.922751	XM_005170982.4	1034.25	-0.1042	0.881636	ENSDART00000188153	1066.44	-0.0429848	0.961993	Ens95 longer	same
bcl9l	ENSDART00000077357	170.336	-0.380669	0.684034	XM_005159238.4	333.032	-0.173787	0.792194	TCONS_00044649	447.602	-0.0599869	0.948316	RefSeq longer	V4 longer
bco1	ENSDART00000162471	177.463	-0.147395	0.896724	NM_001328495.1	176.476	-0.126572	0.898666	TCONS_00113543	180.294	-0.119393	0.918039	same	V4 longer
bco1l	ENSDART00000168287	22.6459	0.17802	0.953543	NM_200608.1	27.1591	0.394892	0.857898	TCONS_00113539	28.4901	0.332113	0.896722	same	same
bco2a	ENSDART00000133981	66.101	-0.58045	0.615157	XM_002662014.6	6.74684	-0.786121	1	TCONS_00103136	67.1649	-0.563887	0.629356	Ens95 longer	V4 longer
bco2b	ENSDART00000061139	17.7215	-1.68968	0.0691274	NM_001040312.1	17.7239	-1.72158	0.0573487	TCONS_00030144	18.0704	-1.64675	0.0894239	same	same
bco2l	ENSDART00000002221	27.4325	-0.819327	0.628115	XM_021476337.1	27.4402	-0.818499	0.597899	TCONS_00099503	28.1175	-0.756385	0.675867	same	same
bcor	ENSDART00000188207	1405.92	-0.0777211	0.93867	XM_005173943.4	1399.54	-0.0810759	0.919192	TCONS_00066271	1441.25	-0.0260509	0.980205	same	same
bcorl1	ENSDART00000190857	207.958	-0.473023	0.446475	XM_001332259.8	203.48	-0.451753	0.426491	TCONS_00024449	214.065	-0.425084	0.477857	Ens95 longer	same
bcr	ENSDART00000191864	255.087	-1.25197	0.0501367	XM_002665937.5	83.2577	-1.06551	0.293058	TCONS_00061098	269.057	-1.16409	0.0705415	Ens95 longer	same
bcs1l	ENSDART00000022246	70.17	-0.945788	0.667033	NM_201182.2	70.4882	-0.939225	0.638526	TCONS_00124169	72.2156	-0.878698	0.705229	same	same
bdh1	ENSDART00000147468	88.4208	0.897601	0.299529	NM_001089509.1	88.4263	0.907544	0.267738	TCONS_00074324	515.007	-0.00836164	0.992753	same	V4 longer
bdnf	ENSDART00000014843	194.426	-1.31016	0.0348409	XM_009303234.3	212.547	-1.26622	0.0276194	TCONS_00115302	237.086	-1.12492	0.0383681	same	same
bean1	ENSDART00000121826	243.171	-0.630056	0.428178	XM_005166452.4	12.889	-0.204914	1	TCONS_00112909	253.872	-0.554769	0.484381	Ens95 longer	same
becn1	ENSDART00000143401	175.79	0.0652585	0.964524	NM_200872.1	175.513	0.0629536	0.958911	TCONS_00014899	182.513	0.131676	0.92359	same	same
bend3	ENSDART00000132820	346.911	0.452714	0.472797	NM_001145591.1	347.284	0.44524	0.435328	TCONS_00022130	354.518	0.491461	0.395762	same	same
BEND4	ENSDART00000183648	9.68094	-1.45322	0.359348	XM_690223.9	6.77972	-1.13209	1	TCONS_00024513	9.69465	-1.41707	0.396885	Ens95 longer	same
bend5	ENSDART00000133114	10.6382	-1.20843	0.548979	NM_001327767.1	10.636	-1.17008	0.534965	TCONS_00120420	445.23	0.0989609	0.925495	Ens95 longer	V4 longer
bet1	ENSDART00000004514	125.497	0.199425	0.889952	NM_001002046.1	125.166	0.200028	0.870311	TCONS_00049133	409.141	0.464489	0.612801	same	V4 longer
bet1l	ENSDART00000142794	302.526	0.502659	0.557927	NM_001003998.1	295.112	0.529386	0.502486	TCONS_00079765	310.709	0.558707	0.48295	same	same
bfsp2	ENSDART00000004712	23.2543	0.468148	0.836978	NM_001008633.2	19.3531	0.260034	0.910778	TCONS_00053958	25.5475	0.630416	0.775687	same	same
bglap	ENSDART00000100845				NM_001083857.3				ENSDART00000100845				same	same
bglapl	ENSDART00000171799	9.00989	-1.9801	0.274008	NM_001291889.1	9.01097	-1.9794	0.25754	TCONS_00130080	9.66929	-1.86631	0.34417	same	same
bgna	ENSDART00000027225	33.2412	-1.88831	0.0103947	NM_001002227.1	33.241	-1.88798	0.00947973	TCONS_00120353	33.9312	-1.84499	0.0145721	same	same
bhlha15	ENSDART00000112119	5.17474	-0.70011	0.854993	NM_001077652.1	5.17328	-0.700301	1	TCONS_00015017	5.18114	-0.643269	0.877441	same	same
bhlha9	ENSDART00000172548	11.2997	0.878644	0.776765	NM_001202415.1	11.3025	0.879187	1	TCONS_00007465	11.3156	0.879513	0.784807	same	same
bhlhe23	ENSDART00000054736	214.839	-0.939224	0.571038	NM_001030133.1	215.63	-0.936316	0.540452	TCONS_00072634	222.63	-0.862986	0.617148	same	same
bhlhe40	ENSDART00000026017	2241.57	0.0478615	0.962002	NM_212679.2	2243.18	0.0516725	0.94955	TCONS_00013911	2294	0.105591	0.900481	same	same
bhlhe41	ENSDART00000061106	472.423	-1.35404	0.142196	NM_001039107.1	101.152	-0.347036	0.760719	TCONS_00041770	486.078	-1.29261	0.168618	Ens95 longer	same
bhmt	ENSDART00000185997	307.32	-2.9771	5.60405e-07	NM_001012480.1	307.755	-2.96973	5.61289e-07	TCONS_00062599	315.874	-2.9235	1.30731e-06	same	same
bicc1a	ENSDART00000155300	39.9817	-2.69456	6.46673e-06	XM_009293019.3	27.0988	-1.56395	0.0838125	TCONS_00039757	41.0101	-2.63581	1.39721e-05	Ens95 longer	same
bicc2	ENSDART00000031211	16.1535	-1.51494	0.223064	NM_203420.1	16.1504	-1.51516	0.207827	TCONS_00025045	16.175	-1.50494	0.242787	same	same
bicd2	ENSDART00000109235		0.444171	0.747715	XM_680437.6	282.124	0.575305	0.399099	TCONS_00011775	1364.58	1.0024	0.00773184	RefSeq longer	Ens95/RefSeq longer
bicdl1	ENSDART00000132404	14.839	-0.629442	0.774613	XM_021478542.1	19.9839	-1.02755	0.498414	TCONS_00119873	35.4719	-1.04991	0.392112	RefSeq longer	V4 longer
bicdl2	ENSDART00000074268	118.608	-0.0669587	0.970157	XM_005165558.4	120.518	-0.172398	0.894375	TCONS_00101062	123.296	-0.121046	0.941304	RefSeq longer	same
bicdl2l	ENSDART00000125709	89.8369	-0.101678	0.95401	XM_002665975.5	130.192	0.414078	0.670377	TCONS_00061789	92.2326	-0.0319891	0.986308	RefSeq longer	Ens95/RefSeq longer
bicra	ENSDART00000098540	584.988	-0.454564	0.456441	XM_001922789.7	576.697	-0.438646	0.442454	ENSDART00000098540	610.084	-0.384624	0.525165	Ens95 longer	same
bicral	ENSDART00000027379	166.507	-0.0343757	0.97932	XM_005156379.4	232.721	0.0900376	0.927078	TCONS_00017910	787.248	0.315588	0.586868	RefSeq longer	V4 longer
bida	ENSDART00000182585	595.181	1.68586	1.99317e-05	NM_001079826.1	443.391	1.65199	0.000181216	TCONS_00042030	607.344	1.7463	3.14794e-06	Ens95 longer	same
bik	ENSDART00000066977	229.147	-0.360204	0.733405	NM_001045038.2	228.828	-0.36837	0.691785	TCONS_00088675	233.017	-0.342997	0.742181	same	same
bin1b	ENSDART00000081761	125.477	0.441427	0.671596	NM_001004602.2	125.476	0.441603	0.636962	ENSDART00000081761	127.915	0.493136	0.622314	same	same
bin2b	ENSDART00000184798	580.968	2.12804	0.000143365	XM_005166011.4	568.126	2.22062	0.000256907	TCONS_00106845	594.424	2.17668	0.000111661	Ens95 longer	same
birc2	ENSDART00000111150	2474.91	0.564237	0.269162	XM_005161156.4	2374.87	0.567026	0.217708	TCONS_00061671	2519.77	0.613076	0.167548	Ens95 longer	same
birc5a	ENSDART00000115088	775.159	0.749944	0.249958	NM_194397.3	774.184	0.753367	0.215931	TCONS_00017892	788.85	0.794424	0.193718	same	same
birc5b	ENSDART00000134710	16.828	1.61379	0.663297	NM_145195.1	16.828	-3.03737	1	TCONS_00071016	19.1101	1.49087	0.696622	same	V4 longer
birc6	ENSDART00000157328	1115.79	0.405936	0.526203	XM_009293036.3	1109.86	0.403999	0.488201	TCONS_00037420	1143.61	0.460918	0.43293	Ens95 longer	same
birc7	ENSDART00000143618	7.73844	0.0573261	0.989469	NM_001098768.1	24.2072	1.41877	0.407711	TCONS_00070270	72.3162	0.21261	0.860231	same	V4 longer
blcap	ENSDART00000073847	1684.81	0.931945	0.0614668	NM_131493.2	1683.18	0.932801	0.048572	ENSDART00000073847	1715.62	0.978349	0.0343103	same	same
blf	ENSDART00000063318	1258.96	4.2648	1.37765e-07	XM_005173954.3	1271.49	4.26513	1.22826e-07	TCONS_00066178	1301.87	4.31109	1.39246e-07	same	same
blk	ENSDART00000020099	91.7841	1.21	0.305356	XM_017352511.2	83.7549	1.4517	0.182728	TCONS_00056020	97.0862	1.231	0.269388	Ens95 longer	same
blm	ENSDART00000110746	123.137	-0.352822	0.783139	XM_017352049.2	163.171	-0.237861	0.826901	TCONS_00042256	167.231	-0.204361	0.876253	RefSeq longer	same
blmh	ENSDART00000060255	720.073	0.476473	0.449983	NM_200018.1	717.537	0.522745	0.35316	ENSDART00000060255	735.336	0.530051	0.35174	same	same
blnk	ENSDART00000062684	34.7542	-0.497382	0.853175	XM_017358727.1	34.7541	-0.487861	0.837387	ENSDART00000062684	35.4543	-0.432118	0.881006	same	same
bloc1s1	ENSDART00000013835	179.334	0.121647	0.920412	NM_001044350.2	182.555	0.0360518	0.9738	rna56098	186.05	0.0822063	0.947178	RefSeq longer	same
bloc1s2	ENSDART00000144551	235.933	0.329686	0.704759	NM_001033101.2	239.189	0.322483	0.676268	TCONS_00055711	244.352	0.36329	0.659073	same	same
bloc1s4	ENSDART00000136187	220.131	0.0586584	0.968113	NM_001003475.1	224.389	0.0132668	0.992618	TCONS_00048554	225.964	0.120986	0.927571	same	same
bloc1s5	ENSDART00000186594	181.62	0.402104	0.643159	NM_001030066.1	170.978	0.542265	0.490589	TCONS_00076138	185.428	0.450374	0.573321	Ens95 longer	same
bloc1s6	ENSDART00000142945	505.558	0.574933	0.365641	NM_001080697.2	509.136	0.57023	0.328638	TCONS_00043456	524.346	0.613208	0.294215	same	V4 longer
blvrb	ENSDART00000015034	165.342	0.356933	0.677227	NM_001002686.1	165.361	0.378904	0.613947	TCONS_00043067	169.137	0.409399	0.60279	same	same
blzf1	ENSDART00000108579	413.282	0.713672	0.241047	NM_001144803.1	412.668	0.711561	0.211883	TCONS_00000074	420.645	0.761261	0.174766	same	same
bmb	ENSDART00000152329	50.3215	-0.664701	0.547965	NM_001270554.1	47.7419	-0.668263	0.524596	ENSDART00000152329	51.3607	-0.625029	0.586354	same	same
bmf2	ENSDART00000153087	43.1712	-0.146761	0.934518	XM_005160866.4	458.905	1.27154	0.0039523	TCONS_00059898	467.965	1.32488	0.00204107	RefSeq longer	same
bmi1a	ENSDART00000066765	167.041	-0.867125	0.254623	NM_194366.1	164.514	-0.869184	0.238495	TCONS_00074822	171.176	-0.804579	0.305376	same	same
bmp15	ENSDART00000054591	19.3425	-0.0514211	0.99084	NM_001020484.1	13.5335	-0.00498534	1	TCONS_00116213	19.3711	-0.0272513	0.994364	Ens95 longer	same
bmp16	ENSDART00000168937	2871.17	3.82405	1.0518e-23	NM_001171776.1	545.818	3.49308	2.25293e-08	TCONS_00043133	2925.62	3.87698	3.64363e-28	Ens95 longer	same
bmp1a	ENSDART00000127875	492.351	-0.29124	0.753377	XM_017357365.2	530.389	-0.255212	0.756802	TCONS_00122201	684.913	-0.675113	0.2047	RefSeq longer	V4 longer
bmp1b	ENSDART00000190510	440.311	1.52848	0.00191842	NM_001039812.1	435.43	1.55268	0.00143075	ENSDART00000190510	448.363	1.58335	0.000785137	Ens95 longer	same
bmp2b	ENSDART00000131169	124.126	-1.61569	0.080837	NM_131360.2	124.495	-1.61002	0.0747541	TCONS_00057271	127.556	-1.55744	0.103737	same	same
bmp2k	ENSDART00000166657	801.232	0.440905	0.487398	NM_001193540.1	1567.28	0.270874	0.69496	ENSDART00000166657	820.189	0.4957	0.392699	same	same
bmp4	ENSDART00000075150	204.731	-1.45985	0.00605962	NM_131342.2	204.761	-1.45683	0.00509058	TCONS_00038613	209.227	-1.41203	0.0085027	same	same
bmp5	ENSDART00000161162	76.7781	-2.26768	6.5087e-05	NM_201051.1	77.1111	-2.26237	5.88226e-05	TCONS_00018647	78.502	-2.21953	0.00011364	same	same
bmp6	ENSDART00000019705	388.2	2.66993	2.70415e-07	XM_021470158.1	387.2	2.65088	2.49037e-07	TCONS_00074462	494.867	2.42554	2.12e-06	same	V4 longer
bmp7a	ENSDART00000016472	19.7022	-0.836628	0.601341	NM_131321.2	7.11224	-0.540531	1	ENSDART00000016472	20.0505	-0.773069	0.645165	Ens95 longer	same
bmp8a	ENSDART00000103253	132.239	0.415967	0.774685	NM_001044971.1	131.957	0.41329	0.749911	TCONS_00048978	257.385	0.510815	0.595813	same	same
bmpr1aa	ENSDART00000026768	3247.93	1.80198	0.000302325	NM_131621.3	1469.5	0.960792	0.204003	TCONS_00019563	1464.62	0.990827	0.195799	same	same
bmpr1ab	ENSDART00000166769	318.358	-0.381477	0.705011	NM_001004585.1	318.683	-0.37855	0.672495	TCONS_00017485	723.51	-0.0711504	0.941083	same	V4 longer
bmpr1ba	ENSDART00000158913	105.089	-1.55627	0.00308827	XM_021476002.1	105.74	-1.55759	0.00252703	rna17915	108.148	-1.50893	0.0045333	same	same
bmpr1bb	ENSDART00000114261	20.2972	-0.992068	0.413773	NM_001114924.1	20.9426	-1.02536	0.360335	TCONS_00007962	29.3484	-1.97891	0.00694757	same	same
bmpr2a	ENSDART00000056764	916.44	1.80317	0.000149918	XM_005165835.4	941.32	1.80153	0.000355458	TCONS_00108350	5491.11	1.92993	7.173e-11	RefSeq longer	V4 longer
bmpr2b	ENSDART00000125961	220.895	0.862261	0.293331	NM_001039807.1	219.916	0.887062	0.25949	TCONS_00122901	772.79	1.28424	0.00904002	same	V4 longer
bms1	ENSDART00000053761	349.847	0.0746808	0.948341	NM_001111150.2	361.144	0.0510179	0.958523	TCONS_00015643	369.376	0.0989896	0.927972	RefSeq longer	same
bmt2	ENSDART00000089616	3.86155	-1.81349	0.433272	XM_009298034.3	247.269	0.0157834	0.987193	TCONS_00080469	252.776	0.0684581	0.948156	RefSeq longer	same
BNC1	ENSDART00000163274	98.6756	-0.95888	0.168796	XM_009300994.2	59.9406	-1.49151	0.0766695	TCONS_00129363	100.753	-0.903781	0.194181	Ens95 longer	same
bnc2	ENSDART00000180184	883.973	-0.490989	0.409401	NM_001327750.1	691.565	-0.0885322	0.91556	TCONS_00001093	900.073	-0.444814	0.425832	Ens95 longer	same
bnip1a	ENSDART00000114169				XM_684156.8		0.753002	1	TCONS_00025732	17.3706	-1.19491	0.557703	RefSeq longer	V4 longer
bnip1b	ENSDART00000169977	190.174	0.474489	0.506374	XM_001333689.8	8.04935	-0.362365	1	TCONS_00064914	194.325	0.527737	0.424702	Ens95 longer	same
bnip2	ENSDART00000148914	209.492	1.5529	0.0488027	XM_009298160.3	1197.93	1.6741	0.000162097	TCONS_00079177	1227.13	1.72303	6.99366e-05	RefSeq longer	same
bnip3la	ENSDART00000035676	35.838	0.770327	0.635083	NM_001012242.1	35.5167	0.779477	0.601774	TCONS_00119954	1125.13	0.501761	0.518398	same	V4 longer
bnip3lb	ENSDART00000030205	693.798	0.982431	0.0593099	NM_205571.2	694.279	0.986152	0.048728	TCONS_00006497	710.002	1.03683	0.038149	same	same
bnip4	ENSDART00000029380	190.278	-0.491806	0.442133	NM_212693.2	189.972	-0.471263	0.424682	TCONS_00039694	193.78	-0.442918	0.476277	same	same
bnipl	ENSDART00000085143	10.6079	-1.4683	0.51012	XM_005158197.4	46.0698	-1.0214	0.27601	TCONS_00033227	124.242	-0.486965	0.588566	RefSeq longer	V4 longer
boc	ENSDART00000111025	1028.36	-1.87848	2.27329e-06	NM_001005393.1	327.735	-1.6813	0.00171186	TCONS_00076579	1054.72	-1.82418	3.19872e-06	Ens95 longer	V4 longer
bod1	ENSDART00000161175	312.984	0.204718	0.833795	NM_001076712.1	311.747	0.20065	0.812679	TCONS_00062321	319.901	0.26161	0.768242	same	same
boka	ENSDART00000168277	56.7475	-0.789191	0.360667	XM_005165921.4	54.8126	-0.834555	0.290615	TCONS_00106294	58.1197	-0.73308	0.400836	Ens95 longer	same
bokb	ENSDART00000144890	13.5896	-1.26398	0.62701	NM_201185.1	2.57951	-3.52621	0.0240911	TCONS_00050419	13.6063	-1.23508	0.656733	same	same
bola1	ENSDART00000058385	242.996	0.563126	0.550148	NM_001003557.1	242.994	0.585853	0.493033	TCONS_00033524	248.196	0.619836	0.485605	same	same
BOLA2	ENSDART00000186053	461.194	1.39482	0.0455779	NM_001243171.1	447.619	1.49985	0.0334215	TCONS_00116534	468.935	1.44323	0.0346193	Ens95 longer	same
bola3	ENSDART00000161609	201.056	0.473896	0.653683	NM_001003525.3	199.765	0.503769	0.598138	TCONS_00113547	204.24	0.523363	0.59988	Ens95 longer	same
bop1	ENSDART00000137020	431.915	0.727745	0.24957	NM_001077735.1	403.718	0.755549	0.215742	TCONS_00047232	441.588	0.777669	0.20048	Ens95 longer	same
bora	ENSDART00000177900	74.7262	-0.449337	0.68209	XM_005159947.2	70.5649	-0.4176	0.683927	TCONS_00001235	76.1308	-0.410385	0.721114	Ens95 longer	same
borcs5	ENSDART00000093358	35.3809	-1.00432	0.546122	NM_001007052.2	45.0506	-0.945813	0.498483	TCONS_00078450	36.0837	-0.951651	0.587591	Ens95 longer	same
borcs7	ENSDART00000077383	91.9862	0.248076	0.871803	NM_001039988.1	91.9726	0.247589	0.851829	TCONS_00019866	93.4055	0.292152	0.843309	same	same
borcs8	ENSDART00000152024	61.3098	-0.248703	0.884506	XM_005170457.4	56.1494	-0.13252	0.940363	TCONS_00066512	120.439	-0.449022	0.639456	Ens95 longer	V4 longer
bpgm	ENSDART00000104304	264.575	0.399653	0.644109	NM_001002630.1	262.312	0.396487	0.608425	TCONS_00078606	268.823	0.444148	0.576024	same	same
bphl	ENSDART00000164745	130.85	0.211884	0.843298	XM_021470901.1	84.4094	0.166287	0.885826	TCONS_00128944	133.302	0.26179	0.798467	Ens95 longer	same
bpifcl	ENSDART00000164012	83.4809	1.27346	0.549518	XM_001342726.5	83.8612	1.28027	0.516075	TCONS_00122433	86.8521	1.35595	0.529833	same	same
bpnt1	ENSDART00000064144	186.373	0.505363	0.534505	XM_021468396.1	185.413	0.559691	0.456662	TCONS_00055727	190.193	0.557401	0.458555	same	same
bptf	ENSDART00000154200	1814.78	0.0954556	0.926072	XM_009299420.3	1822.26	0.0878656	0.916818	ENSDART00000154200	1869.15	0.136103	0.883363	Ens95 longer	same
brap	ENSDART00000109148	201.346	0.75706	0.253706	XM_021479154.1	215.844	0.748132	0.210069	TCONS_00005845	380.291	0.799196	0.118288	RefSeq longer	V4 longer
brat1	ENSDART00000090689	189.895	-0.105867	0.941202	NM_001040305.1	190.282	-0.107184	0.927468	TCONS_00003387	195.358	-0.0735023	0.961279	same	V4 longer
brca2	ENSDART00000111472	362.335	0.541436	0.427089	NM_001110394.2	362.027	0.540377	0.382226	TCONS_00028319	368.977	0.584723	0.35004	same	same
brd1a	ENSDART00000013083	172.252	-0.651977	0.427186	XM_021475279.1	172.313	-0.642951	0.402257	TCONS_00088989	177.037	-0.593446	0.482402	Ens95 longer	same
brd1b	ENSDART00000174568	1400.96	0.312095	0.605262	XM_005163142.4	1351.41	0.347866	0.505423	TCONS_00078989	1432.66	0.353837	0.493585	Ens95 longer	same
brd2a	ENSDART00000035967	8526.84	1.02623	0.13326	NM_001270571.1	6922.61	1.11736	0.140825	TCONS_00045357	8719.09	1.07147	0.107105	same	same
brd3b	ENSDART00000168030	3537.38	-0.075533	0.924366	XM_009301940.3	3521.14	-0.0765376	0.904258	TCONS_00104681	3619.67	-0.0298218	0.970165	Ens95 longer	same
brd4	ENSDART00000115117	3049.94	0.642538	0.212884	NM_001111281.1	1645.6	0.72555	0.127065	TCONS_00083704	4196.61	0.579972	0.19146	Ens95 longer	V4 longer
brd7	ENSDART00000143300	861.488	0.408638	0.459972	NM_213366.2	863.157	0.413647	0.40067	TCONS_00112485	879.203	0.460581	0.33432	same	same
brd8	ENSDART00000028623	761.883	-0.01623	0.987583	NM_212777.1	777.74	-0.0127784	0.986799	TCONS_00023276	793.96	0.0425452	0.959598	same	same
brd9	ENSDART00000009256	295.984	0.360138	0.708223	XM_005170122.4	295.948	0.357939	0.674596	TCONS_00036483	301.255	0.406207	0.650269	same	same
brdt	ENSDART00000163965	6256.1	0.975338	0.182954	NM_001305664.1	6096.12	0.996851	0.147016	TCONS_00108945	6805.83	0.980175	0.1757	same	same
brf1a	ENSDART00000033848	112.609	-0.0452649	0.974398	NM_199898.1	107.474	0.189102	0.856715	TCONS_00020236	115.026	0.0076726	0.995034	Ens95 longer	same
brf1b	ENSDART00000181195	221.489	-0.0250775	0.987239	NM_199889.1	180.984	0.0376405	0.974016	TCONS_00056085	227.643	0.0376643	0.978834	Ens95 longer	same
brf2	ENSDART00000160174	128.495	1.46702	0.0480167	XM_009305649.3	120.763	1.65274	0.0298932	TCONS_00009779	126.415	1.60017	0.0346559	Ens95 longer	same
bri3	ENSDART00000126417	1264.11	1.79416	4.71317e-06	NM_001200039.1	1264.42	1.79076	2.89934e-06	TCONS_00084011	1289.52	1.84418	6.31102e-07	same	same
bri3bp	ENSDART00000014434	29.6534	-0.166527	0.929561	NM_001089335.1	29.6554	-0.166372	0.915434	TCONS_00102377	1751.21	0.252972	0.757738	same	V4 longer
bricd5	ENSDART00000078172	75.8042	-0.783265	0.863103	NM_001327891.1	37.9173	-0.654915	0.788794	TCONS_00017269	78.1924	-0.7327	0.872644	Ens95 longer	same
brinp3a.1	ENSDART00000191159	37.6125	-3.10633	0.00129544	NM_001114437.1	37.9486	-3.09077	0.00147617	TCONS_00109407	38.9656	-3.03001	0.00267526	Ens95 longer	same
brinp3a.2	ENSDART00000086627	25.4694	-2.45991	0.00028671	XM_001341533.5	22.5806	-1.77963	0.0304801	TCONS_00109419	25.8293	-2.40807	0.00050569	Ens95 longer	same
brinp3b	ENSDART00000112227	27.9982	-1.97523	0.203828	XM_002660710.5	21.8783	-2.13609	0.146804	TCONS_00049780	28.6869	-1.95901	0.232525	Ens95 longer	same
brip1	ENSDART00000187390	163.373	-0.305373	0.760248	XM_021466284.1	131.443	-0.347622	0.686109	TCONS_00030422	166.843	-0.260438	0.800479	Ens95 longer	same
brk1	ENSDART00000184229	1381.75	-0.0339011	0.983466	XM_005172903.4	1366.49	-0.0357474	0.977097	ENSDART00000184229	1411.3	0.0231327	0.98783	Ens95 longer	same
brms1	ENSDART00000121545	338.759	-0.198155	0.79163	NM_200097.1	224.103	-0.0720409	0.933921	TCONS_00113450	349.583	-0.151229	0.83784	Ens95 longer	V4 longer
brms1la	ENSDART00000003418	606.794	-0.426387	0.537526	NM_001030102.2	594.112	-0.388479	0.542565	TCONS_00039347	628.347	-0.361925	0.614044	same	same
brms1lb	ENSDART00000027582	85.8166	-0.604771	0.534389	XM_003200688.5	12.5835	-0.904376	0.58431	TCONS_00058446	86.9067	-0.595588	0.531473	Ens95 longer	same
brpf3a	ENSDART00000171935	123.047	0.607685	0.577971	XM_021479844.1	129.52	0.670237	0.499113	TCONS_00013507	407.232	-0.016889	0.989422	RefSeq longer	V4 longer
brpf3b	ENSDART00000140717	89.3673	0.235487	0.870696	XM_005166736.4	88.3884	0.213821	0.865648	TCONS_00117473	536.225	0.668204	0.295816	same	same
brsk2b	ENSDART00000174161	89.0378	-1.60826	0.0930197	XM_009303428.2	91.6554	-1.57524	0.0969407	TCONS_00116074	93.6941	-1.52131	0.131593	same	same
brwd1	ENSDART00000154812	645.061	-0.254751	0.76422	XM_001920406.7	659.814	-0.228149	0.756832	TCONS_00029359	675.487	-0.171128	0.845531	same	same
bscl2l	ENSDART00000128638	9.68309	-3.03971	0.0312509	XM_005173085.4	9.6772	-3.0348	0.0315563	TCONS_00023209	9.69639	-3.01083	0.0432106	same	same
bsdc1	ENSDART00000005195	960.915	0.472527	0.43339	NM_001004108.2	959.925	0.469121	0.38851	TCONS_00020573	978.423	0.520282	0.323985	same	same
bsg	ENSDART00000161598	6847.25	1.19981	0.0175835	NM_001312882.1	6842.91	1.20025	0.0141029	TCONS_00066570	6978.48	1.25433	0.00737015	same	same
bsk146	ENSDART00000158355	2.2635	-2.58545	0.287695	XM_009306356.3	3.55681	-2.42238	1	TCONS_00016454	143.259	-1.31093	0.05524	Ens95 longer	same
bsnd	ENSDART00000122298	6.73781	-0.0775651	0.99084	NM_001305623.1	6.744	-0.0755087	1	TCONS_00055696	38.4212	0.499662	0.770158	same	V4 longer
bsx	ENSDART00000099983	4.83209	-2.82194	0.124144	NM_214727.1	3.86346	-3.03224	0.0769927	TCONS_00009274	13.5759	-1.95553	0.162652	Ens95 longer	V4 longer
btaf1	ENSDART00000134533	690.096	0.221994	0.748256	XM_005169532.4	683.351	0.192982	0.747004	TCONS_00022609	709.799	0.243412	0.685544	RefSeq longer	V4 longer
btbd10a	ENSDART00000151853	631.624	-0.284536	0.735909	NM_001347897.1	658.412	-0.27862	0.71557	TCONS_00078443	675.785	-0.224806	0.800157	RefSeq longer	same
btbd10b	ENSDART00000154961	3322.65	1.82821	6.41854e-06	XM_682338.8	3318.66	1.82861	3.3968e-06	TCONS_00116641	3380.59	1.87431	7.97588e-07	same	same
btbd11a	ENSDART00000092250	227.753	-0.123908	0.900961	XM_005164650.4	342.94	-0.169979	0.829227	TCONS_00093596	350.514	-0.11757	0.902288	RefSeq longer	same
btbd16	ENSDART00000149713	1.93607	-1.93815	0.656336	XM_009306531.3	1.93457	-1.93856	1	TCONS_00017030	1.93875	-1.87402	1	same	same
btbd17a	ENSDART00000168694	148.207	0.527855	0.745874	XM_686626.5	29.6829	0.412704	0.824512	TCONS_00015997	152.969	0.599294	0.709766	Ens95 longer	same
btbd2a	ENSDART00000085913	405.973	-1.02256	0.0633489	XM_021469350.1	406.05	-1.02297	0.0530388	TCONS_00068758	415.297	-0.96479	0.0729713	same	same
btbd3a	ENSDART00000014970	66.5624	1.51639	0.279811	XM_005168206.3	634.46	0.491349	0.376965	TCONS_00002153	667.103	0.587829	0.26075	RefSeq longer	V4 longer
btbd6a	ENSDART00000103628	334.532	-0.796038	0.314216	NM_001114925.1	347.853	-0.73801	0.283987	TCONS_00022209	356.082	-0.68495	0.359641	same	same
btbd7	ENSDART00000020710	60.7929	-0.213136	0.909582	XM_005160586.3	802.596	0.692441	0.21575	TCONS_00058950	1424.37	0.561014	0.219309	RefSeq longer	V4 longer
btbd9	ENSDART00000099990	176.874	0.280701	0.784507	NM_001002198.1	176.928	0.281319	0.754155	TCONS_00022701	352.578	0.451084	0.501443	same	V4 longer
btd	ENSDART00000166669	29.3176	-1.43125	0.366989	NM_001045844.1	29.3098	-1.28284	0.416261	TCONS_00045124	29.6841	-1.3855	0.405642	Ens95 longer	same
btf3	ENSDART00000051295	21784.8	1.01092	0.0691481	XM_005171872.3	21801.1	1.01287	0.0552324	TCONS_00103456	22191.8	1.05477	0.0459415	same	same
btf3l4	ENSDART00000162074	813.111	0.0918523	0.936908	NM_200694.1	809.594	0.0930026	0.919886	ENSDART00000162074	828.154	0.1406	0.890564	same	same
btg1	ENSDART00000033188	32795.6	1.4954	0.0038556	NM_200020.1	20177.6	1.69187	0.00212057	TCONS_00093929	33403.8	1.5365	0.00236623	Ens95 longer	same
btg2	ENSDART00000019155	53393.9	1.98984	0.0568743	NM_130922.2	53175.9	1.98603	0.0510342	TCONS_00065175	54227.5	2.02315	0.0516555	Ens95 longer	same
btg4	ENSDART00000050949	6.45164	1.51184	0.713185	NM_198121.2	6.45451	1.51265	1	TCONS_00101077	6.78255	1.58259	1	same	same
btk	ENSDART00000148737	139.449	1.34763	0.131568	XM_021481245.1	103.074	1.27683	0.217051	TCONS_00026508	143.213	1.40049	0.114329	Ens95 longer	V4 longer
btr16	ENSDART00000147632	158.803	0.122906	0.93781	XM_003200029.5	15.7777	-0.912499	0.69502	TCONS_00029885	19.3735	-0.586124	0.743448	RefSeq longer	same
btr05	ENSDART00000171008	3.882	-2.73651	0.180966	XM_021477725.1	3.23871	-1.99585	1	ENSDART00000171008	3.88681	-2.75359	0.190506	Ens95 longer	same
btr06	ENSDART00000173946	6.43572	-1.27109	0.634037	XM_021477376.1	12.5492	-0.245891	1	ENSDART00000173946	12.5676	-0.365222	0.908887	Ens95 longer	same
btr07	ENSDART00000173647	6.43893	-0.208114	0.95909	XM_017356980.2	0.971613	-2.94038	1	rna23953	0.972717	-2.80789	1	RefSeq longer	same
btr09	ENSDART00000077047	41.9275	0.699187	0.684971	XM_021477379.1	49.3308	0.302131	0.839508	TCONS_00111700	50.7012	0.362933	0.828363	same	same
[truncated: 15,211 more rows]

## Sheet: 3 pdgfrb-pos exp
V4_3Abbrev	EnsdartID	Ens95avg PdgfrbPos	Ens95 Pdgfrb Pos LgFC	Ens95 Pdgfrb padj	RefSeqID	RefSeq Avg PdgfrbPos	RefSeq Pdgfrb LgFC	RefSeq Pdgfrb padj	V4tconsID	V4_3 Avg PdgfrbPos	V4 PdgfrbPos LgFC	V4 Pdgfrb padj	Ens95 vs RefSeq	V4 vs Ens95/RefSeq
[truncated: 16,558 more rows]

[truncated: 1 more sheets: 4 Nr2f2 expression]
