# Supplementary material for: An improved zebrafish transcriptome annotation for sensitive and comprehensive detection of cell type-specific genes
Source: eLife. 2020 Aug 24;9:e55792. doi: 10.7554/eLife.55792 (PMC7486121; doi:10.7554/eLife.55792)
Supplement: Figure 2—source data 3. — Output from DESeq2 analysis comparing Nr2f2pos and Nr2f2neg RNA-seq from gene expression levels quantified using RSEM with Ens95 (worksheet 1) or RefSeq (worksheet 2). Median ratio normalized expression values are shown for each sample, along with adjusted p-value, p-value, log2 fold change, fold change, and log10 adjusted p-value. Intersection of genesets identified as significantly enriched in Nr2f2pos cells using Ens95 or RefSeq (worksheet 3). [file elife-55792-fig2-data3.xlsx]

## Sheet: title
	Figure 2 - source data 3
	RNA-seq analysis of Nr2f2pos and Nr2f2neg cells
	worksheet 1 - DESeq2 output quantified using Ens95
	worksheet 2 - DESeq2 output quantified using RefSeq
	worksheet 3 - Intersection of DESeq2 output from RefSeq and Ens95 on genes commonly annotated using NCBI ID

## Sheet: 1 Ens95
ID	Ensdarg95	NCBI Gene ID	Nr2f2_y1_WT1	Nr2f2_y1_WT2	Nr2f2_y1_WT3	y1_WT1	y1_WT2	y1_WT3	log2 Fold Change	padj
a1cf	ENSDARG00000002968	562916	19.807	4.94553	4.95455	0.987234	1.97423	0	-3.32562	0.178137
a2ml	ENSDARG00000056314	100006972	0	0.989105	9.9091	11.8468	0	1.98101	0.343639	0.958583
aaas	ENSDARG00000102274	378454	219.857	127.595	141.7	184.613	172.745	174.329	0.120304	0.894532
aacs	ENSDARG00000012468	393984	49.5174	62.3136	63.4183	74.0425	72.0593	82.2118	0.381586	0.641778
aadac	ENSDARG00000063621	100148912	3.96139	21.7603	21.8	61.2085	67.1237	61.4112	1.99737	0.0145775
aadat	ENSDARG00000011410	557979	21.7877	69.2374	53.5092	18.7574	26.6521	49.5252	-0.606528	0.675166
aagab	ENSDARG00000041170	436696	90.1217	93.965	116.927	186.587	102.66	83.2023	0.307262	0.752484
aak1a	ENSDARG00000011855	568999	233.722	161.224	123.864	76.017	113.518	66.3637	-1.01959	0.0418038
aak1b	ENSDARG00000077686	100534954	511.02	624.125	607.428	415.626	556.732	542.796	-0.201766	0.657184
aamdc	ENSDARG00000103957	553802	8.91314	4.94553	13.8727	13.8213	8.88402	2.97151	-0.110827	0.974577
aamp	ENSDARG00000045019	405874	190.147	154.3	219.982	282.349	235.92	399.173	0.700808	0.0833672
aanat2	ENSDARG00000079802	30685	11.8842	1.97821	31.7091	8.88511	13.8196	11.886	-0.397671	0.898561
aar2	ENSDARG00000018658	431768	86.1603	75.172	73.3274	152.034	99.6985	119.851	0.663122	0.202966
aars	ENSDARG00000069142	324940	1700.43	1071.2	1402.14	2150.2	1412.56	1604.62	0.308085	0.483997
aars2	ENSDARG00000107385	100536819	130.726	148.366	138.727	145.123	163.861	185.224	0.242208	0.694685
aarsd1	ENSDARG00000015747	445178	42.585	62.3136	35.6728	50.3489	47.3815	42.5916	-0.00257942	0.99967
aasdh	ENSDARG00000022730	570338	36.6429	50.4444	49.5455	47.3872	83.9047	55.4682	0.4509	0.656627
aasdhppt	ENSDARG00000037501	619247	17.8263	5.93463	17.8364	12.834	13.8196	8.91453	-0.225769	0.932704
aass	ENSDARG00000051816	556229	247.587	249.255	199.173	305.055	352.4	273.379	0.419414	0.268519
aatf	ENSDARG00000025467	559477	103.987	72.2047	128.818	164.868	135.235	154.519	0.575841	0.293189
aatka	ENSDARG00000078222	100004850	916.072	746.774	764.983	591.353	486.647	546.758	-0.579442	0.00986837
aatkb	ENSDARG00000104442	555739	5.94209	46.4879	52.5183	0	15.7938	32.6866	-1.11432	0.671974
abat	ENSDARG00000006031	378968	682.35	750.731	737.237	323.813	386.949	595.292	-0.732725	0.0223627
abca12	ENSDARG00000074749		626.891	1567.73	639.137	206.332	533.041	441.764	-1.26254	0.200917
abca1a	ENSDARG00000074635	558924	3711.83	3440.11	3941.84	3038.71	3484.51	3159.71	-0.196233	0.429252
abca1b	ENSDARG00000079009	100136868	1621.2	1532.12	1279.27	1140.26	1131.23	934.045	-0.467578	0.0399674
abca2	ENSDARG00000013500	100006090	51.4981	88.0304	86.2092	473.872	346.477	257.531	2.25549	5.09704e-10
abca3b	ENSDARG00000100524	564344	500.126	705.232	721.383	374.162	537.977	498.223	-0.450103	0.221573
abca4a	ENSDARG00000057169	798993	23.7684	18.793	47.5637	18.7574	28.6263	26.7436	-0.281891	0.880813
abca4b	ENSDARG00000062661	555506	24.7587	55.3899	21.8	2.9617	4.93557	2.97151	-3.22948	0.00169206
abca5	ENSDARG00000074041	100151075	843.777	1032.63	895.783	626.894	804.498	760.707	-0.338719	0.241981
abcb10	ENSDARG00000061591	100003744	62.392	113.747	115.937	366.264	268.495	239.702	1.58206	2.03594e-05
abcb11a	ENSDARG00000011573	797269	17.8263	47.4771	48.5546	29.617	49.3557	63.3922	0.3223	0.843279
abcb4	ENSDARG00000010936	100136865	435.753	393.664	476.628	291.234	317.851	381.344	-0.399099	0.228375
abcb5	ENSDARG00000021787	798527	266.404	444.108	169.446	64.1702	277.379	158.481	-0.815424	0.337587
abcb6a	ENSDARG00000063297	564067	139.639	122.649	86.2092	98.7234	125.363	159.471	0.138246	0.894532
abcb6b	ENSDARG00000074254	100004801	165.388	183.974	121.882	130.315	155.964	161.452	-0.0738754	0.935959
abcb7	ENSDARG00000062795	566515	315.921	359.045	362.673	430.434	437.291	350.638	0.231659	0.585635
abcb8	ENSDARG00000056672	548340	50.5078	94.9541	70.3546	77.0043	94.7629	91.1263	0.284639	0.773622
abcb9	ENSDARG00000056200	570148	57.4402	58.3572	94.1365	2052.46	1548.78	1151.96	4.50094	2.81799e-48
abcc1	ENSDARG00000104719	100002010	495.174	506.422	404.291	347.506	383.987	358.562	-0.367084	0.237567
abcc10	ENSDARG00000077988	556709	408.024	428.283	395.373	385.021	372.142	365.496	-0.133707	0.768225
abcc12	ENSDARG00000013050	568482	47.5367	28.6841	28.7364	49.3617	15.7938	24.7626	-0.223078	0.906226
abcc13	ENSDARG00000062519	559093	46.5464	62.3136	53.5092	416.613	306.992	250.597	2.58494	3.36754e-15
abcc2	ENSDARG00000014031	393561	257.491	171.115	305.2	101.685	107.595	137.68	-1.08065	0.00483994
abcc3	ENSDARG00000096662	323301	2118.36	1833.8	1861.92	1731.61	1849.85	1581.83	-0.171252	0.573539
abcc4	ENSDARG00000058953	368620	514.981	498.509	530.137	627.881	546.861	549.729	0.159839	0.68065
abcc5	ENSDARG00000061233	336147	1113.15	1512.34	1356.56	1169.87	1166.77	1013.28	-0.249378	0.447929
abcc6a	ENSDARG00000016750	566555	1.9807	20.7712	16.8455	16.783	18.7552	32.6866	0.784793	0.714
abcc6b.1	ENSDARG00000105403	110439293	10.8938	20.7712	15.8546	8.88511	2.96134	2.97151	-1.68102	0.31896
abcc6b.2	ENSDARG00000094901	100002917	157.465	148.366	173.409	19.7447	54.2913	70.3257	-1.73116	0.00135555
abcc8	ENSDARG00000051879	553281	0	6.92374	27.7455	7.89787	19.7423	7.92403	0.0368646	0.992287
abcc9	ENSDARG00000015985	561160	338.699	348.165	568.783	29.617	105.621	156.5	-2.10575	0.000151163
abcd1	ENSDARG00000074876	566367	266.404	244.309	272.5	211.268	269.482	225.835	-0.148527	0.801136
abcd2	ENSDARG00000059409	100537809	71.3051	94.9541	55.491	77.0043	110.557	61.4112	0.167068	0.893754
ABCD2oneOfMany	ENSDARG00000099178		65.363	31.6514	48.5546	53.3106	30.6005	44.5726	-0.180101	0.905909
abcd3a	ENSDARG00000104085	406803	230.751	192.876	197.191	239.898	181.629	174.329	-0.0591827	0.942495
abcd3b	ENSDARG00000002947	100170781	23.7684	46.4879	24.7728	77.0043	85.8789	54.4777	1.19362	0.0833599
abcd4	ENSDARG00000061770	767748	35.6525	101.878	83.2365	75.0298	98.7114	87.1643	0.240985	0.853472
abce1	ENSDARG00000007216	406324	919.043	670.613	574.728	1340.66	921.964	1023.19	0.602298	0.060661
abcf1	ENSDARG00000031795	406467	696.215	467.847	391.41	863.83	689.005	548.739	0.434129	0.353709
abcf2a	ENSDARG00000038785	336770	409.014	357.067	317.091	650.587	573.513	479.404	0.653255	0.0142075
abcf2b	ENSDARG00000052331	100000576	13.8649	4.94553	13.8727	1.97447	2.96134	1.98101	-2.24022	0.261207
abcf3	ENSDARG00000089705	100331227	38.6236	42.5315	22.7909	79.966	41.4588	21.7911	0.462403	0.766872
abcg2a	ENSDARG00000100075	735312	816.047	567.746	850.201	669.345	537.977	500.204	-0.387701	0.304706
abcg2c	ENSDARG00000058574	569858	235.703	235.407	287.364	263.591	260.598	250.597	0.0307157	0.965343
abcg2d	ENSDARG00000016818	735310	8.91314	12.8584	13.8727	6.91064	15.7938	27.7341	0.500725	0.830996
abch1	ENSDARG00000071341	558667	11.8842	54.4008	38.6455	17.7702	35.5361	19.8101	-0.521154	0.774015
abhd10a	ENSDARG00000076435	568517	88.141	90.9977	103.055	108.596	83.9047	134.708	0.213486	0.811625
abhd11	ENSDARG00000069501	446169	50.5078	25.7167	42.6091	41.4638	35.5361	27.7341	-0.182129	0.908185
abhd12	ENSDARG00000071004	767657	355.535	304.644	308.173	300.119	275.405	264.464	-0.20515	0.65673
abhd13	ENSDARG00000059209	561333	79.2279	70.2265	66.391	69.1064	65.1495	102.022	0.13042	0.908185
abhd14a	ENSDARG00000058367	404598	72.2954	50.4444	52.5183	69.1064	56.2655	44.5726	-0.0443584	0.974613
abhd14b	ENSDARG00000100531	393338	53.4788	48.4662	30.7182	45.4128	25.665	20.8006	-0.529909	0.678411
abhd15a	ENSDARG00000078768	560644	26.7394	42.5315	22.7909	58.2468	67.1237	47.5442	0.909359	0.254762
abhd16a	ENSDARG00000078929	564613	284.23	263.102	243.764	323.813	302.057	304.085	0.233308	0.586733
abhd17aa	ENSDARG00000091433	322121	206.983	142.431	118.909	198.434	168.796	126.784	0.0770805	0.941161
abhd17ab	ENSDARG00000043084	100003419	242.635	198.81	205.118	170.791	106.608	81.2213	-0.850275	0.0670757
abhd17b	ENSDARG00000035571	437017	225.799	275.96	323.037	150.06	180.642	187.205	-0.67136	0.0524085
abhd17c	ENSDARG00000058452	393126	323.844	335.307	384.473	179.677	308.967	304.085	-0.396719	0.42356
abhd18	ENSDARG00000101961	503769	121.813	109.791	129.809	114.519	104.634	152.538	0.0404161	0.967733
abhd2a	ENSDARG00000025797	393888	107.948	140.453	120.891	208.306	178.668	137.68	0.506626	0.314633
abhd2b	ENSDARG00000045804	559290	0.990348	3.95642	0.99091	17.7702	5.92268	7.92403	2.41248	0.272856
abhd3	ENSDARG00000018809	447830	16.8359	22.7494	17.8364	51.3362	35.5361	34.6676	1.08176	0.219881
abhd4	ENSDARG00000102887	550276	10.8938	20.7712	14.8637	19.7447	26.6521	6.93352	0.196934	0.93824
abhd6a	ENSDARG00000060756	799085	43.5753	31.6514	34.6819	54.2979	80.9433	33.6771	0.620103	0.555746
abhd8b	ENSDARG00000076620	101883400	5.94209	41.5424	41.6182	22.7064	68.1109	45.5632	0.614085	0.739272
abi1a	ENSDARG00000010155	393711	986.387	901.075	942.356	742.4	707.761	734.953	-0.373	0.0646316
abi1b	ENSDARG00000062991	767738	162.417	212.658	294.3	267.54	266.521	304.085	0.324386	0.57714
abi2a	ENSDARG00000058207	767646	231.742	200.788	241.782	227.064	227.036	230.787	0.0224596	0.975472
abi2b	ENSDARG00000014875	692331	848.729	744.796	742.192	623.932	745.271	726.039	-0.156752	0.687366
abi3a	ENSDARG00000060072	767807	2.97105	20.7712	17.8364	96.7489	75.0207	36.6486	2.32556	0.0100692
abi3b	ENSDARG00000063283	566059	3.96139	52.4226	43.6001	12.834	26.6521	60.4207	-0.00120331	0.99967
abi3bpa	ENSDARG00000062156	101884149	0	6.92374	0.99091	4.93617	11.8454	2.97151	1.31933	0.74527
abi3bpb	ENSDARG00000071095	100149890	779.404	1020.76	841.283	293.208	351.413	374.41	-1.37415	5.41446e-11
abl1	ENSDARG00000035187	100000720	1515.23	1594.44	1613.2	1623.01	1626.76	1673.95	0.0600842	0.872584
abl2	ENSDARG00000013841	570636	596.19	603.354	541.037	397.855	479.737	438.793	-0.40299	0.121267
ablim1a	ENSDARG00000060149	100003558	56.4499	35.6078	87.2001	316.902	309.954	177.3	2.16552	8.78804e-07
ablim1b	ENSDARG00000045064	541550	509.039	520.269	508.337	329.736	430.382	441.764	-0.355443	0.273698
ablim2	ENSDARG00000055223	568454	125.774	72.2047	52.5183	71.0808	106.608	80.2308	0.0421386	0.976259
ablim3	ENSDARG00000088168	566821	207.973	382.784	321.055	75.0298	90.8145	123.813	-1.65446	7.69894e-06
abr	ENSDARG00000095180	565190	109.929	116.714	107.018	194.485	122.402	110.936	0.35866	0.621113
abraa	ENSDARG00000038583	324520	13.8649	33.6296	17.8364	1.97447	10.8583	27.7341	-0.687692	0.781258
abrab	ENSDARG00000033854	445477	28.7201	68.2483	58.4637	24.6808	48.3686	58.4397	-0.241414	0.884185
abracl	ENSDARG00000042876	336650	102.006	106.823	101.073	338.621	216.178	148.575	1.18251	0.00629401
abraxas1	ENSDARG00000043339	449820	120.823	134.518	135.755	158.945	170.771	118.86	0.197871	0.790487
abraxas2	ENSDARG00000098907	406584	160.436	166.17	114.946	176.715	102.66	116.879	-0.156152	0.874187
abt1	ENSDARG00000043666	553568	93.0928	80.1175	59.4546	129.328	78.9691	140.651	0.584716	0.393679
abtb1	ENSDARG00000063354	100536189	157.465	190.897	199.173	161.906	118.454	158.481	-0.319275	0.581924
abtb2a	ENSDARG00000059751	559451	187.176	64.2918	78.2819	192.511	176.693	229.797	0.86119	0.184447
abtb2b	ENSDARG00000062000	100007078	486.261	529.171	616.346	418.587	538.964	465.537	-0.197414	0.659305
acaa1	ENSDARG00000004687	431754	52.4885	31.6514	42.6091	109.583	40.4717	28.7246	0.496279	0.731628
acaa2	ENSDARG00000038881	406325	323.844	314.535	281.419	327.762	301.07	229.797	-0.0992555	0.886079
acaca	ENSDARG00000078512	559403	333.747	366.958	293.309	463.013	388.923	361.534	0.287803	0.478262
acacb	ENSDARG00000061994	556236	1716.27	1703.24	1677.61	1739.51	1646.51	1887.9	0.0491838	0.90288
acad11	ENSDARG00000045411	393147	156.475	107.812	102.064	115.506	94.7629	110.936	-0.189735	0.832769
acad8	ENSDARG00000042658	394130	120.823	58.3572	123.864	89.8383	93.7758	98.0598	-0.105475	0.930328
acad9	ENSDARG00000055620	724002	399.11	359.045	292.319	464	376.09	381.344	0.217538	0.658652
acadl	ENSDARG00000088357	394156	95.0735	90.0086	68.3728	95.7617	104.634	58.4397	0.0303582	0.981993
acadm	ENSDARG00000038900	406283	394.159	290.797	321.055	348.494	307.98	231.778	-0.179573	0.77927
acads	ENSDARG00000030781	445288	69.3244	70.2265	44.591	65.1574	52.317	55.4682	-0.0905383	0.94519
acadsb	ENSDARG00000076780	110437777	575.392	496.531	356.728	492.63	466.905	431.859	-0.0381212	0.958531
acadvl	ENSDARG00000016687	573723	1172.57	897.118	915.601	927.013	1001.92	825.089	-0.116322	0.810023
acana	ENSDARG00000035891	497505	9.90348	25.7167	12.8818	330.723	195.449	214.939	3.93341	2.0757e-17
acanb	ENSDARG00000045799	559593	0	10.8802	28.7364	6.91064	4.93557	7.92403	-1.00278	0.765828
acap1	ENSDARG00000056346	561771	199.06	253.211	251.691	684.153	454.072	307.056	1.0378	0.00631465
acap2	ENSDARG00000060783	100124613	1013.13	719.08	912.628	694.025	705.786	665.618	-0.356726	0.225983
acap3a	ENSDARG00000075990	322991	237.684	319.481	317.091	139.2	218.152	232.768	-0.567075	0.201287
acap3b	ENSDARG00000099240	100009646	196.089	194.854	204.128	139.2	160.9	122.822	-0.492632	0.221757
acat1	ENSDARG00000045888	445290	222.828	203.756	181.337	245.821	182.616	208.996	0.0683902	0.92922
acat2	ENSDARG00000007127	30643	82.1989	48.4662	47.5637	107.609	65.1495	54.4777	0.350509	0.762147
acbd3	ENSDARG00000042623	406270	597.18	503.455	464.737	597.277	457.034	330.828	-0.176452	0.788286
acbd4	ENSDARG00000027070	406368	33.6718	46.4879	28.7364	68.1191	63.1753	31.6961	0.581873	0.59551
acbd5a	ENSDARG00000034883	553674	85.17	87.0413	105.037	91.8128	80.9433	71.3162	-0.183824	0.846193
acbd6	ENSDARG00000039456	324090	140.629	130.562	86.2092	123.404	91.8016	67.3542	-0.338945	0.700313
accs	ENSDARG00000052124	541510	256.5	208.701	280.428	259.643	275.405	299.132	0.161902	0.784572
acd	ENSDARG00000078055	794664	25.7491	60.3354	61.4364	64.1702	67.1237	99.0503	0.642823	0.493527
ace	ENSDARG00000079166	565980	302.056	261.124	346.819	130.315	166.822	184.234	-0.918739	0.00284117
acer1	ENSDARG00000010347	550266	11.8842	24.7276	0	1.97447	8.88402	0.990503	-1.62739	0.637668
acer2	ENSDARG00000077782	100331179	104.977	55.3899	69.3637	49.3617	37.5103	37.6391	-0.883627	0.205892
acer3	ENSDARG00000093366	555411	51.4981	61.3245	43.6001	69.1064	31.5876	36.6486	-0.187648	0.900185
ache	ENSDARG00000031796	114549	196.089	161.224	158.546	138.213	162.874	153.528	-0.182332	0.787631
acin1a	ENSDARG00000054290	368893	3239.43	3805.09	4082.55	3835.4	3810.26	4221.53	0.092903	0.81023
acin1b	ENSDARG00000026842	327495	2087.65	2233.4	2239.46	2199.56	2375	2444.56	0.0974779	0.764371
ACKR2	ENSDARG00000086314	101887081	53.4788	56.379	58.4637	12.834	5.92268	7.92403	-2.65728	7.39286e-05
ackr3a	ENSDARG00000062478	100000764	24.7587	55.3899	40.6273	60.2213	34.549	68.3447	0.433482	0.732863
ackr3b	ENSDARG00000058179	561050	1935.14	1981.18	1718.24	2055.42	2395.73	1996.85	0.194552	0.507754
ackr4a	ENSDARG00000078729	100003167	0	16.8148	11.8909	1.97447	7.89691	11.886	-0.399967	0.926898
ackr4b	ENSDARG00000040133	641390	36.6429	64.2918	63.4183	22.7064	32.5748	27.7341	-0.985355	0.216292
aclya	ENSDARG00000099079	436922	760.588	693.363	574.728	807.557	694.928	490.299	-0.0257388	0.973201
aclyb	ENSDARG00000055652	794259	36.6429	27.6949	32.7	16.783	34.549	35.6581	-0.157739	0.928943
aco1	ENSDARG00000026376	568448	367.419	425.315	406.273	252.732	308.967	232.768	-0.59376	0.0365075
aco2	ENSDARG00000007294	322670	2016.35	1987.11	1620.14	2044.56	2014.7	1622.44	0.0148345	0.978575
acod1	ENSDARG00000069844	795305	18.8166	4.94553	10.9	72.0681	36.5232	32.6866	2.02722	0.0303356
acot11a	ENSDARG00000058229	554842	37.6332	65.2809	38.6455	57.2596	62.1882	29.7151	0.0755202	0.964165
acot11b	ENSDARG00000042122	641574	116.861	78.1393	106.027	33.566	69.098	32.6866	-1.15311	0.063726
acot13	ENSDARG00000061728	564010	84.1796	38.5751	44.591	72.0681	39.4846	47.5442	-0.0728952	0.965098
acot14	ENSDARG00000089159	557184	102.996	127.595	168.455	165.855	133.26	208.006	0.345755	0.625498
acot15	ENSDARG00000045522	557032	87.1507	64.2918	87.2001	90.8255	86.866	81.2213	0.117652	0.909393
acot16	ENSDARG00000069292	402867	10.8938	0	0	1.97447	0	0	-2.4636	1
acot17	ENSDARG00000088524	572757	1.9807	14.8366	8.91819	2.9617	2.96134	13.867	-0.379286	0.920741
acot18	ENSDARG00000033413	556673	25.7491	28.6841	15.8546	18.7574	16.7809	23.7721	-0.24508	0.899143
acot20	ENSDARG00000042510	553440	40.6043	26.7058	13.8727	14.8085	16.7809	9.90503	-0.968177	0.496415
acot7	ENSDARG00000018653	447878	17.8263	8.90195	13.8727	54.2979	29.6134	18.8196	1.3394	0.240491
acot8	ENSDARG00000014138	450052	0.990348	2.96732	5.94546	12.834	8.88402	5.94302	1.48205	0.562816
acot9.1	ENSDARG00000058352	798073	293.143	202.767	201.155	230.026	206.307	164.424	-0.214482	0.757532
acot9.2	ENSDARG00000058390	798008	43.5753	44.5097	16.8455	33.566	25.665	7.92403	-0.643764	0.708106
acox1	ENSDARG00000014727	449662	293.143	252.222	264.573	364.289	252.701	181.262	-0.0209306	0.984203
acox3	ENSDARG00000038865	406421	87.1507	40.5533	46.5728	36.5277	32.5748	73.2972	-0.291518	0.849359
acoxl	ENSDARG00000020149	569104	121.813	143.42	79.2728	123.404	115.492	98.0598	-0.0319697	0.97689
acp1	ENSDARG00000076486	541489	118.842	87.0413	80.2637	129.328	76.0078	93.1073	0.0607099	0.959157
acp2	ENSDARG00000007244	503759	113.89	125.616	109	198.434	140.17	162.443	0.523753	0.261604
acp5a	ENSDARG00000019763	406801	1.9807	5.93463	4.95455	104.647	68.1109	72.3067	4.25099	1.77344e-10
acp5b	ENSDARG00000101456	436725	9.90348	6.92374	2.97273	0	7.89691	1.98101	-1.0031	0.80807
acp6	ENSDARG00000040064	558758	31.6912	44.5097	31.7091	30.6043	32.5748	24.7626	-0.295191	0.838488
acp7	ENSDARG00000102421	571830	71.3051	57.3681	32.7	43.4383	22.7036	27.7341	-0.78156	0.439822
acsbg2	ENSDARG00000004094	335159	1949.01	1587.51	1602.3	1042.52	931.835	870.652	-0.852997	1.94676e-06
acsf2	ENSDARG00000061201	751707	674.427	855.576	723.365	823.353	884.454	711.181	0.102326	0.839042
ACSF3	ENSDARG00000059503	562292	48.5271	39.5642	54.5001	71.0808	45.4072	55.4682	0.270185	0.817523
acsl1a	ENSDARG00000030514	555308	258.481	327.394	293.309	285.311	309.954	291.208	0.011905	0.987333
acsl1b	ENSDARG00000003854	445175	598.17	737.873	413.21	705.872	623.856	625.008	0.160227	0.796092
acsl2	ENSDARG00000078399	100332846	378.313	310.579	370.6	434.383	428.407	743.868	0.60067	0.124394
acsl3a	ENSDARG00000032079	567157	53.4788	52.4226	33.691	25.6681	14.8067	11.886	-1.41456	0.0916591
acsl3b	ENSDARG00000014674	559656	1729.15	1370.9	1295.12	1524.29	1554.7	1245.06	-0.0235256	0.967979
acsl4a	ENSDARG00000004078	393622	253.529	275.96	240.791	388.97	388.923	397.192	0.609297	0.011932
acsl4b	ENSDARG00000010752	334561	106.958	120.671	86.2092	287.285	308.967	187.205	1.31984	0.000164113
acsl5	ENSDARG00000075931	447860	0	0	2.97273	9.87234	0.987114	0	1.86941	1
acsm3	ENSDARG00000004880	100002035	280.269	272.004	219.982	204.357	216.178	210.977	-0.290274	0.526241
acss1	ENSDARG00000044142	541435	91.1121	116.714	165.482	133.277	192.487	172.348	0.41611	0.538112
acss2	ENSDARG00000037781	436914	877.449	787.328	778.856	1155.06	1042.39	1190.58	0.47142	0.0146256
acss2l	ENSDARG00000069029	560020	5.94209	2.96732	14.8637	1.97447	0.987114	38.6296	0.806844	0.833265
acss3	ENSDARG00000032218	566019	57.4402	99.8996	87.2001	106.621	178.668	116.879	0.717733	0.235003
acta1a	ENSDARG00000036371	550445	545.682	389.707	203.137	119.455	281.327	196.12	-0.931601	0.109857
acta1b	ENSDARG00000055618	407658	3238.44	2041.51	913.619	564.698	1323.72	1031.11	-1.08503	0.317975
actb1	ENSDARG00000037746	57934	37006.4	33039.1	28405.4	55612.9	38012.8	31872.4	0.35019	0.346171
actb2	ENSDARG00000037870	57935	43586.2	36153.8	43916.2	73023.7	53333.8	52576.9	0.533097	0.0159708
actc1a	ENSDARG00000042535	408256	1155.74	740.84	456.81	253.719	471.84	450.679	-1.00057	0.0272277
actc1b	ENSDARG00000099197	58114	11869.3	7160.13	3817.98	2082.08	5347.2	4243.32	-0.968906	0.354065
actc1c	ENSDARG00000079111	415164	0	12.8584	21.8	0	1.97423	7.92403	-1.80828	0.639267
actl6a	ENSDARG00000070828	192313	496.165	342.23	304.209	500.528	378.065	361.534	0.118172	0.877647
actn1	ENSDARG00000007219	560400	2836.36	3797.18	2927.15	3714.96	3705.63	3128.01	0.141866	0.728009
actn2b	ENSDARG00000071090	641575	79.2279	61.3245	40.6273	102.672	61.2011	79.2403	0.424199	0.663651
actn3a	ENSDARG00000013755	58037	1572.67	1039.55	562.837	300.119	671.237	528.929	-1.08155	0.0239679
actn3b	ENSDARG00000001431	323320	961.628	847.663	348.8	176.715	540.938	450.679	-0.885307	0.48092
actn4	ENSDARG00000099786	322221	9221.13	9758.51	9664.35	11495.4	10043.9	9449.4	0.113508	0.716815
actr1	ENSDARG00000011611	406681	1061.65	686.439	620.31	954.655	693.941	577.463	-0.0894113	0.9123
actr10	ENSDARG00000038432	393139	170.34	163.202	148.637	164.868	172.745	194.139	0.141159	0.838716
actr2a	ENSDARG00000052438	406820	1122.06	940.639	832.365	2077.14	1284.24	1052.91	0.608587	0.101299
actr2b	ENSDARG00000070076	554861	269.375	349.154	291.328	816.443	550.81	435.821	0.986756	0.00224179
actr3	ENSDARG00000091138	406250	629.862	640.94	583.646	1221.21	931.835	680.476	0.611617	0.0518749
actr3b	ENSDARG00000008790	100038776	0	2.96732	2.97273	0.987234	0	9.90503	0.874482	1
actr5	ENSDARG00000098235	406809	128.745	83.0848	104.046	93.7872	110.557	109.946	-0.00725462	0.994702
actr6	ENSDARG00000021370	324822	121.813	84.0739	57.4728	113.532	107.595	104.993	0.308369	0.736065
actr8	ENSDARG00000103610	326866	121.813	75.172	103.055	88.8511	156.951	123.813	0.30089	0.732245
acvr1ba	ENSDARG00000018968	30183	805.153	917.89	788.765	1066.21	1038.44	1113.33	0.357421	0.0981056
acvr1bb	ENSDARG00000052142	559222	295.124	297.721	283.4	205.345	312.915	371.439	0.0219527	0.980345
acvr1l	ENSDARG00000014986	30615	974.503	994.051	1055.32	891.472	1023.64	978.617	-0.0634689	0.886744
acvr2aa	ENSDARG00000011188	553359	1954.95	1709.17	1766.79	1057.33	1372.09	1531.32	-0.455435	0.0684368
acvr2ab	ENSDARG00000104700	100331014	311.96	336.296	386.455	314.928	346.477	406.106	0.0450071	0.947094
acvr2ba	ENSDARG00000044422	30457	1239.92	1103.84	1349.62	987.234	1210.2	1337.18	-0.0633927	0.905909
acvr2bb	ENSDARG00000103108	100331938	1186.44	1067.24	1111.8	913.191	931.835	1032.1	-0.22619	0.395504
acvrl1	ENSDARG00000018179	266753	929.937	808.099	758.046	740.425	811.408	841.928	-0.060393	0.904084
acy1	ENSDARG00000111129	100001620	67.3437	90.0086	64.4092	96.7489	93.7758	49.5252	0.114374	0.928943
acy3.1	ENSDARG00000093003	791456	2.97105	2.96732	0.99091	42.4511	7.89691	11.886	3.16684	0.0439752
acy3.2	ENSDARG00000005525	436619	111.909	74.1829	52.5183	127.353	83.9047	47.5442	0.117242	0.93824
acyp1	ENSDARG00000060126	571263	19.807	19.7821	9.9091	10.8596	15.7938	6.93352	-0.559384	0.793028
ada	ENSDARG00000003113	436919	0	19.7821	33.691	68.1191	44.4201	27.7341	1.3914	0.455599
ada2a	ENSDARG00000051746	373884	134.687	132.54	100.082	122.417	111.544	160.462	0.102691	0.913743
ada2b	ENSDARG00000015623	559295	0	12.8584	0	8.88511	14.8067	0.990503	0.9407	0.860142
adal	ENSDARG00000012986	619263	14.8552	2.96732	9.9091	19.7447	6.9098	22.7816	0.834038	0.714749
adam10a	ENSDARG00000053468	566044	3419.67	3449.01	3187.76	2848.17	2726.41	2350.46	-0.343625	0.0758756
adam10b	ENSDARG00000015502	393392	919.043	845.685	1105.86	785.838	910.119	1161.86	-0.00643942	0.991313
adam11	ENSDARG00000079204	567145	49.5174	7.91284	23.7818	19.7447	13.8196	18.8196	-0.632554	0.745975
adam12	ENSDARG00000079068	563275	1198.32	1192.86	1194.05	378.111	486.647	518.033	-1.3745	1.56304e-13
ADAM12oneOfMany	ENSDARG00000116062	101884222	72.2954	153.311	159.537	134.264	191.5	176.31	0.382494	0.641778
adam15	ENSDARG00000089213	795199	932.908	921.846	900.738	301.106	387.936	247.626	-1.55666	1.40748e-12
adam17a	ENSDARG00000043213	324142	1247.84	1329.36	1281.25	1050.42	1016.73	1070.73	-0.298234	0.136755
adam17b	ENSDARG00000093093	560657	718.003	569.725	520.228	384.034	538.964	442.755	-0.404659	0.261376
adam19a	ENSDARG00000059693		390.197	474.771	425.101	440.306	499.48	382.334	0.0354188	0.95579
adam19b	ENSDARG00000067545	571252	157.465	187.93	175.391	585.43	489.608	419.973	1.5214	2.31381e-10
adam22	ENSDARG00000060532	100126805	64.3726	155.29	273.491	21.7191	121.415	138.67	-0.807364	0.530817
adam23a	ENSDARG00000062323	794175	22.778	48.4662	80.2637	36.5277	67.1237	52.4967	0.0435401	0.982481
adam28	ENSDARG00000035514	767749	18.8166	80.1175	84.2274	98.7234	84.8918	82.2118	0.537371	0.659991
adam8a	ENSDARG00000001452	368917	1017.09	1024.71	674.81	1912.27	1670.2	1238.13	0.827406	0.00307439
adam8b	ENSDARG00000057644	100005593	326.815	260.135	211.064	255.694	203.345	172.348	-0.337866	0.55479
adam9	ENSDARG00000010070	447940	673.437	652.809	647.064	329.736	508.364	408.087	-0.663094	0.0122408
adamts1	ENSDARG00000103519	565145	1102.26	2061.3	1883.72	681.191	1422.43	1236.15	-0.595758	0.206208
adamts10	ENSDARG00000075188	564734	1288.44	1429.26	1647.88	965.515	1120.37	1419.39	-0.316655	0.351734
adamts12	ENSDARG00000067549	100003937	963.609	1160.22	966.138	730.553	982.178	731.982	-0.337921	0.289142
adamts14	ENSDARG00000078494	101886422	335.728	452.021	295.291	302.094	348.451	343.705	-0.123427	0.856064
adamts15a	ENSDARG00000029124	569571	119.832	277.939	311.146	90.8255	114.505	147.585	-1.00633	0.0661226
adamts15b	ENSDARG00000058252	100001991	107.948	124.627	145.664	54.2979	70.0851	89.1453	-0.824933	0.10025
adamts16	ENSDARG00000074646	568792	32.6815	112.758	47.5637	53.3106	60.2139	36.6486	-0.361995	0.806817
adamts17	ENSDARG00000075555	101884120	148.552	191.886	184.309	101.685	120.428	81.2213	-0.790669	0.0529242
adamts18	ENSDARG00000001999	100150128	207.973	413.446	311.146	270.502	386.949	303.094	0.042643	0.965258
adamts2	ENSDARG00000075930	571682	89.1314	183.974	96.1183	44.4255	45.4072	44.5726	-1.45793	0.00480869
adamts3	ENSDARG00000060127	102467218	723.945	1298.7	1262.42	740.425	1101.62	1063.8	-0.176966	0.793524
adamts5	ENSDARG00000100307	565053	296.114	167.159	269.528	384.034	402.742	383.325	0.675162	0.0594248
adamts6	ENSDARG00000041982	569099	1381.54	1720.05	1241.61	1058.31	1451.06	1105.4	-0.264853	0.49879
ADAMTS7	ENSDARG00000102478	560364	1931.18	2031.62	1738.06	1497.63	1634.66	1493.68	-0.301422	0.154316
adamts8a	ENSDARG00000007709	569618	11.8842	32.6405	41.6182	39.4894	26.6521	27.7341	0.124043	0.951316
adamts9	ENSDARG00000077778	100333407	1084.43	1219.57	1123.69	931.949	985.14	940.978	-0.262199	0.263068
adamtsl2	ENSDARG00000074033	100537087	5.94209	22.7494	44.591	26.6553	30.6005	11.886	-0.0838073	0.975472
adamtsl3	ENSDARG00000027903	100534944	283.24	344.209	242.773	194.485	295.147	383.325	0.00448972	0.997107
adamtsl5	ENSDARG00000052118	101886605	73.2858	65.2809	70.3546	87.8638	123.389	162.443	0.838864	0.11009
adamtsl7	ENSDARG00000055439	556634	60.4113	78.1393	58.4637	54.2979	94.7629	103.012	0.355485	0.715297
adap2	ENSDARG00000070565	100331455	23.7684	32.6405	41.6182	76.017	59.2268	56.4587	0.967654	0.170286
adar	ENSDARG00000012389	58119	1040.86	742.818	884.883	1113.6	1088.79	1130.16	0.320571	0.268694
adarb1a	ENSDARG00000041609	58134	27.7298	56.379	92.1547	55.2851	50.3428	73.2972	0.021606	0.989116
adarb1b	ENSDARG00000003544	558759	309.979	191.886	283.4	242.86	280.34	294.179	0.0578303	0.945066
adarb2	ENSDARG00000071823	558149	56.4499	94.9541	40.6273	47.3872	116.479	95.0883	0.431313	0.715423
adat1	ENSDARG00000061348	792614	23.7684	40.5533	48.5546	55.2851	75.0207	51.5062	0.687738	0.447582
adat2	ENSDARG00000041944	100034610	7.92279	28.6841	11.8909	25.6681	41.4588	46.5537	1.22886	0.292705
adat3	ENSDARG00000005640	368634	56.4499	46.4879	54.5001	44.4255	53.3041	44.5726	-0.145791	0.907892
adck1	ENSDARG00000062561	100144553	80.2182	73.1938	38.6455	74.0425	76.0078	49.5252	0.0554206	0.97058
adck2	ENSDARG00000073923	572087	151.523	175.072	186.291	149.072	188.539	199.091	0.0654634	0.936992
adck5	ENSDARG00000075405	100001584	143.601	163.202	157.555	128.34	132.273	178.291	-0.0813798	0.925149
adcy1a	ENSDARG00000069026	557026	0	0.989105	10.9	5.9234	5.92268	5.94302	0.581488	0.904159
adcy2a	ENSDARG00000058392	563724	19.807	6.92374	3.96364	0	1.97423	18.8196	-0.56209	0.899143
adcy2b	ENSDARG00000014588	557902	1393.42	1241.33	1223.77	638.74	800.549	650.761	-0.884501	1.47e-06
adcy3a	ENSDARG00000077145	571825	138.649	106.823	202.146	108.596	175.706	195.129	0.0990521	0.929237
adcy5	ENSDARG00000091342	562619	387.226	274.971	320.064	233.974	279.353	306.066	-0.261562	0.608608
adcy6a	ENSDARG00000061445	570652	518.943	506.422	509.328	229.038	288.237	366.486	-0.796257	0.00395278
adcy6b	ENSDARG00000027797	560807	269.375	188.919	199.173	184.613	209.268	202.063	-0.141739	0.844098
adcy7	ENSDARG00000060070	568726	1296.37	1260.12	1218.82	796.698	648.534	619.065	-0.870932	1.57223e-06
adcy8	ENSDARG00000031783	100148976	10.8938	6.92374	9.9091	28.6298	48.3686	54.4777	2.24547	0.00458411
adcy9	ENSDARG00000100869	100333702	1065.61	1155.27	1078.11	768.068	740.335	855.795	-0.480692	0.0108841
adcyap1b	ENSDARG00000027740	335625	11.8842	14.8366	38.6455	11.8468	2.96134	12.8765	-1.23954	0.48686
adcyap1r1a	ENSDARG00000053724	555473	4.95174	41.5424	34.6819	29.617	29.6134	28.7246	0.115693	0.962879
add1	ENSDARG00000103962	555511	1748.96	1308.59	1523.03	1508.49	1315.82	1281.71	-0.157777	0.688578
add2	ENSDARG00000074581	570147	7.92279	18.793	42.6091	0.987234	13.8196	20.8006	-0.961308	0.694685
add3a	ENSDARG00000040874	556762	2130.24	2133.5	2188.92	1026.72	1121.36	1489.72	-0.826841	3.52975e-05
add3b	ENSDARG00000056250	553243	4.95174	7.91284	5.94546	2.9617	11.8454	3.96201	-0.00306313	0.99967
adgb	ENSDARG00000005595	555435	0	1.97821	10.9	1.97447	9.87114	10.8955	0.82042	0.853472
adgra2	ENSDARG00000076994	560700	4894.3	4291.73	4929.78	3105.84	3372.97	3880.79	-0.446347	0.0171362
adgra3	ENSDARG00000073673		254.52	367.947	327	229.038	343.516	365.496	-0.0174773	0.98497
adgrb1a	ENSDARG00000075133	563527	81.2086	94.9541	146.655	219.166	205.32	168.386	0.877041	0.0440702
adgrb2	ENSDARG00000025667		16.8359	15.8257	29.7273	2.9617	1.97423	4.95252	-2.65779	0.0376861
adgrb3	ENSDARG00000059832	566117	121.813	77.1502	84.2274	33.566	47.3815	59.4302	-1.01253	0.089962
adgrd1	ENSDARG00000053344		40.6043	142.431	94.1365	67.1319	87.8531	97.0693	-0.137087	0.927221
adgrd2	ENSDARG00000103067	571770	7.92279	22.7494	30.7182	26.6553	35.5361	29.7151	0.582171	0.721089
adgre10	ENSDARG00000075855	569655	0	13.8475	15.8546	0	10.8583	0	-1.45159	0.782101
adgre5a	ENSDARG00000026313		3.96139	0	0	4.93617	12.8325	0.990503	2.24369	0.608982
adgre5b.2	ENSDARG00000104083	101882660	24.7587	30.6623	39.6364	12.834	15.7938	31.6961	-0.656219	0.649778
adgre5b.3	ENSDARG00000112943	100536657	282.249	291.786	342.855	376.136	418.536	328.847	0.293229	0.468802
adgrf3b	ENSDARG00000093008	565465	0	3.95642	0.99091	2.9617	13.8196	0	1.76205	0.728628
adgrf6	ENSDARG00000091757		33.6718	81.1066	22.7909	4.93617	26.6521	15.8481	-1.53612	0.215103
adgrf8	ENSDARG00000093316	100537224	4.95174	12.8584	9.9091	0	14.8067	18.8196	0.278592	0.945181
adgrg1	ENSDARG00000027222	324948	48.5271	62.3136	103.055	128.34	122.402	147.585	0.897063	0.100899
adgrg11	ENSDARG00000041413	563883	0	1.97821	1.98182	0	0	8.91453	1.17038	1
adgrg2a	ENSDARG00000088137	101882832	70.3147	86.0522	29.7273	5.9234	51.3299	29.7151	-1.09748	0.419456
adgrg3	ENSDARG00000074782	799479	1.9807	1.97821	2.97273	175.728	77.982	48.5347	5.44652	7.83752e-11
adgrg4b	ENSDARG00000094386		6.93244	9.89105	14.8637	3.94894	3.94846	1.98101	-1.68132	0.419658
adgrg6	ENSDARG00000054137	561970	407.033	307.612	362.673	389.957	564.629	478.413	0.411602	0.268784
adgrl1a	ENSDARG00000089292	562531	238.674	203.756	167.464	69.1064	100.686	163.433	-0.872137	0.0972576
adgrl2a	ENSDARG00000069356	57987	2311.47	2603.33	2935.08	2318.03	2695.81	3469.73	0.111997	0.830967
adgrl2b.1	ENSDARG00000111712	110437953	223.819	340.252	280.428	295.183	375.103	456.622	0.416173	0.369483
ADGRL3	ENSDARG00000090624		355.535	597.42	550.946	463.013	518.235	745.849	0.199619	0.772817
adgrl3.1	ENSDARG00000061121	560631	1517.21	1680.49	1816.34	1897.46	2080.84	1982	0.249411	0.292041
adgrl4	ENSDARG00000013653	406676	989.358	754.687	972.083	348.494	416.562	485.347	-1.11918	7.36817e-07
adgrv1	ENSDARG00000021137	415105	464.473	639.951	1098.92	900.357	1226.98	1296.57	0.635951	0.16206
adh5	ENSDARG00000080010	116517	483.29	293.764	431.046	686.128	425.446	429.878	0.351568	0.532841
adh8b	ENSDARG00000024278	402841	419.908	497.52	387.446	340.596	298.108	262.483	-0.533998	0.0753951
adhfe1	ENSDARG00000053518	404618	144.591	132.54	187.282	142.162	139.183	185.224	0.00666289	0.994378
adi1	ENSDARG00000020448	324079	126.765	80.1175	93.1456	131.302	93.7758	94.0978	0.0892886	0.935866
adipor1a	ENSDARG00000002912	436740	443.676	311.568	381.501	353.43	405.704	311.018	-0.0870673	0.899143
adipor1b	ENSDARG00000042717	406821	46.5464	69.2374	28.7364	81.9404	46.3943	59.4302	0.377617	0.763918
adipor2	ENSDARG00000101849	560140	453.58	484.662	521.219	366.264	396.82	357.572	-0.381081	0.16508
adka	ENSDARG00000039429	368220	462.493	433.228	534.101	636.766	629.779	622.036	0.401478	0.109857
adkb	ENSDARG00000095947	322229	59.4209	38.5751	48.5546	103.66	70.0851	38.6296	0.535291	0.618235
adm2a	ENSDARG00000045708	403114	17.8263	7.91284	2.97273	12.834	28.6263	8.91453	0.811123	0.731481
adm2b	ENSDARG00000078875	100322075	10.8938	0	0	0	0	0.990503	-3.35833	1
adma	ENSDARG00000015263	556502	650.659	529.171	589.592	1051.4	862.737	849.852	0.643487	0.00293982
admb	ENSDARG00000069027	570100	40.6043	62.3136	53.5092	15.7957	41.4588	9.90503	-1.21969	0.240406
adnp2a	ENSDARG00000060937	100007394	382.274	449.054	381.501	464	492.57	419.973	0.182678	0.671512
adnp2b	ENSDARG00000028431	564171	1111.17	1077.14	1153.42	1217.26	1193.42	1279.73	0.143186	0.635912
adnpa	ENSDARG00000062002	564637	1697.46	1305.62	1374.39	1503.56	1426.38	1468.92	0.00703241	0.988948
adnpb	ENSDARG00000074293	100330315	366.429	432.239	416.182	471.898	449.137	488.318	0.214244	0.571103
adoa	ENSDARG00000042827	494091	172.321	175.072	162.509	228.051	136.222	158.481	0.035922	0.97058
adob	ENSDARG00000053571	406474	79.2279	72.2047	88.191	126.366	93.7758	55.4682	0.201931	0.863569
adora1b	ENSDARG00000075694	100150997	0	13.8475	3.96364	5.9234	0.987114	2.97151	-0.849959	0.861659
adora2aa	ENSDARG00000033706	561701	52.4885	78.1393	105.037	73.0553	118.454	79.2403	0.200256	0.868437
adora2ab	ENSDARG00000058488	566118	29.7105	11.8693	5.94546	12.834	18.7552	27.7341	0.319834	0.899143
adora2b	ENSDARG00000002533	560100	278.288	245.298	237.818	205.345	196.436	165.414	-0.42479	0.268475
adpgk	ENSDARG00000063525	557919	285.22	416.413	287.364	315.915	340.554	275.36	-0.0859014	0.906958
adpgk2	ENSDARG00000062785	566398	658.582	947.563	740.21	606.162	728.49	697.314	-0.207554	0.640198
adprh	ENSDARG00000040712	445059	22.778	20.7712	8.91819	5.9234	7.89691	3.96201	-1.56085	0.318205
adprhl1	ENSDARG00000041589	450012	2.97105	9.89105	5.94546	0	6.9098	0.990503	-1.25114	0.76413
adprhl2	ENSDARG00000019338	796446	82.1989	66.2701	62.4274	107.609	53.3041	53.4872	0.023813	0.987457
adprm	ENSDARG00000026090	393393	2.97105	13.8475	8.91819	6.91064	5.92268	24.7626	0.546521	0.859205
adra1aa	ENSDARG00000028725	798498	233.722	215.625	220.973	217.191	273.431	339.743	0.308865	0.54814
adra1ba	ENSDARG00000011317	100149100	418.917	256.178	272.5	240.885	236.907	170.367	-0.547891	0.230999
adra1bb	ENSDARG00000041173	492486	18.8166	4.94553	4.95455	0.987234	0	0	-4.75673	0.0751976
adra1d	ENSDARG00000024101	568614	897.256	821.946	813.537	262.604	194.461	277.341	-1.78608	2.0757e-17
adra2a	ENSDARG00000040841	266750	0	7.91284	4.95455	0.987234	3.94846	19.8101	0.943229	0.830967
adra2b	ENSDARG00000102096	266751	68.334	89.0195	79.2728	106.621	107.595	105.984	0.436353	0.477454
adra2da	ENSDARG00000091277	266754	38.6236	37.586	35.6728	39.4894	29.6134	26.7436	-0.223142	0.880576
adrb1	ENSDARG00000007490	557194	24.7587	7.91284	5.94546	19.7447	13.8196	24.7626	0.594888	0.787171
adrb2a	ENSDARG00000088124	565838	159.446	81.1066	83.2365	87.8638	82.9176	100.041	-0.257719	0.800889
adrb3a	ENSDARG00000053646	558248	141.62	98.9105	69.3637	670.332	727.503	343.705	2.49052	9.19642e-11
adrm1	ENSDARG00000058560	796450	825.951	723.036	592.564	872.715	746.258	520.014	-0.00171384	0.99967
adsl	ENSDARG00000017049	334431	175.292	142.431	126.837	176.715	137.209	132.727	0.00679096	0.994065
adss	ENSDARG00000002071	550502	102.996	49.4553	31.7091	12.834	47.3815	45.5632	-0.799959	0.553297
adssl	ENSDARG00000012399	192305	379.303	255.189	313.128	719.694	439.266	471.48	0.782895	0.0230126
adssl1	ENSDARG00000099517	407989	107.948	76.1611	27.7455	16.783	47.3815	39.6201	-1.02952	0.341453
adtrp1	ENSDARG00000037810	550414	91.1121	111.769	96.1183	149.072	138.196	100.041	0.373374	0.574039
aebp1	ENSDARG00000091726	793308	1203.27	1476.73	1341.69	1375.22	1380.97	1228.22	-0.0134352	0.978575
aebp2	ENSDARG00000006038	406815	433.773	417.402	430.055	377.123	438.279	381.344	-0.0984026	0.848907
aep1	ENSDARG00000039099	503710	1160.69	2035.58	825.428	226.077	770.936	514.071	-1.41222	0.130892
aes	ENSDARG00000021805	393395	234.713	174.083	194.218	224.102	245.791	171.357	0.0887377	0.912714
afap1	ENSDARG00000055284	568356	725.925	651.82	685.71	726.604	776.859	769.621	0.139589	0.697492
afap1l1a	ENSDARG00000089162	566757	408.024	445.097	393.391	155.983	232.959	222.863	-1.02677	0.000135197
afap1l1b	ENSDARG00000056453	768144	1728.16	1500.47	1632.03	901.345	810.42	819.146	-0.94149	1.30606e-09
afap1l2	ENSDARG00000074806	567369	865.565	845.685	747.146	529.157	449.137	376.391	-0.859738	9.47819e-05
afdna	ENSDARG00000029472	558359	9290.46	10057.2	9972.52	4840.41	5918.73	6067.82	-0.801122	1.38016e-07
aff2	ENSDARG00000052242	100330019	451.599	573.681	625.264	388.97	452.098	513.081	-0.28557	0.49427
aff3	ENSDARG00000079575	570215	154.494	146.388	229.891	443.268	308.967	314.98	1.00771	0.00333137
aff4	ENSDARG00000001857	556421	1244.87	1483.66	1609.24	1310.06	1357.28	1534.29	-0.0460078	0.927644
afg1la	ENSDARG00000011466	561238	34.6622	53.4117	53.5092	44.4255	55.2784	54.4777	0.122962	0.927997
afg1lb	ENSDARG00000042902	555926	11.8842	50.4444	71.3455	81.9404	62.1882	91.1263	0.815498	0.483115
afg3l2	ENSDARG00000062272	569168	277.298	337.285	255.655	321.838	321.799	348.657	0.189336	0.708079
afmid	ENSDARG00000099106	550372	0	33.6296	11.8909	35.5404	21.7165	56.4587	1.32074	0.530817
afp4	ENSDARG00000095863	568707	0	1.97821	1.98182	5.9234	12.8325	0	2.24382	0.603471
aftpha	ENSDARG00000069249	556043	288.191	209.69	212.055	226.077	166.822	218.901	-0.214639	0.740377
aftphb	ENSDARG00000071347	100004990	74.2761	23.7385	59.4546	33.566	36.5232	49.5252	-0.396692	0.782065
aga	ENSDARG00000004889	566517	31.6912	75.172	83.2365	80.9532	47.3815	35.6581	-0.213073	0.894916
agap1	ENSDARG00000062123	100148154	1891.57	2150.31	2015.51	1425.57	1839.98	1949.31	-0.216076	0.523116
agap2	ENSDARG00000099874	565109	6.93244	8.90195	42.6091	361.328	203.345	149.566	3.61143	2.85778e-07
agap3	ENSDARG00000087822	324332	615.997	899.097	737.237	545.94	616.946	732.972	-0.248586	0.576055
AGBL1	ENSDARG00000104384	100536841	3.96139	19.7821	22.7909	8.88511	29.6134	6.93352	-0.0344942	0.990118
agbl2	ENSDARG00000079983	568152	0	6.92374	21.8	9.87234	5.92268	8.91453	-0.217142	0.959821
agbl4	ENSDARG00000068050	550450	23.7684	53.4117	38.6455	36.5277	37.5103	42.5916	0.00992596	0.995285
agbl5	ENSDARG00000045900	445479	156.475	117.704	182.328	150.06	115.492	109.946	-0.281787	0.699625
agfg1a	ENSDARG00000030020	327597	574.402	460.923	428.073	411.677	352.4	348.657	-0.395206	0.233831
agfg1b	ENSDARG00000019526	393560	252.539	177.05	153.591	140.187	145.106	91.1263	-0.631552	0.229115
aggf1	ENSDARG00000060109	559905	242.635	266.069	219.982	281.362	210.255	287.246	0.0960435	0.894532
agk	ENSDARG00000009837	334270	218.867	171.115	199.173	205.345	147.08	205.034	-0.0797934	0.922915
agla	ENSDARG00000103811	567798	481.309	477.738	492.482	439.319	503.428	574.492	0.063857	0.909689
aglb	ENSDARG00000100352	553352	6.93244	6.92374	9.9091	0	6.9098	9.90503	-0.499281	0.901342
agmat	ENSDARG00000059700	556522	1.9807	1.97821	1.98182	6.91064	8.88402	10.8955	2.16755	0.314026
agmo	ENSDARG00000025595	405819	42.585	19.7821	53.5092	48.3745	10.8583	59.4302	0.0342521	0.987604
ago1	ENSDARG00000092644	570775	650.659	707.21	902.719	605.174	733.426	848.861	-0.0474487	0.944008
ago2	ENSDARG00000061268	570630	1579.61	1323.42	1396.19	1365.34	1472.77	1550.14	0.0295699	0.95018
ago3a	ENSDARG00000059888	567622	781.385	898.108	867.047	763.132	828.188	667.599	-0.172894	0.645764
ago3b	ENSDARG00000063079	568159	222.828	301.677	218.991	216.204	176.693	152.538	-0.446904	0.33733
ago4	ENSDARG00000100854	100535764	1191.39	1180.99	1175.22	1297.23	1316.81	1235.16	0.117716	0.707655
agpat2	ENSDARG00000101139	777624	161.427	202.767	251.691	263.591	234.933	246.635	0.274899	0.625498
agpat3	ENSDARG00000036549	406734	1280.52	974.269	960.192	850.996	775.871	747.83	-0.437061	0.0898381
agpat4	ENSDARG00000069044	406265	630.852	520.269	515.273	425.498	402.742	411.059	-0.427203	0.104367
agpat5	ENSDARG00000063187	767778	299.085	268.048	245.746	404.766	370.168	395.211	0.52557	0.0519239
agpat9l	ENSDARG00000006491	567414	58.4306	36.5969	25.7637	49.3617	28.6263	19.8101	-0.304562	0.860142
agps	ENSDARG00000042821	386801	158.456	181.995	160.527	237.923	224.075	224.844	0.455223	0.210274
agr1	ENSDARG00000060682	335309	237.684	455.978	256.646	40.4766	208.281	208.006	-1.05697	0.178721
agr2	ENSDARG00000070480	335616	7.92279	26.7058	19.8182	6.91064	20.7294	18.8196	-0.228947	0.928943
agrn	ENSDARG00000079388	565373	5200.32	6582.5	6944.3	3753.46	5086.6	4925.77	-0.444038	0.0784783
agt	ENSDARG00000016412	322485	0	1.97821	2.97273	3.94894	7.89691	9.90503	2.13527	0.473491
agtpbp1	ENSDARG00000105214	554164	127.755	167.159	156.564	239.898	210.255	178.291	0.477146	0.279869
agtr1a	ENSDARG00000018616	794575	12.8745	8.90195	8.91819	3.94894	0	0	-2.95786	0.266848
agtr1b	ENSDARG00000045443	100333455	59.4209	74.1829	43.6001	72.0681	60.2139	43.5821	-0.0109232	0.993503
agtr2	ENSDARG00000035552	503772	511.02	367.947	332.946	236.936	286.263	246.635	-0.654658	0.0472179
agtrap	ENSDARG00000077082	793937	100.025	47.4771	53.5092	74.0425	30.6005	27.7341	-0.602552	0.624351
agxt2	ENSDARG00000100709	619269	32.6815	48.4662	21.8	22.7064	53.3041	37.6391	0.142642	0.93824
ahctf1	ENSDARG00000077530	553494	2279.78	1719.06	1814.36	2449.33	2119.33	2195.95	0.218675	0.500423
ahcy	ENSDARG00000005191	387530	1254.77	815.023	944.338	1605.24	1089.77	984.56	0.287806	0.570661
ahcyl1	ENSDARG00000056331	798918	52.4885	83.0848	60.4455	140.187	122.402	97.0693	0.875635	0.0878369
ahcyl2	ENSDARG00000039343	394240	536.769	398.609	452.846	492.63	456.047	423.935	-0.0163009	0.980837
ahdc1	ENSDARG00000093453	100536210	341.67	416.413	523.201	283.336	313.902	471.48	-0.261735	0.674468
ahi1	ENSDARG00000044056	562701	446.647	435.206	566.801	413.651	504.415	630.951	0.0966263	0.88867
ahnak	ENSDARG00000061764	559276	56678.6	66091	57818.6	33057.5	45570.1	42637.2	-0.574543	0.00313837
ahr1a	ENSDARG00000020046	246224	0	5.93463	1.98182	0	2.96134	8.91453	0.584812	0.927221
ahr1b	ENSDARG00000023537	554265	93.0928	41.5424	83.2365	72.0681	96.7372	72.3067	0.146276	0.910202
ahr2	ENSDARG00000021833	30517	4265.43	3963.34	3913.11	4619.27	3909.96	3537.09	-0.00900362	0.986393
ahrra	ENSDARG00000099702	641291	15.8456	21.7603	7.92728	12.834	14.8067	10.8955	-0.240716	0.92243
ahsa1a	ENSDARG00000028664	565968	118.842	44.5097	59.4546	39.4894	66.1366	39.6201	-0.617238	0.564173
ahsa1b	ENSDARG00000100317	321945	242.635	169.137	170.437	305.055	211.242	220.882	0.340496	0.558497
aida	ENSDARG00000014532	393763	133.697	117.704	116.927	80.9532	68.1109	93.1073	-0.605007	0.229962
aif1l	ENSDARG00000009336	321033	118.842	121.66	134.764	112.545	61.2011	84.1928	-0.540878	0.382731
aifm1	ENSDARG00000058088	373125	683.34	655.777	577.701	988.221	801.536	680.476	0.365945	0.258342
aifm2	ENSDARG00000077549	557507	217.877	253.211	130.8	186.587	178.668	111.927	-0.334934	0.671528
aifm4	ENSDARG00000061634	791218	56.4499	39.5642	30.7182	26.6553	51.3299	25.7531	-0.288777	0.856264
aifm5	ENSDARG00000075551	557064	9.90348	5.93463	0	0	0.987114	0	-3.89826	1
aig1	ENSDARG00000007171	562261	0	13.8475	16.8455	3.94894	3.94846	27.7341	0.215097	0.961667
aimp1	ENSDARG00000060036	562232	152.514	81.1066	86.2092	160.919	98.7114	100.041	0.169406	0.886079
aimp2	ENSDARG00000018903	406647	137.658	159.246	128.818	239.898	160.9	141.642	0.349567	0.591984
aip	ENSDARG00000104437	334795	417.927	359.045	433.028	569.634	351.413	360.543	0.0829462	0.913142
aipl1	ENSDARG00000075067	100537095	4.95174	11.8693	5.94546	1.97447	0.987114	3.96201	-1.71774	0.530817
aipl2	ENSDARG00000098164	100534741	0	10.8802	6.93637	2.9617	8.88402	17.8291	0.735854	0.8505
ajap1	ENSDARG00000038655	101887016	16.8359	8.90195	20.8091	7.89787	30.6005	20.8006	0.349366	0.88577
ajuba	ENSDARG00000077842	572549	979.455	932.726	998.838	744.374	869.647	939.988	-0.188769	0.578991
ak1	ENSDARG00000001950	445486	38.6236	34.6187	23.7818	24.6808	42.4459	24.7626	-0.0784117	0.96549
ak2	ENSDARG00000005926	321793	361.477	269.037	252.682	397.855	263.559	282.293	0.0956189	0.904395
ak3	ENSDARG00000058226	406404	56.4499	49.4553	60.4455	90.8255	46.3943	111.927	0.582727	0.512217
ak4	ENSDARG00000006546	406590	171.33	99.8996	127.827	80.9532	92.7887	189.186	-0.136969	0.913471
ak5l	ENSDARG00000017739	548336	27.7298	46.4879	38.6455	12.834	12.8325	17.8291	-1.37575	0.119662
AK6	ENSDARG00000035573	415208	33.6718	12.8584	31.7091	86.8766	43.433	33.6771	1.06771	0.307615
ak7a	ENSDARG00000019001	402854	13.8649	18.793	10.9	9.87234	6.9098	8.91453	-0.761407	0.700289
ak7b	ENSDARG00000017023	504040	2.97105	0	9.9091	0	1.97423	0	-2.70518	1
ak9	ENSDARG00000021913	557708	23.7684	6.92374	13.8727	1.97447	18.7552	5.94302	-0.740427	0.788286
akap10	ENSDARG00000059549	566920	229.761	305.634	253.673	212.255	276.392	255.55	-0.0844789	0.907076
akap11	ENSDARG00000075435	558595	690.273	840.739	959.201	614.06	647.547	766.65	-0.296041	0.404494
akap12a	ENSDARG00000091792	101885554	126.765	178.039	134.764	121.43	170.771	98.0598	-0.171618	0.857974
akap12b	ENSDARG00000055678	567365	34449.3	34190.4	33318.4	22230.5	26338.2	23749.3	-0.495549	0.00048448
akap17a	ENSDARG00000104768	393655	162.417	162.213	214.037	195.472	134.247	157.49	-0.144834	0.859954
akap1b	ENSDARG00000006062	556208	585.296	564.779	657.965	1157.04	1156.9	1208.41	0.962116	2.40202e-09
akap6	ENSDARG00000077295	100002625	138.649	154.3	149.627	70.0936	184.59	197.11	0.0297069	0.983229
akap7	ENSDARG00000043843		28.7201	10.8802	3.96364	0.987234	2.96134	10.8955	-1.55361	0.535959
akap8l	ENSDARG00000099635	406500	1543.95	1586.52	1565.64	1653.62	1678.09	1606.6	0.0725501	0.836142
akap9	ENSDARG00000079610	565037	666.504	1078.12	745.165	667.37	653.469	604.207	-0.371136	0.32237
akip1	ENSDARG00000069037	562301	7.92279	19.7821	26.7546	25.6681	30.6005	13.867	0.365056	0.866018
akirin1	ENSDARG00000039969	406432	278.288	306.623	241.782	321.838	361.284	336.771	0.302984	0.437109
akirin2	ENSDARG00000058729	406855	483.29	368.936	406.273	479.796	443.214	540.815	0.21803	0.618784
akna	ENSDARG00000087110	556113	450.609	352.121	437.982	181.651	238.882	394.22	-0.606773	0.204871
akr1a1b	ENSDARG00000052030	799805	256.5	149.355	196.2	152.034	78.9691	87.1643	-0.920073	0.0706628
akr1b1	ENSDARG00000006215	415138	1.9807	10.8802	28.7364	11.8468	30.6005	23.7721	0.670809	0.787891
akr7a3	ENSDARG00000016649	436642	49.5174	139.464	112.964	101.685	134.247	166.405	0.41408	0.671974
akt1	ENSDARG00000099657		111.909	126.605	97.1092	105.634	128.325	113.908	0.0516764	0.956901
akt1s1	ENSDARG00000074667	566559	1004.21	585.55	932.447	776.953	652.482	1173.75	0.0455798	0.959532
akt2	ENSDARG00000011219	378972	1233.97	1029.66	1037.48	1366.33	1166.77	1200.49	0.177614	0.606371
akt2l	ENSDARG00000103612	403146	162.417	77.1502	93.1456	81.9404	80.9433	39.6201	-0.716247	0.373997
akt3a	ENSDARG00000104810	560549	104.977	166.17	161.518	116.494	102.66	139.661	-0.270051	0.72849
akt3b	ENSDARG00000087205	100149794	195.099	248.265	259.619	205.345	216.178	224.844	-0.121145	0.859884
aktip	ENSDARG00000026862	378716	186.186	181.006	163.5	147.098	136.222	187.205	-0.173651	0.804772
AL590149.1	ENSDARG00000012581		47.5367	66.2701	34.6819	20.7319	15.7938	49.5252	-0.787275	0.521494
AL590150.1	ENSDARG00000092341		6.93244	12.8584	30.7182	14.8085	12.8325	25.7531	0.0800975	0.976321
AL590151.1	ENSDARG00000053570	368435	22.778	37.586	24.7728	33.566	51.3299	37.6391	0.525317	0.661678
AL590152.1	ENSDARG00000110696		0	1.97821	10.9	0.987234	0	1.98101	-2.11762	1
AL627305.1	ENSDARG00000100324	572670	33.6718	47.4771	52.5183	26.6553	37.5103	72.3067	0.0298595	0.987457
AL627305.3	ENSDARG00000102019		0	0.989105	1.98182	0	9.87114	0	1.73246	1
AL645691.2	ENSDARG00000102716		65.363	27.6949	24.7728	44.4255	58.2397	34.6676	0.221013	0.897507
AL645792.2	ENSDARG00000103788	101883946	13.8649	5.93463	2.97273	0	0	6.93352	-1.71623	0.681681
AL732488.1	ENSDARG00000096717	110438942	113.89	78.1393	80.2637	78.9787	78.9691	60.4207	-0.318346	0.71396
AL732515.1	ENSDARG00000095199		0	12.8584	0.99091	0	0	0.990503	-3.70472	1
AL772146.2	ENSDARG00000105823		11.8842	23.7385	9.9091	11.8468	16.7809	21.7911	0.146945	0.9524
AL772241.1	ENSDARG00000110792		28.7201	91.9868	41.6182	25.6681	50.3428	28.7246	-0.632137	0.635745
AL772314.1	ENSDARG00000097492		8.91314	19.7821	10.9	4.93617	3.94846	15.8481	-0.679219	0.792154
AL772373.1	ENSDARG00000117427		72.2954	83.0848	63.4183	61.2085	60.2139	52.4967	-0.331176	0.708106
AL773558.1	ENSDARG00000098223		14.8552	0.989105	4.95455	0.987234	15.7938	0.990503	-0.226742	0.964721
AL831726.1	ENSDARG00000086880		9.90348	2.96732	10.9	2.9617	3.94846	4.95252	-1.00279	0.731156
AL831745.1	ENSDARG00000039423	368914	4.95174	2.96732	4.95455	0	4.93557	9.90503	0.204963	0.967733
AL831768.1	ENSDARG00000100923	100534861	0	0	0.99091	14.8085	1.97423	7.92403	4.53707	0.128335
AL840638.1	ENSDARG00000098608		51.4981	28.6841	36.6637	54.2979	37.5103	25.7531	0.00889806	0.996198
AL844141.1	ENSDARG00000096964		0	18.793	0.99091	12.834	2.96134	12.8765	0.535142	0.907892
AL844185.1	ENSDARG00000095868		0	10.8802	7.92728	0	0	0	-5.10795	1
AL844518.1	ENSDARG00000111211	100150820	0	5.93463	5.94546	11.8468	10.8583	0	0.934559	0.850222
AL845312.1	ENSDARG00000093679		0	9.89105	10.9	1.97447	2.96134	8.91453	-0.586255	0.899069
AL845320.2	ENSDARG00000114981		0	6.92374	3.96364	0.987234	16.7809	12.8765	1.49286	0.663857
AL845324.1	ENSDARG00000023609		0.990348	8.90195	5.94546	4.93617	15.7938	3.96201	0.640715	0.861242
AL845428.1	ENSDARG00000041007	101883115	2.97105	0	11.8909	0	1.97423	0	-2.91164	1
AL928650.2	ENSDARG00000096526		0.990348	1.97821	7.92728	22.7064	9.87114	11.886	2.02904	0.291925
AL928650.3	ENSDARG00000096599	103911855	1.9807	7.91284	1.98182	46.4	13.8196	9.90503	2.56179	0.0996337
AL928650.4	ENSDARG00000113858		100.025	103.856	88.191	448.204	195.449	155.509	1.45218	0.00385945
AL928685.2	ENSDARG00000095907	555502	273.336	264.091	313.128	231.013	287.25	283.284	-0.0856204	0.898082
AL928714.1	ENSDARG00000117452		43.5753	88.0304	48.5546	55.2851	78.9691	62.4017	0.126362	0.927598
AL928808.1	ENSDARG00000101333		217.877	254.2	279.437	181.651	325.748	346.676	0.184545	0.817771
AL928824.1	ENSDARG00000094456		191.137	238.374	211.064	86.8766	133.26	113.908	-0.939337	0.00829054
AL928854.1	ENSDARG00000105454		0	33.6296	19.8182	0.987234	7.89691	8.91453	-1.58648	0.595799
AL928908.2	ENSDARG00000097490		0	0	23.7818	42.4511	23.6907	0	1.47573	0.894878
AL928908.3	ENSDARG00000097636		0	15.8257	0	8.88511	15.7938	24.7626	1.64324	0.62016
AL928977.1	ENSDARG00000094655		0	2.96732	5.94546	8.88511	2.96134	0.990503	0.52654	0.922846
AL929017.1	ENSDARG00000074868	100170822	308.989	349.154	351.773	313.94	360.297	394.22	0.0812755	0.894532
AL929017.2	ENSDARG00000095449		3.96139	1.97821	7.92728	0	13.8196	1.98101	0.188518	0.972584
AL929028.1	ENSDARG00000105095		208.964	410.479	405.282	253.719	331.67	355.591	-0.123014	0.893856
AL929048.1	ENSDARG00000117298		0.990348	8.90195	0.99091	8.88511	7.89691	4.95252	0.997722	0.781258
AL929058.1	ENSDARG00000092980	110438186	16.8359	27.6949	2.97273	12.834	10.8583	4.95252	-0.72971	0.780846
AL929114.1	ENSDARG00000100085		0	1.97821	3.96364	0	2.96134	10.8955	1.22148	0.830967
AL929114.2	ENSDARG00000101825		0	4.94553	16.8455	0	31.5876	0	0.535666	0.964057
AL929171.1	ENSDARG00000095920	110439353	18.8166	0	4.95455	3.94894	12.8325	0	-0.502168	0.927221
AL929210.2	ENSDARG00000117295		100.025	88.0304	42.6091	53.3106	112.531	124.803	0.333413	0.788286
AL929220.1	ENSDARG00000103323		0	0	5.94546	3.94894	3.94846	12.8765	1.80505	0.668411
AL929222.2	ENSDARG00000097738		317.902	458.945	281.419	354.417	317.851	300.123	-0.122101	0.867618
AL929229.1	ENSDARG00000091975		26.7394	6.92374	17.8364	13.8213	10.8583	8.91453	-0.616246	0.778247
AL929237.2	ENSDARG00000095450		43.5753	32.6405	26.7546	15.7957	24.6778	27.7341	-0.594293	0.647087
AL929237.3	ENSDARG00000096676	103909355	0	10.8802	11.8909	0	1.97423	12.8765	-0.616909	0.908823
AL929243.1	ENSDARG00000096290		85.17	75.172	101.073	90.8255	113.518	97.0693	0.205429	0.81647
AL929276.2	ENSDARG00000116984		0.990348	6.92374	12.8818	4.93617	8.88402	10.8955	0.2491	0.947576
AL929309.1	ENSDARG00000097916		2.97105	15.8257	10.9	8.88511	7.89691	8.91453	-0.208791	0.948587
AL929315.1	ENSDARG00000092557		13.8649	3.95642	2.97273	0	5.92268	0	-1.81148	0.672095
AL929435.1	ENSDARG00000097234		1156.73	1450.03	1231.7	995.132	1445.13	1286.66	-0.0425429	0.945175
AL929457.1	ENSDARG00000095483		0.990348	2.96732	19.8182	15.7957	7.89691	35.6581	1.3198	0.592207
AL929457.2	ENSDARG00000098067		0	8.90195	0.99091	1.97447	8.88402	12.8765	1.26227	0.753085
AL929520.2	ENSDARG00000095426		0	0	0	53.3106	15.7938	11.886	7.21176	6.41072e-05
AL929536.3	ENSDARG00000113274		18.8166	20.7712	14.8637	50.3489	15.7938	12.8765	0.537295	0.785562
AL929536.5	ENSDARG00000115762		25.7491	22.7494	21.8	26.6553	16.7809	19.8101	-0.152496	0.937066
AL935053.1	ENSDARG00000105513		51.4981	74.1829	104.046	53.3106	80.9433	73.2972	-0.146447	0.90868
AL935065.1	ENSDARG00000099693	567472	0	2.96732	15.8546	0	8.88402	6.93352	-0.250866	0.96549
AL935115.1	ENSDARG00000097120		0	0	0	0	16.7809	2.97151	5.17601	0.229115
AL935126.2	ENSDARG00000111309		0.990348	1.97821	2.97273	0.987234	15.7938	2.97151	1.73332	0.625773
AL935145.1	ENSDARG00000096400		0	3.95642	1.98182	6.91064	3.94846	11.886	1.93717	0.529981
AL935174.2	ENSDARG00000112088		131.716	71.2156	91.1638	90.8255	76.0078	61.4112	-0.36565	0.68419
AL935174.5	ENSDARG00000117464	563381	486.261	467.847	539.055	571.608	477.763	527.938	0.0790989	0.882793
AL935183.1	ENSDARG00000094023		0	7.91284	4.95455	12.834	6.9098	3.96201	0.881523	0.817224
AL935186.10	ENSDARG00000115988		39.6139	0	23.7818	10.8596	0	5.94302	-1.91569	0.542216
AL935186.6	ENSDARG00000112275		719.983	1064.28	1305.03	916.153	533.041	743.868	-0.494328	0.264769
AL935186.8	ENSDARG00000113671		719.983	1064.28	1305.03	916.153	533.041	743.868	-0.494328	0.264769
AL935186.9	ENSDARG00000115978		4852.71	7785.25	7530.92	4843.37	3944.51	5691.43	-0.47814	0.137879
AL935198.1	ENSDARG00000092975		21.7877	1.97821	3.96364	11.8468	10.8583	0	-0.28823	0.95037
AL935269.1	ENSDARG00000117790		14.8552	35.6078	27.7455	147.098	65.1495	65.3732	1.82771	0.00746749
AL935295.1	ENSDARG00000092636	110438847	18.8166	7.91284	3.96364	0.987234	1.97423	2.97151	-2.37138	0.289521
AL935295.2	ENSDARG00000117663		0	32.6405	6.93637	24.6808	15.7938	35.6581	0.943742	0.732044
AL935300.2	ENSDARG00000097519		7.92279	2.96732	15.8546	0	2.96134	2.97151	-2.17263	0.441133
AL935300.3	ENSDARG00000098661	101885450	12.8745	1.97821	11.8909	0.987234	4.93557	2.97151	-1.58817	0.573819
AL953855.1	ENSDARG00000095108		0	5.93463	1.98182	13.8213	8.88402	0	1.52007	0.734687
AL953858.1	ENSDARG00000100195		1.9807	0.989105	2.97273	7.89787	11.8454	19.8101	2.73475	0.118095
AL953867.1	ENSDARG00000070885		36.6429	58.3572	64.4092	41.4638	0	70.3257	-0.511965	0.917228
AL953867.2	ENSDARG00000095689		1.9807	14.8366	54.5001	33.566	23.6907	16.8386	0.0552024	0.987196
AL953907.2	ENSDARG00000113960		0	8.90195	12.8818	5.9234	2.96134	1.98101	-1.00333	0.806156
AL954134.1	ENSDARG00000092078	110438025	9.90348	8.90195	8.91819	5.9234	2.96134	5.94302	-0.9029	0.721569
AL954191.1	ENSDARG00000117407	101885516	10.8938	5.93463	2.97273	0	8.88402	0	-1.15605	0.814312
AL954322.2	ENSDARG00000097072	101882098	56.4499	20.7712	33.691	59.234	30.6005	38.6296	0.211996	0.903049
AL954322.3	ENSDARG00000097266	101886962	9.90348	15.8257	8.91819	10.8596	21.7165	51.5062	1.27889	0.382971
AL954359.1	ENSDARG00000093646	103911997	16.8359	19.7821	28.7364	5.9234	20.7294	25.7531	-0.318645	0.89032
AL954359.2	ENSDARG00000094423	103911998	0	26.7058	0	9.87234	0	0	-1.4356	0.837185
AL954682.1	ENSDARG00000112674		100.025	99.8996	67.3819	5.9234	9.87114	12.8765	-3.22108	2.1909e-08
AL954694.1	ENSDARG00000092131		6.93244	36.5969	29.7273	27.6426	15.7938	42.5916	0.23175	0.920936
AL954696.1	ENSDARG00000078442	100332577	26.7394	69.2374	50.5364	96.7489	66.1366	86.1738	0.765419	0.343144
AL954696.2	ENSDARG00000117348		8.91314	3.95642	20.8091	0	13.8196	2.97151	-1.00398	0.782065
AL954698.1	ENSDARG00000098202		0.990348	5.93463	0	7.89787	5.92268	4.95252	1.43853	0.705434
AL954741.1	ENSDARG00000099302		62.392	56.379	92.1547	84.9021	63.1753	86.1738	0.151329	0.898561
AL954741.2	ENSDARG00000115737		203.021	126.605	187.282	143.149	150.041	167.395	-0.166439	0.837248
AL954767.1	ENSDARG00000094503		44.5657	32.6405	52.5183	11.8468	60.2139	64.3827	0.0728211	0.973201
AL954831.1	ENSDARG00000097701		13.8649	6.92374	13.8727	3.94894	3.94846	1.98101	-1.81072	0.345308
alad	ENSDARG00000100372	550338	48.5271	48.4662	34.6819	82.9277	46.3943	44.5726	0.401255	0.726258
alas1	ENSDARG00000021059	64608	313.94	437.185	288.355	431.421	477.763	413.04	0.347095	0.405668
alas2	ENSDARG00000038643	64607	0	3.95642	2.97273	0	13.8196	33.6771	2.77692	0.340207
alcama	ENSDARG00000026531	30194	2636.31	2784.33	2433.68	1569.7	2002.85	1725.46	-0.568034	0.00185521
alcamb	ENSDARG00000058538	323919	338.699	426.304	486.537	612.085	717.632	681.466	0.684341	0.00622548
aldh16a1	ENSDARG00000037935	492710	188.166	157.268	123.864	172.766	107.595	84.1928	-0.364329	0.65596
aldh18a1	ENSDARG00000099579	557186	567.47	560.823	518.246	672.306	647.547	669.58	0.272917	0.307614
aldh1a2	ENSDARG00000053493	116713	218.867	161.224	149.627	300.119	199.397	180.272	0.359882	0.573819
aldh1a3	ENSDARG00000076933	751785	0	2.96732	1.98182	26.6553	22.7036	16.8386	3.74132	0.00587736
aldh1l1	ENSDARG00000077004	100526683	291.162	329.372	506.355	360.34	358.322	353.61	-0.0716631	0.927598
aldh1l2	ENSDARG00000070230	100333269	164.398	205.734	209.082	375.149	288.237	243.664	0.647107	0.0786835
aldh2.1	ENSDARG00000089924	393462	307.998	312.557	400.328	253.719	266.521	305.075	-0.306812	0.47256
aldh2.2	ENSDARG00000028087	368239	548.653	405.533	313.128	473.872	413.601	364.505	-0.0175556	0.984801
aldh3a1	ENSDARG00000074791	100000026	47.5367	36.5969	36.6637	26.6553	48.3686	25.7531	-0.261354	0.863711
aldh3a2a	ENSDARG00000028259	323653	42.585	55.3899	54.5001	75.0298	58.2397	44.5726	0.222075	0.858728
aldh3a2b	ENSDARG00000029381	447920	161.427	166.17	138.727	115.506	109.57	89.1453	-0.569519	0.205018
aldh3b1	ENSDARG00000013839	282559	49.5174	47.4771	1.98182	29.617	40.4717	16.8386	-0.187258	0.948587
aldh4a1	ENSDARG00000038207	394133	204.012	305.634	266.555	266.553	254.675	335.781	0.14285	0.84057
aldh5a1	ENSDARG00000076544	565235	181.234	104.845	118.909	136.238	127.338	110.936	-0.112836	0.909393
aldh6a1	ENSDARG00000053485	436647	755.636	589.507	619.319	840.136	734.413	706.229	0.215402	0.572006
aldh7a1	ENSDARG00000018426	334197	254.52	234.418	158.546	297.157	260.598	207.015	0.240196	0.722123
aldh8a1	ENSDARG00000036776	447801	2.97105	40.5533	14.8637	459.064	246.778	116.879	3.81662	0.00991908
aldh9a1a.1	ENSDARG00000069100	100005587	1359.75	938.661	1182.16	1560.82	1047.33	1040.03	0.0678613	0.921667
aldh9a1a.2	ENSDARG00000055331	100006238	36.6429	52.4226	10.9	43.4383	26.6521	26.7436	-0.0459417	0.984801
aldh9a1b	ENSDARG00000037061	399481	88.141	86.0522	45.5819	102.672	72.0593	37.6391	-0.0493943	0.975716
aldoaa	ENSDARG00000011665	336425	1312.21	910.966	1430.87	1462.09	1355.31	1408.5	0.209767	0.630208
aldoab	ENSDARG00000034470	406496	291.162	235.407	146.655	81.9404	192.487	87.1643	-0.896695	0.149495
aldob	ENSDARG00000053684	321664	424.859	513.346	483.564	308.017	370.168	445.726	-0.339188	0.378206
aldocb	ENSDARG00000019702	369193	69.3244	67.2592	120.891	210.281	149.054	239.702	1.21823	0.00577502
alg1	ENSDARG00000054963	334161	256.5	219.581	144.673	198.434	174.719	190.177	-0.140055	0.868437
alg10	ENSDARG00000053917	100331575	47.5367	36.5969	55.491	70.0936	77.982	43.5821	0.45707	0.651703
alg11	ENSDARG00000031202	407614	81.2086	131.551	142.691	161.906	113.518	115.889	0.138691	0.894671
alg12	ENSDARG00000041199	569494	174.301	95.9432	147.646	102.672	131.286	166.405	-0.0618329	0.955679
alg14	ENSDARG00000103093	450072	85.17	50.4444	57.4728	40.4766	43.433	71.3162	-0.314955	0.791377
alg2	ENSDARG00000070399	403068	244.616	197.821	125.846	165.855	167.809	120.841	-0.322288	0.66732
alg3	ENSDARG00000053155	553725	272.346	167.159	160.527	201.396	253.688	293.189	0.31851	0.634934
alg5	ENSDARG00000021938	445564	412.975	352.121	340.873	545.94	451.111	533.881	0.469093	0.0898321
alg6	ENSDARG00000017617	445327	46.5464	77.1502	33.691	71.0808	58.2397	54.4777	0.223772	0.869988
alg8	ENSDARG00000044627	327601	113.89	129.573	97.1092	108.596	109.57	152.538	0.12224	0.898561
alg9	ENSDARG00000012840	393598	228.77	203.756	176.382	143.149	178.668	146.594	-0.378439	0.433993
alk	ENSDARG00000095833	563509	4.95174	5.93463	2.97273	0	14.8067	14.8575	1.09779	0.754699
alkal2a	ENSDARG00000091073		9.90348	0	1.98182	2.9617	0	0	-2.0043	1
alkal2b	ENSDARG00000042815	100329254	0	0	0	7.89787	0	0	3.8535	1
alkbh1	ENSDARG00000071164	553720	43.5753	23.7385	12.8818	9.87234	16.7809	29.7151	-0.508772	0.798435
alkbh2	ENSDARG00000059856	569291	0.990348	21.7603	5.94546	4.93617	12.8325	12.8765	0.0946666	0.981552
alkbh3	ENSDARG00000045606	792266	99.0348	31.6514	62.4274	32.5787	64.1624	49.5252	-0.400828	0.77246
alkbh4	ENSDARG00000052247	553475	13.8649	14.8366	24.7728	33.566	22.7036	15.8481	0.43162	0.814142
alkbh5	ENSDARG00000063003	570158	149.543	160.235	256.646	169.804	162.874	235.74	0.00505483	0.996602
alkbh6	ENSDARG00000077253	317736	41.5946	40.5533	35.6728	42.4511	35.5361	29.7151	-0.129502	0.930772
alkbh7	ENSDARG00000037906	550272	19.807	25.7167	15.8546	15.7957	22.7036	21.7911	-0.0258585	0.989299
alkbh8	ENSDARG00000060256	556362	72.2954	49.4553	66.391	98.7234	67.1237	85.1833	0.416061	0.617295
alms1	ENSDARG00000074779	561882	1456.8	1762.59	2197.84	1381.14	1662.3	2041.43	-0.0913493	0.886636
alox12	ENSDARG00000069463	322732	386.236	788.317	441.946	375.149	444.201	517.043	-0.274549	0.685991
alox5a	ENSDARG00000057273	567204	161.427	85.0631	124.855	639.728	395.833	323.895	1.87223	5.94869e-07
alox5ap	ENSDARG00000054755	337376	0.990348	0.989105	10.9	108.596	71.0722	49.5252	4.15381	1.04469e-05
ALOXE3	ENSDARG00000073781	794132	3.96139	4.94553	8.91819	5.9234	15.7938	4.95252	0.581449	0.855742
alp3	ENSDARG00000098063	100330410	0.990348	15.8257	3.96364	10.8596	22.7036	10.8955	1.09718	0.6666
alpi.1	ENSDARG00000015273	541539	75.2665	105.834	79.2728	102.672	131.286	71.3162	0.229559	0.822012
alpi.2	ENSDARG00000053774	574009	5.94209	0	6.93637	0	11.8454	4.95252	0.383424	0.947094
alpk2	ENSDARG00000079637	559835	27.7298	65.2809	35.6728	1.97447	31.5876	50.5157	-0.614135	0.785562
alpk3a	ENSDARG00000078989	100321139	50.5078	19.7821	21.8	5.9234	13.8196	17.8291	-1.2935	0.3233
alpk3b	ENSDARG00000105630	100534893	7.92279	21.7603	5.94546	2.9617	7.89691	15.8481	-0.416094	0.895591
alpl	ENSDARG00000015546	393982	781.385	686.439	691.655	667.37	663.34	546.758	-0.201877	0.582331
als2a	ENSDARG00000075111	557014	233.722	230.462	293.309	301.106	266.521	188.196	-0.00314255	0.999179
als2b	ENSDARG00000076924	100318899	604.113	579.616	570.764	466.962	539.951	587.368	-0.138163	0.752484
alx1	ENSDARG00000062824	565176	294.133	143.42	104.046	939.847	458.021	363.515	1.70142	0.000844622
alx4a	ENSDARG00000088332	100006399	1347.86	1358.04	991.901	2157.11	1510.28	1143.04	0.379501	0.395581
alx4b	ENSDARG00000074442	497424	268.384	269.037	202.146	265.566	263.559	281.303	0.131985	0.835556
alyref	ENSDARG00000077732	560127	600.151	692.374	748.137	652.562	701.838	669.58	-0.01184	0.984557
amacr	ENSDARG00000057435	553653	11.8842	17.8039	19.8182	20.7319	22.7036	5.94302	-0.00357852	0.99967
ambp	ENSDARG00000004296	394093	0	0	9.9091	0	0	20.8006	1.06976	0.890081
ambra1a	ENSDARG00000008322	100332642	837.835	887.227	798.674	771.03	996.985	915.225	0.0884104	0.856593
ambra1b	ENSDARG00000039878	559106	775.443	840.739	905.692	724.63	783.768	893.434	-0.070372	0.889026
amd1	ENSDARG00000043856	792097	702.157	789.306	723.365	1505.53	1230.93	1180.68	0.82261	1.00181e-05
AMDHD1	ENSDARG00000007366	402826	10.8938	7.91284	0.99091	0	6.9098	8.91453	-0.323341	0.947367
amdhd2	ENSDARG00000100376	402981	188.166	102.867	99.091	76.017	35.5361	42.5916	-1.33961	0.0227799
amer1	ENSDARG00000079624	100885784	926.966	860.522	963.165	713.77	1014.75	1135.12	0.0580673	0.927598
amer2	ENSDARG00000075222	100101649	222.828	205.734	167.464	93.7872	131.286	171.357	-0.588366	0.247622
amfra	ENSDARG00000020218	406442	503.097	538.073	556.892	459.064	552.784	529.919	-0.0517423	0.924486
amh	ENSDARG00000014357	493624	12.8745	0	20.8091	5.9234	1.97423	3.96201	-1.50593	0.642691
amigo3	ENSDARG00000074469	100000131	41.5946	26.7058	22.7909	23.6936	23.6907	20.8006	-0.417835	0.782824
ammecr1	ENSDARG00000012892	393553	1071.56	872.391	876.956	915.166	840.034	844.899	-0.117587	0.782101
amn1	ENSDARG00000070478	751744	24.7587	23.7385	40.6273	36.5277	30.6005	29.7151	0.119886	0.94519
amot	ENSDARG00000078335	563421	3574.17	4095.88	3724.83	2484.87	3026.49	2757.56	-0.462616	0.00892514
amotl2a	ENSDARG00000061923	558920	4963.63	3985.11	5143.82	3713.97	3788.54	4241.34	-0.263027	0.312594
amotl2b	ENSDARG00000061948	559784	865.565	814.034	908.665	682.179	569.565	697.314	-0.409214	0.0819721
ampd1	ENSDARG00000033832	393867	19.807	9.89105	5.94546	8.88511	5.92268	27.7341	0.255065	0.93288
ampd2a	ENSDARG00000104491	100330772	197.079	248.265	231.873	356.391	239.869	287.246	0.383617	0.394703
ampd2b	ENSDARG00000029952	571355	70.3147	35.6078	35.6728	42.4511	29.6134	28.7246	-0.490389	0.69316
ampd3a	ENSDARG00000005800	556578	0.990348	1.97821	14.8637	0.987234	7.89691	10.8955	0.149521	0.975472
ampd3b	ENSDARG00000032469	333997	83.1893	83.0848	51.5273	302.094	250.727	149.566	1.68926	5.3718e-05
amph	ENSDARG00000007663	393804	15.8456	31.6514	23.7818	10.8596	20.7294	27.7341	-0.265006	0.899143
amt	ENSDARG00000010862	450000	85.17	76.1611	74.3183	68.1191	74.0335	67.3542	-0.169632	0.865393
anapc1	ENSDARG00000075687	568795	1014.12	1053.4	1003.79	870.74	1188.49	1078.66	0.0309364	0.955125
anapc10	ENSDARG00000090152	798352	17.8263	51.4335	23.7818	95.7617	15.7938	53.4872	0.82685	0.586949
anapc11	ENSDARG00000102531	768140	9.90348	9.89105	6.93637	19.7447	16.7809	6.93352	0.701242	0.747565
anapc13	ENSDARG00000078435	569473	3.96139	18.793	3.96364	22.7064	10.8583	11.886	0.766386	0.759987
anapc15	ENSDARG00000101285	751740	3.96139	25.7167	19.8182	28.6298	18.7552	13.867	0.307453	0.904084
anapc16	ENSDARG00000013822	550576	38.6236	31.6514	20.8091	33.566	24.6778	14.8575	-0.317216	0.859884
anapc2	ENSDARG00000105035	100318335	131.716	147.377	125.846	172.766	141.157	140.651	0.166818	0.82124
anapc4	ENSDARG00000032237	494046	168.359	95.9432	148.637	148.085	158.925	118.86	0.0445354	0.96624
anapc5	ENSDARG00000008461	322854	220.848	107.812	111.973	132.289	121.415	168.386	-0.0620448	0.958491
anapc7	ENSDARG00000063005	558402	474.377	256.178	334.928	362.315	244.804	362.524	-0.135985	0.873971
and1	ENSDARG00000088514	794315	2998.78	4212.6	2300.89	3855.15	4847.72	2659.5	0.256403	0.66837
and2	ENSDARG00000079302	566702	475.367	1345.18	879.928	761.157	901.235	625.008	-0.239505	0.774321
and3	ENSDARG00000056873	561047	174.301	229.472	141.7	284.323	401.755	151.547	0.618813	0.336133
angel1	ENSDARG00000077567	569547	26.7394	17.8039	16.8455	35.5404	32.5748	18.8196	0.502042	0.742709
angel2	ENSDARG00000016743	562704	305.027	135.507	177.373	232	137.209	156.5	-0.233109	0.814687
angpt1	ENSDARG00000030364	114407	589.257	579.616	654.001	644.664	649.521	795.374	0.196972	0.60312
angpt2a	ENSDARG00000014946	101101687	46.5464	45.4988	41.6182	151.047	128.325	177.3	1.77252	1.37029e-06
angpt2b	ENSDARG00000053906	114408	211.935	203.756	182.328	143.149	184.59	152.538	-0.316314	0.538105
angpt4	ENSDARG00000076787	571050	398.12	339.263	314.119	278.4	326.735	599.255	0.195819	0.812156
angptl1a	ENSDARG00000012071	544656	565.489	639.951	630.219	419.574	548.835	450.679	-0.371327	0.211681
angptl2a	ENSDARG00000024030	569092	89.1314	71.2156	81.2547	68.1191	71.0722	77.2593	-0.1586	0.876503
angptl2b	ENSDARG00000068369	503514	174.301	262.113	257.637	194.485	248.753	343.705	0.181182	0.825573
angptl3	ENSDARG00000044365	114421	28.7201	27.6949	32.7	0.987234	25.665	41.6011	-0.384864	0.890081
angptl4	ENSDARG00000035859	492647	1424.12	1768.52	2000.65	1049.43	1433.29	1974.07	-0.220651	0.6983
angptl5	ENSDARG00000056630	566212	205.002	212.658	251.691	189.549	242.83	290.217	0.110403	0.887795
angptl6	ENSDARG00000020265	561927	1.9807	6.92374	8.91819	5.9234	25.665	10.8955	1.25326	0.57735
angptl7	ENSDARG00000027582	450053	238.674	453.01	397.355	539.03	587.333	237.721	0.324892	0.699653
ank1a	ENSDARG00000092143	449796	114.88	151.333	181.337	34.5532	96.7372	118.86	-0.839305	0.266966
ank1b	ENSDARG00000074777	797662	7.92279	27.6949	42.6091	24.6808	22.7036	57.4492	0.422298	0.838716
ank2a	ENSDARG00000009026	568926	33.6718	100.889	157.555	74.0425	56.2655	88.1548	-0.419166	0.754178
ank2b	ENSDARG00000043313	450043	410.004	691.385	919.565	521.26	938.745	942.959	0.249776	0.752484
ank3a	ENSDARG00000061736	103909035	736.819	1285.84	1122.7	298.145	729.477	701.276	-0.86338	0.0570832
ank3b	ENSDARG00000077582		116.861	177.05	197.191	151.047	235.92	209.987	0.281591	0.70436
ankar	ENSDARG00000000516	368636	0	1.97821	1.98182	0	5.92268	11.886	2.16884	0.627328
ankdd1a	ENSDARG00000098647	569271	101.016	58.3572	40.6273	53.3106	35.5361	27.7341	-0.77861	0.423535
ankdd1b	ENSDARG00000025866	562681	0.990348	5.93463	10.9	0	10.8583	8.91453	0.14959	0.976087
ankef1a	ENSDARG00000019135	566413	16.8359	28.6841	12.8818	17.7702	15.7938	5.94302	-0.563795	0.787185
ankef1b	ENSDARG00000060211	100149106	36.6429	37.586	27.7455	49.3617	58.2397	90.1358	0.955291	0.190319
ANKFN1	ENSDARG00000060941	100333998	282.249	285.851	291.328	163.881	246.778	203.053	-0.485811	0.20286
ankfy1	ENSDARG00000061013	568480	2736.33	1985.13	2040.28	1494.67	1294.11	1220.3	-0.754121	0.000345874
ankhb	ENSDARG00000014969	323738	68.334	39.5642	22.7909	28.6298	43.433	46.5537	-0.139875	0.937862
ankhd1	ENSDARG00000077860	563327	4788.33	4286.78	4338.21	4921.36	4416.35	4338.4	0.0279935	0.945993
ankib1a	ENSDARG00000060768	566524	687.302	644.897	655.983	605.174	730.464	663.637	0.00803063	0.987604
ankib1b	ENSDARG00000076829	561277	593.219	690.395	584.637	569.634	597.204	515.062	-0.151592	0.715993
ankk1	ENSDARG00000056921	100170831	14.8552	45.4988	24.7728	4.93617	28.6263	30.7056	-0.405613	0.863113
ankle2	ENSDARG00000035607	559297	221.838	224.527	235.837	279.387	218.152	209.987	0.0526071	0.944804
ankmy1	ENSDARG00000062702	568987	0	10.8802	8.91819	0	7.89691	12.8765	0.0692353	0.989116
ankmy2a	ENSDARG00000005948	334389	255.51	181.995	250.7	253.719	249.74	195.129	0.0216429	0.979761
ankra2	ENSDARG00000035399	406403	97.0541	68.2483	115.937	83.9149	62.1882	78.2498	-0.326012	0.71396
ankrd10a	ENSDARG00000037100	393955	138.649	177.05	141.7	150.06	192.487	241.683	0.353034	0.558803
ankrd10b	ENSDARG00000004771	559527	70.3147	111.769	111.973	89.8383	148.067	127.775	0.314478	0.714281
ankrd11	ENSDARG00000051886	327352	3819.77	4323.38	4368.92	4019.03	3942.53	4124.46	-0.0499834	0.894916
ankrd12	ENSDARG00000052419	393119	2224.32	2095.91	1965.97	2174.88	2186.46	2016.66	0.0209177	0.961421
ankrd13a	ENSDARG00000061901	556837	455.56	358.056	385.464	363.302	379.052	361.534	-0.119327	0.822065
ankrd13b	ENSDARG00000014652	568981	70.3147	84.0739	91.1638	64.1702	66.1366	99.0503	-0.0985002	0.932533
ankrd13c	ENSDARG00000103831	325167	508.049	387.729	355.737	461.038	366.219	514.071	0.0999723	0.886744
ankrd13d	ENSDARG00000098140	562931	13.8649	23.7385	3.96364	13.8213	9.87114	8.91453	-0.350295	0.901342
ankrd16	ENSDARG00000003822	550225	12.8745	46.4879	41.6182	55.2851	36.5232	61.4112	0.601471	0.654268
ankrd1b	ENSDARG00000076192	564159	0	15.8257	1.98182	0	6.9098	7.92403	-0.263761	0.965343
ankrd22	ENSDARG00000002298	393244	12.8745	13.8475	7.92728	14.8085	14.8067	17.8291	0.453331	0.832037
ankrd24	ENSDARG00000062103	565326	173.311	205.734	231.873	86.8766	80.9433	82.2118	-1.28886	4.24044e-05
ankrd27	ENSDARG00000089207	386887	208.964	239.363	271.509	237.923	227.036	238.711	-0.0327673	0.965098
ankrd28b	ENSDARG00000009023	560747	617.977	539.062	764.983	853.957	669.263	791.412	0.268164	0.500843
ankrd33ab	ENSDARG00000002508	569518	0	11.8693	0.99091	3.94894	4.93557	0.990503	-0.381035	0.948579
ankrd33ba	ENSDARG00000058357	568270	9.90348	15.8257	9.9091	19.7447	14.8067	5.94302	0.18439	0.946914
ankrd34ba	ENSDARG00000077086	560938	7.92279	19.7821	32.7	12.834	26.6521	39.6201	0.389071	0.861247
ankrd34bb	ENSDARG00000061641	565548	7.92279	7.91284	6.93637	22.7064	21.7165	34.6676	1.79616	0.0860539
ankrd37	ENSDARG00000056376	793783	66.3533	27.6949	72.3365	47.3872	34.549	82.2118	-0.0195654	0.990111
ankrd39	ENSDARG00000041350	100000333	12.8745	12.8584	7.92728	12.834	4.93557	8.91453	-0.335092	0.904159
ankrd40	ENSDARG00000076490	100005118	223.819	224.527	169.446	202.383	162.874	166.405	-0.216612	0.731156
ankrd44	ENSDARG00000026028	561373	220.848	160.235	222.955	403.779	432.356	289.227	0.897717	0.00512781
ankrd45	ENSDARG00000011326	553808	0	14.8366	2.97273	4.93617	4.93557	4.95252	-0.264784	0.956774
ankrd46a	ENSDARG00000044328	100329397	104.977	125.616	110.982	126.366	121.415	77.2593	-0.0715353	0.946007
ankrd46b	ENSDARG00000015780	402888	25.7491	28.6841	43.6001	58.2468	28.6263	77.2593	0.743479	0.492523
ankrd49	ENSDARG00000023508	550246	50.5078	32.6405	27.7455	38.5021	54.2913	25.7531	0.0963497	0.955789
ANKRD50	ENSDARG00000045666		755.636	608.3	756.065	780.902	829.176	890.462	0.238176	0.47103
ankrd50l	ENSDARG00000007077	449857	1127.02	958.443	874.974	775.966	771.923	745.849	-0.368106	0.135134
ankrd52a	ENSDARG00000036826	553206	1022.04	1164.18	1226.75	1048.44	1537.92	1479.81	0.252645	0.513403
ankrd54	ENSDARG00000055743	436851	106.958	104.845	137.737	175.728	133.26	115.889	0.281636	0.703136
ankrd6b	ENSDARG00000029370	378477	333.747	509.389	602.474	543.966	450.124	620.055	0.159083	0.82124
ankrd9	ENSDARG00000028804	492328	13.8649	8.90195	1.98182	0.987234	5.92268	3.96201	-1.18679	0.708106
anks1aa	ENSDARG00000062396	100334911	161.427	152.322	127.827	154.009	148.067	218.901	0.238505	0.736065
anks1ab	ENSDARG00000078901	100003659	218.867	181.006	218.991	41.4638	80.9433	40.6106	-1.9245	1.77173e-06
anks1b	ENSDARG00000003512	565408	1932.17	1946.56	1862.91	810.519	1071.02	1044.98	-0.972284	2.74444e-08
anks3	ENSDARG00000038557	100136846	188.166	181.006	165.482	150.06	206.307	164.424	-0.0378967	0.965005
anks4b	ENSDARG00000036846	431735	14.8552	0	6.93637	2.9617	3.94846	8.91453	-0.461678	0.917851
ankzf1	ENSDARG00000041904	553307	127.755	117.704	110.982	130.315	138.196	147.585	0.223238	0.738043
anln	ENSDARG00000060917	562517	3521.68	3668.59	4020.12	2470.06	2859.67	2770.44	-0.468814	0.00456441
ano1	ENSDARG00000102335	407698	155.485	124.627	110.982	22.7064	60.2139	15.8481	-1.98525	0.00145467
ano10a	ENSDARG00000057736	566425	297.105	238.374	175.391	228.051	206.307	202.063	-0.159605	0.832037
ano10b	ENSDARG00000018159	565195	315.921	298.71	288.355	104.647	194.461	164.424	-0.962045	0.00602986
ano2	ENSDARG00000101363	566373	7.92279	5.93463	25.7637	19.7447	14.8067	12.8765	0.259593	0.923523
ano3	ENSDARG00000058015	553392	111.909	146.388	151.609	25.6681	81.9304	76.2688	-1.15667	0.0702677
ano5a	ENSDARG00000015731	100534737	660.562	563.79	525.183	365.277	461.969	385.306	-0.528918	0.0482714
ano5b	ENSDARG00000036147	560102	550.634	556.866	517.255	569.634	547.848	564.587	0.0500102	0.918894
ano6	ENSDARG00000061544	100535437	526.865	506.422	430.055	507.438	534.029	451.67	0.029087	0.962017
ANO7	ENSDARG00000104834	556876	10.8938	2.96732	20.8091	40.4766	70.0851	55.4682	2.25983	0.0124209
ano8a	ENSDARG00000076265	562947	13.8649	2.96732	2.97273	0	4.93557	0	-2.00415	0.641211
ano8b	ENSDARG00000077229	562782	57.4402	62.3136	52.5183	51.3362	87.8531	67.3542	0.261752	0.808206
ano9a	ENSDARG00000078941	100126106	4671.47	2746.75	2621.95	3150.26	2300.96	2335.61	-0.366673	0.411359
ano9b	ENSDARG00000079324	559809	15.8456	73.1938	55.491	19.7447	42.4459	52.4967	-0.333738	0.861659
anos1a	ENSDARG00000012896	30630	189.157	113.747	198.182	66.1447	80.9433	147.585	-0.766004	0.235479
anos1b	ENSDARG00000004932	30652	384.255	988.116	898.756	125.379	234.933	298.141	-1.78628	5.06066e-05
anp32a	ENSDARG00000006487	335907	2366.93	1869.41	1836.16	2905.43	1756.08	1847.29	0.100104	0.880576
anp32b	ENSDARG00000023330	322000	976.484	1003.94	879.928	1441.36	992.049	1003.38	0.264873	0.494282
anp32e	ENSDARG00000054804	406562	1307.26	1077.14	879.928	1612.15	1324.71	1118.28	0.312972	0.423535
ANPEP	ENSDARG00000097285	100004744	24.7587	11.8693	30.7182	73.0553	50.3428	95.0883	1.69792	0.0137729
antxr1a	ENSDARG00000025672	793153	25.7491	15.8257	16.8455	25.6681	38.4974	14.8575	0.435913	0.807397
antxr1b	ENSDARG00000074075	556289	0.990348	7.91284	12.8818	12.834	8.88402	1.98101	0.121658	0.976542
antxr1c	ENSDARG00000063612	563907	2075.77	2330.33	2301.88	1624.99	1864.66	1881.96	-0.320531	0.11915
antxr1d	ENSDARG00000060845	563132	22.778	39.5642	40.6273	8.88511	22.7036	27.7341	-0.795668	0.563521
antxr2a	ENSDARG00000104118	557239	510.029	540.051	479.601	606.162	610.036	507.138	0.171984	0.671512
antxr2b	ENSDARG00000063011	560841	0	0	0	8.88511	0.987114	3.96201	4.6622	1
anxa11a	ENSDARG00000077383	368215	783.366	409.49	441.946	618.008	462.956	417.002	-0.126097	0.8852
anxa11b	ENSDARG00000002632	353365	841.796	701.276	674.81	999.081	787.717	601.236	0.106655	0.871426
anxa13	ENSDARG00000013976	81880	577.373	512.357	417.173	346.519	288.237	307.056	-0.678076	0.010956
anxa13l	ENSDARG00000013613	554118	107.948	70.2265	119.9	36.5277	36.5232	28.7246	-1.5502	0.00199162
anxa1a	ENSDARG00000026726	334724	312.95	430.261	243.764	146.111	155.964	144.613	-1.14375	0.000430156
anxa1b	ENSDARG00000100095	353358	173.311	273.982	84.2274	32.5787	104.634	61.4112	-1.42009	0.045463
anxa1c	ENSDARG00000104359	494158	445.657	938.661	471.673	125.379	384.974	272.388	-1.24559	0.0159285
ANXA1oneOfMany	ENSDARG00000098481	550268	99.0348	96.9323	43.6001	17.7702	41.4588	41.6011	-1.24857	0.111183
anxa2a	ENSDARG00000003216	325557	254.52	521.258	301.237	89.8383	148.067	183.243	-1.35469	0.00190017
anxa3a	ENSDARG00000009196	447893	113.89	271.015	138.727	47.3872	126.351	93.1073	-0.972571	0.168547
anxa3b	ENSDARG00000044254	492336	399.11	261.124	360.691	366.264	235.92	351.629	-0.0981019	0.904084
anxa4	ENSDARG00000036456	353362	273.336	244.309	232.864	414.638	231.972	203.053	0.179046	0.835567
anxa5b	ENSDARG00000016470	337132	273.336	197.821	147.646	136.238	155.964	101.031	-0.654058	0.215504
anxa6	ENSDARG00000013335	353363	60.4113	129.573	44.591	0	38.4974	43.5821	-1.51497	0.685358
aoc2	ENSDARG00000014646	541429	403.072	510.378	495.455	607.149	486.647	491.29	0.169991	0.723882
aox5	ENSDARG00000071475	64265	21.7877	7.91284	9.9091	0.987234	6.9098	25.7531	-0.235435	0.948579
aox6	ENSDARG00000020054	570457	112.9	103.856	112.964	76.017	77.982	60.4207	-0.620748	0.232542
ap1ar	ENSDARG00000031496	100332265	226.79	261.124	156.564	219.166	234.933	206.025	0.0345973	0.969709
ap1b1	ENSDARG00000020621	562166	2314.44	2028.65	1945.16	912.204	824.24	760.707	-1.33237	1.29219e-16
ap1g1	ENSDARG00000102394	324466	550.634	636.984	692.646	824.34	676.173	733.963	0.249004	0.470805
ap1g2	ENSDARG00000054337	100007877	205.002	172.104	128.818	176.715	119.441	117.87	-0.289186	0.700313
ap1m1	ENSDARG00000096249	100330411	1037.89	967.345	902.719	1106.69	771.923	705.238	-0.170469	0.739828
ap1m2	ENSDARG00000096454	403021	24.7587	23.7385	16.8455	6.91064	23.6907	13.867	-0.555235	0.772817
ap1m3	ENSDARG00000039512	445244	6.93244	49.4553	15.8546	25.6681	28.6263	28.7246	0.200519	0.935144
ap1s1	ENSDARG00000056803	393279	72.2954	67.2592	71.3455	77.0043	65.1495	49.5252	-0.137806	0.904395
ap1s2	ENSDARG00000058504	327237	783.366	519.28	544.01	672.306	563.642	549.729	-0.0484338	0.945238
ap1s3a	ENSDARG00000110439	550415	17.8263	0	0	0.987234	0	0.990503	-3.1723	0.568304
ap1s3b	ENSDARG00000027966	447897	126.765	111.769	93.1456	22.7064	11.8454	24.7626	-2.48348	4.90046e-07
ap2a1	ENSDARG00000054320	558153	4286.23	3400.54	3246.22	2902.47	2613.88	2412.87	-0.463436	0.0324557
ap2b1	ENSDARG00000035152	334632	1696.47	1173.08	1232.69	1509.48	1248.7	1275.77	-0.0242146	0.970142
ap2m1a	ENSDARG00000002790	321051	1830.16	1496.52	1446.73	1104.71	940.719	823.108	-0.734691	0.000505529
ap2m1b	ENSDARG00000033899	394001	813.076	652.809	771.919	715.745	676.173	584.397	-0.179253	0.659305
ap2s1	ENSDARG00000026967	100148085	504.087	363.991	323.037	351.455	274.418	259.512	-0.427921	0.327134
ap3b1a	ENSDARG00000100082	563316	637.784	676.548	655.983	562.723	488.621	548.739	-0.300286	0.26407
AP3B2	ENSDARG00000105296	100000165	36.6429	23.7385	86.2092	24.6808	50.3428	36.6486	-0.392474	0.813541
ap3d1	ENSDARG00000071424	563359	1708.35	1637.96	1860.93	1705.94	1473.76	1533.3	-0.143869	0.655739
ap3m1	ENSDARG00000029928	266798	202.031	176.061	129.809	156.97	182.616	123.813	-0.132266	0.885052
ap3m2	ENSDARG00000016128	415244	54.4692	64.2918	77.291	92.8	89.8274	118.86	0.620837	0.30095
ap3s2	ENSDARG00000039882	436812	54.4692	50.4444	28.7364	36.5277	39.4846	27.7341	-0.365369	0.782505
ap4b1	ENSDARG00000013726	393309	53.4788	86.0522	78.2819	87.8638	90.8145	79.2403	0.24383	0.799257
ap4e1	ENSDARG00000103684	570467	178.263	166.17	115.937	195.472	176.693	185.224	0.275882	0.661363
ap4m1	ENSDARG00000056871	436945	36.6429	38.5751	50.5364	50.3489	51.3299	63.3922	0.392461	0.700313
ap4s1	ENSDARG00000054220	368852	0.990348	0.989105	16.8455	14.8085	15.7938	19.8101	1.42127	0.570529
ap5b1	ENSDARG00000078805	100148772	131.716	125.616	114.946	118.468	110.557	134.708	-0.0335327	0.972418
ap5m1	ENSDARG00000031533	553681	47.5367	11.8693	21.8	34.5532	9.87114	11.886	-0.528094	0.808206
ap5s1	ENSDARG00000076755	556111	50.5078	49.4553	63.4183	57.2596	53.3041	44.5726	-0.0746514	0.955125
ap5z1	ENSDARG00000078111	100537934	103.987	99.8996	93.1456	62.1957	71.0722	69.3352	-0.551971	0.328221
apaf1	ENSDARG00000021239	58131	224.809	306.623	285.382	284.323	331.67	250.597	0.085358	0.905909
apba1a	ENSDARG00000103848	100003938	84.1796	53.4117	65.4001	110.57	115.492	82.2118	0.602852	0.344323
apba1b	ENSDARG00000074328	565507	7.92279	14.8366	34.6819	18.7574	53.3041	46.5537	1.04616	0.457698
apba2a	ENSDARG00000063314	100330365	24.7587	35.6078	63.4183	47.3872	52.317	91.1263	0.624428	0.57666
apba2b	ENSDARG00000060639	327160	28.7201	51.4335	40.6273	12.834	44.4201	58.4397	-0.0621717	0.976087
APBA3	ENSDARG00000090675	449850	279.278	214.636	253.673	307.03	282.315	351.629	0.331903	0.428284
apbb1	ENSDARG00000076560	565164	738.8	868.434	922.538	750.298	870.634	777.545	-0.0768848	0.878994
apbb1ip	ENSDARG00000016505	393607	22.778	54.4008	72.3365	380.085	275.405	148.575	2.42705	5.16761e-06
apbb2b	ENSDARG00000099995	564990	2089.64	1831.82	1946.15	1395.95	1674.15	1732.39	-0.288995	0.239834
apbb3	ENSDARG00000053771	101883158	1.9807	18.793	1.98182	5.9234	6.9098	8.91453	-0.0655345	0.987457
apc	ENSDARG00000058868	386762	6286.73	5935.62	5654.13	4469.21	4735.19	4469.15	-0.386675	0.00939246
apc2	ENSDARG00000063007	565771	46.5464	87.0413	198.182	85.8894	94.7629	140.651	-0.0462526	0.978046
apcdd1l	ENSDARG00000075557	100001408	175.292	248.265	165.482	118.468	112.531	172.348	-0.54641	0.301483
apeh	ENSDARG00000008703	100333019	169.35	116.714	127.827	115.506	134.247	110.936	-0.198465	0.802609
apela	ENSDARG00000094729	100536023	41.5946	23.7385	31.7091	79.966	94.7629	79.2403	1.38802	0.00900714
apex1	ENSDARG00000045843	406730	710.08	410.479	456.81	788.8	537.977	628.97	0.310206	0.569674
apex2	ENSDARG00000008472	393115	71.3051	46.4879	26.7546	26.6553	61.2011	67.3542	0.102631	0.955125
aph1b	ENSDARG00000005612	386808	217.877	152.322	157.555	138.213	172.745	110.936	-0.322939	0.635478
api5	ENSDARG00000033597	321676	1022.04	856.565	926.501	1349.55	938.745	1016.26	0.236405	0.549977
apip	ENSDARG00000003132	447941	217.877	138.475	109.991	225.089	120.428	89.1453	-0.101459	0.939258
apln	ENSDARG00000053279	798375	960.638	965.367	1206.93	2421.68	2195.34	2393.06	1.16192	1.6672e-12
aplnr2	ENSDARG00000004447	793710	125.774	246.287	183.318	152.034	295.147	225.835	0.277153	0.750945
aplnra	ENSDARG00000002172	561935	1648.93	927.781	863.083	274.451	201.371	303.094	-2.1428	2.9268e-12
aplnrb	ENSDARG00000036670	565492	1523.16	1229.46	1323.86	381.072	468.879	299.132	-1.8268	7.52242e-17
aplp1	ENSDARG00000098368	404233	97.0541	102.867	194.218	45.4128	76.0078	120.841	-0.702192	0.401812
aplp2	ENSDARG00000054864	796801	5569.72	4768.48	4616.65	2178.83	2363.15	2329.66	-1.12189	4.52811e-15
apmap	ENSDARG00000017422	266637	648.678	533.128	524.192	642.689	732.438	687.409	0.273806	0.390772
apnl	ENSDARG00000090900	100002992	12.8745	6.92374	0.99091	0	0.987114	5.94302	-1.58541	0.695435
apoa1a	ENSDARG00000012076	30355	34.6622	6.92374	21.8	13.8213	14.8067	9.90503	-0.71796	0.717133
apoa1b	ENSDARG00000101324	100101640	0	22.7494	32.7	5.9234	22.7036	40.6106	0.320331	0.92931
apoa4b.2	ENSDARG00000020866	570354	0	0	13.8727	0	0	0	-4.66882	1
apoba	ENSDARG00000042780	566465	124.784	67.2592	66.391	17.7702	48.3686	40.6106	-1.27559	0.0857943
apobb.1	ENSDARG00000022767	321166	365.439	132.54	257.637	75.0298	110.557	158.481	-1.135	0.0459503
apobb.2	ENSDARG00000075016	100330435	38.6236	13.8475	8.91819	5.9234	7.89691	32.6866	-0.400725	0.888963
apobec2a	ENSDARG00000018881	503736	34.6622	9.89105	0	0	4.93557	2.97151	-2.49434	0.431668
apoc1	ENSDARG00000092170	570638	1.9807	5.93463	0	14.8085	12.8325	6.93352	2.12674	0.370502
apoda.1	ENSDARG00000060345	767642	0	0	3.96364	7.89787	8.88402	3.96201	2.38819	0.511809
apodb	ENSDARG00000057437	567972	12.8745	47.4771	23.7818	13.8213	11.8454	11.886	-1.16379	0.391298
apoeb	ENSDARG00000040295	30314	1121.07	1211.65	773.901	390.945	486.647	264.464	-1.44369	9.45579e-07
apof	ENSDARG00000090980	793418	181.234	197.821	291.328	253.719	307.98	165.414	0.117237	0.903316
apol1	ENSDARG00000007425	560340	53.4788	28.6841	21.8	85.8894	50.3428	83.2023	1.0777	0.170286
apooa	ENSDARG00000104696	641319	53.4788	25.7167	23.7818	38.5021	52.317	10.8955	-0.0176916	0.993503
apoob	ENSDARG00000026444	449837	91.1121	31.6514	35.6728	47.3872	51.3299	45.5632	-0.135003	0.936813
apool	ENSDARG00000039374	541537	247.587	270.026	335.919	335.66	294.16	310.028	0.138992	0.816449
apopt1	ENSDARG00000092473	798687	95.0735	42.5315	58.4637	85.8894	72.0593	38.6296	0.00382501	0.99967
appa	ENSDARG00000104279	58083	3443.44	2836.75	3567.28	2422.67	2603.02	3128.01	-0.272301	0.343144
appb	ENSDARG00000055543	170846	3218.63	2944.57	3251.18	2541.14	2631.65	2358.39	-0.321986	0.0726142
appbp2	ENSDARG00000007566	322995	586.286	479.716	508.337	431.421	519.222	545.767	-0.0732491	0.900127
appl2	ENSDARG00000078139	100000135	839.815	645.886	762.01	781.889	766.987	744.858	0.0292511	0.956985
aprt	ENSDARG00000003519	393641	49.5174	45.4988	47.5637	181.651	89.8274	93.1073	1.35452	0.0100457
aptx	ENSDARG00000027143	405797	36.6429	40.5533	26.7546	48.3745	44.4201	27.7341	0.213521	0.890197
aqp10a	ENSDARG00000007086	436621	0	0	0.99091	5.9234	19.7423	0.990503	4.64673	0.140395
aqp11	ENSDARG00000100555	553476	196.089	204.745	179.355	169.804	191.5	197.11	-0.0552061	0.941698
aqp1a.1	ENSDARG00000023713	335821	1994.56	1392.66	1315.93	3405.96	2777.74	1902.76	0.781884	0.0111576
aqp3a	ENSDARG00000003808	406777	244.616	534.117	387.446	630.843	595.23	428.888	0.505009	0.326129
aqp3b	ENSDARG00000069518	568049	0	0	0	9.87234	19.7423	7.92403	6.10238	0.00710531
aqp4	ENSDARG00000010565	445293	49.5174	29.6732	3.96364	22.7064	17.768	19.8101	-0.46402	0.84782
aqp7	ENSDARG00000026787	334529	263.433	284.862	350.782	81.9404	70.0851	74.2877	-1.99011	1.15878e-12
aqp8a.1	ENSDARG00000045141	447923	497.155	390.697	217.009	2723.78	2084.78	775.564	2.33747	0.00325942
aqp8b	ENSDARG00000089749	555598	22.778	11.8693	5.94546	0	4.93557	0.990503	-2.77577	0.207527
aqp9b	ENSDARG00000053480	570191	0.990348	4.94553	8.91819	26.6553	6.9098	7.92403	1.48198	0.528324
aqr	ENSDARG00000016775	393436	660.562	551.921	640.128	850.996	808.446	731.982	0.368325	0.145187
ar	ENSDARG00000067976	100005148	5.94209	24.7276	45.5819	89.8383	86.866	64.3827	1.66076	0.0630034
araf	ENSDARG00000054533	403063	1019.07	1069.22	988.929	1046.47	1101.62	1131.15	0.0917283	0.803931
arap1a	ENSDARG00000062221	571767	37.6332	88.0304	50.5364	24.6808	53.3041	35.6581	-0.632718	0.57735
arap3	ENSDARG00000076801	558931	4280.29	3753.65	3395.85	1870.81	1997.92	1819.55	-1.00673	5.66218e-11
arcn1a	ENSDARG00000002792	266982	972.522	867.445	764.983	1118.54	932.823	715.143	0.0868192	0.890845
arcn1b	ENSDARG00000031214	399661	669.476	547.964	559.864	679.217	575.487	469.499	-0.0437414	0.947367
areg	ENSDARG00000076853	101884611	6.93244	3.95642	0	11.8468	10.8583	4.95252	1.34482	0.663989
AREL1	ENSDARG00000100359	100332031	357.516	327.394	369.61	385.021	457.034	449.689	0.292734	0.395504
arf1	ENSDARG00000009484	114428	1373.61	1261.11	1109.82	1145.19	1003.89	890.462	-0.300924	0.299431
arf2a	ENSDARG00000014763	399477	2116.37	1561.8	1363.49	1984.34	1472.77	1101.44	-0.145317	0.832769
arf2b	ENSDARG00000016393	327026	855.661	696.33	706.519	757.208	596.217	341.724	-0.413937	0.424166
arf3b	ENSDARG00000036998	368822	0.990348	6.92374	7.92728	5.9234	6.9098	12.8765	0.698504	0.832648
arf4a	ENSDARG00000045989	445196	378.313	310.579	251.691	331.711	334.632	273.379	-0.00130971	0.99967
arf5	ENSDARG00000070472	378724	1085.42	963.389	878.938	1229.11	1004.88	817.165	0.0595744	0.922846
arf6a	ENSDARG00000101626	336063	462.493	450.043	364.655	373.174	343.516	318.942	-0.302456	0.41464
arf6b	ENSDARG00000052928	100003206	642.736	634.016	528.155	842.111	591.281	529.919	0.121374	0.85041
arfgap1	ENSDARG00000101616	100149572	350.583	237.385	288.355	242.86	239.869	225.835	-0.306549	0.521563
arfgap2	ENSDARG00000067601	641490	1086.41	1049.44	1006.76	1164.94	1014.75	958.807	-0.00188601	0.999004
arfgap3	ENSDARG00000097583	402889	36.6429	55.3899	11.8909	48.3745	45.4072	33.6771	0.294478	0.873847
arfgef1	ENSDARG00000063474	100329953	1255.76	1506.41	1157.38	1603.27	1599.12	1351.05	0.216269	0.524137
arfgef2	ENSDARG00000074702	100334572	1250.81	1092.96	1232.69	1369.29	1278.31	1326.28	0.152022	0.626223
arfgef3	ENSDARG00000077656	562652	31.6912	27.6949	38.6455	52.3234	67.1237	74.2877	0.982767	0.137589
arfip1	ENSDARG00000070055	100003895	205.992	255.189	193.228	246.808	230.985	242.673	0.138719	0.829502
arfip2a	ENSDARG00000059244	449664	107.948	177.05	204.128	133.277	165.835	191.167	0.0033772	0.99967
arfip2b	ENSDARG00000056664	550342	158.456	151.333	108.009	166.843	181.629	154.519	0.267724	0.682506
arfrp1	ENSDARG00000057857	503602	100.025	71.2156	54.5001	109.583	55.2784	88.1548	0.164549	0.899143
arg2	ENSDARG00000039269	322614	2.97105	15.8257	16.8455	85.8894	81.9304	44.5726	2.57508	0.00126661
arglu1a	ENSDARG00000019223	406834	1820.26	2253.18	2113.61	2042.59	2118.35	2248.44	0.0509269	0.907892
arglu1b	ENSDARG00000018319	393131	473.387	406.522	483.564	513.362	475.789	563.596	0.187532	0.651092
arhgap1	ENSDARG00000024324	550478	483.29	378.827	352.764	438.332	317.851	383.325	-0.0924067	0.893996
arhgap10	ENSDARG00000078326	692277	836.844	1001.96	894.792	505.464	744.284	649.77	-0.525173	0.0521423
arhgap11a	ENSDARG00000100019	406608	756.626	783.371	788.765	731.54	763.039	800.327	-0.0211348	0.965343
arhgap12a	ENSDARG00000008548	563267	160.436	205.734	114.946	95.7617	127.338	107.965	-0.53929	0.346693
arhgap12b	ENSDARG00000026482	393848	376.332	276.949	327.991	405.753	383	447.707	0.333488	0.370144
arhgap15	ENSDARG00000062349	100003547	0.990348	4.94553	2.97273	86.8766	67.1237	49.5252	4.51364	4.48637e-09
arhgap17a	ENSDARG00000020488	550254	537.759	550.932	547.973	352.443	496.518	367.477	-0.428082	0.17301
arhgap17b	ENSDARG00000062263	100141341	338.699	493.564	237.818	249.77	317.851	174.329	-0.528313	0.366963
arhgap18	ENSDARG00000074740	100004252	118.842	128.584	132.782	116.494	93.7758	111.927	-0.238858	0.734327
arhgap19	ENSDARG00000083189	100537002	604.113	444.108	489.51	333.685	371.155	436.812	-0.429695	0.20286
arhgap20	ENSDARG00000089326	796434	14.8552	22.7494	12.8818	8.88511	39.4846	32.6866	0.682955	0.703838
arhgap20b	ENSDARG00000093708		115.871	120.671	143.682	102.672	75.0207	119.851	-0.353787	0.617902
arhgap21a	ENSDARG00000104295	101883923	527.856	417.402	548.964	284.323	412.614	361.534	-0.497408	0.141746
arhgap21b	ENSDARG00000075673	326745	2164.9	1981.18	2088.84	1970.52	2028.52	2240.52	0.00106898	0.99967
arhgap22	ENSDARG00000021255	562503	8.91314	10.8802	7.92728	40.4766	36.5232	51.5062	2.21272	0.0030947
ARHGAP22oneOfMany	ENSDARG00000076434	555573	0.990348	11.8693	34.6819	12.834	25.665	7.92403	-0.0342399	0.991313
arhgap23a	ENSDARG00000052950	100006233	2704.64	3008.86	2750.77	2193.63	2685.94	2243.49	-0.248886	0.317975
arhgap23b	ENSDARG00000026840	562244	0	2.96732	0.99091	12.834	8.88402	14.8575	3.20752	0.107737
arhgap24	ENSDARG00000100973	100005116	171.33	289.808	141.7	187.574	154.977	117.87	-0.388809	0.60815
arhgap25	ENSDARG00000061784	562468	1.9807	28.6841	12.8818	235.949	107.595	100.041	3.34846	3.03989e-05
arhgap27	ENSDARG00000104255	564211	202.031	313.546	179.355	431.421	431.369	297.151	0.739104	0.0653487
arhgap27l	ENSDARG00000061798	566523	1000.25	1220.56	1114.77	582.468	594.243	456.622	-1.0301	1.97359e-07
arhgap28	ENSDARG00000101350		77.2472	132.54	102.064	160.919	197.423	123.813	0.62865	0.261604
arhgap29a	ENSDARG00000026329	564805	1456.8	1434.2	1418.98	877.651	958.488	936.026	-0.636673	2.74444e-05
arhgap29b	ENSDARG00000017748	378998	962.619	742.818	729.31	762.145	754.155	657.694	-0.163414	0.710933
arhgap31	ENSDARG00000059472	101885883	3318.66	2899.07	3168.93	2099.85	2184.48	2528.75	-0.462308	0.00991908
arhgap32a	ENSDARG00000075334	562449	0.990348	9.89105	11.8909	7.89787	16.7809	11.886	0.683179	0.814142
arhgap32b	ENSDARG00000074184	569434	746.723	691.385	951.274	711.796	773.897	867.681	-0.0219084	0.972592
arhgap33	ENSDARG00000011333	569720	464.473	547.964	561.846	752.272	835.098	834.994	0.621716	0.00222024
arhgap35a	ENSDARG00000062577	100004299	5065.63	4490.54	4726.64	3449.4	3755.97	3842.16	-0.370558	0.0246426
arhgap35b	ENSDARG00000060297	564565	1960.89	1894.14	1924.35	1511.46	1662.3	1638.29	-0.264264	0.183063
arhgap36	ENSDARG00000059672	559813	764.549	689.406	738.228	923.064	932.823	765.659	0.258064	0.382389
arhgap39	ENSDARG00000100007	101884459	0	19.7821	11.8909	36.5277	34.549	23.7721	1.58232	0.369359
arhgap42a	ENSDARG00000056619	566275	700.176	782.382	975.056	612.085	788.704	866.69	-0.116176	0.845571
arhgap42b	ENSDARG00000010654	569534	152.514	146.388	135.755	156.97	147.08	196.12	0.202505	0.766058
arhgap44	ENSDARG00000104549	100333556	0	5.93463	8.91819	2.9617	3.94846	13.867	0.484115	0.914641
arhgap4a	ENSDARG00000039265	393416	2.97105	7.91284	40.6273	120.443	76.0078	90.1358	2.47612	0.0110326
arhgap4b	ENSDARG00000015003	561231	197.079	222.549	239.8	588.391	452.098	350.638	1.07699	0.000230821
arhgap5	ENSDARG00000061294	795752	3307.76	3666.61	3384.95	2518.43	3163.7	3356.82	-0.196708	0.535967
ARHGAP6	ENSDARG00000111170		263.433	270.026	280.428	265.566	326.735	267.436	0.0790827	0.902235
arhgdia	ENSDARG00000043795	406770	1721.23	1216.6	1270.35	2099.85	1499.43	1106.39	0.161213	0.808671
arhgdig	ENSDARG00000004034	394132	287.201	367.947	273.491	1486.77	1004.88	707.219	1.78438	3.87921e-09
arhgef10	ENSDARG00000077788	334278	1911.37	2025.69	1937.23	862.843	923.939	865.7	-1.14707	5.92517e-17
arhgef10la	ENSDARG00000088630	799435	310.969	312.557	275.473	303.081	473.815	373.42	0.355636	0.410937
arhgef10lb	ENSDARG00000074244	567649	84.1796	113.747	115.937	153.021	140.17	138.67	0.460437	0.381091
arhgef11	ENSDARG00000052482		1121.07	1212.64	1372.41	1056.34	1148.01	1506.56	0.00184956	0.99967
arhgef12a	ENSDARG00000030532	562455	751.674	729.96	813.537	1125.45	1060.16	869.662	0.412713	0.0874981
arhgef12b	ENSDARG00000100913	571031	3975.26	3412.41	3516.74	2556.94	2747.14	3000.23	-0.392983	0.0334771
arhgef15	ENSDARG00000100293	101882903	2.97105	14.8366	23.7818	17.7702	34.549	9.90503	0.581354	0.815576
arhgef16	ENSDARG00000077114	567180	13.8649	95.9432	86.2092	40.4766	51.3299	69.3352	-0.282691	0.885083
ARHGEF17	ENSDARG00000101644	100002227	952.715	1018.78	962.174	1004.02	1070.03	1042.01	0.0870141	0.818415
arhgef18a	ENSDARG00000011157	407987	280.269	231.451	169.446	143.149	179.655	168.386	-0.471736	0.33728
arhgef18b	ENSDARG00000042308	562264	395.149	410.479	316.1	465.974	458.021	352.619	0.186612	0.722689
arhgef19	ENSDARG00000078853	569202	48.5271	96.9323	68.3728	85.8894	78.9691	57.4492	0.0560933	0.967601
arhgef1a	ENSDARG00000040380	368266	923.995	790.295	859.119	783.864	714.67	542.796	-0.33415	0.313905
arhgef1b	ENSDARG00000055837	557983	1837.1	1527.18	1713.28	2222.26	1846.89	1815.59	0.212851	0.48858
arhgef2	ENSDARG00000075819	561276	1106.22	1041.53	1147.47	1497.63	1339.51	1251.01	0.311083	0.172944
arhgef25b	ENSDARG00000014465	569561	60.4113	157.268	92.1547	48.3745	98.7114	57.4492	-0.599141	0.538199
arhgef28	ENSDARG00000060415	559941	205.002	192.876	175.391	522.247	441.24	529.919	1.38131	1.98087e-10
arhgef3	ENSDARG00000013834	570228	115.871	69.2374	139.718	124.391	140.17	205.034	0.531745	0.448336
arhgef33	ENSDARG00000097964	559216	8.91314	17.8039	12.8818	11.8468	11.8454	22.7816	0.230801	0.925705
arhgef37	ENSDARG00000002463	101883655	335.728	364.98	298.264	219.166	257.637	294.179	-0.373781	0.334763
arhgef38	ENSDARG00000079377	100317614	29.7105	6.92374	11.8909	1.97447	5.92268	13.867	-1.15701	0.617295
arhgef39	ENSDARG00000013476	492469	165.388	153.311	122.873	150.06	162.874	122.822	-0.0191067	0.984801
arhgef3l	ENSDARG00000037554	553761	10.8938	5.93463	23.7818	308.017	207.294	142.632	4.01826	5.63289e-13
arhgef4	ENSDARG00000012914	559017	900.227	1101.86	845.247	1024.75	1046.34	911.263	0.0668381	0.898561
arhgef40	ENSDARG00000078979	100151026	2976.99	2928.74	3036.15	2435.51	2451	2697.14	-0.237689	0.23056
arhgef6	ENSDARG00000006683	558288	404.062	457.956	465.728	802.621	582.397	640.856	0.609569	0.0155956
arhgef7a	ENSDARG00000006299	553493	169.35	182.984	297.273	326.774	310.941	413.04	0.693788	0.0879844
arhgef7b	ENSDARG00000073848	494081	1962.87	2051.4	2143.34	1061.28	1274.36	1251.01	-0.77974	9.15491e-07
arhgef9a	ENSDARG00000061746	559868	8.91314	7.91284	23.7818	10.8596	13.8196	7.92403	-0.316602	0.906394
arhgef9b	ENSDARG00000078624	560923	1291.41	1196.82	1173.24	1006.98	1025.61	958.807	-0.291598	0.174362
arid1aa	ENSDARG00000101710	100141358	4412.99	4270.96	4936.72	5050.69	4633.51	5444.8	0.151518	0.603471
arid1ab	ENSDARG00000101891	568161	4486.28	4499.44	4915.91	5385.36	5380.76	5860.81	0.258267	0.165639
arid1b	ENSDARG00000092503	569589	1271.61	1232.43	1375.38	1202.45	1656.38	1468.92	0.157777	0.692516
arid2	ENSDARG00000007413	566352	1825.21	1692.36	1992.72	2087.01	1982.12	2100.86	0.163142	0.565177
arid3a	ENSDARG00000070843	562799	377.323	534.117	532.119	673.294	556.732	546.758	0.299643	0.464589
arid3b	ENSDARG00000104034	571249	3955.45	3574.63	3771.41	2765.24	2999.84	3240.93	-0.327555	0.0772815
arid3c	ENSDARG00000067729	569444	1393.42	1484.65	1200.98	1261.69	1357.28	1250.02	-0.076281	0.862589
arid4a	ENSDARG00000043873	327404	2040.12	2174.05	2499.08	2341.72	2559.59	2604.03	0.160906	0.60312
arid5a	ENSDARG00000077120	100462698	0.990348	4.94553	8.91819	308.017	120.428	90.1358	5.12576	1.16355e-11
arid5b	ENSDARG00000037196	100536827	571.431	511.367	557.883	364.289	441.24	572.511	-0.251701	0.588281
arid6	ENSDARG00000069988	572528	20.7973	11.8693	15.8546	5.9234	31.5876	18.8196	0.215332	0.933609
arih1	ENSDARG00000003616	327005	438.724	456.967	435.01	483.745	485.66	404.125	0.0457189	0.9364
arih1l	ENSDARG00000036870	405859	234.713	250.244	270.519	302.094	341.541	243.664	0.232067	0.656294
arih2	ENSDARG00000012848	406417	596.19	363.002	465.728	561.736	401.755	374.41	-0.0908889	0.907892
arl1	ENSDARG00000101680	436746	217.877	166.17	172.418	174.74	176.693	139.661	-0.180253	0.796534
arl11	ENSDARG00000036637	324689	15.8456	4.94553	4.95455	3.94894	11.8454	3.96201	-0.381877	0.912185
arl13b	ENSDARG00000012763	286784	162.417	145.398	173.409	180.664	181.629	219.892	0.27475	0.615395
arl14	ENSDARG00000063223	556921	1.9807	4.94553	2.97273	0	4.93557	9.90503	0.583962	0.905909
arl14ep	ENSDARG00000001210	751672	52.4885	74.1829	83.2365	105.634	55.2784	47.5442	-0.00995644	0.994705
arl15a	ENSDARG00000076040	567657	0	1.97821	7.92728	7.89787	0.987114	1.98101	0.133689	0.983686
arl15b	ENSDARG00000057995	560030	149.543	142.431	164.491	184.613	163.861	153.528	0.137216	0.850674
arl16	ENSDARG00000059498	100037345	66.3533	23.7385	24.7728	40.4766	28.6263	42.5916	-0.0403878	0.984801
arl2	ENSDARG00000069496	449774	35.6525	17.8039	46.5728	31.5915	77.982	59.4302	0.75668	0.506627
arl2bp	ENSDARG00000025383	393976	20.7973	26.7058	8.91819	40.4766	40.4717	19.8101	0.836587	0.548049
arl3	ENSDARG00000071409	797451	158.456	213.647	260.609	287.285	170.771	207.015	0.0719707	0.941494
arl4aa	ENSDARG00000099918	393834	227.78	171.115	135.755	86.8766	98.7114	70.3257	-1.0629	0.0104148
arl4ab	ENSDARG00000033182	338267	342.661	277.939	340.873	149.072	103.647	111.927	-1.39872	8.93371e-07
arl4ca	ENSDARG00000057606	550444	32.6815	49.4553	22.7909	228.051	172.745	139.661	2.36472	8.35492e-08
arl4cb	ENSDARG00000032708	406531	192.128	181.006	188.273	184.613	155.964	253.569	0.0817265	0.923553
arl4d	ENSDARG00000045074	323573	134.687	97.9214	91.1638	77.9915	76.0078	103.012	-0.333193	0.674468
arl5a	ENSDARG00000018627	436611	51.4981	57.3681	64.4092	45.4128	73.0464	96.0788	0.30811	0.784368
arl5c	ENSDARG00000035719	393819	113.89	94.9541	136.746	94.7745	113.518	77.2593	-0.275246	0.735715
arl6	ENSDARG00000032056	494134	90.1217	59.3463	47.5637	69.1064	70.0851	52.4967	-0.0396309	0.97689
arl6ip1	ENSDARG00000054578	394087	319.883	329.372	380.51	380.085	345.49	326.866	0.0314432	0.961667
arl6ip4	ENSDARG00000105036	553796	42.585	20.7712	2.97273	9.87234	13.8196	22.7816	-0.513323	0.848773
arl6ip5a	ENSDARG00000077044	450076	16.8359	31.6514	13.8727	14.8085	35.5361	28.7246	0.342419	0.863262
arl6ip5b	ENSDARG00000016238	436790	102.006	95.9432	58.4637	34.5532	52.317	48.5347	-0.921223	0.154173
arl6ip6	ENSDARG00000071013	100037347	70.3147	103.856	104.046	40.4766	96.7372	53.4872	-0.544865	0.553286
arl8	ENSDARG00000094709	327551	469.425	460.923	473.655	493.617	533.041	544.777	0.162531	0.668411
arl8a	ENSDARG00000078686	567222	616.987	540.051	610.401	527.183	367.206	416.011	-0.431643	0.169414
arl8ba	ENSDARG00000006915	337424	171.33	171.115	157.555	150.06	141.157	122.822	-0.272137	0.635912
arl8bb	ENSDARG00000070318	562445	118.842	63.3027	66.391	70.0936	95.75	70.3257	-0.0735994	0.955125
arl9	ENSDARG00000071881	751670	324.834	298.71	337.9	326.774	254.675	337.762	-0.0648191	0.922765
armc1	ENSDARG00000013861	494066	324.834	237.385	164.491	242.86	185.577	184.234	-0.246263	0.748461
armc10	ENSDARG00000062960	557740	116.861	69.2374	82.2456	107.609	92.7887	66.3637	-0.00847632	0.994705
armc1l	ENSDARG00000020887	321240	169.35	124.627	110.982	158.945	123.389	120.841	-0.00634989	0.995032
armc2	ENSDARG00000022660	555846	7.92279	24.7276	34.6819	12.834	37.5103	34.6676	0.336348	0.882163
armc4	ENSDARG00000055128	799229	8.91314	12.8584	7.92728	0	18.7552	15.8481	0.220431	0.955125
armc5	ENSDARG00000078083	569910	329.786	505.433	465.728	307.03	425.446	517.043	-0.0582126	0.945238
ARMC6	ENSDARG00000103770	555425	63.3823	56.379	96.1183	120.443	92.7887	93.1073	0.504948	0.488399
armc7	ENSDARG00000061197	767659	34.6622	11.8693	16.8455	34.5532	18.7552	21.7911	0.244899	0.907664
armc8	ENSDARG00000062258	571528	190.147	145.398	174.4	143.149	126.351	197.11	-0.128166	0.885083
armc9	ENSDARG00000087299	100334308	99.0348	155.29	153.591	122.417	161.887	193.148	0.22705	0.788286
armh3	ENSDARG00000104285	393591	383.265	307.612	322.046	357.379	304.031	352.619	0.0015718	0.99967
armt1	ENSDARG00000055676	541518	98.0445	90.9977	131.791	116.494	125.363	134.708	0.231085	0.769714
arnt	ENSDARG00000021855	493634	341.67	520.269	391.41	415.626	452.098	349.648	-0.0420145	0.955125
arnt2	ENSDARG00000103697	64277	1504.34	1758.63	1958.04	1447.29	1726.46	2057.28	0.00275853	0.997324
arntl1a	ENSDARG00000006791	58098	343.651	234.418	244.755	284.323	245.791	222.863	-0.127954	0.861659
arntl1b	ENSDARG00000035732	352935	371.381	234.418	287.364	307.03	340.554	315.971	0.109456	0.878573
arntl2	ENSDARG00000041381	58099	620.948	656.766	603.464	646.638	614.972	587.368	-0.0249048	0.961667
arpc1a	ENSDARG00000008383	394243	916.072	626.104	413.21	453.14	374.116	293.189	-0.803367	0.0527934
arpc1b	ENSDARG00000027063	335474	340.68	178.039	244.755	1965.58	964.41	813.203	2.29363	1.45951e-09
arpc2	ENSDARG00000075989	327068	1378.57	986.138	906.683	2120.58	1361.23	998.427	0.45368	0.351603
arpc3	ENSDARG00000057882	415204	382.274	251.233	207.1	560.749	409.652	309.037	0.606022	0.219761
arpc4	ENSDARG00000054063	114456	235.703	268.048	237.818	487.694	362.271	278.331	0.605512	0.111
arpc4l	ENSDARG00000058225	445305	401.091	311.568	359.7	633.804	444.201	450.679	0.511518	0.12859
arpc5a	ENSDARG00000039142	336504	839.815	733.916	488.519	995.132	745.271	547.748	0.149971	0.848041
arpc5b	ENSDARG00000019062	399482	221.838	173.093	183.318	561.736	313.902	270.407	0.986922	0.0141119
arpc5la	ENSDARG00000041720	393550	86.1603	72.2047	82.2456	77.0043	76.0078	112.917	0.144294	0.893982
arpc5lb	ENSDARG00000035433	556104	42.585	25.7167	17.8364	24.6808	19.7423	3.96201	-0.831919	0.644115
arpin	ENSDARG00000041085	550477	8.91314	29.6732	25.7637	32.5787	34.549	21.7911	0.466572	0.789375
arpp19a	ENSDARG00000032532	393603	680.369	591.485	556.892	650.587	442.227	497.233	-0.20178	0.678719
arpp19b	ENSDARG00000039880	393947	225.799	210.679	110.982	258.655	163.861	128.765	0.0100497	0.992957
arpp21	ENSDARG00000061081	564134	0.990348	2.96732	16.8455	12.834	9.87114	4.95252	0.41106	0.914475
arr3b	ENSDARG00000098475	796867	0	3.95642	9.9091	0	1.97423	4.95252	-1.0015	0.863516
arrb1	ENSDARG00000043241	553266	243.626	175.072	151.609	194.485	123.389	113.908	-0.401404	0.561814
arrb2a	ENSDARG00000039215	321378	200.05	186.941	221.964	267.54	233.946	269.417	0.340215	0.405801
arrb2b	ENSDARG00000011545	394099	2325.34	1664.66	1592.39	1666.45	1128.27	1097.48	-0.520293	0.116134
arrdc1a	ENSDARG00000068148	100006005	36.6429	51.4335	32.7	16.783	21.7165	41.6011	-0.592621	0.654268
arrdc1b	ENSDARG00000079839	570029	28.7201	46.4879	31.7091	24.6808	27.6392	17.8291	-0.60795	0.622638
arrdc2	ENSDARG00000020761	335206	284.23	304.644	308.173	234.962	241.843	299.132	-0.209277	0.672095
arrdc3a	ENSDARG00000052690	566685	834.864	780.404	636.164	771.03	680.121	765.659	-0.0223657	0.970142
arrdc3b	ENSDARG00000036028	447866	1056.7	794.252	875.965	870.74	685.057	818.156	-0.19998	0.630208
arsa	ENSDARG00000042270	541416	128.745	176.061	135.755	109.583	115.492	71.3162	-0.571789	0.309929
ARSB	ENSDARG00000108788	100538007	120.823	149.355	125.846	461.038	308.967	266.445	1.388	1.7392e-05
arsg	ENSDARG00000101715	564790	55.4595	81.1066	49.5455	61.2085	84.8918	158.481	0.710567	0.399342
arsh	ENSDARG00000002299	100332997	155.485	178.039	126.837	68.1191	85.8789	100.041	-0.857776	0.0479457
arsia	ENSDARG00000077606	100329483	0.990348	3.95642	4.95455	46.4	41.4588	31.6961	3.59394	8.65718e-05
arsib	ENSDARG00000117075	563783	39.6139	19.7821	20.8091	8.88511	28.6263	30.7056	-0.233621	0.914641
arsj	ENSDARG00000077590	559800	119.832	191.886	156.564	126.366	135.235	168.386	-0.123135	0.893996
arsk	ENSDARG00000059714	562412	24.7587	36.5969	47.5637	48.3745	42.4459	37.6391	0.238095	0.871159
artnb	ENSDARG00000093714	101883396	51.4981	27.6949	46.5728	14.8085	20.7294	62.4017	-0.360905	0.849826
arv1	ENSDARG00000074757	568203	66.3533	49.4553	66.391	71.0808	97.7243	76.2688	0.427736	0.593392
arvcfa	ENSDARG00000074329	572216	0.990348	0.989105	6.93637	2.9617	10.8583	1.98101	0.825849	0.856593
arvcfb	ENSDARG00000061688	564669	2966.09	3474.73	3161	1993.23	2505.29	2168.21	-0.526328	0.00421655
arxa	ENSDARG00000058011	30657	5.94209	21.7603	28.7364	12.834	7.89691	24.7626	-0.311153	0.905909
as3mt	ENSDARG00000027572	664699	55.4595	34.6187	15.8546	34.5532	15.7938	28.7246	-0.421951	0.812905
asah1a	ENSDARG00000037091	450068	162.417	164.191	131.791	292.221	335.619	250.597	0.938341	0.00144054
asah1b	ENSDARG00000034817	393549	243.626	128.584	142.691	143.149	142.144	114.898	-0.363572	0.622814
asah2	ENSDARG00000012829	493602	4.95174	46.4879	26.7546	6.91064	7.89691	54.4777	-0.174679	0.956901
asap1a	ENSDARG00000029463	100170829	2271.86	2212.63	1899.58	1539.1	1519.17	1526.37	-0.477671	0.0053428
asap1b	ENSDARG00000039729	565859	2970.05	3151.29	2775.54	1779	1787.66	1543.2	-0.80001	1.00331e-07
asap2a	ENSDARG00000010181	570669	991.339	1017.79	1216.84	639.728	679.134	777.545	-0.621822	0.00276288
asap2b	ENSDARG00000019564	560581	392.178	529.171	348.8	302.094	349.438	298.141	-0.4195	0.277035
asap3	ENSDARG00000021896	664764	848.729	1095.93	1315.93	1063.25	1121.36	1321.33	0.104667	0.859576
asb1	ENSDARG00000026635	554673	5.94209	13.8475	22.7909	0	28.6263	20.8006	0.215094	0.955125
asb12a	ENSDARG00000017086	322927	102.996	94.9541	70.3546	85.8894	57.2526	68.3447	-0.343313	0.69315
asb12b	ENSDARG00000037558	445507	34.6622	2.96732	5.94546	0	4.93557	7.92403	-1.76086	0.545088
asb13a.1	ENSDARG00000079698	436801	2.97105	4.94553	4.95455	0	10.8583	0	-0.245159	0.969801
asb13b	ENSDARG00000089833	556808	0	8.90195	4.95455	10.8596	5.92268	15.8481	1.23548	0.679785
asb15a	ENSDARG00000045633	100151067	0	19.7821	3.96364	2.9617	4.93557	10.8955	-0.337705	0.943752
asb2a.1	ENSDARG00000003797	567986	31.6912	25.7167	9.9091	3.94894	15.7938	12.8765	-1.04531	0.557924
asb2b	ENSDARG00000102490	402848	6.93244	37.586	59.4546	5.9234	29.6134	26.7436	-0.739389	0.72849
asb3	ENSDARG00000005246	334210	89.1314	94.9541	74.3183	89.8383	116.479	110.936	0.295986	0.697247
asb4	ENSDARG00000034988	550321	21.7877	6.92374	21.8	8.88511	9.87114	11.886	-0.721079	0.723842
asb6	ENSDARG00000007125	553600	99.0348	143.42	174.4	143.149	165.835	148.575	0.134423	0.885785
asb7	ENSDARG00000006494	405798	256.5	267.058	285.382	267.54	281.327	309.037	0.0847704	0.890935
asb8	ENSDARG00000003383	327200	111.909	104.845	82.2456	76.017	105.621	85.1833	-0.16427	0.868227
ascc1	ENSDARG00000077760	550273	38.6236	12.8584	25.7637	40.4766	33.5619	31.6961	0.452989	0.770094
ascc2	ENSDARG00000013058	393414	238.674	168.148	198.182	211.268	216.178	241.683	0.145336	0.833116
ascc3	ENSDARG00000086678	100332599	738.8	653.799	616.346	733.515	640.637	567.558	-0.0490969	0.931704
ascl1a	ENSDARG00000038386	30466	0.990348	4.94553	6.93637	14.8085	29.6134	19.8101	2.31907	0.0950978
ascl1b	ENSDARG00000101628	30478	0.990348	6.92374	20.8091	14.8085	21.7165	6.93352	0.597559	0.850291
asf1ba	ENSDARG00000101037	386897	207.973	138.475	126.837	214.23	132.273	129.756	0.00906355	0.992962
asf1bb	ENSDARG00000043713	792029	305.027	154.3	189.264	243.847	178.668	217.911	-0.0182735	0.9871
ash1l	ENSDARG00000070981	563799	4124.8	4575.6	4918.88	4107.88	4634.5	5420.03	0.0564139	0.905328
ash2l	ENSDARG00000060392	558193	494.184	318.492	460.773	450.179	420.51	395.211	-0.00855883	0.989299
asic1a	ENSDARG00000008329	791696	31.6912	21.7603	24.7728	21.7191	27.6392	18.8196	-0.198243	0.912236
asic1b	ENSDARG00000101866	407672	43.5753	48.4662	68.3728	49.3617	32.5748	35.6581	-0.44794	0.67627
asic1c	ENSDARG00000098428	407670	18.8166	17.8039	24.7728	0.987234	4.93557	14.8575	-1.56323	0.382673
asic2	ENSDARG00000006849	407669	0	3.95642	11.8909	0	1.97423	0.990503	-2.4182	1
asic4a	ENSDARG00000025162	407668	3.96139	1.97821	6.93637	0	0.987114	10.8955	-0.116116	0.984801
asip2b	ENSDARG00000114760	796595	82.1989	58.3572	46.5728	41.4638	24.6778	31.6961	-0.935566	0.225665
asl	ENSDARG00000033361	393423	33.6718	20.7712	39.6364	40.4766	23.6907	27.7341	-0.0337308	0.986444
asmt	ENSDARG00000098249	100141344	0	8.90195	3.96364	0	4.93557	10.8955	0.299033	0.960427
asmt2	ENSDARG00000070874	568256	10.8938	33.6296	31.7091	40.4766	37.5103	12.8765	0.25337	0.907049
asmtl	ENSDARG00000021433	324134	21.7877	95.9432	88.191	100.698	80.9433	93.1073	0.416	0.752144
asna1	ENSDARG00000018190	325704	581.335	496.531	461.764	533.106	489.608	323.895	-0.193226	0.742834
asns	ENSDARG00000016375	394138	275.317	173.093	164.491	629.855	482.699	351.629	1.25639	0.000359804
asnsd1	ENSDARG00000000540	110631416	108.938	134.518	92.1547	198.434	105.621	170.367	0.499349	0.442153
aspa	ENSDARG00000005154	557232	25.7491	41.5424	21.8	12.834	22.7036	32.6866	-0.385148	0.830151
aspg	ENSDARG00000052942	100124594	43.5753	70.2265	33.691	37.5149	76.0078	66.3637	0.286385	0.837185
asph	ENSDARG00000055945	323659	3589.02	4168.09	3794.2	3288.48	3344.34	2967.55	-0.266893	0.203398
asphd2	ENSDARG00000059629	569819	405.053	252.222	227.909	249.77	194.461	234.749	-0.382609	0.502603
aspm	ENSDARG00000103754	554173	7981.22	7528.08	8098.71	5236.29	5570.28	5985.61	-0.491488	0.000553859
aspn	ENSDARG00000002192	65228	222.828	189.908	294.3	22.7064	67.1237	51.5062	-2.32267	3.40235e-07
aspscr1	ENSDARG00000105321	550237	139.639	154.3	162.509	185.6	162.874	206.025	0.280708	0.610546
asrgl1	ENSDARG00000021681	541402	6.93244	10.8802	9.9091	5.9234	12.8325	8.91453	-0.00267238	0.99967
ASS1	ENSDARG00000103044		12.8745	22.7494	21.8	8.88511	22.7036	14.8575	-0.306084	0.891704
ASTE1	ENSDARG00000062530	100003699	150.533	110.78	101.073	167.83	125.363	122.822	0.199132	0.815576
aste1a	ENSDARG00000070132	100006826	13.8649	0	13.8727	5.9234	15.7938	9.90503	0.189187	0.962879
astn1	ENSDARG00000068323	791157	6.93244	34.6187	21.8	9.87234	7.89691	44.5726	-0.0233558	0.993503
asxl1	ENSDARG00000036956	403066	3578.13	3502.42	3625.74	3392.14	3353.23	3743.11	-0.0296569	0.93887
asxl2	ENSDARG00000076501	100150267	134.687	158.257	154.582	183.626	256.65	159.471	0.422408	0.430506
atad1a	ENSDARG00000023267	368672	100.025	96.9323	67.3819	61.2085	50.3428	71.3162	-0.531654	0.465703
atad1b	ENSDARG00000056609	368412	147.562	197.821	261.6	242.86	221.113	264.464	0.263146	0.687366
atad2	ENSDARG00000076590		1212.19	1051.42	1146.48	1375.22	1246.72	1143.04	0.142844	0.689893
atad2b	ENSDARG00000060537	100331225	2487.76	3072.16	2628.89	2606.3	3009.71	2437.63	-0.0240103	0.962593
atad3	ENSDARG00000086848	403004	70.3147	89.0195	105.037	123.404	78.9691	62.4017	0.00225968	0.99967
atad5a	ENSDARG00000070568	560591	1321.12	1302.65	1341.69	1513.43	1573.46	1749.23	0.286352	0.175805
atad5b	ENSDARG00000101126	321619	300.076	390.697	387.446	363.302	433.343	517.043	0.284952	0.535959
atat1	ENSDARG00000004472	406389	111.909	119.682	109	88.8511	116.479	86.1738	-0.2245	0.780062
atcayb	ENSDARG00000059781	100329872	0	11.8693	15.8546	16.783	11.8454	6.93352	0.359266	0.924171
ATE1	ENSDARG00000103813	101886126	58.4306	60.3354	74.3183	70.0936	67.1237	68.3447	0.0903583	0.937656
atf1	ENSDARG00000044301	325609	706.118	604.343	604.455	784.851	763.039	729.01	0.249796	0.393298
atf2	ENSDARG00000023903	100006516	105.967	87.0413	87.2001	80.9532	76.0078	94.0978	-0.158506	0.868762
atf3	ENSDARG00000007823	393939	449.618	1209.68	815.519	576.545	1116.43	747.83	-0.0199668	0.986925
atf4a	ENSDARG00000111939	406514	1587.53	2203.73	2193.88	2327.9	2453.96	2475.27	0.278015	0.350485
atf4b	ENSDARG00000038141	556410	2204.52	2383.74	2658.61	2124.53	2512.2	2571.35	-0.00774549	0.987457
atf5a	ENSDARG00000068096	566223	50.5078	42.5315	83.2365	48.3745	45.4072	49.5252	-0.2987	0.802798
atf5b	ENSDARG00000077785	567253	237.684	248.265	312.137	294.196	165.835	208.006	-0.256603	0.703838
atf6	ENSDARG00000012656	558071	810.105	731.938	813.537	991.183	894.325	834.994	0.207803	0.508746
atf7a	ENSDARG00000011298	566279	344.641	333.328	369.61	375.149	342.528	251.588	-0.112061	0.866071
atf7b	ENSDARG00000055481	567018	335.728	304.644	347.81	341.583	329.696	329.838	0.0187711	0.976087
atf7ip	ENSDARG00000069619	558977	2451.11	1909.96	2426.74	2766.23	2122.29	2515.88	0.125438	0.778467
atf7ip2	ENSDARG00000089698	100005485	93.0928	77.1502	72.3365	118.468	111.544	110.936	0.491101	0.379891
atg10	ENSDARG00000104846	641330	0	8.90195	7.92728	0.987234	8.88402	24.7626	1.04107	0.785562
atg101	ENSDARG00000043287	567680	68.334	29.6732	81.2547	72.0681	52.317	18.8196	-0.32388	0.853023
atg12	ENSDARG00000069545	570965	14.8552	5.93463	12.8818	0	4.93557	9.90503	-1.18224	0.694685
atg13	ENSDARG00000036040	393405	154.494	159.246	201.155	231.013	191.5	153.528	0.161935	0.835383
ATG14	ENSDARG00000002670	407686	142.61	242.331	222.955	222.128	226.049	267.436	0.235331	0.729329
atg16l1	ENSDARG00000099430	550552	413.966	355.089	428.073	808.545	716.645	604.207	0.830889	0.000219236
atg16l2	ENSDARG00000043238	100034627	12.8745	19.7821	22.7909	24.6808	21.7165	9.90503	0.0221923	0.991498
ATG2A	ENSDARG00000101507	101883461	1087.4	1061.31	1307.01	1005.99	1039.43	1336.19	-0.0312853	0.95708
atg2b	ENSDARG00000097650	100000277	158.456	161.224	162.509	177.702	165.835	273.379	0.355428	0.549977
atg3	ENSDARG00000009350	336632	134.687	175.072	125.846	159.932	134.247	131.737	-0.032455	0.973201
atg4a	ENSDARG00000014531	554140	152.514	107.812	138.727	138.213	133.26	136.689	0.0325781	0.972592
atg4b	ENSDARG00000052104	448859	156.475	88.0304	62.4274	88.8511	85.8789	86.1738	-0.234405	0.839571
atg4c	ENSDARG00000044373	415193	141.62	197.821	175.391	180.664	203.345	259.512	0.321845	0.577835
atg4da	ENSDARG00000043548	795933	213.915	193.865	127.827	158.945	139.183	115.889	-0.37147	0.566761
atg4db	ENSDARG00000088145	100329304	24.7587	26.7058	26.7546	29.617	36.5232	23.7721	0.201054	0.903701
atg5	ENSDARG00000023396	494180	140.629	77.1502	112.964	86.8766	111.544	106.974	-0.115025	0.914764
atg7	ENSDARG00000102893	100333016	158.456	89.0195	108.009	48.3745	75.0207	102.022	-0.657246	0.367956
atg9a	ENSDARG00000044551	100009663	176.282	185.952	180.346	165.855	196.436	168.386	-0.0319921	0.967733
atg9b	ENSDARG00000055292	791223	424.859	530.16	543.019	438.332	488.621	481.385	-0.0890859	0.873838
atic	ENSDARG00000016706	140622	123.794	85.0631	103.055	258.655	212.229	237.721	1.18387	0.000162817
atl1	ENSDARG00000060481	571909	14.8552	38.5751	62.4274	10.8596	55.2784	63.3922	0.160902	0.946104
atl2	ENSDARG00000057719	323665	231.742	274.971	237.818	287.285	283.302	308.047	0.238909	0.592256
atl3	ENSDARG00000004270	449995	824.96	792.273	853.174	678.23	727.503	620.055	-0.286251	0.270016
atm	ENSDARG00000002385	403064	1227.04	1291.77	1336.74	1324.87	1362.22	1503.58	0.120237	0.721472
atmin	ENSDARG00000068601	571606	145.581	97.9214	82.2456	120.443	89.8274	103.012	-0.056293	0.96138
atn1	ENSDARG00000092067	321707	915.082	888.217	830.383	864.817	978.23	1051.91	0.136453	0.718593
atoh1c	ENSDARG00000039602	100498672	0	7.91284	8.91819	0.987234	6.9098	10.8955	0.158911	0.975273
atoh7	ENSDARG00000069552	58216	4.95174	2.96732	0	14.8085	31.5876	3.96201	2.6688	0.199843
atoh8	ENSDARG00000037555	561606	681.36	440.152	359.7	234.962	252.701	376.391	-0.777613	0.0616549
atox1	ENSDARG00000087693	558347	11.8842	25.7167	5.94546	18.7574	16.7809	11.886	0.123041	0.964751
atp10a	ENSDARG00000061039	567172	1189.41	1281.88	1228.73	945.77	1353.33	1082.62	-0.129771	0.778983
atp10b	ENSDARG00000076230	563932	38.6236	75.172	41.6182	36.5277	40.4717	51.5062	-0.274371	0.841505
atp10d	ENSDARG00000078887	571658	647.688	489.607	479.601	658.485	610.036	546.758	0.166976	0.731068
atp11a	ENSDARG00000008413	562925	397.13	464.879	453.837	337.634	384.974	371.439	-0.266321	0.455505
ATP11B	ENSDARG00000101094	100329583	1130.98	1064.28	1029.56	1417.67	1402.69	1020.22	0.252119	0.466017
atp11c	ENSDARG00000036442	368385	1198.32	1293.75	1256.47	1155.06	1284.24	921.168	-0.157657	0.698858
atp13a1	ENSDARG00000029931	334466	587.277	778.426	725.346	790.774	905.183	735.944	0.217863	0.577835
atp13a2	ENSDARG00000061890	568666	336.718	255.189	225.928	230.026	237.894	226.825	-0.235323	0.672716
atp13a3	ENSDARG00000076622	572029	555.585	525.215	563.828	616.034	781.794	728.02	0.370277	0.163971
atp1a1a.1	ENSDARG00000002791	64612	5190.42	4905.96	5435.14	4331	5168.53	5574.55	-0.0431313	0.923977
atp1a1a.2	ENSDARG00000007739	64613	36.6429	81.1066	219.982	47.3872	73.0464	129.756	-0.432881	0.788099
atp1a1a.3	ENSDARG00000039131	64614	57.4402	72.2047	66.391	53.3106	69.098	110.936	0.251264	0.829382
atp1a1a.4	ENSDARG00000001870	64615	485.271	458.945	291.328	26.6553	85.8789	221.873	-1.88549	0.153695
atp1a1a.5	ENSDARG00000040252	245703	10.8938	5.93463	26.7546	4.93617	6.9098	16.8386	-0.60362	0.822852
atp1a1b	ENSDARG00000019856	64616	120.823	164.191	250.7	312.953	339.567	298.141	0.827488	0.0412479
atp1a2a	ENSDARG00000010472	64609	189.157	113.747	127.827	25.6681	82.9176	126.784	-0.87192	0.331678
atp1a3a	ENSDARG00000018259	64610	835.854	728.971	814.528	1218.25	1268.44	1024.18	0.561272	0.00525433
atp1a3b	ENSDARG00000104139	64611	49.5174	10.8802	35.6728	34.5532	39.4846	27.7341	0.0832543	0.969709
atp1b1a	ENSDARG00000013144	64267	2437.25	1656.75	1591.4	1372.26	1460.93	1479.81	-0.398572	0.193711
atp1b1b	ENSDARG00000076833	64273	35.6525	28.6841	31.7091	18.7574	37.5103	31.6961	-0.126819	0.943752
atp1b2a	ENSDARG00000099203	64269	305.027	335.307	377.537	327.762	392.871	459.594	0.213492	0.671297
atp1b3a	ENSDARG00000015790	30468	581.335	809.088	657.965	699.949	889.39	819.146	0.233629	0.571482
atp1b3b	ENSDARG00000042837	64272	166.379	193.865	118.909	94.7745	153.003	172.348	-0.189715	0.845571
atp1b4	ENSDARG00000053262	100037383	280.269	368.936	369.61	40.4766	76.9949	79.2403	-2.3728	4.07903e-12
atp23	ENSDARG00000063686	100004177	15.8456	18.793	20.8091	20.7319	34.549	29.7151	0.616263	0.655537
atp2a1	ENSDARG00000020574	260440	22368	19321.2	14529.7	3976.58	14028.9	15830.2	-0.732508	0.573055
atp2a1l	ENSDARG00000035458	494489	242.635	243.32	112.964	41.4638	181.629	215.93	-0.448099	0.724965
atp2a2a	ENSDARG00000029439	393940	260.462	451.032	318.082	282.349	358.322	324.885	-0.0926315	0.907301
atp2a2b	ENSDARG00000005122	568265	1549.9	1712.14	1593.38	2238.06	2175.6	1749.23	0.344016	0.13929
atp2a3	ENSDARG00000060978	568671	180.243	344.209	238.809	1038.57	784.755	486.337	1.59743	1.08027e-05
atp2b1a	ENSDARG00000012684	378746	480.319	471.803	633.192	528.17	437.291	515.062	-0.0986586	0.868762
atp2b1b	ENSDARG00000007788	561190	4.95174	9.89105	16.8455	23.6936	28.6263	5.94302	0.878771	0.677631
atp2b2	ENSDARG00000044902	768304	4731.88	4715.06	4611.7	3342.77	4074.81	3666.84	-0.342924	0.0599134
atp2b3a	ENSDARG00000043474	436745	17.8263	28.6841	59.4546	75.0298	56.2655	100.041	1.12641	0.184447
atp2b3b	ENSDARG00000023445	558525	22.778	70.2265	60.4455	23.6936	52.317	59.4302	-0.180166	0.920936
atp2c1	ENSDARG00000060197	559574	405.053	367.947	399.337	440.306	422.485	387.287	0.0926484	0.860142
atp5f1b	ENSDARG00000070083	554135	2783.87	2253.18	2167.12	3254.91	2503.32	2316.79	0.164637	0.707847
atp5f1c	ENSDARG00000045514	336957	610.055	287.83	360.691	595.302	331.67	362.524	0.0350288	0.974569
atp5f1d	ENSDARG00000019404	335709	180.243	138.475	160.527	312.953	187.552	169.376	0.483173	0.400601
atp5f1e	ENSDARG00000095897	798291	71.3051	53.4117	58.4637	94.7745	41.4588	46.5537	-0.00305599	0.99967
atp5fa1	ENSDARG00000010149	553755	4519.95	3123.59	3360.18	4930.25	4080.73	3851.08	0.225132	0.561196
atp5if1a	ENSDARG00000067975	100037369	65.363	100.889	105.037	184.613	144.119	110.936	0.696617	0.212
atp5if1b	ENSDARG00000044092	558368	11.8842	20.7712	12.8818	28.6298	20.7294	0.990503	0.145043	0.965343
atp5l	ENSDARG00000011841	326977	79.2279	148.366	103.055	205.345	95.75	73.2972	0.179275	0.896011
atp5mc1	ENSDARG00000056008	406301	224.809	192.876	109	327.762	218.152	111.927	0.320822	0.762896
atp5mc3a	ENSDARG00000017775	394151	255.51	173.093	118.909	370.213	204.333	156.5	0.417087	0.634934
atp5mc3b	ENSDARG00000009447	81541	353.554	164.191	188.273	410.689	268.495	215.93	0.342388	0.682369
atp5md	ENSDARG00000096003	794625	20.7973	27.6949	28.7364	59.234	32.5748	15.8481	0.479321	0.772586
atp5mea	ENSDARG00000078113	559659	48.5271	39.5642	42.6091	82.9277	54.2913	57.4492	0.574785	0.48858
atp5meb	ENSDARG00000068940	767750	72.2954	46.4879	42.6091	66.1447	41.4588	63.3922	0.0833648	0.954545
atp5mf	ENSDARG00000037867	402883	50.5078	36.5969	31.7091	66.1447	38.4974	23.7721	0.112182	0.949565
atp5pb	ENSDARG00000011553	449787	640.755	456.967	440.955	833.225	495.531	431.859	0.194404	0.794389
atp5pd	ENSDARG00000098355	393675	189.157	140.453	109	257.668	129.312	156.5	0.309298	0.722123
atp5pf	ENSDARG00000014313	406599	248.577	154.3	151.609	307.03	235.92	152.538	0.326904	0.679164
atp5po	ENSDARG00000001788	335191	332.757	236.396	225.928	345.532	255.662	249.607	0.0977369	0.90288
atp6ap1a	ENSDARG00000041417	100004566	2.97105	4.94553	12.8818	12.834	11.8454	29.7151	1.38698	0.444979
atp6ap1b	ENSDARG00000037153	195824	323.844	285.851	300.246	398.843	360.297	310.028	0.232666	0.599591
atp6ap1la	ENSDARG00000091509	100000415	6.93244	15.8257	4.95455	46.4	43.433	48.5347	2.3197	0.00428038
atp6ap1lb	ENSDARG00000090963	561786	6.93244	0	0	0	0	15.8481	1.19277	0.88476
atp6ap2	ENSDARG00000008735	406296	147.562	187.93	178.364	217.191	163.861	226.825	0.242391	0.697492
atp6v0a1a	ENSDARG00000020847	324307	390.197	476.749	438.973	360.34	359.309	277.341	-0.389391	0.258335
atp6v0a1b	ENSDARG00000015174	553691	1.9807	20.7712	27.7455	4.93617	22.7036	16.8386	-0.183118	0.955242
atp6v0a2a	ENSDARG00000035538	561469	99.0348	59.3463	106.027	53.3106	73.0464	65.3732	-0.463667	0.579561
atp6v0a2b	ENSDARG00000035565	561117	300.076	355.089	262.591	304.068	286.263	354.6	0.0420669	0.95339
atp6v0b	ENSDARG00000031681	321724	205.992	215.625	194.218	272.477	229.998	204.044	0.198198	0.730697
atp6v0ca	ENSDARG00000057853	192336	1013.13	1023.72	914.61	1170.86	996.985	756.745	-0.0131828	0.984801
atp6v0cb	ENSDARG00000036577	325402	34.6622	52.4226	43.6001	28.6298	44.4201	55.4682	-0.0242038	0.987604
atp6v0d1	ENSDARG00000069090	322811	255.51	200.788	211.064	353.43	251.714	175.319	0.225896	0.77246
atp6v1aa	ENSDARG00000034534	394110	376.332	309.59	322.046	385.021	283.302	269.417	-0.104169	0.881136
atp6v1ab	ENSDARG00000076318	337583	167.369	95.9432	126.837	281.362	114.505	125.794	0.41912	0.656057
atp6v1b2	ENSDARG00000043465	359840	21.7877	25.7167	61.4364	68.1191	25.665	59.4302	0.492023	0.747358
atp6v1ba	ENSDARG00000013443	359839	655.611	499.498	571.755	801.634	564.629	472.47	0.0905765	0.90116
atp6v1c1a	ENSDARG00000023967	368907	411.985	303.655	276.464	287.285	321.799	231.778	-0.238599	0.684009
atp6v1c1b	ENSDARG00000035880	449655	33.6718	52.4226	59.4546	57.2596	36.5232	24.7626	-0.295985	0.841655
atp6v1d	ENSDARG00000011175	393935	159.446	121.66	120.891	178.689	118.454	60.4207	-0.168926	0.89377
atp6v1e1a	ENSDARG00000014085	108179059	142.61	54.4008	81.2547	86.8766	82.9176	78.2498	-0.165839	0.898561
atp6v1e1b	ENSDARG00000030694	192335	198.07	189.908	184.309	291.234	148.067	161.452	0.0700541	0.945323
atp6v1f	ENSDARG00000045543	436799	67.3437	43.5206	30.7182	79.966	56.2655	27.7341	0.211816	0.899144
atp6v1g1	ENSDARG00000022315	335025	110.919	89.0195	121.882	205.345	105.621	88.1548	0.310619	0.754192
atp6v1h	ENSDARG00000006370	286779	142.61	147.377	170.437	166.843	145.106	121.832	-0.085956	0.919031
atp7a	ENSDARG00000003699	564924	845.758	801.175	800.656	745.362	826.214	843.909	-0.0190538	0.969915
atp7b	ENSDARG00000058145	556499	31.6912	4.94553	27.7455	0	1.97423	0.990503	-4.44061	0.00871088
ATP8A1	ENSDARG00000114495		213.915	212.658	223.946	221.14	255.662	194.139	0.0446265	0.951943
atp8a1	ENSDARG00000063001	767630	499.136	576.648	468.701	449.191	618.92	487.328	0.0101976	0.987604
atp8a2	ENSDARG00000077492	100330943	93.0928	154.3	184.309	85.8894	158.925	95.0883	-0.344887	0.709408
atp8b1	ENSDARG00000060980	100148342	344.641	671.602	362.673	124.391	286.263	287.246	-0.982466	0.0546066
atp8b2	ENSDARG00000099216		0.990348	3.95642	9.9091	12.834	13.8196	14.8575	1.48255	0.475422
atp8b3	ENSDARG00000042285	566530	3.96139	53.4117	32.7	13.8213	21.7165	40.6106	-0.242385	0.928474
atp8b4	ENSDARG00000079453	559291	23.7684	16.8148	15.8546	207.319	115.492	113.908	2.952	1.32392e-09
atp8b5a	ENSDARG00000062040	100330945	1198.32	1229.46	1161.35	1119.52	1206.25	1302.51	0.0156475	0.973593
ATP9A	ENSDARG00000115869	101886226	352.564	391.686	380.51	283.336	310.941	309.037	-0.316325	0.33728
atp9b	ENSDARG00000062521	568160	343.651	502.465	503.382	438.332	467.892	430.869	-0.0133227	0.986161
atpaf1	ENSDARG00000042799	550606	77.2472	144.409	75.3092	60.2213	81.9304	67.3542	-0.503328	0.54814
atpaf2	ENSDARG00000056270	560253	47.5367	68.2483	38.6455	46.4	63.1753	86.1738	0.341955	0.77061
atpv0e2	ENSDARG00000059057	553767	0	2.96732	11.8909	0.987234	4.93557	0	-1.32657	0.814142
atr	ENSDARG00000079625	567770	571.431	556.866	504.373	680.204	585.358	673.542	0.248148	0.43429
atraid	ENSDARG00000043388	553468	47.5367	65.2809	38.6455	38.5021	16.7809	17.8291	-1.05073	0.264567
atrip	ENSDARG00000063076	558534	235.703	118.693	129.809	213.243	149.054	217.911	0.260946	0.769226
atrn	ENSDARG00000062164	794975	1058.68	1155.27	937.401	902.332	1024.62	962.769	-0.125046	0.752484
atrnl1a	ENSDARG00000077188	792417	586.286	411.468	418.164	205.345	290.211	306.066	-0.820761	0.0100094
atrnl1b	ENSDARG00000006420	569196	2194.61	2440.12	2784.46	2743.52	3222.93	2948.73	0.265003	0.302757
atrx	ENSDARG00000042236	323299	5470.68	5506.35	4900.05	5821.72	5661.1	5072.37	0.0603384	0.875649
atrxl	ENSDARG00000099449		811.095	1031.64	1085.05	1202.45	1053.25	1147.99	0.217294	0.539777
atxn10	ENSDARG00000008439	100034473	55.4595	91.9868	47.5637	47.3872	70.0851	91.1263	0.0970948	0.946952
atxn1a	ENSDARG00000061687	557340	253.529	223.538	224.937	93.7872	123.389	114.898	-1.07998	0.000298634
atxn1b	ENSDARG00000060862	565841	227.78	149.355	278.446	310.979	272.443	445.726	0.650602	0.168717
atxn1l	ENSDARG00000086977	793927	411.985	427.293	606.437	535.081	557.719	525.957	0.163115	0.762592
atxn2	ENSDARG00000052897	569210	290.172	350.143	309.164	267.54	249.74	280.312	-0.251504	0.557509
atxn2l	ENSDARG00000011597	324525	1686.56	1551.91	1483.39	1807.63	1643.54	1560.04	0.0858081	0.826627
atxn3	ENSDARG00000099274	394079	42.585	77.1502	68.3728	77.0043	79.9562	94.0978	0.41642	0.633486
atxn7	ENSDARG00000074804	100001490	516.962	579.616	575.719	409.702	572.526	509.119	-0.165218	0.730988
atxn7l1	ENSDARG00000089860	100536590	71.3051	73.1938	88.191	53.3106	76.0078	109.946	0.0401351	0.976064
atxn7l2a	ENSDARG00000055300	692316	287.201	324.427	359.7	311.966	319.825	234.749	-0.16466	0.782277
atxn7l2b	ENSDARG00000056268	436928	169.35	145.398	141.7	181.651	172.745	208.006	0.301128	0.571027
atxn7l3	ENSDARG00000029331	368510	72.2954	198.81	194.218	130.315	171.758	176.31	0.0399132	0.976064
auh	ENSDARG00000042975	445182	43.5753	47.4771	27.7455	76.017	44.4201	47.5442	0.499787	0.646022
aup1	ENSDARG00000092609	324654	385.246	506.422	589.592	549.889	518.235	561.615	0.137817	0.806156
aurka	ENSDARG00000012485	445246	505.078	391.686	481.582	367.251	270.469	379.363	-0.438511	0.220361
aurkaip1	ENSDARG00000074985	100126015	49.5174	72.2047	58.4637	159.932	58.2397	60.4207	0.628693	0.533908
aurkb	ENSDARG00000037640	791894	267.394	227.494	275.473	320.851	193.474	265.455	0.0175359	0.984801
auts2a	ENSDARG00000056427	368890	2563.02	2742.79	2742.84	3461.24	3253.53	2986.37	0.26941	0.177977
auts2b	ENSDARG00000020946	100150849	154.494	174.083	256.646	298.145	283.302	358.562	0.683688	0.0731747
aven	ENSDARG00000002894	692323	56.4499	122.649	109	96.7489	96.7372	120.841	0.125667	0.915296
avil	ENSDARG00000059342	678618	0	0	5.94546	0	0	8.91453	0.584279	1
avl9	ENSDARG00000055538	751682	244.616	271.015	246.737	218.179	285.276	306.066	0.0865536	0.902734
avpr1aa	ENSDARG00000077083	571591	76.2568	77.1502	53.5092	93.7872	117.467	72.3067	0.454634	0.565108
avpr1ab	ENSDARG00000045788	555939	129.736	98.9105	85.2183	274.451	241.843	171.357	1.13156	0.00276861
avpr2ab	ENSDARG00000029219	100151502	7.92279	9.89105	22.7909	0	5.92268	3.96201	-2.03842	0.360053
axdnd1	ENSDARG00000062355	557839	23.7684	8.90195	13.8727	13.8213	4.93557	8.91453	-0.750136	0.729637
axin1	ENSDARG00000102964	57931	1495.43	1723.02	1734.09	1605.24	1562.6	1815.59	0.00896534	0.986393
axin2	ENSDARG00000100149	58080	2950.25	2706.19	2865.71	2477.96	2524.05	2349.47	-0.213179	0.310612
AXL	ENSDARG00000112045	100330721	866.555	863.489	986.947	835.2	802.524	818.156	-0.145766	0.672095
azi2	ENSDARG00000102419	406377	128.745	85.0631	138.727	122.417	97.7243	96.0788	-0.156799	0.874072
azin1a	ENSDARG00000052789	550230	297.105	358.056	404.291	246.808	297.121	378.372	-0.200034	0.742393
azin1b	ENSDARG00000035869	317764	1064.62	812.055	901.728	1099.78	940.719	983.57	0.122237	0.785945
b2m	ENSDARG00000053136	30400	27.7298	35.6078	21.8	83.9149	63.1753	60.4207	1.28529	0.0356748
b2ml	ENSDARG00000015887	791742	177.272	185.952	150.618	197.447	188.539	160.462	0.0887688	0.907892
b3galnt2	ENSDARG00000046133	553716	49.5174	76.1611	45.5819	72.0681	67.1237	60.4207	0.220991	0.85041
b3galt1a	ENSDARG00000079700	559521	113.89	119.682	121.882	89.8383	72.0593	137.68	-0.246806	0.78739
b3galt2	ENSDARG00000102061	404633	474.377	272.993	272.5	261.617	330.683	345.686	-0.120754	0.888234
b3galt4	ENSDARG00000076218	101886595	9.90348	14.8366	11.8909	0	8.88402	2.97151	-1.62741	0.526156
b3galt6	ENSDARG00000038414	572324	86.1603	96.9323	130.8	98.7234	108.583	135.699	0.127936	0.899143
B3GAT1	ENSDARG00000113928	100332644	0	6.92374	2.97273	0	9.87114	0	-0.00361089	0.99967
b3gat1a	ENSDARG00000040547	548607	0	1.97821	2.97273	0	15.7938	7.92403	2.26022	0.567655
b3gat1b	ENSDARG00000055279	100332851	0.990348	26.7058	10.9	2.9617	7.89691	7.92403	-1.03918	0.725097
b3gat2	ENSDARG00000030733	445060	3.96139	0.989105	21.8	0	10.8583	14.8575	-0.0569282	0.989299
b3gat3	ENSDARG00000001939	192334	462.493	286.841	242.773	250.757	322.786	217.911	-0.32597	0.624911
b3glcta	ENSDARG00000073917	799443	145.581	127.595	110.982	117.481	137.209	140.651	0.0413799	0.965098
b3glctb	ENSDARG00000077740	564156	0	0	0.99091	7.89787	10.8583	2.97151	4.35178	0.151964
B3GNT10	ENSDARG00000094253	101883349	6.93244	25.7167	11.8909	4.93617	0.987114	19.8101	-0.791779	0.791031
b3gnt2b	ENSDARG00000091902	793362	433.773	374.871	375.555	804.596	638.663	464.546	0.688021	0.028646
b3gnt2l	ENSDARG00000068219	797513	77.2472	108.802	72.3365	161.906	115.492	100.041	0.546726	0.397597
b3gnt3.1	ENSDARG00000043482	494166	63.3823	162.213	88.191	44.4255	105.621	89.1453	-0.39165	0.741469
b3gnt3.2	ENSDARG00000054373	100002020	14.8552	26.7058	17.8364	26.6553	12.8325	39.6201	0.413286	0.830497
b3gnt3.3	ENSDARG00000093521	561028	38.6236	75.172	61.4364	31.5915	61.2011	40.6106	-0.393468	0.746165
b3gnt3.4	ENSDARG00000058100	561172	408.024	268.048	340.873	353.43	261.585	181.262	-0.35286	0.574607
b3gnt5a	ENSDARG00000018971	336526	179.253	263.102	290.337	140.187	173.732	115.889	-0.769477	0.064211
b3gnt5b	ENSDARG00000004396	791470	36.6429	20.7712	14.8637	132.289	90.8145	87.1643	2.1019	0.000159261
b3gnt7	ENSDARG00000038489	286748	211.935	181.995	174.4	62.1957	73.0464	96.0788	-1.29691	0.000232311
b3gnt7l	ENSDARG00000053133	407623	47.5367	34.6187	42.6091	40.4766	64.1624	80.2308	0.567264	0.553977
b3gnt9	ENSDARG00000041616	100034499	172.321	189.908	150.618	206.332	221.113	157.49	0.18977	0.784713
b3gntl1	ENSDARG00000043431	619261	25.7491	59.3463	49.5455	68.1191	50.3428	38.6296	0.222515	0.885052
b4galnt1a	ENSDARG00000061520	558684	0	55.3899	21.8	7.89787	16.7809	9.90503	-1.15832	0.672632
b4galnt1b	ENSDARG00000077352	793635	5.94209	21.7603	32.7	12.834	19.7423	31.6961	0.0895254	0.973214
b4galnt3b	ENSDARG00000058939	553524	72.2954	103.856	109.991	32.5787	76.0078	53.4872	-0.820079	0.252441
b4galnt4a	ENSDARG00000046150	565184	26.7394	37.586	109.991	31.5915	43.433	82.2118	-0.148809	0.941698
b4galnt4b	ENSDARG00000076701	559305	26.7394	72.2047	124.855	95.7617	102.66	140.651	0.59939	0.585915
b4galt1	ENSDARG00000002634		53.4788	104.845	49.5455	6.91064	44.4201	38.6296	-1.20838	0.281649
b4galt1l	ENSDARG00000104404	768123	512.01	653.799	562.837	388.97	403.73	404.125	-0.530439	0.0282575
b4galt2	ENSDARG00000077994	100148828	56.4499	25.7167	61.4364	40.4766	34.549	14.8575	-0.675823	0.603583
b4galt3	ENSDARG00000062329	561756	98.0445	63.3027	100.082	95.7617	123.389	59.4302	0.0917567	0.944322
b4galt4	ENSDARG00000104042	492760	180.243	141.442	147.646	139.2	160.9	141.642	-0.0873883	0.914681
b4galt5	ENSDARG00000037815	724080	818.028	767.546	564.819	442.281	418.536	287.246	-0.905375	0.00171233
b4galt6	ENSDARG00000010301	393912	715.032	721.058	685.71	655.523	647.547	675.523	-0.100819	0.798653
b4galt7	ENSDARG00000021899	445022	177.272	103.856	107.018	142.162	121.415	114.898	-0.0363813	0.973594
b4gat1	ENSDARG00000077583	101669768	217.877	163.202	269.528	177.702	194.461	254.559	-0.0539698	0.953942
b9d1	ENSDARG00000011727	554150	32.6815	93.965	67.3819	119.455	67.1237	105.984	0.592442	0.538931
b9d2	ENSDARG00000017385	436667	10.8938	21.7603	19.8182	34.5532	17.768	18.8196	0.439143	0.813833
baalca	ENSDARG00000077775	572429	0	1.97821	3.96364	2.9617	0.987114	8.91453	1.11414	1
baalcb	ENSDARG00000089549	100536942	0	5.93463	6.93637	2.9617	13.8196	6.93352	0.881677	0.82124
babam1	ENSDARG00000077526	445296	241.645	202.767	176.382	169.804	205.32	206.025	-0.0952213	0.901342
babam2	ENSDARG00000038863	550474	87.1507	136.497	153.591	157.957	151.028	142.632	0.259638	0.735747
bace1	ENSDARG00000101716	403005	47.5367	19.7821	38.6455	13.8213	17.768	34.6676	-0.677545	0.645764
bace2	ENSDARG00000044781	449818	196.089	222.549	204.128	185.6	185.577	220.882	-0.0729785	0.919062
bach1a	ENSDARG00000062553	678555	406.043	418.392	443.928	341.583	327.722	407.097	-0.236773	0.552766
bach1b	ENSDARG00000002196	553688	333.747	397.62	298.264	332.698	356.348	290.217	-0.072354	0.913139
bach2a	ENSDARG00000036569	557210	110.919	129.573	97.1092	113.532	115.492	126.784	0.0757468	0.935794
bach2b	ENSDARG00000004074	555350	1086.41	1051.42	1070.18	1280.44	1282.26	1213.37	0.23521	0.296693
bada	ENSDARG00000087993	564921	0	5.93463	7.92728	13.8213	1.97423	11.886	0.997759	0.788143
badb	ENSDARG00000054937	58100	64.3726	49.4553	102.064	73.0553	67.1237	85.1833	0.0619504	0.963848
bag1	ENSDARG00000020895	558108	91.1121	51.4335	40.6273	68.1191	61.2011	71.3162	0.131366	0.924217
bag2	ENSDARG00000035005	393975	125.774	101.878	63.4183	61.2085	68.1109	42.5916	-0.759656	0.276876
bag3	ENSDARG00000039486	445139	55.4595	126.605	100.082	129.328	110.557	107.965	0.302005	0.751641
bag4	ENSDARG00000043179	100001980	75.2665	90.9977	102.064	81.9404	94.7629	95.0883	0.018497	0.987456
bag5	ENSDARG00000017316	569580	357.516	234.418	287.364	273.464	243.817	340.733	-0.0353661	0.966115
bag6	ENSDARG00000075892	83910	1188.42	1151.32	1023.61	1176.78	997.972	980.598	-0.0920923	0.836142
bag6l	ENSDARG00000077531	751663	603.122	567.746	569.773	609.123	514.286	607.179	-0.00836437	0.987604
bahcc1a	ENSDARG00000103739	797750	4102.02	4637.91	4349.11	3079.18	4080.73	4195.77	-0.204948	0.535567
bahcc1b	ENSDARG00000080009	794333	6528.38	7827.78	8989.54	6021.14	7533.65	8061.71	-0.111024	0.81638
bahd1	ENSDARG00000086789	564712	272.346	291.786	276.464	185.6	229.998	286.255	-0.260284	0.631356
baiap2a	ENSDARG00000062799	678518	285.22	370.914	302.228	149.072	187.552	267.436	-0.665935	0.101633
baiap2b	ENSDARG00000103333		1.9807	3.95642	14.8637	7.89787	2.96134	16.8386	0.413065	0.911343
baiap2l1a	ENSDARG00000029305	387261	13.8649	52.4226	23.7818	0	21.7165	16.8386	-1.22418	0.592207
baiap2l1b	ENSDARG00000031119	550528	1.9807	7.91284	16.8455	6.91064	19.7423	1.98101	0.0989573	0.981038
baiap3	ENSDARG00000079264	564728	14.8552	1.97821	1.98182	0	11.8454	3.96201	-0.251229	0.962017
bambia	ENSDARG00000055381	83496	437.734	451.032	425.101	1344.61	1099.64	1042.01	1.40787	7.60915e-15
bambib	ENSDARG00000099677	431736	137.658	214.636	165.482	370.213	365.232	272.388	0.960857	0.00307829
banf1	ENSDARG00000037009	334717	795.25	580.605	575.719	908.255	619.907	532.891	0.0787579	0.917851
banp	ENSDARG00000017562	553659	189.157	199.799	196.2	191.523	186.565	274.369	0.157018	0.827157
bap1	ENSDARG00000063051	558885	206.983	163.202	162.509	184.613	147.08	183.243	-0.0489269	0.954177
bard1	ENSDARG00000076733	100147913	196.089	160.235	157.555	137.226	136.222	139.661	-0.31491	0.558803
barhl1a	ENSDARG00000035508	550407	1.9807	2.96732	12.8818	4.93617	10.8583	24.7626	1.18565	0.649628
barhl2	ENSDARG00000104361	100001699	4.95174	8.90195	7.92728	1.97447	4.93557	12.8765	-0.138815	0.972349
barx1	ENSDARG00000007407	553644	359.496	146.388	275.473	439.319	354.374	725.048	0.958819	0.0541644
barx2	ENSDARG00000041098	100002200	35.6525	1.97821	2.97273	5.9234	1.97423	6.93352	-1.45306	0.621749
basp1	ENSDARG00000053358	569631	13.8649	19.7821	7.92728	39.4894	41.4588	46.5537	1.61664	0.0507612
batf3	ENSDARG00000042577	751677	0	0.989105	0	15.7957	0.987114	0	3.97922	1
baxa	ENSDARG00000020623	58081	127.755	208.701	160.527	170.791	198.41	125.794	-0.00576278	0.995699
baxb	ENSDARG00000030881	503609	66.3533	72.2047	35.6728	88.8511	60.2139	59.4302	0.259007	0.835529
baz1a	ENSDARG00000099745	334173	1256.75	1377.82	1227.74	1443.34	1573.46	1490.71	0.222861	0.35652
baz1b	ENSDARG00000102832	571727	3658.35	3330.32	3248.2	3817.63	3715.5	3617.32	0.123328	0.659599
baz2a	ENSDARG00000102974	450079	4378.33	3811.02	4319.38	4529.43	4562.44	4919.83	0.163696	0.527975
baz2ba	ENSDARG00000057782	561095	6099.56	6453.91	7473.45	5915.51	6281.99	6956.3	-0.0643102	0.879784
bbc3	ENSDARG00000069282	751763	70.3147	51.4335	15.8546	33.566	38.4974	48.5347	-0.190358	0.918822
bbip1	ENSDARG00000071046	795943	7.92279	2.96732	13.8727	14.8085	17.768	7.92403	0.709958	0.775927
bbox1	ENSDARG00000036135	572649	65.363	33.6296	43.6001	53.3106	39.4846	22.7816	-0.302945	0.842031
bbs1	ENSDARG00000075169	568986	27.7298	57.3681	62.4274	57.2596	65.1495	36.6486	0.108642	0.946007
bbs10	ENSDARG00000069515	100034535	5.94209	47.4771	27.7455	54.2979	46.3943	38.6296	0.779468	0.60815
bbs12	ENSDARG00000016112	570583	76.2568	55.3899	83.2365	53.3106	60.2139	76.2688	-0.179148	0.878398
bbs2	ENSDARG00000041621	259187	112.9	134.518	118.909	199.421	199.397	185.224	0.672937	0.0513233
bbs4	ENSDARG00000063522	768303	74.2761	59.3463	24.7728	46.4	31.5876	71.3162	-0.0853635	0.962879
bbs5	ENSDARG00000039827	393269	24.7587	6.92374	4.95455	11.8468	12.8325	24.7626	0.432358	0.873838
bbs7	ENSDARG00000059911	557491	79.2279	56.379	52.5183	98.7234	85.8789	63.3922	0.398663	0.654922
bbs9	ENSDARG00000079217	100333716	185.195	156.279	199.173	129.328	210.255	183.243	-0.0483514	0.958583
bbx	ENSDARG00000012699	100005540	385.246	423.337	448.882	355.404	363.258	442.755	-0.114654	0.834526
bcam	ENSDARG00000090190	767689	750.684	961.41	720.392	637.753	729.477	688.4	-0.242859	0.505721
bcan	ENSDARG00000099412	334113	28.7201	54.4008	54.5001	5.9234	82.9176	55.4682	0.0684498	0.978368
bcap29	ENSDARG00000016231	554151	187.176	276.949	269.528	301.106	283.302	271.398	0.222188	0.69643
bcap31	ENSDARG00000044972	368488	425.85	249.255	257.637	279.387	306.005	253.569	-0.152856	0.844098
bcar1	ENSDARG00000056525	568309	1859.87	1766.54	1614.19	1164.94	1203.29	1062.81	-0.611083	0.000204118
bcar3	ENSDARG00000016981	570610	243.626	288.819	256.646	161.906	177.68	155.509	-0.672473	0.0245575
bcas2	ENSDARG00000043631	493614	124.784	65.2809	57.4728	152.034	86.866	58.4397	0.26451	0.847545
bcas3	ENSDARG00000090764	393594	340.68	327.394	298.264	331.711	266.521	322.904	-0.0691274	0.913148
bcat1	ENSDARG00000045568	337412	6.93244	1.97821	3.96364	41.4638	32.5748	24.7626	2.9402	0.00289369
bcat2	ENSDARG00000054849	436949	351.574	339.263	324.028	384.034	315.876	364.505	0.0687676	0.907622
bccip	ENSDARG00000004948	541348	283.24	181.995	211.064	339.608	257.637	379.363	0.53011	0.215636
bcdin3d	ENSDARG00000074111	568375	0	3.95642	3.96364	8.88511	2.96134	6.93352	1.24555	0.740377
bckdha	ENSDARG00000040555	554124	390.197	300.688	330.964	465.974	358.322	431.859	0.297835	0.469508
bckdhb	ENSDARG00000014676	569980	330.776	224.527	185.3	308.017	219.139	197.11	-0.0321626	0.974871
bckdhbl	ENSDARG00000093569	555648	17.8263	1.97821	8.91819	26.6553	1.97423	4.95252	0.225622	0.955125
bckdk	ENSDARG00000016904	282677	479.329	326.405	369.61	388.97	362.271	319.933	-0.133869	0.830967
bcl10	ENSDARG00000077130	100334750	17.8263	51.4335	25.7637	160.919	126.351	61.4112	1.87552	0.00522611
bcl11aa	ENSDARG00000061352	678650	1009.17	970.312	1109.82	1209.36	1136.17	947.912	0.0923314	0.842606
bcl11ab	ENSDARG00000063153	566491	935.879	1209.68	1254.49	1017.84	940.719	1154.93	-0.127033	0.788181
bcl11ba	ENSDARG00000062510	100093707	201.041	403.555	413.21	216.204	247.766	340.733	-0.338958	0.640243
bcl2a	ENSDARG00000094704	570772	360.487	397.62	393.391	376.136	440.253	476.432	0.166993	0.719328
bcl2b	ENSDARG00000089109	100007048	2.97105	8.90195	17.8364	7.89787	5.92268	5.94302	-0.588006	0.848641
bcl2l1	ENSDARG00000008434	114401	483.29	397.62	348.8	353.43	399.781	374.41	-0.125038	0.828573
bcl2l10	ENSDARG00000026766	373113	127.755	143.42	151.609	193.498	216.178	198.101	0.523625	0.163145
bcl2l11	ENSDARG00000079144	100190951	110.919	122.649	81.2547	39.4894	82.9176	99.0503	-0.507582	0.574098
bcl2l13	ENSDARG00000062370	559355	132.707	90.0086	80.2637	142.162	131.286	87.1643	0.251274	0.789631
bcl2l16	ENSDARG00000114237	100359374	102.996	228.483	287.364	254.706	322.786	520.014	0.826568	0.172279
bcl3	ENSDARG00000087832	565656	56.4499	77.1502	111.973	6.91064	5.92268	21.7911	-2.8267	0.000117079
bcl6aa	ENSDARG00000070864	393707	71.3051	112.758	126.837	80.9532	146.093	157.49	0.306643	0.751396
bcl6ab	ENSDARG00000069295	100001936	227.78	292.775	283.4	267.54	384.974	329.838	0.289121	0.560928
bcl6b	ENSDARG00000069335	793278	2298.6	1708.18	2159.19	846.06	884.454	891.453	-1.23368	1.47486e-12
bcl7a	ENSDARG00000052907	57952	433.773	467.847	474.646	523.234	460.982	479.404	0.0887843	0.859884
bcl7ba	ENSDARG00000111877	406444	142.61	59.3463	98.1001	103.66	65.1495	53.4872	-0.43269	0.678719
bcl7bb	ENSDARG00000040396	81595	52.4885	58.3572	52.5183	68.1191	64.1624	58.4397	0.223388	0.832769
bcl9	ENSDARG00000036687	449616	5216.17	4166.11	4623.59	4443.54	3727.34	4329.49	-0.16406	0.613705
bcl9l	ENSDARG00000055054	449532	312.95	406.522	387.446	388.97	379.052	373.42	0.0443065	0.945175
bco1	ENSDARG00000104256	84039	112.9	79.1284	71.3455	36.5277	61.2011	41.6011	-0.918573	0.149107
bco2a	ENSDARG00000055722	793849	0	9.89105	0	3.94894	9.87114	0.990503	0.58237	0.925669
bco2b	ENSDARG00000041715	678554	19.807	11.8693	3.96364	0	4.93557	7.92403	-1.47091	0.60815
bco2l	ENSDARG00000027620	84041	13.8649	0.989105	2.97273	5.9234	0.987114	0.990503	-1.17369	0.782101
bcor	ENSDARG00000017798	402921	4512.03	5021.69	5866.19	3559.97	4529.87	5118.92	-0.221429	0.552999
bcorl1	ENSDARG00000077912	792710	349.593	308.601	428.073	481.77	571.539	480.394	0.49766	0.0987038
bcr	ENSDARG00000079286	568320	580.344	653.799	629.228	834.213	847.931	758.726	0.389486	0.0797638
bcs1l	ENSDARG00000012295	394157	12.8745	35.6078	54.5001	66.1447	57.2526	68.3447	0.896779	0.373997
bdh1	ENSDARG00000059388	100037356	109.929	80.1175	75.3092	322.826	168.796	209.987	1.40275	0.000505796
bdh2	ENSDARG00000052696	550507	37.6332	26.7058	5.94546	51.3362	23.6907	18.8196	0.417115	0.8534
bdnf	ENSDARG00000018817	58118	11.8842	18.793	8.91819	0	5.92268	12.8765	-1.07494	0.712487
bean1	ENSDARG00000087413	101885923	64.3726	98.9105	60.4455	31.5915	58.2397	31.6961	-0.880433	0.251938
becn1	ENSDARG00000079128	393846	258.481	148.366	146.655	169.804	143.132	139.661	-0.290345	0.700289
bend3	ENSDARG00000076903	565716	343.651	306.623	246.737	321.838	211.242	257.531	-0.182158	0.785562
BEND4	ENSDARG00000113607	566937	33.6718	18.793	13.8727	26.6553	20.7294	57.4492	0.660105	0.670106
bend5	ENSDARG00000075624	566161	349.593	362.013	314.119	303.081	297.121	372.429	-0.0767093	0.903049
best1	ENSDARG00000078331	560608	10.8938	3.95642	0	0	4.93557	0.990503	-1.32519	0.812027
best4	ENSDARG00000078455	563711	21.7877	4.94553	2.97273	0	0.987114	0	-4.80559	0.0843594
bet1	ENSDARG00000034885	415135	34.6622	42.5315	35.6728	62.1957	36.5232	55.4682	0.450029	0.674204
bet1l	ENSDARG00000032037	445493	36.6429	15.8257	34.6819	30.6043	19.7423	27.7341	-0.158515	0.934892
BFSP1	ENSDARG00000074919		0	10.8802	6.93637	0	4.93557	10.8955	-0.170643	0.97626
bglapl	ENSDARG00000104467	337724	0	0	0	7.89787	0.987114	0	4.02345	1
bgnb	ENSDARG00000002945	792197	32.6815	15.8257	14.8637	1.97447	8.88402	11.886	-1.47849	0.361853
bhlha15	ENSDARG00000045166	777671	14.8552	0	4.95455	10.8596	5.92268	0	-0.239092	0.966386
bhlha9	ENSDARG00000103981	323481	20.7973	38.5751	22.7909	13.8213	33.5619	19.8101	-0.290184	0.883043
bhlhe22	ENSDARG00000058039	393930	0	1.97821	3.96364	6.91064	25.665	20.8006	3.1673	0.0689997
bhlhe40	ENSDARG00000004060	324413	223.819	216.614	235.837	384.034	288.237	273.379	0.483731	0.181406
bhmt	ENSDARG00000013430	322228	1574.65	1050.43	1218.82	1340.66	919.003	919.187	-0.274057	0.556198
bicc1a	ENSDARG00000061682	568201	758.607	780.404	867.047	615.047	625.83	833.013	-0.214349	0.59551
bicc1b	ENSDARG00000070497	571411	321.863	376.849	502.392	445.243	410.639	426.907	0.0949306	0.888963
bicc2	ENSDARG00000076557	402785	1.9807	18.793	43.6001	0	8.88402	7.92403	-1.93739	0.43429
bicd1a	ENSDARG00000079496	556758	42.585	64.2918	46.5728	6.91064	12.8325	20.8006	-1.92046	0.0145429
BICD2	ENSDARG00000098215	100330881	848.729	1039.55	969.11	595.302	749.219	731.982	-0.460549	0.0593775
bicd2	ENSDARG00000075571	557383	784.356	748.753	740.21	603.2	545.874	552.701	-0.417756	0.0476356
bicdl1	ENSDARG00000074761	100537719	0	10.8802	0.99091	0	6.9098	0.990503	-0.587439	0.931846
bicdl2	ENSDARG00000052427	777640	25.7491	47.4771	8.91819	2.9617	16.7809	13.867	-1.28938	0.461608
bicdl2l	ENSDARG00000091669	100334848	33.6718	55.3899	26.7546	0.987234	12.8325	31.6961	-1.34761	0.430975
bicra	ENSDARG00000061159	386775	1072.55	1089	1223.77	1165.92	1078.92	1348.08	0.0858517	0.852033
bicral	ENSDARG00000016089	559084	457.541	559.834	499.419	448.204	408.665	541.805	-0.11699	0.832769
bida	ENSDARG00000069290	559425	69.3244	24.7276	20.8091	69.1064	35.5361	28.7246	0.215566	0.913061
bik	ENSDARG00000045549	564030	4.95174	4.94553	7.92728	7.89787	6.9098	2.97151	-0.00348582	0.99967
bin1a	ENSDARG00000042114	563561	1.9807	7.91284	21.8	2.9617	14.8067	3.96201	-0.544321	0.881402
bin1b	ENSDARG00000058820	447863	270.365	275.96	192.237	243.847	186.565	190.177	-0.251082	0.679832
bin2a	ENSDARG00000003219	492780	18.8166	15.8257	6.93637	0	22.7036	7.92403	-0.440981	0.905342
bin2b	ENSDARG00000010255	327387	250.558	199.799	209.082	390.945	270.469	236.73	0.445733	0.343303
bin3	ENSDARG00000099651	323976	320.873	218.592	260.609	232	195.449	243.664	-0.253587	0.654268
birc2	ENSDARG00000044619	373107	598.17	526.204	605.446	1117.55	787.717	738.915	0.612212	0.0264053
birc5a	ENSDARG00000075621	373110	149.543	106.823	116.927	106.621	69.098	79.2403	-0.55002	0.357366
birc6	ENSDARG00000074166	796547	7993.1	9163.07	8337.52	7479.28	8777.42	7950.77	-0.0746882	0.839551
birc6-as2	ENSDARG00000097706	101885944	23.7684	52.4226	58.4637	19.7447	66.1366	56.4587	0.0800522	0.967923
birc7	ENSDARG00000058082	100073331	13.8649	0	6.93637	14.8085	16.7809	5.94302	0.85162	0.793631
bivm	ENSDARG00000061409		40.6043	30.6623	34.6819	26.6553	58.2397	49.5252	0.343381	0.801503
blcap	ENSDARG00000052073	57918	329.786	245.298	223.946	361.328	261.585	214.939	0.0684708	0.939227
blf	ENSDARG00000043126	503516	9.90348	31.6514	15.8546	309.991	233.946	130.746	3.55475	5.66218e-11
blk	ENSDARG00000007783	567764	0	0	0.99091	6.91064	9.87114	3.96201	4.28491	0.159963
blm	ENSDARG00000077089	572540	543.701	416.413	495.455	442.281	508.364	611.141	0.1016	0.868762
blmh	ENSDARG00000025977	336541	378.313	327.394	243.764	381.072	261.585	239.702	-0.105743	0.900097
blnk	ENSDARG00000042722	405764	1.9807	3.95642	3.96364	82.9277	62.1882	40.6106	4.2295	4.99569e-08
bloc1s1	ENSDARG00000014171	556597	2.97105	6.92374	7.92728	14.8085	12.8325	0.990503	0.684094	0.843106
bloc1s2	ENSDARG00000046081	606665	62.392	25.7167	27.7455	42.4511	17.768	21.7911	-0.498382	0.757452
bloc1s3	ENSDARG00000068828	553529	16.8359	18.793	4.95455	0	2.96134	7.92403	-1.89896	0.439642
bloc1s4	ENSDARG00000007597	445081	38.6236	28.6841	23.7818	33.566	17.768	11.886	-0.526793	0.743606
bloc1s5	ENSDARG00000111747	324781	14.8552	3.95642	10.9	8.88511	11.8454	9.90503	0.0442523	0.988058
bloc1s6	ENSDARG00000042933	791215	89.1314	46.4879	87.2001	63.183	55.2784	55.4682	-0.35733	0.725382
blvra	ENSDARG00000059857	767661	56.4499	56.379	57.4728	79.966	36.5232	38.6296	-0.134669	0.927598
blvrb	ENSDARG00000096829	436959	13.8649	23.7385	17.8364	18.7574	10.8583	6.93352	-0.600973	0.763051
blzf1	ENSDARG00000011299	114452	225.799	163.202	156.564	205.345	180.642	232.768	0.181597	0.798733
bmb	ENSDARG00000096603	559540	80.2182	97.9214	148.637	50.3489	52.317	94.0978	-0.731911	0.317022
bmf1	ENSDARG00000090234	571949	67.3437	38.5751	31.7091	16.783	24.6778	55.4682	-0.505905	0.742279
bmf2	ENSDARG00000041414	751764	6.93244	7.91284	14.8637	3.94894	21.7165	8.91453	0.219134	0.945238
bmi1a	ENSDARG00000006010	321505	253.529	142.431	213.046	178.689	148.067	151.547	-0.348506	0.580929
bmi1b	ENSDARG00000013076	394249	118.842	181.006	161.518	158.945	194.461	154.519	0.138706	0.868762
bmp10	ENSDARG00000061769	562533	10.8938	0.989105	0.99091	15.7957	20.7294	5.94302	1.72206	0.479036
bmp16	ENSDARG00000103679	100329171	391.188	240.353	238.809	195.472	161.887	178.291	-0.700302	0.0796107
bmp1a	ENSDARG00000028071	572452	2979.96	3283.83	2943	3634.01	4010.64	3492.51	0.274613	0.175674
bmp1b	ENSDARG00000028053	559877	16.8359	29.6732	34.6819	97.7362	77.982	43.5821	1.43357	0.0452043
bmp2a	ENSDARG00000013409	30631	65.363	56.379	67.3819	42.4511	32.5748	39.6201	-0.722148	0.3112
bmp2b	ENSDARG00000041430	30632	448.628	481.694	379.519	377.123	375.103	417.992	-0.162634	0.729708
bmp2k	ENSDARG00000020009	494101	1149.79	976.247	940.374	1080.03	892.351	883.529	-0.102594	0.829386
bmp3	ENSDARG00000060526	777717	1255.76	1078.12	1152.43	877.651	978.23	962.769	-0.306699	0.187749
bmp4	ENSDARG00000019995	30612	873.487	778.426	595.537	314.928	447.163	284.274	-1.10288	7.75553e-05
bmp5	ENSDARG00000101701	394026	285.22	219.581	327.991	472.885	359.309	610.15	0.79238	0.0228317
bmp6	ENSDARG00000015686	503761	537.759	444.108	414.201	275.438	303.044	303.094	-0.663218	0.00859477
bmp7b	ENSDARG00000063230	557567	266.404	266.069	281.419	274.451	203.345	188.196	-0.289302	0.569793
bmp8a	ENSDARG00000035677	561963	45.556	15.8257	26.7546	10.8596	9.87114	29.7151	-0.805164	0.633515
bmper	ENSDARG00000101980	338246	89.1314	88.0304	59.4546	238.911	219.139	219.892	1.51859	1.69649e-06
bmpr1aa	ENSDARG00000019728	58145	2202.53	1863.47	2078.93	1879.69	1918.95	2056.28	-0.0697485	0.861977
bmpr1ab	ENSDARG00000105045	447846	1910.38	2065.25	2378.18	1867.85	2139.08	2832.84	0.106316	0.845698
bmpr1ba	ENSDARG00000104100	30742	436.744	623.136	894.792	367.251	485.66	655.713	-0.373705	0.547934
bmpr1bb	ENSDARG00000102742	100149664	527.856	703.254	705.528	327.762	359.309	436.812	-0.785086	0.00225404
bmpr2a	ENSDARG00000011941	562822	1714.29	1520.25	1685.54	1145.19	1419.47	1329.26	-0.337461	0.140317
bmpr2b	ENSDARG00000020057	555655	1643.98	1836.77	1679.59	1797.75	2182.51	2371.26	0.29963	0.244643
bms1	ENSDARG00000054154	553241	362.468	301.677	319.073	846.06	635.701	591.33	1.07622	5.39687e-06
bmt2	ENSDARG00000062181	558558	102.996	76.1611	73.3274	87.8638	96.7372	46.5537	-0.127262	0.920188
BNC1	ENSDARG00000100757	568786	1315.18	1440.14	1576.54	1005	1078.92	1153.94	-0.419953	0.0382397
bnc2	ENSDARG00000069989	559327	3343.42	3374.83	3167.94	1381.14	1535.95	1453.07	-1.17773	2.06526e-19
bnip1a	ENSDARG00000078259	565822	0	2.96732	13.8727	4.93617	28.6263	19.8101	1.6643	0.523116
bnip1b	ENSDARG00000104280	795732	68.334	38.5751	35.6728	32.5787	49.3557	49.5252	-0.117193	0.941161
bnip2	ENSDARG00000013397	394197	742.761	709.188	696.61	618.008	704.799	648.78	-0.12401	0.751033
bnip3	ENSDARG00000099961	336116	18.8166	25.7167	16.8455	27.6426	11.8454	14.8575	-0.175567	0.936813
bnip3la	ENSDARG00000025468	323563	175.292	125.616	105.037	194.485	173.732	184.234	0.444561	0.40905
bnip3lb	ENSDARG00000028067	554650	50.5078	52.4226	84.2274	51.3362	50.3428	82.2118	-0.0254503	0.987214
bnip4	ENSDARG00000022832	568155	68.334	79.1284	88.191	82.9277	86.866	87.1643	0.124866	0.901753
bnipl	ENSDARG00000060435	100149386	91.1121	79.1284	64.4092	138.213	126.351	117.87	0.704704	0.135558
boc	ENSDARG00000074335	334628	7656.38	10019.6	10568.1	6539.44	7446.79	7526.83	-0.392736	0.0913332
bod1	ENSDARG00000103922	767743	155.485	118.693	112.964	136.238	117.467	129.756	-0.0137823	0.987918
bod1l1	ENSDARG00000089505	100332682	524.885	566.757	513.292	529.157	597.204	632.932	0.132467	0.760458
boka	ENSDARG00000052129	445218	43.5753	74.1829	49.5455	61.2085	56.2655	25.7531	-0.224099	0.883338
bokb	ENSDARG00000008807	394160	17.8263	4.94553	0	6.91064	2.96134	15.8481	0.175519	0.970506
bola1	ENSDARG00000039915	445163	46.5464	14.8366	32.7	25.6681	41.4588	31.6961	0.0709642	0.972496
BOLA2	ENSDARG00000111714	553698	50.5078	53.4117	65.4001	94.7745	51.3299	79.2403	0.412384	0.661126
bola3	ENSDARG00000098130	445131	15.8456	23.7385	31.7091	38.5021	33.5619	35.6581	0.595497	0.630042
bop1	ENSDARG00000063627	777627	216.886	190.897	264.573	652.562	405.704	479.404	1.19346	3.76625e-05
bora	ENSDARG00000042688	555606	167.369	179.028	181.337	99.7106	160.9	127.775	-0.442317	0.400843
borcs5	ENSDARG00000077830	449650	2.97105	17.8039	9.9091	19.7447	3.94846	12.8765	0.253085	0.939087
borcs7	ENSDARG00000055070	664759	4.95174	2.96732	11.8909	8.88511	15.7938	17.8291	1.10158	0.599639
borcs8	ENSDARG00000071339	558180	25.7491	21.7603	41.6182	30.6043	15.7938	22.7816	-0.365487	0.830996
bpgm	ENSDARG00000070826	436903	34.6622	47.4771	42.6091	43.4383	72.0593	38.6296	0.305143	0.812899
bphl	ENSDARG00000102877	402804	17.8263	62.3136	39.6364	46.4	24.6778	61.4112	0.14544	0.941132
bpifcl	ENSDARG00000099980	100003132	3.96139	0	0.99091	10.8596	11.8454	10.8955	2.76251	0.20629
bpnt1	ENSDARG00000043684	436627	18.8166	34.6187	45.5819	38.5021	19.7423	37.6391	-0.0464253	0.982481
bptf	ENSDARG00000077361	324479	4675.43	4649.78	4816.82	5058.59	4918.79	5312.07	0.112545	0.6666
braf	ENSDARG00000017661	403065	544.692	464.879	586.619	532.119	667.289	619.065	0.188101	0.661678
brap	ENSDARG00000008560	436739	119.832	132.54	151.609	164.868	104.634	146.594	0.0426226	0.965514
brat1	ENSDARG00000062585	678547	127.755	101.878	83.2365	110.57	65.1495	72.3067	-0.335046	0.706551
brca2	ENSDARG00000079015	566758	839.815	1061.31	951.274	1013.89	1210.2	1232.19	0.277034	0.353497
brcc3	ENSDARG00000098242	100333845	66.3533	89.0195	111.973	77.9915	100.686	85.1833	-0.0189145	0.987457
brd1a	ENSDARG00000013596	569574	664.524	744.796	719.401	607.149	833.124	800.327	0.0738904	0.895886
brd1b	ENSDARG00000051798	100009661	1777.68	1846.66	1815.35	1918.2	2205.21	2106.8	0.195757	0.422748
brd2a	ENSDARG00000022280	30445	1622.19	2403.53	2254.32	1788.87	2819.2	2719.92	0.222641	0.661672
brd2b	ENSDARG00000046087	569354	228.77	205.734	207.1	156.97	221.113	243.664	-0.0453829	0.956901
brd3a	ENSDARG00000006527	327372	1471.66	1224.51	1502.22	1550.94	1332.6	1682.87	0.121223	0.778192
brd3b	ENSDARG00000100129	327108	3198.83	2874.34	3134.25	3025.87	2937.65	3218.15	-0.00404102	0.991093
brd4	ENSDARG00000078904	570531	3541.49	3029.63	3434.5	3486.91	3367.05	3529.16	0.0534316	0.89051
brd7	ENSDARG00000008380	406675	636.794	545.986	625.264	884.562	521.196	698.305	0.21875	0.674515
brd8	ENSDARG00000025071	337414	1026.99	991.083	906.683	967.489	1055.22	857.776	-0.0219939	0.966119
brd9	ENSDARG00000017143	393245	300.076	490.596	503.382	441.294	425.446	476.432	0.0537378	0.94519
brdt	ENSDARG00000102802	333996	529.836	569.725	691.655	528.17	722.567	750.802	0.160164	0.766872
brf1a	ENSDARG00000017835	334402	47.5367	57.3681	27.7455	88.8511	96.7372	74.2877	0.970168	0.123722
brf1b	ENSDARG00000005002	334316	523.894	414.435	414.201	355.404	424.459	450.679	-0.136377	0.80353
brf2	ENSDARG00000002060	445142	32.6815	26.7058	40.6273	30.6043	24.6778	30.7056	-0.218002	0.890935
bri3	ENSDARG00000086332	100002236	339.69	190.897	169.446	205.345	212.229	187.205	-0.211002	0.800621
bri3bp	ENSDARG00000010108	327046	114.88	153.311	151.609	146.111	141.157	165.414	0.108767	0.897051
brinp1	ENSDARG00000078302	100334375	21.7877	4.94553	2.97273	0	4.93557	6.93352	-1.32373	0.698858
brinp2	ENSDARG00000014302	561009	0	3.95642	6.93637	7.89787	6.9098	13.867	1.39638	0.640659
brinp3a.1	ENSDARG00000076351	569746	0	22.7494	5.94546	5.9234	31.5876	2.97151	0.49651	0.906958
brinp3a.2	ENSDARG00000061051	100001603	2.97105	23.7385	15.8546	9.87234	26.6521	15.8481	0.299143	0.915272
brinp3b	ENSDARG00000075352	100330048	57.4402	47.4771	35.6728	31.5915	34.549	31.6961	-0.523049	0.615395
brip1	ENSDARG00000074410	794038	506.068	544.997	563.828	564.698	608.062	689.39	0.205517	0.573116
brk1	ENSDARG00000041974	415187	151.523	157.268	96.1183	154.009	107.595	72.3067	-0.2781	0.779574
brms1	ENSDARG00000051955	791681	138.649	103.856	97.1092	115.506	73.0464	87.1643	-0.300697	0.719328
brms1la	ENSDARG00000006235	792017	345.632	367.947	411.228	452.153	332.657	509.119	0.202065	0.708174
brms1lb	ENSDARG00000018047	562889	97.0541	80.1175	58.4637	74.0425	81.9304	38.6296	-0.275955	0.817365
brox	ENSDARG00000013659	492786	261.452	233.429	151.609	233.974	216.178	237.721	0.0894973	0.915296
brpf1	ENSDARG00000103665		421.888	473.781	481.582	508.426	449.137	544.777	0.125404	0.792774
brpf3a	ENSDARG00000070513	100149254	438.724	429.272	370.6	356.391	352.4	354.6	-0.220039	0.573774
brpf3b	ENSDARG00000074238	100003354	774.452	1001.96	883.892	759.183	992.049	927.111	0.00974116	0.987457
brsk2b	ENSDARG00000077791	100149571	14.8552	77.1502	117.918	68.1191	106.608	98.0598	0.377914	0.821821
brwd1	ENSDARG00000074747	798858	1648.93	1810.06	1961.01	1562.79	1903.16	1914.64	-0.0105324	0.984801
brwd3	ENSDARG00000035540	553209	1059.67	1014.82	1051.36	1104.71	998.959	1207.42	0.0830525	0.845073
bscl2	ENSDARG00000037008	567403	325.825	191.886	224.937	270.502	169.784	216.92	-0.176325	0.833229
bsdc1	ENSDARG00000052623	794882	311.96	281.895	277.455	361.328	233.946	298.141	0.0361446	0.963323
bsg	ENSDARG00000019881	337692	2037.15	2122.62	2301.88	2134.4	2256.54	2392.07	0.0700199	0.856189
bsk146	ENSDARG00000099069	791840	23.7684	39.5642	54.5001	15.7957	41.4588	88.1548	0.3033	0.879726
bsnb	ENSDARG00000079161	101175706	60.4113	83.0848	128.818	26.6553	64.1624	85.1833	-0.629746	0.555605
bspry	ENSDARG00000104875	559377	1.9807	18.793	15.8546	5.9234	14.8067	4.95252	-0.512086	0.874014
btaf1	ENSDARG00000060089	565357	1243.88	1351.12	1355.57	1394.96	1482.64	1588.77	0.177041	0.53101
btbd10a	ENSDARG00000062674	560466	463.483	420.37	441.946	628.868	423.472	447.707	0.178158	0.738041
btbd10b	ENSDARG00000020252	557247	757.617	520.269	591.574	637.753	559.694	539.824	-0.105787	0.859111
btbd11a	ENSDARG00000063255	562893	285.22	377.838	287.364	226.077	317.851	308.047	-0.157782	0.810349
btbd11b	ENSDARG00000063040	100034519	21.7877	48.4662	75.3092	267.54	203.345	119.851	2.02091	0.000369377
btbd17a	ENSDARG00000099321	563263	0	20.7712	10.9	12.834	8.88402	7.92403	-0.0955457	0.982765
btbd17b	ENSDARG00000102472	563672	16.8359	2.96732	3.96364	5.9234	8.88402	12.8765	0.220052	0.95037
btbd2a	ENSDARG00000042091	565970	190.147	257.167	199.173	170.791	290.211	252.578	0.142438	0.863935
btbd2b	ENSDARG00000104653	555499	277.298	264.091	254.664	217.191	293.173	308.047	0.0399404	0.956985
btbd3a	ENSDARG00000005544	563691	207.973	191.886	180.346	198.434	134.247	215.93	-0.0808123	0.925705
btbd3b	ENSDARG00000087517	562593	0	7.91284	10.9	10.8596	4.93557	1.98101	-0.0816477	0.987457
btbd6a	ENSDARG00000076440	100141360	158.456	152.322	153.591	135.251	187.552	189.186	0.140821	0.857403
btbd6b	ENSDARG00000032369	553533	286.211	304.644	283.4	237.923	260.598	249.607	-0.224773	0.60693
btbd7	ENSDARG00000003069	568372	924.985	874.369	1076.13	843.098	887.415	994.465	-0.0775636	0.874304
btbd9	ENSDARG00000068983	557659	84.1796	158.257	143.682	117.481	124.376	139.661	-0.0173187	0.987457
btc	ENSDARG00000098112	503869	11.8842	25.7167	34.6819	0	19.7423	9.90503	-1.28574	0.577426
btd	ENSDARG00000099596	555376	15.8456	0	10.9	2.9617	2.96134	7.92403	-0.949834	0.805322
btf3	ENSDARG00000035400	556625	1451.85	974.269	945.329	1655.59	955.526	1228.22	0.187493	0.770362
btf3l4	ENSDARG00000089681	393667	111.909	89.0195	75.3092	201.396	92.7887	90.1358	0.476426	0.590948
btg1	ENSDARG00000027249	114432	1768.76	2168.12	2324.68	1679.29	2099.59	2346.5	-0.0317272	0.956904
btg2	ENSDARG00000020298	30079	1976.74	2544.97	2530.79	1864.89	2464.82	2593.14	-0.0267712	0.965258
btg3	ENSDARG00000069065	492479	200.05	150.344	193.228	208.306	199.397	271.398	0.321006	0.556407
btk	ENSDARG00000004433	568653	68.334	43.5206	40.6273	569.634	311.928	181.262	2.80122	4.97042e-09
btr01	ENSDARG00000051965	563047	33.6718	62.3136	21.8	0	18.7552	28.7246	-1.31091	0.519053
btr04	ENSDARG00000095113	767728	107.948	90.9977	84.2274	101.685	83.9047	91.1263	-0.0332762	0.975359
btr07	ENSDARG00000105558	100151764	2.97105	18.793	24.7728	18.7574	42.4459	46.5537	1.21131	0.419948
btr12	ENSDARG00000051809	767681	41.5946	133.529	39.6364	34.5532	61.2011	46.5537	-0.593747	0.651235
btr18	ENSDARG00000103618	100144555	9.90348	0.989105	6.93637	2.9617	2.96134	11.886	-0.00175827	0.99967
btr22	ENSDARG00000100539	100144555	8.91314	0.989105	8.91819	3.94894	9.87114	0	-0.445256	0.927598
btr23	ENSDARG00000099509	100334710	5.94209	32.6405	7.92728	0.987234	2.96134	6.93352	-2.09602	0.312856
btr26	ENSDARG00000105241	100149795	13.8649	11.8693	4.95455	17.7702	19.7423	0	0.289771	0.941494
btr30	ENSDARG00000102591	393394	11.8842	72.2047	35.6728	18.7574	37.5103	50.5157	-0.165569	0.942747
bub1	ENSDARG00000077029	100307076	1129	1040.54	1132.61	782.877	886.428	887.491	-0.36907	0.077864
bub1ba	ENSDARG00000078825	567931	299.085	324.427	311.146	248.783	267.508	247.626	-0.291019	0.434216
bub1bb	ENSDARG00000074927	567006	765.539	755.676	768.946	607.149	559.694	542.796	-0.42175	0.0428474
bub3	ENSDARG00000075883	403012	341.67	290.797	337.9	359.353	282.315	308.047	-0.0310263	0.964751
bud23	ENSDARG00000063596	572367	17.8263	21.7603	29.7273	40.4766	52.317	47.5442	1.01771	0.213472
bud31	ENSDARG00000017084	445383	81.2086	45.4988	69.3637	73.0553	55.2784	60.4207	-0.0548317	0.967733
bves	ENSDARG00000058548	415107	28.7201	27.6949	13.8727	1.97447	18.7552	5.94302	-1.39782	0.42356
BX000363.1	ENSDARG00000088631	100535969	5.94209	0	0	9.87234	28.6263	9.90503	3.02621	0.194545
BX000438.1	ENSDARG00000097767		13.8649	24.7276	28.7364	30.6043	48.3686	35.6581	0.767717	0.502437
BX000438.2	ENSDARG00000098011		24.7587	29.6732	31.7091	17.7702	41.4588	38.6296	0.183963	0.917228
BX000451.1	ENSDARG00000097896		143.601	172.104	221.964	141.174	175.706	214.939	-0.0158032	0.987457
BX000534.1	ENSDARG00000095072	100537665	2673.94	915.911	627.246	259.643	287.25	477.423	-2.04159	0.0351787
BX000701.1	ENSDARG00000099172	101882267	197.079	78.1393	124.855	84.9021	89.8274	98.0598	-0.552473	0.46953
BX000701.2	ENSDARG00000105074	101884528	130.726	59.3463	74.3183	68.1191	72.0593	149.566	0.13206	0.927598
BX000981.4	ENSDARG00000094304		0	5.93463	12.8818	3.94894	7.89691	1.98101	-0.444357	0.926062
BX001014.1	ENSDARG00000096704		10.8938	0	0	0	0	0	-4.3201	1
BX001023.1	ENSDARG00000098673		33.6718	27.6949	24.7728	22.7064	20.7294	12.8765	-0.613122	0.658472
BX001030.1	ENSDARG00000093671		4.95174	30.6623	13.8727	16.783	9.87114	5.94302	-0.602247	0.814857
BX004769.1	ENSDARG00000097970		21.7877	4.94553	3.96364	0	5.92268	1.98101	-1.95736	0.512217
BX004779.1	ENSDARG00000096584		0.990348	4.94553	0.99091	0	9.87114	5.94302	1.19078	0.802397
BX004785.2	ENSDARG00000093487		12.8745	3.95642	4.95455	0	0	0	-5.32	0.0786835
BX004823.1	ENSDARG00000098535	101887093	8.91314	23.7385	8.91819	19.7447	5.92268	14.8575	-0.0368258	0.989116
BX004873.1	ENSDARG00000100864		0	0	13.8727	13.8213	1.97423	0	0.187428	0.979857
BX004962.2	ENSDARG00000095141		0.990348	10.8802	0	2.9617	10.8583	0.990503	0.31921	0.95561
BX004980.1	ENSDARG00000099680		56.4499	125.616	17.8364	0	24.6778	0	-3.01793	0.575679
BX004981.1	ENSDARG00000092315	101884570	0.990348	6.92374	5.94546	10.8596	0.987114	14.8575	0.946042	0.788286
BX004991.1	ENSDARG00000096896		0	0.989105	4.95455	10.8596	9.87114	31.6961	3.14106	0.0968029
BX004999.1	ENSDARG00000096792	103910262	0.990348	23.7385	32.7	14.8085	37.5103	18.8196	0.308881	0.917851
BX004999.2	ENSDARG00000097471		0	0	2.97273	0	9.87114	0	1.73167	1
BX005003.1	ENSDARG00000098435	564205	67.3437	44.5097	54.5001	75.0298	30.6005	39.6201	-0.195664	0.898157
BX005005.1	ENSDARG00000117551		11.8842	52.4226	42.6091	116.494	61.2011	49.5252	1.08762	0.291925
BX005005.2	ENSDARG00000117566		20.7973	44.5097	15.8546	119.455	96.7372	51.5062	1.72169	0.0162751
BX005011.1	ENSDARG00000117628		0	10.8802	10.9	0	0	0.990503	-4.35787	0.27672
BX005012.4	ENSDARG00000097237		0	4.94553	9.9091	5.9234	0.987114	4.95252	-0.324466	0.95037
BX005048.1	ENSDARG00000097670	108181625	9.90348	4.94553	8.91819	6.91064	4.93557	0	-1.00421	0.778467
BX005056.1	ENSDARG00000105566		114.88	186.941	224.937	92.8	144.119	117.87	-0.570176	0.35097
BX005073.3	ENSDARG00000113027		9.90348	73.1938	48.5546	30.6043	37.5103	41.6011	-0.263002	0.899963
BX005082.1	ENSDARG00000098558		9.90348	0	0.99091	3.94894	0	1.98101	-0.877462	1
BX005085.1	ENSDARG00000089947		117.851	55.3899	83.2365	61.2085	73.0464	87.1643	-0.212066	0.859884
BX005085.2	ENSDARG00000098122		116.861	85.0631	65.4001	90.8255	77.982	111.927	0.070573	0.952821
BX005085.3	ENSDARG00000103450		71.3051	38.5751	45.5819	47.3872	48.3686	75.2783	0.137675	0.924171
BX005085.4	ENSDARG00000110003		95.0735	102.867	111.973	61.2085	92.7887	104.003	-0.264536	0.766831
BX005085.5	ENSDARG00000114108		132.707	103.856	120.891	106.621	83.9047	113.908	-0.231648	0.77168
BX005085.6	ENSDARG00000115220		11.8842	25.7167	34.6819	20.7319	32.5748	56.4587	0.602628	0.700768
BX005085.7	ENSDARG00000117076	560099	94.0831	85.0631	68.3728	88.8511	75.0207	88.1548	0.0260136	0.982952
BX005105.1	ENSDARG00000090159	100003043	0	10.8802	0	5.9234	0.987114	0	-0.654766	1
BX005108.1	ENSDARG00000095721		3.96139	15.8257	7.92728	2.9617	0	0	-3.22551	0.261604
BX005108.2	ENSDARG00000095810		22.778	37.586	44.591	57.2596	33.5619	72.3067	0.636185	0.561828
BX005108.3	ENSDARG00000095965		1.9807	0	0.99091	22.7064	0.987114	0	2.99542	0.483104
BX005124.2	ENSDARG00000099578		29.7105	28.6841	14.8637	17.7702	31.5876	16.8386	-0.146203	0.945175
BX005129.1	ENSDARG00000096913	101886735	3.96139	4.94553	0.99091	12.834	5.92268	5.94302	1.31923	0.637821
BX005129.5	ENSDARG00000098020		0	0	0	0	0	8.91453	4.02802	1
BX005153.1	ENSDARG00000092528	103909741	27.7298	41.5424	27.7455	27.6426	30.6005	50.5157	0.164691	0.921686
BX005183.2	ENSDARG00000097382		0	0	0	14.8085	2.96134	0	5.02344	1
BX005183.3	ENSDARG00000097610		11.8842	5.93463	12.8818	4.93617	13.8196	31.6961	0.716545	0.766872
BX005210.1	ENSDARG00000094457		52.4885	86.0522	48.5546	51.3362	76.0078	57.4492	-0.0178827	0.989116
BX005228.1	ENSDARG00000105465	107195253	223.819	416.413	490.501	253.719	428.407	403.135	-0.0592209	0.955125
BX005234.1	ENSDARG00000097761		3.96139	18.793	4.95455	5.9234	5.92268	6.93352	-0.561317	0.861659
BX005245.1	ENSDARG00000099932	103911727	0	15.8257	13.8727	4.93617	13.8196	14.8575	0.17858	0.965343
BX005254.1	ENSDARG00000094560		0	5.93463	16.8455	7.89787	3.94846	0	-0.94311	0.85361
BX005254.2	ENSDARG00000096956		19.807	34.6187	28.7364	1.97447	15.7938	15.8481	-1.30689	0.391647
BX005254.3	ENSDARG00000097150		112.9	126.605	83.2365	49.3617	77.982	70.3257	-0.707322	0.239383
BX005275.2	ENSDARG00000096455	110437797	0	0	0	0	6.9098	11.886	5.10429	1
BX005283.1	ENSDARG00000093667	110438998	120.823	119.682	103.055	62.1957	94.7629	151.547	-0.155336	0.895591
BX005286.1	ENSDARG00000098509		1.9807	21.7603	38.6455	11.8468	12.8325	29.7151	-0.197848	0.949219
BX005286.3	ENSDARG00000103745		9.90348	13.8475	12.8818	12.834	7.89691	15.8481	-0.00222156	0.99967
BX005294.1	ENSDARG00000101338		165.388	133.529	127.827	71.0808	92.7887	85.1833	-0.776927	0.0720148
BX005294.2	ENSDARG00000109361		39.6139	60.3354	55.491	31.5915	100.686	53.4872	0.257127	0.868217
BX005301.1	ENSDARG00000093691		0.990348	0	4.95455	9.87234	0	22.7816	2.45766	0.498661
BX005309.1	ENSDARG00000093535	100536065	256.5	227.494	232.864	268.528	392.871	372.429	0.528229	0.13211
BX005319.1	ENSDARG00000105738		2.97105	0	8.91819	15.7957	6.9098	8.91453	1.41139	0.635912
BX005329.2	ENSDARG00000092996	110439250	57.4402	33.6296	44.591	21.7191	56.2655	53.4872	-0.0452708	0.98002
BX005336.1	ENSDARG00000102693		9.90348	27.6949	46.5728	32.5787	5.92268	11.886	-0.740197	0.724419
BX005340.1	ENSDARG00000092373		34.6622	32.6405	0	0	38.4974	13.867	-0.362061	0.965098
BX005351.1	ENSDARG00000096957		17.8263	11.8693	21.8	0.987234	19.7423	5.94302	-0.94898	0.701665
BX005355.1	ENSDARG00000091887	101885541	0.990348	9.89105	4.95455	5.9234	3.94846	2.97151	-0.302173	0.94519
BX005367.1	ENSDARG00000104547		8.91314	13.8475	0.99091	6.91064	9.87114	8.91453	0.113435	0.976064
BX005367.2	ENSDARG00000105143		0	3.95642	1.98182	0	12.8325	0	1.11172	1
BX005376.1	ENSDARG00000098409		78.2375	57.3681	74.3183	61.2085	71.0722	55.4682	-0.161012	0.88823
BX005380.1	ENSDARG00000110290		9.90348	12.8584	9.9091	0.987234	2.96134	6.93352	-1.58648	0.480286
BX005380.2	ENSDARG00000110454		13.8649	18.793	10.9	18.7574	24.6778	47.5442	1.06246	0.399122
BX005389.1	ENSDARG00000117272		2.97105	16.8148	3.96364	0	3.94846	10.8955	-0.678339	0.878862
BX005389.2	ENSDARG00000117368		4.95174	29.6732	5.94546	0	7.89691	13.867	-0.898704	0.796866
BX005392.3	ENSDARG00000097929	101886765	25.7491	1.97821	3.96364	3.94894	8.88402	10.8955	-0.41749	0.909194
BX005399.3	ENSDARG00000117375		13.8649	16.8148	5.94546	13.8213	3.94846	6.93352	-0.568139	0.836142
BX005417.1	ENSDARG00000094215	108183423	0	1.97821	2.97273	0	7.89691	17.8291	2.37737	0.530874
BX005417.2	ENSDARG00000102480	571721	0	14.8366	14.8637	6.91064	10.8583	1.98101	-0.588506	0.888808
BX005421.3	ENSDARG00000114309		0	29.6732	7.92728	10.8596	6.9098	19.8101	-0.000945305	0.99967
BX005443.1	ENSDARG00000117629		0	0	0.99091	7.89787	0	1.98101	3.21462	1
BX005445.1	ENSDARG00000095064		60.4113	92.9759	63.4183	27.6426	35.5361	66.3637	-0.743116	0.406144
BX005450.1	ENSDARG00000097992		13.8649	93.965	116.927	78.9787	109.57	143.623	0.563544	0.699812
BX005461.3	ENSDARG00000097429		0	10.8802	10.9	0.987234	6.9098	0.990503	-1.29297	0.76413
BX072554.2	ENSDARG00000105561		13.8649	61.3245	46.5728	19.7447	48.3686	39.6201	-0.176636	0.932401
BX072564.1	ENSDARG00000099925		10.8938	8.90195	7.92728	20.7319	26.6521	21.7911	1.31917	0.269008
BX072570.1	ENSDARG00000096697		0.990348	10.8802	1.98182	3.94894	4.93557	0	-0.640608	0.904575
BX072576.1	ENSDARG00000078204	101885642	0	0.989105	3.96364	7.89787	6.9098	0	1.58029	0.76413
BX072576.2	ENSDARG00000090181	100534958	23.7684	19.7821	5.94546	18.7574	16.7809	15.8481	0.0540522	0.984801
BX072577.1	ENSDARG00000104924	100536537	5.94209	8.90195	10.9	8.88511	13.8196	8.91453	0.29662	0.915296
BX085193.2	ENSDARG00000093824		4.95174	29.6732	19.8182	18.7574	20.7294	35.6581	0.464815	0.832613
BX088538.1	ENSDARG00000089318		90.1217	92.9759	75.3092	49.3617	71.0722	70.3257	-0.437926	0.568441
BX088544.1	ENSDARG00000102428		0	19.7821	13.8727	10.8596	19.7423	8.91453	0.231645	0.951292
BX088583.1	ENSDARG00000100930		7.92279	17.8039	15.8546	10.8596	22.7036	13.867	0.189886	0.939904
BX088583.2	ENSDARG00000101555		0	31.6514	12.8818	33.566	29.6134	15.8481	0.827443	0.761499
BX088587.1	ENSDARG00000104695	101882633	53.4788	39.5642	52.5183	25.6681	33.5619	28.7246	-0.726768	0.404494
BX088596.1	ENSDARG00000099054	100537976	35.6525	37.586	34.6819	11.8468	34.549	21.7911	-0.662388	0.615395
BX088603.1	ENSDARG00000099561		42.585	68.2483	35.6728	50.3489	19.7423	34.6676	-0.483921	0.716692
BX088644.1	ENSDARG00000096741		0.990348	19.7821	16.8455	6.91064	25.665	17.8291	0.422105	0.894532
BX088686.1	ENSDARG00000096774		47.5367	70.2265	77.291	40.4766	68.1109	57.4492	-0.232379	0.851121
BX088688.1	ENSDARG00000096502		0	24.7276	7.92728	0	5.92268	2.97151	-1.87639	0.625875
BX088688.3	ENSDARG00000097598		15.8456	21.7603	9.9091	9.87234	20.7294	22.7816	0.16789	0.945184
BX088707.1	ENSDARG00000101935		1803.42	1424.31	1366.47	2003.1	1287.2	1225.25	-0.0249074	0.973447
BX088707.3	ENSDARG00000117253		123.794	172.104	255.655	33.566	141.157	206.025	-0.534697	0.664404
BX088709.1	ENSDARG00000093338		65.363	23.7385	24.7728	13.8213	52.317	62.4017	0.174736	0.9364
BX088712.1	ENSDARG00000112493		3.96139	2.96732	0.99091	6.91064	7.89691	18.8196	2.08592	0.317022
BX088712.2	ENSDARG00000113519	100332323	0	0	7.92728	12.834	0	0	0.695234	0.9364
BX088728.1	ENSDARG00000101335		12.8745	38.5751	23.7818	11.8468	35.5361	50.5157	0.379839	0.857516
BX119909.1	ENSDARG00000093431		72.2954	55.3899	23.7818	48.3745	26.6521	41.6011	-0.377129	0.800121
BX119915.2	ENSDARG00000096794		0	3.95642	5.94546	8.88511	0	0	-0.156166	1
BX119963.4	ENSDARG00000117577	103910419	0	8.90195	12.8818	4.93617	18.7552	8.91453	0.581915	0.879447
BX119992.1	ENSDARG00000096775	101886561	4.95174	17.8039	9.9091	0.987234	1.97423	7.92403	-1.58583	0.534563
BX120006.1	ENSDARG00000097089		0	0	9.9091	0	6.9098	0	-0.519906	1
BX247865.2	ENSDARG00000110722		0	9.89105	14.8637	0	3.94846	8.91453	-0.944663	0.847576
BX248082.1	ENSDARG00000105408		37.6332	46.4879	51.5273	98.7234	79.9562	62.4017	0.829693	0.192076
BX248097.3	ENSDARG00000117467		0	10.8802	0	0.987234	0	0	-3.3566	1
BX248108.1	ENSDARG00000114306	560089	20.7973	0	0	0	0.987114	0.990503	-3.39477	0.512217
BX248118.1	ENSDARG00000094102		0	13.8475	0	22.7064	0	3.96201	0.945432	0.879339
BX248122.1	ENSDARG00000112449	103910472	9.90348	28.6841	9.9091	55.2851	26.6521	25.7531	1.15087	0.368272
BX248128.1	ENSDARG00000105019		0	7.91284	10.9	3.94894	0	3.96201	-1.24992	0.796909
BX248128.2	ENSDARG00000112606		17.8263	8.90195	6.93637	9.87234	0	1.98101	-1.50579	0.613705
BX248238.1	ENSDARG00000096724		0	8.90195	0	5.9234	10.8583	2.97151	1.14974	0.816033
BX248324.1	ENSDARG00000096489		14.8552	25.7167	41.6182	35.5404	66.1366	58.4397	0.962103	0.329841
BX248331.2	ENSDARG00000102650		7.92279	2.96732	3.96364	0	7.89691	8.91453	0.178533	0.972248
BX248410.1	ENSDARG00000090038	101884775	0	0	2.97273	8.88511	0	0	1.57983	1
BX248410.3	ENSDARG00000114678		0	0	0	8.88511	18.7552	7.92403	6.02443	0.00947955
BX248418.1	ENSDARG00000096569		22.778	30.6623	57.4728	48.3745	41.4588	53.4872	0.369829	0.788286
BX248418.2	ENSDARG00000097375		8.91314	3.95642	10.9	0	2.96134	0.990503	-2.58829	0.349433
BX248497.1	ENSDARG00000092673		36.6429	94.9541	81.2547	39.4894	57.2526	61.4112	-0.42857	0.712038
BX248501.1	ENSDARG00000074519		23.7684	16.8148	20.8091	6.91064	26.6521	12.8765	-0.402647	0.85734
BX248510.2	ENSDARG00000095610	108191553	0	3.95642	13.8727	3.94894	11.8454	7.92403	0.411838	0.925149
BX248511.1	ENSDARG00000092826		0	22.7494	14.8637	9.87234	20.7294	8.91453	0.0712212	0.986406
BX248512.2	ENSDARG00000095343		0	0.989105	0	0	0	10.8955	3.35573	1
BX248515.1	ENSDARG00000055431	569077	1.9807	19.7821	1.98182	2.9617	11.8454	7.92403	-0.0630611	0.987604
BX248521.2	ENSDARG00000105511		19.807	21.7603	9.9091	20.7319	7.89691	25.7531	0.0790828	0.975527
BX255896.1	ENSDARG00000098151		1.9807	0	22.7909	7.89787	4.93557	0.990503	-0.841294	0.860687
BX255908.1	ENSDARG00000099832		7.92279	10.8802	11.8909	0	15.7938	0	-0.958402	0.830996
BX255944.1	ENSDARG00000117724		8.91314	17.8039	8.91819	4.93617	9.87114	3.96201	-0.924834	0.689893
BX255963.2	ENSDARG00000097857		0	11.8693	10.9	0	2.96134	1.98101	-2.20389	0.579221
BX255967.1	ENSDARG00000105586		18.8166	49.4553	20.8091	54.2979	31.5876	14.8575	0.177523	0.935959
BX276101.1	ENSDARG00000096639		0	5.93463	9.9091	0	0	0	-4.86053	1
BX276102.1	ENSDARG00000098373		3.96139	10.8802	6.93637	3.94894	8.88402	3.96201	-0.374786	0.914626
BX276103.1	ENSDARG00000093741		0	0.989105	17.8364	1.97447	0	2.97151	-1.92855	0.699812
BX276103.2	ENSDARG00000093921		29.7105	42.5315	5.94546	0	26.6521	38.6296	-0.260344	0.944008
BX276105.1	ENSDARG00000115856		3.96139	1.97821	12.8818	7.89787	11.8454	4.95252	0.392096	0.9123
BX276107.1	ENSDARG00000113137	101886608	0	10.8802	16.8455	2.9617	18.7552	33.6771	0.998453	0.752054
BX279523.1	ENSDARG00000096810	101887075	1.9807	6.92374	5.94546	10.8596	4.93557	20.8006	1.30105	0.574607
BX279523.3	ENSDARG00000097362		8.91314	5.93463	23.7818	12.834	28.6263	27.7341	0.841011	0.651235
BX284620.1	ENSDARG00000117470		9.90348	5.93463	3.96364	1.97447	20.7294	0	0.197455	0.967979
BX284635.1	ENSDARG00000092456	101885622	10.8938	3.95642	24.7728	8.88511	11.8454	12.8765	-0.237524	0.9364
BX284638.1	ENSDARG00000116871	568650	3123.56	2710.15	2852.83	2504.61	2563.53	2357.4	-0.226281	0.309786
BX284666.1	ENSDARG00000092477		19.807	20.7712	10.9	3.94894	13.8196	11.886	-0.795792	0.692946
BX284696.1	ENSDARG00000099710		81.2086	101.878	64.4092	83.9149	133.26	103.012	0.371495	0.651703
BX294100.1	ENSDARG00000097158		4.95174	2.96732	0.99091	2.9617	18.7552	0	1.28542	0.767466
BX294113.1	ENSDARG00000092995		0	22.7494	0	0.987234	2.96134	0	-2.52614	0.639089
BX294160.1	ENSDARG00000097868		6.93244	16.8148	17.8364	4.93617	10.8583	4.95252	-1.00301	0.637668
BX294165.1	ENSDARG00000093545		43.5753	45.4988	15.8546	0	21.7165	29.7151	-1.02879	0.660233
BX294165.2	ENSDARG00000094712		0.990348	16.8148	10.9	12.834	5.92268	2.97151	-0.401655	0.914764
BX294178.1	ENSDARG00000101818		48.5271	36.5969	21.8	12.834	30.6005	34.6676	-0.453236	0.783262
BX294178.2	ENSDARG00000104955		29.7105	8.90195	13.8727	2.9617	16.7809	9.90503	-0.823958	0.719328
BX294178.3	ENSDARG00000117509		1.9807	4.94553	22.7909	12.834	10.8583	6.93352	0.0435946	0.989299
BX294189.1	ENSDARG00000093137		4.95174	20.7712	14.8637	26.6553	32.5748	36.6486	1.24012	0.307659
BX294379.1	ENSDARG00000092950		2.97105	52.4226	39.6364	32.5787	34.549	27.7341	-0.00256356	0.99967
BX294387.1	ENSDARG00000094798		0	4.94553	15.8546	4.93617	9.87114	1.98101	-0.308954	0.949152
BX294434.1	ENSDARG00000061272	564564	123.794	189.908	138.727	122.417	175.706	176.31	0.0684763	0.945175
BX296541.1	ENSDARG00000089839	103909012	2.97105	21.7603	6.93637	10.8596	17.768	19.8101	0.612968	0.810516
BX296551.1	ENSDARG00000009079	570014	10.8938	3.95642	8.91819	98.7234	86.866	50.5157	3.31249	6.87194e-07
BX296562.2	ENSDARG00000096747		46.5464	13.8475	33.691	2.9617	3.94846	0.990503	-3.57339	0.00204214
BX321877.1	ENSDARG00000092963		1.9807	13.8475	2.97273	4.93617	10.8583	21.7911	0.999113	0.720801
BX322530.1	ENSDARG00000088741	100537860	366.429	507.411	468.701	542.979	616.946	614.112	0.402061	0.194983
BX322555.1	ENSDARG00000097066		31.6912	65.2809	45.5819	62.1957	67.1237	75.2783	0.521225	0.573539
BX322555.2	ENSDARG00000097074		72.2954	96.9323	104.046	75.0298	109.57	89.1453	0.0024932	0.99967
BX322555.3	ENSDARG00000097247		160.436	106.823	114.946	84.9021	77.982	99.0503	-0.545168	0.340613
BX322555.4	ENSDARG00000097908		27.7298	52.4226	31.7091	32.5787	33.5619	71.3162	0.297135	0.854099
BX322555.5	ENSDARG00000117678		3.96139	4.94553	3.96364	6.91064	0.987114	10.8955	0.545949	0.891126
BX322574.1	ENSDARG00000098353		65.363	60.3354	64.4092	44.4255	38.4974	41.6011	-0.610387	0.405574
BX322575.1	ENSDARG00000095595	101886066	6.93244	1.97821	10.9	0	0	3.96201	-2.32284	0.558933
BX322587.1	ENSDARG00000089636	100002141	0	0	0	16.783	22.7036	17.8291	6.7129	0.000183297
BX322603.1	ENSDARG00000096563	321843	107.948	5.93463	10.9	0	21.7165	13.867	-1.81014	0.45113
BX322618.1	ENSDARG00000096508		55.4595	26.7058	57.4728	225.089	135.235	82.2118	1.66418	0.00551289
BX322631.1	ENSDARG00000100449	568436	0	0	2.97273	11.8468	6.9098	7.92403	3.16644	0.254682
BX322657.2	ENSDARG00000111659	100006266	65.363	19.7821	33.691	28.6298	23.6907	57.4492	-0.11456	0.955125
BX322657.3	ENSDARG00000113365	110438262	21.7877	49.4553	40.6273	42.4511	49.3557	44.5726	0.285778	0.841278
BX322661.1	ENSDARG00000094186		81.2086	53.4117	40.6273	12.834	11.8454	11.886	-2.26083	0.000797752
BX322661.2	ENSDARG00000095041	108191292	12.8745	5.93463	2.97273	1.97447	2.96134	13.867	-0.212467	0.95876
BX322665.2	ENSDARG00000095707		99.0348	86.0522	80.2637	58.2468	45.4072	75.2783	-0.568561	0.414999
BX323022.1	ENSDARG00000116593	101882881	4.95174	6.92374	13.8727	84.9021	57.2526	47.5442	2.8813	6.23323e-05
BX323031.1	ENSDARG00000098668		0	3.95642	1.98182	7.89787	2.96134	0.990503	0.996755	1
BX323031.2	ENSDARG00000105122		0	19.7821	4.95455	19.7447	12.8325	5.94302	0.638924	0.86431
BX323060.3	ENSDARG00000105651		80.2182	150.344	118.909	87.8638	105.621	112.917	-0.189784	0.8505
BX323065.1	ENSDARG00000095365		9.90348	14.8366	6.93637	6.91064	8.88402	9.90503	-0.301765	0.914626
BX323067.1	ENSDARG00000097984	108181550	0	1.97821	4.95455	10.8596	14.8067	23.7721	2.83422	0.109371
BX323074.1	ENSDARG00000092319		56.4499	38.5751	35.6728	5.9234	18.7552	18.8196	-1.58731	0.0876
BX323074.2	ENSDARG00000095432		128.745	121.66	132.782	80.9532	122.402	120.841	-0.2412	0.759371
BX323082.1	ENSDARG00000032077	564425	0	21.7603	13.8727	17.7702	13.8196	25.7531	0.686315	0.818522
BX323453.1	ENSDARG00000100563		2.97105	17.8039	10.9	2.9617	6.9098	20.8006	-0.046657	0.989116
BX323458.1	ENSDARG00000078220		10.8938	5.93463	9.9091	5.9234	8.88402	0.990503	-0.758835	0.808206
BX323544.1	ENSDARG00000098896		7.92279	27.6949	27.7455	15.7957	20.7294	39.6201	0.265	0.906958
BX323555.2	ENSDARG00000039891	108180716	0	0	0	0	9.87114	0	4.17526	1
BX323556.1	ENSDARG00000090171		0	19.7821	3.96364	13.8213	6.9098	13.867	0.542885	0.890197
BX323559.2	ENSDARG00000093443	110438071	20.7973	0	2.97273	0	0	0	-5.44576	0.176886
BX323559.4	ENSDARG00000094100	101886824	0.990348	11.8693	4.95455	0	0	0	-5.0297	1
BX323560.1	ENSDARG00000117382		0	8.90195	0.99091	9.87234	3.94846	21.7911	1.84756	0.540657
BX323586.3	ENSDARG00000097855		0	6.92374	5.94546	33.566	25.665	9.90503	2.4255	0.143646
BX323590.1	ENSDARG00000079250	797291	168.359	150.344	220.973	136.238	176.693	208.996	-0.0482595	0.960325
BX323590.2	ENSDARG00000095388	100536104	1.9807	21.7603	3.96364	0	9.87114	4.95252	-0.902287	0.829386
BX323820.1	ENSDARG00000111326	561298	0	4.94553	7.92728	0	10.8583	4.95252	0.296611	0.960427
BX323824.1	ENSDARG00000097879		0	9.89105	8.91819	50.3489	50.3428	28.7246	2.78247	0.0148598
BX323839.1	ENSDARG00000095518	108190353	0	0	0	0	0.987114	9.90503	4.31709	1
BX323875.1	ENSDARG00000094149		4.95174	2.96732	3.96364	17.7702	6.9098	10.8955	1.58208	0.422336
BX323880.1	ENSDARG00000094081		19.807	11.8693	2.97273	9.87234	1.97423	1.98101	-1.3251	0.629308
BX323884.1	ENSDARG00000091897		0	12.8584	16.8455	37.5149	17.768	19.8101	1.33805	0.531208
BX323889.1	ENSDARG00000096718		62.392	67.2592	89.1819	73.0553	86.866	100.041	0.248455	0.792961
BX323991.1	ENSDARG00000117665		0	0	10.9	0	4.93557	6.93352	0.122888	0.987457
BX323994.2	ENSDARG00000100423		9.90348	16.8148	27.7455	29.617	39.4846	24.7626	0.785353	0.568142
BX324003.1	ENSDARG00000096499		0	12.8584	1.98182	0	6.9098	0	-1.10265	0.874676
BX324003.2	ENSDARG00000109802		0	10.8802	17.8364	7.89787	0	5.94302	-1.05299	0.815689
BX324006.2	ENSDARG00000117224		6.93244	13.8475	11.8909	1.97447	19.7423	14.8575	0.162773	0.961196
BX324007.2	ENSDARG00000100586		12.8745	0	1.98182	14.8085	0	1.98101	0.17659	0.977473
BX324123.2	ENSDARG00000095421		0	0.989105	0.99091	24.6808	14.8067	5.94302	4.52004	0.01629
BX324132.1	ENSDARG00000068792		66.3533	29.6732	9.9091	21.7191	12.8325	5.94302	-1.38726	0.35652
BX324132.3	ENSDARG00000111246		750.684	556.866	566.801	1395.95	849.905	970.693	0.779127	0.007783
BX324137.1	ENSDARG00000093919		21.7877	9.89105	7.92728	7.89787	12.8325	9.90503	-0.370501	0.889121
BX324142.1	ENSDARG00000114711	101884110	16.8359	58.3572	16.8455	26.6553	24.6778	46.5537	0.0887428	0.969653
BX324146.1	ENSDARG00000096422		4.95174	5.93463	7.92728	12.834	1.97423	22.7816	0.998445	0.704821
BX324164.4	ENSDARG00000097507	101884690	16.8359	0	13.8727	12.834	5.92268	0	-0.711051	0.885083
BX324206.1	ENSDARG00000097206	100320944	0	18.793	9.9091	0	0	0	-5.71781	0.106828
BX324206.2	ENSDARG00000097663		88.141	87.0413	75.3092	80.9532	53.3041	108.955	-0.0426167	0.973594
BX324212.1	ENSDARG00000098127		0	6.92374	5.94546	0	0.987114	8.91453	-0.378503	0.95339
BX324213.1	ENSDARG00000093873		0	28.6841	0.99091	2.9617	1.97423	6.93352	-1.32222	0.755622
BX324216.2	ENSDARG00000105075	108181150	34.6622	21.7603	20.8091	10.8596	5.92268	12.8765	-1.38086	0.250695
BX324216.3	ENSDARG00000109202	100151570	10.8938	29.6732	17.8364	27.6426	27.6392	8.91453	0.136508	0.955505
BX324224.1	ENSDARG00000103245		19.807	14.8366	0	12.834	6.9098	2.97151	-0.608843	0.877847
BX324227.1	ENSDARG00000097151		0.990348	9.89105	0.99091	8.88511	7.89691	0	0.499326	0.926433
BX324227.2	ENSDARG00000109743		326.815	289.808	350.782	282.349	369.181	365.496	0.0721608	0.913471
BX324227.3	ENSDARG00000110949		326.815	289.808	350.782	282.349	369.181	365.496	0.0721608	0.913471
BX324233.1	ENSDARG00000114675		38.6236	33.6296	47.5637	22.7064	49.3557	53.4872	0.0673875	0.969795
BX465186.2	ENSDARG00000094461		5.94209	15.8257	16.8455	12.834	8.88402	13.867	-0.117878	0.966115
BX465205.2	ENSDARG00000097604		6.93244	22.7494	17.8364	39.4894	44.4201	34.6676	1.31924	0.183063
BX465206.1	ENSDARG00000095601	108180171	2.97105	19.7821	9.9091	11.8468	17.768	19.8101	0.597496	0.804684
BX465208.1	ENSDARG00000097392		12.8745	3.95642	13.8727	0	12.8325	9.90503	-0.433345	0.912208
BX465227.1	ENSDARG00000097825	100535512	68.334	78.1393	48.5546	82.9277	76.9949	111.927	0.479054	0.541027
BX465228.1	ENSDARG00000040200	100005907	14.8552	9.89105	0.99091	19.7447	3.94846	15.8481	0.619425	0.848041
BX465228.2	ENSDARG00000115830		35.6525	16.8148	23.7818	42.4511	33.5619	33.6771	0.524689	0.688153
BX465834.1	ENSDARG00000095715	100538174	14.8552	56.379	57.4728	30.6043	63.1753	51.5062	0.174787	0.927221
BX465836.1	ENSDARG00000098213	101886469	2.97105	28.6841	55.491	10.8596	26.6521	20.8006	-0.579628	0.816322
BX465838.1	ENSDARG00000093993		0	7.91284	3.96364	0.987234	4.93557	10.8955	0.501689	0.92022
BX465848.1	ENSDARG00000114947		8.91314	1.97821	8.91819	8.88511	0	4.95252	-0.517566	0.908382
BX465848.2	ENSDARG00000116920		38.6236	39.5642	14.8637	58.2468	18.7552	14.8575	-0.0185534	0.993503
BX465862.1	ENSDARG00000093427		9.90348	7.91284	6.93637	0	3.94846	2.97151	-1.83887	0.515354
BX465862.2	ENSDARG00000096099		0.990348	10.8802	11.8909	4.93617	1.97423	4.95252	-1.00226	0.768856
BX465862.3	ENSDARG00000096147		0	15.8257	0	8.88511	8.88402	0	0.167107	0.982052
BX469901.1	ENSDARG00000101615		8.91314	3.95642	0	24.6808	13.8196	16.8386	2.10428	0.258783
BX469902.1	ENSDARG00000097953	108191330	18.8166	3.95642	0.99091	0.987234	3.94846	6.93352	-1.00174	0.793052
BX469908.1	ENSDARG00000096617		16.8359	12.8584	21.8	11.8468	15.7938	50.5157	0.601835	0.761388
BX469910.2	ENSDARG00000096127		26.7394	15.8257	19.8182	8.88511	0	5.94302	-2.0729	0.228512
BX469925.1	ENSDARG00000087592		39.6139	74.1829	61.4364	26.6553	62.1882	81.2213	-0.0432701	0.980837
BX469925.2	ENSDARG00000092454		0	5.93463	0	2.9617	13.8196	50.5157	3.5028	0.137382
BX469925.3	ENSDARG00000094103		11.8842	61.3245	28.7364	24.6808	39.4846	17.8291	-0.314178	0.8852
BX469930.1	ENSDARG00000092358		431.792	370.914	238.809	399.83	337.593	203.053	-0.147201	0.876569
BX470116.1	ENSDARG00000117423		0	18.793	16.8455	32.5787	21.7165	32.6866	1.28724	0.524763
BX470182.1	ENSDARG00000112132		66.3533	94.9541	118.909	58.2468	100.686	124.803	0.0179658	0.988948
BX470188.1	ENSDARG00000088165		66.3533	64.2918	45.5819	102.672	93.7758	121.832	0.852811	0.0978017
BX470189.1	ENSDARG00000067658	100150296	71.3051	73.1938	78.2819	116.494	72.0593	87.1643	0.307577	0.721522
BX470211.1	ENSDARG00000105629		6.93244	30.6623	28.7364	20.7319	3.94846	16.8386	-0.675977	0.770565
BX470238.1	ENSDARG00000096417		20.7973	41.5424	42.6091	7.89787	38.4974	45.5632	-0.190708	0.932295
BX470242.1	ENSDARG00000095808		2.97105	18.793	26.7546	23.6936	47.3815	13.867	0.808012	0.69381
BX470259.1	ENSDARG00000111506	101886309	120.823	142.431	148.637	124.391	144.119	177.3	0.114132	0.895001
BX470259.2	ENSDARG00000116271	795633	221.838	272.004	395.373	367.251	374.116	450.679	0.422834	0.365571
BX470259.3	ENSDARG00000116723		60.4113	37.586	33.691	33.566	26.6521	31.6961	-0.518775	0.654927
BX470264.1	ENSDARG00000097892		48.5271	15.8257	16.8455	32.5787	30.6005	24.7626	0.11515	0.956774
BX510301.2	ENSDARG00000117694		14.8552	38.5751	21.8	18.7574	8.88402	20.8006	-0.635178	0.716776
BX510319.1	ENSDARG00000096772		12.8745	17.8039	15.8546	0	13.8196	0.990503	-1.65144	0.545088
BX510324.1	ENSDARG00000092853		75.2665	53.4117	39.6364	9.87234	15.7938	8.91453	-2.283	0.00127525
BX510324.2	ENSDARG00000094659		43.5753	45.4988	30.7182	4.93617	34.549	23.7721	-0.921265	0.527206
BX510649.1	ENSDARG00000097932		16.8359	9.89105	5.94546	0	1.97423	10.8955	-1.34452	0.671528
BX510657.1	ENSDARG00000093899	100270729	179.253	129.573	104.046	149.072	178.668	128.765	0.144961	0.879162
BX510909.1	ENSDARG00000104294		19.807	17.8039	0.99091	1.97447	5.92268	4.95252	-1.58702	0.538441
BX510909.2	ENSDARG00000112884		4.95174	9.89105	17.8364	22.7064	33.5619	20.8006	1.23786	0.360053
BX510915.1	ENSDARG00000099630		1.9807	26.7058	3.96364	9.87234	13.8196	24.7626	0.569351	0.856264
BX510917.1	ENSDARG00000092739		0	2.96732	4.95455	27.6426	1.97423	1.98101	1.99602	0.556198
BX510922.1	ENSDARG00000101184		9.90348	1.97821	0.99091	0	0	0.990503	-3.59914	1
BX510922.2	ENSDARG00000104798	101883936	109.929	100.889	124.855	84.9021	125.363	133.718	0.0352665	0.973594
BX510922.3	ENSDARG00000113380	108180795	40.6043	8.90195	0.99091	4.93617	12.8325	9.90503	-0.867692	0.776651
BX510923.1	ENSDARG00000094488		23.7684	7.91284	21.8	21.7191	12.8325	12.8765	-0.173187	0.945175
BX510928.1	ENSDARG00000094703		11.8842	4.94553	2.97273	0	1.97423	0	-3.3255	0.327423
BX510934.1	ENSDARG00000087544		28.7201	10.8802	27.7455	32.5787	20.7294	34.6676	0.38554	0.83078
BX510989.2	ENSDARG00000096287		24.7587	19.7821	21.8	25.6681	23.6907	30.7056	0.271234	0.873838
BX510992.1	ENSDARG00000092257		0	8.90195	6.93637	19.7447	35.5361	17.8291	2.20659	0.168725
BX510992.2	ENSDARG00000096638		0	11.8693	0	1.97447	13.8196	3.96201	0.734956	0.896582
BX511013.1	ENSDARG00000112403	103908633	0	0.989105	2.97273	36.5277	0	0	3.20489	0.466641
BX511018.2	ENSDARG00000100221		121.813	13.8475	21.8	36.5277	0	24.7626	-1.36125	0.764912
BX511023.1	ENSDARG00000092372		45.556	33.6296	50.5364	27.6426	15.7938	21.7911	-0.991853	0.272002
BX511034.1	ENSDARG00000071629		242.635	333.328	376.546	254.706	383.987	381.344	0.0988065	0.903327
BX511034.2	ENSDARG00000071636	100151078	13.8649	12.8584	25.7637	2.9617	12.8325	17.8291	-0.642615	0.784572
BX511034.3	ENSDARG00000093642		9.90348	21.7603	7.92728	3.94894	8.88402	1.98101	-1.41802	0.507754
BX511034.5	ENSDARG00000099364		330.776	434.217	459.782	320.851	396.82	397.192	-0.135661	0.821821
BX511034.7	ENSDARG00000104640	100006875	38.6236	71.2156	118.909	82.9277	67.1237	118.86	0.233349	0.86869
BX511061.1	ENSDARG00000105557	101885004	151.523	154.3	120.891	77.0043	96.7372	141.642	-0.436241	0.524034
BX511066.1	ENSDARG00000099145		0	0	0.99091	0	0.987114	11.886	3.59636	1
BX511075.1	ENSDARG00000097101		8.91314	3.95642	2.97273	19.7447	18.7552	1.98101	1.35359	0.581924
BX511082.1	ENSDARG00000113678		447.637	446.086	370.6	283.336	401.755	403.135	-0.216407	0.67531
BX511089.2	ENSDARG00000094523		14.8552	0	10.9	0	6.9098	9.90503	-0.615198	0.90288
BX511100.5	ENSDARG00000095948		8.91314	23.7385	2.97273	5.9234	4.93557	8.91453	-0.849489	0.758616
BX511100.6	ENSDARG00000095973		10.8938	4.94553	1.98182	0	0	0	-5.03024	1
BX511111.1	ENSDARG00000100491	101887121	0.990348	0	9.9091	12.834	0	0	0.235897	0.976064
BX511111.2	ENSDARG00000101943	101883983	0	0	0	18.7574	4.93557	18.8196	6.28181	0.00478707
BX511111.3	ENSDARG00000117326		0	0	2.97273	1.97447	8.88402	9.90503	2.80455	0.433709
BX511112.1	ENSDARG00000091989		22.778	19.7821	7.92728	13.8213	27.6392	18.8196	0.255735	0.910251
BX511115.1	ENSDARG00000104558		28.7201	0	0	0	0	0	-5.71867	0.235317
BX511128.3	ENSDARG00000102706		32.6815	34.6187	61.4364	73.0553	41.4588	51.5062	0.366981	0.772682
BX511129.1	ENSDARG00000093452	100535312	54.4692	9.89105	23.7818	12.834	12.8325	26.7436	-0.750068	0.685828
BX511129.2	ENSDARG00000112751	101884374	103.987	73.1938	118.909	75.0298	96.7372	80.2308	-0.232586	0.803931
BX511161.1	ENSDARG00000092272		3.96139	0.989105	11.8909	0	0	0	-4.9486	1
BX511173.1	ENSDARG00000095842		0	0.989105	0	19.7447	0	0.990503	4.2843	0.35434
BX511218.1	ENSDARG00000117493		64.3726	109.791	174.4	54.2979	158.925	121.832	-0.0570202	0.972496
BX511223.1	ENSDARG00000101064		9.90348	1.97821	4.95455	0	2.96134	2.97151	-1.50492	0.700445
BX511224.1	ENSDARG00000113243		1162.67	2039.54	1338.72	1378.18	2250.62	1623.43	0.209943	0.736065
BX511227.1	ENSDARG00000102499		0	6.92374	0	0	0.987114	11.886	0.894415	0.904395
[truncated: 18,517 more rows]

## Sheet: 2 RefSeq
ID	NCBI Gene ID	Ensdarg	Nr2f2_y1_WT1	Nr2f2_y1_WT2	Nr2f2_y1_WT3	y1_WT1	y1_WT2	y1_WT3	log2 Fold Change	padj
a1cf	562916	ENSDARG00000002968	19.8154	0.988783	4.95318	0.986633	1.97376	0	-3.12041	0.333124
a2ml	100006972	ENSDARG00000041645	0	4.94391	9.90637	11.8396	4.9344	3.9611	0.481658	0.924537
aaas	378454	ENSDARG00000102274	219.951	127.553	142.652	184.5	172.704	174.288	0.116835	0.908154
aacs	393984	ENSDARG00000012468	79.2616	99.867	126.802	109.516	104.609	107.94	0.0741519	0.953912
aadac	100148912	ENSDARG00000063621	3.96308	21.7532	21.794	67.091	67.1079	62.3873	2.04877	0.0133679
aadat	557979	ENSDARG00000011410	21.7969	53.3943	43.588	17.7594	15.7901	37.6305	-0.738915	0.608023
aaed1	100332791	ENSDARG00000075299	41.6124	10.8766	14.8596	5.9198	0.98688	7.9222	-2.18344	0.186162
aagab	436696	ENSDARG00000117041	84.2155	87.0129	101.045	164.768	95.7274	79.222	0.319331	0.750314
aak1a	568999	ENSDARG00000011855	322.991	251.151	211.996	162.794	175.665	135.668	-0.729476	0.0514618
aak1b	100534954	ENSDARG00000077686	536.998	630.843	618.157	453.851	585.22	552.574	-0.166223	0.724663
aamdc	553802	ENSDARG00000103957	8.91693	1.97757	13.8689	13.8129	8.88192	2.97083	0.0518671	0.992751
aamp	405874	ENSDARG00000045019	186.265	153.261	213.978	277.244	231.917	382.246	0.687476	0.0910616
aanat2	30685	ENSDARG00000079802	11.8892	1.97757	31.7004	8.8797	13.8163	11.8833	-0.398022	0.909984
aar2	431768	ENSDARG00000018658	86.197	75.1475	73.3071	152.928	99.6749	114.872	0.647147	0.242583
aars	324940	ENSDARG00000113882	1695.21	1080.74	1430.48	2164.67	1418.15	1613.16	0.304807	0.501574
aars2	792787	ENSDARG00000071240	130.782	141.396	139.68	151.941	168.757	183.201	0.290963	0.615452
aarsd1	445178	ENSDARG00000015747	42.6031	54.383	35.6629	50.3183	47.3703	42.5818	0.080586	0.96333
aasdh	570338	ENSDARG00000022730	36.6585	50.4279	49.5318	48.345	83.8848	54.4651	0.450537	0.675795
aasdhppt	619247	ENSDARG00000037501	17.8339	5.9327	17.8315	7.89306	13.8163	8.91248	-0.441847	0.879036
aass	556229	ENSDARG00000051816	242.739	239.285	188.221	302.896	344.421	268.365	0.450169	0.242583
aatf	559477	ENSDARG00000109548	104.031	67.2372	126.802	170.687	135.203	163.395	0.654849	0.239739
aatka	100004850	ENSDARG00000078222	983.835	827.611	869.779	639.338	536.863	617.932	-0.579605	0.00539986
aatkb	555739	ENSDARG00000104442	15.8523	49.4391	61.4195	0	18.7507	47.5332	-0.934929	0.732841
abat	378968	ENSDARG00000006031	431.976	383.648	391.302	203.246	201.324	323.82	-0.728602	0.0337772
abca12	558335		1911.2	4003.58	1769.28	612.699	1608.61	1293.3	-1.1285	0.221826
abca1a	558924	ENSDARG00000074635	3678.73	3409.32	3899.15	3023.04	3465.92	3145.11	-0.189603	0.456504
abca1b	100136868	ENSDARG00000079009	1613.96	1520.75	1273.96	1137.59	1122.08	930.859	-0.466539	0.0404599
abca2	100006090	ENSDARG00000013500	47.557	106.789	104.017	569.287	407.582	301.044	2.30631	1.37107e-08
abca3b	564344	ENSDARG00000100524	550.868	721.811	754.865	384.787	556.6	522.865	-0.469581	0.173918
abca4b	555506	ENSDARG00000062661	32.6954	55.3718	21.794	2.9599	4.9344	2.97083	-3.33781	0.000809275
abca5	100151075	ENSDARG00000074041	877.822	1073.82	939.124	648.218	843.783	775.385	-0.35043	0.225007
abcb10	100003744	ENSDARG00000061591	104.031	142.385	119.867	386.76	282.248	245.588	1.32018	5.10733e-05
abcb11a	797269	ENSDARG00000011573	17.8339	48.4503	43.588	17.7594	49.344	63.3776	0.247917	0.910445
abcb4	100136865	ENSDARG00000010936	445.847	409.356	516.122	310.789	339.487	406.013	-0.376584	0.290272
abcb5	798527	ENSDARG00000021787	266.517	431.109	153.549	52.2915	269.418	144.58	-0.868235	0.359766
abcb6a	564067	ENSDARG00000063297	140.689	135.463	94.1105	102.61	135.203	165.376	0.122855	0.912699
abcb6b	100004801	ENSDARG00000074254	276.425	367.827	257.566	270.337	300.998	277.277	-0.0877451	0.910688
abcb7	566515	ENSDARG00000062795	316.056	357.939	362.573	431.159	437.188	350.557	0.233787	0.596293
abcb8	548340	ENSDARG00000056672	50.5293	93.9343	70.3352	76.9574	91.7799	91.1053	0.2746	0.799914
abcb9	570148	ENSDARG00000109326	57.4647	58.3382	99.0637	2057.13	1547.43	1150.7	4.46805	1.33999e-44
abcc1	100002010	ENSDARG00000104719	494.394	498.346	396.255	341.375	373.041	353.528	-0.379211	0.231172
abcc10	556709	ENSDARG00000113210	416.124	432.098	396.255	388.733	381.923	368.382	-0.12772	0.793912
abcc12	568482	ENSDARG00000013050	47.557	28.6747	30.7097	49.3316	15.7901	24.7569	-0.250704	0.906251
abcc13	559093	ENSDARG00000062519	26.7508	41.5289	29.7191	78.9306	89.8061	110.911	1.51268	0.00335656
abcc2	393561	ENSDARG00000116140	257.6	170.071	305.116	101.623	107.57	137.648	-1.07914	0.00613171
abcc3	323301	ENSDARG00000096662	2400.64	2122.92	2185.35	2003.85	2106.99	1789.43	-0.185288	0.510303
abcc4	368620	ENSDARG00000115375	514.21	519.111	532.963	634.405	549.692	557.525	0.153094	0.712791
abcc5	336147	ENSDARG00000061233	1398.97	1833.2	1593.93	1438.51	1409.26	1192.29	-0.256477	0.416279
abcc6a	566555	ENSDARG00000016750	1.98154	20.7644	16.8408	16.7728	18.7507	32.6791	0.78467	0.735532
abcc6b.2	100002917	ENSDARG00000094901	177.348	169.082	206.052	29.599	58.2259	83.1831	-1.69198	0.000386265
abcc8	553281	ENSDARG00000114458	0	6.92148	27.7378	7.89306	19.7376	7.9222	0.0367855	0.995007
abcc9	561160	ENSDARG00000015985	442.874	459.784	744.959	42.4252	121.386	203.997	-2.16342	3.98725e-05
abcd1	566367	ENSDARG00000074876	383.428	411.334	420.03	320.656	410.542	381.256	-0.126972	0.82285
abcd3a	406803	ENSDARG00000110888	230.849	197.757	197.137	241.725	178.625	174.288	-0.0735249	0.936762
abcd3b	100170781	ENSDARG00000002947	8.91693	24.7196	15.8502	63.1445	62.1735	29.7083	1.64736	0.0660354
abcd4	767748	ENSDARG00000061770	35.6677	98.8783	83.2135	70.0509	96.7143	86.1539	0.215902	0.887747
abce1	406324	ENSDARG00000007216	920.426	662.484	569.616	1324.06	914.838	1012.06	0.594842	0.0718668
abcf1	406467	ENSDARG00000031795	712.364	470.661	385.358	860.344	682.921	548.612	0.415537	0.420789
abcf2a	336770	ENSDARG00000038785	409.188	355.962	317.004	651.178	573.377	479.293	0.65491	0.0152938
abcf2b	100000576	ENSDARG00000052331	13.8708	4.94391	5.94382	0	2.96064	1.98055	-2.3251	0.422595
abcf3	100331227	ENSDARG00000089705	38.64	50.4279	39.6255	110.503	61.1866	23.7666	0.602965	0.666836
abcg2a	735312	ENSDARG00000100075	984.826	609.09	950.021	772.534	593.115	611.99	-0.363269	0.397789
abcg2c	569858	ENSDARG00000058574	309.12	346.074	380.405	313.749	336.526	361.45	-0.0336614	0.965775
abcg2d	735310	ENSDARG00000016818	21.7969	51.4167	61.4195	28.6124	31.5802	68.329	-0.0671321	0.976575
abch1	558667	ENSDARG00000111253	14.8616	82.069	42.5974	25.6525	43.4227	23.7666	-0.58772	0.739016
abhd10a	568517	ENSDARG00000076435	75.2985	40.5401	66.3727	86.8237	56.2522	97.047	0.398167	0.715526
abhd10b	492622	ENSDARG00000116787	82.2339	62.2933	48.5412	90.7702	103.622	98.0372	0.598984	0.372224
abhd11	446169	ENSDARG00000069501	80.2524	89.9792	83.2135	97.6767	109.544	66.3484	0.110281	0.930262
abhd12	767657	ENSDARG00000071004	270.48	234.341	249.641	242.712	217.114	203.997	-0.184625	0.749033
abhd13	561333	ENSDARG00000059209	79.2616	70.2036	66.3727	70.0509	65.1341	101.998	0.135994	0.915185
abhd14a	404598	ENSDARG00000058367	72.3262	50.4279	52.5038	70.0509	56.2522	44.5624	-0.0365439	0.983312
abhd14b	393338	ENSDARG00000100531	53.5016	53.3943	30.7097	45.3851	25.6589	20.7958	-0.583274	0.65784
abhd15a	560644	ENSDARG00000116294	26.7508	42.5177	22.7846	58.2113	64.1472	47.5332	0.884041	0.294658
abhd16a	564613	ENSDARG00000078929	284.351	262.027	243.697	324.602	301.985	304.014	0.23618	0.596718
abhd17aa	322121	ENSDARG00000091433	207.071	142.385	118.876	199.3	168.757	126.755	0.0793898	0.949897
abhd17ab	100003419	ENSDARG00000109731	764.875	649.63	704.343	511.076	426.332	386.207	-0.67877	0.00326566
abhd17b	437017	ENSDARG00000035571	104.031	196.768	241.715	97.6767	128.294	119.823	-0.64976	0.307328
abhd17c	393126	ENSDARG00000111161	303.176	299.601	360.592	171.674	291.13	283.219	-0.368886	0.498628
abhd18	503769	ENSDARG00000101961	103.04	82.069	105.008	76.9574	65.1341	135.668	-0.0628634	0.967705
abhd2a	393888	ENSDARG00000025797	107.994	140.407	120.858	209.166	178.625	137.648	0.508912	0.33004
abhd2b	559290	ENSDARG00000115068	0.99077	3.95513	0.990637	17.7594	5.92128	7.9222	2.41207	0.292628
abhd3	447830	ENSDARG00000018809	0	7.91026	6.93446	8.8797	13.8163	16.8347	1.41287	0.600786
abhd4	550276	ENSDARG00000102887	10.8985	20.7644	14.8596	19.7327	26.6458	6.93193	0.196572	0.949391
abhd5a	566493	ENSDARG00000099189	8.91693	16.8093	9.90637	14.7995	18.7507	29.7083	0.827891	0.63617
abhd6a	799085	ENSDARG00000060756	39.6308	28.6747	21.794	34.5322	8.88192	9.90275	-0.756803	0.677864
abhd8a	558563		9.9077	14.8317	2.97191	0	6.90816	1.98055	-1.64038	0.632123
abhd8b	101883400	ENSDARG00000111960	7.92616	49.4391	60.4289	34.5322	67.1079	55.4554	0.415344	0.844759
abi1a	393711	ENSDARG00000010155	879.804	864.196	897.517	678.803	666.144	699.134	-0.369917	0.0659338
abi1b	767738	ENSDARG00000062991	162.486	212.588	293.229	268.364	267.445	306.985	0.334669	0.576959
abi2a	767646	ENSDARG00000111927	287.323	230.386	276.388	268.364	259.55	253.51	-0.0231896	0.977184
abi2b	692331	ENSDARG00000014875	1086.88	1050.09	994.599	836.665	972.077	995.227	-0.15942	0.653387
abi3a	767807	ENSDARG00000060072	2.97231	20.7644	17.8315	102.61	75.0029	36.6402	2.3657	0.0110792
abi3b	566059	ENSDARG00000063283	3.96308	52.4055	43.588	16.7728	26.6458	60.4068	0.0546793	0.989806
abi3bp	101884149	ENSDARG00000062156	0	8.89904	5.94382	8.8797	11.8426	7.9222	0.948381	0.793237
abi3bpb	100149890	ENSDARG00000111438	787.662	1024.38	842.041	294.017	354.29	374.324	-1.37595	5.04158e-11
abl1	100000720	ENSDARG00000035187	1882.46	1988.44	1974.34	2013.72	2093.17	2147.91	0.0976962	0.760415
abl2	570636	ENSDARG00000013841	582.573	660.507	585.466	481.477	553.64	506.031	-0.246697	0.455927
ablim1a	100003558	ENSDARG00000060149	66.3816	41.5289	93.1199	367.027	327.644	204.987	2.16204	2.02154e-07
ablim1b	541550	ENSDARG00000112629	567.711	585.359	554.757	350.255	464.821	487.215	-0.391132	0.221883
ablim2	568454	ENSDARG00000109680	153.569	106.789	103.026	113.463	170.73	126.755	0.177486	0.862521
ablim3	566821	ENSDARG00000112071	209.053	379.693	326.91	70.0509	88.8192	116.852	-1.73166	3.47287e-06
abraa	324520	ENSDARG00000038583	13.8708	28.6747	8.91573	6.90643	6.90816	23.7666	-0.453747	0.879009
abrab	445477	ENSDARG00000033854	17.8339	1.97757	12.8783	0	3.94752	2.97083	-2.24043	0.43045
abracl	336650	ENSDARG00000042876	102.049	97.8895	99.0637	331.509	213.166	142.6	1.20077	0.00751623
abraxas2a	449820	ENSDARG00000115196	123.846	154.25	158.502	174.634	203.297	138.639	0.242684	0.742256
abraxas2b	406584	ENSDARG00000098907	197.163	183.914	125.811	198.313	112.504	131.707	-0.195896	0.847457
abt1	553568	ENSDARG00000043666	83.2247	73.1699	55.4757	125.302	78.9504	137.648	0.690365	0.287939
abtb1	100536189	ENSDARG00000063354	117.902	152.273	175.343	136.155	95.7274	136.658	-0.27368	0.733815
abtb2a	559451	ENSDARG00000059751	187.256	52.4055	62.4101	147.008	155.927	188.152	0.701113	0.455946
abtb2b	100007078	ENSDARG00000111540	488.45	528.999	617.167	420.306	539.823	468.4	-0.194418	0.679143
acaa1	431754	ENSDARG00000004687	52.5108	24.7196	40.6161	97.6767	40.4621	28.718	0.501802	0.750876
acaa2	406325	ENSDARG00000038881	323.982	314.433	280.35	327.562	300.012	228.754	-0.101502	0.894583
acaca	559403	ENSDARG00000114071	297.231	298.612	228.837	385.773	305.933	266.384	0.216343	0.726271
acacb	556236	ENSDARG00000061994	1755.64	1740.26	1709.84	1779.89	1691.51	1917.17	0.0497935	0.908781
acad11	393147	ENSDARG00000045411	156.542	105.8	101.045	111.49	89.8061	108.93	-0.22818	0.80811
acad8	394130	ENSDARG00000116771	100.068	50.4279	119.867	73.9975	84.8717	72.2901	-0.225961	0.863205
acad9	724002	ENSDARG00000055620	400.271	357.939	291.247	464.704	376.001	381.256	0.219563	0.673006
acadl	394156	ENSDARG00000115321	95.1139	88.9904	68.3539	94.7168	103.622	58.4262	0.0244633	0.989733
acadm	406283	ENSDARG00000038900	393.336	290.702	320.966	345.322	306.92	231.724	-0.185099	0.782852
acads	445288	ENSDARG00000030781	69.3539	70.2036	44.5787	65.1178	52.3047	55.4554	-0.0910249	0.955102
acadsb	100037342	ENSDARG00000098174	130.782	187.869	128.783	132.209	118.426	162.405	-0.115451	0.911089
acadvl	573723	ENSDARG00000016687	977.89	732.688	742.978	763.654	810.229	687.251	-0.117814	0.829509
acana	497505	ENSDARG00000035891	22.7877	26.6971	15.8502	380.84	204.284	239.647	3.658	4.00174e-18
acanb	559593	ENSDARG00000113408	0	11.8654	36.6536	6.90643	9.8688	12.8736	-0.710609	0.854201
acap1	561771	ENSDARG00000109603	199.145	245.218	235.772	655.124	443.109	303.024	1.04285	0.00532068
acap2	100124613	ENSDARG00000060783	473.588	295.646	390.311	315.723	300.998	340.655	-0.276395	0.597182
acap3a	322991	ENSDARG00000075990	330.917	372.771	394.273	174.634	281.261	276.287	-0.584578	0.124904
acap3b	100009646	ENSDARG00000099240	221.933	236.319	240.725	160.821	185.533	144.58	-0.509685	0.169989
acat1	445290	ENSDARG00000045888	209.053	189.846	172.371	233.832	166.783	196.074	0.0628142	0.948365
acat2	30643	ENSDARG00000007127	97.0955	49.4391	51.5131	109.516	76.9767	62.3873	0.329672	0.789619
acbd3	406270	ENSDARG00000042623	597.434	502.302	463.618	598.886	455.939	330.752	-0.174131	0.80811
acbd4	406368	ENSDARG00000027070	33.6862	46.4728	28.7285	66.1044	63.1603	31.6888	0.563843	0.634943
acbd5a	553674	ENSDARG00000034883	101.059	84.0465	104.017	92.7435	80.9242	67.3387	-0.262546	0.772284
acbd6	324090	ENSDARG00000039456	140.689	130.519	86.1854	124.316	91.7799	67.3387	-0.334452	0.726239
accs	541510	ENSDARG00000052124	247.693	208.633	272.425	256.525	274.353	299.063	0.187582	0.748891
acd	794664	ENSDARG00000078055	25.76	60.3157	60.4289	64.1311	59.2128	89.1248	0.536235	0.625338
ace	565980	ENSDARG00000079166	302.185	264.005	346.723	132.209	166.783	193.104	-0.891572	0.00518364
acer1	550266	ENSDARG00000010347	11.8892	24.7196	0	1.97327	8.88192	0.990275	-1.62772	0.659856
acer2	100331179	ENSDARG00000077782	176.357	131.508	168.408	104.583	103.622	101.008	-0.623161	0.154341
acer3	555411	ENSDARG00000093366	67.3724	86.0241	82.2229	87.8103	62.1735	82.1928	-0.021261	0.99063
ache	114549	ENSDARG00000031796	214.006	161.172	163.455	150.955	173.691	165.376	-0.136448	0.871133
acin1a	368893	ENSDARG00000111685	3305.21	3874.05	4132.94	3863.65	3877.45	4289.87	0.0888721	0.831081
acin1b	327495	ENSDARG00000026842	2296.61	2416.58	2380.5	2337.33	2577.73	2647.01	0.0922406	0.788965
ackr3a	100000764	ENSDARG00000062478	24.7693	55.3718	49.5318	63.1445	38.4883	68.329	0.390265	0.777806
ackr3b	561050	ENSDARG00000113530	1913.18	1947.9	1687.05	2024.57	2348.77	1956.78	0.190235	0.528901
ackr4a	100003167	ENSDARG00000078729	0	17.7981	13.8689	10.853	20.7245	15.8444	0.582499	0.875114
ackr4b	641390	ENSDARG00000040133	36.6585	75.1475	73.3071	29.599	44.4096	34.6596	-0.76849	0.41118
aclya	436922	ENSDARG00000099079	744.069	689.181	560.701	798.186	671.079	487.215	-0.0273511	0.974703
aclyb	794259	ENSDARG00000055652	36.6585	27.6859	32.691	16.7728	34.5408	35.6499	-0.158147	0.940238
aco1	568448	ENSDARG00000026376	533.034	575.471	544.85	347.295	461.86	323.82	-0.545264	0.0577412
aco2	322670	ENSDARG00000111879	2007.3	1979.54	1603.84	2048.25	2001.39	1611.18	0.017992	0.977329
acot11a	554842	ENSDARG00000058229	37.6493	65.2597	37.6442	57.2247	62.1735	29.7083	0.0852604	0.966061
acot11b	641574	ENSDARG00000042122	126.819	88.9904	120.858	45.3851	75.9898	32.6791	-1.12778	0.0621026
acot13	564010	ENSDARG00000114746	84.2155	38.5625	44.5787	73.9975	39.4752	47.5332	-0.0557554	0.976648
acot14	557184	ENSDARG00000110067	95.1139	127.553	168.408	166.741	133.229	202.016	0.360174	0.635933
acot15	557032	ENSDARG00000111748	87.1878	66.2484	91.1386	94.7168	86.8455	80.2123	0.0980962	0.936619
acot16	402867	ENSDARG00000113784	10.8985	0	0	1.97327	0	0	-2.46501	1
acot17	572757	ENSDARG00000112174	1.98154	14.8317	8.91573	2.9599	2.96064	13.8639	-0.379373	0.931729
acot18	556673	ENSDARG00000112227	26.7508	28.6747	15.8502	18.746	16.777	23.7666	-0.265717	0.902799
acot20	553440	ENSDARG00000042510	52.5108	43.5064	21.794	20.7193	36.5146	26.7374	-0.488511	0.750056
acot7	447878	ENSDARG00000018653	19.8154	23.7308	40.6161	83.8638	45.3965	37.6305	0.987728	0.322175
acot8	450052	ENSDARG00000014138	0.99077	2.96635	5.94382	12.8262	8.88192	5.94165	1.48172	0.584673
acot9.1	798073	ENSDARG00000114328	291.286	205.667	208.034	229.885	217.114	178.25	-0.173129	0.819051
acot9.2	798008	ENSDARG00000113544	43.5939	44.4952	16.8408	34.5322	24.672	7.9222	-0.644356	0.729138
acox1	449662	ENSDARG00000014727	350.733	269.938	301.154	405.506	279.287	189.143	-0.0769234	0.946122
acox3	406421	ENSDARG00000038865	87.1878	42.5177	46.5599	39.4653	32.567	73.2804	-0.278655	0.868507
acoxl	569104	ENSDARG00000020149	122.856	143.373	81.2322	124.316	116.452	101.008	-0.0238029	0.987802
acp1	541489	ENSDARG00000076486	122.856	87.0129	88.1667	136.155	81.9111	102.989	0.107364	0.932331
acp2	503759	ENSDARG00000007244	113.939	124.587	106.989	199.3	139.15	161.415	0.532791	0.272148
acp5a	406801	ENSDARG00000111996	1.98154	5.9327	4.95318	104.583	68.0947	71.2998	4.24475	5.11025e-10
acp5b	436725	ENSDARG00000109721	9.9077	6.92148	2.97191	0	7.89504	1.98055	-1.00354	0.826207
acp6	558758	ENSDARG00000040064	31.7046	44.4952	31.7004	30.5856	32.567	24.7569	-0.295592	0.852564
acrc	541448	ENSDARG00000101060	249.674	285.758	230.818	229.885	250.668	241.627	-0.085472	0.908078
acsbg2	335159	ENSDARG00000004094	1928.04	1544.48	1541.43	1018.21	912.864	859.559	-0.845347	4.23377e-06
acsf2	751707	ENSDARG00000061201	675.705	854.308	719.202	824.825	882.271	711.018	0.104463	0.846956
acsf3	562292	ENSDARG00000114624	48.5477	39.5513	54.485	71.0376	45.3965	55.4554	0.269704	0.835943
acsl1a	555308	ENSDARG00000109220	267.508	353.984	315.023	290.07	318.762	301.044	-0.0416443	0.959008
acsl1b	445175	ENSDARG00000003854	373.52	401.446	278.369	434.118	420.411	391.159	0.241975	0.619631
acsl2	100332846	ENSDARG00000078399	378.474	310.478	367.526	426.225	425.345	737.755	0.589132	0.146676
acsl3a	567157	ENSDARG00000032079	55.4831	67.2372	39.6255	25.6525	14.8032	13.8639	-1.57944	0.0372062
acsl3b	559656	ENSDARG00000014674	1719.98	1364.52	1285.85	1524.35	1547.43	1228.93	-0.0231628	0.973121
acsl4a	393622	ENSDARG00000004078	253.637	274.882	240.725	389.72	388.831	397.1	0.611935	0.0122782
acsl4b	334561	ENSDARG00000010752	92.1416	114.699	69.3446	280.204	284.222	169.337	1.40968	0.000355163
acsl6	566863		27.7416	45.484	59.4382	19.7327	43.4227	57.436	-0.137734	0.950856
acsm3	100002035	ENSDARG00000004880	280.388	270.926	219.921	204.233	215.14	210.929	-0.291136	0.538571
acss1	541435	ENSDARG00000109700	92.1416	116.676	154.539	131.222	184.547	172.308	0.42571	0.51842
acss2	436914	ENSDARG00000112371	871.878	764.329	753.875	1149.43	1029.32	1167.53	0.485497	0.0136129
acss2l	560020	ENSDARG00000069029	0	2.96635	14.8596	1.97327	0.98688	45.5527	1.44432	0.732284
acss3	566019	ENSDARG00000032218	57.4647	98.8783	82.2229	100.637	153.953	111.901	0.61937	0.345988
acta1a	550445	ENSDARG00000036371	540.961	386.614	195.155	119.383	280.274	186.172	-0.938459	0.123318
acta1b	407658	ENSDARG00000055618	3224.96	2015.14	905.442	566.327	1321.43	1022.95	-1.07816	0.330202
actb1	57934	ENSDARG00000113649	35543.9	31835.8	27220.7	53805	36479	30617.3	0.353913	0.35446
actb2	57935	ENSDARG00000037870	42790.4	35369.7	43073.9	72336	52405.3	51500.3	0.53976	0.0158569
actc1a	408256	ENSDARG00000042535	159.514	399.468	173.361	87.8103	225.996	144.58	-0.675973	0.425455
actc1b	58114	ENSDARG00000099197	11463.2	6912.58	3731.73	2001.88	5218.62	4104.69	-0.965	0.369592
actl6a	192313	ENSDARG00000115348	498.357	345.085	306.107	505.156	380.936	367.392	0.124894	0.882689
actn1	560400	ENSDARG00000007219	2825.68	3755.4	2890.68	3680.14	3663.3	3091.64	0.139738	0.744087
actn2b	641575	ENSDARG00000111435	79.2616	61.3045	40.6161	103.596	61.1866	79.222	0.429478	0.679703
actn3a	58037	ENSDARG00000111128	1546.59	1026.36	561.691	300.923	668.118	520.885	-1.07306	0.0261583
actn3b	323320	ENSDARG00000001431	995.724	873.095	367.526	185.487	567.456	467.41	-0.873846	0.495138
actn4	322221	ENSDARG00000099786	9750.17	10385.2	10234.3	12192.8	10696.8	10079	0.118466	0.708425
actr1	406681	ENSDARG00000011611	1020.49	681.271	617.167	948.154	687.856	572.379	-0.0704504	0.941838
actr10	393139	ENSDARG00000038432	170.412	163.149	148.596	165.754	172.704	193.104	0.140712	0.852564
actr2a	406820	ENSDARG00000052438	1220.63	958.13	859.873	2169.61	1341.17	1085.34	0.597003	0.130495
actr2b	554861	ENSDARG00000070076	271.471	364.861	297.191	847.518	555.614	453.546	0.991972	0.00280138
actr3	406250	ENSDARG00000091138	619.231	595.247	531.972	1176.07	879.31	620.903	0.615817	0.0756271
actr3b	100038776	ENSDARG00000008790	0	2.96635	2.97191	0.986633	0	9.90275	0.874485	1
actr5	406809	ENSDARG00000098235	128.8	82.069	102.036	93.7301	109.544	104.969	-0.0216341	0.989485
actr6	324822	ENSDARG00000021370	122.856	78.1138	56.4663	113.463	103.622	99.0275	0.29625	0.777727
actr8	326866	ENSDARG00000103610	117.902	73.1699	101.045	76.9574	143.098	119.823	0.218487	0.849215
acvr1ba	30183	ENSDARG00000018968	812.432	951.209	796.472	1087.27	1056.95	1136.84	0.357941	0.110929
acvr1bb	559222	ENSDARG00000052142	376.493	445.941	440.833	314.736	439.162	540.69	0.0353042	0.970329
acvr1l	30615	ENSDARG00000014986	966.001	969.007	1033.23	887.97	995.762	968.489	-0.0575247	0.905446
acvr2aa	553359	ENSDARG00000011188	1975.6	1709.61	1785.13	1065.56	1376.7	1541.86	-0.457375	0.0686483
acvr2ab	100331014	ENSDARG00000104700	939.25	1055.03	1139.23	803.119	1042.15	1315.09	0.012289	0.99063
acvr2b	30457	ENSDARG00000044422	2381.81	2415.6	2798.55	2108.43	2512.6	2994.59	0.00372512	0.996184
acvrl1	266753	ENSDARG00000018179	943.213	806.847	758.828	751.814	815.163	843.714	-0.0576041	0.918533
acy1	393970	ENSDARG00000038475	47.557	65.2597	33.6817	78.9306	75.9898	26.7374	0.310388	0.853034
acy3.1	791456	ENSDARG00000093003	2.97231	2.96635	0.990637	39.4653	4.9344	11.8833	3.02188	0.0902567
acy3.2	436619	ENSDARG00000005525	104.031	61.3045	36.6536	124.316	73.0291	34.6596	0.199942	0.918533
acyp1	571263	ENSDARG00000060126	19.8154	18.7869	9.90637	9.86633	15.7901	6.93193	-0.573791	0.807214
ada	436919	ENSDARG00000003113	0	19.7757	33.6817	69.0643	44.4096	27.7277	1.40131	0.479148
adal	619263	ENSDARG00000111306	14.8616	2.96635	9.90637	20.7193	6.90816	22.7763	0.861916	0.722118
adam10a	566044	ENSDARG00000053468	3408.25	3424.15	3153.2	2847.42	2708	2336.06	-0.339548	0.0832253
adam10b	393392	ENSDARG00000015502	955.103	865.185	1140.22	837.651	938.523	1185.36	0.000489579	0.999905
adam11	567145	ENSDARG00000079204	49.5385	7.91026	23.7753	18.746	12.8294	18.8152	-0.688712	0.738744
adam12	563275	ENSDARG00000079068	1324.66	1361.55	1398.78	589.02	783.583	777.366	-0.926029	8.33003e-07
adam15	795199	ENSDARG00000089213	681.65	685.226	671.652	226.926	289.156	175.279	-1.55997	1.48571e-10
adam17a	324142	ENSDARG00000043213	1248.37	1325.96	1278.91	1052.74	1015.5	1067.52	-0.297265	0.135236
adam17b	560657	ENSDARG00000093093	796.579	617.989	557.729	413.399	564.495	482.264	-0.433748	0.216848
adam19a	565342		753.976	757.407	685.521	641.311	818.124	602.087	-0.0917512	0.877829
adam19b	571252	ENSDARG00000067545	157.532	184.902	171.38	586.06	489.493	418.886	1.54029	1.9212e-10
adam22	100126805	ENSDARG00000060532	72.3262	147.329	282.332	24.6658	132.242	137.648	-0.769132	0.558928
adam23a	794175	ENSDARG00000062323	22.7877	46.4728	83.2135	31.5723	60.1997	50.504	-0.09988	0.965073
adam28	767749	ENSDARG00000109685	13.8708	16.8093	30.7097	20.7193	29.6064	21.7861	0.232278	0.918421
adam8a	368917	ENSDARG00000001452	1015.54	1006.58	670.661	1899.27	1639.21	1213.09	0.81931	0.00401146
adam8b	100005593	ENSDARG00000057644	323.982	256.095	208.034	228.899	184.547	173.298	-0.425643	0.395283
adam9	447940	ENSDARG00000010070	290.296	211.599	296.2	139.115	197.376	196.074	-0.583609	0.166052
adamts1	565145	ENSDARG00000103519	1636.75	3218.49	2889.69	1100.1	2276.73	2033.03	-0.517663	0.321904
adamts10	564734	ENSDARG00000075188	1605.05	1785.74	2006.04	1201.72	1394.46	1731	-0.318695	0.321322
adamts12	100003937	ENSDARG00000067549	697.502	887.927	812.322	573.234	775.688	582.282	-0.312179	0.395724
adamts15a	569571	ENSDARG00000111736	119.883	276.859	310.069	90.7702	114.478	147.551	-1.00252	0.0747227
adamts17	101884120	ENSDARG00000075555	284.351	342.119	345.732	173.647	199.35	143.59	-0.91221	0.00172315
adamts18	100150128	ENSDARG00000001999	160.505	348.051	231.809	221.006	294.09	227.763	0.00483643	0.99907
adamts2	571682	ENSDARG00000075930	89.1693	185.891	104.017	44.3985	45.3965	42.5818	-1.51786	0.00314479
adamts3	102467218	ENSDARG00000060127	754.967	1403.08	1347.27	801.146	1192.15	1136.84	-0.163327	0.833129
adamts5	565053	ENSDARG00000100307	296.24	166.115	268.463	384.787	402.647	383.236	0.679778	0.0639929
adamts6	569099	ENSDARG00000041982	1935.97	2463.06	1753.43	1498.7	1990.54	1565.63	-0.283491	0.434714
adamts7	560364	ENSDARG00000102478	2848.46	2696.41	2338.89	2023.58	2257	2014.22	-0.324723	0.126683
adamts8a	569618	ENSDARG00000115086	20.8062	59.327	41.6068	48.345	32.567	31.6888	-0.112598	0.958929
adamts9	100333407	ENSDARG00000077778	612.296	724.778	680.568	581.127	575.351	507.021	-0.278441	0.363429
adamtsl2	100537087	ENSDARG00000074033	4.95385	22.742	39.6255	20.7193	22.6982	7.9222	-0.390893	0.894708
adamtsl3	100534944	ENSDARG00000027903	283.36	339.152	244.687	195.353	297.051	382.246	0.0123007	0.99276
adamtsl4	100333903	ENSDARG00000063407	1061.11	959.119	1005.5	1215.53	1219.78	1015.03	0.189472	0.564525
adamtsl5	101886605	ENSDARG00000052118	73.317	64.2709	68.3539	86.8237	112.504	152.502	0.772601	0.168384
adamtsl7	556634	ENSDARG00000055439	61.4278	75.1475	57.4569	51.3049	92.7667	99.0275	0.325186	0.769082
adap2	100331455	ENSDARG00000070565	31.7046	44.4952	56.4663	83.8638	77.9635	77.2415	0.849628	0.192328
adar	58119	ENSDARG00000012389	1048.23	762.351	905.442	1162.25	1138.86	1179.42	0.357816	0.177045
adarb1a	58134	ENSDARG00000041609	27.7416	56.3606	93.1199	51.3049	50.3309	74.2706	-0.010789	0.996267
adarb1b	558759	ENSDARG00000003544	351.723	242.252	307.097	281.19	303.959	336.694	0.0328798	0.970329
adarb2	558149	ENSDARG00000071823	98.0863	105.8	64.3914	60.1846	137.176	124.775	0.263904	0.833626
adat1	792614	ENSDARG00000061348	25.76	43.5064	53.4944	55.2514	75.0029	56.4457	0.604875	0.539399
adat2	100034610	ENSDARG00000041944	7.92616	28.6747	8.91573	25.6525	36.5146	46.5429	1.25583	0.331667
adat3	368634	ENSDARG00000005640	56.4739	46.4728	54.485	44.3985	53.2915	44.5624	-0.146239	0.918775
adck1	100144553	ENSDARG00000062561	80.2524	73.1699	37.6442	66.1044	72.0423	47.5332	-0.0412255	0.981534
adck2	572087	ENSDARG00000112576	154.56	174.026	186.24	148.982	188.494	199.045	0.0595237	0.953621
adck3	437001	ENSDARG00000020123	308.13	365.85	375.451	450.891	426.332	507.021	0.399473	0.195587
adck4	799071	ENSDARG00000113287	175.366	118.654	142.652	130.236	124.347	142.6	-0.136744	0.887775
adck5	100001584	ENSDARG00000075405	143.662	161.172	157.511	128.262	132.242	183.201	-0.0594228	0.956683
adcy1a	557026	ENSDARG00000069026	0	0.988783	10.897	5.9198	5.92128	5.94165	0.581325	0.91557
adcy2a	563724	ENSDARG00000058392	19.8154	6.92148	4.95318	0.986633	2.96064	26.7374	-0.0467157	0.993657
adcy2b	557902	ENSDARG00000014588	1384.11	1234.99	1220.46	637.365	792.465	650.611	-0.884043	1.11184e-06
adcy3a	571825	ENSDARG00000077145	214.006	192.813	282.332	180.554	259.55	265.394	0.0338134	0.974516
adcy5	562619	ENSDARG00000091342	387.391	273.893	319.976	234.819	279.287	305.005	-0.260584	0.62869
adcy6a	570652	ENSDARG00000114782	755.958	642.709	720.193	315.723	411.529	491.176	-0.798291	0.00217476
adcy6b	560807	ENSDARG00000111136	270.48	201.712	217.94	203.246	232.904	221.822	-0.0688361	0.936097
adcy7	568726	ENSDARG00000060070	1135.42	1080.74	1058.99	700.509	575.351	500.089	-0.88295	1.25292e-05
adcy8	100148976	ENSDARG00000031783	10.8985	6.92148	11.8876	27.6257	48.3571	53.4749	2.12362	0.0108816
adcy9	100333702	ENSDARG00000100869	1811.13	1846.06	1798.01	1151.4	1310.58	1396.29	-0.499687	0.00380086
adcyap1b	335625	ENSDARG00000027740	11.8892	14.8317	34.6723	11.8396	2.96064	10.893	-1.25675	0.498628
adcyap1r1b	555473	ENSDARG00000113350	1.98154	38.5625	23.7753	20.7193	18.7507	19.8055	-0.117877	0.973686
add1	555511	ENSDARG00000103962	2065.76	1669.06	1784.14	1786.79	1545.45	1503.24	-0.190728	0.566599
add2	570147	ENSDARG00000074581	6.93539	13.843	43.588	0	8.88192	17.825	-1.26927	0.660436
add3a	556762	ENSDARG00000040874	2722.64	2597.53	2808.46	1286.57	1371.76	1776.55	-0.874126	1.85873e-06
add3b	553243	ENSDARG00000114699	4.95385	10.8766	5.94382	2.9599	13.8163	3.9611	-0.0703648	0.990244
adgb	555435	ENSDARG00000005595	0	1.97757	6.93446	1.97327	9.8688	10.893	1.35107	0.737779
adgra1	101884141		14.8616	16.8093	26.7472	20.7193	12.8294	20.7958	-0.1043	0.968964
adgra2	560700	ENSDARG00000076994	4141.42	3671.35	4197.33	2639.24	2868.86	3316.43	-0.44466	0.0181504
adgra3	100003592		387.391	554.707	587.448	345.322	491.466	520.885	-0.171986	0.807086
adgrb1a	563527	ENSDARG00000075133	84.2155	76.1363	133.736	215.086	176.652	149.532	0.880147	0.0646119
adgrb1b	100302472	ENSDARG00000078529	0	0.988783	20.8034	5.9198	1.97376	16.8347	0.182289	0.976102
adgrb2	556993		87.1878	51.4167	93.1199	62.1579	41.449	39.611	-0.69412	0.406711
adgrb3	566117	ENSDARG00000059832	127.809	89.9792	105.998	34.5322	54.2784	80.2123	-0.937917	0.146676
adgrd1	791731		34.677	39.5513	79.251	32.5589	45.3965	56.4457	-0.191533	0.915185
adgrd2	571770	ENSDARG00000103067	7.92616	24.7196	33.6817	26.6391	37.5014	30.6985	0.51586	0.782982
adgre5b.2	101882660	ENSDARG00000104083	25.76	34.6074	43.588	12.8262	16.777	32.6791	-0.73924	0.600402
adgre5b.3	792970	ENSDARG00000089904	55.4831	62.2933	65.382	27.6257	51.3178	41.5916	-0.603659	0.511699
adgrf6	565101	ENSDARG00000042829	341.816	546.797	252.612	103.596	265.471	165.376	-1.09448	0.0390429
adgrf7	613165		15.8523	22.742	21.794	13.8129	8.88192	23.7666	-0.378408	0.873498
adgrf8	100537224	ENSDARG00000093316	4.95385	12.8542	9.90637	0	14.8032	18.8152	0.278481	0.955554
adgrg1	324948	ENSDARG00000027222	39.6308	56.3606	104.017	125.302	127.308	154.483	1.0253	0.0923441
adgrg11	563883	ENSDARG00000041413	0	1.97757	1.98127	0	0	8.91248	1.17043	1
adgrg2a	101882832	ENSDARG00000088137	67.3724	87.0129	34.6723	6.90643	51.3178	30.6985	-1.08823	0.414232
adgrg3	799479	ENSDARG00000074782	1.98154	0.988783	0	77.944	17.7638	20.7958	5.29369	0.000121774
adgrg6	561970	ENSDARG00000054137	356.677	259.061	302.144	357.161	472.716	398.091	0.419907	0.268179
adgrl1a	562531	ENSDARG00000089292	278.406	220.499	208.034	76.9574	115.465	193.104	-0.874827	0.101113
adgrl2a	57987	ENSDARG00000069356	2341.19	2625.22	2951.11	2330.43	2709.97	3486.76	0.107012	0.850607
adgrl3.1	560631	ENSDARG00000061121	1518.85	1679.94	1809.89	1904.2	2079.36	1973.62	0.250196	0.287641
adgrl4	406676	ENSDARG00000013653	978.881	745.542	969.834	342.362	411.529	483.254	-1.12289	1.20576e-06
adgrv1	415105	ENSDARG00000021137	460.708	641.72	1078.8	888.956	1227.68	1288.35	0.642503	0.157965
adh5	116517	ENSDARG00000111574	477.551	286.747	417.058	671.897	415.477	413.935	0.345801	0.566994
adh8b	402841	ENSDARG00000116820	418.105	488.459	378.423	341.375	287.182	248.559	-0.550896	0.0838397
adhfe1	404618	ENSDARG00000053518	144.652	132.497	187.23	142.075	139.15	185.181	0.0062616	0.996184
adi1	324079	ENSDARG00000020448	126.819	76.1363	93.1199	125.302	93.7536	91.1053	0.0671091	0.960976
adipoqa	562602	ENSDARG00000062228	8.91693	6.92148	7.9251	12.8262	2.96064	10.893	0.166978	0.966886
adipor1a	436740	ENSDARG00000113136	431.976	308.5	381.395	344.335	403.634	308.966	-0.0859912	0.910445
adipor1b	406821	ENSDARG00000042717	46.5662	69.2148	28.7285	81.8905	46.3834	59.4165	0.377155	0.780417
adipor2	560140	ENSDARG00000101849	377.483	410.345	440.833	325.589	354.29	278.267	-0.358746	0.301663
adka	368220	ENSDARG00000039429	450.8	432.098	530.981	636.378	611.866	608.029	0.392759	0.132644
adkb	322229	ENSDARG00000095947	59.4462	38.5625	48.5412	104.583	70.0685	38.6207	0.541399	0.635305
adm2a	403114	ENSDARG00000111740	17.8339	7.91026	2.97191	12.8262	28.6195	8.91248	0.810475	0.751863
adm2b	100322075	ENSDARG00000078875	10.8985	0	0	0	0	0.990275	-3.35943	1
adma	556502	ENSDARG00000015263	650.936	526.032	589.429	1053.72	860.56	849.656	0.645931	0.003232
admb	570100	ENSDARG00000069027	40.6216	63.2821	53.4944	15.7861	36.5146	9.90275	-1.33922	0.172197
adnp2a	100007394	ENSDARG00000060937	372.53	436.053	357.62	443.985	470.742	404.032	0.177363	0.711425
adnp2b	564171	ENSDARG00000028431	1156.23	1155.89	1198.67	1245.13	1249.39	1344.79	0.12905	0.68708
adnpa	564637	ENSDARG00000115617	1770.51	1344.74	1419.58	1585.52	1565.19	1561.66	0.0554096	0.918421
adnpb	100330315	ENSDARG00000115866	358.659	436.053	413.096	472.597	440.149	486.225	0.21196	0.603135
adoa	494091	ENSDARG00000042827	172.394	174.026	162.464	228.899	136.189	158.444	0.0409579	0.97044
adob	406474	ENSDARG00000053571	79.2616	72.1811	88.1667	126.289	93.7536	55.4554	0.201435	0.879075
adora1b	100150997	ENSDARG00000075694	0	13.843	3.96255	5.9198	0.98688	2.97083	-0.850173	0.877361
adora2aa	561701	ENSDARG00000114856	43.5939	64.2709	81.2322	64.1311	94.7405	55.4554	0.180722	0.902929
adora2ab	566118	ENSDARG00000058488	49.5385	26.6971	16.8408	34.5322	42.4359	39.611	0.324838	0.856012
adora2b	560100	ENSDARG00000002533	444.856	439.019	379.414	339.402	287.182	255.491	-0.518188	0.0857768
adpgk	557919	ENSDARG00000115539	236.794	364.861	258.556	296.977	310.867	261.433	0.0151167	0.990244
adpgk2	566398	ENSDARG00000062785	577.619	759.385	618.157	520.942	638.512	616.941	-0.13835	0.794278
adprh	445059	ENSDARG00000040712	22.7877	20.7644	8.91573	6.90643	7.89504	0.990275	-1.73194	0.353311
adprhl1	450012	ENSDARG00000041589	20.8062	19.7757	5.94382	0	19.7376	4.95138	-0.91411	0.797405
adprhl2	796446	ENSDARG00000110712	82.2339	66.2484	67.3633	107.543	53.2915	53.4749	-0.0102446	0.996158
adprm	393393	ENSDARG00000026090	6.93539	11.8654	9.90637	13.8129	7.89504	23.7666	0.663479	0.780323
adra1aa	798498	ENSDARG00000028725	233.822	215.555	220.912	217.059	273.366	339.664	0.308454	0.566156
adra1ba	100149100	ENSDARG00000011317	657.871	531.965	535.935	443.985	422.385	339.664	-0.516942	0.0699598
adra1bb	492486	ENSDARG00000116032	18.8246	4.94391	4.95318	1.97327	0	0	-3.86246	0.175339
adra1d	568614	ENSDARG00000024101	837.201	771.25	766.753	247.645	176.652	269.355	-1.7758	3.2378e-15
adra2a	266750	ENSDARG00000111717	0	19.7757	11.8876	0.986633	19.7376	21.7861	0.424888	0.931475
adra2b	266751	ENSDARG00000102096	57.4647	88.0016	67.3633	98.6633	106.583	105.959	0.548127	0.391981
adra2da	266754	ENSDARG00000091277	38.64	37.5737	35.6629	39.4653	29.6064	26.7374	-0.223621	0.894038
adrb1	557194	ENSDARG00000115574	24.7693	7.91026	4.95318	10.853	3.94752	24.7569	0.0718529	0.988342
adrb2a	565838	ENSDARG00000088124	73.317	48.4503	30.7097	43.4118	29.6064	44.5624	-0.374962	0.796906
adrb3a	558248	ENSDARG00000053646	141.68	93.9343	66.3727	649.204	704.632	329.762	2.47901	6.18438e-10
adrbk2	569403	ENSDARG00000104094	1757.63	1744.21	1729.65	1858.82	1974.75	1929.06	0.139502	0.603161
adrm1	796450	ENSDARG00000113912	817.386	689.181	581.504	859.357	709.567	507.021	-0.00838395	0.993917
adsl	334431	ENSDARG00000111547	172.394	138.43	123.83	174.634	130.268	131.707	0.00650373	0.996184
adss	550502	ENSDARG00000002071	103.04	49.4391	31.7004	12.8262	47.3703	45.5527	-0.800507	0.574458
adssl	192305	ENSDARG00000012399	314.074	197.757	219.921	564.354	311.854	362.441	0.759363	0.0760857
adssl1	407989	ENSDARG00000099517	107.994	76.1363	26.7472	16.7728	47.3703	39.611	-1.02327	0.377568
aebp1	793308	ENSDARG00000091726	1199.82	1459.44	1309.62	1352.67	1353.01	1188.33	-0.0274733	0.963158
aebp2	406815	ENSDARG00000006038	423.059	390.569	398.236	369.987	399.686	339.664	-0.127509	0.807662
aep1	503710	ENSDARG00000039099	1153.26	2024.04	819.257	226.926	770.753	507.021	-1.40928	0.135275
aes	393395	ENSDARG00000115836	268.499	198.745	223.884	248.631	257.576	185.181	0.000589343	0.999905
afap1	568356	ENSDARG00000113963	1032.38	1160.83	1111.49	1280.65	1212.88	1280.43	0.191548	0.485184
afap1l1a	566757	ENSDARG00000116849	414.142	457.806	419.039	160.821	236.851	224.792	-1.05244	6.55575e-05
afap1l1b	768144	ENSDARG00000056453	1764.56	1526.68	1654.36	932.368	834.901	836.783	-0.925381	2.84649e-09
afap1l2	567369	ENSDARG00000074806	851.072	847.387	757.837	520.942	444.096	370.363	-0.879186	5.66899e-05
aff1	100537394		14.8616	19.7757	19.8127	16.7728	26.6458	17.825	0.169641	0.945786
aff2	100330019	ENSDARG00000052242	374.511	528.999	540.888	327.562	386.857	433.741	-0.331168	0.460324
aff3	570215	ENSDARG00000079575	165.459	161.172	228.837	439.052	308.894	312.927	0.933502	0.00483698
aff4	556421	ENSDARG00000001857	2203.47	2468.99	2494.42	2256.43	2345.81	2387.55	-0.036099	0.937287
afg1la	561238	ENSDARG00000011466	34.677	54.383	47.5506	47.3584	56.2522	60.4068	0.263721	0.84239
afg1lb	555926	ENSDARG00000042902	11.8892	49.4391	71.3259	79.9173	63.1603	82.1928	0.763966	0.546318
afg3l2	569168	ENSDARG00000062272	277.416	336.186	255.584	322.629	321.723	348.577	0.192	0.719795
afmid	550372	ENSDARG00000099106	0	37.5737	16.8408	49.3316	24.672	59.4165	1.29381	0.543166
afp4	568707	ENSDARG00000095863	0	1.97757	0	5.9198	10.8557	0	3.08401	1
aftpha	556043	ENSDARG00000069249	464.671	314.433	316.013	297.963	270.405	327.781	-0.289278	0.58443
aftphb	100004990	ENSDARG00000071347	73.317	22.742	57.4569	41.4386	36.5146	42.5818	-0.348896	0.829709
aga	566517	ENSDARG00000114305	31.7046	75.1475	83.2135	80.9039	47.3703	35.6499	-0.213427	0.906705
agap1	100148154	ENSDARG00000113863	2273.82	2799.24	2659.86	1877.56	2434.63	2553.92	-0.171526	0.675054
agap2	565109	ENSDARG00000099874	14.8616	27.6859	45.5693	436.092	252.641	199.045	3.33273	4.17673e-11
agap3	324332	ENSDARG00000087822	1041.3	1637.42	1338.35	947.168	1308.6	1337.86	-0.160712	0.789761
agbl1	100536841	ENSDARG00000104384	15.8523	19.7757	22.7846	14.7995	29.6064	5.94165	-0.214219	0.942636
agbl2	568152	ENSDARG00000079983	0	6.92148	21.794	9.86633	5.92128	8.91248	-0.217305	0.966345
agbl4	550450	ENSDARG00000068050	23.7785	48.4503	33.6817	32.5589	36.5146	31.6888	-0.0719278	0.97143
agbl5	445479	ENSDARG00000045900	156.542	120.631	186.24	149.968	115.465	111.901	-0.29641	0.696045
agfg1a	327597	ENSDARG00000030020	610.315	474.616	455.693	427.212	362.185	362.441	-0.419561	0.202474
agfg1b	393560	ENSDARG00000019526	266.517	179.958	152.558	140.102	145.071	91.1053	-0.670781	0.219886
aggf1	559905	ENSDARG00000060109	242.739	264.994	222.893	282.177	210.205	290.151	0.0989937	0.902268
agk	334270	ENSDARG00000113514	218.96	170.071	199.118	205.22	147.045	204.987	-0.0778559	0.935436
agla	567798	ENSDARG00000103811	515.201	501.313	505.225	447.931	527.981	592.185	0.0432761	0.951124
aglb	553352	ENSDARG00000100352	6.93539	3.95513	4.95318	0	6.90816	9.90275	0.0853527	0.99063
agmat	556522	ENSDARG00000059700	1.98154	1.97757	1.98127	6.90643	8.88192	10.893	2.16715	0.333929
agmo	405819	ENSDARG00000025595	42.6031	19.7757	53.4944	48.345	10.8557	59.4165	0.0337422	0.992186
ago1	570775	ENSDARG00000092644	829.275	843.432	1110.5	692.616	850.691	1023.94	-0.116536	0.856559
ago2	570630	ENSDARG00000061268	2676.07	2249.48	2509.28	2169.61	2610.3	2751.97	0.0187072	0.974641
ago3b	568159	ENSDARG00000063079	320.019	344.096	262.519	270.337	208.232	169.337	-0.516184	0.228261
ago4	100535764	ENSDARG00000100854	1176.04	1171.71	1171.92	1292.49	1314.52	1228.93	0.124144	0.698927
agpat2	777624	ENSDARG00000101139	161.496	202.7	250.631	264.418	233.891	246.579	0.276842	0.638481
agpat3	406734	ENSDARG00000036549	2010.27	1670.05	1617.71	1388.19	1341.17	1186.35	-0.436174	0.0404976
agpat4	406265	ENSDARG00000069044	635.084	524.055	523.056	435.105	406.595	411.954	-0.424197	0.111031
agpat5	767778	ENSDARG00000063187	559.785	477.582	411.114	685.71	653.315	595.155	0.417191	0.152914
agpat9l	567414	ENSDARG00000112415	58.4554	35.5962	25.7566	44.3985	26.6458	19.8055	-0.399074	0.816268
agps	386801	ENSDARG00000042821	158.523	180.947	160.483	237.779	223.035	223.802	0.453492	0.226869
agr1	335309	ENSDARG00000060682	237.785	454.84	256.575	40.4519	208.232	207.958	-1.05568	0.192313
agr2	335616	ENSDARG00000070480	2.97231	26.6971	17.8315	6.90643	20.7245	13.8639	-0.195097	0.958498
agrn	565373	ENSDARG00000110127	5543.36	7124.18	7530.82	4069.86	5527.52	5330.65	-0.436216	0.0928425
agt	322485	ENSDARG00000016412	0	1.97757	2.97191	3.94653	7.89504	9.90275	2.13514	0.499415
agtpbp1	554164	ENSDARG00000105214	160.505	184.902	167.418	270.337	223.035	206.968	0.449601	0.278352
agtr1a	794575	ENSDARG00000018616	26.7508	14.8317	32.691	6.90643	0	4.95138	-2.64708	0.0826303
agtr1b	100333455	ENSDARG00000045443	102.049	106.789	68.3539	147.008	140.137	80.2123	0.406336	0.644421
agtr2	503772	ENSDARG00000035552	511.237	360.906	331.863	237.779	286.195	246.579	-0.643866	0.0601059
agtrap	793937	ENSDARG00000114680	79.2616	27.6859	39.6255	41.4386	17.7638	21.7861	-0.855745	0.503956
agxt2	619269	ENSDARG00000100709	32.6954	48.4503	21.794	22.6926	53.2915	37.6305	0.142298	0.949663
ahctf1	553494	ENSDARG00000077530	2277.78	1715.54	1802.96	2452.77	2112.91	2181.58	0.219179	0.509387
ahcy	387530	ENSDARG00000005191	1256.3	813.768	943.086	1608.21	1088.53	983.343	0.288478	0.585439
ahcyl1	798918	ENSDARG00000056331	52.5108	82.069	60.4289	137.142	122.373	97.047	0.870606	0.0964264
ahcyl2	394240	ENSDARG00000039343	494.394	380.681	430.927	469.637	429.293	407.003	-5.5346e-05	0.999905
ahdc1	100536210	ENSDARG00000093453	346.77	427.154	512.159	287.11	318.762	459.488	-0.271674	0.656204
ahi1	562701	ENSDARG00000044056	446.837	432.098	564.663	414.386	504.296	628.825	0.10026	0.894499
ahnak	559276	ENSDARG00000061764	56835.5	66075.4	57829.4	33211.1	45584	42658.1	-0.573519	0.00276423
ahr1a	246224	ENSDARG00000020046	0	5.9327	1.98127	0	2.96064	8.91248	0.58488	0.938359
ahr1b	554265	ENSDARG00000023537	93.1324	41.5289	83.2135	72.0242	96.7143	72.2901	0.145764	0.92212
ahr2	30517	ENSDARG00000021833	4179.07	3820.66	3816.92	4495.1	3806.4	3428.33	-0.0106345	0.987209
ahrra	641291	ENSDARG00000099702	43.5939	30.6523	10.897	15.7861	31.5802	20.7958	-0.320911	0.893434
ahsa1a	565968	ENSDARG00000028664	118.892	44.4952	59.4382	39.4653	66.121	39.611	-0.61784	0.585439
ahsa1b	321945	ENSDARG00000100317	242.739	168.093	170.39	305.856	211.192	220.831	0.344326	0.572378
aida	393763	ENSDARG00000014532	135.736	124.587	129.773	84.8504	70.0685	105.959	-0.580505	0.281556
aif1l	321033	ENSDARG00000009336	111.957	119.643	133.736	109.516	61.1866	82.1928	-0.530668	0.422041
aifm1	373125	ENSDARG00000117164	682.641	660.507	578.532	994.526	807.268	683.29	0.37094	0.258298
aifm2	557507	ENSDARG00000077549	218.96	251.151	128.783	186.474	172.704	103.979	-0.370771	0.659981
aifm4	791218	ENSDARG00000061634	56.4739	42.5177	30.7097	27.6257	50.3309	25.7472	-0.322664	0.845458
aifm5	557064	ENSDARG00000075551	9.9077	9.88783	7.9251	0	10.8557	0	-1.35229	0.759895
aig1	562261	ENSDARG00000007171	0	13.843	16.8408	3.94653	3.94752	26.7374	0.17443	0.973915
aim1a	556848	ENSDARG00000031782	4258.33	4503.9	3962.55	2298.85	2913.27	2685.63	-0.688129	2.60889e-05
aim1b	566781	ENSDARG00000006060	272.462	658.529	389.32	214.099	324.684	331.742	-0.600946	0.3027
aimp1	562232	ENSDARG00000060036	153.569	81.0802	86.1854	160.821	98.688	100.018	0.164315	0.901328
aimp2	406647	ENSDARG00000018903	137.717	159.194	128.783	242.712	160.861	141.609	0.356946	0.603161
aip	334795	ENSDARG00000104437	412.16	355.962	419.039	560.408	349.356	350.557	0.0862979	0.920102
aipl1	100537095	ENSDARG00000110493	4.95385	10.8766	5.94382	1.97327	0.98688	3.9611	-1.65395	0.577184
ajap1	101887016	ENSDARG00000038655	14.8616	2.96635	16.8408	2.9599	13.8163	9.90275	-0.37789	0.918533
ajuba	572549	ENSDARG00000077842	980.863	931.433	996.581	745.894	868.455	939.771	-0.187646	0.593166
ak1	445486	ENSDARG00000001950	68.3632	56.3606	34.6723	27.6257	53.2915	26.7374	-0.566153	0.652652
ak2	321793	ENSDARG00000005926	357.668	265.983	244.687	398.6	263.497	274.306	0.108895	0.904966
ak3	406404	ENSDARG00000058226	56.4739	49.4391	60.4289	86.8237	46.3834	111.901	0.559225	0.557908
ak4	406590	ENSDARG00000006546	175.366	114.699	140.67	87.8103	100.662	203.997	-0.134279	0.92212
ak5l	548336	ENSDARG00000017739	27.7416	46.4728	37.6442	13.8129	12.8294	17.825	-1.33097	0.149582
ak7a	402854	ENSDARG00000019001	13.8708	18.7869	10.897	9.86633	6.90816	8.91248	-0.76184	0.721106
ak7b	504040	ENSDARG00000017023	2.97231	0	9.90637	0	1.97376	0	-2.70544	1
akap10	566920	ENSDARG00000059549	345.779	489.447	394.273	299.936	399.686	358.48	-0.216608	0.7001
akap11	558595	ENSDARG00000075435	663.816	792.015	878.695	588.033	567.456	728.843	-0.309095	0.384846
akap12a	101885554	ENSDARG00000091792	126.819	176.992	133.736	121.356	170.73	98.0372	-0.165484	0.877361
akap12b	567365	ENSDARG00000110544	34061.7	33588	32798	22098.6	25968.8	23394.3	-0.491203	0.000369333
akap13	108190639	ENSDARG00000023868	326.954	464.728	455.693	857.384	591.141	551.583	0.681188	0.041375
akap17a	393655	ENSDARG00000104768	162.486	165.127	229.828	208.18	147.045	159.434	-0.115178	0.906269
akap1b	556208	ENSDARG00000006062	520.154	460.773	551.785	956.047	906.943	968.489	0.885477	4.27298e-07
akap6	100002625	ENSDARG00000077295	138.708	152.273	150.577	70.0509	184.547	194.094	0.0230876	0.99063
akap7	101885028		173.385	58.3382	142.652	110.503	99.6749	111.901	-0.21704	0.874277
akap8l	406500	ENSDARG00000099635	1369.24	1371.44	1357.17	1478.96	1490.19	1404.21	0.0938764	0.7862
akap9	565037	ENSDARG00000079610	1096.78	1735.31	1171.92	967.887	1080.63	904.121	-0.439445	0.183812
akip1	562301	ENSDARG00000115020	7.92616	19.7757	26.7472	25.6525	30.5933	13.8639	0.364768	0.881679
akirin1	406432	ENSDARG00000116670	259.582	271.915	211.996	305.856	319.749	285.199	0.292822	0.507661
akirin2	406855	ENSDARG00000058729	479.533	358.928	403.189	469.637	426.332	538.71	0.208465	0.672129
akna	556113	ENSDARG00000087110	450.8	353.984	438.852	188.447	237.838	399.081	-0.591499	0.229281
akr1a1b	799805	ENSDARG00000112549	255.619	139.418	187.23	150.955	73.0291	89.1248	-0.894975	0.113802
akr1b1	415138	ENSDARG00000006215	1.98154	5.9327	14.8596	4.93316	25.6589	9.90275	0.830418	0.787574
akr7a3	436642	ENSDARG00000016649	33.6862	25.7083	16.8408	32.5589	27.6326	19.8055	0.0695551	0.975679
akt1	101910198		247.693	305.534	230.818	359.134	281.261	263.413	0.205086	0.741628
akt1s1	566559	ENSDARG00000074667	1004.64	584.371	931.199	778.453	651.341	1172.49	0.0462259	0.965775
akt2	378972	ENSDARG00000011219	1234.5	1018.45	1035.22	1361.55	1163.53	1196.25	0.178547	0.618558
akt2l	403146	ENSDARG00000103612	200.136	95.9119	113.923	93.7301	86.8455	62.3873	-0.754718	0.253524
akt3a	560549	ENSDARG00000104810	105.022	152.273	145.624	107.543	89.8061	123.784	-0.327361	0.663887
akt3b	100149794	ENSDARG00000087205	165.459	202.7	224.875	171.674	187.507	170.327	-0.163456	0.8231
aktip	378716	ENSDARG00000115058	186.265	177.981	161.474	145.035	136.189	187.162	-0.166638	0.834395
alad	550338	ENSDARG00000100372	43.5939	43.5064	21.794	77.944	39.4752	35.6499	0.491286	0.729172
alas1	64608	ENSDARG00000021059	314.074	436.053	287.285	433.132	476.663	412.945	0.350528	0.416279
alas2	64607	ENSDARG00000113125	0	3.95513	2.97191	0	11.8426	31.6888	2.65151	0.416279
alcama	30194	ENSDARG00000116648	2714.71	2879.33	2558.82	1626.96	2091.2	1808.24	-0.560967	0.00192768
alcamb	323919	ENSDARG00000058538	345.779	428.143	488.384	619.605	721.409	701.115	0.694008	0.00477851
aldh16a1	492710	ENSDARG00000037935	194.191	163.149	131.755	176.607	114.478	98.0372	-0.329844	0.68562
aldh18a1	557186	ENSDARG00000099579	530.062	537.898	496.309	658.084	632.59	661.504	0.319591	0.200365
aldh1a2	116713	ENSDARG00000113122	218.96	136.452	135.717	277.244	194.415	170.327	0.386479	0.585439
aldh1a3	751785	ENSDARG00000076933	0	2.96635	1.98127	26.6391	22.6982	15.8444	3.71928	0.00897163
aldh1l1	100526683	ENSDARG00000114342	256.61	304.545	465.599	339.402	332.579	331.742	-0.0327235	0.974302
aldh1l2	100333269	ENSDARG00000070230	246.702	264.005	233.79	454.838	381.923	341.645	0.66251	0.0168576
aldh2.1	393462	ENSDARG00000089924	307.139	305.534	396.255	251.591	261.523	302.034	-0.307701	0.493069
aldh2.2	368239	ENSDARG00000028087	520.154	372.771	288.275	439.052	368.106	339.664	-0.0425971	0.966701
aldh3a1	100000026	ENSDARG00000074791	47.557	36.585	34.6723	27.6257	49.344	24.7569	-0.223936	0.90087
aldh3a2a	323653	ENSDARG00000028259	42.6031	46.4728	49.5318	62.1579	49.344	36.6402	0.0960396	0.955834
aldh3a2b	447920	ENSDARG00000029381	161.496	155.239	137.699	114.449	108.557	84.1734	-0.564937	0.241013
aldh3b1	282559	ENSDARG00000013839	49.5385	47.4616	1.98127	29.599	40.4621	16.8347	-0.187846	0.957499
aldh3b2	557008	ENSDARG00000035606	15.8523	23.7308	16.8408	15.7861	14.8032	22.7763	-0.0805192	0.975072
aldh4a1	394133	ENSDARG00000038207	204.099	305.534	266.481	275.271	254.615	338.674	0.162319	0.825355
aldh5a1	565235	ENSDARG00000113300	215.988	127.553	127.792	191.407	146.058	103.979	-0.0944621	0.943641
aldh6a1	436647	ENSDARG00000053485	755.958	582.393	605.279	840.611	723.383	695.173	0.217053	0.595425
aldh7a1	334197	ENSDARG00000018426	254.628	231.375	158.502	294.017	258.563	205.977	0.235085	0.747061
aldh8a1	447801	ENSDARG00000115119	2.97231	40.5401	13.8689	459.771	245.733	116.852	3.84104	0.0100879
aldh9a1a.1	100005587	ENSDARG00000114905	1360.33	936.377	1178.86	1563.81	1047.08	1037.81	0.0701481	0.929039
aldh9a1a.2	100006238	ENSDARG00000117162	36.6585	52.4055	13.8689	43.4118	26.6458	26.7374	-0.0887112	0.971148
aldh9a1b	399481	ENSDARG00000037061	94.1232	84.0465	45.5693	108.53	73.0291	32.6791	-0.0625384	0.974703
aldoaa	336425	ENSDARG00000011665	1313.76	904.736	1427.51	1465.15	1350.05	1408.17	0.212087	0.640104
aldoab	406496	ENSDARG00000034470	282.37	228.409	142.652	82.8772	179.612	83.1831	-0.918595	0.134757
aldob	321664	ENSDARG00000053684	407.207	486.481	459.656	286.124	343.434	414.925	-0.373773	0.32764
aldocb	369193	ENSDARG00000019702	69.3539	65.2597	120.858	210.153	148.032	239.647	1.22658	0.00739384
alg1	334161	ENSDARG00000054963	256.61	219.51	144.633	199.3	170.73	190.133	-0.148176	0.874474
alg10	100331575	ENSDARG00000053917	52.5108	40.5401	63.4008	70.0509	79.9373	44.5624	0.314518	0.801379
alg11	407614	ENSDARG00000110001	81.2432	131.508	142.652	161.808	113.491	115.862	0.138316	0.906705
alg12	569494	ENSDARG00000111299	168.431	90.968	142.652	103.596	131.255	165.376	-0.00656706	0.996869
alg14	450072	ENSDARG00000116808	85.2062	49.4391	46.5599	40.4519	43.4227	66.3484	-0.270569	0.851962
alg2	403068	ENSDARG00000070399	245.711	196.768	125.811	168.714	167.77	120.814	-0.313463	0.703425
alg3	553725	ENSDARG00000053155	278.406	168.093	166.427	207.193	255.602	296.092	0.308166	0.664001
alg5	751635	ENSDARG00000061235	286.333	231.375	184.258	229.885	181.586	179.24	-0.248929	0.716402
alg6	445327	ENSDARG00000017617	46.5662	68.226	30.7097	62.1579	56.2522	45.5527	0.172316	0.91557
alg8	327601	ENSDARG00000114612	113.939	129.531	96.0918	108.53	109.544	152.502	0.126034	0.906922
alg9	393598	ENSDARG00000012840	228.868	203.689	177.324	143.062	178.625	150.522	-0.369093	0.467158
alk	563509	ENSDARG00000095833	0	3.95513	4.95318	4.93316	18.7507	18.8152	2.25406	0.321925
alkbh1	553720	ENSDARG00000071164	43.5939	23.7308	12.8783	9.86633	16.777	29.7083	-0.509319	0.816268
alkbh2	569291	ENSDARG00000115064	3.96308	24.7196	14.8596	26.6391	38.4883	21.7861	0.997094	0.551935
alkbh3	792266	ENSDARG00000045606	92.1416	14.8317	53.4944	33.5455	46.3834	36.6402	-0.461045	0.803068
alkbh4	553475	ENSDARG00000052247	13.8708	14.8317	24.7659	33.5455	17.7638	15.8444	0.328876	0.888737
alkbh5	570158	ENSDARG00000063003	149.606	160.183	256.575	169.701	162.835	235.685	0.00470186	0.999206
alkbh6	317736	ENSDARG00000077253	41.6124	32.6298	35.6629	37.4921	35.5277	29.7083	-0.0973699	0.958791
alkbh7	550272	ENSDARG00000037906	19.8154	25.7083	15.8502	15.7861	22.6982	21.7861	-0.0262428	0.992853
alkbh8	556362	ENSDARG00000060256	72.3262	57.3494	66.3727	105.57	76.9767	99.0275	0.522315	0.447763
alms1	561882	ENSDARG00000074779	1511.92	1788.71	2196.24	1407.93	1673.75	2066.7	-0.094498	0.889377
alox12	322732	ENSDARG00000069463	386.4	781.138	432.908	370.974	435.214	509.992	-0.282143	0.692163
alox5a	567204	ENSDARG00000110148	178.339	101.845	142.652	735.042	488.506	380.266	1.92338	3.84514e-08
alox5ap	337376	ENSDARG00000113460	0.99077	0.988783	10.897	104.583	71.0554	49.5138	4.12837	2.17321e-05
alp3	100330410	ENSDARG00000098063	0.99077	15.8205	3.96255	10.853	22.6982	10.893	1.09707	0.689383
alpi.1	541539	ENSDARG00000015273	75.2985	104.811	79.251	103.596	117.439	69.3193	0.162886	0.894583
alpk1	100333928		228.868	334.209	246.669	289.083	313.828	254.501	0.0825165	0.92212
alpk2	559835	ENSDARG00000079637	43.5939	75.1475	57.4569	3.94653	34.5408	58.4262	-0.862551	0.615452
alpk3a	100321139	ENSDARG00000078989	58.4554	28.6747	39.6255	14.7995	30.5933	35.6499	-0.64535	0.637613
alpk3b	100534893	ENSDARG00000105630	7.92616	22.742	11.8876	2.9599	14.8032	23.7666	-0.0354166	0.993657
alpl	393982	ENSDARG00000015546	910.518	764.329	761.8	741.948	745.095	573.369	-0.241943	0.527214
als2a	557014	ENSDARG00000112274	251.656	256.095	317.994	338.415	285.208	208.948	0.0119168	0.992503
als2b	100318899	ENSDARG00000076924	604.37	583.382	584.476	468.651	539.823	597.136	-0.142459	0.757905
alx1	565176	ENSDARG00000110530	294.259	143.373	104.017	942.234	456.926	362.441	1.70148	0.00106859
alx3	566955		1674.4	1214.23	1042.15	2690.55	1714.21	1835.97	0.666905	0.0366842
alx4a	100006399	ENSDARG00000088332	1340.51	1295.31	965.871	2124.22	1485.25	1114.06	0.391201	0.394106
alx4b	497424	ENSDARG00000074442	148.616	193.801	148.596	157.861	171.717	207.958	0.130551	0.88471
alyref	560127	ENSDARG00000077732	638.056	790.037	818.266	673.87	802.334	709.037	-0.0397977	0.95465
amacr	553653	ENSDARG00000117070	11.8892	17.7981	19.8127	20.7193	19.7376	5.94165	-0.0932094	0.975621
ambra1a	100332642	ENSDARG00000008322	942.223	952.198	908.414	849.491	1056.95	973.44	0.039119	0.946592
ambra1b	559106	ENSDARG00000039878	679.668	743.564	811.332	660.057	715.488	811.035	-0.0313308	0.962307
amd1	792097	ENSDARG00000111778	659.853	714.89	649.858	1425.68	1075.7	1072.47	0.819846	6.05054e-05
amdhd2	402981	ENSDARG00000100376	178.339	102.833	96.0918	76.9574	32.567	41.5916	-1.31986	0.0352933
amer1	100885784	ENSDARG00000079624	927.361	859.252	960.918	714.322	1014.51	1133.87	0.0592306	0.935436
amer2	100101649	ENSDARG00000075222	222.923	205.667	167.418	93.7301	131.255	171.318	-0.588787	0.265365
amfr	406442	ENSDARG00000020218	503.311	537.898	555.747	460.758	552.653	528.807	-0.0503254	0.935803
amh	493624	ENSDARG00000014357	12.88	0	16.8408	5.9198	1.97376	3.9611	-1.32594	0.721941
amigo1	100144409	ENSDARG00000079620	0	10.8766	8.91573	0	4.9344	6.93193	-0.738264	0.902977
amigo3	100000131	ENSDARG00000074469	56.4739	48.4503	62.4101	49.3316	53.2915	53.4749	-0.100271	0.947531
ammecr1	393553	ENSDARG00000012892	1059.13	860.241	858.882	897.836	832.927	839.753	-0.112115	0.807672
amn1	751744	ENSDARG00000111705	24.7693	15.8205	26.7472	32.5589	19.7376	18.8152	0.078791	0.974459
amot	563421	ENSDARG00000078335	3347.81	3726.72	3482.09	2338.32	2765.24	2559.86	-0.46209	0.0047469
amotl1	101884950	ENSDARG00000019442	630.13	667.428	649.858	537.715	680.947	816.977	0.0639	0.928037
amotl2a	558920	ENSDARG00000061923	3679.72	3129.5	4070.53	2903.66	2876.76	3362.97	-0.250845	0.368691
amotl2b	559784	ENSDARG00000061948	872.869	814.757	912.377	683.737	571.404	697.154	-0.413348	0.0788148
ampd1	393867	ENSDARG00000033832	19.8154	9.88783	5.94382	8.8797	5.92128	27.7277	0.254502	0.944296
ampd2a	100330772	ENSDARG00000104491	291.286	356.951	369.508	456.811	385.87	429.779	0.322239	0.385679
ampd2b	571355	ENSDARG00000029952	70.3447	35.5962	35.6629	42.4252	31.5802	28.718	-0.463022	0.732873
ampd3a	556578	ENSDARG00000005800	0.99077	1.97757	11.8876	0.986633	8.88192	10.893	0.482835	0.925345
ampd3b	333997	ENSDARG00000117191	109.976	89.9792	56.4663	347.295	280.274	153.493	1.60695	0.000531901
amph	393804	ENSDARG00000007663	22.7877	32.6298	40.6161	5.9198	25.6589	44.5624	-0.334999	0.894708
amt	450000	ENSDARG00000010862	85.2062	69.2148	74.2978	68.0777	74.016	67.3387	-0.127066	0.915185
anapc1	568795	ENSDARG00000075687	1010.59	1023.39	983.702	863.304	1182.28	1064.55	0.0435331	0.945642
anapc10	798352	ENSDARG00000090152	17.8339	47.4616	23.7753	91.7569	14.8032	47.5332	0.790741	0.635933
anapc11	768140	ENSDARG00000116987	0	9.88783	6.93446	16.7728	4.9344	6.93193	0.767555	0.852564
anapc13	569473	ENSDARG00000078435	3.96308	18.7869	3.96255	22.6926	10.8557	11.8833	0.766056	0.777102
anapc15	751740	ENSDARG00000101285	3.96308	16.8093	12.8783	25.6525	6.90816	10.893	0.368831	0.909984
anapc16	550576	ENSDARG00000013822	38.64	31.641	20.8034	34.5322	24.672	14.8541	-0.298439	0.88547
anapc2	100318335	ENSDARG00000105035	131.772	147.329	125.811	173.647	141.124	140.619	0.169502	0.834151
anapc4	494046	ENSDARG00000032237	168.431	98.8783	149.586	151.941	168.757	123.784	0.0924959	0.935964
anapc5	322854	ENSDARG00000008461	207.071	107.777	111.942	132.209	121.386	165.376	-0.0266818	0.98641
anapc7	558402	ENSDARG00000063005	422.068	231.375	297.191	343.348	218.101	331.742	-0.0899171	0.932331
and1	794315	ENSDARG00000088514	3000.05	4189.47	2282.43	3852.8	4836.7	2653.94	0.260126	0.67662
and2	566702	ENSDARG00000079302	450.8	1293.33	847.985	700.509	829.966	574.36	-0.300423	0.716516
and3	561047	ENSDARG00000056873	208.062	246.207	145.624	310.789	439.162	165.376	0.6096	0.364239
and4	100192207		72.3262	99.867	30.7097	161.808	131.255	33.6694	0.687339	0.616149
angel1	569547	ENSDARG00000077567	14.8616	2.96635	0	13.8129	9.8688	1.98055	0.525674	0.918421
angel2	562704	ENSDARG00000016743	327.945	142.385	195.155	239.752	148.032	159.434	-0.282258	0.773831
angpt1	114407	ENSDARG00000030364	494.394	487.47	548.813	552.514	588.181	685.27	0.254476	0.468105
angpt2a	101101687	ENSDARG00000014946	46.5662	45.484	41.6068	151.941	128.294	177.259	1.77519	2.01764e-06
angpt2b	114408	ENSDARG00000053906	200.136	211.599	183.268	141.089	169.743	139.629	-0.401486	0.383721
angpt4	571050	ENSDARG00000076787	368.567	322.343	280.35	273.297	305.933	558.515	0.228215	0.783678
angptl1a	544656	ENSDARG00000012071	531.053	557.673	578.532	392.68	497.388	417.896	-0.35015	0.247047
angptl2a	569092	ENSDARG00000024030	114.929	103.822	91.1386	87.8103	94.7405	89.1248	-0.189867	0.840662
angptl2b	503514	ENSDARG00000068369	228.868	391.558	424.983	289.083	383.896	534.749	0.208202	0.816268
angptl3	114421	ENSDARG00000044365	55.4831	48.4503	45.5693	20.7193	41.449	59.4165	-0.298311	0.853557
angptl4	492647	ENSDARG00000035859	1407.88	1752.12	1985.24	1039.91	1405.32	1952.82	-0.226385	0.706673
angptl5	566212	ENSDARG00000056630	215.988	212.588	243.697	186.474	236.851	260.442	0.0244355	0.978658
angptl6	561927	ENSDARG00000020265	1.98154	6.92148	8.91573	10.853	25.6589	14.8541	1.52739	0.400431
angptl7	450053	ENSDARG00000110344	214.997	424.188	381.395	497.263	550.679	228.754	0.323038	0.723009
ank1a	449796	ENSDARG00000092143	114.929	160.183	187.23	41.4386	109.544	137.648	-0.679798	0.430095
ank1b	797662	ENSDARG00000116496	10.8985	33.6186	56.4663	27.6257	22.6982	61.3971	0.145697	0.95838
ank2a	568926	ENSDARG00000110704	44.5847	127.553	180.296	81.8905	86.8455	101.998	-0.380494	0.770494
ank2b	450043	ENSDARG00000043313	429.004	669.406	907.423	519.956	940.497	946.703	0.263121	0.742256
ank3a	103909035	ENSDARG00000111919	818.376	1449.56	1276.93	340.388	835.888	801.133	-0.842129	0.0708418
ank3b	100126016		1229.55	1573.15	1869.33	1591.44	1976.72	1885.48	0.223169	0.598659
ankar	368636	ENSDARG00000000516	0	1.97757	1.98127	0	5.92128	11.8833	2.16884	0.651059
ankdd1a	569271	ENSDARG00000098647	101.059	58.3382	39.6255	50.3183	35.5277	26.7374	-0.821853	0.411767
ankdd1b	562681	ENSDARG00000025866	0.99077	7.91026	17.8315	0	10.8557	16.8347	0.0506857	0.993955
ankef1a	566413	ENSDARG00000019135	16.8431	28.6747	12.8783	18.746	15.7901	5.94165	-0.528634	0.82115
ankef1b	100149106	ENSDARG00000060211	26.7508	24.7196	25.7566	32.5589	36.5146	58.4262	0.723244	0.503956
ankfy1	568480	ENSDARG00000111387	2767.22	2010.19	2056.56	1508.56	1297.75	1233.88	-0.758294	0.000320652
ankhb	323738	ENSDARG00000014969	41.6124	15.8205	14.8596	15.7861	43.4227	32.6791	0.346058	0.8822
ankhd1	563327	ENSDARG00000077860	4793.35	4281.43	4339.98	4940.07	4416.29	4350.28	0.0310568	0.948325
ankib1a	566524	ENSDARG00000060768	754.967	677.316	720.193	650.191	783.583	737.755	0.0127149	0.985479
ankib1b	561277	ENSDARG00000076829	655.89	780.149	660.755	620.592	647.393	586.243	-0.177367	0.646618
ankk1	100170831	ENSDARG00000056921	14.8616	45.484	24.7659	4.93316	28.6195	30.6985	-0.405755	0.878645
ankle2	559297	ENSDARG00000035607	272.462	285.758	289.266	341.375	277.313	235.685	0.0117071	0.991605
ankmy1	568987	ENSDARG00000062702	0.99077	16.8093	11.8876	0	7.89504	30.6985	0.378317	0.944287
ankmy2a	334389	ENSDARG00000005948	255.619	179.958	248.65	253.565	249.681	193.104	0.0253814	0.979461
ankra2	406403	ENSDARG00000111289	97.0955	68.226	114.914	83.8638	62.1735	78.2317	-0.321389	0.737735
ankrd10a	393955	ENSDARG00000037100	138.708	172.048	133.736	159.835	190.468	238.656	0.405955	0.465834
ankrd10b	559527	ENSDARG00000004771	76.2893	125.575	125.811	92.7435	155.927	136.658	0.233793	0.824074
ankrd11	327352	ENSDARG00000051886	5065.81	5687.48	5653.56	5116.68	5160.4	5532.67	-0.0534868	0.894259
ankrd12	393119	ENSDARG00000052419	2304.53	2133.79	2029.82	2238.67	2241.21	2070.67	0.0182673	0.970329
ankrd13a	556837	ENSDARG00000061901	552.85	456.818	459.656	421.292	503.309	447.604	-0.0986466	0.869162
ankrd13b	568981	ENSDARG00000014652	70.3447	82.069	93.1199	57.2247	66.121	98.0372	-0.149452	0.909114
ankrd13c	325167	ENSDARG00000103831	488.45	377.715	355.639	453.851	361.198	509.992	0.117014	0.873876
ankrd13d	562931	ENSDARG00000098140	13.8708	24.7196	10.897	24.6658	19.7376	11.8833	0.185754	0.947594
ankrd16	550225	ENSDARG00000113646	12.88	44.4952	41.6068	55.2514	33.5539	55.4554	0.543379	0.721106
ankrd1b	564159	ENSDARG00000076192	0	15.8205	1.98127	0	6.90816	7.9222	-0.263669	0.970385
ankrd22	393244	ENSDARG00000002298	12.88	13.843	7.9251	14.7995	13.8163	13.8639	0.293971	0.912519
ankrd24	565326	ENSDARG00000062103	173.385	227.42	238.744	89.7836	87.8323	82.1928	-1.29959	5.65112e-05
ankrd27	386887	ENSDARG00000089207	247.693	262.027	304.126	267.378	244.746	255.491	-0.0843682	0.907031
ankrd28b	560747	ENSDARG00000009023	574.647	490.436	661.745	767.6	587.194	668.436	0.228546	0.603783
ankrd33ba	568270	ENSDARG00000109989	25.76	22.742	14.8596	20.7193	18.7507	9.90275	-0.359779	0.874474
ankrd33bb	557905	ENSDARG00000015589	6.93539	0.988783	7.9251	0	19.7376	17.825	1.24493	0.740967
ankrd34ba	560938	ENSDARG00000077086	7.92616	21.7532	35.6629	14.7995	39.4752	45.5527	0.611361	0.760415
ankrd34bb	565548	ENSDARG00000061641	17.8339	28.6747	26.7472	24.6658	35.5277	59.4165	0.707204	0.589157
ankrd37	793783	ENSDARG00000056376	66.3816	27.6859	72.3165	47.3584	34.5408	82.1928	-0.020045	0.993657
ankrd39	100000333	ENSDARG00000041350	12.88	12.8542	7.9251	12.8262	4.9344	8.91248	-0.335627	0.915185
ankrd40	100005118	ENSDARG00000076490	223.914	224.454	169.399	202.26	161.848	164.386	-0.225168	0.736953
ankrd44	561373	ENSDARG00000026028	425.04	340.141	395.264	792.266	796.412	555.544	0.885802	0.000475489
ankrd46a	100329397	ENSDARG00000044328	63.4093	77.125	81.2322	82.8772	63.1603	56.4457	-0.131201	0.920237
ankrd46b	402888	ENSDARG00000015780	25.76	28.6747	43.588	58.2113	28.6195	77.2415	0.743097	0.51306
ankrd49	550246	ENSDARG00000023508	32.6954	19.7757	20.8034	32.5589	46.3834	16.8347	0.386487	0.841295
ankrd52a	553206	ENSDARG00000112185	994.733	1119.3	1198.67	1028.07	1512.89	1441.84	0.265767	0.49341
ankrd52b	564614		40.6216	27.6859	27.7378	19.7327	29.6064	36.6402	-0.159785	0.938359
ankrd54	436851	ENSDARG00000055743	107.003	96.9007	133.736	175.621	124.347	115.862	0.300554	0.709765
ankrd6b	378477	ENSDARG00000029370	326.954	508.234	584.476	529.822	446.07	612.98	0.162438	0.830223
ankrd9	492328	ENSDARG00000028804	13.8708	8.89904	1.98127	0.986633	5.92128	3.9611	-1.18732	0.727231
anks1ab	100003659	ENSDARG00000078901	302.185	285.758	319.976	80.9039	122.373	74.2706	-1.70977	3.48982e-08
anks1b	565408	ENSDARG00000003512	2070.71	2051.72	1971.37	861.331	1165.51	1075.44	-0.974021	2.68234e-08
anks3	100136846	ENSDARG00000038557	188.246	179.958	165.436	149.968	206.258	164.386	-0.0356536	0.971273
anks4b	431735	ENSDARG00000036846	9.9077	0	0.990637	0	0	0.990275	-3.3594	1
anks6	449657		3.96308	6.92148	9.90637	14.7995	15.7901	3.9611	0.732893	0.803187
ankzf1	553307	ENSDARG00000041904	130.782	141.396	118.876	143.062	155.927	169.337	0.260113	0.687613
anln	562517	ENSDARG00000060917	3522.19	3661.46	4012.08	2474.48	2857.02	2764.85	-0.467608	0.00401958
ano1	407698	ENSDARG00000102335	161.496	167.104	149.586	27.6257	83.8848	29.7083	-1.75956	0.00221606
ano10a	566425	ENSDARG00000057736	297.231	238.297	174.352	228.899	206.258	202.016	-0.15588	0.851962
ano10b	565195	ENSDARG00000018159	316.056	295.646	288.275	104.583	196.389	164.386	-0.951562	0.00859862
ano2	566373	ENSDARG00000101363	3.96308	1.97757	24.7659	20.7193	14.8032	9.90275	0.565082	0.870699
ano3	553392	ENSDARG00000058015	111.957	146.34	151.567	25.6525	81.9111	76.2512	-1.15695	0.0796578
ano5a	100534737	ENSDARG00000015731	876.832	740.598	683.539	454.838	602.984	502.07	-0.560791	0.0309602
ano5b	560102	ENSDARG00000036147	551.859	554.707	515.131	568.301	547.719	566.437	0.0530608	0.923053
ano6	100535437	ENSDARG00000061544	441.884	442.975	363.564	446.945	476.663	385.217	0.0681787	0.920687
ano8a	562947	ENSDARG00000076265	13.8708	3.95513	2.97191	0	6.90816	5.94165	-0.694749	0.890231
ano8b	562782	ENSDARG00000112701	54.4924	60.3157	46.5599	50.3183	83.8848	64.3679	0.299286	0.796906
ano9a	100126106	ENSDARG00000078941	7032.49	4526.65	4138.88	5177.85	3293.22	3375.85	-0.406068	0.354494
ano9b	559809	ENSDARG00000079324	15.8523	79.1026	52.5038	20.7193	42.4359	52.4846	-0.350768	0.868654
anos1a	30630	ENSDARG00000012896	189.237	104.811	191.193	66.1044	80.9242	147.551	-0.720101	0.318524
anos1b	30652	ENSDARG00000004932	389.373	1041.19	929.217	138.129	240.799	298.073	-1.80145	3.68668e-05
anp32a	335907	ENSDARG00000006487	2317.41	1786.73	1745.5	2834.6	1660.92	1763.68	0.0976339	0.899539
anp32b	322000	ENSDARG00000023330	993.743	984.827	867.798	1418.78	971.09	967.499	0.238216	0.585738
anp32e	406562	ENSDARG00000054804	1287.01	1050.09	856.901	1578.61	1291.83	1103.17	0.315093	0.434047
antxr1a	793153	ENSDARG00000025672	28.7323	19.7757	22.7846	41.4386	53.2915	27.7277	0.780556	0.484666
antxr1b	556289	ENSDARG00000074075	0	7.91026	12.8783	10.853	8.88192	1.98055	0.0630389	0.99276
antxr1c	563907	ENSDARG00000063612	1574.33	1645.33	1772.25	1238.22	1409.26	1426	-0.293335	0.185494
antxr1d	563132	ENSDARG00000060845	22.7877	40.5401	44.5787	10.853	22.6982	29.7083	-0.77056	0.585439
antxr2a	557239	ENSDARG00000111517	795.589	675.339	723.165	787.333	728.318	651.601	-0.0177393	0.977526
antxr2b	560841	ENSDARG00000112595	0	0	0	8.8797	2.96064	3.9611	4.85413	1
anxa11a	368215	ENSDARG00000077383	783.699	402.435	437.862	615.659	449.031	394.13	-0.154727	0.870889
anxa11b	353365	ENSDARG00000002632	762.893	662.484	605.279	915.595	734.239	564.457	0.124917	0.852564
anxa13	81880	ENSDARG00000013976	513.219	436.053	350.685	301.91	247.707	251.53	-0.698315	0.0198841
anxa13l	554118	ENSDARG00000013613	86.197	55.3718	113.923	34.5322	32.567	25.7472	-1.46027	0.0151597
anxa1a	334724	ENSDARG00000026726	313.083	425.177	242.706	147.008	155.927	144.58	-1.13228	0.000573753
anxa1b	353358	ENSDARG00000100095	173.385	266.971	84.2041	29.599	104.609	59.4165	-1.43785	0.0538664
anxa1c	494158	ENSDARG00000104359	454.764	945.276	476.496	132.209	387.844	284.209	-1.22235	0.0179042
anxa2a	325557	ENSDARG00000003216	254.628	519.111	298.182	85.8371	147.045	179.24	-1.37911	0.00210609
anxa3a	447893	ENSDARG00000112919	113.939	269.938	138.689	47.3584	126.321	93.0859	-0.970073	0.182289
anxa3b	492336	ENSDARG00000109335	385.41	244.229	322.948	353.215	222.048	321.839	-0.086571	0.929039
anxa4	353362	ENSDARG00000036456	261.563	244.229	231.809	415.372	230.93	202.016	0.201794	0.822556
anxa5b	337132	ENSDARG00000016470	275.434	195.779	147.605	136.155	155.927	100.018	-0.658249	0.228379
anxa6	353363	ENSDARG00000013335	61.4278	129.531	40.6161	0	33.5539	43.5721	-1.58621	0.678788
aoc2	541429	ENSDARG00000111584	405.225	499.335	466.59	632.432	500.348	491.176	0.244131	0.566053
aox5	64265	ENSDARG00000071475	21.7969	7.91026	7.9251	0	6.90816	21.7861	-0.391386	0.931659
aox6	570457	ENSDARG00000020054	105.022	103.822	114.914	77.944	77.9635	64.3679	-0.555562	0.325225
ap1ar	100332265	ENSDARG00000031496	61.4278	98.8783	36.6536	70.0509	92.7667	82.1928	0.314893	0.807672
ap1b1	562166	ENSDARG00000020621	2299.58	1954.82	1881.22	918.555	804.307	723.891	-1.32633	2.55576e-14
ap1g1	324466	ENSDARG00000102394	821.349	877.05	910.395	1109.96	928.654	1012.06	0.225747	0.444979
ap1g2	100007877	ENSDARG00000054337	195.182	159.194	118.876	159.835	106.583	100.018	-0.369014	0.635933
ap1m1	100330411	ENSDARG00000096249	1039.32	966.041	900.489	1108.98	771.74	705.076	-0.16834	0.759773
ap1m2	403021	ENSDARG00000096454	24.7693	18.7869	20.8034	11.8396	35.5277	19.8055	0.0617605	0.981793
ap1m3	445244	ENSDARG00000113914	6.93539	49.4391	15.8502	25.6525	28.6195	27.7277	0.183027	0.951823
ap1s1	393279	ENSDARG00000056803	72.3262	67.2372	71.3259	76.9574	65.1341	49.5138	-0.138281	0.915185
ap1s2	327237	ENSDARG00000114515	774.782	508.234	539.897	665.977	550.679	532.768	-0.0593497	0.942836
ap1s3a	550415	ENSDARG00000110439	17.8339	0	0	1.97327	0	1.98055	-2.17337	0.732873
ap1s3b	447897	ENSDARG00000027966	126.819	111.732	93.1199	22.6926	11.8426	24.7569	-2.48397	8.79954e-07
ap2a1	558153	ENSDARG00000054320	4331.65	3437.01	3287.92	2931.29	2636.94	2425.18	-0.468017	0.0296785
ap2b1	334632	ENSDARG00000035152	1665.48	1152.92	1225.42	1498.7	1230.64	1265.57	-0.0175507	0.981335
ap2m1a	321051	ENSDARG00000002790	1825.99	1487.13	1439.4	1107	929.641	820.938	-0.733883	0.000600624
ap2m1b	394001	ENSDARG00000033899	1244.41	897.815	1089.7	1048.79	939.51	844.705	-0.190044	0.661873
ap2s1	100148085	ENSDARG00000026967	504.302	362.883	322.948	352.228	274.353	259.452	-0.425668	0.34873
ap3b1	563316	ENSDARG00000100082	1013.56	1015.48	1037.2	869.224	849.704	899.17	-0.227953	0.351813
ap3b2	100000165	ENSDARG00000105296	36.6585	31.641	87.1761	33.5455	50.3309	45.5527	-0.264508	0.88547
ap3d1	563359	ENSDARG00000114974	1924.08	1815.4	2102.13	1877.56	1618.48	1695.35	-0.170239	0.575568
ap3m1	266798	ENSDARG00000029928	202.117	175.015	126.802	156.875	182.573	120.814	-0.130747	0.900045
ap3m2	415244	ENSDARG00000016128	54.4924	64.2709	76.279	92.7435	89.8061	118.833	0.627773	0.309279
ap3s1	449791		27.7416	40.5401	45.5693	41.4386	51.3178	32.6791	0.139838	0.938499
ap3s2	436812	ENSDARG00000039882	45.5754	25.7083	15.8502	27.6257	30.5933	22.7763	-0.105342	0.96587
ap4b1	393309	ENSDARG00000013726	53.5016	82.069	75.2884	82.8772	90.793	82.1928	0.279075	0.774365
ap4e1	570467	ENSDARG00000103684	177.348	168.093	112.933	194.367	176.652	183.201	0.273926	0.691546
ap4m1	436945	ENSDARG00000056871	36.6585	43.5064	50.5225	50.3183	51.3178	69.3193	0.387446	0.724663
ap4s1	368852	ENSDARG00000054220	0.99077	0	14.8596	14.7995	13.8163	17.825	1.55099	0.607402
ap5b1	100148772	ENSDARG00000078805	126.819	122.609	113.923	116.423	104.609	132.697	-0.0387516	0.97143
ap5m1	553681	ENSDARG00000031533	54.4924	11.8654	22.7846	34.5322	11.8426	7.9222	-0.715084	0.747061
ap5s1	556111	ENSDARG00000076755	50.5293	49.4391	63.4008	57.2247	53.2915	44.5624	-0.0750836	0.963095
ap5z1	100537934	ENSDARG00000078111	146.634	119.643	110.951	76.9574	77.9635	80.2123	-0.681959	0.154763
apaf1	58131	ENSDARG00000021239	226.886	290.702	282.332	280.204	335.539	247.569	0.110038	0.888737
apba1a	100003938	ENSDARG00000103848	84.2155	49.4391	64.3914	103.596	115.465	79.222	0.59092	0.413169
apba1b	565507	ENSDARG00000074328	7.92616	14.8317	34.6723	18.746	46.3834	46.5429	0.959378	0.53536
apba2a	100330365	ENSDARG00000063314	24.7693	35.5962	66.3727	48.345	59.2128	98.0372	0.697913	0.532603
apba2b	327160	ENSDARG00000060639	28.7323	51.4167	42.5974	13.8129	43.4227	58.4262	-0.0858785	0.971273
apbb1	565164	ENSDARG00000076560	764.875	856.286	937.143	798.186	896.087	805.094	-0.0336215	0.957001
apbb1ip	393607	ENSDARG00000016505	22.7877	52.4055	67.3633	373.934	270.405	142.6	2.46472	4.71791e-06
apbb2b	564990	ENSDARG00000113966	2298.59	2071.5	2235.87	1602.29	1944.15	1963.72	-0.261675	0.295461
apbb3	101883158	ENSDARG00000053771	1.98154	40.5401	22.7846	13.8129	14.8032	21.7861	-0.373845	0.908146
apc	386762	ENSDARG00000058868	6339.94	5994.99	5724.89	4563.18	4820.91	4554.28	-0.373721	0.0107519
apc2	565771	ENSDARG00000063007	46.5662	86.0241	198.127	85.8371	94.7405	140.619	-0.0421623	0.984899
apcdd1l	100001408	ENSDARG00000116773	175.366	224.454	153.549	111.49	105.596	155.473	-0.570842	0.26824
apeh	100333019	ENSDARG00000008703	210.043	161.172	142.652	137.142	172.704	140.619	-0.18996	0.817835
apela	100536023	ENSDARG00000113515	41.6124	22.742	31.7004	79.9173	92.7667	79.222	1.39103	0.0120295
apex1	406730	ENSDARG00000045843	707.41	406.39	457.674	784.373	539.823	629.815	0.314333	0.575102
apex2	393115	ENSDARG00000008472	61.4278	32.6298	25.7566	25.6525	55.2653	59.4165	0.228044	0.907031
aph1b	386808	ENSDARG00000111794	197.163	149.306	157.511	139.115	172.704	108.93	-0.260354	0.735855
api5	321676	ENSDARG00000033597	1022.47	859.252	925.255	1352.67	940.497	1019.98	0.239195	0.55227
apip	447941	ENSDARG00000003132	217.969	138.43	106.989	228.899	115.465	89.1248	-0.0961809	0.95465
apitd1	569270	ENSDARG00000111281	18.8246	21.7532	6.93446	17.7594	15.7901	0.990275	-0.459892	0.896626
apln	798375	ENSDARG00000053279	902.592	905.725	1176.88	2330.43	2062.58	2286.55	1.16193	4.17673e-11
aplnr2	793710	ENSDARG00000004447	126.819	249.173	187.23	153.915	306.92	242.617	0.320723	0.719795
aplnra	561935	ENSDARG00000002172	1512.91	856.286	792.51	264.418	185.533	293.121	-2.08914	4.84351e-11
aplnrb	565492	ENSDARG00000036670	1523.8	1228.07	1321.51	381.827	467.781	299.063	-1.82623	1.02369e-16
aplp1	404233	ENSDARG00000098368	97.0955	102.833	193.174	45.3851	75.9898	120.814	-0.69884	0.427784
aplp2	796801	ENSDARG00000054864	5574.07	4764.94	4609.43	2183.42	2360.62	2327.15	-1.12137	2.80305e-15
apmap	266637	ENSDARG00000017422	517.182	429.132	424.983	532.782	611.866	552.574	0.307642	0.343361
apnl	100002992	ENSDARG00000090900	12.88	6.92148	0.990637	0	0.98688	5.94165	-1.58595	0.719474
apoa1a	30355	ENSDARG00000110395	34.677	6.92148	21.794	13.8129	14.8032	9.90275	-0.718617	0.737318
apoa1b	100101640	ENSDARG00000101324	0	17.7981	16.8408	6.90643	20.7245	20.7958	0.483324	0.903609
apoa1bp	436891	ENSDARG00000058806	25.76	26.6971	54.485	41.4386	21.7114	29.7083	-0.20369	0.921117
apoa4b.2	570354	ENSDARG00000020866	0	0	13.8689	0	0	0	-4.66895	1
apoba	566465	ENSDARG00000042780	124.837	67.2372	66.3727	17.7594	48.3571	40.6013	-1.27609	0.0959342
apobb.1	321166	ENSDARG00000022767	367.576	132.497	257.566	75.9707	115.465	163.395	-1.09441	0.0668504
apobb.2	100330435	ENSDARG00000075016	38.64	13.843	8.91573	5.9198	7.89504	32.6791	-0.401331	0.900805
apobec2a	503736	ENSDARG00000018881	33.6862	9.88783	0	0	4.9344	2.97083	-2.46262	0.471085
apoc1	570638	ENSDARG00000092170	1.98154	5.9327	0	14.7995	12.8294	6.93193	2.12635	0.39914
apoda.1	767642	ENSDARG00000060345	0	0	3.96255	7.89306	8.88192	3.9611	2.38794	0.53536
apodb	567972	ENSDARG00000057437	12.88	47.4616	23.7753	13.8129	11.8426	11.8833	-1.16406	0.417076
apoeb	30314	ENSDARG00000040295	1121.55	1208.29	772.697	389.72	485.545	264.403	-1.44481	1.15039e-06
apof	793418	ENSDARG00000090980	181.311	197.757	290.257	253.565	307.907	165.376	0.118985	0.912065
apol1	560340	ENSDARG00000007425	98.0863	49.4391	31.7004	143.062	89.8061	118.833	0.972593	0.200115
apooa	641319	ENSDARG00000104696	53.5016	25.7083	23.7753	37.4921	52.3047	10.893	-0.0323974	0.992503
apoob	449837	ENSDARG00000109942	86.197	63.2821	49.5318	52.2915	69.0816	53.4749	-0.186721	0.894155
apool	541537	ENSDARG00000111985	232.831	258.072	329.882	331.509	287.182	305.005	0.170419	0.786699
apopt1	798687	ENSDARG00000092473	95.1139	42.5177	57.4569	85.8371	72.0423	38.6207	0.0104975	0.996184
appa	58083	ENSDARG00000104279	3505.35	2951.52	3668.33	2536.63	2719.84	3245.13	-0.252145	0.392144
appb	170846	ENSDARG00000109552	2916.83	2741.89	3021.44	2333.39	2403.05	2203.36	-0.322823	0.0603184
appbp2	322995	ENSDARG00000007566	586.536	476.593	496.309	427.212	517.125	530.787	-0.0801948	0.900805
appl1	571540	ENSDARG00000060734	381.447	336.186	302.144	236.792	262.51	306.985	-0.338913	0.41818
appl2	100000135	ENSDARG00000078139	242.739	173.037	248.65	180.554	203.297	233.705	-0.105542	0.905632
aprt	393641	ENSDARG00000003519	35.6677	45.484	41.6068	163.781	86.8455	93.0859	1.48539	0.00447082
aptx	405797	ENSDARG00000027143	36.6585	39.5513	27.7378	53.2782	48.3571	27.7277	0.315629	0.840022
aqp10a	436621	ENSDARG00000112181	0	0	0	3.94653	16.777	0	5.24536	0.233834
aqp10b	100034395	ENSDARG00000058678	0.99077	2.96635	9.90637	3.94653	0	2.97083	-1.00304	0.855729
aqp11	553476	ENSDARG00000100555	196.173	204.678	179.305	169.701	191.455	196.074	-0.0581883	0.948214
aqp1a.1	335821	ENSDARG00000023713	1961.73	1366.5	1301.7	3349.62	2664.58	1820.13	0.758828	0.0180736
aqp1a.2	559284	ENSDARG00000091027	0	0	0	9.86633	8.88192	6.93193	5.55472	0.0437203
aqp3a	406777	ENSDARG00000003808	245.711	532.954	386.348	631.445	595.089	428.789	0.506763	0.337328
aqp3b	568049	ENSDARG00000069518	0	0	0	9.86633	19.7376	7.9222	6.10198	0.00916379
aqp4	445293	ENSDARG00000010565	81.2432	107.777	31.7004	28.6124	29.6064	43.5721	-1.11671	0.216848
aqp7	334529	ENSDARG00000026787	290.296	299.601	366.536	100.637	74.016	83.1831	-1.89119	2.21404e-11
aqp8a.1	447923	ENSDARG00000115150	497.367	390.569	216.949	2729.03	2083.3	774.395	2.33811	0.00335988
aqp8b	555598	ENSDARG00000089749	22.7877	11.8654	5.94382	0	4.9344	0.990275	-2.77631	0.22928
aqp9a	606660		32.6954	13.843	19.8127	13.8129	31.5802	67.3387	0.764643	0.659856
aqp9b	570191	ENSDARG00000053480	0.99077	4.94391	3.96255	18.746	0.98688	1.98055	1.13353	0.792999
aqr	393436	ENSDARG00000016775	671.742	555.696	641.933	861.331	813.189	737.755	0.36786	0.15196
ar	100005148	ENSDARG00000114287	44.5847	73.1699	91.1386	154.901	165.796	156.463	1.1917	0.00755595
araf	403063	ENSDARG00000054533	1021.48	1015.48	969.834	1024.12	1043.13	1095.24	0.0728327	0.86466
arap1	101883993		112.948	151.284	102.036	135.169	90.793	80.2123	-0.258521	0.792013
arap3	558931	ENSDARG00000076801	4252.39	3733.64	3370.15	1890.39	2002.38	1814.18	-0.992681	8.97976e-11
arcn1a	266982	ENSDARG00000002792	972.936	866.174	763.781	1120.82	931.615	714.979	0.0884357	0.899769
arcn1b	399661	ENSDARG00000031214	625.176	517.133	537.916	637.365	549.692	433.741	-0.0519242	0.947531
arel1	100332031	ENSDARG00000100359	319.028	296.635	342.76	343.348	393.765	398.091	0.244215	0.553526
arf1	114428	ENSDARG00000009484	1375.19	1255.75	1108.52	1141.53	997.736	884.316	-0.306561	0.295551
arf2a	399477	ENSDARG00000014763	2118.27	1559.31	1361.14	1989.05	1472.43	1101.19	-0.14317	0.849068
arf2b	327026	ENSDARG00000016393	817.386	651.608	678.586	733.068	543.771	322.83	-0.424912	0.435637
arf3b	368822	ENSDARG00000112366	0.99077	9.88783	8.91573	6.90643	6.90816	15.8444	0.583185	0.875761
arf4a	445196	ENSDARG00000045989	271.471	257.083	193.174	270.337	270.405	195.084	0.0279356	0.977491
arf4b	550402	ENSDARG00000100339	0	0	5.94382	0	0	8.91248	0.584315	1
arf5	378724	ENSDARG00000115687	1200.81	1029.32	908.414	1310.25	1045.11	876.394	0.0422285	0.957001
arf6a	336063	ENSDARG00000101626	462.69	448.907	363.564	373.934	345.408	318.869	-0.296569	0.447081
arf6b	100003206	ENSDARG00000052928	644.001	632.821	527.019	843.571	591.141	528.807	0.122384	0.860638
arfgap1	100149572	ENSDARG00000101616	513.219	379.693	404.18	367.027	375.014	368.382	-0.224158	0.626648
arfgap2	641490	ENSDARG00000067601	1338.53	1378.36	1180.84	1366.49	1250.38	1119.01	-0.0611827	0.907031
arfgap3	402889	ENSDARG00000097583	27.7416	53.3943	11.8876	43.4118	45.3965	28.718	0.337286	0.872763
arfgef1	100329953	ENSDARG00000063474	1269.18	1505.92	1153.1	1611.17	1598.75	1350.74	0.215375	0.53536
arfgef2	100334572	ENSDARG00000074702	1425.72	1245.87	1381.94	1513.49	1457.62	1503.24	0.142507	0.650529
arfgef3	562652	ENSDARG00000077656	31.7046	27.6859	39.6255	64.1311	71.0554	78.2317	1.10796	0.0655156
arfip1	100003895	ENSDARG00000116473	259.582	298.612	233.79	287.11	264.484	287.18	0.082791	0.909967
arfip2a	449664	ENSDARG00000059244	107.003	176.003	201.099	140.102	165.796	186.172	0.0235105	0.987
arfip2b	550342	ENSDARG00000109805	175.366	168.093	126.802	186.474	189.481	166.366	0.205694	0.773273
arfrp1	503602	ENSDARG00000057857	123.846	72.1811	47.5506	128.262	60.1997	94.0761	0.214076	0.893322
arg2	322614	ENSDARG00000039269	2.97231	15.8205	15.8502	85.8371	80.9242	44.5624	2.60875	0.00137975
arglu1a	406834	ENSDARG00000019223	574.647	735.654	701.371	776.48	742.134	767.463	0.184471	0.635933
arglu1b	393131	ENSDARG00000018319	447.828	387.603	460.646	484.437	451.991	523.856	0.172095	0.704755
arhgap1	550478	ENSDARG00000024324	261.563	165.127	195.155	238.765	159.875	200.036	-0.0547637	0.96147
arhgap10	692277	ENSDARG00000078326	818.376	936.377	847.985	497.263	698.711	588.223	-0.544759	0.0284461
arhgap11a	406608	ENSDARG00000100019	750.013	759.385	775.669	737.015	719.436	787.269	-0.026352	0.963285
arhgap12a	563267	ENSDARG00000008548	160.505	208.633	113.923	97.6767	131.255	108.93	-0.515789	0.412685
arhgap12b	393848	ENSDARG00000109973	391.354	290.702	343.751	417.346	400.673	464.439	0.322155	0.400445
arhgap15	100003547	ENSDARG00000062349	0.99077	5.9327	6.93446	120.369	74.016	56.4457	4.17781	5.05791e-08
arhgap17a	550254	ENSDARG00000113457	627.158	644.686	634.998	432.145	571.404	429.779	-0.411804	0.156835
arhgap17b	100141341	ENSDARG00000062263	355.687	532.954	347.714	317.696	371.067	220.831	-0.442781	0.393142
arhgap18	100004252	ENSDARG00000074740	164.468	154.25	195.155	156.875	126.321	133.687	-0.30175	0.61975
arhgap19	100537002	ENSDARG00000083189	692.548	502.302	543.86	378.867	411.529	478.303	-0.454677	0.155473
arhgap20	796434	ENSDARG00000089326	21.7969	24.7196	11.8876	8.8797	47.3703	37.6305	0.68469	0.724415
arhgap20b	100002649		351.723	366.838	377.433	270.337	270.405	291.141	-0.3978	0.18128
arhgap21b	326745	ENSDARG00000075673	2176.72	1981.52	2106.09	1984.12	2045.8	2259.81	0.00583278	0.99276
arhgap22	562503	ENSDARG00000021255	9.9077	21.7532	21.794	54.2648	56.2522	57.436	1.6516	0.0204263
arhgap23a	100006233	ENSDARG00000052950	3079.31	3488.42	3198.77	2514.93	3081.04	2563.82	-0.25931	0.290618
arhgap23b	562244	ENSDARG00000026840	0	2.96635	0.990637	7.89306	2.96064	3.9611	1.90423	1
arhgap24	100005116	ENSDARG00000100973	217.969	332.231	188.221	227.912	235.864	155.473	-0.253912	0.754186
arhgap25	562468	ENSDARG00000061784	3.96308	44.4952	17.8315	293.03	142.111	128.736	3.08839	8.10651e-05
arhgap27	564211	ENSDARG00000104255	173.385	284.769	166.427	421.292	399.686	284.209	0.823322	0.0396498
arhgap27l	566523	ENSDARG00000061798	1104.71	1308.16	1196.69	629.472	660.223	504.05	-1.00883	1.44252e-07
arhgap28	492794		92.1416	185.891	182.277	258.498	288.169	169.337	0.63737	0.293827
arhgap29a	564805	ENSDARG00000026329	1567.4	1570.19	1594.93	957.034	1103.33	1053.65	-0.60383	0.000119715
arhgap29b	378998	ENSDARG00000017748	1011.58	821.678	772.697	840.611	792.465	708.047	-0.154597	0.734265
arhgap31	101885883	ENSDARG00000059472	3995.78	3701.01	3873.39	2520.85	2784.98	3176.8	-0.447833	0.0119279
arhgap32a	562449	ENSDARG00000075334	0.99077	9.88783	13.8689	7.89306	18.7507	11.8833	0.638564	0.846076
arhgap32b	569434	ENSDARG00000074184	920.426	967.029	1193.72	982.686	1063.86	1118.02	0.0385244	0.952947
arhgap33	569720	ENSDARG00000011333	930.333	838.488	1013.42	1484.88	1423.08	1417.08	0.636476	0.000155561
arhgap35	564565	ENSDARG00000113130	1989.47	1932.08	1942.64	1537.17	1673.75	1651.78	-0.270174	0.156619
arhgap39	101884459	ENSDARG00000100007	17.8339	32.6298	15.8502	46.3717	51.3178	27.7277	0.919333	0.414001
arhgap42a	566275	ENSDARG00000116136	700.475	781.138	973.796	613.686	788.517	863.52	-0.116002	0.855626
arhgap44	100333556	ENSDARG00000104549	0	5.9327	8.91573	0.986633	3.94752	13.8639	0.340051	0.956457
arhgap4a	393416	ENSDARG00000039265	2.97231	7.91026	40.6161	122.342	75.9898	90.115	2.48577	0.013346
arhgap4b	561231	ENSDARG00000015003	287.323	297.624	324.929	854.424	608.905	509.992	1.1169	3.88858e-05
arhgap5	795752	ENSDARG00000061294	3316.11	3659.48	3386	2537.62	3159	3357.03	-0.194678	0.540322
arhgap6	559813	ENSDARG00000059672	1022.47	962.085	1003.52	1192.84	1247.42	1037.81	0.21908	0.446502
arhgap9	100334461		10.8985	20.7644	20.8034	250.605	171.717	90.115	3.28789	4.89827e-09
arhgdia	406770	ENSDARG00000043795	1722.95	1214.23	1268.02	2103.5	1497.1	1101.19	0.161048	0.824538
arhgdig	394132	ENSDARG00000004034	257.6	309.489	226.856	1287.56	841.809	620.903	1.79246	7.22465e-09
arhgef10	334278	ENSDARG00000115629	2312.46	2391.87	2266.58	1079.38	1113.2	1044.74	-1.10654	2.02216e-17
arhgef10la	799435	ENSDARG00000088630	292.277	292.68	258.556	274.284	459.886	363.431	0.379868	0.423584
arhgef10lb	567649	ENSDARG00000074244	147.625	175.015	153.549	192.393	204.284	180.23	0.276808	0.615838
arhgef11	565268		764.875	865.185	933.18	702.483	776.675	1023.94	-0.0342695	0.964694
arhgef12a	562455	ENSDARG00000030532	855.035	802.891	918.32	1274.73	1194.13	990.275	0.425154	0.0693992
arhgef12b	571031	ENSDARG00000100913	4012.62	3435.03	3542.52	2564.26	2765.24	3007.47	-0.398622	0.0287831
arhgef15	101882903	ENSDARG00000100293	0	0	0	0	15.7901	0	4.85306	1
arhgef16	567180	ENSDARG00000077114	50.5293	101.845	99.0637	47.3584	67.1079	97.047	-0.249536	0.859398
arhgef18a	407987	ENSDARG00000011157	284.351	241.263	183.268	151.941	185.533	168.347	-0.486917	0.292131
arhgef18b	562264	ENSDARG00000042308	484.487	509.223	404.18	588.033	561.535	407.003	0.155138	0.799247
arhgef19	569202	ENSDARG00000078853	80.2524	148.317	101.045	140.102	110.531	87.1442	0.0352952	0.980449
arhgef1a	368266	ENSDARG00000040380	1099.76	958.13	1007.48	957.034	889.179	670.416	-0.284545	0.419228
arhgef1b	557983	ENSDARG00000055837	1919.12	1600.84	1745.5	2333.39	1968.83	1907.27	0.23792	0.405248
arhgef2	561276	ENSDARG00000116451	1068.05	1004.6	1093.66	1440.48	1279.98	1210.12	0.311948	0.169221
arhgef25a	100331456	ENSDARG00000100606	3107.06	2819.02	3024.41	2521.83	2586.61	2706.42	-0.195746	0.376478
arhgef25b	569561	ENSDARG00000114202	78.2709	174.026	99.0637	64.1311	101.649	65.3582	-0.604205	0.47269
arhgef28	559941	ENSDARG00000112290	206.08	203.689	182.277	531.795	450.017	543.661	1.36546	2.60785e-10
arhgef3	570228	ENSDARG00000013834	234.813	175.015	245.678	238.765	250.668	320.849	0.305809	0.585439
arhgef33	559216	ENSDARG00000097964	28.7323	36.585	43.588	20.7193	33.5539	45.5527	-0.125684	0.953713
arhgef37	101883655	ENSDARG00000115787	336.862	363.872	298.182	220.019	257.576	294.112	-0.372346	0.351048
arhgef38	100317614	ENSDARG00000079377	30.7139	7.91026	11.8876	2.9599	5.92128	16.8347	-0.974177	0.700485
arhgef39	492469	ENSDARG00000114412	163.477	147.329	117.886	142.075	155.927	117.843	-0.0438649	0.968964
arhgef3l	553761	ENSDARG00000037554	11.8892	16.8093	32.691	355.188	233.891	177.259	3.64198	1.66503e-13
arhgef4	559017	ENSDARG00000012914	927.361	1095.57	849.966	1044.84	1032.28	898.18	0.0505298	0.932843
arhgef40	100151026	ENSDARG00000078979	2979.25	2923.83	3031.35	2442.9	2449.44	2694.54	-0.235872	0.231172
arhgef5	100537160		168.431	314.433	269.453	286.124	264.484	218.851	0.0325026	0.976169
arhgef6	558288	ENSDARG00000006683	390.364	448.907	464.609	797.199	575.351	627.834	0.617471	0.0179688
arhgef7a	553493	ENSDARG00000114088	148.616	185.891	293.229	294.017	272.379	348.577	0.543566	0.291404
arhgef7b	494081	ENSDARG00000073848	2015.23	2114.02	2191.29	1104.04	1304.66	1291.32	-0.77252	5.72479e-07
arhgef9a	559868	ENSDARG00000061746	8.91693	7.91026	23.7753	10.853	17.7638	7.9222	-0.151997	0.965329
arhgef9b	560923	ENSDARG00000110276	3229.91	3410.31	3134.38	2447.84	2691.22	2511.34	-0.353503	0.0287831
arid1aa	100141358	ENSDARG00000101710	4492.15	4360.53	5062.15	5215.34	4707.42	5598.03	0.157576	0.598299
arid1ab	568161	ENSDARG00000101891	4471.35	4436.67	4826.38	5367.28	5312.38	5776.28	0.260813	0.141975
arid1b	569589	ENSDARG00000092503	1274.13	1235.98	1399.77	1242.17	1662.89	1484.42	0.166929	0.670127
arid2	566352	ENSDARG00000007413	1853.73	1727.4	2007.03	2119.29	2019.16	2154.84	0.17144	0.528315
arid3a	562799	ENSDARG00000070843	380.456	523.066	560.701	700.509	540.81	564.457	0.302486	0.495432
arid3b	571249	ENSDARG00000104034	4326.69	4075.76	4231.01	3112.83	3331.71	3677.88	-0.3197	0.0757058
arid3c	569444	ENSDARG00000114447	2819.73	3232.33	2554.85	2627.4	3118.54	2495.49	-0.0625992	0.907031
arid4a	327404	ENSDARG00000043873	2114.3	2233.66	2557.82	2437.97	2622.14	2705.43	0.169279	0.571831
arid4b	100537923	ENSDARG00000090656	907.546	1080.74	1156.07	823.838	999.71	973.44	-0.168897	0.682982
arid5a	100462698	ENSDARG00000077120	0.99077	4.94391	8.91573	307.829	120.399	90.115	5.12533	3.17811e-11
arid5b	100536827	ENSDARG00000037196	584.554	510.212	560.701	371.961	443.109	572.379	-0.254827	0.590641
arid6	572528	ENSDARG00000069988	20.8062	11.8654	15.8502	6.90643	31.5802	18.8152	0.23998	0.933505
arih1	327005	ENSDARG00000109413	415.133	430.12	429.936	475.557	458.899	388.188	0.0527327	0.936104
arih1l	405859	ENSDARG00000112965	186.265	172.048	198.127	225.939	235.864	155.473	0.149738	0.855729
arih2	406417	ENSDARG00000012848	596.444	361.894	464.609	562.381	401.66	374.324	-0.0883848	0.92155
arl1	436746	ENSDARG00000101680	166.449	165.127	160.483	153.915	167.77	99.0275	-0.225943	0.784207
arl10	560654	ENSDARG00000117130	9.9077	7.91026	5.94382	0.986633	3.94752	1.98055	-1.78084	0.507447
arl11	324689	ENSDARG00000036637	15.8523	4.94391	4.95318	3.94653	11.8426	3.9611	-0.382512	0.923237
arl13b	286784	ENSDARG00000012763	156.542	134.474	165.436	171.674	170.73	209.938	0.275086	0.651059
arl14	556921	ENSDARG00000063223	1.98154	4.94391	2.97191	0	4.9344	9.90275	0.583824	0.917255
arl14ep	751672	ENSDARG00000001210	52.5108	71.1923	83.2135	104.583	53.2915	47.5332	-0.0105057	0.996158
arl15a	567657	ENSDARG00000114295	0	1.97757	7.9251	7.89306	0.98688	1.98055	0.133348	0.987146
arl15b	560030	ENSDARG00000109775	322	313.444	366.536	511.076	381.923	325.801	0.282634	0.58238
arl16	100037345	ENSDARG00000110386	36.6585	19.7757	11.8876	32.5589	21.7114	10.893	-0.0681627	0.981534
arl2	449774	ENSDARG00000112191	35.6677	15.8205	30.7097	31.5723	48.3571	44.5624	0.598924	0.648117
arl2bp	393976	ENSDARG00000114401	1.98154	25.7083	8.91573	31.5723	33.5539	18.8152	1.19721	0.522663
arl3	797451	ENSDARG00000113228	158.523	212.588	260.538	288.097	170.73	206.968	0.0759628	0.94813
arl4aa	393834	ENSDARG00000099918	222.923	170.071	132.745	86.8237	98.688	62.3873	-1.08453	0.0150176
arl4ab	338267	ENSDARG00000110649	342.807	276.859	340.779	148.982	103.622	111.901	-1.39773	1.39492e-06
arl4ca	550444	ENSDARG00000057606	31.7046	44.4952	7.9251	148.982	129.281	94.0761	2.14595	0.00194886
arl4cb	406531	ENSDARG00000110274	169.422	172.048	186.24	181.54	144.085	245.588	0.114242	0.906705
arl4d	323573	ENSDARG00000114046	134.745	97.8895	91.1386	77.944	75.9898	102.989	-0.333686	0.696079
arl5a	436611	ENSDARG00000117003	50.5293	57.3494	64.3914	45.3851	71.0554	96.0567	0.302702	0.806867
arl5c	393819	ENSDARG00000035719	90.1601	72.1811	109.961	75.9707	100.662	72.2901	-0.129459	0.916263
arl6	494134	ENSDARG00000113281	90.1601	58.3382	47.5506	70.0509	67.1079	49.5138	-0.0706442	0.966345
arl6ip1	394087	ENSDARG00000112340	315.065	331.242	383.376	382.814	345.408	323.82	0.0310078	0.968457
arl6ip4	553796	ENSDARG00000116805	42.6031	20.7644	2.97191	9.86633	13.8163	22.7763	-0.513984	0.862367
arl6ip5a	450076	ENSDARG00000114089	16.8431	31.641	13.8689	14.7995	33.5539	28.718	0.305636	0.894445
arl6ip5b	436790	ENSDARG00000016238	88.1786	88.0016	57.4569	34.5322	52.3047	46.5429	-0.80876	0.252507
arl6ip6	100037347	ENSDARG00000071013	227.877	305.534	265.491	173.647	208.232	186.172	-0.492009	0.196307
arl8	327551	ENSDARG00000094709	370.548	373.76	398.236	427.212	445.083	460.478	0.222176	0.543166
arl8a	567222	ENSDARG00000078686	617.25	538.887	610.232	527.849	367.119	414.925	-0.431324	0.178495
arl8ba	337424	ENSDARG00000006915	165.459	165.127	148.596	147.008	134.216	116.852	-0.267496	0.675065
arl8bb	562445	ENSDARG00000070318	118.892	63.2821	66.3727	70.0509	95.7274	70.3095	-0.0741523	0.963158
arl9	751670	ENSDARG00000071881	336.862	304.545	347.714	335.455	263.497	344.616	-0.0680281	0.92813
armc1	494066	ENSDARG00000013861	275.434	221.487	150.577	236.792	173.691	177.259	-0.139679	0.891507
armc10	557740	ENSDARG00000062960	116.911	69.2148	82.2229	107.543	86.8455	66.3484	-0.0414408	0.977329
armc1l	321240	ENSDARG00000020887	216.979	141.396	125.811	189.434	134.216	137.648	-0.0698327	0.955834
armc2	555846	ENSDARG00000022660	3.96308	5.9327	10.897	6.90643	23.6851	24.7569	1.41242	0.440369
armc4	799229	ENSDARG00000111868	8.91693	13.843	10.897	0	18.7507	15.8444	0.0395848	0.994177
armc5	569910	ENSDARG00000078083	363.613	522.077	480.459	333.482	444.096	536.729	-0.0558412	0.954438
armc6	555425	ENSDARG00000103770	105.022	80.0914	107.979	149.968	152.966	109.921	0.494342	0.405939
armc7	767659	ENSDARG00000061197	34.677	11.8654	16.8408	34.5322	18.7507	21.7861	0.244209	0.920016
armc8	571528	ENSDARG00000110157	148.616	139.418	170.39	141.089	113.491	195.084	-0.0278772	0.981534
armc9	100334308	ENSDARG00000087299	124.837	183.914	190.202	144.048	188.494	239.647	0.197543	0.830539
armt1	541518	ENSDARG00000112391	98.0863	89.9792	130.764	115.436	124.347	134.677	0.23203	0.784335
arnt	493634	ENSDARG00000115999	558.794	786.082	622.12	651.178	680.947	580.301	-0.0405921	0.957033
arnt2	64277	ENSDARG00000103697	1290.97	1444.61	1630.59	1214.55	1435.91	1703.27	-0.00412706	0.996158
arntl1a	58098	ENSDARG00000006791	345.779	235.33	244.687	287.11	246.72	226.773	-0.118612	0.888737
arntl1b	352935	ENSDARG00000114562	308.13	211.599	261.528	296.977	301.985	286.19	0.180151	0.7704
arntl2	58099	ENSDARG00000116327	520.154	568.55	515.131	537.715	533.902	470.381	-0.0567167	0.923237
arpc1a	394243	ENSDARG00000008383	917.453	624.911	413.096	454.838	374.028	293.121	-0.801434	0.0591399
arpc1b	335474	ENSDARG00000027063	328.936	166.115	242.706	1897.3	921.746	788.259	2.28972	3.93984e-09
arpc2	327068	ENSDARG00000075989	1379.15	974.94	903.461	2088.7	1349.07	986.314	0.441599	0.38979
arpc3	415204	ENSDARG00000057882	382.437	250.162	207.043	561.394	409.555	307.976	0.607109	0.235051
arpc4	114456	ENSDARG00000054063	235.803	249.173	225.865	468.651	356.264	262.423	0.613224	0.119239
arpc4l	445305	ENSDARG00000058225	382.437	298.612	345.732	620.592	427.319	412.945	0.508709	0.165101
arpc5a	336504	ENSDARG00000039142	832.247	730.71	475.506	990.579	733.252	546.632	0.155516	0.854308
arpc5b	399482	ENSDARG00000019062	221.933	176.992	183.268	562.381	318.762	273.316	0.987677	0.0143206
arpc5la	393550	ENSDARG00000041720	84.2155	70.2036	82.2229	76.9574	74.016	112.891	0.157046	0.896626
arpc5lb	556104	ENSDARG00000035433	44.5847	31.641	19.8127	37.4921	21.7114	14.8541	-0.37486	0.849811
arpin	550477	ENSDARG00000115959	8.91693	31.641	25.7566	32.5589	34.5408	21.7861	0.422616	0.835312
arpp19a	393603	ENSDARG00000109679	680.659	590.303	555.747	651.178	441.135	497.118	-0.200727	0.700991
arpp19b	393947	ENSDARG00000039880	218.96	198.745	108.97	255.538	154.94	128.736	0.0339672	0.981578
arpp21	564134	ENSDARG00000061081	0.99077	2.96635	16.8408	13.8129	9.8688	4.95138	0.461386	0.914006
arrb1	553266	ENSDARG00000043241	244.72	174.026	151.567	195.353	123.36	113.882	-0.398696	0.588742
arrb2a	321378	ENSDARG00000039215	200.136	185.891	221.903	267.378	232.904	269.355	0.340274	0.427784
arrb2b	394099	ENSDARG00000011545	2204.46	1526.68	1464.16	1568.75	1056.95	994.236	-0.521237	0.14618
arrdc1a	100006005	ENSDARG00000068148	36.6585	51.4167	32.691	16.7728	21.7114	41.5916	-0.592956	0.674586
arrdc1b	570029	ENSDARG00000109340	42.6031	78.1138	66.3727	60.1846	65.1341	36.6402	-0.20806	0.893413
arrdc2	335206	ENSDARG00000020761	284.351	304.545	307.097	235.805	240.799	299.063	-0.208085	0.693575
arrdc3a	566685	ENSDARG00000052690	796.579	748.508	602.307	735.042	631.603	714.979	-0.0448831	0.947969
arrdc3b	447866	ENSDARG00000036028	1057.15	793.004	874.732	872.184	683.908	817.967	-0.198838	0.648117
arsa	541416	ENSDARG00000042270	128.8	175.015	134.727	103.596	98.688	71.2998	-0.680689	0.176053
arsb	100538007	ENSDARG00000108788	147.625	173.037	144.633	490.357	356.264	289.16	1.28748	3.34104e-05
arsg	564790	ENSDARG00000101715	51.5201	76.1363	43.588	47.3584	73.0291	120.814	0.494078	0.667198
arsh	100332997	ENSDARG00000002299	176.357	194.79	133.736	105.57	108.557	146.561	-0.485263	0.389182
arsia	100329483	ENSDARG00000077606	0.99077	3.95513	4.95318	46.3717	41.449	30.6985	3.5816	0.000157593
arsk	562412	ENSDARG00000115105	26.7508	40.5401	51.5131	70.0509	45.3965	45.5527	0.438505	0.724663
artn	101882107		2.97231	5.9327	8.91573	7.89306	11.8426	15.8444	0.997426	0.680448
arv1	568203	ENSDARG00000074757	65.3908	41.5289	59.4382	66.1044	94.7405	75.2609	0.505188	0.552779
arvcfa	572216	ENSDARG00000074329	0.99077	2.96635	6.93446	2.9599	10.8557	1.98055	0.536508	0.915185
arvcfb	564669	ENSDARG00000061688	3068.42	3478.54	3205.7	2038.38	2564.9	2235.05	-0.51215	0.00418158
arxa	30657	ENSDARG00000058011	5.94462	20.7644	27.7378	12.8262	7.89504	24.7569	-0.259825	0.933505
as3mt	664699	ENSDARG00000027572	44.5847	25.7083	15.8502	34.5322	15.7901	26.7374	-0.160748	0.949883
asah1a	450068	ENSDARG00000112187	162.486	160.183	130.764	255.538	323.697	235.685	0.84578	0.00913283
asah1b	393549	ENSDARG00000116060	211.034	115.688	135.717	129.249	119.413	107.94	-0.37491	0.616149
asah2	493602	ENSDARG00000012829	4.95385	45.484	26.7472	6.90643	7.89504	54.4651	-0.156343	0.968499
asap1a	100170829	ENSDARG00000029463	2278.77	2204.99	1889.14	1541.12	1538.55	1524.03	-0.469157	0.00675646
asap1b	565859	ENSDARG00000039729	2633.47	2676.63	2302.24	1499.68	1380.65	1175.46	-0.90835	7.45734e-08
asap2a	570669	ENSDARG00000010181	1043.28	1099.53	1283.87	697.549	756.937	856.588	-0.568256	0.00713718
asap2b	560581	ENSDARG00000019564	392.345	530.976	347.714	306.843	349.356	300.053	-0.410548	0.306308
asap3	664764	ENSDARG00000021896	118.892	300.59	328.891	258.498	225.996	401.061	0.242795	0.833626
asb1	554673	ENSDARG00000026635	5.94462	13.843	22.7846	0	28.6195	20.7958	0.215013	0.963674
asb12a	322927	ENSDARG00000110715	103.04	94.9231	70.3352	85.8371	57.2391	68.329	-0.343822	0.715361
asb12b	445507	ENSDARG00000116721	34.677	2.96635	5.94382	0	4.9344	1.98055	-2.65603	0.310404
asb13a.1	436801	ENSDARG00000109650	2.97231	4.94391	4.95318	0	12.8294	0	-0.00435795	0.999905
asb13b	556808	ENSDARG00000089833	0	8.89904	4.95318	10.853	5.92128	15.8444	1.23536	0.705331
asb15a	100151067	ENSDARG00000115823	0	16.8093	0.990637	0.986633	2.96064	2.97083	-1.36364	0.795289
asb2a.1	567986	ENSDARG00000003797	31.7046	22.742	9.90637	3.94653	14.8032	12.8736	-1.0251	0.594125
asb2b	402848	ENSDARG00000102490	6.93539	28.6747	59.4382	3.94653	26.6458	26.7374	-0.729438	0.770894
asb3	334210	ENSDARG00000005246	89.1693	94.9231	66.3727	85.8371	116.452	107.94	0.308695	0.721106
asb4	550321	ENSDARG00000034988	21.7969	10.8766	10.897	9.86633	15.7901	20.7958	0.0923433	0.975431
asb6	553600	ENSDARG00000007125	112.948	148.317	184.258	144.048	171.717	151.512	0.0687805	0.952587
asb7	405798	ENSDARG00000006494	137.717	171.059	166.427	147.008	195.402	203.006	0.198781	0.791217
asb8	327200	ENSDARG00000003383	76.2893	67.2372	61.4195	57.2247	64.1472	42.5818	-0.32189	0.759651
ascc1	550273	ENSDARG00000077760	85.2062	16.8093	28.7285	46.3717	34.5408	31.6888	-0.215448	0.928037
ascc2	393414	ENSDARG00000013058	244.72	174.026	203.081	219.033	223.035	253.51	0.161701	0.820391
ascc3	100332599	ENSDARG00000086678	781.718	697.092	660.755	789.306	686.869	608.029	-0.0378041	0.95641
ascl1a	30466	ENSDARG00000038386	0.99077	4.94391	0.990637	14.7995	23.6851	17.825	3.02297	0.0462404
ascl1b	30478	ENSDARG00000101628	0	4.94391	16.8408	0	11.8426	5.94165	-0.292711	0.96587
asf1ba	386897	ENSDARG00000101037	207.071	137.441	125.811	215.086	131.255	128.736	0.014548	0.99276
asf1bb	792029	ENSDARG00000043713	277.416	148.317	183.268	237.779	159.875	207.958	-0.00803582	0.995731
ash1l	563799	ENSDARG00000070981	4135.48	4582.02	4925.45	4136.95	4636.36	5436.61	0.0587409	0.910172
ash2l	558193	ENSDARG00000060392	544.924	353.984	497.3	490.357	481.598	444.634	0.0209282	0.980101
asic1a	791696	ENSDARG00000008329	11.8892	5.9327	19.8127	14.7995	9.8688	6.93193	-0.25196	0.940342
asic1b	407672	ENSDARG00000101866	62.4185	68.226	111.942	104.583	65.1341	81.2026	0.0487493	0.974703
asic1c	407670	ENSDARG00000098428	42.6031	31.641	46.5599	10.853	7.89504	48.5235	-0.844805	0.629254
asic2	407669	ENSDARG00000006849	0	3.95513	25.7566	0.986633	1.97376	12.8736	-0.908222	0.858906
asic4a	407668	ENSDARG00000025162	3.96308	1.97757	0	0	0.98688	10.893	0.999602	1
asip1	798574	ENSDARG00000077858	0	0	2.97191	1.97327	5.92128	8.91248	2.49978	0.567472
asip2b	796595	ENSDARG00000114760	56.4739	29.6635	20.8034	13.8129	8.88192	10.893	-1.67077	0.109391
asl	393423	ENSDARG00000033361	27.7416	20.7644	34.6723	40.4519	22.6982	27.7277	0.127785	0.955032
asmt	100141344	ENSDARG00000098249	0	10.8766	11.8876	0	13.8163	17.825	0.474938	0.934166
asmt2	568256	ENSDARG00000109921	10.8985	33.6186	32.691	48.345	49.344	13.8639	0.530954	0.789089
asmtl	324134	ENSDARG00000114151	21.7969	89.9792	88.1667	95.7034	78.9504	85.1637	0.377886	0.799607
asna1	325704	ENSDARG00000018190	477.551	400.457	386.348	468.651	405.608	268.365	-0.14602	0.850209
asns	394138	ENSDARG00000016375	498.357	436.053	393.283	799.173	748.055	603.078	0.695636	0.00418134
asnsd1	368827	ENSDARG00000000540	100.068	122.609	87.1761	167.728	97.7011	141.609	0.393556	0.602728
aspa	557232	ENSDARG00000005154	25.76	41.5289	21.794	12.8262	22.6982	32.6791	-0.38546	0.845458
aspg	100124594	ENSDARG00000052942	43.5939	70.2036	35.6629	37.4921	76.9767	66.3484	0.274703	0.856927
asph	323659	ENSDARG00000055945	3602.44	4241.88	3874.38	3319.03	3422.5	2980.73	-0.269447	0.212578
asphd2	569819	ENSDARG00000059629	357.668	236.319	214.968	239.752	181.586	218.851	-0.337556	0.584327
aspm	554173	ENSDARG00000103754	8082.7	7581.98	8138.08	5274.54	5607.45	6016.91	-0.494201	0.000379965
aspn	65228	ENSDARG00000002192	222.923	193.801	293.229	22.6926	67.1079	52.4846	-2.31897	5.4187e-07
aspscr1	550237	ENSDARG00000105321	139.699	153.261	162.464	192.393	164.809	212.909	0.324007	0.548027
asrgl1	541402	ENSDARG00000021681	6.93539	10.8766	7.9251	5.9198	12.8294	8.91248	0.103998	0.976979
ass1	447864		52.5108	37.5737	32.691	14.7995	39.4752	29.7083	-0.547868	0.707391
aste1	100006826	ENSDARG00000070132	13.8708	0	13.8689	5.9198	15.7901	9.90275	0.188648	0.96903
aste1b	100003699	ENSDARG00000062530	150.597	107.777	101.045	167.728	123.36	119.823	0.193195	0.843698
astn1	791157	ENSDARG00000068323	6.93539	28.6747	16.8408	9.86633	5.92128	40.6013	0.10422	0.976833
asun	334292	ENSDARG00000011764	314.074	299.601	288.275	343.348	322.71	279.258	0.067771	0.923229
asxl1	403066	ENSDARG00000115751	3603.43	3533.91	3625.73	3409.8	3366.25	3766.02	-0.029935	0.946614
asxl2	100150267	ENSDARG00000076501	134.745	157.216	155.53	182.527	241.786	159.434	0.383506	0.496616
atad1a	368672	ENSDARG00000023267	83.2247	82.069	61.4195	52.2915	46.3834	70.3095	-0.424053	0.648117
atad1b	368412	ENSDARG00000056609	147.625	197.757	261.528	238.765	219.087	264.403	0.251017	0.725035
atad2b	100331225	ENSDARG00000060537	2855.4	3227.39	2838.17	2842.49	3228.09	2641.06	-0.0342532	0.949753
atad3	403004	ENSDARG00000086848	154.56	154.25	175.343	281.19	195.402	150.522	0.373308	0.570579
atad5a	560591	ENSDARG00000070568	1322.68	1299.26	1339.34	1516.45	1567.17	1745.86	0.285894	0.173424
atad5b	321619	ENSDARG00000116936	301.194	388.592	389.32	346.308	425.345	515.933	0.254805	0.633228
atat1	406389	ENSDARG00000004472	123.846	120.631	109.961	88.797	120.399	91.1053	-0.239104	0.773131
ate1	101886126	ENSDARG00000103813	69.3539	57.3494	75.2884	72.0242	80.9242	78.2317	0.194739	0.860018
atf1	325609	ENSDARG00000109865	690.567	560.64	557.729	747.868	707.593	683.29	0.241639	0.483092
atf2	100006516	ENSDARG00000023903	129.791	170.071	157.511	129.249	122.373	140.619	-0.221662	0.760161
atf3	393939	ENSDARG00000007823	458.727	1201.37	805.388	572.247	1116.16	738.745	-0.0226107	0.989266
atf4a	406514	ENSDARG00000111939	1711.06	2370.11	2318.09	2533.67	2629.05	2637.1	0.285533	0.323045
atf4b	556410	ENSDARG00000114163	2199.51	2377.03	2650.94	2126.19	2504.7	2567.78	-0.00576527	0.993057
atf5a	566223	ENSDARG00000068096	50.5293	42.5177	83.2135	48.345	45.3965	49.5138	-0.299099	0.820438
atf5b	567253	ENSDARG00000077785	237.785	245.218	296.2	298.95	164.809	197.065	-0.237714	0.753709
atf6	558071	ENSDARG00000012656	592.481	625.899	702.362	842.585	773.714	676.358	0.255371	0.447129
atf6b	777612		229.859	372.771	472.534	404.519	308.894	379.275	0.0233207	0.984945
atf7a	566279	ENSDARG00000011298	344.788	334.209	368.517	378.867	342.447	252.52	-0.105183	0.889976
atf7b	567018	ENSDARG00000115171	395.317	316.41	402.199	378.867	370.08	358.48	-0.00842347	0.99276
atf7ip	558977	ENSDARG00000069619	2490.8	1918.24	2432.01	2803.02	2125.74	2512.33	0.1213	0.803809
atf7ip2	100005485	ENSDARG00000089698	93.1324	89.9792	79.251	125.302	118.426	121.804	0.478432	0.382653
atg101	567680	ENSDARG00000043287	58.4554	29.6635	81.2322	72.0242	49.344	16.8347	-0.293111	0.888737
atg12	570965	ENSDARG00000113990	2.97231	4.94391	10.897	0	3.94752	8.91248	-0.549113	0.915185
atg13	393405	ENSDARG00000036040	154.56	159.194	202.09	228.899	191.455	155.473	0.15874	0.851962
atg16l1	550552	ENSDARG00000099430	178.339	145.351	206.052	247.645	313.828	205.977	0.534824	0.239374
atg16l2	100034627	ENSDARG00000043238	10.8985	15.8205	13.8689	5.9198	22.6982	5.94165	-0.23187	0.94695
atg2b	100000277	ENSDARG00000097650	157.532	161.172	161.474	174.634	161.848	257.472	0.306734	0.63857
atg3	336632	ENSDARG00000009350	124.837	174.026	121.848	153.915	131.255	128.736	-0.0235398	0.985165
atg4a	554140	ENSDARG00000014531	25.76	39.5513	49.5318	63.1445	45.3965	39.611	0.367449	0.789819
atg4b	448859	ENSDARG00000052104	180.32	113.71	71.3259	96.69	112.504	97.047	-0.25462	0.82749
atg4c	415193	ENSDARG00000044373	138.708	194.79	164.446	179.567	197.376	257.472	0.349391	0.553892
atg4da	795933	ENSDARG00000043548	214.997	200.723	132.745	163.781	141.124	122.794	-0.358784	0.590296
atg4db	100329304	ENSDARG00000088145	24.7693	26.6971	26.7472	41.4386	40.4621	26.7374	0.474101	0.72518
atg5	494180	ENSDARG00000023396	140.689	77.125	112.933	86.8237	111.517	106.95	-0.115524	0.926136
atg7	100333016	ENSDARG00000102893	158.523	85.0353	101.045	48.345	75.0029	101.998	-0.612842	0.462571
atg9a	100009663	ENSDARG00000044551	176.357	182.925	177.324	157.861	190.468	153.493	-0.0966721	0.908154
atg9b	791223	ENSDARG00000055292	413.151	519.111	532.963	429.185	474.689	476.322	-0.0862588	0.892851
atic	140622	ENSDARG00000016706	108.985	75.1475	97.0824	253.565	190.468	231.724	1.26486	0.000163058
atl1	571909	ENSDARG00000060481	14.8616	38.5625	62.4101	10.853	55.2653	64.3679	0.171782	0.953621
atl2	323665	ENSDARG00000113487	206.08	273.893	236.762	288.097	283.235	305.995	0.291648	0.520866
atl3	449995	ENSDARG00000004270	770.819	739.609	737.034	639.338	656.275	531.778	-0.298492	0.295551
atm	403064	ENSDARG00000002385	1369.24	1428.79	1459.21	1470.08	1527.69	1680.5	0.136048	0.672475
atmin	571606	ENSDARG00000068601	159.514	120.631	111.942	160.821	111.517	129.726	0.0362707	0.975431
atn1	321707	ENSDARG00000092067	947.176	914.624	865.817	896.849	1011.55	1097.22	0.140014	0.720407
atoh1c	100498672	ENSDARG00000039602	0	13.843	8.91573	1.97327	9.8688	24.7569	0.685191	0.879075
atoh7	58216	ENSDARG00000069552	4.95385	2.96635	0	14.7995	23.6851	0	2.28073	0.515685
atoh8	561606	ENSDARG00000110248	689.576	438.031	355.639	235.805	251.654	369.373	-0.791696	0.0622256
atox1	558347	ENSDARG00000087693	10.8985	22.742	5.94382	20.7193	16.777	10.893	0.289733	0.921396
atp10a	567172	ENSDARG00000110280	1455.44	1612.7	1514.68	1194.81	1642.17	1333.9	-0.135886	0.758524
atp10b	563932	ENSDARG00000076230	28.7323	47.4616	25.7566	36.5054	28.6195	38.6207	0.0251014	0.992469
atp10d	571658	ENSDARG00000078887	647.964	489.447	478.478	657.098	609.892	545.642	0.165775	0.749689
atp11a	562925	ENSDARG00000115219	301.194	352.007	377.433	235.805	328.631	286.19	-0.27694	0.573808
atp11c	368385	ENSDARG00000116165	1408.88	1466.36	1390.85	1316.17	1418.15	1069.5	-0.165459	0.661061
atp13a1	334466	ENSDARG00000029931	587.527	777.183	724.156	792.266	903.982	735.774	0.219438	0.587026
atp13a2	568666	ENSDARG00000117108	337.853	253.128	225.865	230.872	236.851	226.773	-0.234086	0.69798
atp13a3	572029	ENSDARG00000076622	425.04	424.188	476.496	516.996	613.84	575.35	0.363994	0.191609
atp1a1a.1	64612	ENSDARG00000002791	5125.25	4846.02	5361.33	4293.83	5107.11	5531.68	-0.0381387	0.942636
atp1a1a.2	64613	ENSDARG00000007739	36.6585	81.0802	209.024	41.4386	65.1341	129.726	-0.467678	0.787118
atp1a1a.3	64614	ENSDARG00000039131	57.4647	72.1811	66.3727	53.2782	69.0816	109.921	0.244787	0.849068
atp1a1a.4	64615	ENSDARG00000001870	482.505	454.84	279.36	27.6257	85.8586	216.87	-1.88092	0.146676
atp1a1a.5	245703	ENSDARG00000040252	10.8985	5.9327	26.7472	4.93316	6.90816	16.8347	-0.60391	0.841262
atp1a1b	64616	ENSDARG00000115121	120.874	160.183	244.687	313.749	336.526	292.131	0.842001	0.0376642
atp1a2a	64609	ENSDARG00000111818	189.237	113.71	127.792	25.6525	82.8979	126.755	-0.872344	0.353311
atp1a3a	64610	ENSDARG00000018259	827.293	727.744	809.35	1208.63	1266.17	1019.98	0.563749	0.0048479
atp1a3b	64611	ENSDARG00000104139	49.5385	10.8766	35.6629	34.5322	39.4752	27.7277	0.0826359	0.974109
atp1b1a	64267	ENSDARG00000013144	2438.29	1643.36	1584.03	1372.41	1435.91	1470.56	-0.405014	0.191334
atp1b1b	64273	ENSDARG00000076833	36.6585	31.641	37.6442	21.7059	43.4227	38.6207	-0.0302163	0.99063
atp1b2a	64269	ENSDARG00000099203	523.127	624.911	683.539	679.79	781.609	782.317	0.292797	0.370526
atp1b3a	30468	ENSDARG00000015790	566.721	804.869	658.774	688.67	878.323	813.016	0.229217	0.604015
atp1b3b	64272	ENSDARG00000042837	145.643	180.947	115.905	91.7569	136.189	158.444	-0.195661	0.849215
atp1b4	100037383	ENSDARG00000053262	280.388	367.827	368.517	41.4386	76.9767	79.222	-2.36309	6.42768e-12
atp2a1	260440	ENSDARG00000020574	18634.4	15395.3	11536	3294.37	11113.3	12597.3	-0.754725	0.554972
atp2a1l	494489	ENSDARG00000035458	242.739	242.252	112.933	39.4653	181.586	215.88	-0.452588	0.74482
atp2a2a	393940	ENSDARG00000029439	299.213	514.167	386.348	345.322	425.345	383.236	-0.0562011	0.954438
atp2a2b	568265	ENSDARG00000005122	1805.18	1939.99	1800.98	2600.76	2469.17	2030.06	0.356338	0.103363
atp2a3	568671	ENSDARG00000060978	190.228	366.838	250.631	1123.77	819.111	513.953	1.60491	1.55804e-05
atp2b1a	378746	ENSDARG00000012684	507.274	545.808	693.446	558.434	499.361	580.301	-0.092473	0.887191
atp2b1b	561190	ENSDARG00000007788	4.95385	8.89904	16.8408	23.6792	28.6195	5.94165	0.924197	0.679884
atp2b2	557430	ENSDARG00000063433	33.6862	27.6859	31.7004	22.6926	52.3047	26.7374	0.12844	0.95465
atp2b3a	436745	ENSDARG00000043474	17.8339	42.5177	73.3071	78.9306	66.121	126.755	1.02399	0.282388
atp2b3b	558525	ENSDARG00000112865	22.7877	70.2036	60.4289	23.6792	52.3047	59.4165	-0.180338	0.931963
atp2b4	768304	ENSDARG00000044902	1252.33	1215.21	1238.3	800.159	1056.95	1001.17	-0.374662	0.124904
atp2c1	559574	ENSDARG00000060197	448.819	422.21	432.908	481.477	452.978	409.974	0.0441375	0.947345
atp5a1	553755	ENSDARG00000010149	4473.33	3060.28	3312.69	4818.72	4035.35	3804.64	0.222931	0.577392
atp5b	554135	ENSDARG00000070083	2786.05	2248.49	2163.55	3261.81	2501.74	2315.26	0.166535	0.719795
atp5c1	336957	ENSDARG00000045514	644.001	298.612	378.423	618.619	336.526	375.314	0.0102731	0.994804
atp5d	335709	ENSDARG00000019404	133.754	132.497	150.577	295.99	179.612	152.502	0.591591	0.284922
atp5e	798291	ENSDARG00000095897	71.3355	27.6859	34.6723	60.1846	33.5539	32.6791	-0.0806498	0.970385
atp5f1	449787	ENSDARG00000011553	633.102	435.064	424.983	797.199	473.703	419.877	0.179349	0.834151
atp5g1	406301	ENSDARG00000056008	191.219	179.958	103.026	311.776	197.376	97.047	0.354317	0.754362
atp5g3a	394151	ENSDARG00000017775	251.656	165.127	113.923	359.134	197.376	148.541	0.409848	0.672129
atp5g3b	81541	ENSDARG00000009447	353.705	163.149	188.221	411.426	265.471	211.919	0.334141	0.718056
atp5h	393675	ENSDARG00000098355	177.348	123.598	107.979	244.685	124.347	147.551	0.337191	0.710651
atp5ia	559659	ENSDARG00000078113	48.5477	39.5513	42.5974	83.8638	54.2784	57.436	0.581571	0.503956
atp5ib	767750	ENSDARG00000117205	72.3262	46.4728	42.5974	61.1712	41.449	63.3776	0.0405463	0.981793
atp5j	406599	ENSDARG00000014313	248.683	151.284	149.586	304.87	233.891	149.532	0.324806	0.709789
atp5j2	402883	ENSDARG00000037867	50.5293	36.585	31.7004	66.1044	38.4883	23.7666	0.111574	0.958726
atp5l	326977	ENSDARG00000011841	66.3816	140.407	99.0637	191.407	80.9242	61.3971	0.125861	0.946009
atp5o	335191	ENSDARG00000001788	237.785	220.499	200.109	322.629	231.917	225.783	0.245157	0.68562
atp5s	393187	ENSDARG00000012072	33.6862	6.92148	4.95318	11.8396	9.8688	11.8833	-0.439643	0.894259
atp6ap1a	100004566	ENSDARG00000041417	2.97231	4.94391	12.8783	12.8262	11.8426	29.7083	1.38674	0.47031
atp6ap1b	195824	ENSDARG00000037153	323.982	284.769	300.163	399.586	354.29	309.956	0.227083	0.632309
atp6ap1la	100000415	ENSDARG00000091509	6.93539	15.8205	4.95318	46.3717	45.3965	48.5235	2.33978	0.0047469
atp6ap1lb	561786	ENSDARG00000090963	6.93539	0	0	0	0	15.8444	1.19188	0.897876
atp6ap2	406296	ENSDARG00000008735	147.625	187.869	175.343	217.059	159.875	226.773	0.240956	0.72351
atp6v0a1a	324307	ENSDARG00000020847	390.364	476.593	438.852	361.108	359.224	276.287	-0.389808	0.27185
atp6v0a1b	553691	ENSDARG00000015174	1.98154	20.7644	27.7378	6.90643	22.6982	29.7083	0.232435	0.951124
atp6v0a2a	561469	ENSDARG00000035538	99.077	58.3382	105.998	52.2915	74.016	66.3484	-0.451279	0.623026
atp6v0a2b	561117	ENSDARG00000113695	266.517	318.388	242.706	283.164	264.484	329.762	0.0842611	0.912411
atp6v0b	321724	ENSDARG00000031681	206.08	215.555	193.174	273.297	228.956	203.997	0.200062	0.74546
atp6v0ca	192336	ENSDARG00000057853	1014.55	1023.39	915.349	1176.07	998.723	757.561	-0.0102504	0.991319
atp6v0cb	325402	ENSDARG00000036577	34.677	52.4055	43.588	28.6124	44.4096	55.4554	-0.0245176	0.99192
atp6v0d1	322811	ENSDARG00000115876	254.628	199.734	209.024	353.215	242.773	171.318	0.209992	0.812921
atp6v0e1	450017	ENSDARG00000101794	142.671	141.396	100.054	170.687	123.36	100.018	0.0369072	0.976648
atp6v1aa	394110	ENSDARG00000113437	376.493	310.478	321.957	385.773	283.235	269.355	-0.104576	0.893434
atp6v1ab	337583	ENSDARG00000112815	167.44	95.9119	126.802	281.19	114.478	125.765	0.418484	0.675109
atp6v1b2	359840	ENSDARG00000043465	21.7969	25.7083	61.4195	68.0777	25.6589	59.4165	0.49165	0.766281
atp6v1ba	359839	ENSDARG00000111525	652.918	489.447	571.598	800.159	558.574	466.42	0.0907054	0.912411
atp6v1c1a	368907	ENSDARG00000023967	390.364	291.691	259.547	283.164	317.775	218.851	-0.19983	0.776773
atp6v1c1b	449655	ENSDARG00000112507	33.6862	52.4055	59.4382	57.2247	36.5146	24.7569	-0.296397	0.855572
atp6v1d	393935	ENSDARG00000011175	159.514	121.62	120.858	179.567	118.426	60.4068	-0.16553	0.907031
atp6v1e1b	192335	ENSDARG00000030694	195.182	178.97	172.371	283.164	147.045	152.502	0.092532	0.937618
atp6v1f	436799	ENSDARG00000045543	72.3262	53.3943	33.6817	86.8237	58.2259	29.7083	0.132763	0.948365
atp6v1g1	335025	ENSDARG00000110951	102.049	79.1026	113.923	195.353	91.7799	84.1734	0.331585	0.764997
atp6v1h	286779	ENSDARG00000006370	142.671	139.418	169.399	160.821	136.189	120.814	-0.111752	0.905632
atp7a	564924	ENSDARG00000003699	828.284	729.722	748.922	700.509	782.596	794.201	-0.0186468	0.974709
atp7b	556499	ENSDARG00000058145	31.7046	4.94391	27.7378	0	1.97376	8.91248	-2.56479	0.225188
atp8a1	767630	ENSDARG00000063001	460.708	529.987	417.058	413.399	577.325	451.565	0.0349635	0.966284
atp8a2	100330943	ENSDARG00000110095	76.2893	127.553	134.727	82.8772	128.294	77.2415	-0.231293	0.842863
atp8b1	100148342	ENSDARG00000060980	344.788	671.383	363.564	125.302	286.195	287.18	-0.981722	0.0591399
atp8b2	323754	ENSDARG00000115821	80.2524	91.9568	87.1761	122.342	92.7667	83.1831	0.201661	0.843437
atp8b4	559291	ENSDARG00000079453	23.7785	27.6859	15.8502	242.712	133.229	118.833	2.87774	8.33661e-09
atp8b5a	100330945	ENSDARG00000062040	1405.9	1574.14	1404.72	1484.88	1580.98	1580.48	0.0835894	0.833894
atp8b5b	563450	ENSDARG00000104450	47.557	1.97757	10.897	0	3.94752	3.9611	-2.934	0.204895
atp9a	101886226	ENSDARG00000115869	305.157	332.231	378.423	253.565	296.064	252.52	-0.340679	0.380983
atp9b	568160	ENSDARG00000062521	414.142	586.348	581.504	522.915	526.007	497.118	-0.0331692	0.966327
atpaf1	550606	ENSDARG00000042799	63.4093	132.497	66.3727	55.2514	71.0554	60.4068	-0.490313	0.6193
atpaf2	560253	ENSDARG00000115757	47.557	57.3494	37.6442	35.5188	59.2128	81.2026	0.303465	0.833626
atpif1a	100037369	ENSDARG00000067975	65.3908	100.856	104.017	185.487	144.085	109.921	0.701491	0.227389
atpif1b	558368	ENSDARG00000112469	11.8892	20.7644	11.8876	27.6257	16.777	0	-0.00439369	0.999905
atpv0e2	553767	ENSDARG00000059057	0	2.96635	11.8876	0.986633	4.9344	0	-1.32664	0.833129
atr	567770	ENSDARG00000079625	576.628	558.662	511.169	690.643	592.128	684.28	0.256662	0.419619
atraid	553468	ENSDARG00000043388	53.5016	67.2372	39.6255	38.4787	22.6982	22.7763	-0.933653	0.295154
atrip	558534	ENSDARG00000063076	266.517	129.531	143.642	218.046	168.757	229.744	0.192087	0.854257
atrn	794975	ENSDARG00000110632	879.804	897.815	775.669	727.148	841.809	774.395	-0.123785	0.76996
atrnl1a	792417	ENSDARG00000077188	587.527	428.143	424.983	207.193	290.143	309.956	-0.835579	0.00767628
atrnl1b	569196	ENSDARG00000006420	2195.55	2429.44	2768.83	2738.89	3208.35	2931.21	0.26399	0.302046
atrx	323299	ENSDARG00000112921	5426.45	5436.33	4858.08	5807.32	5594.62	5010.79	0.0621378	0.882835
atxn10	100034473	ENSDARG00000008439	90.1601	117.665	69.3446	74.9841	107.57	136.658	0.203672	0.866707
atxn1a	557340	ENSDARG00000115198	534.025	461.761	413.096	198.313	229.943	182.211	-1.20654	5.21824e-07
atxn1b	565841	ENSDARG00000060862	231.84	140.407	278.369	294.017	259.55	427.799	0.592981	0.276935
atxn1l	793927	ENSDARG00000086977	813.422	908.691	1084.75	973.807	1011.55	1130.89	0.150849	0.732508
atxn2	569210	ENSDARG00000115860	338.843	387.603	356.629	281.19	284.222	307.976	-0.310461	0.382653
atxn2l	324525	ENSDARG00000112336	1705.12	1557.33	1496.85	1832.18	1649.08	1566.62	0.0849315	0.843422
atxn3	394079	ENSDARG00000099274	65.3908	99.867	99.0637	97.6767	92.7667	123.784	0.249463	0.799323
atxn7	100001490	ENSDARG00000074804	508.265	538.887	529	385.773	549.692	473.352	-0.161926	0.755474
atxn7l1	100536590	ENSDARG00000089860	111.957	126.564	163.455	101.623	130.268	161.415	-0.0314966	0.979461
atxn7l2a	692316	ENSDARG00000116622	299.213	324.321	360.592	312.763	321.723	234.695	-0.179153	0.766081
atxn7l2b	436928	ENSDARG00000056268	169.422	145.351	141.661	181.54	172.704	207.958	0.300668	0.590253
atxn7l3	368510	ENSDARG00000029331	104.031	235.33	229.828	147.008	197.376	202.016	-0.0589758	0.966284
auh	445182	ENSDARG00000042975	44.5847	47.4616	27.7378	76.9574	44.4096	47.5332	0.495745	0.672129
aunip	103909277		81.2432	86.0241	66.3727	76.9574	118.426	106.95	0.371822	0.653387
aup1	324654	ENSDARG00000092609	367.576	502.302	584.476	558.434	521.073	551.583	0.165455	0.779152
aurka	445246	ENSDARG00000012485	492.413	391.558	475.506	368.014	270.405	375.314	-0.423379	0.249688
aurkaip1	100126015	ENSDARG00000074985	49.5385	65.2597	51.5131	160.821	58.2259	57.436	0.733334	0.465104
aurkb	791894	ENSDARG00000037640	275.434	232.364	276.388	311.776	188.494	254.501	-0.0551472	0.956683
auts2a	368890	ENSDARG00000116439	2486.83	2708.28	2752.98	3356.53	3131.37	2899.53	0.240124	0.273005
auts2b	100150849	ENSDARG00000020946	154.56	172.048	258.556	295.003	282.248	358.48	0.677244	0.0895712
aven	692323	ENSDARG00000002894	53.5016	118.654	106.989	97.6767	91.7799	126.755	0.179824	0.893434
avil	678618	ENSDARG00000059342	0	0	5.94382	0	0	8.91248	0.584315	1
avl9	751682	ENSDARG00000055538	247.693	271.915	247.659	218.046	285.208	310.946	0.0856237	0.914515
avpr1aa	571591	ENSDARG00000077083	50.5293	66.2484	32.691	56.2381	83.8848	56.4457	0.395172	0.738465
avpr1ab	555939	ENSDARG00000045788	76.2893	75.1475	65.382	167.728	160.861	111.901	1.02265	0.0157084
avpr2aa	100007585	ENSDARG00000007436	6.93539	18.7869	5.94382	15.7861	9.8688	23.7666	0.641993	0.796245
avpr2ab	100151502	ENSDARG00000029219	9.9077	26.6971	46.5599	0	13.8163	6.93193	-2.003	0.304602
axdnd1	557839	ENSDARG00000062355	23.7785	8.89904	13.8689	13.8129	4.9344	8.91248	-0.750809	0.749248
axin1	57931	ENSDARG00000102964	1543.62	1823.32	1881.22	1738.45	1695.46	1948.86	0.0365313	0.948325
axin2	58080	ENSDARG00000100149	2711.74	2510.52	2635.09	2352.13	2315.22	2103.34	-0.214732	0.332583
axl	100330721	ENSDARG00000112045	1598.11	1457.47	1621.67	1450.35	1488.22	1464.62	-0.0871104	0.815366
azi2	406377	ENSDARG00000102419	130.782	94.9231	140.67	122.342	102.636	111.901	-0.121063	0.90856
azin1a	550230	ENSDARG00000052789	291.286	352.007	390.311	240.738	294.09	372.343	-0.188269	0.779472
azin1b	317764	ENSDARG00000115647	1062.11	800.914	891.573	1085.3	928.654	973.44	0.117056	0.813178
b2m	30400	ENSDARG00000053136	17.8339	32.6298	21.794	62.1579	52.3047	59.4165	1.26678	0.0722456
b2ml	791742	ENSDARG00000015887	177.348	184.902	150.577	197.327	188.494	160.425	0.0910933	0.915966
b3galnt2	553716	ENSDARG00000046133	51.5201	78.1138	44.5787	76.9574	76.9767	54.4651	0.258501	0.840789
b3galt1a	559521	ENSDARG00000079700	116.911	131.508	131.755	91.7569	73.0291	141.609	-0.311342	0.726738
b3galt2	404633	ENSDARG00000114032	333.89	179.958	161.474	175.621	245.733	237.666	-0.03525	0.977766
b3galt4	101886595	ENSDARG00000076218	2.97231	18.7869	12.8783	0.986633	14.8032	7.9222	-0.54678	0.892612
b3galt6	572324	ENSDARG00000038414	81.2432	76.1363	110.951	64.1311	89.8061	109.921	-0.0242888	0.989663
b3gat1a	548607	ENSDARG00000112270	0.99077	28.6747	11.8876	10.853	39.4752	37.6305	1.08174	0.644886
b3gat1b	100332644	ENSDARG00000113928	0	27.6859	12.8783	1.97327	11.8426	0.990275	-1.4539	0.707264
b3gat2	445060	ENSDARG00000030733	15.8523	9.88783	28.7285	3.94653	10.8557	29.7083	-0.291437	0.929429
b3gat3	192334	ENSDARG00000001939	357.668	229.398	181.287	185.487	214.153	178.25	-0.410957	0.511259
b3glcta	799443	ENSDARG00000073917	145.643	127.553	110.951	118.396	137.176	139.629	0.0409133	0.970329
b3glctb	564156	ENSDARG00000110421	0	0	0.990637	7.89306	10.8557	2.97083	4.35133	0.166612
b3gnt2b	793362	ENSDARG00000091902	433.957	364.861	370.498	806.079	633.577	462.459	0.701963	0.028936
b3gnt2l	797513	ENSDARG00000068219	108.985	228.409	137.699	287.11	223.035	172.308	0.522515	0.442335
b3gnt3	561172	ENSDARG00000058100	480.524	307.511	378.423	405.506	313.828	230.734	-0.295993	0.651483
b3gnt5a	336526	ENSDARG00000018971	179.329	262.027	285.303	140.102	173.691	115.862	-0.758073	0.0748989
b3gnt5b	791470	ENSDARG00000004396	36.6585	20.7644	14.8596	132.209	90.793	87.1442	2.10129	0.000231152
b3gnt7	286748	ENSDARG00000038489	212.025	180.947	173.361	62.1579	73.0291	96.0567	-1.29232	0.000346478
b3gnt7l	407623	ENSDARG00000053133	47.557	34.6074	42.5974	41.4386	64.1472	80.2123	0.574526	0.562191
b3gnt9	100034499	ENSDARG00000041616	250.665	237.308	224.875	350.255	296.064	228.754	0.295842	0.57613
b3gntl1	619261	ENSDARG00000043431	25.76	56.3606	44.5787	64.1311	45.3965	29.7083	0.136154	0.946592
b4galnt1a	558684	ENSDARG00000117038	0	66.2484	30.7097	12.8262	30.5933	19.8055	-0.616898	0.858291
b4galnt1b	793635	ENSDARG00000114582	5.94462	21.7532	32.691	13.8129	19.7376	31.6888	0.111363	0.971018
b4galnt3b	553524	ENSDARG00000058939	71.3355	101.845	108.97	32.5589	75.9898	53.4749	-0.800271	0.292899
b4galnt4a	565184	ENSDARG00000112006	26.7508	37.5737	97.0824	30.5856	39.4752	69.3193	-0.21173	0.921216
b4galnt4b	559305	ENSDARG00000076701	26.7508	73.1699	124.82	95.7034	106.583	141.609	0.613688	0.592792
b4galt1	550425		32.6954	65.2597	26.7472	4.93316	19.7376	15.8444	-1.62206	0.149155
b4galt1l	768123	ENSDARG00000104404	592.481	787.071	694.436	474.57	480.611	487.215	-0.523951	0.0296432
b4galt2	100148828	ENSDARG00000077994	57.4647	26.6971	76.279	43.4118	38.4883	14.8541	-0.729501	0.594281
b4galt3	561756	ENSDARG00000112697	107.003	75.1475	106.989	99.6499	128.294	73.2804	0.0591466	0.966831
b4galt4	492760	ENSDARG00000104042	180.32	141.396	147.605	140.102	160.861	141.609	-0.0846393	0.928367
b4galt5	724080	ENSDARG00000037815	603.379	585.359	468.571	314.736	305.933	204.987	-1.00519	0.000330174
b4galt6	393912	ENSDARG00000010301	577.619	590.303	557.729	485.423	585.22	542.671	-0.0971177	0.8507
b4galt7	445022	ENSDARG00000021899	177.348	103.822	105.998	137.142	119.413	108.93	-0.0831093	0.948325
b4gat1	101669768	ENSDARG00000111962	95.1139	82.069	149.586	80.9039	85.8586	136.658	-0.106991	0.941211
b9d1	554150	ENSDARG00000011727	32.6954	89.9792	67.3633	116.423	66.121	100.018	0.57223	0.575568
b9d2	436667	ENSDARG00000017385	10.8985	21.7532	16.8408	34.5322	17.7638	14.8541	0.440208	0.841386
babam1	445296	ENSDARG00000077526	241.748	197.757	173.361	169.701	205.271	203.006	-0.0845632	0.925059
babam2	550474	ENSDARG00000038863	87.1878	133.486	151.567	156.875	150.006	137.648	0.256042	0.758524
bace1	403005	ENSDARG00000101716	99.077	82.069	146.614	45.3851	69.0816	126.755	-0.44235	0.698577
bace2	449818	ENSDARG00000044781	321.01	341.13	377.433	297.963	323.697	300.053	-0.173595	0.724791
bach1a	678555	ENSDARG00000062553	64.4001	122.609	87.1761	73.0108	65.1341	92.0956	-0.252083	0.827253
bach1b	553688	ENSDARG00000002196	63.4093	55.3718	45.5693	27.6257	64.1472	42.5818	-0.290722	0.845458
bach2a	557210	ENSDARG00000036569	110.966	126.564	94.1105	112.476	110.531	122.794	0.0602847	0.958498
bach2b	555350	ENSDARG00000004074	1082.91	998.67	1061.96	1269.8	1261.23	1179.42	0.239209	0.310404
bada	564921	ENSDARG00000087993	34.677	50.4279	36.6536	61.1712	44.4096	42.5818	0.283159	0.840578
badb	58100	ENSDARG00000114609	64.4001	49.4391	102.036	73.0108	67.1079	87.1442	0.0741718	0.963945
bag1	558108	ENSDARG00000020895	92.1416	51.4167	40.6161	73.9975	61.1866	71.2998	0.164972	0.914038
bag2	393975	ENSDARG00000035005	123.846	101.845	63.4008	60.1846	67.1079	45.5527	-0.741999	0.297602
bag3	445139	ENSDARG00000039486	55.4831	124.587	100.054	129.249	109.544	104.969	0.295323	0.776556
bag4	100001980	ENSDARG00000043179	75.2985	88.9904	102.036	81.8905	94.7405	95.0664	0.0288002	0.982665
bag5	569580	ENSDARG00000017316	357.668	234.341	286.294	273.297	242.773	340.655	-0.0358985	0.97059
bag6	83910	ENSDARG00000075892	1143.35	1148.97	1006.49	1177.05	982.933	965.518	-0.0778474	0.881679
bag6l	751663	ENSDARG00000077531	634.093	578.438	580.513	625.525	530.942	635.757	-0.00066597	0.999905
bahcc1b	794333	ENSDARG00000080009	6467.75	7819.29	8910.78	5979	7452.92	8011.33	-0.113468	0.822265
bahd1	564712	ENSDARG00000112121	270.48	289.713	272.425	183.514	218.101	277.277	-0.294522	0.577184
baiap2a	678518	ENSDARG00000062799	345.779	411.334	329.882	197.327	223.035	253.51	-0.689838	0.0168284
baiap2b	100537012		1.98154	8.89904	19.8127	13.8129	6.90816	24.7569	0.567154	0.860018
baiap2l1a	387261	ENSDARG00000029305	13.8708	52.4055	23.7753	0	21.7114	16.8347	-1.22426	0.617322
baiap2l1b	550528	ENSDARG00000031119	1.98154	7.91026	16.8408	6.90643	19.7376	1.98055	0.0987919	0.984945
baiap3	564728	ENSDARG00000079264	14.8616	1.97757	1.98127	0	11.8426	3.9611	-0.251941	0.968457
bambia	83496	ENSDARG00000055381	425.04	415.289	376.442	1219.48	968.13	960.567	1.37146	4.79004e-13
bambib	431736	ENSDARG00000099677	137.717	214.566	165.436	370.974	365.146	272.326	0.961885	0.00360875
banf1	334717	ENSDARG00000037009	796.579	579.427	574.569	910.662	619.761	531.778	0.0803034	0.928037
banp	553659	ENSDARG00000017562	189.237	200.723	197.137	202.26	195.402	281.238	0.209557	0.753709
bap1	558885	ENSDARG00000063051	188.246	172.048	166.427	192.393	150.006	188.152	0.0104433	0.99276
bard1	100147913	ENSDARG00000076733	201.126	195.779	193.174	167.728	168.757	183.201	-0.183286	0.766998
barhl1a	550407	ENSDARG00000112355	1.98154	2.96635	12.8783	4.93316	10.8557	24.7569	1.1855	0.669884
barhl2	100001699	ENSDARG00000115723	4.95385	8.89904	7.9251	1.97327	4.9344	12.8736	-0.139034	0.974822
barx1	553644	ENSDARG00000007407	359.65	146.34	275.397	441.025	354.29	723.891	0.959211	0.0591957
barx2	100002200	ENSDARG00000041098	43.5939	5.9327	7.9251	13.8129	5.92128	17.825	-0.613208	0.839524
basp1	569631	ENSDARG00000110677	5.94462	8.89904	0.990637	21.7059	32.567	31.6888	2.44043	0.0459655
baxa	58081	ENSDARG00000020623	127.809	200.723	157.511	160.821	179.612	120.814	-0.0755317	0.948325
baxb	503609	ENSDARG00000030881	57.4647	65.2597	29.7191	83.8638	53.2915	54.4651	0.329976	0.808518
baz1a	334173	ENSDARG00000099745	1262.24	1379.35	1225.42	1457.26	1562.23	1477.49	0.217734	0.376478
baz1b	571727	ENSDARG00000114866	4260.31	3901.74	3779.28	4561.2	4374.84	4257.19	0.143837	0.583719
baz2a	450079	ENSDARG00000102974	4427.75	3841.42	4362.77	4577.98	4611.69	4961.28	0.163823	0.528142
baz2ba	561095	ENSDARG00000057782	6241.85	6587.27	7578.37	6052.99	6424.59	7028.97	-0.0651413	0.886213
bbc3	751763	ENSDARG00000069282	80.2524	58.3382	15.8502	36.5054	38.4883	48.5235	-0.322375	0.871248
bbip1	795943	ENSDARG00000116522	7.92616	2.96635	13.8689	14.7995	17.7638	7.9222	0.7095	0.792229
bbox1	572649	ENSDARG00000113482	65.3908	33.6186	43.588	53.2782	39.4752	23.7666	-0.291251	0.861813
bbs1	568986	ENSDARG00000114301	27.7416	55.3718	60.4289	56.2381	64.1472	35.6499	0.120435	0.950501
bbs10	100034535	ENSDARG00000110925	5.94462	47.4616	27.7378	55.2514	46.3834	38.6207	0.789444	0.624616
bbs12	570583	ENSDARG00000016112	52.5108	34.6074	40.6161	40.4519	34.5408	62.3873	0.104972	0.955834
bbs2	259187	ENSDARG00000110124	112.948	134.474	118.876	200.286	199.35	185.181	0.67496	0.0555368
bbs4	768303	ENSDARG00000063522	58.4554	59.327	24.7659	46.3717	31.5802	71.2998	0.0662064	0.974703
bbs5	393269	ENSDARG00000039827	24.7693	5.9327	4.95318	11.8396	12.8294	24.7569	0.471142	0.87755
bbs7	557491	ENSDARG00000059911	79.2616	56.3606	51.5131	96.69	84.8717	63.3776	0.388403	0.68562
bbs9	100333716	ENSDARG00000113486	221.933	176.992	211.006	147.008	236.851	234.695	0.0202451	0.987512
bbx	100005540	ENSDARG00000012699	538.979	543.83	557.729	447.931	466.794	533.758	-0.179644	0.654819
bc2	798901	ENSDARG00000053979	449.81	470.661	444.796	343.348	327.644	309.956	-0.476923	0.0533619
bcam	767689	ENSDARG00000090190	1000.68	1420.88	1052.06	933.355	1220.77	1057.61	-0.11309	0.851635
bcan	334113	ENSDARG00000099412	28.7323	54.383	54.485	5.9198	82.8979	55.4554	0.0682909	0.982105
bcap29	554151	ENSDARG00000016231	168.431	258.072	231.809	249.618	263.497	247.569	0.20851	0.749555
bcap31	368488	ENSDARG00000044972	409.188	248.184	255.584	280.204	294.09	248.559	-0.149887	0.85462
bcar1	568309	ENSDARG00000056525	1961.73	1888.57	1745.5	1234.28	1303.67	1175.46	-0.591598	0.000141422
bcar3	570610	ENSDARG00000016981	292.277	383.648	335.826	181.54	211.192	186.172	-0.805461	0.00387535
bcas2	493614	ENSDARG00000043631	113.939	65.2597	56.4663	147.008	78.9504	58.4262	0.271174	0.852564
bcas3	393594	ENSDARG00000114497	347.76	328.276	298.182	336.442	270.405	323.82	-0.0659866	0.928367
bcat1	337412	ENSDARG00000045568	6.93539	1.97757	0.990637	41.4386	29.6064	24.7569	3.27424	0.00432588
bcat2	436949	ENSDARG00000054849	351.723	338.164	323.938	384.787	315.802	363.431	0.0697125	0.916433
bccip	541348	ENSDARG00000004948	275.434	174.026	206.052	336.442	257.576	356.499	0.536095	0.215224
bckdha	554124	ENSDARG00000111762	357.668	284.769	306.107	401.56	324.684	408.984	0.259193	0.573487
bckdhb	569980	ENSDARG00000014676	315.065	221.487	183.268	301.91	207.245	194.094	-0.0335742	0.976648
bckdhbl	555648	ENSDARG00000093569	17.8339	4.94391	8.91573	34.5322	1.97376	5.94165	0.421637	0.915185
bckdk	282677	ENSDARG00000016904	500.339	347.063	413.096	410.439	376.001	343.625	-0.15756	0.792615
bcl10	100334750	ENSDARG00000077130	6.93539	30.6523	13.8689	89.7836	78.9504	37.6305	2.00367	0.0226478
bcl11aa	678650	ENSDARG00000061352	906.555	829.589	940.114	1064.58	961.221	796.181	0.0765082	0.894325
bcl11ab	566491	ENSDARG00000063153	1559.47	1736.3	1838.62	1489.82	1371.76	1665.64	-0.181577	0.576938
bcl11ba	100093707	ENSDARG00000062510	192.209	388.592	396.255	202.26	245.733	336.694	-0.316358	0.700485
bcl2a	570772	ENSDARG00000094704	262.554	293.668	287.285	280.204	251.654	345.606	0.0569049	0.945809
bcl2b	100007048	ENSDARG00000089109	2.97231	6.92148	17.8315	7.89306	0.98688	5.94165	-0.903524	0.801434
bcl2l1	114401	ENSDARG00000008434	531.053	431.109	373.47	387.747	416.463	395.12	-0.155289	0.782982
bcl2l10	373113	ENSDARG00000026766	127.809	143.373	148.596	194.367	215.14	197.065	0.53105	0.160215
bcl2l11	100190951	ENSDARG00000079144	22.7877	45.484	17.8315	20.7193	25.6589	26.7374	-0.235982	0.912411
bcl2l13	559355	ENSDARG00000111116	125.828	88.9904	73.3071	141.089	128.294	87.1442	0.307368	0.748636
bcl3	565656	ENSDARG00000087832	56.4739	81.0802	118.876	6.90643	7.89504	24.7569	-2.69689	0.000340762
bcl6a	393707	ENSDARG00000116260	93.1324	140.407	147.605	105.57	158.888	190.133	0.254182	0.791085
bcl6ab	100001936	ENSDARG00000069295	227.877	299.601	283.322	273.297	385.87	331.742	0.289394	0.5738
bcl6b	793278	ENSDARG00000114369	2356.05	1721.47	2182.37	867.25	889.179	900.16	-1.23656	2.40098e-12
bcl7a	57952	ENSDARG00000111533	430.985	464.728	469.562	521.929	459.886	478.303	0.096895	0.854158
bcl7ba	406444	ENSDARG00000111877	107.003	52.4055	80.2416	97.6767	45.3965	45.5527	-0.345326	0.801085
bcl7bb	81595	ENSDARG00000116093	52.5108	58.3382	52.5038	68.0777	64.1472	58.4262	0.222955	0.848298
bcl9	449616	ENSDARG00000036687	5377.9	4307.14	4759.02	4582.91	3889.3	4495.85	-0.155513	0.644886
bcl9l	449532	ENSDARG00000055054	342.807	419.244	400.217	416.359	385.87	405.023	0.0547751	0.935036
bco1	84039	ENSDARG00000104256	112.948	79.1026	71.3259	36.5054	61.1866	41.5916	-0.919065	0.162132
bco2a	793849	ENSDARG00000055722	0	9.88783	0	3.94653	9.8688	0	0.482492	0.956906
bco2b	678554	ENSDARG00000041715	19.8154	11.8654	3.96255	0	4.9344	7.9222	-1.47139	0.633699
bco2l	84041	ENSDARG00000027620	13.8708	0.988783	2.97191	6.90643	0.98688	0.990275	-1.0049	0.838624
bcor	402921	ENSDARG00000017798	4514.94	5013.13	5856.65	3566.68	4525.83	5113.78	-0.220275	0.561579
bcorl1	792710	ENSDARG00000077912	351.723	316.41	443.805	504.169	574.364	502.07	0.507414	0.0887527
bcr	568320	ENSDARG00000079286	699.484	811.79	748.922	980.713	973.064	928.878	0.350948	0.109841
bcs1l	394157	ENSDARG00000012295	12.88	35.5962	54.485	66.1044	57.2391	68.329	0.896525	0.400431
bdh1	100037356	ENSDARG00000059388	109.976	80.0914	75.2884	323.616	168.757	209.938	1.40421	0.000657233
bdh2	550507	ENSDARG00000052696	37.6493	28.6747	6.93446	52.2915	23.6851	20.7958	0.401643	0.867648
bdkrb2	100330960		0	8.89904	0.990637	5.9198	13.8163	8.91248	1.53417	0.664588
bdnf	58118	ENSDARG00000018817	11.8892	18.7869	9.90637	4.93316	5.92128	13.8639	-0.715555	0.775396
bean1	101885923	ENSDARG00000087413	52.5108	33.6186	37.6442	10.853	42.4359	22.7763	-0.702365	0.634351
becn1	393846	ENSDARG00000079128	248.683	148.317	139.68	163.781	132.242	131.707	-0.327336	0.673974
bend3	565716	ENSDARG00000076903	343.797	306.523	246.669	326.575	213.166	260.442	-0.164753	0.827531
bend4	566937	ENSDARG00000113607	30.7139	15.8205	11.8876	27.6257	20.7245	52.4846	0.787351	0.613062
bend5	566161	ENSDARG00000075624	342.807	357.939	313.041	303.883	296.064	372.343	-0.0603273	0.934987
best1	560608	ENSDARG00000078331	10.8985	3.95513	0	0	4.9344	0.990275	-1.32586	0.830636
best4	563711	ENSDARG00000078455	27.7416	2.96635	2.97191	1.97327	4.9344	0	-2.28517	0.469531
bet1	415135	ENSDARG00000113480	34.677	42.5177	35.6629	62.1579	36.5146	55.4554	0.44959	0.698436
bet1l	445493	ENSDARG00000032037	31.7046	15.8205	32.691	27.6257	12.8294	23.7666	-0.320804	0.884015
bfsp1	560018		0.99077	17.7981	7.9251	0	7.89504	13.8639	-0.296203	0.958726
bglapl	337724	ENSDARG00000104467	0	0	0	7.89306	0.98688	0	4.02272	1
bgnb	792197	ENSDARG00000110495	32.6954	15.8205	13.8689	1.97327	8.88192	12.8736	-1.39476	0.441295
bhlha15	777671	ENSDARG00000045166	14.8616	0	4.95318	10.853	5.92128	0	-0.240105	0.971273
bhlha9	323481	ENSDARG00000113055	20.8062	38.5625	22.7846	13.8129	33.5539	19.8055	-0.290478	0.894708
bhlhe22	393930	ENSDARG00000058039	0	1.97757	3.96255	6.90643	25.6589	20.7958	3.16717	0.0802841
bhlhe40	324413	ENSDARG00000004060	202.117	215.555	231.809	384.787	281.261	273.316	0.532417	0.145678
bhmt	322228	ENSDARG00000013430	1557.49	1027.35	1198.67	1311.24	886.218	888.277	-0.294101	0.535269
bicc1a	568201	ENSDARG00000061682	733.17	746.531	843.032	590.006	617.787	795.191	-0.213691	0.606779
bicc1b	571411	ENSDARG00000070497	2045.94	1985.48	2085.29	1981.16	1852.37	1784.48	-0.122691	0.685425
bicc2	402785	ENSDARG00000076557	1.98154	18.7869	43.588	0	8.88192	7.9222	-1.93738	0.462571
bicd1a	556758	ENSDARG00000113004	47.557	74.1587	68.3539	6.90643	22.6982	32.6791	-1.60979	0.0681834
bicd2	557383	ENSDARG00000075571	890.703	879.028	802.416	678.803	617.787	638.727	-0.410401	0.0500778
bicdl1	100537719	ENSDARG00000074761	0	10.8766	2.97191	0	6.90816	8.91248	0.191858	0.978127
bicra	386775	ENSDARG00000061159	1109.66	1087.66	1228.39	1166.2	1059.91	1335.88	0.0562712	0.916734
bicral	559084	ENSDARG00000016089	505.293	598.213	540.888	497.263	454.952	609.019	-0.0748968	0.909131
bida	559425	ENSDARG00000112031	69.3539	22.742	15.8502	63.1445	21.7114	23.7666	0.00909018	0.999905
bik	564030	ENSDARG00000045549	4.95385	4.94391	7.9251	7.89306	6.90816	2.97083	-0.00393211	0.999905
bin1b	447863	ENSDARG00000058820	270.48	274.882	191.193	244.685	186.52	190.133	-0.245407	0.712146
bin2a	492780	ENSDARG00000003219	23.7785	15.8205	6.93446	0.986633	26.6458	9.90275	-0.31	0.938359
bin2b	327387	ENSDARG00000010255	248.683	196.768	208.034	390.707	270.405	232.715	0.451876	0.360556
bin3	323976	ENSDARG00000099651	320.019	214.566	260.538	230.872	193.429	239.647	-0.260105	0.663887
birc2	373107	ENSDARG00000117094	593.471	527.021	602.307	1120.82	790.491	745.677	0.62505	0.0219979
birc5a	373110	ENSDARG00000075621	149.606	106.789	115.905	106.556	69.0816	79.222	-0.546723	0.388713
birc6	796547	ENSDARG00000115931	8144.13	9260.94	8442.21	7629.63	8912.52	8036.08	-0.0726316	0.852265
birc6-as2	101885944	ENSDARG00000097706	44.5847	85.0353	99.0637	46.3717	96.7143	96.0567	0.0644758	0.971273
birc7	100073331	ENSDARG00000109504	13.8708	0	9.90637	17.7594	16.777	5.94165	0.767748	0.834151
bivm	555455		40.6216	31.641	39.6255	27.6257	67.1079	49.5138	0.366497	0.804658
blcap	57918	ENSDARG00000052073	329.927	246.207	230.818	362.094	261.523	216.87	0.0587783	0.956683
blf	503516	ENSDARG00000043126	10.8985	31.641	15.8502	310.789	232.904	131.707	3.53181	7.08458e-11
blk	567764	ENSDARG00000007783	0	0	0.990637	2.9599	9.8688	3.9611	3.97987	1
blm	572540	ENSDARG00000077089	537.988	409.356	504.234	447.931	512.191	612.98	0.115981	0.856927
blmh	336541	ENSDARG00000025977	372.53	312.455	232.8	361.108	259.55	234.695	-0.101615	0.914006
blnk	405764	ENSDARG00000042722	1.98154	3.95513	3.96255	83.8638	62.1735	41.5916	4.24434	7.29903e-08
bloc1s1	556597	ENSDARG00000014171	2.97231	6.92148	8.91573	14.7995	12.8294	0.990275	0.605664	0.87964
bloc1s2	606665	ENSDARG00000046081	62.4185	25.7083	27.7378	42.4252	17.7638	21.7861	-0.4991	0.773831
bloc1s3	553529	ENSDARG00000068828	13.8708	19.7757	15.8502	24.6658	13.8163	18.8152	0.211115	0.931729
bloc1s4	445081	ENSDARG00000007597	38.64	29.6635	23.7753	39.4653	19.7376	14.8541	-0.314121	0.879597
bloc1s5	324781	ENSDARG00000111747	14.8616	1.97757	5.94382	7.89306	11.8426	0.990275	-0.136257	0.977813
bloc1s6	791215	ENSDARG00000042933	89.1693	48.4503	87.1761	65.1178	56.2522	58.4262	-0.322206	0.771768
blvra	767661	ENSDARG00000059857	54.4924	56.3606	56.4663	75.9707	34.5408	37.6305	-0.175566	0.915127
blvrb	436959	ENSDARG00000096829	13.8708	20.7644	12.8783	18.746	10.8557	6.93193	-0.379015	0.889377
blzf1	114452	ENSDARG00000011299	225.896	163.149	155.53	206.206	180.599	232.715	0.186012	0.809989
bmb	559540	ENSDARG00000096603	80.2524	91.9568	140.67	49.3316	50.3309	84.1734	-0.767266	0.281927
bmf1	571949	ENSDARG00000090234	67.3724	38.5625	31.7004	16.7728	24.672	54.4651	-0.521223	0.750501
bmf2	751764	ENSDARG00000116024	20.8062	8.89904	23.7753	7.89306	27.6326	18.8152	0.0230695	0.995007
bmi1a	321505	ENSDARG00000006010	253.637	140.407	206.052	170.687	146.058	144.58	-0.379374	0.554972
bmi1b	394249	ENSDARG00000013076	111.957	145.351	120.858	141.089	131.255	124.775	0.0705433	0.947387
bmp10	562533	ENSDARG00000061769	10.8985	0.988783	0.990637	15.7861	20.7245	5.94165	1.72118	0.503956
bmp16	100329171	ENSDARG00000103679	276.425	151.284	178.315	160.821	127.308	125.765	-0.550078	0.330202
bmp1a	572452	ENSDARG00000028071	3015.9	3284.74	2955.07	3650.54	4019.56	3510.53	0.272587	0.168945
bmp1b	559877	ENSDARG00000028053	16.8431	29.6635	34.6723	97.6767	77.9635	43.5721	1.43319	0.0521274
bmp2a	30631	ENSDARG00000013409	58.4554	41.5289	52.5038	37.4921	26.6458	33.6694	-0.640667	0.503956
bmp2b	30632	ENSDARG00000115191	451.791	485.492	381.395	387.747	385.87	421.857	-0.141529	0.787645
bmp2k	494101	ENSDARG00000115681	1343.48	1125.23	1034.22	1322.09	1124.06	997.207	-0.0247434	0.971273
bmp3	777717	ENSDARG00000109238	1549.56	1269.6	1364.11	1071.48	1124.06	1122.97	-0.334092	0.129734
bmp4	30612	ENSDARG00000019995	856.026	768.284	585.466	310.789	440.149	279.258	-1.10096	0.000101751
bmp5	394026	ENSDARG00000101701	285.342	219.51	324.929	469.637	359.224	608.029	0.792143	0.0242109
bmp6	503761	ENSDARG00000015686	537.988	452.862	419.039	280.204	307.907	308.966	-0.652284	0.00968647
bmp7b	557567	ENSDARG00000063230	291.286	308.5	363.564	346.308	283.235	232.715	-0.159909	0.81559
bmp8a	561963	ENSDARG00000035677	45.5754	15.8205	26.7472	10.853	9.8688	29.7083	-0.805714	0.653467
bmper	338246	ENSDARG00000101980	92.1416	107.777	73.3071	300.923	280.274	248.559	1.60257	6.63639e-08
bmpr1aa	58145	ENSDARG00000115025	2107.37	1751.13	1979.29	1770.02	1836.58	1947.87	-0.0717729	0.873498
bmpr1ab	447846	ENSDARG00000105045	1911.2	2061.61	2373.57	1871.64	2136.6	2830.21	0.107729	0.852564
bmpr1ba	30742	ENSDARG00000104100	426.031	617	892.564	363.081	479.624	651.601	-0.373318	0.572837
bmpr1bb	100149664	ENSDARG00000102742	560.776	744.553	753.875	345.322	393.765	470.381	-0.767742	0.00331427
bmpr2a	562822	ENSDARG00000011941	1704.12	1662.14	1700.92	1246.12	1454.66	1373.51	-0.314639	0.114574
bmpr2b	555655	ENSDARG00000020057	1633.78	1823.32	1660.31	1790.74	2164.23	2345.96	0.300145	0.242656
bms1	553241	ENSDARG00000054154	363.613	315.422	320.966	859.357	647.393	596.146	1.0724	5.60474e-06
bmt2	558558	ENSDARG00000109484	186.265	138.43	110.951	172.661	173.691	115.862	0.0854489	0.944307
bnc1	568786	ENSDARG00000100757	1316.73	1412.97	1560.25	1001.43	1067.8	1141.79	-0.417937	0.0356136
bnc2	559327	ENSDARG00000069989	2888.1	2885.27	2581.6	1147.45	1272.09	1225.96	-1.19652	4.68501e-18
bnip1a	565822	ENSDARG00000114927	6.93539	2.96635	13.8689	4.93316	28.6195	19.8055	1.1666	0.610614
bnip1b	795732	ENSDARG00000104280	33.6862	21.7532	14.8596	26.6391	25.6589	26.7374	0.169008	0.941089
bnip2	394197	ENSDARG00000013397	800.542	841.454	746.94	698.536	776.675	711.018	-0.127925	0.749051
bnip3	336116	ENSDARG00000099961	37.6493	48.4503	40.6161	40.4519	21.7114	20.7958	-0.611059	0.618326
bnip3la	323563	ENSDARG00000025468	175.366	125.575	105.008	195.353	173.691	184.191	0.446606	0.427784
bnip3lb	554650	ENSDARG00000028067	50.5293	47.4616	84.2041	51.3049	48.3571	82.1928	-0.00274308	0.999905
bnip4	568155	ENSDARG00000117207	68.3632	76.1363	88.1667	83.8638	86.8455	87.1442	0.148288	0.894583
bnipl	100149386	ENSDARG00000060435	131.772	161.172	119.867	218.046	188.494	155.473	0.445132	0.395724
boc	334628	ENSDARG00000074335	5591.91	7503.87	8390.69	5036.76	5647.92	5682.2	-0.392651	0.133877
bod1	767743	ENSDARG00000103922	155.551	118.654	112.933	136.155	117.439	129.726	-0.0142868	0.99192
bod1l1	100332682	ENSDARG00000089505	547.896	575.471	534.944	553.501	628.643	661.504	0.152833	0.718049
boka	445218	ENSDARG00000052129	43.5939	74.1587	47.5506	61.1712	54.2784	25.7472	-0.227347	0.894499
bokb	394160	ENSDARG00000008807	17.8339	4.94391	0	6.90643	2.96064	15.8444	0.174706	0.974608
bola1	445163	ENSDARG00000039915	46.5662	14.8317	32.691	25.6525	41.449	31.6888	0.0704097	0.975679
bola3	445131	ENSDARG00000098130	15.8523	21.7532	31.7004	35.5188	33.5539	35.6499	0.595525	0.656096
bop1	777627	ENSDARG00000063627	216.979	184.902	257.566	643.285	390.805	455.527	1.17563	0.000106977
bora	555606	ENSDARG00000112916	167.44	177.981	181.287	99.6499	157.901	118.833	-0.484791	0.352447
borcs5	449650	ENSDARG00000077830	2.97231	18.7869	11.8876	21.7059	3.94752	15.8444	0.302471	0.93497
borcs7	664759	ENSDARG00000055070	4.95385	2.96635	11.8876	8.8797	15.7901	17.825	1.10126	0.622882
borcs8	558180	ENSDARG00000071339	25.76	21.7532	37.6442	25.6525	15.7901	15.8444	-0.571838	0.720894
bpgm	436903	ENSDARG00000070826	32.6954	44.4952	35.6629	39.4653	72.0423	35.6499	0.382934	0.783678
bphl	402804	ENSDARG00000102877	17.8339	60.3157	36.6536	46.3717	23.6851	58.4262	0.162311	0.944345
bpifcl	100003132	ENSDARG00000099980	3.96308	0	0.990637	10.853	11.8426	10.893	2.76177	0.228031
bpnt1	436627	ENSDARG00000043684	18.8246	34.6074	43.588	38.4787	18.7507	37.6305	-0.0325313	0.991207
bptf	324479	ENSDARG00000077361	4702.2	4657.17	4835.3	5085.11	4937.36	5334.61	0.113554	0.668812
braf	403065	ENSDARG00000017661	752.985	660.507	755.856	766.614	827.993	840.744	0.166869	0.642769
brap	436739	ENSDARG00000008560	119.883	133.486	151.567	165.754	106.583	150.522	0.0624729	0.95754
brat1	678547	ENSDARG00000062585	127.809	101.845	83.2135	114.449	66.121	72.2901	-0.307173	0.759958
brca2	566758	ENSDARG00000079015	840.173	1061.95	954.974	1023.14	1213.86	1230.91	0.279505	0.352663
brcc3	100333845	ENSDARG00000098242	82.2339	101.845	135.717	98.6633	126.321	110.911	0.070862	0.956602
brd1a	569574	ENSDARG00000116694	676.696	749.497	733.071	612.699	833.914	799.152	0.0566567	0.930447
brd1b	100009661	ENSDARG00000051798	1761.59	1809.47	1791.07	1894.34	2174.1	2081.56	0.197775	0.417076
brd2a	30445	ENSDARG00000022280	1359.34	2046.78	1981.27	1564.8	2397.13	2239.01	0.202897	0.716402
brd2b	569354	ENSDARG00000046087	63.4093	72.1811	75.2884	44.3985	52.3047	71.2998	-0.328008	0.753945
brd3a	327372	ENSDARG00000006527	1703.13	1400.12	1653.37	1720.69	1440.85	1852.8	0.0761196	0.889164
brd3b	327108	ENSDARG00000100129	3186.32	2850.66	3119.52	3034.88	2934.98	3231.27	0.00701553	0.990754
brd4	570531	ENSDARG00000078904	3303.23	2792.32	3123.48	3245.04	3043.54	3263.95	0.0512683	0.907031
brd7	406675	ENSDARG00000008380	637.065	544.819	624.101	885.996	521.073	697.154	0.220507	0.689001
brd8	337414	ENSDARG00000025071	1038.33	990.76	908.414	972.82	1061.88	866.491	-0.0179327	0.975679
brd9	393245	ENSDARG00000017143	300.203	493.403	508.197	442.998	431.267	478.303	0.0551766	0.954096
brdt	333996	ENSDARG00000102802	472.597	514.167	650.848	487.397	656.275	717.949	0.184954	0.750876
brf1a	334402	ENSDARG00000017835	45.5754	56.3606	26.7472	86.8237	93.7536	65.3582	0.934442	0.184628
brf1b	334316	ENSDARG00000115325	524.117	410.345	410.124	353.215	418.437	444.634	-0.144688	0.805872
brf2	445142	ENSDARG00000002060	32.6954	26.6971	41.6068	26.6391	25.6589	30.6985	-0.283227	0.866816
bri3	100002236	ENSDARG00000086332	363.613	219.51	177.324	227.912	222.048	196.074	-0.235215	0.780718
bri3bp	327046	ENSDARG00000010108	114.929	153.261	151.567	147.008	141.124	165.376	0.111537	0.905632
brinp1	100334375	ENSDARG00000078302	21.7969	4.94391	2.97191	0	4.9344	6.93193	-1.32439	0.721106
brinp2	561009	ENSDARG00000014302	3.96308	3.95513	6.93446	0	5.92128	11.8833	0.261351	0.964601
brinp3a.1	569746	ENSDARG00000076351	0	22.742	5.94382	6.90643	31.5802	2.97083	0.531261	0.91076
brinp3a.2	100001603	ENSDARG00000061051	2.97231	17.7981	14.8596	9.86633	23.6851	13.8639	0.412211	0.894325
brinp3b	100330048	ENSDARG00000075352	57.4647	42.5177	30.7097	29.599	28.6195	26.7374	-0.62136	0.584673
brip1	794038	ENSDARG00000113993	499.348	528.01	529	540.675	566.469	601.097	0.134326	0.750876
brk1	415187	ENSDARG00000041974	135.736	156.228	90.148	146.022	98.688	68.329	-0.287611	0.792555
brms1	791681	ENSDARG00000051955	116.911	78.1138	67.3633	71.0376	37.5014	53.4749	-0.695566	0.389191
brms1la	792017	ENSDARG00000006235	343.797	344.096	360.592	443.985	300.998	479.293	0.223605	0.698577
brms1lb	562889	ENSDARG00000018047	79.2616	41.5289	52.5038	38.4787	50.3309	17.825	-0.700415	0.549755
brox	492786	ENSDARG00000013659	247.693	214.566	137.699	217.059	185.533	220.831	0.0553429	0.960976
brpf1	393991		285.342	289.713	355.639	348.281	312.841	381.256	0.163491	0.773273
brpf3a	100149254	ENSDARG00000110187	440.893	432.098	373.47	368.014	350.342	356.499	-0.213697	0.603161
brpf3b	100003354	ENSDARG00000074238	774.782	995.704	871.761	760.694	976.025	921.946	0.00892611	0.99192
brsk2a	100334759	ENSDARG00000061421	24.7693	12.8542	31.7004	12.8262	21.7114	24.7569	-0.225468	0.927356
brsk2b	100149571	ENSDARG00000077791	24.7693	81.0802	122.839	72.0242	123.36	111.901	0.426181	0.770494
brwd1	798858	ENSDARG00000111353	1665.48	1863.86	2011.98	1596.37	1968.83	1962.73	-0.00349731	0.996158
brwd3	553209	ENSDARG00000109876	1481.2	1346.72	1394.82	1474.03	1284.92	1514.13	0.0170935	0.974703
bscl2	567403	ENSDARG00000037008	251.656	141.396	172.371	190.42	133.229	156.463	-0.235932	0.785904
bsdc1	794882	ENSDARG00000116408	312.093	274.882	275.397	362.094	229.943	295.102	0.0408583	0.96587
bsg	337692	ENSDARG00000019881	2025.13	2126.87	2303.23	2135.07	2265.88	2394.49	0.0740927	0.853531
bsk146	405767	ENSDARG00000099069	23.7785	39.5513	56.4663	15.7861	41.449	88.1345	0.27905	0.903414
bsna	100004063		13.8708	40.5401	111.942	17.7594	68.0947	76.2512	-0.03734	0.99192
bsnb	101175706	ENSDARG00000079161	68.3632	88.0016	133.736	30.5856	92.7667	96.0567	-0.402972	0.76403
bspry	559377	ENSDARG00000104875	1.98154	22.742	15.8502	5.9198	17.7638	9.90275	-0.272718	0.944345
btaf1	565357	ENSDARG00000060089	1283.05	1355.62	1359.15	1398.06	1492.16	1576.52	0.160001	0.583281
btbd10a	560466	ENSDARG00000062674	463.681	426.165	448.759	637.365	436.201	451.565	0.188221	0.729892
btbd10b	557247	ENSDARG00000115689	757.939	517.133	591.41	639.338	559.561	539.7	-0.10238	0.877491
btbd11a	562893	ENSDARG00000063255	292.277	382.659	287.285	230.872	318.762	317.878	-0.149513	0.839278
btbd11b	100034519	ENSDARG00000063040	25.76	50.4279	82.2229	309.803	220.074	127.745	2.05361	0.000291637
btbd17a	563263	ENSDARG00000099321	0	18.7869	2.97191	1.97327	5.92128	4.95138	-0.760447	0.886351
btbd17b	563672	ENSDARG00000112615	16.8431	11.8654	6.93446	6.90643	14.8032	27.7277	0.47185	0.864961
btbd2a	565970	ENSDARG00000116244	190.228	256.095	202.09	171.674	290.143	252.52	0.139669	0.880767
btbd3a	563691	ENSDARG00000005544	371.539	425.177	406.161	360.121	313.828	405.023	-0.156858	0.767779
btbd3b	562593	ENSDARG00000087517	0	15.8205	21.794	13.8129	6.90816	3.9611	-0.607745	0.889405
btbd6a	100141360	ENSDARG00000076440	158.523	155.239	155.53	140.102	190.468	189.143	0.147207	0.856012
btbd6b	553533	ENSDARG00000114044	298.222	316.41	311.06	250.605	286.195	251.53	-0.231727	0.60462
btbd7	568372	ENSDARG00000003069	1068.05	1003.61	1217.49	981.7	1044.12	1138.82	-0.0556825	0.916734
btbd9	557659	ENSDARG00000068983	84.2155	158.205	140.67	118.396	123.36	138.639	-0.0102312	0.994963
btc	503869	ENSDARG00000110368	11.8892	20.7644	26.7472	0	7.89504	5.94165	-2.10213	0.2642
btd	555376	ENSDARG00000099596	15.8523	0	10.897	2.9599	2.96064	5.94165	-1.17319	0.766281
btf3	556625	ENSDARG00000116462	1452.47	972.962	944.077	1659.52	954.313	1226.95	0.188867	0.780469
btf3l4	393667	ENSDARG00000089681	111.957	88.9904	75.2884	202.26	92.7667	90.115	0.479529	0.609722
btg1	114432	ENSDARG00000027249	855.035	876.061	1096.64	709.389	931.615	1021.96	-0.0866187	0.897146
btg2	30079	ENSDARG00000020298	2205.45	2618.3	2579.62	2087.72	2627.08	2685.63	-0.000580705	0.999905
btg3	492479	ENSDARG00000115730	184.283	137.441	182.277	194.367	185.533	261.433	0.347631	0.551505
btk	568653	ENSDARG00000113249	68.3632	43.5064	42.5974	578.167	317.775	182.211	2.80324	7.76003e-09
btr01	563047	ENSDARG00000051965	33.6862	64.2709	21.794	0	16.777	28.718	-1.39642	0.503956
btr04	565512	ENSDARG00000060962	107.003	103.822	82.2229	97.6767	87.8323	88.1345	-0.0988377	0.930969
btr06	100151764	ENSDARG00000105558	2.97231	0	0	0	31.5802	25.7472	4.26991	0.150178
btr07	793570	ENSDARG00000105558	0	18.7869	24.7659	18.746	11.8426	26.7374	0.396359	0.917255
btr12	767681	ENSDARG00000051809	41.6124	133.486	39.6255	35.5188	61.1866	51.4943	-0.534995	0.715227
btr18	571162	ENSDARG00000103618	9.9077	0.988783	6.93446	2.9599	3.94752	11.8833	0.0755434	0.99063
btr23	100334710	ENSDARG00000099509	5.94462	34.6074	9.90637	15.7861	4.9344	16.8347	-0.426237	0.894993
btr26	100149795	ENSDARG00000105241	13.8708	11.8654	7.9251	17.7594	20.7245	0	0.193297	0.967313
btr30	393394	ENSDARG00000102591	0	135.463	106.989	29.599	31.5802	70.3095	-0.882763	0.879075
bub1	100307076	ENSDARG00000077029	1138.4	1043.17	1142.2	786.346	889.179	902.141	-0.366757	0.0842094
bub1ba	567931	ENSDARG00000078825	318.037	332.231	312.051	256.525	274.353	253.51	-0.294945	0.43045
bub1bb	567006	ENSDARG00000074927	791.625	699.069	737.034	592.966	560.548	518.904	-0.413621	0.0694244
bub3	403012	ENSDARG00000075883	322.991	264.005	325.92	354.201	273.366	297.083	0.0184451	0.984363
bud23	572367	ENSDARG00000063596	17.8339	21.7532	29.7191	41.4386	52.3047	47.5332	1.02747	0.223442
bud31	445383	ENSDARG00000017084	81.2432	45.484	69.3446	70.0509	54.2784	60.4068	-0.0858707	0.957275
bves	415107	ENSDARG00000058548	28.7323	23.7308	10.897	1.97327	14.8032	5.94165	-1.47968	0.419228
bxdc2	402823	ENSDARG00000098935	118.892	88.9904	83.2135	229.885	138.163	167.357	0.879157	0.0553623
bysl	394081	ENSDARG00000001057	129.791	80.0914	101.045	302.896	209.219	225.783	1.24689	0.000584937
bzw1a	325226	ENSDARG00000010481	1052.2	966.041	977.759	1299.4	1013.53	934.82	0.116413	0.820391
bzw1b	406812	ENSDARG00000099148	796.579	758.396	712.268	812.986	766.806	717.949	0.0192859	0.974109
bzw2	393892	ENSDARG00000035918	7.92616	23.7308	10.897	12.8262	25.6589	15.8444	0.352367	0.895174
c10h21orf59	792532	ENSDARG00000111366	43.5939	58.3382	50.5225	86.8237	69.0816	70.3095	0.569306	0.450081
c13h10orf11	553730	ENSDARG00000057166	147.625	126.564	109.961	137.142	86.8455	137.648	-0.0871535	0.94266
c13h10orf71	101884346		295.25	347.063	182.277	152.928	278.3	263.413	-0.247433	0.787125
c15h3orf80	101887089		19.8154	10.8766	30.7097	22.6926	9.8688	6.93193	-0.636491	0.778618
c17h14orf159	560387	ENSDARG00000005179	33.6862	32.6298	41.6068	27.6257	59.2128	36.6402	0.194294	0.913051
c17h15orf52	796966		0.99077	7.91026	14.8596	6.90643	17.7638	20.7958	0.936153	0.737318
c18h15orf65	103909108		12.88	0	0	0	0	0	-4.56222	1
c18h3orf33	565816	ENSDARG00000040582	2.97231	35.5962	16.8408	24.6658	2.96064	7.9222	-0.640322	0.849215
c19h1orf109	286778	ENSDARG00000012113	8.91693	11.8654	6.93446	13.8129	12.8294	12.8736	0.511625	0.840945
c19h1orf216	101883800		68.3632	45.484	42.5974	49.3316	44.4096	27.7277	-0.364965	0.784457
c1d	474329	ENSDARG00000021112	102.049	51.4167	61.4195	124.316	74.016	121.804	0.575131	0.497377
c1galt1b	337131	ENSDARG00000113870	271.471	352.007	238.744	318.682	301.985	205.977	-0.0607726	0.954438
c1galt1c1	324052	ENSDARG00000036335	138.708	242.252	175.343	230.872	259.55	201.026	0.31374	0.638492
c1qbp	334619	ENSDARG00000039887	140.689	91.9568	87.1761	310.789	208.232	210.929	1.19056	0.00242314
c1ql1	556064	ENSDARG00000028521	0	5.9327	10.897	0	2.96064	8.91248	-0.503544	0.941839
c1ql3a	100151368	ENSDARG00000010350	34.677	25.7083	23.7753	65.1178	32.567	39.611	0.706118	0.528142
c1ql3b	403002	ENSDARG00000036483	0.99077	5.9327	3.96255	2.9599	5.92128	10.893	0.860864	0.827627
c1qtnf1	550573	ENSDARG00000088878	59.4462	26.6971	34.6723	60.1846	53.2915	82.1928	0.695615	0.475796
c1qtnf12	790933	ENSDARG00000070681	184.283	228.409	140.67	405.506	329.618	352.538	0.974912	0.00165109
c1qtnf2	572041	ENSDARG00000059944	0	2.96635	3.96255	11.8396	14.8032	2.97083	2.09557	0.465316
c1qtnf4	550397	ENSDARG00000024299	0.99077	3.95513	15.8502	0.986633	2.96064	2.97083	-1.58796	0.668322
c1qtnf5	555815	ENSDARG00000056134	102.049	84.0465	30.7097	175.621	148.032	68.329	0.854411	0.362987
c1qtnf6a	565113	ENSDARG00000055175	663.816	413.311	371.489	79.9173	151.98	77.2415	-2.2283	7.40132e-09
c1qtnf6b	570839	ENSDARG00000006544	0	9.88783	27.7378	19.7327	3.94752	14.8541	0.0344249	0.995172
c1qtnf9	799425	ENSDARG00000112904	16.8431	31.641	2.97191	5.9198	3.94752	3.9611	-1.8957	0.338126
c1s	793529	ENSDARG00000100599	10.8985	8.89904	13.8689	24.6658	14.8032	16.8347	0.74199	0.68562
c23h20orf24	334006	ENSDARG00000074790	663.816	516.145	496.309	575.207	684.895	689.232	0.217725	0.622636
c24h7orf50	567594	ENSDARG00000045254	0	4.94391	13.8689	7.89306	28.6195	6.93193	1.20752	0.714544
c25h12orf75	100535414	ENSDARG00000100152	0	0.988783	7.9251	12.8262	10.8557	1.98055	1.52573	0.702898
c2cd2	100332559	ENSDARG00000105000	1282.06	1133.14	1142.2	913.622	1029.32	1080.39	-0.234694	0.408259
c2cd2l	566488	ENSDARG00000061066	8.91693	45.484	49.5318	112.476	124.347	90.115	1.65334	0.0333432
c2cd3	797081	ENSDARG00000074137	692.548	538.887	575.56	533.768	589.167	670.416	-0.0109409	0.99063
c2cd5	393585	ENSDARG00000094590	525.108	543.83	452.721	530.809	595.089	485.235	0.0824366	0.893434
c2h1orf27	393588	ENSDARG00000042671	37.6493	61.3045	46.5599	59.198	46.3834	53.4749	0.128343	0.934987
c3a.1	321046	ENSDARG00000012694	0	10.8766	47.5506	7.89306	3.94752	7.9222	-1.56387	0.601883
c3ar1	794255	ENSDARG00000031749	0.99077	3.95513	7.9251	13.8129	5.92128	9.90275	1.20328	0.675065
c4	566261	ENSDARG00000015065	117.902	93.9343	75.2884	52.2915	63.1603	54.4651	-0.756832	0.207215
c5ar1	100000959	ENSDARG00000040319	1.98154	9.88783	19.8127	445.958	363.172	147.551	4.91631	2.12564e-13
c6	393611	ENSDARG00000115290	90.1601	199.734	138.689	78.9306	104.609	154.483	-0.342529	0.74482
c6ast1	751088	ENSDARG00000069216	0	0.988783	0	20.7193	0.98688	0	4.35043	0.367616
c6h1orf226	108179105		309.12	221.487	230.818	136.155	168.757	146.561	-0.75405	0.0318593
c7a	562475	ENSDARG00000042172	134.745	224.454	179.305	99.6499	161.848	92.0956	-0.606845	0.322563
c7b	570832	ENSDARG00000114734	4.95385	1.97757	12.8783	6.90643	3.94752	8.91248	-0.00314697	0.999905
ca10a	641327	ENSDARG00000052644	17.8339	2.96635	2.97191	0	5.92128	0	-2.00494	0.651483
ca10b	568543	ENSDARG00000009568	20.8062	8.89904	12.8783	2.9599	5.92128	3.9611	-1.72932	0.334435
ca15b	791844	ENSDARG00000040510	0	0	0	8.8797	2.96064	6.93193	5.10263	1
ca16b	569183	ENSDARG00000110045	241.748	267.96	319.976	403.533	340.474	322.83	0.362722	0.367877
ca16c	497461	ENSDARG00000051814	131.772	188.857	222.893	49.3316	105.596	150.522	-0.831475	0.237664
ca2	387526	ENSDARG00000014488	152.579	144.362	127.792	156.875	139.15	186.172	0.183031	0.815393
ca4a	555196	ENSDARG00000043589	44.5847	57.3494	81.2322	16.7728	43.4227	40.6013	-0.861759	0.392144
ca4c	407683	ENSDARG00000044512	1.98154	3.95513	4.95318	3.94653	6.90816	12.8736	1.12345	0.718182
ca5a	569989	ENSDARG00000111390	367.576	356.951	252.612	187.46	227.969	228.754	-0.601111	0.0952667
ca6	100006448	ENSDARG00000110050	4086.93	3672.34	3465.25	6482.18	6849.94	5544.55	0.749954	2.31184e-06
ca8	550233	ENSDARG00000039098	9.9077	26.6971	12.8783	37.4921	23.6851	22.7763	0.762591	0.635933
ca9	566612	ENSDARG00000102300	0.99077	3.95513	7.9251	0	0.98688	8.91248	-0.379093	0.957275
caap1	100329847	ENSDARG00000079652	43.5939	64.2709	50.5225	62.1579	75.9898	37.6305	0.150344	0.926135
cab39	415235	ENSDARG00000043451	197.163	189.846	177.324	188.447	178.625	175.279	-0.0573139	0.948325
cab39l	492361	ENSDARG00000036658	522.136	480.548	489.375	536.728	464.821	477.313	-0.0128077	0.986454
cab39l1	406822	ENSDARG00000112995	363.613	337.175	335.826	445.958	467.781	447.604	0.393159	0.140577
cabin1	571383	ENSDARG00000079326	2183.66	2429.44	2489.47	1987.08	2398.12	2775.74	0.0118012	0.98745
cables1	100126070	ENSDARG00000099395	47.557	146.34	101.045	153.915	237.838	191.123	0.98272	0.11279
cables2a	100148748	ENSDARG00000076964	116.911	154.25	115.905	118.396	150.006	151.512	0.117474	0.906705
cables2b	564291	ENSDARG00000017154	4.95385	25.7083	29.7191	125.302	90.793	56.4457	2.17428	0.00811775
cabp1b	436687	ENSDARG00000033411	45.5754	60.3157	8.91573	21.7059	19.7376	11.8833	-1.10623	0.474412
cabp7b	556082	ENSDARG00000060846	0.99077	7.91026	26.7472	4.93316	19.7376	14.8541	0.148932	0.973134
cabz01076234.2	100332077	ENSDARG00000067794	2.97231	8.89904	1.98127	3.94653	19.7376	9.90275	1.27757	0.64543
cabz01093075.1	100329767	ENSDARG00000086616	12.88	1.97757	4.95318	0	5.92128	0.990275	-1.51897	0.725035
cachd1	794807	ENSDARG00000113216	3761.95	4021.38	4588.63	3650.54	4462.67	4516.65	0.0297623	0.958929
cacna1aa	562059	ENSDARG00000037905	123.846	122.609	105.008	58.2113	53.2915	74.2706	-0.919897	0.0488866
cacna1ab	569528	ENSDARG00000006923	34.677	33.6186	44.5787	22.6926	67.1079	49.5138	0.30362	0.859267
cacna1ba	555941	ENSDARG00000021735	156.542	237.308	183.268	126.289	201.324	205.977	-0.113176	0.914515
cacna1bb	562796	ENSDARG00000116562	24.7693	31.641	60.4289	37.4921	43.4227	28.718	-0.0917813	0.966327
cacna1c	170581	ENSDARG00000008398	819.367	889.904	860.863	814.959	718.449	777.366	-0.153472	0.665101
cacna1da	403310	ENSDARG00000102773	90.1601	89.9792	92.1292	27.6257	55.2653	74.2706	-0.792881	0.307625
cacna1db	403311		0	28.6747	36.6536	16.7728	27.6326	31.6888	0.220038	0.957275
cacna1e	564274	ENSDARG00000062346	0	15.8205	13.8689	3.94653	22.6982	3.9611	0.0438857	0.99431
cacna1eb	567702	ENSDARG00000095614	37.6493	19.7757	24.7659	14.7995	34.5408	36.6402	0.0650033	0.978554
cacna1fa	793708		21.7969	71.1923	71.3259	51.3049	44.4096	62.3873	-0.0556667	0.978554
cacna1fb	559964	ENSDARG00000112226	0	0	4.95318	0	9.8688	4.95138	1.58125	0.818855
cacna1g	563904	ENSDARG00000089913	1094.8	1450.54	1456.24	1193.83	1424.07	1311.12	-0.026405	0.968695
cacna1ha	560875	ENSDARG00000060496	13.8708	9.88783	7.9251	9.86633	19.7376	7.9222	0.244257	0.939746
cacna1i	566351	ENSDARG00000070522	8.91693	13.843	5.94382	10.853	12.8294	7.9222	0.138894	0.968695
cacna1sa	570683	ENSDARG00000029457	248.683	232.364	175.343	81.8905	181.586	130.716	-0.735657	0.174649
cacna1sb	405791	ENSDARG00000042552	177.348	156.228	123.83	46.3717	85.8586	160.425	-0.644355	0.468544
cacna2d1	101882457	ENSDARG00000073752	52.5108	43.5064	87.1761	6.90643	33.5539	38.6207	-1.21205	0.289477
cacna2d1a	561434	ENSDARG00000014804	407.207	526.032	496.309	160.821	380.936	487.215	-0.474383	0.50865
cacna2d2a	541376	ENSDARG00000103390	140.689	88.9904	88.1667	23.6792	40.4621	36.6402	-1.65713	0.00165518
cacna2d2b	568759	ENSDARG00000078169	0.99077	3.95513	15.8502	0.986633	7.89504	3.9611	-0.695313	0.887408
cacna2d3	100148645	ENSDARG00000078760	63.4093	45.484	71.3259	41.4386	90.793	136.658	0.577221	0.603407
cacna2d3a	100535196	ENSDARG00000106018	15.8523	11.8654	4.95318	0	0	0	-5.90517	0.0195014
cacnb1	436925	ENSDARG00000002167	210.043	174.026	165.436	76.9574	96.7143	143.59	-0.792534	0.0989855
cacnb2a	795492	ENSDARG00000099045	228.868	269.938	301.154	86.8237	139.15	185.181	-0.960306	0.0248712
cacnb2b	558806	ENSDARG00000055565	0.99077	4.94391	11.8876	12.8262	1.97376	7.9222	0.350432	0.942941
cacnb3a	565158	ENSDARG00000113797	41.6124	33.6186	23.7753	19.7327	36.5146	18.8152	-0.399366	0.817839
cacnb3b	559015	ENSDARG00000076030	49.5385	19.7757	39.6255	20.7193	51.3178	54.4651	0.21563	0.917255
cacnb4a	562422	ENSDARG00000009738	10.8985	20.7644	49.5318	13.8129	8.88192	24.7569	-0.77504	0.702368
cacnb4b	678560	ENSDARG00000062174	26.7508	10.8766	59.4382	16.7728	16.777	15.8444	-0.974561	0.541238
cacng1a	322013	ENSDARG00000008772	46.5662	10.8766	9.90637	7.89306	27.6326	22.7763	-0.208101	0.950708
cacng2a	393614	ENSDARG00000032565	0	7.91026	17.8315	0	8.88192	3.9611	-1.00312	0.851962
cacng3a	567438	ENSDARG00000058460	18.8246	19.7757	24.7659	10.853	9.8688	0.990275	-1.54489	0.370336
cacng3b	564883	ENSDARG00000076401	13.8708	17.7981	13.8689	15.7861	16.777	11.8833	-0.0349644	0.992186
cacng4a	797554	ENSDARG00000115540	17.8339	2.96635	0	0	0	0.990275	-4.29193	0.348478
cacng4b	794222	ENSDARG00000074669	168.431	113.71	118.876	98.6633	153.953	181.22	0.113464	0.925367
cacng6a	100034580	ENSDARG00000036457	54.4924	118.654	29.7191	20.7193	30.5933	17.825	-1.55296	0.0890958
cacng6b	100003220	ENSDARG00000046079	15.8523	10.8766	17.8315	10.853	15.7901	19.8055	0.0598319	0.985219
cacng8b	100003329	ENSDARG00000070626	0.99077	0.988783	13.8689	2.9599	21.7114	15.8444	1.35421	0.675412
cactin	100126813	ENSDARG00000059866	123.846	162.16	180.296	188.447	197.376	197.065	0.321942	0.573487
cacul1	100538081	ENSDARG00000021885	141.68	132.497	151.567	157.861	127.308	189.143	0.155817	0.858291
cacybp	405823	ENSDARG00000014731	95.1139	71.1923	89.1573	124.316	96.7143	60.4068	0.139775	0.916916
cad	266992	ENSDARG00000041895	3000.05	1676.98	1981.27	4420.12	3151.11	3703.63	0.759886	0.00940073
cadm1a	569931	ENSDARG00000031075	108.985	305.534	306.107	106.556	178.625	233.705	-0.473867	0.632309
cadm1b	562183	ENSDARG00000042677	0	5.9327	3.96255	6.90643	17.7638	3.9611	1.5327	0.64428
cadm2a	793954	ENSDARG00000110607	96.1047	95.9119	122.839	167.728	137.176	123.784	0.445277	0.450944
cadm2b	571698	ENSDARG00000062633	17.8339	0	7.9251	3.94653	1.97376	14.8541	-0.310372	0.956801
cadm3	692273	ENSDARG00000057013	189.237	194.79	347.714	454.838	700.685	502.07	1.1797	0.00103856
cadm4	492787	ENSDARG00000040291	36.6585	66.2484	102.036	20.7193	65.1341	71.2998	-0.3831	0.8231
cadps2	407617	ENSDARG00000117190	65.3908	37.5737	41.6068	23.6792	46.3834	59.4165	-0.159117	0.933504
cadpsa	100333933	ENSDARG00000043661	0.99077	41.5289	39.6255	35.5188	109.544	85.1637	1.48676	0.338408
cadpsb	100001129	ENSDARG00000070567	18.8246	39.5513	72.3165	5.9198	29.6064	48.5235	-0.636963	0.76273
cahz	30331	ENSDARG00000011166	0	12.8542	7.9251	3.94653	0	18.8152	0.131252	0.986251
calb2b	393684	ENSDARG00000036344	9.9077	7.91026	0	14.7995	3.94752	4.95138	0.411495	0.934987
calcoco1a	334971	ENSDARG00000036695	152.579	102.833	109.961	89.7836	93.7536	103.979	-0.345729	0.644169
calcoco1b	386968	ENSDARG00000016391	8.91693	15.8205	11.8876	13.8129	23.6851	19.8055	0.645719	0.737352
calcoco2	553776	ENSDARG00000052515	4.95385	10.8766	9.90637	4.93316	21.7114	16.8347	0.756404	0.767546
calcr	560268	ENSDARG00000109526	26.7508	20.7644	16.8408	20.7193	13.8163	25.7472	-0.094399	0.970329
calcrl2	100537117	ENSDARG00000033955	140.689	125.575	130.764	214.099	183.56	199.045	0.587782	0.109227
calcrla	445508	ENSDARG00000011473	1040.31	1033.28	918.32	394.653	528.968	413.935	-1.16146	5.73063e-09
calcrlb	567131	ENSDARG00000011571	1028.42	1047.12	1122.39	200.286	303.959	297.083	-1.9967	6.22092e-20
cald1a	322909	ENSDARG00000112416	702.456	817.723	731.09	907.702	764.832	730.823	0.0943172	0.856559
cald1b	563892	ENSDARG00000086391	34.677	89.9792	113.923	5.9198	17.7638	19.8055	-2.4559	0.00264671
calhm2	368657	ENSDARG00000039482	55.4831	51.4167	79.251	103.596	103.622	68.329	0.5659	0.465834
calm1a	406660	ENSDARG00000021811	534.025	549.763	535.935	423.266	413.503	338.674	-0.462519	0.0750752
calm1b	368217	ENSDARG00000034187	31.7046	52.4055	77.2697	564.354	333.566	203.997	2.7715	1.59373e-08
calm2a	336121	ENSDARG00000111871	1132.45	940.332	833.126	962.954	699.698	589.214	-0.367852	0.373046
calm2b	192322	ENSDARG00000015050	2346.14	1751.13	1674.18	2099.55	1497.1	1247.75	-0.252608	0.622269
calm3a	327379	ENSDARG00000100825	143.662	96.9007	55.4757	86.8237	86.8455	65.3582	-0.308573	0.798486
calm3b	321808	ENSDARG00000074057	3547.95	2481.84	2431.02	3716.65	2612.27	2285.56	0.0259711	0.975621
caln2	100007635	ENSDARG00000069766	0	0.988783	11.8876	3.94653	2.96064	0.990275	-0.705043	0.912561
calr	325317	ENSDARG00000076290	2549.25	2915.92	2313.14	2693.51	2771.16	2419.24	0.0194553	0.971977
calr3a	30248	ENSDARG00000103979	3673.78	3713.87	3044.23	3565.69	3590.27	2772.77	-0.0713127	0.894719
calr3b	321315	ENSDARG00000102808	2426.4	2494.7	2154.64	3275.62	3000.12	2119.19	0.246644	0.523386
calua	415241	ENSDARG00000045676	1730.88	1916.26	1750.46	1334.91	1345.12	1216.06	-0.470285	0.00480228
calub	394057	ENSDARG00000005115	794.598	1188.52	923.274	862.317	817.137	676.358	-0.303	0.443097
caly	100307104	ENSDARG00000036008	28.7323	60.3157	44.5787	61.1712	89.8061	66.3484	0.701611	0.41893
camk1b	794026	ENSDARG00000029474	222.923	137.441	159.493	348.281	323.697	230.734	0.796197	0.0456365
camk1da	100144566	ENSDARG00000111604	38.64	77.125	45.5693	92.7435	113.491	64.3679	0.746108	0.351048
camk1db	791176	ENSDARG00000017446	2.97231	3.95513	4.95318	71.0376	52.3047	46.5429	3.83789	3.39955e-07
camk1ga	335654	ENSDARG00000044526	10.8985	11.8654	3.96255	16.7728	16.777	9.90275	0.701188	0.769807
camk2a	550436	ENSDARG00000053617	8.91693	1.97757	19.8127	0	1.97376	11.8833	-1.14827	0.782852
camk2b1	562064	ENSDARG00000011065	389.373	477.582	359.601	249.618	306.92	357.489	-0.424341	0.282388
camk2d1	445208	ENSDARG00000043010	176.357	230.386	123.83	75.9707	102.636	89.1248	-0.986789	0.0309815
camk2d2	436815	ENSDARG00000014273	32.6954	15.8205	47.5506	11.8396	19.7376	12.8736	-1.11174	0.394193
camk2g1	791855	ENSDARG00000071395	1701.15	1540.52	1528.55	1214.55	1272.09	1514.13	-0.253792	0.355296
camk2g2	793359	ENSDARG00000116258	731.188	785.093	736.043	704.456	839.835	933.829	0.137815	0.761978
camk2n1a	553607	ENSDARG00000025855	25.76	31.641	63.4008	21.7059	23.6851	32.6791	-0.629849	0.651998
camk2n1b	100004137		0	0	0	12.8262	0	0	4.55315	1
camk2n2	436915	ENSDARG00000111102	18.8246	10.8766	13.8689	4.93316	15.7901	0.990275	-1.00449	0.715526
camkk1a	541526	ENSDARG00000110417	135.736	244.229	218.931	362.094	286.195	205.977	0.512392	0.384629
camkk1b	100170786	ENSDARG00000114689	0	0.988783	4.95318	4.93316	0	13.8639	1.66143	0.753945
camkvl	553431	ENSDARG00000057000	0	0.988783	0	7.89306	10.8557	0.990275	4.2134	0.248328
camlg	404622	ENSDARG00000100409	89.1693	94.9231	97.0824	164.768	92.7667	75.2609	0.243218	0.833626
camsap1a	402833	ENSDARG00000019208	147.625	139.418	124.82	133.195	203.297	164.386	0.282294	0.685591
camsap1b	561094	ENSDARG00000035122	750.013	861.23	782.603	649.204	949.379	845.695	0.0300704	0.968349
camsap2a	562741	ENSDARG00000111224	650.936	577.449	728.118	669.924	752.003	802.123	0.184909	0.653387
camsap2b	558673		1686.29	1633.47	1362.13	693.603	719.436	660.514	-1.17498	1.29362e-12
camsap3	556256	ENSDARG00000059475	327.945	392.547	356.629	114.449	186.52	227.763	-1.02662	0.00431774
camta1a	797322	ENSDARG00000116922	22.7877	32.6298	50.5225	16.7728	14.8032	39.611	-0.573714	0.736536
camta1b	497465	ENSDARG00000007824	14.8616	52.4055	73.3071	101.623	90.793	81.2026	0.960831	0.322054
camta2	101886599		421.077	553.718	556.738	523.902	603.971	549.603	0.13131	0.812184
cand1	406806	ENSDARG00000017841	3238.83	2376.04	2569.71	3149.33	2668.52	2628.19	0.0453719	0.941839
cand2	555955	ENSDARG00000109268	36.6585	36.585	16.8408	0	23.6851	21.7861	-0.986402	0.703579
cant1a	406558	ENSDARG00000012192	373.52	293.668	271.435	265.404	201.324	229.744	-0.430472	0.301663
cant1b	445201	ENSDARG00000102977	168.431	156.228	67.3633	174.634	168.757	93.0859	0.154995	0.914419
canx	406757	ENSDARG00000037488	8003.44	8268.2	7241.56	8598.51	8503.95	7008.18	0.0362003	0.944307
cap1	334527	ENSDARG00000016350	1366.27	1370.45	1173.9	2809.93	1943.17	1506.21	0.678608	0.0242098
cap2	393809	ENSDARG00000104478	26.7508	50.4279	25.7566	20.7193	25.6589	30.6985	-0.417481	0.799626
capga	565410	ENSDARG00000113278	0	0	0	18.746	4.9344	5.94165	5.76076	0.0352933
capgb	336597	ENSDARG00000099672	217.969	259.061	271.435	700.509	503.309	430.77	1.12693	6.91137e-05
capn10	570311	ENSDARG00000076634	54.4924	115.688	77.2697	103.596	57.2391	60.4068	-0.161507	0.91601
capn12	799247	ENSDARG00000116381	616.259	898.803	508.197	990.579	869.441	611.99	0.289006	0.633675
capn15	100330198	ENSDARG00000060600	350.733	320.366	302.144	405.506	485.545	450.575	0.463112	0.096036
capn1a	393417	ENSDARG00000052702	107.994	139.418	80.2416	56.2381	58.2259	58.4262	-0.922346	0.0850765
capn1b	565106	ENSDARG00000117045	25.76	17.7981	28.7285	18.746	40.4621	24.7569	0.216119	0.920237
capn2a	541374	ENSDARG00000091699	976.9	965.052	720.193	436.092	575.351	417.896	-0.89723	0.000315564
capn2b	563053	ENSDARG00000055592	385.41	423.199	263.509	171.674	239.812	178.25	-0.862319	0.0147968
capn3a	447832	ENSDARG00000041864	12.88	27.6859	25.7566	17.7594	31.5802	43.5721	0.486243	0.787995
capn3b	100034405	ENSDARG00000113539	118.892	93.9343	43.588	25.6525	55.2653	48.5235	-0.986216	0.262055
capn5a	563346	ENSDARG00000103317	233.822	253.128	211.006	285.137	171.717	205.977	-0.0744873	0.941002
capn5b	100006332	ENSDARG00000116589	7.92616	9.88783	0.990637	1.97327	22.6982	13.8639	1.035	0.748891
capn7	556792	ENSDARG00000102987	305.157	229.398	307.097	296.977	260.536	264.403	-0.0342083	0.968964
capn8	337730	ENSDARG00000111228	9.9077	32.6298	31.7004	0.986633	17.7638	6.93193	-1.53136	0.437774
capn9	445107	ENSDARG00000012341	273.453	410.345	149.586	76.9574	151.98	109.921	-1.29831	0.0142991
capns1a	550598	ENSDARG00000035329	410.179	412.322	300.163	272.311	242.773	197.065	-0.656653	0.0508539
capns1b	560033	ENSDARG00000013804	395.317	367.827	222.893	192.393	179.612	168.347	-0.867736	0.0174673
caprin1a	445090	ENSDARG00000112212	1016.53	788.06	928.227	1111.94	921.746	812.026	0.0584156	0.930447
caprin1b	406341	ENSDARG00000054272	1903.27	1406.05	1915.89	2444.88	1780.33	2277.63	0.315584	0.357114
caprin2	407729	ENSDARG00000020749	0	16.8093	14.8596	9.86633	11.8426	20.7958	0.424438	0.915887
capza1a	327029	ENSDARG00000034240	1031.39	944.287	891.573	1390.17	1057.94	749.638	0.157398	0.811107
capza1b	474327	ENSDARG00000110402	1098.76	937.366	901.48	1572.69	1354	971.46	0.408161	0.232979
capzb	335083	ENSDARG00000100252	1370.24	996.693	873.742	1664.45	1199.06	1017.01	0.259969	0.638481
card11	557072	ENSDARG00000052741	64.4001	60.3157	30.7097	169.701	125.334	73.2804	1.24474	0.0540142
card14	568689	ENSDARG00000103485	22.7877	47.4616	14.8596	0	31.5802	29.7083	-0.473772	0.89499
card19	557314	ENSDARG00000091304	165.459	102.833	133.736	190.42	123.36	135.668	0.160898	0.880222
card9	796425	ENSDARG00000067672	72.3262	32.6298	42.5974	213.113	109.544	132.697	1.62581	0.00264999
carf	555728	ENSDARG00000019950	160.505	169.082	218.931	225.939	225.996	260.442	0.377094	0.426218
carhsp1	393534	ENSDARG00000053129	429.994	480.548	458.665	296.977	227.969	294.112	-0.741323	0.00323489
carkd	797867	ENSDARG00000077119	486.468	510.212	533.953	622.565	653.315	669.426	0.345863	0.155639
carm1	445251	ENSDARG00000018698	1295.93	920.557	1270.99	1761.14	1344.13	1492.34	0.398713	0.191609
carm1l	100003090	ENSDARG00000109800	0.99077	1.97757	11.8876	0	1.97376	1.98055	-1.90975	0.683476
carnmt1	503765	ENSDARG00000102865	10.8985	11.8654	17.8315	31.5723	27.6326	38.6207	1.26889	0.21457
cars	368284	ENSDARG00000036164	421.077	319.377	295.21	450.891	288.169	261.433	-0.0498178	0.963674
cars2	555187	ENSDARG00000078546	130.782	201.712	162.464	172.661	211.192	200.036	0.238358	0.737513
casc3	403025	ENSDARG00000029911	876.832	746.531	803.407	838.638	706.606	734.784	-0.089975	0.858291
casc4	555654	ENSDARG00000074490	313.083	413.311	402.199	401.56	365.146	393.139	0.0393946	0.960328
casc5	327226	ENSDARG00000070239	1962.72	1548.43	1655.35	1547.04	1301.7	1225.96	-0.342486	0.199967
casd1	692268	ENSDARG00000023900	149.606	176.992	146.614	226.926	210.205	209.938	0.45142	0.262055
caska	259195	ENSDARG00000059809	879.804	895.837	846.004	703.469	891.153	850.646	-0.100487	0.838081
caskb	100148073	ENSDARG00000100119	370.548	381.67	380.405	449.905	318.762	327.781	-0.0468139	0.955804
caskin1	563678	ENSDARG00000046107	153.569	292.68	429.936	202.26	245.733	276.287	-0.274702	0.777727
casp2	373118	ENSDARG00000062052	412.16	419.244	429.936	460.758	389.818	380.266	-0.0352992	0.960769
casp3a	140621	ENSDARG00000113754	679.668	499.335	476.496	669.924	430.28	485.235	-0.0623725	0.945071
casp3b	566604	ENSDARG00000055045	26.7508	59.327	33.6817	27.6257	40.4621	21.7861	-0.414153	0.798786
casp6	552927	ENSDARG00000115863	33.6862	57.3494	19.8127	43.4118	37.5014	32.6791	0.0352477	0.990244
casp6l1	791531	ENSDARG00000117004	12.88	6.92148	4.95318	0	6.90816	4.95138	-1.06173	0.779799
casp7	553634	ENSDARG00000091836	50.5293	41.5289	28.7285	28.6124	39.4752	19.8055	-0.458555	0.751642
casp8	58022	ENSDARG00000058325	45.5754	82.069	82.2229	109.516	74.016	115.862	0.512525	0.545774
casp8ap2	541521	ENSDARG00000022718	751.995	657.54	614.195	855.411	704.632	772.415	0.204838	0.589343
casp8l1	100049706		11.8892	23.7308	19.8127	34.5322	28.6195	36.6402	0.848105	0.48186
casp8l2	557302	ENSDARG00000070272	14.8616	6.92148	6.93446	30.5856	10.8557	14.8541	0.971191	0.61975
casp9	492763	ENSDARG00000004325	46.5662	34.6074	49.5318	82.8772	45.3965	46.5429	0.419595	0.727231
caspa	57933	ENSDARG00000008165	11.8892	1.97757	12.8783	13.8129	9.8688	5.94165	0.147659	0.970672
caspb	259303	ENSDARG00000052039	64.4001	260.05	108.97	41.4386	121.386	50.504	-1.02268	0.309796
casq1a	445226	ENSDARG00000116662	188.246	149.306	97.0824	43.4118	130.268	141.609	-0.463167	0.683393
casq1b	767757	ENSDARG00000018105	130.782	78.1138	83.2135	12.8262	36.5146	46.5429	-1.60726	0.0237811
casq2	114410	ENSDARG00000008982	594.462	583.382	485.412	108.53	290.143	261.433	-1.33326	0.000932653
cass4	100000938	ENSDARG00000006775	111.957	97.8895	83.2135	197.327	124.347	120.814	0.59447	0.31381
cast	563084	ENSDARG00000058693	1551.55	2070.51	1703.9	969.86	1448.74	1364.6	-0.49344	0.0902287
casz1	559053	ENSDARG00000037030	207.071	308.5	304.126	203.246	305.933	270.345	-0.0725124	0.94266
cat	30068	ENSDARG00000104702	164.468	152.273	149.586	302.896	192.442	170.327	0.513491	0.335545
cav1	323695	ENSDARG00000103747	590.499	620.955	454.702	503.183	432.254	416.906	-0.30106	0.442824
cav2	415240	ENSDARG00000052000	34.677	58.3382	68.3539	30.5856	27.6326	40.6013	-0.707573	0.483313
cav3	449679	ENSDARG00000024141	59.4462	60.3157	28.7285	5.9198	38.4883	21.7861	-1.16561	0.37549
cavin1a	557070	ENSDARG00000076411	33.6862	18.7869	29.7191	6.90643	27.6326	8.91248	-0.919473	0.594847
cavin1b	561082	ENSDARG00000059362	318.037	378.704	245.678	588.033	527.981	257.472	0.543417	0.348478
cavin2a	402824	ENSDARG00000111926	272.462	408.367	330.873	83.8638	157.901	200.036	-1.19538	0.00523725
cavin2b	447845	ENSDARG00000071196	1715.02	1601.83	1527.56	960.98	938.523	1035.83	-0.722806	2.49193e-06
cavin4a	552940	ENSDARG00000038658	78.2709	100.856	29.7191	10.853	13.8163	22.7763	-2.13828	0.00830561
cavin4b	494036	ENSDARG00000056743	166.449	119.643	117.886	25.6525	74.016	76.2512	-1.19942	0.0629535
cax2	558687	ENSDARG00000015732	31.7046	57.3494	28.7285	32.5589	31.5802	20.7958	-0.471675	0.749689
cbarpb	557421	ENSDARG00000071325	114.929	103.822	117.886	136.155	144.085	138.639	0.31535	0.603589
cbfa2t3	563252	ENSDARG00000079012	641.028	841.454	774.678	875.143	1154.65	767.463	0.309509	0.447017
cbfb	30744	ENSDARG00000040917	1345.47	1315.08	1302.69	2529.73	2255.02	1934.01	0.761523	7.79378e-06
cbl	492364	ENSDARG00000009958	797.57	748.508	886.62	1206.65	939.51	1044.74	0.391413	0.121362
cblb	556277	ENSDARG00000116429	1239.45	1339.8	1257.12	1100.1	1171.43	1171.5	-0.156075	0.597272
cblc	565383	ENSDARG00000078217	25.76	90.968	63.4008	47.3584	65.1341	33.6694	-0.301453	0.864961
cbll1	394041	ENSDARG00000015222	115.92	64.2709	67.3633	86.8237	66.121	104.969	0.0591313	0.970276
cbln1	436793	ENSDARG00000057296	2.97231	25.7083	25.7566	11.8396	4.9344	8.91248	-1.08362	0.646299
cbln18	100002104	ENSDARG00000090969	15.8523	11.8654	24.7659	4.93316	18.7507	11.8833	-0.561297	0.819051
cbln2a	556853	ENSDARG00000074601	23.7785	2.96635	0	0.986633	0	0	-4.65459	0.259607
cbln2b	560583	ENSDARG00000077151	17.8339	7.91026	7.9251	6.90643	2.96064	5.94165	-1.09071	0.659473
cbr1	373866	ENSDARG00000036587	3.96308	3.95513	2.97191	20.7193	11.8426	10.893	1.99653	0.227557
cbr1l	337696	ENSDARG00000021149	128.8	159.194	80.2416	188.447	176.652	107.94	0.361343	0.689443
cbr4	402954	ENSDARG00000009074	8.91693	10.8766	19.8127	13.8129	25.6589	11.8833	0.374866	0.888737
cbsa	550524	ENSDARG00000112676	0.99077	7.91026	1.98127	41.4386	22.6982	27.7277	3.07711	0.0115798
cbsb	266987	ENSDARG00000010946	189.237	237.308	295.21	303.883	376.988	317.878	0.468619	0.260535
cbwd	406536	ENSDARG00000111371	8.91693	26.6971	22.7846	38.4787	29.6064	21.7861	0.621916	0.71561
cbx1a	326746	ENSDARG00000110945	916.463	630.843	768.734	964.927	752.99	687.251	0.0544952	0.945746
cbx1b	415180	ENSDARG00000054442	133.754	72.1811	85.1948	79.9173	72.0423	76.2512	-0.351268	0.712146
cbx2	327291	ENSDARG00000044938	384.419	309.489	461.637	468.651	375.014	548.612	0.268869	0.620677
cbx3a	751689	ENSDARG00000003860	647.964	508.234	505.225	881.063	508.243	560.496	0.230922	0.714938
cbx3b	567497	ENSDARG00000092158	97.0955	91.9568	111.942	87.8103	36.5146	59.4165	-0.712039	0.343094
cbx4	573110	ENSDARG00000099441	66.3816	111.732	107.979	77.944	85.8586	142.6	0.0988621	0.947605
cbx5	563396	ENSDARG00000061187	1794.29	1187.53	1132.3	1757.19	1292.81	1359.65	0.100091	0.893434
cbx6a	799294	ENSDARG00000071051	270.48	321.354	310.069	371.961	343.434	292.131	0.159787	0.780421
cbx6b	556231		163.477	234.341	205.062	233.832	236.851	303.024	0.359873	0.484871
cbx7a	550551	ENSDARG00000038025	53.5016	59.327	74.2978	174.634	214.153	181.22	1.60698	2.37786e-06
cbx8a	100150672	ENSDARG00000087327	32.6954	80.0914	88.1667	76.9574	58.2259	126.755	0.382298	0.779201
cbx8b	799361	ENSDARG00000110903	66.3816	21.7532	21.794	32.5589	18.7507	18.8152	-0.648487	0.704755
cby1	326875	ENSDARG00000113018	40.6216	23.7308	26.7472	46.3717	20.7245	31.6888	0.116894	0.958726
cc2d1a	100001297	ENSDARG00000036281	502.321	605.135	540.888	546.595	523.047	491.176	-0.078714	0.892642
cc2d1b	563720	ENSDARG00000099445	315.065	259.061	225.865	299.936	238.825	171.318	-0.171964	0.841386
cc2d2a	570250	ENSDARG00000090971	281.379	479.56	458.665	387.747	491.466	508.011	0.185771	0.794285
ccar1	568087	ENSDARG00000114899	742.087	755.43	649.858	697.549	712.528	699.134	-0.0258735	0.966061
ccar2	564155	ENSDARG00000038302	87.1878	117.665	117.886	140.102	101.649	133.687	0.218183	0.808499
ccbe1	555629	ENSDARG00000086158	45.5754	38.5625	53.4944	35.5188	44.4096	67.3387	0.0975506	0.95754
ccbl1	791592	ENSDARG00000023645	26.7508	15.8205	15.8502	20.7193	16.777	18.8152	-0.0530358	0.985357
ccbl2	393315	ENSDARG00000101791	86.197	74.1587	91.1386	98.6633	92.7667	89.1248	0.157788	0.881231
ccdc102a	325319	ENSDARG00000003872	564.739	579.427	602.307	282.177	360.211	341.645	-0.827676	0.000121774
ccdc103	437026	ENSDARG00000053455	0	1.97757	3.96255	0.986633	1.97376	9.90275	1.11444	1
ccdc106a	503526	ENSDARG00000004211	252.646	200.723	225.865	184.5	180.599	222.812	-0.208328	0.737513
ccdc113	450041	ENSDARG00000006981	16.8431	22.742	4.95318	4.93316	0	6.93193	-1.90861	0.436314
ccdc114	492767	ENSDARG00000015010	2.97231	14.8317	3.96255	0	5.92128	4.95138	-1.00162	0.820391
ccdc115	503608	ENSDARG00000109365	2.97231	32.6298	8.91573	8.8797	7.89504	20.7958	-0.245005	0.951124
ccdc12	793027	ENSDARG00000113770	14.8616	28.6747	22.7846	46.3717	40.4621	30.6985	0.825512	0.459134
ccdc120	768286	ENSDARG00000114382	162.486	137.441	95.1011	75.9707	72.0423	72.2901	-0.842463	0.0911749
ccdc124	393537	ENSDARG00000043502	165.459	157.216	175.343	286.124	128.294	137.648	0.148677	0.90291
ccdc125	565477	ENSDARG00000056477	0	6.92148	6.93446	13.8129	13.8163	13.8639	1.58225	0.513486
ccdc126	751690	ENSDARG00000062695	81.2432	56.3606	57.4569	76.9574	69.0816	62.3873	0.0956611	0.947542
ccdc127a	751722	ENSDARG00000104344	11.8892	3.95513	13.8689	6.90643	0.98688	5.94165	-1.10281	0.718056
ccdc127b	792067	ENSDARG00000008946	5.94462	0	3.96255	6.90643	10.8557	9.90275	1.48171	0.633699
ccdc129	100334805	ENSDARG00000086805	0	25.7083	14.8596	35.5188	29.6064	15.8444	0.996996	0.708889
ccdc13	555345	ENSDARG00000063451	0	9.88783	2.97191	0	0.98688	7.9222	-0.529925	0.946122
ccdc130	402887	ENSDARG00000113467	63.4093	76.1363	65.382	97.6767	58.2259	66.3484	0.117089	0.932843
ccdc135	555782	ENSDARG00000100231	10.8985	29.6635	20.8034	31.5723	29.6064	69.3193	1.08838	0.358717
ccdc137	767789	ENSDARG00000110733	40.6216	36.585	82.2229	86.8237	36.5146	94.0761	0.447522	0.749475
ccdc14	562752	ENSDARG00000098734	599.416	535.92	614.195	507.129	590.154	503.06	-0.128572	0.787574
ccdc141	553274	ENSDARG00000095675	4.95385	33.6186	27.7378	47.3584	53.2915	53.4749	1.21672	0.303004
ccdc142	569287	ENSDARG00000101377	265.526	194.79	199.118	177.594	190.468	203.006	-0.207568	0.751863
ccdc146	767671	ENSDARG00000004794	11.8892	25.7083	21.794	4.93316	5.92128	15.8444	-1.15379	0.520365
ccdc149a	449999	ENSDARG00000078829	38.64	53.3943	11.8876	29.599	26.6458	24.7569	-0.359505	0.863311
ccdc149b	436983	ENSDARG00000111838	16.8431	15.8205	52.5038	34.5322	16.777	33.6694	-0.00319345	0.999905
ccdc15	100333818	ENSDARG00000067517	10.8985	52.4055	63.4008	41.4386	59.2128	38.6207	0.136436	0.957033
ccdc151	555601	ENSDARG00000113033	17.8339	47.4616	45.5693	27.6257	40.4621	28.718	-0.195646	0.924278
ccdc153	792470	ENSDARG00000077161	12.88	7.91026	6.93446	13.8129	17.7638	10.893	0.615351	0.795126
ccdc157	368731	ENSDARG00000056279	0.99077	9.88783	3.96255	4.93316	8.88192	6.93193	0.483128	0.910688
ccdc160	108192093	ENSDARG00000075492	38.64	48.4503	53.4944	53.2782	40.4621	39.611	-0.0761818	0.965504
ccdc167	556080	ENSDARG00000045850	2.97231	34.6074	30.7097	43.4118	33.5539	23.7666	0.560779	0.810065
ccdc171	100330004	ENSDARG00000027381	214.006	147.329	158.502	158.848	137.176	136.658	-0.264722	0.706253
ccdc174	541361	ENSDARG00000023858	262.554	179.958	205.062	219.033	186.52	213.899	-0.0640411	0.947337
ccdc177	795175		13.8708	12.8542	35.6629	0	21.7114	39.611	-0.0249241	0.996184
ccdc178	794803	ENSDARG00000090429	0	0	2.97191	0	16.777	0	2.4972	0.741805
ccdc180	100538012	ENSDARG00000032372	0	6.92148	7.9251	13.8129	9.8688	5.94165	0.996597	0.779379
ccdc186	557112	ENSDARG00000114218	331.908	437.042	427.955	343.348	338.5	283.219	-0.310595	0.462121
ccdc187	100037381	ENSDARG00000112560	725.244	836.51	1042.15	575.207	788.517	805.094	-0.263776	0.567011
ccdc191	494495	ENSDARG00000115124	100.068	111.732	81.2322	76.9574	85.8586	79.222	-0.275841	0.750178
ccdc22	556259	ENSDARG00000052379	561.767	426.165	518.103	364.068	325.67	338.674	-0.550323	0.039847
ccdc24	541495	ENSDARG00000038793	6.93539	20.7644	23.7753	6.90643	15.7901	4.95138	-0.896597	0.693898
ccdc25	393359	ENSDARG00000021753	64.4001	38.5625	32.691	124.316	69.0816	69.3193	0.953634	0.209732
ccdc28a	326808	ENSDARG00000022983	52.5108	56.3606	44.5787	84.8504	33.5539	38.6207	0.0332704	0.989663
ccdc28b	559814	ENSDARG00000011222	104.031	109.755	124.82	60.1846	49.344	75.2609	-0.873791	0.0814043
ccdc30	563478	ENSDARG00000056961	279.397	376.726	301.154	280.204	343.434	460.478	0.17947	0.80627
ccdc32	564862	ENSDARG00000111063	21.7969	45.484	27.7378	64.1311	49.344	52.4846	0.804487	0.384405
ccdc36	559302	ENSDARG00000097704	0	7.91026	1.98127	0	6.90816	10.893	0.847441	0.894155
ccdc39	100005620		33.6862	45.484	52.5038	29.599	40.4621	31.6888	-0.371933	0.780174
ccdc3a	560952	ENSDARG00000113589	23.7785	50.4279	23.7753	18.746	40.4621	19.8055	-0.310416	0.88471
ccdc3b	553593	ENSDARG00000115026	106.012	132.497	93.1199	174.634	203.297	134.677	0.628295	0.205967
ccdc40	568590	ENSDARG00000113983	67.3724	58.3382	60.4289	62.1579	66.121	88.1345	0.217361	0.851635
ccdc43	393631	ENSDARG00000054446	118.892	57.3494	56.4663	113.463	80.9242	62.3873	0.142045	0.929359
ccdc47	447812	ENSDARG00000054362	1352.4	1374.41	1039.18	1183.96	1088.53	808.065	-0.289828	0.469531
ccdc51	751752	ENSDARG00000058828	43.5939	45.484	34.6723	93.7301	108.557	61.3971	1.09141	0.0668504
ccdc53	393142	ENSDARG00000045563	36.6585	71.1923	62.4101	79.9173	77.9635	89.1248	0.536743	0.524193
ccdc57	100318317	ENSDARG00000087657	234.813	167.104	172.371	178.581	204.284	198.055	0.016575	0.989733
ccdc58	393780	ENSDARG00000045351	43.5939	30.6523	19.8127	54.2648	26.6458	28.718	0.221041	0.912411
ccdc59	564488	ENSDARG00000045755	17.8339	12.8542	31.7004	26.6391	20.7245	11.8833	-0.0743946	0.978267
ccdc61	798766	ENSDARG00000062307	69.3539	60.3157	105.008	51.3049	73.0291	90.115	-0.130074	0.930447
ccdc62	436650	ENSDARG00000111759	27.7416	30.6523	27.7378	16.7728	34.5408	52.4846	0.269051	0.894499
ccdc66	796628		99.077	86.0241	133.736	62.1579	87.8323	133.687	-0.168623	0.900045
ccdc69	794166	ENSDARG00000111091	169.422	170.071	160.483	206.206	202.31	182.211	0.24065	0.668642
ccdc6a	335905	ENSDARG00000112924	979.872	609.09	548.813	584.087	533.902	563.467	-0.346394	0.474412
ccdc6b	393211	ENSDARG00000017595	333.89	211.599	339.788	398.6	398.7	318.869	0.334387	0.526899
ccdc77	555400	ENSDARG00000102145	89.1693	88.9904	61.4195	41.4386	79.9373	66.3484	-0.351915	0.748241
ccdc78	100150366	ENSDARG00000030095	10.8985	7.91026	8.91573	29.599	42.4359	18.8152	1.71243	0.107397
ccdc79	559140	ENSDARG00000058587	7.92616	23.7308	16.8408	6.90643	10.8557	16.8347	-0.487472	0.852564
ccdc80	368419	ENSDARG00000000002	2346.14	2095.23	1702.9	1471.07	1443.81	981.363	-0.657151	0.0134314
ccdc80l1	569128	ENSDARG00000030975	967.983	1338.81	1250.18	556.461	583.246	497.118	-1.11974	3.18394e-08
ccdc80l2	796417	ENSDARG00000044695	2140.06	2345.39	2074.39	1843.03	2056.66	1625.04	-0.247754	0.354334
ccdc82	327538	ENSDARG00000014966	305.157	279.825	262.519	314.736	371.067	347.587	0.286095	0.474412
ccdc83	100004068	ENSDARG00000077179	41.6124	69.2148	59.4382	23.6792	26.6458	68.329	-0.521184	0.715293
ccdc84	767736	ENSDARG00000059606	87.1878	144.362	175.343	192.393	194.415	175.279	0.466146	0.463284
ccdc85a	100141348	ENSDARG00000039497	0	1.97757	3.96255	27.6257	15.7901	24.7569	3.52059	0.01348
ccdc85al	447831	ENSDARG00000005343	100.068	113.71	129.773	26.6391	20.7245	34.6596	-2.06655	6.16186e-06
ccdc85b	564324	ENSDARG00000061543	611.305	707.968	668.68	484.437	502.322	396.11	-0.523602	0.0323467
ccdc85ca	751667	ENSDARG00000005232	524.117	462.75	389.32	541.661	554.627	404.032	0.124614	0.85194
ccdc85cb	436901	ENSDARG00000079555	101.059	128.542	90.148	77.944	127.308	87.1442	-0.129017	0.915185
ccdc88aa	100329473	ENSDARG00000078440	24.7693	7.91026	4.95318	5.9198	15.7901	18.8152	0.106797	0.976648
ccdc88ab	100498671		694.53	834.532	770.716	743.921	711.541	788.259	-0.0356146	0.95465
ccdc88b	100330741	ENSDARG00000076189	23.7785	22.742	50.5225	1292.49	854.638	557.525	4.80075	3.36795e-29
ccdc88c	553231	ENSDARG00000053713	824.321	905.725	930.208	795.226	928.654	763.502	-0.0969283	0.842763
ccdc9	550140	ENSDARG00000004636	272.462	214.566	192.184	261.458	254.615	235.685	0.146426	0.840016
ccdc90b	100149897	ENSDARG00000110887	114.929	82.069	81.2322	106.556	88.8192	61.3971	-0.115716	0.931265
ccdc92	571995	ENSDARG00000115475	0	4.94391	3.96255	4.93316	14.8032	16.8347	2.03755	0.417076
ccdc93	678566	ENSDARG00000040678	238.776	195.779	239.734	212.126	171.717	169.337	-0.285584	0.601809
ccdc94	393117	ENSDARG00000026185	111.957	76.1363	106.989	91.7569	82.8979	91.1053	-0.150969	0.893434
ccdc96	559167	ENSDARG00000035963	1.98154	26.6971	23.7753	29.599	17.7638	34.6596	0.644881	0.791085
ccdc97	793800	ENSDARG00000074703	79.2616	64.2709	47.5506	103.596	58.2259	60.4068	0.217887	0.877361
cckar	569038	ENSDARG00000052089	20.8062	22.742	24.7659	0	29.6064	13.8639	-0.652156	0.842763
cckb	100000095	ENSDARG00000100052	3.96308	11.8654	8.91573	0	3.94752	8.91248	-0.944549	0.817212
ccl25b	795788	ENSDARG00000070873	364.603	453.851	409.133	224.952	170.73	160.425	-1.14236	1.83244e-05
ccl27b	794616	ENSDARG00000079713	0	0	0	11.8396	0	0	4.43767	1
ccl32b.3	101884043		0	0	0	7.89306	0	0	3.85271	1
ccl34a.4	100170820	ENSDARG00000090873	1.98154	7.91026	0	141.089	41.449	16.8347	4.33267	0.00109278
ccl34b.1	563952	ENSDARG00000116875	10.8985	0	0	1.97327	0	2.97083	-1.14044	1
ccl39.9	100332212		27.7416	16.8093	10.897	2.9599	16.777	14.8541	-0.680808	0.784207
ccl44	100141480	ENSDARG00000074772	50.5293	71.1923	40.6161	3.94653	23.6851	26.7374	-1.57829	0.14292
ccm2	436586	ENSDARG00000013705	349.742	324.321	312.051	376.894	417.45	311.937	0.165918	0.763651
ccm2l	568661	ENSDARG00000063089	494.394	255.106	266.481	99.6499	110.531	102.989	-1.69785	3.43995e-06
ccna2	192295	ENSDARG00000011094	1364.29	881.005	984.693	1257.96	884.245	910.063	-0.0816385	0.915386
ccnb1	58025	ENSDARG00000051923	623.195	581.404	576.551	583.1	337.513	528.807	-0.297339	0.548139
ccnb2	368316	ENSDARG00000036180	233.822	157.216	206.052	136.155	143.098	139.629	-0.511387	0.261491
ccnb3	767751	ENSDARG00000110875	370.548	370.793	440.833	261.458	228.956	276.287	-0.624721	0.0212278
ccnc	335429	ENSDARG00000009607	181.311	181.936	162.464	192.393	194.415	214.89	0.194749	0.750876
ccnd1	30222	ENSDARG00000101637	4864.68	3844.39	4461.83	5612.95	4793.28	6699.21	0.377101	0.144547
ccnd2a	799608	ENSDARG00000051748	1924.08	1675	1534.5	1983.13	1403.34	1581.47	-0.0473097	0.94427
ccnd2b	565038	ENSDARG00000070408	301.194	252.14	245.678	261.458	218.101	218.851	-0.194124	0.740427
ccndbp1	553373	ENSDARG00000039328	31.7046	47.4616	62.4101	76.9574	71.0554	47.5332	0.465974	0.675065
ccne1	30188	ENSDARG00000113492	57.4647	105.8	75.2884	140.102	104.609	114.872	0.591982	0.373547
ccne2	415165	ENSDARG00000098529	245.711	265.983	275.397	414.386	376.001	410.964	0.61005	0.013149
ccnf	266981	ENSDARG00000105046	1042.29	1155.89	1128.34	715.309	961.221	1049.69	-0.287122	0.417076
ccng1	171473	ENSDARG00000110260	1407.88	900.781	1060.97	1206.65	908.917	984.334	-0.120362	0.852564
ccng2	266794	ENSDARG00000017602	321.01	368.816	375.451	276.257	313.828	296.092	-0.265567	0.511037
ccnh	541325	ENSDARG00000007657	84.2155	54.383	68.3539	69.0643	65.1341	69.3193	-0.0241198	0.989733
ccni	406239	ENSDARG00000068214	1499.04	1235.98	1255.14	1598.35	1061.88	1128.91	-0.0745638	0.912411
ccni2	100330479	ENSDARG00000033046	554.831	534.931	534.944	429.185	528.968	652.591	-0.0124749	0.990244
ccnj	557593	ENSDARG00000059917	98.0863	69.2148	37.6442	102.61	98.688	81.2026	0.463037	0.648117
ccnjl	100001904	ENSDARG00000077116	531.053	442.975	512.159	459.771	497.388	552.574	0.0226712	0.974302
ccnk	569432	ENSDARG00000034146	315.065	286.747	283.322	384.787	324.684	372.343	0.289484	0.452563
ccnl1a	553269	ENSDARG00000116311	1214.68	1997.34	1556.29	1196.79	1630.33	1527	-0.131107	0.841355
ccnl1b	326088	ENSDARG00000012140	711.373	749.497	674.624	842.585	890.166	778.356	0.233758	0.422455
ccnt1	334465	ENSDARG00000017525	561.767	668.417	625.092	483.45	634.564	641.698	-0.0763107	0.906705
ccnt2a	327568	ENSDARG00000036685	772.801	833.544	900.489	750.828	917.799	843.714	0.00316426	0.996553
ccnt2b	321464	ENSDARG00000036510	886.739	985.816	955.965	1051.75	1153.66	1075.44	0.214021	0.430823
ccny	557738	ENSDARG00000063677	370.548	368.816	280.35	332.495	275.34	232.715	-0.278738	0.601883
ccnyl1	767752	ENSDARG00000099692	179.329	156.228	182.277	141.089	160.861	169.337	-0.135893	0.864507
ccpg1	103908643	ENSDARG00000104126	214.997	253.128	265.491	147.008	180.599	217.861	-0.427576	0.360556
ccr11.1	100004625		24.7693	2.96635	1.98127	0	0	0.990275	-4.80661	0.125373
ccr12a	563803	ENSDARG00000038541	0	0	0.990637	80.9039	48.3571	28.718	7.21396	8.26752e-09
ccr12b.1	792585	ENSDARG00000059410	0	0	0.990637	11.8396	10.8557	5.94165	4.75018	0.0647486
ccr12b.2	568139		0	0	1.98127	71.0376	36.5146	13.8639	5.93805	3.38773e-05
ccr6a	558616	ENSDARG00000087474	0	3.95513	8.91573	11.8396	9.8688	32.6791	2.07908	0.339789
ccr9a	553366	ENSDARG00000055186	0.99077	4.94391	5.94382	153.915	96.7143	75.2609	4.77782	7.60896e-12
ccsapa	101883094	ENSDARG00000025325	4.95385	1.97757	1.98127	6.90643	0.98688	13.8639	1.28747	0.724663
ccsapb	100003801	ENSDARG00000040085	164.468	179.958	106.989	125.302	114.478	100.018	-0.409767	0.544081
ccser1	795160	ENSDARG00000111581	73.317	91.9568	106.989	77.944	71.0554	50.504	-0.448525	0.590255
ccser2a	793969	ENSDARG00000087749	172.394	199.734	132.745	116.423	139.15	101.998	-0.497676	0.362987
ccser2b	101883927	ENSDARG00000091535	289.305	246.207	198.127	95.7034	117.439	141.609	-1.04831	0.00313728
cct2	192326	ENSDARG00000104674	857.016	692.148	761.8	1305.32	774.701	861.539	0.348095	0.422397
cct3	192327	ENSDARG00000016173	2360.01	1386.27	1611.77	2900.7	1852.37	1688.42	0.265693	0.661995
cct4	393555	ENSDARG00000013475	1471.29	971.973	1082.77	1877.56	1260.25	1490.36	0.392403	0.295511
cct5	322258	ENSDARG00000045399	1529.75	911.658	1151.12	1946.63	1214.85	1302.21	0.313246	0.546123
cct6a	116994	ENSDARG00000021252	1809.15	1141.06	1417.6	2531.7	1657.96	1730.01	0.438616	0.248493
cct7	192324	ENSDARG00000007385	1542.63	1028.33	1091.68	2046.28	1396.44	1242.8	0.355329	0.437082
cct8	394037	ENSDARG00000008243	1407.88	969.007	1174.9	1724.63	1290.84	1367.57	0.303397	0.416267
ccz1	393103	ENSDARG00000109877	339.834	266.971	259.547	272.311	239.812	188.152	-0.306992	0.570577
cd151	450020	ENSDARG00000038288	9.9077	16.8093	1.98127	0.986633	7.89504	8.91248	-0.689763	0.860827
cd151l	402948	ENSDARG00000068629	252.646	368.816	353.657	272.311	295.077	247.569	-0.258853	0.635933
cd164	555639	ENSDARG00000013628	528.081	485.492	406.161	592.966	438.175	476.322	0.0865088	0.902626
cd22	554810	ENSDARG00000053005	0.99077	3.95513	3.96255	34.5322	37.5014	23.7666	3.42665	0.00109714
cd226	791164	ENSDARG00000045391	0.99077	11.8654	7.9251	6.90643	17.7638	18.8152	1.06508	0.684588
cd248a	323364	ENSDARG00000109369	3362.67	3707.93	4381.59	2587.94	3070.18	2999.54	-0.403575	0.0641283
cd248b	100002565	ENSDARG00000077938	4360.38	4401.07	3904.1	4542.46	4975.85	4841.46	0.181121	0.444854
cd276	791140	ENSDARG00000003061	2230.22	1554.37	1379.96	1134.63	1177.35	986.314	-0.646916	0.0162995
cd28	101886406	ENSDARG00000095070	0	0	8.91573	10.853	3.94752	0.990275	0.824857	0.904316
cd2ap	494040	ENSDARG00000015224	1073	1250.81	1064.93	711.362	798.386	717.949	-0.6052	0.00119501
cd2bp2	393936	ENSDARG00000115297	200.136	167.104	152.558	204.233	163.822	117.843	-0.0972469	0.928163
cd302	100333685	ENSDARG00000086100	222.923	176.003	245.678	210.153	210.205	219.841	-0.00987979	0.99276
cd36	436636	ENSDARG00000032639	20.8062	12.8542	7.9251	22.6926	18.7507	0	-0.00480048	0.999905
[truncated: 19,789 more rows]

## Sheet: intersection
ID	Ensdarg95	NCBI Gene ID	Ens95 RefSeq Classif	Ens95 Nr2f2_y1_1	Ens95 Nr2f2_y1_2	Ens95 Nr2f2_y1_3	Ens95 log2 Fold Change	Ens95padj	Ens95 -log10 padj	RefSeq Nr2f2_y1_1	RefSeq Nr2f2_y1_2	RefSeq Nr2f2_y1_3	RefSeq log2 Fold Change	RefSeq padj	RefSeq -log10 padj
aak1a	ENSDARG00000011855	568999	Ens95only	233.72	161.22	123.86	-1.02	0.0418038	1.37878	322.99	251.15	212	-0.73	0.0514618	1.28851
abca4b	ENSDARG00000062661	555506	Both	24.76	55.39	21.8	-3.23	0.00169206	2.77158	32.7	55.37	21.79	-3.34	0.000809275	3.0919		Nr2f2pos in:
abcc2	ENSDARG00000014031	393561	Both	257.49	171.12	305.2	-1.08	0.00483994	2.31516	257.6	170.07	305.12	-1.08	0.00613171	2.21242		both	456
abcc6b.2	ENSDARG00000094901	100002917	Both	157.47	148.37	173.41	-1.73	0.00135555	2.86788	177.35	169.08	206.05	-1.69	0.000386265	3.41311		Ens95 only	59
abcc9	ENSDARG00000015985	561160	Both	338.7	348.17	568.78	-2.11	0.000151163	3.82055	442.87	459.78	744.96	-2.16	3.98725e-05	4.39933		RefSeq only	44
abi3bpb	ENSDARG00000071095	100149890	Both	779.4	1020.76	841.28	-1.37	5.41446e-11	10.2664	787.66	1024.38	842.04	-1.38	5.04158e-11	10.2974
ablim3	ENSDARG00000088168	566821	Both	207.97	382.78	321.05	-1.65	7.69894e-06	5.11357	209.05	379.69	326.91	-1.73	3.47287e-06	5.45931
ACKR2	ENSDARG00000086314	101887081	Both	53.48	56.38	58.46	-2.66	7.39286e-05	4.13119	67.37	70.2	66.37	-2.33	3.56924e-05	4.44742
acsl3a	ENSDARG00000032079	567157	RefSeqOnly	53.48	52.42	33.69	-1.41	0.0916591	1.03782	55.48	67.24	39.63	-1.58	0.0372062	1.42938
actc1a	ENSDARG00000042535	408256	Ens95only	1155.74	740.84	456.81	-1	0.0272277	1.56499	159.51	399.47	173.36	-0.68	0.425455	0.371147
actn3a	ENSDARG00000013755	58037	Both	1572.67	1039.55	562.84	-1.08	0.0239679	1.62037	1546.59	1026.36	561.69	-1.07	0.0261583	1.58239
adam12	ENSDARG00000079068	563275	Ens95only	1198.32	1192.86	1194.05	-1.37	1.56304e-13	12.806	1324.66	1361.55	1398.78	-0.93	8.33003e-07	6.07935
adam15	ENSDARG00000089213	795199	Both	932.91	921.85	900.74	-1.56	1.40748e-12	11.8516	681.65	685.23	671.65	-1.56	1.48571e-10	9.82807
adamts2	ENSDARG00000075930	571682	Both	89.13	183.97	96.12	-1.46	0.00480869	2.31797	89.17	185.89	104.02	-1.52	0.00314479	2.50241
adgrl4	ENSDARG00000013653	406676	Both	989.36	754.69	972.08	-1.12	7.36817e-07	6.13264	978.88	745.54	969.83	-1.12	1.20576e-06	5.91874
adra1d	ENSDARG00000024101	568614	Both	897.26	821.95	813.54	-1.79	2.0757e-17	16.6828	837.2	771.25	766.75	-1.78	3.2378e-15	14.4897
afap1l1a	ENSDARG00000089162	566757	Both	408.02	445.1	393.39	-1.03	0.000135197	3.86903	414.14	457.81	419.04	-1.05	6.55575e-05	4.18338
amdhd2	ENSDARG00000100376	402981	Both	188.17	102.87	99.09	-1.34	0.0227799	1.64245	178.34	102.83	96.09	-1.32	0.0352933	1.45231
ankrd24	ENSDARG00000062103	565326	Both	173.31	205.73	231.87	-1.29	4.24044e-05	4.37259	173.38	227.42	238.74	-1.3	5.65112e-05	4.24787
anks1ab	ENSDARG00000078901	100003659	Both	218.87	181.01	218.99	-1.92	1.77173e-06	5.7516	302.18	285.76	319.98	-1.71	3.48982e-08	7.4572
ano1	ENSDARG00000102335	407698	Both	155.48	124.63	110.98	-1.99	0.00145467	2.83723	161.5	167.1	149.59	-1.76	0.00221606	2.65442
anos1b	ENSDARG00000004932	30652	Both	384.26	988.12	898.76	-1.79	5.06066e-05	4.29579	389.37	1041.19	929.22	-1.8	3.68668e-05	4.43336
anxa13l	ENSDARG00000013613	554118	Both	107.95	70.23	119.9	-1.55	0.00199162	2.70079	86.2	55.37	113.92	-1.46	0.0151597	1.81931
anxa1a	ENSDARG00000026726	334724	Both	312.95	430.26	243.76	-1.14	0.000430156	3.36637	313.08	425.18	242.71	-1.13	0.000573753	3.24127
anxa1b	ENSDARG00000100095	353358	Ens95only	173.31	273.98	84.23	-1.42	0.045463	1.34234	173.38	266.97	84.2	-1.44	0.0538665	1.26868
anxa1c	ENSDARG00000104359	494158	Both	445.66	938.66	471.67	-1.25	0.0159285	1.79783	454.76	945.28	476.5	-1.22	0.0179042	1.74705
anxa2a	ENSDARG00000003216	325557	Both	254.52	521.26	301.24	-1.35	0.00190017	2.72121	254.63	519.11	298.18	-1.38	0.00210609	2.67652
ap1b1	ENSDARG00000020621	562166	Both	2314.44	2028.65	1945.16	-1.33	1.29219e-16	15.8887	2299.58	1954.82	1881.22	-1.33	2.55576e-14	13.5925
ap1s3b	ENSDARG00000027966	447897	Both	126.76	111.77	93.15	-2.48	4.90046e-07	6.30976	126.82	111.73	93.12	-2.48	8.79954e-07	6.05554
aplnra	ENSDARG00000002172	561935	Both	1648.93	927.78	863.08	-2.14	2.9268e-12	11.5336	1512.91	856.29	792.51	-2.09	4.84351e-11	10.3148
aplnrb	ENSDARG00000036670	565492	Both	1523.16	1229.46	1323.86	-1.83	7.52242e-17	16.1236	1523.8	1228.07	1321.51	-1.83	1.02369e-16	15.9898
aplp2	ENSDARG00000054864	796801	Both	5569.72	4768.48	4616.65	-1.12	4.52811e-15	14.3441	5574.07	4764.94	4609.43	-1.12	2.80305e-15	14.5524
apobb.1	ENSDARG00000022767	321166	Ens95only	365.44	132.54	257.64	-1.13	0.0459503	1.33771	367.58	132.5	257.57	-1.09	0.0668504	1.1749
apoeb	ENSDARG00000040295	30314	Both	1121.07	1211.65	773.9	-1.44	9.45579e-07	6.0243	1121.55	1208.29	772.7	-1.44	1.15039e-06	5.93916
aqp7	ENSDARG00000026787	334529	Both	263.43	284.86	350.78	-1.99	1.15878e-12	11.936	290.3	299.6	366.54	-1.89	2.21404e-11	10.6548
arap3	ENSDARG00000076801	558931	Ens95only	4280.29	3753.65	3395.85	-1.01	5.66218e-11	10.247	4252.39	3733.64	3370.15	-0.99	8.97976e-11	10.0467
arhgap27l	ENSDARG00000061798	566523	Both	1000.25	1220.56	1114.77	-1.03	1.97359e-07	6.70474	1104.71	1308.16	1196.69	-1.01	1.44252e-07	6.84088
arhgef10	ENSDARG00000077788	334278	Both	1911.37	2025.69	1937.23	-1.15	5.92517e-17	16.2273	2312.46	2391.87	2266.58	-1.11	2.02216e-17	16.6942
arl4aa	ENSDARG00000099918	393834	Both	227.78	171.12	135.75	-1.06	0.0104148	1.98235	222.92	170.07	132.75	-1.08	0.0150176	1.8234
arl4ab	ENSDARG00000033182	338267	Both	342.66	277.94	340.87	-1.4	8.93371e-07	6.04897	342.81	276.86	340.78	-1.4	1.39492e-06	5.85545
[truncated: 519 more rows]
