# Supplementary material for: An improved zebrafish transcriptome annotation for sensitive and comprehensive detection of cell type-specific genes
Source: eLife. 2020 Aug 24;9:e55792. doi: 10.7554/eLife.55792 (PMC7486121; doi:10.7554/eLife.55792)
Supplement: Figure 2—source data 4. — Worksheet one is a list of Ens95 genes missing from RefSeq with Ensembl gene ID, matching ZFIN ID and biotype annotation. Worksheet two is a list of RefSeq genes missing from Ensembl with NCBI gene ID, matching ZFIN ID, and coding sequence annotation. Transcript level matching output from gffcompare is included using Ens95 (worksheet 3) or RefSeq (worksheet 4) as a reference. Worksheet five is a transcript level comparison of Ens95 and Ens99. In this case, all transcripts exhibit a complete intron/exon chain match (designated by a ‘=" in class code). Data used to generate Table 3. [file elife-55792-fig2-data4.xlsx]

## Sheet: title
	Figure 2 - source data 4
	Transcript based comparison of RefSeq and Ensembl annotations
	worksheet 1 - List of Ens95 genes missing from RefSeq. Matching ZFIN ID and status of coding sequence annotation are indicated.
	worksheet 2 - List of RefSeq genes missing from Ens95. Matching ZFIN ID and status of coding sequence annotation are indicated.
	worksheet 3 - matched transcript ID output from gffcompare using Ens95 as a reference genome
	worksheet 4 - matched transcript ID output from gffcompare using RefSeq as a reference genome
	worksheet 5 - matched transcript ID output from gffcompare to compare Ens95 and Ens99

## Sheet: 1 Ens95 missing from RefSeq
Ens95 gene ID	Ens95 abbreviation	Ens95 description	ZFIN ID (if available)	biotype
ENSDARG00000071085	adgrg7.2	adhesion G protein-coupled receptor G7, tandem duplicate 2	ZDB-GENE-060503-46	protein_coding
ENSDARG00000090624	ADGRL3	adhesion G protein-coupled receptor L3		protein_coding	Total	protein_coding	T cell receptor gene	ZFIN ID
ENSDARG00000095161	AL590134.1			processed_transcript	2116	670	141	546
ENSDARG00000095368	AL590146.1			processed_transcript
ENSDARG00000092341	AL590150.1			lincRNA
ENSDARG00000117804	AL627126.1			lincRNA
ENSDARG00000096309	AL627258.1			lincRNA
ENSDARG00000103274	AL645792.1			lincRNA
ENSDARG00000095199	AL732515.1			processed_transcript
ENSDARG00000105715	AL772146.1			TEC
ENSDARG00000117701	AL772219.1			lincRNA
ENSDARG00000110792	AL772241.1			protein_coding
ENSDARG00000117427	AL772373.1			lincRNA
ENSDARG00000097122	AL772382.1			lincRNA
ENSDARG00000098223	AL773558.1			processed_transcript
ENSDARG00000117732	AL805905.1			lincRNA
ENSDARG00000097213	AL808121.1			lincRNA
ENSDARG00000117226	AL831726.3			lincRNA
ENSDARG00000098608	AL840638.1			lincRNA
ENSDARG00000114351	AL844186.1			protein_coding
ENSDARG00000099436	AL844563.1			lincRNA
ENSDARG00000095211	AL845306.1			lincRNA
ENSDARG00000095680	AL845324.2			processed_transcript
ENSDARG00000096673	AL845365.1			lincRNA
ENSDARG00000092683	AL845369.1			processed_transcript
ENSDARG00000105758	AL845428.2			unprocessed_pseudogene
ENSDARG00000105766	AL845428.3			unprocessed_pseudogene
ENSDARG00000096526	AL928650.2			lincRNA
ENSDARG00000113858	AL928650.4			protein_coding
ENSDARG00000097119	AL928657.1			lincRNA
ENSDARG00000098023	AL928707.1			lincRNA
ENSDARG00000098039	AL928707.2			lincRNA
ENSDARG00000117700	AL928707.3			lincRNA
ENSDARG00000096695	AL928716.1			lincRNA
ENSDARG00000095778	AL928725.1			processed_transcript
ENSDARG00000101333	AL928808.1			protein_coding
ENSDARG00000105765	AL928851.1			unprocessed_pseudogene
ENSDARG00000095266	AL928866.1			lincRNA
ENSDARG00000117398	AL928866.2			lincRNA
ENSDARG00000097413	AL928870.1			lincRNA
ENSDARG00000094567	AL928920.1			lincRNA
ENSDARG00000096812	AL928920.4			lincRNA
ENSDARG00000097107	AL928927.1			lincRNA
ENSDARG00000094655	AL928977.1			lincRNA
ENSDARG00000096446	AL929009.1			antisense
ENSDARG00000105194	AL929105.1			lincRNA
ENSDARG00000101825	AL929114.2			lincRNA
ENSDARG00000117295	AL929210.2			lincRNA
ENSDARG00000117377	AL929216.1			lincRNA
ENSDARG00000103323	AL929220.1			sense_overlapping
ENSDARG00000095450	AL929237.2			lincRNA
ENSDARG00000110265	AL929237.4			protein_coding
ENSDARG00000117323	AL929294.1			lincRNA
ENSDARG00000105264	AL929304.1			processed_transcript
ENSDARG00000105542	AL929307.1			lincRNA
ENSDARG00000105750	AL929321.2			unprocessed_pseudogene
ENSDARG00000105774	AL929321.3			unprocessed_pseudogene
ENSDARG00000105821	AL929321.4			unprocessed_pseudogene
ENSDARG00000096520	AL929349.1			lincRNA
ENSDARG00000117372	AL929378.1			lincRNA
ENSDARG00000096530	AL929396.1			lincRNA
ENSDARG00000095483	AL929457.1			lincRNA
ENSDARG00000093575	AL929493.1			processed_transcript
ENSDARG00000095566	AL929576.1			processed_transcript
ENSDARG00000095204	AL935117.1			processed_transcript
ENSDARG00000093040	AL935144.1			processed_transcript
ENSDARG00000097045	AL935145.2			lincRNA
ENSDARG00000095991	AL935166.1			processed_transcript
ENSDARG00000094023	AL935183.1			processed_transcript
ENSDARG00000112275	AL935186.6			protein_coding
ENSDARG00000113671	AL935186.8			protein_coding
ENSDARG00000071407	AL935279.1			unprocessed_pseudogene
ENSDARG00000100218	AL935294.1			processed_transcript
ENSDARG00000104739	AL935294.2			lincRNA
ENSDARG00000117663	AL935295.2			lincRNA
ENSDARG00000097519	AL935300.2			lincRNA
ENSDARG00000105171	AL935303.1			processed_transcript
ENSDARG00000117301	AL935322.1			lincRNA
ENSDARG00000117676	AL935334.1			lincRNA
ENSDARG00000094566	AL953841.1			processed_transcript
ENSDARG00000106768	AL953848.1			miRNA
ENSDARG00000095108	AL953855.1			processed_transcript
ENSDARG00000117502	AL953875.1			lincRNA
ENSDARG00000095012	AL953903.1			unprocessed_pseudogene
ENSDARG00000095151	AL953903.2			unprocessed_pseudogene
ENSDARG00000103508	AL953910.1			lincRNA
ENSDARG00000092679	AL954134.2			processed_transcript
ENSDARG00000117430	AL954142.3			lincRNA
ENSDARG00000117560	AL954145.2			lincRNA
ENSDARG00000094070	AL954149.1			processed_transcript
ENSDARG00000094185	AL954149.2			processed_transcript
ENSDARG00000096642	AL954187.1			lincRNA
ENSDARG00000095834	AL954317.1			processed_transcript
ENSDARG00000092905	AL954320.1			processed_transcript
ENSDARG00000105627	AL954672.1			lincRNA
ENSDARG00000112674	AL954682.1			protein_coding
ENSDARG00000093270	AL954694.2			processed_transcript
ENSDARG00000053731	AL954695.1			lincRNA
ENSDARG00000079925	AL954695.2			lincRNA
ENSDARG00000094127	AL954695.3			lincRNA
ENSDARG00000117348	AL954696.2			lincRNA
ENSDARG00000117314	AL954703.1			lincRNA
ENSDARG00000117648	AL954832.1			lincRNA
ENSDARG00000093668	ankmy2b	ankyrin repeat and MYND domain containing 2b	ZDB-GENE-060503-558	protein_coding
ENSDARG00000045666	ANKRD50	ankyrin repeat domain 50		protein_coding
ENSDARG00000114495	ATP8A1	ATPase phospholipid transporting 8A1		protein_coding
ENSDARG00000111376	bivm	basic, immunoglobulin-like variable motif containing	ZDB-GENE-010822-3	protein_coding
ENSDARG00000097977	BX000364.1			lincRNA
ENSDARG00000093103	BX000444.1			processed_transcript
ENSDARG00000117649	BX000460.1			lincRNA
ENSDARG00000098091	BX000463.1			lincRNA
ENSDARG00000117580	BX000522.1			lincRNA
ENSDARG00000102124	BX000696.1			processed_transcript
ENSDARG00000102786	BX000696.2			processed_transcript
ENSDARG00000095460	BX000705.1			processed_transcript
ENSDARG00000092940	BX000981.1			processed_transcript
ENSDARG00000113038	BX000981.10			processed_transcript
ENSDARG00000115032	BX000981.11			processed_transcript
ENSDARG00000117620	BX000981.12			lincRNA
ENSDARG00000093576	BX000981.2			processed_transcript
ENSDARG00000093633	BX000981.3			processed_transcript
ENSDARG00000096100	BX000981.5			processed_transcript
ENSDARG00000111024	BX000981.6			processed_transcript
ENSDARG00000111688	BX000981.7			processed_transcript
ENSDARG00000112599	BX000981.8			processed_transcript
ENSDARG00000112896	BX000981.9			processed_transcript
ENSDARG00000099469	BX000985.1			lincRNA
ENSDARG00000092282	BX000991.1			lincRNA
ENSDARG00000098673	BX001023.1			processed_transcript
ENSDARG00000095883	BX001026.1			lincRNA
ENSDARG00000117798	BX001047.1			lincRNA
ENSDARG00000092943	BX001050.1			unprocessed_pseudogene
ENSDARG00000100470	BX004768.1			lincRNA
ENSDARG00000097970	BX004769.1			lincRNA
ENSDARG00000093141	BX004800.1			processed_transcript
ENSDARG00000096799	BX004803.1			lincRNA
ENSDARG00000096968	BX004812.1			lincRNA
ENSDARG00000095318	BX004840.2			processed_transcript
ENSDARG00000094051	BX004962.1			processed_transcript
ENSDARG00000095141	BX004962.2			processed_transcript
ENSDARG00000092962	BX004981.2			processed_transcript
ENSDARG00000098005	BX004996.1			processed_transcript
ENSDARG00000091985	BX005012.2			processed_transcript
ENSDARG00000095118	BX005024.1			processed_transcript
ENSDARG00000095661	BX005024.2			processed_transcript
ENSDARG00000093927	BX005032.1			processed_transcript
ENSDARG00000117351	BX005042.1			lincRNA
ENSDARG00000117722	BX005043.2			lincRNA
ENSDARG00000098842	BX005073.1			lincRNA
ENSDARG00000099964	BX005073.2			lincRNA
ENSDARG00000095721	BX005108.1			processed_transcript
ENSDARG00000095810	BX005108.2			processed_transcript
ENSDARG00000095965	BX005108.3			processed_transcript
ENSDARG00000097524	BX005129.2			processed_transcript
ENSDARG00000097820	BX005129.4			processed_transcript
ENSDARG00000098020	BX005129.5			processed_transcript
ENSDARG00000094276	BX005156.2			lincRNA
ENSDARG00000105386	BX005156.3			unprocessed_pseudogene
ENSDARG00000097610	BX005183.3			lincRNA
ENSDARG00000117455	BX005229.1			lincRNA
ENSDARG00000096436	BX005275.1			lincRNA
ENSDARG00000117797	BX005302.1			lincRNA
ENSDARG00000117483	BX005308.1			lincRNA
ENSDARG00000112213	BX005321.1			protein_coding
ENSDARG00000098409	BX005376.1			unprocessed_pseudogene
ENSDARG00000117272	BX005389.1			lincRNA
ENSDARG00000117368	BX005389.2			lincRNA
ENSDARG00000117558	BX005389.3			lincRNA
ENSDARG00000117716	BX005389.4			lincRNA
ENSDARG00000098318	BX005396.1			lincRNA
ENSDARG00000103382	BX005398.1			processed_transcript
ENSDARG00000104597	BX005398.2			processed_transcript
ENSDARG00000117375	BX005399.3			lincRNA
ENSDARG00000094688	BX005414.1			processed_transcript
ENSDARG00000093616	BX005419.1			processed_transcript
ENSDARG00000093550	BX005438.1			processed_transcript
ENSDARG00000116893	BX005442.3			protein_coding
ENSDARG00000117629	BX005443.1			lincRNA
ENSDARG00000097395	BX005459.1			lincRNA
ENSDARG00000097602	BX072559.1			lincRNA
ENSDARG00000094159	BX072561.1			processed_transcript
ENSDARG00000099925	BX072564.1			processed_transcript
ENSDARG00000091979	BX085193.1			processed_transcript
ENSDARG00000093824	BX085193.2			processed_transcript
ENSDARG00000094244	BX085193.3			processed_transcript
ENSDARG00000103644	BX088524.3			processed_transcript
ENSDARG00000117222	BX088525.2			lincRNA
ENSDARG00000102462	BX088535.1			antisense
ENSDARG00000105242	BX088547.1			lincRNA
ENSDARG00000100930	BX088583.1			processed_transcript
ENSDARG00000096589	BX088594.1			lincRNA
ENSDARG00000117225	BX088649.1			lincRNA
ENSDARG00000117412	BX088649.2			lincRNA
ENSDARG00000096502	BX088688.1			lincRNA
ENSDARG00000095899	BX088696.2			processed_transcript
ENSDARG00000117595	BX088705.1			lincRNA
ENSDARG00000117776	BX119926.1			lincRNA
ENSDARG00000096135	BX119963.1			lincRNA
ENSDARG00000097457	BX119963.2			antisense
ENSDARG00000092396	BX120005.2			processed_transcript
ENSDARG00000097640	BX120006.3			sense_intronic
ENSDARG00000110722	BX247865.2			protein_coding
ENSDARG00000105337	BX247870.2			lincRNA
ENSDARG00000096265	BX247899.1			antisense
ENSDARG00000117237	BX248092.1			lincRNA
ENSDARG00000098049	BX248121.1			lincRNA
ENSDARG00000094925	BX248322.1			processed_transcript
ENSDARG00000102650	BX248331.2			lincRNA
ENSDARG00000094773	BX248385.1			unprocessed_pseudogene
ENSDARG00000096569	BX248418.1			lincRNA
ENSDARG00000092826	BX248511.1			processed_transcript
ENSDARG00000093854	BX248512.1			processed_transcript
ENSDARG00000095343	BX248512.2			processed_transcript
ENSDARG00000105339	BX248521.1			lincRNA
ENSDARG00000096732	BX255897.1			lincRNA
ENSDARG00000096768	BX255897.2			lincRNA
ENSDARG00000099832	BX255908.1			lincRNA
ENSDARG00000096759	BX255913.2			lincRNA
ENSDARG00000093786	BX255915.1			processed_transcript
ENSDARG00000094970	BX255915.2			processed_transcript
ENSDARG00000093696	BX255917.1			lincRNA
ENSDARG00000117670	BX255917.2			lincRNA
ENSDARG00000100368	BX276088.1			lincRNA
ENSDARG00000093726	BX276096.1			processed_transcript
ENSDARG00000117290	BX276098.1			lincRNA
ENSDARG00000117470	BX284620.1			lincRNA
ENSDARG00000093918	BX284666.2			processed_transcript
ENSDARG00000091922	BX284679.1			processed_transcript
ENSDARG00000099710	BX284696.1			protein_coding
ENSDARG00000097888	BX293559.1			lincRNA
ENSDARG00000117441	BX293559.2			lincRNA
ENSDARG00000097577	BX294100.2			lincRNA
ENSDARG00000093645	BX294113.2			processed_transcript
ENSDARG00000092014	BX294129.1			lincRNA
ENSDARG00000093545	BX294165.1			processed_transcript
ENSDARG00000096779	BX294177.1			lincRNA
ENSDARG00000117773	BX294383.2			lincRNA
ENSDARG00000117492	BX294444.1			lincRNA
ENSDARG00000096595	BX296516.1			lincRNA
ENSDARG00000096646	BX296520.1			lincRNA
ENSDARG00000094302	BX296552.1			processed_transcript
ENSDARG00000117220	BX296552.2			lincRNA
ENSDARG00000117350	BX321882.1			lincRNA
ENSDARG00000097247	BX322555.3			lincRNA
ENSDARG00000096508	BX322618.1			lincRNA
ENSDARG00000096598	BX322618.2			lincRNA
ENSDARG00000094318	BX322647.1			processed_transcript
ENSDARG00000092591	BX322660.1			processed_transcript
ENSDARG00000095530	BX322661.3			processed_transcript
ENSDARG00000105779	BX322787.1			retained_intron
ENSDARG00000117704	BX322792.2			lincRNA
ENSDARG00000093320	BX323028.1			unprocessed_pseudogene
ENSDARG00000105122	BX323031.2			processed_transcript
ENSDARG00000104012	BX323041.1			lincRNA
ENSDARG00000105576	BX323060.1			lincRNA
ENSDARG00000105580	BX323060.2			lincRNA
ENSDARG00000105651	BX323060.3			lincRNA
ENSDARG00000099914	BX323064.1			TR_V_pseudogene
ENSDARG00000095432	BX323074.2			lincRNA
ENSDARG00000096336	BX323079.1			lincRNA
ENSDARG00000109806	BX323083.1			processed_transcript
ENSDARG00000110242	BX323083.2			processed_transcript
ENSDARG00000112850	BX323083.3			processed_transcript
ENSDARG00000115895	BX323083.5			processed_transcript
ENSDARG00000093001	BX323543.1			processed_transcript
ENSDARG00000093084	BX323543.2			processed_transcript
ENSDARG00000093988	BX323543.3			processed_transcript
ENSDARG00000094621	BX323543.4			processed_transcript
ENSDARG00000092781	BX323550.1			processed_transcript
ENSDARG00000117544	BX323550.3			lincRNA
ENSDARG00000093905	BX323559.3			processed_transcript
ENSDARG00000098557	BX323564.1			protein_coding
ENSDARG00000117456	BX323573.1			lincRNA
ENSDARG00000117556	BX323578.1			lincRNA
ENSDARG00000097855	BX323586.3	Small membrane A-kinase anchor protein		protein_coding
ENSDARG00000117821	BX323593.1			lincRNA
ENSDARG00000099047	BX323797.1			lincRNA
ENSDARG00000105543	BX323797.2			lincRNA
ENSDARG00000117706	BX323800.1			lincRNA
ENSDARG00000095995	BX323801.1			processed_transcript
ENSDARG00000096878	BX323807.1			lincRNA
ENSDARG00000097707	BX323807.2			lincRNA
ENSDARG00000092914	BX323812.1			processed_transcript
ENSDARG00000093404	BX323822.1			processed_transcript
ENSDARG00000117219	BX323830.1			lincRNA
ENSDARG00000102604	BX323837.1			antisense
ENSDARG00000094630	BX323854.2			processed_transcript
ENSDARG00000099765	BX323861.1			processed_transcript
ENSDARG00000100413	BX323861.2			processed_transcript
ENSDARG00000104070	BX323876.1			lincRNA
ENSDARG00000105421	BX324006.1			lincRNA
ENSDARG00000117224	BX324006.2			lincRNA
ENSDARG00000117331	BX324006.3			lincRNA
ENSDARG00000098894	BX324119.1			lincRNA
ENSDARG00000097811	BX324126.1			lincRNA
ENSDARG00000097859	BX324134.1			lincRNA
ENSDARG00000097607	BX324166.1			processed_transcript
ENSDARG00000117223	BX324181.2			lincRNA
ENSDARG00000117615	BX324202.1			lincRNA
ENSDARG00000097663	BX324206.2			lincRNA
ENSDARG00000098127	BX324212.1			lincRNA
ENSDARG00000093516	BX324218.1			processed_transcript
ENSDARG00000109743	BX324227.2			protein_coding
ENSDARG00000114675	BX324233.1			protein_coding
ENSDARG00000097604	BX465205.2			lincRNA
ENSDARG00000097775	BX465205.3			lincRNA
ENSDARG00000097392	BX465208.1			lincRNA
ENSDARG00000096609	BX465225.1			processed_transcript
ENSDARG00000097921	BX465857.1			processed_transcript
ENSDARG00000094148	BX465864.1			lincRNA
ENSDARG00000095755	BX465864.2			lincRNA
ENSDARG00000095992	BX469910.1			processed_transcript
ENSDARG00000096127	BX469910.2			antisense
ENSDARG00000096161	BX469918.1			processed_transcript
ENSDARG00000092358	BX469930.1			lincRNA
ENSDARG00000109656	BX470083.1			miRNA
ENSDARG00000110559	BX470083.2			miRNA
ENSDARG00000113637	BX470083.3			miRNA
ENSDARG00000115059	BX470083.4			miRNA
ENSDARG00000115788	BX470083.5			miRNA
ENSDARG00000117212	BX470107.1			lincRNA
ENSDARG00000117749	BX470117.1			lincRNA
ENSDARG00000112132	BX470182.1			protein_coding
ENSDARG00000092120	BX470185.1			lincRNA
ENSDARG00000094883	BX470185.2			lincRNA
ENSDARG00000091977	BX470189.2			lincRNA
ENSDARG00000111600	BX470197.1			protein_coding
ENSDARG00000105629	BX470211.1			lincRNA
ENSDARG00000104363	BX470229.2			protein_coding
ENSDARG00000096417	BX470238.1			antisense
ENSDARG00000111506	BX470259.1	gastrula zinc finger protein XlCGF8.2DB-like		protein_coding
ENSDARG00000116723	BX470259.3			protein_coding
ENSDARG00000097892	BX470264.1			lincRNA
ENSDARG00000096772	BX510319.1			lincRNA
ENSDARG00000110663	BX510335.1			protein_coding
ENSDARG00000112068	BX510335.2			protein_coding
ENSDARG00000112596	BX510335.3			protein_coding
ENSDARG00000113286	BX510335.4			protein_coding
ENSDARG00000114651	BX510335.5			protein_coding
ENSDARG00000096764	BX510919.1			lincRNA
ENSDARG00000094488	BX510923.1			lincRNA
ENSDARG00000093287	BX510924.1			processed_transcript
ENSDARG00000094703	BX510928.1			processed_transcript
ENSDARG00000117567	BX510929.1			lincRNA
ENSDARG00000104884	BX510934.2			lincRNA
ENSDARG00000105754	BX510938.1			lincRNA
ENSDARG00000101133	BX510960.1			lincRNA
ENSDARG00000110503	BX510960.2			lincRNA
ENSDARG00000102446	BX511025.1			lincRNA
ENSDARG00000093642	BX511034.3			processed_transcript
ENSDARG00000111788	BX511067.1			protein_coding
ENSDARG00000117819	BX511073.1			lincRNA
ENSDARG00000117505	BX511078.1			lincRNA
ENSDARG00000117791	BX511078.2			lincRNA
ENSDARG00000102223	BX511079.2			processed_transcript
ENSDARG00000092211	BX511089.1			processed_transcript
ENSDARG00000094855	BX511089.3			processed_transcript
ENSDARG00000117296	BX511089.4			lincRNA
ENSDARG00000092109	BX511093.1			lincRNA
ENSDARG00000074072	BX511100.1			unprocessed_pseudogene
ENSDARG00000091421	BX511100.2			transcribed_unprocessed_pseudogene
ENSDARG00000095785	BX511100.3			unprocessed_pseudogene
ENSDARG00000095845	BX511100.4			unprocessed_pseudogene
ENSDARG00000095948	BX511100.5			processed_transcript
ENSDARG00000095973	BX511100.6			unprocessed_pseudogene
ENSDARG00000105604	BX511109.1			lincRNA
ENSDARG00000091989	BX511112.1			processed_transcript
ENSDARG00000029997	BX511121.1			transcribed_unprocessed_pseudogene
ENSDARG00000091206	BX511123.1			processed_transcript
ENSDARG00000097960	BX511132.1			lincRNA
ENSDARG00000116704	BX511132.2			protein_coding
ENSDARG00000098131	BX511136.1			antisense
ENSDARG00000117698	BX511151.1			lincRNA
ENSDARG00000092272	BX511161.1			lincRNA
ENSDARG00000093398	BX511184.1			processed_transcript
ENSDARG00000117493	BX511218.1			lincRNA
ENSDARG00000113243	BX511224.1			protein_coding
ENSDARG00000094449	BX511231.1			processed_transcript
ENSDARG00000100234	BX511246.1			protein_coding
ENSDARG00000095894	BX511250.1			processed_transcript
ENSDARG00000115642	BX511259.2			protein_coding
ENSDARG00000117227	BX511261.1			lincRNA
ENSDARG00000094139	BX511265.2			processed_transcript
ENSDARG00000113704	BX511265.5			unprocessed_pseudogene
ENSDARG00000097404	BX511308.1			lincRNA
ENSDARG00000097500	BX511311.1			lincRNA
ENSDARG00000116780	BX511311.10			miRNA
ENSDARG00000111834	BX511311.4			miRNA
ENSDARG00000112594	BX511311.5			miRNA
ENSDARG00000113204	BX511311.6			miRNA
ENSDARG00000113606	BX511311.7			miRNA
ENSDARG00000115736	BX511311.8			miRNA
ENSDARG00000116345	BX511311.9			miRNA
ENSDARG00000097300	BX530017.1			processed_transcript
ENSDARG00000101617	BX530032.1			lincRNA
ENSDARG00000117268	BX530032.2			lincRNA
ENSDARG00000093275	BX530037.3			unprocessed_pseudogene
ENSDARG00000094739	BX530079.1			processed_transcript
ENSDARG00000117416	BX530091.1			lincRNA
ENSDARG00000097389	BX530407.4			antisense
ENSDARG00000095682	BX537103.1			processed_transcript
ENSDARG00000101211	BX537130.1			lincRNA
ENSDARG00000095571	BX537162.1			processed_transcript
ENSDARG00000117573	BX537168.1			lincRNA
ENSDARG00000111123	BX537263.1			pseudogene
ENSDARG00000112308	BX537263.2			pseudogene
ENSDARG00000117589	BX537276.1			lincRNA
ENSDARG00000108434	BX537277.1			miRNA
ENSDARG00000116268	BX537277.2			miRNA
ENSDARG00000110416	BX537296.1			miRNA
ENSDARG00000110681	BX537296.2			miRNA
ENSDARG00000111205	BX537296.3			miRNA
ENSDARG00000116707	BX537296.4			miRNA
ENSDARG00000117587	BX537313.1			lincRNA
ENSDARG00000092939	BX537338.1			processed_transcript
ENSDARG00000086095	BX539307.2			protein_coding
ENSDARG00000093730	BX539307.3			processed_transcript
ENSDARG00000097396	BX539313.1			lincRNA
ENSDARG00000093425	BX539332.1			unprocessed_pseudogene
ENSDARG00000103976	BX544877.1			protein_coding
ENSDARG00000094401	BX545856.1			processed_transcript
ENSDARG00000095648	BX545856.2			unprocessed_pseudogene
ENSDARG00000117303	BX545917.1			lincRNA
ENSDARG00000117355	BX545917.2			lincRNA
ENSDARG00000117401	BX545917.3			lincRNA
ENSDARG00000117554	BX545917.4			lincRNA
ENSDARG00000117654	BX545917.6			lincRNA
ENSDARG00000117811	BX545917.7			lincRNA
ENSDARG00000097174	BX546459.1			processed_transcript
ENSDARG00000103536	BX546503.1			lincRNA
ENSDARG00000092913	BX547930.1			lincRNA
ENSDARG00000096513	BX547930.2			lincRNA
ENSDARG00000096657	BX547930.3			lincRNA
ENSDARG00000098779	BX547930.4			protein_coding
ENSDARG00000117526	BX547939.1			lincRNA
ENSDARG00000097409	BX547992.2			processed_transcript
ENSDARG00000093777	BX547993.1			unprocessed_pseudogene
ENSDARG00000092278	BX548015.1			lincRNA
ENSDARG00000096527	BX548015.2			lincRNA
ENSDARG00000098744	BX548018.1			lincRNA
ENSDARG00000096044	BX548032.2			antisense
ENSDARG00000097410	BX548045.1			lincRNA
ENSDARG00000113396	BX548045.2			protein_coding
ENSDARG00000099698	BX548059.1			unprocessed_pseudogene
ENSDARG00000095587	BX548073.5			processed_transcript
ENSDARG00000110432	BX548073.6			miRNA
ENSDARG00000110818	BX548073.7			miRNA
ENSDARG00000113134	BX548073.8			miRNA
ENSDARG00000114222	BX548073.9			miRNA
ENSDARG00000094497	BX548075.3			processed_transcript
ENSDARG00000097874	BX548170.1			lincRNA
ENSDARG00000117562	BX548249.1			lincRNA
ENSDARG00000105331	BX569779.1			lincRNA
ENSDARG00000117468	BX569790.3			lincRNA
ENSDARG00000096832	BX569793.1			lincRNA
ENSDARG00000096790	BX569801.2			lincRNA
ENSDARG00000111789	BX571665.1			protein_coding
ENSDARG00000096323	BX571681.4			lincRNA
ENSDARG00000092118	BX571701.1			processed_transcript
ENSDARG00000092640	BX571701.2			processed_transcript
ENSDARG00000093485	BX571701.3			processed_transcript
ENSDARG00000097833	BX571712.1			lincRNA
ENSDARG00000095145	BX571724.2			unprocessed_pseudogene
ENSDARG00000097112	BX571737.1			lincRNA
ENSDARG00000097995	BX571774.1			lincRNA
ENSDARG00000097619	BX571794.1			lincRNA
ENSDARG00000092378	BX571809.1			processed_transcript
ENSDARG00000117774	BX571809.2			lincRNA
ENSDARG00000074426	BX571825.1			IG_V_pseudogene
ENSDARG00000093479	BX571825.10			IG_V_pseudogene
ENSDARG00000093840	BX571825.11			IG_V_pseudogene
ENSDARG00000093965	BX571825.12			IG_V_pseudogene
ENSDARG00000096469	BX571825.13			IG_pseudogene
ENSDARG00000096477	BX571825.14			IG_C_pseudogene
ENSDARG00000096483	BX571825.15			IG_J_pseudogene
ENSDARG00000096494	BX571825.16			IG_J_pseudogene
ENSDARG00000074762	BX571825.2			IG_V_pseudogene
ENSDARG00000075407	BX571825.3			IG_V_pseudogene
ENSDARG00000076788	BX571825.4			IG_J_pseudogene
ENSDARG00000089547	BX571825.5			IG_C_pseudogene
ENSDARG00000092232	BX571825.6			IG_V_pseudogene
ENSDARG00000092446	BX571825.7			IG_C_pseudogene
ENSDARG00000092537	BX571825.8			IG_V_pseudogene
ENSDARG00000092742	BX571825.9			IG_V_pseudogene
ENSDARG00000095954	BX571828.2			processed_transcript
ENSDARG00000105361	BX571940.1			lincRNA
ENSDARG00000099220	BX571942.1			processed_transcript
ENSDARG00000094450	BX571945.2			processed_transcript
ENSDARG00000092104	BX571955.1			processed_transcript
ENSDARG00000096383	BX572622.1			lincRNA
ENSDARG00000117399	BX601644.4			lincRNA
ENSDARG00000117583	BX601644.5			lincRNA
ENSDARG00000105319	BX601648.1			lincRNA
ENSDARG00000117487	BX640462.3			lincRNA
ENSDARG00000094419	BX640465.1			processed_transcript
ENSDARG00000094849	BX640520.2			processed_transcript
ENSDARG00000095363	BX640520.3			processed_transcript
ENSDARG00000093383	BX640539.1			processed_transcript
ENSDARG00000100855	BX640584.1			antisense
ENSDARG00000117360	BX649276.1			lincRNA
ENSDARG00000112679	BX649279.1			protein_coding
ENSDARG00000092686	BX649292.1			processed_transcript
ENSDARG00000095824	BX649295.1			processed_transcript
ENSDARG00000101475	BX649328.2			lincRNA
ENSDARG00000110031	BX649328.3			protein_coding
ENSDARG00000098721	BX649331.1			unprocessed_pseudogene
ENSDARG00000117453	BX649331.2			lincRNA
ENSDARG00000099916	BX649345.1			lincRNA
ENSDARG00000101124	BX649345.2			lincRNA
ENSDARG00000094545	BX649349.1			lincRNA
ENSDARG00000096131	BX649349.2			lincRNA
ENSDARG00000094299	BX649350.1			antisense
ENSDARG00000117743	BX649350.2			lincRNA
ENSDARG00000097769	BX649397.1			lincRNA
ENSDARG00000097195	BX649398.1			lincRNA
ENSDARG00000094871	BX649434.2			processed_transcript
ENSDARG00000105157	BX649434.3			protein_coding
ENSDARG00000079441	BX649448.1			protein_coding
ENSDARG00000096641	BX649471.1			lincRNA
ENSDARG00000111897	BX649471.2			lincRNA
ENSDARG00000087623	BX649485.1			lincRNA
ENSDARG00000095801	BX649485.2			lincRNA
ENSDARG00000092053	BX649502.1			IG_V_pseudogene
ENSDARG00000095205	BX649502.10			IG_V_pseudogene
ENSDARG00000109903	BX649502.11			protein_coding
ENSDARG00000092135	BX649502.2			unprocessed_pseudogene
ENSDARG00000092437	BX649502.3			IG_V_pseudogene
ENSDARG00000092540	BX649502.4			IG_V_pseudogene
ENSDARG00000093086	BX649502.5			IG_V_pseudogene
ENSDARG00000093446	BX649502.6			IG_V_pseudogene
ENSDARG00000093692	BX649502.7			IG_V_pseudogene
ENSDARG00000094241	BX649502.8			IG_V_pseudogene
ENSDARG00000094596	BX649502.9			IG_pseudogene
ENSDARG00000095089	BX649508.1			unprocessed_pseudogene
ENSDARG00000117708	BX649522.2			lincRNA
ENSDARG00000117270	BX649558.1			lincRNA
ENSDARG00000097780	BX649559.1			processed_transcript
ENSDARG00000092428	BX649599.1			processed_transcript
ENSDARG00000098227	BX649608.1			lincRNA
ENSDARG00000095508	BX649622.1			lincRNA
ENSDARG00000097348	BX649628.1			lincRNA
ENSDARG00000113938	BX649628.2			miRNA
ENSDARG00000092034	BX649633.1			processed_pseudogene
ENSDARG00000093239	BX649641.3			unprocessed_pseudogene
ENSDARG00000098044	BX663503.2			lincRNA
ENSDARG00000089119	BX663516.1			miRNA
ENSDARG00000102689	BX663516.2			lincRNA
ENSDARG00000117799	BX663533.1			lincRNA
ENSDARG00000117417	BX663611.2			lincRNA
ENSDARG00000098835	BX664606.1			processed_transcript
ENSDARG00000101966	BX664606.2			processed_transcript
ENSDARG00000097944	BX664614.1			lincRNA
ENSDARG00000087444	BX664625.2			protein_coding
ENSDARG00000116127	BX664625.5			protein_coding
ENSDARG00000097141	BX664705.1			lincRNA
ENSDARG00000106150	BX664705.2			miRNA
ENSDARG00000112395	BX664705.3			miRNA
ENSDARG00000093486	BX664716.1			processed_transcript
ENSDARG00000051804	BX664721.1			protein_coding
ENSDARG00000068065	BX664721.2			protein_coding
ENSDARG00000102130	BX666065.2			processed_pseudogene
ENSDARG00000099858	BX677667.1			processed_transcript
ENSDARG00000104029	BX677667.2			processed_transcript
ENSDARG00000096551	BX681416.1			lincRNA
ENSDARG00000099208	BX681417.1			unprocessed_pseudogene
ENSDARG00000113108	BX681417.10			TR_J_gene
ENSDARG00000113814	BX681417.11			TR_J_gene
ENSDARG00000113818	BX681417.12			TR_J_gene
ENSDARG00000114580	BX681417.13			TR_J_gene
ENSDARG00000114873	BX681417.14			TR_J_gene
ENSDARG00000115142	BX681417.15			TR_J_gene
ENSDARG00000115225	BX681417.16			TR_J_gene
ENSDARG00000115241	BX681417.17			TR_J_gene
ENSDARG00000115333	BX681417.18			TR_J_gene
ENSDARG00000115580	BX681417.19			TR_J_gene
ENSDARG00000101668	BX681417.2			processed_transcript
ENSDARG00000115584	BX681417.20			TR_J_gene
ENSDARG00000115774	BX681417.21			TR_J_gene
ENSDARG00000115889	BX681417.22			TR_J_gene
ENSDARG00000116253	BX681417.23			TR_J_gene
ENSDARG00000116509	BX681417.25			TR_D_gene
ENSDARG00000116599	BX681417.26			TR_J_gene
ENSDARG00000103217	BX681417.3			unprocessed_pseudogene
ENSDARG00000109933	BX681417.4			TR_J_gene
ENSDARG00000110784	BX681417.5			TR_J_gene
ENSDARG00000111775	BX681417.6			TR_J_gene
ENSDARG00000112754	BX681417.7			TR_J_gene
ENSDARG00000112867	BX681417.8			TR_J_gene
ENSDARG00000113034	BX681417.9			TR_J_gene
ENSDARG00000117462	BX784023.1			lincRNA
ENSDARG00000096218	BX784029.3			lincRNA
ENSDARG00000101788	BX784032.1			processed_transcript
ENSDARG00000094664	BX842684.1			lincRNA
ENSDARG00000101737	BX842687.1			lincRNA
ENSDARG00000093369	BX842702.1			lincRNA
ENSDARG00000095670	BX855614.2			sense_intronic
ENSDARG00000105816	BX855614.4			protein_coding
ENSDARG00000106138	BX855618.1			protein_coding
ENSDARG00000114583	BX890543.1			protein_coding
ENSDARG00000093309	BX890559.1			lincRNA
ENSDARG00000096504	BX890559.2			lincRNA
ENSDARG00000091938	BX890576.1			processed_transcript
ENSDARG00000117246	BX890624.2			lincRNA
ENSDARG00000107760	BX897670.1			protein_coding
ENSDARG00000093075	BX897740.1			processed_transcript
ENSDARG00000093868	BX901878.1			unprocessed_pseudogene
ENSDARG00000078963	BX901881.1			processed_pseudogene
ENSDARG00000078427	BX901889.2			protein_coding
ENSDARG00000079242	BX901889.3			protein_coding
ENSDARG00000114269	BX901889.4			protein_coding
ENSDARG00000115145	BX901889.5			protein_coding
ENSDARG00000096540	BX901898.1			lincRNA
ENSDARG00000096758	BX901952.1			lincRNA
ENSDARG00000067592	BX901974.1			protein_coding
ENSDARG00000101424	BX901974.2			processed_pseudogene
ENSDARG00000117495	BX901974.3			lincRNA
ENSDARG00000117394	BX908385.1			lincRNA
ENSDARG00000092178	BX908388.1			processed_transcript
ENSDARG00000099876	BX908401.1			lincRNA
ENSDARG00000101400	BX908401.2			processed_transcript
ENSDARG00000099626	BX908721.1			unprocessed_pseudogene
ENSDARG00000099201	BX908731.1			protein_coding
ENSDARG00000117820	BX908750.2			lincRNA
ENSDARG00000096630	BX908756.1			lincRNA
ENSDARG00000117359	BX908756.2			lincRNA
ENSDARG00000098577	BX908763.1			processed_transcript
ENSDARG00000075193	BX908780.1			processed_transcript
ENSDARG00000096627	BX908780.3			lincRNA
ENSDARG00000105512	BX908792.1			unprocessed_pseudogene
ENSDARG00000105550	BX908792.2			processed_transcript
ENSDARG00000112843	BX908796.3			protein_coding
ENSDARG00000114685	BX908796.4			lincRNA
ENSDARG00000115344	BX908796.5			lincRNA
ENSDARG00000096260	BX908803.1			antisense
ENSDARG00000117250	BX908803.2			lincRNA
ENSDARG00000117681	BX908803.3			lincRNA
ENSDARG00000117123	BX908804.3			protein_coding
ENSDARG00000117750	BX914197.1			lincRNA
ENSDARG00000039747	BX914200.1			processed_transcript
ENSDARG00000099414	BX914205.1			unprocessed_pseudogene
ENSDARG00000105538	BX914219.1			unprocessed_pseudogene
ENSDARG00000105613	BX914219.3			unprocessed_pseudogene
ENSDARG00000098603	BX914220.1			lincRNA
ENSDARG00000096503	BX927068.1			lincRNA
ENSDARG00000105300	BX927081.1			protein_coding
ENSDARG00000105111	BX927122.2			sense_overlapping
ENSDARG00000100811	BX927130.2			processed_transcript
ENSDARG00000103218	BX927130.3			unprocessed_pseudogene
ENSDARG00000096162	BX927135.1			unprocessed_pseudogene
ENSDARG00000089649	BX927136.1			miRNA
ENSDARG00000098878	BX927164.1			lincRNA
ENSDARG00000094527	BX927181.1			processed_transcript
ENSDARG00000104376	BX927192.1			processed_transcript
ENSDARG00000103255	BX927210.1			protein_coding
ENSDARG00000115246	BX927234.2			protein_coding
ENSDARG00000095619	BX927243.1			unprocessed_pseudogene
ENSDARG00000111258	BX927243.2			processed_transcript
ENSDARG00000116926	BX927243.3			processed_transcript
ENSDARG00000117705	BX927244.2			lincRNA
ENSDARG00000104190	BX927261.1			processed_transcript
ENSDARG00000096925	BX927282.2			lincRNA
ENSDARG00000096681	BX927300.1			antisense
ENSDARG00000091937	BX927308.1			processed_transcript
ENSDARG00000117757	BX927317.3			lincRNA
ENSDARG00000117571	BX927329.2			lincRNA
ENSDARG00000111863	BX927341.1			miRNA
ENSDARG00000113569	BX927341.2			miRNA
ENSDARG00000114079	BX927341.3			miRNA
ENSDARG00000114933	BX927341.4			miRNA
ENSDARG00000116326	BX927341.5			miRNA
ENSDARG00000117796	BX927363.1			lincRNA
ENSDARG00000092056	BX927365.1			processed_transcript
ENSDARG00000105047	BX927369.1			lincRNA
ENSDARG00000117608	BX927376.1			lincRNA
ENSDARG00000095267	BX927385.2			unprocessed_pseudogene
ENSDARG00000094842	BX927394.2			processed_transcript
ENSDARG00000117618	BX927394.3			lincRNA
ENSDARG00000097849	BX927395.1			lincRNA
ENSDARG00000104512	BX936284.1			lincRNA
ENSDARG00000092607	BX936298.1			processed_transcript
ENSDARG00000103105	BX936303.1			processed_transcript
ENSDARG00000117658	BX936303.2			lincRNA
ENSDARG00000117440	BX936305.2			lincRNA
ENSDARG00000097621	BX936342.1			antisense
ENSDARG00000097724	BX936342.2			lincRNA
ENSDARG00000097764	BX936364.1			lincRNA
ENSDARG00000095787	BX936406.1			lincRNA
ENSDARG00000097659	BX936406.2			lincRNA
ENSDARG00000093410	BX936421.1			processed_transcript
ENSDARG00000103487	BX936431.1			lincRNA
ENSDARG00000103194	BX936433.2			lincRNA
ENSDARG00000117316	BX936447.1			lincRNA
ENSDARG00000117300	BX936456.1			lincRNA
ENSDARG00000070299	BX942819.1			protein_coding
ENSDARG00000099272	BX942821.1			protein_coding
ENSDARG00000091861	BX942825.1			processed_transcript
ENSDARG00000114659	BX942837.1			protein_coding
ENSDARG00000093030	BX950184.1			processed_transcript
ENSDARG00000095519	BX950188.2			processed_transcript
ENSDARG00000110966	BX950205.3			protein_coding
ENSDARG00000097967	BX950217.1			lincRNA
ENSDARG00000093973	BX950224.1			processed_transcript
ENSDARG00000103815	BX950855.1			lincRNA
ENSDARG00000117420	BX950865.1			lincRNA
ENSDARG00000100699	BX950868.1			lincRNA
ENSDARG00000104423	BX950868.2			lincRNA
ENSDARG00000097971	BX957251.1			lincRNA
ENSDARG00000099529	BX957252.2			unprocessed_pseudogene
ENSDARG00000093305	BX957257.1			unprocessed_pseudogene
ENSDARG00000096352	BX957260.1			lincRNA
ENSDARG00000097326	BX957270.1			lincRNA
ENSDARG00000117532	BX957306.1			lincRNA
ENSDARG00000094468	BX957308.1			processed_transcript
ENSDARG00000097710	BX957311.1			processed_transcript
ENSDARG00000099958	BX957318.1			protein_coding
ENSDARG00000092802	BX957328.1			processed_transcript
ENSDARG00000096066	BX957333.1			lincRNA
ENSDARG00000096101	BX957333.2			lincRNA
ENSDARG00000104634	BX957336.1			processed_transcript
ENSDARG00000117511	BX957336.2			lincRNA
ENSDARG00000096358	BX957344.1			lincRNA
ENSDARG00000093861	BX957345.1			processed_transcript
ENSDARG00000097128	BX957346.2			lincRNA
ENSDARG00000117257	BX957347.1			lincRNA
ENSDARG00000095728	BX957357.1			unprocessed_pseudogene
ENSDARG00000105755	BX957362.3			processed_pseudogene
ENSDARG00000105771	BX957362.4			TEC
ENSDARG00000117279	CABZ01000591.1			lincRNA
ENSDARG00000102378	CABZ01003056.1			protein_coding
ENSDARG00000115480	CABZ01005857.1			protein_coding
ENSDARG00000117313	CABZ01005857.2			lincRNA
ENSDARG00000102537	CABZ01007816.1			protein_coding
ENSDARG00000117788	CABZ01009248.1			lincRNA
ENSDARG00000105164	CABZ01009511.1			protein_coding
ENSDARG00000103039	CABZ01012962.1			lincRNA
ENSDARG00000116007	CABZ01016118.1			protein_coding
ENSDARG00000117675	CABZ01016692.1			lincRNA
ENSDARG00000114049	CABZ01018956.1			protein_coding
ENSDARG00000100245	CABZ01019032.1			miRNA
ENSDARG00000116283	CABZ01023247.1			protein_coding
ENSDARG00000105041	CABZ01024659.1			protein_coding
ENSDARG00000098212	CABZ01024848.1			protein_coding
ENSDARG00000109919	CABZ01025162.1			protein_coding
ENSDARG00000117429	CABZ01025311.1			lincRNA
ENSDARG00000115175	CABZ01027248.1			protein_coding
ENSDARG00000114113	CABZ01030006.1			protein_coding
ENSDARG00000099418	CABZ01030017.1			protein_coding
ENSDARG00000058631	CABZ01030107.1			protein_coding
ENSDARG00000101795	CABZ01033394.1			protein_coding
ENSDARG00000117469	CABZ01033540.1			lincRNA
ENSDARG00000117625	CABZ01038493.1			lincRNA
ENSDARG00000117349	CABZ01038697.1			lincRNA
ENSDARG00000110326	CABZ01040626.1			protein_coding
ENSDARG00000099474	CABZ01040931.1			protein_coding
ENSDARG00000110165	CABZ01041996.1			miRNA
ENSDARG00000109226	CABZ01042417.1			protein_coding
ENSDARG00000117476	CABZ01043166.1			lincRNA
ENSDARG00000117634	CABZ01043956.1			lincRNA
ENSDARG00000105325	CABZ01044764.1			sense_intronic
ENSDARG00000105501	CABZ01044765.1			lincRNA
ENSDARG00000078289	CABZ01046425.1			protein_coding
ENSDARG00000055841	CABZ01046427.1			protein_coding
ENSDARG00000098740	CABZ01046427.2			protein_coding
ENSDARG00000116445	CABZ01046954.1			protein_coding
ENSDARG00000117374	CABZ01047589.1			lincRNA
ENSDARG00000116043	CABZ01049625.1			protein_coding
ENSDARG00000116955	CABZ01051977.1			protein_coding
ENSDARG00000117765	CABZ01052756.1			lincRNA
ENSDARG00000116759	CABZ01053323.1			protein_coding
ENSDARG00000117396	CABZ01054023.1			lincRNA
ENSDARG00000114461	CABZ01054509.1			protein_coding
ENSDARG00000102022	CABZ01055707.1			protein_coding
ENSDARG00000117263	CABZ01056054.1			lincRNA
ENSDARG00000117479	CABZ01057381.1			lincRNA
ENSDARG00000117443	CABZ01057496.1			lincRNA
ENSDARG00000105080	CABZ01057891.1			protein_coding
ENSDARG00000105373	CABZ01058277.1			lincRNA
ENSDARG00000109607	CABZ01059559.1			protein_coding
ENSDARG00000117243	CABZ01059623.1			lincRNA
ENSDARG00000098527	CABZ01060491.1			protein_coding
ENSDARG00000105487	CABZ01061349.1			lincRNA
ENSDARG00000114386	CABZ01063034.1			protein_coding
ENSDARG00000109948	CABZ01064441.1			protein_coding
ENSDARG00000114976	CABZ01065416.1			protein_coding
ENSDARG00000116796	CABZ01065417.1			protein_coding
ENSDARG00000105329	CABZ01066384.1			processed_transcript
ENSDARG00000109618	CABZ01066611.1			protein_coding
ENSDARG00000117383	CABZ01067440.1			lincRNA
ENSDARG00000117522	CABZ01067754.1			lincRNA
ENSDARG00000117692	CABZ01068352.1			lincRNA
ENSDARG00000117763	CABZ01068359.1			lincRNA
ENSDARG00000117808	CABZ01068366.1			lincRNA
ENSDARG00000117561	CABZ01069945.1			lincRNA
ENSDARG00000104600	CABZ01070527.1			lincRNA
ENSDARG00000117759	CABZ01070579.1			lincRNA
ENSDARG00000102440	CABZ01070852.1			protein_coding
ENSDARG00000114999	CABZ01070852.2			protein_coding
ENSDARG00000117311	CABZ01071326.1			lincRNA
ENSDARG00000117363	CABZ01071845.1			lincRNA
ENSDARG00000117337	CABZ01071874.1			lincRNA
ENSDARG00000110428	CABZ01072614.1			protein_coding
ENSDARG00000117434	CABZ01073166.1			lincRNA
ENSDARG00000109729	CABZ01073197.1			protein_coding
ENSDARG00000115143	CABZ01074470.1			protein_coding
ENSDARG00000117465	CABZ01075319.1			lincRNA
ENSDARG00000103792	CABZ01076737.1			protein_coding
ENSDARG00000086584	CABZ01077217.2			protein_coding
ENSDARG00000117688	CABZ01079837.1			lincRNA
ENSDARG00000117768	CABZ01080006.1			lincRNA
ENSDARG00000110680	CABZ01080098.1			protein_coding
ENSDARG00000113106	CABZ01080371.3			protein_coding
ENSDARG00000111653	CABZ01081490.1			protein_coding
ENSDARG00000110500	CABZ01081897.1			protein_coding
ENSDARG00000099619	CABZ01083166.1			protein_coding
ENSDARG00000115424	CABZ01083778.1			protein_coding
ENSDARG00000117346	CABZ01083945.1			lincRNA
ENSDARG00000111522	CABZ01084081.1			protein_coding
ENSDARG00000114762	CABZ01084131.1			protein_coding
ENSDARG00000108165	CABZ01084774.1			miRNA
ENSDARG00000108627	CABZ01084774.2			miRNA
ENSDARG00000067999	CABZ01084793.1			protein_coding
ENSDARG00000098551	CABZ01085700.1			protein_coding
ENSDARG00000117712	CABZ01086755.1			lincRNA
ENSDARG00000117232	CABZ01087025.1			lincRNA
ENSDARG00000104724	CABZ01087502.1			protein_coding
ENSDARG00000117379	CABZ01088275.1			lincRNA
ENSDARG00000117516	CABZ01089081.1			lincRNA
ENSDARG00000117446	CABZ01089980.1			lincRNA
ENSDARG00000113614	CABZ01092072.1			protein_coding
ENSDARG00000112439	CABZ01092982.1			protein_coding
ENSDARG00000115609	CABZ01099847.1			protein_coding
ENSDARG00000098688	CABZ01101739.1			protein_coding
ENSDARG00000109747	CABZ01103869.1			protein_coding
ENSDARG00000110492	CABZ01103870.1			protein_coding
ENSDARG00000113012	CABZ01112050.1			protein_coding
ENSDARG00000106601	CABZ01112344.1			protein_coding
ENSDARG00000117575	CABZ01113467.1			lincRNA
ENSDARG00000117370	CABZ01113830.1			lincRNA
ENSDARG00000100540	CABZ01114105.1			protein_coding
ENSDARG00000112526	CABZ01114581.1			protein_coding
ENSDARG00000105822	CABZ01117780.1			lincRNA
ENSDARG00000095564	CABZ01118770.1			protein_coding
ENSDARG00000032993	ccl34b.3	chemokine (C-C motif) ligand 34b, duplicate 3	ZDB-GENE-130603-64	protein_coding
ENSDARG00000104002	ccl39.4	chemokine (C-C motif) ligand 39, duplicate 4	ZDB-GENE-131127-181	protein_coding
ENSDARG00000096060	ccl39a.10	chemokine (C-C motif) ligand 39, duplicate 10	ZDB-GENE-100922-179	protein_coding
ENSDARG00000104440	cdh30	cadherin 30	ZDB-GENE-110406-4	protein_coding
ENSDARG00000097990	CR293498.1			lincRNA
ENSDARG00000115628	CR293532.1			lincRNA
ENSDARG00000104351	CR318589.1			lincRNA
ENSDARG00000117498	CR318590.1			lincRNA
ENSDARG00000105780	CR318600.2			lincRNA
ENSDARG00000105526	CR318601.1			lincRNA
ENSDARG00000105197	CR318620.1			lincRNA
ENSDARG00000100567	CR318647.1			lincRNA
ENSDARG00000095037	CR318668.1			processed_transcript
ENSDARG00000117693	CR318673.1			lincRNA
ENSDARG00000095892	CR339054.1			processed_transcript
ENSDARG00000103972	CR352209.1			protein_coding
ENSDARG00000117356	CR352218.1			lincRNA
ENSDARG00000095872	CR352226.3			processed_transcript
ENSDARG00000095952	CR352226.4			processed_transcript
ENSDARG00000100000	CR352226.5			lincRNA
ENSDARG00000096320	CR352253.1			lincRNA
ENSDARG00000105463	CR352285.1			antisense
ENSDARG00000101568	CR352338.1			lincRNA
ENSDARG00000096720	CR352342.1			protein_coding
ENSDARG00000101547	CR354395.1			protein_coding
ENSDARG00000101994	CR354398.1			protein_coding
ENSDARG00000097252	CR354429.1			lincRNA
ENSDARG00000082399	CR354430.1			miRNA
ENSDARG00000100326	CR354444.1			antisense
ENSDARG00000103549	CR354444.2			lincRNA
ENSDARG00000094509	CR354538.1			processed_transcript
ENSDARG00000117517	CR354540.2			lincRNA
ENSDARG00000093922	CR354542.1			processed_transcript
ENSDARG00000117703	CR354549.10			lincRNA
ENSDARG00000117306	CR354549.2			lincRNA
ENSDARG00000117406	CR354549.3			lincRNA
ENSDARG00000117683	CR354549.8			lincRNA
ENSDARG00000117234	CR354564.1			lincRNA
ENSDARG00000117315	CR354564.2			lincRNA
ENSDARG00000105764	CR354581.1			lincRNA
ENSDARG00000117341	CR354610.2			lincRNA
ENSDARG00000093020	CR356233.2			lincRNA
ENSDARG00000117354	CR361560.1			lincRNA
ENSDARG00000115256	CR376730.3			processed_transcript
ENSDARG00000100433	CR376738.1			protein_coding
ENSDARG00000103445	CR376738.2			protein_coding
ENSDARG00000095393	CR376741.1			processed_transcript
ENSDARG00000117650	CR376741.6			lincRNA
ENSDARG00000097860	CR376776.1			antisense
ENSDARG00000117209	CR376776.2			lincRNA
ENSDARG00000117475	CR376825.1			lincRNA
ENSDARG00000092511	CR376835.1			processed_transcript
ENSDARG00000117769	CR376857.1			lincRNA
ENSDARG00000097748	CR381621.1			lincRNA
ENSDARG00000097211	CR381647.1			lincRNA
ENSDARG00000097450	CR381647.2			lincRNA
ENSDARG00000096190	CR381664.1			lincRNA
ENSDARG00000096193	CR381664.2			lincRNA
ENSDARG00000098337	CR381673.1			protein_coding
ENSDARG00000096746	CR381684.1			lincRNA
ENSDARG00000102174	CR381700.1			lincRNA
ENSDARG00000100098	CR382281.1			protein_coding
ENSDARG00000098798	CR382300.1			processed_transcript
ENSDARG00000101330	CR382300.3			processed_transcript
ENSDARG00000113299	CR382326.1			protein_coding
ENSDARG00000088739	CR382327.1			unprocessed_pseudogene
ENSDARG00000097381	CR382363.1			lincRNA
ENSDARG00000096572	CR382370.1			lincRNA
ENSDARG00000115992	CR382385.1			protein_coding
ENSDARG00000103202	CR383668.1			lincRNA
ENSDARG00000092324	CR383669.1			processed_transcript
ENSDARG00000099782	CR383669.2			protein_coding
ENSDARG00000117213	CR383669.7			lincRNA
ENSDARG00000099970	CR383676.1			lincRNA
ENSDARG00000105368	CR383676.2			lincRNA
ENSDARG00000097922	CR385026.2			lincRNA
ENSDARG00000117826	CR385041.1			lincRNA
ENSDARG00000076277	CR385050.1			protein_coding
ENSDARG00000117264	CR385050.2			lincRNA
ENSDARG00000117756	CR385050.3			lincRNA
ENSDARG00000117590	CR385067.1			lincRNA
ENSDARG00000088490	CR385078.1			processed_transcript
ENSDARG00000096729	CR385078.3			lincRNA
ENSDARG00000096745	CR385078.4			lincRNA
ENSDARG00000096931	CR385086.1			antisense
ENSDARG00000106267	CR388042.1			pseudogene
ENSDARG00000109339	CR388042.2			protein_coding
ENSDARG00000102930	CR388046.1			unprocessed_pseudogene
ENSDARG00000105519	CR388046.2			unprocessed_pseudogene
ENSDARG00000097835	CR388050.1			processed_transcript
ENSDARG00000101382	CR388148.1			unprocessed_pseudogene
ENSDARG00000113324	CR388148.2			protein_coding
ENSDARG00000099543	CR388156.1			lincRNA
ENSDARG00000096693	CR388157.1			lincRNA
ENSDARG00000096928	CR388163.1			processed_transcript
ENSDARG00000089959	CR388164.1			protein_coding
ENSDARG00000101304	CR388172.1			processed_transcript
ENSDARG00000101893	CR388178.1			unprocessed_pseudogene
ENSDARG00000103756	CR388184.2			lincRNA
ENSDARG00000095038	CR388189.1			processed_transcript
ENSDARG00000111781	CR388195.1			protein_coding
ENSDARG00000091901	CR388209.1			lincRNA
ENSDARG00000098541	CR388378.2			processed_transcript
ENSDARG00000100537	CR388413.1			processed_transcript
ENSDARG00000100987	CR388413.2			processed_transcript
ENSDARG00000102278	CR388413.3			processed_transcript
ENSDARG00000105245	CR388413.5			processed_transcript
ENSDARG00000117496	CR388417.1			lincRNA
ENSDARG00000096706	CR388421.1			lincRNA
ENSDARG00000099423	CR391930.1			protein_coding
ENSDARG00000117687	CR391953.1			lincRNA
ENSDARG00000096833	CR391963.1			lincRNA
ENSDARG00000097568	CR391977.1			lincRNA
ENSDARG00000095982	CR391978.1			processed_pseudogene
ENSDARG00000094142	CR391990.1			lincRNA
ENSDARG00000102866	CR391991.1			protein_coding
ENSDARG00000103510	CR391991.2			protein_coding
ENSDARG00000104302	CR391991.3			protein_coding
ENSDARG00000105247	CR391991.5			protein_coding
ENSDARG00000098041	CR391995.1			lincRNA
ENSDARG00000095478	CR392001.1			processed_transcript
ENSDARG00000096119	CR392001.2			lincRNA
ENSDARG00000117159	CR392001.3			protein_coding
ENSDARG00000097431	CR392003.1			processed_transcript
ENSDARG00000094611	CR392012.1			processed_transcript
ENSDARG00000094683	CR392012.2			processed_transcript
ENSDARG00000092287	CR392026.1			processed_transcript
ENSDARG00000097197	CR392042.1			lincRNA
ENSDARG00000094734	CR392363.1			processed_transcript
ENSDARG00000097476	CR396585.1			lincRNA
ENSDARG00000092005	CR396590.1			unprocessed_pseudogene
ENSDARG00000092401	CR396590.2			unprocessed_pseudogene
ENSDARG00000092750	CR396590.3			unprocessed_pseudogene
ENSDARG00000093348	CR396590.4			unprocessed_pseudogene
ENSDARG00000093961	CR396590.5			unprocessed_pseudogene
ENSDARG00000094870	CR396590.6			unprocessed_pseudogene
ENSDARG00000095264	CR396590.7			unprocessed_pseudogene
ENSDARG00000117325	CR396595.1			lincRNA
ENSDARG00000117473	CR396595.2			lincRNA
ENSDARG00000096740	CR405682.1			lincRNA
ENSDARG00000094865	CR407561.1			lincRNA
ENSDARG00000117404	CR407561.2			lincRNA
ENSDARG00000100695	CR407585.1			lincRNA
ENSDARG00000114316	CR407598.1			lincRNA
ENSDARG00000114817	CR407598.2			lincRNA
ENSDARG00000117596	CR450687.1			lincRNA
ENSDARG00000096460	CR450696.1			lincRNA
ENSDARG00000096674	CR450698.1			lincRNA
ENSDARG00000091978	CR450716.1			processed_transcript
ENSDARG00000100688	CR450749.2			processed_transcript
ENSDARG00000102227	CR450749.3			lincRNA
ENSDARG00000094240	CR450777.1			processed_transcript
ENSDARG00000112928	CR450780.2			protein_coding
ENSDARG00000095080	CR450782.1			lincRNA
ENSDARG00000111875	CR450785.2			protein_coding
ENSDARG00000097035	CR450813.1			lincRNA
ENSDARG00000097499	CR450813.2			antisense
ENSDARG00000111889	CR450827.5			unprocessed_pseudogene
ENSDARG00000116770	CR450827.7			unprocessed_pseudogene
ENSDARG00000105716	CR450833.2			unprocessed_pseudogene
ENSDARG00000096892	CR450848.1			lincRNA
ENSDARG00000093224	CR456628.1			processed_transcript
ENSDARG00000093915	CR456628.2			processed_transcript
ENSDARG00000117656	CR457444.10			lincRNA
ENSDARG00000117702	CR457444.11			lincRNA
ENSDARG00000103178	CR457444.3			lincRNA
ENSDARG00000103425	CR457444.4			lincRNA
ENSDARG00000117559	CR457444.8			lincRNA
ENSDARG00000117591	CR457444.9			lincRNA
ENSDARG00000092658	CR457445.1			processed_transcript
ENSDARG00000104957	CR478208.1			processed_transcript
ENSDARG00000093038	CR513782.2			processed_transcript
ENSDARG00000093648	CR513785.1			processed_transcript
ENSDARG00000103270	CR513789.1			lincRNA
ENSDARG00000117330	CR533430.1			lincRNA
ENSDARG00000117783	CR533571.1			lincRNA
ENSDARG00000115891	CR533578.1			protein_coding
ENSDARG00000117576	CR545469.2			lincRNA
ENSDARG00000105381	CR555293.1			lincRNA
ENSDARG00000104802	CR555295.1			lincRNA
ENSDARG00000096558	CR556696.1			lincRNA
ENSDARG00000117327	CR556708.2			lincRNA
ENSDARG00000117415	CR559944.1			lincRNA
ENSDARG00000101339	CR589882.1			processed_transcript
ENSDARG00000117586	CR589944.3			lincRNA
ENSDARG00000098238	CR626866.1			lincRNA
ENSDARG00000100595	CR626884.1			protein_coding
ENSDARG00000104648	CR626884.3			protein_coding
ENSDARG00000116123	CR626884.4			protein_coding
ENSDARG00000096607	CR626902.1			lincRNA
ENSDARG00000094776	CR626923.1			processed_transcript
ENSDARG00000117528	CR628324.1			lincRNA
ENSDARG00000117333	CR628341.2			lincRNA
ENSDARG00000116298	CR628395.1			protein_coding
ENSDARG00000093834	CR628410.1			processed_transcript
ENSDARG00000093890	CR677513.1			lincRNA
ENSDARG00000117366	CR678070.1			lincRNA
ENSDARG00000102570	CR678435.1			lincRNA
ENSDARG00000092001	CR735121.1			processed_transcript
ENSDARG00000116832	CR749164.1			protein_coding
ENSDARG00000099160	CR749168.2			processed_transcript
ENSDARG00000100138	CR749168.3			processed_transcript
ENSDARG00000101470	CR749168.4			processed_transcript
ENSDARG00000092097	CR749763.1			processed_transcript
ENSDARG00000097754	CR749763.5			lincRNA
ENSDARG00000096796	CR751608.1			lincRNA
ENSDARG00000115365	CR753816.1			protein_coding
ENSDARG00000093252	CR753837.1			processed_transcript
ENSDARG00000094314	CR753837.2			processed_transcript
ENSDARG00000092633	CR753844.1			processed_transcript
ENSDARG00000097137	CR753876.1			lincRNA
ENSDARG00000117460	CR759797.1			lincRNA
ENSDARG00000103517	CR759810.1			protein_coding
ENSDARG00000098977	CR759816.1			lincRNA
ENSDARG00000097039	CR759845.1			lincRNA
ENSDARG00000096943	CR759863.1			lincRNA
ENSDARG00000096969	CR759863.2			lincRNA
ENSDARG00000070685	CR759887.1			processed_transcript
ENSDARG00000095238	CR759887.2			processed_transcript
ENSDARG00000117451	CR759887.4			lincRNA
ENSDARG00000096877	CR759918.1			lincRNA
ENSDARG00000093172	CR759927.1			lincRNA
ENSDARG00000117689	CR759955.1			lincRNA
ENSDARG00000095235	CR759970.1			processed_transcript
ENSDARG00000097933	CR762392.1			lincRNA
ENSDARG00000116959	CR762392.2			miRNA
ENSDARG00000109342	CR762395.1			protein_coding
ENSDARG00000097626	CR762400.1			lincRNA
ENSDARG00000117697	CR762407.3			lincRNA
ENSDARG00000109460	CR762420.1			protein_coding
ENSDARG00000093815	CR762470.1			lincRNA
ENSDARG00000098243	CR762475.1			protein_coding
ENSDARG00000092411	CR762493.1			processed_transcript
ENSDARG00000105445	CR769769.2			lincRNA
ENSDARG00000105506	CR769769.3			lincRNA
ENSDARG00000092772	CR769772.1			processed_transcript
ENSDARG00000094676	CR769772.2			processed_transcript
ENSDARG00000095230	CR769772.3			processed_transcript
ENSDARG00000095317	CR769777.1			processed_transcript
ENSDARG00000095779	CR769777.2			processed_transcript
ENSDARG00000117536	CR769778.2			lincRNA
ENSDARG00000096544	CR774189.1			lincRNA
ENSDARG00000062808	CR786571.1			unprocessed_pseudogene
ENSDARG00000097419	CR786571.4			lincRNA
ENSDARG00000093282	CR786582.1			processed_transcript
ENSDARG00000092267	CR788230.1			unprocessed_pseudogene
ENSDARG00000097463	CR788249.2			lincRNA
ENSDARG00000092095	CR788254.1			processed_transcript
ENSDARG00000117752	CR788254.3			lincRNA
ENSDARG00000094315	CR788285.2			processed_transcript
ENSDARG00000105749	CR788316.2			unprocessed_pseudogene
ENSDARG00000092850	CR788322.1			processed_transcript
ENSDARG00000099055	CR790365.1			sense_intronic
ENSDARG00000096919	CR790366.1			processed_transcript
ENSDARG00000098157	CR792416.1			processed_transcript
ENSDARG00000097298	CR792422.2			antisense
ENSDARG00000098482	CR792424.1			antisense
ENSDARG00000109658	CR792453.2			protein_coding
ENSDARG00000100608	CR812468.1			lincRNA
ENSDARG00000097087	CR812472.1			lincRNA
ENSDARG00000091889	CR812481.1			processed_transcript
ENSDARG00000117715	CR812896.1			lincRNA
ENSDARG00000007199	CR846090.1			unprocessed_pseudogene
ENSDARG00000102515	CR847504.1			retained_intron
ENSDARG00000104603	CR847514.1			miRNA
ENSDARG00000097196	CR847531.1			lincRNA
ENSDARG00000117477	CR847563.2			lincRNA
ENSDARG00000096300	CR847785.1			lincRNA
ENSDARG00000097186	CR847799.1			lincRNA
ENSDARG00000093016	CR847870.1			processed_transcript
ENSDARG00000105974	CR847870.3			protein_coding
ENSDARG00000092147	CR847899.1			unprocessed_pseudogene
ENSDARG00000103921	CR847936.2			miRNA
ENSDARG00000109748	CR847936.5			miRNA
ENSDARG00000099001	CR847947.1			lincRNA
ENSDARG00000097529	CR847983.1			lincRNA
ENSDARG00000097864	CR847983.2			lincRNA
ENSDARG00000104562	CR847984.2			lincRNA
ENSDARG00000097341	CR847994.1			lincRNA
ENSDARG00000102703	CR848025.2			lincRNA
ENSDARG00000102710	CR848032.1			lincRNA
ENSDARG00000112460	CR848049.1			protein_coding
ENSDARG00000117733	CR848703.1			lincRNA
ENSDARG00000109891	CR848715.1			protein_coding
ENSDARG00000091976	CR848717.1			processed_transcript
ENSDARG00000094436	CR848723.1			processed_transcript
ENSDARG00000092615	CR848741.1			processed_transcript
ENSDARG00000097182	CR848757.1			lincRNA
ENSDARG00000111400	CR848784.3			processed_transcript
ENSDARG00000116227	CR848784.5			processed_transcript
ENSDARG00000103037	CR848788.1			protein_coding
ENSDARG00000097508	CR848836.1			processed_transcript
ENSDARG00000093163	CR853291.1			processed_transcript
ENSDARG00000097222	CR854827.1			processed_transcript
ENSDARG00000097227	CR854827.2			processed_transcript
ENSDARG00000095780	CR854897.2			unprocessed_pseudogene
ENSDARG00000103429	CR854926.1			lincRNA
ENSDARG00000110055	CR854927.4			protein_coding
ENSDARG00000103675	CR854948.1			processed_transcript
ENSDARG00000096536	CR854964.1			processed_transcript
ENSDARG00000097347	CR854965.2			lincRNA
ENSDARG00000117792	CR854988.1			lincRNA
ENSDARG00000097514	CR854989.1			lincRNA
ENSDARG00000117630	CR855123.1			lincRNA
ENSDARG00000100787	CR855274.1			lincRNA
ENSDARG00000095922	CR855300.1			processed_transcript
ENSDARG00000096848	CR855311.2			lincRNA
ENSDARG00000104489	CR855389.2			lincRNA
ENSDARG00000039888	CR855393.1			protein_coding
ENSDARG00000094270	CR855393.2			unprocessed_pseudogene
ENSDARG00000100012	CR855860.1			lincRNA
ENSDARG00000101183	CR855860.2			lincRNA
ENSDARG00000117486	CR925719.1			lincRNA
ENSDARG00000111643	CR925720.1			protein_coding
ENSDARG00000103548	CR925723.2			processed_transcript
ENSDARG00000105069	CR925723.3			processed_transcript
ENSDARG00000097223	CR925728.2			lincRNA
ENSDARG00000097448	CR925728.3			lincRNA
ENSDARG00000117627	CR925737.1			lincRNA
ENSDARG00000097301	CR925755.1			lincRNA
ENSDARG00000116402	CR925755.2			protein_coding
ENSDARG00000113306	CR925756.1			protein_coding
ENSDARG00000102641	CR925761.3			lincRNA
ENSDARG00000092592	CR925763.1			lincRNA
ENSDARG00000097810	CR925777.1			lincRNA
ENSDARG00000102342	CR925800.1			processed_transcript
ENSDARG00000096973	CR926463.1			lincRNA
ENSDARG00000095303	CR926469.1			lincRNA
ENSDARG00000099492	CR927215.1			protein_coding
ENSDARG00000095632	CR927456.1			processed_transcript
ENSDARG00000095720	CR931763.1			processed_transcript
ENSDARG00000097455	CR931782.1			lincRNA
ENSDARG00000096780	CR932360.2			lincRNA
ENSDARG00000096781	CR932362.1			lincRNA
ENSDARG00000116094	CR932364.1			protein_coding
ENSDARG00000092216	CR932978.1			processed_transcript
ENSDARG00000115023	CR932978.2			processed_transcript
ENSDARG00000115744	CR932978.3			processed_transcript
ENSDARG00000093145	CR932983.1			processed_transcript
ENSDARG00000095016	CR932983.2			processed_transcript
ENSDARG00000093974	CR933734.2			processed_transcript
ENSDARG00000052873	CR933791.1			processed_transcript
ENSDARG00000097821	CR933839.1			antisense
ENSDARG00000095353	CR936240.1			antisense
ENSDARG00000106357	CR936408.2			protein_coding
ENSDARG00000089471	CR936459.1			processed_transcript
ENSDARG00000117523	CR936479.1			lincRNA
ENSDARG00000097882	CR936518.2			lincRNA
ENSDARG00000096295	CR936968.1			lincRNA
ENSDARG00000096420	CR936968.2			lincRNA
ENSDARG00000117685	CR944667.3			lincRNA
ENSDARG00000092630	CR954294.1			processed_transcript
ENSDARG00000098053	CT009746.1			processed_transcript
ENSDARG00000095642	CT025588.1			processed_transcript
ENSDARG00000116629	CT025651.2			protein_coding
ENSDARG00000117721	CT025771.1			lincRNA
ENSDARG00000093614	CT025909.1			processed_transcript
ENSDARG00000095158	CT025913.1			lincRNA
ENSDARG00000097357	CT027551.1			lincRNA
ENSDARG00000101483	CT027586.1			lincRNA
ENSDARG00000096403	CT027638.1			lincRNA
ENSDARG00000098095	CT027696.1			lincRNA
ENSDARG00000094138	CT027756.3			processed_transcript
ENSDARG00000117802	CT027759.1			lincRNA
ENSDARG00000092299	CT027772.1			processed_transcript
ENSDARG00000093881	CT027791.1			processed_transcript
ENSDARG00000096005	CT027801.1			protein_coding
ENSDARG00000097316	CT027805.1			lincRNA
ENSDARG00000105582	CT027807.1			processed_pseudogene
ENSDARG00000104999	CT027980.1			lincRNA
ENSDARG00000105638	CT027989.1			retained_intron
ENSDARG00000104928	CT030005.2			unprocessed_pseudogene
ENSDARG00000105611	CT030012.1			unprocessed_pseudogene
ENSDARG00000111755	CT030017.1			protein_coding
ENSDARG00000115543	CT030048.1			protein_coding
ENSDARG00000105620	CT030153.1			lincRNA
ENSDARG00000111422	CT033803.1			protein_coding
ENSDARG00000115729	CT033803.2			protein_coding
ENSDARG00000096889	CT033825.1			lincRNA
ENSDARG00000097972	CT033842.1			lincRNA
ENSDARG00000096761	CT573006.1			lincRNA
ENSDARG00000093663	CT573186.1			lincRNA
ENSDARG00000096555	CT573186.2			lincRNA
ENSDARG00000095941	CT573247.1			lincRNA
ENSDARG00000117214	CT573279.1			lincRNA
ENSDARG00000105220	CT573285.1			TEC
ENSDARG00000097687	CT573316.3			antisense
ENSDARG00000114721	CT573356.2			protein_coding
ENSDARG00000109581	CT573366.1			protein_coding
ENSDARG00000100173	CT573484.1			processed_transcript
ENSDARG00000098827	CT573793.1			lincRNA
ENSDARG00000102085	CT573793.2			lincRNA
ENSDARG00000104445	CT573793.3			lincRNA
ENSDARG00000103486	CT573799.1			processed_transcript
ENSDARG00000104466	CT573799.2			processed_transcript
ENSDARG00000092300	CT574549.1			antisense
ENSDARG00000095852	CT574585.1			lincRNA
ENSDARG00000105505	CT574585.2			lincRNA
ENSDARG00000093788	CT583625.1			protein_coding
ENSDARG00000092321	CT583646.1			processed_transcript
ENSDARG00000096869	CT583650.1			lincRNA
ENSDARG00000098691	CT583672.1			lincRNA
ENSDARG00000098945	CT583726.1			lincRNA
ENSDARG00000117395	CT583726.2			lincRNA
ENSDARG00000095585	CT583727.1			processed_transcript
ENSDARG00000098155	CT583728.1			rRNA
ENSDARG00000112295	CT583728.14			protein_coding
ENSDARG00000112406	CT583728.15			miRNA
ENSDARG00000116226	CT583728.25			rRNA
ENSDARG00000103635	CT583728.7			rRNA
ENSDARG00000104590	CT737123.2			processed_transcript
ENSDARG00000096998	CT737162.1			lincRNA
ENSDARG00000098741	CT737182.1			unprocessed_pseudogene
ENSDARG00000114801	CT867973.1			protein_coding
ENSDARG00000116308	CT867973.2			protein_coding
ENSDARG00000117501	CT955962.3			lincRNA
ENSDARG00000102873	CT956002.2			protein_coding
ENSDARG00000117728	CT956055.1			lincRNA
ENSDARG00000099875	CT956056.1			miRNA
ENSDARG00000098415	CT956093.1			unprocessed_pseudogene
ENSDARG00000096900	CT961047.1			lincRNA
ENSDARG00000092072	CT997819.1			processed_transcript
ENSDARG00000096837	CU013548.1			lincRNA
ENSDARG00000100601	CU019562.1			lincRNA
ENSDARG00000101381	CU019562.2			lincRNA
ENSDARG00000117771	CU019632.1			lincRNA
ENSDARG00000104386	CU019647.1			lincRNA
ENSDARG00000103841	CU024870.1			protein_coding
ENSDARG00000105327	CU062454.1			lincRNA
ENSDARG00000117357	CU062487.1			lincRNA
ENSDARG00000098908	CU062501.1			lincRNA
ENSDARG00000103967	CU062501.2			lincRNA
ENSDARG00000102392	CU062645.1			lincRNA
ENSDARG00000117397	CU062647.1			lincRNA
ENSDARG00000104911	CU074310.1			processed_transcript
ENSDARG00000092880	CU074419.1			processed_transcript
ENSDARG00000086718	CU075735.1			processed_transcript
ENSDARG00000100925	CU104709.1			protein_coding
ENSDARG00000117449	CU104743.1			lincRNA
ENSDARG00000099770	CU104782.1			lincRNA
ENSDARG00000116145	CU137645.1			protein_coding
ENSDARG00000097541	CU137680.1			lincRNA
ENSDARG00000097623	CU137681.2			lincRNA
ENSDARG00000097945	CU137681.4			lincRNA
ENSDARG00000110938	CU137681.5			miRNA
ENSDARG00000117677	CU137681.8			lincRNA
ENSDARG00000093153	CU137717.1			processed_transcript
ENSDARG00000092863	CU138515.1			processed_transcript
ENSDARG00000117784	CU151886.1			lincRNA
ENSDARG00000099426	CU179702.1			unprocessed_pseudogene
ENSDARG00000117564	CU179729.1			lincRNA
ENSDARG00000103081	CU182107.1			protein_coding
ENSDARG00000112651	CU182823.2			protein_coding
ENSDARG00000092388	CU207217.1			antisense
ENSDARG00000113016	CU207245.1			protein_coding
ENSDARG00000117825	CU207269.4			lincRNA
ENSDARG00000094189	CU207281.3			processed_transcript
ENSDARG00000098068	CU207354.2			lincRNA
ENSDARG00000105330	CU210845.1			unprocessed_pseudogene
ENSDARG00000098326	CU280645.1			lincRNA
ENSDARG00000098066	CU302323.1			processed_transcript
ENSDARG00000101202	CU302413.1			processed_pseudogene
ENSDARG00000094317	CU326349.1			processed_transcript
ENSDARG00000096103	CU326364.1			processed_transcript
ENSDARG00000105623	CU329666.1			lincRNA
ENSDARG00000102989	CU394253.1			lincRNA
ENSDARG00000097146	CU459174.1			lincRNA
ENSDARG00000096752	CU459210.1			processed_transcript
ENSDARG00000104624	CU462913.1			protein_coding
ENSDARG00000094547	CU462914.1			processed_transcript
ENSDARG00000102247	CU463038.2			protein_coding
ENSDARG00000092709	CU463109.1			lincRNA
ENSDARG00000117738	CU463109.2			lincRNA
ENSDARG00000117542	CU463284.2			lincRNA
ENSDARG00000092808	CU466285.1			lincRNA
ENSDARG00000099945	CU467646.4			protein_coding
ENSDARG00000100065	CU467837.1			protein_coding
ENSDARG00000103358	CU467856.1			TEC
ENSDARG00000099571	CU468012.2			processed_transcript
ENSDARG00000099594	CU468012.3			unprocessed_pseudogene
ENSDARG00000100950	CU468012.4			processed_transcript
ENSDARG00000096857	CU469362.1			processed_transcript
ENSDARG00000086259	CU469420.1			unprocessed_pseudogene
ENSDARG00000090957	CU469420.2			unprocessed_pseudogene
ENSDARG00000095980	CU469420.3			antisense
ENSDARG00000096149	CU469420.4			antisense
ENSDARG00000096742	CU469493.1			lincRNA
ENSDARG00000096174	CU469524.1			processed_transcript
ENSDARG00000094923	CU469568.2			unprocessed_pseudogene
ENSDARG00000102850	CU469577.1			lincRNA
ENSDARG00000114387	CU499336.2			protein_coding
ENSDARG00000096683	CU565528.1			lincRNA
ENSDARG00000040601	CU570684.1			protein_coding
ENSDARG00000088908	CU570691.1			unprocessed_pseudogene
ENSDARG00000109278	CU570800.2			protein_coding
ENSDARG00000109285	CU570800.3			protein_coding
ENSDARG00000109754	CU570800.4			protein_coding
ENSDARG00000095493	CU570881.1			protein_coding
ENSDARG00000094063	CU570972.1			processed_transcript
ENSDARG00000098815	CU571064.1			lincRNA
ENSDARG00000117795	CU571066.1			lincRNA
ENSDARG00000100041	CU571069.1			lincRNA
ENSDARG00000096770	CU571074.1			lincRNA
ENSDARG00000096317	CU571254.1			processed_pseudogene
ENSDARG00000031534	CU571315.1			protein_coding
ENSDARG00000097048	CU571318.1			lincRNA
ENSDARG00000117718	CU571319.2			lincRNA
ENSDARG00000094666	CU571324.1			processed_transcript
ENSDARG00000097271	CU571382.2			lincRNA
ENSDARG00000097603	CU571382.3			lincRNA
ENSDARG00000110539	CU571382.4			protein_coding
ENSDARG00000113363	CU571384.1			protein_coding
ENSDARG00000093355	CU633785.1			lincRNA
ENSDARG00000091935	CU633804.1			processed_pseudogene
ENSDARG00000100303	CU638714.1			protein_coding
ENSDARG00000103179	CU639397.1			lincRNA
ENSDARG00000096929	CU639412.1			antisense
ENSDARG00000101069	CU651669.1			lincRNA
ENSDARG00000094571	CU652528.1			processed_transcript
ENSDARG00000104131	CU652893.1			lincRNA
ENSDARG00000095081	CU657976.1			lincRNA
ENSDARG00000096419	CU659670.1			lincRNA
ENSDARG00000096723	CU660013.2			lincRNA
ENSDARG00000096785	CU660013.3			lincRNA
ENSDARG00000096803	CU660013.4			lincRNA
ENSDARG00000095850	CU672266.1			antisense
ENSDARG00000097021	CU682780.1			processed_transcript
ENSDARG00000092691	CU682811.1			processed_transcript
ENSDARG00000095858	CU683879.1			processed_transcript
ENSDARG00000115307	CU693440.1			pseudogene
ENSDARG00000093463	CU693484.1			lincRNA
ENSDARG00000097467	CU693502.1			lincRNA
ENSDARG00000104220	CU694197.2			lincRNA
ENSDARG00000093902	CU694380.1			processed_pseudogene
ENSDARG00000117497	CU694380.2			lincRNA
ENSDARG00000100577	CU694481.1			lincRNA
ENSDARG00000091948	CU694486.1			lincRNA
ENSDARG00000095260	CU694757.1			processed_transcript
ENSDARG00000095123	CU694808.1			processed_transcript
ENSDARG00000114460	CU694999.1			protein_coding
ENSDARG00000096154	CU695141.1			lincRNA
ENSDARG00000105469	CU695207.2			lincRNA
ENSDARG00000101591	CU695215.1			processed_transcript
ENSDARG00000097132	CU695222.1			lincRNA
ENSDARG00000117386	CU855799.1			lincRNA
ENSDARG00000097075	CU855801.1			lincRNA
ENSDARG00000117336	CU855948.1			lincRNA
ENSDARG00000099569	CU856423.1			lincRNA
ENSDARG00000098941	CU856520.1			lincRNA
ENSDARG00000101444	CU856523.1			lincRNA
ENSDARG00000095933	CU856621.1			lincRNA
ENSDARG00000095970	CU856621.2			lincRNA
ENSDARG00000098888	CU861459.1			protein_coding
ENSDARG00000097744	CU861501.1			lincRNA
ENSDARG00000104515	CU861667.1			lincRNA
ENSDARG00000096262	CU862078.1			antisense
ENSDARG00000071461	CU896602.1			processed_transcript
ENSDARG00000109863	CU896602.2			protein_coding
ENSDARG00000113786	CU896602.3			protein_coding
ENSDARG00000117030	CU896602.4			protein_coding
ENSDARG00000087901	CU896691.1			protein_coding
ENSDARG00000097611	CU896691.2			processed_transcript
ENSDARG00000109630	CU896691.3			protein_coding
ENSDARG00000095351	CU914776.1			processed_transcript
ENSDARG00000117766	CU915256.2			lincRNA
ENSDARG00000105830	CU915534.1			unprocessed_pseudogene
ENSDARG00000097095	CU927934.2			lincRNA
ENSDARG00000098300	CU928205.1			lincRNA
ENSDARG00000098246	CU928222.2			lincRNA
ENSDARG00000117438	CU929094.1			lincRNA
ENSDARG00000117709	CU929094.2			lincRNA
ENSDARG00000099967	CU929143.1			lincRNA
ENSDARG00000071554	CU929149.1			processed_transcript
ENSDARG00000096610	CU929161.1			processed_transcript
ENSDARG00000117731	CU929171.1			lincRNA
ENSDARG00000099575	CU929203.1			lincRNA
ENSDARG00000100235	CU929203.2			lincRNA
ENSDARG00000117269	CU929241.1			lincRNA
ENSDARG00000100037	CU929317.1			protein_coding
ENSDARG00000105572	CU929416.1			retained_intron
ENSDARG00000114395	CU929458.1			protein_coding
ENSDARG00000100077	CU929568.1			unprocessed_pseudogene
ENSDARG00000104873	CU929568.2			lincRNA
ENSDARG00000105642	CU972454.3			unprocessed_pseudogene
ENSDARG00000105667	CU972454.4			lincRNA
ENSDARG00000101819	CU984583.1			lincRNA
ENSDARG00000113111	DGKD	diacylglycerol kinase delta		protein_coding
ENSDARG00000088287	dre-mir-194b	dre-mir-194b		miRNA
ENSDARG00000083706	dre-mir-2193	dre-mir-2193		miRNA
ENSDARG00000079740	efna2b	ephrin-A2b	ZDB-GENE-141120-2	protein_coding
ENSDARG00000101353	f13b	coagulation factor XIII, B polypeptide	ZDB-GENE-050208-701	protein_coding
ENSDARG00000117281	FO082779.2			lincRNA
ENSDARG00000111783	FO393424.3			protein_coding
ENSDARG00000117328	FO681472.1			lincRNA
ENSDARG00000112601	FO704673.1			protein_coding
ENSDARG00000102488	FO704745.1			lincRNA
ENSDARG00000105309	FO704756.1			lincRNA
ENSDARG00000114910	FO704772.1			pseudogene
ENSDARG00000116076	FO704772.2			protein_coding
ENSDARG00000117638	FO704909.1			lincRNA
ENSDARG00000117775	FO744838.1			lincRNA
ENSDARG00000112433	FO818699.1			protein_coding
ENSDARG00000094938	FO834814.1			processed_transcript
ENSDARG00000116570	FO834825.3			protein_coding
ENSDARG00000105456	FO834831.1			lincRNA
ENSDARG00000117657	FO834866.1			lincRNA
ENSDARG00000117459	FO834903.1			lincRNA
ENSDARG00000115718	FO904836.1			protein_coding
ENSDARG00000113348	FO904868.1			protein_coding
ENSDARG00000090601	FO904898.2			protein_coding
ENSDARG00000117242	FO907118.1			lincRNA
ENSDARG00000102013	FP009765.1			lincRNA
ENSDARG00000117389	FP015860.1			lincRNA
ENSDARG00000097124	FP015862.1			processed_transcript
ENSDARG00000097470	FP015862.2			processed_transcript
ENSDARG00000103048	FP015866.1			lincRNA
ENSDARG00000105517	FP015866.2			lincRNA
ENSDARG00000105534	FP015866.3			lincRNA
ENSDARG00000105662	FP015866.4			lincRNA
ENSDARG00000095376	FP016012.1			processed_transcript
ENSDARG00000093689	FP016018.1			protein_coding
ENSDARG00000097297	FP016018.3			lincRNA
ENSDARG00000111019	FP016018.4			protein_coding
ENSDARG00000093062	FP016056.1			processed_transcript
ENSDARG00000095672	FP016142.1			lincRNA
ENSDARG00000098571	FP016142.2			lincRNA
ENSDARG00000099688	FP016142.3			antisense
ENSDARG00000100605	FP016142.4			lincRNA
ENSDARG00000101845	FP016142.5			lincRNA
ENSDARG00000102454	FP016142.6			lincRNA
ENSDARG00000103059	FP016142.7			lincRNA
ENSDARG00000105248	FP016247.2			processed_transcript
ENSDARG00000097369	FP017274.1			lincRNA
ENSDARG00000091185	FP017295.1			processed_transcript
ENSDARG00000095033	FP067425.1			processed_transcript
ENSDARG00000100154	FP067440.1			lincRNA
ENSDARG00000117338	FP067442.1			lincRNA
ENSDARG00000105810	FP074874.3			lincRNA
ENSDARG00000103434	FP074902.1			lincRNA
ENSDARG00000114702	FP074902.3			lincRNA
ENSDARG00000103941	FP085399.3			processed_transcript
ENSDARG00000104303	FP085399.4			processed_transcript
ENSDARG00000097969	FP089511.1			antisense
ENSDARG00000103110	FP089536.1			lincRNA
ENSDARG00000109804	FP101875.2			protein_coding
ENSDARG00000117421	FP101883.1			lincRNA
ENSDARG00000094004	FP102120.1			processed_transcript
ENSDARG00000093749	FP102171.1			processed_transcript
ENSDARG00000105109	FP102783.1			lincRNA
ENSDARG00000117639	FP102809.1			lincRNA
ENSDARG00000098593	FP102843.1			miRNA
ENSDARG00000097570	FP102921.2			lincRNA
ENSDARG00000103569	FP103005.2			lincRNA
ENSDARG00000095795	FP103048.1			processed_transcript
ENSDARG00000117422	FP103074.1			lincRNA
ENSDARG00000093583	FP236157.1			lincRNA
ENSDARG00000105402	FP236327.1			lincRNA
ENSDARG00000117367	FP236457.1			lincRNA
ENSDARG00000117289	FP236542.2			lincRNA
ENSDARG00000099616	FP236734.1			lincRNA
ENSDARG00000096356	FP236809.1			processed_transcript
ENSDARG00000097649	FP243382.1			lincRNA
ENSDARG00000103528	FP243383.1			TEC
ENSDARG00000117680	FP245452.1			lincRNA
ENSDARG00000117365	FP245526.1			lincRNA
ENSDARG00000105356	FP325124.1			lincRNA
ENSDARG00000097399	FP340271.1			lincRNA
ENSDARG00000117292	FP340497.1			lincRNA
ENSDARG00000096700	FP565451.1			lincRNA
ENSDARG00000106858	FP565451.2			miRNA
ENSDARG00000099503	FQ311879.2			lincRNA
ENSDARG00000100672	FQ311920.1			protein_coding
ENSDARG00000099473	FQ312013.1			lincRNA
ENSDARG00000117739	FQ312017.1			lincRNA
ENSDARG00000101927	FQ377605.1			lincRNA
ENSDARG00000117391	FQ377662.1			lincRNA
ENSDARG00000117563	FQ377991.1			lincRNA
ENSDARG00000101048	FQ790208.1			lincRNA
ENSDARG00000095609	ftr60	finTRIM family, member 60	ZDB-GENE-160628-2	protein_coding
ENSDARG00000045957	gpr65	G protein-coupled receptor 65	ZDB-GENE-120709-81	protein_coding
ENSDARG00000096351	ighj1-1	immunoglobulin heavy joining 1-1	ZDB-GENE-040514-50	protein_coding
ENSDARG00000096292	ighj1-2	immunoglobulin heavy joining 1-2	ZDB-GENE-040514-51	protein_coding
ENSDARG00000096321	ighj2-1	immunoglobulin heavy joining 2-1	ZDB-GENE-040514-55	protein_coding
ENSDARG00000113829	ighj2-2	immunoglobulin heavy joining 2-2	ZDB-GENE-040514-56	protein_coding
ENSDARG00000096366	ighj2-3	ighj2-3	ZDB-GENE-041001-94	protein_coding
ENSDARG00000114780	ighj2-4	ighj2-4	ZDB-GENE-041001-93	protein_coding
ENSDARG00000096330	ighj2-5	ighj2-5	ZDB-GENE-041001-95	protein_coding
ENSDARG00000096387	ighv1-1	immunoglobulin heavy variable 1-1	ZDB-GENE-030924-1	protein_coding
ENSDARG00000096350	ighv1-2	immunoglobulin heavy variable 1-2	ZDB-GENE-030924-2	protein_coding
ENSDARG00000096243	ighv1-3	immunoglobulin heavy variable 1-3	ZDB-GENE-040514-7	protein_coding
ENSDARG00000096355	ighv1-4	immunoglobulin heavy variable 1-4	ZDB-GENE-040514-1	protein_coding
ENSDARG00000096316	ighv10-1	immunoglobulin heavy variable 10-1	ZDB-GENE-040514-34	protein_coding
ENSDARG00000096395	ighv11-1	immunoglobulin heavy variable 11-1	ZDB-GENE-040514-36	protein_coding
ENSDARG00000096408	ighv11-2	immunoglobulin heavy variable 11-2	ZDB-GENE-040514-37	protein_coding
ENSDARG00000096372	ighv13-2	immunoglobulin heavy variable 13-2	ZDB-GENE-040514-41	protein_coding
ENSDARG00000096418	ighv14-1	immunoglobulin heavy variable 14-1	ZDB-GENE-040514-42	protein_coding
ENSDARG00000096424	ighv2-2	immunoglobulin heavy variable 2-2	ZDB-GENE-030924-5	protein_coding
ENSDARG00000096376	ighv2-3	immunoglobulin heavy variable 2-3	ZDB-GENE-040514-3	protein_coding
ENSDARG00000096357	ighv3-2	immunoglobulin heavy variable 3-2	ZDB-GENE-030924-6	protein_coding
ENSDARG00000096394	ighv4-3	immunoglobulin heavy variable 4-3	ZDB-GENE-040514-9	protein_coding
ENSDARG00000096333	ighv4-6	immunoglobulin heavy variable 4-6	ZDB-GENE-030924-7	protein_coding
ENSDARG00000096268	ighv4-7	immunoglobulin heavy variable 4-7	ZDB-GENE-040514-12	protein_coding
ENSDARG00000096289	ighv4-8	immunoglobulin heavy variable 4-8	ZDB-GENE-040514-13	protein_coding
ENSDARG00000096326	ighv4-9	immunoglobulin heavy variable 4-9	ZDB-GENE-040514-14	protein_coding
ENSDARG00000096337	ighv5-1	immunoglobulin heavy variable 5-1	ZDB-GENE-040514-15	protein_coding
ENSDARG00000096267	ighv5-2	immunoglobulin heavy variable 5-2	ZDB-GENE-040514-16	protein_coding
ENSDARG00000096308	ighv5-4	immunoglobulin heavy variable 5-4	ZDB-GENE-040514-18	protein_coding
ENSDARG00000096342	ighv5-5	immunoglobulin heavy variable 5-5	ZDB-GENE-040514-19	protein_coding
ENSDARG00000096244	ighv5-7	immunoglobulin heavy variable 5-7	ZDB-GENE-040514-21	protein_coding
ENSDARG00000096318	ighv5-8	immunoglobulin heavy variable 5-8	ZDB-GENE-040514-22	protein_coding
ENSDARG00000096276	ighv6-1	immunoglobulin heavy variable 6-1	ZDB-GENE-040514-23	protein_coding
ENSDARG00000096303	ighv6-2	immunoglobulin heavy variable 6-2	ZDB-GENE-040514-24	protein_coding
ENSDARG00000096241	ighv7-1	immunoglobulin heavy variable 7-1	ZDB-GENE-040514-25	protein_coding
ENSDARG00000096255	ighv8-1	immunoglobulin heavy variable 8-1	ZDB-GENE-040514-26	protein_coding
ENSDARG00000096340	ighv8-2	immunoglobulin heavy variable 8-2	ZDB-GENE-040514-27	protein_coding
ENSDARG00000114819	ighv8-3	immunoglobulin heavy variable 8-3	ZDB-GENE-040514-28	protein_coding
ENSDARG00000109214	ighv8-4	immunoglobulin heavy variable 8-4	ZDB-GENE-040514-29	protein_coding
ENSDARG00000096430	ighv9-1	immunoglobulin heavy variable 9-1	ZDB-GENE-040514-30	protein_coding
ENSDARG00000113309	ighv9-2	immunoglobulin heavy variable 9-2	ZDB-GENE-040514-31	protein_coding
ENSDARG00000096386	ighv9-3	immunoglobulin heavy variable 9-3	ZDB-GENE-040514-32	protein_coding
ENSDARG00000113059	ighv9-4	immunoglobulin heavy variable 9-4	ZDB-GENE-040514-33	protein_coding
ENSDARG00000096280	ighz	immunoglobulin heavy constant zeta	ZDB-GENE-040513-8	protein_coding
ENSDARG00000093272	igic1s1	immunoglobulin light iota constant 1, s1	ZDB-GENE-051013-12	protein_coding
ENSDARG00000078975	igl1c3	immunoglobulin light 1 constant 3	ZDB-GENE-111021-11	protein_coding
ENSDARG00000110046	igl3v1	immunoglobulin light 3 variable 1	ZDB-GENE-060503-880	protein_coding
ENSDARG00000078763	igl3v3	immunoglobulin light 3 variable 3	ZDB-GENE-060503-503	protein_coding
ENSDARG00000111761	igl3v4	immunoglobulin light 3 variable 4	ZDB-GENE-060503-598	protein_coding
ENSDARG00000051760	igl4v10	immunoglobulin light 4 variable 10	ZDB-GENE-051013-5	protein_coding
ENSDARG00000019591	igl4v9	immunoglobulin light 4 variable 9	ZDB-GENE-051013-8	protein_coding
ENSDARG00000117579	LO016985.1			lincRNA
ENSDARG00000117410	LO017643.1			lincRNA
ENSDARG00000117204	LO017725.1			protein_coding
ENSDARG00000117499	LO017793.1			lincRNA
ENSDARG00000112024	LO017821.1			protein_coding
ENSDARG00000117782	LO017841.1			lincRNA
ENSDARG00000117800	LO017847.1			lincRNA
ENSDARG00000117287	LO017955.1			lincRNA
ENSDARG00000117631	LO017955.2			lincRNA
ENSDARG00000117737	LO018022.2			lincRNA
ENSDARG00000117310	LO018104.1			lincRNA
ENSDARG00000111040	LO018128.1			protein_coding
ENSDARG00000117433	LO018256.1			lincRNA
ENSDARG00000117584	LO018296.1			lincRNA
ENSDARG00000117777	LO018400.1			lincRNA
ENSDARG00000112343	LO018437.1			protein_coding
ENSDARG00000105181	LO018597.1			protein_coding
ENSDARG00000113965	LO018597.2			protein_coding
ENSDARG00000102208	LO018612.1			protein_coding
ENSDARG00000117267	LO018644.1			lincRNA
ENSDARG00000115208	LO018680.1			protein_coding
ENSDARG00000103060	ly6m7	lymphocyte antigen 6 family member M7	ZDB-GENE-131121-290	protein_coding
ENSDARG00000091992	mrap	melanocortin 2 receptor accessory protein	ZDB-GENE-060503-387	protein_coding
ENSDARG00000028659	ms4a17c.2	membrane-spanning 4-domains, subfamily A, member 17c.2	ZDB-GENE-080829-10	protein_coding
ENSDARG00000080128	NC_002333.1			Mt_tRNA
ENSDARG00000081443	NC_002333.10			Mt_tRNA
ENSDARG00000081475	NC_002333.11			Mt_tRNA
ENSDARG00000081938	NC_002333.13			Mt_tRNA
ENSDARG00000082753	NC_002333.17			Mt_rRNA
ENSDARG00000082789	NC_002333.18			Mt_tRNA
ENSDARG00000083046	NC_002333.19			Mt_tRNA
ENSDARG00000083312	NC_002333.21			Mt_tRNA
ENSDARG00000083480	NC_002333.23			Mt_tRNA
ENSDARG00000080337	NC_002333.4			Mt_rRNA
ENSDARG00000080401	NC_002333.5			Mt_tRNA
ENSDARG00000080630	NC_002333.6			Mt_tRNA
ENSDARG00000081369	NC_002333.9			Mt_tRNA
ENSDARG00000075476	nlrp15	NACHT, LRR and PYD domains-containing protein 15	ZDB-GENE-050208-473	protein_coding
ENSDARG00000094913	or133-2	odorant receptor, family H, subfamily 133, member 2	ZDB-GENE-070806-35	protein_coding
ENSDARG00000105798	or133-3	odorant receptor, family H, subfamily 133, member 3	ZDB-GENE-070806-36	protein_coding
ENSDARG00000105768	or133-4	odorant receptor, family H, subfamily 133, member 4	ZDB-GENE-070806-37	protein_coding
ENSDARG00000105735	or133-7	odorant receptor, family H, subfamily 133, member 7	ZDB-GENE-070806-40	protein_coding
ENSDARG00000093273	or137-6	odorant receptor, family H, subfamily 137, member 6	ZDB-GENE-160627-1	protein_coding
ENSDARG00000116518	pcnx3	pecanex 3	ZDB-GENE-091112-9	protein_coding
ENSDARG00000111316	pimr11	Pim proto-oncogene, serine/threonine kinase, related 11	ZDB-GENE-131125-78	protein_coding
ENSDARG00000110832	pimr12	Pim proto-oncogene, serine/threonine kinase, related 12	ZDB-GENE-131121-65	protein_coding
ENSDARG00000097870	pimr13	Pim proto-oncogene, serine/threonine kinase, related 13	ZDB-GENE-131120-23	protein_coding
ENSDARG00000094145	pimr143	Pim proto-oncogene, serine/threonine kinase, related 143	ZDB-GENE-070912-602	protein_coding
ENSDARG00000112602	pimr15	Pim proto-oncogene, serine/threonine kinase, related 15	ZDB-GENE-131120-63	protein_coding
ENSDARG00000110797	pimr16	Pim proto-oncogene, serine/threonine kinase, related 16	ZDB-GENE-131120-60	protein_coding
ENSDARG00000114455	pimr164	Pim proto-oncogene, serine/threonine kinase, related 164	ZDB-GENE-120214-11	protein_coding
ENSDARG00000116090	pimr17	Pim proto-oncogene, serine/threonine kinase, related 17	ZDB-GENE-131125-89	protein_coding
ENSDARG00000094885	pimr178	Pim proto-oncogene, serine/threonine kinase, related 178	ZDB-GENE-090312-160	protein_coding
ENSDARG00000115685	pimr18	Pim proto-oncogene, serine/threonine kinase, related 18	ZDB-GENE-131125-87	protein_coding
ENSDARG00000068145	pimr180	Pim proto-oncogene, serine/threonine kinase, related 180	ZDB-GENE-141222-35	protein_coding
ENSDARG00000052319	pimr196	Pim proto-oncogene, serine/threonine kinase, related 196	ZDB-GENE-070705-328	protein_coding
ENSDARG00000100970	pimr197	Pim proto-oncogene, serine/threonine kinase, related 197	ZDB-GENE-070705-327	protein_coding
ENSDARG00000104972	pimr199	Pim proto-oncogene, serine/threonine kinase, related 199	ZDB-GENE-131122-36	protein_coding
ENSDARG00000092697	pimr200	Pim proto-oncogene, serine/threonine kinase, related 200	ZDB-GENE-070705-80	protein_coding
ENSDARG00000092561	pimr201	Pim proto-oncogene, serine/threonine kinase, related 201	ZDB-GENE-060526-91	protein_coding
ENSDARG00000103910	pimr202	Pim proto-oncogene, serine/threonine kinase, related 202	ZDB-GENE-141222-84	protein_coding
ENSDARG00000116762	pimr204	Pim proto-oncogene, serine/threonine kinase, related 204	ZDB-GENE-141216-237	protein_coding
ENSDARG00000096237	pimr206	Pim proto-oncogene, serine/threonine kinase, related 206	ZDB-GENE-120215-1	protein_coding
ENSDARG00000099655	pimr207	Pim proto-oncogene, serine/threonine kinase, related 207	ZDB-GENE-131127-80	protein_coding
ENSDARG00000091845	pimr21	Pim proto-oncogene, serine/threonine kinase, related 21	ZDB-GENE-131126-21	protein_coding
ENSDARG00000078312	pimr22	Pim proto-oncogene, serine/threonine kinase, related 22	ZDB-GENE-131120-85	protein_coding
ENSDARG00000116676	pimr25	Pim proto-oncogene, serine/threonine kinase, related 25	ZDB-GENE-131125-30	protein_coding
ENSDARG00000097531	pimr26	Pim proto-oncogene, serine/threonine kinase, related 26	ZDB-GENE-131120-6	protein_coding
ENSDARG00000116567	pimr3	Pim proto-oncogene, serine/threonine kinase, related 3	ZDB-GENE-131120-47	protein_coding
ENSDARG00000113584	pimr30	Pim proto-oncogene, serine/threonine kinase, related 30	ZDB-GENE-131120-169	protein_coding
ENSDARG00000111303	pimr4	Pim proto-oncogene, serine/threonine kinase, related 4	ZDB-GENE-131125-77	protein_coding
ENSDARG00000097837	pimr40	Pim proto-oncogene, serine/threonine kinase, related 40	ZDB-GENE-131120-45	protein_coding
ENSDARG00000116830	pimr41	Pim proto-oncogene, serine/threonine kinase, related 41	ZDB-GENE-131120-74	protein_coding
ENSDARG00000111070	pimr44	Pim proto-oncogene, serine/threonine kinase, related 44	ZDB-GENE-131120-66	protein_coding
ENSDARG00000113502	pimr45	Pim proto-oncogene, serine/threonine kinase, related 45	ZDB-GENE-131125-88	protein_coding
ENSDARG00000114433	pimr5	Pim proto-oncogene, serine/threonine kinase, related 5	ZDB-GENE-131125-73	protein_coding
ENSDARG00000115519	pimr6	Pim proto-oncogene, serine/threonine kinase, related 6	ZDB-GENE-131125-84	protein_coding
ENSDARG00000093878	pimr69	Pim proto-oncogene, serine/threonine kinase, related 69	ZDB-GENE-050208-636	protein_coding
ENSDARG00000114139	pimr86	Pim proto-oncogene, serine/threonine kinase, related 86	ZDB-GENE-060503-865	protein_coding
ENSDARG00000092513	pku300	pku300	ZDB-GENE-070705-222	protein_coding
ENSDARG00000055177	pxdc1a	PX domain containing 1a	ZDB-GENE-070912-381	protein_coding
ENSDARG00000115847	RF00002			rRNA
ENSDARG00000117206	RF00003			snRNA
ENSDARG00000117035	RF00004			snRNA
ENSDARG00000116538	RF00006			misc_RNA
ENSDARG00000080745	RF00007	RNA, U12 small nuclear 2, pseudogene		snRNA
ENSDARG00000116958	RF00012			snoRNA
ENSDARG00000116853	RF00015			snRNA
ENSDARG00000117197	RF00017			misc_RNA
ENSDARG00000100903	RF00019			misc_RNA
ENSDARG00000116708	RF00020			snRNA
ENSDARG00000117208	RF00026			snRNA
ENSDARG00000080987	RF00030	RNA component of mitochondrial RNA processing endoribonuclease		ribozyme
ENSDARG00000083638	RF00066			snRNA
ENSDARG00000115663	RF00096			snoRNA
ENSDARG00000083675	RF00100			misc_RNA
ENSDARG00000081972	RF00288	small nucleolar RNA, C/D box 7		snoRNA
ENSDARG00000105169	RF00582	small Cajal body-specific RNA 14		scaRNA
ENSDARG00000115531	RF00618			snRNA
ENSDARG00000083060	RF00619			snRNA
ENSDARG00000116149	RF01684			sRNA
ENSDARG00000117129	RF01848			snoRNA
ENSDARG00000103499	RF02041			misc_RNA
ENSDARG00000101937	RF02209			misc_RNA
ENSDARG00000104137	RF02250			misc_RNA
ENSDARG00000102334	SH3RF3	si:ch211-124n19.2	ZDB-GENE-081104-105	protein_coding
ENSDARG00000103252	si:busm1-169i8.11	si:busm1-169i8.11	ZDB-GENE-040724-188	protein_coding
ENSDARG00000105486	si:cabz01040626.2	si:cabz01040626.2	ZDB-GENE-160113-147	protein_coding
ENSDARG00000105797	si:ch1073-166e24.4	si:ch1073-166e24.4	ZDB-GENE-131121-386	protein_coding
ENSDARG00000093367	si:ch1073-272j17.3	si:ch1073-272j17.3	ZDB-GENE-100922-135	protein_coding
ENSDARG00000092421	si:ch1073-394i4.1	si:ch1073-394i4.1	ZDB-GENE-100922-74	protein_coding
ENSDARG00000095861	si:ch1073-441p17.1	si:ch1073-441p17.1	ZDB-GENE-110411-140	protein_coding
ENSDARG00000101485	si:ch1073-469d17.2	si:ch1073-469d17.2	ZDB-GENE-141216-487	protein_coding
ENSDARG00000097776	si:ch1073-80i24.3	si:ch1073-80i24.3	ZDB-GENE-131121-622	protein_coding
ENSDARG00000103583	si:ch211-106g8.17	si:ch211-106g8.17	ZDB-GENE-141212-75	TR_V_gene
ENSDARG00000100801	si:ch211-106g8.20	si:ch211-106g8.20	ZDB-GENE-141212-207	TR_V_gene
ENSDARG00000099074	si:ch211-106g8.54	si:ch211-106g8.54	ZDB-GENE-141212-51	TR_V_gene
ENSDARG00000101709	si:ch211-106g8.56	si:ch211-106g8.56	ZDB-GENE-141212-115	TR_V_gene
ENSDARG00000100541	si:ch211-106g8.62	si:ch211-106g8.62	ZDB-GENE-141212-61	TR_V_gene
ENSDARG00000097099	si:ch211-108d22.1	si:ch211-108d22.1	ZDB-GENE-131126-61	protein_coding
ENSDARG00000070215	si:ch211-120e1.1	si:ch211-120e1.1	ZDB-GENE-070705-20	protein_coding
ENSDARG00000105447	si:ch211-129p13.1	si:ch211-129p13.1	ZDB-GENE-160113-47	protein_coding
ENSDARG00000098013	si:ch211-130m23.5	si:ch211-130m23.5	ZDB-GENE-131121-298	protein_coding
ENSDARG00000101786	si:ch211-134a4.6	si:ch211-134a4.6	ZDB-GENE-131127-380	protein_coding
ENSDARG00000088867	si:ch211-135n15.1	si:ch211-135n15.1	ZDB-GENE-131127-408	protein_coding
ENSDARG00000097917	si:ch211-137j23.7	si:ch211-137j23.7	ZDB-GENE-131121-482	protein_coding
ENSDARG00000053938	si:ch211-137j23.8	si:ch211-137j23.8	ZDB-GENE-131121-611	protein_coding
ENSDARG00000097372	si:ch211-139d20.3	si:ch211-139d20.3	ZDB-GENE-131127-287	protein_coding
ENSDARG00000097668	si:ch211-139l2.1	si:ch211-139l2.1	ZDB-GENE-131127-491	protein_coding
ENSDARG00000102884	si:ch211-145h19.5	si:ch211-145h19.5	ZDB-GENE-110914-112	protein_coding
ENSDARG00000097275	si:ch211-147g22.4	si:ch211-147g22.4	ZDB-GENE-131121-226	protein_coding
ENSDARG00000045157	si:ch211-147h1.4	si:ch211-147h1.4	ZDB-GENE-040724-228	protein_coding
ENSDARG00000088493	si:ch211-149k12.3	si:ch211-149k12.3	ZDB-GENE-131127-504	protein_coding
ENSDARG00000095420	si:ch211-14a11.1	si:ch211-14a11.1	ZDB-GENE-050420-219	protein_coding
ENSDARG00000113501	si:ch211-14p21.4	si:ch211-14p21.4	ZDB-GENE-070912-95	protein_coding
ENSDARG00000096834	si:ch211-155k24.9	si:ch211-155k24.9	ZDB-GENE-131127-51	protein_coding
ENSDARG00000086518	si:ch211-155o21.3	si:ch211-155o21.3	ZDB-GENE-121214-24	protein_coding
ENSDARG00000096567	si:ch211-155o21.4	si:ch211-155o21.4	ZDB-GENE-121214-169	protein_coding
ENSDARG00000100771	si:ch211-160d14.15	si:ch211-160d14.15	ZDB-GENE-141216-220	protein_coding
ENSDARG00000096384	si:ch211-162i14.1	si:ch211-162i14.1	ZDB-GENE-120215-244	protein_coding
ENSDARG00000095555	si:ch211-163g19.2	si:ch211-163g19.2	ZDB-GENE-090313-55	protein_coding
ENSDARG00000109574	si:ch211-165a10.1	si:ch211-165a10.1	ZDB-GENE-090312-44	protein_coding
ENSDARG00000111029	si:ch211-165a10.10	si:ch211-165a10.10	ZDB-GENE-141212-255	protein_coding
ENSDARG00000104249	si:ch211-165a10.11	si:ch211-165a10.11	ZDB-GENE-141212-330	protein_coding
ENSDARG00000116661	si:ch211-165a10.3	si:ch211-165a10.3	ZDB-GENE-090312-95	protein_coding
ENSDARG00000112750	si:ch211-165a10.5	si:ch211-165a10.5	ZDB-GENE-090312-14	protein_coding
ENSDARG00000105108	si:ch211-165a10.8	si:ch211-165a10.8	ZDB-GENE-141212-298	protein_coding
ENSDARG00000104759	si:ch211-165a10.9	si:ch211-165a10.9	ZDB-GENE-141212-292	protein_coding
ENSDARG00000097770	si:ch211-167j9.4	si:ch211-167j9.4	ZDB-GENE-131121-196	protein_coding
ENSDARG00000101577	si:ch211-172l8.4	si:ch211-172l8.4	ZDB-GENE-131127-224	protein_coding
ENSDARG00000093015	si:ch211-174j14.2	si:ch211-174j14.2	ZDB-GENE-050419-63	protein_coding
ENSDARG00000100900	si:ch211-183d5.2	si:ch211-183d5.2	ZDB-GENE-141216-406	protein_coding
ENSDARG00000099159	si:ch211-186j3.3	si:ch211-186j3.3	ZDB-GENE-141216-442	protein_coding
ENSDARG00000095756	si:ch211-190k17.19	si:ch211-190k17.19	ZDB-GENE-070912-167	protein_coding
ENSDARG00000094059	si:ch211-191j22.7	si:ch211-191j22.7	ZDB-GENE-091204-56	protein_coding
ENSDARG00000092574	si:ch211-198d23.1	si:ch211-198d23.1	ZDB-GENE-081104-163	protein_coding
ENSDARG00000113096	si:ch211-1n9.6	si:ch211-1n9.6	ZDB-GENE-090313-70	protein_coding
ENSDARG00000102713	si:ch211-205a14.1	si:ch211-205a14.1	ZDB-GENE-050420-271	protein_coding
ENSDARG00000097941	si:ch211-207d10.2	si:ch211-207d10.2	ZDB-GENE-131127-573	protein_coding
ENSDARG00000101977	si:ch211-209n20.59	si:ch211-209n20.59	ZDB-GENE-120709-58	protein_coding
ENSDARG00000102931	si:ch211-212k5.3	si:ch211-212k5.3	ZDB-GENE-110914-156	protein_coding
ENSDARG00000093233	si:ch211-215d8.2	si:ch211-215d8.2	ZDB-GENE-050419-248	protein_coding
ENSDARG00000098106	si:ch211-215e19.8	si:ch211-215e19.8	ZDB-GENE-070705-106	protein_coding
ENSDARG00000104072	si:ch211-215j19.12	si:ch211-215j19.12	ZDB-GENE-141212-103	protein_coding
ENSDARG00000103556	si:ch211-218g23.6	si:ch211-218g23.6	ZDB-GENE-141216-449	protein_coding
ENSDARG00000044336	si:ch211-218m3.16	si:ch211-218m3.16	ZDB-GENE-091116-19	protein_coding
ENSDARG00000106963	si:ch211-218m3.19	si:ch211-218m3.19	ZDB-GENE-091116-93	protein_coding
ENSDARG00000092262	si:ch211-220m6.4	si:ch211-220m6.4	ZDB-GENE-081104-183	protein_coding
ENSDARG00000094425	si:ch211-222m18.4	si:ch211-222m18.4	ZDB-GENE-050419-64	protein_coding
ENSDARG00000026864	si:ch211-226m16.3	si:ch211-226m16.3	ZDB-GENE-040724-8	protein_coding
ENSDARG00000094305	si:ch211-226o13.3	si:ch211-226o13.3	ZDB-GENE-110914-139	protein_coding
ENSDARG00000100414	si:ch211-227e10.2	si:ch211-227e10.2	ZDB-GENE-050419-8	protein_coding
ENSDARG00000115299	si:ch211-227e10.3	si:ch211-227e10.3	ZDB-GENE-050420-291	protein_coding
ENSDARG00000096917	si:ch211-227m13.1	si:ch211-227m13.1	ZDB-GENE-131121-45	protein_coding
ENSDARG00000093422	si:ch211-229b6.1	si:ch211-229b6.1	ZDB-GENE-060503-311	protein_coding
ENSDARG00000096362	si:ch211-229c8.14	si:ch211-229c8.14	ZDB-GENE-120214-20	protein_coding
ENSDARG00000095101	si:ch211-229g14.3	si:ch211-229g14.3	ZDB-GENE-081104-187	protein_coding
ENSDARG00000104008	si:ch211-232d10.3	si:ch211-232d10.3	ZDB-GENE-081103-4	protein_coding
ENSDARG00000095730	si:ch211-234p6.9	si:ch211-234p6.9	ZDB-GENE-060503-33	protein_coding
ENSDARG00000097665	si:ch211-235m3.10	si:ch211-235m3.10	ZDB-GENE-131127-468	protein_coding
ENSDARG00000115284	si:ch211-238p8.10	si:ch211-238p8.10	ZDB-GENE-091117-24	protein_coding
ENSDARG00000115263	si:ch211-238p8.18	si:ch211-238p8.18	ZDB-GENE-091117-19	protein_coding
ENSDARG00000086732	si:ch211-238p8.24	si:ch211-238p8.24	ZDB-GENE-091118-22	protein_coding
ENSDARG00000103700	si:ch211-239d6.2	si:ch211-239d6.2	ZDB-GENE-141216-439	protein_coding
ENSDARG00000097681	si:ch211-244k5.1	si:ch211-244k5.1	ZDB-GENE-131127-43	protein_coding
ENSDARG00000099330	si:ch211-246b8.5	si:ch211-246b8.5	ZDB-GENE-070705-140	protein_coding
ENSDARG00000096467	si:ch211-246n15.2	si:ch211-246n15.2	ZDB-GENE-120703-24	protein_coding
ENSDARG00000096274	si:ch211-251g8.5	si:ch211-251g8.5	ZDB-GENE-120215-224	protein_coding
ENSDARG00000097566	si:ch211-256e16.10	si:ch211-256e16.10	ZDB-GENE-131121-244	protein_coding
ENSDARG00000086950	si:ch211-269k10.2	si:ch211-269k10.2	ZDB-GENE-131120-171	protein_coding
ENSDARG00000104269	si:ch211-271d10.2	si:ch211-271d10.2	ZDB-GENE-141212-343	protein_coding
ENSDARG00000092167	si:ch211-272h9.5	si:ch211-272h9.5	ZDB-GENE-070705-167	protein_coding
ENSDARG00000096398	si:ch211-276a17.5	si:ch211-276a17.5	ZDB-GENE-120215-248	protein_coding
ENSDARG00000105377	si:ch211-277c7.6	si:ch211-277c7.6	ZDB-GENE-160114-45	protein_coding
ENSDARG00000086282	si:ch211-282j17.5	si:ch211-282j17.5	ZDB-GENE-041210-288	protein_coding
ENSDARG00000093591	si:ch211-282k23.2	si:ch211-282k23.2	ZDB-GENE-050420-314	protein_coding
ENSDARG00000078489	si:ch211-284d12.3	si:ch211-284d12.3	ZDB-GENE-070912-280	protein_coding
ENSDARG00000091997	si:ch211-284e13.11	si:ch211-284e13.11	ZDB-GENE-060526-157	protein_coding
ENSDARG00000094928	si:ch211-53m15.2	si:ch211-53m15.2	ZDB-GENE-100922-24	protein_coding
ENSDARG00000095927	si:ch211-57m13.1	si:ch211-57m13.1	ZDB-GENE-090312-43	protein_coding
ENSDARG00000095953	si:ch211-57m13.6	si:ch211-57m13.6	ZDB-GENE-110411-143	protein_coding
ENSDARG00000092740	si:ch211-57m13.7	si:ch211-57m13.7	ZDB-GENE-110411-107	protein_coding
ENSDARG00000078271	si:ch211-57m13.8	si:ch211-57m13.8	ZDB-GENE-110411-238	protein_coding
ENSDARG00000098440	si:ch211-62a1.4	si:ch211-62a1.4	ZDB-GENE-141222-41	protein_coding
ENSDARG00000112300	si:ch211-63i20.3	si:ch211-63i20.3	ZDB-GENE-141216-201	protein_coding
ENSDARG00000095990	si:ch211-64i20.5_2	si:ch211-64i20.5_2	ZDB-GENE-110914-141	protein_coding
ENSDARG00000079155	si:ch211-67f13.8	si:ch211-67f13.8	ZDB-GENE-090312-114	protein_coding
ENSDARG00000098979	si:ch211-76m11.15	si:ch211-76m11.15	ZDB-GENE-110411-136	protein_coding
ENSDARG00000116692	si:ch211-79g12.1	si:ch211-79g12.1	ZDB-GENE-110914-69	protein_coding
ENSDARG00000075022	si:ch211-93e11.8	si:ch211-93e11.8	ZDB-GENE-121214-283	protein_coding
ENSDARG00000092842	si:ch211-93g21.2	si:ch211-93g21.2	ZDB-GENE-060503-799	protein_coding
ENSDARG00000092580	si:ch211-95j8.3	si:ch211-95j8.3	ZDB-GENE-091204-307	protein_coding
ENSDARG00000093432	si:ch211-9n13.3	si:ch211-9n13.3	ZDB-GENE-060503-800	protein_coding
ENSDARG00000099867	si:ch73-103b2.1	si:ch73-103b2.1	ZDB-GENE-110408-42	protein_coding
ENSDARG00000096505	si:ch73-103l1.2	si:ch73-103l1.2	ZDB-GENE-121214-226	protein_coding
ENSDARG00000103509	si:ch73-106n3.2	si:ch73-106n3.2	ZDB-GENE-100922-267	protein_coding
ENSDARG00000040902	si:ch73-113g13.1	si:ch73-113g13.1	ZDB-GENE-091204-462	protein_coding
ENSDARG00000056506	si:ch73-113g13.2	si:ch73-113g13.2	ZDB-GENE-091204-438	protein_coding
ENSDARG00000094601	si:ch73-113g13.3	si:ch73-113g13.3	ZDB-GENE-091204-475	protein_coding
ENSDARG00000109615	si:ch73-129a22.11	si:ch73-129a22.11	ZDB-GENE-100921-68	protein_coding
ENSDARG00000101686	si:ch73-171o20.2	si:ch73-171o20.2	ZDB-GENE-141212-363	protein_coding
ENSDARG00000018301	si:ch73-186j5.2	si:ch73-186j5.2	ZDB-GENE-070705-214	protein_coding
ENSDARG00000101367	si:ch73-193i22.1	si:ch73-193i22.1	ZDB-GENE-121214-266	protein_coding
ENSDARG00000102574	si:ch73-21d24.1	si:ch73-21d24.1	ZDB-GENE-141216-244	protein_coding
ENSDARG00000093336	si:ch73-249k16.4	si:ch73-249k16.4	ZDB-GENE-091204-157	protein_coding
ENSDARG00000097420	si:ch73-250a16.5	si:ch73-250a16.5	ZDB-GENE-131121-255	protein_coding
ENSDARG00000094604	si:ch73-256j6.3	si:ch73-256j6.3	ZDB-GENE-070705-224	protein_coding
ENSDARG00000095398	si:ch73-256j6.6	si:ch73-256j6.6	ZDB-GENE-070705-226	protein_coding
ENSDARG00000095975	si:ch73-261i21.2	si:ch73-261i21.2	ZDB-GENE-110411-164	protein_coding
ENSDARG00000096207	si:ch73-263o4.3	si:ch73-263o4.3	ZDB-GENE-110914-192	protein_coding
ENSDARG00000101501	si:ch73-305o9.3	si:ch73-305o9.3	ZDB-GENE-141216-475	protein_coding
ENSDARG00000061672	si:ch73-334d15.1	si:ch73-334d15.1	ZDB-GENE-091118-35	protein_coding
ENSDARG00000105269	si:ch73-338d8.5	si:ch73-338d8.5	ZDB-GENE-141212-126	protein_coding
ENSDARG00000098338	si:ch73-340n8.4	si:ch73-340n8.4	ZDB-GENE-141216-448	protein_coding
ENSDARG00000094357	si:ch73-343l4.1	si:ch73-343l4.1	ZDB-GENE-090313-153	protein_coding
ENSDARG00000092502	si:ch73-343l4.3	si:ch73-343l4.3	ZDB-GENE-090313-155	protein_coding
ENSDARG00000104422	si:ch73-34h11.1	si:ch73-34h11.1	ZDB-GENE-131120-162	protein_coding
ENSDARG00000105564	si:ch73-367j5.3	si:ch73-367j5.3	ZDB-GENE-141216-95	protein_coding
ENSDARG00000091388	si:ch73-380l3.5	si:ch73-380l3.5	ZDB-GENE-131126-67	protein_coding
ENSDARG00000091909	si:ch73-59c19.1	si:ch73-59c19.1	ZDB-GENE-100922-247	protein_coding
ENSDARG00000101609	si:dkey-109a10.2	si:dkey-109a10.2	ZDB-GENE-141212-404	protein_coding
ENSDARG00000094811	si:dkey-111i23.1	si:dkey-111i23.1	ZDB-GENE-070912-351	protein_coding
ENSDARG00000097521	si:dkey-111k8.5	si:dkey-111k8.5	ZDB-GENE-131125-101	protein_coding
ENSDARG00000095150	si:dkey-114c15.5	si:dkey-114c15.5	ZDB-GENE-060531-72	protein_coding
ENSDARG00000053928	si:dkey-117a8.3	si:dkey-117a8.3	ZDB-GENE-131121-476	protein_coding
ENSDARG00000096654	si:dkey-119m7.8	si:dkey-119m7.8	ZDB-GENE-121214-235	protein_coding
ENSDARG00000040901	si:dkey-11d18.4	si:dkey-11d18.4	ZDB-GENE-091204-474	protein_coding
ENSDARG00000095772	si:dkey-11o1.2	si:dkey-11o1.2	ZDB-GENE-100921-76	protein_coding
ENSDARG00000092303	si:dkey-11o15.8	si:dkey-11o15.8	ZDB-GENE-091204-77	protein_coding
ENSDARG00000076286	si:dkey-125e8.1	si:dkey-125e8.1	ZDB-GENE-131121-9	protein_coding
ENSDARG00000097459	si:dkey-125e8.3	si:dkey-125e8.3	ZDB-GENE-131121-373	protein_coding
ENSDARG00000105466	si:dkey-125e8.5	si:dkey-125e8.5	ZDB-GENE-160113-137	protein_coding
ENSDARG00000095263	si:dkey-145c18.4	si:dkey-145c18.4	ZDB-GENE-081104-309	protein_coding
ENSDARG00000093764	si:dkey-145c18.5	si:dkey-145c18.5	ZDB-GENE-081104-310	protein_coding
ENSDARG00000099785	si:dkey-146m20.13	si:dkey-146m20.13	ZDB-GENE-110914-223	protein_coding
ENSDARG00000097081	si:dkey-149i17.11	si:dkey-149i17.11	ZDB-GENE-131120-82	protein_coding
ENSDARG00000092491	si:dkey-149i17.8	si:dkey-149i17.8	ZDB-GENE-070912-375	protein_coding
ENSDARG00000112172	si:dkey-149i17.9	si:dkey-149i17.9	ZDB-GENE-070912-376	protein_coding
ENSDARG00000068713	si:dkey-14o1.20	si:dkey-14o1.20	ZDB-GENE-081105-46	protein_coding
ENSDARG00000092807	si:dkey-151g10.6	si:dkey-151g10.6	ZDB-GENE-030131-7528	protein_coding
ENSDARG00000095934	si:dkey-151m22.8	si:dkey-151m22.8	ZDB-GENE-110411-250	protein_coding
ENSDARG00000102256	si:dkey-157e10.6	si:dkey-157e10.6	ZDB-GENE-110913-118	protein_coding
ENSDARG00000101165	si:dkey-157e10.8	si:dkey-157e10.8	ZDB-GENE-110914-202	protein_coding
ENSDARG00000101121	si:dkey-161l11.62	si:dkey-161l11.62	ZDB-GENE-141212-182	TR_J_gene
ENSDARG00000099066	si:dkey-161l11.67	si:dkey-161l11.67	ZDB-GENE-141212-171	TR_J_gene
ENSDARG00000102522	si:dkey-161l11.74	si:dkey-161l11.74	ZDB-GENE-141212-129	TR_J_gene
ENSDARG00000103885	si:dkey-161l11.75	si:dkey-161l11.75	ZDB-GENE-141212-200	TR_J_gene
ENSDARG00000099394	si:dkey-161l11.76	si:dkey-161l11.76	ZDB-GENE-141212-138	TR_J_gene
ENSDARG00000099170	si:dkey-161l11.78	si:dkey-161l11.78	ZDB-GENE-141212-152	TR_J_gene
ENSDARG00000098498	si:dkey-161l11.79	si:dkey-161l11.79	ZDB-GENE-141212-91	TR_J_gene
ENSDARG00000093080	si:dkey-163f12.10	si:dkey-163f12.10	ZDB-GENE-081104-322	protein_coding
ENSDARG00000094473	si:dkey-163f12.6	si:dkey-163f12.6	ZDB-GENE-041210-350	protein_coding
ENSDARG00000101829	si:dkey-16b10.2	si:dkey-16b10.2	ZDB-GENE-120703-32	protein_coding
ENSDARG00000102027	si:dkey-172k15.11	si:dkey-172k15.11	ZDB-GENE-161017-10	protein_coding
ENSDARG00000092593	si:dkey-174k12.3	si:dkey-174k12.3	ZDB-GENE-070705-315	protein_coding
ENSDARG00000098167	si:dkey-176f19.4	si:dkey-176f19.4	ZDB-GENE-110913-20	protein_coding
ENSDARG00000103348	si:dkey-176f19.7	si:dkey-176f19.7	ZDB-GENE-110913-130	protein_coding
ENSDARG00000094212	si:dkey-179k24.1	si:dkey-179k24.1	ZDB-GENE-110914-97	protein_coding
ENSDARG00000112369	si:dkey-179k24.2	si:dkey-179k24.2	ZDB-GENE-110914-40	protein_coding
ENSDARG00000094217	si:dkey-17e16.15	si:dkey-17e16.15	ZDB-GENE-091204-295	protein_coding
ENSDARG00000092726	si:dkey-184p9.7	si:dkey-184p9.7	ZDB-GENE-091204-97	protein_coding
ENSDARG00000105427	si:dkey-187j14.8	si:dkey-187j14.8	ZDB-GENE-160113-2	protein_coding
ENSDARG00000086849	si:dkey-187k19.2	si:dkey-187k19.2	ZDB-GENE-131121-68	protein_coding
ENSDARG00000095001	si:dkey-194e6.2	si:dkey-194e6.2	ZDB-GENE-100921-54	protein_coding
ENSDARG00000091062	si:dkey-199k11.6	si:dkey-199k11.6	ZDB-GENE-060531-88	protein_coding
ENSDARG00000103143	si:dkey-19c16.12	si:dkey-19c16.12	ZDB-GENE-120703-20	protein_coding
ENSDARG00000074334	si:dkey-1c7.1	si:dkey-1c7.1	ZDB-GENE-121214-246	protein_coding
ENSDARG00000090670	si:dkey-201i6.8	si:dkey-201i6.8	ZDB-GENE-100922-83	protein_coding
ENSDARG00000095516	si:dkey-204f11.13	si:dkey-204f11.13	ZDB-GENE-040724-169	protein_coding
ENSDARG00000093274	si:dkey-204f11.51	si:dkey-204f11.51	ZDB-GENE-040724-149	protein_coding
ENSDARG00000102913	si:dkey-206d17.16	si:dkey-206d17.16	ZDB-GENE-081104-356	protein_coding
ENSDARG00000100654	si:dkey-207m2.4	si:dkey-207m2.4	ZDB-GENE-081103-58	protein_coding
ENSDARG00000097458	si:dkey-208m12.3	si:dkey-208m12.3	ZDB-GENE-050208-718	protein_coding
ENSDARG00000095455	si:dkey-20i20.10	si:dkey-20i20.10	ZDB-GENE-060503-905	protein_coding
ENSDARG00000101885	si:dkey-20i20.11	si:dkey-20i20.11	ZDB-GENE-060503-58	protein_coding
ENSDARG00000092246	si:dkey-20i20.3	si:dkey-20i20.3	ZDB-GENE-060503-623	protein_coding
ENSDARG00000093562	si:dkey-20i20.7	si:dkey-20i20.7	ZDB-GENE-060503-906	protein_coding
ENSDARG00000094343	si:dkey-20i20.8	si:dkey-20i20.8	ZDB-GENE-060503-59	protein_coding
ENSDARG00000092027	si:dkey-20i20.9	si:dkey-20i20.9	ZDB-GENE-060503-152	protein_coding
ENSDARG00000100647	si:dkey-211i20.4	si:dkey-211i20.4	ZDB-GENE-120709-19	protein_coding
ENSDARG00000100460	si:dkey-217g21.3	si:dkey-217g21.3	ZDB-GENE-110913-15	protein_coding
ENSDARG00000093680	si:dkey-218h11.6	si:dkey-218h11.6	ZDB-GENE-070424-225	protein_coding
ENSDARG00000094224	si:dkey-219e20.2	si:dkey-219e20.2	ZDB-GENE-041001-105	protein_coding
ENSDARG00000100121	si:dkey-21c1.8	si:dkey-21c1.8	ZDB-GENE-141216-126	protein_coding
ENSDARG00000092518	si:dkey-21e2.11	si:dkey-21e2.11	ZDB-GENE-050208-539	protein_coding
ENSDARG00000096187	si:dkey-21h14.10	si:dkey-21h14.10	ZDB-GENE-110913-2	protein_coding
ENSDARG00000103079	si:dkey-220o21.3	si:dkey-220o21.3	ZDB-GENE-110914-75	protein_coding
ENSDARG00000099347	si:dkey-220o21.4	si:dkey-220o21.4	ZDB-GENE-110914-128	protein_coding
ENSDARG00000092294	si:dkey-222h21.6	si:dkey-222h21.6	ZDB-GENE-081031-15	protein_coding
ENSDARG00000094083	si:dkey-223d7.6	si:dkey-223d7.6	ZDB-GENE-070912-450	protein_coding
ENSDARG00000102926	si:dkey-223p19.2	si:dkey-223p19.2	ZDB-GENE-120215-157	protein_coding
ENSDARG00000092045	si:dkey-225k4.1	si:dkey-225k4.1	ZDB-GENE-091204-219	protein_coding
ENSDARG00000069799	si:dkey-228l14.1	si:dkey-228l14.1	ZDB-GENE-090312-27	protein_coding
ENSDARG00000097228	si:dkey-234i14.12	si:dkey-234i14.12	ZDB-GENE-131127-173	protein_coding
ENSDARG00000114984	si:dkey-234i14.13	si:dkey-234i14.13	ZDB-GENE-131121-140	protein_coding
ENSDARG00000113738	si:dkey-234l24.7	si:dkey-234l24.7	ZDB-GENE-050420-90	protein_coding
ENSDARG00000094303	si:dkey-237j11.3	si:dkey-237j11.3	ZDB-GENE-100922-239	protein_coding
ENSDARG00000102316	si:dkey-237m9.2	si:dkey-237m9.2	ZDB-GENE-131119-68	protein_coding
ENSDARG00000096965	si:dkey-238d18.13	si:dkey-238d18.13	ZDB-GENE-131120-191	protein_coding
ENSDARG00000098881	si:dkey-238i5.3	si:dkey-238i5.3	ZDB-GENE-141222-86	protein_coding
ENSDARG00000093512	si:dkey-238j22.1	si:dkey-238j22.1	ZDB-GENE-070705-398	protein_coding
ENSDARG00000099384	si:dkey-238k10.1	si:dkey-238k10.1	ZDB-GENE-070705-399	protein_coding
ENSDARG00000093248	si:dkey-238m4.4	si:dkey-238m4.4	ZDB-GENE-100922-215	protein_coding
ENSDARG00000101252	si:dkey-238n5.3	si:dkey-238n5.3	ZDB-GENE-070424-228	protein_coding
ENSDARG00000103283	si:dkey-238o14.7	si:dkey-238o14.7	ZDB-GENE-110913-54	protein_coding
ENSDARG00000116002	si:dkey-23f9.6	si:dkey-23f9.6	ZDB-GENE-141216-98	protein_coding
ENSDARG00000110564	si:dkey-23f9.7	si:dkey-23f9.7	ZDB-GENE-141216-72	protein_coding
ENSDARG00000105612	si:dkey-23i12.9	si:dkey-23i12.9	ZDB-GENE-160728-118	protein_coding
ENSDARG00000095559	si:dkey-246j7.1	si:dkey-246j7.1	ZDB-GENE-050419-230	protein_coding
ENSDARG00000094556	si:dkey-24h22.5	si:dkey-24h22.5	ZDB-GENE-090313-274	protein_coding
ENSDARG00000088452	si:dkey-24i24.3	si:dkey-24i24.3	ZDB-GENE-110411-103	protein_coding
ENSDARG00000098536	si:dkey-25i10.1	si:dkey-25i10.1	ZDB-GENE-110913-114	protein_coding
ENSDARG00000102156	si:dkey-264f17.4	si:dkey-264f17.4	ZDB-GENE-110913-112	protein_coding
ENSDARG00000103417	si:dkey-269o24.6	si:dkey-269o24.6	ZDB-GENE-110914-22	protein_coding
ENSDARG00000095275	si:dkey-269p2.1	si:dkey-269p2.1	ZDB-GENE-081103-5	protein_coding
ENSDARG00000097317	si:dkey-276j7.3	si:dkey-276j7.3	ZDB-GENE-131127-428	protein_coding
ENSDARG00000101757	si:dkey-27n6.4	si:dkey-27n6.4	ZDB-GENE-041014-42	protein_coding
ENSDARG00000095502	si:dkey-286h21.1	si:dkey-286h21.1	ZDB-GENE-091116-5	protein_coding
ENSDARG00000104888	si:dkey-28i19.1	si:dkey-28i19.1	ZDB-GENE-110914-21	protein_coding
ENSDARG00000104096	si:dkey-29d5.1	si:dkey-29d5.1	ZDB-GENE-090313-300	protein_coding
ENSDARG00000092713	si:dkey-31b16.7	si:dkey-31b16.7	ZDB-GENE-090313-305	protein_coding
ENSDARG00000102218	si:dkey-31g6.4	si:dkey-31g6.4	ZDB-GENE-131127-517	protein_coding
ENSDARG00000112199	si:dkey-31m5.2	si:dkey-31m5.2	ZDB-GENE-070912-514	protein_coding
ENSDARG00000110121	si:dkey-31m5.3	si:dkey-31m5.3	ZDB-GENE-070912-515	protein_coding
ENSDARG00000114861	si:dkey-31m5.5	si:dkey-31m5.5	ZDB-GENE-070912-517	protein_coding
ENSDARG00000110529	si:dkey-31m5.7	si:dkey-31m5.7	ZDB-GENE-070912-519	protein_coding
ENSDARG00000103639	si:dkey-36i7.3	si:dkey-36i7.3	ZDB-GENE-131127-316	protein_coding
ENSDARG00000096239	si:dkey-3d18.5	si:dkey-3d18.5	ZDB-GENE-120215-143	protein_coding
ENSDARG00000092180	si:dkey-40m6.11	si:dkey-40m6.11	ZDB-GENE-100921-31	protein_coding
ENSDARG00000097838	si:dkey-42l23.1	si:dkey-42l23.1	ZDB-GENE-131121-192	protein_coding
ENSDARG00000097840	si:dkey-42l23.6	si:dkey-42l23.6	ZDB-GENE-131121-619	protein_coding
ENSDARG00000042107	si:dkey-44k1.5	si:dkey-44k1.5	ZDB-GENE-131120-10	protein_coding
ENSDARG00000101446	si:dkey-46i9.1	si:dkey-46i9.1	ZDB-GENE-141216-493	protein_coding
ENSDARG00000100707	si:dkey-48g21.7			lincRNA
ENSDARG00000074824	si:dkey-49c17.4	si:dkey-49c17.4	ZDB-GENE-130603-90	protein_coding
ENSDARG00000097477	si:dkey-4c2.11	si:dkey-4c2.11	ZDB-GENE-131127-372	protein_coding
ENSDARG00000090698	si:dkey-52j6.3	si:dkey-52j6.3	ZDB-GENE-121214-255	protein_coding
ENSDARG00000093724	si:dkey-54g2.2	si:dkey-54g2.2	ZDB-GENE-041014-140	protein_coding
ENSDARG00000104262	si:dkey-56m15.3	si:dkey-56m15.3	ZDB-GENE-110913-96	protein_coding
ENSDARG00000103420	si:dkey-56m15.5	si:dkey-56m15.5	ZDB-GENE-110913-134	protein_coding
ENSDARG00000093461	si:dkey-56m15.6	si:dkey-56m15.6	ZDB-GENE-110914-102	protein_coding
ENSDARG00000104270	si:dkey-56m15.7	si:dkey-56m15.7	ZDB-GENE-110914-162	protein_coding
ENSDARG00000103281	si:dkey-56m15.9	si:dkey-56m15.9	ZDB-GENE-110913-4	protein_coding
ENSDARG00000116169	si:dkey-57a22.13	si:dkey-57a22.13	ZDB-GENE-081104-425	protein_coding
ENSDARG00000095608	si:dkey-57k2.6	si:dkey-57k2.6	ZDB-GENE-070912-558	protein_coding
ENSDARG00000096506	si:dkey-58j15.11	si:dkey-58j15.11	ZDB-GENE-100922-27	protein_coding
ENSDARG00000112081	si:dkey-59p5.1	si:dkey-59p5.1	ZDB-GENE-141212-256	protein_coding
ENSDARG00000075179	si:dkey-59p5.2	si:dkey-59p5.2	ZDB-GENE-141212-265	protein_coding
ENSDARG00000099695	si:dkey-61n16.5	si:dkey-61n16.5	ZDB-GENE-100922-235	protein_coding
ENSDARG00000095565	si:dkey-65b13.1	si:dkey-65b13.1	ZDB-GENE-041001-216	protein_coding
ENSDARG00000101924	si:dkey-65b13.13	si:dkey-65b13.13	ZDB-GENE-141216-308	protein_coding
ENSDARG00000105249	si:dkey-65b13.9	si:dkey-65b13.9	ZDB-GENE-041014-335	protein_coding
ENSDARG00000094644	si:dkey-68l7.2	si:dkey-68l7.2	ZDB-GENE-090312-101	protein_coding
ENSDARG00000099121	si:dkey-6d5.1	si:dkey-6d5.1	ZDB-GENE-141216-54	protein_coding
ENSDARG00000095522	si:dkey-71b5.3	si:dkey-71b5.3	ZDB-GENE-100922-91	protein_coding
ENSDARG00000097846	si:dkey-74h17.3	si:dkey-74h17.3	ZDB-GENE-131127-415	protein_coding
ENSDARG00000117135	si:dkey-78l4.13	si:dkey-78l4.13	ZDB-GENE-060503-459	protein_coding
ENSDARG00000095438	si:dkey-78l4.4	si:dkey-78l4.4	ZDB-GENE-060503-836	protein_coding
ENSDARG00000100387	si:dkey-78o7.3	si:dkey-78o7.3	ZDB-GENE-120709-79	protein_coding
ENSDARG00000097225	si:dkey-79d12.6	si:dkey-79d12.6	ZDB-GENE-131127-253	protein_coding
ENSDARG00000070692	si:dkey-80c24.1	si:dkey-80c24.1	ZDB-GENE-061207-69	protein_coding
ENSDARG00000093579	si:dkey-80c24.4	si:dkey-80c24.4	ZDB-GENE-061207-72	protein_coding
ENSDARG00000092501	si:dkey-80c24.5	si:dkey-80c24.5	ZDB-GENE-061207-73	protein_coding
ENSDARG00000105462	si:dkey-82k12.13	si:dkey-82k12.13	ZDB-GENE-160113-130	protein_coding
ENSDARG00000095893	si:dkey-85n7.7	si:dkey-85n7.7	ZDB-GENE-110408-52	protein_coding
ENSDARG00000095137	si:dkey-88l16.2	si:dkey-88l16.2	ZDB-GENE-091113-59	protein_coding
ENSDARG00000092525	si:dkey-88l16.4	si:dkey-88l16.4	ZDB-GENE-091204-52	protein_coding
ENSDARG00000096897	si:dkey-90a13.10	si:dkey-90a13.10	ZDB-GENE-131121-317	protein_coding
ENSDARG00000101946	si:dkey-92j16.2	si:dkey-92j16.2	ZDB-GENE-110914-8	protein_coding
ENSDARG00000105475	si:dkey-9a6.4	si:dkey-9a6.4	ZDB-GENE-160114-12	protein_coding
ENSDARG00000096064	si:dkeyp-100h4.4	si:dkeyp-100h4.4	ZDB-GENE-110914-147	protein_coding
ENSDARG00000101129	si:dkeyp-104b3.18	si:dkeyp-104b3.18	ZDB-GENE-070912-624	protein_coding
ENSDARG00000100258	si:dkeyp-104b3.2	si:dkeyp-104b3.2	ZDB-GENE-070912-625	protein_coding
ENSDARG00000096708	si:dkeyp-104f11.8	si:dkeyp-104f11.8	ZDB-GENE-130531-24	protein_coding
ENSDARG00000102659	si:dkeyp-107f9.2	si:dkeyp-107f9.2	ZDB-GENE-120709-39	protein_coding
ENSDARG00000099268	si:dkeyp-13d12.11	si:dkeyp-13d12.11	ZDB-GENE-141212-216	TR_V_gene
ENSDARG00000098274	si:dkeyp-13d12.16	si:dkeyp-13d12.16	ZDB-GENE-141212-119	TR_J_gene
ENSDARG00000100445	si:dkeyp-13d12.17	si:dkeyp-13d12.17	ZDB-GENE-141212-149	TR_J_gene
ENSDARG00000103890	si:dkeyp-13d12.18	si:dkeyp-13d12.18	ZDB-GENE-141212-137	TR_J_gene
ENSDARG00000105200	si:dkeyp-13d12.19	si:dkeyp-13d12.19	ZDB-GENE-141212-196	TR_J_gene
ENSDARG00000102374	si:dkeyp-13d12.20	si:dkeyp-13d12.20	ZDB-GENE-141212-177	TR_J_gene
ENSDARG00000100027	si:dkeyp-13d12.21	si:dkeyp-13d12.21	ZDB-GENE-141212-210	TR_J_gene
ENSDARG00000101830	si:dkeyp-13d12.22	si:dkeyp-13d12.22	ZDB-GENE-141212-135	TR_J_gene
ENSDARG00000104518	si:dkeyp-13d12.23	si:dkeyp-13d12.23	ZDB-GENE-141212-2	IG_C_gene
ENSDARG00000102001	si:dkeyp-13d12.24	si:dkeyp-13d12.24	ZDB-GENE-141212-167	TR_V_gene
ENSDARG00000094163	si:dkeyp-19e1.4	si:dkeyp-19e1.4	ZDB-GENE-081104-63	protein_coding
ENSDARG00000093936	si:dkeyp-1h4.6	si:dkeyp-1h4.6	ZDB-GENE-060503-841	protein_coding
ENSDARG00000092956	si:dkeyp-27c8.1	si:dkeyp-27c8.1	ZDB-GENE-090313-381	protein_coding
ENSDARG00000089515	si:dkeyp-46h3.5	si:dkeyp-46h3.5	ZDB-GENE-060503-937	protein_coding
ENSDARG00000099899	si:dkeyp-51g9.4	si:dkeyp-51g9.4	ZDB-GENE-160628-1	protein_coding
ENSDARG00000091890	si:dkeyp-67e1.3	si:dkeyp-67e1.3	ZDB-GENE-061207-84	protein_coding
ENSDARG00000100281	si:dkeyp-6a3.1	si:dkeyp-6a3.1	ZDB-GENE-131121-609	protein_coding
ENSDARG00000094442	si:dkeyp-73g8.5	si:dkeyp-73g8.5	ZDB-GENE-091118-45	protein_coding
ENSDARG00000101087	si:dkeyp-80d11.1	si:dkeyp-80d11.1	ZDB-GENE-030131-4126	protein_coding
ENSDARG00000113808	si:dkeyp-82b4.6	si:dkeyp-82b4.6	ZDB-GENE-110914-71	protein_coding
ENSDARG00000098260	si:dkeyp-85h7.1	si:dkeyp-85h7.1	ZDB-GENE-120214-38	protein_coding
ENSDARG00000115843	si:rp71-1k13.6	si:rp71-1k13.6	ZDB-GENE-090312-52	protein_coding
ENSDARG00000099233	si:zfos-2372e4.1	si:zfos-2372e4.1	ZDB-GENE-131127-560	protein_coding
ENSDARG00000105383	si:zfos-405g10.4	si:zfos-405g10.4	ZDB-GENE-160113-124	protein_coding
ENSDARG00000089747	si:zfos-754c12.2	si:zfos-754c12.2	ZDB-GENE-130531-27	protein_coding
ENSDARG00000095826	smdt1a	single-pass membrane protein with aspartate-rich tail 1a	ZDB-GENE-110411-114	protein_coding
ENSDARG00000077861	sowahaa	sosondowah ankyrin repeat domain family member Aa	ZDB-GENE-100910-3	protein_coding
ENSDARG00000102757	tradv1	T-cell receptor alpha/delta variable 1	ZDB-GENE-170601-119	TR_V_gene
ENSDARG00000103552	tradv10.0.1	T-cell receptor alpha/delta variable 10.0.1	ZDB-GENE-170601-141	TR_V_gene
ENSDARG00000109710	tradv10.0.2	T-cell receptor alpha/delta variable 10.0.2	ZDB-GENE-170601-142	TR_V_gene
ENSDARG00000113032	tradv10.0.3	T-cell receptor alpha/delta variable 10.0.3	ZDB-GENE-170601-143	TR_V_gene
ENSDARG00000105150	tradv10.0.4	T-cell receptor alpha/delta variable 10.0.4	ZDB-GENE-170601-144	TR_V_gene
ENSDARG00000103009	tradv10.0.5	T-cell receptor alpha/delta variable 10.0.5	ZDB-GENE-170601-145	TR_V_gene
[truncated: 117 more rows]

## Sheet: 2 RefSeq missing from Ens95
RefSeq abbreviation	RefSeq Description	ZFIN ID (if available)	CDS?
actn2a	actinin, alpha 2a	ZDB-GENE-141114-2	yes		Total	CDS	with ZFIN ID
adgre13	adhesion G protein-coupled receptor E13	ZDB-GENE-150505-3	yes		3165	1665	316
adgrl1.1	adhesion G protein-coupled receptor L1.1	ZDB-GENE-130116-2	yes
aff1	AF4/FMR2 family, member 1	ZDB-GENE-110228-2	yes
ankrd34a	ankyrin repeat domain 34A	ZDB-GENE-110316-3	yes
ankrd52b	ankyrin repeat domain 52b	ZDB-GENE-121105-6	yes
ankrd63	ankyrin repeat domain 63		yes
anks6	ankyrin repeat and sterile alpha motif domain containing 6	ZDB-GENE-041010-213	no
ap3s1	adaptor-related protein complex 3, sigma 1 subunit	ZDB-GENE-041010-38	yes
arap1	ArfGAP with RhoGAP domain, ankyrin repeat and PH domain 1	ZDB-GENE-130723-3	yes
arhgef5	Rho guanine nucleotide exchange factor (GEF) 5	ZDB-GENE-130530-800	yes
ATP6	ATP synthase F0 subunit 6	ZDB-GENE-011205-18	yes
ATP8	ATP synthase F0 subunit 8	ZDB-GENE-011205-19	yes
b3galt1b	UDP-Gal:betaGlcNAc beta 1,3-galactosyltransferase, polypeptide 1b	ZDB-GENE-130530-770	yes
baalc	brain and acute leukemia, cytoplasmic	ZDB-GENE-030616-613	yes
bdkrb2	bradykinin receptor B2	ZDB-GENE-060515-1	yes
btbd18	BTB domain containing 18		yes
c13h10orf71	chromosome 13 C10orf71 homolog		yes
c14h4orf45	chromosome 14 C4orf45 homolog		yes
c15h3orf80	chromosome 15 C3orf80 homolog		yes
c16h7orf31	chromosome 16 C7orf31 homolog		yes
c18h15orf65	chromosome 18 C15orf65 homolog		yes
c19h1orf216	chromosome 19 C1orf216 homolog		yes
c8h22orf15	chromosome 8 C22orf15 homolog		yes
ccdc177	coiled-coil domain containing 177	ZDB-GENE-130530-718	yes
ccdc39	coiled-coil domain containing 39	ZDB-GENE-110603-1	yes
ccl32b.3	chemokine (C-C motif) ligand 32b, duplicate 3	ZDB-GENE-140715-6	yes
ccl39.9	chemokine (C-C motif) ligand 39, duplicate 9	ZDB-GENE-140722-6	no
cdhr5a	cadherin-related family member 5a	ZDB-GENE-110518-1	yes
chatb	choline O-acetyltransferase b	ZDB-GENE-140429-2	yes
chrm1b	cholinergic receptor, muscarinic 1b	ZDB-GENE-070705-188	yes
chst8	carbohydrate (N-acetylgalactosamine 4-0) sulfotransferase 8	ZDB-GENE-090410-1	yes
cntd1	cyclin N-terminal domain containing 1	ZDB-GENE-110606-1	yes
col15a1a	collagen, type XV, alpha 1a	ZDB-GENE-080918-1	yes
col27a1a	collagen, type XXVII, alpha 1a	ZDB-GENE-100119-1	yes
commd10	COMM domain containing 10	ZDB-GENE-050417-454	yes
cops6	COP9 signalosome subunit 6	ZDB-GENE-050417-289	yes
COX1	cytochrome c oxidase subunit I	ZDB-GENE-011205-14	yes
COX2	cytochrome c oxidase subunit II	ZDB-GENE-011205-15	yes
COX3	cytochrome c oxidase subunit III	ZDB-GENE-011205-16	yes
creb3l4	cAMP responsive element binding protein 3-like 4	ZDB-GENE-030131-403	yes
cskl	c-src tyrosine kinase-like		yes
ctxn2	cortexin 2	ZDB-GENE-030131-7805	yes
cul9	cullin 9		yes
cunh18orf32	chromosome unknown C18orf32 homolog		yes
cux2a	cut-like homeobox 2a	ZDB-GENE-031204-9	yes
cx55.5	connexin 55.5	ZDB-GENE-010619-3	yes
cysltr2a	cysteinyl leukotriene receptor 2a	ZDB-GENE-071016-1	yes
cysltr2b	cysteinyl leukotriene receptor 2b	ZDB-GENE-071016-2	yes
CYTB	cytochrome b	ZDB-GENE-011205-17	yes
dcstamp	dendrocyte expressed seven transmembrane protein	ZDB-GENE-121126-1	yes
ddx58	DEAD (Asp-Glu-Ala-Asp) box polypeptide 58	ZDB-GENE-090821-7	yes
dgkq	diacylglycerol kinase theta		yes
dio3a	deiodinase, iodothyronine, type IIIa	ZDB-GENE-120406-7	yes
diras2	DIRAS family GTPase 2	ZDB-GENE-190529-2	yes
drd5a	dopamine receptor D5a	ZDB-GENE-130522-2	yes
dsg2l	desmoglein 2 like	ZDB-GENE-120229-2	yes
dusp8b	dual specificity phosphatase 8b	ZDB-GENE-120914-3	yes
echdc1	enoyl CoA hydratase domain containing 1	ZDB-GENE-050522-370	yes
efna5b	ephrin-A5b	ZDB-GENE-980526-186	yes
elfn1a	extracellular leucine-rich repeat and fibronectin type III domain containing 1a	ZDB-GENE-120927-2	yes
eme2	essential meiotic structure-specific endonuclease subunit 2	ZDB-GENE-121226-1	yes
ephb3	EPH receptor B3		yes
erp27	endoplasmic reticulum protein 27		yes
etv6	ets variant 6	ZDB-GENE-010727-1	yes
evpll	envoplakin like		yes
ext1c	exostoses (multiple) 1c	ZDB-GENE-050211-5	yes
fam177b	family with sequence similarity 177 member B		yes
fam181b	family with sequence similarity 181 member B	ZDB-GENE-150206-1	yes
fastkd5	FAST kinase domains 5	ZDB-GENE-111013-2	yes
fep15	fep15 selenoprotein	ZDB-GENE-150112-1	yes
flrt1a	fibronectin leucine rich transmembrane protein 1a	ZDB-GENE-080327-22	yes
fsip1	fibrous sheath interacting protein 1	ZDB-GENE-050417-428	yes
ftr19	finTRIM family, member 19	ZDB-GENE-090506-5	yes
ftr24	finTRIM family, member 24	ZDB-GENE-050731-2	yes
ftr63	finTRIM family, member 63	ZDB-GENE-090508-6	yes
gb:ee300746	expressed sequence EE300746	ZDB-GENE-110214-2	yes
gig2q	grass carp reovirus (GCRV)-induced gene 2q	ZDB-GENE-130517-9	yes
gmfg	glia maturation factor, gamma	ZDB-GENE-060331-89	yes
gpr141	G protein-coupled receptor 141		yes
gpr31	G protein-coupled receptor 31	ZDB-GENE-070705-34	yes
gpr34a	G protein-coupled receptor 34a	ZDB-GENE-030131-7228	yes
gpr34l	G protein-coupled receptor 34 like	ZDB-GENE-040823-2	yes
gpr88	G protein-coupled receptor 88	ZDB-GENE-030131-8265	yes
gprin1	G protein regulated inducer of neurite outgrowth 1	ZDB-GENE-140106-192	yes
gramd2b	GRAM domain containing 2B		yes
grxcr2	glutaredoxin and cysteine rich domain containing 2		yes
hcar1-1	hydroxycarboxylic acid receptor 1-1	ZDB-GENE-111111-4	yes
hcar1-2	hydroxycarboxylic acid receptor 1-2	ZDB-GENE-111111-6	yes
hhla1	HERV-H LTR-associating 1		yes
hps6	HPS6, biogenesis of lysosomal organelles complex 2 subunit 3	ZDB-GENE-100927-1	yes
hrh1	histamine receptor H1	ZDB-GENE-070531-3	yes
hs3st1	heparan sulfate (glucosamine) 3-O-sulfotransferase 1	ZDB-GENE-070202-1	yes
hs3st1l1	heparan sulfate (glucosamine) 3-O-sulfotransferase 1-like1	ZDB-GENE-070202-2	yes
hspb12	heat shock protein, alpha-crystallin-related, b12	ZDB-GENE-030131-2741	yes
htr1e	5-hydroxytryptamine receptor 1E	ZDB-GENE-170210-3	yes
ift122	intraflagellar transport 122 homolog (Chlamydomonas)	ZDB-GENE-040426-2449	yes
ift43	intraflagellar transport 43	ZDB-GENE-111020-13	yes
im:7140347	im:7140347	ZDB-GENE-041111-109	yes
im:7145975	im:7145975	ZDB-GENE-050208-220	yes
im:7148405	im:7148405	ZDB-GENE-050309-75	no
im:7152688	im:7152688	ZDB-GENE-050309-229	no
im:7157825	im:7157825	ZDB-GENE-050809-53	yes
inafm2	InaF motif containing 2		yes
inpp5a	inositol polyphosphate-5-phosphatase A	ZDB-GENE-110930-10	yes
insc	INSC, spindle orientation adaptor protein		yes
irf4l	interferon regulatory factor 4 like	ZDB-GENE-071120-1	yes
itpripl2	inositol 1,4,5-trisphosphate receptor interacting protein like 2	ZDB-GENE-130816-1	yes
kcna10a	potassium voltage-gated channel, shaker-related subfamily, member 10a	ZDB-GENE-130925-4	yes
kcna3a	potassium voltage-gated channel, shaker-related subfamily, member 3a	ZDB-GENE-130530-873	yes
kiaa2026	KIAA2026 ortholog		yes
klf10	Kruppel-like factor 10	ZDB-GENE-030131-2991	yes
kmo	kynurenine 3-monooxygenase	ZDB-GENE-030424-4	yes
l3mbtl4	l(3)mbt-like 4 (Drosophila)	ZDB-GENE-110216-1	yes
lactb2	lactamase, beta 2	ZDB-GENE-040426-2257	yes
limd1b	LIM domains containing 1b	ZDB-GENE-060810-174	yes
LOC100000278	uncharacterized LOC100000278		yes
LOC100000365	2-epi-5-epi-valiolone synthase-like		yes
LOC100000417	immune-associated nucleotide-binding protein 8-like		yes
LOC100000504	GTPase IMAP family member 8-like		yes
LOC100000545	G-protein coupled bile acid receptor 1-like		yes
LOC100000748	uncharacterized LOC100000748		yes
LOC100000752	gastrula zinc finger protein XlCGF49.1-like		yes
LOC100000890	dapper homolog 3-like		yes
LOC100001178	zinc finger CCCH domain-containing protein 13-like		yes
LOC100001242	gastrula zinc finger protein XlCGF8.2DB-like	ZDB-GENE-030131-5120	yes
LOC100001832	gastrula zinc finger protein XlCGF8.2DB-like		yes
LOC100001908	uncharacterized LOC100001908		yes
LOC100002283	zinc finger protein 271-like		yes
LOC100002327	putative claudin-24		yes
LOC100002469	gastrula zinc finger protein XlCGF57.1-like		yes
LOC100002472	pleckstrin homology-like domain family A member 1		yes
LOC100002923	gastrula zinc finger protein XlCGF8.2DB-like		yes
LOC100003556	serine/threonine-protein kinase pim-2-like		yes
LOC100003716	uncharacterized LOC100003716		no
LOC100004033	free fatty acid receptor 3-like		yes
LOC100004160	potassium voltage-gated channel subfamily A member 1-like		yes
LOC100004848	uncharacterized LOC100004848		yes
LOC100004944	uncharacterized LOC100004944		yes
LOC100005038	uncharacterized LOC100005038		yes
LOC100005420	transmembrane protease serine 6		yes
LOC100005512	leukotriene B4 receptor 1-like		yes
LOC100005965	piggyBac transposable element-derived protein 4-like		yes
LOC100006542	torsin-1A-like		yes
LOC100006649	Schwann cell myelin protein-like		yes
LOC100006805	natural killer cell receptor 2B4-like		yes
LOC100006926	uncharacterized LOC100006926		no
LOC100006950	tripartite motif-containing protein 16-like		yes
LOC100006952	gastrula zinc finger protein XlCGF8.2DB-like		yes
LOC100007517	uncharacterized LOC100007517		no
LOC100007738	serine/threonine-protein kinase pim-1-like		yes
LOC100007966	gastrula zinc finger protein XlCGF8.2DB-like		yes
LOC100008030	oocyte zinc finger protein XlCOF6-like		yes
LOC100147871	claudin-4-like		yes
LOC100147925	B-cell receptor CD22-like		yes
LOC100148332	zinc finger protein 91-like		yes
LOC100148648	zinc finger protein 239-like		yes
LOC100148655	polymeric immunoglobulin receptor-like		yes
LOC100148925	GTPase IMAP family member 7-like		yes
LOC100148951	mastermind-like protein 2		yes
LOC100149007	zinc finger protein 319-like		yes
LOC100149074	kinesin-like protein KIF21A		yes
LOC100149190	GTPase IMAP family member 4-like		yes
LOC100149223	trace amine-associated receptor 13c-like		yes
LOC100149554	gastrula zinc finger protein XlCGF58.1-like		yes
LOC100149647	tctex1 domain-containing protein 3-like		yes
LOC100149669	gastrula zinc finger protein XlCGF8.2DB-like		yes
LOC100149931	GTPase IMAP family member 8-like		yes
LOC100149959	serine/threonine-protein kinase pim-2-like		yes
LOC100149966	uncharacterized LOC100149966		yes
LOC100149991	E3 ubiquitin-protein ligase TRIM39-like		yes
LOC100150038	histone H4		yes
LOC100150253	mannose-binding protein C-like		yes
LOC100150699	uncharacterized LOC100150699		yes
LOC100150834	Y+L amino acid transporter 2-like		yes
LOC100151165	GTPase IMAP family member 8-like		yes
LOC100151192	uncharacterized LOC100151192		yes
LOC100151196	PH and SEC7 domain-containing protein 1-like		yes
LOC100151503	gastrula zinc finger protein XlCGF8.2DB		yes
LOC100151603	uncharacterized LOC100151603		yes
LOC100216314	chemokine CCL-CUj		yes
LOC100329307	dermatan-sulfate epimerase-like protein		yes
LOC100329351	SLAM family member 5-like		yes
LOC100329378	uncharacterized LOC100329378		yes
LOC100329477	solute carrier family 12 member 2-like		yes
LOC100329490	uncharacterized LOC100329490		no
LOC100329768	G-protein coupled receptor 20-like		yes
LOC100329773	transmembrane protein 121-like		yes
LOC100329795	potassium/sodium hyperpolarization-activated cyclic nucleotide-gated channel 2-like		yes
LOC100329833	uncharacterized LOC100329833		yes
LOC100329885	zinc finger protein 239-like		yes
LOC100329927	ribonuclease inhibitor-like		yes
LOC100330136	CXXC-type zinc finger protein 4-like		yes
LOC100330246	claudin-20		yes
LOC100330250	uncharacterized LOC100330250		yes
LOC100330283	potassium voltage-gated channel subfamily A member 3-like		yes
LOC100330348	uncharacterized LOC100330348		yes
LOC100330441	uncharacterized LOC100330441		yes
LOC100330485	uncharacterized LOC100330485		yes
LOC100330501	RNA-binding Raly-like protein		yes
LOC100330575	proprotein convertase subtilisin/kexin type 5-like		yes
LOC100330690	uncharacterized LOC100330690		yes
LOC100330797	polycomb protein SCMH1-like		yes
LOC100330866	GTPase IMAP family member 8-like		yes
LOC100331003	zinc finger protein 583-like		yes
LOC100331054	gastrula zinc finger protein XlCGF57.1-like		yes
LOC100331067	butyrophilin-like protein 2		yes
LOC100331068	GTPase IMAP family member 8-like		yes
LOC100331080	CUB and zona pellucida-like domain-containing protein 1		yes
LOC100331115	RNA-binding protein MEX3D		yes
LOC100331268	phosphatase and actin regulator 1-like		yes
LOC100331306	serine/threonine-protein kinase 32C-like		yes
LOC100331349	unconventional myosin-XVIIIb-like		yes
LOC100331359	GTPase IMAP family member 7		yes
LOC100331367	lysine-specific histone demethylase 1B-like		yes
LOC100331404	gastrula zinc finger protein XlCGF8.2DB-like		yes
LOC100331407	tripartite motif-containing protein 16-like		yes
LOC100331417	glycosyltransferase family 92 protein F13G3.3-like		yes
LOC100331480	patched domain-containing protein 3-like		yes
LOC100331508	uncharacterized LOC100331508		yes
LOC100331510	solute carrier family 2, facilitated glucose transporter member 11-like		yes
LOC100331532	uncharacterized LOC100331532		no
LOC100331556	signal-induced proliferation-associated 1-like protein 2		yes
LOC100331639	myosin-9-like		yes
LOC100331720	uncharacterized LOC100331720		yes
LOC100331742	trace amine-associated receptor 13c-like		yes
LOC100331751	GTPase IMAP family member 8-like		yes
LOC100332070	gastrula zinc finger protein XlCGF8.2DB-like		yes
LOC100332108	uncharacterized LOC100332108		no
LOC100332187	sphingosine 1-phosphate receptor 3		yes
LOC100332207	potassium voltage-gated channel subfamily A member 7-like		yes
LOC100332221	uncharacterized LOC100332221		yes
LOC100332293	WD repeat domain phosphoinositide-interacting protein 1-like		yes
LOC100332351	uncharacterized LOC100332351		yes
LOC100332354	protein shisa-6 homolog		yes
LOC100332433	gastrula zinc finger protein XlCGF8.2DB-like		yes
LOC100332458	gastrula zinc finger protein XlCGF8.2DB-like		yes
LOC100332582	uncharacterized LOC100332582		yes
LOC100332698	uncharacterized LOC100332698		yes
LOC100332699	histone deacetylase 9-B-like		yes
LOC100332761	interferon-induced very large GTPase 1-like		yes
LOC100332834	uncharacterized LOC100332834		no
LOC100332841	hepatocyte growth factor activator-like		yes
LOC100332847	zinc finger protein 154-like		yes
LOC100332883	uncharacterized LOC100332883		no
LOC100332973	vicilin-like seed storage protein At2g18540		yes
LOC100333042	uncharacterized LOC100333042		no
LOC100333048	uncharacterized LOC100333048		yes
LOC100333051	NACHT, LRR and PYD domains-containing protein 12-like		yes
LOC100333163	histone H3.v1-like		yes
LOC100333168	B-cell receptor CD22-like		yes
LOC100333185	dnaJ homolog subfamily C member 30		yes
LOC100333218	interferon-inducible GTPase 5-like		yes
LOC100333241	KAT8 regulatory NSL complex subunit 1-like		yes
LOC100333244	B-cell receptor CD22-like		yes
LOC100333266	uncharacterized LOC100333266		yes
LOC100333290	oxygen-regulated protein 1-like		yes
LOC100333313	homeotic protein female sterile-like		yes
LOC100333474	endonuclease G, mitochondrial-like		yes
LOC100333697	somatostatin receptor type 2-like		yes
LOC100333749	dual specificity phosphatase DUPD1-like		yes
LOC100333807	uncharacterized LOC100333807		no
LOC100333826	fas-binding factor 1 homolog		yes
LOC100333840	uncharacterized LOC100333840		no
LOC100333844	serine/threonine-protein kinase NIM1-like		yes
LOC100333913	gamma-aminobutyric acid receptor subunit alpha-3		yes
LOC100333986	gastrula zinc finger protein XlCGF8.2DB-like		yes
LOC100334014	prolyl endopeptidase-like		yes
LOC100334104	gastrula zinc finger protein XlCGF49.1-like		yes
LOC100334269	receptor-type tyrosine-protein phosphatase mu-like		yes
LOC100334288	uncharacterized LOC100334288		no
LOC100334340	E3 ubiquitin-protein ligase TRIM39-like		yes
LOC100334356	solute carrier organic anion transporter family member 1C1-like		yes
LOC100334365	claudin-9-like		yes
LOC100334368	gastrula zinc finger protein XlCGF57.1-like		yes
LOC100334422	E3 ubiquitin-protein ligase RNF12-B-like		yes
LOC100334439	CMP-N-acetylneuraminate-beta-galactosamide-alpha-2,3-sialyltransferase 2-like		yes
LOC100334487	uncharacterized LOC100334487		no
LOC100334495	uncharacterized LOC100334495		yes
LOC100334508	uncharacterized LOC100334508		yes
LOC100334526	protease, serine 16		yes
LOC100334666	probable cation-transporting ATPase 13A3		yes
LOC100334716	guanylate-binding protein 2-like		yes
LOC100334731	ryanodine receptor 3-like		yes
LOC100334873	zinc finger protein 235-like		yes
LOC100334916	uncharacterized LOC100334916		no
LOC100534659	uncharacterized LOC100534659		yes
LOC100534673	protein unc-13 homolog A-like		yes
LOC100534679	CD209 antigen-like protein C		yes
LOC100534722	RNA-binding protein MEX3B-like		yes
LOC100534762	gastrula zinc finger protein XlCGF57.1-like		yes
LOC100534771	phosphatidylinositol-binding clathrin assembly protein-like	ZDB-GENE-030131-7935	yes
LOC100534780	caspase recruitment domain-containing protein 10-like		yes
LOC100534786	uncharacterized LOC100534786		yes
LOC100534829	uncharacterized LOC100534829		no
LOC100534832	RING finger protein 122-like		yes
LOC100534851	uncharacterized LOC100534851		yes
LOC100534892	gastrula zinc finger protein XlCGF57.1-like		yes
LOC100534908	gastrula zinc finger protein XlCGF57.1-like		yes
LOC100534993	uncharacterized LOC100534993		no
LOC100535016	glutamine synthetase-like		yes
LOC100535033	uncharacterized LOC100535033		no
LOC100535061	meiosis inhibitor protein 1		yes
LOC100535067	proline-rich protein 15-like		yes
LOC100535070	adhesion G protein-coupled receptor L2-like		yes
LOC100535079	B-cell receptor CD22-like		yes
LOC100535095	uncharacterized LOC100535095		no
LOC100535130	protein-lysine 6-oxidase-like		yes
LOC100535131	rho-associated protein kinase 2-like		yes
LOC100535133	rho GTPase-activating protein 40-like		yes
LOC100535162	beta-microseminoprotein J1-like		yes
LOC100535170	uncharacterized LOC100535170		no
LOC100535208	uncharacterized LOC100535208		yes
LOC100535210	caskin-2-like		yes
LOC100535286	zinc finger protein 239-like		yes
LOC100535331	uncharacterized LOC100535331		yes
LOC100535347	HERV-H LTR-associating protein 2-like		no
LOC100535390	uncharacterized LOC100535390		no
LOC100535396	TM2 domain-containing protein 1-like		yes
LOC100535405	cell wall protein DAN4-like	ZDB-GENE-161221-3	yes
LOC100535423	urokinase plasminogen activator surface receptor-like		yes
LOC100535476	gastrula zinc finger protein XlCGF57.1-like		yes
LOC100535487	uncharacterized LOC100535487		no
LOC100535494	pro-neuregulin-3, membrane-bound isoform		yes
LOC100535506	gastrula zinc finger protein XlCGF49.1-like		yes
LOC100535518	calcium-dependent secretion activator 1-like		yes
LOC100535525	uncharacterized LOC100535525		yes
LOC100535543	uncharacterized protein K02A2.6-like		yes
LOC100535550	uncharacterized LOC100535550		no
LOC100535552	uncharacterized LOC100535552		no
LOC100535565	adhesion G-protein coupled receptor F1-like		yes
LOC100535588	uncharacterized LOC100535588		no
LOC100535655	CD209 antigen-like protein 2		yes
LOC100535676	gastrula zinc finger protein XlCGF8.2DB-like		yes
LOC100535772	ankyrin repeat and fibronectin type-III domain-containing protein 1-like		yes
LOC100535806	uncharacterized LOC100535806		yes
LOC100535857	uncharacterized LOC100535857		yes
LOC100535869	uncharacterized LOC100535869		no
LOC100535984	uncharacterized LOC100535984		no
LOC100535985	uncharacterized LOC100535985		no
LOC100536045	G2/M phase-specific E3 ubiquitin-protein ligase-like		yes
LOC100536112	lysophospholipid acyltransferase LPCAT4-like		yes
LOC100536116	uncharacterized LOC100536116		yes
LOC100536119	NAD-dependent protein deacylase sirtuin-5, mitochondrial-like		yes
LOC100536156	venom phosphodiesterase 1-like		yes
LOC100536170	putative sodium-coupled neutral amino acid transporter 11		yes
LOC100536206	glycosyltransferase family 92 protein F13G3.3-like		yes
LOC100536213	uncharacterized LOC100536213		yes
LOC100536293	sushi, nidogen and EGF-like domain-containing protein 1		yes
LOC100536312	gastrula zinc finger protein XlCGF8.2DB-like		yes
LOC100536348	gastrula zinc finger protein XlCGF8.2DB-like		yes
LOC100536359	uncharacterized LOC100536359		no
LOC100536441	gastrula zinc finger protein XlCGF8.2DB-like		yes
LOC100536462	uncharacterized LOC100536462		no
LOC100536469	diacylglycerol kinase delta		yes
LOC100536501	RING finger protein 166		yes
LOC100536587	zinc finger protein 91-like		yes
LOC100536609	gastrula zinc finger protein XlCGF57.1-like		yes
LOC100536618	sperm acrosome-associated protein 5-like		yes
LOC100536630	prolactin-releasing peptide receptor-like		yes
LOC100536649	gastrula zinc finger protein XlCGF57.1-like		yes
LOC100536671	vegetative cell wall protein gp1-like		yes
LOC100536676	gastrula zinc finger protein XlCGF8.2DB-like		yes
LOC100536730	gastrula zinc finger protein XlCGF8.2DB-like		yes
LOC100536746	gastrula zinc finger protein XlCGF71.1-like		yes
LOC100536790	zinc finger protein basonuclin-2-like		yes
LOC100536797	uncharacterized LOC100536797		no
LOC100536850	gastrula zinc finger protein XlCGF57.1-like		yes
LOC100536887	uncharacterized LOC100536887		yes
LOC100536927	B-cell receptor CD22-like		yes
LOC100536939	NLR family CARD domain-containing protein 3-like		yes
LOC100536949	mucin-2-like		yes
LOC100536983	uncharacterized LOC100536983		no
LOC100537030	uncharacterized LOC100537030		no
LOC100537040	uncharacterized LOC100537040		no
LOC100537138	GTPase IMAP family member 6		yes
LOC100537147	uncharacterized LOC100537147		no
LOC100537163	CMRF35-like molecule 3		yes
LOC100537259	uncharacterized LOC100537259		yes
LOC100537263	PDZ domain-containing RING finger protein 4-like		yes
LOC100537265	uncharacterized LOC100537265		no
LOC100537272	macrophage mannose receptor 1-like		yes
LOC100537297	uncharacterized LOC100537297		no
LOC100537317	zinc finger protein 681-like		yes
LOC100537342	transcription factor COE3-like		yes
LOC100537368	putative nuclease HARBI1		yes
LOC100537369	transmembrane protein 74-like		yes
LOC100537377	gastrula zinc finger protein XlCGF8.2DB-like		yes
LOC100537389	multidrug and toxin extrusion protein 1-like		yes
LOC100537400	gastrula zinc finger protein XlCGF49.1-like		yes
LOC100537404	uncharacterized LOC100537404		no
LOC100537466	uncharacterized LOC100537466		yes
LOC100537554	serine/threonine-protein kinase DCLK2-like		yes
LOC100537572	gastrula zinc finger protein XlCGF8.2DB-like		yes
LOC100537584	gastrula zinc finger protein XlCGF8.2DB-like		yes
LOC100537633	alanine aminotransferase 2-like		yes
LOC100537640	carbohydrate sulfotransferase 15-like		yes
LOC100537649	probable N-acetyltransferase CML3		yes
LOC100537702	uncharacterized LOC100537702		no
LOC100537721	uncharacterized LOC100537721		no
LOC100537733	stonustoxin subunit beta-like		yes
LOC100537734	uncharacterized LOC100537734		no
LOC100537797	uncharacterized LOC100537797		yes
LOC100537803	plastin-2		yes
LOC100537813	glutamate receptor ionotropic, kainate 2		yes
LOC100537840	E3 ubiquitin-protein ligase rnf213-alpha-like		yes
LOC100537845	pre-B-cell leukemia transcription factor 1-like		yes
LOC100537874	regulating synaptic membrane exocytosis protein 2-like		yes
LOC100537963	unconventional myosin-XVIIIb-like		yes
LOC100538006	uncharacterized LOC100538006		no
LOC100538052	protein phosphatase Slingshot homolog 3-like		yes
LOC100538090	gastrula zinc finger protein XlCGF8.2DB-like		yes
LOC100538160	gastrula zinc finger protein XlCGF52.1-like		yes
LOC100538177	uncharacterized protein DDB_G0290685-like		yes
LOC100538195	adhesion G protein-coupled receptor E3-like		yes
LOC100538196	gastrula zinc finger protein XlCGF8.2DB-like		yes
LOC100538201	gastrula zinc finger protein XlCGF8.2DB-like		yes
LOC100538221	collagen alpha-1(IX) chain-like		yes
LOC100538255	uncharacterized LOC100538255		yes
LOC100538336	gastrula zinc finger protein XlCGF52.1-like		yes
LOC101882015	uncharacterized LOC101882015		no
LOC101882020	uncharacterized LOC101882020		yes
LOC101882026	uncharacterized LOC101882026		no
LOC101882032	astrotactin-2-like		yes
LOC101882033	uncharacterized LOC101882033		no
LOC101882034	uncharacterized LOC101882034		no
LOC101882039	uncharacterized LOC101882039		no
LOC101882048	uncharacterized LOC101882048		no
LOC101882067	uncharacterized LOC101882067		yes
LOC101882070	uncharacterized LOC101882070		yes
LOC101882111	zinc finger protein 431-like		yes
LOC101882124	uncharacterized LOC101882124		no
LOC101882128	butyrophilin-like protein 8		yes
LOC101882134	uncharacterized LOC101882134		yes
LOC101882135	extended synaptotagmin-2-A-like		yes
LOC101882151	vacuolar protein sorting-associated protein 13B		yes
LOC101882153	ephexin-1-like		yes
LOC101882159	polymeric immunoglobulin receptor-like		yes
LOC101882161	uncharacterized LOC101882161		no
LOC101882164	uncharacterized LOC101882164		no
LOC101882201	gastrula zinc finger protein XlCGF7.1-like		yes
LOC101882203	uncharacterized LOC101882203		no
LOC101882208	ras-related protein Rab-37-like		yes
LOC101882213	CMRF35-like molecule 8		yes
LOC101882221	myb-related transcription factor, partner of profilin-like		yes
LOC101882230	methionine aminopeptidase 2-like		yes
LOC101882231	protachykinin-like		yes
LOC101882249	calcium/calmodulin-dependent protein kinase kinase 2-like		yes
LOC101882250	uncharacterized LOC101882250		yes
LOC101882257	uncharacterized LOC101882257		no
LOC101882263	uncharacterized LOC101882263		no
LOC101882264	lymphocyte antigen 6F-like		yes
LOC101882272	vegetative cell wall protein gp1-like		yes
LOC101882287	uncharacterized LOC101882287		no
LOC101882289	uncharacterized LOC101882289		no
LOC101882290	putative nuclease HARBI1		yes
LOC101882309	uncharacterized LOC101882309		no
LOC101882312	uncharacterized LOC101882312		yes
LOC101882313	uncharacterized LOC101882313		no
LOC101882326	uncharacterized LOC101882326		no
LOC101882330	uncharacterized LOC101882330		no
LOC101882334	uncharacterized LOC101882334		no
LOC101882339	potassium/sodium hyperpolarization-activated cyclic nucleotide-gated channel 2-like		yes
LOC101882342	roundabout homolog 1-like		yes
LOC101882343	ephrin type-A receptor 3-like		yes
LOC101882344	uncharacterized LOC101882344		no
LOC101882350	polymeric immunoglobulin receptor-like		yes
LOC101882356	uncharacterized LOC101882356		yes
LOC101882358	disintegrin and metalloproteinase domain-containing protein 19-like		yes
LOC101882361	uncharacterized LOC101882361		no
LOC101882365	uncharacterized LOC101882365		yes
LOC101882369	uncharacterized LOC101882369		no
LOC101882374	uncharacterized LOC101882374		yes
LOC101882375	uncharacterized LOC101882375		yes
LOC101882378	uncharacterized LOC101882378		no
LOC101882397	uncharacterized LOC101882397		no
LOC101882402	zinc finger protein 135-like		yes
LOC101882403	uncharacterized LOC101882403		no
LOC101882433	uncharacterized LOC101882433		yes
LOC101882440	uncharacterized LOC101882440		yes
LOC101882443	uncharacterized LOC101882443		no
LOC101882447	uncharacterized LOC101882447		yes
LOC101882448	uncharacterized LOC101882448		no
LOC101882453	LIM and calponin homology domains-containing protein 1-like		yes
LOC101882460	zinc finger protein 239-like		yes
LOC101882464	uncharacterized LOC101882464		yes
LOC101882467	uncharacterized LOC101882467		no
LOC101882472	immunoglobulin superfamily DCC subclass member 3		yes
LOC101882475	gastrula zinc finger protein XlCGF8.2DB-like		yes
LOC101882480	ecto-ADP-ribosyltransferase 5-like		yes
LOC101882482	uncharacterized LOC101882482		no
LOC101882492	uncharacterized LOC101882492		no
LOC101882499	actin-binding protein-like		yes
LOC101882501	SET domain-containing protein 5-like		yes
LOC101882502	uncharacterized LOC101882502		no
LOC101882509	uncharacterized LOC101882509		no
LOC101882511	uncharacterized LOC101882511		yes
LOC101882515	uncharacterized LOC101882515		no
LOC101882518	uncharacterized LOC101882518		no
LOC101882521	uncharacterized LOC101882521		no
LOC101882525	uncharacterized LOC101882525		no
LOC101882530	uncharacterized LOC101882530		yes
LOC101882555	butyrophilin-like protein 2		yes
LOC101882559	uncharacterized LOC101882559		yes
LOC101882570	uncharacterized LOC101882570		yes
LOC101882573	putative methyltransferase NSUN7		yes
LOC101882584	uncharacterized LOC101882584		no
LOC101882590	uncharacterized LOC101882590		no
LOC101882592	uncharacterized LOC101882592		yes
LOC101882607	gastrula zinc finger protein XlCGF8.2DB-like		yes
LOC101882623	uncharacterized LOC101882623		no
LOC101882625	uncharacterized LOC101882625		no
LOC101882639	V-set domain-containing T-cell activation inhibitor 1-like		yes
LOC101882640	zinc finger protein 391-like		yes
LOC101882642	sterile alpha motif domain-containing protein 9-like		yes
LOC101882645	uncharacterized LOC101882645		no
LOC101882658	uncharacterized LOC101882658		no
LOC101882661	uncharacterized LOC101882661		yes
LOC101882663	uncharacterized LOC101882663		no
LOC101882667	gastrula zinc finger protein XlCGF8.2DB-like		yes
LOC101882668	uncharacterized LOC101882668		no
LOC101882691	uncharacterized LOC101882691		yes
LOC101882704	cilia- and flagella-associated protein 251-like		yes
LOC101882713	uncharacterized LOC101882713		no
LOC101882726	uncharacterized LOC101882726		no
LOC101882730	PWWP domain-containing protein MUM1L1-like		yes
LOC101882751	uncharacterized LOC101882751		no
LOC101882757	integrin alpha-X-like		yes
LOC101882760	intraflagellar transport protein 43 homolog		yes
LOC101882765	caskin-2		yes
LOC101882766	uncharacterized LOC101882766		no
LOC101882770	thrombomodulin-like		yes
LOC101882771	uncharacterized LOC101882771		yes
LOC101882775	uncharacterized LOC101882775		no
LOC101882789	proton myo-inositol cotransporter-like		yes
LOC101882795	uncharacterized LOC101882795		yes
LOC101882805	uncharacterized LOC101882805		yes
LOC101882822	uncharacterized LOC101882822		no
LOC101882826	complement component C1q receptor		yes
LOC101882843	uncharacterized LOC101882843		yes
LOC101882845	uncharacterized LOC101882845		no
LOC101882847	rho-associated protein kinase 1-like		yes
LOC101882857	potassium channel subfamily K member 4-like		yes
LOC101882859	uncharacterized LOC101882859		yes
LOC101882861	uncharacterized LOC101882861		no
LOC101882864	uncharacterized LOC101882864		no
LOC101882866	tyrosine-protein kinase SgK223-like		yes
LOC101882869	glycine-rich cell wall structural protein-like		yes
LOC101882884	uncharacterized LOC101882884		no
LOC101882910	uncharacterized LOC101882910		no
LOC101882916	uncharacterized LOC101882916		no
LOC101882921	uncharacterized LOC101882921		yes
LOC101882926	RING finger protein 223-like		yes
LOC101882928	vegetative cell wall protein gp1-like		yes
LOC101882950	kinesin-like protein KIF21A		yes
LOC101882952	uncharacterized LOC101882952		no
LOC101882957	putative nuclease HARBI1		yes
LOC101882959	uncharacterized LOC101882959		yes
LOC101882962	uncharacterized LOC101882962		no
LOC101882965	uncharacterized LOC101882965		no
LOC101882981	uncharacterized LOC101882981		no
LOC101882986	uncharacterized LOC101882986		no
LOC101882989	uncharacterized LOC101882989		no
LOC101882990	uncharacterized LOC101882990		yes
LOC101883001	GTPase IMAP family member 4-like		yes
LOC101883005	uncharacterized LOC101883005		yes
LOC101883010	uncharacterized LOC101883010		no
LOC101883014	uncharacterized LOC101883014		no
LOC101883023	kinesin-like protein KIF21A		yes
LOC101883034	uncharacterized LOC101883034		no
LOC101883036	uncharacterized LOC101883036		no
LOC101883046	uncharacterized LOC101883046		yes
LOC101883052	uncharacterized LOC101883052		no
LOC101883054	uncharacterized LOC101883054		yes
LOC101883064	uncharacterized LOC101883064		yes
LOC101883067	uncharacterized LOC101883067		yes
LOC101883084	NACHT, LRR and PYD domains-containing protein 3-like		yes
LOC101883104	uncharacterized LOC101883104		no
LOC101883110	rho-associated protein kinase 1-like		yes
LOC101883113	uncharacterized LOC101883113		no
LOC101883131	uncharacterized LOC101883131		yes
LOC101883144	uncharacterized LOC101883144		yes
LOC101883153	uncharacterized LOC101883153		yes
LOC101883154	cilia- and flagella-associated protein 57-like		yes
LOC101883160	uncharacterized LOC101883160		no
LOC101883163	uncharacterized LOC101883163		yes
LOC101883165	neuropeptide FF receptor 2-like		yes
LOC101883166	uncharacterized LOC101883166		no
LOC101883170	vacuolar protein sorting-associated protein 13C-like		yes
LOC101883172	rho-associated protein kinase 1-like		yes
LOC101883177	uncharacterized LOC101883177		yes
LOC101883188	uncharacterized LOC101883188		yes
LOC101883201	A disintegrin and metalloproteinase with thrombospondin motifs 20-like		yes
LOC101883202	uncharacterized LOC101883202		no
LOC101883222	serine/threonine-protein kinase pim-2-like		yes
LOC101883229	uncharacterized LOC101883229		no
LOC101883231	uncharacterized LOC101883231		no
LOC101883232	NF-kappa-B inhibitor delta-like		yes
LOC101883235	uncharacterized LOC101883235		no
LOC101883251	uncharacterized LOC101883251		yes
LOC101883262	uncharacterized LOC101883262		no
LOC101883267	uncharacterized LOC101883267		no
LOC101883268	uncharacterized LOC101883268		yes
LOC101883269	rho-associated protein kinase 1-like		yes
LOC101883270	uncharacterized LOC101883270		yes
LOC101883314	uncharacterized LOC101883314		no
LOC101883319	uncharacterized LOC101883319		yes
LOC101883320	acylamino-acid-releasing enzyme-like		yes
LOC101883323	uncharacterized LOC101883323		no
LOC101883327	uncharacterized LOC101883327		no
LOC101883343	afadin-like		yes
LOC101883361	uncharacterized LOC101883361		no
LOC101883363	uncharacterized LOC101883363		no
LOC101883368	putative nuclease HARBI1		yes
LOC101883382	plexin-C1-like		yes
LOC101883391	gastrula zinc finger protein XlCGF57.1-like		yes
LOC101883398	uncharacterized LOC101883398		no
LOC101883403	uncharacterized LOC101883403		no
LOC101883414	galanin receptor type 2-like		yes
LOC101883443	uncharacterized LOC101883443		no
LOC101883451	uncharacterized LOC101883451		yes
LOC101883468	immune-associated nucleotide-binding protein 10-like		yes
LOC101883472	uncharacterized LOC101883472		no
LOC101883486	zinc finger protein 525-like		yes
LOC101883493	uncharacterized LOC101883493		no
LOC101883505	gastrula zinc finger protein XlCGF8.2DB-like		yes
LOC101883507	transmembrane protein 100-like		yes
LOC101883513	gastrula zinc finger protein XlCGF57.1-like		yes
LOC101883516	uncharacterized LOC101883516		no
LOC101883520	antimicrobial peptide NK-lysin-like		yes
LOC101883531	B-cell receptor CD22-like		yes
LOC101883537	C-X-C motif chemokine 11-6-like		yes
LOC101883538	serine/threonine-protein kinase WNK3-like		yes
LOC101883543	uncharacterized LOC101883543		no
LOC101883549	uncharacterized LOC101883549		yes
LOC101883550	uncharacterized LOC101883550		yes
LOC101883552	DDRGK domain-containing protein 1-like		yes
LOC101883563	nitric oxide-associated protein 1-like		yes
LOC101883574	uncharacterized LOC101883574		yes
LOC101883584	uncharacterized LOC101883584		no
LOC101883588	kinesin-like protein KIF26B		yes
LOC101883590	sterile alpha motif domain-containing protein 3-like		yes
LOC101883592	uncharacterized LOC101883592		yes
LOC101883594	zinc finger protein 883-like		yes
LOC101883600	potassium voltage-gated channel subfamily H member 7-like		yes
LOC101883615	uncharacterized LOC101883615		yes
LOC101883618	uncharacterized protein PF11_0213-like		yes
LOC101883642	gastrula zinc finger protein XlCGF8.2DB-like		yes
LOC101883647	uncharacterized LOC101883647		no
LOC101883659	uncharacterized LOC101883659		yes
LOC101883668	paraneoplastic antigen Ma2-like		yes
LOC101883670	immune-associated nucleotide-binding protein 9-like		yes
LOC101883681	uncharacterized LOC101883681		no
LOC101883688	uncharacterized LOC101883688		no
LOC101883690	dynein cytoplasmic 1 intermediate chain 1		yes
LOC101883693	uncharacterized LOC101883693		no
LOC101883697	uncharacterized LOC101883697		no
LOC101883704	uncharacterized protein KIAA2026-like		yes
LOC101883706	uncharacterized LOC101883706		no
LOC101883712	uncharacterized LOC101883712		no
LOC101883715	uncharacterized LOC101883715		yes
LOC101883723	uncharacterized protein PB18E9.04c-like		yes
LOC101883727	uncharacterized protein K02A2.6-like		yes
LOC101883730	uncharacterized LOC101883730		no
LOC101883734	uncharacterized LOC101883734		no
LOC101883748	uncharacterized LOC101883748		no
LOC101883751	protein phosphatase 1 regulatory subunit 3E-like		yes
LOC101883755	uncharacterized LOC101883755		no
LOC101883766	uncharacterized LOC101883766		no
LOC101883768	uncharacterized LOC101883768		yes
LOC101883770	uncharacterized LOC101883770		no
LOC101883771	uncharacterized LOC101883771		yes
LOC101883779	gastrula zinc finger protein XlCGF7.1-like		yes
LOC101883780	zinc finger CCHC domain-containing protein 12-like		yes
LOC101883789	uncharacterized LOC101883789		no
LOC101883797	uncharacterized LOC101883797		no
LOC101883804	uncharacterized LOC101883804		yes
LOC101883807	uncharacterized LOC101883807		no
LOC101883815	protein FAM122A-like		yes
LOC101883821	uncharacterized LOC101883821		no
LOC101883823	uncharacterized LOC101883823		no
LOC101883825	polymeric immunoglobulin receptor-like		yes
LOC101883836	uncharacterized LOC101883836		yes
LOC101883850	5-hydroxytryptamine receptor 3C-like		yes
LOC101883855	protein unc-79 homolog		yes
LOC101883857	uncharacterized LOC101883857		no
LOC101883862	uncharacterized LOC101883862		yes
LOC101883870	uncharacterized LOC101883870		no
LOC101883873	uncharacterized LOC101883873		no
LOC101883884	uncharacterized LOC101883884		no
LOC101883894	A disintegrin and metalloproteinase with thrombospondin motifs 2-like		yes
LOC101883897	uncharacterized LOC101883897		no
LOC101883903	uncharacterized LOC101883903		no
LOC101883904	uncharacterized LOC101883904		no
LOC101883911	beta-1,3-galactosyltransferase 4-like		yes
LOC101883917	uncharacterized LOC101883917		no
LOC101883921	uncharacterized LOC101883921		no
LOC101883948	uncharacterized LOC101883948		no
LOC101883959	gastrula zinc finger protein XlCGF7.1-like		yes
LOC101883960	B-cell receptor CD22-like		yes
LOC101883977	bile salt export pump-like		yes
LOC101883981	uncharacterized LOC101883981		no
LOC101883985	uncharacterized LOC101883985		no
LOC101883999	polymeric immunoglobulin receptor-like		yes
LOC101884022	cingulin-like		yes
LOC101884024	uncharacterized LOC101884024		no
LOC101884025	phosphofurin acidic cluster sorting protein 1-like		yes
LOC101884027	uncharacterized LOC101884027		no
LOC101884028	uncharacterized LOC101884028		no
LOC101884032	uncharacterized LOC101884032		no
LOC101884045	HEPACAM family member 2-like		yes
LOC101884056	uncharacterized LOC101884056		no
LOC101884057	uncharacterized LOC101884057		yes
LOC101884081	uncharacterized LOC101884081		no
LOC101884088	uncharacterized LOC101884088		no
LOC101884089	zinc finger protein 595-like		yes
LOC101884098	uncharacterized LOC101884098		no
LOC101884106	serine/threonine-protein phosphatase with EF-hands 2-like		yes
LOC101884113	F-BAR and double SH3 domains protein 2-like		yes
LOC101884125	ral guanine nucleotide dissociation stimulator-like 1		yes
LOC101884132	uncharacterized LOC101884132		no
LOC101884142	uncharacterized LOC101884142		yes
LOC101884145	uncharacterized LOC101884145		yes
LOC101884161	cysteine protease ATG4D-like		yes
LOC101884162	uncharacterized LOC101884162		no
LOC101884165	uncharacterized LOC101884165		yes
LOC101884166	uncharacterized LOC101884166		yes
LOC101884169	uncharacterized LOC101884169		no
LOC101884173	paraneoplastic antigen Ma1 homolog		yes
LOC101884177	uncharacterized LOC101884177		yes
LOC101884178	uncharacterized LOC101884178		no
LOC101884182	uncharacterized LOC101884182		no
LOC101884186	astrotactin-2-like		yes
LOC101884200	uncharacterized LOC101884200		no
LOC101884202	uncharacterized LOC101884202		yes
LOC101884206	uncharacterized LOC101884206		no
LOC101884207	uncharacterized LOC101884207		no
LOC101884209	uncharacterized LOC101884209		no
LOC101884216	uncharacterized LOC101884216		no
LOC101884231	uncharacterized LOC101884231		yes
LOC101884238	adhesion G-protein coupled receptor D2-like		yes
LOC101884250	protein unc-79 homolog		yes
LOC101884251	uncharacterized LOC101884251		yes
LOC101884255	rap1 GTPase-activating protein 1-like		yes
LOC101884267	uncharacterized LOC101884267		no
LOC101884285	zinc finger BED domain-containing protein 1-like		yes
LOC101884296	melanoma receptor tyrosine-protein kinase-like		yes
LOC101884298	Golgi-associated PDZ and coiled-coil motif-containing protein-like		yes
LOC101884314	uncharacterized LOC101884314		yes
LOC101884327	rho-associated protein kinase 2-like		yes
LOC101884337	uncharacterized LOC101884337		no
LOC101884340	uncharacterized LOC101884340		no
LOC101884353	uncharacterized LOC101884353		no
LOC101884359	UPF0583 protein C15orf59 homolog		yes
LOC101884366	melanoma receptor tyrosine-protein kinase-like		yes
LOC101884369	uncharacterized LOC101884369		yes
LOC101884375	uncharacterized LOC101884375		no
LOC101884377	uncharacterized LOC101884377		no
LOC101884387	uncharacterized LOC101884387		no
LOC101884401	uncharacterized LOC101884401		no
LOC101884402	uncharacterized LOC101884402		no
LOC101884404	uncharacterized LOC101884404		no
LOC101884422	uncharacterized LOC101884422		yes
LOC101884431	uncharacterized LOC101884431		no
LOC101884441	protein shisa-6 homolog		yes
LOC101884443	uncharacterized LOC101884443		no
LOC101884446	uncharacterized LOC101884446		no
LOC101884451	uncharacterized LOC101884451		no
LOC101884462	putative nuclease HARBI1		yes
LOC101884463	uncharacterized LOC101884463		no
LOC101884469	uncharacterized LOC101884469		yes
LOC101884473	zinc finger protein 239-like		yes
LOC101884482	gastrula zinc finger protein XlCGF8.2DB-like		yes
LOC101884484	immune-associated nucleotide-binding protein 13-like		yes
LOC101884506	uncharacterized LOC101884506		no
LOC101884507	sialoadhesin-like		yes
LOC101884510	uncharacterized LOC101884510		no
LOC101884514	uncharacterized LOC101884514		no
LOC101884529	uncharacterized LOC101884529		no
LOC101884533	uncharacterized LOC101884533		no
LOC101884541	zinc finger CCHC domain-containing protein 12-like		yes
LOC101884545	uncharacterized LOC101884545		no
LOC101884549	uncharacterized LOC101884549		no
LOC101884552	paraneoplastic antigen Ma1 homolog		yes
LOC101884568	uncharacterized LOC101884568		no
LOC101884572	uncharacterized LOC101884572		no
LOC101884581	uncharacterized LOC101884581		no
LOC101884583	uncharacterized LOC101884583		yes
LOC101884586	NACHT, LRR and PYD domains-containing protein 3-like		yes
LOC101884606	uncharacterized LOC101884606		no
LOC101884608	uncharacterized LOC101884608		no
LOC101884613	uncharacterized LOC101884613		no
LOC101884617	uncharacterized LOC101884617		no
LOC101884619	uncharacterized LOC101884619		no
LOC101884626	uncharacterized LOC101884626		yes
LOC101884638	sterile alpha motif domain-containing protein 3-like		yes
LOC101884641	gastrula zinc finger protein XlCGF49.1-like		yes
LOC101884647	galanin receptor type 1-like		yes
LOC101884652	uncharacterized LOC101884652		no
LOC101884655	uncharacterized LOC101884655		no
LOC101884666	protein unc-13 homolog C-like		yes
LOC101884676	MAM domain-containing glycosylphosphatidylinositol anchor protein 2-like		yes
LOC101884680	uncharacterized LOC101884680		no
LOC101884685	golgin subfamily A member 6-like protein 22		yes
LOC101884686	zinc finger protein 239-like		yes
LOC101884695	uncharacterized LOC101884695		no
LOC101884703	uncharacterized LOC101884703		no
LOC101884708	uncharacterized LOC101884708		yes
LOC101884718	uncharacterized LOC101884718		yes
LOC101884727	uncharacterized LOC101884727		yes
LOC101884729	GRAM domain-containing protein 1A-like		yes
LOC101884742	lipoxygenase homology domain-containing protein 1-like		yes
LOC101884743	F-box only protein 10-like		yes
LOC101884747	uncharacterized LOC101884747		no
LOC101884753	uncharacterized LOC101884753		yes
LOC101884756	trichohyalin-like		yes
LOC101884757	fidgetin-like		yes
LOC101884772	uncharacterized LOC101884772		no
LOC101884781	uncharacterized LOC101884781		no
LOC101884789	uncharacterized LOC101884789		yes
LOC101884792	uncharacterized LOC101884792		no
LOC101884799	uncharacterized LOC101884799		no
LOC101884841	uncharacterized LOC101884841		no
LOC101884845	potassium voltage-gated channel subfamily KQT member 4-like		yes
LOC101884850	gastrula zinc finger protein XlCGF8.2DB-like		yes
LOC101884862	uncharacterized LOC101884862		no
LOC101884869	uncharacterized LOC101884869		no
LOC101884874	stonustoxin subunit alpha-like		yes
LOC101884894	V-set and transmembrane domain-containing protein 2-like protein		yes
LOC101884898	uncharacterized LOC101884898		yes
LOC101884918	choline O-acetyltransferase-like		yes
LOC101884919	uncharacterized LOC101884919		no
LOC101884923	uncharacterized LOC101884923		yes
LOC101884926	uncharacterized LOC101884926		yes
LOC101884938	tensin-3-like		yes
LOC101884959	uncharacterized LOC101884959		yes
LOC101884961	gastrula zinc finger protein XlCGF57.1-like		yes
LOC101884963	uncharacterized LOC101884963		no
LOC101884966	uncharacterized LOC101884966		no
LOC101884973	hydroxycarboxylic acid receptor 2-like		yes
LOC101884976	orexin receptor type 2-like		yes
LOC101884979	uncharacterized LOC101884979		no
LOC101884985	adhesion G protein-coupled receptor L1-like		yes
LOC101884990	uncharacterized LOC101884990		yes
LOC101884996	uncharacterized LOC101884996		yes
LOC101885008	ral guanine nucleotide dissociation stimulator-like		yes
LOC101885016	uncharacterized LOC101885016		no
LOC101885027	uncharacterized LOC101885027		yes
LOC101885030	uncharacterized LOC101885030		no
LOC101885037	uncharacterized LOC101885037		yes
LOC101885047	uncharacterized LOC101885047		no
LOC101885051	uncharacterized LOC101885051		no
LOC101885053	uncharacterized LOC101885053		no
LOC101885058	uncharacterized LOC101885058		no
LOC101885062	metalloproteinase inhibitor 3-like		yes
LOC101885065	sialoadhesin-like		yes
LOC101885066	uncharacterized LOC101885066		no
LOC101885075	myelin-associated glycoprotein-like		yes
LOC101885084	uncharacterized LOC101885084		no
LOC101885085	uncharacterized LOC101885085		no
LOC101885086	probable cation-transporting ATPase 13A3		yes
LOC101885087	uncharacterized LOC101885087		yes
LOC101885088	uncharacterized LOC101885088		yes
LOC101885092	uncharacterized LOC101885092		no
LOC101885096	poly [ADP-ribose] polymerase 14-like		yes
LOC101885099	tensin-3-like		yes
LOC101885108	uncharacterized LOC101885108		no
LOC101885117	uncharacterized LOC101885117		yes
LOC101885134	uncharacterized LOC101885134		no
LOC101885143	uncharacterized LOC101885143		no
LOC101885147	uncharacterized LOC101885147		no
LOC101885149	uncharacterized LOC101885149		yes
LOC101885158	uncharacterized LOC101885158		yes
LOC101885174	aurora kinase-like		yes
LOC101885178	uncharacterized LOC101885178		no
LOC101885184	uncharacterized LOC101885184		no
LOC101885188	probable G-protein coupled receptor 151		yes
LOC101885193	gastrula zinc finger protein XlCGF8.2DB-like		yes
LOC101885194	putative V-set and immunoglobulin domain-containing-like protein IGHV4OR15-8		yes
LOC101885205	uncharacterized LOC101885205		yes
LOC101885209	uncharacterized LOC101885209		no
LOC101885216	protein FAM13A-like		yes
LOC101885220	uncharacterized LOC101885220		no
LOC101885229	uncharacterized LOC101885229		no
LOC101885246	uncharacterized LOC101885246		no
LOC101885253	uncharacterized LOC101885253		no
LOC101885254	uncharacterized LOC101885254		no
LOC101885266	uncharacterized LOC101885266		yes
LOC101885283	sodium/hydrogen exchanger 9B2-like		yes
LOC101885297	uncharacterized LOC101885297		no
LOC101885301	scavenger receptor cysteine-rich type 1 protein M130-like		yes
LOC101885311	uncharacterized LOC101885311		no
LOC101885315	uncharacterized LOC101885315		yes
LOC101885328	serine/threonine-protein kinase WNK2-like		yes
LOC101885330	uncharacterized LOC101885330		no
LOC101885332	mucin-2-like		yes
LOC101885342	serine/threonine-protein kinase pim-2-like		yes
LOC101885345	uncharacterized LOC101885345		yes
LOC101885358	uncharacterized LOC101885358		no
LOC101885368	uncharacterized LOC101885368		no
LOC101885373	potassium/sodium hyperpolarization-activated cyclic nucleotide-gated channel 2-like		yes
LOC101885376	gastrula zinc finger protein XlCGF71.1-like		yes
LOC101885377	uncharacterized LOC101885377		yes
LOC101885382	rap guanine nucleotide exchange factor 5-like		yes
LOC101885400	uncharacterized LOC101885400		yes
LOC101885404	tetratricopeptide repeat protein 39A-like		yes
LOC101885413	uncharacterized LOC101885413		no
LOC101885417	uncharacterized LOC101885417		no
LOC101885431	probable G-protein coupled receptor 148		yes
LOC101885432	uncharacterized LOC101885432		no
LOC101885445	uncharacterized LOC101885445		yes
LOC101885454	arf-GAP with dual PH domain-containing protein 1-like		yes
LOC101885464	uncharacterized LOC101885464		yes
LOC101885477	sperm acrosome membrane-associated protein 4-like	ZDB-GENE-180907-1	yes
LOC101885478	exostosin-1-like		yes
LOC101885479	uncharacterized LOC101885479		no
LOC101885484	uncharacterized LOC101885484		no
LOC101885485	uncharacterized LOC101885485		yes
LOC101885504	uncharacterized LOC101885504		yes
LOC101885506	uncharacterized LOC101885506		yes
LOC101885528	uncharacterized LOC101885528		no
LOC101885530	uncharacterized LOC101885530		no
LOC101885535	uncharacterized LOC101885535		no
LOC101885536	uncharacterized LOC101885536		no
LOC101885538	uncharacterized LOC101885538		no
LOC101885541	uncharacterized LOC101885541		no
LOC101885553	uncharacterized LOC101885553		no
LOC101885558	uncharacterized LOC101885558		no
LOC101885559	uncharacterized LOC101885559		yes
LOC101885577	uncharacterized LOC101885577		no
LOC101885583	uncharacterized LOC101885583		yes
LOC101885588	uncharacterized LOC101885588		no
LOC101885593	inactive phospholipase D5-like		yes
LOC101885599	A disintegrin and metalloproteinase with thrombospondin motifs 20-like		yes
LOC101885606	transcription factor PU.1-like		yes
LOC101885611	mesenteric estrogen-dependent adipogenesis protein-like		yes
LOC101885626	leucine-rich repeat-containing protein 63-like		yes
LOC101885631	5-hydroxytryptamine receptor 3A-like		yes
LOC101885637	uncharacterized LOC101885637		no
LOC101885638	uncharacterized LOC101885638		no
LOC101885645	uncharacterized LOC101885645		yes
LOC101885646	uncharacterized LOC101885646		no
LOC101885649	uncharacterized LOC101885649		no
LOC101885655	uncharacterized LOC101885655		no
LOC101885658	glutamate receptor ionotropic, kainate 2-like		yes
LOC101885664	uncharacterized LOC101885664		no
LOC101885675	RNA-binding protein 25-like		yes
LOC101885677	uncharacterized LOC101885677		no
LOC101885678	gastrula zinc finger protein XlCGF49.1-like		yes
LOC101885685	uncharacterized LOC101885685		yes
LOC101885686	uncharacterized LOC101885686		no
LOC101885687	uncharacterized LOC101885687		no
LOC101885690	platelet glycoprotein Ib alpha chain-like		yes
LOC101885703	microtubule-associated protein tau-like		yes
LOC101885705	uncharacterized LOC101885705		yes
LOC101885706	CMRF35-like molecule 3		yes
LOC101885708	uncharacterized LOC101885708		no
LOC101885711	uncharacterized LOC101885711		no
LOC101885723	uncharacterized LOC101885723		no
LOC101885725	neuronal cell adhesion molecule-like		yes
LOC101885726	mucin-2-like		yes
LOC101885758	uncharacterized LOC101885758		no
LOC101885764	disco-interacting protein 2 homolog C-like		yes
LOC101885765	ephrin type-A receptor 7-like		yes
LOC101885768	uncharacterized LOC101885768		no
LOC101885769	uncharacterized LOC101885769		no
LOC101885772	uncharacterized LOC101885772		no
LOC101885776	uncharacterized LOC101885776		no
LOC101885777	uncharacterized LOC101885777		no
LOC101885793	uncharacterized LOC101885793		no
LOC101885794	zinc finger CCHC domain-containing protein 12-like		yes
LOC101885801	uncharacterized LOC101885801		no
LOC101885805	mucin-2-like		yes
LOC101885807	uncharacterized LOC101885807		no
LOC101885809	uncharacterized LOC101885809		no
LOC101885813	uncharacterized LOC101885813		no
LOC101885829	uncharacterized LOC101885829		yes
LOC101885844	uncharacterized LOC101885844		yes
LOC101885857	centrosome-associated protein 350-like		yes
LOC101885859	uncharacterized LOC101885859		no
LOC101885862	uncharacterized LOC101885862		no
LOC101885863	ankyrin repeat and SAM domain-containing protein 1A-like		yes
LOC101885876	receptor-type tyrosine-protein phosphatase eta-like		yes
LOC101885882	uncharacterized LOC101885882		no
LOC101885885	uncharacterized LOC101885885		no
LOC101885890	uncharacterized LOC101885890		no
LOC101885893	putative nuclease HARBI1		yes
LOC101885894	gastrula zinc finger protein XlCGF49.1-like		yes
LOC101885896	uncharacterized LOC101885896		yes
LOC101885905	uncharacterized LOC101885905		no
LOC101885907	uncharacterized LOC101885907		no
LOC101885908	uncharacterized LOC101885908		no
LOC101885915	uncharacterized LOC101885915		no
LOC101885919	uncharacterized LOC101885919		no
LOC101885920	gastrula zinc finger protein XlCGF57.1-like		yes
LOC101885924	uncharacterized LOC101885924		no
LOC101885930	zinc finger BED domain-containing protein 4-like		yes
LOC101885934	uncharacterized LOC101885934		no
LOC101885938	neoverrucotoxin subunit alpha-like		yes
LOC101885940	uncharacterized LOC101885940		no
LOC101885942	uncharacterized LOC101885942		no
LOC101885945	uncharacterized LOC101885945		no
LOC101885947	uncharacterized LOC101885947		no
LOC101885949	uncharacterized LOC101885949		yes
LOC101885952	uncharacterized LOC101885952		no
LOC101885966	C2 calcium-dependent domain-containing protein 4C-like		yes
LOC101885970	uncharacterized LOC101885970		no
LOC101885976	uncharacterized LOC101885976		no
LOC101885979	desmocollin-2-like		yes
LOC101885980	uncharacterized LOC101885980		no
LOC101885981	uncharacterized LOC101885981		no
LOC101885989	uncharacterized LOC101885989		no
LOC101885990	interleukin-17 receptor A-like		yes
LOC101886002	intraflagellar transport protein 122 homolog		yes
LOC101886012	uncharacterized LOC101886012		no
LOC101886015	protein diaphanous homolog 1-like		yes
LOC101886023	uncharacterized LOC101886023		no
LOC101886029	uncharacterized LOC101886029		no
LOC101886033	vegetative cell wall protein gp1-like		yes
LOC101886035	uncharacterized LOC101886035		no
LOC101886038	mast/stem cell growth factor receptor kita-like		yes
LOC101886052	inactive dipeptidyl peptidase 10-like		yes
LOC101886071	uncharacterized LOC101886071		no
LOC101886077	transcription initiation factor TFIID subunit 4-like		yes
LOC101886078	uncharacterized LOC101886078		no
LOC101886083	rho-associated protein kinase 1-like		yes
LOC101886085	uncharacterized LOC101886085		no
LOC101886086	uncharacterized LOC101886086		yes
LOC101886113	uncharacterized LOC101886113		no
LOC101886114	uncharacterized LOC101886114		no
LOC101886116	uncharacterized LOC101886116		yes
LOC101886132	uncharacterized LOC101886132		no
LOC101886143	rho-associated protein kinase 1-like		yes
LOC101886155	uncharacterized LOC101886155		no
LOC101886158	uncharacterized LOC101886158		yes
LOC101886161	uncharacterized LOC101886161		no
LOC101886174	uncharacterized LOC101886174		no
LOC101886186	uncharacterized LOC101886186		yes
LOC101886187	zinc finger protein 525-like		yes
LOC101886193	uncharacterized LOC101886193		no
LOC101886196	voltage-dependent calcium channel beta subunit-associated regulatory protein-like		yes
LOC101886199	uncharacterized LOC101886199		no
LOC101886205	uncharacterized LOC101886205		yes
LOC101886229	uncharacterized LOC101886229		no
LOC101886239	coiled-coil domain-containing protein 74B-like		yes
LOC101886244	uncharacterized LOC101886244		no
LOC101886256	uncharacterized LOC101886256		yes
LOC101886261	periphilin-1-like		yes
LOC101886271	uncharacterized LOC101886271		no
LOC101886293	uncharacterized LOC101886293		yes
LOC101886295	uncharacterized LOC101886295		no
LOC101886318	uncharacterized LOC101886318		no
LOC101886337	uncharacterized LOC101886337		no
LOC101886339	uncharacterized LOC101886339		no
LOC101886340	anoctamin-1-like		yes
LOC101886347	uncharacterized LOC101886347		no
LOC101886362	uncharacterized LOC101886362		no
LOC101886363	gastrula zinc finger protein XlCGF57.1-like		yes
LOC101886375	uncharacterized LOC101886375		no
LOC101886376	uncharacterized LOC101886376		no
LOC101886390	uncharacterized LOC101886390		no
LOC101886403	uncharacterized LOC101886403		no
LOC101886407	uncharacterized LOC101886407		yes
LOC101886433	uncharacterized LOC101886433		no
LOC101886442	uncharacterized LOC101886442		yes
LOC101886447	ectonucleotide pyrophosphatase/phosphodiesterase family member 2-like		yes
LOC101886459	CD209 antigen-like protein C		yes
LOC101886465	uncharacterized LOC101886465		no
LOC101886471	uncharacterized LOC101886471		no
LOC101886485	uncharacterized LOC101886485		no
LOC101886488	mucin-2-like		yes
LOC101886492	uncharacterized LOC101886492		no
LOC101886493	uncharacterized LOC101886493		yes
LOC101886504	uncharacterized LOC101886504		yes
LOC101886518	uncharacterized LOC101886518		no
LOC101886519	coiled-coil domain-containing protein 177-like		yes
LOC101886528	coiled-coil domain-containing protein 106-like		yes
LOC101886530	uncharacterized LOC101886530		no
LOC101886547	G-protein coupled receptor 4-like		yes
LOC101886548	uncharacterized LOC101886548		no
LOC101886557	paraneoplastic antigen Ma1 homolog		yes
LOC101886565	serine/threonine-protein kinase pim-3-like		yes
LOC101886572	protein FAM13A-like		yes
LOC101886574	uncharacterized LOC101886574		no
LOC101886581	uncharacterized LOC101886581		no
LOC101886597	uncharacterized LOC101886597		no
LOC101886598	uncharacterized LOC101886598		no
LOC101886601	uncharacterized LOC101886601		yes
LOC101886621	endonuclease G, mitochondrial-like		yes
LOC101886630	uncharacterized LOC101886630		no
LOC101886634	uncharacterized LOC101886634		no
LOC101886638	uncharacterized LOC101886638		no
LOC101886642	iporin-like		yes
LOC101886653	kinesin-like protein KIF1A		yes
LOC101886654	A disintegrin and metalloproteinase with thrombospondin motifs 20-like		yes
LOC101886665	growth/differentiation factor 15		yes
LOC101886672	calphotin-like		yes
LOC101886687	uncharacterized LOC101886687		yes
LOC101886700	uncharacterized LOC101886700		yes
LOC101886703	uncharacterized LOC101886703		no
LOC101886704	uncharacterized LOC101886704		no
LOC101886706	uncharacterized LOC101886706		no
LOC101886712	gastrula zinc finger protein XlCGF57.1-like		yes
LOC101886719	uncharacterized LOC101886719		yes
LOC101886724	uncharacterized LOC101886724		no
LOC101886741	uncharacterized LOC101886741		yes
LOC101886748	uncharacterized LOC101886748		no
LOC101886751	uncharacterized LOC101886751		no
LOC101886756	uncharacterized LOC101886756		yes
LOC101886774	prolyl endopeptidase-like		yes
LOC101886777	predicted GPI-anchored protein 23		yes
LOC101886779	protein NLRC3-like		yes
LOC101886784	uncharacterized LOC101886784		yes
LOC101886786	methylosome protein 50-like		yes
LOC101886803	putative nuclease HARBI1		yes
LOC101886807	uncharacterized LOC101886807		no
LOC101886811	uncharacterized LOC101886811		no
LOC101886820	uncharacterized LOC101886820		yes
LOC101886821	uncharacterized LOC101886821		yes
LOC101886825	uncharacterized LOC101886825		no
LOC101886835	uncharacterized LOC101886835		yes
LOC101886843	uncharacterized LOC101886843		no
LOC101886853	mucin-2-like		yes
LOC101886868	uncharacterized LOC101886868		no
LOC101886882	uncharacterized LOC101886882		yes
LOC101886896	uncharacterized LOC101886896		yes
LOC101886897	zinc finger BED domain-containing protein 1-like		yes
LOC101886911	uncharacterized LOC101886911		no
LOC101886920	G-protein coupled receptor 98-like		yes
LOC101886923	uncharacterized LOC101886923		no
LOC101886926	uncharacterized LOC101886926		no
LOC101886928	uncharacterized LOC101886928		no
LOC101886929	oocyte zinc finger protein XlCOF19-like		yes
LOC101886933	adenylate cyclase type 2-like		yes
LOC101886946	uncharacterized LOC101886946		no
LOC101886954	uncharacterized LOC101886954		yes
LOC101886963	mucin-2-like		yes
LOC101886967	uncharacterized LOC101886967		no
LOC101886985	adhesion G protein-coupled receptor B2-like		yes
LOC101886997	uncharacterized LOC101886997		no
LOC101887000	IgGFc-binding protein-like		yes
LOC101887022	uncharacterized LOC101887022		no
LOC101887025	uncharacterized LOC101887025		no
LOC101887030	uncharacterized LOC101887030		no
LOC101887033	uncharacterized LOC101887033		no
LOC101887034	uncharacterized LOC101887034		no
LOC101887041	uncharacterized LOC101887041		no
LOC101887042	myb-related transcription factor, partner of profilin-like		yes
LOC101887043	uncharacterized LOC101887043		no
LOC101887064	uncharacterized LOC101887064		no
LOC101887068	uncharacterized LOC101887068		yes
LOC101887070	uncharacterized LOC101887070		no
LOC101887092	uncharacterized LOC101887092		no
LOC101887100	uncharacterized LOC101887100		yes
LOC101887104	uncharacterized LOC101887104		yes
LOC101887106	uncharacterized LOC101887106		no
LOC101887108	uncharacterized LOC101887108		no
LOC101887111	inhibin beta B chain-like		yes
LOC101887114	homer protein homolog 1-like		yes
LOC101887115	putative protein TPRXL		yes
LOC101887118	polyadenylate-binding protein 2-like		yes
LOC101887121	uncharacterized LOC101887121		no
LOC101887122	gastrula zinc finger protein XlCGF8.2DB-like		yes
LOC101887126	gastrula zinc finger protein XlCGF8.2DB-like		yes
LOC101887131	uncharacterized LOC101887131		no
LOC101887144	uncharacterized LOC101887144		yes
LOC101887156	probable E3 ubiquitin-protein ligase HECTD4		yes
LOC101887160	uncharacterized LOC101887160		no
LOC101887163	uncharacterized LOC101887163		no
LOC101887189	uncharacterized LOC101887189		yes
LOC103908636	protocadherin Fat 3-like		yes
LOC103908666	zinc finger protein 83-like		yes
LOC103908672	uncharacterized LOC103908672		yes
LOC103908683	uncharacterized LOC103908683		yes
LOC103908684	putative protein MSS51 homolog, mitochondrial		yes
LOC103908692	B-cell receptor CD22-like		yes
LOC103908707	uncharacterized LOC103908707		no
LOC103908713	vicilin-like seed storage protein At2g18540		yes
LOC103908723	immunoglobulin lambda-1 light chain	ZDB-GENE-111021-3	yes
LOC103908728	uncharacterized LOC103908728		no
LOC103908735	uncharacterized LOC103908735		no
LOC103908736	uncharacterized LOC103908736		no
LOC103908743	uncharacterized LOC103908743		no
LOC103908746	uncharacterized LOC103908746		no
LOC103908752	uncharacterized LOC103908752		no
LOC103908762	uncharacterized LOC103908762		yes
LOC103908767	uncharacterized LOC103908767		no
LOC103908786	uncharacterized LOC103908786		no
LOC103908800	uncharacterized LOC103908800		no
LOC103908802	uncharacterized LOC103908802		yes
LOC103908820	uncharacterized LOC103908820		no
LOC103908824	uncharacterized LOC103908824		yes
LOC103908832	uncharacterized LOC103908832		no
LOC103908836	uncharacterized LOC103908836		no
LOC103908843	uncharacterized LOC103908843		no
LOC103908846	uncharacterized LOC103908846		no
LOC103908857	uncharacterized LOC103908857		no
LOC103908858	uncharacterized LOC103908858		no
LOC103908871	uncharacterized LOC103908871		no
LOC103908875	uncharacterized LOC103908875		no
LOC103908877	zinc finger protein 239-like		yes
LOC103908883	uncharacterized LOC103908883		no
LOC103908890	uncharacterized LOC103908890		yes
LOC103908896	uncharacterized LOC103908896		no
LOC103908899	uncharacterized LOC103908899		no
LOC103908901	uncharacterized LOC103908901		no
LOC103908902	uncharacterized LOC103908902		no
LOC103908903	uncharacterized LOC103908903		no
LOC103908925	uncharacterized LOC103908925		yes
LOC103908927	uncharacterized LOC103908927		no
LOC103908933	uncharacterized LOC103908933		no
LOC103908936	uncharacterized LOC103908936		yes
LOC103908953	uncharacterized LOC103908953		no
LOC103908954	serine/threonine-protein kinase pim-2-like		yes
LOC103908955	uncharacterized LOC103908955		no
LOC103908956	uncharacterized LOC103908956		no
LOC103908959	uncharacterized LOC103908959		no
LOC103908961	uncharacterized LOC103908961		no
LOC103908968	uncharacterized LOC103908968		no
LOC103908970	uncharacterized LOC103908970		yes
LOC103908978	uncharacterized LOC103908978		no
LOC103908980	uncharacterized LOC103908980		no
LOC103908981	tumor suppressor candidate 5 homolog		yes
LOC103908985	uncharacterized LOC103908985		no
LOC103908992	serine/threonine-protein kinase pim-2-like		yes
LOC103908995	uncharacterized LOC103908995		no
LOC103908998	uncharacterized LOC103908998		no
LOC103909001	ER membrane protein complex subunit 7-like		yes
LOC103909006	uncharacterized LOC103909006		no
LOC103909016	uncharacterized LOC103909016		yes
LOC103909017	uncharacterized LOC103909017		no
LOC103909020	uncharacterized LOC103909020		no
LOC103909037	uncharacterized LOC103909037		no
LOC103909038	uncharacterized LOC103909038		no
LOC103909045	uncharacterized LOC103909045		no
LOC103909050	endonuclease domain-containing 1 protein	ZDB-GENE-030131-4651	yes
LOC103909067	uncharacterized LOC103909067		no
LOC103909069	lysine-specific demethylase 5B-B-like		yes
LOC103909072	uncharacterized LOC103909072		no
LOC103909099	uncharacterized LOC103909099		no
LOC103909107	uncharacterized LOC103909107		no
LOC103909112	uncharacterized LOC103909112		no
LOC103909115	uncharacterized LOC103909115		no
LOC103909118	prostaglandin D2 receptor 2-like		yes
LOC103909138	uncharacterized LOC103909138		no
LOC103909142	uncharacterized LOC103909142		no
LOC103909160	uncharacterized LOC103909160		no
LOC103909163	uncharacterized LOC103909163		no
LOC103909167	uncharacterized LOC103909167		no
LOC103909170	uncharacterized LOC103909170		no
LOC103909171	uncharacterized LOC103909171		no
LOC103909182	uncharacterized LOC103909182		no
LOC103909189	uncharacterized LOC103909189		no
LOC103909194	uncharacterized LOC103909194		yes
LOC103909195	uncharacterized LOC103909195		no
LOC103909209	uncharacterized LOC103909209		no
LOC103909212	zinc finger CCHC domain-containing protein 12-like		yes
LOC103909215	uncharacterized LOC103909215		no
LOC103909220	uncharacterized LOC103909220		no
LOC103909227	uncharacterized LOC103909227		no
LOC103909234	serine/threonine-protein kinase pim-2-like		yes
LOC103909239	uncharacterized LOC103909239		no
LOC103909249	GTPase IMAP family member 2-like		yes
LOC103909257	uncharacterized LOC103909257		no
LOC103909261	uncharacterized LOC103909261		no
LOC103909265	uncharacterized LOC103909265		no
LOC103909267	uncharacterized LOC103909267		no
LOC103909268	uncharacterized LOC103909268		no
LOC103909274	uncharacterized LOC103909274		no
LOC103909286	uncharacterized LOC103909286		no
LOC103909293	uncharacterized LOC103909293		no
LOC103909304	uncharacterized LOC103909304		no
LOC103909305	uncharacterized LOC103909305		no
LOC103909306	uncharacterized LOC103909306		yes
LOC103909309	uncharacterized LOC103909309		no
LOC103909315	uncharacterized LOC103909315		no
LOC103909323	uncharacterized LOC103909323		no
LOC103909333	uncharacterized LOC103909333		no
LOC103909344	uncharacterized LOC103909344		no
LOC103909373	uncharacterized LOC103909373		no
LOC103909376	uncharacterized LOC103909376		no
LOC103909379	uncharacterized LOC103909379		no
LOC103909380	uncharacterized LOC103909380		no
LOC103909381	uncharacterized LOC103909381		no
LOC103909382	uncharacterized LOC103909382		no
LOC103909387	uncharacterized LOC103909387		no
LOC103909388	uncharacterized LOC103909388		no
LOC103909390	adhesion G protein-coupled receptor E3-like		yes
LOC103909401	uncharacterized LOC103909401		no
LOC103909407	uncharacterized LOC103909407		no
LOC103909412	uncharacterized LOC103909412		no
LOC103909416	B-cell receptor CD22-like		yes
LOC103909419	sialoadhesin-like		yes
LOC103909421	titin homolog		yes
LOC103909442	sialic acid-binding Ig-like lectin 14		yes
LOC103909449	uncharacterized LOC103909449		no
LOC103909452	uncharacterized LOC103909452		no
LOC103909454	uncharacterized LOC103909454		no
LOC103909461	sialoadhesin-like		yes
LOC103909463	B-cell receptor CD22-like		yes
LOC103909465	uncharacterized LOC103909465		no
LOC103909466	uncharacterized LOC103909466		no
LOC103909470	probable E3 ubiquitin-protein ligase HECTD4		yes
LOC103909472	uncharacterized LOC103909472		yes
LOC103909475	uncharacterized LOC103909475		yes
LOC103909477	uncharacterized LOC103909477		yes
LOC103909479	uncharacterized LOC103909479		no
LOC103909484	uncharacterized LOC103909484		yes
LOC103909515	uncharacterized LOC103909515		no
LOC103909522	uncharacterized LOC103909522		no
LOC103909543	uncharacterized LOC103909543		yes
LOC103909549	uncharacterized LOC103909549		no
LOC103909551	uncharacterized LOC103909551		no
LOC103909565	uncharacterized LOC103909565		no
LOC103909567	uncharacterized LOC103909567		no
LOC103909575	uncharacterized LOC103909575		no
LOC103909581	uncharacterized LOC103909581		no
LOC103909593	uncharacterized LOC103909593		no
LOC103909602	uncharacterized LOC103909602		no
LOC103909615	uncharacterized LOC103909615		no
LOC103909616	uncharacterized LOC103909616		no
LOC103909620	uncharacterized LOC103909620		no
LOC103909625	uncharacterized LOC103909625		no
LOC103909634	uncharacterized LOC103909634		no
LOC103909640	5-hydroxytryptamine receptor 3A-like		yes
LOC103909642	uncharacterized LOC103909642		no
LOC103909650	uncharacterized LOC103909650		no
LOC103909664	uncharacterized LOC103909664		yes
LOC103909665	uncharacterized LOC103909665		no
LOC103909666	uncharacterized LOC103909666		no
LOC103909671	uncharacterized LOC103909671		no
LOC103909675	uncharacterized LOC103909675		no
LOC103909682	uncharacterized LOC103909682		no
LOC103909683	uncharacterized LOC103909683		no
LOC103909696	uncharacterized LOC103909696		no
LOC103909697	uncharacterized LOC103909697		no
LOC103909712	uncharacterized LOC103909712		no
LOC103909738	uncharacterized LOC103909738		no
LOC103909742	uncharacterized LOC103909742		no
LOC103909745	G2/M phase-specific E3 ubiquitin-protein ligase-like		yes
LOC103909749	uncharacterized LOC103909749		no
LOC103909757	cell wall protein IFF6-like		yes
LOC103909772	uncharacterized LOC103909772		no
LOC103909773	uncharacterized LOC103909773		no
LOC103909775	uncharacterized LOC103909775		no
LOC103909782	uncharacterized LOC103909782		no
LOC103909783	glutamate-rich protein 6-like		yes
LOC103909784	uncharacterized LOC103909784		yes
LOC103909787	uncharacterized LOC103909787		no
LOC103909796	golgin subfamily A member 6-like protein 2		yes
LOC103909798	uncharacterized LOC103909798		no
LOC103909803	uncharacterized LOC103909803		no
LOC103909804	cysteinyl leukotriene receptor 2-like		yes
LOC103909810	von Willebrand factor A domain-containing protein 5A-like		yes
LOC103909811	uncharacterized LOC103909811		no
LOC103909816	uncharacterized LOC103909816		no
LOC103909817	uncharacterized LOC103909817		no
LOC103909828	uncharacterized LOC103909828		yes
LOC103909840	uncharacterized LOC103909840		no
LOC103909841	uncharacterized LOC103909841		yes
LOC103909845	uncharacterized LOC103909845		yes
LOC103909850	uncharacterized LOC103909850		no
LOC103909851	uncharacterized LOC103909851		no
LOC103909861	uncharacterized LOC103909861		no
LOC103909865	uncharacterized LOC103909865		yes
LOC103909866	uncharacterized LOC103909866		yes
LOC103909867	uncharacterized LOC103909867		no
LOC103909868	uncharacterized LOC103909868		yes
LOC103909874	synaptotagmin-1-like	ZDB-GENE-060303-4	yes
LOC103909876	uncharacterized LOC103909876		no
LOC103909877	uncharacterized LOC103909877		yes
LOC103909885	paraneoplastic antigen Ma1 homolog		yes
LOC103909891	uncharacterized LOC103909891		no
LOC103909892	uncharacterized LOC103909892		no
LOC103909899	uncharacterized LOC103909899		no
LOC103909901	uncharacterized LOC103909901		no
LOC103909905	uncharacterized LOC103909905		no
LOC103909912	uncharacterized LOC103909912		yes
LOC103909913	uncharacterized LOC103909913		no
LOC103909918	uncharacterized LOC103909918		no
LOC103909926	NAD(P)(+)--arginine ADP-ribosyltransferase 2-like		yes
LOC103909928	uncharacterized LOC103909928		no
LOC103909932	kinesin-like protein kif7		yes
LOC103909933	uncharacterized LOC103909933		no
LOC103909937	protocadherin gamma-A11-like		yes
LOC103909940	uncharacterized LOC103909940		no
LOC103909944	uncharacterized LOC103909944		no
LOC103909945	nuclear export mediator factor NEMF		yes
LOC103909948	vascular endothelial growth factor receptor kdr-like		yes
LOC103909950	uncharacterized LOC103909950		no
LOC103909951	uncharacterized LOC103909951		no
LOC103909957	alpha-2-macroglobulin-like		yes
LOC103909958	sorting nexin-27-like		yes
LOC103909963	gastrula zinc finger protein XlCGF7.1-like		yes
LOC103909967	myoneurin-like		yes
LOC103909969	versican core protein-like		yes
LOC103909974	5-hydroxytryptamine receptor 3A-like		yes
LOC103909975	5-hydroxytryptamine receptor 3A-like		yes
LOC103909976	HEPACAM family member 2-like		yes
LOC103909978	WD repeat-containing protein 11-like		yes
LOC103909980	uncharacterized protein K02A2.6-like		yes
LOC103909982	programmed cell death protein 4-like		yes
LOC103909988	neuronal acetylcholine receptor subunit beta-2-like		yes
LOC103909989	uncharacterized LOC103909989		no
LOC103909991	uncharacterized LOC103909991		no
LOC103909997	uncharacterized LOC103909997		no
LOC103910002	transcription elongation regulator 1-like		yes
LOC103910003	short transient receptor potential channel 5		yes
LOC103910007	adhesion G protein-coupled receptor A1-like		yes
LOC103910008	acid-sensing ion channel 4-like		yes
LOC103910009	solute carrier family 2, facilitated glucose transporter member 9		yes
LOC103910010	protein AATF-like		yes
LOC103910011	uncharacterized LOC103910011		yes
LOC103910012	uncharacterized LOC103910012		no
LOC103910013	uncharacterized LOC103910013		no
LOC103910014	NLR family CARD domain-containing protein 3-like		yes
LOC103910017	uncharacterized LOC103910017		no
LOC103910018	uncharacterized LOC103910018		no
LOC103910022	uncharacterized LOC103910022		no
LOC103910025	mitotic checkpoint protein BUB3-like		yes
LOC103910031	60S ribosomal protein L6-like		yes
LOC103910032	uncharacterized LOC103910032		no
LOC103910046	uncharacterized LOC103910046		no
LOC103910049	uncharacterized LOC103910049		no
LOC103910072	uncharacterized LOC103910072		no
LOC103910098	complement C1q-like protein 3		yes
LOC103910100	uncharacterized LOC103910100		no
LOC103910101	antifreeze protein Maxi-like		yes
LOC103910115	uncharacterized LOC103910115		yes
LOC103910120	DNA-directed RNA polymerase subunit beta''-like		yes
LOC103910127	uncharacterized LOC103910127		no
LOC103910129	uncharacterized LOC103910129		no
LOC103910136	uncharacterized LOC103910136		no
LOC103910150	uncharacterized LOC103910150		yes
LOC103910155	uncharacterized LOC103910155		no
LOC103910166	uncharacterized LOC103910166		no
LOC103910192	uncharacterized LOC103910192		no
LOC103910193	uncharacterized LOC103910193		no
LOC103910194	uncharacterized LOC103910194		no
LOC103910196	uncharacterized LOC103910196		yes
LOC103910198	uncharacterized LOC103910198		no
LOC103910207	uncharacterized LOC103910207		no
LOC103910211	uncharacterized LOC103910211		yes
LOC103910213	dynein heavy chain-like		yes
LOC103910217	uncharacterized LOC103910217		no
LOC103910218	uncharacterized LOC103910218		no
LOC103910220	uncharacterized LOC103910220		yes
LOC103910221	uncharacterized LOC103910221		yes
LOC103910224	uncharacterized LOC103910224		no
LOC103910227	uncharacterized LOC103910227		no
LOC103910228	uncharacterized LOC103910228		no
LOC103910250	uncharacterized LOC103910250		no
LOC103910251	intestine-specific homeobox-like		yes
LOC103910253	uncharacterized LOC103910253		no
LOC103910254	uncharacterized LOC103910254		no
LOC103910259	uncharacterized LOC103910259		no
LOC103910263	uncharacterized LOC103910263		no
LOC103910264	stonustoxin subunit alpha-like		yes
LOC103910269	uncharacterized LOC103910269		no
LOC103910280	uncharacterized LOC103910280		no
LOC103910292	uncharacterized LOC103910292		no
LOC103910297	uncharacterized LOC103910297		no
LOC103910304	uncharacterized LOC103910304		yes
LOC103910306	uncharacterized LOC103910306		no
LOC103910311	uncharacterized LOC103910311		no
LOC103910313	uncharacterized LOC103910313		no
LOC103910314	uncharacterized LOC103910314		no
LOC103910315	uncharacterized LOC103910315		no
LOC103910319	G-protein coupled receptor 183-like		yes
LOC103910320	mas-related G-protein coupled receptor member X1-like		yes
LOC103910321	uncharacterized LOC103910321		no
LOC103910324	uncharacterized LOC103910324		no
LOC103910333	uncharacterized LOC103910333		no
LOC103910339	zinc-activated ligand-gated ion channel-like		yes
LOC103910356	uncharacterized LOC103910356		yes
LOC103910363	uncharacterized LOC103910363		no
LOC103910369	uncharacterized LOC103910369		no
LOC103910371	uncharacterized LOC103910371		no
LOC103910373	uncharacterized LOC103910373		no
LOC103910374	uncharacterized LOC103910374		no
LOC103910375	uncharacterized LOC103910375		no
LOC103910383	uncharacterized LOC103910383		no
LOC103910386	uncharacterized LOC103910386		no
LOC103910387	uncharacterized LOC103910387		no
LOC103910388	uncharacterized LOC103910388		no
LOC103910390	uncharacterized LOC103910390		no
LOC103910395	uncharacterized LOC103910395		no
LOC103910396	uncharacterized LOC103910396		no
LOC103910397	sterile alpha motif domain-containing protein 3-like		yes
LOC103910400	uncharacterized LOC103910400		no
LOC103910402	uncharacterized LOC103910402		no
LOC103910414	uncharacterized LOC103910414		no
LOC103910417	uncharacterized LOC103910417		no
LOC103910418	uncharacterized LOC103910418		no
LOC103910422	uncharacterized LOC103910422		no
LOC103910423	uncharacterized LOC103910423		no
LOC103910427	uncharacterized LOC103910427		no
LOC103910428	uncharacterized LOC103910428		no
LOC103910429	uncharacterized LOC103910429		no
LOC103910431	uncharacterized LOC103910431		no
LOC103910432	uncharacterized LOC103910432		no
LOC103910438	uncharacterized LOC103910438		no
LOC103910439	uncharacterized LOC103910439		no
LOC103910447	uncharacterized LOC103910447		no
LOC103910448	plexin-C1-like		yes
LOC103910453	uncharacterized LOC103910453		no
LOC103910470	gastrula zinc finger protein XlCGF57.1-like		yes
LOC103910480	uncharacterized LOC103910480		no
LOC103910489	uncharacterized LOC103910489		no
LOC103910500	uncharacterized LOC103910500		no
LOC103910508	uncharacterized LOC103910508		no
LOC103910518	uncharacterized LOC103910518		no
LOC103910521	uncharacterized LOC103910521		no
LOC103910524	gastrula zinc finger protein XlCGF7.1-like		yes
LOC103910528	gastrula zinc finger protein XlCGF57.1-like		yes
LOC103910531	uncharacterized LOC103910531		no
LOC103910533	uncharacterized LOC103910533		no
LOC103910537	uncharacterized LOC103910537		no
LOC103910551	uncharacterized LOC103910551		no
LOC103910552	uncharacterized LOC103910552		no
LOC103910559	uncharacterized LOC103910559		no
LOC103910565	uncharacterized LOC103910565		no
LOC103910575	PWWP domain-containing protein MUM1L1-like		yes
LOC103910580	prosaposin-like		yes
LOC103910588	uncharacterized LOC103910588		no
LOC103910589	uncharacterized LOC103910589		yes
LOC103910597	uncharacterized LOC103910597		no
LOC103910600	uncharacterized LOC103910600		no
LOC103910607	uncharacterized LOC103910607		no
LOC103910609	uncharacterized LOC103910609		no
LOC103910611	uncharacterized LOC103910611		no
LOC103910632	uncharacterized LOC103910632		no
LOC103910633	uncharacterized LOC103910633		yes
LOC103910637	uncharacterized LOC103910637		no
LOC103910638	uncharacterized LOC103910638		no
LOC103910643	uncharacterized LOC103910643		no
LOC103910644	uncharacterized LOC103910644		no
LOC103910645	uncharacterized LOC103910645		yes
LOC103910646	uncharacterized LOC103910646		no
LOC103910647	uncharacterized LOC103910647		no
LOC103910653	P2X purinoceptor 7-like		yes
LOC103910661	uncharacterized LOC103910661		no
LOC103910685	uncharacterized LOC103910685		no
LOC103910688	uncharacterized LOC103910688		no
LOC103910690	gastrula zinc finger protein XlCGF8.2DB-like		yes
LOC103910695	uncharacterized LOC103910695		yes
LOC103910713	uncharacterized LOC103910713		no
LOC103910718	uncharacterized LOC103910718		no
LOC103910719	uncharacterized LOC103910719		yes
LOC103910720	uncharacterized LOC103910720		no
LOC103910729	oocyte zinc finger protein XlCOF6-like		yes
LOC103910731	uncharacterized LOC103910731		yes
LOC103910736	uncharacterized LOC103910736		no
LOC103910738	uncharacterized LOC103910738		no
LOC103910740	uncharacterized LOC103910740		no
LOC103910741	uncharacterized LOC103910741		no
LOC103910742	uncharacterized LOC103910742		no
LOC103910744	uncharacterized LOC103910744		no
LOC103910749	gastrula zinc finger protein XlCGF8.2DB-like		yes
LOC103910756	uncharacterized LOC103910756		no
LOC103910760	uncharacterized LOC103910760		no
LOC103910763	uncharacterized LOC103910763		no
LOC103910778	uncharacterized LOC103910778		yes
LOC103910779	gastrula zinc finger protein XlCGF49.1-like		yes
LOC103910788	uncharacterized LOC103910788		no
LOC103910793	uncharacterized LOC103910793		no
LOC103910795	uncharacterized LOC103910795		no
LOC103910801	gastrula zinc finger protein XlCGF49.1-like		yes
LOC103910804	uncharacterized LOC103910804		no
LOC103910812	uncharacterized LOC103910812		yes
LOC103910818	uncharacterized LOC103910818		no
LOC103910819	uncharacterized LOC103910819		no
LOC103910825	gastrula zinc finger protein XlCGF57.1-like		yes
LOC103910827	uncharacterized LOC103910827		no
LOC103910836	uncharacterized LOC103910836		no
LOC103910840	uncharacterized LOC103910840		no
LOC103910847	uncharacterized LOC103910847		yes
LOC103910850	uncharacterized LOC103910850		no
LOC103910853	uncharacterized LOC103910853		yes
LOC103910855	uncharacterized LOC103910855		yes
LOC103910856	uncharacterized LOC103910856		no
LOC103910858	uncharacterized LOC103910858		no
LOC103910859	uncharacterized LOC103910859		no
LOC103910872	uncharacterized LOC103910872		no
LOC103910873	uncharacterized LOC103910873		no
LOC103910874	uncharacterized LOC103910874		no
LOC103910875	uncharacterized LOC103910875		yes
LOC103910876	uncharacterized LOC103910876		no
LOC103910878	uncharacterized LOC103910878		no
LOC103910880	uncharacterized LOC103910880		no
LOC103910883	uncharacterized LOC103910883		no
LOC103910891	uncharacterized LOC103910891		no
LOC103910894	uncharacterized LOC103910894		no
LOC103910902	potassium/sodium hyperpolarization-activated cyclic nucleotide-gated channel 3-like		yes
LOC103910903	uncharacterized LOC103910903		no
LOC103910906	uncharacterized LOC103910906		no
LOC103910907	uncharacterized LOC103910907		no
LOC103910909	uncharacterized LOC103910909		no
LOC103910915	uncharacterized LOC103910915		no
LOC103910918	tetratricopeptide repeat protein 24		yes
LOC103910933	uncharacterized LOC103910933		no
LOC103910934	uncharacterized LOC103910934		no
LOC103910935	uncharacterized LOC103910935		no
LOC103910939	uncharacterized LOC103910939		no
LOC103910944	uncharacterized LOC103910944		no
LOC103910948	uncharacterized LOC103910948		no
LOC103910959	uncharacterized LOC103910959		no
LOC103910960	uncharacterized LOC103910960		no
LOC103910981	uncharacterized LOC103910981		no
LOC103910984	uncharacterized LOC103910984		no
LOC103910988	uncharacterized LOC103910988		no
LOC103910995	uncharacterized LOC103910995		no
LOC103910996	uncharacterized LOC103910996		no
LOC103911004	membrane-spanning 4-domains subfamily A member 8-like		yes
LOC103911030	uncharacterized LOC103911030		no
LOC103911031	uncharacterized LOC103911031		no
LOC103911034	uncharacterized LOC103911034		no
LOC103911048	uncharacterized LOC103911048		no
LOC103911055	uncharacterized LOC103911055		no
LOC103911060	uncharacterized LOC103911060		no
LOC103911063	uncharacterized LOC103911063		no
LOC103911067	uncharacterized LOC103911067		no
LOC103911076	uncharacterized LOC103911076		no
LOC103911081	uncharacterized LOC103911081		no
LOC103911089	uncharacterized LOC103911089		no
LOC103911090	uncharacterized LOC103911090		no
LOC103911100	uncharacterized LOC103911100		no
LOC103911107	general transcription factor II-I repeat domain-containing protein 2-like		yes
LOC103911111	uncharacterized LOC103911111		no
LOC103911115	uncharacterized LOC103911115		no
LOC103911119	uncharacterized LOC103911119		yes
LOC103911141	uncharacterized LOC103911141		no
LOC103911153	uncharacterized LOC103911153		no
LOC103911161	uncharacterized LOC103911161		yes
LOC103911170	uncharacterized LOC103911170		no
LOC103911173	uncharacterized LOC103911173		no
LOC103911176	uncharacterized LOC103911176		no
LOC103911178	dynein heavy chain 5, axonemal-like		yes
LOC103911188	uncharacterized LOC103911188		no
LOC103911196	uncharacterized LOC103911196		no
LOC103911201	uncharacterized LOC103911201		no
LOC103911203	uncharacterized LOC103911203		no
LOC103911204	uncharacterized LOC103911204		no
LOC103911205	uncharacterized LOC103911205		no
LOC103911207	uncharacterized LOC103911207		no
LOC103911208	gelsolin-related protein of 125 kDa-like		yes
LOC103911209	uncharacterized protein KIAA1211 homolog		yes
LOC103911210	uncharacterized LOC103911210		yes
LOC103911216	uncharacterized LOC103911216		no
LOC103911255	uncharacterized LOC103911255		no
LOC103911264	uncharacterized LOC103911264		no
LOC103911269	uncharacterized LOC103911269		no
LOC103911277	uncharacterized LOC103911277		yes
LOC103911280	uncharacterized LOC103911280		no
LOC103911284	dehydrogenase/reductase SDR family member on chromosome X-like		yes
LOC103911288	uncharacterized LOC103911288		no
LOC103911289	uncharacterized LOC103911289		no
LOC103911290	uncharacterized LOC103911290		no
LOC103911313	uncharacterized LOC103911313		no
LOC103911318	uncharacterized LOC103911318		no
LOC103911320	uncharacterized LOC103911320		no
LOC103911324	uncharacterized LOC103911324		no
LOC103911335	uncharacterized LOC103911335		no
LOC103911338	uncharacterized LOC103911338		no
LOC103911346	uncharacterized LOC103911346		no
LOC103911361	zinc finger protein 501-like		yes
LOC103911363	uncharacterized LOC103911363		no
LOC103911388	uncharacterized LOC103911388		no
LOC103911404	uncharacterized LOC103911404		no
LOC103911420	uncharacterized LOC103911420		no
LOC103911423	uncharacterized LOC103911423		no
LOC103911428	uncharacterized LOC103911428		no
LOC103911430	uncharacterized LOC103911430		no
LOC103911431	uncharacterized LOC103911431		no
LOC103911447	uncharacterized LOC103911447		no
LOC103911450	protein-lysine 6-oxidase-like		yes
LOC103911451	uncharacterized LOC103911451		no
LOC103911458	uncharacterized LOC103911458		no
LOC103911468	uncharacterized LOC103911468		no
LOC103911482	uncharacterized LOC103911482		no
LOC103911483	uncharacterized LOC103911483		no
LOC103911485	uncharacterized LOC103911485		no
LOC103911487	golgin subfamily A member 6-like protein 1		yes
LOC103911491	uncharacterized LOC103911491		no
LOC103911493	adhesion G-protein coupled receptor G6-like		yes
LOC103911494	uncharacterized LOC103911494		no
LOC103911495	uncharacterized LOC103911495		no
LOC103911517	uncharacterized LOC103911517		yes
LOC103911518	uncharacterized LOC103911518		no
LOC103911521	uncharacterized LOC103911521		no
LOC103911527	uncharacterized LOC103911527		no
LOC103911530	uncharacterized LOC103911530		yes
LOC103911534	uncharacterized LOC103911534		no
LOC103911545	uncharacterized LOC103911545		no
LOC103911550	uncharacterized LOC103911550		no
LOC103911551	uncharacterized LOC103911551		no
LOC103911561	uncharacterized LOC103911561		no
LOC103911563	uncharacterized LOC103911563		no
LOC103911570	uncharacterized LOC103911570		no
LOC103911573	uncharacterized LOC103911573		no
LOC103911582	gelsolin-related protein of 125 kDa-like		yes
LOC103911588	gastrula zinc finger protein XlCGF8.2DB-like		yes
LOC103911600	uncharacterized LOC103911600		no
LOC103911601	uncharacterized LOC103911601		no
LOC103911603	uncharacterized LOC103911603		no
LOC103911612	interleukin-6 receptor subunit beta-like		yes
LOC103911615	uncharacterized LOC103911615		no
LOC103911624	p53-induced death domain-containing protein 1	ZDB-GENE-030131-3700	yes
LOC103911631	uncharacterized LOC103911631		no
LOC103911633	uncharacterized LOC103911633		no
LOC103911641	uncharacterized LOC103911641		no
LOC103911649	uncharacterized LOC103911649		yes
LOC103911652	uncharacterized LOC103911652		no
LOC103911653	uncharacterized LOC103911653		no
LOC103911663	uncharacterized LOC103911663		no
LOC103911664	serine/threonine-protein kinase pim-2-like		yes
LOC103911683	uncharacterized LOC103911683		no
LOC103911686	uncharacterized LOC103911686		no
LOC103911696	uncharacterized LOC103911696		no
LOC103911701	uncharacterized LOC103911701		no
LOC103911705	uncharacterized LOC103911705		no
LOC103911707	uncharacterized LOC103911707		no
LOC103911713	uncharacterized LOC103911713		no
LOC103911715	protein ALP1-like		yes
LOC103911722	interaptin-like		yes
LOC103911723	CD209 antigen-like protein E		yes
LOC103911727	uncharacterized LOC103911727		no
LOC103911728	uncharacterized LOC103911728		no
LOC103911739	uncharacterized LOC103911739		no
LOC103911745	asialoglycoprotein receptor 1-like		yes
LOC103911773	uncharacterized LOC103911773		no
LOC103911774	uncharacterized LOC103911774		no
LOC103911776	uncharacterized LOC103911776		yes
LOC103911788	uncharacterized LOC103911788		no
LOC103911803	uncharacterized LOC103911803		no
LOC103911808	uncharacterized LOC103911808		no
LOC103911814	uncharacterized LOC103911814		no
LOC103911818	uncharacterized LOC103911818		no
LOC103911819	uncharacterized LOC103911819		yes
LOC103911822	uncharacterized LOC103911822		no
LOC103911828	uncharacterized LOC103911828		no
LOC103911829	uncharacterized LOC103911829		no
LOC103911830	uncharacterized LOC103911830		no
LOC103911838	uncharacterized LOC103911838		no
LOC103911848	uncharacterized LOC103911848		no
LOC103911880	uncharacterized LOC103911880		no
LOC103911885	uncharacterized LOC103911885		no
LOC103911895	endonuclease domain-containing 1 protein-like		yes
LOC103911899	uncharacterized LOC103911899		no
LOC103911903	uncharacterized LOC103911903		no
LOC103911910	uncharacterized LOC103911910		yes
LOC103911913	uncharacterized LOC103911913		no
LOC103911920	uncharacterized LOC103911920		no
LOC103911924	uncharacterized LOC103911924		no
LOC103911938	uncharacterized LOC103911938		no
LOC103911943	uncharacterized LOC103911943		no
LOC103911951	uncharacterized LOC103911951		no
LOC103911953	uncharacterized LOC103911953		yes
LOC103911961	uncharacterized LOC103911961		no
LOC103911968	poly(ADP-ribose) glycohydrolase-like		yes
LOC103911969	serine/threonine-protein phosphatase 4 regulatory subunit 3-like		yes
LOC103911986	uncharacterized LOC103911986		no
LOC103911992	uncharacterized LOC103911992		no
LOC103911993	uncharacterized LOC103911993		no
LOC103911994	uncharacterized LOC103911994		no
LOC103911995	uncharacterized LOC103911995		no
LOC103911996	uncharacterized LOC103911996		no
LOC103912003	uncharacterized LOC103912003		no
LOC103912005	uncharacterized LOC103912005		no
LOC103912018	uncharacterized LOC103912018		no
LOC103912023	uncharacterized LOC103912023		no
LOC103912024	uncharacterized LOC103912024		no
LOC103912033	uncharacterized LOC103912033		no
LOC103912040	uncharacterized LOC103912040		yes
LOC103912041	uncharacterized LOC103912041		no
LOC103912042	uncharacterized LOC103912042		no
LOC103912043	uncharacterized LOC103912043		no
LOC103912045	uncharacterized LOC103912045		yes
LOC103912051	uncharacterized LOC103912051		no
LOC103912062	uncharacterized LOC103912062		yes
LOC103912071	uncharacterized LOC103912071		no
LOC103912072	cell surface glycoprotein 1-like	ZDB-GENE-050506-122	yes
LOC108179023	translation initiation factor eIF-2B subunit epsilon-like		yes
LOC108179035	phosphoribosyl pyrophosphate synthase-associated protein 1-like		yes
LOC108179036	uncharacterized LOC108179036		no
LOC108179074	uncharacterized LOC108179074		no
LOC108179085	uncharacterized LOC108179085		yes
LOC108179099	junctional adhesion molecule-like		yes
LOC108179115	uncharacterized LOC108179115		yes
LOC108179133	polymeric immunoglobulin receptor-like		yes
LOC108179139	uncharacterized LOC108179139		no
LOC108179142	uncharacterized LOC108179142		no
LOC108179158	uncharacterized LOC108179158		yes
LOC108179166	uncharacterized LOC108179166		yes
LOC108179200	major histocompatibility complex class I-related gene protein-like		yes
LOC108179220	vimentin-like		yes
LOC108179225	uncharacterized LOC108179225		yes
LOC108179227	leucine-rich repeat extensin-like protein 3		yes
LOC108179228	secretory phospholipase A2 receptor-like		yes
LOC108179246	coiled-coil domain-containing protein 106-like		yes
LOC108179343	uncharacterized LOC108179343		no
LOC108179354	uncharacterized LOC108179354		yes
LOC108179355	zinc finger protein 239-like		yes
LOC108179356	zinc finger protein 239-like		yes
LOC108179500	uncharacterized LOC108179500		no
LOC108179509	uncharacterized protein K02A2.6-like		yes
LOC108179511	myosin light chain kinase, smooth muscle-like		yes
LOC108179520	uncharacterized LOC108179520		no
LOC108179526	uncharacterized LOC108179526		no
LOC108179531	uncharacterized LOC108179531		no
LOC108179554	uncharacterized LOC108179554		yes
LOC108179555	dual specificity phosphatase DUPD1-like		yes
LOC108179556	uncharacterized LOC108179556		no
LOC108179558	uncharacterized LOC108179558		no
LOC108179593	uncharacterized LOC108179593		no
LOC108179594	uncharacterized LOC108179594		no
LOC108179621	uncharacterized LOC108179621		yes
LOC108179628	uncharacterized LOC108179628		no
LOC108179630	uncharacterized LOC108179630		no
LOC108179633	uncharacterized LOC108179633		no
LOC108179634	uncharacterized LOC108179634		no
LOC108179637	uncharacterized LOC108179637		no
LOC108179640	uncharacterized LOC108179640		yes
LOC108179652	uncharacterized LOC108179652		no
LOC108179656	uncharacterized LOC108179656		no
LOC108179658	uncharacterized LOC108179658		no
LOC108179660	CREB-regulated transcription coactivator 2-like		yes
LOC108179664	serine/threonine-protein kinase pim-2-like		yes
LOC108179687	uncharacterized LOC108179687		yes
LOC108179692	uncharacterized LOC108179692		no
LOC108179710	uncharacterized LOC108179710		no
LOC108179722	uncharacterized LOC108179722		no
LOC108179735	uncharacterized LOC108179735		no
LOC108179775	uncharacterized LOC108179775		no
LOC108179776	uncharacterized LOC108179776		no
LOC108179777	uncharacterized LOC108179777		no
LOC108179780	uncharacterized LOC108179780		no
LOC108179784	uncharacterized LOC108179784		no
LOC108179796	uncharacterized LOC108179796		no
LOC108179803	uncharacterized LOC108179803		no
LOC108179813	uncharacterized LOC108179813		no
LOC108179947	uncharacterized LOC108179947		no
LOC108179963	uncharacterized LOC108179963		no
LOC108179989	uncharacterized LOC108179989		yes
LOC108179992	uncharacterized LOC108179992		yes
LOC108179993	zinc finger BED domain-containing protein 1-like		yes
LOC108180010	E3 ubiquitin-protein ligase RBBP6-like		yes
LOC108180012	uncharacterized LOC108180012		no
LOC108180013	uncharacterized LOC108180013		no
LOC108180016	zinc finger BED domain-containing protein 1-like		yes
LOC108180017	uncharacterized LOC108180017		no
LOC108180033	uncharacterized LOC108180033		no
LOC108180038	uncharacterized LOC108180038		yes
LOC108180041	uncharacterized LOC108180041		no
LOC108180065	uncharacterized LOC108180065		no
LOC108180073	uncharacterized LOC108180073		no
LOC108180076	uncharacterized LOC108180076		no
LOC108180087	uncharacterized LOC108180087		no
LOC108180091	uncharacterized LOC108180091		no
LOC108180102	uncharacterized LOC108180102		no
LOC108180103	uncharacterized LOC108180103		no
LOC108180110	uncharacterized LOC108180110		no
LOC108180112	uncharacterized LOC108180112		no
LOC108180115	serine/threonine-protein kinase pim-2-like		yes
LOC108180121	uncharacterized LOC108180121		no
LOC108180123	uncharacterized LOC108180123		no
LOC108180131	uncharacterized LOC108180131		no
LOC108180138	uncharacterized LOC108180138		no
LOC108180139	uncharacterized LOC108180139		no
LOC108180142	uncharacterized LOC108180142		no
LOC108180164	uncharacterized LOC108180164		yes
LOC108180169	uncharacterized LOC108180169		yes
LOC108180186	uncharacterized LOC108180186		no
LOC108180193	uncharacterized LOC108180193		no
LOC108180196	uncharacterized LOC108180196		yes
LOC108180199	uncharacterized LOC108180199		yes
LOC108180204	uncharacterized LOC108180204		no
LOC108180218	uncharacterized LOC108180218		no
LOC108180223	uncharacterized LOC108180223		no
LOC108180226	uncharacterized LOC108180226		no
LOC108180238	uncharacterized LOC108180238		no
LOC108180239	uncharacterized LOC108180239		no
LOC108180241	uncharacterized LOC108180241		no
LOC108180244	uncharacterized LOC108180244		no
LOC108180259	uncharacterized LOC108180259		no
LOC108180265	uncharacterized LOC108180265		no
LOC108180270	enhancer of split m7 protein-like		yes
LOC108180286	MAX gene-associated protein-like	ZDB-GENE-200330-1	yes
LOC108180340	serine/threonine-protein kinase pim-3-like		yes
LOC108180351	uncharacterized LOC108180351		yes
LOC108180355	uncharacterized LOC108180355		no
LOC108180715	cullin-5-like		yes
LOC108180719	zinc finger CCHC domain-containing protein 12-like		yes
LOC108180720	probable E3 ubiquitin-protein ligase HECTD4		yes
LOC108180723	probable E3 ubiquitin-protein ligase HECTD4		yes
LOC108180727	deubiquitinase and deneddylase Dub1		yes
LOC108180734	uncharacterized LOC108180734		no
LOC108180743	uncharacterized LOC108180743		no
LOC108180774	uncharacterized LOC108180774		no
LOC108180776	uncharacterized LOC108180776		no
LOC108180802	uncharacterized LOC108180802		no
LOC108180805	uncharacterized LOC108180805		no
LOC108180813	uncharacterized LOC108180813		no
LOC108180814	uncharacterized LOC108180814		no
LOC108180815	uncharacterized LOC108180815		no
LOC108181081	pumilio homolog 1-like		yes
LOC108181101	uncharacterized LOC108181101		no
LOC108181104	leukotriene B4 receptor 1-like		yes
LOC108181115	uncharacterized LOC108181115		no
LOC108181163	uncharacterized LOC108181163		no
LOC108181171	uncharacterized LOC108181171		no
LOC108181229	uncharacterized LOC108181229		no
LOC108181391	P cell-type agglutination protein map4-like		yes
LOC108181407	uncharacterized LOC108181407		no
LOC108181409	uncharacterized LOC108181409		no
LOC108181419	uncharacterized LOC108181419		no
LOC108181454	uncharacterized LOC108181454		no
LOC108181461	uncharacterized LOC108181461		no
LOC108181470	uncharacterized LOC108181470		no
LOC108181471	uncharacterized LOC108181471		no
LOC108181495	uncharacterized LOC108181495		no
LOC108181502	uncharacterized LOC108181502		no
LOC108181504	uncharacterized LOC108181504		no
LOC108181518	uncharacterized LOC108181518		no
LOC108181546	uncharacterized LOC108181546		no
LOC108181551	uncharacterized LOC108181551		no
LOC108181556	uncharacterized LOC108181556		no
LOC108181560	uncharacterized LOC108181560		no
LOC108181582	intestinal mucin-like protein		yes
LOC108181589	uncharacterized LOC108181589		yes
LOC108181591	uncharacterized LOC108181591		yes
LOC108181592	GRAM domain-containing protein 2-like		yes
LOC108181595	uncharacterized LOC108181595		no
LOC108181606	uncharacterized LOC108181606		no
LOC108181673	uncharacterized LOC108181673		no
LOC108181677	uncharacterized LOC108181677		no
LOC108181760	gastrula zinc finger protein XlCGF8.2DB-like		yes
LOC108181893	uncharacterized LOC108181893		no
LOC108181940	uncharacterized LOC108181940		yes
LOC108181943	lysine-rich arabinogalactan protein 19-like		yes
LOC108182123	uncharacterized LOC108182123		no
LOC108182168	uncharacterized LOC108182168		no
LOC108182213	uncharacterized LOC108182213		yes
LOC108182214	uncharacterized LOC108182214		no
LOC108182217	uncharacterized LOC108182217		no
LOC108182230	uncharacterized LOC108182230		no
LOC108182237	uncharacterized LOC108182237		yes
LOC108182241	zinc finger C3H1 domain-containing protein-like		yes
LOC108182242	uncharacterized LOC108182242		yes
LOC108182290	gastrula zinc finger protein XlCGF8.2DB-like		yes
LOC108182316	uncharacterized LOC108182316		no
LOC108182317	uncharacterized LOC108182317		no
LOC108182323	gastrula zinc finger protein XlCGF57.1-like		yes
LOC108182329	gastrula zinc finger protein XlCGF17.1-like		yes
LOC108182331	rho-associated protein kinase 2-like		yes
LOC108182396	uncharacterized LOC108182396		no
LOC108182398	uncharacterized LOC108182398		no
LOC108182399	uncharacterized LOC108182399		yes
LOC108182400	uncharacterized LOC108182400		yes
LOC108182421	uncharacterized LOC108182421		no
LOC108182424	gastrula zinc finger protein XlCGF57.1-like		yes
LOC108182461	mucin-2-like		yes
LOC108182464	uncharacterized LOC108182464		no
LOC108182472	uncharacterized LOC108182472		no
LOC108182486	gastrula zinc finger protein XlCGF8.2DB-like		no
LOC108182487	uncharacterized LOC108182487		yes
LOC108182577	uncharacterized LOC108182577		no
LOC108182616	uncharacterized LOC108182616		no
LOC108182660	uncharacterized LOC108182660		no
LOC108182671	uncharacterized LOC108182671		no
LOC108182673	uncharacterized LOC108182673		no
LOC108182677	uncharacterized LOC108182677		yes
LOC108182681	uncharacterized LOC108182681		yes
LOC108182684	inhibitor of nuclear factor kappa-B kinase subunit beta-like		yes
LOC108182721	gastrula zinc finger protein XlCGF57.1-like		yes
LOC108182761	uncharacterized LOC108182761		yes
LOC108182762	serine/arginine repetitive matrix protein 2-like		yes
LOC108182766	GTPase IMAP family member 4-like		yes
LOC108182767	trichohyalin-like		yes
LOC108182771	T-cell ecto-ADP-ribosyltransferase 1-like		yes
LOC108182776	interferon-induced very large GTPase 1-like	ZDB-GENE-170823-1	yes
LOC108182781	proline-rich protein 36-like		yes
LOC108182782	adhesion G protein-coupled receptor E1-like		yes
LOC108182785	vicilin-like seed storage protein At2g18540		yes
LOC108182795	gastrula zinc finger protein XlCGF7.1-like		yes
LOC108182798	uncharacterized LOC108182798		yes
LOC108182851	CD97 antigen-like		yes
LOC108182857	uncharacterized LOC108182857		no
LOC108182865	uncharacterized LOC108182865		no
LOC108182870	uncharacterized LOC108182870		no
LOC108182875	uncharacterized LOC108182875		no
LOC108182890	uncharacterized LOC108182890		no
LOC108182911	uncharacterized LOC108182911		no
LOC108182912	uncharacterized LOC108182912		no
LOC108182916	uncharacterized LOC108182916		no
LOC108182922	uncharacterized LOC108182922		no
LOC108182924	interferon-induced very large GTPase 1-like		yes
LOC108182930	uncharacterized LOC108182930		no
LOC108183289	plexin-C1-like		yes
[truncated: 1,166 more rows]

## Sheet: 3 gffcomp tmap Ens95 as ref
ref_gene_id	ref_id	class_code	qry_gene_id	qry_id
rpl24	ENSDART00000164359	=	rpl24	NM_173235.3
cep97	ENSDART00000166393	j	cep97	XR_001800919.2
cep97	ENSDART00000166393	j	cep97	XM_009305058.3
cep97	ENSDART00000166393	=	cep97	NM_198371.2
nfkbiz	ENSDART00000172454	j	nfkbiz	XM_021475913.1
nfkbiz	ENSDART00000172454	j	nfkbiz	XM_021475912.1
nfkbiz	ENSDART00000172454	=	nfkbiz	XM_021475911.1
nfkbiz	ENSDART00000172454	k	nfkbiz	XR_002458711.1
eed	ENSDART00000162928	=	eed	NM_001017766.2
hikeshi	ENSDART00000169685	=	hikeshi	NM_001017577.1
tmem39a	ENSDART00000168091	=	tmem39a	NM_199632.1
ildr1a	ENSDART00000168428	=	ildr1a	NM_200393.1
si:zfos-1011f11.2	ENSDART00000168609	k	LOC100332762	XM_021475915.1
si:zfos-1011f11.2	ENSDART00000168609	k	LOC100332762	XM_021475914.1
si:zfos-1011f11.2	ENSDART00000168609	k	LOC100332762	XM_021475916.1
gpa33a	ENSDART00000165650	=	si:zfos-1011f11.1	NM_001115105.2
gpa33a	ENSDART00000165650	j	si:zfos-1011f11.1	XM_021470602.1
gpa33a	ENSDART00000165267	=	si:zfos-1011f11.1	XM_017353526.2
F7 (1 of many)	ENSDART00000165402	=	zgc:163025	NM_001089558.2
f7	ENSDART00000013209	=	f7	NM_131819.2
f7i	ENSDART00000003463	=	f7i	NM_173228.1
f10	ENSDART00000124837	=	f10	NM_201462.3
prozb	ENSDART00000064061	=	prozb	NM_001326520.1
pcid2	ENSDART00000018741	=	pcid2	NM_001007381.2
pcid2	ENSDART00000018741	j	pcid2	XM_005168000.4
cul4a	ENSDART00000152205	k	cul4a	NM_201027.1
lamp1a	ENSDART00000160425	j	zgc:64072	NM_199702.1
grtp1a	ENSDART00000164091	j	grtp1a	XM_021470179.1
grtp1a	ENSDART00000164091	=	grtp1a	NM_213402.1
adprhl1	ENSDART00000060968	j	adprhl1	XM_021473006.1
adprhl1	ENSDART00000060968	j	adprhl1	XM_005167996.4
FO681286.1	ENSDART00000188956	n	adprhl1	XM_021473081.1
adprhl1	ENSDART00000060968	j	adprhl1	NM_001006033.1
dcun1d2b	ENSDART00000060971	j	dcun1d2b	NM_001002156.1
dcun1d2b	ENSDART00000060971	m	dcun1d2b	XM_021470827.1
tmco3	ENSDART00000109529	j	tmco3	XM_021475917.1
tfdp1b	ENSDART00000003317	j	tfdp1b	XM_005167988.4
tfdp1b	ENSDART00000003317	j	tfdp1b	XM_009305148.3
tfdp1b	ENSDART00000003317	=	tfdp1b	NM_200776.2
grk1a	ENSDART00000081743	=	grk1a	NM_001034181.2
cenpe	ENSDART00000111806	j	cenpe	XM_017355770.2
cenpe	ENSDART00000111806	j	cenpe	XM_005168005.4
cenpe	ENSDART00000111806	j	cenpe	XM_005168006.4
cenpe	ENSDART00000111806	=	cenpe	NM_001327759.1
-	-	u	tmem255b	XM_009305260.3
-	-	u	LOC108187164	XR_001799159.2
gas6	ENSDART00000010092	=	gas6	NM_199978.1
pros1	ENSDART00000098627	=	pros1	NM_001077323.1
rasa3	ENSDART00000092524	j	rasa3	XM_009305228.3
rasa3	ENSDART00000092524	j	rasa3	XM_009305232.3
rasa3	ENSDART00000092524	j	rasa3	XM_009305229.3
rasa3	ENSDART00000092524	=	rasa3	XM_009305235.3
tpp2	ENSDART00000152173	j	tpp2	XM_002660321.6
tpp2	ENSDART00000152173	=	tpp2	XM_005168010.4
tpp2	ENSDART00000152173	j	tpp2	XM_005168011.4
tpp2	ENSDART00000152173	x	LOC100149425	XM_021475919.1
si:ch73-244f7.3	ENSDART00000152799	j	LOC100149425	XM_009305246.3
si:ch73-244f7.3	ENSDART00000152799	k	LOC100149425	XM_021475918.1
si:ch73-244f7.3	ENSDART00000152799	k	LOC100149425	XM_021475922.1
si:ch73-244f7.3	ENSDART00000152799	k	LOC100149425	XM_021475920.1
si:ch73-244f7.3	ENSDART00000152799	k	LOC100149425	XM_021475921.1
zgc:92518	ENSDART00000152684	=	zgc:92518	NM_001002361.2
ercc5	ENSDART00000144406	=	ercc5	XM_003197605.5
blzf1	ENSDART00000108579	=	blzf1	NM_001144803.1
blzf1	ENSDART00000108579	j	blzf1	XM_021476915.1
trmt10c	ENSDART00000144606	=	trmt10c	NM_001007332.2
txnl4b	ENSDART00000081945	j	txnl4b	XM_021475835.1
txnl4b	ENSDART00000109083	=	txnl4b	NM_001290146.1
txnl4b	ENSDART00000081945	=	txnl4b	NM_001037123.3
si:ch73-41e3.7	ENSDART00000147610	j	si:ch73-41e3.7	XM_017355601.2
si:ch73-41e3.7	ENSDART00000147610	=	si:ch73-41e3.7	NM_001145612.1
mrpl16	ENSDART00000102421	=	mrpl16	XM_005168001.4
mrpl16	ENSDART00000102421	=	mrpl16	NM_001007764.1
mrpl39	ENSDART00000179731	=	cenpq	NM_001328008.1
CU571081.1	ENSDART00000184316	=	LOC101885604	XM_005168015.4
dre-mir-155	ENSDART00000116068	=	mir155	NR_030099.1
mrpl39	ENSDART00000147633	=	mrpl39	NM_199915.3
jam2a	ENSDART00000166731	j	jam2a	NM_001098264.1
atp5pf	ENSDART00000004062	=	atp5j	NM_213307.1
atp5pf	ENSDART00000147937	=	atp5j	XM_017352984.2
atp5pf	ENSDART00000134456	=	atp5j	XM_005167990.4
atp5pf	ENSDART00000134456	j	atp5j	XM_017352970.2
appa	ENSDART00000166786	j	appa	NM_131564.2
cyyr1	ENSDART00000160564	=	cyyr1	NM_212882.2
adamts1	ENSDART00000165894	m	adamts1	XM_021475923.1
adamts1	ENSDART00000165894	j	adamts1	XM_021475924.1
adamts5	ENSDART00000161072	=	adamts5	NM_001302231.1
n6amt1	ENSDART00000184660	=	n6amt1	NM_001002502.1
gart	ENSDART00000172235	j	gart	NM_131617.1
-	-	u	LOC100332351	XM_002666980.4
-	-	u	LOC101886071	XR_224683.4
-	-	u	LOC101886071	XR_001796391.2
CZQB01066256.1	ENSDART00000194139	j	donson	XM_021475897.1
runx1	ENSDART00000130697	j	runx1	NM_131603.2
runx1	ENSDART00000130697	=	runx1	XM_021475829.1
runx1	ENSDART00000130697	j	runx1	XM_021475832.1
dre-mir-459	ENSDART00000118322	=	mir459	NR_039328.1
urp2	ENSDART00000097626	=	urp2	NM_001082942.1
clic6	ENSDART00000176787	j	LOC100333907	XM_009305281.3
atp1a1a.4	ENSDART00000048828	=	atp1a1a.4	NM_131689.1
atp1a1a.1	ENSDART00000081047	=	atp1a1a.1	NM_131686.1
atp1a1a.1	ENSDART00000147682	i	LOC108187381	XR_001799161.2
atp1a1a.2	ENSDART00000006449	=	atp1a1a.2	NM_131687.1
atp1a1a.3	ENSDART00000103850	=	atp1a1a.3	NM_131688.1
atp1a1a.5	ENSDART00000006013	=	atp1a1a.5	NM_178099.2
si:ch211-132g1.3	ENSDART00000131675	j	si:ch211-132g1.3	XM_021475925.1
si:ch211-132g1.3	ENSDART00000131675	j	si:ch211-132g1.3	XM_021475926.1
si:ch211-132g1.3	ENSDART00000131675	j	si:ch211-132g1.3	XM_021475930.1
si:ch211-132g1.3	ENSDART00000131675	j	si:ch211-132g1.3	XM_021475927.1
si:ch211-132g1.3	ENSDART00000131675	j	si:ch211-132g1.3	XM_021475929.1
si:ch211-132g1.3	ENSDART00000131675	j	si:ch211-132g1.3	XM_021475928.1
si:ch211-132g1.3	ENSDART00000131675	=	si:ch211-132g1.3	XM_021475931.1
si:ch211-132g1.3	ENSDART00000143790	j	LOC103911757	XM_009305481.2
si:ch211-132g1.6	ENSDART00000152442	k	si:ch211-132g1.6	XM_009305490.2
si:ch211-132g1.4	ENSDART00000142874	j	si:ch211-132g1.4	XM_009305496.2
si:ch211-132g1.4	ENSDART00000142874	=	si:ch211-132g1.4	XM_005168310.4
si:ch211-132g1.1	ENSDART00000131463	k	si:ch211-132g1.1	XM_005168309.3
PTGFRN	ENSDART00000110331	=	si:ch211-132g1.7	XM_005168313.4
slc5a3a	ENSDART00000008332	=	slc5a3a	NM_001159837.1
oxgr1a.1	ENSDART00000041936	=	oxgr1a.1	NM_001040383.1
oxgr1a.3	ENSDART00000058878	=	oxgr1a.3	NM_001145628.1
oxgr1a.2	ENSDART00000109983	=	oxgr1a.2	NM_001145625.1
mbnl2	ENSDART00000122626	j	mbnl2	XM_009305354.3
mbnl2	ENSDART00000122626	j	mbnl2	XM_021475189.1
mbnl2	ENSDART00000122626	j	mbnl2	XM_009305352.3
mbnl2	ENSDART00000122626	j	mbnl2	XM_005168297.4
mbnl2	ENSDART00000122626	j	mbnl2	XM_021475191.1
mbnl2	ENSDART00000122626	=	mbnl2	XM_009305355.3
mbnl2	ENSDART00000122626	j	mbnl2	XM_009305356.3
mbnl2	ENSDART00000164488	=	mbnl2	XM_021475196.1
mbnl2	ENSDART00000122626	j	mbnl2	XM_009305373.3
mbnl2	ENSDART00000122626	j	mbnl2	XM_009305365.3
mbnl2	ENSDART00000122626	j	mbnl2	XM_021475193.1
mbnl2	ENSDART00000122626	j	mbnl2	NM_001161669.1
mbnl2	ENSDART00000122626	j	mbnl2	NM_001099998.2
mbnl2	ENSDART00000122626	j	mbnl2	NM_001161671.1
mbnl2	ENSDART00000122626	j	mbnl2	NM_001161670.1
mbnl2	ENSDART00000122626	j	mbnl2	XM_005168298.4
mbnl2	ENSDART00000122626	j	mbnl2	XM_005168296.4
rap2ab	ENSDART00000058877	=	rap2ab	NM_001145705.1
kpnb3	ENSDART00000058876	j	kpnb3	NM_001145604.1
kpnb3	ENSDART00000058876	=	kpnb3	XM_009305394.2
farp1	ENSDART00000142944	j	farp1	XM_017355952.2
si:ch211-235f1.3	ENSDART00000144500	m	si:ch211-235f1.3	XM_017355954.2
si:ch211-235f1.3	ENSDART00000144500	m	si:ch211-235f1.3	XR_002458712.1
si:ch211-235f1.3	ENSDART00000144500	m	si:ch211-235f1.3	XM_021475933.1
si:ch211-235f1.3	ENSDART00000144500	m	si:ch211-235f1.3	XM_021475932.1
si:ch211-235f1.3	ENSDART00000144500	m	si:ch211-235f1.3	XM_017355955.2
farp1	ENSDART00000108919	i	si:ch211-235f1.3	XM_021475934.1
ggact.3	ENSDART00000103785	=	ggact.3	NM_001089560.1
ggact.3	ENSDART00000103785	=	ggact.3	XM_005168295.2
ggact.2	ENSDART00000055779	=	ggact.2	NM_001004544.1
ggact.1	ENSDART00000103795	=	ggact.1	NM_001077717.1
gpc6a	ENSDART00000126093	j	gpc6a	XM_021475731.1
gpc6a	ENSDART00000126093	=	gpc6a	NM_001109719.1
gpc6a	ENSDART00000126093	i	LOC110439758	XR_002458713.1
gpc5a	ENSDART00000157572	=	gpc5a	NM_001302236.1
dre-mir-92a-1	ENSDART00000165341	=	mir92a-1	NR_030045.1
dre-mir-19b	ENSDART00000160452	=	mir19b	NR_030016.1
dre-mir-20a	ENSDART00000168824	=	mir20a	NR_030019.1
dre-mir-19a	ENSDART00000164057	=	mir19a	NR_030015.1
dre-mir-18a	ENSDART00000162113	=	mir18a	NR_030012.1
dre-mir-17a-1	ENSDART00000165512	=	mir17a-1	NR_030009.1
-	-	u	LOC103910100	XR_660192.3
slitrk6	ENSDART00000163793	=	slitrk6	NM_001305553.1
slitrk6	ENSDART00000163793	i	LOC101887188	XR_002458715.1
slitrk6	ENSDART00000163793	i	LOC101887188	XR_002458721.1
slitrk6	ENSDART00000163793	i	LOC101887188	XR_002458720.1
slitrk6	ENSDART00000163793	i	LOC101887188	XR_002458718.1
slitrk6	ENSDART00000163793	i	LOC101887188	XR_002458714.1
slitrk6	ENSDART00000163793	i	LOC101887188	XR_002458719.1
slitrk6	ENSDART00000163793	i	LOC101887188	XR_002458716.1
slitrk6	ENSDART00000163793	i	LOC101887188	XR_002458717.1
-	-	u	slitrk1	XM_005174629.4
-	-	u	LOC101882161	XR_660194.3
-	-	u	LOC101882161	XR_660197.3
-	-	u	LOC101882161	XR_660196.3
-	-	u	LOC101882161	XR_660199.3
-	-	u	LOC101882161	XR_660195.3
-	-	u	LOC103911774	XR_662823.3
spry2	ENSDART00000052423	=	spry2	XM_005160285.4
spry2	ENSDART00000189676	=	spry2	NM_001003842.2
ndfip2	ENSDART00000103724	j	ndfip2	NM_213347.1
tuba8l2	ENSDART00000040204	=	tuba8l2	NM_200691.1
stk16	ENSDART00000055047	=	stk16	NM_001017630.1
mnx2b	ENSDART00000114035	=	mnx2b	NM_001328358.1
mnx2b	ENSDART00000040368	=	mnx2b	NM_001009887.2
atic	ENSDART00000022307	=	atic	NM_001082796.2
fn1b	ENSDART00000103755	=	fn1b	XM_009305554.3
fn1b	ENSDART00000103755	j	fn1b	XM_005160284.3
fn1b	ENSDART00000103755	j	fn1b	NM_001013261.1
cpo	ENSDART00000109756	=	cpo	NM_001145629.1
nrp2a	ENSDART00000150863	=	nrp2a	NM_212965.1
nrp2a	ENSDART00000150863	j	nrp2a	XM_021469092.1
si:ch1073-345a8.1	ENSDART00000168117	j	pard3ba	XM_017355806.2
si:ch1073-345a8.1	ENSDART00000168117	j	pard3ba	XM_017355767.2
si:ch1073-345a8.1	ENSDART00000168117	j	pard3ba	XM_017355769.2
si:ch1073-345a8.1	ENSDART00000168117	=	pard3ba	NM_001328558.1
si:ch1073-345a8.1	ENSDART00000168117	j	pard3ba	XM_021475864.1
abcb6a	ENSDART00000092324	=	abcb6a	XM_005160290.4
abcb6a	ENSDART00000179970	=	abcb6a	NM_001145693.1
cnppd1	ENSDART00000037036	=	cnppd1	NM_199928.1
prkag3a	ENSDART00000024358	j	prkag3a	XM_687502.9
prkag3a	ENSDART00000024358	j	prkag3a	XM_005160292.4
prkag3a	ENSDART00000024358	j	prkag3a	XM_005160293.4
retreg2	ENSDART00000092277	j	retreg2	XM_005160291.3
retreg2	ENSDART00000092277	=	retreg2	NM_001080014.1
mdh1b	ENSDART00000141653	n	mdh1b	XM_009305648.3
mdh1b	ENSDART00000141653	m	mdh1b	XM_009305644.3
mdh1b	ENSDART00000141653	n	mdh1b	XM_021475844.1
mdh1b	ENSDART00000141653	=	mdh1b	NM_001076761.1
fastkd2	ENSDART00000108816	j	fastkd2	XM_021475935.1
fastkd2	ENSDART00000108816	j	fastkd2	XR_002458722.1
fastkd2	ENSDART00000108816	j	fastkd2	XM_687718.9
gtf3c3	ENSDART00000127329	=	gtf3c3	NM_001256242.1
hecw2b	ENSDART00000166620	k	hecw2b	XM_003197612.5
klf7a	ENSDART00000109356	=	klf7a	NM_001020643.1
si:ch211-93g23.2	ENSDART00000147638	j	si:ch211-93g23.2	XM_021467512.1
si:ch211-93g23.2	ENSDART00000147638	=	si:ch211-93g23.2	NM_001145627.1
ube2f	ENSDART00000103701	j	ube2f	XM_009305690.3
ube2f	ENSDART00000144641	=	ube2f	XM_005160296.4
ube2f	ENSDART00000103701	=	ube2f	NM_213314.1
erbb4a	ENSDART00000092118	=	erbb4a	NM_001143751.1
CU928069.1	ENSDART00000133377	x	LOC108184914	XM_021475898.1
ERBB4 (1 of many)	ENSDART00000092114	=	si:ch73-383l1.1	XM_021475936.1
lancl1	ENSDART00000016139	=	lancl1	NM_001009891.1
mylz3	ENSDART00000015732	=	mylz3	NM_131619.2
pcnp	ENSDART00000146682	j	pcnp	XM_021473273.1
pcnp	ENSDART00000101586	=	pcnp	NM_001326718.1
pcnp	ENSDART00000140189	=	pcnp	NM_001326719.1
pcnp	ENSDART00000146682	=	pcnp	NM_001326716.1
pcnp	ENSDART00000054925	=	pcnp	NM_001006035.2
pcnp	ENSDART00000184465	=	pcnp	NM_001326717.1
mxa	ENSDART00000103588	=	mxa	NM_182942.4
mxb	ENSDART00000110696	=	mxb	XM_009305797.3
mxb	ENSDART00000012627	=	mxb	NM_001128672.1
efnb2b	ENSDART00000085203	=	efnb2b	NM_131808.1
arglu1b	ENSDART00000013264	=	arglu1b	NM_200162.1
en1b	ENSDART00000163488	k	en1b	XM_009305884.3
en1b	ENSDART00000190070	=	en1b	NM_001013498.2
radil	ENSDART00000167126	j	radil	XM_021475346.1
radil	ENSDART00000167126	j	radil	XM_021475352.1
radil	ENSDART00000167126	=	radil	NM_001102569.2
RF00271	ENSDART00000185682	y	wu:fc47e11	NR_120315.1
si:dkey-79f11.10	ENSDART00000146090	=	si:dkey-79f11.10	XM_001345921.8
CR855320.3	ENSDART00000177051	j	si:dkey-79f11.10	XM_021475938.1
si:dkey-79f11.9	ENSDART00000139774	j	si:dkey-79f11.9	XM_009306125.3
si:dkey-79f11.7	ENSDART00000141765	j	si:dkey-79f11.7	XM_009306111.3
si:dkey-79f11.7	ENSDART00000141765	j	si:dkey-79f11.7	XM_001345945.8
si:dkey-79f11.5	ENSDART00000133098	j	si:dkey-79f11.5	XM_005170873.4
si:dkey-79f11.5	ENSDART00000133098	=	si:dkey-79f11.5	XM_001345965.6
CR855320.3	ENSDART00000177051	=	si:dkey-79f11.10	XM_021475937.1
si:dkeyp-9d4.2	ENSDART00000143881	=	si:dkeyp-9d4.2	XM_009306148.3
si:dkeyp-9d4.3	ENSDART00000161938	j	si:dkeyp-9d4.3	XM_009306160.3
si:dkeyp-9d4.3	ENSDART00000161938	j	si:dkeyp-9d4.3	XM_009306153.3
SLC5A10	ENSDART00000112160	=	si:dkeyp-9d4.5	XM_017355957.2
SLC5A10	ENSDART00000112160	j	si:dkeyp-9d4.5	XM_021475940.1
FAM83G	ENSDART00000091508	j	LOC101882918	XM_005170874.4
FAM83G	ENSDART00000091508	=	LOC101882918	XM_009306162.3
grapb	ENSDART00000136654	=	grapb	NM_001030080.2
-	-	u	LOC103911848	XR_662937.3
cacna1hb	ENSDART00000168631	n	cacna1hb	XM_021475941.1
syngr3b	ENSDART00000121823	=	syngr3b	NM_001320491.1
myo15ab	ENSDART00000143547	j	myo15ab	XM_021475899.1
alkbh5	ENSDART00000091683	=	alkbh5	NM_001077387.1
mief2	ENSDART00000141283	=	mief2	NM_001076648.2
smcr8b	ENSDART00000021504	=	smcr8b	NM_214802.1
zgc:112980	ENSDART00000054981	j	zgc:112980	XM_021474480.1
zgc:112980	ENSDART00000054981	=	zgc:112980	NM_001013300.2
ptcd1	ENSDART00000114613	j	ptcd1	XM_021475942.1
ptcd1	ENSDART00000114613	=	ptcd1	XM_693706.8
-	-	u	LOC110439701	XR_002458698.1
AL928650.3	ENSDART00000152525	j	si:ch211-160d14.9	XR_662945.2
AL928650.3	ENSDART00000152525	c	si:ch211-160d14.9	XR_662946.3
SLC29A4 (1 of many)	ENSDART00000152367	=	si:ch211-160d14.6	XM_693747.7
-	-	u	zgc:153118	XM_021475945.1
AL928650.1	ENSDART00000192130	=	LOC101883376	XM_021475944.1
-	-	u	LOC103911895	XM_009306398.1
fbxl18	ENSDART00000103644	=	fbxl18	NM_001030245.1
actb1	ENSDART00000054987	=	actb1	NM_131031.1
fscn1b	ENSDART00000054989	=	fscn1b	XM_005170877.4
abcg2b	ENSDART00000152153	=	abcg2b	NM_001039066.1
zgc:77849	ENSDART00000025604	=	zgc:77849	NM_199602.2
grin2ab	ENSDART00000137900	=	grin2ab	XM_009306215.3
CT573178.1	ENSDART00000139699	j	si:ch73-191k20.1	XR_662952.3
CT573178.1	ENSDART00000139699	=	si:ch73-191k20.1	XR_002458723.1
socs1b	ENSDART00000136198	=	socs1b	XM_005170845.4
socs1b	ENSDART00000188035	=	socs1b	NM_001252630.1
CU467110.1	ENSDART00000133496	=	si:ch73-191k20.4	XR_224697.4
si:ch73-191k20.3	ENSDART00000148182	=	LOC103911865	XR_662955.3
tlr2	ENSDART00000122568	=	tlr2	XM_005170853.4
tlr2	ENSDART00000055006	=	tlr2	NM_212812.1
prkcba	ENSDART00000006211	j	prkcba	XM_005170844.4
prkcba	ENSDART00000006211	=	prkcba	NM_201029.1
cacng3a	ENSDART00000146303	=	cacng3a	XM_021475946.1
si:ch211-14k19.8	ENSDART00000163624	=	si:ch211-14k19.8	XM_003197620.4
ndufab1a	ENSDART00000081337	=	ndufab1a	NM_001003418.1
palb2	ENSDART00000113013	k	palb2	XM_001919731.7
-	-	u	LOC110439775	XR_002458725.1
-	-	u	LOC110439775	XR_002458724.1
-	-	u	LOC110439775	XR_002458726.1
rasd3	ENSDART00000046507	=	zgc:152698	NM_001079934.1
plk1	ENSDART00000081343	=	plk1	NM_001003890.3
ern2	ENSDART00000143587	=	ern2	XM_001919315.6
ern2	ENSDART00000143587	j	ern2	XM_009306258.2
chtf18	ENSDART00000092058	=	chtf18	NM_001110102.3
gng13a	ENSDART00000147277	=	gng13a	NM_001166125.2
gng13a	ENSDART00000135219	=	gng13a	NM_001198746.1
si:dkeyp-57d7.4	ENSDART00000166515	c	si:dkeyp-57d7.4	XM_021475900.1
zgc:136472	ENSDART00000055011	j	zgc:136472	XM_021475838.1
zgc:136472	ENSDART00000055011	=	zgc:136472	NM_001040241.1
ubn1	ENSDART00000114876	=	ubn1	NM_001105118.1
uncx4.1	ENSDART00000055009	=	uncx4.1	NM_001020780.2
-	-	u	LOC101883884	XR_224698.4
micall2b	ENSDART00000008682	=	micall2b	NR_132439.1
micall2b	ENSDART00000008682	m	micall2b	XR_001798158.2
micall2b	ENSDART00000137821	=	micall2b	NM_001312897.1
si:ch73-12o23.1	ENSDART00000110790	j	si:ch73-12o23.1	XM_009306266.3
si:ch73-12o23.1	ENSDART00000110790	j	si:ch73-12o23.1	XM_005170879.4
si:ch73-12o23.1	ENSDART00000110790	=	si:ch73-12o23.1	XM_002660364.5
si:ch73-12o23.1	ENSDART00000110790	j	si:ch73-12o23.1	XM_021475947.1
elfn1b	ENSDART00000189621	k	elfn1b	XM_021475948.1
elfn1b	ENSDART00000111131	=	elfn1b	XM_001920348.5
ugt5b5	ENSDART00000166601	=	ugt5b5	NR_033478.1
ugt5b4	ENSDART00000080323	=	ugt5b4	NM_001080692.1
ugt5b4	ENSDART00000160474	j	ugt5b3	NM_001177494.1
ugt5b2	ENSDART00000123725	=	ugt5b2	NM_001177499.2
ugt5b1	ENSDART00000123773	j	ugt5b1	XM_005170846.4
ugt5b1	ENSDART00000123773	=	ugt5b1	NM_001177493.1
mad1l1	ENSDART00000147904	=	mad1l1	NM_200912.2
pmm2	ENSDART00000054848	=	pmm2	NM_200084.1
zgc:56409	ENSDART00000054843	=	zgc:56409	XM_005170851.4
zgc:56409	ENSDART00000138630	=	zgc:56409	NM_200325.1
rgs11	ENSDART00000135702	j	rgs11	XM_009305952.2
rgs11	ENSDART00000135702	=	rgs11	NM_001347835.1
rgs11	ENSDART00000054833	=	rgs11	NR_144689.1
rgs11	ENSDART00000135702	j	rgs11	XM_021475038.1
rgs11	ENSDART00000135702	j	rgs11	XM_009305959.3
tmem8a	ENSDART00000138726	j	tmem8a	XM_005170863.4
tmem8a	ENSDART00000138726	=	tmem8a	NM_001145568.1
tmem8a	ENSDART00000138726	x	LOC110439781	XM_021475950.1
-	-	u	LOC110439781	XM_021475949.1
pdia2	ENSDART00000005895	=	pdia2	NM_001320534.1
si:dkeyp-75b4.8	ENSDART00000132607	=	si:dkeyp-75b4.8	XM_001336292.4
si:dkeyp-75b4.7	ENSDART00000142906	c	LOC101884154	XR_224700.4
si:dkeyp-75b4.7	ENSDART00000142906	j	LOC101884122	XR_224699.4
si:dkeyp-75b4.9	ENSDART00000144565	k	si:dkeyp-75b4.9	XM_021475951.1
si:dkeyp-75b4.10	ENSDART00000143719	=	si:dkeyp-75b4.10	XM_002660367.4
trim2b	ENSDART00000162675	=	trim2b	XM_009306306.3
rnf175	ENSDART00000054835	=	rnf175	NM_200308.3
rnf175	ENSDART00000125358	=	rnf175	NM_001328343.1
rnf175	ENSDART00000054835	j	rnf175	XM_021466728.1
fgb	ENSDART00000011701	=	fgb	NM_212774.1
fga	ENSDART00000148074	j	LOC100536670	XM_021475954.1
fga	ENSDART00000033118	=	fga	NM_001194989.1
si:ch73-132f6.5	ENSDART00000190194	j	lratb	XM_021475956.1
si:ch73-132f6.5	ENSDART00000190194	=	lratb	XM_009306315.3
lratb.1	ENSDART00000080576	=	lratb	XM_001921155.5
lratb.2	ENSDART00000152432	=	lratb.2	NM_001135971.1
rbm46	ENSDART00000110698	=	rbm46	NM_001080024.2
npy2rl	ENSDART00000152424	=	npy2rl	NM_001327802.1
eif3f	ENSDART00000152562	=	eif3f	NM_001200009.1
zgc:77880	ENSDART00000043881	=	zgc:77880	NM_200891.1
pip4p1b	ENSDART00000029774	=	tmem55bb	NM_001159921.1
FRMD7	ENSDART00000152565	k	LOC557811	XM_021475962.1
dachb	ENSDART00000046283	j	dachb	XM_009305776.3
dachb	ENSDART00000046283	=	dachb	NM_152956.2
dachb	ENSDART00000046283	j	dachb	XM_021477542.1
cnpy3	ENSDART00000040116	=	tnrc5	NM_001039805.2
trpc5a	ENSDART00000131294	j	trpc5a	XM_009305936.3
trpc5a	ENSDART00000179237	=	trpc5a	NM_001327747.1
trpc5a	ENSDART00000140495	=	trpc5a	NM_001044827.1
zgc:174945	ENSDART00000103550	=	zgc:174945	NM_001082892.1
si:dkey-31e10.1	ENSDART00000103548	j	si:dkey-31e10.1	XM_021475967.1
si:dkey-31e10.1	ENSDART00000103548	k	si:dkey-31e10.1	XM_021475965.1
si:dkey-31e10.1	ENSDART00000103548	j	si:dkey-31e10.1	XM_021475964.1
si:dkey-31e10.5	ENSDART00000152421	j	si:dkey-31e10.5	XM_003197623.5
CU915827.1	ENSDART00000152189	j	si:dkey-31e10.6p	XM_009306342.3
zgc:103678	ENSDART00000054879	=	zgc:103678	NM_001004662.2
atp1b1b	ENSDART00000139387	=	atp1b1b	NM_131671.1
cnga3b	ENSDART00000027050	j	LOC100334711	XM_002660377.5
si:ch73-222h13.1	ENSDART00000139749	j	si:ch73-222h13.1	XM_002660374.5
crfb15	ENSDART00000167452	j	crfb15	XM_021476362.1
crfb15	ENSDART00000167452	=	crfb15	NM_001278848.1
dmd	ENSDART00000170290	j	dmd	XM_009306076.3
dmd	ENSDART00000170290	j	dmd	XM_017355863.2
dmd	ENSDART00000170290	j	dmd	XM_021475868.1
dmd	ENSDART00000170290	j	dmd	XR_001799156.2
dmd	ENSDART00000170290	j	dmd	XM_021475867.1
dmd	ENSDART00000170290	j	dmd	XM_021475866.1
dmd	ENSDART00000170290	j	dmd	XM_021475869.1
dmd	ENSDART00000170290	j	dmd	XM_021475865.1
dmd	ENSDART00000170290	j	dmd	XM_017355864.2
dmd	ENSDART00000170290	=	dmd	NM_001326687.1
dmd	ENSDART00000009886	=	dmd	NM_131785.2
dmd	ENSDART00000170290	j	dmd	XM_021475870.1
knl1	ENSDART00000147648	k	casc5	XM_001921844.6
knl1	ENSDART00000147648	k	casc5	XM_009306360.3
knstrn	ENSDART00000109858	=	knstrn	NM_001128774.1
sdk1b	ENSDART00000141238	j	sdk1b	XM_017355965.2
sdk1b	ENSDART00000141238	j	sdk1b	XM_021475981.1
sdk1b	ENSDART00000141238	j	sdk1b	XM_017355966.2
si:dkey-26i13.7	ENSDART00000140725	=	si:dkey-26i13.7	XM_001338431.7
si:dkey-26i13.6	ENSDART00000158253	k	si:dkey-26i13.6	XM_003197630.4
si:dkey-26i13.5	ENSDART00000188891	k	si:dkey-26i13.5	XM_001338142.5
si:dkey-26i13.3	ENSDART00000163312	k	si:dkey-26i13.3	XM_017356922.2
chst12b	ENSDART00000115316	k	si:dkey-26i13.4	XM_001338014.4
BX569798.1	ENSDART00000054787	=	LOC797518	XM_021475901.1
brat1	ENSDART00000090689	=	brat1	NM_001040305.1
brat1	ENSDART00000090689	j	brat1	XM_021475839.1
si:dkey-26i13.8	ENSDART00000147623	j	si:dkey-26i13.8	XM_009306505.3
si:dkey-26i13.8	ENSDART00000147623	j	si:dkey-26i13.8	XM_001337800.6
si:dkey-26i13.8	ENSDART00000147623	j	si:dkey-26i13.8	XM_017355968.1
chst12b	ENSDART00000140329	o	chst12b	XM_009306519.3
chst12b	ENSDART00000140329	o	chst12b	XM_005159821.4
-	-	u	zmp:0000001069	XM_005159825.4
ttyh3b	ENSDART00000033361	=	ttyh3b	NM_001037387.2
ttyh3b	ENSDART00000033361	j	ttyh3b	XM_005159819.4
iqce	ENSDART00000163971	=	iqce	NM_001287204.1
iqce	ENSDART00000123431	=	iqce	XM_002660380.5
snx8b	ENSDART00000166981	j	snx8b	XM_021475993.1
snx8b	ENSDART00000166981	=	snx8b	XM_009306530.2
grk4	ENSDART00000066638	=	grk4	NM_001079986.1
grk4	ENSDART00000066638	j	grk4	XM_009306441.2
grk4	ENSDART00000159981	=	grk4	XM_009306444.2
tspan5b	ENSDART00000103399	=	tspan5b	NM_001008591.1
slc24a2	ENSDART00000080100	j	slc24a2	XM_017355745.2
slc24a2	ENSDART00000080100	=	slc24a2	NM_001328436.1
saraf	ENSDART00000137697	=	saraf	XM_005159818.4
saraf	ENSDART00000103403	=	saraf	NM_001076589.1
pla2g12a	ENSDART00000103406	=	pla2g12a	NM_001082799.1
si:dkey-58j15.10	ENSDART00000152392	=	LOC110439783	XM_021475996.1
xpa	ENSDART00000055566	j	xpa	XM_009306424.3
xpa	ENSDART00000055566	j	xpa	XM_005159814.4
xpa	ENSDART00000055566	j	xpa	XM_009306421.3
xpa	ENSDART00000055566	j	xpa	NM_200471.1
mttp	ENSDART00000015251	=	mtp	NM_212970.1
spink4	ENSDART00000126020	=	spink4	NM_001327899.1
b4galt1	ENSDART00000166429	j	b4galt1	NM_001017730.1
stra6l	ENSDART00000142081	j	stra6l	XM_005159799.4
stra6l	ENSDART00000142081	=	stra6l	NM_001089448.1
tdrd7a	ENSDART00000040307	j	tdrd7a	NM_213105.1
tdrd7a	ENSDART00000040307	=	tdrd7a	NM_001099343.1
tmod1	ENSDART00000111485	j	tmod1	XM_021475998.1
tmod1	ENSDART00000111485	k	tmod1	XM_001920567.5
tmod1	ENSDART00000111485	j	tmod1	XM_005159810.4
tmod1	ENSDART00000111485	j	tmod1	XM_021476000.1
cplx2l	ENSDART00000142122	=	cplx2l	XM_021471102.1
cplx2l	ENSDART00000003825	=	cplx2l	NM_001002459.2
gne	ENSDART00000158595	=	gne	NM_200883.1
nansa	ENSDART00000067086	=	nansa	NM_206829.1
clta	ENSDART00000144920	=	clta	XM_005159806.3
clta	ENSDART00000138759	=	clta	XM_005159805.3
clta	ENSDART00000067082	=	clta	NM_213045.1
sclt1	ENSDART00000146067	=	sclt1	XM_021476006.1
sclt1	ENSDART00000146067	j	sclt1	XM_021476004.1
zgc:77739	ENSDART00000138622	=	zgc:77739	XM_005159803.4
zgc:77739	ENSDART00000184296	k	zgc:77739	XM_005159804.4
zgc:77739	ENSDART00000008127	=	zgc:77739	NM_200896.1
CU550719.2	ENSDART00000165050	c	LOC103911926	XR_001799173.2
CU550719.2	ENSDART00000165050	j	LOC103911926	XR_002458737.1
pcdh10a	ENSDART00000165785	=	pcdh10a	XM_009306589.3
pcdh10a	ENSDART00000189465	=	pcdh10a	XM_009306587.3
pcdh10a	ENSDART00000180121	=	pcdh10a	NM_212571.1
BX323031.1	ENSDART00000162959	j	si:dkeyp-7b3.2	XR_663080.3
si:dkey-5n7.2	ENSDART00000170314	=	si:dkeyp-106c3.2	XM_005159307.3
pcdh18a	ENSDART00000127838	=	pcdh18a	XM_005159845.4
pcdh18a	ENSDART00000127838	j	pcdh18a	XM_005159846.4
pcdh18a	ENSDART00000127838	j	pcdh18a	XM_005159847.4
pcdh18a	ENSDART00000193663	=	pcdh18a	NM_001115058.1
pcdh18a	ENSDART00000127838	j	pcdh18a	XR_222598.4
pcdh18a	ENSDART00000127838	j	pcdh18a	XR_222599.4
BX004970.1	ENSDART00000194606	i	LOC101886760	XR_002458740.1
BX004970.1	ENSDART00000194606	i	LOC101886760	XR_002458739.1
BX004970.1	ENSDART00000194606	i	LOC101886760	XR_222605.4
BX004970.1	ENSDART00000194606	i	LOC101886790	XR_222606.4
FP236197.1	ENSDART00000194501	=	LOC101886839	XR_663089.3
FP236197.1	ENSDART00000194501	j	LOC101886839	XR_002458741.1
noctb	ENSDART00000111026	=	noctb	XM_021476014.1
noctb	ENSDART00000111026	j	noctb	XM_021476012.1
elf2b	ENSDART00000103383	=	elf2b	NM_199219.2
elf2b	ENSDART00000191046	j	elf2b	XM_005159830.4
elf2b	ENSDART00000191046	j	elf2b	XM_005159829.4
elf2b	ENSDART00000191046	=	elf2b	XM_005159828.2
-	-	u	mgarp	XM_003197634.5
-	-	u	mgarp	XM_005159849.4
hpf1	ENSDART00000079716	=	hpf1	NM_001005769.1
ank2a	ENSDART00000021693	j	ank2a	XM_021476018.1
ank2a	ENSDART00000021693	j	ank2a	XM_021476026.1
ank2a	ENSDART00000021693	j	ank2a	XM_021476020.1
ank2a	ENSDART00000021693	j	ank2a	XM_021476039.1
ank2a	ENSDART00000021693	j	ank2a	XM_021476025.1
ank2a	ENSDART00000021693	j	ank2a	XM_021476031.1
ank2a	ENSDART00000021693	j	ank2a	XM_021476024.1
ank2a	ENSDART00000021693	j	ank2a	XM_021476030.1
ank2a	ENSDART00000021693	j	ank2a	XM_021476028.1
ank2a	ENSDART00000021693	j	ank2a	XM_021476033.1
ank2a	ENSDART00000021693	j	ank2a	XM_021476015.1
ank2a	ENSDART00000021693	j	ank2a	XM_021476035.1
ank2a	ENSDART00000021693	j	ank2a	XM_021476037.1
ank2a	ENSDART00000021693	j	ank2a	XM_021476022.1
ank2a	ENSDART00000021693	i	LOC101887098	XR_002458743.1
ank2a	ENSDART00000021693	i	LOC101887098	XR_663095.3
ank2a	ENSDART00000021693	i	LOC101887098	XR_002458742.1
ank2a	ENSDART00000021693	i	LOC101887098	XR_222610.4
camk2d2	ENSDART00000044896	j	camk2d2	XM_017354084.2
camk2d2	ENSDART00000044896	j	camk2d2	XM_017354018.2
camk2d2	ENSDART00000044896	j	camk2d2	XM_009306667.3
camk2d2	ENSDART00000044896	j	camk2d2	XM_021471362.1
camk2d2	ENSDART00000044896	j	camk2d2	XM_021471546.1
camk2d2	ENSDART00000044896	j	camk2d2	XM_009306662.3
camk2d2	ENSDART00000044896	j	camk2d2	XM_009306669.3
camk2d2	ENSDART00000044896	j	camk2d2	XM_009306661.3
camk2d2	ENSDART00000044896	j	camk2d2	XM_009306665.3
camk2d2	ENSDART00000044896	j	camk2d2	XM_009306663.3
camk2d2	ENSDART00000044896	j	camk2d2	XM_005159836.4
camk2d2	ENSDART00000040049	=	camk2d2	NM_001002542.1
camk2d2	ENSDART00000044896	j	camk2d2	XM_021471587.1
camk2d2	ENSDART00000044896	=	camk2d2	XM_009306657.3
cxcl8a	ENSDART00000161996	j	cxcl8a	XM_009306855.3
cxcl8a	ENSDART00000161996	=	cxcl8a	XM_001342570.7
pde5aa	ENSDART00000079359	k	pde5aa	XM_021476042.1
pde5aa	ENSDART00000079359	k	pde5aa	XM_009306860.3
ppp2r2ca	ENSDART00000017679	=	ppp2r2ca	NM_001037394.1
ppp2r2ca	ENSDART00000017679	m	ppp2r2ca	XM_021478641.1
wfs1a	ENSDART00000090025	j	wfs1a	XM_690160.9
crmp1	ENSDART00000064468	j	crmp1	XM_005159843.4
crmp1	ENSDART00000064468	=	crmp1	NM_001020725.1
BX530018.1	ENSDART00000046874	k	LOC567498	XM_005159850.4
fip1l1b	ENSDART00000103346	j	fip1l1b	XM_009306697.2
fip1l1b	ENSDART00000103346	j	fip1l1b	XM_009306690.2
fip1l1b	ENSDART00000103346	=	fip1l1b	NM_001006042.1
BX530018.2	ENSDART00000184641	j	LOC553528	XM_009306884.3
chic2	ENSDART00000030083	=	chic2	NM_201120.1
BX530018.2	ENSDART00000184641	=	LOC553528	NM_001328067.1
BX530018.2	ENSDART00000184641	j	LOC553528	XM_021474860.1
BX530018.2	ENSDART00000123895	=	LOC553528	NM_001328068.1
slc34a2a	ENSDART00000024328	x	slc34a2aas	NR_002876.2
slc34a2a	ENSDART00000024328	=	slc34a2a	NM_131624.1
rbpja	ENSDART00000005067	=	rbpja	NM_198878.2
stim2a	ENSDART00000114097	=	stim2a	XM_002660408.6
-	-	u	LOC101882365	XM_021475902.1
si:dkey-194g4.1	ENSDART00000057044	j	si:dkey-194g4.1	XM_021476058.1
CR847936.7	ENSDART00000184399	x	LOC100004921	XM_021475903.1
-	-	u	LOC110439785	XR_002458761.1
CR847936.6	ENSDART00000180678	o	LOC100004978	XM_017355972.2
CR847936.6	ENSDART00000180678	o	LOC100004978	XR_002458746.1
CR847936.6	ENSDART00000180678	o	LOC100004978	XM_021476123.1
CR847936.6	ENSDART00000180678	o	LOC100004978	XM_021476125.1
CR847936.6	ENSDART00000180678	j	LOC110437782	XM_021476077.1
CR847936.6	ENSDART00000180678	j	LOC110437782	XM_021476073.1
CR847936.6	ENSDART00000180678	j	LOC110437782	XM_021476072.1
CR847936.9	ENSDART00000184256	x	LOC100329816	XM_021476090.1
CR847936.10	ENSDART00000194034	x	LOC100332745	XM_021476092.1
CR847936.10	ENSDART00000194034	x	LOC100332745	XM_021476096.1
CR847936.10	ENSDART00000194034	x	LOC100332745	XM_021476093.1
-	-	u	LOC101884963	XR_002458756.1
CR847936.10	ENSDART00000194034	i	LOC100005071	XR_002458753.1
CR847936.10	ENSDART00000194034	i	LOC100005071	XR_002458755.1
CR847936.10	ENSDART00000194034	i	LOC100005071	XR_002458754.1
CR847936.10	ENSDART00000194034	i	LOC110438559	XM_021476133.1
CR847936.10	ENSDART00000194034	i	LOC110438559	XM_021476134.1
CR847936.10	ENSDART00000194034	i	LOC108189345	XM_021476082.1
CR847936.10	ENSDART00000194034	i	LOC108189345	XM_021476085.1
CR847936.10	ENSDART00000194034	i	LOC108189345	XR_002458745.1
CR847936.10	ENSDART00000194034	i	LOC108189345	XR_002458744.1
CR847936.10	ENSDART00000194034	i	LOC108189345	XM_021476088.1
CR847936.10	ENSDART00000194957	i	LOC108189470	XR_002458759.1
CR847936.10	ENSDART00000194957	i	LOC108189376	XR_002458760.1
CR847936.10	ENSDART00000194957	j	LOC110438560	XR_002458758.1
CR847936.1	ENSDART00000192194	j	LOC100330143	XM_021476070.1
CR847936.1	ENSDART00000192194	j	LOC100330143	XM_021476061.1
CR847936.1	ENSDART00000192194	j	LOC100330143	XM_021476065.1
CR847936.1	ENSDART00000192194	j	LOC100330143	XM_021476064.1
CR847936.1	ENSDART00000192194	j	LOC100330143	XM_021476062.1
CR847936.1	ENSDART00000192194	j	LOC100330143	XM_021476060.1
-	-	u	LOC108185170	XM_021475904.1
CU138548.5	ENSDART00000193331	j	LOC100537170	XR_002458751.1
CU138548.5	ENSDART00000193331	j	LOC100537170	XR_002458752.1
CU138548.5	ENSDART00000193331	j	LOC100537170	XR_002458750.1
CU138548.5	ENSDART00000193331	j	LOC100537170	XR_002458749.1
CU138548.5	ENSDART00000193331	j	LOC100330009	XM_021475905.1
CU138548.1	ENSDART00000192733	y	LOC101886102	XM_017355987.2
CU138548.1	ENSDART00000192733	y	LOC101886102	XM_017355983.2
CU138548.1	ENSDART00000192733	y	LOC101886102	XM_017355988.2
CU138548.1	ENSDART00000192733	y	LOC101886102	XM_017355984.2
CU138548.1	ENSDART00000192733	y	LOC101886102	XM_017355982.2
-	-	u	LOC100330441	XM_021476128.1
-	-	u	LOC100330441	XM_021476131.1
-	-	u	LOC110438568	XM_021476139.1
-	-	u	LOC110438568	XM_021476137.1
-	-	u	LOC103911961	XR_002458762.1
pcdh7a	ENSDART00000111475	=	pcdh7a	XM_005159857.4
itln1	ENSDART00000121868	=	itln1	NM_001076622.2
itln1	ENSDART00000188410	j	itln1	XM_017355768.2
hgsnat	ENSDART00000109911	=	hgsnat	XM_002660409.5
hgsnat	ENSDART00000109911	j	hgsnat	XM_005159859.4
pi4k2b	ENSDART00000033018	=	pi4k2b	NM_001045485.2
dlc1	ENSDART00000109970	=	dlc1	XM_005159860.3
dlc1	ENSDART00000109970	j	dlc1	XM_017355991.2
dlc1	ENSDART00000109970	j	dlc1	XM_021476167.1
SGCZ	ENSDART00000177122	=	sgcz	XM_017355993.2
tusc3	ENSDART00000160270	=	tusc3	XM_021474885.1
tusc3	ENSDART00000160270	=	tusc3	NM_001020560.1
fgf20a	ENSDART00000013024	=	fgf20a	NM_001037103.2
micu3a	ENSDART00000113266	j	micu3a	XM_021476177.1
CT573256.1	ENSDART00000122959	=	LOC794952	XM_021476183.1
vps37a	ENSDART00000078675	=	vps37a	NM_199990.1
-	-	u	LOC110439786	XR_002458765.1
mtmr7b	ENSDART00000169081	j	mtmr7b	XM_005168352.4
mtmr7b	ENSDART00000169081	=	mtmr7b	NM_001030126.1
mtus1b	ENSDART00000048855	j	mtus1b	XM_001919934.7
mtus1b	ENSDART00000048855	j	mtus1b	XM_017355994.2
mtus1b	ENSDART00000187067	=	mtus1b	XM_005168364.4
mtus1b	ENSDART00000048855	j	mtus1b	XM_017355995.2
mtus1b	ENSDART00000162164	=	mtus1b	XM_005168365.4
pcm1	ENSDART00000164899	j	pcm1	XM_021478859.1
pcm1	ENSDART00000164899	j	pcm1	XM_021478719.1
pcm1	ENSDART00000164899	j	pcm1	XM_021478772.1
pcm1	ENSDART00000164899	j	pcm1	XM_021478756.1
pcm1	ENSDART00000164899	j	pcm1	XM_021478742.1
pcm1	ENSDART00000164899	j	pcm1	XM_009307141.2
pcm1	ENSDART00000164899	j	pcm1	XM_021478785.1
pcm1	ENSDART00000164899	j	pcm1	XM_009307146.2
pcm1	ENSDART00000164899	j	pcm1	XM_021478881.1
pcm1	ENSDART00000164899	j	pcm1	NM_001115123.1
asah1b	ENSDART00000040434	=	asah1b	NM_200577.1
-	-	u	LOC103912018	XR_663242.3
-	-	u	LOC110439707	XR_002458699.1
frg1	ENSDART00000178599	=	frg1	XM_021474756.1
frg1	ENSDART00000079001	=	frg1	NM_001017793.1
fat1a	ENSDART00000145068	j	fat1a	XM_021469232.1
fat1a	ENSDART00000145068	j	fat1a	XM_005168343.4
fat1a	ENSDART00000145068	j	fat1a	XM_005168345.4
fat1a	ENSDART00000145068	j	fat1a	XM_021469270.1
fat1a	ENSDART00000145068	j	fat1a	XR_663179.3
fat1a	ENSDART00000145068	j	fat1a	XR_002456398.1
fat1a	ENSDART00000145068	j	fat1a	XM_021469206.1
fat1a	ENSDART00000145068	j	fat1a	XR_002456399.1
fat1a	ENSDART00000145068	=	fat1a	NM_212967.2
casp3a	ENSDART00000005593	=	casp3a	NM_131877.3
acsl1a	ENSDART00000125125	=	acsl1a	XM_005168349.4
acsl1a	ENSDART00000039917	j	acsl1a	XM_005168350.4
acsl1a	ENSDART00000039917	=	acsl1a	NM_001031837.1
acsl1a	ENSDART00000039917	j	acsl1a	XR_663200.3
helt	ENSDART00000078889	=	helt	NM_207065.2
si:dkey-256e7.5	ENSDART00000043484	k	si:ch211-197n1.2	XM_692079.7
si:dkey-256e7.5	ENSDART00000043484	k	si:ch211-197n1.2	XM_005168366.4
slc25a4	ENSDART00000030665	=	slc25a4	NM_214702.1
cfap97	ENSDART00000146258	=	cfap97	XM_005168338.4
cfap97	ENSDART00000181078	=	cfap97	NM_212778.1
ankrd37	ENSDART00000103236	=	ankrd37	NM_001145614.1
ufsp2	ENSDART00000148322	j	ufsp2	NM_198810.1
ufsp2	ENSDART00000122670	=	ufsp2	XM_005168337.4
si:dkey-256e7.8	ENSDART00000133027	j	si:dkey-256e7.8	XM_017355880.2
pdlim3a	ENSDART00000018238	=	pdlim3a	NM_001024376.1
sorbs2a	ENSDART00000138475	j	sorbs2a	XM_017355996.2
sorbs2a	ENSDART00000138475	j	sorbs2a	XM_021476202.1
sorbs2a	ENSDART00000138475	j	sorbs2a	XM_021476203.1
tlr3	ENSDART00000013021	=	tlr3	NM_001013269.3
cyp4v8	ENSDART00000089480	=	cyp4v8	NM_001077602.1
-	-	u	LOC101885541	XR_002458774.1
-	-	u	LOC101885541	XR_002458771.1
-	-	u	LOC101885541	XR_002458772.1
-	-	u	LOC101885541	XR_002458770.1
-	-	u	LOC101885541	XR_002458773.1
-	-	u	LOC101885541	XR_002458775.1
-	-	u	LOC101885541	XR_002458769.1
-	-	u	LOC101885801	XR_002458700.1
-	-	u	LOC101885905	XR_002458779.1
-	-	u	LOC101885905	XR_002458777.1
-	-	u	LOC101885905	XR_002458778.1
AL929210.1	ENSDART00000143157	j	LOC101885961	XR_002458780.1
mtnr1aa	ENSDART00000054674	=	mtnr1aa	NM_131393.1
klhl5	ENSDART00000089442	j	klhl5	XM_021475203.1
klhl5	ENSDART00000089442	=	klhl5	NM_001170942.1
si:dkey-192k22.2	ENSDART00000142515	k	si:dkey-192k22.2	XM_001334757.7
fam114a1	ENSDART00000082063	j	fam114a1	XM_009307313.3
fam114a1	ENSDART00000082063	=	fam114a1	NM_001089478.1
klf3	ENSDART00000014916	j	klf3	XM_017356404.2
klf3	ENSDART00000014916	=	klf3	NM_131859.3
tbc1d1	ENSDART00000133194	k	tbc1d1	XM_021476243.1
tbc1d1	ENSDART00000133194	j	tbc1d1	XM_021476256.1
tbc1d1	ENSDART00000133194	j	tbc1d1	XM_021476251.1
tbc1d1	ENSDART00000133194	j	tbc1d1	XM_021476250.1
tbc1d1	ENSDART00000133194	j	tbc1d1	XM_021476253.1
pgm2	ENSDART00000020970	=	pgm2	NM_212886.1
tmsb5	ENSDART00000142026	=	si:dkey-167i21.2	NR_015622.1
slc25a51a	ENSDART00000078610	=	slc25a51a	NM_200755.1
-	-	u	LOC100535985	XR_224306.3
zgc:195282	ENSDART00000109294	=	zgc:195282	NM_001161335.1
zgc:195282	ENSDART00000146410	=	zgc:195282	NM_001305559.1
zgc:195282	ENSDART00000146410	j	zgc:195282	XM_005168323.4
zgc:195282	ENSDART00000146410	j	zgc:195282	XM_009307111.3
rnf38	ENSDART00000139241	=	rnf38	XM_690108.8
rnf38	ENSDART00000139241	j	rnf38	XM_021476260.1
-	-	u	LOC101886347	XR_224309.4
-	-	u	LOC101886347	XR_663290.3
limch1a	ENSDART00000132379	j	limch1a	XM_021475267.1
limch1a	ENSDART00000132379	j	limch1a	XM_021475270.1
limch1a	ENSDART00000132379	j	limch1a	XM_021475273.1
limch1a	ENSDART00000132379	j	limch1a	XM_021475278.1
limch1a	ENSDART00000132379	j	limch1a	XM_005168356.4
limch1a	ENSDART00000132379	j	limch1a	XM_021475284.1
limch1a	ENSDART00000132379	j	limch1a	XM_005168358.4
limch1a	ENSDART00000132379	=	limch1a	NM_001145577.1
phox2ba	ENSDART00000141795	=	phox2ba	NM_001145703.1
exosc9	ENSDART00000002886	=	exosc9	NM_001006077.1
ptpn9b	ENSDART00000114514	=	ptpn9b	XM_685567.9
ptprdb	ENSDART00000131579	j	ptprdb	XM_021475092.1
ptprdb	ENSDART00000131579	j	ptprdb	XM_021475134.1
ptprdb	ENSDART00000131579	j	ptprdb	XM_021475048.1
ptprdb	ENSDART00000131579	j	ptprdb	XM_021475202.1
ptprdb	ENSDART00000131579	j	ptprdb	XM_017355010.2
ptprdb	ENSDART00000131579	j	ptprdb	XM_017354914.2
ptprdb	ENSDART00000131579	j	ptprdb	XM_021475144.1
ptprdb	ENSDART00000131579	j	ptprdb	XM_017354994.2
ptprdb	ENSDART00000131579	j	ptprdb	XM_021475521.1
ptprdb	ENSDART00000131579	j	ptprdb	XM_021475423.1
ptprdb	ENSDART00000131579	j	ptprdb	XM_021475265.1
ptprdb	ENSDART00000131579	j	ptprdb	XM_009307099.3
ptprdb	ENSDART00000131579	j	ptprdb	XM_009307109.3
ptprdb	ENSDART00000131579	j	ptprdb	XM_021475177.1
ptprdb	ENSDART00000131579	j	ptprdb	XM_009307104.3
ptprdb	ENSDART00000131579	j	ptprdb	XM_021475293.1
ptprdb	ENSDART00000131579	j	ptprdb	XM_021475387.1
ptprdb	ENSDART00000131579	j	ptprdb	XM_021475348.1
ptprdb	ENSDART00000131579	j	ptprdb	XM_021475233.1
ptprdb	ENSDART00000131579	j	ptprdb	XM_005168322.4
ptprdb	ENSDART00000131579	j	ptprdb	XM_021475054.1
ptprdb	ENSDART00000162949	=	ptprdb	NM_001166048.1
ptprdb	ENSDART00000127145	=	ptprdb	NM_001098769.2
-	-	u	LOC108190005	XR_001799206.2
si:dkeyp-118a3.2	ENSDART00000129970	j	si:dkeyp-118a3.2	XM_021476276.1
si:dkeyp-118a3.2	ENSDART00000129970	=	si:dkeyp-118a3.2	XM_005168372.4
tyrp1b	ENSDART00000078594	=	tyrp1b	NM_001002749.2
rbm47	ENSDART00000135552	=	rbm47	NM_001114686.2
rbm47	ENSDART00000135552	j	rbm47	XM_009307327.3
rbm47	ENSDART00000135552	j	rbm47	XM_021475398.1
rbm47	ENSDART00000135552	j	rbm47	XM_005168361.4
rbm47	ENSDART00000135552	j	rbm47	XM_005168360.4
rbm47	ENSDART00000135552	j	rbm47	XM_005168359.4
lap3	ENSDART00000089025	=	lap3	NM_001114847.1
clockb	ENSDART00000133959	=	clockb	XM_005168339.4
clockb	ENSDART00000012552	=	clockb	NM_178295.2
kitb	ENSDART00000044030	=	kitb	NM_001143918.1
clrn2	ENSDART00000103091	=	clrn2	NM_001114690.1
si:dkey-245p14.4	ENSDART00000103089	=	si:dkey-245p14.4	NM_001114848.1
smc2	ENSDART00000109416	=	smc2	NM_199542.2
ecpas	ENSDART00000088949	j	kiaa0368	XM_009307347.3
ecpas	ENSDART00000088949	=	kiaa0368	NM_001162486.1
fbxo10	ENSDART00000111555	=	fbxo10	NM_001135257.1
polr1e	ENSDART00000054574	=	polr1e	NM_001020704.1
tmem192	ENSDART00000054575	=	tmem192	NM_001102393.1
apela	ENSDART00000148219	=	apela	NM_001297547.1
BX323590.2	ENSDART00000142561	=	LOC100536104	XR_002458783.1
BX323590.2	ENSDART00000143303	=	LOC100536104	XR_002458781.1
BX323590.2	ENSDART00000143303	j	LOC100536104	XR_002458782.1
march1	ENSDART00000054581	j	march1	XM_021476282.1
march1	ENSDART00000054581	j	march1	XM_021476281.1
march1	ENSDART00000054581	j	march1	XM_021476278.1
march1	ENSDART00000054581	k	march1	XM_021476277.1
march1	ENSDART00000054581	j	march1	XM_021476279.1
tma16	ENSDART00000005733	=	tma16	NM_001177745.1
si:ch211-42i9.8	ENSDART00000138276	j	si:ch211-42i9.8	XM_009307363.3
si:ch211-42i9.8	ENSDART00000138276	=	si:ch211-42i9.8	NM_001145618.1
si:ch211-42i9.8	ENSDART00000138276	j	si:ch211-42i9.8	XM_021475847.1
si:ch211-42i9.8	ENSDART00000138276	j	si:ch211-42i9.8	XM_009307371.3
si:ch211-42i9.8	ENSDART00000138276	j	si:ch211-42i9.8	XM_005168362.4
BX323590.1	ENSDART00000113832	=	zbtb5	XM_021476286.1
grhprb	ENSDART00000132958	=	grhprb	NM_205685.2
grhprb	ENSDART00000147502	=	grhprb	XM_005168340.4
UBA6	ENSDART00000111454	=	si:dkey-82j4.2	XM_021476288.1
apbb2b	ENSDART00000161573	n	apbb2b	XM_021476292.1
apbb2b	ENSDART00000161573	n	apbb2b	XM_688300.9
apbb2b	ENSDART00000161573	n	apbb2b	XM_017356028.2
apbb2b	ENSDART00000161573	n	apbb2b	XM_005168376.4
apbb2b	ENSDART00000161573	n	apbb2b	XM_009307588.3
apbb2b	ENSDART00000161573	n	apbb2b	XM_009307598.3
apbb2b	ENSDART00000161573	j	apbb2b	XM_005168377.4
-	-	u	LOC101882573	XM_017356034.2
mettl14	ENSDART00000102993	=	mettl14	NM_207071.1
prss12	ENSDART00000088653	j	prss12	XM_001920264.5
ndst3	ENSDART00000146084	=	ndst3	XM_009307604.3
ugt8	ENSDART00000124770	=	ugt8	NM_001044325.1
spock3	ENSDART00000148518	=	spock3	NM_001327988.1
spock3	ENSDART00000148518	j	spock3	NM_001327987.1
spock3	ENSDART00000166479	=	spock3	XM_009307619.3
spock3	ENSDART00000102969	=	spock3	XM_017355108.1
tll1	ENSDART00000054472	=	tll1	NM_131010.1
cpe	ENSDART00000078271	=	cpe	NM_214810.2
msmo1	ENSDART00000078277	=	msmo1	NM_213353.1
klhl2	ENSDART00000088545	=	klhl2	XM_021476297.1
CT583646.2	ENSDART00000136556	=	LOC101882260	XR_224314.3
si:dkey-253i9.4	ENSDART00000141077	j	si:dkey-253i9.4	XM_021476314.1
si:dkey-253i9.4	ENSDART00000141077	j	si:dkey-253i9.4	XM_021476306.1
si:dkey-253i9.4	ENSDART00000141077	j	si:dkey-253i9.4	XM_021476305.1
si:dkey-253i9.4	ENSDART00000141077	j	si:dkey-253i9.4	XM_021476313.1
si:dkey-253i9.4	ENSDART00000141077	j	si:dkey-253i9.4	XM_021476308.1
si:dkey-253i9.4	ENSDART00000141077	j	si:dkey-253i9.4	XM_021476310.1
npy1r	ENSDART00000142109	=	npy1r	XM_005170925.3
npy1r	ENSDART00000193900	=	npy1r	NM_001102391.1
med28	ENSDART00000054442	=	med28	NM_001007770.1
tmem144a	ENSDART00000054440	=	tmem144a	NM_001003999.1
gria2a	ENSDART00000102782	j	gria2a	XM_005170896.2
gria2a	ENSDART00000102782	j	gria2a	XM_005170897.3
gria2a	ENSDART00000102782	j	gria2a	XM_005170898.3
gria2a	ENSDART00000102782	=	gria2a	NM_131894.1
glrba	ENSDART00000102790	=	glrba	NM_131781.1
glrba	ENSDART00000102790	j	glrba	XM_017355860.2
glrba	ENSDART00000102790	j	glrba	XR_002458693.1
wdr19	ENSDART00000131257	=	wdr19	XM_021476315.1
ncapd3	ENSDART00000049572	=	ncapd3	NM_200330.1
primpol	ENSDART00000006147	=	primpol	NM_001037378.1
adamtsl7	ENSDART00000148327	j	adamtsl7	XM_021476316.1
zcchc7	ENSDART00000129066	=	zcchc7	NM_001301358.2
zcchc7	ENSDART00000129066	j	zcchc7	XM_009307728.3
si:ch211-134c9.2	ENSDART00000137138	=	LOC103908753	XR_658196.3
pax5	ENSDART00000132602	=	pax5	NM_131638.1
pax5	ENSDART00000132602	j	pax5	XM_005170922.4
pax5	ENSDART00000132602	j	pax5	XM_005170923.4
melk	ENSDART00000047728	=	melk	NM_206888.2
frmpd1a	ENSDART00000140553	k	frmpd1	XM_005170936.4
kdm4c	ENSDART00000087729	=	kdm4c	NM_001083851.1
dnah6	ENSDART00000054388	=	dnah6	XM_021476325.1
dnah6	ENSDART00000141317	i	LOC110439140	XR_002458786.1
dnah6	ENSDART00000141317	i	LOC103908754	XR_002458784.1
dnah6	ENSDART00000141317	i	LOC103908754	XR_002458785.1
si:ch73-380n15.2	ENSDART00000176849	j	si:ch73-380n15.2	XM_021476327.1
chrnb3a	ENSDART00000074678	=	chrnb3a	NM_201220.1
si:dkey-234d14.2	ENSDART00000147193	=	LOC108190615	XM_017356953.2
chrna6	ENSDART00000031546	=	chrna6	NM_001042684.2
chrnb2a	ENSDART00000187834	=	chrnb2a	XM_021476333.1
uchl1	ENSDART00000036797	=	uchl1	NM_201477.1
anxa5b	ENSDART00000019698	=	anxa5b	NM_181757.2
fgfbp1b	ENSDART00000128918	=	fgfbp1b	XM_021476334.1
fgfbp2b	ENSDART00000168171	=	fgfbp2b	XM_005170895.4
fgfbp2b	ENSDART00000076766	j	fgfbp2b	NM_001089526.1
zmynd10	ENSDART00000017413	=	zmynd10	NM_200397.1
prom1b	ENSDART00000134719	j	prom1b	XM_005170913.3
prom1b	ENSDART00000134719	j	prom1b	XM_021481345.1
prom1b	ENSDART00000134719	j	prom1b	XM_021481324.1
prom1b	ENSDART00000134719	j	prom1b	XM_021481233.1
prom1b	ENSDART00000134719	j	prom1b	XM_021481275.1
prom1b	ENSDART00000134719	j	prom1b	XM_021481260.1
prom1b	ENSDART00000134719	j	prom1b	XM_021481302.1
prom1b	ENSDART00000134719	j	prom1b	XM_021481317.1
prom1b	ENSDART00000134719	=	prom1b	NM_198071.1
tapt1b	ENSDART00000086867	=	tapt1b	NM_001123250.1
ldb2b	ENSDART00000043556	=	ldb2b	NM_131315.3
ldb2b	ENSDART00000043556	j	ldb2b	XM_009307716.3
ldb2b	ENSDART00000043556	j	ldb2b	XM_009307714.3
qdprb1	ENSDART00000054386	=	qdprb1	NM_001020698.1
gtf2e2	ENSDART00000016488	=	gtf2e2	NM_212731.1
SMIM18	ENSDART00000139412	=	si:dkey-92j12.6	NM_001303054.1
adgrl3.1	ENSDART00000190858	k	adgrl3.1	XM_005170940.4
adgrl3.1	ENSDART00000190858	j	adgrl3.1	XM_005170941.4
adgrl3.1	ENSDART00000190858	j	adgrl3.1	XM_684028.9
adgrl3.1	ENSDART00000190858	j	adgrl3.1	XM_021476346.1
adgrl3.1	ENSDART00000190858	j	adgrl3.1	XM_005170942.4
si:dkey-92j12.5	ENSDART00000188428	j	si:dkey-92j12.5	XM_021476357.1
si:dkey-92j12.5	ENSDART00000188428	j	si:dkey-92j12.5	XM_021476353.1
rfc1	ENSDART00000143948	=	rfc1	NM_001089491.2
rfc1	ENSDART00000181658	=	rpl9	NM_001003861.1
rpl9	ENSDART00000054340	=	rpl9	XM_005170906.4
rpl9	ENSDART00000054338	=	rpl9	XM_005170907.4
lias	ENSDART00000036448	=	lias	NM_001110401.1
ugdh	ENSDART00000013263	=	ugdh	NM_001110402.1
ugdh	ENSDART00000013263	x	LOC108190011	XR_002458801.1
smim14	ENSDART00000008201	=	smim14	NM_205602.2
ube2kb	ENSDART00000139003	=	ube2kb	NM_001008611.2
pds5a	ENSDART00000126785	=	pds5a	NM_200992.2
pds5a	ENSDART00000159138	j	pds5a	XM_005170916.4
pds5a	ENSDART00000126785	i	LOC108190012	XR_002458803.1
pds5a	ENSDART00000126785	i	LOC108190012	XR_002458802.1
pds5a	ENSDART00000126785	i	LOC108190012	XR_002458804.1
pds5a	ENSDART00000126785	i	LOC101886711	XR_002458812.1
n4bp2	ENSDART00000087658	=	n4bp2	NM_001079967.1
n4bp2	ENSDART00000087658	j	n4bp2	XM_021475000.1
rhoh	ENSDART00000102646	k	rhoh	NM_001327973.1
chrna9	ENSDART00000189921	j	chrna9	XM_021476367.1
-	-	u	LOC101886843	XR_002458824.1
-	-	u	LOC101886843	XR_002458823.1
si:dkeyp-26a9.2	ENSDART00000134576	c	LOC110439258	XR_002458825.1
si:dkeyp-26a9.2	ENSDART00000134576	j	LOC110439257	XM_021475906.1
si:dkeyp-26a9.2	ENSDART00000134576	c	si:dkeyp-26a9.2	XM_021475907.1
fam184b	ENSDART00000145942	j	fam184b	XM_005170920.4
fam184b	ENSDART00000145942	=	fam184b	NM_001201530.1
fam184b	ENSDART00000145942	j	fam184b	XM_021474985.1
ncapg	ENSDART00000133659	=	ncapg	NM_001256205.1
lcorl	ENSDART00000134860	=	lcorl	XM_021476386.1
lcorl	ENSDART00000155184	=	lcorl	XM_021476381.1
si:dkeyp-26a9.7	ENSDART00000143588	=	LOC108190619	XR_002458828.1
slit2	ENSDART00000007531	x	LOC110439261	XR_002458831.1
slit2	ENSDART00000187183	j	slit2	XM_021475863.1
slit2	ENSDART00000187183	j	slit2	XM_021475862.1
slit2	ENSDART00000187183	j	slit2	XM_021475858.1
slit2	ENSDART00000187183	j	slit2	XM_021475852.1
slit2	ENSDART00000187183	j	slit2	XM_021475849.1
slit2	ENSDART00000187183	j	slit2	XM_021475851.1
slit2	ENSDART00000187183	j	slit2	XM_021475860.1
slit2	ENSDART00000187183	j	slit2	XM_021475855.1
slit2	ENSDART00000187183	j	slit2	XM_021475859.1
slit2	ENSDART00000187183	j	slit2	XM_021475856.1
slit2	ENSDART00000187183	j	slit2	XM_021475853.1
slit2	ENSDART00000187183	j	slit2	XM_021475857.1
slit2	ENSDART00000187183	j	slit2	XM_021475854.1
slit2	ENSDART00000187183	j	slit2	XM_021475861.1
slit2	ENSDART00000187183	j	slit2	XM_021475850.1
slit2	ENSDART00000007531	=	slit2	NM_131735.1
dre-mir-218a-2	ENSDART00000118841	=	mir218a-2	NR_030122.1
lrba	ENSDART00000177989	=	im:7138144	XM_002660442.6
lrba	ENSDART00000177989	j	im:7138144	XM_021476409.1
lrba	ENSDART00000177989	j	im:7138144	XM_009291248.3
lrba	ENSDART00000177989	j	im:7138144	XM_009291242.3
lrba	ENSDART00000177989	j	im:7138144	XM_021476404.1
lrba	ENSDART00000177989	j	im:7138144	XM_017356061.2
lrba	ENSDART00000177989	j	im:7138144	XM_009291244.3
lrba	ENSDART00000177989	i	LOC108190014	XR_001799219.2
mab21l2	ENSDART00000014608	=	mab21l2	NM_152975.2
BX005068.1	ENSDART00000142281	j	LOC103908771	XR_002458852.1
BX005068.1	ENSDART00000142281	j	LOC103908771	XR_002458850.1
rps3a	ENSDART00000051763	=	rps3a	NM_200059.2
zgc:171517	ENSDART00000102542	=	zgc:171517	NM_001111173.1
qdprb2	ENSDART00000123789	=	qdprb2	XM_021476413.1
qdprb2	ENSDART00000130356	=	qdprb2	XM_021476419.1
sh3d19	ENSDART00000184421	j	sh3d19	XM_009291020.3
sh3d19	ENSDART00000126950	=	sh3d19	NM_001020773.2
sh3d19	ENSDART00000126950	x	LOC103908775	XR_002458858.1
fam160a1a	ENSDART00000176581	j	fam160a1a	XM_009291266.3
fam160a1a	ENSDART00000176581	=	fam160a1a	XM_009291274.3
gatb	ENSDART00000102522	=	gatb	NM_001013446.3
dctpp1	ENSDART00000076519	=	dctpp1	NM_200771.1
-	-	u	LOC101882397	XR_002458861.1
-	-	u	LOC101882397	XR_658256.3
-	-	u	LOC101882397	XR_224709.4
-	-	u	LOC101882397	XR_002458860.1
-	-	u	LOC101882397	XR_224706.4
-	-	u	LOC101882397	XR_658255.3
-	-	u	LOC101882397	XR_002458859.1
-	-	u	LOC101882397	XR_224707.4
fbxw7	ENSDART00000148076	=	fbxw7	XM_005170952.4
fbxw7	ENSDART00000132355	j	fbxw7	XM_005170948.4
fbxw7	ENSDART00000132355	j	fbxw7	XM_021476457.1
fbxw7	ENSDART00000132355	j	fbxw7	XM_021476455.1
fbxw7	ENSDART00000132355	j	fbxw7	XM_009291299.3
fbxw7	ENSDART00000132355	j	fbxw7	XM_005170951.4
fbxw7	ENSDART00000132355	j	fbxw7	XM_009291294.3
tmem154	ENSDART00000144711	k	tmem154	XM_005170905.3
tmem154	ENSDART00000144711	j	tmem154	XM_009307741.2
tmem154	ENSDART00000177225	=	tmem154	NM_001130587.1
mnd1	ENSDART00000141648	=	mnd1	XM_005170917.4
mnd1	ENSDART00000054265	=	mnd1	NM_001003597.2
tmem131l	ENSDART00000133208	j	tmem131l	XM_009291318.3
tmem131l	ENSDART00000133208	j	tmem131l	XM_005170953.4
tmem131l	ENSDART00000133208	=	tmem131l	XM_688724.8
trim2a	ENSDART00000050445	=	trim2a	NM_001014371.1
trim2a	ENSDART00000050445	j	trim2a	XM_005170890.4
trim2a	ENSDART00000050445	j	trim2a	XM_005170889.4
fhdc1	ENSDART00000111686	=	fhdc1	XM_001920021.5
arfip1	ENSDART00000141892	=	arfip1	XM_005170892.4
arfip1	ENSDART00000141892	j	arfip1	XM_005170893.3
arfip1	ENSDART00000141892	j	arfip1	XM_005170891.4
arfip1	ENSDART00000102501	=	arfip1	NM_213368.1
sfrp2	ENSDART00000102498	=	sfrp2	NM_001077384.2
-	-	u	LOC101882989	XR_002458889.1
-	-	u	LOC101882989	XR_224711.4
-	-	u	LOC101882989	XR_658262.3
-	-	u	LOC101882989	XR_002458888.1
-	-	u	LOC101882989	XR_002458887.1
-	-	u	LOC101882989	XR_002458882.1
-	-	u	LOC101882989	XR_002458886.1
AL935184.2	ENSDART00000139672	=	si:dkey-30k22.10	XR_224713.4
si:dkey-30k22.7	ENSDART00000135763	j	dchs2	XM_021476495.1
si:dkey-30k22.7	ENSDART00000135763	j	dchs2	XM_021476496.1
plrg1	ENSDART00000054235	=	plrg1	NM_213440.1
fgg	ENSDART00000054230	=	fgg	NM_213054.1
lrata	ENSDART00000054228	=	lrata	NM_001204131.2
-	-	u	LOC101883163	XM_005170955.4
AL935184.1	ENSDART00000134609	o	LOC110439814	XR_002458896.1
-	-	u	LOC100537259	XM_021476507.1
-	-	u	LOC100537259	XM_021476514.1
si:dkey-30k22.5	ENSDART00000141020	=	si:dkey-30k22.5	NM_001201411.1
npy2r	ENSDART00000140172	k	npy2r	XM_021475887.1
map9	ENSDART00000133937	j	map9	XM_009291048.2
map9	ENSDART00000133937	=	map9	NM_001278845.1
map9	ENSDART00000133937	j	map9	XM_021475530.1
gucy1a1	ENSDART00000102455	=	gucy1a3	NM_001309529.1
gucy1b1	ENSDART00000129471	=	gucy1b3	NM_001251945.2
fabp2	ENSDART00000027973	m	fabp2	XM_005170903.3
fabp2	ENSDART00000027973	=	fabp2	NM_131431.1
CU929073.1	ENSDART00000166974	k	usp53b	XM_009291397.3
usp53b	ENSDART00000145012	k	usp53b	XM_005170957.4
usp53b	ENSDART00000145012	j	usp53b	XM_021476531.1
myoz2b	ENSDART00000136321	=	myoz2b	NM_200854.2
myoz2b	ENSDART00000146488	=	myoz2b	XM_005170915.4
synpo2b	ENSDART00000137869	=	synpo2b	XM_017356099.2
si:ch211-145b13.5	ENSDART00000054202	=	si:ch211-145b13.5	XM_003197657.5
si:ch211-145b13.6	ENSDART00000170878	=	si:ch211-145b13.6	XM_002660467.5
si:ch211-145b13.6	ENSDART00000171292	j	si:ch211-145b13.6	XM_009291602.3
gpank1	ENSDART00000172737	=	gpank1	NM_001327761.1
gpank1	ENSDART00000193593	=	gpank1	NM_001327760.1
gpank1	ENSDART00000076120	=	gpank1	NM_001105703.2
pdcd4a	ENSDART00000168640	=	pdcd4a	XM_005159885.4
pdcd4a	ENSDART00000185348	=	pdcd4a	NM_212988.1
mxd4	ENSDART00000059264	j	mxd4	XM_021476569.1
mxd4	ENSDART00000059264	=	mxd4	XM_682878.9
ndufb6	ENSDART00000054205	=	ndufb6	NM_200808.1
toporsa	ENSDART00000127154	=	toporsa	XM_021479283.1
toporsa	ENSDART00000102379	=	toporsa	NM_001305555.1
toporsa	ENSDART00000102379	j	toporsa	XM_021479343.1
toporsa	ENSDART00000102379	j	toporsa	XM_017357742.2
mtap	ENSDART00000054208	=	mtap	NM_200554.1
cdkn2a/b	ENSDART00000054209	=	cdkn2a/b	XM_002660468.5
CT573245.1	ENSDART00000169362	=	LOC108190622	XR_001799830.2
cxxc4	ENSDART00000168594	=	cxxc4	XM_001345382.5
tet2	ENSDART00000113020	=	tet2	XM_005159903.4
ppa2	ENSDART00000160183	j	ppa2	XM_021468451.1
ppa2	ENSDART00000160183	=	ppa2	XM_005159884.3
ppa2	ENSDART00000023904	=	ppa2	NM_205662.1
arhgef38	ENSDART00000112263	=	arhgef38	XM_009291612.3
arhgef38	ENSDART00000112263	j	arhgef38	XM_009291618.3
ints12	ENSDART00000125690	=	ints12	NM_001002161.3
g3bp2	ENSDART00000046376	j	g3bp2	XM_021474934.1
g3bp2	ENSDART00000046376	=	g3bp2	NM_001080563.1
uso1	ENSDART00000011809	=	uso1	XM_009291480.3
uso1	ENSDART00000193833	=	uso1	XM_009291483.3
uso1	ENSDART00000112329	j	uso1	XM_009291485.3
uso1	ENSDART00000112329	=	uso1	NM_200155.1
si:ch211-202n12.2	ENSDART00000152117	j	LOC108185367	XM_021475888.1
-	-	u	LOC110439708	XR_002458701.1
coro2a	ENSDART00000011645	=	coro2a	XM_005159876.4
coro2a	ENSDART00000182040	=	coro2a	XM_005159877.4
coro2a	ENSDART00000158193	=	coro2a	NM_199643.2
anp32b	ENSDART00000102500	=	anp32b	NM_212603.2
anp32b	ENSDART00000102500	j	anp32b	XM_005159865.4
hemgn	ENSDART00000152803	=	si:dkey-25o16.2	XM_005159909.4
hemgn	ENSDART00000152144	=	si:dkey-25o16.2	XM_700557.7
trmo	ENSDART00000054184	=	trmo	NM_001037692.2
trmo	ENSDART00000152492	=	trmo	NM_001327757.1
si:dkey-25o16.4	ENSDART00000152299	=	si:dkey-25o16.4	XM_690920.7
foxe1	ENSDART00000152389	k	foxe1	XM_005159910.4
sh3gl2a	ENSDART00000090611	=	sh3gl2a	NM_201116.1
cntln	ENSDART00000147414	=	cntln	XM_001922094.6
bnc2	ENSDART00000102322	=	bnc2	XM_017354977.2
bnc2	ENSDART00000189093	=	bnc2	NM_001327751.1
bnc2	ENSDART00000161169	=	bnc2	NM_001327750.1
bnc2	ENSDART00000189093	i	LOC101882912	XR_002458934.1
bnc2	ENSDART00000189093	i	LOC101882912	XR_002458932.1
bnc2	ENSDART00000128671	=	bnc2	NM_001327752.1
si:ch211-127n13.2	ENSDART00000135759	y	LOC110439825	XM_021476620.1
si:ch211-127n13.2	ENSDART00000135759	=	si:ch211-76m11.7	XM_021476622.1
si:dkey-29d5.2	ENSDART00000165515	m	LOC108190634	XR_002458944.1
-	-	u	LOC101883046	XM_021476627.1
pspc1	ENSDART00000102335	=	pspc1	NM_001045258.1
dnajb14	ENSDART00000102337	=	dnajb14	NM_001077787.1
-	-	u	LOC110439743	XM_021475909.1
sugt1	ENSDART00000166819	j	sgut1	XM_021473696.1
sugt1	ENSDART00000166819	=	sgut1	NM_001007361.1
chst10	ENSDART00000187922	j	chst10	XM_005159889.4
chst10	ENSDART00000149785	=	chst10	XM_005159888.4
chst10	ENSDART00000187922	j	chst10	XM_005159892.4
chst10	ENSDART00000187922	j	chst10	XM_005159891.4
chst10	ENSDART00000187922	=	chst10	XM_005159890.4
chst10	ENSDART00000047211	=	chst10	NM_001003779.1
snapc3	ENSDART00000167875	j	snapc3	XM_017351814.2
snapc3	ENSDART00000167875	=	snapc3	NM_201115.2
psip1a	ENSDART00000166989	j	psip1a	XM_005159894.2
psip1a	ENSDART00000166989	=	psip1a	NM_001020726.1
psip1a	ENSDART00000166989	j	psip1a	XM_005159893.2
psip1a	ENSDART00000166989	j	psip1a	XM_009291548.3
BX571828.1	ENSDART00000149632	i	LOC110439709	XM_021475889.1
si:ch1073-440b2.1	ENSDART00000148175	=	si:ch1073-440b2.1	XM_021476636.1
-	-	u	LOC108182421	XR_001797799.2
-	-	u	LOC110439834	XR_002458963.1
-	-	u	LOC103908832	XR_658339.3
-	-	u	LOC103908832	XR_658338.2
-	-	u	LOC108190024	XR_001799233.2
FO907124.1	ENSDART00000191210	j	LOC108185504	XM_017355884.2
ednrba	ENSDART00000121758	=	ednrba	NM_131197.1
-	-	u	LOC108190026	XR_001799235.2
GK3P	ENSDART00000148536	j	zgc:172295	XM_005159941.4
GK3P	ENSDART00000148536	j	zgc:172295	XM_005159940.4
GK3P	ENSDART00000148536	j	zgc:172295	XM_017355442.2
GK3P	ENSDART00000148536	j	zgc:172295	XM_009291680.3
GK3P	ENSDART00000148536	j	zgc:172295	XM_009291698.3
GK3P	ENSDART00000148536	j	zgc:172295	XM_005159939.4
GK3P	ENSDART00000148536	j	zgc:172295	XM_009291686.3
GK3P	ENSDART00000148536	=	zgc:172295	NM_001114584.1
GK3P	ENSDART00000148536	i	LOC103908837	XR_658343.3
timmdc1	ENSDART00000075502	=	timmdc1	NM_001017828.1
poglut1	ENSDART00000075500	j	poglut1	XM_021475837.1
poglut1	ENSDART00000075500	j	poglut1	XM_021475836.1
poglut1	ENSDART00000075500	=	poglut1	NM_001037434.1
pwp2h	ENSDART00000110270	=	pwp2h	NM_213047.1
gpm6ba	ENSDART00000019770	=	gpm6ba	NM_203427.2
gemin8	ENSDART00000142350	=	gemin8	XM_005168381.4
gemin8	ENSDART00000053933	=	gemin8	NM_001007317.1
cbsa	ENSDART00000053932	=	cbsa	NM_001111232.1
cryaa	ENSDART00000075539	=	cryaa	NM_152950.2
hsf2bp	ENSDART00000075546	=	hsf2bp	XM_021475910.1
ankrd10a	ENSDART00000053926	j	ankrd10a	XM_017351630.2
ankrd10a	ENSDART00000053926	=	ankrd10a	NM_200980.1
si:ch211-198k9.6	ENSDART00000114536	=	zgc:173948	NM_001109872.2
cars2	ENSDART00000113735	=	cars2	XM_677640.9
irs2a	ENSDART00000053924	j	irs2a	XM_021466764.1
irs2a	ENSDART00000053924	j	irs2a	XR_002455723.1
irs2a	ENSDART00000053924	=	irs2a	NM_200315.1
lig4	ENSDART00000085648	=	lig4	NM_001103123.1
lig4	ENSDART00000085648	j	lig4	XM_005159958.4
fam155a	ENSDART00000112106	=	fam155a	XM_001921192.5
fam155a	ENSDART00000112106	j	fam155a	XM_009291932.3
si:dkey-1h24.2	ENSDART00000109224	=	si:dkey-1h24.2	NM_001114714.2
si:dkey-1h24.6	ENSDART00000132063	=	si:dkey-1h24.6	XM_001923447.6
raph1b	ENSDART00000088290	j	raph1b	XM_005159955.4
raph1b	ENSDART00000088290	j	raph1b	XM_009291873.3
raph1b	ENSDART00000088290	j	raph1b	XM_009291866.3
raph1b	ENSDART00000088290	j	raph1b	XM_005159954.4
raph1b	ENSDART00000088290	j	raph1b	NM_001128244.1
raph1b	ENSDART00000088290	=	raph1b	XM_005159956.4
raph1b	ENSDART00000088290	j	raph1b	XM_005159957.4
spp2	ENSDART00000189670	=	spp2	NM_001327983.1
alg11	ENSDART00000049514	=	alg11	NM_001161351.1
alg11	ENSDART00000183571	=	alg11	NM_001281826.1
cpb2	ENSDART00000054059	=	cpb2	NM_001020703.2
zc3h13	ENSDART00000054064	=	zc3h13	NM_200522.2
tm9sf2	ENSDART00000019743	=	tm9sf2	NM_212728.1
zic2b	ENSDART00000054066	=	zic2b	NM_001001820.1
pcca	ENSDART00000133905	=	pcca	NM_001002746.2
MARCH4 (1 of many)	ENSDART00000086935	=	zgc:153256	NM_001045411.1
-	-	u	im:7148405	NR_134974.1
vps8	ENSDART00000143639	j	vps8	XM_009291904.2
vps8	ENSDART00000143639	=	vps8	NM_001080616.2
dre-mir-740	ENSDART00000118020	=	mir740	NR_030522.1
si:dkey-22o12.2	ENSDART00000125759	j	si:dkey-22o12.2	XM_021467168.1
si:dkey-22o12.2	ENSDART00000125759	j	si:dkey-22o12.2	XM_021480583.1
si:dkey-22o12.2	ENSDART00000125759	=	si:dkey-22o12.2	NM_001126467.1
tmem41ab	ENSDART00000033024	=	tmem41ab	NM_213083.1
tmem41ab	ENSDART00000033024	j	tmem41ab	XM_021469451.1
igf2bp2b	ENSDART00000168189	j	igf2bp2b	XM_021474969.1
igf2bp2b	ENSDART00000185318	=	igf2bp2b	NM_001089374.1
igf2bp2b	ENSDART00000164202	=	igf2bp2b	XM_005159948.4
igf2bp2b	ENSDART00000168189	j	igf2bp2b	XM_017354915.2
igf2bp2b	ENSDART00000174868	=	igf2bp2b	XM_005159949.4
ubac2	ENSDART00000164204	j	ubac2	NM_001080561.1
gpr183b	ENSDART00000112778	=	gpr183b	NM_001130812.1
dachc	ENSDART00000018827	=	dachc	NM_001045236.1
MZT1	ENSDART00000152175	=	si:dkey-15d12.2	NM_001302806.1
bora	ENSDART00000062628	j	bora	XM_005159946.4
bora	ENSDART00000062628	=	bora	XM_005159947.2
bora	ENSDART00000127670	=	bora	NM_001007450.1
dis3	ENSDART00000085454	=	dis3	XM_001336814.8
metap1d	ENSDART00000022841	=	metap1d	NM_001024392.1
dlx2b	ENSDART00000008469	=	dlx2b	NM_131297.2
itga6b	ENSDART00000102210	j	itga6b	XM_009291986.3
itga6b	ENSDART00000102210	=	itga6b	NM_001013448.1
ppp1r9alb	ENSDART00000132466	j	si:ch211-269i23.2	XM_021476686.1
ppp1r9alb	ENSDART00000132466	j	si:ch211-269i23.2	XM_021476688.1
ppp1r9alb	ENSDART00000132466	j	si:ch211-269i23.2	XM_009292002.3
eef1a1b	ENSDART00000075340	=	eef1a1b	NM_001017795.2
kcnq5b	ENSDART00000085370	=	kcnq5b	XM_691989.9
-	-	u	LOC103908890	XM_021476708.1
rims1b	ENSDART00000087115	n	LOC568486	XM_021476714.1
cenpk	ENSDART00000146567	=	cenpk	NM_001256665.1
-	-	u	LOC110439710	XR_002458702.1
lbx1b	ENSDART00000007770	=	lbx1b	NM_001163312.1
slc2a15b	ENSDART00000075286	=	slc2a15b	NM_001020494.1
fgf8b	ENSDART00000057885	=	fgf8b	NM_182856.1
dpcd	ENSDART00000085309	j	dpcd	XM_017355734.1
dpcd	ENSDART00000085309	=	dpcd	NM_001045377.1
poll	ENSDART00000057880	=	poll	NM_213243.1
wbp1lb	ENSDART00000044214	j	wbp1lb	XM_005168390.4
wbp1lb	ENSDART00000044214	=	wbp1lb	NM_001020631.1
wbp1lb	ENSDART00000044214	j	wbp1lb	XM_021474893.1
as3mt	ENSDART00000057879	=	as3mt	NM_001039839.1
cnnm2b	ENSDART00000112333	j	cnnm2b	XM_009292266.3
cnnm2b	ENSDART00000112333	=	cnnm2b	XM_001922770.7
nt5c2b	ENSDART00000065125	j	nt5c2b	XM_021474993.1
nt5c2b	ENSDART00000152232	=	nt5c2b	XM_005168392.4
nt5c2b	ENSDART00000065125	j	nt5c2b	XM_021474992.1
nt5c2b	ENSDART00000065125	=	nt5c2b	NM_001079966.2
inab	ENSDART00000075260	=	inab	NM_131032.2
anos1a	ENSDART00000007522	=	anos1a	NM_131358.1
BX901898.2	ENSDART00000168045	o	LOC101885607	XM_009292384.2
sts	ENSDART00000146602	j	sts	XR_002458985.1
sts	ENSDART00000146602	=	sts	XM_005168397.4
pnpla4	ENSDART00000101958	=	pnpla4	NM_001089482.1
CR925879.1	ENSDART00000152552	c	LOC101885560	XR_002458703.1
pudp	ENSDART00000137156	=	pudp	NM_001020615.1
nlgn4xa	ENSDART00000152580	=	nlgn4a	XM_009292174.3
nlgn4xa	ENSDART00000113818	=	nlgn4a	XM_021475240.1
nlgn4xa	ENSDART00000152580	c	nlgn4a	NM_001166331.1
zgc:174320	ENSDART00000109369	k	LOC562564	XM_009292283.3
-	-	u	LOC110439944	XM_021477953.1
prkx	ENSDART00000136761	=	prkx	XM_685338.6
mxra5a	ENSDART00000113486	k	mxra5a	XM_001919109.7
mxra5a	ENSDART00000113486	=	mxra5a	XM_005159928.4
gyg2	ENSDART00000041191	=	gyg2	NM_001145576.1
cd99	ENSDART00000141347	=	cd99	XM_005159924.4
cd99	ENSDART00000136383	j	cd99	XM_009292151.3
cd99	ENSDART00000136383	=	cd99	NM_001079980.1
cd99	ENSDART00000136097	=	cd99	XM_005159925.4
cd99	ENSDART00000146648	=	cd99	XM_005159923.4
dhrsx	ENSDART00000187194	=	dhrsx	XM_021475978.1
dhrsx	ENSDART00000187194	j	dhrsx	XM_009292051.2
dhrsx	ENSDART00000110026	=	dhrsx	NM_001256719.1
creb1a	ENSDART00000075632	=	creb1a	NM_200909.1
chmp2bb	ENSDART00000018472	=	chmp2bb	NM_212904.2
htr1fb	ENSDART00000075626	k	htr1fb	XM_005159929.4
cldng	ENSDART00000015547	=	cldng	NM_180965.4
znf654	ENSDART00000114384	=	znf654	XM_003197672.5
arl13b	ENSDART00000102184	=	arl13b	NM_173272.1
nsun3	ENSDART00000131664	j	nsun3	XM_005159919.4
nsun3	ENSDART00000131664	=	nsun3	NM_001025302.1
nsun3	ENSDART00000131664	i	LOC110439842	XR_002458987.1
nsun3	ENSDART00000131664	i	LOC110439842	XR_002458986.1
-	-	u	LOC101886777	XM_005159934.1
epha6	ENSDART00000042984	=	epha6	XM_001344524.7
epha6	ENSDART00000146530	=	epha6	XM_005159930.3
dre-mir-734	ENSDART00000117082	=	mir734	NR_030517.1
arl6	ENSDART00000191432	=	arl6	XM_021474253.1
arl6	ENSDART00000046094	=	arl6	NM_001008733.1
slc5a7a	ENSDART00000147201	j	slc5a7a	XM_021476736.1
kctd12.2	ENSDART00000075584	=	kctd12.2	NM_001034019.2
lmo7b	ENSDART00000140515	=	lmo7b	NM_001045444.2
klf12a	ENSDART00000012873	j	klf12a	XM_021475848.1
klf12a	ENSDART00000012873	=	klf12a	NM_207062.1
pibf1	ENSDART00000004361	=	klf5a	XM_001344880.8
pibf1	ENSDART00000008277	j	pibf1	XM_021472211.1
pibf1	ENSDART00000008277	=	pibf1	NM_001003575.1
gpalpp1	ENSDART00000166007	=	gpalpp1	XM_005159916.4
gpalpp1	ENSDART00000037986	j	gpalpp1	XM_009292085.3
gpalpp1	ENSDART00000037986	=	gpalpp1	NM_001003473.1
gtf2f2a	ENSDART00000077744	=	gtf2f2a	NM_001103133.2
gtf2f2a	ENSDART00000102118	=	gtf2f2a	NM_001002127.2
tpt1	ENSDART00000102111	=	tpt1	NM_198140.1
-	-	u	LOC110439843	XR_002458988.1
zgc:172122	ENSDART00000113808	j	zgc:172122	XM_005159927.4
zgc:172122	ENSDART00000113808	=	zgc:172122	NM_001111204.1
BX897691.1	ENSDART00000192811	i	LOC101886453	XM_005168225.1
BX897691.1	ENSDART00000167461	j	LOC103910066	XM_009298647.2
BX897691.1	ENSDART00000167461	=	LOC103910066	XM_017357007.2
-	-	u	LOC108190059	XM_021476740.1
-	-	u	LOC108190061	XR_001799292.2
-	-	u	LOC110439844	XM_021476744.1
-	-	u	LOC101886362	XR_224255.4
-	-	u	LOC101886362	XR_002458989.1
sc:d189	ENSDART00000165389	j	sc:d189	XM_005157078.4
sc:d189	ENSDART00000165389	=	sc:d189	NM_001098260.1
CR786582.2	ENSDART00000165950	j	LOC101883801	XM_005157080.4
-	-	u	LOC101886741	XM_009292536.2
usp38	ENSDART00000109678	=	usp38	XM_003197674.5
gab1	ENSDART00000140724	j	gab1	XR_002456601.1
gab1	ENSDART00000140724	j	gab1	XR_002456597.1
gab1	ENSDART00000140724	j	gab1	XM_021469911.1
gab1	ENSDART00000140724	j	gab1	XM_021469872.1
gab1	ENSDART00000140724	j	gab1	XM_017353106.2
gab1	ENSDART00000140724	j	gab1	XM_017353102.2
gab1	ENSDART00000140724	j	gab1	XM_009292494.3
gab1	ENSDART00000140724	=	gab1	NM_001326713.1
gab1	ENSDART00000140724	j	gab1	XM_021469944.1
gab1	ENSDART00000140724	j	gab1	XM_021470020.1
gab1	ENSDART00000140724	j	gab1	XM_021469996.1
gab1	ENSDART00000140724	j	gab1	XM_021469965.1
frem3	ENSDART00000142154	=	frem3	NM_001137659.1
si:dkey-27h10.2	ENSDART00000176451	j	si:dkey-27h10.2	XM_005159975.4
si:dkey-27h10.2	ENSDART00000176451	j	si:dkey-27h10.2	XM_021476748.1
si:dkey-27h10.2	ENSDART00000176451	=	si:dkey-27h10.2	XM_001919825.6
hhip	ENSDART00000085051	=	hhip	NM_001080012.1
si:ch211-194g2.4	ENSDART00000132118	j	LOC110438575	XM_021476752.1
smad1	ENSDART00000033566	=	smad1	XM_005159965.4
smad1	ENSDART00000181541	=	smad1	NM_131356.1
-	-	u	LOC101886967	XR_002458990.1
BX276105.1	ENSDART00000180628	e	tceanc	XM_021476759.1
mmaa	ENSDART00000085021	=	mmaa	NM_001105112.1
mmaa	ENSDART00000085021	j	mmaa	XM_017355297.1
zgc:152968	ENSDART00000139636	=	zgc:152968	NM_001327755.1
znf827	ENSDART00000037516	j	znf827	XM_005159977.4
znf827	ENSDART00000037516	j	znf827	XM_001919166.7
znf827	ENSDART00000037516	j	znf827	XM_009292558.3
znf827	ENSDART00000037516	j	znf827	XM_005159980.4
znf827	ENSDART00000037516	=	znf827	XM_005159979.4
lsm6	ENSDART00000053773	=	lsm6	NM_001002077.2
lsm6	ENSDART00000147458	=	lsm6	XM_005159968.4
-	-	u	LOC100538006	XR_658569.2
-	-	u	LOC100538006	XR_658567.3
-	-	u	LOC100538006	XR_658568.2
-	-	u	LOC100538006	XR_658574.2
-	-	u	LOC100538006	XR_658566.3
pou4f2	ENSDART00000124112	=	pou4f2	NM_212807.1
ednraa	ENSDART00000187475	=	ednraa	XM_021476949.1
ednraa	ENSDART00000187475	j	ednraa	XM_021476969.1
ednraa	ENSDART00000010632	=	ednraa	NM_001099445.2
tmem184c	ENSDART00000111566	=	tmem184c	NM_001145596.1
prmt9	ENSDART00000053369	j	prmt9	XM_005159969.4
prmt9	ENSDART00000053369	=	prmt9	NM_001130767.1
arhgap10	ENSDART00000109314	=	arhgap10	NM_001045250.1
nr3c2	ENSDART00000172111	=	nr3c2	NM_001100403.1
dclk2a	ENSDART00000162971	=	dclk2a	XR_658585.3
dclk2a	ENSDART00000192580	j	dclk2a	XM_009292593.3
dclk2a	ENSDART00000192580	j	dclk2a	XR_001798664.2
dclk2a	ENSDART00000192580	j	dclk2a	XR_658584.3
dclk2a	ENSDART00000045111	=	dclk2a	NM_001145789.1
dclk2a	ENSDART00000078206	=	dclk2a	NM_001145787.1
dclk2a	ENSDART00000191004	=	dclk2a	NM_001135121.1
dclk2a	ENSDART00000043855	=	dclk2a	NM_001145788.1
fam193a	ENSDART00000171340	=	fam193a	NM_001328395.1
tnip2	ENSDART00000113542	=	tnip2	XM_687625.8
scpp1	ENSDART00000127579	=	scpp1	NM_001145240.1
sparcl1	ENSDART00000083593	=	sparcl1	NM_001130605.1
sparcl1	ENSDART00000191986	=	sparcl1	XM_021475590.1
-	-	u	LOC108190667	XR_001799884.2
si:dkeyp-13d11.1	ENSDART00000140181	=	LOC101883466	XM_005159994.4
si:dkeyp-13d11.1	ENSDART00000144669	=	LOC101883466	XM_017356255.2
si:dkey-6f10.4	ENSDART00000132318	=	si:dkeyp-13d11.2	XM_003197684.5
GALNTL6	ENSDART00000139448	=	si:ch211-15e22.3	XM_005159991.4
GALNTL6	ENSDART00000189756	=	si:ch211-15e22.3	NM_001145602.1
GALNTL6	ENSDART00000139448	i	LOC101883643	XR_658605.3
GALNTL6	ENSDART00000139448	i	LOC101883643	XR_222634.4
galnt7	ENSDART00000179352	=	galnt7	XM_005159986.4
galnt7	ENSDART00000079928	=	galnt7	NM_001020641.1
hmgb2a	ENSDART00000047159	=	hmgb2a	NM_001037424.1
hand2	ENSDART00000020409	=	hand2	NM_131626.3
fbxo8	ENSDART00000015323	j	fbxo8	XM_021475840.1
fbxo8	ENSDART00000015323	=	fbxo8	NM_001040307.1
cep44	ENSDART00000127635	j	cep44	XM_021475842.1
cep44	ENSDART00000127635	j	cep44	XM_021475843.1
cep44	ENSDART00000075086	=	cep44	NM_001076736.2
hpgd	ENSDART00000018533	=	hpgd	NM_001326541.1
hpgd	ENSDART00000018533	j	hpgd	XM_021475540.1
hpgd	ENSDART00000018533	j	hpgd	XR_002458421.1
hpgd	ENSDART00000018533	j	hpgd	XM_009292732.3
glra3	ENSDART00000009777	j	glra3	XM_021477569.1
glra3	ENSDART00000009777	=	glra3	NM_152965.1
glra3	ENSDART00000009777	i	LOC103908993	XR_658610.3
gpm6ab	ENSDART00000128794	=	gpm6ab	XM_005159981.4
gpm6ab	ENSDART00000130324	=	gpm6ab	NM_214687.1
gpm6ab	ENSDART00000148404	=	gpm6ab	XM_005159982.3
wdr17	ENSDART00000110824	j	wdr17	XM_005159989.4
wdr17	ENSDART00000110824	j	wdr17	XM_021475255.1
wdr17	ENSDART00000110824	j	wdr17	XM_009292668.3
wdr17	ENSDART00000110824	j	wdr17	XM_009292671.2
wdr17	ENSDART00000110824	j	wdr17	XM_009292681.3
wdr17	ENSDART00000110824	j	wdr17	XM_005159988.4
wdr17	ENSDART00000110824	=	wdr17	XM_009292675.3
wdr17	ENSDART00000170546	=	wdr17	NM_001201544.1
asb5b	ENSDART00000075230	j	asb5b	XM_009292651.2
asb5b	ENSDART00000075230	j	asb5b	XM_021474750.1
asb5b	ENSDART00000075230	j	asb5b	XM_021474745.1
asb5b	ENSDART00000075230	j	asb5b	XM_005159984.4
asb5b	ENSDART00000075230	=	asb5b	NM_001017753.1
spcs3	ENSDART00000166864	j	spcs3	NM_212948.1
vegfc	ENSDART00000101489	j	vegfc	XM_021468604.1
vegfc	ENSDART00000101489	j	vegfc	XM_021468593.1
vegfc	ENSDART00000101489	j	vegfc	XM_005159998.4
vegfc	ENSDART00000101489	=	vegfc	NM_205734.1
dre-mir-2197	ENSDART00000121133	=	mir2197	NR_030668.1
tenm3	ENSDART00000148701	x	LOC108190091	XR_001799329.2
tenm3	ENSDART00000084891	=	zgc:153720	NM_001076657.1
tenm3	ENSDART00000148701	j	tenm3	NM_130968.1
dctd	ENSDART00000053763	=	dctd	NM_001017639.1
irf2a	ENSDART00000130270	=	irf2a	NM_207054.2
irf2a	ENSDART00000131954	=	irf2a	NM_001326712.1
tmem134	ENSDART00000035739	=	tmem134	NM_200369.1
tmem134	ENSDART00000135791	=	tmem134	XM_021466898.1
stox2a	ENSDART00000149730	=	stox2a	XM_005160006.4
stox2a	ENSDART00000139354	=	stox2a	XM_001922863.7
stox2a	ENSDART00000139354	x	LOC110439845	XR_002458993.1
ing2	ENSDART00000160066	=	ing2	NM_001002448.1
sod3b	ENSDART00000112150	=	sod3b	XM_001332722.8
aip	ENSDART00000166251	=	aip	NM_214712.1
cdk2ap2	ENSDART00000165373	j	cdk2ap2	XM_009292801.3
cdk2ap2	ENSDART00000165373	=	cdk2ap2	NM_001009898.1
lgi2b	ENSDART00000101623	=	lgi2b	NM_001039642.1
ccdc149b	ENSDART00000011727	j	ccdc149b	XM_021471807.1
ccdc149b	ENSDART00000011727	j	ccdc149b	XM_005160001.4
ccdc149b	ENSDART00000011727	j	ccdc149b	XM_005160000.4
ccdc149b	ENSDART00000011727	=	ccdc149b	XM_009292789.3
ccdc149b	ENSDART00000011727	=	ccdc149b	NM_001002710.1
si:dkey-117m1.4	ENSDART00000136990	j	si:dkey-117m1.4	XM_021476796.1
si:dkey-117m1.4	ENSDART00000136990	=	si:dkey-117m1.4	XM_021476794.1
cntf	ENSDART00000147317	=	cntf	NM_001145632.1
si:ch211-113e8.11	ENSDART00000113954	=	si:ch211-113e8.11	XM_692566.7
si:ch211-113e8.10	ENSDART00000135647	=	si:ch211-113e8.10	XM_678183.9
si:ch211-113e8.10	ENSDART00000135647	j	si:ch211-113e8.10	XM_005160009.4
si:ch211-113e8.10	ENSDART00000135647	j	si:ch211-113e8.10	XM_005160008.4
si:ch211-113e8.10	ENSDART00000135647	j	si:ch211-113e8.10	XM_005160007.4
si:ch211-113e8.10	ENSDART00000135647	j	si:ch211-113e8.10	XM_021476803.1
zgc:152658	ENSDART00000101640	=	zgc:152658	NM_001076574.1
zgc:194443	ENSDART00000138072	=	zgc:194443	XM_005159995.4
zgc:194443	ENSDART00000074953	=	zgc:194443	NM_001130615.1
-	-	u	LOC103909020	XR_658644.3
si:ch211-113e8.9	ENSDART00000138886	j	si:ch211-113e8.9	XM_021476819.1
si:ch211-113e8.9	ENSDART00000138886	j	si:ch211-113e8.9	XM_009292868.3
si:ch211-113e8.9	ENSDART00000138886	j	si:ch211-113e8.9	XM_017356323.2
si:ch211-113e8.9	ENSDART00000142521	=	si:ch211-113e8.9	XM_017356289.2
si:ch211-113e8.9	ENSDART00000138886	j	si:ch211-113e8.9	XM_017356308.2
si:ch211-113e8.9	ENSDART00000138886	j	si:ch211-113e8.9	XM_009292867.3
si:ch211-113e8.9	ENSDART00000138886	j	si:ch211-113e8.9	XM_009292864.3
si:ch211-113e8.9	ENSDART00000138886	j	si:ch211-113e8.9	XM_017356329.2
si:ch211-113e8.9	ENSDART00000138886	j	si:ch211-113e8.9	XM_017356292.2
AL953865.1	ENSDART00000191987	n	LOC793449	XM_021477987.1
AL953865.1	ENSDART00000191987	n	LOC100330380	XM_021475890.1
si:ch211-113e8.5	ENSDART00000179679	k	si:ch211-113e8.5	NM_001328567.1
TESK1	ENSDART00000146680	=	si:ch211-113e8.3	XM_021476824.1
faah2a	ENSDART00000037553	=	faah2a	NM_001002700.2
TXN	ENSDART00000045697	=	zgc:56493	NM_200023.1
vwa10.1	ENSDART00000136916	k	vwa10.1	XM_021476833.1
vwa10.2	ENSDART00000138992	j	vwa10.2	XM_009292882.3
vwa10.2	ENSDART00000138992	=	vwa10.2	XM_680202.8
vwa10.2	ENSDART00000138992	j	vwa10.2	XM_009292885.3
maml3	ENSDART00000144135	k	maml3	XM_005160012.4
scoca	ENSDART00000122059	=	scoca	NM_001077559.1
scoca	ENSDART00000137047	=	scoca	XM_005160004.4
clgn	ENSDART00000101671	=	clgn	NM_001077541.1
clgn	ENSDART00000101671	j	clgn	XM_005160003.4
clgn	ENSDART00000101671	i	LOC108190121	XM_017356350.2
clgn	ENSDART00000101671	i	LOC108190121	XM_017356348.2
naa15b	ENSDART00000168067	=	naa15b	NM_203321.2
FO681323.1	ENSDART00000194832	y	LOC797949	XM_017356390.2
FO834828.1	ENSDART00000194555	=	LOC101885779	XM_017356391.2
FO681323.1	ENSDART00000194832	j	wu:fc34e06	XM_021476836.1
FO681323.1	ENSDART00000194832	j	wu:fc34e06	XM_021476851.1
FO681323.1	ENSDART00000194832	j	wu:fc34e06	XM_021476839.1
FO681323.1	ENSDART00000194832	j	wu:fc34e06	XR_002459000.1
FO681323.1	ENSDART00000194832	j	wu:fc34e06	XM_021476842.1
FO681323.1	ENSDART00000194832	j	wu:fc34e06	XM_021476837.1
FO681323.1	ENSDART00000194832	j	wu:fc34e06	XM_021476854.1
FO681323.1	ENSDART00000194832	j	wu:fc34e06	XM_021476843.1
FO681323.1	ENSDART00000194832	j	wu:fc34e06	XM_021476844.1
FO681323.1	ENSDART00000194832	j	wu:fc34e06	XM_021476846.1
zgc:153642	ENSDART00000093269	=	zgc:153642	NM_001077293.1
CU550714.1	ENSDART00000074839	n	LOC110439949	XM_021477995.1
htra3a	ENSDART00000080563	=	htra3a	NM_001003502.1
gpr78a	ENSDART00000111656	=	gpr78a	XM_680463.6
cpz	ENSDART00000147497	=	cpz	XM_680621.7
cpz	ENSDART00000147497	j	cpz	XM_005160021.4
hmx4	ENSDART00000027463	=	hmx4	NM_001045371.1
hmx1	ENSDART00000113087	=	hmx1	NM_001113526.1
adra2c	ENSDART00000101562	=	adra2c	NM_207639.1
lrpap1	ENSDART00000145272	=	lrpap1	NM_201306.1
dok7	ENSDART00000135369	j	dok7	XM_021476872.1
dok7	ENSDART00000135369	j	dok7	XM_681035.9
rgs12b	ENSDART00000022546	j	rgs12b	XM_005160017.4
rgs12b	ENSDART00000022546	=	rgs12b	NM_214724.1
rgs12b	ENSDART00000022546	j	rgs12b	XM_009292984.2
rgs12b	ENSDART00000022546	j	rgs12b	XM_009292979.2
rgs12b	ENSDART00000022546	j	rgs12b	XM_009293006.3
rgs12b	ENSDART00000022546	j	rgs12b	XM_009292995.3
rgs12b	ENSDART00000022546	j	rgs12b	XM_021481388.1
rgs12b	ENSDART00000022546	j	rgs12b	XR_002459982.1
htt	ENSDART00000074777	j	htt	XM_005160016.4
htt	ENSDART00000074777	j	htt	XM_009292964.3
htt	ENSDART00000074777	=	htt	NM_131018.1
htt	ENSDART00000074777	j	htt	XM_009292966.3
htt	ENSDART00000074777	j	htt	XM_009292973.3
htt	ENSDART00000074777	j	htt	XM_009292971.3
si:ch211-89o9.4	ENSDART00000148251	=	si:ch211-89o9.4	NM_001145593.2
paip2b	ENSDART00000010211	=	paip2b	NM_200766.1
dok1a	ENSDART00000134626	=	dok1a	XM_682484.8
si:ch211-89o9.6	ENSDART00000114449	=	si:ch211-89o9.6	XM_682563.7
dtx4	ENSDART00000114230	k	dtx4	XM_002660524.5
si:dkey-56e3.2	ENSDART00000139175	k	LOC565594	XM_021476859.1
si:dkey-56e3.3	ENSDART00000111367	j	si:dkey-56e3.3	XM_005160081.4
si:dkey-56e3.3	ENSDART00000111367	=	si:dkey-56e3.3	XM_005160080.4
mogs	ENSDART00000132189	=	mogs	XM_005160076.4
mogs	ENSDART00000183675	=	mogs	NM_001080190.1
-	-	u	LOC797711	XM_001338141.7
fbxo41	ENSDART00000145789	=	fbxo41	XM_691106.8
rnf24	ENSDART00000053681	j	rnf24	XM_005160065.4
rnf24	ENSDART00000053681	=	rnf24	NM_001007352.1
smox	ENSDART00000053685	=	smox	NM_001328186.1
smox	ENSDART00000053685	j	smox	XM_017359016.2
si:dkey-37g12.1	ENSDART00000084735	j	LOC110439712	XR_002458704.1
si:dkey-37g12.1	ENSDART00000084735	j	si:dkey-37g12.1	XM_021478002.1
CR392347.1	ENSDART00000146739	o	LOC797212	XM_001337635.5
adra1d	ENSDART00000014678	=	adra1d	XM_691951.6
ctnna2	ENSDART00000101306	j	ctnna2	XM_005160072.4
ctnna2	ENSDART00000101306	c	ctnna2	NM_001159372.1
si:ch211-71k14.1	ENSDART00000150124	j	LOC108190166	XR_002459002.1
si:ch211-71k14.1	ENSDART00000150124	j	LOC101882853	XR_222638.4
si:ch211-71k14.1	ENSDART00000150124	j	LOC101882853	XR_222639.4
lrrtm1	ENSDART00000133917	k	lrrtm1	XM_005160082.4
-	-	u	LOC110439713	XR_002458705.1
suclg1	ENSDART00000074609	=	suclg1	NM_001002577.2
cisd2	ENSDART00000074604	=	cisd2	NM_200383.1
SLC9B2	ENSDART00000074600	j	si:dkey-162b23.4	XM_005160083.4
SLC9B2	ENSDART00000074600	j	si:dkey-162b23.4	XM_694618.6
bdh2	ENSDART00000074597	j	bdh2	XM_005160068.4
bdh2	ENSDART00000132542	=	bdh2	XM_005160067.4
bdh2	ENSDART00000074597	=	bdh2	NM_001017809.1
tacr3a	ENSDART00000145044	=	tacr3a	NM_001256638.1
cnga1a	ENSDART00000134649	=	si:dkey-22i16.2	NM_001145623.1
enam	ENSDART00000132089	=	si:dkey-22i16.3	NM_001145556.1
scpp5	ENSDART00000113673	j	scpp5	XM_021474894.1
scpp5	ENSDART00000113673	=	scpp5	NM_001145236.1
scpp7	ENSDART00000109283	=	scpp7	NM_001145239.1
ambn	ENSDART00000121605	m	scpp6	XM_021476454.1
ambn	ENSDART00000121605	j	scpp6	NM_001145237.1
-	-	u	LOC110439846	XR_002459003.1
si:dkey-22i16.7	ENSDART00000132038	j	si:dkey-22i16.7	XM_017356409.2
odam	ENSDART00000137646	=	odam	NM_001145243.2
odam	ENSDART00000137646	j	odam	XM_021475908.1
scpp9	ENSDART00000129813	j	scpp9	XM_005160061.4
scpp9	ENSDART00000129813	=	scpp9	NM_001145245.1
si:dkey-22i16.9	ENSDART00000148883	=	si:dkey-22i16.9	XM_003197697.5
zgc:66472	ENSDART00000138447	=	zgc:66472	NM_199812.2
zgc:66472	ENSDART00000138447	j	zgc:66472	XM_005160062.4
si:dkey-22i16.10	ENSDART00000131337	j	LOC103909073	XM_021475891.1
si:ch73-109d9.1	ENSDART00000148932	c	si:ch73-109d9.1	XM_021476923.1
si:ch73-109d9.3	ENSDART00000160276	=	si:ch73-109d9.3	XM_005160085.4
si:ch73-109d9.2	ENSDART00000073746	j	si:ch73-109d9.2	XM_005160071.3
si:ch73-109d9.2	ENSDART00000073746	=	si:ch73-109d9.2	NM_001244778.1
si:ch73-109d9.4	ENSDART00000124873	k	LOC799968	XM_001340227.7
vwa11	ENSDART00000166912	k	vwa11	XM_009293262.3
vwa11	ENSDART00000166912	k	vwa11	XM_021476927.1
-	-	u	LOC103909118	XM_009293415.3
-	-	u	LOC110439847	XR_002459004.1
cabp2a	ENSDART00000160542	j	cabp2a	XM_009293387.3
cabp2a	ENSDART00000160542	=	cabp2a	NM_001030268.2
slc43a3a	ENSDART00000083213	=	slc43a3a	XM_009293393.3
slc43a3a	ENSDART00000166618	=	slc43a3a	NM_001201344.1
slc43a3a	ENSDART00000083213	j	slc43a3a	XM_009293397.3
slc43a3a	ENSDART00000083213	j	slc43a3a	XM_017355573.2
ctnnd1	ENSDART00000106048	j	ctnnd1	XM_021476936.1
ctnnd1	ENSDART00000106048	j	ctnnd1	XM_021476934.1
ctnnd1	ENSDART00000106048	j	ctnnd1	XM_021476943.1
ctnnd1	ENSDART00000106048	j	ctnnd1	XM_009293431.3
ctnnd1	ENSDART00000106048	j	ctnnd1	XM_009293418.3
ctnnd1	ENSDART00000106048	j	ctnnd1	XM_021476938.1
ctnnd1	ENSDART00000106048	j	ctnnd1	XM_009293437.3
ctnnd1	ENSDART00000106048	j	ctnnd1	XM_021476944.1
timm10	ENSDART00000100321	=	timm10	NM_001002678.3
unc93b1	ENSDART00000159686	=	unc93b1	XM_009293277.3
unc93b1	ENSDART00000025145	=	unc93b1	NM_001288816.1
cryba1l2	ENSDART00000110148	=	cryba1l2	NM_001005965.2
crybb1l2	ENSDART00000100309	=	crybb1l2	NM_001100437.1
rtn4rl2a	ENSDART00000073736	=	rtn4rl2a	NM_203479.1
zdhhc5a	ENSDART00000147702	j	zdhhc5a	XM_005160247.4
zdhhc5a	ENSDART00000147702	j	zdhhc5a	XR_222664.4
zdhhc5a	ENSDART00000147702	j	zdhhc5a	XM_005160246.4
zdhhc5a	ENSDART00000147702	j	zdhhc5a	XM_005160244.4
zdhhc5a	ENSDART00000147702	j	zdhhc5a	XM_009293347.3
zdhhc5a	ENSDART00000003497	=	zdhhc5a	NM_001039640.1
tmx2b	ENSDART00000009858	=	tmx2b	NM_001002113.1
med19b	ENSDART00000003022	=	med19b	NM_001003416.2
slc43a1b	ENSDART00000081835	=	slc43a1b	NM_001083000.1
si:dkey-28b4.8	ENSDART00000133210	=	si:dkey-28b4.8	XM_679135.8
si:dkey-28b4.7	ENSDART00000139036	=	si:dkey-28b4.7	NM_001256200.1
ssrp1b	ENSDART00000131296	j	ssrp1b	XM_021476947.1
ssrp1b	ENSDART00000131296	j	ssrp1b	XM_001923121.6
ssrp1b	ENSDART00000131296	j	ssrp1b	XM_021476950.1
p2rx3b	ENSDART00000133926	j	p2rx3b	XM_021466489.1
p2rx3b	ENSDART00000133926	=	p2rx3b	NM_198986.3
si:dkey-9i23.4	ENSDART00000073717	=	si:dkey-9i23.4	NM_001145608.1
si:dkey-9i23.5	ENSDART00000145895	=	si:dkey-9i23.5	NM_001145609.1
si:dkey-9i23.6	ENSDART00000144511	=	si:dkey-9i23.6	XM_695503.6
tmem187	ENSDART00000073712	k	tmem187	XM_001341435.8
si:dkey-9i23.8	ENSDART00000139044	=	si:dkey-9i23.8	XM_009293487.3
ndufs8a	ENSDART00000059227	=	ndufs8a	NM_213139.1
STX3	ENSDART00000146962	=	zgc:165520	NM_001308827.1
STX3	ENSDART00000142091	=	zgc:165520	NR_131945.1
kdm2aa	ENSDART00000162779	=	kdm2aa	NM_001081692.2
kdm2aa	ENSDART00000162779	j	kdm2aa	XM_009293357.3
kdm2aa	ENSDART00000162779	j	kdm2aa	XM_005160248.4
kdm2aa	ENSDART00000162779	j	kdm2aa	XM_009293362.3
kdm2aa	ENSDART00000162779	j	kdm2aa	XM_009293365.3
tcirg1a	ENSDART00000145354	=	tcirg1a	XM_005160272.4
wu:fc21g02	ENSDART00000142820	j	wu:fc21g02	XM_005160267.4
wu:fc21g02	ENSDART00000142820	j	wu:fc21g02	XM_005160269.4
wu:fc21g02	ENSDART00000142820	=	wu:fc21g02	XM_005160268.4
si:dkey-9i23.15	ENSDART00000134635	=	si:dkey-9i23.15	NM_001145559.1
si:dkey-9i23.14	ENSDART00000147527	n	si:dkey-9i23.14	XM_021476974.1
tmem176	ENSDART00000134464	=	tmem176	XM_005160251.4
tmem176	ENSDART00000097500	j	tmem176	XM_021475748.1
tmem176	ENSDART00000097500	=	tmem176	NM_001145610.1
si:dkey-9i23.16	ENSDART00000141145	=	si:dkey-9i23.16	NM_001145611.1
vps37c	ENSDART00000067621	=	vps37c	NM_001077785.1
CU929294.2	ENSDART00000194400	j	cd5	XM_005160273.3
CU929294.2	ENSDART00000194400	j	cd5	XM_017356437.2
CU929294.1	ENSDART00000184610	j	tmem132a	XM_021476980.1
CU929294.1	ENSDART00000184610	j	tmem132a	XM_021476981.1
dnaja1	ENSDART00000021336	=	dnaja1	NM_199662.1
smu1b	ENSDART00000073694	=	smu1b	XM_003197701.5
smu1b	ENSDART00000073694	j	smu1b	XM_017356438.2
rps6	ENSDART00000023336	=	rps6	NM_001003728.1
btr01	ENSDART00000073689	=	btr01	XM_686415.8
si:ch211-151p13.8	ENSDART00000129819	=	si:ch211-151p13.8	XM_005160274.4
muc13a	ENSDART00000142702	j	muc13a	XM_005160276.4
muc13a	ENSDART00000142702	j	muc13a	XM_003197702.5
si:ch211-239f4.6	ENSDART00000144997	j	LOC799879	XM_009293534.3
mucms1	ENSDART00000131882	c	LOC799643	XM_017355893.2
zgc:111983	ENSDART00000034549	=	zgc:111983	NM_001017803.1
ddx39aa	ENSDART00000014727	=	ddx39aa	NM_001328342.1
si:ch211-239f4.1	ENSDART00000179983	j	si:ch211-239f4.1	XM_009293540.3
si:ch211-239f4.1	ENSDART00000179983	j	si:ch211-239f4.1	XM_021477008.1
si:ch211-239f4.1	ENSDART00000179983	j	si:ch211-239f4.1	XM_009293538.3
-	-	u	LOC110439860	XR_002459032.1
LO017716.1	ENSDART00000194012	=	LOC110439861	XM_021477019.1
si:ch73-90k17.1	ENSDART00000133572	=	si:ch73-90k17.1	XM_009293652.3
emp1	ENSDART00000132366	j	emp1	XM_005160032.4
emp1	ENSDART00000132366	j	emp1	XM_005160031.4
emp1	ENSDART00000132366	j	emp1	XM_009293581.3
emp1	ENSDART00000132366	j	emp1	XM_005160034.4
emp1	ENSDART00000132366	j	emp1	XM_021475943.1
emp1	ENSDART00000132366	j	emp1	XM_009293596.3
emp1	ENSDART00000132366	=	emp1	NM_001256730.1
emp1	ENSDART00000132366	j	emp1	XM_021475939.1
zgc:101679	ENSDART00000110390	n	zgc:101679	NM_001006078.1
zgc:101679	ENSDART00000148289	=	zgc:101679	XM_021473414.1
zgc:101679	ENSDART00000110390	=	zgc:101679	XM_005160037.4
si:ch211-243a20.4	ENSDART00000173024	=	si:ch211-243a20.4	XM_009293654.3
si:ch211-243a20.3	ENSDART00000145486	=	si:ch211-243a20.3	NM_001145709.1
grin2bb	ENSDART00000143664	j	grin2bb	XM_017355013.2
grin2bb	ENSDART00000143664	j	grin2bb	XM_017355012.2
grin2bb	ENSDART00000143664	=	grin2bb	NM_001128337.2
grin2bb	ENSDART00000143664	k	grin2bb	XM_017355011.2
grin2bb	ENSDART00000143664	k	grin2bb	XM_017355008.2
atf7ip	ENSDART00000149155	j	atf7ip	XM_005160048.4
atf7ip	ENSDART00000149155	j	atf7ip	XM_005160041.3
atf7ip	ENSDART00000149155	j	atf7ip	XM_021475024.1
atf7ip	ENSDART00000149155	j	atf7ip	XM_021475019.1
atf7ip	ENSDART00000149155	j	atf7ip	XM_005160045.4
atf7ip	ENSDART00000149155	j	atf7ip	XM_021475032.1
atf7ip	ENSDART00000149155	=	atf7ip	NM_001077603.2
atf7ip	ENSDART00000149155	j	atf7ip	XM_005160043.4
atf7ip	ENSDART00000149155	j	atf7ip	XM_005160044.4
sept3	ENSDART00000181757	=	sept3	XM_005160040.4
sept3	ENSDART00000044057	=	sept3	NM_001024418.1
BX511120.1	ENSDART00000186881	o	LOC103909155	XM_021478006.1
serhl	ENSDART00000042158	=	serhl	NM_199615.2
trappc5	ENSDART00000038574	=	trappc5	NM_001002482.1
trappc5	ENSDART00000141144	=	trappc5	XM_005160036.4
mcoln1a	ENSDART00000146101	=	mcoln1a	NM_001328165.1
si:ch211-214c7.4	ENSDART00000143363	=	si:ch211-214c7.4	XM_684096.8
si:ch211-214c7.5	ENSDART00000101410	=	si:ch211-214c7.5	NM_001089578.1
pkn1a	ENSDART00000084512	=	pkn1a	XM_005160051.4
pkn1a	ENSDART00000132555	j	pkn1a	XM_684239.7
pkn1a	ENSDART00000132555	j	pkn1a	XM_005160050.4
-	-	u	LOC103909160	XR_658868.1
map2k7	ENSDART00000148086	=	map2k7	XM_005160049.4
map2k7	ENSDART00000048191	=	map2k7	NM_001190306.1
pnpla6	ENSDART00000140890	j	pnpla6	XM_005160053.4
pnpla6	ENSDART00000140890	=	pnpla6	XM_001921173.6
pnpla6	ENSDART00000140890	j	pnpla6	XM_005160052.4
lipt1	ENSDART00000033669	=	lipt1	NM_001075102.2
eif5b	ENSDART00000074689	=	eif5b	XM_001923538.8
eif5b	ENSDART00000074689	j	eif5b	XM_009293741.3
arhgef7b	ENSDART00000108528	j	arhgef7b	XM_017354714.2
arhgef7b	ENSDART00000108528	=	arhgef7b	NM_001008624.1
arhgef7b	ENSDART00000108528	j	arhgef7b	XM_021474150.1
arhgef7b	ENSDART00000108528	i	LOC103909161	XR_658874.2
arhgef7b	ENSDART00000108528	i	LOC103909161	XR_002459056.1
arhgef7b	ENSDART00000108528	i	LOC103909161	XR_002459058.1
arhgef7b	ENSDART00000108528	i	LOC103909161	XR_658877.2
arhgef7b	ENSDART00000108528	i	LOC103909161	XR_002459049.1
arhgef7b	ENSDART00000108528	i	LOC103909161	XR_002459047.1
arhgef7b	ENSDART00000108528	i	LOC103909161	XR_658879.2
arhgef7b	ENSDART00000108528	i	LOC103909161	XR_658873.2
arhgef7b	ENSDART00000108528	i	LOC103909161	XR_002459051.1
arhgef7b	ENSDART00000108528	i	LOC103909161	XR_002459055.1
arhgef7b	ENSDART00000108528	j	arhgef7b	XM_017354716.2
arhgef7b	ENSDART00000042086	=	arhgef7b	XM_017354718.2
si:ch211-138g9.2	ENSDART00000132705	j	LOC563925	XM_021475892.1
sox1b	ENSDART00000010894	=	sox1b	NM_001037662.1
si:ch211-138g9.3	ENSDART00000143908	j	LOC100002818	XM_017357026.2
atp11a	ENSDART00000150029	=	atp11a	XM_021477091.1
atp11a	ENSDART00000150029	j	atp11a	XM_021477083.1
atp11a	ENSDART00000150029	j	atp11a	XM_021477088.1
atp11a	ENSDART00000150029	j	atp11a	XM_021477098.1
atp11a	ENSDART00000150029	j	atp11a	XM_021477095.1
atp11a	ENSDART00000150029	j	atp11a	XM_021477100.1
tubgcp3	ENSDART00000042064	=	tubgcp3	XM_005170995.4
tubgcp3	ENSDART00000143228	=	tubgcp3	NM_001004513.1
mcf2la	ENSDART00000114083	j	mcf2la	XM_005171009.4
mcf2la	ENSDART00000114083	j	mcf2la	XM_021477106.1
mcf2la	ENSDART00000114083	j	mcf2la	XM_005171007.4
mcf2la	ENSDART00000114083	j	mcf2la	XM_001922148.7
mcf2la	ENSDART00000114083	j	mcf2la	XM_021477126.1
mcf2la	ENSDART00000114083	j	mcf2la	XM_021477110.1
mcf2la	ENSDART00000114083	j	mcf2la	XM_021477116.1
si:busm1-105l16.2	ENSDART00000178072	j	si:busm1-105l16.2	NM_001007209.1
si:busm1-105l16.2	ENSDART00000178072	k	si:busm1-105l16.2	XM_005170975.4
si:busm1-105l16.2	ENSDART00000178072	j	si:busm1-105l16.2	XM_021481071.1
si:busm1-105l16.2	ENSDART00000178072	j	si:busm1-105l16.2	NM_001007210.1
mcf2la	ENSDART00000114083	j	mcf2la	XM_021477133.1
mcf2la	ENSDART00000114083	j	mcf2la	XM_021477145.1
cab39l	ENSDART00000053240	j	cab39l	XM_005170986.4
cab39l	ENSDART00000053240	=	cab39l	NM_001007327.1
cdadc1	ENSDART00000148893	m	cdadc1	XM_005170987.4
cdadc1	ENSDART00000148893	=	cdadc1	XM_005170988.4
cdadc1	ENSDART00000053232	=	cdadc1	NM_001007448.1
rcbtb1	ENSDART00000053222	=	rcbtb1	NM_199991.1
rcbtb1	ENSDART00000053222	j	rcbtb1	XM_005170970.4
arl11	ENSDART00000053221	=	arl11	NM_199693.1
ebpl	ENSDART00000134450	=	ebpl	NM_001005397.1
kpna3	ENSDART00000074519	=	kpna3	NM_201320.2
spryd7a	ENSDART00000074514	=	spryd7a	NM_214776.1
BX294379.1	ENSDART00000142880	x	LOC103909193	XR_658945.3
dre-mir-16b	ENSDART00000117230	=	mir16b	NR_030007.1
dre-mir-15a-1	ENSDART00000117434	=	mir15a-1	NR_030003.1
BX294379.1	ENSDART00000142880	j	LOC108190346	XR_001799507.2
BX294379.1	ENSDART00000142880	=	LOC108190346	XR_002459078.1
-	-	u	LOC101884727	XM_021477153.1
si:ch73-160h15.3	ENSDART00000142406	=	si:ch73-160h15.3	NM_001278811.1
agpat3	ENSDART00000115081	j	agpat3	XM_005170977.4
agpat3	ENSDART00000115081	=	agpat3	NM_213425.1
agpat3	ENSDART00000115081	j	agpat3	XM_009293837.3
agpat3	ENSDART00000115081	j	agpat3	XM_021470376.1
agpat3	ENSDART00000115081	j	agpat3	XM_021470311.1
agpat3	ENSDART00000115081	j	agpat3	XM_021470393.1
agpat3	ENSDART00000115081	j	agpat3	XM_009293825.3
agpat3	ENSDART00000115081	j	agpat3	XM_005170978.4
agpat3	ENSDART00000115081	j	agpat3	XM_005170976.4
agpat3	ENSDART00000115081	j	agpat3	XM_009293841.3
agpat3	ENSDART00000115081	j	agpat3	XM_009293826.3
pdxkb	ENSDART00000142560	=	pdxkb	NM_001145586.1
tmprss3b	ENSDART00000132843	j	LOC101885235	XM_005171014.4
pknox1.2	ENSDART00000125032	j	pknox1.2	XM_005171012.3
pknox1.2	ENSDART00000125032	j	pknox1.2	XM_702776.7
pknox1.2	ENSDART00000125032	j	pknox1.2	XM_009294000.3
si:dkey-22n8.3	ENSDART00000129072	=	si:dkey-22n8.3	XM_003197714.5
itsn1	ENSDART00000132378	j	itsn1	XM_005170971.4
itsn1	ENSDART00000132378	j	itsn1	XM_005170972.4
itsn1	ENSDART00000160817	=	itsn1	NM_207182.1
itsn1	ENSDART00000132378	j	itsn1	XM_005170974.4
cryzl1	ENSDART00000036783	j	cryzl1	XM_005170981.4
cryzl1	ENSDART00000036783	=	cryzl1	NM_001002633.1
setd4	ENSDART00000053157	=	setd4	NM_001045562.1
mhc1zea	ENSDART00000101143	=	mhc1zea	XM_005171000.4
mhc1zea	ENSDART00000101143	j	mhc1zea	XM_005170997.4
mhc1zea	ENSDART00000101143	j	mhc1zea	XM_017355317.2
mhc1zea	ENSDART00000101143	c	mhc1zea	XM_021475518.1
mhc1zea	ENSDART00000176803	=	mhc1zea	NM_001045563.1
mhc1zda	ENSDART00000157657	j	mhc1zda	XM_021476735.1
mhc1zda	ENSDART00000158696	=	mhc1zda	XM_005170991.4
mhc1zda	ENSDART00000157657	=	mhc1zda	NM_001287097.1
mhc1zca	ENSDART00000063529	j	mhc1zca	XR_002458104.1
mhc1zca	ENSDART00000063529	j	mhc1zca	XM_021474930.1
mhc1zca	ENSDART00000063529	j	mhc1zca	XR_002458102.1
mhc1zca	ENSDART00000063529	=	mhc1zca	NM_001083545.1
mhc1zba	ENSDART00000053153	x	LOC103909196	XR_658949.3
mhc1zba	ENSDART00000053153	x	LOC103909196	XR_658950.3
mhc1zba	ENSDART00000053153	=	mhc1zba	NM_001110118.1
cbr1	ENSDART00000053152	j	cbr1	XM_009293817.3
cbr1	ENSDART00000053152	=	cbr1	NM_194406.1
morc3b	ENSDART00000158432	=	morc3b	NM_001003579.1
bcl9	ENSDART00000053284	j	bcl9	XM_005170984.4
bcl9	ENSDART00000053284	j	bcl9	XM_005170983.4
bcl9	ENSDART00000053284	=	bcl9	XM_005170982.4
bcl9	ENSDART00000113559	=	bcl9	NM_001005604.1
gja5b	ENSDART00000101104	=	gja5b	NM_001034988.1
gja8b	ENSDART00000007262	=	gja8b	NM_131809.2
fstl1a	ENSDART00000015046	=	fstl1a	NM_001017860.1
lrrc58a	ENSDART00000114746	=	lrrc58a	NM_001145622.1
stn1	ENSDART00000027624	=	stn1	NM_200389.1
sh3pxd2aa	ENSDART00000153746	j	sh3pxd2aa	XM_005170994.4
sh3pxd2aa	ENSDART00000153746	j	sh3pxd2aa	XM_021475323.1
sh3pxd2aa	ENSDART00000153746	j	sh3pxd2aa	XM_009293909.3
sh3pxd2aa	ENSDART00000153746	j	sh3pxd2aa	XM_021475316.1
sh3pxd2aa	ENSDART00000153746	k	sh3pxd2aa	XM_009293905.3
sh3pxd2aa	ENSDART00000153746	j	sh3pxd2aa	XM_021475313.1
sh3pxd2aa	ENSDART00000084457	=	sh3pxd2aa	NM_001160022.1
neurl1aa	ENSDART00000101079	j	neurl1aa	NM_001077558.1
neurl1aa	ENSDART00000101079	j	neurl1aa	XM_021475292.1
cfap58	ENSDART00000101066	=	cfap58	NM_001077556.3
FO818719.1	ENSDART00000171182	j	sorcs3	XM_021477188.1
si:ch211-112b1.2	ENSDART00000150254	k	LOC100332340	XM_021477192.1
si:ch211-112b1.2	ENSDART00000150254	k	LOC100332340	XR_002459094.1
-	-	u	LOC101885528	XR_002459100.1
-	-	u	LOC101885528	XR_002459097.1
-	-	u	LOC110437846	XR_002459095.1
CR788248.1	ENSDART00000150459	o	LOC101886909	XR_222642.4
cxcl18b	ENSDART00000111598	=	cxcl18b	NM_001115060.1
si:ch73-6k14.2	ENSDART00000150386	=	si:ch73-6k14.2	XM_021477215.1
caly	ENSDART00000137179	=	caly	NM_001326550.1
msx1b	ENSDART00000008468	=	msx1b	NM_131260.1
si:dkeyp-80c12.8	ENSDART00000144349	=	si:dkeyp-80c12.8	XM_021476812.1
si:dkeyp-80c12.8	ENSDART00000184496	=	si:dkeyp-80c12.8	NM_001326552.1
si:dkeyp-80c12.7	ENSDART00000074317	=	si:dkeyp-80c12.7	NM_001145688.1
taf5	ENSDART00000015007	=	taf5	NM_001037431.1
atp5md	ENSDART00000150789	=	si:dkeyp-80c12.10	NM_001200033.1
pdcd11	ENSDART00000124833	j	pdcd11	XM_005160117.4
pdcd11	ENSDART00000124833	=	pdcd11	NM_001089368.2
zgc:175214	ENSDART00000137357	j	zgc:175214	NM_001114727.1
zgc:175214	ENSDART00000137357	=	zgc:175214	XM_005160114.4
si:dkeyp-80c12.5	ENSDART00000187294	j	calhm1	XM_005160119.4
si:dkeyp-80c12.4	ENSDART00000052998	=	LOC794408	XM_001334343.7
zp3c	ENSDART00000189845	=	zp3c	NM_001327993.1
zp3c	ENSDART00000143474	=	zp3c	NM_001327992.1
si:ch211-281g13.5	ENSDART00000113315	j	si:ch211-281g13.5	XM_021475845.1
si:ch211-281g13.5	ENSDART00000113315	j	si:ch211-281g13.5	XM_017355671.2
si:ch211-281g13.5	ENSDART00000113315	j	si:ch211-281g13.5	XM_005160109.4
si:ch211-281g13.5	ENSDART00000113315	=	si:ch211-281g13.5	NM_001145631.1
slc47a2.2	ENSDART00000145960	j	zgc:163136	XM_021475008.1
slc47a2.2	ENSDART00000145960	j	zgc:163136	NM_001098763.1
si:ch211-281g13.4	ENSDART00000138510	j	si:ch211-281g13.4	XM_005160118.4
si:ch211-281g13.4	ENSDART00000138510	=	si:ch211-281g13.4	NM_001145702.1
col17a1a	ENSDART00000142957	j	col17a1a	XM_021474972.1
col17a1a	ENSDART00000142957	j	col17a1a	XM_005160111.4
col17a1a	ENSDART00000142957	j	col17a1a	XM_017354917.2
col17a1a	ENSDART00000142957	=	col17a1a	NM_001145565.1
col17a1a	ENSDART00000142957	j	col17a1a	XM_005160112.4
slkb	ENSDART00000134399	=	slkb	NM_001328385.1
slkb	ENSDART00000134399	j	slkb	XM_017355178.2
tsga10	ENSDART00000074380	j	tsga10	XM_009294094.2
tsga10	ENSDART00000074380	j	tsga10	XM_005160116.2
tsga10	ENSDART00000074380	j	tsga10	XM_009294088.2
tsga10	ENSDART00000074380	=	tsga10	XM_009294092.2
tsga10	ENSDART00000191296	=	tsga10	NM_001077289.2
si:ch211-149l1.2	ENSDART00000140824	j	si:ch211-149l1.2	XM_021477238.1
si:ch211-149l1.2	ENSDART00000140824	j	si:ch211-149l1.2	XM_005160123.4
si:ch211-149l1.2	ENSDART00000140824	j	si:ch211-149l1.2	XM_695112.9
si:ch211-149l1.2	ENSDART00000140824	j	si:ch211-149l1.2	XM_005160121.4
si:ch211-149l1.2	ENSDART00000140824	j	si:ch211-149l1.2	XM_021477231.1
lef1	ENSDART00000132405	=	lef1	NM_131426.1
hadh	ENSDART00000050603	=	hadh	NM_001003515.1
cyp2u1	ENSDART00000048281	j	cyp2u1	XM_021474923.1
cyp2u1	ENSDART00000048281	=	cyp2u1	NM_001145564.1
sgms2a	ENSDART00000141476	c	sgms2	XM_017354910.2
sgms2a	ENSDART00000141476	=	sgms2	NM_001145563.1
gstcd	ENSDART00000134661	j	gstcd	XM_009294165.3
gstcd	ENSDART00000134661	j	gstcd	XM_021468321.1
gstcd	ENSDART00000134661	j	gstcd	XM_005160086.4
gstcd	ENSDART00000134661	=	gstcd	NM_001024462.1
npnt	ENSDART00000158988	j	npnt	XM_005160098.4
npnt	ENSDART00000158988	j	npnt	XM_009294216.3
npnt	ENSDART00000158988	j	npnt	XM_009294219.3
npnt	ENSDART00000018469	=	npnt	NM_001145580.1
tbck	ENSDART00000125099	=	tbck	XM_005160101.4
tbck	ENSDART00000175142	=	tbck	NM_001080637.2
aimp1	ENSDART00000084184	=	aimp1	NM_001045851.1
dkk2	ENSDART00000114098	=	dkk2	NM_001111209.1
papss1	ENSDART00000024984	=	papss1	NM_001128699.1
-	-	u	LOC101885315	XM_005160102.4
pkd2	ENSDART00000020412	j	pkd2	XM_017353790.2
pkd2	ENSDART00000020412	j	pkd2	XM_009294193.3
pkd2	ENSDART00000020412	=	pkd2	NM_001002310.1
abcg2d	ENSDART00000146892	j	abcg2d	XM_009294223.3
abcg2d	ENSDART00000022733	=	abcg2d	NM_001042772.1
ppm1k	ENSDART00000148285	j	ppm1k	XM_005160093.4
ppm1k	ENSDART00000148285	=	ppm1k	NM_001327744.1
ppm1k	ENSDART00000148285	j	ppm1k	XM_005160091.4
ppm1k	ENSDART00000148285	j	ppm1k	XM_005160094.4
si:ch73-190m4.1	ENSDART00000111114	j	si:ch73-190m4.1	XM_017355897.2
herc3	ENSDART00000141977	=	herc3	NM_001145624.1
fam13a	ENSDART00000080389	j	fam13a	XM_021477266.1
fam13a	ENSDART00000080389	j	fam13a	XM_017356507.2
fam13a	ENSDART00000080389	j	fam13a	XM_009294259.3
fam13a	ENSDART00000080389	j	fam13a	XM_678637.7
fam13a	ENSDART00000080389	k	fam13a	XM_005160105.4
fam13a	ENSDART00000080389	j	fam13a	XM_005160107.4
fam13a	ENSDART00000080389	j	fam13a	XM_005160104.4
zgc:154142	ENSDART00000163939	=	zgc:154142	NM_001099240.1
si:dkeyp-123h10.2	ENSDART00000132779	=	si:dkeyp-123h10.2	XM_021477275.1
si:dkeyp-123h10.2	ENSDART00000137648	=	si:dkeyp-123h10.2	XM_005155400.3
otx2a	ENSDART00000006538	=	otx1a	NM_131215.3
mdh1aa	ENSDART00000012842	=	mdh1aa	NM_001309523.2
mdh1aa	ENSDART00000022290	=	mdh1aa	NM_001316925.1
mdh1aa	ENSDART00000022290	=	mdh1aa	NM_199947.3
ugp2a	ENSDART00000010449	j	ugp2a	XM_005155398.4
ugp2a	ENSDART00000010449	=	ugp2a	NM_001145557.1
spast	ENSDART00000035150	=	spast	NM_212915.2
spast	ENSDART00000035150	j	spast	XM_005155397.3
dpy30	ENSDART00000024743	=	dpy30	NM_001002438.2
dpy30	ENSDART00000134065	=	dpy30	NR_130111.1
psen2	ENSDART00000006381	=	psen2	NM_131514.2
srd5a2a	ENSDART00000064007	=	srd5a2a	NM_001017703.1
srd5a2a	ENSDART00000064007	x	LOC108190350	XR_001799513.2
jag1a	ENSDART00000047851	=	jag1a	NM_131861.1
jag1a	ENSDART00000137172	=	jag1a	XM_005168204.4
jag1a	ENSDART00000047851	n	jag1a	XM_005168205.4
jag1a	ENSDART00000047851	j	jag1a	XR_002459114.1
btbd3a	ENSDART00000014970	=	btbd3a	NM_001145581.1
btbd3a	ENSDART00000014970	j	btbd3a	XM_005168206.3
esf1	ENSDART00000146612	=	esf1	NM_199745.2
ndufaf5	ENSDART00000138878	=	ndufaf5	NM_001082894.1
kif16ba	ENSDART00000164016	k	kif16ba	XM_009294326.3
mast1a	ENSDART00000186753	n	mast1a	XM_009294431.3
mast1a	ENSDART00000063938	=	mast1a	XM_001337092.6
atg4da	ENSDART00000152289	=	atg4da	XM_009294436.3
atg4da	ENSDART00000063936	m	atg4da	XM_009294437.3
atg4da	ENSDART00000063936	m	atg4da	XM_021477303.1
actr2a	ENSDART00000074294	j	actr2a	XM_021470433.1
actr2a	ENSDART00000074294	=	actr2a	NM_213499.1
spred2a	ENSDART00000074284	n	spred2a	XM_681645.6
meis1a	ENSDART00000028018	j	meis1a	XM_005160124.4
meis1a	ENSDART00000028018	j	meis1a	XM_005160125.3
meis1a	ENSDART00000028018	=	meis1a	NM_131897.2
etaa1	ENSDART00000152789	k	etaa1	XM_009294369.2
etaa1	ENSDART00000152789	=	etaa1	NM_001111157.1
ppp3r1b	ENSDART00000100869	=	ppp3r1b	NM_001004553.1
ppp3r1b	ENSDART00000100869	j	ppp3r1b	XM_005160126.4
cnrip1a	ENSDART00000130828	=	cnrip1a	NM_001003607.2
FBXO48	ENSDART00000129052	=	fbxo48	NM_001328025.1
FBXO48	ENSDART00000152185	=	fbxo48	NM_001328024.1
FBXO48	ENSDART00000152237	=	fbxo48	NM_001328023.1
FBXO48	ENSDART00000152595	=	fbxo48	NM_001328021.1
zgc:165656	ENSDART00000165117	k	si:ch1073-147h9.1	XM_009294466.3
zgc:165656	ENSDART00000165117	k	si:ch1073-147h9.1	XM_009294461.3
zgc:165656	ENSDART00000165117	j	si:ch1073-147h9.1	XM_009294463.3
prokr1a	ENSDART00000113853	j	prokr1a	XM_005160127.4
prokr1a	ENSDART00000113853	=	prokr1a	NM_001173406.1
snrpb2	ENSDART00000152745	=	snrpb2	NM_001256190.1
rnaseh2a	ENSDART00000045894	=	rnaseh2a	NM_200226.2
prdx2	ENSDART00000040397	=	prdx2	NM_001002468.2
junba	ENSDART00000122628	=	junba	NM_213556.3
junba	ENSDART00000109640	=	junba	XM_017353483.2
BX548032.3	ENSDART00000150757	=	si:ch211-145g9.7	XR_002458706.1
BX548032.3	ENSDART00000156349	j	si:ch211-145g9.7	XR_222644.4
dand5	ENSDART00000052992	=	dand5	NM_212969.1
BX548032.1	ENSDART00000141773	=	LOC103909283	XR_659109.2
nfixa	ENSDART00000167139	j	LOC110437879	XM_021477329.1
nfixa	ENSDART00000135861	=	LOC110437879	XM_021477334.1
nfixa	ENSDART00000167139	j	LOC110437879	XM_021477335.1
nfixa	ENSDART00000167139	j	LOC103909284	XM_021477322.1
nfixa	ENSDART00000167139	j	LOC103909284	XM_021477317.1
nfixa	ENSDART00000167139	j	LOC103909284	XM_021477320.1
rad23aa	ENSDART00000149939	=	rad23aa	NM_001003739.1
rnf11a	ENSDART00000018817	=	rnf11a	NM_201021.1
asna1	ENSDART00000007079	=	asna1	NM_001002298.2
best2	ENSDART00000111165	j	best2	XM_690505.4
rab3da	ENSDART00000023757	=	rab3da	NM_001145597.1
pld6	ENSDART00000083946	=	pld6	NM_001089414.1
cnn1a	ENSDART00000010236	=	cnn1a	NM_001145598.1
si:dkey-121b10.7	ENSDART00000132638	=	si:dkey-121b10.7	XM_001337952.5
LO017718.1	ENSDART00000194191	j	LOC108185957	XM_021478013.1
si:ch211-217k17.9	ENSDART00000143225	j	si:ch211-217k17.9	XM_021478016.1
zgc:194101	ENSDART00000111256	=	zgc:194101	NM_001128803.1
si:ch211-217k17.12	ENSDART00000138337	=	si:ch211-217k17.12	XM_700349.7
si:ch211-217k17.11	ENSDART00000144676	=	si:ch211-217k17.11	XM_001339238.7
si:ch211-217k17.10	ENSDART00000140740	=	si:ch211-217k17.10	NM_001128804.1
si:ch211-217k17.7	ENSDART00000083836	=	si:ch211-217k17.7	NM_001145359.1
glb1	ENSDART00000124682	=	glb1	XM_005160132.4
glb1	ENSDART00000124682	j	glb1	NM_001017547.1
cldnd1b	ENSDART00000074231	=	cldnd1b	NM_001161597.1
acy3.2	ENSDART00000004233	j	acy3.2	XM_021470953.1
acy3.2	ENSDART00000004233	=	acy3.2	NM_001002347.1
acy3.2	ENSDART00000004233	j	acy3.2	XM_021470972.1
BX323839.1	ENSDART00000140716	j	LOC108190353	XR_002459123.1
BX323839.1	ENSDART00000140716	j	LOC108190353	XR_001799517.2
acy3.1	ENSDART00000052907	=	acy3.1	NM_001145361.1
acy3.1	ENSDART00000052907	j	acy3.1	XM_009294578.2
tacr3l	ENSDART00000003278	=	tacr3l	NM_001256635.1
abca1a	ENSDART00000167514	=	abca1a	NM_001309465.1
abca1a	ENSDART00000167514	j	abca1a	XR_659128.3
slc44a1a	ENSDART00000011725	=	slc44a1a	XM_002660581.6
aptx	ENSDART00000029252	j	aptx	XM_009294522.3
aptx	ENSDART00000029252	j	aptx	XM_009294519.3
aptx	ENSDART00000029252	j	aptx	XM_005160130.4
aptx	ENSDART00000029252	=	aptx	NM_214729.1
osbp	ENSDART00000141530	=	osbp	NM_001145585.1
osbp	ENSDART00000141530	j	osbp	XM_021475468.1
osbp	ENSDART00000141530	j	osbp	XM_017355268.2
osbp	ENSDART00000141530	j	osbp	XM_021475472.1
osbp	ENSDART00000141530	j	osbp	XM_021475469.1
osbp	ENSDART00000141530	j	osbp	XM_009294556.2
osbp	ENSDART00000141530	j	osbp	XM_021475470.1
osbp	ENSDART00000141530	j	osbp	XM_005160140.3
osbp	ENSDART00000141530	j	osbp	XM_021475471.1
osbp	ENSDART00000141530	j	osbp	XM_005160138.3
-	-	u	LOC558721	XM_003197730.5
CABZ01021532.1	ENSDART00000182076	n	LOC108179086	XM_681977.8
-	-	u	LOC100535525	XM_003197732.4
wu:fc75a09	ENSDART00000185420	=	wu:fc75a09	XM_001336813.5
patl1	ENSDART00000100937	=	patl1	NM_001083028.1
smarca5	ENSDART00000123972	=	smarca5	NM_001081629.2
inpp4b	ENSDART00000147683	j	inpp4b	XM_009294651.3
inpp4b	ENSDART00000147683	j	inpp4b	XM_005160151.4
inpp4b	ENSDART00000147683	j	inpp4b	XM_021477366.1
inpp4b	ENSDART00000147683	j	inpp4b	XM_005160153.4
inpp4b	ENSDART00000147683	j	inpp4b	XM_005160152.4
il15	ENSDART00000134222	=	il15	XM_017356564.2
il15	ENSDART00000074196	=	il15	XR_659161.2
znf330	ENSDART00000014232	=	znf330	NM_213373.1
rnf150a	ENSDART00000035713	=	rnf150	NM_001145572.1
tbc1d9	ENSDART00000143909	=	tbc1d9	XM_686942.9
ucp1	ENSDART00000038807	=	ucp1	NM_199523.2
elmod2	ENSDART00000172322	j	elmod2	XM_009294631.2
elmod2	ENSDART00000172322	=	elmod2	XM_009294632.2
elmod2	ENSDART00000172322	=	elmod2	NM_001204132.1
-	-	u	LOC108190370	XR_002459124.1
-	-	u	LOC110439888	XR_002459125.1
zgc:66455	ENSDART00000143349	=	zgc:66455	NM_200530.1
b3gnt2a	ENSDART00000074221	o	b3gnt2a	XM_005160146.4
b3gnt2a	ENSDART00000074221	o	b3gnt2a	XM_005160144.4
b3gnt2a	ENSDART00000074221	o	b3gnt2a	XM_005160145.4
b3gnt2a	ENSDART00000074221	=	b3gnt2a	NM_212840.1
commd1	ENSDART00000162025	j	commd1	NM_001045265.1
commd1	ENSDART00000100788	=	commd1	XM_005160149.4
si:ch211-213b8.4	ENSDART00000141348	c	LOC110439714	XR_002458707.1
si:ch211-213b8.4	ENSDART00000141348	j	LOC110439958	XM_021478023.1
-	-	u	LOC103908636	XM_021477369.1
USP34	ENSDART00000166852	k	usp34	XM_009294698.3
xpo1a	ENSDART00000108906	k	xpo1a	XM_009294702.3
fam161a	ENSDART00000127216	=	fam161a	XM_681520.9
fam161a	ENSDART00000127216	j	fam161a	XM_021477374.1
cct4	ENSDART00000026409	=	cct4	NM_200583.1
pus10	ENSDART00000114689	=	pus10	NM_001111189.1
[truncated: 53,191 more rows]

## Sheet: 4 gffcomp tmap RefSeq as ref
ref_gene_id	ref_id	class_code	qry_gene_id	qry_id
rpl24	NM_173235.3	=	rpl24	ENSDART00000164359
rpl24	NM_173235.3	j	rpl24	ENSDART00000157701
rpl24	NM_173235.3	j	rpl24	ENSDART00000158290
rpl24	NM_173235.3	j	rpl24	ENSDART00000167898
cep97	NM_198371.2	=	cep97	ENSDART00000166393
cep97	XM_009305058.3	j	cep97	ENSDART00000161842
cep97	XM_009305058.3	j	cep97	ENSDART00000170877
cep97	XM_009305058.3	n	cep97	ENSDART00000165461
cep97	XM_009305058.3	c	cep97	ENSDART00000171631
cep97	XM_009305058.3	j	cep97	ENSDART00000169005
nfkbiz	XM_021475912.1	j	nfkbiz	ENSDART00000168451
nfkbiz	XM_021475911.1	=	nfkbiz	ENSDART00000172454
nfkbiz	XM_021475912.1	m	nfkbiz	ENSDART00000172487
nfkbiz	XM_021475912.1	n	nfkbiz	ENSDART00000161190
nfkbiz	XM_021475911.1	p	CU651657.1	ENSDART00000161139
eed	NM_001017766.2	=	eed	ENSDART00000162928
eed	NM_001017766.2	m	eed	ENSDART00000166052
eed	NM_001017766.2	j	eed	ENSDART00000161955
eed	NM_001017766.2	j	eed	ENSDART00000163891
hikeshi	NM_001017577.1	=	hikeshi	ENSDART00000169685
hikeshi	NM_001017577.1	j	hikeshi	ENSDART00000166557
tmem39a	NM_199632.1	j	tmem39a	ENSDART00000171547
tmem39a	NM_199632.1	=	tmem39a	ENSDART00000168091
tmem39a	NM_199632.1	j	tmem39a	ENSDART00000164075
tmem39a	NM_199632.1	j	tmem39a	ENSDART00000170183
tmem39a	NM_199632.1	j	tmem39a	ENSDART00000165693
tmem39a	NM_199632.1	j	tmem39a	ENSDART00000160050
tmem39a	NM_199632.1	j	tmem39a	ENSDART00000169744
tmem39a	NM_199632.1	j	tmem39a	ENSDART00000168660
ildr1a	NM_200393.1	=	ildr1a	ENSDART00000168428
ildr1a	NM_200393.1	j	ildr1a	ENSDART00000171162
ildr1a	NM_200393.1	j	ildr1a	ENSDART00000164034
ildr1a	NM_200393.1	j	ildr1a	ENSDART00000166228
ildr1a	NM_200393.1	j	ildr1a	ENSDART00000161565
ildr1a	NM_200393.1	j	ildr1a	ENSDART00000161352
LOC100332762	XM_021475914.1	j	si:zfos-1011f11.2	ENSDART00000180269
LOC100332762	XM_021475914.1	c	si:zfos-1011f11.2	ENSDART00000168609
si:zfos-1011f11.1	XM_017353526.2	=	gpa33a	ENSDART00000165267
si:zfos-1011f11.1	NM_001115105.2	=	gpa33a	ENSDART00000165650
si:zfos-1011f11.1	XM_017353526.2	m	gpa33a	ENSDART00000164282
si:zfos-1011f11.1	NM_001115105.2	c	gpa33a	ENSDART00000166954
si:zfos-1011f11.1	XM_017353526.2	j	gpa33a	ENSDART00000171963
si:zfos-1011f11.1	XM_017353526.2	n	gpa33a	ENSDART00000167148
zgc:163025	NM_001089558.2	x	FP067451.1	ENSDART00000152494
zgc:163025	NM_001089558.2	=	F7 (1 of many)	ENSDART00000165402
f7	NM_131819.2	=	f7	ENSDART00000013209
f7i	NM_173228.1	=	f7i	ENSDART00000003463
f7i	NM_173228.1	j	f7i	ENSDART00000152301
f7i	NM_173228.1	j	f7i	ENSDART00000152530
f7i	NM_173228.1	j	f7i	ENSDART00000152248
f10	NM_201462.3	=	f10	ENSDART00000124837
prozb	NM_001326520.1	=	prozb	ENSDART00000064061
pcid2	NM_001007381.2	=	pcid2	ENSDART00000018741
pcid2	XM_005168000.4	j	pcid2	ENSDART00000160221
pcid2	XM_005168000.4	j	pcid2	ENSDART00000152573
pcid2	XM_005168000.4	j	pcid2	ENSDART00000152426
pcid2	XM_005168000.4	j	pcid2	ENSDART00000152132
pcid2	XM_005168000.4	m	pcid2	ENSDART00000152200
pcid2	XM_005168000.4	j	pcid2	ENSDART00000152361
cul4a	NM_201027.1	c	cul4a	ENSDART00000152205
cul4a	NM_201027.1	c	cul4a	ENSDART00000160843
adprhl1	NM_001006033.1	o	FO681286.1	ENSDART00000188956
zgc:64072	NM_199702.1	j	lamp1a	ENSDART00000168760
zgc:64072	NM_199702.1	j	lamp1a	ENSDART00000160425
grtp1a	NM_213402.1	=	grtp1a	ENSDART00000164091
grtp1a	NM_213402.1	j	grtp1a	ENSDART00000159237
adprhl1	XM_021473006.1	j	adprhl1	ENSDART00000060968
dcun1d2b	NM_001002156.1	j	dcun1d2b	ENSDART00000060971
tmco3	XM_021475917.1	j	tmco3	ENSDART00000109529
tfdp1b	NM_200776.2	=	tfdp1b	ENSDART00000003317
tfdp1b	XM_009305148.3	c	tfdp1b	ENSDART00000153285
grk1a	NM_001034181.2	=	grk1a	ENSDART00000081743
cenpe	NM_001327759.1	j	cenpe	ENSDART00000092584
cenpe	NM_001327759.1	=	cenpe	ENSDART00000111806
cenpe	NM_001327759.1	j	cenpe	ENSDART00000139438
cenpe	NM_001327759.1	j	cenpe	ENSDART00000148172
cenpe	NM_001327759.1	j	cenpe	ENSDART00000133431
cenpe	XM_005168005.4	c	cenpe	ENSDART00000148261
gas6	NM_199978.1	=	gas6	ENSDART00000010092
pros1	NM_001077323.1	=	pros1	ENSDART00000098627
pros1	NM_001077323.1	j	pros1	ENSDART00000136423
pros1	NM_001077323.1	j	pros1	ENSDART00000141590
rasa3	XM_009305235.3	=	rasa3	ENSDART00000092524
tpp2	XM_005168010.4	=	tpp2	ENSDART00000152173
LOC100149425	XM_021475918.1	c	si:ch73-244f7.3	ENSDART00000152799
zgc:92518	NM_001002361.2	=	zgc:92518	ENSDART00000152684
zgc:92518	NM_001002361.2	j	zgc:92518	ENSDART00000192527
zgc:92518	NM_001002361.2	j	zgc:92518	ENSDART00000152511
ercc5	XM_003197605.5	=	ercc5	ENSDART00000144406
ercc5	XM_003197605.5	j	ercc5	ENSDART00000192494
ercc5	XM_003197605.5	m	ercc5	ENSDART00000136878
ercc5	XM_003197605.5	j	ercc5	ENSDART00000031635
blzf1	NM_001144803.1	=	blzf1	ENSDART00000108579
blzf1	XM_021476915.1	c	blzf1	ENSDART00000146732
blzf1	XM_021476915.1	j	blzf1	ENSDART00000134581
blzf1	XM_021476915.1	c	blzf1	ENSDART00000109415
trmt10c	NM_001007332.2	=	trmt10c	ENSDART00000144606
trmt10c	NM_001007332.2	j	trmt10c	ENSDART00000148162
trmt10c	NM_001007332.2	m	trmt10c	ENSDART00000138032
txnl4b	NM_001290146.1	=	txnl4b	ENSDART00000109083
txnl4b	NM_001037123.3	=	txnl4b	ENSDART00000081945
txnl4b	NM_001037123.3	o	txnl4b	ENSDART00000132385
si:ch73-41e3.7	NM_001145612.1	=	si:ch73-41e3.7	ENSDART00000147610
mrpl16	XM_005168001.4	k	mrpl16	ENSDART00000020327
mrpl16	XM_005168001.4	=	mrpl16	ENSDART00000102421
mrpl16	XM_005168001.4	=	mrpl16	ENSDART00000184473
cenpq	NM_001328008.1	=	mrpl39	ENSDART00000179731
mrpl39	NM_199915.3	j	mrpl39	ENSDART00000060944
cenpq	NM_001328008.1	j	mrpl39	ENSDART00000136011
LOC101885604	XM_005168015.4	=	CU571081.1	ENSDART00000184316
mir155	NR_030099.1	=	dre-mir-155	ENSDART00000116068
mrpl39	NM_199915.3	=	mrpl39	ENSDART00000147633
mrpl39	NM_199915.3	j	mrpl39	ENSDART00000143526
jam2a	NM_001098264.1	c	jam2a	ENSDART00000135944
jam2a	NM_001098264.1	j	jam2a	ENSDART00000166731
jam2a	NM_001098264.1	j	jam2a	ENSDART00000133165
atp5j	XM_005167990.4	=	atp5pf	ENSDART00000134456
atp5j	NM_213307.1	=	atp5pf	ENSDART00000004062
atp5j	XM_017352984.2	=	atp5pf	ENSDART00000147937
atp5j	XM_005167990.4	j	atp5pf	ENSDART00000146351
appa	NM_131564.2	c	appa	ENSDART00000167331
appa	NM_131564.2	j	appa	ENSDART00000172116
appa	NM_131564.2	j	appa	ENSDART00000161223
appa	NM_131564.2	j	appa	ENSDART00000170483
appa	NM_131564.2	j	appa	ENSDART00000166786
appa	NM_131564.2	c	appa	ENSDART00000171019
cyyr1	NM_212882.2	=	cyyr1	ENSDART00000160564
adamts1	XM_021475924.1	j	adamts1	ENSDART00000165894
adamts5	NM_001302231.1	=	adamts5	ENSDART00000161072
gart	NM_131617.1	j	gart	ENSDART00000170884
n6amt1	NM_001002502.1	=	n6amt1	ENSDART00000184660
gart	NM_131617.1	j	gart	ENSDART00000172235
-	-	u	RF00001	ENSDART00000190086
-	-	u	RF00001	ENSDART00000187355
donson	XM_021475897.1	i	CR450787.1	ENSDART00000165762
donson	XM_021475897.1	n	CZQB01066256.1	ENSDART00000194799
donson	XM_021475897.1	j	CZQB01066256.1	ENSDART00000194139
runx1	XM_021475829.1	=	runx1	ENSDART00000130697
mir459	NR_039328.1	=	dre-mir-459	ENSDART00000118322
urp2	NM_001082942.1	=	urp2	ENSDART00000097626
LOC100333907	XM_009305281.3	c	clic6	ENSDART00000166094
LOC100333907	XM_009305281.3	j	clic6	ENSDART00000176787
atp1a1a.4	NM_131689.1	=	atp1a1a.4	ENSDART00000048828
atp1a1a.4	NM_131689.1	j	atp1a1a.4	ENSDART00000141426
atp1a1a.4	NM_131689.1	j	atp1a1a.4	ENSDART00000123205
atp1a1a.1	NM_131686.1	=	atp1a1a.1	ENSDART00000081047
atp1a1a.1	NM_131686.1	j	atp1a1a.1	ENSDART00000137184
atp1a1a.1	NM_131686.1	j	atp1a1a.1	ENSDART00000135994
atp1a1a.1	NM_131686.1	j	atp1a1a.1	ENSDART00000147682
atp1a1a.1	NM_131686.1	j	atp1a1a.1	ENSDART00000136381
atp1a1a.1	NM_131686.1	j	atp1a1a.1	ENSDART00000132968
atp1a1a.2	NM_131687.1	=	atp1a1a.2	ENSDART00000006449
atp1a1a.2	NM_131687.1	m	atp1a1a.2	ENSDART00000144313
atp1a1a.3	NM_131688.1	=	atp1a1a.3	ENSDART00000103850
atp1a1a.5	NM_178099.2	=	atp1a1a.5	ENSDART00000006013
si:ch211-132g1.3	XM_021475925.1	j	si:ch211-132g1.3	ENSDART00000143337
si:ch211-132g1.3	XM_021475925.1	j	si:ch211-132g1.3	ENSDART00000137332
si:ch211-132g1.3	XM_021475931.1	=	si:ch211-132g1.3	ENSDART00000131675
si:ch211-132g1.3	XM_021475925.1	c	si:ch211-132g1.3	ENSDART00000122187
si:ch211-132g1.3	XM_021475925.1	j	si:ch211-132g1.3	ENSDART00000138723
si:ch211-132g1.3	XM_021475925.1	j	si:ch211-132g1.3	ENSDART00000135193
LOC103911757	XM_009305481.2	j	si:ch211-132g1.3	ENSDART00000143790
LOC103911757	XM_009305481.2	j	si:ch211-132g1.3	ENSDART00000165669
LOC103911757	XM_009305481.2	c	si:ch211-132g1.3	ENSDART00000147773
LOC103911757	XM_009305481.2	j	si:ch211-132g1.3	ENSDART00000136696
si:ch211-132g1.6	XM_009305490.2	c	si:ch211-132g1.6	ENSDART00000152442
si:ch211-132g1.6	XM_009305490.2	j	si:ch211-132g1.6	ENSDART00000139418
si:ch211-132g1.4	XM_005168310.4	=	si:ch211-132g1.4	ENSDART00000142874
si:ch211-132g1.1	XM_005168309.3	c	si:ch211-132g1.1	ENSDART00000131463
si:ch211-132g1.7	XM_005168313.4	=	PTGFRN	ENSDART00000110331
slc5a3a	NM_001159837.1	=	slc5a3a	ENSDART00000008332
oxgr1a.1	NM_001040383.1	=	oxgr1a.1	ENSDART00000041936
oxgr1a.3	NM_001145628.1	=	oxgr1a.3	ENSDART00000058878
oxgr1a.2	NM_001145625.1	=	oxgr1a.2	ENSDART00000109983
mbnl2	XM_009305352.3	c	mbnl2	ENSDART00000128187
mbnl2	XM_009305352.3	j	mbnl2	ENSDART00000167050
mbnl2	XM_021475196.1	=	mbnl2	ENSDART00000164488
mbnl2	XM_009305355.3	=	mbnl2	ENSDART00000122626
mbnl2	XM_009305352.3	j	mbnl2	ENSDART00000182153
mbnl2	XM_005168296.4	c	mbnl2	ENSDART00000131714
mbnl2	XM_005168298.4	c	mbnl2	ENSDART00000138396
mbnl2	NM_001161671.1	c	mbnl2	ENSDART00000180074
mbnl2	XM_021475196.1	c	mbnl2	ENSDART00000022019
mbnl2	NM_001161669.1	c	mbnl2	ENSDART00000098059
mbnl2	XM_021475191.1	c	mbnl2	ENSDART00000074923
mbnl2	XM_009305355.3	c	mbnl2	ENSDART00000124534
mbnl2	XM_021475193.1	c	mbnl2	ENSDART00000136680
mbnl2	XM_009305373.3	c	mbnl2	ENSDART00000132126
rap2ab	NM_001145705.1	=	rap2ab	ENSDART00000058877
kpnb3	XM_009305394.2	=	kpnb3	ENSDART00000058876
kpnb3	XM_009305394.2	j	kpnb3	ENSDART00000146095
kpnb3	XM_009305394.2	i	RF01229	ENSDART00000116379
kpnb3	XM_009305394.2	j	kpnb3	ENSDART00000140507
kpnb3	XM_009305394.2	j	kpnb3	ENSDART00000143008
farp1	XM_017355952.2	j	farp1	ENSDART00000143758
farp1	XM_017355952.2	m	farp1	ENSDART00000108919
farp1	XM_017355952.2	j	farp1	ENSDART00000141036
farp1	XM_017355952.2	j	farp1	ENSDART00000143361
farp1	XM_017355952.2	j	farp1	ENSDART00000142944
farp1	XM_017355952.2	j	farp1	ENSDART00000157662
si:ch211-235f1.3	XR_002458712.1	j	si:ch211-235f1.3	ENSDART00000144500
farp1	XM_017355952.2	i	RF00001	ENSDART00000119884
farp1	XM_017355952.2	j	farp1	ENSDART00000183832
ggact.3	XM_005168295.2	=	ggact.3	ENSDART00000103785
ggact.3	XM_005168295.2	c	ggact.3	ENSDART00000190207
ggact.2	NM_001004544.1	j	ggact.3	ENSDART00000152555
ggact.2	NM_001004544.1	=	ggact.2	ENSDART00000055779
ggact.1	NM_001077717.1	=	ggact.1	ENSDART00000103795
gpc6a	XM_021475731.1	x	CU986306.1	ENSDART00000152251
gpc6a	NM_001109719.1	=	gpc6a	ENSDART00000126093
gpc5a	NM_001302236.1	=	gpc5a	ENSDART00000157572
mir92a-1	NR_030045.1	=	dre-mir-92a-1	ENSDART00000165341
mir19b	NR_030016.1	=	dre-mir-19b	ENSDART00000160452
mir20a	NR_030019.1	=	dre-mir-20a	ENSDART00000168824
mir19a	NR_030015.1	=	dre-mir-19a	ENSDART00000164057
mir18a	NR_030012.1	=	dre-mir-18a	ENSDART00000162113
mir17a-1	NR_030009.1	=	dre-mir-17a-1	ENSDART00000165512
-	-	u	CABZ01113467.1	ENSDART00000194988
-	-	u	CABZ01113467.1	ENSDART00000194827
-	-	u	RF00001	ENSDART00000121234
slitrk6	NM_001305553.1	=	slitrk6	ENSDART00000163793
-	-	u	RF00002	ENSDART00000166854
-	-	u	FP009765.1	ENSDART00000166256
-	-	u	FO744838.1	ENSDART00000194519
-	-	u	RF00001	ENSDART00000117908
spry2	XM_005160285.4	=	spry2	ENSDART00000052423
spry2	NM_001003842.2	=	spry2	ENSDART00000189676
ndfip2	NM_213347.1	m	ndfip2	ENSDART00000103724
ndfip2	NM_213347.1	c	ndfip2	ENSDART00000188453
tuba8l2	NM_200691.1	=	tuba8l2	ENSDART00000040204
tuba8l2	NM_200691.1	j	tuba8l2	ENSDART00000122569
stk16	NM_001017630.1	=	stk16	ENSDART00000055047
stk16	NM_001017630.1	j	stk16	ENSDART00000142248
atic	NM_001082796.2	j	atic	ENSDART00000137670
mnx2b	NM_001009887.2	x	atic	ENSDART00000139261
mnx2b	NM_001009887.2	x	atic	ENSDART00000136282
mnx2b	NM_001328358.1	=	mnx2b	ENSDART00000114035
mnx2b	NM_001009887.2	=	mnx2b	ENSDART00000040368
atic	NM_001082796.2	=	atic	ENSDART00000022307
atic	NM_001082796.2	j	atic	ENSDART00000141973
fn1b	XM_009305554.3	=	fn1b	ENSDART00000103755
fn1b	XM_009305554.3	c	fn1b	ENSDART00000160791
fn1b	XM_009305554.3	j	fn1b	ENSDART00000126172
fn1b	XM_009305554.3	m	fn1b	ENSDART00000144185
fn1b	XM_009305554.3	n	fn1b	ENSDART00000103754
cpo	NM_001145629.1	=	cpo	ENSDART00000109756
nrp2a	NM_212965.1	=	nrp2a	ENSDART00000150863
nrp2a	NM_212965.1	j	nrp2a	ENSDART00000166779
pard3ba	NM_001328558.1	=	si:ch1073-345a8.1	ENSDART00000168117
pard3ba	XM_017355767.2	c	si:ch1073-345a8.1	ENSDART00000138891
abcb6a	XM_005160290.4	=	abcb6a	ENSDART00000092324
abcb6a	NM_001145693.1	=	abcb6a	ENSDART00000179970
cnppd1	NM_199928.1	=	cnppd1	ENSDART00000037036
cnppd1	NM_199928.1	m	cnppd1	ENSDART00000144559
cnppd1	NM_199928.1	m	cnppd1	ENSDART00000188295
prkag3a	XM_005160292.4	j	prkag3a	ENSDART00000024358
prkag3a	XM_005160292.4	c	prkag3a	ENSDART00000136060
prkag3a	XM_005160292.4	j	prkag3a	ENSDART00000126468
prkag3a	XM_005160292.4	j	prkag3a	ENSDART00000132675
prkag3a	XM_005160292.4	c	prkag3a	ENSDART00000145809
prkag3a	XM_687502.9	c	prkag3a	ENSDART00000139723
retreg2	NM_001080014.1	=	retreg2	ENSDART00000092277
retreg2	XM_005160291.3	j	retreg2	ENSDART00000140936
retreg2	XM_005160291.3	c	retreg2	ENSDART00000146473
mdh1b	NM_001076761.1	=	mdh1b	ENSDART00000141653
mdh1b	NM_001076761.1	j	mdh1b	ENSDART00000134199
mdh1b	XM_021475844.1	c	mdh1b	ENSDART00000131254
mdh1b	NM_001076761.1	m	mdh1b	ENSDART00000144454
fastkd2	XM_687718.9	c	fastkd2	ENSDART00000145378
fastkd2	XM_687718.9	j	fastkd2	ENSDART00000108816
gtf3c3	NM_001256242.1	=	gtf3c3	ENSDART00000127329
hecw2b	XM_003197612.5	j	LO018629.1	ENSDART00000183870
hecw2b	XM_003197612.5	c	hecw2b	ENSDART00000166620
klf7a	NM_001020643.1	=	klf7a	ENSDART00000109356
klf7a	NM_001020643.1	i	RF00001	ENSDART00000176163
si:ch211-93g23.2	NM_001145627.1	=	si:ch211-93g23.2	ENSDART00000147638
ube2f	XM_005160296.4	=	ube2f	ENSDART00000144641
ube2f	NM_213314.1	=	ube2f	ENSDART00000103701
ube2f	NM_213314.1	j	ube2f	ENSDART00000138919
-	-	u	AL929396.1	ENSDART00000152383
-	-	u	RF00001	ENSDART00000189104
erbb4a	NM_001143751.1	j	erbb4a	ENSDART00000145822
erbb4a	NM_001143751.1	=	erbb4a	ENSDART00000092118
erbb4a	NM_001143751.1	j	erbb4a	ENSDART00000182953
LOC108184914	XM_021475898.1	x	CU928069.1	ENSDART00000133377
-	-	u	CU929161.1	ENSDART00000152187
-	-	u	CABZ01075319.1	ENSDART00000194346
-	-	u	CABZ01075319.1	ENSDART00000194672
-	-	u	RF00026	ENSDART00000167329
si:ch73-383l1.1	XM_021475936.1	=	ERBB4 (1 of many)	ENSDART00000092114
si:ch73-383l1.1	XM_021475936.1	c	ERBB4 (1 of many)	ENSDART00000127426
lancl1	NM_001009891.1	j	lancl1	ENSDART00000123563
lancl1	NM_001009891.1	=	lancl1	ENSDART00000016139
lancl1	NM_001009891.1	m	lancl1	ENSDART00000135112
lancl1	NM_001009891.1	j	lancl1	ENSDART00000132217
mylz3	NM_131619.2	j	mylz3	ENSDART00000148276
mylz3	NM_131619.2	j	mylz3	ENSDART00000147770
mylz3	NM_131619.2	=	mylz3	ENSDART00000015732
mylz3	NM_131619.2	j	mylz3	ENSDART00000145445
pcnp	NM_001326718.1	=	pcnp	ENSDART00000101586
pcnp	NM_001326717.1	=	pcnp	ENSDART00000184465
pcnp	NM_001006035.2	=	pcnp	ENSDART00000054925
pcnp	NM_001326716.1	=	pcnp	ENSDART00000146682
pcnp	XM_021473273.1	n	pcnp	ENSDART00000146238
pcnp	NM_001326719.1	=	pcnp	ENSDART00000140189
pcnp	XM_021473273.1	j	pcnp	ENSDART00000134213
mxa	NM_182942.4	=	mxa	ENSDART00000103588
mxb	NM_001128672.1	=	mxb	ENSDART00000012627
mxb	XM_009305797.3	j	mxb	ENSDART00000009315
mxb	XM_009305797.3	=	mxb	ENSDART00000110696
mxb	XM_009305797.3	j	mxb	ENSDART00000131454
efnb2b	NM_131808.1	j	efnb2b	ENSDART00000134989
efnb2b	NM_131808.1	=	efnb2b	ENSDART00000085203
efnb2b	NM_131808.1	j	efnb2b	ENSDART00000131426
arglu1b	NM_200162.1	=	arglu1b	ENSDART00000013264
arglu1b	NM_200162.1	j	arglu1b	ENSDART00000152542
en1b	NM_001013498.2	=	en1b	ENSDART00000190070
en1b	XM_009305884.3	c	en1b	ENSDART00000163488
-	-	u	BX908756.1	ENSDART00000152199
-	-	u	BX908756.2	ENSDART00000194774
-	-	u	RF00001	ENSDART00000176748
radil	NM_001102569.2	=	radil	ENSDART00000167126
radil	NM_001102569.2	c	radil	ENSDART00000110154
radil	XM_021475346.1	c	radil	ENSDART00000145460
-	-	u	mmd2b	ENSDART00000177068
-	-	u	mmd2b	ENSDART00000147383
wu:fc47e11	NR_120315.1	i	RF00271	ENSDART00000185682
wu:fc47e11	NR_120315.1	i	RF00271	ENSDART00000130915
wu:fc47e11	NR_120315.1	i	RF00271	ENSDART00000180877
si:dkey-79f11.10	XM_001345921.8	=	si:dkey-79f11.10	ENSDART00000146090
si:dkey-79f11.9	XM_009306125.3	j	si:dkey-79f11.9	ENSDART00000139774
si:dkey-79f11.7	XM_009306111.3	j	si:dkey-79f11.8	ENSDART00000138187
si:dkey-79f11.10	XM_021475938.1	i	CR855320.1	ENSDART00000159655
si:dkey-79f11.7	XM_009306111.3	m	si:dkey-79f11.7	ENSDART00000188909
si:dkey-79f11.7	XM_009306111.3	j	si:dkey-79f11.7	ENSDART00000141765
si:dkey-79f11.7	XM_009306111.3	j	si:dkey-79f11.7	ENSDART00000144582
si:dkey-79f11.10	XM_021475938.1	i	CR855320.2	ENSDART00000167552
si:dkey-79f11.5	XM_005170873.4	m	si:dkey-79f11.5	ENSDART00000185901
si:dkey-79f11.5	XM_001345965.6	=	si:dkey-79f11.5	ENSDART00000133098
si:dkey-79f11.10	XM_021475937.1	=	CR855320.3	ENSDART00000177051
si:dkeyp-9d4.2	XM_009306148.3	=	si:dkeyp-9d4.2	ENSDART00000143881
si:dkeyp-9d4.3	XM_009306153.3	j	si:dkeyp-9d4.3	ENSDART00000161938
si:dkeyp-9d4.5	XM_017355957.2	=	SLC5A10	ENSDART00000112160
si:dkeyp-9d4.5	XM_017355957.2	c	SLC5A10	ENSDART00000152192
LOC101882918	XM_009306162.3	=	FAM83G	ENSDART00000091508
LOC101882918	XM_005170874.4	c	FAM83G	ENSDART00000152295
grapb	NM_001030080.2	=	grapb	ENSDART00000136654
cacna1hb	XM_021475941.1	j	cacna1hb	ENSDART00000168631
cacna1hb	XM_021475941.1	j	cacna1hb	ENSDART00000160440
syngr3b	NM_001320491.1	=	syngr3b	ENSDART00000121823
syngr3b	NM_001320491.1	j	syngr3b	ENSDART00000138435
myo15ab	XM_021475899.1	j	myo15ab	ENSDART00000143547
myo15ab	XM_021475899.1	j	myo15ab	ENSDART00000183730
myo15ab	XM_021475899.1	j	myo15ab	ENSDART00000184518
myo15ab	XM_021475899.1	x	AL928835.1	ENSDART00000152547
alkbh5	NM_001077387.1	=	alkbh5	ENSDART00000091683
mief2	NM_001076648.2	j	mief2	ENSDART00000103626
mief2	NM_001076648.2	j	mief2	ENSDART00000121439
mief2	NM_001076648.2	=	mief2	ENSDART00000141283
smcr8b	NM_214802.1	=	smcr8b	ENSDART00000021504
zgc:112980	NM_001013300.2	=	zgc:112980	ENSDART00000054981
zgc:112980	XM_021474480.1	j	zgc:112980	ENSDART00000147640
zgc:112980	XM_021474480.1	n	zgc:112980	ENSDART00000146333
zgc:112980	XM_021474480.1	j	zgc:112980	ENSDART00000135197
zgc:112980	XM_021474480.1	c	zgc:112980	ENSDART00000140398
zgc:112980	XM_021474480.1	j	zgc:112980	ENSDART00000147763
ptcd1	XM_693706.8	=	ptcd1	ENSDART00000114613
-	-	u	AL928650.2	ENSDART00000152162
-	-	u	AL928650.4	ENSDART00000186329
si:ch211-160d14.9	XR_662946.3	k	AL928650.3	ENSDART00000152525
-	-	u	si:ch211-160d14.15	ENSDART00000161791
si:ch211-160d14.6	XM_693747.7	=	SLC29A4 (1 of many)	ENSDART00000152367
LOC101883376	XM_021475944.1	=	AL928650.1	ENSDART00000192130
LOC101883376	XM_021475944.1	k	AL928650.1	ENSDART00000152148
fbxl18	NM_001030245.1	=	fbxl18	ENSDART00000103644
actb1	NM_131031.1	=	actb1	ENSDART00000054987
actb1	NM_131031.1	j	actb1	ENSDART00000133319
actb1	NM_131031.1	j	actb1	ENSDART00000141407
actb1	NM_131031.1	j	actb1	ENSDART00000148067
actb1	NM_131031.1	j	actb1	ENSDART00000138324
actb1	NM_131031.1	m	actb1	ENSDART00000135318
actb1	NM_131031.1	j	actb1	ENSDART00000193041
fscn1b	XM_005170877.4	=	fscn1b	ENSDART00000054989
abcg2b	NM_001039066.1	=	abcg2b	ENSDART00000152153
zgc:77849	NM_199602.2	=	zgc:77849	ENSDART00000025604
zgc:77849	NM_199602.2	j	zgc:77849	ENSDART00000152142
grin2ab	XM_009306215.3	j	grin2ab	ENSDART00000103652
grin2ab	XM_009306215.3	=	grin2ab	ENSDART00000137900
si:ch73-191k20.1	XR_002458723.1	=	CT573178.1	ENSDART00000139699
socs1b	XM_005170845.4	=	socs1b	ENSDART00000136198
socs1b	NM_001252630.1	=	socs1b	ENSDART00000188035
si:ch73-191k20.4	XR_224697.4	=	CU467110.1	ENSDART00000133496
LOC103911865	XR_662955.3	=	si:ch73-191k20.3	ENSDART00000148182
tlr2	XM_005170853.4	=	tlr2	ENSDART00000122568
tlr2	NM_212812.1	=	tlr2	ENSDART00000055006
prkcba	NM_201029.1	=	prkcba	ENSDART00000006211
prkcba	NM_201029.1	j	prkcba	ENSDART00000137211
prkcba	XM_005170844.4	j	BX004779.2	ENSDART00000184194
cacng3a	XM_021475946.1	=	cacng3a	ENSDART00000146303
cacng3a	XM_021475946.1	j	cacng3a	ENSDART00000055023
si:ch211-14k19.8	XM_003197620.4	c	si:ch211-14k19.8	ENSDART00000146642
si:ch211-14k19.8	XM_003197620.4	=	si:ch211-14k19.8	ENSDART00000163624
si:ch211-14k19.8	XM_003197620.4	c	vap	ENSDART00000147833
si:ch211-14k19.8	XM_003197620.4	c	vap	ENSDART00000132910
ndufab1a	NM_001003418.1	j	ndufab1a	ENSDART00000139516
ndufab1a	NM_001003418.1	=	ndufab1a	ENSDART00000081337
palb2	XM_001919731.7	c	palb2	ENSDART00000113013
palb2	XM_001919731.7	c	palb2	ENSDART00000142132
zgc:152698	NM_001079934.1	=	rasd3	ENSDART00000046507
plk1	NM_001003890.3	=	plk1	ENSDART00000081343
plk1	NM_001003890.3	j	plk1	ENSDART00000139877
plk1	NM_001003890.3	j	plk1	ENSDART00000145524
plk1	NM_001003890.3	x	BX004779.1	ENSDART00000152196
plk1	NM_001003890.3	j	plk1	ENSDART00000141104
ern2	XM_001919315.6	=	ern2	ENSDART00000143587
ern2	XM_001919315.6	j	ern2	ENSDART00000192174
-	-	u	RF00026	ENSDART00000118295
chtf18	NM_001110102.3	=	chtf18	ENSDART00000092058
chtf18	NM_001110102.3	c	chtf18	ENSDART00000182771
chtf18	NM_001110102.3	i	chtf18	ENSDART00000143336
gng13a	NM_001166125.2	=	gng13a	ENSDART00000147277
gng13a	NM_001198746.1	=	gng13a	ENSDART00000135219
gng13a	NM_001166125.2	c	gng13a	ENSDART00000190360
si:dkeyp-57d7.4	XM_021475900.1	k	si:dkeyp-57d7.4	ENSDART00000166515
zgc:136472	NM_001040241.1	=	zgc:136472	ENSDART00000055011
ubn1	NM_001105118.1	j	ubn1	ENSDART00000146065
ubn1	NM_001105118.1	=	ubn1	ENSDART00000114876
ubn1	NM_001105118.1	j	ubn1	ENSDART00000132812
ubn1	NM_001105118.1	x	BX323038.1	ENSDART00000142384
uncx4.1	NM_001020780.2	=	uncx4.1	ENSDART00000055009
-	-	u	AL954703.1	ENSDART00000194963
-	-	u	AL954703.1	ENSDART00000194788
micall2b	NM_001312897.1	=	micall2b	ENSDART00000137821
micall2b	NR_132439.1	=	micall2b	ENSDART00000008682
micall2b	NR_132439.1	c	micall2b	ENSDART00000157814
si:ch73-12o23.1	XM_002660364.5	=	si:ch73-12o23.1	ENSDART00000110790
elfn1b	XM_001920348.5	=	elfn1b	ENSDART00000111131
ugt5b5	NR_033478.1	=	ugt5b5	ENSDART00000166601
ugt5b5	NR_033478.1	j	ugt5b5	ENSDART00000164079
ugt5b2	NM_001177499.2	o	ugt5b2	ENSDART00000161164
ugt5b4	NM_001080692.1	=	ugt5b4	ENSDART00000080323
ugt5b4	NM_001080692.1	j	ugt5b4	ENSDART00000127735
ugt5b4	NM_001080692.1	j	ugt5b4	ENSDART00000121490
ugt5b4	NM_001080692.1	j	ugt5b4	ENSDART00000160474
ugt5b4	NM_001080692.1	j	ugt5b3	ENSDART00000126996
ugt5b4	NM_001080692.1	j	ugt5b3	ENSDART00000159411
ugt5b2	NM_001177499.2	k	ugt5b2	ENSDART00000016750
ugt5b2	NM_001177499.2	=	ugt5b2	ENSDART00000123725
ugt5b4	NM_001080692.1	j	ugt5b1	ENSDART00000126877
ugt5b1	NM_001177493.1	=	ugt5b1	ENSDART00000123773
elfn1b	XM_001920348.5	c	elfn1b	ENSDART00000189621
mad1l1	NM_200912.2	=	mad1l1	ENSDART00000147904
mad1l1	NM_200912.2	j	mad1l1	ENSDART00000138592
pmm2	NM_200084.1	=	pmm2	ENSDART00000054848
zgc:56409	NM_200325.1	=	zgc:56409	ENSDART00000138630
zgc:56409	XM_005170851.4	=	zgc:56409	ENSDART00000054843
rgs11	NM_001347835.1	=	rgs11	ENSDART00000135702
rgs11	NR_144689.1	=	rgs11	ENSDART00000054833
tmem8a	NM_001145568.1	=	tmem8a	ENSDART00000138726
pdia2	NM_001320534.1	=	pdia2	ENSDART00000005895
pdia2	NM_001320534.1	m	pdia2	ENSDART00000183003
si:dkeyp-75b4.8	XM_001336292.4	=	si:dkeyp-75b4.8	ENSDART00000132607
LOC101884122	XR_224699.4	j	si:dkeyp-75b4.7	ENSDART00000142906
LOC101884122	XR_224699.4	j	si:dkeyp-75b4.7	ENSDART00000144233
LOC101884122	XR_224699.4	j	si:dkeyp-75b4.7	ENSDART00000136257
si:dkeyp-75b4.9	XM_021475951.1	c	si:dkeyp-75b4.9	ENSDART00000144565
si:dkeyp-75b4.10	XM_002660367.4	=	si:dkeyp-75b4.10	ENSDART00000143719
si:dkeyp-75b4.10	XM_002660367.4	m	si:dkeyp-75b4.10	ENSDART00000110749
trim2b	XM_009306306.3	=	trim2b	ENSDART00000162675
trim2b	XM_009306306.3	j	trim2b	ENSDART00000113551
trim2b	XM_009306306.3	j	trim2b	ENSDART00000190227
rnf175	NM_001328343.1	=	rnf175	ENSDART00000125358
rnf175	NM_200308.3	=	rnf175	ENSDART00000054835
fgb	NM_212774.1	=	fgb	ENSDART00000011701
fgb	NM_212774.1	j	fgb	ENSDART00000134835
fgb	NM_212774.1	j	fgb	ENSDART00000144756
fgb	NM_212774.1	j	fgb	ENSDART00000133465
fgb	NM_212774.1	j	fgb	ENSDART00000139358
LOC100536670	XM_021475954.1	j	fga	ENSDART00000147106
fga	NM_001194989.1	j	fga	ENSDART00000148074
fga	NM_001194989.1	=	fga	ENSDART00000033118
fga	NM_001194989.1	m	fga	ENSDART00000135522
fga	NM_001194989.1	j	fga	ENSDART00000135676
fga	NM_001194989.1	n	fga	ENSDART00000134913
lratb	XM_009306315.3	=	si:ch73-132f6.5	ENSDART00000190194
lratb	XM_009306315.3	j	si:ch73-132f6.5	ENSDART00000168473
lratb	XM_009306315.3	j	si:ch73-132f6.5	ENSDART00000172059
lratb	XM_001921155.5	=	lratb.1	ENSDART00000080576
lratb	XM_009306315.3	j	lratb.1	ENSDART00000181437
lratb.2	NM_001135971.1	=	lratb.2	ENSDART00000152432
rbm46	NM_001080024.2	=	rbm46	ENSDART00000110698
rbm46	NM_001080024.2	c	rbm46	ENSDART00000187740
npy2rl	NM_001327802.1	=	npy2rl	ENSDART00000152424
-	-	u	CR854964.1	ENSDART00000152408
eif3f	NM_001200009.1	=	eif3f	ENSDART00000152562
zgc:77880	NM_200891.1	=	zgc:77880	ENSDART00000043881
tmem55bb	NM_001159921.1	j	pip4p1b	ENSDART00000152779
tmem55bb	NM_001159921.1	=	pip4p1b	ENSDART00000029774
LOC557811	XM_021475962.1	j	FRMD7	ENSDART00000109141
LOC557811	XM_021475962.1	c	FRMD7	ENSDART00000152565
-	-	u	RF00001	ENSDART00000120166
dachb	XM_009305776.3	j	dachb	ENSDART00000132076
dachb	XM_009305776.3	j	dachb	ENSDART00000103535
dachb	NM_152956.2	=	dachb	ENSDART00000046283
tnrc5	NM_001039805.2	=	cnpy3	ENSDART00000040116
trpc5a	NM_001327747.1	=	trpc5a	ENSDART00000186876
trpc5a	NM_001327747.1	=	trpc5a	ENSDART00000179237
trpc5a	NM_001327747.1	=	trpc5a	ENSDART00000040502
trpc5a	XM_009305936.3	j	trpc5a	ENSDART00000131294
trpc5a	NM_001044827.1	=	trpc5a	ENSDART00000140495
trpc5a	NM_001044827.1	j	trpc5a	ENSDART00000139060
zgc:174945	NM_001082892.1	=	zgc:174945	ENSDART00000103550
si:dkey-31e10.1	XM_021475965.1	m	si:dkey-31e10.1	ENSDART00000164541
si:dkey-31e10.1	XM_021475965.1	m	si:dkey-31e10.1	ENSDART00000190904
si:dkey-31e10.1	XM_021475965.1	m	si:dkey-31e10.1	ENSDART00000188958
si:dkey-31e10.1	XM_021475965.1	c	si:dkey-31e10.1	ENSDART00000103548
-	-	u	AL953910.1	ENSDART00000163201
si:dkey-31e10.5	XM_003197623.5	j	si:dkey-31e10.5	ENSDART00000152421
si:dkey-31e10.6p	XM_009306342.3	j	CU915827.1	ENSDART00000152189
zgc:103678	NM_001004662.2	=	zgc:103678	ENSDART00000054879
zgc:103678	NM_001004662.2	j	zgc:103678	ENSDART00000152438
atp1b1b	NM_131671.1	=	atp1b1b	ENSDART00000139387
LOC100334711	XM_002660377.5	j	cnga3b	ENSDART00000027050
LOC100334711	XM_002660377.5	c	cnga3b	ENSDART00000137185
si:ch73-222h13.1	XM_002660374.5	j	si:ch73-222h13.1	ENSDART00000139749
crfb15	NM_001278848.1	=	crfb15	ENSDART00000167452
crfb15	NM_001278848.1	c	crfb15	ENSDART00000162137
dmd	NM_001326687.1	=	dmd	ENSDART00000170290
dmd	NM_131785.2	=	dmd	ENSDART00000009886
dmd	XM_017355864.2	c	dmd	ENSDART00000007013
dmd	XM_021475867.1	j	dmd	ENSDART00000135563
dmd	XR_001799156.2	c	dmd	ENSDART00000138275
dmd	XM_021475867.1	c	dmd	ENSDART00000141052
dmd	XM_021475867.1	j	dmd	ENSDART00000102903
dmd	XM_021475867.1	j	dmd	ENSDART00000148305
dmd	XM_009306076.3	c	dmd	ENSDART00000126518
dmd	XM_021475867.1	i	RF00001	ENSDART00000120239
dmd	XM_021475867.1	j	dmd	ENSDART00000131744
dmd	XM_021475867.1	j	dmd	ENSDART00000144095
dmd	XM_021475867.1	j	dmd	ENSDART00000102923
dmd	XM_021475867.1	i	RF00001	ENSDART00000166570
casc5	XM_001921844.6	c	knl1	ENSDART00000147648
knstrn	NM_001128774.1	=	knstrn	ENSDART00000109858
sdk1b	XM_017355965.2	j	sdk1b	ENSDART00000141238
sdk1b	XM_017355965.2	j	sdk1b	ENSDART00000091205
sdk1b	XM_017355965.2	j	sdk1b	ENSDART00000144164
sdk1b	XM_017355965.2	j	sdk1b	ENSDART00000162060
sdk1b	XM_017355965.2	i	RF00001	ENSDART00000184803
sdk1b	XM_017355965.2	i	RF00001	ENSDART00000188928
si:dkey-26i13.7	XM_001338431.7	c	si:dkey-26i13.7	ENSDART00000140725
si:dkey-26i13.6	XM_003197630.4	c	si:dkey-26i13.6	ENSDART00000136093
si:dkey-26i13.6	XM_003197630.4	c	si:dkey-26i13.6	ENSDART00000158253
si:dkey-26i13.5	XM_001338142.5	c	si:dkey-26i13.5	ENSDART00000131668
si:dkey-26i13.5	XM_001338142.5	c	si:dkey-26i13.5	ENSDART00000188891
si:dkey-26i13.3	XM_017356922.2	o	si:dkey-26i13.3	ENSDART00000134588
si:dkey-26i13.3	XM_017356922.2	c	si:dkey-26i13.3	ENSDART00000163312
si:dkey-26i13.4	XM_001338014.4	c	chst12b	ENSDART00000139755
si:dkey-26i13.4	XM_001338014.4	c	chst12b	ENSDART00000115316
LOC797518	XM_021475901.1	=	BX569798.1	ENSDART00000054787
brat1	NM_001040305.1	=	brat1	ENSDART00000090689
-	-	u	eif3bb	ENSDART00000111041
-	-	u	eif3bb	ENSDART00000134531
-	-	u	eif3bb	ENSDART00000142045
si:dkey-26i13.8	XM_009306505.3	j	si:dkey-26i13.8	ENSDART00000147623
si:dkey-26i13.8	XM_009306505.3	j	si:dkey-26i13.8	ENSDART00000138355
chst12b	XM_009306519.3	n	chst12b	ENSDART00000140329
ttyh3b	NM_001037387.2	=	ttyh3b	ENSDART00000033361
iqce	NM_001287204.1	=	iqce	ENSDART00000163971
iqce	XM_002660380.5	=	iqce	ENSDART00000123431
snx8b	XM_009306530.2	=	snx8b	ENSDART00000166981
snx8b	XM_009306530.2	n	snx8b	ENSDART00000193419
grk4	XM_009306444.2	=	grk4	ENSDART00000159981
grk4	NM_001079986.1	=	grk4	ENSDART00000066638
grk4	XM_009306441.2	c	grk4	ENSDART00000165543
grk4	NM_001079986.1	j	grk4	ENSDART00000170032
tspan5b	NM_001008591.1	=	tspan5b	ENSDART00000103399
slc24a2	NM_001328436.1	=	slc24a2	ENSDART00000080100
slc24a2	XM_017355745.2	c	slc24a2	ENSDART00000145929
slc24a2	XM_017355745.2	j	slc24a2	ENSDART00000132752
-	-	u	si:dkey-58j15.11	ENSDART00000152479
-	-	u	si:dkey-58j15.11	ENSDART00000152634
saraf	NM_001076589.1	=	saraf	ENSDART00000103403
saraf	XM_005159818.4	=	saraf	ENSDART00000137697
pla2g12a	NM_001082799.1	=	pla2g12a	ENSDART00000103406
pla2g12a	NM_001082799.1	j	pla2g12a	ENSDART00000143628
LOC110439783	XM_021475996.1	=	si:dkey-58j15.10	ENSDART00000152392
xpa	NM_200471.1	j	xpa	ENSDART00000055566
xpa	XM_009306421.3	c	xpa	ENSDART00000140116
mtp	NM_212970.1	c	mttp	ENSDART00000079930
mtp	NM_212970.1	=	mttp	ENSDART00000015251
mtp	NM_212970.1	j	mttp	ENSDART00000164817
spink4	NM_001327899.1	=	spink4	ENSDART00000126020
b4galt1	NM_001017730.1	j	b4galt1	ENSDART00000162146
b4galt1	NM_001017730.1	j	b4galt1	ENSDART00000166429
stra6l	XM_005159799.4	m	stra6l	ENSDART00000132560
stra6l	XM_005159799.4	j	stra6l	ENSDART00000146842
stra6l	NM_001089448.1	=	stra6l	ENSDART00000142081
stra6l	XM_005159799.4	j	stra6l	ENSDART00000090380
stra6l	XM_005159799.4	j	stra6l	ENSDART00000136188
stra6l	XM_005159799.4	j	stra6l	ENSDART00000141894
tdrd7a	NM_001099343.1	=	tdrd7a	ENSDART00000040307
tdrd7a	NM_001099343.1	j	tdrd7a	ENSDART00000143839
tmod1	XM_001920567.5	c	tmod1	ENSDART00000111485
cplx2l	XM_021471102.1	=	cplx2l	ENSDART00000142122
cplx2l	NM_001002459.2	j	cplx2l	ENSDART00000137463
cplx2l	NM_001002459.2	j	cplx2l	ENSDART00000139336
cplx2l	NM_001002459.2	=	cplx2l	ENSDART00000003825
gne	NM_200883.1	=	gne	ENSDART00000158595
gne	NM_200883.1	j	gne	ENSDART00000165733
gne	NM_200883.1	j	gne	ENSDART00000164045
gne	NM_200883.1	m	gne	ENSDART00000168776
nansa	NM_206829.1	=	nansa	ENSDART00000067086
clta	XM_005159806.3	=	clta	ENSDART00000144920
clta	NM_213045.1	=	clta	ENSDART00000067082
clta	XM_005159805.3	=	clta	ENSDART00000138759
clta	NM_213045.1	j	clta	ENSDART00000142900
clta	NM_213045.1	j	clta	ENSDART00000136658
clta	NM_213045.1	j	clta	ENSDART00000144475
sclt1	XM_021476006.1	=	sclt1	ENSDART00000146067
sclt1	XM_021476006.1	c	sclt1	ENSDART00000079782
sclt1	XM_021476004.1	c	sclt1	ENSDART00000134708
sclt1	XM_021476006.1	j	sclt1	ENSDART00000144596
zgc:77739	XM_005159803.4	=	zgc:77739	ENSDART00000138622
zgc:77739	XM_005159804.4	j	zgc:77739	ENSDART00000134575
zgc:77739	XM_005159804.4	c	zgc:77739	ENSDART00000136421
zgc:77739	XM_005159804.4	m	zgc:77739	ENSDART00000139440
zgc:77739	XM_005159804.4	c	zgc:77739	ENSDART00000184296
zgc:77739	NM_200896.1	=	zgc:77739	ENSDART00000008127
-	-	u	RF00001	ENSDART00000192154
-	-	u	RF00001	ENSDART00000179648
-	-	u	BX511261.1	ENSDART00000194595
LOC103911926	XR_002458737.1	x	BX511261.1	ENSDART00000194054
LOC103911926	XR_002458737.1	j	CU550719.2	ENSDART00000165050
LOC103911926	XR_002458737.1	x	CU550719.1	ENSDART00000157930
LOC103911926	XR_002458737.1	x	CU550719.1	ENSDART00000170656
LOC103911926	XR_002458737.1	x	CU550719.1	ENSDART00000169150
-	-	u	RF00001	ENSDART00000185452
pcdh10a	XM_009306587.3	c	pcdh10a	ENSDART00000159226
pcdh10a	NM_212571.1	=	pcdh10a	ENSDART00000180121
pcdh10a	XM_009306587.3	=	pcdh10a	ENSDART00000189465
pcdh10a	XM_009306589.3	=	pcdh10a	ENSDART00000165785
pcdh10a	NM_212571.1	c	pcdh10a	ENSDART00000162652
-	-	u	BX323031.2	ENSDART00000172433
-	-	u	BX323031.2	ENSDART00000167315
si:dkeyp-7b3.2	XR_663080.3	j	BX323031.1	ENSDART00000162959
-	-	u	CT009746.1	ENSDART00000159014
si:dkeyp-106c3.2	XM_005159307.3	x	BX323837.1	ENSDART00000166364
si:dkeyp-106c3.2	XM_005159307.3	=	si:dkey-5n7.2	ENSDART00000170314
-	-	u	BX323837.1	ENSDART00000167925
pcdh18a	XM_005159845.4	=	pcdh18a	ENSDART00000127838
pcdh18a	NM_001115058.1	=	pcdh18a	ENSDART00000193663
LOC101886760	XR_002458739.1	x	BX004970.1	ENSDART00000194606
LOC101886760	XR_002458739.1	x	BX004970.1	ENSDART00000194077
LOC101886839	XR_002458741.1	y	BX004970.1	ENSDART00000194013
LOC101886839	XR_663089.3	=	FP236197.1	ENSDART00000194501
LOC101886839	XR_002458741.1	c	FP236197.1	ENSDART00000194796
-	-	u	RF00001	ENSDART00000188563
-	-	u	RF00001	ENSDART00000177504
noctb	XM_021476014.1	=	noctb	ENSDART00000111026
elf2b	NM_199219.2	=	elf2b	ENSDART00000103383
elf2b	XM_005159829.4	j	elf2b	ENSDART00000011414
elf2b	XM_005159828.2	=	elf2b	ENSDART00000191046
hpf1	NM_001005769.1	=	hpf1	ENSDART00000079716
ank2a	XM_021476022.1	j	ank2a	ENSDART00000021693
ank2a	XM_021476022.1	i	RF00026	ENSDART00000120800
camk2d2	NM_001002542.1	=	camk2d2	ENSDART00000040049
camk2d2	XM_009306657.3	=	camk2d2	ENSDART00000044896
cxcl8a	XM_001342570.7	=	cxcl8a	ENSDART00000161996
pde5aa	XM_021476042.1	c	pde5aa	ENSDART00000079359
ppp2r2ca	NM_001037394.1	=	ppp2r2ca	ENSDART00000017679
wfs1a	XM_690160.9	m	wfs1a	ENSDART00000090025
wfs1a	XM_690160.9	i	BX530018.3	ENSDART00000177692
crmp1	NM_001020725.1	=	crmp1	ENSDART00000064468
LOC567498	XM_005159850.4	c	BX530018.1	ENSDART00000046874
fip1l1b	NM_001006042.1	=	fip1l1b	ENSDART00000103346
chic2	NM_201120.1	=	chic2	ENSDART00000030083
LOC553528	NM_001328067.1	=	BX530018.2	ENSDART00000184641
LOC553528	NM_001328068.1	=	BX530018.2	ENSDART00000123895
slc34a2a	NM_131624.1	=	slc34a2a	ENSDART00000024328
rbpja	NM_198878.2	=	rbpja	ENSDART00000005067
stim2a	XM_002660408.6	=	stim2a	ENSDART00000114097
si:dkey-194g4.1	XM_021476058.1	m	si:dkey-194g4.1	ENSDART00000190599
si:dkey-194g4.1	XM_021476058.1	j	si:dkey-194g4.1	ENSDART00000057044
LOC100004921	XM_021475903.1	x	CR847936.7	ENSDART00000184399
LOC100004978	XM_021476125.1	n	CR847936.6	ENSDART00000180678
LOC100329816	XM_021476090.1	x	CR847936.9	ENSDART00000184256
LOC100332745	XM_021476092.1	x	CR847936.4	ENSDART00000193804
LOC110438560	XR_002458758.1	j	CR847936.10	ENSDART00000194034
-	-	u	CR847936.2	ENSDART00000167563
LOC110438560	XR_002458758.1	j	CR847936.10	ENSDART00000194957
LOC108189345	XM_021476082.1	x	CR847936.10	ENSDART00000194461
LOC108189345	XM_021476082.1	x	CR847936.8	ENSDART00000188627
LOC108189376	XR_002458760.1	p	CR847936.3	ENSDART00000177054
LOC100330143	XM_021476061.1	j	CR847936.1	ENSDART00000192194
LOC100330009	XM_021475905.1	j	CU138548.5	ENSDART00000193331
-	-	u	CR847936.5	ENSDART00000179745
LOC100330009	XM_021475905.1	x	CU138548.10	ENSDART00000187273
LOC101886102	XM_017355982.2	i	CU138548.1	ENSDART00000192733
LOC101886102	XM_017355982.2	i	CU138548.8	ENSDART00000188325
LOC101886102	XM_017355982.2	i	CU138548.9	ENSDART00000184805
LOC101886102	XM_017355982.2	i	CU138548.2	ENSDART00000193514
LOC101886102	XM_017355982.2	i	CU138548.3	ENSDART00000175698
LOC101886102	XM_017355982.2	i	CU138548.4	ENSDART00000192228
LOC101886102	XM_017355982.2	i	CU138548.7	ENSDART00000193139
LOC101886102	XM_017355982.2	i	CU138548.6	ENSDART00000187557
pcdh7a	XM_005159857.4	=	pcdh7a	ENSDART00000111475
itln1	NM_001076622.2	j	itln1	ENSDART00000188410
itln1	NM_001076622.2	=	itln1	ENSDART00000121868
itln1	NM_001076622.2	c	itln1	ENSDART00000189206
itln1	NM_001076622.2	c	itln1	ENSDART00000181639
hgsnat	XM_002660409.5	=	hgsnat	ENSDART00000109911
pi4k2b	NM_001045485.2	=	pi4k2b	ENSDART00000033018
dlc1	XM_005159860.3	=	dlc1	ENSDART00000109970
dlc1	XM_017355991.2	j	CR848833.1	ENSDART00000194490
dlc1	XM_017355991.2	j	CR848833.1	ENSDART00000194301
dlc1	XM_017355991.2	j	CR848833.1	ENSDART00000194150
sgcz	XM_017355993.2	=	SGCZ	ENSDART00000177122
tusc3	XM_021474885.1	=	tusc3	ENSDART00000160270
tusc3	XM_021474885.1	j	tusc3	ENSDART00000122503
tusc3	XM_021474885.1	c	tusc3	ENSDART00000054707
tusc3	XM_021474885.1	i	RF00001	ENSDART00000177686
fgf20a	NM_001037103.2	=	fgf20a	ENSDART00000013024
micu3a	XM_021476177.1	j	micu3a	ENSDART00000189245
micu3a	XM_021476177.1	j	micu3a	ENSDART00000113266
micu3a	XM_021476177.1	j	micu3a	ENSDART00000159794
micu3a	XM_021476177.1	p	RF01848	ENSDART00000185436
micu3a	XM_021476177.1	p	RF00012	ENSDART00000189735
LOC794952	XM_021476183.1	c	CT573256.1	ENSDART00000122959
vps37a	NM_199990.1	=	vps37a	ENSDART00000078675
vps37a	NM_199990.1	j	vps37a	ENSDART00000162389
mtmr7b	NM_001030126.1	=	mtmr7b	ENSDART00000169081
mtmr7b	XM_005168352.4	j	mtmr7b	ENSDART00000164949
mtus1b	XM_001919934.7	j	mtus1b	ENSDART00000048855
mtus1b	XM_005168364.4	c	mtus1b	ENSDART00000166317
mtus1b	XM_005168364.4	=	mtus1b	ENSDART00000187067
mtus1b	XM_005168365.4	=	mtus1b	ENSDART00000162164
mtus1b	XM_001919934.7	j	mtus1b	ENSDART00000171166
pcm1	XM_021478719.1	j	pcm1	ENSDART00000149026
pcm1	XM_021478719.1	j	pcm1	ENSDART00000164899
asah1b	NM_200577.1	=	asah1b	ENSDART00000040434
asah1b	NM_200577.1	j	asah1b	ENSDART00000168555
frg1	XM_021474756.1	=	frg1	ENSDART00000178599
frg1	NM_001017793.1	=	frg1	ENSDART00000079001
frg1	NM_001017793.1	j	frg1	ENSDART00000162729
frg1	XM_021474756.1	c	frg1	ENSDART00000159038
frg1	NM_001017793.1	j	frg1	ENSDART00000158166
-	-	u	RF00001	ENSDART00000174777
-	-	u	RF00012	ENSDART00000187712
-	-	u	RF01848	ENSDART00000186718
-	-	u	RF00012	ENSDART00000191450
-	-	u	RF01848	ENSDART00000189761
-	-	u	RF00012	ENSDART00000189694
-	-	u	RF01848	ENSDART00000188478
-	-	u	RF00012	ENSDART00000186149
-	-	u	RF00012	ENSDART00000191513
-	-	u	RF00012	ENSDART00000185464
-	-	u	BX511093.1	ENSDART00000135012
fat1a	NM_212967.2	=	fat1a	ENSDART00000145068
fat1a	XM_021469232.1	i	BX537280.1	ENSDART00000146033
fat1a	XM_005168343.4	c	fat1a	ENSDART00000131333
casp3a	NM_131877.3	j	casp3a	ENSDART00000139702
casp3a	NM_131877.3	j	casp3a	ENSDART00000140076
casp3a	NM_131877.3	=	casp3a	ENSDART00000005593
casp3a	NM_131877.3	j	casp3a	ENSDART00000131927
acsl1a	NM_001031837.1	=	acsl1a	ENSDART00000039917
acsl1a	XM_005168349.4	=	acsl1a	ENSDART00000125125
acsl1a	XM_005168349.4	j	acsl1a	ENSDART00000131293
acsl1a	XM_005168349.4	c	acsl1a	ENSDART00000146946
helt	NM_207065.2	=	helt	ENSDART00000078889
si:ch211-197n1.2	XM_692079.7	c	si:dkey-256e7.5	ENSDART00000043484
si:ch211-197n1.2	XM_692079.7	c	si:dkey-256e7.5	ENSDART00000131559
si:ch211-197n1.2	XM_692079.7	c	si:dkey-256e7.5	ENSDART00000142689
si:ch211-197n1.2	XM_692079.7	j	si:dkey-256e7.5	ENSDART00000136279
slc25a4	NM_214702.1	=	slc25a4	ENSDART00000030665
si:dkey-256e7.8	XM_017355880.2	o	si:dkey-256e7.8	ENSDART00000193160
cfap97	XM_005168338.4	=	cfap97	ENSDART00000146258
cfap97	NM_212778.1	=	cfap97	ENSDART00000181078
ankrd37	NM_001145614.1	=	ankrd37	ENSDART00000103236
ufsp2	NM_198810.1	j	ufsp2	ENSDART00000148322
ufsp2	XM_005168337.4	=	ufsp2	ENSDART00000122670
ufsp2	NM_198810.1	j	ufsp2	ENSDART00000145162
ufsp2	NM_198810.1	j	ufsp2	ENSDART00000078848
si:dkey-256e7.8	XM_017355880.2	j	si:dkey-256e7.8	ENSDART00000133027
pdlim3a	NM_001024376.1	=	pdlim3a	ENSDART00000018238
sorbs2a	XM_017355996.2	j	sorbs2a	ENSDART00000138475
sorbs2a	XM_017355996.2	j	sorbs2a	ENSDART00000041215
sorbs2a	XM_021476202.1	x	CR774194.1	ENSDART00000135263
tlr3	NM_001013269.3	=	tlr3	ENSDART00000013021
cyp4v8	NM_001077602.1	=	cyp4v8	ENSDART00000089480
cyp4v8	NM_001077602.1	j	cyp4v8	ENSDART00000138598
-	-	u	CR391953.1	ENSDART00000194972
-	-	u	CR391953.1	ENSDART00000194184
-	-	u	AL929210.2	ENSDART00000194104
-	-	u	AL929210.2	ENSDART00000194348
-	-	u	AL929210.2	ENSDART00000194199
LOC101885961	XR_002458780.1	j	AL929210.1	ENSDART00000143157
LOC101885961	XR_002458780.1	x	CR392335.1	ENSDART00000188234
LOC101885961	XR_002458780.1	j	AL929210.1	ENSDART00000134641
mtnr1aa	NM_131393.1	=	mtnr1aa	ENSDART00000054674
mtnr1aa	NM_131393.1	j	mtnr1aa	ENSDART00000134561
klhl5	NM_001170942.1	=	klhl5	ENSDART00000089442
si:dkey-192k22.2	XM_001334757.7	c	si:dkey-192k22.2	ENSDART00000142515
fam114a1	NM_001089478.1	=	fam114a1	ENSDART00000082063
fam114a1	XM_009307313.3	c	fam114a1	ENSDART00000147228
fam114a1	XM_009307313.3	j	fam114a1	ENSDART00000131548
klf3	NM_131859.3	=	klf3	ENSDART00000014916
klf3	XM_017356404.2	j	klf3	ENSDART00000139550
tbc1d1	XM_021476243.1	j	tbc1d1	ENSDART00000191493
tbc1d1	XM_021476243.1	j	tbc1d1	ENSDART00000188146
tbc1d1	XM_021476243.1	j	tbc1d1	ENSDART00000193094
tbc1d1	XM_021476251.1	c	tbc1d1	ENSDART00000147645
tbc1d1	XM_021476243.1	c	tbc1d1	ENSDART00000133194
tbc1d1	XM_021476250.1	c	tbc1d1	ENSDART00000147525
tbc1d1	XM_021476253.1	c	tbc1d1	ENSDART00000140981
tbc1d1	XM_021476256.1	c	tbc1d1	ENSDART00000139190
pgm2	NM_212886.1	=	pgm2	ENSDART00000020970
si:dkey-167i21.2	NR_015622.1	=	tmsb5	ENSDART00000142026
si:dkey-167i21.2	NR_015622.1	j	tmsb5	ENSDART00000146769
si:dkey-167i21.2	NR_015622.1	j	tmsb5	ENSDART00000131423
si:dkey-167i21.2	NR_015622.1	m	tmsb5	ENSDART00000145534
si:dkey-167i21.2	NR_015622.1	j	tmsb5	ENSDART00000137171
slc25a51a	NM_200755.1	=	slc25a51a	ENSDART00000078610
zgc:195282	NM_001305559.1	=	zgc:195282	ENSDART00000146410
zgc:195282	NM_001161335.1	=	zgc:195282	ENSDART00000109294
rnf38	XM_690108.8	=	rnf38	ENSDART00000139241
rnf38	XM_021476260.1	j	rnf38	ENSDART00000184180
rnf38	XM_021476260.1	j	rnf38	ENSDART00000193777
limch1a	NM_001145577.1	=	limch1a	ENSDART00000132379
limch1a	XM_021475267.1	j	limch1a	ENSDART00000137940
phox2ba	NM_001145703.1	=	phox2ba	ENSDART00000141795
exosc9	NM_001006077.1	=	exosc9	ENSDART00000002886
exosc9	NM_001006077.1	j	exosc9	ENSDART00000131948
ptpn9b	XM_685567.9	=	ptpn9b	ENSDART00000114514
ptprdb	XM_021475048.1	j	ptprdb	ENSDART00000131579
ptprdb	XM_005168322.4	c	ptprdb	ENSDART00000170680
ptprdb	NM_001166048.1	=	ptprdb	ENSDART00000162949
ptprdb	NM_001098769.2	=	ptprdb	ENSDART00000127145
ptprdb	XM_021475048.1	j	ptprdb	ENSDART00000143663
si:dkeyp-118a3.2	XM_005168372.4	=	si:dkeyp-118a3.2	ENSDART00000129970
tyrp1b	NM_001002749.2	=	tyrp1b	ENSDART00000078594
rbm47	NM_001114686.2	=	rbm47	ENSDART00000135552
rbm47	XM_005168361.4	c	rbm47	ENSDART00000134861
rbm47	XM_005168359.4	j	rbm47	ENSDART00000145224
lap3	NM_001114847.1	=	lap3	ENSDART00000089025
clockb	XM_005168339.4	=	clockb	ENSDART00000133959
clockb	XM_005168339.4	j	clockb	ENSDART00000144403
clockb	NM_178295.2	=	clockb	ENSDART00000012552
clockb	XM_005168339.4	j	clockb	ENSDART00000133758
clockb	XM_005168339.4	j	clockb	ENSDART00000136307
kitb	NM_001143918.1	m	kitb	ENSDART00000181888
kitb	NM_001143918.1	=	kitb	ENSDART00000044030
kitb	NM_001143918.1	j	kitb	ENSDART00000124260
clrn2	NM_001114690.1	=	clrn2	ENSDART00000103091
smc2	NM_199542.2	j	smc2	ENSDART00000135274
si:dkey-245p14.4	NM_001114848.1	=	si:dkey-245p14.4	ENSDART00000103089
smc2	NM_199542.2	=	smc2	ENSDART00000109416
kiaa0368	NM_001162486.1	=	ecpas	ENSDART00000088949
kiaa0368	NM_001162486.1	j	ecpas	ENSDART00000131614
kiaa0368	NM_001162486.1	j	ecpas	ENSDART00000146455
fbxo10	NM_001135257.1	j	fbxo10	ENSDART00000088933
fbxo10	NM_001135257.1	=	fbxo10	ENSDART00000111555
fbxo10	NM_001135257.1	j	fbxo10	ENSDART00000141579
fbxo10	NM_001135257.1	c	fbxo10	ENSDART00000143077
polr1e	NM_001020704.1	j	polr1e	ENSDART00000147274
polr1e	NM_001020704.1	=	polr1e	ENSDART00000054574
polr1e	NM_001020704.1	j	polr1e	ENSDART00000141660
polr1e	NM_001020704.1	m	polr1e	ENSDART00000146688
tmem192	NM_001102393.1	=	tmem192	ENSDART00000054575
apela	NM_001297547.1	j	apela	ENSDART00000129853
apela	NM_001297547.1	=	apela	ENSDART00000148219
LOC100536104	XR_002458781.1	=	BX323590.2	ENSDART00000143303
LOC100536104	XR_002458783.1	=	BX323590.2	ENSDART00000142561
-	-	u	RF00001	ENSDART00000120760
march1	XM_021476281.1	c	march1	ENSDART00000131206
march1	XM_021476277.1	c	march1	ENSDART00000054581
tma16	NM_001177745.1	=	tma16	ENSDART00000005733
tma16	NM_001177745.1	j	tma16	ENSDART00000137496
si:ch211-42i9.8	NM_001145618.1	=	si:ch211-42i9.8	ENSDART00000138276
si:ch211-42i9.8	XM_009307363.3	x	BX323590.3	ENSDART00000152179
zbtb5	XM_021476286.1	=	BX323590.1	ENSDART00000113832
zbtb5	XM_021476286.1	c	BX323590.1	ENSDART00000143559
zbtb5	XM_021476286.1	j	BX323590.1	ENSDART00000180175
grhprb	XM_005168340.4	=	grhprb	ENSDART00000147502
grhprb	NM_205685.2	=	grhprb	ENSDART00000132958
grhprb	NM_205685.2	n	grhprb	ENSDART00000143338
grhprb	NM_205685.2	j	grhprb	ENSDART00000139314
grhprb	NM_205685.2	j	grhprb	ENSDART00000146825
si:dkey-82j4.2	XM_021476288.1	=	UBA6	ENSDART00000111454
si:dkey-82j4.2	XM_021476288.1	j	UBA6	ENSDART00000186107
apbb2b	XM_005168376.4	j	apbb2b	ENSDART00000158344
apbb2b	XM_005168376.4	j	apbb2b	ENSDART00000161573
apbb2b	XM_009307598.3	c	apbb2b	ENSDART00000164661
apbb2b	XM_005168376.4	j	apbb2b	ENSDART00000170396
mettl14	NM_207071.1	=	mettl14	ENSDART00000102993
prss12	XM_001920264.5	j	prss12	ENSDART00000088653
prss12	XM_001920264.5	c	prss12	ENSDART00000140263
ndst3	XM_009307604.3	=	ndst3	ENSDART00000146084
ndst3	XM_009307604.3	j	ndst3	ENSDART00000185931
-	-	u	CR927456.1	ENSDART00000147025
-	-	u	CR927456.1	ENSDART00000134618
ugt8	NM_001044325.1	=	ugt8	ENSDART00000124770
ugt8	NM_001044325.1	x	si:ch211-142c4.1	ENSDART00000132440
spock3	NM_001327987.1	j	spock3	ENSDART00000145418
spock3	NM_001327988.1	=	spock3	ENSDART00000148518
spock3	XM_009307619.3	c	spock3	ENSDART00000139461
spock3	XM_017355108.1	=	spock3	ENSDART00000102969
spock3	XM_009307619.3	=	spock3	ENSDART00000166479
tll1	NM_131010.1	=	tll1	ENSDART00000054472
tll1	NM_131010.1	c	tll1	ENSDART00000182810
cpe	NM_214810.2	j	cpe	ENSDART00000142570
cpe	NM_214810.2	=	cpe	ENSDART00000078271
msmo1	NM_213353.1	=	msmo1	ENSDART00000078277
-	-	u	CT583646.1	ENSDART00000147651
klhl2	XM_021476297.1	=	klhl2	ENSDART00000088545
LOC101882260	XR_224314.3	=	CT583646.2	ENSDART00000136556
-	-	u	BX323083.1	ENSDART00000192082
-	-	u	BX323083.1	ENSDART00000184866
-	-	u	BX323083.1	ENSDART00000181354
-	-	u	BX323083.3	ENSDART00000184750
-	-	u	BX323083.3	ENSDART00000191858
-	-	u	BX323083.3	ENSDART00000190049
-	-	u	BX323083.2	ENSDART00000185299
-	-	u	BX323083.2	ENSDART00000185122
-	-	u	BX323083.2	ENSDART00000187225
-	-	u	BX323083.5	ENSDART00000136206
-	-	u	BX323083.5	ENSDART00000145941
-	-	u	BX323083.5	ENSDART00000133226
si:dkey-253i9.4	XM_021476306.1	c	si:dkey-253i9.4	ENSDART00000087670
si:dkey-253i9.4	XM_021476310.1	c	si:dkey-253i9.4	ENSDART00000188893
si:dkey-253i9.4	XM_021476305.1	j	si:dkey-253i9.4	ENSDART00000141077
si:dkey-253i9.4	XM_021476305.1	j	si:dkey-253i9.4	ENSDART00000146630
si:dkey-253i9.4	XM_021476305.1	j	si:dkey-253i9.4	ENSDART00000146183
npy1r	NM_001102391.1	=	npy1r	ENSDART00000193900
npy1r	XM_005170925.3	=	npy1r	ENSDART00000142109
npy1r	XM_005170925.3	i	RF00001	ENSDART00000120308
med28	NM_001007770.1	=	med28	ENSDART00000054442
med28	NM_001007770.1	j	med28	ENSDART00000145661
tmem144a	NM_001003999.1	=	tmem144a	ENSDART00000054440
tmem144a	NM_001003999.1	j	tmem144a	ENSDART00000145053
gria2a	NM_131894.1	=	gria2a	ENSDART00000102782
gria2a	XM_005170897.3	c	gria2a	ENSDART00000077805
glrba	NM_131781.1	=	glrba	ENSDART00000102790
wdr19	XM_021476315.1	=	wdr19	ENSDART00000131257
wdr19	XM_021476315.1	j	wdr19	ENSDART00000182798
wdr19	XM_021476315.1	j	wdr19	ENSDART00000135905
wdr19	XM_021476315.1	j	wdr19	ENSDART00000193518
wdr19	XM_021476315.1	j	wdr19	ENSDART00000147314
wdr19	XM_021476315.1	j	wdr19	ENSDART00000183873
wdr19	XM_021476315.1	j	wdr19	ENSDART00000183376
ncapd3	NM_200330.1	=	ncapd3	ENSDART00000049572
ncapd3	NM_200330.1	j	ncapd3	ENSDART00000134857
primpol	NM_001037378.1	j	primpol	ENSDART00000147076
primpol	NM_001037378.1	=	primpol	ENSDART00000006147
primpol	NM_001037378.1	j	primpol	ENSDART00000146638
adamtsl7	XM_021476316.1	j	adamtsl7	ENSDART00000148327
zcchc7	NM_001301358.2	=	zcchc7	ENSDART00000129066
zcchc7	XM_009307728.3	i	RF00001	ENSDART00000181218
LOC103908753	XR_658196.3	=	si:ch211-134c9.2	ENSDART00000137138
pax5	NM_131638.1	=	pax5	ENSDART00000132602
pax5	XM_005170923.4	j	pax5	ENSDART00000054395
melk	NM_206888.2	=	melk	ENSDART00000047728
melk	NM_206888.2	m	melk	ENSDART00000169381
frmpd1	XM_005170936.4	c	frmpd1a	ENSDART00000140553
frmpd1	XM_005170936.4	c	frmpd1a	ENSDART00000139937
kdm4c	NM_001083851.1	=	kdm4c	ENSDART00000087729
kdm4c	NM_001083851.1	j	kdm4c	ENSDART00000132090
dnah6	XM_021476325.1	j	dnah6	ENSDART00000141317
dnah6	XM_021476325.1	=	dnah6	ENSDART00000054388
dnah6	XM_021476325.1	j	dnah6	ENSDART00000137429
dnah6	XM_021476325.1	i	RF00001	ENSDART00000174446
si:ch73-380n15.2	XM_021476327.1	j	si:ch73-380n15.2	ENSDART00000176849
si:ch73-380n15.2	XM_021476327.1	c	si:ch73-380n15.2	ENSDART00000127506
chrnb3a	NM_201220.1	=	chrnb3a	ENSDART00000074678
LOC108190615	XM_017356953.2	=	si:dkey-234d14.2	ENSDART00000147193
chrna6	NM_001042684.2	j	chrna6	ENSDART00000190987
chrna6	NM_001042684.2	=	chrna6	ENSDART00000031546
-	-	u	RF00001	ENSDART00000181063
chrnb2a	XM_021476333.1	=	chrnb2a	ENSDART00000187834
chrnb2a	XM_021476333.1	j	chrnb2a	ENSDART00000142524
uchl1	NM_201477.1	=	uchl1	ENSDART00000036797
uchl1	NM_201477.1	j	uchl1	ENSDART00000171830
anxa5b	NM_181757.2	=	anxa5b	ENSDART00000019698
anxa5b	NM_181757.2	j	anxa5b	ENSDART00000161874
anxa5b	NM_181757.2	x	FP245458.1	ENSDART00000160680
fgfbp1b	XM_021476334.1	=	fgfbp1b	ENSDART00000128918
fgfbp2b	XM_005170895.4	=	fgfbp2b	ENSDART00000168171
fgfbp2b	NM_001089526.1	j	fgfbp2b	ENSDART00000076766
zmynd10	NM_200397.1	=	zmynd10	ENSDART00000017413
prom1b	NM_198071.1	=	prom1b	ENSDART00000134719
prom1b	XM_021481233.1	j	prom1b	ENSDART00000158915
prom1b	XM_021481233.1	c	prom1b	ENSDART00000140920
prom1b	XM_021481233.1	c	prom1b	ENSDART00000134831
tapt1b	NM_001123250.1	=	tapt1b	ENSDART00000086867
ldb2b	NM_131315.3	=	ldb2b	ENSDART00000043556
qdprb1	NM_001020698.1	x	BX908795.1	ENSDART00000185307
qdprb1	NM_001020698.1	=	qdprb1	ENSDART00000054386
qdprb1	NM_001020698.1	j	qdprb1	ENSDART00000142288
gtf2e2	NM_212731.1	m	gtf2e2	ENSDART00000193925
gtf2e2	NM_212731.1	j	gtf2e2	ENSDART00000138235
gtf2e2	NM_212731.1	=	gtf2e2	ENSDART00000016488
si:dkey-92j12.6	NM_001303054.1	=	SMIM18	ENSDART00000139412
adgrl3.1	XM_005170940.4	j	adgrl3.1	ENSDART00000146871
adgrl3.1	XM_005170940.4	j	adgrl3.1	ENSDART00000144208
adgrl3.1	XM_684028.9	c	adgrl3.1	ENSDART00000189344
adgrl3.1	XM_005170940.4	j	adgrl3.1	ENSDART00000171848
adgrl3.1	XM_005170940.4	c	adgrl3.1	ENSDART00000190858
adgrl3.1	XM_005170942.4	c	adgrl3.1	ENSDART00000086797
si:dkey-92j12.5	XM_021476353.1	n	si:dkey-92j12.5	ENSDART00000162827
si:dkey-92j12.5	XM_021476353.1	j	si:dkey-92j12.5	ENSDART00000188428
si:dkey-92j12.5	XM_021476353.1	j	si:dkey-92j12.5	ENSDART00000147857
rfc1	NM_001089491.2	=	rfc1	ENSDART00000143948
rfc1	NM_001089491.2	x	CR759875.1	ENSDART00000192774
rfc1	NM_001089491.2	j	rfc1	ENSDART00000146575
rfc1	NM_001089491.2	j	rfc1	ENSDART00000144004
rpl9	NM_001003861.1	=	rfc1	ENSDART00000181658
rpl9	XM_005170907.4	=	rpl9	ENSDART00000054338
rpl9	XM_005170907.4	j	rpl9	ENSDART00000147800
rpl9	XM_005170906.4	=	rpl9	ENSDART00000054340
rpl9	XM_005170907.4	j	rpl9	ENSDART00000130277
rpl9	XM_005170907.4	m	rpl9	ENSDART00000122877
rpl9	XM_005170907.4	j	rpl9	ENSDART00000133195
lias	NM_001110401.1	=	lias	ENSDART00000036448
lias	NM_001110401.1	j	lias	ENSDART00000144792
ugdh	NM_001110402.1	=	ugdh	ENSDART00000013263
ugdh	NM_001110402.1	j	ugdh	ENSDART00000122648
smim14	NM_205602.2	=	smim14	ENSDART00000008201
smim14	NM_205602.2	j	smim14	ENSDART00000137567
smim14	NM_205602.2	j	smim14	ENSDART00000131979
ube2kb	NM_001008611.2	=	ube2kb	ENSDART00000139003
ube2kb	NM_001008611.2	k	ube2kb	ENSDART00000025770
pds5a	XM_005170916.4	j	pds5a	ENSDART00000142840
pds5a	NM_200992.2	=	pds5a	ENSDART00000126785
pds5a	XM_005170916.4	j	pds5a	ENSDART00000159138
pds5a	XM_005170916.4	j	pds5a	ENSDART00000137145
pds5a	XM_005170916.4	n	pds5a	ENSDART00000140078
pds5a	XM_005170916.4	c	pds5a	ENSDART00000143014
n4bp2	NM_001079967.1	m	n4bp2	ENSDART00000187503
n4bp2	NM_001079967.1	=	n4bp2	ENSDART00000087658
n4bp2	NM_001079967.1	j	n4bp2	ENSDART00000134113
rhoh	NM_001327973.1	c	rhoh	ENSDART00000102646
chrna9	XM_021476367.1	m	chrna9	ENSDART00000189921
chrna9	XM_021476367.1	m	chrna9	ENSDART00000140706
si:dkeyp-26a9.2	XM_021475907.1	k	si:dkeyp-26a9.2	ENSDART00000134576
si:dkeyp-26a9.2	XM_021475907.1	j	si:dkeyp-26a9.2	ENSDART00000139557
si:dkeyp-26a9.2	XM_021475907.1	j	si:dkeyp-26a9.2	ENSDART00000142928
fam184b	NM_001201530.1	=	fam184b	ENSDART00000145942
ncapg	NM_001256205.1	=	ncapg	ENSDART00000133659
ncapg	NM_001256205.1	j	ncapg	ENSDART00000187824
ncapg	NM_001256205.1	j	ncapg	ENSDART00000142879
lcorl	XM_021476381.1	j	lcorl	ENSDART00000138852
lcorl	XM_021476386.1	=	lcorl	ENSDART00000134860
lcorl	XM_021476381.1	=	lcorl	ENSDART00000155184
lcorl	XM_021476381.1	c	lcorl	ENSDART00000102600
LOC108190619	XR_002458828.1	=	si:dkeyp-26a9.7	ENSDART00000143588
LOC108190619	XR_002458828.1	j	si:dkeyp-26a9.7	ENSDART00000144348
LOC108190619	XR_002458828.1	j	si:dkeyp-26a9.7	ENSDART00000142641
-	-	u	RF00001	ENSDART00000189894
slit2	NM_131735.1	=	slit2	ENSDART00000007531
slit2	XM_021475862.1	j	slit2	ENSDART00000183029
slit2	XM_021475862.1	j	slit2	ENSDART00000171951
slit2	XM_021475862.1	j	slit2	ENSDART00000187183
slit2	XM_021475862.1	j	slit2	ENSDART00000188521
mir218a-2	NR_030122.1	=	dre-mir-218a-2	ENSDART00000118841
im:7138144	XM_002660442.6	=	lrba	ENSDART00000177989
im:7138144	XM_009291242.3	j	lrba	ENSDART00000146960
mab21l2	NM_152975.2	=	mab21l2	ENSDART00000014608
im:7138144	XM_017356061.2	i	RF00001	ENSDART00000158680
im:7138144	XM_009291242.3	c	lrba	ENSDART00000142740
LOC103908771	XR_002458850.1	j	BX005068.1	ENSDART00000142281
im:7138144	XM_002660442.6	i	BX005068.1	ENSDART00000139364
rps3a	NM_200059.2	=	rps3a	ENSDART00000051763
rps3a	NM_200059.2	m	rps3a	ENSDART00000137066
rps3a	NM_200059.2	m	rps3a	ENSDART00000143428
-	-	u	pimr178	ENSDART00000169389
-	-	u	pimr178	ENSDART00000139913
zgc:171517	NM_001111173.1	=	zgc:171517	ENSDART00000102542
sh3d19	NM_001020773.2	j	sh3d19	ENSDART00000184421
qdprb2	XM_021476413.1	=	qdprb2	ENSDART00000123789
qdprb2	XM_021476413.1	j	qdprb2	ENSDART00000147363
qdprb2	XM_021476419.1	=	qdprb2	ENSDART00000130356
sh3d19	NM_001020773.2	=	sh3d19	ENSDART00000126950
sh3d19	NM_001020773.2	j	sh3d19	ENSDART00000181286
sh3d19	NM_001020773.2	j	sh3d19	ENSDART00000184987
sh3d19	NM_001020773.2	j	sh3d19	ENSDART00000140197
fam160a1a	XM_009291274.3	=	fam160a1a	ENSDART00000176581
fam160a1a	XM_009291266.3	c	fam160a1a	ENSDART00000163140
gatb	NM_001013446.3	=	gatb	ENSDART00000102522
gatb	NM_001013446.3	j	gatb	ENSDART00000131938
dctpp1	NM_200771.1	=	dctpp1	ENSDART00000076519
-	-	u	RF00001	ENSDART00000186429
fbxw7	XM_005170952.4	=	fbxw7	ENSDART00000148076
fbxw7	XM_005170948.4	j	fbxw7	ENSDART00000132355
fbxw7	XM_005170948.4	i	RF00001	ENSDART00000176684
tmem154	XM_005170905.3	c	tmem154	ENSDART00000144711
tmem154	NM_001130587.1	=	tmem154	ENSDART00000177225
mnd1	NM_001003597.2	=	mnd1	ENSDART00000054265
mnd1	XM_005170917.4	=	mnd1	ENSDART00000141648
tmem131l	XM_688724.8	=	tmem131l	ENSDART00000133208
tmem131l	XM_688724.8	j	tmem131l	ENSDART00000144340
tmem131l	XM_688724.8	j	tmem131l	ENSDART00000145373
trim2a	NM_001014371.1	=	trim2a	ENSDART00000050445
fhdc1	XM_001920021.5	j	fhdc1	ENSDART00000134470
fhdc1	XM_001920021.5	=	fhdc1	ENSDART00000111686
arfip1	NM_213368.1	=	arfip1	ENSDART00000102501
arfip1	XM_005170892.4	=	arfip1	ENSDART00000141892
arfip1	XM_005170893.3	c	arfip1	ENSDART00000134200
arfip1	XM_005170891.4	j	arfip1	ENSDART00000131628
sfrp2	NM_001077384.2	=	sfrp2	ENSDART00000102498
si:dkey-30k22.10	XR_224713.4	=	AL935184.2	ENSDART00000139672
dchs2	XM_021476495.1	j	si:dkey-30k22.7	ENSDART00000135763
plrg1	NM_213440.1	=	plrg1	ENSDART00000054235
fgg	NM_213054.1	=	fgg	ENSDART00000054230
fgg	NM_213054.1	j	fgg	ENSDART00000161703
fgg	NM_213054.1	m	fgg	ENSDART00000109646
fgg	NM_213054.1	j	fgg	ENSDART00000135854
lrata	NM_001204131.2	=	lrata	ENSDART00000054228
LOC110439814	XR_002458896.1	o	AL935184.1	ENSDART00000134609
si:dkey-30k22.5	NM_001201411.1	=	si:dkey-30k22.5	ENSDART00000141020
npy2r	XM_021475887.1	c	npy2r	ENSDART00000140172
map9	NM_001278845.1	=	map9	ENSDART00000133937
map9	NM_001278845.1	c	map9	ENSDART00000191571
gucy1a3	NM_001309529.1	j	gucy1a1	ENSDART00000143822
gucy1a3	NM_001309529.1	=	gucy1a1	ENSDART00000102455
gucy1b3	NM_001251945.2	=	gucy1b1	ENSDART00000129471
gucy1b3	NM_001251945.2	j	gucy1b1	ENSDART00000132082
fabp2	NM_131431.1	=	fabp2	ENSDART00000027973
fabp2	NM_131431.1	j	fabp2	ENSDART00000136984
usp53b	XM_005170957.4	c	CU929073.1	ENSDART00000166974
usp53b	XM_005170957.4	c	usp53b	ENSDART00000145012
usp53b	XM_005170957.4	j	usp53b	ENSDART00000109714
myoz2b	NM_200854.2	=	myoz2b	ENSDART00000136321
myoz2b	XM_005170915.4	=	myoz2b	ENSDART00000146488
myoz2b	XM_005170915.4	j	myoz2b	ENSDART00000145740
synpo2b	XM_017356099.2	j	synpo2b	ENSDART00000193375
synpo2b	XM_017356099.2	=	synpo2b	ENSDART00000137869
synpo2b	XM_017356099.2	j	synpo2b	ENSDART00000134192
si:ch211-145b13.5	XM_003197657.5	=	si:ch211-145b13.5	ENSDART00000054202
si:ch211-145b13.5	XM_003197657.5	x	BX323448.1	ENSDART00000182428
si:ch211-145b13.6	XM_002660467.5	=	si:ch211-145b13.6	ENSDART00000170878
si:ch211-145b13.6	XM_009291602.3	j	si:ch211-145b13.6	ENSDART00000171292
si:ch211-145b13.6	XM_002660467.5	c	si:ch211-145b13.6	ENSDART00000102346
gpank1	NM_001327760.1	=	gpank1	ENSDART00000193593
gpank1	NM_001327761.1	=	gpank1	ENSDART00000172737
gpank1	NM_001327761.1	c	gpank1	ENSDART00000129259
gpank1	NM_001105703.2	=	gpank1	ENSDART00000076120
pdcd4a	XM_005159885.4	=	pdcd4a	ENSDART00000168640
pdcd4a	NM_212988.1	=	pdcd4a	ENSDART00000185348
pdcd4a	XM_005159885.4	j	pdcd4a	ENSDART00000185187
pdcd4a	XM_005159885.4	j	pdcd4a	ENSDART00000171752
mxd4	XM_682878.9	=	mxd4	ENSDART00000059264
ndufb6	NM_200808.1	=	ndufb6	ENSDART00000054205
ndufb6	NM_200808.1	j	ndufb6	ENSDART00000166226
toporsa	NM_001305555.1	=	toporsa	ENSDART00000102379
toporsa	XM_021479283.1	=	toporsa	ENSDART00000127154
mtap	NM_200554.1	=	mtap	ENSDART00000054208
mtap	NM_200554.1	j	mtap	ENSDART00000171989
cdkn2a/b	XM_002660468.5	j	cdkn2a/b	ENSDART00000193973
cdkn2a/b	XM_002660468.5	=	cdkn2a/b	ENSDART00000054209
LOC108190622	XR_001799830.2	=	CT573245.1	ENSDART00000169362
cxxc4	XM_001345382.5	=	cxxc4	ENSDART00000168594
cxxc4	XM_001345382.5	j	cxxc4	ENSDART00000160381
cxxc4	XM_001345382.5	c	cxxc4	ENSDART00000112899
cxxc4	XM_001345382.5	o	cxxc4	ENSDART00000180140
cxxc4	XM_001345382.5	o	cxxc4	ENSDART00000185410
-	-	u	RF00001	ENSDART00000176681
tet2	XM_005159903.4	j	tet2	ENSDART00000190064
tet2	XM_005159903.4	j	tet2	ENSDART00000176380
tet2	XM_005159903.4	=	tet2	ENSDART00000113020
ppa2	XM_005159884.3	j	ppa2	ENSDART00000169642
ppa2	XM_005159884.3	=	ppa2	ENSDART00000160183
ppa2	NM_205662.1	=	ppa2	ENSDART00000023904
ppa2	XM_005159884.3	j	ppa2	ENSDART00000171614
ppa2	XM_005159884.3	m	ppa2	ENSDART00000167489
arhgef38	XM_009291612.3	=	arhgef38	ENSDART00000112263
ints12	NM_001002161.3	o	ints12	ENSDART00000162879
ints12	NM_001002161.3	=	ints12	ENSDART00000125690
g3bp2	NM_001080563.1	=	g3bp2	ENSDART00000046376
g3bp2	XM_021474934.1	c	g3bp2	ENSDART00000180810
uso1	NM_200155.1	m	uso1	ENSDART00000168439
uso1	NM_200155.1	=	uso1	ENSDART00000112329
uso1	XM_009291480.3	c	uso1	ENSDART00000159318
uso1	XM_009291480.3	=	uso1	ENSDART00000011809
uso1	XM_009291483.3	=	uso1	ENSDART00000193833
uso1	NM_200155.1	j	uso1	ENSDART00000159345
uso1	XM_009291483.3	c	uso1	ENSDART00000164430
uso1	NM_200155.1	j	uso1	ENSDART00000169297
LOC108185367	XM_021475888.1	j	si:ch211-202n12.2	ENSDART00000152117
LOC108185367	XM_021475888.1	o	si:ch211-202n12.2	ENSDART00000152260
-	-	u	AL954695.2	ENSDART00000152506
-	-	u	AL954695.1	ENSDART00000152334
-	-	u	AL954695.3	ENSDART00000152138
coro2a	XM_005159876.4	=	coro2a	ENSDART00000011645
coro2a	XM_005159877.4	j	coro2a	ENSDART00000152169
coro2a	XM_005159877.4	=	coro2a	ENSDART00000182040
coro2a	XM_005159877.4	c	coro2a	ENSDART00000152643
coro2a	NM_199643.2	=	coro2a	ENSDART00000158193
coro2a	XM_005159877.4	j	coro2a	ENSDART00000152306
anp32b	NM_212603.2	=	anp32b	ENSDART00000102500
anp32b	XM_005159865.4	j	anp32b	ENSDART00000152401
anp32b	XM_005159865.4	j	anp32b	ENSDART00000152141
si:dkey-25o16.2	XM_005159909.4	=	hemgn	ENSDART00000152803
si:dkey-25o16.2	XM_700557.7	=	hemgn	ENSDART00000152144
si:dkey-25o16.2	XM_700557.7	n	hemgn	ENSDART00000152785
si:dkey-25o16.2	XM_700557.7	j	hemgn	ENSDART00000152393
si:dkey-25o16.2	XM_700557.7	m	hemgn	ENSDART00000152617
trmo	NM_001327757.1	=	trmo	ENSDART00000152492
trmo	NM_001037692.2	=	trmo	ENSDART00000054184
si:dkey-25o16.4	XM_690920.7	=	si:dkey-25o16.4	ENSDART00000152299
si:dkey-25o16.4	XM_690920.7	m	si:dkey-25o16.4	ENSDART00000183427
si:dkey-25o16.4	XM_690920.7	m	si:dkey-25o16.4	ENSDART00000180366
si:dkey-25o16.4	XM_690920.7	m	si:dkey-25o16.4	ENSDART00000181997
foxe1	XM_005159910.4	c	foxe1	ENSDART00000152389
foxe1	XM_005159910.4	o	foxe1	ENSDART00000109297
sh3gl2a	NM_201116.1	=	sh3gl2a	ENSDART00000090611
sh3gl2a	NM_201116.1	j	sh3gl2a	ENSDART00000152406
cntln	XM_001922094.6	j	cntln	ENSDART00000192087
cntln	XM_001922094.6	j	cntln	ENSDART00000189111
cntln	XM_001922094.6	j	cntln	ENSDART00000187348
cntln	XM_001922094.6	j	cntln	ENSDART00000187248
cntln	XM_001922094.6	=	cntln	ENSDART00000147414
cntln	XM_001922094.6	j	cntln	ENSDART00000147727
cntln	XM_001922094.6	j	cntln	ENSDART00000134032
bnc2	NM_001327751.1	=	bnc2	ENSDART00000189093
bnc2	XM_017354977.2	=	bnc2	ENSDART00000102322
bnc2	XM_017354977.2	j	bnc2	ENSDART00000184065
bnc2	NM_001327750.1	=	bnc2	ENSDART00000161169
bnc2	XM_017354977.2	j	bnc2	ENSDART00000186790
bnc2	NM_001327752.1	=	bnc2	ENSDART00000128671
bnc2	XM_017354977.2	j	bnc2	ENSDART00000180184
si:ch211-76m11.7	XM_021476622.1	=	si:ch211-127n13.2	ENSDART00000135759
-	-	u	si:dkey-29d5.1	ENSDART00000172192
-	-	u	si:dkey-29d5.1	ENSDART00000169584
LOC108190634	XR_002458944.1	j	si:dkey-29d5.2	ENSDART00000165515
pspc1	NM_001045258.1	=	pspc1	ENSDART00000102335
pspc1	NM_001045258.1	j	pspc1	ENSDART00000160524
dnajb14	NM_001077787.1	=	dnajb14	ENSDART00000102337
dnajb14	NM_001077787.1	j	dnajb14	ENSDART00000165332
sgut1	NM_001007361.1	m	sugt1	ENSDART00000180692
sgut1	NM_001007361.1	=	sugt1	ENSDART00000166819
sgut1	NM_001007361.1	j	sugt1	ENSDART00000164984
sgut1	NM_001007361.1	n	sugt1	ENSDART00000162589
sgut1	NM_001007361.1	j	sugt1	ENSDART00000171868
chst10	XM_005159892.4	m	chst10	ENSDART00000133844
chst10	NM_001003779.1	=	chst10	ENSDART00000047211
chst10	XM_005159892.4	n	chst10	ENSDART00000149420
chst10	XM_005159888.4	=	chst10	ENSDART00000149785
chst10	XM_005159891.4	c	chst10	ENSDART00000149817
chst10	XM_005159892.4	c	chst10	ENSDART00000149479
chst10	XM_005159890.4	=	chst10	ENSDART00000187922
snapc3	NM_201115.2	=	snapc3	ENSDART00000167875
snapc3	NM_201115.2	j	snapc3	ENSDART00000161024
snapc3	NM_201115.2	j	snapc3	ENSDART00000170779
psip1a	NM_001020726.1	=	psip1a	ENSDART00000166989
-	-	u	BX571828.2	ENSDART00000149075
LOC110439709	XM_021475889.1	y	BX571828.1	ENSDART00000149632
si:ch1073-440b2.1	XM_021476636.1	=	si:ch1073-440b2.1	ENSDART00000148175
si:ch1073-440b2.1	XM_021476636.1	j	si:ch1073-440b2.1	ENSDART00000190608
LOC108185504	XM_017355884.2	j	FO907124.1	ENSDART00000191210
ednrba	NM_131197.1	=	ednrba	ENSDART00000121758
-	-	u	BX901881.1	ENSDART00000152694
zgc:172295	XM_005159939.4	c	GK3P	ENSDART00000148522
zgc:172295	NM_001114584.1	=	GK3P	ENSDART00000148536
zgc:172295	XM_009291680.3	j	GK3P	ENSDART00000148674
zgc:172295	XM_009291680.3	j	GK3P	ENSDART00000150127
timmdc1	NM_001017828.1	c	timmdc1	ENSDART00000177588
timmdc1	NM_001017828.1	=	timmdc1	ENSDART00000075502
timmdc1	NM_001017828.1	j	timmdc1	ENSDART00000152589
poglut1	NM_001037434.1	c	poglut1	ENSDART00000152182
poglut1	NM_001037434.1	=	poglut1	ENSDART00000075500
pwp2h	NM_213047.1	=	pwp2h	ENSDART00000110270
pwp2h	NM_213047.1	i	CU469541.1	ENSDART00000152730
pwp2h	NM_213047.1	j	pwp2h	ENSDART00000143863
gpm6ba	NM_203427.2	=	gpm6ba	ENSDART00000019770
gemin8	NM_001007317.1	=	gemin8	ENSDART00000053933
gemin8	XM_005168381.4	j	gemin8	ENSDART00000192615
gemin8	XM_005168381.4	j	gemin8	ENSDART00000148331
gemin8	XM_005168381.4	=	gemin8	ENSDART00000142350
cbsa	NM_001111232.1	j	cbsa	ENSDART00000141522
cbsa	NM_001111232.1	=	cbsa	ENSDART00000053932
cbsa	NM_001111232.1	j	cbsa	ENSDART00000126746
cbsa	NM_001111232.1	c	cbsa	ENSDART00000192015
cryaa	NM_152950.2	=	cryaa	ENSDART00000075539
hsf2bp	XM_021475910.1	j	hsf2bp	ENSDART00000133246
hsf2bp	XM_021475910.1	=	hsf2bp	ENSDART00000075546
hsf2bp	XM_021475910.1	j	hsf2bp	ENSDART00000132877
ankrd10a	NM_200980.1	=	ankrd10a	ENSDART00000053926
ankrd10a	NM_200980.1	c	ankrd10a	ENSDART00000150133
ankrd10a	NM_200980.1	c	ankrd10a	ENSDART00000141441
-	-	u	BX908780.3	ENSDART00000152275
zgc:173948	NM_001109872.2	y	BX908780.5	ENSDART00000152484
-	-	u	BX908780.1	ENSDART00000144085
-	-	u	BX908780.1	ENSDART00000111548
cars2	XM_677640.9	x	BX908780.1	ENSDART00000187742
zgc:173948	NM_001109872.2	=	si:ch211-198k9.6	ENSDART00000114536
zgc:173948	NM_001109872.2	m	si:ch211-198k9.6	ENSDART00000149219
zgc:173948	NM_001109872.2	m	si:ch211-198k9.6	ENSDART00000150004
zgc:173948	NM_001109872.2	c	si:ch211-198k9.6	ENSDART00000186905
cars2	XM_677640.9	=	cars2	ENSDART00000113735
cars2	XM_677640.9	m	cars2	ENSDART00000137055
irs2a	NM_200315.1	=	irs2a	ENSDART00000053924
lig4	NM_001103123.1	=	lig4	ENSDART00000085648
fam155a	XM_001921192.5	=	fam155a	ENSDART00000112106
fam155a	XM_001921192.5	i	BX908780.2	ENSDART00000152716
fam155a	XM_001921192.5	i	BX908780.4	ENSDART00000152176
-	-	u	CT573186.1	ENSDART00000142382
-	-	u	CT573186.2	ENSDART00000152663
-	-	u	CR774189.1	ENSDART00000152343
-	-	u	si:dkey-228l14.1	ENSDART00000152226
si:dkey-1h24.2	NM_001114714.2	=	si:dkey-1h24.2	ENSDART00000109224
si:dkey-1h24.6	XM_001923447.6	=	si:dkey-1h24.6	ENSDART00000132063
raph1b	XM_005159956.4	=	raph1b	ENSDART00000088290
raph1b	XM_005159954.4	j	raph1b	ENSDART00000154342
raph1b	XM_005159954.4	o	raph1b	ENSDART00000136066
spp2	NM_001327983.1	j	spp2	ENSDART00000133225
spp2	NM_001327983.1	=	spp2	ENSDART00000189670
alg11	NM_001161351.1	=	alg11	ENSDART00000049514
alg11	NM_001281826.1	=	alg11	ENSDART00000183571
alg11	NM_001281826.1	c	alg11	ENSDART00000140345
alg11	NM_001161351.1	j	alg11	ENSDART00000136760
cpb2	NM_001020703.2	j	cpb2	ENSDART00000101856
cpb2	NM_001020703.2	=	cpb2	ENSDART00000054059
zc3h13	NM_200522.2	=	zc3h13	ENSDART00000054064
tm9sf2	NM_212728.1	=	tm9sf2	ENSDART00000019743
tm9sf2	NM_212728.1	j	tm9sf2	ENSDART00000135873
zic2b	NM_001001820.1	j	zic2b	ENSDART00000142184
zic2b	NM_001001820.1	=	zic2b	ENSDART00000054066
pcca	NM_001002746.2	=	pcca	ENSDART00000133905
pcca	NM_001002746.2	j	pcca	ENSDART00000136786
pcca	NM_001002746.2	j	pcca	ENSDART00000135252
zgc:153256	NM_001045411.1	=	MARCH4 (1 of many)	ENSDART00000086935
zgc:153256	NM_001045411.1	j	MARCH4 (1 of many)	ENSDART00000143800
vps8	XM_009291904.2	j	vps8	ENSDART00000101779
vps8	NM_001080616.2	=	vps8	ENSDART00000143639
vps8	XM_009291904.2	j	vps8	ENSDART00000134311
vps8	XM_009291904.2	j	vps8	ENSDART00000146783
mir740	NR_030522.1	=	dre-mir-740	ENSDART00000118020
vps8	XM_009291904.2	i	RF00001	ENSDART00000189156
vps8	XM_009291904.2	i	RF00001	ENSDART00000186085
-	-	u	CR382370.1	ENSDART00000152416
si:dkey-22o12.2	NM_001126467.1	=	si:dkey-22o12.2	ENSDART00000125759
tmem41ab	NM_213083.1	=	tmem41ab	ENSDART00000033024
igf2bp2b	XM_021474969.1	o	CR382370.2	ENSDART00000152252
igf2bp2b	XM_005159948.4	=	igf2bp2b	ENSDART00000164202
igf2bp2b	NM_001089374.1	=	igf2bp2b	ENSDART00000185318
igf2bp2b	XM_021474969.1	j	igf2bp2b	ENSDART00000168189
igf2bp2b	XM_005159949.4	=	igf2bp2b	ENSDART00000174868
igf2bp2b	XM_021474969.1	c	igf2bp2b	ENSDART00000157924
igf2bp2b	XM_021474969.1	c	igf2bp2b	ENSDART00000161380
ubac2	NM_001080561.1	m	ubac2	ENSDART00000144297
ubac2	NM_001080561.1	j	ubac2	ENSDART00000164204
gpr183b	NM_001130812.1	=	gpr183b	ENSDART00000112778
dachc	NM_001045236.1	=	dachc	ENSDART00000018827
dachc	NM_001045236.1	j	dachc	ENSDART00000135617
dachc	NM_001045236.1	j	dachc	ENSDART00000124561
si:dkey-15d12.2	NM_001302806.1	=	MZT1	ENSDART00000152175
si:dkey-15d12.2	NM_001302806.1	j	MZT1	ENSDART00000152150
bora	XM_005159946.4	c	bora	ENSDART00000127943
bora	XM_005159947.2	n	bora	ENSDART00000143897
bora	XM_005159947.2	=	bora	ENSDART00000062628
bora	NM_001007450.1	=	bora	ENSDART00000127670
bora	XM_005159947.2	c	bora	ENSDART00000177900
dis3	XM_001336814.8	=	dis3	ENSDART00000085454
dis3	XM_001336814.8	j	dis3	ENSDART00000152279
-	-	u	CR407598.1	ENSDART00000156118
-	-	u	CR407598.2	ENSDART00000154360
-	-	u	BX548015.2	ENSDART00000152541
-	-	u	BX548015.1	ENSDART00000139807
metap1d	NM_001024392.1	=	metap1d	ENSDART00000022841
metap1d	NM_001024392.1	j	metap1d	ENSDART00000149561
dlx2b	NM_131297.2	=	dlx2b	ENSDART00000008469
itga6b	NM_001013448.1	=	itga6b	ENSDART00000102210
itga6b	XM_009291986.3	n	itga6b	ENSDART00000150169
itga6b	XM_009291986.3	c	itga6b	ENSDART00000148968
itga6b	XM_009291986.3	j	itga6b	ENSDART00000148844
si:ch211-269i23.2	XM_009292002.3	j	ppp1r9alb	ENSDART00000132466
si:ch211-269i23.2	XM_009292002.3	j	ppp1r9alb	ENSDART00000138113
eef1a1b	NM_001017795.2	k	eef1a1b	ENSDART00000137863
eef1a1b	NM_001017795.2	=	eef1a1b	ENSDART00000075340
eef1a1b	NM_001017795.2	c	eef1a1b	ENSDART00000129362
kcnq5b	XM_691989.9	=	kcnq5b	ENSDART00000085370
kcnq5b	XM_691989.9	c	kcnq5b	ENSDART00000172243
kcnq5b	XM_691989.9	i	BX284697.1	ENSDART00000148229
kcnq5b	XM_691989.9	j	kcnq5b	ENSDART00000190294
kcnq5b	XM_691989.9	i	BX284697.2	ENSDART00000139915
LOC568486	XM_021476714.1	j	rims1b	ENSDART00000087115
cenpk	NM_001256665.1	=	cenpk	ENSDART00000146567
cenpk	NM_001256665.1	m	cenpk	ENSDART00000134158
cenpk	NM_001256665.1	c	cenpk	ENSDART00000190886
cenpk	NM_001256665.1	j	cenpk	ENSDART00000139828
cenpk	NM_001256665.1	n	cenpk	ENSDART00000146891
-	-	u	CT573247.1	ENSDART00000149401
lbx1b	NM_001163312.1	=	lbx1b	ENSDART00000007770
slc2a15b	NM_001020494.1	=	slc2a15b	ENSDART00000075286
fgf8b	NM_182856.1	=	fgf8b	ENSDART00000057885
fgf8b	NM_182856.1	o	fgf8b	ENSDART00000182908
dpcd	NM_001045377.1	=	dpcd	ENSDART00000085309
dpcd	NM_001045377.1	j	dpcd	ENSDART00000142296
poll	NM_213243.1	=	poll	ENSDART00000057880
poll	NM_213243.1	c	poll	ENSDART00000192203
wbp1lb	NM_001020631.1	=	wbp1lb	ENSDART00000044214
as3mt	NM_001039839.1	=	as3mt	ENSDART00000057879
as3mt	NM_001039839.1	m	as3mt	ENSDART00000144957
cnnm2b	XM_001922770.7	=	cnnm2b	ENSDART00000112333
cnnm2b	XM_009292266.3	j	cnnm2b	ENSDART00000189801
nt5c2b	XM_005168392.4	j	nt5c2b	ENSDART00000152493
nt5c2b	XM_005168392.4	=	nt5c2b	ENSDART00000152232
nt5c2b	NM_001079966.2	=	nt5c2b	ENSDART00000065125
nt5c2b	XM_005168392.4	j	nt5c2b	ENSDART00000152234
inab	NM_131032.2	=	inab	ENSDART00000075260
anos1a	NM_131358.1	=	anos1a	ENSDART00000007522
LOC101885607	XM_009292384.2	n	BX901898.2	ENSDART00000168045
-	-	u	BX901898.1	ENSDART00000152700
sts	XM_005168397.4	=	sts	ENSDART00000146602
sts	XM_005168397.4	j	sts	ENSDART00000148611
sts	XM_005168397.4	j	sts	ENSDART00000181442
pnpla4	NM_001089482.1	j	pnpla4	ENSDART00000112639
pnpla4	NM_001089482.1	=	pnpla4	ENSDART00000101958
LOC101885560	XR_002458703.1	k	CR925879.1	ENSDART00000152552
pudp	NM_001020615.1	=	pudp	ENSDART00000137156
pudp	NM_001020615.1	j	pudp	ENSDART00000135078
-	-	u	RF00001	ENSDART00000178955
nlgn4a	XM_021475240.1	=	nlgn4xa	ENSDART00000113818
nlgn4a	XM_009292174.3	=	nlgn4xa	ENSDART00000152580
nlgn4a	XM_021475240.1	j	nlgn4xa	ENSDART00000128317
-	-	u	RF00001	ENSDART00000125782
LOC562564	XM_009292283.3	c	zgc:174320	ENSDART00000109369
-	-	u	RF00001	ENSDART00000185961
-	-	u	BX322647.1	ENSDART00000135926
-	-	u	BX322647.1	ENSDART00000149792
prkx	XM_685338.6	=	prkx	ENSDART00000136761
mxra5a	XM_001919109.7	c	mxra5a	ENSDART00000140435
mxra5a	XM_005159928.4	=	mxra5a	ENSDART00000113486
mxra5a	XM_001919109.7	c	mxra5a	ENSDART00000137151
gyg2	NM_001145576.1	j	gyg2	ENSDART00000178996
gyg2	NM_001145576.1	=	gyg2	ENSDART00000041191
cd99	NM_001079980.1	j	cd99	ENSDART00000181515
cd99	NM_001079980.1	=	cd99	ENSDART00000136383
cd99	XM_005159924.4	=	cd99	ENSDART00000141347
cd99	XM_005159923.4	=	cd99	ENSDART00000146648
cd99	XM_005159925.4	=	cd99	ENSDART00000136097
cd99	NM_001079980.1	n	cd99	ENSDART00000138633
cd99	NM_001079980.1	m	cd99	ENSDART00000141107
dhrsx	XM_021475978.1	=	dhrsx	ENSDART00000187194
dhrsx	XM_021475978.1	j	dhrsx	ENSDART00000150043
dhrsx	XM_021475978.1	j	dhrsx	ENSDART00000139004
dhrsx	XM_021475978.1	j	dhrsx	ENSDART00000149786
dhrsx	NM_001256719.1	=	dhrsx	ENSDART00000110026
dhrsx	XM_021475978.1	c	dhrsx	ENSDART00000148946
dhrsx	XM_021475978.1	j	dhrsx	ENSDART00000133870
creb1a	NM_200909.1	=	creb1a	ENSDART00000075632
creb1a	NM_200909.1	j	creb1a	ENSDART00000187346
chmp2bb	NM_212904.2	=	chmp2bb	ENSDART00000018472
htr1fb	XM_005159929.4	c	htr1fb	ENSDART00000075626
cldng	NM_180965.4	=	cldng	ENSDART00000015547
cldng	NM_180965.4	c	cldng	ENSDART00000192758
cldng	NM_180965.4	j	cldng	ENSDART00000142111
znf654	XM_003197672.5	=	znf654	ENSDART00000114384
arl13b	NM_173272.1	j	arl13b	ENSDART00000122316
arl13b	NM_173272.1	=	arl13b	ENSDART00000102184
arl13b	NM_173272.1	j	arl13b	ENSDART00000149105
nsun3	NM_001025302.1	=	nsun3	ENSDART00000131664
nsun3	NM_001025302.1	j	nsun3	ENSDART00000141936
-	-	u	RF00001	ENSDART00000174661
-	-	u	RF00001	ENSDART00000175840
epha6	XM_001344524.7	=	epha6	ENSDART00000042984
epha6	XM_005159930.3	=	epha6	ENSDART00000146530
mir734	NR_030517.1	=	dre-mir-734	ENSDART00000117082
epha6	XM_001344524.7	c	epha6	ENSDART00000146042
arl6	XM_021474253.1	=	arl6	ENSDART00000191432
arl6	NM_001008733.1	=	arl6	ENSDART00000046094
arl6	XM_021474253.1	j	arl6	ENSDART00000192938
slc5a7a	XM_021476736.1	j	slc5a7a	ENSDART00000147201
kctd12.2	NM_001034019.2	=	kctd12.2	ENSDART00000075584
-	-	u	si:dkey-24h22.5	ENSDART00000140157
lmo7b	NM_001045444.2	=	lmo7b	ENSDART00000140515
lmo7b	NM_001045444.2	j	lmo7b	ENSDART00000143048
lmo7b	NM_001045444.2	j	lmo7b	ENSDART00000133543
lmo7b	NM_001045444.2	i	RF00001	ENSDART00000180998
lmo7b	NM_001045444.2	j	lmo7b	ENSDART00000083736
lmo7b	NM_001045444.2	j	lmo7b	ENSDART00000132042
klf12a	NM_207062.1	=	klf12a	ENSDART00000012873
klf12a	XM_021475848.1	j	klf12a	ENSDART00000180483
klf5a	XM_001344880.8	=	pibf1	ENSDART00000004361
pibf1	NM_001003575.1	c	pibf1	ENSDART00000157471
pibf1	NM_001003575.1	j	pibf1	ENSDART00000125944
pibf1	NM_001003575.1	=	pibf1	ENSDART00000008277
pibf1	NM_001003575.1	i	RF00001	ENSDART00000178989
pibf1	NM_001003575.1	j	pibf1	ENSDART00000134413
gpalpp1	NM_001003473.1	=	gpalpp1	ENSDART00000037986
gpalpp1	XM_005159916.4	j	gpalpp1	ENSDART00000149891
gpalpp1	XM_005159916.4	=	gpalpp1	ENSDART00000166007
gtf2f2a	NM_001103133.2	=	gtf2f2a	ENSDART00000077744
gtf2f2a	NM_001002127.2	=	gtf2f2a	ENSDART00000102118
gtf2f2a	NM_001002127.2	j	gtf2f2a	ENSDART00000135528
gtf2f2a	NM_001002127.2	n	gtf2f2a	ENSDART00000145535
tpt1	NM_198140.1	x	CR339054.2	ENSDART00000186106
gtf2f2a	NM_001002127.2	n	gtf2f2a	ENSDART00000150038
tpt1	NM_198140.1	=	tpt1	ENSDART00000102111
tpt1	NM_198140.1	j	tpt1	ENSDART00000149038
tpt1	NM_198140.1	j	tpt1	ENSDART00000141569
tpt1	NM_198140.1	j	tpt1	ENSDART00000138240
tpt1	NM_198140.1	i	RF00322	ENSDART00000119932
tpt1	NM_198140.1	j	tpt1	ENSDART00000140387
tpt1	NM_198140.1	i	RF00322	ENSDART00000120701
tpt1	NM_198140.1	j	tpt1	ENSDART00000122137
tpt1	NM_198140.1	i	RF00151	ENSDART00000115565
tpt1	NM_198140.1	i	RF00151	ENSDART00000118605
-	-	u	CR339054.1	ENSDART00000189000
-	-	u	CR339054.1	ENSDART00000149388
-	-	u	si:dkey-151m22.8	ENSDART00000149380
zgc:172122	XM_005159927.4	c	zgc:172122	ENSDART00000077725
zgc:172122	NM_001111204.1	=	zgc:172122	ENSDART00000113808
LOC103910066	XM_017357007.2	j	BX897691.1	ENSDART00000192811
LOC103910066	XM_017357007.2	=	BX897691.1	ENSDART00000167461
sc:d189	NM_001098260.1	=	sc:d189	ENSDART00000165389
-	-	u	CR786582.1	ENSDART00000145950
LOC101883801	XM_005157080.4	j	CR786582.2	ENSDART00000169929
LOC101883801	XM_005157080.4	n	CR786582.2	ENSDART00000165950
LOC101883801	XM_005157080.4	n	CR786582.2	ENSDART00000163284
usp38	XM_003197674.5	=	usp38	ENSDART00000109678
usp38	XM_003197674.5	j	usp38	ENSDART00000181635
usp38	XM_003197674.5	j	usp38	ENSDART00000158799
gab1	NM_001326713.1	=	gab1	ENSDART00000140724
gab1	XM_017353102.2	j	gab1	ENSDART00000149806
gab1	XM_009292494.3	c	gab1	ENSDART00000053806
frem3	NM_001137659.1	=	frem3	ENSDART00000142154
frem3	NM_001137659.1	j	frem3	ENSDART00000140889
si:dkey-27h10.2	XM_001919825.6	=	si:dkey-27h10.2	ENSDART00000176451
si:dkey-27h10.2	XM_005159975.4	j	si:dkey-27h10.2	ENSDART00000133813
si:dkey-27h10.2	XM_005159975.4	j	si:dkey-27h10.2	ENSDART00000136157
si:dkey-27h10.2	XM_005159975.4	c	si:dkey-27h10.2	ENSDART00000145291
hhip	NM_001080012.1	=	hhip	ENSDART00000085051
hhip	NM_001080012.1	j	hhip	ENSDART00000131284
LOC110438575	XM_021476752.1	j	si:ch211-194g2.4	ENSDART00000132118
smad1	XM_005159965.4	j	smad1	ENSDART00000185002
smad1	NM_131356.1	=	smad1	ENSDART00000181541
smad1	XM_005159965.4	j	smad1	ENSDART00000184424
smad1	XM_005159965.4	=	smad1	ENSDART00000033566
tceanc	XM_021476759.1	o	BX276105.1	ENSDART00000180628
mmaa	NM_001105112.1	=	mmaa	ENSDART00000085021
mmaa	NM_001105112.1	m	mmaa	ENSDART00000132932
mmaa	NM_001105112.1	j	mmaa	ENSDART00000140144
mmaa	NM_001105112.1	j	mmaa	ENSDART00000148505
zgc:152968	NM_001327755.1	j	zgc:152968	ENSDART00000179634
zgc:152968	NM_001327755.1	=	zgc:152968	ENSDART00000139636
zgc:152968	NM_001327755.1	c	zgc:152968	ENSDART00000175902
zgc:152968	NM_001327755.1	j	zgc:152968	ENSDART00000137071
znf827	XM_005159979.4	=	znf827	ENSDART00000037516
znf827	XM_005159979.4	c	znf827	ENSDART00000182113
znf827	XM_005159979.4	j	znf827	ENSDART00000182904
-	-	u	RF00001	ENSDART00000189284
lsm6	XM_005159968.4	x	BX324156.1	ENSDART00000187457
lsm6	NM_001002077.2	=	lsm6	ENSDART00000053773
lsm6	XM_005159968.4	=	lsm6	ENSDART00000147458
pou4f2	NM_212807.1	=	pou4f2	ENSDART00000124112
pou4f2	NM_212807.1	e	pou4f2	ENSDART00000189182
-	-	u	si:ch211-163g19.2	ENSDART00000135159
ednraa	XM_021476949.1	j	ednraa	ENSDART00000190784
ednraa	XM_021476949.1	=	ednraa	ENSDART00000187475
ednraa	XM_021476949.1	j	ednraa	ENSDART00000125013
ednraa	XM_021476949.1	j	ednraa	ENSDART00000128557
ednraa	NM_001099445.2	=	ednraa	ENSDART00000010632
ednraa	XM_021476949.1	c	ednraa	ENSDART00000186772
ednraa	XM_021476949.1	c	ednraa	ENSDART00000192274
tmem184c	NM_001145596.1	=	tmem184c	ENSDART00000111566
tmem184c	NM_001145596.1	j	tmem184c	ENSDART00000146020
prmt9	NM_001130767.1	=	prmt9	ENSDART00000053369
prmt9	XM_005159969.4	j	prmt9	ENSDART00000167831
prmt9	XM_005159969.4	c	prmt9	ENSDART00000148386
arhgap10	NM_001045250.1	j	arhgap10	ENSDART00000149022
arhgap10	NM_001045250.1	=	arhgap10	ENSDART00000109314
arhgap10	NM_001045250.1	c	arhgap10	ENSDART00000148640
nr3c2	NM_001100403.1	c	nr3c2	ENSDART00000160637
nr3c2	NM_001100403.1	=	nr3c2	ENSDART00000172111
nr3c2	NM_001100403.1	c	nr3c2	ENSDART00000160056
-	-	u	RF00001	ENSDART00000117485
dclk2a	NM_001145788.1	j	dclk2a	ENSDART00000192580
dclk2a	NM_001145788.1	=	dclk2a	ENSDART00000043855
dclk2a	NM_001145788.1	j	dclk2a	ENSDART00000181666
dclk2a	NM_001145788.1	c	dclk2a	ENSDART00000159684
dclk2a	NM_001145788.1	j	dclk2a	ENSDART00000158395
dclk2a	XR_001798664.2	c	dclk2a	ENSDART00000172742
dclk2a	XR_658585.3	=	dclk2a	ENSDART00000162971
dclk2a	NM_001145789.1	c	dclk2a	ENSDART00000008756
dclk2a	NM_001145787.1	=	dclk2a	ENSDART00000078206
dclk2a	NM_001145789.1	=	dclk2a	ENSDART00000045111
dclk2a	NM_001135121.1	=	dclk2a	ENSDART00000191004
dclk2a	XR_658585.3	c	dclk2a	ENSDART00000157503
dclk2a	NM_001145788.1	j	dclk2a	ENSDART00000169906
dclk2a	NM_001145788.1	j	dclk2a	ENSDART00000171768
fam193a	NM_001328395.1	=	fam193a	ENSDART00000171340
fam193a	NM_001328395.1	c	fam193a	ENSDART00000166797
-	-	u	RF00001	ENSDART00000116159
tnip2	XM_687625.8	=	tnip2	ENSDART00000113542
scpp1	NM_001145240.1	m	scpp1	ENSDART00000193155
scpp1	NM_001145240.1	m	scpp1	ENSDART00000189077
scpp1	NM_001145240.1	m	scpp1	ENSDART00000191887
scpp1	NM_001145240.1	=	scpp1	ENSDART00000127579
sparcl1	NM_001130605.1	=	sparcl1	ENSDART00000083593
sparcl1	NM_001130605.1	j	sparcl1	ENSDART00000168647
sparcl1	XM_021475590.1	=	sparcl1	ENSDART00000191986
sparcl1	NM_001130605.1	j	sparcl1	ENSDART00000171672
LOC101883466	XM_017356255.2	=	si:dkeyp-13d11.1	ENSDART00000144669
LOC101883466	XM_005159994.4	=	si:dkeyp-13d11.1	ENSDART00000140181
si:dkeyp-13d11.2	XM_003197684.5	=	si:dkey-6f10.4	ENSDART00000132318
si:ch211-15e22.3	NM_001145602.1	=	GALNTL6	ENSDART00000189756
si:ch211-15e22.3	XM_005159991.4	j	GALNTL6	ENSDART00000183247
si:ch211-15e22.3	XM_005159991.4	=	GALNTL6	ENSDART00000139448
si:ch211-15e22.3	XM_005159991.4	i	RF00001	ENSDART00000117307
galnt7	XM_005159986.4	=	galnt7	ENSDART00000179352
galnt7	NM_001020641.1	=	galnt7	ENSDART00000079928
galnt7	XM_005159986.4	j	galnt7	ENSDART00000140239
hmgb2a	NM_001037424.1	x	CU462871.1	ENSDART00000192292
galnt7	XM_005159986.4	c	galnt7	ENSDART00000135666
hmgb2a	NM_001037424.1	=	hmgb2a	ENSDART00000047159
hmgb2a	NM_001037424.1	m	hmgb2a	ENSDART00000137451
hmgb2a	NM_001037424.1	j	hmgb2a	ENSDART00000142811
hmgb2a	NM_001037424.1	j	hmgb2a	ENSDART00000142060
hand2	NM_131626.3	=	hand2	ENSDART00000020409
-	-	u	BX000460.1	ENSDART00000194127
-	-	u	BX000460.1	ENSDART00000194782
fbxo8	NM_001040307.1	=	fbxo8	ENSDART00000015323
cep44	NM_001076736.2	j	cep44	ENSDART00000127635
cep44	NM_001076736.2	=	cep44	ENSDART00000075086
hpgd	NM_001326541.1	=	hpgd	ENSDART00000018533
glra3	NM_152965.1	=	glra3	ENSDART00000009777
gpm6ab	XM_005159982.3	=	gpm6ab	ENSDART00000148404
gpm6ab	XM_005159981.4	=	gpm6ab	ENSDART00000128794
gpm6ab	NM_214687.1	=	gpm6ab	ENSDART00000130324
gpm6ab	NM_214687.1	j	gpm6ab	ENSDART00000134996
gpm6ab	NM_214687.1	j	gpm6ab	ENSDART00000133771
[truncated: 58,244 more rows]

## Sheet: 5 tmap output Enx95 v Ens99
ref_gene_id	ref_id	class_code	qry_gene_id	qry_id
[truncated: 59,876 more rows]
