# Supplementary material for: An improved zebrafish transcriptome annotation for sensitive and comprehensive detection of cell type-specific genes
Source: eLife. 2020 Aug 24;9:e55792. doi: 10.7554/eLife.55792 (PMC7486121; doi:10.7554/eLife.55792)
Supplement: Figure 3—source data 1. [file elife-55792-fig3-data1.xlsx]

## Sheet: Sheet1
SRA accession number	stage	Number of paired end reads
SRX107387	dome	63079877
SRX107388	dome	67321325
SRX107389	shield	18208060
SRX107390	shield	21899280
SRX107391	shield	45076415
SRX107392	bud	53100836
SRX107394	28 hpf	53847904
SRX107395	28 hpf	61792155
SRX107396	2 dpf	58401120
SRX107397	2 dpf	65573038
SRX107398	5 dpf	40937043
SRX107399	5 dpf	63873931
Total reads		613110984
