# Supplementary material for: An improved zebrafish transcriptome annotation for sensitive and comprehensive detection of cell type-specific genes
Source: eLife. 2020 Aug 24;9:e55792. doi: 10.7554/eLife.55792 (PMC7486121; doi:10.7554/eLife.55792)
Supplement: Figure 3—source data 2. — Table includes Ens95 gene symbol, gene ID, and spurious transcript ID. Persistence of observed discrepancy in Ens99 is indicated, as is previous status of curation in ZFIN. All of these have been reported to ZFIN. [file elife-55792-fig3-data2.xlsx]

## Sheet: ExamplesForSourceData
correct symbol	Ens95 symbol	Discrepant Ensembl Gene ID	Representative ENSDART with overlap	Fixed in Ens99	Correct gene as standalone Ensembl gene (Ens99)	Curated in ZFIN	ZFIN note
appl1	hesx1	ENSDARG00000060734	ENSDART00000182753	No	No	Yes	listed as appl1 associated with this Ensembl gene ID
cenpq	mrpl39	ENSDARG00000041570	ENSDART00000060944	No	No	No	no cenpq entry in ZFIN
fam171b	march7	ENSDARG00000096271	ENSDART00000151717	No	No	No	no fam171b entry in ZFIN
klf5a	pibf1	ENSDARG00000015506	ENSDART00000157471	No	No	Yes	no associated Ensembl gene ID for klf5a in ZFIN
map3k14b	arf2b	ENSDARG00000056582	ENSDART00000179898	No	No	Yes	no associated Ensembl gene ID for map3k14b in ZFIN
smad9	alg5	ENSDARG00000021938	ENSDART00000087114	Partial fix;alg5 transcript mis-assigned to smad9	Yes	Yes	no associated Ensembl gene ID for smad9 in ZFIN
zdbf2	eef1b2	ENSDARG00000044521	ENSDART00000065373	No	No	Yes	no associated Ensembl gene ID for zdbf2 in ZFIN
abhd10b	tagln3b	ENSDARG00000058394	ENSDART00000131944	No	No	Yes	no associated Ensembl gene ID for abhd10b in ZFIN
