# Supplementary material for: An improved zebrafish transcriptome annotation for sensitive and comprehensive detection of cell type-specific genes
Source: eLife. 2020 Aug 24;9:e55792. doi: 10.7554/eLife.55792 (PMC7486121; doi:10.7554/eLife.55792)
Supplement: Figure 3—source data 3. [file elife-55792-fig3-data3.xlsx]

## Sheet: RefSeqGenes missing from V4.2
RefSeq Gene Abbrev	RefSeq Transcript ID	Is Coding?	Is missing from Ens99?	Add back?	Note
echdc1	NM_001020563.3,NM_001328136.1	Yes		yes
wbp11	NM_205652.1	Yes		no	appears to be sequence duplication
taar10c	NM_001082900.1	Yes		yes	Ens gene also missing
taar12f	NM_001082907.1,NM_001130671.1	Yes		yes	Ens gene also missing
zgc:153137	NM_001045458.1	Yes		yes	Ens gene also missing
zgc:77614	NM_200894.3,XM_009304092.3	Yes		yes	Ens gene also missing
ift122	NM_212890.1	Yes		no	gene split
efna5b	NM_131026.2	Yes		no	gene split; not really missing
psmd2	NM_200546.1	Yes		no	gene split; this piece is small 5' UTR
taar19r	XM_017358098.2	Yes		yes	in Ens as si:ch211-238p8.35
eme2	XM_021470243.1	Yes		yes	missing
sipa1l2	XM_005173028.4,XM_017358859.2,XM_017358860.2	Yes		yes	missing, but appears to be second separate duplicate
wu:fc47e11	NR_120315.1	No		no	non-coding RNA with embedded snoRNAs
LOC100005129	XM_009306976.3	Yes		yes
LOC100005175	XM_009306975.3	Yes		yes
LOC100007007	XM_005167212.4,XM_021478560.1	Yes		yes
LOC100148951	XM_017356410.2	Yes	Yes	yes
LOC100149233	XM_001920481.5	Yes		yes
LOC100334356	XM_021475393.1	Yes	Yes	yes
LOC100534908	XM_017355406.2	Yes	Yes	yes
LOC100534990	XM_003200813.4	Yes		yes
LOC100535857	XM_021475362.1	Yes	Yes	yes
LOC100536144	XM_021470863.1	Yes		yes
LOC100536609	XM_017355568.2	Yes	Yes	yes
LOC100536964	XM_005167210.4,XM_009304109.3	Yes		yes
LOC100537040	XR_222519.3	No	Yes	yes
LOC100537138	XM_017356536.1	Yes	Yes	yes
LOC100537147	XR_223028.3	No	Yes	yes
LOC100537163	XM_021477798.1	Yes	Yes	yes
LOC101882204	XR_663346.3	No		yes
LOC101882242	XR_001798132.2	No		yes
LOC101882525	XR_224214.2	No	Yes	yes
LOC101882730	XM_005168410.2	Yes	Yes	yes
LOC101882990	XM_009298148.3	Yes	Yes	yes
LOC101883005	XM_009294591.2	Yes	Yes	yes
LOC101883052	XR_223061.4	No	Yes	yes
LOC101883451	XM_005170341.4	Yes	Yes	yes
LOC101883873	XR_223764.4	No	Yes	yes
LOC101883999	XM_009295658.3	Yes	Yes	yes
LOC101884250	XM_005173592.4	Yes	Yes	yes
LOC101884510	XR_224981.4	No	Yes	yes
LOC101884541	XM_005159558.1	Yes	Yes	yes
LOC101885047	XR_223911.4	No	Yes	yes
LOC101885494	XM_005171418.4	Yes		yes
LOC101885504	XM_017352729.2	Yes	Yes	yes
LOC101885945	XR_222558.3	No	Yes	yes
LOC101886033	XM_005173840.4	Yes	Yes	yes
LOC101886078	XR_663274.3	No	Yes	yes
LOC101886113	XR_001796384.2	No	Yes	yes
LOC101886954	XM_021475383.1	Yes	Yes	yes
LOC101887025	XR_002458710.1	No	Yes	yes
LOC101887034	XR_002458959.1	No	Yes	yes
LOC103908653	XR_659787.3	No		yes
LOC103908736	XR_660084.2	No	Yes	yes
LOC103908767	XR_658239.2	No	Yes	yes
LOC103909189	XR_658937.2	No	Yes	yes
LOC103909466	XR_659376.2	No	Yes	yes
LOC103909484	XM_021478188.1	Yes	Yes	yes
LOC103909749	XR_659818.2	No	Yes	yes
LOC103909877	XM_009298147.2	Yes	Yes	yes
LOC103909924	XM_017354552.2	Yes		yes
LOC103909926	XM_009298279.3	Yes	Yes	yes
LOC103910403	XR_001798203.2,XR_001798204.2	No		yes
LOC103910588	XR_001798718.2	No	Yes	yes
LOC103910615	XR_002458339.1,XR_002458340.1	No		yes
LOC103910710	XR_002458506.1	No		yes
LOC103910744	XR_661163.1	No	Yes	yes
LOC103910749	XM_017355679.1	Yes	Yes	yes
LOC103910760	XR_002458497.1,XR_661192.3,XR_661193.3,XR_661194.3	No	Yes	yes
LOC103911096	XR_661663.3	No		yes
LOC103911487	XM_017357430.1	Yes	Yes	yes
LOC103911535	XM_009304113.3,XM_009304114.3	Yes		yes
LOC103911828	XR_662895.2	No	Yes	yes
LOC103911992	XR_663181.3	No	Yes	yes
LOC103911993	XR_663182.2	No	Yes	yes
LOC108180110	XR_001796625.2	No	Yes	yes
LOC108180239	XR_001796765.2	No	Yes	yes
LOC108180340	XM_021468546.1	Yes	Yes	yes
LOC108180351	XM_021468704.1	Yes	Yes	yes
LOC108180815	XR_001797094.2	No	Yes	yes
LOC108181107	XM_021469466.1	Yes		yes
LOC108181677	XR_001797670.2	No	Yes	yes
LOC108183851	XR_001798863.2	No	Yes	yes
LOC108183856	XR_001798878.2	No	Yes	yes
LOC108191299	XR_001800252.1	No	Yes	yes
LOC108191590	XM_021479763.1	Yes		yes
LOC108191974	XR_001800842.2,XR_002459900.1	No	Yes	yes
LOC108192150	XR_001800985.2	No		yes
LOC110437898	XM_021466343.1	Yes	Yes	yes
LOC110437924	XM_021466495.1	Yes	Yes	yes
LOC110437960	XR_002455730.1	No	Yes	yes
LOC110437986	XR_002455790.1	No	Yes	yes
LOC110438011	XR_002455872.1	No	Yes	yes
LOC110438419	XM_021470799.1	Yes		yes
LOC110438459	XR_002456783.1	No	Yes	yes
LOC110439395	XM_021475371.1	Yes	Yes	yes
LOC110439402	XM_021475382.1	Yes	Yes	yes
LOC110439503	XR_002458459.1	No	Yes	yes
LOC110439535	XR_002458492.1	No		yes
LOC110439538	XR_002458499.1	No	Yes	yes
LOC110439539	XR_002458501.1	No	Yes	yes
LOC110439543	XR_002458512.1	No	Yes	yes
LOC110439621	XR_002458636.1	No	Yes	yes
LOC110439860	XR_002459032.1	No	Yes	yes
LOC110439931	XR_002459196.1	No	Yes	yes
LOC110439966	XM_021478095.1	Yes		yes
LOC110440203	XR_002459936.1	No		yes
LOC562245	XM_021480939.1	Yes		yes
LOC564660	XM_002662740.1	Yes		yes
LOC569153	XM_009306971.3	Yes		yes
LOC798495	XM_021477093.1,XM_021477094.1	Yes	Yes	yes
LOC798566	XM_021480743.1,XM_021480744.1	Yes		yes
crygm2b	NM_001020783.1	Yes		yes
hbbe1.2	NM_001103130.1	Yes		yes
hbbe1.3	NM_001097585.1,XM_005164334.4	Yes		yes
lgals9l4	NM_001039811.1	Yes		yes
mir2186	NR_030660.1	No	Yes	yes
mir430a-3	NR_034232.1	No		yes
mir430a-6	NR_039281.1	No		yes
mir430a-7	NR_034236.2	No		yes
mir430a-8	NR_039283.1	No		yes
mir430b-1	NR_039081.1	No		yes
mir430b-11	NR_034262.1	No		yes
mir430b-13	NR_034264.1	No		yes
mir430b-14	NR_034265.1	No		yes
mir430b-15	NR_034266.1	No		yes
mir430b-16	NR_034267.1	No		yes
mir430b-18	NR_045252.2	No		yes
mir430b-19	NR_039318.1	No		yes
mir430b-3	NR_034255.1	No		yes
mir430b-6	NR_034257.1	No		yes
mir430b-7	NR_034258.1	No		yes
mir430b-8	NR_034259.1	No		yes
mir430c-5	NR_045239.2	No		yes
mir430c-6	NR_045240.2	No		yes
mir430i-2	NR_034252.1	No		yes
mir430i-3	NR_034253.1	No		yes
ncbp1	XM_005157337.4	Yes	Yes	yes
nek5	XM_005172559.4	Yes	Yes	yes
pimr152	XM_021480746.1	Yes		yes
pimr154	XM_021480728.1	Yes		yes
pimr157	XM_021480738.1	Yes		yes
pimr159	XM_021480936.1	Yes		yes
pimr166	NM_001083574.1	Yes		yes
si:ch211-116o3.6	XR_225113.4	No		yes
si:ch211-198e20.10	XM_021466433.1	Yes		yes
si:dkey-261m9.18	XM_009298190.3	Yes		yes
si:dkey-269i1.3	NM_001327979.1	Yes		yes
si:dkey-26g8.5	NM_001103115.1	Yes		yes
si:dkey-37m8.3	XM_009296524.3	Yes	Yes	yes
si:dkey-46k9.4	XR_002459511.1,XR_002459512.1,XR_002459513.1,XR_002459514.1,XR_002459515.1,XR_002459516.1,XR_002459517.1	No	Yes	yes
si:dkeyp-98a7.7	XM_003201090.5	Yes		yes
si:dkeyp-98a7.8	NM_001160373.2	Yes		yes
vmac	XM_021479704.1	Yes		yes
wu:fa26c03	NM_001105115.1	Yes		yes
zp2.1	NM_001039883.2	Yes		yes
zp2.6	NM_131829.2	Yes		yes
mir430a-10	NR_034239.1	No		yes
mir430a-11	NR_045248.1	No		yes
mir430a-13	NR_034242.1	No		yes
mir430a-14	NR_034243.1	No		yes
mir430a-15	NR_034244.1	No		yes
mir430a-16	NR_034245.1	No		yes
mir430a-17	NR_045250.1	No		yes
mir430c-10	NR_034219.1	No		yes
mir430c-11	NR_034220.1	No		yes
mir430c-12	NR_034221.1	No		yes
mir430c-13	NR_034222.1	No		yes
mir430c-14	NR_034223.1	No		yes
mir430c-15	NR_034224.1	No		yes
mir430c-16	NR_034225.2	No		yes
mir430c-17	NR_039273.1	No		yes
mir430c-18	NR_039274.1	No		yes

## Sheet: Ens99 genes missing from V4.2
Ens99 Gene Abbrev	Ens99 Gene ID	Ens99 biotype	Added to V4.3	Note
wbp11	ENSDARG00000099151	protein_coding	No	appears to be sequence duplication; do not add
si:dkey-58b18.10	ENSDARG00000116868	protein_coding	Yes	better coverage with RefSeq
si:ch211-122l14.4	ENSDARG00000093703	protein_coding	Yes	better transcript coverage with RefSeq
si:ch211-238p8.35	ENSDARG00000112619	protein_coding	Yes	same as taar19r; use RefSeq
AL772241.1	ENSDARG00000103355	sRNA	no
CABZ01005325.1	ENSDARG00000111443	rRNA	no
CR356227.9	ENSDARG00000113973	snRNA	no
CABZ01030259.1	ENSDARG00000114527	rRNA	no
lgals9l4	ENSDARG00000069058	protein_coding	Yes
ctslb	ENSDARG00000074306	protein_coding	Yes
zgc:174154	ENSDARG00000075527	protein_coding	Yes
CABZ01059913.1	ENSDARG00000079154	protein_coding	Yes
BX548160.1	ENSDARG00000080044	rRNA	No
CU326349.1	ENSDARG00000080093	rRNA	No
CR762493.1	ENSDARG00000080170	rRNA	No
CU183074.1	ENSDARG00000080241	rRNA	No
CR388209.1	ENSDARG00000080258	snRNA	No
CU459001.1	ENSDARG00000080319	rRNA	No
CU861888.1	ENSDARG00000080345	rRNA	No
LO017875.1	ENSDARG00000080370	rRNA	No
BX004779.1	ENSDARG00000080404	snRNA	No
FP085395.1	ENSDARG00000080448	snRNA	No
AL928952.1	ENSDARG00000080562	snRNA	No
CR848724.1	ENSDARG00000080664	rRNA	No
BX470190.1	ENSDARG00000080738	rRNA	No
BX936417.1	ENSDARG00000080790	rRNA	No
BX005299.1	ENSDARG00000080933	rRNA	No
BX571803.1	ENSDARG00000080950	rRNA	No
LO018617.1	ENSDARG00000081032	rRNA	No
CU207388.1	ENSDARG00000081078	rRNA	No
CABZ01060030.1	ENSDARG00000081096	rRNA	No
CR847568.1	ENSDARG00000081158	rRNA	No
BX323889.1	ENSDARG00000081192	snRNA	No
AL807827.1	ENSDARG00000081238	rRNA	No
BX649296.1	ENSDARG00000081329	rRNA	No
FO704615.1	ENSDARG00000081340	rRNA	No
BX511108.1	ENSDARG00000081405	rRNA	No
CU462817.1	ENSDARG00000081445	snRNA	No
BX537293.1	ENSDARG00000081470	rRNA	No
BX255944.1	ENSDARG00000081487	rRNA	No
CU463182.1	ENSDARG00000081497	rRNA	No
CR790381.1	ENSDARG00000081613	rRNA	No
CU694364.1	ENSDARG00000081734	rRNA	No
AL935280.1	ENSDARG00000081799	snoRNA	No
BX322654.1	ENSDARG00000081955	rRNA	No
CABZ01055225.1	ENSDARG00000081967	rRNA	No
BX322795.1	ENSDARG00000081971	rRNA	No
CU929365.1	ENSDARG00000082003	rRNA	No
BX530058.1	ENSDARG00000082164	rRNA	No
CR356238.1	ENSDARG00000082166	rRNA	No
CU682811.1	ENSDARG00000082215	rRNA	No
CR847979.1	ENSDARG00000082216	rRNA	No
CR855375.1	ENSDARG00000082245	rRNA	No
BX247907.1	ENSDARG00000082252	rRNA	No
CT027578.1	ENSDARG00000082253	snRNA	No
BX927135.1	ENSDARG00000082273	snRNA	No
BX537142.1	ENSDARG00000082380	snRNA	No
CR354430.1	ENSDARG00000082399	miRNA	Yes
AL645755.1	ENSDARG00000082417	rRNA	No
BX511096.1	ENSDARG00000082480	rRNA	No
CU861666.1	ENSDARG00000082530	rRNA	No
FQ790365.1	ENSDARG00000082581	rRNA	No
CU914142.1	ENSDARG00000082600	rRNA	No
CU469093.1	ENSDARG00000082628	snRNA	No
CABZ01066915.1	ENSDARG00000082654	rRNA	No
CR854881.1	ENSDARG00000082665	rRNA	No
CR848822.1	ENSDARG00000082727	rRNA	No
CR555297.1	ENSDARG00000082746	rRNA	No
BX510991.1	ENSDARG00000082787	rRNA	No
CR391974.1	ENSDARG00000082818	rRNA	No
CR352324.1	ENSDARG00000082857	rRNA	No
CU179658.1	ENSDARG00000082878	rRNA	No
FP102961.1	ENSDARG00000082897	rRNA	No
BX649448.2	ENSDARG00000082901	rRNA	No
FO904868.1	ENSDARG00000082906	rRNA	No
CT963136.1	ENSDARG00000082997	rRNA	No
CABZ01071191.1	ENSDARG00000083050	rRNA	No
CR376850.1	ENSDARG00000083060	snRNA	No
BX842683.1	ENSDARG00000083322	rRNA	No
BX005027.1	ENSDARG00000083391	rRNA	No
CABZ01039859.2	ENSDARG00000083431	snRNA	No
BX908740.1	ENSDARG00000083573	rRNA	No
AL928649.1	ENSDARG00000083580	rRNA	No
CR352297.1	ENSDARG00000083653	rRNA	No
CU138544.1	ENSDARG00000083654	rRNA	No
BX001050.1	ENSDARG00000083664	rRNA	No
CT573356.1	ENSDARG00000083682	rRNA	No
BX537109.1	ENSDARG00000083690	rRNA	No
CR388050.1	ENSDARG00000083708	rRNA	No
CU856136.1	ENSDARG00000083753	rRNA	No
CU467822.1	ENSDARG00000083794	rRNA	No
CR376850.2	ENSDARG00000083816	rRNA	No
CABZ01112464.1	ENSDARG00000083818	rRNA	No
BX936447.1	ENSDARG00000083852	rRNA	No
CABZ01052423.1	ENSDARG00000083857	rRNA	No
BX571820.1	ENSDARG00000083868	rRNA	No
CABZ01021917.1	ENSDARG00000083932	rRNA	No
CR847976.1	ENSDARG00000083967	rRNA	No
BX649263.1	ENSDARG00000083992	rRNA	No
BX511212.1	ENSDARG00000083996	rRNA	No
CABZ01088337.1	ENSDARG00000084002	rRNA	No
AL929172.1	ENSDARG00000084014	rRNA	No
AL731788.1	ENSDARG00000084018	rRNA	No
BX119975.1	ENSDARG00000084019	rRNA	No
CR394543.1	ENSDARG00000084043	rRNA	No
CU929371.1	ENSDARG00000084059	rRNA	No
CT574575.1	ENSDARG00000084068	snRNA	No
CT583636.1	ENSDARG00000084074	rRNA	No
BX323555.3	ENSDARG00000084079	rRNA	No
BX897750.1	ENSDARG00000084093	rRNA	No
BX322660.1	ENSDARG00000084127	rRNA	No
CABZ01067001.1	ENSDARG00000084142	rRNA	No
CABZ01037786.1	ENSDARG00000084170	rRNA	No
CR788322.1	ENSDARG00000084281	rRNA	No
CR356240.1	ENSDARG00000084316	rRNA	No
AL845306.1	ENSDARG00000084341	rRNA	No
BX544877.1	ENSDARG00000084393	rRNA	No
CR854833.1	ENSDARG00000084476	rRNA	No
BX664716.1	ENSDARG00000084493	rRNA	No
BX936298.1	ENSDARG00000084497	rRNA	No
BX088728.1	ENSDARG00000084515	rRNA	No
BX465838.1	ENSDARG00000084529	rRNA	No
BX248082.1	ENSDARG00000084546	rRNA	No
CR628389.1	ENSDARG00000084593	rRNA	No
BX663611.1	ENSDARG00000084594	rRNA	No
AL845420.1	ENSDARG00000084652	rRNA	No
CABZ01079260.1	ENSDARG00000084687	rRNA	No
AL929006.1	ENSDARG00000084741	rRNA	No
LO017956.1	ENSDARG00000084754	rRNA	No
AL935188.1	ENSDARG00000084766	rRNA	No
CU467013.1	ENSDARG00000084791	rRNA	No
CU929360.1	ENSDARG00000084797	rRNA	No
FO704816.1	ENSDARG00000084853	rRNA	No
CR339055.1	ENSDARG00000084859	rRNA	No
BX539325.1	ENSDARG00000084878	rRNA	No
CR381576.1	ENSDARG00000084966	rRNA	No
CABZ01075745.1	ENSDARG00000085040	rRNA	No
CR394542.1	ENSDARG00000085052	rRNA	No
CR792413.1	ENSDARG00000085074	rRNA	No
BX470072.1	ENSDARG00000085130	snRNA	No
CR848025.1	ENSDARG00000085131	rRNA	No
BX571960.1	ENSDARG00000085140	rRNA	No
CR751228.1	ENSDARG00000085166	snRNA	No
CR376723.1	ENSDARG00000085259	rRNA	No
CU210845.1	ENSDARG00000085277	rRNA	No
CU179658.2	ENSDARG00000085284	rRNA	No
BX663612.1	ENSDARG00000085315	rRNA	No
BX001046.1	ENSDARG00000085317	rRNA	No
CABZ01029590.1	ENSDARG00000085336	rRNA	No
BX323590.2	ENSDARG00000085360	rRNA	No
CR931819.1	ENSDARG00000085409	rRNA	No
BX469926.1	ENSDARG00000085416	rRNA	No
BX572622.1	ENSDARG00000085427	rRNA	No
AL844512.1	ENSDARG00000085437	rRNA	No
CABZ01039424.1	ENSDARG00000085449	rRNA	No
BX950204.1	ENSDARG00000085469	rRNA	No
CABZ01064402.1	ENSDARG00000085478	rRNA	No
CR381560.1	ENSDARG00000085518	rRNA	No
CU326349.2	ENSDARG00000085536	rRNA	No
CABZ01101667.1	ENSDARG00000085602	rRNA	No
BX950211.1	ENSDARG00000085610	rRNA	No
CABZ01033553.1	ENSDARG00000085613	rRNA	No
CU929218.1	ENSDARG00000085644	rRNA	No
AL954150.1	ENSDARG00000085668	rRNA	No
CABZ01079347.1	ENSDARG00000085711	rRNA	No
BX088551.1	ENSDARG00000085740	rRNA	No
FP015963.1	ENSDARG00000085771	rRNA	No
BX936380.1	ENSDARG00000085861	rRNA	No
BX322663.2	ENSDARG00000085884	rRNA	No
BX571884.1	ENSDARG00000085890	rRNA	No
BX469913.1	ENSDARG00000085921	rRNA	No
CR407547.1	ENSDARG00000085941	rRNA	No
BX908722.1	ENSDARG00000085955	rRNA	No
FO907107.1	ENSDARG00000086093	rRNA	No
CU855896.1	ENSDARG00000086105	misc_RNA	No
BX324177.1	ENSDARG00000086128	misc_RNA	No
zp2.1	ENSDARG00000086352	protein_coding	Yes
LO017680.1	ENSDARG00000086521	rRNA	No
BX469912.1	ENSDARG00000086634	misc_RNA	No
CU539064.1	ENSDARG00000087015	misc_RNA	No
BX469912.2	ENSDARG00000087060	misc_RNA	No
CU571247.1	ENSDARG00000087078	rRNA	No
BX928756.1	ENSDARG00000087117	rRNA	No
CU914601.1	ENSDARG00000087140	rRNA	No
hbbe1.3	ENSDARG00000087390	protein_coding	Yes
BX470112.1	ENSDARG00000087468	rRNA	No
LO018227.1	ENSDARG00000087664	rRNA	No
BX649540.1	ENSDARG00000087732	misc_RNA	No
BX469912.3	ENSDARG00000087944	misc_RNA	No
FP236320.1	ENSDARG00000088351	rRNA	No
CABZ01071677.1	ENSDARG00000088667	rRNA	No
si:dkeyp-98a7.7	ENSDARG00000088895	protein_coding	Yes
CABZ01063288.1	ENSDARG00000088916	rRNA	No
CU915272.1	ENSDARG00000089053	rRNA	No
BX936380.2	ENSDARG00000089128	rRNA	No
BX469912.4	ENSDARG00000089201	misc_RNA	No
si:ch211-198e20.10	ENSDARG00000089513	protein_coding	Yes
si:dkey-26g8.5	ENSDARG00000089750	protein_coding	Yes
BX469912.5	ENSDARG00000089845	misc_RNA	No
BX510329.1	ENSDARG00000091392	rRNA	No
zp2.6	ENSDARG00000091409	protein_coding	Yes
BX511084.1	ENSDARG00000091519	transcribed_unprocessed_pseudogene	Yes
BX324177.4	ENSDARG00000091697	misc_RNA	No
CR450808.1	ENSDARG00000091752	rRNA	No
CR932978.1	ENSDARG00000092216	processed_transcript	Yes
CU138515.1	ENSDARG00000092863	processed_transcript	Yes
si:ch211-282k23.2	ENSDARG00000093591	protein_coding	Yes
FP102171.1	ENSDARG00000093749	processed_transcript	Yes
si:dkeyp-98a7.8	ENSDARG00000094674	protein_coding	Yes
taar18b	ENSDARG00000094997	protein_coding	Yes
si:dkey-194e6.2	ENSDARG00000095001	protein_coding	Yes
CU394254.3	ENSDARG00000095061	processed_transcript	Yes
AL929237.2	ENSDARG00000095450	lincRNA	Yes
si:dkey-286h21.1	ENSDARG00000095502	protein_coding	Yes
BX649295.1	ENSDARG00000095824	processed_transcript	Yes
si:ch211-246n15.2	ENSDARG00000096467	protein_coding	Yes
CT573186.2	ENSDARG00000096555	lincRNA	Yes
CR385078.6	ENSDARG00000096745	lincRNA	Yes
si:dkeyp-106c3.2	ENSDARG00000096816	protein_coding	Yes
BX927244.1	ENSDARG00000096950	protein_coding	Yes
si:ch211-108d22.1	ENSDARG00000097099	protein_coding	Yes
CU695222.1	ENSDARG00000097132	lincRNA	Yes
CR854827.2	ENSDARG00000097227	processed_transcript	Yes
CR377223.1	ENSDARG00000098086	rRNA	No
FO904923.1	ENSDARG00000098120	rRNA	No
CABZ01000452.1	ENSDARG00000098160	snRNA	No
FP016029.1	ENSDARG00000098198	rRNA	No
CABZ01023231.1	ENSDARG00000098259	rRNA	No
BX649557.1	ENSDARG00000098339	rRNA	No
CABZ01118806.1	ENSDARG00000098480	rRNA	No
CABZ01022569.1	ENSDARG00000098483	misc_RNA	No
CABZ01083278.1	ENSDARG00000098556	rRNA	No
BX005069.1	ENSDARG00000098565	rRNA	No
CABZ01028323.1	ENSDARG00000098590	snRNA	No
CABZ01018409.1	ENSDARG00000098633	snRNA	No
CR450764.2	ENSDARG00000098682	misc_RNA	No
CABZ01080588.1	ENSDARG00000098690	rRNA	No
CT030017.1	ENSDARG00000098854	rRNA	No
BX119314.1	ENSDARG00000098864	rRNA	No
CU138544.2	ENSDARG00000098895	rRNA	No
CR926128.1	ENSDARG00000098961	snRNA	No
CABZ01059560.1	ENSDARG00000098996	rRNA	No
AL831791.1	ENSDARG00000099000	rRNA	No
BX000991.2	ENSDARG00000099085	rRNA	No
CU570797.1	ENSDARG00000099125	snoRNA	No
BX469912.7	ENSDARG00000099163	misc_RNA	No
CR933103.1	ENSDARG00000099167	rRNA	No
CABZ01089907.1	ENSDARG00000099271	rRNA	No
CU915534.1	ENSDARG00000099303	rRNA	No
BX323006.1	ENSDARG00000099341	snRNA	No
CABZ01026065.1	ENSDARG00000099443	snRNA	No
CABZ01069455.1	ENSDARG00000099477	rRNA	No
BX539325.3	ENSDARG00000099576	rRNA	No
CABZ01111729.1	ENSDARG00000099589	rRNA	No
BX323985.1	ENSDARG00000099611	rRNA	No
CABZ01056919.1	ENSDARG00000099797	rRNA	No
CABZ01092759.1	ENSDARG00000099857	rRNA	No
CABZ01028323.2	ENSDARG00000099912	snRNA	No
CT737148.1	ENSDARG00000099944	rRNA	No
si:dkey-27n6.1	ENSDARG00000099963	protein_coding	Yes
BX936381.1	ENSDARG00000099993	rRNA	No
CR769786.1	ENSDARG00000100059	rRNA	No
AL845481.1	ENSDARG00000100100	rRNA	No
CR926128.2	ENSDARG00000100147	snRNA	No
CABZ01019032.1	ENSDARG00000100245	miRNA	Yes
CABZ01017718.1	ENSDARG00000100441	snRNA	No
CABZ01017718.2	ENSDARG00000100444	snRNA	No
CABZ01112519.1	ENSDARG00000100447	rRNA	No
CABZ01112442.1	ENSDARG00000100542	rRNA	No
CABZ01015393.1	ENSDARG00000100667	rRNA	No
FO907094.1	ENSDARG00000100714	rRNA	No
CABZ01092943.1	ENSDARG00000100748	rRNA	No
CABZ01017718.3	ENSDARG00000100749	snRNA	No
CR926128.3	ENSDARG00000100756	snRNA	No
BX908722.2	ENSDARG00000100760	rRNA	No
CR926128.4	ENSDARG00000100820	snRNA	No
BX294107.1	ENSDARG00000100871	rRNA	No
CR354434.1	ENSDARG00000100928	rRNA	No
BX640547.3	ENSDARG00000100931	snRNA	No
CU694362.1	ENSDARG00000100945	rRNA	No
BX640584.2	ENSDARG00000101006	snRNA	No
CU570984.1	ENSDARG00000101011	rRNA	No
CR855258.1	ENSDARG00000101092	rRNA	No
CR450764.4	ENSDARG00000101099	misc_RNA	No
FQ378020.1	ENSDARG00000101253	rRNA	No
BX640547.4	ENSDARG00000101401	snRNA	No
BX323543.5	ENSDARG00000101491	rRNA	No
CABZ01034962.1	ENSDARG00000101494	rRNA	No
CU463847.1	ENSDARG00000101620	rRNA	No
BX640547.5	ENSDARG00000101647	snRNA	No
BX324136.1	ENSDARG00000101761	rRNA	No
CABZ01060963.1	ENSDARG00000101880	rRNA	No
BX004836.1	ENSDARG00000101904	rRNA	No
CABZ01017718.4	ENSDARG00000101945	snRNA	No
BX321887.1	ENSDARG00000101971	snRNA	No
CABZ01047293.1	ENSDARG00000102037	rRNA	No
CABZ01075316.1	ENSDARG00000102217	snRNA	No
CR450749.3	ENSDARG00000102227	lincRNA	Yes
CR388030.1	ENSDARG00000102238	rRNA	No
CABZ01017718.5	ENSDARG00000102285	snRNA	No
BX321887.2	ENSDARG00000102390	snRNA	No
CR381540.2	ENSDARG00000102409	unprocessed_pseudogene	Yes
CABZ01081522.1	ENSDARG00000102444	rRNA	No
CT025588.2	ENSDARG00000102563	rRNA	No
CABZ01050398.1	ENSDARG00000102655	protein_coding	Yes
CABZ01028323.3	ENSDARG00000102676	snRNA	No
CABZ01017718.6	ENSDARG00000102723	snRNA	No
CABZ01028323.4	ENSDARG00000102775	snRNA	No
CU856253.1	ENSDARG00000102779	snRNA	No
CR753866.1	ENSDARG00000102918	rRNA	No
CABZ01064938.1	ENSDARG00000103041	rRNA	No
CR376761.1	ENSDARG00000103120	sRNA	No
CABZ01067436.1	ENSDARG00000103152	rRNA	No
CABZ01017718.7	ENSDARG00000103267	snRNA	No
BX000985.2	ENSDARG00000103321	rRNA	No
CABZ01003476.2	ENSDARG00000103410	rRNA	No
CABZ01031673.1	ENSDARG00000103431	snRNA	No
FP074902.1	ENSDARG00000103434	lincRNA	Yes
CR848026.1	ENSDARG00000103465	rRNA	No
FP016143.1	ENSDARG00000103550	rRNA	No
CR855311.5	ENSDARG00000103695	rRNA	No
CU570797.2	ENSDARG00000103728	snoRNA	No
BX640584.3	ENSDARG00000103753	snRNA	No
CR450808.4	ENSDARG00000103814	processed_transcript	Yes
CU019662.2	ENSDARG00000103925	rRNA	No
CR388206.3	ENSDARG00000103968	snRNA	No
CU013534.1	ENSDARG00000104019	rRNA	No
FP009765.2	ENSDARG00000104115	rRNA	No
CT573793.3	ENSDARG00000104445	lincRNA	Yes
CR533578.2	ENSDARG00000104544	rRNA	No
CR388049.1	ENSDARG00000104556	rRNA	No
CR926128.5	ENSDARG00000104565	snRNA	No
BX649551.1	ENSDARG00000104585	rRNA	No
CR790382.3	ENSDARG00000104616	snRNA	No
BX950874.1	ENSDARG00000104711	rRNA	No
CABZ01067686.1	ENSDARG00000104764	rRNA	No
CABZ01068945.1	ENSDARG00000104776	rRNA	No
CABZ01028173.1	ENSDARG00000104803	rRNA	No
CABZ01025311.1	ENSDARG00000104876	rRNA	No
CABZ01017718.8	ENSDARG00000104896	snRNA	No
CABZ01048582.1	ENSDARG00000104900	rRNA	No
CABZ01028323.5	ENSDARG00000104948	snRNA	No
CABZ01080472.1	ENSDARG00000104967	rRNA	No
CABZ01017718.9	ENSDARG00000105032	snRNA	No
LO018370.1	ENSDARG00000105051	rRNA	No
CR925723.3	ENSDARG00000105069	processed_transcript	Yes
CABZ01000452.2	ENSDARG00000105076	snRNA	No
BX324177.6	ENSDARG00000105097	misc_RNA	No
si:dkey-65b13.9	ENSDARG00000105249	protein_coding	Yes
CABZ01112519.2	ENSDARG00000105250	rRNA	No
CT956002.3	ENSDARG00000105262	snRNA	No
loc564660	ENSDARG00000105489	protein_coding	Yes
BX248115.1	ENSDARG00000105842	rRNA	No
CABZ01071679.1	ENSDARG00000105873	rRNA	No
AL929005.1	ENSDARG00000105892	rRNA	No
CU469363.1	ENSDARG00000105912	rRNA	No
AL773596.1	ENSDARG00000105957	rRNA	No
CR847870.4	ENSDARG00000105974	protein_coding	Yes
FO203514.1	ENSDARG00000105988	rRNA	No
CR753816.1	ENSDARG00000106008	rRNA	No
BX530083.1	ENSDARG00000106013	rRNA	No
CU695133.1	ENSDARG00000106042	rRNA	No
CU633736.1	ENSDARG00000106047	rRNA	No
CR388209.3	ENSDARG00000106077	rRNA	No
CR931815.1	ENSDARG00000106085	rRNA	No
CR628341.2	ENSDARG00000106101	rRNA	No
BX248104.1	ENSDARG00000106109	rRNA	No
BX465199.1	ENSDARG00000106121	rRNA	No
BX000529.1	ENSDARG00000106124	rRNA	No
CABZ01052320.1	ENSDARG00000106128	rRNA	No
CR293531.2	ENSDARG00000106129	rRNA	No
CR555295.2	ENSDARG00000106151	rRNA	No
CT025546.1	ENSDARG00000106159	rRNA	No
CABZ01053221.2	ENSDARG00000106169	rRNA	No
FP102887.1	ENSDARG00000106188	rRNA	No
BX571719.1	ENSDARG00000106193	rRNA	No
AL928656.1	ENSDARG00000106195	rRNA	No
CR352332.1	ENSDARG00000106225	rRNA	No
BX663516.3	ENSDARG00000106229	rRNA	No
BX897669.1	ENSDARG00000106273	rRNA	No
FP236502.1	ENSDARG00000106275	rRNA	No
BX927159.1	ENSDARG00000106302	rRNA	No
AL935142.1	ENSDARG00000106308	rRNA	No
CU915566.1	ENSDARG00000106311	rRNA	No
CR847977.1	ENSDARG00000106340	rRNA	No
CR933523.1	ENSDARG00000106354	rRNA	No
BX005463.1	ENSDARG00000106364	rRNA	No
CU137649.1	ENSDARG00000106387	rRNA	No
CU694206.1	ENSDARG00000106401	rRNA	No
BX248510.3	ENSDARG00000106411	rRNA	No
CR931761.1	ENSDARG00000106421	rRNA	No
BX511253.2	ENSDARG00000106424	rRNA	No
AL929050.1	ENSDARG00000106436	rRNA	No
CU896674.1	ENSDARG00000106476	rRNA	No
CABZ01070017.1	ENSDARG00000106483	rRNA	No
BX511261.1	ENSDARG00000106508	rRNA	No
CABZ01037139.1	ENSDARG00000106511	rRNA	No
CABZ01040175.1	ENSDARG00000106518	rRNA	No
CABZ01022272.1	ENSDARG00000106525	rRNA	No
CR391943.1	ENSDARG00000106551	rRNA	No
FO704886.1	ENSDARG00000106572	rRNA	No
CABZ01077220.2	ENSDARG00000106607	rRNA	No
CABZ01080059.1	ENSDARG00000106689	rRNA	No
CR450753.1	ENSDARG00000106726	rRNA	No
CU693368.5	ENSDARG00000106729	rRNA	No
CR376803.1	ENSDARG00000106762	rRNA	No
BX323550.2	ENSDARG00000106786	rRNA	No
BX294100.3	ENSDARG00000106796	rRNA	No
AL929172.2	ENSDARG00000106802	rRNA	No
CR450781.1	ENSDARG00000106819	rRNA	No
CR391930.2	ENSDARG00000106840	rRNA	No
BX004769.2	ENSDARG00000106869	rRNA	No
CR762393.1	ENSDARG00000106969	rRNA	No
CT027820.1	ENSDARG00000106982	rRNA	No
CR759918.2	ENSDARG00000107000	rRNA	No
CABZ01087503.1	ENSDARG00000107018	rRNA	No
CR792424.2	ENSDARG00000107054	rRNA	No
CABZ01118763.1	ENSDARG00000107150	rRNA	No
CABZ01071875.1	ENSDARG00000107169	rRNA	No
BX510657.2	ENSDARG00000107172	rRNA	No
CT025739.1	ENSDARG00000107174	rRNA	No
CU329666.2	ENSDARG00000107179	rRNA	No
CU570873.1	ENSDARG00000107180	rRNA	No
BX470227.1	ENSDARG00000107234	rRNA	No
BX901901.1	ENSDARG00000107253	rRNA	No
FP085398.3	ENSDARG00000107267	rRNA	No
CU462859.1	ENSDARG00000107292	rRNA	No
CR388224.1	ENSDARG00000107309	rRNA	No
CR293531.3	ENSDARG00000107324	rRNA	No
CABZ01011828.1	ENSDARG00000107327	rRNA	No
CR396585.2	ENSDARG00000107336	rRNA	No
CT997819.4	ENSDARG00000107356	rRNA	No
BX088524.4	ENSDARG00000107368	rRNA	No
BX296533.1	ENSDARG00000107423	rRNA	No
CR388050.3	ENSDARG00000107445	rRNA	No
BX248229.1	ENSDARG00000107448	rRNA	No
CT030043.1	ENSDARG00000107479	rRNA	No
BX323550.3	ENSDARG00000107482	rRNA	No
BX322612.1	ENSDARG00000107514	rRNA	No
FO681360.1	ENSDARG00000107521	rRNA	No
CU469511.1	ENSDARG00000107556	rRNA	No
AL954726.1	ENSDARG00000107622	rRNA	No
BX649297.1	ENSDARG00000107631	rRNA	No
BX957235.1	ENSDARG00000107649	rRNA	No
AL929252.1	ENSDARG00000107704	rRNA	No
CR855117.2	ENSDARG00000107707	rRNA	No
CR376827.1	ENSDARG00000107724	rRNA	No
BX664731.1	ENSDARG00000107731	rRNA	No
CU855697.2	ENSDARG00000107737	rRNA	No
CR382300.5	ENSDARG00000107770	rRNA	No
BX000991.4	ENSDARG00000107781	rRNA	No
CR318590.1	ENSDARG00000107793	rRNA	No
CR848817.1	ENSDARG00000107860	rRNA	No
CT027612.1	ENSDARG00000107867	rRNA	No
BX537347.1	ENSDARG00000107885	rRNA	No
CR361558.1	ENSDARG00000107923	rRNA	No
AL928740.1	ENSDARG00000107930	rRNA	No
CABZ01029420.1	ENSDARG00000107934	rRNA	No
CABZ01080023.1	ENSDARG00000107936	rRNA	No
CABZ01026684.1	ENSDARG00000107950	rRNA	No
CR847870.5	ENSDARG00000107957	rRNA	No
BX537347.2	ENSDARG00000107970	rRNA	No
AL840638.2	ENSDARG00000107978	rRNA	No
CABZ01053213.1	ENSDARG00000108005	rRNA	No
BX511116.1	ENSDARG00000108025	rRNA	No
LO017643.1	ENSDARG00000108030	rRNA	No
AL954846.1	ENSDARG00000108036	rRNA	No
CU539062.1	ENSDARG00000108061	rRNA	No
CR792443.1	ENSDARG00000108063	rRNA	No
CR759952.1	ENSDARG00000108098	rRNA	No
CR318598.1	ENSDARG00000108158	rRNA	No
AL928851.2	ENSDARG00000108180	rRNA	No
CR932438.1	ENSDARG00000108183	rRNA	No
CABZ01087202.1	ENSDARG00000108217	rRNA	No
CR925719.1	ENSDARG00000108221	rRNA	No
BX005075.1	ENSDARG00000108253	rRNA	No
CABZ01056821.1	ENSDARG00000108259	rRNA	No
CR352297.2	ENSDARG00000108261	rRNA	No
CR450847.1	ENSDARG00000108262	rRNA	No
CABZ01087807.1	ENSDARG00000108279	rRNA	No
BX000523.1	ENSDARG00000108310	rRNA	No
BX530406.1	ENSDARG00000108314	rRNA	No
LO017713.1	ENSDARG00000108327	rRNA	No
CU571333.1	ENSDARG00000108373	rRNA	No
AL929104.1	ENSDARG00000108513	rRNA	No
BX649525.1	ENSDARG00000108551	rRNA	No
CABZ01007794.1	ENSDARG00000108556	rRNA	No
CR354385.1	ENSDARG00000108566	rRNA	No
CABZ01044962.1	ENSDARG00000108569	rRNA	No
BX649596.1	ENSDARG00000108595	rRNA	No
AL845363.1	ENSDARG00000108597	rRNA	No
BX957260.2	ENSDARG00000108602	rRNA	No
CR396595.2	ENSDARG00000108659	rRNA	No
CT573349.1	ENSDARG00000108672	rRNA	No
CR377220.1	ENSDARG00000108673	rRNA	No
BX469928.1	ENSDARG00000108688	rRNA	No
CR792425.1	ENSDARG00000108692	rRNA	No
FP101908.1	ENSDARG00000108731	rRNA	No
CT025546.3	ENSDARG00000108732	rRNA	No
CR388030.2	ENSDARG00000108769	rRNA	No
CU469458.1	ENSDARG00000108806	rRNA	No
CABZ01040166.1	ENSDARG00000108960	rRNA	No
CABZ01032671.1	ENSDARG00000108967	rRNA	No
BX537287.1	ENSDARG00000108999	rRNA	No
LO018450.1	ENSDARG00000109011	rRNA	No
CU462909.1	ENSDARG00000109017	rRNA	No
CR854990.1	ENSDARG00000109031	rRNA	No
BX548046.3	ENSDARG00000109033	rRNA	No
CR385066.1	ENSDARG00000109060	rRNA	No
AL935062.1	ENSDARG00000109133	rRNA	No
CABZ01044816.1	ENSDARG00000109190	rRNA	No
CU915780.1	ENSDARG00000109194	rRNA	No
CR855313.1	ENSDARG00000109203	rRNA	No
BX465857.2	ENSDARG00000109217	rRNA	No
CR356227.2	ENSDARG00000109221	snRNA	No
CR391997.1	ENSDARG00000109227	snRNA	No
CR388206.4	ENSDARG00000109254	snRNA	No
CR769766.1	ENSDARG00000109265	rRNA	No
CU570797.3	ENSDARG00000109270	snoRNA	No
BX890568.1	ENSDARG00000109284	snRNA	No
CU570800.3	ENSDARG00000109285	protein_coding	Yes
CT573222.1	ENSDARG00000109288	rRNA	No
CR450785.2	ENSDARG00000109305	snRNA	No
CR293505.1	ENSDARG00000109321	rRNA	No
BX469935.1	ENSDARG00000109364	rRNA	No
dre-mir-430b-6	ENSDARG00000109380	miRNA	Yes
BX927135.3	ENSDARG00000109385	snRNA	No
CABZ01054289.1	ENSDARG00000109475	rRNA	No
BX000700.5	ENSDARG00000109500	misc_RNA	No
BX324177.8	ENSDARG00000109517	misc_RNA	No
CT573453.1	ENSDARG00000109529	rRNA	No
BX323006.2	ENSDARG00000109530	snRNA	No
CU367852.1	ENSDARG00000109533	snoRNA	No
dre-mir-430b-6	ENSDARG00000109546	miRNA	Yes
CABZ01052747.1	ENSDARG00000109566	protein_coding	Yes
BX957258.2	ENSDARG00000109587	rRNA	No
BX005361.1	ENSDARG00000109589	protein_coding	Yes
CR855320.4	ENSDARG00000109652	snoRNA	No
BX470083.1	ENSDARG00000109656	miRNA	Yes
pimr152	ENSDARG00000109695	protein_coding	Yes
CABZ01043508.1	ENSDARG00000109699	rRNA	No
CR354585.2	ENSDARG00000109707	rRNA	No
LO017719.1	ENSDARG00000109708	misc_RNA	No
dre-mir-430b-10	ENSDARG00000109709	miRNA	Yes
BX324227.2	ENSDARG00000109743	protein_coding	Yes
CR847936.5	ENSDARG00000109748	miRNA	Yes
CABZ01030291.1	ENSDARG00000109750	snoRNA	No
hist1h2a3	ENSDARG00000109755	protein_coding	Yes
AL935334.1	ENSDARG00000109758	rRNA	No
CABZ01030291.2	ENSDARG00000109762	snoRNA	No
BX005022.1	ENSDARG00000109765	rRNA	No
FO904934.1	ENSDARG00000109767	misc_RNA	No
CABZ01069569.1	ENSDARG00000109812	rRNA	No
CU462817.2	ENSDARG00000109845	snRNA	No
CABZ01064929.1	ENSDARG00000109853	rRNA	No
BX323006.3	ENSDARG00000109871	snRNA	No
CU467070.1	ENSDARG00000109883	rRNA	No
CU929195.1	ENSDARG00000109918	rRNA	No
CU570797.4	ENSDARG00000109928	snoRNA	No
CU367852.2	ENSDARG00000109938	snoRNA	No
CU570797.5	ENSDARG00000109939	snoRNA	No
dre-mir-430b-10	ENSDARG00000109941	miRNA	Yes
BX469913.2	ENSDARG00000109943	rRNA	No
dre-mir-430b-10	ENSDARG00000109967	miRNA	Yes
CR388206.5	ENSDARG00000109985	snRNA	No
BX248128.2	ENSDARG00000110006	snRNA	No
dre-mir-430c-1	ENSDARG00000110007	miRNA	Yes
dre-mir-430a-4	ENSDARG00000110053	miRNA	Yes
CABZ01002340.1	ENSDARG00000110070	snRNA	No
CR356227.3	ENSDARG00000110080	snRNA	No
BX511211.1	ENSDARG00000110084	rRNA	No
BX005216.1	ENSDARG00000110134	rRNA	No
CR450785.3	ENSDARG00000110138	snRNA	No
AL935047.1	ENSDARG00000110145	rRNA	No
hist1h4l	ENSDARG00000110152	protein_coding	Yes
BX640584.4	ENSDARG00000110162	snRNA	No
CABZ01041996.1	ENSDARG00000110165	miRNA	Yes
BX640584.5	ENSDARG00000110196	snRNA	No
CABZ01023973.1	ENSDARG00000110200	rRNA	No
CU367852.3	ENSDARG00000110201	snoRNA	No
BX323079.2	ENSDARG00000110208	rRNA	No
BX000700.8	ENSDARG00000110209	misc_RNA	No
BX511056.1	ENSDARG00000110228	miRNA	Yes
CABZ01013727.1	ENSDARG00000110239	rRNA	No
BX323083.2	ENSDARG00000110242	processed_transcript	Yes
CR391997.2	ENSDARG00000110247	snRNA	No
FO904934.2	ENSDARG00000110258	misc_RNA	No
CU457778.3	ENSDARG00000110310	snRNA	No
CR556722.1	ENSDARG00000110314	rRNA	No
FP091248.1	ENSDARG00000110331	rRNA	No
BX465868.3	ENSDARG00000110337	rRNA	No
BX908721.2	ENSDARG00000110338	rRNA	No
LO018585.1	ENSDARG00000110380	rRNA	No
BX537296.1	ENSDARG00000110416	miRNA	Yes
CABZ01063542.1	ENSDARG00000110443	rRNA	No
LO018242.1	ENSDARG00000110477	rRNA	No
si:dkey-199f5.4	ENSDARG00000110483	protein_coding	Yes
LO018311.1	ENSDARG00000110490	rRNA	No
CR450741.1	ENSDARG00000110491	rRNA	No
FP085393.1	ENSDARG00000110523	rRNA	No
si:dkey-31m5.7	ENSDARG00000110529	protein_coding	Yes
BX470083.2	ENSDARG00000110559	miRNA	Yes
CR450785.4	ENSDARG00000110566	snRNA	No
CABZ01030292.1	ENSDARG00000110604	snoRNA	No
dre-mir-430b-1	ENSDARG00000110605	miRNA	Yes
BX548033.1	ENSDARG00000110615	rRNA	No
BX321887.3	ENSDARG00000110640	snRNA	No
CU693455.1	ENSDARG00000110651	rRNA	No
BX537296.2	ENSDARG00000110681	miRNA	Yes
CU074421.2	ENSDARG00000110683	rRNA	No
CR391997.3	ENSDARG00000110765	snRNA	No
BX005280.1	ENSDARG00000110776	rRNA	No
AL772241.2	ENSDARG00000110792	protein_coding	Yes
CU207217.2	ENSDARG00000110796	rRNA	No
pimr16	ENSDARG00000110797	protein_coding	Yes
BX321887.4	ENSDARG00000110813	snRNA	No
BX548073.7	ENSDARG00000110818	miRNA	Yes
BX321887.5	ENSDARG00000110822	snRNA	No
BX950179.1	ENSDARG00000110825	rRNA	No
AL929195.2	ENSDARG00000110830	snRNA	No
CR450785.5	ENSDARG00000110846	snRNA	No
CR450785.6	ENSDARG00000110847	snRNA	No
BX324177.9	ENSDARG00000110849	misc_RNA	No
CR942805.1	ENSDARG00000110865	rRNA	No
CU570797.6	ENSDARG00000110897	snoRNA	No
BX465215.1	ENSDARG00000110898	rRNA	No
FO681358.1	ENSDARG00000110906	rRNA	No
CU457778.4	ENSDARG00000110908	snRNA	No
CR356227.4	ENSDARG00000110916	snRNA	No
CR356235.1	ENSDARG00000110930	rRNA	No
CR377220.2	ENSDARG00000110937	snoRNA	No
dre-mir-430b-10	ENSDARG00000110957	miRNA	Yes
BX957352.1	ENSDARG00000110964	rRNA	No
AL929195.3	ENSDARG00000110981	snRNA	No
VMAC	ENSDARG00000110997	protein_coding	Yes
LO018677.1	ENSDARG00000111003	rRNA	No
AL732515.2	ENSDARG00000111015	rRNA	No
BX511056.2	ENSDARG00000111022	miRNA	Yes
BX640584.6	ENSDARG00000111032	snRNA	No
BX004800.2	ENSDARG00000111041	rRNA	No
CR450764.8	ENSDARG00000111044	misc_RNA	No
si:ch211-165a10.5	ENSDARG00000111051	protein_coding	Yes
si:dkey-58b18.2	ENSDARG00000111054	protein_coding	Yes
BX469912.8	ENSDARG00000111064	misc_RNA	No
BX324177.10	ENSDARG00000111072	misc_RNA	No
CR752651.1	ENSDARG00000111090	rRNA	No
BX000700.9	ENSDARG00000111095	misc_RNA	No
AL831789.1	ENSDARG00000111112	rRNA	No
CU694442.2	ENSDARG00000111124	rRNA	No
CABZ01087282.1	ENSDARG00000111127	rRNA	No
CR388206.6	ENSDARG00000111137	snRNA	No
BX470133.1	ENSDARG00000111149	rRNA	No
BX000700.11	ENSDARG00000111163	misc_RNA	No
CR356227.5	ENSDARG00000111187	snRNA	No
BX530067.1	ENSDARG00000111201	rRNA	No
BX537296.3	ENSDARG00000111205	miRNA	Yes
CR450785.7	ENSDARG00000111217	snRNA	No
BX321887.6	ENSDARG00000111220	snRNA	No
pimr152	ENSDARG00000111230	protein_coding	Yes
CR936966.1	ENSDARG00000111236	rRNA	No
BX928751.1	ENSDARG00000111254	snoRNA	No
CR388206.7	ENSDARG00000111278	snRNA	No
FO904915.1	ENSDARG00000111291	rRNA	No
CR450785.8	ENSDARG00000111322	snRNA	No
BX248128.3	ENSDARG00000111328	snRNA	No
CR388206.8	ENSDARG00000111330	snRNA	No
BX324177.11	ENSDARG00000111350	misc_RNA	No
AL954187.4	ENSDARG00000111356	rRNA	No
BX005305.2	ENSDARG00000111373	protein_coding	Yes
dre-mir-430a-4	ENSDARG00000111403	miRNA	Yes
BX664719.1	ENSDARG00000111411	rRNA	No
CABZ01117597.1	ENSDARG00000111412	rRNA	No
CT033803.1	ENSDARG00000111422	protein_coding	Yes
CR631124.1	ENSDARG00000111469	rRNA	No
CU570797.7	ENSDARG00000111498	snoRNA	No
AL929195.4	ENSDARG00000111505	snRNA	No
BX321887.7	ENSDARG00000111520	snRNA	No
CU905509.1	ENSDARG00000111523	rRNA	No
BX005194.1	ENSDARG00000111524	rRNA	No
dre-mir-430a-2	ENSDARG00000111541	miRNA	Yes
CR753874.1	ENSDARG00000111564	rRNA	No
CR931819.2	ENSDARG00000111565	rRNA	No
BX321887.8	ENSDARG00000111578	snRNA	No
BX465840.1	ENSDARG00000111594	rRNA	No
CR391997.4	ENSDARG00000111602	snRNA	No
CU570797.8	ENSDARG00000111622	snoRNA	No
CR926128.6	ENSDARG00000111628	snRNA	No
CR381673.3	ENSDARG00000111630	rRNA	No
AL627088.2	ENSDARG00000111632	rRNA	No
FP015852.1	ENSDARG00000111639	rRNA	No
CU459136.1	ENSDARG00000111664	rRNA	No
CR392341.5	ENSDARG00000111666	rRNA	No
CABZ01117863.1	ENSDARG00000111706	rRNA	No
CR388189.6	ENSDARG00000111709	snRNA	No
BX530024.2	ENSDARG00000111732	rRNA	No
AL954146.2	ENSDARG00000111739	rRNA	No
CABZ01029902.1	ENSDARG00000111741	rRNA	No
CR450785.9	ENSDARG00000111750	snRNA	No
CR388206.9	ENSDARG00000111764	snRNA	No
CR405692.1	ENSDARG00000111776	rRNA	No
BX004794.1	ENSDARG00000111804	rRNA	No
CU367852.4	ENSDARG00000111813	snoRNA	No
CR450785.10	ENSDARG00000111830	snRNA	No
BX511311.4	ENSDARG00000111834	miRNA	Yes
BX511056.3	ENSDARG00000111841	miRNA	Yes
BX000451.4	ENSDARG00000111843	rRNA	No
CU457778.5	ENSDARG00000111844	snRNA	No
CU457778.6	ENSDARG00000111878	snRNA	No
CR356223.3	ENSDARG00000111887	snRNA	No
CU462817.3	ENSDARG00000111903	snRNA	No
CU137717.2	ENSDARG00000111936	rRNA	No
dre-mir-430a-11	ENSDARG00000111943	miRNA	Yes
CABZ01002342.1	ENSDARG00000111951	snRNA	No
dre-mir-430a-2	ENSDARG00000111975	miRNA	Yes
CABZ01068235.1	ENSDARG00000111987	rRNA	No
FO681289.1	ENSDARG00000112004	rRNA	No
BX324134.3	ENSDARG00000112008	rRNA	No
CABZ01030292.2	ENSDARG00000112042	snoRNA	No
AL929195.5	ENSDARG00000112059	snRNA	No
FP015850.1	ENSDARG00000112066	rRNA	No
si:dkey-59p5.1	ENSDARG00000112081	protein_coding	Yes
pimr166	ENSDARG00000112108	protein_coding	Yes
CR388067.1	ENSDARG00000112147	rRNA	No
CABZ01080023.2	ENSDARG00000112149	rRNA	No
pimr154	ENSDARG00000112183	protein_coding	Yes
CT737162.3	ENSDARG00000112197	rRNA	No
BX000700.13	ENSDARG00000112210	misc_RNA	No
CABZ01014721.1	ENSDARG00000112214	rRNA	No
CU367852.5	ENSDARG00000112219	snoRNA	No
CR391997.5	ENSDARG00000112221	snRNA	No
BX469912.9	ENSDARG00000112225	misc_RNA	No
CR391924.1	ENSDARG00000112232	rRNA	No
LO018405.2	ENSDARG00000112249	rRNA	No
LO018296.1	ENSDARG00000112273	rRNA	No
LO018445.1	ENSDARG00000112289	rRNA	No
BX537263.2	ENSDARG00000112308	pseudogene	Yes
BX936381.2	ENSDARG00000112312	rRNA	No
CU855896.2	ENSDARG00000112315	misc_RNA	No
CR361560.1	ENSDARG00000112322	rRNA	No
CR376853.1	ENSDARG00000112338	rRNA	No
CR854846.1	ENSDARG00000112374	misc_RNA	No
CR352297.3	ENSDARG00000112379	rRNA	No
FP101880.1	ENSDARG00000112393	rRNA	No
BX324177.12	ENSDARG00000112394	misc_RNA	No
CT027578.2	ENSDARG00000112409	snRNA	No
BX324177.13	ENSDARG00000112413	misc_RNA	No
CR926128.7	ENSDARG00000112420	snRNA	No
CABZ01011390.1	ENSDARG00000112440	rRNA	No
BX321887.9	ENSDARG00000112457	snRNA	No
BX897692.2	ENSDARG00000112461	rRNA	No
CR847990.1	ENSDARG00000112462	rRNA	No
BX640584.7	ENSDARG00000112468	snRNA	No
CU424460.1	ENSDARG00000112488	rRNA	No
BX548045.2	ENSDARG00000112500	rRNA	No
dre-mir-430a-2	ENSDARG00000112506	miRNA	Yes
BX640584.8	ENSDARG00000112514	snRNA	No
AL805905.1	ENSDARG00000112515	rRNA	No
hist1h4l	ENSDARG00000112528	protein_coding	Yes
CU929259.2	ENSDARG00000112529	rRNA	No
CU570797.9	ENSDARG00000112553	snoRNA	No
FO704724.2	ENSDARG00000112559	rRNA	No
CR753823.1	ENSDARG00000112562	rRNA	No
BX511311.5	ENSDARG00000112594	miRNA	Yes
pimr15	ENSDARG00000112602	protein_coding	Yes
BX324156.1	ENSDARG00000112614	rRNA	No
AL645691.3	ENSDARG00000112634	rRNA	No
AL954648.1	ENSDARG00000112636	rRNA	No
CR356227.6	ENSDARG00000112639	snRNA	No
CU462817.4	ENSDARG00000112652	snRNA	No
BX465862.5	ENSDARG00000112657	rRNA	No
BX539308.1	ENSDARG00000112668	rRNA	No
CU570897.1	ENSDARG00000112680	rRNA	No
pimr152	ENSDARG00000112706	protein_coding	Yes
BX842670.1	ENSDARG00000112707	rRNA	No
CABZ01087533.1	ENSDARG00000112708	rRNA	No
CU855953.1	ENSDARG00000112718	rRNA	No
CU694495.1	ENSDARG00000112729	rRNA	No
CABZ01002342.2	ENSDARG00000112738	snRNA	No
si:ch211-165a10.5	ENSDARG00000112750	protein_coding	Yes
CR751224.2	ENSDARG00000112753	rRNA	No
BX640584.9	ENSDARG00000112757	snRNA	No
AL929184.1	ENSDARG00000112786	rRNA	No
dre-mir-430b-18	ENSDARG00000112802	miRNA	Yes
CU570797.10	ENSDARG00000112804	snoRNA	No
CR450785.12	ENSDARG00000112824	snRNA	No
CU462817.5	ENSDARG00000112834	snRNA	No
BX294100.4	ENSDARG00000112848	rRNA	No
BX323083.3	ENSDARG00000112850	processed_transcript	Yes
CU179717.1	ENSDARG00000112863	rRNA	No
CABZ01111725.1	ENSDARG00000112866	rRNA	No
BX276187.1	ENSDARG00000112886	rRNA	No
BX072554.3	ENSDARG00000112906	rRNA	No
CR450764.9	ENSDARG00000112907	misc_RNA	No
BX649510.1	ENSDARG00000112955	rRNA	No
CR926128.8	ENSDARG00000112973	snRNA	No
BX928746.1	ENSDARG00000112975	rRNA	No
AL928685.3	ENSDARG00000112980	rRNA	No
CR356223.4	ENSDARG00000112987	snRNA	No
BX510317.1	ENSDARG00000112991	rRNA	No
CABZ01079183.1	ENSDARG00000112996	rRNA	No
CU467865.1	ENSDARG00000113021	rRNA	No
CABZ01053739.1	ENSDARG00000113024	rRNA	No
CR352310.1	ENSDARG00000113026	rRNA	No
pimr58	ENSDARG00000113044	protein_coding	Yes
CR450785.13	ENSDARG00000113058	snRNA	No
dre-mir-430b-6	ENSDARG00000113073	miRNA	Yes
BX119954.1	ENSDARG00000113080	rRNA	No
CR925698.1	ENSDARG00000113099	rRNA	No
BX640547.6	ENSDARG00000113119	snRNA	No
BX548073.8	ENSDARG00000113134	miRNA	Yes
BX928751.2	ENSDARG00000113149	snoRNA	No
AL732610.1	ENSDARG00000113153	rRNA	No
AL929208.2	ENSDARG00000113155	rRNA	No
CR545476.2	ENSDARG00000113157	rRNA	No
BX469912.11	ENSDARG00000113172	misc_RNA	No
BX640584.10	ENSDARG00000113194	snRNA	No
CU457778.7	ENSDARG00000113195	snRNA	No
BX537335.1	ENSDARG00000113203	rRNA	No
BX511311.6	ENSDARG00000113204	miRNA	Yes
FO681358.2	ENSDARG00000113211	rRNA	No
CU367852.6	ENSDARG00000113221	snoRNA	No
CR383669.5	ENSDARG00000113230	rRNA	No
CR927368.1	ENSDARG00000113240	rRNA	No
CU462817.6	ENSDARG00000113272	snRNA	No
dre-mir-430c-1	ENSDARG00000113279	miRNA	Yes
BX248128.5	ENSDARG00000113288	snRNA	No
CR926128.9	ENSDARG00000113290	snRNA	No
BX005056.3	ENSDARG00000113292	rRNA	No
CABZ01015297.1	ENSDARG00000113297	rRNA	No
CT827808.1	ENSDARG00000113307	rRNA	No
CABZ01002342.3	ENSDARG00000113321	snRNA	No
BX324177.16	ENSDARG00000113323	misc_RNA	No
BX640584.11	ENSDARG00000113340	snRNA	No
CABZ01031768.1	ENSDARG00000113343	rRNA	No
CU367852.7	ENSDARG00000113344	snoRNA	No
CABZ01054876.1	ENSDARG00000113353	rRNA	No
dre-mir-430c-1	ENSDARG00000113362	miRNA	Yes
dre-mir-430c-1	ENSDARG00000113369	miRNA	Yes
BX927369.2	ENSDARG00000113379	rRNA	No
CR356223.5	ENSDARG00000113385	snRNA	No
CR388206.10	ENSDARG00000113412	snRNA	No
BX324157.1	ENSDARG00000113428	rRNA	No
CR356227.7	ENSDARG00000113432	snRNA	No
dre-mir-430a-4	ENSDARG00000113472	miRNA	Yes
CR450785.14	ENSDARG00000113483	snRNA	No
CABZ01049773.1	ENSDARG00000113498	rRNA	No
pimr45	ENSDARG00000113502	protein_coding	Yes
BX469912.12	ENSDARG00000113506	misc_RNA	No
BX649356.3	ENSDARG00000113520	rRNA	No
CR847962.1	ENSDARG00000113535	rRNA	No
CR753861.1	ENSDARG00000113536	rRNA	No
CR450764.11	ENSDARG00000113540	misc_RNA	No
CT025888.1	ENSDARG00000113541	rRNA	No
CR753861.2	ENSDARG00000113550	rRNA	No
BX511108.2	ENSDARG00000113563	rRNA	No
BX005073.4	ENSDARG00000113567	rRNA	No
CR450785.15	ENSDARG00000113581	snRNA	No
CT033816.1	ENSDARG00000113585	rRNA	No
AL928843.1	ENSDARG00000113587	rRNA	No
FQ377940.1	ENSDARG00000113594	rRNA	No
BX511311.7	ENSDARG00000113606	miRNA	Yes
dre-mir-430a-16	ENSDARG00000113618	miRNA	Yes
BX470083.3	ENSDARG00000113637	miRNA	Yes
AL935186.9	ENSDARG00000113671	protein_coding	Yes
CR356227.8	ENSDARG00000113683	snRNA	No
si:dkey-31m5.5	ENSDARG00000113712	protein_coding	Yes
CU571308.1	ENSDARG00000113717	rRNA	No
CR759970.2	ENSDARG00000113726	rRNA	No
AL929195.6	ENSDARG00000113730	snRNA	No
BX928751.3	ENSDARG00000113731	snoRNA	No
si:dkey-234l24.7	ENSDARG00000113738	protein_coding	Yes
CU367852.8	ENSDARG00000113745	snoRNA	No
CABZ01009247.1	ENSDARG00000113746	rRNA	No
CR352303.1	ENSDARG00000113753	rRNA	No
zgc:153137	ENSDARG00000113796	protein_coding	Yes
AL929195.7	ENSDARG00000113816	snRNA	No
CABZ01002342.4	ENSDARG00000113822	snRNA	No
CU459210.2	ENSDARG00000113824	rRNA	No
LO017719.2	ENSDARG00000113827	misc_RNA	No
CU570797.11	ENSDARG00000113840	snoRNA	No
AL845314.1	ENSDARG00000113846	rRNA	No
CU367852.9	ENSDARG00000113849	snoRNA	No
LO017719.3	ENSDARG00000113868	misc_RNA	No
CABZ01044767.1	ENSDARG00000113869	rRNA	No
BX547993.2	ENSDARG00000113890	rRNA	No
CU367852.10	ENSDARG00000113902	snoRNA	No
CR388225.1	ENSDARG00000113923	rRNA	No
CR450785.16	ENSDARG00000113937	snRNA	No
CR450785.17	ENSDARG00000113950	snRNA	No
CR388206.11	ENSDARG00000113984	snRNA	No
BX511196.1	ENSDARG00000114000	rRNA	No
CR926128.10	ENSDARG00000114034	snRNA	No
BX248128.6	ENSDARG00000114041	rRNA	No
BX321870.3	ENSDARG00000114042	rRNA	No
CABZ01100214.1	ENSDARG00000114043	rRNA	No
BX323006.4	ENSDARG00000114078	snRNA	No
BX324177.19	ENSDARG00000114084	misc_RNA	No
BX005278.1	ENSDARG00000114090	rRNA	No
CT573447.1	ENSDARG00000114096	rRNA	No
CR388206.13	ENSDARG00000114101	snRNA	No
CU457778.8	ENSDARG00000114131	snRNA	No
pimr86	ENSDARG00000114139	protein_coding	Yes
FP245452.1	ENSDARG00000114156	rRNA	No
CABZ01061905.1	ENSDARG00000114157	rRNA	No
dre-mir-430c-1	ENSDARG00000114183	miRNA	Yes
CABZ01002339.1	ENSDARG00000114193	snRNA	No
BX548073.9	ENSDARG00000114222	miRNA	Yes
AL935164.1	ENSDARG00000114243	rRNA	No
CR450785.18	ENSDARG00000114244	snRNA	No
zgc:91850	ENSDARG00000114254	protein_coding	Yes
dre-mir-430b-1	ENSDARG00000114255	miRNA	Yes
CR356227.10	ENSDARG00000114264	snRNA	No
BX321887.10	ENSDARG00000114265	snRNA	No
CR382374.1	ENSDARG00000114275	rRNA	No
dre-mir-430b-9	ENSDARG00000114311	miRNA	Yes
BX465840.2	ENSDARG00000114320	rRNA	No
dre-mir-430a-2	ENSDARG00000114347	miRNA	Yes
BX469912.13	ENSDARG00000114352	misc_RNA	No
BX537263.4	ENSDARG00000114355	rRNA	No
CABZ01088576.1	ENSDARG00000114360	rRNA	No
CU570797.12	ENSDARG00000114361	snoRNA	No
BX640584.12	ENSDARG00000114371	snRNA	No
BX005305.4	ENSDARG00000114385	protein_coding	Yes
BX005399.9	ENSDARG00000114407	protein_coding	Yes
pimr5	ENSDARG00000114433	protein_coding	Yes
CT990567.4	ENSDARG00000114441	rRNA	No
BX004842.1	ENSDARG00000114445	rRNA	No
pimr164	ENSDARG00000114455	protein_coding	Yes
dre-mir-430c-1	ENSDARG00000114485	miRNA	Yes
BX000534.2	ENSDARG00000114491	rRNA	No
CR450785.19	ENSDARG00000114517	snRNA	No
BX511056.4	ENSDARG00000114519	miRNA	Yes
CABZ01070983.1	ENSDARG00000114530	rRNA	No
CR753838.1	ENSDARG00000114573	rRNA	No
BX321887.11	ENSDARG00000114576	snRNA	No
dre-mir-430c-1	ENSDARG00000114599	miRNA	Yes
AL935145.4	ENSDARG00000114604	rRNA	No
BX324177.20	ENSDARG00000114626	misc_RNA	No
CR388176.1	ENSDARG00000114627	rRNA	No
CR387927.3	ENSDARG00000114634	rRNA	No
BX511086.2	ENSDARG00000114658	rRNA	No
CU367852.11	ENSDARG00000114688	snoRNA	No
FP074902.6	ENSDARG00000114702	lincRNA	Yes
CR854846.2	ENSDARG00000114737	misc_RNA	No
AL954832.1	ENSDARG00000114767	rRNA	No
CU462817.7	ENSDARG00000114770	snRNA	No
BX640584.13	ENSDARG00000114772	snRNA	No
CR450785.20	ENSDARG00000114778	snRNA	No
BX248128.7	ENSDARG00000114789	snRNA	No
CU367852.12	ENSDARG00000114807	snoRNA	No
CR407598.2	ENSDARG00000114817	lincRNA	Yes
dre-mir-430c-1	ENSDARG00000114836	miRNA	Yes
BX469912.14	ENSDARG00000114837	misc_RNA	No
CABZ01012382.1	ENSDARG00000114855	rRNA	No
BX005268.1	ENSDARG00000114925	snRNA	No
CR391997.6	ENSDARG00000114930	snRNA	No
BX927341.4	ENSDARG00000114933	miRNA	Yes
BX005361.5	ENSDARG00000114949	protein_coding	Yes
CR376846.1	ENSDARG00000114954	rRNA	No
CABZ01034956.1	ENSDARG00000114973	rRNA	No
BX000700.22	ENSDARG00000115022	misc_RNA	No
CR932978.2	ENSDARG00000115023	processed_transcript	Yes
BX321887.12	ENSDARG00000115028	snRNA	No
BX469912.15	ENSDARG00000115036	misc_RNA	No
CR926128.11	ENSDARG00000115044	snRNA	No
CT025888.2	ENSDARG00000115049	rRNA	No
BX470083.4	ENSDARG00000115059	miRNA	Yes
BX088728.3	ENSDARG00000115080	rRNA	No
CR855320.5	ENSDARG00000115102	snoRNA	No
CR388206.14	ENSDARG00000115113	snRNA	No
BX511056.5	ENSDARG00000115114	miRNA	Yes
BX321887.13	ENSDARG00000115134	snRNA	No
CR391997.7	ENSDARG00000115165	snRNA	No
LO017763.1	ENSDARG00000115166	rRNA	No
CR932438.2	ENSDARG00000115204	snRNA	No
CR759895.1	ENSDARG00000115209	rRNA	No
AL929195.8	ENSDARG00000115215	snRNA	No
crygm2b	ENSDARG00000115234	protein_coding	Yes
BX005437.2	ENSDARG00000115243	rRNA	No
BX927234.2	ENSDARG00000115246	protein_coding	Yes
dre-mir-430a-2	ENSDARG00000115251	miRNA	Yes
si:ch211-238p8.18	ENSDARG00000115263	protein_coding	Yes
CABZ01031674.1	ENSDARG00000115278	snRNA	No
BX901919.1	ENSDARG00000115286	rRNA	No
CR855320.6	ENSDARG00000115288	snoRNA	No
CABZ01022564.1	ENSDARG00000115291	misc_RNA	No
LO017852.2	ENSDARG00000115296	rRNA	No
CABZ01061901.1	ENSDARG00000115310	rRNA	No
pimr159	ENSDARG00000115311	protein_coding	Yes
dre-mir-430b-18	ENSDARG00000115317	miRNA	Yes
BX548067.3	ENSDARG00000115323	snRNA	No
BX908796.5	ENSDARG00000115344	lincRNA	Yes
CU693455.2	ENSDARG00000115357	rRNA	No
CR391997.8	ENSDARG00000115367	snRNA	No
CR926128.12	ENSDARG00000115376	snRNA	No
CR926128.13	ENSDARG00000115379	snRNA	No
BX640584.14	ENSDARG00000115393	snRNA	No
CR388191.1	ENSDARG00000115394	rRNA	No
BX890598.1	ENSDARG00000115398	rRNA	No
hbbe1.2	ENSDARG00000115405	protein_coding	Yes
AL929330.1	ENSDARG00000115414	rRNA	No
CU137649.2	ENSDARG00000115420	rRNA	No
CR356227.11	ENSDARG00000115434	snRNA	No
BX530069.2	ENSDARG00000115442	rRNA	No
CR352285.2	ENSDARG00000115455	rRNA	No
CU467013.2	ENSDARG00000115458	rRNA	No
BX000700.23	ENSDARG00000115479	misc_RNA	No
CU367852.13	ENSDARG00000115495	snoRNA	No
dre-mir-430c-1	ENSDARG00000115532	miRNA	Yes
BX640584.15	ENSDARG00000115551	snRNA	No
BX928751.4	ENSDARG00000115569	snoRNA	No
CR391997.9	ENSDARG00000115598	snRNA	No
CU929192.1	ENSDARG00000115601	rRNA	No
CABZ01022564.3	ENSDARG00000115624	misc_RNA	No
CR786576.2	ENSDARG00000115638	rRNA	No
CABZ01002342.5	ENSDARG00000115641	snRNA	No
dre-mir-430a-16	ENSDARG00000115654	miRNA	Yes
CU611053.1	ENSDARG00000115673	rRNA	No
pimr18	ENSDARG00000115685	protein_coding	Yes
BX927136.2	ENSDARG00000115750	rRNA	No
CU861893.1	ENSDARG00000115768	rRNA	No
CR450764.16	ENSDARG00000115772	misc_RNA	No
BX470083.5	ENSDARG00000115788	miRNA	Yes
BX323006.5	ENSDARG00000115792	snRNA	No
CABZ01113123.1	ENSDARG00000115811	rRNA	No
BX323083.5	ENSDARG00000115895	processed_transcript	Yes
CT573012.1	ENSDARG00000115905	rRNA	No
BX324177.22	ENSDARG00000115919	misc_RNA	No
CU469499.1	ENSDARG00000115967	rRNA	No
CT573497.2	ENSDARG00000115983	rRNA	No
CABZ01067440.1	ENSDARG00000115997	rRNA	No
BX640584.16	ENSDARG00000116010	snRNA	No
CU462817.8	ENSDARG00000116013	snRNA	No
AL928610.1	ENSDARG00000116022	rRNA	No
dre-mir-430c-1	ENSDARG00000116026	miRNA	Yes
BX640584.17	ENSDARG00000116031	snRNA	No
CR388206.15	ENSDARG00000116034	snRNA	No
BX547993.4	ENSDARG00000116036	rRNA	No
CABZ01002342.6	ENSDARG00000116044	snRNA	No
pimr58	ENSDARG00000116053	protein_coding	Yes
pimr17	ENSDARG00000116090	protein_coding	Yes
CR932364.1	ENSDARG00000116094	protein_coding	Yes
AL929460.1	ENSDARG00000116108	rRNA	No
AL954146.3	ENSDARG00000116112	rRNA	No
LO018354.1	ENSDARG00000116116	rRNA	No
BX324177.23	ENSDARG00000116132	misc_RNA	No
BX928751.5	ENSDARG00000116147	snoRNA	No
CU462817.9	ENSDARG00000116155	snRNA	No
CU570797.13	ENSDARG00000116159	snoRNA	No
BX005305.5	ENSDARG00000116187	protein_coding	Yes
CR848784.5	ENSDARG00000116227	processed_transcript	Yes
CU550697.1	ENSDARG00000116228	rRNA	No
CR926128.14	ENSDARG00000116231	snRNA	No
pimr104	ENSDARG00000116254	protein_coding	Yes
dre-mir-430b-10	ENSDARG00000116261	miRNA	Yes
BX537277.2	ENSDARG00000116268	miRNA	Yes
AL645822.1	ENSDARG00000116276	rRNA	No
AL929195.9	ENSDARG00000116291	snRNA	No
CR749163.3	ENSDARG00000116306	rRNA	No
CABZ01051901.2	ENSDARG00000116320	rRNA	No
BX004886.1	ENSDARG00000116352	rRNA	No
CR356227.12	ENSDARG00000116360	snRNA	No
CR936972.1	ENSDARG00000116362	rRNA	No
BX649282.5	ENSDARG00000116365	rRNA	No
CR450785.21	ENSDARG00000116396	snRNA	No
CU856157.1	ENSDARG00000116405	rRNA	No
BX928751.6	ENSDARG00000116406	snoRNA	No
CU570797.14	ENSDARG00000116415	snoRNA	No
BX664622.2	ENSDARG00000116420	rRNA	No
AL844563.2	ENSDARG00000116421	rRNA	No
CABZ01022569.3	ENSDARG00000116452	misc_RNA	No
CR450785.22	ENSDARG00000116472	snRNA	No
dre-mir-430a-2	ENSDARG00000116475	miRNA	Yes
CABZ01063426.1	ENSDARG00000116478	rRNA	No
BX927290.1	ENSDARG00000116479	snRNA	No
dre-mir-430c-1	ENSDARG00000116481	miRNA	Yes
pimr157	ENSDARG00000116490	protein_coding	Yes
CU570797.15	ENSDARG00000116506	snoRNA	No
CR450787.2	ENSDARG00000116514	rRNA	No
CR933001.1	ENSDARG00000116547	rRNA	No
CABZ01117963.1	ENSDARG00000116573	rRNA	No
BX321887.14	ENSDARG00000116579	snRNA	No
pimr160	ENSDARG00000116627	protein_coding	Yes
CU302223.1	ENSDARG00000116636	rRNA	No
CR388206.16	ENSDARG00000116653	snRNA	No
BX927164.2	ENSDARG00000116657	rRNA	No
si:ch211-165a10.3	ENSDARG00000116661	protein_coding	Yes
CR847906.2	ENSDARG00000116675	rRNA	No
pimr25	ENSDARG00000116676	protein_coding	Yes
CU138515.2	ENSDARG00000116683	rRNA	No
BX470154.2	ENSDARG00000116691	rRNA	No
AL844185.2	ENSDARG00000116705	rRNA	No
BX537296.4	ENSDARG00000116707	miRNA	Yes
CU462817.10	ENSDARG00000116708	snRNA	No
BX511127.1	ENSDARG00000116715	rRNA	No
BX640518.1	ENSDARG00000116720	rRNA	No
BX571773.1	ENSDARG00000116736	rRNA	No
CU367852.14	ENSDARG00000116747	snoRNA	No
dre-mir-430c-1	ENSDARG00000116749	miRNA	Yes
CR450827.7	ENSDARG00000116770	unprocessed_pseudogene	Yes
BX469926.2	ENSDARG00000116772	rRNA	No
BX323017.1	ENSDARG00000116784	rRNA	No
BX511056.6	ENSDARG00000116823	miRNA	Yes
pimr41	ENSDARG00000116830	protein_coding	Yes
BX640536.2	ENSDARG00000116840	rRNA	No
AL929195.10	ENSDARG00000116853	snRNA	No
CR846093.3	ENSDARG00000116865	rRNA	No
CR388206.17	ENSDARG00000116887	snRNA	No
CT583720.1	ENSDARG00000116909	rRNA	No
BX321887.15	ENSDARG00000116910	snRNA	No
CR450785.23	ENSDARG00000116916	snRNA	No
CU367848.1	ENSDARG00000116917	rRNA	No
CT027805.2	ENSDARG00000116924	rRNA	No
FP102896.1	ENSDARG00000116938	rRNA	No
CR391935.2	ENSDARG00000116945	rRNA	No
BX950852.2	ENSDARG00000116952	rRNA	No
BX928751.7	ENSDARG00000116958	snoRNA	No
CR388206.18	ENSDARG00000116979	snRNA	No
taar12f	ENSDARG00000116990	protein_coding	Yes
CABZ01036526.1	ENSDARG00000117031	rRNA	No
CR388206.19	ENSDARG00000117056	snRNA	No
BX000700.27	ENSDARG00000117058	misc_RNA	No
BX649423.3	ENSDARG00000117071	rRNA	No
CABZ01083778.2	ENSDARG00000117128	rRNA	No
BX928751.8	ENSDARG00000117129	snoRNA	No
CABZ01046950.1	ENSDARG00000117143	rRNA	No
AL772289.1	ENSDARG00000117147	rRNA	No
BX649431.4	ENSDARG00000117168	protein_coding	Yes
AL929286.1	ENSDARG00000117170	rRNA	No
taar10c	ENSDARG00000117173	protein_coding	Yes
CR450764.18	ENSDARG00000117197	misc_RNA	No
BX119314.2	ENSDARG00000117200	protein_coding	Yes
CR450785.24	ENSDARG00000117208	snRNA	No
