# Supplementary material for: An improved zebrafish transcriptome annotation for sensitive and comprehensive detection of cell type-specific genes
Source: eLife. 2020 Aug 24;9:e55792. doi: 10.7554/eLife.55792 (PMC7486121; doi:10.7554/eLife.55792)
Supplement: Figure 3—source data 4. — This table includes information regarding blastx hits against zebrafish and human proteins, matches with lincRNAs, number of exons per gene, and whether the novel locus was included in the V4.3 annotation. [file elife-55792-fig3-data4.xlsx]

## Sheet: Sheet1
chr	start	end	strand	LLgeneID	LLgeneAbbrev	DrBLASTall	HsBLASTall	Number Of Exons	lnc Match	In V4_3	Comment
chr1	1573043	1574082	+	LL0000032205	XLOC_000030	no Blast hit	no Blast hit	1	no	discard	single exon with low confidence or no Blast hit
chr1	3038893	3042592	+	LL0000032206	XLOC_000050	low confidence,NP_001025454.1,ldlra,low density lipoprotein receptor a	no Blast hit	1	no	discard	single exon with low confidence or no Blast hit
chr1	4554632	4556112	+	LL0000032207	XLOC_000055	low confidence,NP_571149.1,npy,neuropeptide Y	low confidence,NP_705900.1,CPNE7,copine-7 isoform a	1	no	discard	single exon with low confidence or no Blast hit
chr1	5280572	5283253	+	LL0000032208	XLOC_000058	low confidence,XP_017211226.1,LOC108183929,gastrula zinc finger protein XlCGF8.2DB-like	no Blast hit	1	no	discard	single exon with low confidence or no Blast hit
chr1	6673524	6674290	+	LL0000032209	XLOC_000069	low confidence,NP_001076369.1,taar10c,trace amine-associated receptor 10c	no Blast hit	1	no	discard	single exon with low confidence or no Blast hit
chr1	6683537	6685619	+	LL0000032210	XLOC_000070	low confidence,XP_021327923.1,LOC101885714,uncharacterized LOC101885714	low confidence,NP_001356717.1,SCN8A,sodium channel protein type 8 subunit alpha isoform 4	1	no	discard	single exon with low confidence or no Blast hit
chr1	6706751	6708800	+	LL0000032211	XLOC_000071	no Blast hit	no Blast hit	1	no	discard	single exon with low confidence or no Blast hit
chr1	6929127	6930243	+	LL0000032212	XLOC_000074	no Blast hit	no Blast hit	1	no	discard	single exon with low confidence or no Blast hit
chr1	8407713	8410273	+	LL0000032213	XLOC_000086	moderate confidence,NP_001106978.1,il23r,interleukin 23 receptor	low confidence,NP_001243508.2,LOC388813,putative uncharacterized protein ENSP00000383407	1	no	keep	high/moderate confidence zebrafish BLAST hit
chr1	9095704	9096945	+	LL0000032214	XLOC_000103	low confidence,XP_021324749.1,vsig10l2,V-set and immunoglobulin domain containing 10 like 2, transcript variant X1	no Blast hit	1	no	discard	single exon with low confidence or no Blast hit
chr1	9232960	9233993	+	LL0000032215	XLOC_000109	low confidence,NP_001116088.1,zgc:171435,zgc:171435	no Blast hit	1	no	discard	single exon with low confidence or no Blast hit
chr1	10701124	10702214	+	LL0000032216	XLOC_000132	low confidence,XP_021326442.1,LOC101887189,uncharacterized LOC101887189	no Blast hit	1	no	discard	single exon with low confidence or no Blast hit
chr1	12802512	12803176	+	LL0000032217	XLOC_000160	no Blast hit	no Blast hit	1	no	discard	single exon with low confidence or no Blast hit
chr1	17172252	17176031	+	LL0000032218	XLOC_000210	moderate confidence,NP_001164503.1,si:rp71-36n21.1,si:rp71-36n21.1	no Blast hit	1	no	keep	high/moderate confidence zebrafish BLAST hit
chr1	17186936	17187927	+	LL0000032219	XLOC_000211	low confidence,XP_021335606.1,LOC101886098,Fc receptor-like protein 5, transcript variant X5	no Blast hit	1	no	discard	single exon with low confidence or no Blast hit
chr1	17966903	17970146	+	LL0000032220	XLOC_000220	low confidence,XP_002663431.2,si:ch73-7i4.2,si:ch73-7i4.2	low confidence,XP_011539314.1,FGR,tyrosine-protein kinase Fgr isoform X3	10	no	discard	identified as duplicate with existing V4.2/RefSeq annotation
chr1	18141856	18145110	+	LL0000032221	XLOC_000221	no Blast hit	no Blast hit	1	no	discard	single exon with low confidence or no Blast hit
chr1	18156453	18157849	+	LL0000032222	XLOC_000222	low confidence,XP_021324890.1,si:dkey-71d15.2,si:dkey-71d15.2, transcript variant X3	no Blast hit	1	no	discard	single exon with low confidence or no Blast hit
chr1	18161773	18162877	+	LL0000032223	XLOC_000223	no Blast hit	no Blast hit	1	no	discard	single exon with low confidence or no Blast hit
chr1	18162992	18163946	+	LL0000032224	XLOC_000224	low confidence,XP_021325262.1,rabgap1l,RAB GTPase activating protein 1-like	no Blast hit	1	no	discard	single exon with low confidence or no Blast hit
chr1	18592352	18592423	+	LL0000032225	XLOC_000228	low confidence,NP_001006101.1,rad51c,RAD51 paralog C	low confidence,XP_016855991.1,DPH2,2-(3-amino-3-carboxypropyl)histidine synthase subunit 2 isoform X1	1	no	discard	single exon with low confidence or no Blast hit
chr1	18953813	18956196	+	LL0000032226	XLOC_000232	no Blast hit	no Blast hit	1	no	discard	single exon with low confidence or no Blast hit
chr1	24611372	24612586	+	LL0000032227	XLOC_000292	low confidence,NP_001038221.1,cmtm6,CKLF-like MARVEL transmembrane domain containing 6	no Blast hit	1	no	discard	single exon with low confidence or no Blast hit
chr1	24819980	24821861	+	LL0000032228	XLOC_000293	low confidence,XP_021330274.1,si:ch73-194h10.3,si:ch73-194h10.3	no Blast hit	2	no	keep	more than one exon
chr1	25550053	25553066	+	LL0000032229	XLOC_000298	low confidence,XP_002663431.2,si:ch73-7i4.2,si:ch73-7i4.2	no Blast hit	9	no	discard	identified as duplicate with existing V4.2/RefSeq annotation
chr1	27262069	27294841	+	LL0000032230	XLOC_000322	low confidence,XP_001341795.5,si:dkey-202l22.6,si:dkey-202l22.6, transcript variant X2	low confidence,XP_011524207.1,RTTN,rotatin isoform X10	2	no	keep	more than one exon
chr1	27296698	27298595	+	LL0000032231	XLOC_000323	low confidence,NP_001071220.1,zgc:123035,zgc:123035, transcript variant 2	no Blast hit	1	no	discard	single exon with low confidence or no Blast hit
chr1	27630697	27637054	+	LL0000032232	XLOC_000324	high confidence,XP_021329428.1,LOC110439125,uncharacterized LOC110439125	no Blast hit	1	no	keep	high/moderate confidence zebrafish BLAST hit
chr1	27637525	27638173	+	LL0000032233	XLOC_000325	low confidence,XP_017206832.1,LOC103909784,uncharacterized LOC103909784, transcript variant X2	low confidence,NP_001092759.1,SH3RF3,E3 ubiquitin-protein ligase SH3RF3 precursor	1	no	discard	single exon with low confidence or no Blast hit
chr1	27692603	27693562	+	LL0000032234	XLOC_000326	high confidence,XP_017206977.1,LOC103908925,uncharacterized LOC103908925	low confidence,XP_011535318.1,NYNRIN,protein NYNRIN isoform X1	1	no	keep	high/moderate confidence zebrafish BLAST hit
chr1	27944862	27945945	+	LL0000032235	XLOC_000331	no Blast hit	no Blast hit	1	no	discard	single exon with low confidence or no Blast hit
chr1	28262265	28263667	+	LL0000032236	XLOC_000335	low confidence,NP_001265728.1,lama2,laminin, alpha 2	no Blast hit	1	no	discard	single exon with low confidence or no Blast hit
chr1	28347117	28348126	+	LL0000032237	XLOC_000336	low confidence,XP_003201490.2,si:dkey-217l24.1,si:dkey-217l24.1, transcript variant X1	low confidence,NP_001036148.2,SHPRH,E3 ubiquitin-protein ligase SHPRH isoform a	1	no	discard	single exon with low confidence or no Blast hit
chr1	28388614	28389078	+	LL0000032238	XLOC_000337	low confidence,XP_021334746.1,ttn.1,titin, tandem duplicate 1, transcript variant X1	no Blast hit	1	no	discard	single exon with low confidence or no Blast hit
chr1	28585235	28585950	+	LL0000032239	XLOC_000339	moderate confidence,XP_017210988.1,LOC101886882,uncharacterized LOC101886882, transcript variant X1	moderate confidence,XP_016869645.1,LOC105379356,uncharacterized protein LOC105379356 isoform X2	1	no	keep	high/moderate confidence zebrafish BLAST hit
chr1	28634427	28635341	+	LL0000032240	XLOC_000340	low confidence,NP_001070987.1,plekhh1,pleckstrin homology domain containing, family H (with MyTH4 domain) member 1	low confidence,XP_016866818.1,VWA7,von Willebrand factor A domain-containing protein 7 isoform X2	2	no	discard	identified as duplicate with existing V4.2/RefSeq annotation
chr1	28693620	28694990	+	LL0000032241	XLOC_000341	moderate confidence,XP_005165376.1,antxr2a,anthrax toxin receptor 2a, transcript variant X1	no Blast hit	1	no	keep	high/moderate confidence zebrafish BLAST hit
chr1	28696942	28700674	+	LL0000032242	XLOC_000342	moderate confidence,XP_021331692.1,thy1,Thy-1 cell surface antigen, transcript variant X1	low confidence,NP_001273466.1,C2orf49,ashwin isoform 2	1	no	keep	high/moderate confidence zebrafish BLAST hit
chr1	28712088	28713333	+	LL0000032243	XLOC_000343	low confidence,XP_003200160.3,LOC100332535,uncharacterized LOC100332535	low confidence,NP_596867.1,ITGB1,integrin beta-1 isoform 1A precursor	1	no	discard	single exon with low confidence or no Blast hit
chr1	28714461	28716223	+	LL0000032244	XLOC_000344	no Blast hit	no Blast hit	1	no	discard	single exon with low confidence or no Blast hit
chr1	28716331	28717017	+	LL0000032245	XLOC_000345	low confidence,NP_775383.1,lamb4,laminin, beta 4	low confidence,NP_055632.2,TRIL,TLR4 interactor with leucine rich repeats precursor	1	no	discard	single exon with low confidence or no Blast hit
chr1	29433427	29434775	+	LL0000032246	XLOC_000357	moderate confidence,XP_021324159.1,LOC110438160,uncharacterized LOC110438160	low confidence,XP_016862710.1,NEK11,serine/threonine-protein kinase Nek11 isoform X6	1	no	keep	high/moderate confidence zebrafish BLAST hit
chr1	30074619	30081146	+	LL0000032247	XLOC_000367	high confidence,XP_021336451.1,LOC110440176,uncharacterized LOC110440176, transcript variant X2	no Blast hit	5	no	keep	high/moderate confidence zebrafish BLAST hit
chr1	30374798	30377343	+	LL0000032248	XLOC_000371	high confidence,XP_009302985.2,LOC103911649,uncharacterized LOC103911649	low confidence,XP_024302798.1,LOC112267992,uncharacterized protein LOC112267992	1	no	keep	high/moderate confidence zebrafish BLAST hit
chr1	31356725	31363621	+	LL0000032249	XLOC_000380	high confidence,XP_021333505.1,LOC108179166,uncharacterized LOC108179166, transcript variant X2	low confidence,XP_011533927.1,ZNF292,zinc finger protein 292 isoform X2	7	no	keep	high/moderate confidence zebrafish BLAST hit
chr1	31600749	31602185	+	LL0000032250	XLOC_000384	low confidence,XP_021322010.1,p4ha3,prolyl 4-hydroxylase, alpha polypeptide III, transcript variant X5	no Blast hit	1	no	discard	single exon with low confidence or no Blast hit
chr1	31701978	31703268	+	LL0000032251	XLOC_000388	no Blast hit	no Blast hit	1	no	discard	single exon with low confidence or no Blast hit
chr1	32079563	32081409	+	LL0000032252	XLOC_000396	low confidence,NP_001139404.1,acsl3b,acyl-CoA synthetase long-chain family member 3b	no Blast hit	1	no	discard	single exon with low confidence or no Blast hit
chr1	32473637	32474791	+	LL0000032253	XLOC_000398	low confidence,XP_021331061.1,LOC110439405,uncharacterized LOC110439405	no Blast hit	1	no	discard	single exon with low confidence or no Blast hit
chr1	33880071	33880621	+	LL0000032254	XLOC_000415	no Blast hit	no Blast hit	1	no	discard	single exon with low confidence or no Blast hit
chr1	35121888	35128314	+	LL0000032255	XLOC_000428	high confidence,XP_009300605.1,LOC103911210,uncharacterized LOC103911210	low confidence,NP_976048.1,ZCCHC13,zinc finger CCHC domain-containing protein 13	2	no	discard	identified as duplicate with existing V4.2/RefSeq annotation
chr1	35389383	35392972	+	LL0000032256	XLOC_000431	high confidence,XP_021327275.1,LOC103908724,uncharacterized LOC103908724	no Blast hit	1	no	keep	high/moderate confidence zebrafish BLAST hit
chr1	35978812	35983777	+	LL0000032257	XLOC_000439	moderate confidence,NP_001106978.1,il23r,interleukin 23 receptor	no Blast hit	1	no	keep	high/moderate confidence zebrafish BLAST hit
chr1	36443913	36444669	+	LL0000032258	XLOC_000444	no Blast hit	no Blast hit	1	no	discard	single exon with low confidence or no Blast hit
chr1	37183375	37187050	+	LL0000032259	XLOC_000449	high confidence,XP_021324313.1,ftr06,finTRIM family, member 6, transcript variant X1	high confidence,NP_001128360.1,RTL1,retrotransposon-like protein 1	3	no	keep	high/moderate confidence zebrafish BLAST hit
chr1	37625440	37626448	+	LL0000032260	XLOC_000454	low confidence,XP_009295341.1,tor1l2,torsin family 1 like 2, transcript variant X2	no Blast hit	1	no	discard	single exon with low confidence or no Blast hit
chr1	40522605	40524190	+	LL0000032261	XLOC_000486	low confidence,XP_021335606.1,LOC101886098,Fc receptor-like protein 5, transcript variant X5	no Blast hit	1	no	discard	single exon with low confidence or no Blast hit
chr1	40647751	40648500	+	LL0000032262	XLOC_000490	no Blast hit	no Blast hit	2	no	keep	more than one exon
chr1	41475373	41476713	+	LL0000032263	XLOC_000505	low confidence,NP_001025454.1,ldlra,low density lipoprotein receptor a	no Blast hit	1	no	discard	single exon with low confidence or no Blast hit
chr1	43953818	43958114	+	LL0000032264	XLOC_000523	low confidence,XP_017207609.1,zbtb38,zinc finger and BTB domain containing 38, transcript variant X4	low confidence,NP_001308072.1,CIDEC,cell death activator CIDE-3 isoform 4	20	no	keep	more than one exon
chr1	44038052	44039546	+	LL0000032265	XLOC_000525	low confidence,NP_001018332.1,zgc:113057,zgc:113057	no Blast hit	1	no	discard	single exon with low confidence or no Blast hit
chr1	44068686	44072284	+	LL0000032266	XLOC_000527	high confidence,XP_021332602.1,vwa11,von Willebrand factor A domain containing 11, transcript variant X2	no Blast hit	1	no	keep	high/moderate confidence zebrafish BLAST hit
chr1	45000577	45000648	+	LL0000032267	XLOC_000567	low confidence,NP_001005575.1,bcl9l,B-cell CLL/lymphoma 9-like	no Blast hit	1	no	discard	single exon with low confidence or no Blast hit
chr1	45001418	45001490	+	LL0000032268	XLOC_000568	low confidence,XP_021331059.1,LOC103910884,uncharacterized LOC103910884	no Blast hit	1	no	discard	single exon with low confidence or no Blast hit
chr1	45299405	45303707	+	LL0000032269	XLOC_000574	high confidence,XP_021332683.1,si:ch211-239f4.1,si:ch211-239f4.1, transcript variant X3	high confidence,XP_011517372.1,GFI1B,zinc finger protein Gfi-1b isoform X2	5	no	keep	high/moderate confidence zebrafish BLAST hit
chr1	45703647	45705986	+	LL0000032270	XLOC_000580	low confidence,NP_001139082.1,tmem176,transmembrane protein 176	no Blast hit	1	no	discard	single exon with low confidence or no Blast hit
chr1	46775531	46782563	+	LL0000032271	XLOC_000597	exact match,XP_021332828.1,LOC101884727,uncharacterized LOC101884727	low confidence,NP_059115.1,ASIC5,acid-sensing ion channel 5	2	no	keep	exact match BLAST hit with zebrafish protein
chr1	46783424	46785907	+	LL0000032272	XLOC_000598	high confidence,XP_009289536.1,si:ch211-276i12.9,si:ch211-276i12.9	no Blast hit	1	no	keep	high/moderate confidence zebrafish BLAST hit
chr1	46786323	46788715	+	LL0000032273	XLOC_000599	low confidence,NP_571394.1,opn1sw1,opsin 1 (cone pigments), short-wave-sensitive 1	low confidence,NP_001269594.1,MICAL2,[F-actin]-monooxygenase MICAL2 isoform c	1	no	discard	single exon with low confidence or no Blast hit
chr1	47239093	47241576	+	LL0000032274	XLOC_000606	no Blast hit	no Blast hit	1	no	discard	single exon with low confidence or no Blast hit
chr1	48492930	48493825	+	LL0000032275	XLOC_000617	no Blast hit	no Blast hit	1	no	discard	single exon with low confidence or no Blast hit
chr1	48494810	48496778	+	LL0000032276	XLOC_000618	low confidence,XP_021335605.1,LOC101886098,Fc receptor-like protein 5, transcript variant X2	no Blast hit	1	no	discard	single exon with low confidence or no Blast hit
chr1	48711547	48712355	+	LL0000032277	XLOC_000619	low confidence,XP_005169676.1,nocta,nocturnin a, transcript variant X2	no Blast hit	5	no	discard	identified as duplicate with existing V4.2/RefSeq annotation
chr1	50559060	50562403	+	LL0000032278	XLOC_000638	low confidence,NP_001025454.1,ldlra,low density lipoprotein receptor a	low confidence,XP_016871671.1,MALRD1,MAM and LDL-receptor class A domain-containing protein 1 isoform X4	1	no	discard	single exon with low confidence or no Blast hit
chr1	51380694	51382594	+	LL0000032279	XLOC_000651	no Blast hit	no Blast hit	1	no	discard	single exon with low confidence or no Blast hit
chr1	52335500	52352791	+	LL0000032280	XLOC_000666	moderate confidence,XP_021333688.1,LOC108185957,mucin-2-like	no Blast hit	23	no	keep	high/moderate confidence zebrafish BLAST hit
chr1	52364636	52371912	+	LL0000032281	XLOC_000667	high confidence,XP_021333688.1,LOC108185957,mucin-2-like	no Blast hit	6	no	keep	high/moderate confidence zebrafish BLAST hit
chr1	52630910	52630981	+	LL0000032282	XLOC_000674	low confidence,XP_002665106.3,nod1,nucleotide-binding oligomerization domain containing 1	low confidence,NP_002528.1,OAZ2,ornithine decarboxylase antizyme 2 isoform 1	1	no	discard	single exon with low confidence or no Blast hit
chr1	53302549	53305257	+	LL0000032283	XLOC_000686	no Blast hit	no Blast hit	1	no	discard	single exon with low confidence or no Blast hit
chr1	53447111	53449086	+	LL0000032284	XLOC_000690	low confidence,XP_021323685.1,si:ch211-66k16.2,si:ch211-66k16.2	no Blast hit	1	no	discard	single exon with low confidence or no Blast hit
chr1	53686328	53686664	+	LL0000032285	XLOC_000693	no Blast hit	no Blast hit	1	no	discard	single exon with low confidence or no Blast hit
chr1	53782094	53785161	+	LL0000032286	XLOC_000695	low confidence,XP_021322720.1,LOC110438007,fap1 adhesin-like	no Blast hit	3	no	keep	more than one exon
chr1	54491231	54497948	+	LL0000032287	XLOC_000711	no Blast hit	no Blast hit	1	no	discard	single exon with low confidence or no Blast hit
chr1	54501087	54502716	+	LL0000032288	XLOC_000712	no Blast hit	no Blast hit	1	no	discard	single exon with low confidence or no Blast hit
chr1	56925178	56927767	+	LL0000032289	XLOC_000787	low confidence,XP_021328859.1,grid1a,glutamate receptor, ionotropic, delta 1a, transcript variant X4	no Blast hit	1	no	discard	single exon with low confidence or no Blast hit
chr1	57344576	57345995	+	LL0000032290	XLOC_000809	no Blast hit	no Blast hit	1	no	discard	single exon with low confidence or no Blast hit
chr1	57645177	57649370	+	LL0000032291	XLOC_000817	high confidence,XP_005158326.1,clasp1b,cytoplasmic linker associated protein 1b	moderate confidence,NP_001128360.1,RTL1,retrotransposon-like protein 1	1	no	keep	high/moderate confidence zebrafish BLAST hit
chr1	57794888	57799451	+	LL0000032292	XLOC_000828	high confidence,XP_009293901.1,LOC101882159,polymeric immunoglobulin receptor-like, transcript variant X2	moderate confidence,NP_001276011.1,CD300LF,CMRF35-like molecule 1 isoform 2	4	no	discard	identified as duplicate with existing V4.2/RefSeq annotation
chr1	58682502	58685468	+	LL0000032293	XLOC_000879	low confidence,XP_005170414.1,zgc:171435,zgc:171435, transcript variant X2	low confidence,NP_001275879.1,ASTE1,protein asteroid homolog 1 isoform 1	2	no	keep	more than one exon
chr1	58687487	58688927	+	LL0000032294	XLOC_000880	low confidence,XP_021335606.1,LOC101886098,Fc receptor-like protein 5, transcript variant X5	no Blast hit	1	no	discard	single exon with low confidence or no Blast hit
chr1	58698983	58712942	+	LL0000032295	XLOC_000881	exact match,XP_002660670.3,si:ch211-236p5.3,si:ch211-236p5.3, transcript variant X3	high confidence,XP_016878528.1,NLRC3,NLR family CARD domain-containing protein 3 isoform X4	8	no	discard	identified as duplicate with existing V4.2/RefSeq annotation
chr1	58779744	58782116	+	LL0000032296	XLOC_000885	low confidence,XP_021332399.1,cita,citron rho-interacting serine/threonine kinase a, transcript variant X2	low confidence,XP_011535984.1,PCYOX1L,prenylcysteine oxidase-like isoform X2	1	no	discard	single exon with low confidence or no Blast hit
chr1	59033333	59038037	+	LL0000032297	XLOC_000895	low confidence,XP_021326442.1,LOC101887189,uncharacterized LOC101887189	no Blast hit	1	no	discard	single exon with low confidence or no Blast hit
chr1	59120417	59120616	+	LL0000032298	XLOC_000900	low confidence,XP_002662346.1,si:dkey-34m19.3,si:dkey-34m19.3, transcript variant X1	low confidence,NP_803237.3,FAM171B,protein FAM171B precursor	1	no	discard	single exon with low confidence or no Blast hit
chr1	59327540	59327793	+	LL0000032299	XLOC_000906	no Blast hit	low confidence,XP_011522251.1,XAF1,XIAP-associated factor 1 isoform X5	1	no	discard	single exon with low confidence or no Blast hit
chr1	59577024	59577927	+	LL0000032300	XLOC_000910	low confidence,XP_009304608.1,tmc8,transmembrane channel-like 8	low confidence,NP_001153836.1,TMC7,transmembrane channel-like protein 7 isoform b	2	no	keep	more than one exon
chr1	733180	733336	-	LL0000032301	XLOC_000935	low confidence,NP_001129452.1,zgc:194285,zgc:194285	no Blast hit	1	no	discard	single exon with low confidence or no Blast hit
chr1	1005938	1014803	-	LL0000032302	XLOC_000936	matches or overlaps with known lincRNA	low confidence,NP_001310993.1,MIA3,transport and Golgi organization protein 1 homolog isoform 5	5	yes	keep	maps to previously identified lincRNA
chr1	1358604	1360511	-	LL0000032303	XLOC_000941	moderate confidence,NP_001106978.1,il23r,interleukin 23 receptor	low confidence,NP_001310884.1,DYNC1LI2,cytoplasmic dynein 1 light intermediate chain 2 isoform 3	1	no	keep	high/moderate confidence zebrafish BLAST hit
chr1	1571066	1571353	-	LL0000032304	XLOC_000943	low confidence,XP_021335891.1,arhgap27,Rho GTPase activating protein 27, transcript variant X3	no Blast hit	1	no	discard	single exon with low confidence or no Blast hit
chr1	1593044	1593341	-	LL0000032305	XLOC_000944	low confidence,NP_001025454.1,ldlra,low density lipoprotein receptor a	no Blast hit	1	no	discard	single exon with low confidence or no Blast hit
chr1	1850167	1854174	-	LL0000032306	XLOC_000946	low confidence,NP_001106978.1,il23r,interleukin 23 receptor	no Blast hit	2	no	keep	more than one exon
chr1	1855782	1856469	-	LL0000032307	XLOC_000947	low confidence,XP_693283.4,cers6,ceramide synthase 6	low confidence,NP_001138637.1,DOHH,deoxyhypusine hydroxylase	2	no	keep	more than one exon
chr1	3066969	3067365	-	LL0000032308	XLOC_000956	low confidence,XP_017212271.1,htr2cl1,5-hydroxytryptamine (serotonin) receptor 2C, G protein-coupled-like 1, transcript variant X1	low confidence,XP_016880230.1,PECAM1,platelet endothelial cell adhesion molecule isoform X7	1	no	discard	single exon with low confidence or no Blast hit
chr1	3844827	3846804	-	LL0000032309	XLOC_000965	no Blast hit	no Blast hit	1	no	discard	single exon with low confidence or no Blast hit
chr1	4783348	4785445	-	LL0000032310	XLOC_000968	low confidence,XP_021326220.1,LOC101882374,uncharacterized LOC101882374	no Blast hit	4	no	discard	identified as duplicate with existing V4.2/RefSeq annotation
chr1	5288386	5288658	-	LL0000032311	XLOC_000971	low confidence,XP_021327558.1,trip6,thyroid hormone receptor interactor 6, transcript variant X6	low confidence,NP_060204.1,PALMD,palmdelphin	1	no	discard	single exon with low confidence or no Blast hit
chr1	7900665	7905612	-	LL0000032312	XLOC_000990	low confidence,XP_021333058.1,LOC101883618,uncharacterized protein PF11_0213-like	no Blast hit	1	no	discard	single exon with low confidence or no Blast hit
chr1	11771897	11772946	-	LL0000032313	XLOC_001062	low confidence,NP_001106978.1,il23r,interleukin 23 receptor	no Blast hit	1	no	discard	single exon with low confidence or no Blast hit
chr1	13997809	14015104	-	LL0000032314	XLOC_001083	exact match,XP_003197682.1,mgarp,mitochondria-localized glutamic acid-rich protein, transcript variant X2	low confidence,NP_116012.2,MGARP,protein MGARP	13	no	discard	identified as duplicate with existing V4.2/RefSeq annotation
chr1	14002117	14004033	-	LL0000032315	XLOC_001084	no Blast hit	no Blast hit	1	no	discard	single exon with low confidence or no Blast hit
chr1	14663471	14669517	-	LL0000032316	XLOC_001102	high confidence,XP_017211461.1,LOC100004978,uncharacterized LOC100004978, transcript variant X2	no Blast hit	6	no	keep	high/moderate confidence zebrafish BLAST hit
chr1	15288187	15290504	-	LL0000032317	XLOC_001104	low confidence,XP_695016.2,LOC566646,uncharacterized LOC566646, transcript variant X1	no Blast hit	1	no	discard	single exon with low confidence or no Blast hit
chr1	15618813	15620119	-	LL0000032318	XLOC_001106	low confidence,XP_021335881.1,LOC108191691,slit homolog 2 protein-like, transcript variant X2	no Blast hit	1	no	discard	single exon with low confidence or no Blast hit
chr1	15919866	15923310	-	LL0000032319	XLOC_001107	low confidence,NP_001106978.1,il23r,interleukin 23 receptor	no Blast hit	1	no	discard	single exon with low confidence or no Blast hit
chr1	15943307	15944916	-	LL0000032320	XLOC_001108	no Blast hit	no Blast hit	1	no	discard	single exon with low confidence or no Blast hit
chr1	15953423	15955549	-	LL0000032321	XLOC_001109	no Blast hit	no Blast hit	1	no	discard	single exon with low confidence or no Blast hit
chr1	15955721	15956584	-	LL0000032322	XLOC_001110	low confidence,XP_009304440.1,thsd7bb,thrombospondin, type I, domain containing 7Bb	no Blast hit	1	no	discard	single exon with low confidence or no Blast hit
chr1	15958172	15959887	-	LL0000032323	XLOC_001111	low confidence,XP_021335606.1,LOC101886098,Fc receptor-like protein 5, transcript variant X5	no Blast hit	1	no	discard	single exon with low confidence or no Blast hit
chr1	15982442	15983753	-	LL0000032324	XLOC_001112	low confidence,XP_005170414.1,zgc:171435,zgc:171435, transcript variant X2	no Blast hit	1	no	discard	single exon with low confidence or no Blast hit
chr1	15995727	15997982	-	LL0000032325	XLOC_001113	high confidence,NP_001129452.1,zgc:194285,zgc:194285	no Blast hit	1	no	keep	high/moderate confidence zebrafish BLAST hit
chr1	16024478	16026265	-	LL0000032326	XLOC_001114	low confidence,NP_001025454.1,ldlra,low density lipoprotein receptor a	no Blast hit	1	no	discard	single exon with low confidence or no Blast hit
chr1	16026367	16031307	-	LL0000032327	XLOC_001115	moderate confidence,NP_001106978.1,il23r,interleukin 23 receptor	no Blast hit	1	no	keep	high/moderate confidence zebrafish BLAST hit
chr1	16040847	16042379	-	LL0000032328	XLOC_001116	no Blast hit	no Blast hit	1	no	discard	single exon with low confidence or no Blast hit
chr1	16045667	16047793	-	LL0000032329	XLOC_001117	no Blast hit	no Blast hit	1	no	discard	single exon with low confidence or no Blast hit
chr1	16843334	16845319	-	LL0000032330	XLOC_001124	low confidence,XP_021333992.1,fam160b2,family with sequence similarity 160, member B2, transcript variant X2	no Blast hit	1	no	discard	single exon with low confidence or no Blast hit
chr1	17227217	17228730	-	LL0000032331	XLOC_001132	low confidence,NP_001315129.1,si:dkey-77f5.3,si:dkey-77f5.3	low confidence,NP_001307607.1,SETMAR,histone-lysine N-methyltransferase SETMAR isoform 7	1	no	discard	single exon with low confidence or no Blast hit
chr1	18171714	18174990	-	LL0000032332	XLOC_001144	low confidence,XP_021324770.1,si:dkey-29d5.2,si:dkey-29d5.2	no Blast hit	7	no	discard	identified as duplicate with existing V4.2/RefSeq annotation
chr1	18949430	18951446	-	LL0000032333	XLOC_001155	moderate confidence,XP_001344635.2,LOC100005637,uncharacterized LOC100005637	no Blast hit	3	no	keep	high/moderate confidence zebrafish BLAST hit
chr1	21232735	21234520	-	LL0000032334	XLOC_001185	no Blast hit	no Blast hit	1	no	discard	single exon with low confidence or no Blast hit
chr1	21234630	21237557	-	LL0000032335	XLOC_001186	no Blast hit	no Blast hit	1	no	discard	single exon with low confidence or no Blast hit
chr1	22840209	22841184	-	LL0000032336	XLOC_001211	no Blast hit	no Blast hit	1	no	discard	single exon with low confidence or no Blast hit
chr1	23462519	23462591	-	LL0000032337	XLOC_001220	low confidence,NP_001025245.2,kcnk6,potassium channel, subfamily K, member 6	low confidence,NP_057291.1,CPSF3,cleavage and polyadenylation specificity factor subunit 3 isoform a	1	no	discard	single exon with low confidence or no Blast hit
chr1	23463463	23463535	-	LL0000032338	XLOC_001221	low confidence,XP_021329039.1,si:dkey-12h9.6,si:dkey-12h9.6, transcript variant X1	low confidence,NP_115876.3,ACTRT3,actin-related protein T3	1	no	discard	single exon with low confidence or no Blast hit
chr1	23464172	23464244	-	LL0000032339	XLOC_001222	low confidence,XP_021331226.1,LOC110439489,uncharacterized LOC110439489	no Blast hit	1	no	discard	single exon with low confidence or no Blast hit
chr1	23466627	23466699	-	LL0000032340	XLOC_001224	low confidence,NP_001007330.2,slc7a3a,solute carrier family 7 (cationic amino acid transporter, y+ system), member 3a	low confidence,NP_001334651.1,DYRK1A,dual specificity tyrosine-phosphorylation-regulated kinase 1A isoform 2	1	no	discard	single exon with low confidence or no Blast hit
chr1	23471565	23471637	-	LL0000032341	XLOC_001229	low confidence,XP_021329039.1,si:dkey-12h9.6,si:dkey-12h9.6, transcript variant X1	no Blast hit	1	no	discard	single exon with low confidence or no Blast hit
chr1	23476098	23476170	-	LL0000032342	XLOC_001234	low confidence,NP_001003836.1,cpsf3,cleavage and polyadenylation specific factor 3	no Blast hit	1	no	discard	single exon with low confidence or no Blast hit
chr1	23476944	23477016	-	LL0000032343	XLOC_001235	low confidence,NP_001038409.1,jtb,jumping translocation breakpoint	low confidence,NP_005064.1,SLC15A1,solute carrier family 15 member 1	1	no	discard	single exon with low confidence or no Blast hit
chr1	24602557	24605806	-	LL0000032344	XLOC_001245	low confidence,XP_021332294.1,LOC110439826,uncharacterized LOC110439826	no Blast hit	11	no	discard	identified as duplicate with existing V4.2/RefSeq annotation
chr1	24664968	24665500	-	LL0000032345	XLOC_001246	no Blast hit	low confidence,NP_001243329.2,BCO2,beta,beta-carotene 9',10'-oxygenase isoform e	1	no	discard	single exon with low confidence or no Blast hit
chr1	24723569	24727978	-	LL0000032346	XLOC_001247	high confidence,XP_003199161.1,LOC100535543,uncharacterized protein K02A2.6-like	moderate confidence,NP_001128360.1,RTL1,retrotransposon-like protein 1	1	no	keep	high/moderate confidence zebrafish BLAST hit
chr1	25713490	25714906	-	LL0000032347	XLOC_001259	high confidence,XP_021332189.1,LOC100537259,uncharacterized LOC100537259, transcript variant X2	low confidence,NP_055294.1,ADAMDEC1,ADAM DEC1 isoform 1 precursor	5	no	discard	identified as duplicate with existing V4.2/RefSeq annotation
chr1	27442862	27443218	-	LL0000032348	XLOC_001282	low confidence,NP_001232918.1,gig2l,grass carp reovirus (GCRV)-induced gene 2l	low confidence,NP_056277.2,NOL11,nucleolar protein 11 isoform 1	1	no	discard	single exon with low confidence or no Blast hit
chr1	27468638	27494859	-	LL0000032349	XLOC_001283	high confidence,XP_009289804.2,LOC103908810,uncharacterized LOC103908810	no Blast hit	6	no	keep	high/moderate confidence zebrafish BLAST hit
chr1	27471397	27472841	-	LL0000032350	XLOC_001284	low confidence,XP_021333689.1,zmp:0000000660,zmp:0000000660, transcript variant X3	low confidence,XP_024306066.1,PKD1,polycystin-1 isoform X1	1	no	discard	single exon with low confidence or no Blast hit
chr1	27495595	27495935	-	LL0000032351	XLOC_001285	no Blast hit	no Blast hit	1	no	discard	single exon with low confidence or no Blast hit
chr1	27496034	27496523	-	LL0000032352	XLOC_001286	low confidence,XP_017206832.1,LOC103909784,uncharacterized LOC103909784, transcript variant X2	low confidence,NP_775112.1,CAPN3,calpain-3 isoform e	1	no	discard	single exon with low confidence or no Blast hit
chr1	27680867	27681705	-	LL0000032353	XLOC_001288	low confidence,XP_009296319.1,si:dkey-217l24.1,si:dkey-217l24.1, transcript variant X2	no Blast hit	1	no	discard	single exon with low confidence or no Blast hit
chr1	28248584	28249152	-	LL0000032354	XLOC_001292	low confidence,XP_701235.5,hace1,HECT domain and ankyrin repeat containing E3 ubiquitin protein ligase 1	low confidence,NP_001337484.1,HACE1,E3 ubiquitin-protein ligase HACE1 isoform f	1	no	discard	single exon with low confidence or no Blast hit
chr1	28324971	28327724	-	LL0000032355	XLOC_001294	no Blast hit	low confidence,NP_001155000.1,LRRD1,leucine-rich repeat and death domain-containing protein 1	2	no	keep	more than one exon
chr1	28546790	28562456	-	LL0000032356	XLOC_001298	low confidence,XP_009301132.1,si:dkey-81n2.2,si:dkey-81n2.2, transcript variant X1	no Blast hit	3	no	keep	more than one exon
chr1	28578831	28580210	-	LL0000032357	XLOC_001300	no Blast hit	low confidence,XP_005246098.1,THEMIS2,protein THEMIS2 isoform X2	1	no	discard	single exon with low confidence or no Blast hit
chr1	28618610	28620307	-	LL0000032358	XLOC_001302	no Blast hit	no Blast hit	1	no	discard	single exon with low confidence or no Blast hit
chr1	28862857	28864667	-	LL0000032359	XLOC_001307	low confidence,XP_001923018.1,nup188,nucleoporin 188	no Blast hit	1	no	discard	single exon with low confidence or no Blast hit
chr1	28867573	28869648	-	LL0000032360	XLOC_001308	no Blast hit	no Blast hit	1	no	discard	single exon with low confidence or no Blast hit
chr1	29054808	29056161	-	LL0000032361	XLOC_001312	low confidence,XP_021327561.1,chd3,chromodomain helicase DNA binding protein 3, transcript variant X5	low confidence,NP_659476.2,CENPBD1,CENPB DNA-binding domain-containing protein 1	1	no	discard	single exon with low confidence or no Blast hit
chr1	29526075	29528720	-	LL0000032362	XLOC_001318	moderate confidence,XP_005174219.2,wu:fb74b10,wu:fb74b10	no Blast hit	4	no	keep	high/moderate confidence zebrafish BLAST hit
chr1	31701979	31703265	-	LL0000032363	XLOC_001343	no Blast hit	no Blast hit	1	no	discard	single exon with low confidence or no Blast hit
chr1	32953142	32953641	-	LL0000032364	XLOC_001348	no Blast hit	no Blast hit	1	no	discard	single exon with low confidence or no Blast hit
chr1	33193995	33195424	-	LL0000032365	XLOC_001350	low confidence,XP_021326442.1,LOC101887189,uncharacterized LOC101887189	no Blast hit	1	no	discard	single exon with low confidence or no Blast hit
chr1	33543431	33544837	-	LL0000032366	XLOC_001352	moderate confidence,XP_021335606.1,LOC101886098,Fc receptor-like protein 5, transcript variant X5	no Blast hit	1	no	keep	high/moderate confidence zebrafish BLAST hit
chr1	33723375	33723666	-	LL0000032367	XLOC_001355	no Blast hit	no Blast hit	1	no	discard	single exon with low confidence or no Blast hit
chr1	34728593	34730050	-	LL0000032368	XLOC_001364	high confidence,XP_021323770.1,si:ch211-209f23.6,si:ch211-209f23.6, transcript variant X3	no Blast hit	2	no	keep	high/moderate confidence zebrafish BLAST hit
chr1	35144071	35144804	-	LL0000032369	XLOC_001368	no Blast hit	no Blast hit	1	no	discard	single exon with low confidence or no Blast hit
chr1	35180509	35182364	-	LL0000032370	XLOC_001370	low confidence,NP_001229967.1,creb3l1,cAMP responsive element binding protein 3-like 1	no Blast hit	6	no	discard	identified as duplicate with existing V4.2/RefSeq annotation
chr1	35309687	35310141	-	LL0000032371	XLOC_001371	no Blast hit	no Blast hit	1	no	discard	single exon with low confidence or no Blast hit
chr1	35386396	35387492	-	LL0000032372	XLOC_001374	high confidence,XP_021333404.1,nitr3r.1l,novel immune-type receptor 3, related 1-like, transcript variant X1	low confidence,NP_000441.2,SELE,E-selectin precursor	2	no	keep	high/moderate confidence zebrafish BLAST hit
chr1	35398378	35401308	-	LL0000032373	XLOC_001375	high confidence,XP_021333404.1,nitr3r.1l,novel immune-type receptor 3, related 1-like, transcript variant X1	low confidence,NP_001182570.1,PLA2R1,secretory phospholipase A2 receptor isoform 3 precursor	2	no	keep	high/moderate confidence zebrafish BLAST hit
chr1	36928494	36931978	-	LL0000032374	XLOC_001388	no Blast hit	low confidence,XP_005249299.1,MRS2,magnesium transporter MRS2 homolog, mitochondrial isoform X1	1	no	discard	single exon with low confidence or no Blast hit
chr1	37540423	37540826	-	LL0000032375	XLOC_001392	low confidence,XP_009303477.1,apbb1,amyloid beta (A4) precursor protein-binding, family B, member 1 (Fe65), transcript variant X3	no Blast hit	1	no	discard	single exon with low confidence or no Blast hit
chr1	40092225	40094295	-	LL0000032376	XLOC_001412	moderate confidence,NP_001106978.1,il23r,interleukin 23 receptor	no Blast hit	2	no	keep	high/moderate confidence zebrafish BLAST hit
chr1	41465264	41465335	-	LL0000032377	XLOC_001427	low confidence,NP_001077034.2,hip1rb,huntingtin interacting protein 1 related b	low confidence,XP_011518496.1,ZDHHC13,palmitoyltransferase ZDHHC13 isoform X2	1	no	discard	single exon with low confidence or no Blast hit
chr1	41950880	41952281	-	LL0000032378	XLOC_001430	moderate confidence,NP_001025454.1,ldlra,low density lipoprotein receptor a	no Blast hit	1	no	keep	high/moderate confidence zebrafish BLAST hit
chr1	43518254	43617126	-	LL0000032379	XLOC_001437	no Blast hit	no Blast hit	3	no	keep	more than one exon
chr1	43779715	43781225	-	LL0000032380	XLOC_001441	low confidence,XP_021332171.1,dchs2,dachsous cadherin-related 2, transcript variant X2	no Blast hit	1	no	discard	single exon with low confidence or no Blast hit
chr1	43781328	43782895	-	LL0000032381	XLOC_001442	low confidence,XP_009295419.2,zgc:158659,zgc:158659, transcript variant X2	no Blast hit	1	no	discard	single exon with low confidence or no Blast hit
chr1	45199776	45202769	-	LL0000032382	XLOC_001482	moderate confidence,NP_001106978.1,il23r,interleukin 23 receptor	no Blast hit	1	no	keep	high/moderate confidence zebrafish BLAST hit
chr1	47175698	47177262	-	LL0000032383	XLOC_001518	low confidence,XP_021335606.1,LOC101886098,Fc receptor-like protein 5, transcript variant X5	no Blast hit	1	no	discard	single exon with low confidence or no Blast hit
chr1	50957080	50957547	-	LL0000032384	XLOC_001550	low confidence,NP_001352084.1,ecpas,proteasome-associated protein ECM29 homolog isoform 2	no Blast hit	1	no	discard	single exon with low confidence or no Blast hit
chr1	51043300	51045904	-	LL0000032385	XLOC_001552	no Blast hit	no Blast hit	1	no	discard	single exon with low confidence or no Blast hit
chr1	51062575	51066218	-	LL0000032386	XLOC_001554	low confidence,NP_001106978.1,il23r,interleukin 23 receptor	no Blast hit	1	no	discard	single exon with low confidence or no Blast hit
chr1	51273676	51274569	-	LL0000032387	XLOC_001559	no Blast hit	low confidence,NP_031391.2,PADI2,protein-arginine deiminase type-2	1	no	discard	single exon with low confidence or no Blast hit
chr1	52736533	52736592	-	LL0000032388	XLOC_001586	low confidence,NP_001082989.1,mfsd4b,major facilitator superfamily domain containing 4B	no Blast hit	1	no	discard	single exon with low confidence or no Blast hit
chr1	53792310	53793748	-	LL0000032389	XLOC_001600	high confidence,XP_021323077.1,cuzd1.1,CUB and zona pellucida-like domains 1, tandem duplicate 1	low confidence,XP_016864593.1,TMEM161B,transmembrane protein 161B isoform X12	1	no	keep	high/moderate confidence zebrafish BLAST hit
chr1	53794617	53796806	-	LL0000032390	XLOC_001601	high confidence,XP_021323077.1,cuzd1.1,CUB and zona pellucida-like domains 1, tandem duplicate 1	moderate confidence,NP_001128360.1,RTL1,retrotransposon-like protein 1	1	no	keep	high/moderate confidence zebrafish BLAST hit
chr1	53806685	53812076	-	LL0000032391	XLOC_001602	low confidence,XP_002667598.5,LOC100334014,prolyl endopeptidase-like	low confidence,NP_001355092.1,SMIM28,small integral membrane protein 28	2	no	keep	more than one exon
chr1	53816754	53821410	-	LL0000032392	XLOC_001603	low confidence,XP_003200160.3,LOC100332535,uncharacterized LOC100332535	no Blast hit	3	no	keep	more than one exon
chr1	55211713	55212390	-	LL0000032393	XLOC_001632	low confidence,XP_005174272.1,si:ch1073-385f13.3,si:ch1073-385f13.3	no Blast hit	1	no	discard	single exon with low confidence or no Blast hit
chr1	55212616	55213023	-	LL0000032394	XLOC_001633	no Blast hit	no Blast hit	1	no	discard	single exon with low confidence or no Blast hit
chr1	55337216	55338672	-	LL0000032395	XLOC_001638	moderate confidence,XP_021331018.1,LOC110439387,gastrula zinc finger protein XlCGF28.1-like	low confidence,NP_001295.2,CPD,carboxypeptidase D isoform 1 precursor	1	no	keep	high/moderate confidence zebrafish BLAST hit
chr1	55685981	55687227	-	LL0000032396	XLOC_001639	high confidence,XP_021333208.1,adgre15,adhesion G protein-coupled receptor E15, transcript variant X3	low confidence,NP_001276087.1,ADGRE3,adhesion G protein-coupled receptor E3 isoform 2 precursor	1	no	keep	high/moderate confidence zebrafish BLAST hit
chr1	56339751	56341869	-	LL0000032397	XLOC_001661	moderate confidence,NP_001106978.1,il23r,interleukin 23 receptor	low confidence,XP_024303437.1,SECISBP2,selenocysteine insertion sequence-binding protein 2 isoform X9	1	no	keep	high/moderate confidence zebrafish BLAST hit
chr1	56441100	56442192	-	LL0000032398	XLOC_001666	no Blast hit	low confidence,NP_001306126.1,S100A8,protein S100-A8 isoform b	1	no	discard	single exon with low confidence or no Blast hit
chr1	56561160	56562552	-	LL0000032399	XLOC_001672	low confidence,XP_009292205.2,LOC100329768,G-protein coupled receptor 20-like	no Blast hit	1	no	discard	single exon with low confidence or no Blast hit
chr1	56562816	56567503	-	LL0000032400	XLOC_001673	high confidence,XP_021333260.1,LOC100538177,uncharacterized protein DDB_G0290685-like, transcript variant X5	low confidence,XP_016866550.1,DUSP22,dual specificity protein phosphatase 22 isoform X1	9	no	keep	high/moderate confidence zebrafish BLAST hit
chr1	56605868	56606010	-	LL0000032401	XLOC_001676	low confidence,XP_021333254.1,LOC100538177,uncharacterized protein DDB_G0290685-like, transcript variant X3	low confidence,XP_011529033.1,PPP6R2,serine/threonine-protein phosphatase 6 regulatory subunit 2 isoform X13	1	no	discard	single exon with low confidence or no Blast hit
chr1	56939346	56940148	-	LL0000032402	XLOC_001683	high confidence,XP_001332092.1,rac1l,ras-related C3 botulinum toxin substrate 1 (rho family, small GTP binding protein Rac1) like	high confidence,NP_008839.2,RAC1,ras-related C3 botulinum toxin substrate 1 isoform Rac1	1	no	keep	high/moderate confidence zebrafish BLAST hit
chr1	56997075	56998933	-	LL0000032403	XLOC_001686	high confidence,XP_021333311.1,si:ch211-1f22.12,si:ch211-1f22.12	low confidence,NP_001172029.1,CD22,B-cell receptor CD22 isoform 3 precursor	2	no	keep	high/moderate confidence zebrafish BLAST hit
chr1	57502743	57505697	-	LL0000032404	XLOC_001700	low confidence,NP_001003597.1,mnd1,meiotic nuclear divisions 1 homolog (S. cerevisiae)	no Blast hit	1	no	discard	single exon with low confidence or no Blast hit
chr1	57506766	57516645	-	LL0000032405	XLOC_001701	no Blast hit	no Blast hit	5	no	keep	more than one exon
chr1	57639106	57643750	-	LL0000032406	XLOC_001707	high confidence,XP_021333417.1,zmp:0000001289,zmp:0000001289	moderate confidence,XP_011525292.1,CEACAM6,carcinoembryonic antigen-related cell adhesion molecule 6 isoform X1	7	no	keep	high/moderate confidence zebrafish BLAST hit
chr1	58277038	58278378	-	LL0000032407	XLOC_001717	low confidence,XP_005158636.1,ptk2ba,protein tyrosine kinase 2 beta, a, transcript variant X3	no Blast hit	1	no	discard	single exon with low confidence or no Blast hit
chr1	58853360	58854377	-	LL0000032408	XLOC_001728	no Blast hit	no Blast hit	1	no	discard	single exon with low confidence or no Blast hit
chr1	58946977	58947496	-	LL0000032409	XLOC_001733	no Blast hit	no Blast hit	1	no	discard	single exon with low confidence or no Blast hit
chr1	59042506	59046616	-	LL0000032410	XLOC_001741	low confidence,XP_017208200.1,adgrg11,adhesion G protein-coupled receptor G11, transcript variant X1	low confidence,NP_997247.2,GPR148,probable G-protein coupled receptor 148	2	no	keep	more than one exon
chr1	59047529	59049683	-	LL0000032411	XLOC_001742	high confidence,XP_017214605.1,LOC108192163,uncharacterized LOC108192163	no Blast hit	1	no	keep	high/moderate confidence zebrafish BLAST hit
chr1	59054643	59055121	-	LL0000032412	XLOC_001744	low confidence,XP_017207383.1,ugt5f1,UDP glucuronosyltransferase 5 family, polypeptide F1, transcript variant X1	no Blast hit	1	no	discard	single exon with low confidence or no Blast hit
chr1	59057145	59058518	-	LL0000032413	XLOC_001745	low confidence,XP_021326683.1,LOC110438488,uncharacterized LOC110438488	low confidence,NP_077268.1,UBL5,ubiquitin-like protein 5	1	no	discard	single exon with low confidence or no Blast hit
chr1	59058643	59058981	-	LL0000032414	XLOC_001746	no Blast hit	no Blast hit	1	no	discard	single exon with low confidence or no Blast hit
chr1	59499660	59500987	-	LL0000032415	XLOC_001767	high confidence,XP_021326917.1,LOC110438578,mucin-5AC-like	no Blast hit	1	no	keep	high/moderate confidence zebrafish BLAST hit
chr1	59501064	59502389	-	LL0000032416	XLOC_001768	high confidence,XP_021326917.1,LOC110438578,mucin-5AC-like	no Blast hit	1	no	keep	high/moderate confidence zebrafish BLAST hit
chr1	59551890	59553936	-	LL0000032417	XLOC_001769	low confidence,XP_021326220.1,LOC101882374,uncharacterized LOC101882374	no Blast hit	5	no	discard	identified as duplicate with existing V4.2/RefSeq annotation
chr10	422099	423865	+	LL0000032418	XLOC_001791	low confidence,NP_001025454.1,ldlra,low density lipoprotein receptor a	no Blast hit	1	no	discard	single exon with low confidence or no Blast hit
chr10	436898	438374	+	LL0000032419	XLOC_001793	low confidence,XP_021335606.1,LOC101886098,Fc receptor-like protein 5, transcript variant X5	no Blast hit	1	no	discard	single exon with low confidence or no Blast hit
chr10	456651	457428	+	LL0000032420	XLOC_001795	no Blast hit	no Blast hit	1	no	discard	single exon with low confidence or no Blast hit
chr10	2004118	2004286	+	LL0000032421	XLOC_001813	low confidence,NP_001076344.1,si:dkey-236e20.3,si:dkey-236e20.3	low confidence,XP_016857808.1,FCRL2,Fc receptor-like protein 2 isoform X7	1	no	discard	single exon with low confidence or no Blast hit
chr10	2043577	2047571	+	LL0000032422	XLOC_001814	low confidence,XP_021334698.1,LOC101882148,uncharacterized LOC101882148, transcript variant X5	low confidence,XP_016862321.1,IFT122,intraflagellar transport protein 122 homolog isoform X18	6	no	discard	identified as duplicate with existing V4.2/RefSeq annotation
chr10	2398126	2401479	+	LL0000032423	XLOC_001816	low confidence,NP_001025454.1,ldlra,low density lipoprotein receptor a	no Blast hit	1	no	discard	single exon with low confidence or no Blast hit
chr10	3161733	3165891	+	LL0000032424	XLOC_001835	moderate confidence,NP_001025454.1,ldlra,low density lipoprotein receptor a	no Blast hit	1	no	keep	high/moderate confidence zebrafish BLAST hit
chr10	3512929	3515287	+	LL0000032425	XLOC_001841	low confidence,NP_001336124.1,col18a1a,collagen type XVIII alpha 1 chain a	no Blast hit	1	no	discard	single exon with low confidence or no Blast hit
chr10	3729076	3730146	+	LL0000032426	XLOC_001843	no Blast hit	no Blast hit	1	no	discard	single exon with low confidence or no Blast hit
chr10	4089007	4091356	+	LL0000032427	XLOC_001847	low confidence,NP_001025454.1,ldlra,low density lipoprotein receptor a	no Blast hit	1	no	discard	single exon with low confidence or no Blast hit
chr10	5225327	5226110	+	LL0000032428	XLOC_001864	low confidence,XP_017213985.1,tanc2b,tetratricopeptide repeat, ankyrin repeat and coiled-coil containing 2b	no Blast hit	1	no	discard	single exon with low confidence or no Blast hit
chr10	5602583	5603745	+	LL0000032429	XLOC_001872	low confidence,XP_021335891.1,arhgap27,Rho GTPase activating protein 27, transcript variant X3	no Blast hit	1	no	discard	single exon with low confidence or no Blast hit
chr10	5605300	5606819	+	LL0000032430	XLOC_001873	low confidence,NP_998507.1,ddc,dopa decarboxylase	no Blast hit	1	no	discard	single exon with low confidence or no Blast hit
chr10	5606933	5608631	+	LL0000032431	XLOC_001874	low confidence,NP_001076514.1,sphkap,SPHK1 interactor, AKAP domain containing	no Blast hit	1	no	discard	single exon with low confidence or no Blast hit
chr10	5608874	5609718	+	LL0000032432	XLOC_001875	low confidence,XP_021322010.1,p4ha3,prolyl 4-hydroxylase, alpha polypeptide III, transcript variant X5	no Blast hit	1	no	discard	single exon with low confidence or no Blast hit
chr10	6075355	6075999	+	LL0000032433	XLOC_001882	high confidence,XP_021334914.1,LOC110440061,serine/threonine-protein kinase pim-2-like	low confidence,XP_005265302.1,SNRK,SNF-related serine/threonine-protein kinase isoform X1	3	no	discard	identified as duplicate with existing V4.2/RefSeq annotation
chr10	6691680	6691828	+	LL0000032434	XLOC_001895	low confidence,XP_009306033.1,si:ch73-45o6.2,si:ch73-45o6.2, transcript variant X2	low confidence,XP_011543167.1,ATG2A,autophagy-related protein 2 homolog A isoform X5	1	no	discard	single exon with low confidence or no Blast hit
chr10	10799297	10799961	+	LL0000032435	XLOC_001952	low confidence,XP_001341895.3,abcc1,ATP-binding cassette, sub-family C (CFTR/MRP), member 1	low confidence,XP_016874387.1,DENND5B,DENN domain-containing protein 5B isoform X7	1	no	discard	single exon with low confidence or no Blast hit
chr10	10854936	10856522	+	LL0000032436	XLOC_001954	no Blast hit	low confidence,XP_024302865.1,FGFR1,fibroblast growth factor receptor 1 isoform X11	1	no	discard	single exon with low confidence or no Blast hit
chr10	11126157	11127449	+	LL0000032437	XLOC_001958	no Blast hit	no Blast hit	3	no	discard	identified as duplicate with existing V4.2/RefSeq annotation
chr10	11513686	11517433	+	LL0000032438	XLOC_001964	no Blast hit	no Blast hit	2	no	keep	more than one exon
chr10	11903513	11903798	+	LL0000032439	XLOC_001968	low confidence,XP_005169000.2,si:ch211-150j10.4,si:ch211-150j10.4	low confidence,XP_016856391.1,MTOR,serine/threonine-protein kinase mTOR isoform X5	1	no	discard	single exon with low confidence or no Blast hit
chr10	11904225	11905725	+	LL0000032440	XLOC_001969	low confidence,XP_021322682.1,LOC101882511,uncharacterized LOC101882511	low confidence,NP_115663.2,RTL6,retrotransposon Gag-like protein 6	1	no	discard	single exon with low confidence or no Blast hit
chr10	11906053	11910021	+	LL0000032441	XLOC_001970	low confidence,XP_021331692.1,thy1,Thy-1 cell surface antigen, transcript variant X1	no Blast hit	1	no	discard	single exon with low confidence or no Blast hit
chr10	11911406	11912822	+	LL0000032442	XLOC_001971	no Blast hit	no Blast hit	1	no	discard	single exon with low confidence or no Blast hit
chr10	11957495	11958086	+	LL0000032443	XLOC_001973	no Blast hit	no Blast hit	1	no	discard	single exon with low confidence or no Blast hit
chr10	11966676	11970089	+	LL0000032444	XLOC_001974	high confidence,XP_009289804.2,LOC103908810,uncharacterized LOC103908810	no Blast hit	1	no	keep	high/moderate confidence zebrafish BLAST hit
chr10	11999989	12017056	+	LL0000032445	XLOC_001975	low confidence,XP_021331061.1,LOC110439405,uncharacterized LOC110439405	no Blast hit	4	no	keep	more than one exon
chr10	12145099	12145973	+	LL0000032446	XLOC_001977	low confidence,XP_005159991.1,LOC101886777,predicted GPI-anchored protein 23	no Blast hit	1	no	discard	single exon with low confidence or no Blast hit
chr10	15042803	15044161	+	LL0000032447	XLOC_001992	moderate confidence,NP_001106978.1,il23r,interleukin 23 receptor	no Blast hit	1	no	keep	high/moderate confidence zebrafish BLAST hit
chr10	15746932	15750324	+	LL0000032448	XLOC_002006	exact match,XP_009303475.3,LOC565832,serine/threonine-protein kinase pim-2-like	high confidence,NP_006866.2,PIM2,serine/threonine-protein kinase pim-2	7	no	discard	identified as duplicate with existing V4.2/RefSeq annotation
chr10	15765769	15769362	+	LL0000032449	XLOC_002007	exact match,XP_017213642.2,LOC565709,serine/threonine-protein kinase pim-2-like	high confidence,NP_006866.2,PIM2,serine/threonine-protein kinase pim-2	7	no	discard	identified as duplicate with existing V4.2/RefSeq annotation
chr10	16197669	16198420	+	LL0000032450	XLOC_002018	low confidence,XP_009293431.2,LOC103909419,sialoadhesin-like	no Blast hit	1	no	discard	single exon with low confidence or no Blast hit
chr10	17676752	17678350	+	LL0000032451	XLOC_002038	no Blast hit	no Blast hit	1	no	discard	single exon with low confidence or no Blast hit
chr10	18216522	18218252	+	LL0000032452	XLOC_002047	no Blast hit	no Blast hit	1	no	discard	single exon with low confidence or no Blast hit
chr10	18280550	18282287	+	LL0000032453	XLOC_002049	no Blast hit	no Blast hit	1	no	discard	single exon with low confidence or no Blast hit
chr10	18839980	18840940	+	LL0000032454	XLOC_002052	no Blast hit	no Blast hit	1	no	discard	single exon with low confidence or no Blast hit
chr10	18841790	18844638	+	LL0000032455	XLOC_002053	no Blast hit	no Blast hit	1	no	discard	single exon with low confidence or no Blast hit
chr10	19397414	19399347	+	LL0000032456	XLOC_002060	no Blast hit	no Blast hit	1	no	discard	single exon with low confidence or no Blast hit
chr10	19948229	19949517	+	LL0000032457	XLOC_002068	low confidence,XP_002666176.1,si:ch211-103a14.5,si:ch211-103a14.5	no Blast hit	1	no	discard	single exon with low confidence or no Blast hit
chr10	21532751	21535174	+	LL0000032458	XLOC_002085	no Blast hit	low confidence,NP_612387.1,FDXACB1,ferredoxin-fold anticodon-binding domain-containing protein 1	1	no	discard	single exon with low confidence or no Blast hit
chr10	22140354	22141560	+	LL0000032459	XLOC_002099	low confidence,XP_021322183.1,LOC100004528,spidroin-2-like, transcript variant X1	no Blast hit	1	no	discard	single exon with low confidence or no Blast hit
chr10	23196300	23197120	+	LL0000032460	XLOC_002118	no Blast hit	no Blast hit	1	no	discard	single exon with low confidence or no Blast hit
chr10	23591935	23593417	+	LL0000032461	XLOC_002129	high confidence,XP_021328552.1,LOC101883788,uncharacterized LOC101883788, transcript variant X3	no Blast hit	1	no	keep	high/moderate confidence zebrafish BLAST hit
chr10	25030263	25031339	+	LL0000032462	XLOC_002144	no Blast hit	low confidence,XP_016866147.1,WDR27,WD repeat-containing protein 27 isoform X1	1	no	discard	single exon with low confidence or no Blast hit
chr10	25730831	25732334	+	LL0000032463	XLOC_002152	no Blast hit	low confidence,NP_116318.2,USP45,ubiquitin carboxyl-terminal hydrolase 45 isoform h	1	no	discard	single exon with low confidence or no Blast hit
chr10	26865432	26867544	+	LL0000032464	XLOC_002170	no Blast hit	no Blast hit	1	no	discard	single exon with low confidence or no Blast hit
chr10	28950598	28951986	+	LL0000032465	XLOC_002188	low confidence,NP_001038409.1,jtb,jumping translocation breakpoint	no Blast hit	3	no	keep	more than one exon
chr10	30591327	30593477	+	LL0000032466	XLOC_002204	no Blast hit	no Blast hit	1	no	discard	single exon with low confidence or no Blast hit
chr10	30938626	30940038	+	LL0000032467	XLOC_002207	high confidence,XP_009304992.1,LOC101882900,uncharacterized LOC101882900	no Blast hit	1	no	keep	high/moderate confidence zebrafish BLAST hit
chr10	31735150	31735950	+	LL0000032468	XLOC_002215	no Blast hit	no Blast hit	1	no	discard	single exon with low confidence or no Blast hit
chr10	31864230	31868167	+	LL0000032469	XLOC_002217	no Blast hit	low confidence,XP_006714200.1,F11,coagulation factor XI isoform X2	1	no	discard	single exon with low confidence or no Blast hit
chr10	31926069	31927253	+	LL0000032470	XLOC_002218	low confidence,XP_021322295.1,tax1bp1b,Tax1 (human T-cell leukemia virus type I) binding protein 1b, transcript variant X1	no Blast hit	1	no	discard	single exon with low confidence or no Blast hit
chr10	32152183	32154529	+	LL0000032471	XLOC_002224	no Blast hit	no Blast hit	1	no	discard	single exon with low confidence or no Blast hit
chr10	32154886	32156324	+	LL0000032472	XLOC_002225	low confidence,XP_021336564.1,adgrb3,adhesion G protein-coupled receptor B3, transcript variant X4	low confidence,NP_001695.2,ADGRB3,adhesion G protein-coupled receptor B3	1	no	discard	single exon with low confidence or no Blast hit
chr10	32172199	32173222	+	LL0000032473	XLOC_002226	no Blast hit	low confidence,NP_001137408.1,C15orf61,uncharacterized protein C15orf61 precursor	1	no	discard	single exon with low confidence or no Blast hit
chr10	32893084	32894782	+	LL0000032474	XLOC_002233	exact match,XP_005172774.1,LOC100333185,dnaJ homolog subfamily C member 30	high confidence,NP_115693.2,DNAJC30,dnaJ homolog subfamily C member 30, mitochondrial precursor	1	no	keep	high confidence BLAST hit to human protein
chr10	32894963	32895410	+	LL0000032475	XLOC_002234	no Blast hit	no Blast hit	1	no	discard	single exon with low confidence or no Blast hit
chr10	33355084	33358002	+	LL0000032476	XLOC_002238	low confidence,NP_942572.1,zgc:63569,zgc:63569	low confidence,XP_016878703.1,ABCC6,multidrug resistance-associated protein 6 isoform X4	3	no	keep	more than one exon
chr10	35641596	35643102	+	LL0000032477	XLOC_002271	low confidence,XP_021334750.1,obsl1b,obscurin-like 1b, transcript variant X3	no Blast hit	1	no	discard	single exon with low confidence or no Blast hit
chr10	35647780	35649976	+	LL0000032478	XLOC_002274	low confidence,NP_001070764.1,tmem106c,transmembrane protein 106C	no Blast hit	1	no	discard	single exon with low confidence or no Blast hit
chr10	35762385	35762664	+	LL0000032479	XLOC_002277	low confidence,XP_009298734.1,gramd4a,GRAM domain containing 4a, transcript variant X5	no Blast hit	1	no	discard	single exon with low confidence or no Blast hit
chr10	36131662	36132548	+	LL0000032480	XLOC_002281	low confidence,NP_001018175.1,fbxw2,F-box and WD repeat domain containing 2	no Blast hit	1	no	discard	single exon with low confidence or no Blast hit
chr10	36547508	36548427	+	LL0000032481	XLOC_002305	moderate confidence,XP_021327848.1,LOC100333256,uncharacterized LOC100333256	no Blast hit	1	no	keep	high/moderate confidence zebrafish BLAST hit
chr10	36633991	36635234	+	LL0000032482	XLOC_002306	low confidence,NP_001038409.1,jtb,jumping translocation breakpoint	no Blast hit	1	no	discard	single exon with low confidence or no Blast hit
chr10	37133407	37134930	+	LL0000032483	XLOC_002314	no Blast hit	no Blast hit	1	no	discard	single exon with low confidence or no Blast hit
chr10	41050664	41055887	+	LL0000032484	XLOC_002396	low confidence,XP_021327787.1,LOC103910200,sterile alpha motif domain-containing protein 9-like	no Blast hit	1	no	discard	single exon with low confidence or no Blast hit
chr10	41738916	41740690	+	LL0000032485	XLOC_002402	low confidence,XP_005167608.1,n6amt2,N-6 adenine-specific DNA methyltransferase 2 (putative), transcript variant X1	no Blast hit	1	no	discard	single exon with low confidence or no Blast hit
chr10	41819298	41825491	+	LL0000032486	XLOC_002404	low confidence,NP_001025454.1,ldlra,low density lipoprotein receptor a	no Blast hit	1	no	discard	single exon with low confidence or no Blast hit
chr10	41922471	41923875	+	LL0000032487	XLOC_002406	low confidence,NP_001003597.1,mnd1,meiotic nuclear divisions 1 homolog (S. cerevisiae)	no Blast hit	2	no	keep	more than one exon
chr10	41962113	41965926	+	LL0000032488	XLOC_002408	high confidence,XP_009289536.1,si:ch211-276i12.9,si:ch211-276i12.9	no Blast hit	1	no	keep	high/moderate confidence zebrafish BLAST hit
chr10	42165192	42167307	+	LL0000032489	XLOC_002411	moderate confidence,XP_021330692.1,pfkfb3,6-phosphofructo-2-kinase/fructose-2,6-biphosphatase 3, transcript variant X3	no Blast hit	1	no	keep	high/moderate confidence zebrafish BLAST hit
chr10	42470441	42472116	+	LL0000032490	XLOC_002416	no Blast hit	no Blast hit	1	no	discard	single exon with low confidence or no Blast hit
chr10	42476019	42477226	+	LL0000032491	XLOC_002417	low confidence,XP_005166138.1,gabrb3,gamma-aminobutyric acid (GABA) A receptor, beta 3, transcript variant X3	low confidence,NP_002821.1,PTPN4,tyrosine-protein phosphatase non-receptor type 4	1	no	discard	single exon with low confidence or no Blast hit
chr10	42663816	42664467	+	LL0000032492	XLOC_002420	no Blast hit	no Blast hit	1	no	discard	single exon with low confidence or no Blast hit
chr10	42717963	42721348	+	LL0000032493	XLOC_002422	low confidence,NP_001018332.1,zgc:113057,zgc:113057	no Blast hit	2	no	keep	more than one exon
chr10	43543471	43544236	+	LL0000032494	XLOC_002429	low confidence,NP_001129452.1,zgc:194285,zgc:194285	no Blast hit	1	no	discard	single exon with low confidence or no Blast hit
chr10	43681212	43681347	+	LL0000032495	XLOC_002430	low confidence,XP_009292441.1,p3h4,prolyl 3-hydroxylase family member 4 (non-enzymatic), transcript variant X1	low confidence,XP_016880652.1,FAAP100,Fanconi anemia core complex-associated protein 100 isoform X2	1	no	discard	single exon with low confidence or no Blast hit
chr10	43693746	43696439	+	LL0000032496	XLOC_002431	no Blast hit	no Blast hit	1	no	discard	single exon with low confidence or no Blast hit
chr10	44210857	44238971	+	LL0000032497	XLOC_002436	exact match,XP_021335162.1,LOC100537963,unconventional myosin-XVIIIb-like, transcript variant X2	high confidence,XP_011528768.1,MYO18B,unconventional myosin-XVIIIb isoform X7	16	no	discard	identified as duplicate with existing V4.2/RefSeq annotation
chr10	44946263	44947240	+	LL0000032498	XLOC_002452	moderate confidence,NP_001025454.1,ldlra,low density lipoprotein receptor a	no Blast hit	1	no	keep	high/moderate confidence zebrafish BLAST hit
chr10	1216	2768	-	LL0000032499	XLOC_002464	low confidence,XP_021322046.1,phldb1b,pleckstrin homology-like domain, family B, member 1b, transcript variant X14	no Blast hit	1	no	discard	single exon with low confidence or no Blast hit
chr10	6788	8552	-	LL0000032500	XLOC_002465	no Blast hit	no Blast hit	1	no	discard	single exon with low confidence or no Blast hit
chr10	1183049	1184333	-	LL0000032501	XLOC_002484	no Blast hit	no Blast hit	1	no	discard	single exon with low confidence or no Blast hit
chr10	1414425	1416434	-	LL0000032502	XLOC_002487	low confidence,NP_001106978.1,il23r,interleukin 23 receptor	no Blast hit	1	no	discard	single exon with low confidence or no Blast hit
chr10	1416551	1418669	-	LL0000032503	XLOC_002488	low confidence,XP_009302231.1,LOC560461,IQ motif and SEC7 domain-containing protein 2, transcript variant X5	low confidence,NP_001350624.1,PPT1,palmitoyl-protein thioesterase 1 isoform 3 precursor	1	no	discard	single exon with low confidence or no Blast hit
chr10	1423411	1424552	-	LL0000032504	XLOC_002489	no Blast hit	no Blast hit	1	no	discard	single exon with low confidence or no Blast hit
chr10	1906601	1909162	-	LL0000032505	XLOC_002497	no Blast hit	no Blast hit	2	no	keep	more than one exon
chr10	3183736	3184654	-	LL0000032506	XLOC_002509	no Blast hit	no Blast hit	1	no	discard	single exon with low confidence or no Blast hit
chr10	3708689	3710742	-	LL0000032507	XLOC_002516	no Blast hit	no Blast hit	1	no	discard	single exon with low confidence or no Blast hit
chr10	4607036	4641949	-	LL0000032508	XLOC_002521	low confidence,NP_001002132.1,plppr1,phospholipid phosphatase related 1	low confidence,NP_060223.2,PLPPR1,phospholipid phosphatase-related protein type 1	3	no	keep	more than one exon
chr10	4796645	4797207	-	LL0000032509	XLOC_002522	moderate confidence,NP_001315129.1,si:dkey-77f5.3,si:dkey-77f5.3	low confidence,XP_011528058.1,SPATC1L,speriolin-like protein isoform X2	1	no	keep	high/moderate confidence zebrafish BLAST hit
chr10	4922790	4923849	-	LL0000032510	XLOC_002523	low confidence,NP_001091725.1,zgc:165604,zgc:165604	no Blast hit	1	no	discard	single exon with low confidence or no Blast hit
chr10	4997109	4998224	-	LL0000032511	XLOC_002526	low confidence,XP_017211226.1,LOC108183929,gastrula zinc finger protein XlCGF8.2DB-like	no Blast hit	1	no	discard	single exon with low confidence or no Blast hit
chr10	5662761	5666099	-	LL0000032512	XLOC_002533	low confidence,XP_021333058.1,LOC101883618,uncharacterized protein PF11_0213-like	low confidence,NP_001278340.1,SON,protein SON isoform E	2	no	keep	more than one exon
chr10	6043509	6046207	-	LL0000032513	XLOC_002539	high confidence,XP_021322653.1,LOC110437994,uncharacterized LOC110437994, transcript variant X1	low confidence,XP_011515015.1,GTF2IRD1,general transcription factor II-I repeat domain-containing protein 1 isoform X6	1	no	keep	high/moderate confidence zebrafish BLAST hit
chr10	6410934	6412253	-	LL0000032514	XLOC_002540	moderate confidence,NP_001106978.1,il23r,interleukin 23 receptor	no Blast hit	1	no	keep	high/moderate confidence zebrafish BLAST hit
chr10	6414224	6415349	-	LL0000032515	XLOC_002541	low confidence,NP_001038409.1,jtb,jumping translocation breakpoint	no Blast hit	1	no	discard	single exon with low confidence or no Blast hit
chr10	6736184	6744770	-	LL0000032516	XLOC_002555	high confidence,XP_005172048.2,LOC101882464,uncharacterized LOC101882464	low confidence,NP_033611.1,AGTR1,type-1 angiotensin II receptor isoform 1	5	no	keep	high/moderate confidence zebrafish BLAST hit
chr10	6736816	6737725	-	LL0000032517	XLOC_002556	low confidence,XP_009298332.1,LOC100535105,leucine-rich repeat neuronal protein 3-like, transcript variant X2	no Blast hit	1	no	discard	single exon with low confidence or no Blast hit
chr10	6737726	6739127	-	LL0000032518	XLOC_002557	low confidence,NP_001352480.1,rps6kc1,ribosomal protein S6 kinase polypeptide 1	no Blast hit	2	no	keep	more than one exon
chr10	7558970	7561413	-	LL0000032519	XLOC_002565	low confidence,XP_021324890.1,si:dkey-71d15.2,si:dkey-71d15.2, transcript variant X3	no Blast hit	1	no	discard	single exon with low confidence or no Blast hit
chr10	7561767	7563065	-	LL0000032520	XLOC_002566	low confidence,NP_001025454.1,ldlra,low density lipoprotein receptor a	no Blast hit	1	no	discard	single exon with low confidence or no Blast hit
chr10	7618805	7620076	-	LL0000032521	XLOC_002568	low confidence,XP_021330858.1,znf1085,zinc finger protein 1085	no Blast hit	1	no	discard	single exon with low confidence or no Blast hit
chr10	7805542	7806734	-	LL0000032522	XLOC_002577	low confidence,XP_021330857.1,LOC100332433,gastrula zinc finger protein XlCGF8.2DB-like	no Blast hit	1	no	discard	single exon with low confidence or no Blast hit
chr10	7828239	7828809	-	LL0000032523	XLOC_002579	no Blast hit	low confidence,XP_011520948.1,ZNF75A,zinc finger protein 75A isoform X1	1	no	discard	single exon with low confidence or no Blast hit
chr10	9295284	9297581	-	LL0000032524	XLOC_002610	high confidence,XP_009289536.1,si:ch211-276i12.9,si:ch211-276i12.9	no Blast hit	1	no	keep	high/moderate confidence zebrafish BLAST hit
chr10	9297747	9298662	-	LL0000032525	XLOC_002611	low confidence,XP_005167578.1,ackr3a,atypical chemokine receptor 3a, transcript variant X1	no Blast hit	1	no	discard	single exon with low confidence or no Blast hit
chr10	10300885	10304044	-	LL0000032526	XLOC_002618	high confidence,XP_021333025.1,LOC110439882,uncharacterized LOC110439882	low confidence,XP_011512765.1,ZNF451,E3 SUMO-protein ligase ZNF451 isoform X5	1	no	keep	high/moderate confidence zebrafish BLAST hit
chr10	11133685	11135054	-	LL0000032527	XLOC_002626	low confidence,XP_021329466.1,gb:co360592,expressed sequence CO360592, transcript variant X2	no Blast hit	1	no	discard	single exon with low confidence or no Blast hit
chr10	11982880	11984938	-	LL0000032528	XLOC_002636	moderate confidence,XP_021323637.1,si:dkey-266f7.5,si:dkey-266f7.5, transcript variant X1	no Blast hit	1	no	keep	high/moderate confidence zebrafish BLAST hit
chr10	11985807	11990098	-	LL0000032529	XLOC_002637	high confidence,XP_021331573.1,LOC108184914,uncharacterized LOC108184914	high confidence,NP_001128360.1,RTL1,retrotransposon-like protein 1	1	no	keep	high/moderate confidence zebrafish BLAST hit
chr10	11992362	12008561	-	LL0000032530	XLOC_002638	high confidence,XP_005174467.2,LOC100334495,uncharacterized LOC100334495	no Blast hit	3	no	keep	high/moderate confidence zebrafish BLAST hit
chr10	12186401	12189869	-	LL0000032531	XLOC_002639	high confidence,XP_021327693.1,LOC108190699,transposon Tf2-1 polyprotein, transcript variant X2	high confidence,XP_016864593.1,TMEM161B,transmembrane protein 161B isoform X12	2	no	keep	high/moderate confidence zebrafish BLAST hit
chr10	12226106	12272200	-	LL0000032532	XLOC_002640	low confidence,XP_002665853.1,LOC100330838,uncharacterized LOC100330838	low confidence,NP_001092759.1,SH3RF3,E3 ubiquitin-protein ligase SH3RF3 precursor	3	no	keep	more than one exon
chr10	12344678	12345484	-	LL0000032533	XLOC_002641	low confidence,XP_021324261.1,bub1,BUB1 mitotic checkpoint serine/threonine kinase, transcript variant X2	no Blast hit	1	no	discard	single exon with low confidence or no Blast hit
chr10	12431211	12432991	-	LL0000032534	XLOC_002642	high confidence,XP_021333789.1,LOC110439973,uncharacterized LOC110439973	moderate confidence,XP_016865088.1,GIN1,gypsy retrotransposon integrase-like protein 1 isoform X1	1	no	keep	high/moderate confidence zebrafish BLAST hit
chr10	12992552	12995396	-	LL0000032535	XLOC_002644	high confidence,XP_021331039.1,LOC110439392,uncharacterized LOC110439392	no Blast hit	2	no	keep	high/moderate confidence zebrafish BLAST hit
chr10	14495825	14496434	-	LL0000032536	XLOC_002654	high confidence,XP_009302241.1,si:ch211-196c10.15,si:ch211-196c10.15, transcript variant X2	low confidence,NP_001158307.1,L1TD1,LINE-1 type transposase domain-containing protein 1	1	no	keep	high/moderate confidence zebrafish BLAST hit
chr10	15316103	15316870	-	LL0000032537	XLOC_002665	moderate confidence,NP_001106978.1,il23r,interleukin 23 receptor	low confidence,XP_011541888.1,YTHDC2,3'-5' RNA helicase YTHDC2 isoform X4	1	no	keep	high/moderate confidence zebrafish BLAST hit
chr10	15718013	15719928	-	LL0000032538	XLOC_002670	no Blast hit	no Blast hit	1	no	discard	single exon with low confidence or no Blast hit
chr10	15720088	15723147	-	LL0000032539	XLOC_002671	low confidence,XP_003200160.3,LOC100332535,uncharacterized LOC100332535	no Blast hit	3	no	keep	more than one exon
chr10	17437091	17440294	-	LL0000032540	XLOC_002687	no Blast hit	no Blast hit	1	no	discard	single exon with low confidence or no Blast hit
chr10	17440867	17442380	-	LL0000032541	XLOC_002688	moderate confidence,NP_001025454.1,ldlra,low density lipoprotein receptor a	no Blast hit	1	no	keep	high/moderate confidence zebrafish BLAST hit
chr10	18274825	18281877	-	LL0000032542	XLOC_002699	no Blast hit	no Blast hit	1	no	discard	single exon with low confidence or no Blast hit
chr10	18284068	18285788	-	LL0000032543	XLOC_002700	low confidence,NP_001073641.1,urad,ureidoimidazoline (2-oxo-4-hydroxy-4-carboxy-5-) decarboxylase	no Blast hit	1	no	discard	single exon with low confidence or no Blast hit
chr10	18287053	18289486	-	LL0000032544	XLOC_002701	no Blast hit	low confidence,XP_011526280.1,TMPRSS9,transmembrane protease serine 9 isoform X1	1	no	discard	single exon with low confidence or no Blast hit
chr10	18759891	18760794	-	LL0000032545	XLOC_002703	no Blast hit	no Blast hit	2	no	keep	more than one exon
chr10	19154570	19155280	-	LL0000032546	XLOC_002706	low confidence,XP_009296319.1,si:dkey-217l24.1,si:dkey-217l24.1, transcript variant X2	low confidence,XP_011542285.1,CACNA1F,voltage-dependent L-type calcium channel subunit alpha-1F isoform X2	1	no	discard	single exon with low confidence or no Blast hit
chr10	19708056	19709045	-	LL0000032547	XLOC_002708	no Blast hit	no Blast hit	1	no	discard	single exon with low confidence or no Blast hit
chr10	20021483	20022435	-	LL0000032548	XLOC_002710	no Blast hit	no Blast hit	2	no	keep	more than one exon
chr10	23178150	23198196	-	LL0000032549	XLOC_002763	no Blast hit	no Blast hit	3	no	keep	more than one exon
chr10	23629076	23629901	-	LL0000032550	XLOC_002765	low confidence,NP_956146.1,taf5l,TAF5-like RNA polymerase II, p300/CBP-associated factor (PCAF)-associated factor	no Blast hit	1	no	discard	single exon with low confidence or no Blast hit
chr10	26482911	26483566	-	LL0000032551	XLOC_002800	low confidence,XP_009304989.1,LOC564253,caskin-2, transcript variant X2	no Blast hit	1	no	discard	single exon with low confidence or no Blast hit
chr10	27921117	27922733	-	LL0000032552	XLOC_002816	low confidence,NP_001123546.1,ptar1,protein prenyltransferase alpha subunit repeat containing 1	no Blast hit	4	no	keep	more than one exon
chr10	28381948	28385144	-	LL0000032553	XLOC_002825	high confidence,XP_021335057.1,LOC103911752,uncharacterized LOC103911752, transcript variant X2	low confidence,NP_001185787.1,HLA-DQB2,HLA class II histocompatibility antigen, DQ beta 2 chain isoform 2 precursor	4	no	keep	high/moderate confidence zebrafish BLAST hit
chr10	30608817	30615553	-	LL0000032554	XLOC_002850	low confidence,XP_021324890.1,si:dkey-71d15.2,si:dkey-71d15.2, transcript variant X3	no Blast hit	1	no	discard	single exon with low confidence or no Blast hit
chr10	30988452	30988678	-	LL0000032555	XLOC_002852	low confidence,NP_001002103.1,atg4c,autophagy related 4C, cysteine peptidase	no Blast hit	1	no	discard	single exon with low confidence or no Blast hit
chr10	31795610	31796518	-	LL0000032556	XLOC_002858	no Blast hit	no Blast hit	1	no	discard	single exon with low confidence or no Blast hit
chr10	33158603	33164329	-	LL0000032557	XLOC_002869	moderate confidence,NP_001106978.1,il23r,interleukin 23 receptor	low confidence,XP_011523823.1,TMEM94,transmembrane protein 94 isoform X21	2	no	keep	high/moderate confidence zebrafish BLAST hit
chr10	33540448	33541279	-	LL0000032558	XLOC_002878	low confidence,XP_009305068.1,gucy2g,guanylate cyclase 2g, transcript variant X3	low confidence,NP_001294916.1,ST8SIA5,alpha-2,8-sialyltransferase 8E isoform 3	1	no	discard	single exon with low confidence or no Blast hit
chr10	36433972	36435113	-	LL0000032559	XLOC_002928	low confidence,NP_001106978.1,il23r,interleukin 23 receptor	no Blast hit	1	no	discard	single exon with low confidence or no Blast hit
chr10	37418135	37419745	-	LL0000032560	XLOC_002947	low confidence,XP_021323637.1,si:dkey-266f7.5,si:dkey-266f7.5, transcript variant X1	no Blast hit	1	no	discard	single exon with low confidence or no Blast hit
chr10	38011938	38014184	-	LL0000032561	XLOC_002950	no Blast hit	no Blast hit	1	no	discard	single exon with low confidence or no Blast hit
chr10	38027276	38028813	-	LL0000032562	XLOC_002951	low confidence,XP_021322009.1,p4ha3,prolyl 4-hydroxylase, alpha polypeptide III, transcript variant X2	no Blast hit	1	no	discard	single exon with low confidence or no Blast hit
chr10	38029438	38034847	-	LL0000032563	XLOC_002952	low confidence,XP_021335606.1,LOC101886098,Fc receptor-like protein 5, transcript variant X5	no Blast hit	2	no	keep	more than one exon
chr10	38631245	38634706	-	LL0000032564	XLOC_002961	high confidence,XP_009291920.1,LOC101884166,uncharacterized LOC101884166, transcript variant X2	no Blast hit	2	no	discard	identified as duplicate with existing V4.2/RefSeq annotation
chr10	38636191	38638001	-	LL0000032565	XLOC_002962	high confidence,XP_009291920.1,LOC101884166,uncharacterized LOC101884166, transcript variant X2	no Blast hit	1	no	keep	high/moderate confidence zebrafish BLAST hit
chr10	41355145	41356462	-	LL0000032566	XLOC_003020	no Blast hit	no Blast hit	1	no	discard	single exon with low confidence or no Blast hit
chr10	41357680	41358554	-	LL0000032567	XLOC_003021	no Blast hit	no Blast hit	1	no	discard	single exon with low confidence or no Blast hit
chr10	41612473	41613586	-	LL0000032568	XLOC_003024	no Blast hit	no Blast hit	1	no	discard	single exon with low confidence or no Blast hit
chr10	41742460	41742530	-	LL0000032569	XLOC_003026	low confidence,XP_021334746.1,ttn.1,titin, tandem duplicate 1, transcript variant X1	low confidence,NP_001254479.2,TTN,titin isoform IC	1	no	discard	single exon with low confidence or no Blast hit
chr10	43452195	43453392	-	LL0000032570	XLOC_003051	low confidence,XP_021333783.1,si:ch211-165f21.7,si:ch211-165f21.7	no Blast hit	1	no	discard	single exon with low confidence or no Blast hit
chr10	43488189	43489713	-	LL0000032571	XLOC_003052	moderate confidence,XP_009289536.1,si:ch211-276i12.9,si:ch211-276i12.9	no Blast hit	1	no	keep	high/moderate confidence zebrafish BLAST hit
chr10	43496162	43497593	-	LL0000032572	XLOC_003053	moderate confidence,NP_001106978.1,il23r,interleukin 23 receptor	no Blast hit	1	no	keep	high/moderate confidence zebrafish BLAST hit
chr10	43692318	43693642	-	LL0000032573	XLOC_003057	no Blast hit	no Blast hit	1	no	discard	single exon with low confidence or no Blast hit
chr10	44381002	44399441	-	LL0000032574	XLOC_003071	no Blast hit	no Blast hit	2	no	keep	more than one exon
chr10	44385449	44386695	-	LL0000032575	XLOC_003072	low confidence,NP_001314969.1,enpp7.2,ectonucleotide pyrophosphatase/phosphodiesterase 7, tandem duplicate 2	low confidence,XP_024301996.1,NME5,nucleoside diphosphate kinase homolog 5 isoform X2	1	no	discard	single exon with low confidence or no Blast hit
chr10	44459717	44460975	-	LL0000032576	XLOC_003075	moderate confidence,NP_001002377.1,ccdc62,coiled-coil domain containing 62	no Blast hit	2	no	keep	high/moderate confidence zebrafish BLAST hit
chr10	44543251	44548128	-	LL0000032577	XLOC_003081	no Blast hit	no Blast hit	1	no	discard	single exon with low confidence or no Blast hit
chr10	44549736	44551624	-	LL0000032578	XLOC_003082	moderate confidence,XP_017213655.1,LOC100534832,RING finger protein 122-like	low confidence,XP_016869335.1,RNF122,RING finger protein 122 isoform X1	2	no	keep	high/moderate confidence zebrafish BLAST hit
chr10	44764400	44766219	-	LL0000032579	XLOC_003084	moderate confidence,NP_001025454.1,ldlra,low density lipoprotein receptor a	no Blast hit	1	no	keep	high/moderate confidence zebrafish BLAST hit
chr10	44973146	44976222	-	LL0000032580	XLOC_003087	no Blast hit	no Blast hit	1	no	discard	single exon with low confidence or no Blast hit
chr11	428222	428293	+	LL0000032581	XLOC_003108	low confidence,NP_001299609.1,wdr62,WD repeat domain 62	low confidence,NP_001159405.1,RGS9,regulator of G-protein signaling 9 isoform 3	1	no	discard	single exon with low confidence or no Blast hit
chr11	428476	428547	+	LL0000032582	XLOC_003109	low confidence,NP_001013289.1,zp3a.1,zona pellucida glycoprotein 3a, tandem duplicate 1	low confidence,XP_006712131.1,THADA,thyroid adenoma-associated protein isoform X6	1	no	discard	single exon with low confidence or no Blast hit
chr11	768630	769160	+	LL0000032583	XLOC_003118	low confidence,NP_001032196.1,tamm41,TAM41 mitochondrial translocator assembly and maintenance homolog	low confidence,NP_001308224.1,TAMM41,phosphatidate cytidylyltransferase, mitochondrial isoform d	1	no	discard	single exon with low confidence or no Blast hit
chr11	1415334	1417447	+	LL0000032584	XLOC_003124	no Blast hit	no Blast hit	1	no	discard	single exon with low confidence or no Blast hit
chr11	1984322	1985570	+	LL0000032585	XLOC_003135	no Blast hit	no Blast hit	1	no	discard	single exon with low confidence or no Blast hit
chr11	1992972	2026654	+	LL0000032586	XLOC_003136	low confidence,XP_021336136.1,spag9b,sperm associated antigen 9b	low confidence,XP_024304880.1,RARG,retinoic acid receptor gamma isoform X1	2	no	keep	more than one exon
chr11	2098359	2102634	+	LL0000032587	XLOC_003138	no Blast hit	low confidence,NP_004064.2,PLK3,serine/threonine-protein kinase PLK3	2	no	keep	more than one exon
chr11	2102717	2105766	+	LL0000032588	XLOC_003139	no Blast hit	no Blast hit	1	no	discard	single exon with low confidence or no Blast hit
chr11	2213028	2214055	+	LL0000032589	XLOC_003145	low confidence,XP_021329466.1,gb:co360592,expressed sequence CO360592, transcript variant X2	low confidence,NP_001017534.1,CARD16,caspase recruitment domain-containing protein 16 isoform 1	1	no	discard	single exon with low confidence or no Blast hit
chr11	2318146	2320339	+	LL0000032590	XLOC_003147	moderate confidence,NP_001106978.1,il23r,interleukin 23 receptor	no Blast hit	1	no	keep	high/moderate confidence zebrafish BLAST hit
chr11	2339195	2377714	+	LL0000032591	XLOC_003148	exact match,XP_021335365.1,LOC108191643,LIM domain and actin-binding protein 1-like	high confidence,NP_001107019.1,LIMA1,LIM domain and actin-binding protein 1 isoform 3	12	no	discard	identified as duplicate with existing V4.2/RefSeq annotation
chr11	3201656	3203364	+	LL0000032592	XLOC_003166	low confidence,NP_001139082.1,tmem176,transmembrane protein 176	no Blast hit	1	no	discard	single exon with low confidence or no Blast hit
chr11	3203725	3206686	+	LL0000032593	XLOC_003167	low confidence,XP_021335891.1,arhgap27,Rho GTPase activating protein 27, transcript variant X3	low confidence,NP_932076.1,NME7,nucleoside diphosphate kinase 7 isoform b	1	no	discard	single exon with low confidence or no Blast hit
chr11	6048709	6050724	+	LL0000032594	XLOC_003192	low confidence,XP_021333058.1,LOC101883618,uncharacterized protein PF11_0213-like	low confidence,XP_016860079.1,ANKRD36B,ankyrin repeat domain-containing protein 36B isoform X14	1	no	discard	single exon with low confidence or no Blast hit
chr11	6226662	6229015	+	LL0000032595	XLOC_003199	low confidence,XP_021333058.1,LOC101883618,uncharacterized protein PF11_0213-like	low confidence,NP_001317645.1,ZNF131,zinc finger protein 131 isoform 4	1	no	discard	single exon with low confidence or no Blast hit
chr11	6797796	6800660	+	LL0000032596	XLOC_003213	low confidence,XP_017211226.1,LOC108183929,gastrula zinc finger protein XlCGF8.2DB-like	no Blast hit	1	no	discard	single exon with low confidence or no Blast hit
chr11	6800777	6802170	+	LL0000032597	XLOC_003214	low confidence,NP_001315129.1,si:dkey-77f5.3,si:dkey-77f5.3	no Blast hit	1	no	discard	single exon with low confidence or no Blast hit
chr11	6856167	6856823	+	LL0000032598	XLOC_003217	low confidence,XP_005170350.1,cdkn2aipnl,CDKN2A interacting protein N-terminal like, transcript variant X1	no Blast hit	1	no	discard	single exon with low confidence or no Blast hit
chr11	6898508	6899928	+	LL0000032599	XLOC_003220	low confidence,NP_001025454.1,ldlra,low density lipoprotein receptor a	no Blast hit	1	no	discard	single exon with low confidence or no Blast hit
chr11	6995846	6997812	+	LL0000032600	XLOC_003223	high confidence,XP_021322653.1,LOC110437994,uncharacterized LOC110437994, transcript variant X1	low confidence,NP_001171706.1,SEZ6L,seizure 6-like protein isoform 6 precursor	1	no	keep	high/moderate confidence zebrafish BLAST hit
chr11	6999148	7001166	+	LL0000032601	XLOC_003224	high confidence,XP_021322653.1,LOC110437994,uncharacterized LOC110437994, transcript variant X1	low confidence,XP_011507759.1,CFHR1,complement factor H-related protein 1 isoform X1	1	no	keep	high/moderate confidence zebrafish BLAST hit
chr11	10377959	10380423	+	LL0000032602	XLOC_003247	low confidence,XP_021330274.1,si:ch73-194h10.3,si:ch73-194h10.3	no Blast hit	1	no	discard	single exon with low confidence or no Blast hit
chr11	10380538	10383180	+	LL0000032603	XLOC_003248	low confidence,XP_021330274.1,si:ch73-194h10.3,si:ch73-194h10.3	no Blast hit	1	no	discard	single exon with low confidence or no Blast hit
chr11	10664016	10668631	+	LL0000032604	XLOC_003251	low confidence,XP_009294935.1,lama5,laminin, alpha 5, transcript variant X2	no Blast hit	1	no	discard	single exon with low confidence or no Blast hit
chr11	10801818	10802893	+	LL0000032605	XLOC_003252	no Blast hit	no Blast hit	1	no	discard	single exon with low confidence or no Blast hit
chr11	11823136	11825012	+	LL0000032606	XLOC_003282	no Blast hit	no Blast hit	1	no	discard	single exon with low confidence or no Blast hit
chr11	12808417	12809333	+	LL0000032607	XLOC_003323	low confidence,XP_009300916.1,LOC101882452,uncharacterized LOC101882452, transcript variant X4	no Blast hit	1	no	discard	single exon with low confidence or no Blast hit
chr11	13090842	13092568	+	LL0000032608	XLOC_003330	low confidence,NP_001025454.1,ldlra,low density lipoprotein receptor a	no Blast hit	1	no	discard	single exon with low confidence or no Blast hit
chr11	14755482	14761843	+	LL0000032609	XLOC_003357	high confidence,XP_021324207.1,LOC101887144,uncharacterized LOC101887144	no Blast hit	1	no	keep	high/moderate confidence zebrafish BLAST hit
chr11	14859804	14861327	+	LL0000032610	XLOC_003359	low confidence,XP_021324012.1,LOC103910150,uncharacterized LOC103910150, transcript variant X2	low confidence,NP_149080.2,ZCCHC3,zinc finger CCHC domain-containing protein 3	1	no	discard	single exon with low confidence or no Blast hit
chr11	15152443	15154136	+	LL0000032611	XLOC_003365	low confidence,NP_001076304.1,slc17a8,solute carrier family 17 (vesicular glutamate transporter), member 8	low confidence,XP_011514877.1,PVRIG,transmembrane protein PVRIG isoform X1	1	no	discard	single exon with low confidence or no Blast hit
chr11	15171230	15171929	+	LL0000032612	XLOC_003367	low confidence,XP_005160468.1,znf770,zinc finger protein 770	no Blast hit	1	no	discard	single exon with low confidence or no Blast hit
chr11	15176116	15177610	+	LL0000032613	XLOC_003368	low confidence,XP_021328584.1,si:ch211-149e23.4,si:ch211-149e23.4	no Blast hit	1	no	discard	single exon with low confidence or no Blast hit
chr11	15335741	15336897	+	LL0000032614	XLOC_003371	no Blast hit	no Blast hit	1	no	discard	single exon with low confidence or no Blast hit
chr11	15337229	15341261	+	LL0000032615	XLOC_003372	low confidence,NP_001352226.1,mypn,palladin isoform 1	low confidence,NP_620305.2,SON,protein SON isoform F	1	no	discard	single exon with low confidence or no Blast hit
chr11	15766426	15769099	+	LL0000032616	XLOC_003375	high confidence,XP_021333025.1,LOC110439882,uncharacterized LOC110439882	no Blast hit	1	no	keep	high/moderate confidence zebrafish BLAST hit
chr11	17518942	17520803	+	LL0000032617	XLOC_003392	low confidence,XP_697068.4,gpr158b,G protein-coupled receptor 158b	no Blast hit	1	no	discard	single exon with low confidence or no Blast hit
chr11	17949677	17951156	+	LL0000032618	XLOC_003395	high confidence,XP_021333806.1,lrfn4b,leucine rich repeat and fibronectin type III domain containing 4b, transcript variant X1	low confidence,XP_016865088.1,GIN1,gypsy retrotransposon integrase-like protein 1 isoform X1	1	no	keep	high/moderate confidence zebrafish BLAST hit
chr11	17951278	17953158	+	LL0000032619	XLOC_003396	no Blast hit	no Blast hit	2	no	keep	more than one exon
chr11	18154398	18155175	+	LL0000032620	XLOC_003405	low confidence,NP_001003752.2,babam1,BRISC and BRCA1 A complex member 1	no Blast hit	1	no	discard	single exon with low confidence or no Blast hit
chr11	18168451	18168881	+	LL0000032621	XLOC_003407	no Blast hit	no Blast hit	1	no	discard	single exon with low confidence or no Blast hit
chr11	18169371	18169634	+	LL0000032622	XLOC_003408	low confidence,NP_001002155.1,rpl21,ribosomal protein L21	low confidence,NP_000973.2,RPL21,60S ribosomal protein L21	1	no	discard	single exon with low confidence or no Blast hit
chr11	18332202	18332422	+	LL0000032623	XLOC_003414	low confidence,XP_021333808.1,adam19a,ADAM metallopeptidase domain 19a, transcript variant X2	no Blast hit	2	no	discard	identified as duplicate with existing V4.2/RefSeq annotation
chr11	18334169	18336829	+	LL0000032624	XLOC_003415	no Blast hit	low confidence,XP_005274725.1,IRAK1,interleukin-1 receptor-associated kinase 1 isoform X1	3	no	keep	more than one exon
chr11	18713440	18715185	+	LL0000032625	XLOC_003419	low confidence,XP_021327904.1,arl15b,ADP-ribosylation factor-like 15b, transcript variant X3	no Blast hit	1	no	discard	single exon with low confidence or no Blast hit
chr11	22637112	22638635	+	LL0000032626	XLOC_003448	no Blast hit	no Blast hit	1	no	discard	single exon with low confidence or no Blast hit
chr11	23529320	23536567	+	LL0000032627	XLOC_003453	low confidence,XP_021329186.1,LOC110439107,uncharacterized LOC110439107	no Blast hit	7	no	keep	more than one exon
chr11	27203344	27204026	+	LL0000032628	XLOC_003518	low confidence,NP_001038409.1,jtb,jumping translocation breakpoint	no Blast hit	1	no	discard	single exon with low confidence or no Blast hit
chr11	27204133	27205767	+	LL0000032629	XLOC_003519	no Blast hit	no Blast hit	1	no	discard	single exon with low confidence or no Blast hit
chr11	30234570	30237059	+	LL0000032630	XLOC_003548	moderate confidence,NP_001106978.1,il23r,interleukin 23 receptor	no Blast hit	1	no	keep	high/moderate confidence zebrafish BLAST hit
chr11	30241171	30243731	+	LL0000032631	XLOC_003549	low confidence,XP_021335606.1,LOC101886098,Fc receptor-like protein 5, transcript variant X5	no Blast hit	1	no	discard	single exon with low confidence or no Blast hit
chr11	33844837	33846368	+	LL0000032632	XLOC_003587	low confidence,XP_021335606.1,LOC101886098,Fc receptor-like protein 5, transcript variant X5	no Blast hit	1	no	discard	single exon with low confidence or no Blast hit
chr11	35044740	35046159	+	LL0000032633	XLOC_003594	low confidence,NP_001315129.1,si:dkey-77f5.3,si:dkey-77f5.3	no Blast hit	1	no	discard	single exon with low confidence or no Blast hit
chr11	36980214	36983202	+	LL0000032634	XLOC_003625	low confidence,NP_001038409.1,jtb,jumping translocation breakpoint	no Blast hit	6	no	keep	more than one exon
chr11	37929964	37932881	+	LL0000032635	XLOC_003642	moderate confidence,NP_001106978.1,il23r,interleukin 23 receptor	no Blast hit	1	no	keep	high/moderate confidence zebrafish BLAST hit
chr11	39151256	39152122	+	LL0000032636	XLOC_003651	low confidence,XP_009295904.1,nlrc3,NLR family CARD domain containing 3	no Blast hit	1	no	discard	single exon with low confidence or no Blast hit
chr11	40074634	40077938	+	LL0000032637	XLOC_003657	low confidence,XP_021335606.1,LOC101886098,Fc receptor-like protein 5, transcript variant X5	no Blast hit	1	no	discard	single exon with low confidence or no Blast hit
chr11	40608114	40613321	+	LL0000032638	XLOC_003664	low confidence,XP_021326182.1,ano10b,anoctamin 10b, transcript variant X1	low confidence,XP_011512590.1,ZBED9,SCAN domain-containing protein 3 isoform X2	1	no	discard	single exon with low confidence or no Blast hit
chr11	41050566	41052481	+	LL0000032639	XLOC_003672	low confidence,NP_001038409.1,jtb,jumping translocation breakpoint	low confidence,NP_001155155.1,OTOA,otoancorin isoform 3	1	no	discard	single exon with low confidence or no Blast hit
chr11	41375889	41378020	+	LL0000032640	XLOC_003678	moderate confidence,NP_001025454.1,ldlra,low density lipoprotein receptor a	no Blast hit	1	no	keep	high/moderate confidence zebrafish BLAST hit
chr11	41962277	41964719	+	LL0000032641	XLOC_003685	moderate confidence,NP_001129452.1,zgc:194285,zgc:194285	no Blast hit	1	no	keep	high/moderate confidence zebrafish BLAST hit
chr11	42011066	42011930	+	LL0000032642	XLOC_003687	low confidence,NP_001025454.1,ldlra,low density lipoprotein receptor a	no Blast hit	1	no	discard	single exon with low confidence or no Blast hit
chr11	42024907	42026593	+	LL0000032643	XLOC_003689	no Blast hit	no Blast hit	3	no	keep	more than one exon
chr11	42035683	42036985	+	LL0000032644	XLOC_003690	matches or overlaps with known lincRNA	low confidence,XP_006717192.1,PAPPA,pappalysin-1 isoform X2	1	yes	keep	maps to previously identified lincRNA
chr11	42057857	42059175	+	LL0000032645	XLOC_003692	matches or overlaps with known lincRNA	no Blast hit	1	yes	keep	maps to previously identified lincRNA
chr11	42463219	42464944	+	LL0000032646	XLOC_003698	no Blast hit	no Blast hit	1	no	discard	single exon with low confidence or no Blast hit
chr11	42563760	42564818	+	LL0000032647	XLOC_003705	low confidence,NP_001025454.1,ldlra,low density lipoprotein receptor a	no Blast hit	1	no	discard	single exon with low confidence or no Blast hit
chr11	42565405	42567227	+	LL0000032648	XLOC_003706	low confidence,XP_021322467.1,adamtsl4,ADAMTS-like 4, transcript variant X1	no Blast hit	1	no	discard	single exon with low confidence or no Blast hit
chr11	42825280	42826507	+	LL0000032649	XLOC_003713	low confidence,NP_001005589.1,rps4x,ribosomal protein S4, X-linked	no Blast hit	1	no	discard	single exon with low confidence or no Blast hit
chr11	43018132	43020279	+	LL0000032650	XLOC_003715	low confidence,XP_021335606.1,LOC101886098,Fc receptor-like protein 5, transcript variant X5	no Blast hit	1	no	discard	single exon with low confidence or no Blast hit
chr11	43054673	43063253	+	LL0000032651	XLOC_003718	low confidence,NP_001116321.1,acyp1,acylphosphatase 1, erythrocyte (common) type	low confidence,NP_001307517.1,ACYP2,acylphosphatase-2 isoform 4	2	no	keep	more than one exon
chr11	43064364	43065259	+	LL0000032652	XLOC_003719	low confidence,XP_003199078.1,rbpms,RNA binding protein with multiple splicing, transcript variant X3	low confidence,XP_016884983.1,SHROOM2,protein Shroom2 isoform X3	1	no	discard	single exon with low confidence or no Blast hit
chr11	43085985	43087128	+	LL0000032653	XLOC_003721	low confidence,NP_001082865.2,si:dkeyp-53d3.3,si:dkeyp-53d3.3	low confidence,NP_001230056.1,PACS2,phosphofurin acidic cluster sorting protein 2 isoform 3	1	no	discard	single exon with low confidence or no Blast hit
chr11	43809236	43809943	+	LL0000032654	XLOC_003732	low confidence,XP_009298008.1,elavl3,ELAV like neuron-specific RNA binding protein 3, transcript variant X1	low confidence,NP_001159607.1,RBM28,RNA-binding protein 28 isoform 2	1	no	discard	single exon with low confidence or no Blast hit
chr11	44451204	44451660	+	LL0000032655	XLOC_003742	no Blast hit	no Blast hit	1	no	discard	single exon with low confidence or no Blast hit
chr11	245135	245885	-	LL0000032656	XLOC_003778	low confidence,XP_005174618.4,LOC101882453,LIM and calponin homology domains-containing protein 1-like	no Blast hit	1	no	discard	single exon with low confidence or no Blast hit
chr11	893277	896071	-	LL0000032657	XLOC_003798	low confidence,NP_001003597.1,mnd1,meiotic nuclear divisions 1 homolog (S. cerevisiae)	no Blast hit	1	no	discard	single exon with low confidence or no Blast hit
chr11	1419405	1419451	-	LL0000032658	XLOC_003807	low confidence,XP_009300834.1,LOC100330694,uncharacterized LOC100330694, transcript variant X1	no Blast hit	1	no	discard	single exon with low confidence or no Blast hit
chr11	2233213	2235159	-	LL0000032659	XLOC_003816	low confidence,XP_021335606.1,LOC101886098,Fc receptor-like protein 5, transcript variant X5	no Blast hit	1	no	discard	single exon with low confidence or no Blast hit
chr11	2362287	2362602	-	LL0000032660	XLOC_003819	low confidence,NP_001315129.1,si:dkey-77f5.3,si:dkey-77f5.3	no Blast hit	1	no	discard	single exon with low confidence or no Blast hit
chr11	2517171	2539415	-	LL0000032661	XLOC_003823	high confidence,XP_693039.6,ankrd52b,ankyrin repeat domain 52b	high confidence,XP_011536499.1,ANKRD52,serine/threonine-protein phosphatase 6 regulatory ankyrin repeat subunit C isoform X3	7	no	keep	high/moderate confidence zebrafish BLAST hit
chr11	2993713	2994936	-	LL0000032662	XLOC_003829	no Blast hit	no Blast hit	1	no	discard	single exon with low confidence or no Blast hit
chr11	4200354	4200748	-	LL0000032663	XLOC_003850	low confidence,XP_009299693.1,cfap73,cilia and flagella associated protein 73	low confidence,NP_852480.1,EXOSC8,exosome complex component RRP43	1	no	discard	single exon with low confidence or no Blast hit
chr11	4200911	4201522	-	LL0000032664	XLOC_003851	no Blast hit	no Blast hit	1	no	discard	single exon with low confidence or no Blast hit
chr11	6344399	6346816	-	LL0000032665	XLOC_003867	low confidence,XP_021325561.1,tead3a,TEA domain family member 3 a, transcript variant X4	no Blast hit	1	no	discard	single exon with low confidence or no Blast hit
chr11	6989952	6993926	-	LL0000032666	XLOC_003878	low confidence,XP_021326182.1,ano10b,anoctamin 10b, transcript variant X1	low confidence,XP_006710932.1,TIE1,tyrosine-protein kinase receptor Tie-1 isoform X3	1	no	discard	single exon with low confidence or no Blast hit
chr11	9557913	9560788	-	LL0000032667	XLOC_003901	no Blast hit	no Blast hit	1	no	discard	single exon with low confidence or no Blast hit
chr11	10184414	10328535	-	LL0000032668	XLOC_003903	low confidence,XP_021336603.1,dst,dystonin	no Blast hit	4	no	keep	more than one exon
chr11	10360898	10362589	-	LL0000032669	XLOC_003904	low confidence,XP_021330274.1,si:ch73-194h10.3,si:ch73-194h10.3	no Blast hit	1	no	discard	single exon with low confidence or no Blast hit
chr11	12463704	12465595	-	LL0000032670	XLOC_003968	low confidence,NP_001307081.1,LOC107197950,uncharacterized LOC107197950	low confidence,NP_079091.3,NUDT18,8-oxo-dGDP phosphatase NUDT18	6	no	discard	identified as duplicate with existing V4.2/RefSeq annotation
chr11	12770860	12776724	-	LL0000032671	XLOC_003984	high confidence,XP_001335379.1,si:dkey-210i3.1,si:dkey-210i3.1	low confidence,NP_002887.2,RBM4,RNA-binding protein 4 isoform 1	1	no	keep	high/moderate confidence zebrafish BLAST hit
chr11	13274873	13276504	-	LL0000032672	XLOC_003988	low confidence,XP_021323936.1,si:dkey-89b17.4,si:dkey-89b17.4, transcript variant X5	no Blast hit	1	no	discard	single exon with low confidence or no Blast hit
chr11	14647960	14654733	-	LL0000032673	XLOC_003997	low confidence,NP_001229967.1,creb3l1,cAMP responsive element binding protein 3-like 1	low confidence,XP_024306912.1,TUBB8P12,tubulin beta 8 pseudogene 12 isoform X1	2	no	discard	identified as duplicate with existing V4.2/RefSeq annotation
chr11	14761311	14762680	-	LL0000032674	XLOC_004000	no Blast hit	no Blast hit	1	no	discard	single exon with low confidence or no Blast hit
chr11	14764408	14766063	-	LL0000032675	XLOC_004001	no Blast hit	no Blast hit	1	no	discard	single exon with low confidence or no Blast hit
chr11	14766818	14768047	-	LL0000032676	XLOC_004002	no Blast hit	low confidence,NP_659483.2,CALR3,calreticulin-3 precursor	1	no	discard	single exon with low confidence or no Blast hit
chr11	14880305	14880988	-	LL0000032677	XLOC_004006	moderate confidence,XP_021335606.1,LOC101886098,Fc receptor-like protein 5, transcript variant X5	low confidence,NP_066939.1,ADCY1,adenylate cyclase type 1 isoform 1	1	no	keep	high/moderate confidence zebrafish BLAST hit
chr11	15204906	15208033	-	LL0000032678	XLOC_004014	low confidence,XP_009304992.1,LOC101882900,uncharacterized LOC101882900	no Blast hit	3	no	keep	more than one exon
chr11	15211206	15211720	-	LL0000032679	XLOC_004015	low confidence,NP_001121732.1,cdk14,cyclin-dependent kinase 14	no Blast hit	1	no	discard	single exon with low confidence or no Blast hit
chr11	15211857	15220463	-	LL0000032680	XLOC_004016	high confidence,XP_021326758.1,LOC110438542,uncharacterized LOC110438542	no Blast hit	1	no	keep	high/moderate confidence zebrafish BLAST hit
chr11	15324493	15328464	-	LL0000032681	XLOC_004018	high confidence,XP_003199161.1,LOC100535543,uncharacterized protein K02A2.6-like	moderate confidence,XP_016878275.1,LOC107984745,uncharacterized protein LOC107984745	1	no	keep	high/moderate confidence zebrafish BLAST hit
chr11	16412910	16414347	-	LL0000032682	XLOC_004036	low confidence,NP_001038409.1,jtb,jumping translocation breakpoint	no Blast hit	4	no	keep	more than one exon
chr11	16414474	16415795	-	LL0000032683	XLOC_004037	low confidence,NP_956073.2,pdia4,protein disulfide isomerase family A, member 4	no Blast hit	2	no	keep	more than one exon
chr11	17535867	17536529	-	LL0000032684	XLOC_004043	low confidence,XP_021329064.1,LOC562049,formin-binding protein 1-like, transcript variant X23	no Blast hit	1	no	discard	single exon with low confidence or no Blast hit
chr11	19242720	19242792	-	LL0000032685	XLOC_004066	low confidence,NP_001038409.1,jtb,jumping translocation breakpoint	low confidence,NP_110438.1,MRPS26,28S ribosomal protein S26, mitochondrial	1	no	discard	single exon with low confidence or no Blast hit
chr11	20115138	20124060	-	LL0000032686	XLOC_004075	high confidence,XP_021330197.1,LOC110438318,uncharacterized LOC110438318	low confidence,NP_055405.3,ERVW-1,syncytin-1 precursor	4	no	keep	high/moderate confidence zebrafish BLAST hit
chr11	20135012	20142357	-	LL0000032687	XLOC_004076	exact match,XP_021330334.1,LOC108191636,uncharacterized LOC108191636, transcript variant X1	low confidence,XP_011515460.1,GSDMC,gasdermin-C isoform X1	3	no	discard	identified as duplicate with existing V4.2/RefSeq annotation
chr11	21117798	21119718	-	LL0000032688	XLOC_004081	no Blast hit	low confidence,XP_024307519.1,URI1,unconventional prefoldin RPB5 interactor 1 isoform X4	2	no	keep	more than one exon
chr11	21148392	21149568	-	LL0000032689	XLOC_004082	low confidence,NP_001032662.1,actn2b,actinin, alpha 2b	low confidence,XP_016857826.1,NOL9,polynucleotide 5'-hydroxyl-kinase NOL9 isoform X1	1	no	discard	single exon with low confidence or no Blast hit
chr11	23083509	23084504	-	LL0000032690	XLOC_004096	no Blast hit	no Blast hit	1	no	discard	single exon with low confidence or no Blast hit
chr11	23532455	23533961	-	LL0000032691	XLOC_004104	low confidence,XP_021335702.1,pagr1,PAXIP1 associated glutamate-rich protein 1, transcript variant X1	no Blast hit	1	no	discard	single exon with low confidence or no Blast hit
chr11	24711118	24714296	-	LL0000032692	XLOC_004117	high confidence,XP_021331126.1,LOC110439429,uncharacterized LOC110439429, transcript variant X4	no Blast hit	9	no	discard	identified as duplicate with existing V4.2/RefSeq annotation
chr11	25855060	25855736	-	LL0000032693	XLOC_004135	low confidence,NP_001017730.1,b4galt1,UDP-Gal:betaGlcNAc beta 1,4- galactosyltransferase, polypeptide 1	low confidence,NP_001277134.1,DCP1A,mRNA-decapping enzyme 1A isoform c	1	no	discard	single exon with low confidence or no Blast hit
chr11	26563778	26565972	-	LL0000032694	XLOC_004141	low confidence,XP_009289536.1,si:ch211-276i12.9,si:ch211-276i12.9	no Blast hit	1	no	discard	single exon with low confidence or no Blast hit
chr11	31546625	31548549	-	LL0000032695	XLOC_004189	low confidence,XP_009299513.1,ksr2,kinase suppressor of ras 2, transcript variant X1	no Blast hit	4	no	keep	more than one exon
chr11	32334177	32334241	-	LL0000032696	XLOC_004191	low confidence,XP_688859.4,lrp10,low density lipoprotein receptor-related protein 10	low confidence,NP_758955.2,TUSC5,trafficking regulator of GLUT4 1	1	no	discard	single exon with low confidence or no Blast hit
chr11	32762469	32765315	-	LL0000032697	XLOC_004195	low confidence,XP_009300916.1,LOC101882452,uncharacterized LOC101882452, transcript variant X4	no Blast hit	6	no	keep	more than one exon
chr11	32772550	32775010	-	LL0000032698	XLOC_004196	low confidence,XP_021335605.1,LOC101886098,Fc receptor-like protein 5, transcript variant X2	low confidence,XP_011521014.1,HAGHL,hydroxyacylglutathione hydrolase-like protein isoform X2	1	no	discard	single exon with low confidence or no Blast hit
chr11	32775255	32778099	-	LL0000032699	XLOC_004197	low confidence,NP_001139082.1,tmem176,transmembrane protein 176	low confidence,XP_016856424.1,SYT14,synaptotagmin-14 isoform X4	1	no	discard	single exon with low confidence or no Blast hit
chr11	32778293	32779121	-	LL0000032700	XLOC_004198	low confidence,NP_001153300.1,slc4a11,solute carrier family 4, sodium borate transporter, member 11	no Blast hit	1	no	discard	single exon with low confidence or no Blast hit
chr11	32779203	32781386	-	LL0000032701	XLOC_004199	low confidence,XP_003199871.2,LOC100536761,protocadherin beta-15-like	low confidence,XP_016859086.1,MAPRE3,microtubule-associated protein RP/EB family member 3 isoform X1	1	no	discard	single exon with low confidence or no Blast hit
chr11	33806459	33806949	-	LL0000032702	XLOC_004204	low confidence,XP_005170859.1,LOC101885117,uncharacterized LOC101885117	no Blast hit	1	no	discard	single exon with low confidence or no Blast hit
chr11	35071874	35074233	-	LL0000032703	XLOC_004224	low confidence,NP_001025364.1,zgc:114081,zgc:114081	low confidence,NP_113674.1,ZNF484,zinc finger protein 484 isoform a	1	no	discard	single exon with low confidence or no Blast hit
chr11	35074373	35075350	-	LL0000032704	XLOC_004225	low confidence,NP_001315129.1,si:dkey-77f5.3,si:dkey-77f5.3	no Blast hit	1	no	discard	single exon with low confidence or no Blast hit
chr11	37679021	37679671	-	LL0000032705	XLOC_004253	no Blast hit	low confidence,XP_016868070.1,ZAN,zonadhesin isoform X1	1	no	discard	single exon with low confidence or no Blast hit
chr11	38025752	38026310	-	LL0000032706	XLOC_004259	no Blast hit	low confidence,NP_001307551.1,BOLA2-SMG1P6,BOLA2-SMG1P6 protein isoform a	1	no	discard	single exon with low confidence or no Blast hit
chr11	38027404	38029370	-	LL0000032707	XLOC_004260	low confidence,NP_001106978.1,il23r,interleukin 23 receptor	no Blast hit	1	no	discard	single exon with low confidence or no Blast hit
chr11	38150107	38159672	-	LL0000032708	XLOC_004263	low confidence,NP_001038409.1,jtb,jumping translocation breakpoint	no Blast hit	1	no	discard	single exon with low confidence or no Blast hit
chr11	39010102	39010738	-	LL0000032709	XLOC_004275	low confidence,XP_021326182.1,ano10b,anoctamin 10b, transcript variant X1	low confidence,NP_001005182.1,OR6C1,olfactory receptor 6C1	1	no	discard	single exon with low confidence or no Blast hit
chr11	39208191	39214388	-	LL0000032710	XLOC_004280	high confidence,NP_001107105.1,si:dkey-103d23.5,si:dkey-103d23.5	low confidence,XP_016877935.1,ISLR2,immunoglobulin superfamily containing leucine-rich repeat protein 2 isoform X2	3	no	keep	high/moderate confidence zebrafish BLAST hit
chr11	40131370	40132320	-	LL0000032711	XLOC_004285	no Blast hit	no Blast hit	1	no	discard	single exon with low confidence or no Blast hit
chr11	40223268	40223917	-	LL0000032712	XLOC_004289	low confidence,NP_956038.1,ss18,synovial sarcoma translocation, chromosome 18 (H. sapiens), transcript variant 1	low confidence,XP_016883273.1,SS18L1,calcium-responsive transactivator isoform X3	1	no	discard	single exon with low confidence or no Blast hit
chr11	40224031	40225653	-	LL0000032713	XLOC_004290	no Blast hit	no Blast hit	1	no	discard	single exon with low confidence or no Blast hit
chr11	42419082	42419164	-	LL0000032714	XLOC_004317	low confidence,NP_001038462.2,slco1c1,solute carrier organic anion transporter family, member 1C1	no Blast hit	1	no	discard	single exon with low confidence or no Blast hit
chr11	43820365	43822387	-	LL0000032715	XLOC_004332	low confidence,XP_021326182.1,ano10b,anoctamin 10b, transcript variant X1	low confidence,NP_001072983.1,TBCE,tubulin-specific chaperone E isoform a	1	no	discard	single exon with low confidence or no Blast hit
chr11	43859885	43859926	-	LL0000032716	XLOC_004333	low confidence,XP_021335702.1,pagr1,PAXIP1 associated glutamate-rich protein 1, transcript variant X1	no Blast hit	1	no	discard	single exon with low confidence or no Blast hit
chr11	43937910	43939724	-	LL0000032717	XLOC_004334	low confidence,XP_005155548.1,hmgcs1,3-hydroxy-3-methylglutaryl-CoA synthase 1 (soluble), transcript variant X1	low confidence,NP_001116295.1,GTF3C5,general transcription factor 3C polypeptide 5 isoform 1	1	no	discard	single exon with low confidence or no Blast hit
chr11	43939846	43943763	-	LL0000032718	XLOC_004335	moderate confidence,NP_001106978.1,il23r,interleukin 23 receptor	no Blast hit	1	no	keep	high/moderate confidence zebrafish BLAST hit
chr11	43943891	43944672	-	LL0000032719	XLOC_004336	no Blast hit	no Blast hit	1	no	discard	single exon with low confidence or no Blast hit
chr11	43953409	43954867	-	LL0000032720	XLOC_004338	low confidence,XP_021326182.1,ano10b,anoctamin 10b, transcript variant X1	no Blast hit	1	no	discard	single exon with low confidence or no Blast hit
chr11	43955345	43956305	-	LL0000032721	XLOC_004339	no Blast hit	no Blast hit	1	no	discard	single exon with low confidence or no Blast hit
chr11	44908003	44910289	-	LL0000032722	XLOC_004357	no Blast hit	no Blast hit	5	no	keep	more than one exon
chr12	795816	798249	+	LL0000032723	XLOC_004390	no Blast hit	no Blast hit	2	no	keep	more than one exon
chr12	798412	800644	+	LL0000032724	XLOC_004391	low confidence,NP_001106977.1,il12rb2,interleukin 12 receptor, beta 2a	low confidence,NP_085050.2,THAP7,THAP domain-containing protein 7	1	no	discard	single exon with low confidence or no Blast hit
chr12	800948	802346	+	LL0000032725	XLOC_004392	low confidence,XP_021334717.1,galnt3,UDP-N-acetyl-alpha-D-galactosamine:polypeptide N-acetylgalactosaminyltransferase 3 (GalNAc-T3)	no Blast hit	1	no	discard	single exon with low confidence or no Blast hit
chr12	802529	803668	+	LL0000032726	XLOC_004393	no Blast hit	no Blast hit	1	no	discard	single exon with low confidence or no Blast hit
chr12	1067283	1070757	+	LL0000032727	XLOC_004397	low confidence,XP_021324890.1,si:dkey-71d15.2,si:dkey-71d15.2, transcript variant X3	no Blast hit	1	no	discard	single exon with low confidence or no Blast hit
chr12	1246821	1247434	+	LL0000032728	XLOC_004400	low confidence,XP_009293267.2,cfap61,cilia and flagella associated protein 61, transcript variant X4	low confidence,NP_001166175.1,GGA3,ADP-ribosylation factor-binding protein GGA3 isoform 2	1	no	discard	single exon with low confidence or no Blast hit
chr12	1838154	1937795	+	LL0000032729	XLOC_004407	matches or overlaps with known lincRNA	low confidence,NP_001005473.1,PLCXD3,PI-PLC X domain-containing protein 3	5	yes	keep	maps to previously identified lincRNA
chr12	2000030	2003792	+	LL0000032730	XLOC_004408	matches or overlaps with known lincRNA	no Blast hit	3	yes	keep	maps to previously identified lincRNA
chr12	4048634	4050005	+	LL0000032731	XLOC_004431	low confidence,NP_001122154.1,klhl40a,kelch-like family member 40a	no Blast hit	1	no	discard	single exon with low confidence or no Blast hit
chr12	4281404	4282730	+	LL0000032732	XLOC_004437	moderate confidence,NP_001106978.1,il23r,interleukin 23 receptor	no Blast hit	1	no	keep	high/moderate confidence zebrafish BLAST hit
chr12	8453688	8454344	+	LL0000032733	XLOC_004480	low confidence,XP_009305873.1,apbb2b,amyloid beta (A4) precursor protein-binding, family B, member 2b, transcript variant X6	no Blast hit	1	no	discard	single exon with low confidence or no Blast hit
chr12	8517831	8539066	+	LL0000032734	XLOC_004482	high confidence,XP_021323971.1,LOC103909212,zinc finger CCHC domain-containing protein 12-like	moderate confidence,NP_071434.2,MOAP1,modulator of apoptosis 1	3	no	keep	high/moderate confidence zebrafish BLAST hit
chr12	8522808	8525533	+	LL0000032735	XLOC_004483	high confidence,XP_021323131.1,LOC110438047,uncharacterized LOC110438047	high confidence,XP_016865088.1,GIN1,gypsy retrotransposon integrase-like protein 1 isoform X1	1	no	keep	high/moderate confidence zebrafish BLAST hit
chr12	8821015	8821181	+	LL0000032736	XLOC_004485	low confidence,XP_021333659.1,LOC110439948,uncharacterized LOC110439948	low confidence,NP_001138609.1,CPT1B,carnitine O-palmitoyltransferase 1, muscle isoform isoform a	1	no	discard	single exon with low confidence or no Blast hit
chr12	10410902	10410983	+	LL0000032737	XLOC_004504	low confidence,XP_009295669.1,arfgef1,ADP-ribosylation factor guanine nucleotide-exchange factor 1 (brefeldin A-inhibited), transcript variant X1	low confidence,XP_005251191.1,ARFGEF1,brefeldin A-inhibited guanine nucleotide-exchange protein 1 isoform X1	1	no	discard	single exon with low confidence or no Blast hit
chr12	11811321	11811361	+	LL0000032738	XLOC_004515	no Blast hit	no Blast hit	1	no	discard	single exon with low confidence or no Blast hit
chr12	13088886	13089843	+	LL0000032739	XLOC_004519	moderate confidence,XP_021325913.1,LOC110438340,uncharacterized LOC110438340	no Blast hit	1	no	keep	high/moderate confidence zebrafish BLAST hit
chr12	13268486	13269569	+	LL0000032740	XLOC_004525	no Blast hit	no Blast hit	1	no	discard	single exon with low confidence or no Blast hit
chr12	15112116	15115188	+	LL0000032741	XLOC_004543	low confidence,XP_021332294.1,LOC110439826,uncharacterized LOC110439826	low confidence,NP_078816.2,MRPL24,39S ribosomal protein L24, mitochondrial	10	no	discard	identified as duplicate with existing V4.2/RefSeq annotation
chr12	15127622	15128053	+	LL0000032742	XLOC_004544	no Blast hit	no Blast hit	1	no	discard	single exon with low confidence or no Blast hit
chr12	15265164	15268501	+	LL0000032743	XLOC_004546	low confidence,NP_001076334.1,si:ch211-262h13.3,si:ch211-262h13.3	no Blast hit	5	no	keep	more than one exon
chr12	15269323	15270021	+	LL0000032744	XLOC_004547	low confidence,NP_001076334.1,si:ch211-262h13.3,si:ch211-262h13.3	low confidence,XP_016867853.1,RNF216,E3 ubiquitin-protein ligase RNF216 isoform X3	2	no	keep	more than one exon
chr12	16007818	16018389	+	LL0000032745	XLOC_004556	high confidence,XP_021324313.1,ftr06,finTRIM family, member 6, transcript variant X1	high confidence,NP_001128360.1,RTL1,retrotransposon-like protein 1	3	no	keep	high/moderate confidence zebrafish BLAST hit
chr12	16104771	16105899	+	LL0000032746	XLOC_004558	no Blast hit	no Blast hit	1	no	discard	single exon with low confidence or no Blast hit
chr12	16773072	16778644	+	LL0000032747	XLOC_004567	high confidence,NP_571273.2,ctslb,cathepsin Lb precursor	low confidence,NP_001186668.1,CTSS,cathepsin S isoform 2 preproprotein	5	no	keep	high/moderate confidence zebrafish BLAST hit
chr12	16781908	16782727	+	LL0000032748	XLOC_004568	no Blast hit	low confidence,NP_060897.3,RRN3,RNA polymerase I-specific transcription initiation factor RRN3 isoform 1	2	no	keep	more than one exon
chr12	16794452	16795435	+	LL0000032749	XLOC_004569	low confidence,XP_698501.6,dip2cb,disco-interacting protein 2 homolog Cb, transcript variant X2	no Blast hit	1	no	discard	single exon with low confidence or no Blast hit
chr12	17902685	17911436	+	LL0000032750	XLOC_004589	high confidence,XP_017206660.2,LOC567650,protein FAM13A-like	low confidence,NP_055698.2,FAM13A,protein FAM13A isoform a	2	no	keep	high/moderate confidence zebrafish BLAST hit
chr12	20051685	20056714	+	LL0000032751	XLOC_004627	low confidence,XP_021326442.1,LOC101887189,uncharacterized LOC101887189	no Blast hit	1	no	discard	single exon with low confidence or no Blast hit
chr12	20546798	20547763	+	LL0000032752	XLOC_004634	low confidence,XP_021328378.1,LOC110438973,uncharacterized LOC110438973	low confidence,NP_001273766.1,RNASEH1,ribonuclease H1 isoform 3	1	no	discard	single exon with low confidence or no Blast hit
chr12	21077069	21098392	+	LL0000032753	XLOC_004644	no Blast hit	low confidence,XP_011509221.1,CFAP65,cilia- and flagella-associated protein 65 isoform X7	6	no	keep	more than one exon
chr12	21131834	21132449	+	LL0000032754	XLOC_004645	no Blast hit	no Blast hit	1	no	discard	single exon with low confidence or no Blast hit
chr12	22094430	22094780	+	LL0000032755	XLOC_004651	low confidence,NP_001002228.1,rhbdf1a,rhomboid 5 homolog 1a (Drosophila)	no Blast hit	1	no	discard	single exon with low confidence or no Blast hit
chr12	22094851	22099278	+	LL0000032756	XLOC_004652	no Blast hit	no Blast hit	4	no	keep	more than one exon
chr12	23434423	23435750	+	LL0000032757	XLOC_004666	no Blast hit	low confidence,NP_776255.2,VN1R2,vomeronasal type-1 receptor 2	1	no	discard	single exon with low confidence or no Blast hit
chr12	23439843	23441840	+	LL0000032758	XLOC_004667	low confidence,NP_001025454.1,ldlra,low density lipoprotein receptor a	no Blast hit	1	no	discard	single exon with low confidence or no Blast hit
chr12	23445996	23447960	+	LL0000032759	XLOC_004668	moderate confidence,NP_001025454.1,ldlra,low density lipoprotein receptor a	no Blast hit	1	no	keep	high/moderate confidence zebrafish BLAST hit
chr12	24657184	24664165	+	LL0000032760	XLOC_004681	high confidence,NP_001106978.1,il23r,interleukin 23 receptor	no Blast hit	2	no	keep	high/moderate confidence zebrafish BLAST hit
chr12	24658074	24661500	+	LL0000032761	XLOC_004682	low confidence,NP_001076334.1,si:ch211-262h13.3,si:ch211-262h13.3	low confidence,XP_016867853.1,RNF216,E3 ubiquitin-protein ligase RNF216 isoform X3	6	no	keep	more than one exon
chr12	24661888	24662271	+	LL0000032762	XLOC_004683	low confidence,XP_021325961.1,si:dkey-96n2.3,si:dkey-96n2.3	no Blast hit	1	no	discard	single exon with low confidence or no Blast hit
chr12	26969674	26971799	+	LL0000032763	XLOC_004709	low confidence,XP_017214445.2,LOC101885244,uncharacterized LOC101885244, transcript variant X1	no Blast hit	1	no	discard	single exon with low confidence or no Blast hit
chr12	28242054	28243560	+	LL0000032764	XLOC_004729	low confidence,NP_001123546.1,ptar1,protein prenyltransferase alpha subunit repeat containing 1	low confidence,NP_443132.3,CSMD3,CUB and sushi domain-containing protein 3 isoform 3	4	no	keep	more than one exon
chr12	29823404	29826215	+	LL0000032765	XLOC_004751	no Blast hit	no Blast hit	1	no	discard	single exon with low confidence or no Blast hit
chr12	30620851	30622085	+	LL0000032766	XLOC_004764	no Blast hit	no Blast hit	1	no	discard	single exon with low confidence or no Blast hit
chr12	32378554	32380542	+	LL0000032767	XLOC_004790	low confidence,XP_021329466.1,gb:co360592,expressed sequence CO360592, transcript variant X2	no Blast hit	1	no	discard	single exon with low confidence or no Blast hit
chr12	33338082	33339034	+	LL0000032768	XLOC_004796	no Blast hit	no Blast hit	2	no	keep	more than one exon
chr12	35025484	35027870	+	LL0000032769	XLOC_004817	no Blast hit	no Blast hit	1	no	discard	single exon with low confidence or no Blast hit
chr12	37150668	37150877	+	LL0000032770	XLOC_004836	no Blast hit	low confidence,NP_001137411.1,ZNF534,zinc finger protein 534 isoform 2	1	no	discard	single exon with low confidence or no Blast hit
chr12	37178894	37180104	+	LL0000032771	XLOC_004837	low confidence,XP_009297963.2,LOC101883550,uncharacterized LOC101883550	no Blast hit	1	no	discard	single exon with low confidence or no Blast hit
chr12	38434403	38434648	+	LL0000032772	XLOC_004842	low confidence,XP_003199453.2,LOC100534851,uncharacterized LOC100534851	low confidence,XP_016871086.1,ATE1,arginyl-tRNA--protein transferase 1 isoform X1	1	no	discard	single exon with low confidence or no Blast hit
chr12	38543197	38545255	+	LL0000032773	XLOC_004843	low confidence,NP_001025454.1,ldlra,low density lipoprotein receptor a	no Blast hit	3	no	keep	more than one exon
chr12	38714358	38714936	+	LL0000032774	XLOC_004847	no Blast hit	low confidence,NP_003062.2,HLTF,helicase-like transcription factor isoform 1	1	no	discard	single exon with low confidence or no Blast hit
chr12	41957578	41959374	+	LL0000032775	XLOC_004868	low confidence,XP_021324207.1,LOC101887144,uncharacterized LOC101887144	low confidence,NP_055111.1,CAPN7,calpain-7	9	no	discard	identified as duplicate with existing V4.2/RefSeq annotation
chr12	42763933	42781087	+	LL0000032776	XLOC_004872	matches or overlaps with known lincRNA	no Blast hit	3	yes	keep	maps to previously identified lincRNA
chr12	44846382	44896875	+	LL0000032777	XLOC_004878	exact match,XP_017214063.1,si:ch211-232h12.2,si:ch211-232h12.2, transcript variant X4	moderate confidence,NP_001337850.1,C10orf90,(E2-independent) E3 ubiquitin-conjugating enzyme FATS isoform 1	13	no	keep	moderate confidence BLAST hit to human protein
chr12	46093470	46095238	+	LL0000032778	XLOC_004886	high confidence,XP_021335866.1,LOC108191778,pancreatic secretory granule membrane major glycoprotein GP2-like	low confidence,NP_001007243.2,GP2,pancreatic secretory granule membrane major glycoprotein GP2 isoform 4 precursor	1	no	keep	high/moderate confidence zebrafish BLAST hit
chr12	48707823	48741214	+	LL0000032779	XLOC_004932	matches or overlaps with known lincRNA	low confidence,NP_001307942.1,CTBP2,C-terminal-binding protein 2 isoform 1	3	yes	keep	maps to previously identified lincRNA
chr12	48888221	48897550	+	LL0000032780	XLOC_004936	high confidence,XP_021336127.1,kcnma1b,potassium large conductance calcium-activated channel, subfamily M, alpha member 1b	high confidence,NP_001309767.1,KCNMA1,calcium-activated potassium channel subunit alpha-1 isoform m	5	no	keep	high/moderate confidence zebrafish BLAST hit
chr12	49173322	49178912	+	LL0000032781	XLOC_004944	high confidence,XP_009305285.1,LOC103911968,poly(ADP-ribose) glycohydrolase-like	high confidence,NP_001290418.1,PARG,poly(ADP-ribose) glycohydrolase isoform d	5	no	keep	high/moderate confidence zebrafish BLAST hit
chr12	77540	83818	-	LL0000032782	XLOC_004950	high confidence,NP_001353479.1,dnah9,dynein, axonemal, heavy chain 9	high confidence,XP_016879782.1,DNAH9,dynein heavy chain 9, axonemal isoform X3	7	no	keep	high/moderate confidence zebrafish BLAST hit
chr12	89228	95832	-	LL0000032783	XLOC_004951	exact match,NP_001353479.1,dnah9,dynein, axonemal, heavy chain 9	high confidence,XP_016879782.1,DNAH9,dynein heavy chain 9, axonemal isoform X3	6	no	keep	high confidence BLAST hit to human protein
chr12	89922	90988	-	LL0000032784	XLOC_004952	no Blast hit	no Blast hit	1	no	discard	single exon with low confidence or no Blast hit
chr12	253074	279360	-	LL0000032785	XLOC_004959	low confidence,XP_009289536.1,si:ch211-276i12.9,si:ch211-276i12.9	low confidence,XP_011523945.1,SMCHD1,structural maintenance of chromosomes flexible hinge domain-containing protein 1 isoform X2	2	no	keep	more than one exon
chr12	861778	862609	-	LL0000032786	XLOC_004972	no Blast hit	low confidence,XP_024304604.1,IKBIP,inhibitor of nuclear factor kappa-B kinase-interacting protein isoform X1	1	no	discard	single exon with low confidence or no Blast hit
chr12	873292	878652	-	LL0000032787	XLOC_004973	low confidence,XP_021334472.1,LOC101886383,GRIP and coiled-coil domain-containing protein 2	no Blast hit	2	no	keep	more than one exon
chr12	1036009	1036729	-	LL0000032788	XLOC_004979	low confidence,XP_021335606.1,LOC101886098,Fc receptor-like protein 5, transcript variant X5	no Blast hit	1	no	discard	single exon with low confidence or no Blast hit
chr12	1449679	1450492	-	LL0000032789	XLOC_004986	no Blast hit	low confidence,XP_005248091.1,TMEM128,transmembrane protein 128 isoform X1	1	no	discard	single exon with low confidence or no Blast hit
chr12	1451856	1452945	-	LL0000032790	XLOC_004987	no Blast hit	moderate confidence,XP_011522268.1,NT5M,5'(3')-deoxyribonucleotidase, mitochondrial isoform X8	1	no	keep	moderate confidence BLAST hit to human protein
chr12	1453135	1454160	-	LL0000032791	XLOC_004988	no Blast hit	no Blast hit	1	no	discard	single exon with low confidence or no Blast hit
chr12	1543134	1550237	-	LL0000032792	XLOC_004991	low confidence,XP_021333058.1,LOC101883618,uncharacterized protein PF11_0213-like	no Blast hit	3	no	keep	more than one exon
chr12	1743416	1743856	-	LL0000032793	XLOC_004994	matches or overlaps with known lincRNA	no Blast hit	1	yes	keep	maps to previously identified lincRNA
chr12	1751486	1752286	-	LL0000032794	XLOC_004995	low confidence,XP_021324821.1,LOC101885828,probable E3 ubiquitin-protein ligase HECTD4, transcript variant X1	low confidence,NP_001290418.1,PARG,poly(ADP-ribose) glycohydrolase isoform d	1	no	discard	single exon with low confidence or no Blast hit
chr12	2020851	2021261	-	LL0000032795	XLOC_004997	no Blast hit	no Blast hit	1	no	discard	single exon with low confidence or no Blast hit
chr12	2136097	2169599	-	LL0000032796	XLOC_004998	low confidence,XP_021324012.1,LOC103910150,uncharacterized LOC103910150, transcript variant X2	no Blast hit	2	no	keep	more than one exon
chr12	2769937	2779931	-	LL0000032797	XLOC_005004	low confidence,NP_001025454.1,ldlra,low density lipoprotein receptor a	no Blast hit	8	no	keep	more than one exon
chr12	2940885	2941615	-	LL0000032798	XLOC_005007	low confidence,XP_005157968.1,rusc1,RUN and SH3 domain containing 1, transcript variant X1	low confidence,XP_005251785.1,TTLL11,tubulin polyglutamylase TTLL11 isoform X4	1	no	discard	single exon with low confidence or no Blast hit
chr12	2946593	2948322	-	LL0000032799	XLOC_005008	low confidence,NP_001025454.1,ldlra,low density lipoprotein receptor a	no Blast hit	1	no	discard	single exon with low confidence or no Blast hit
chr12	3277197	3282896	-	LL0000032800	XLOC_005015	exact match,XP_021335881.1,LOC108191691,slit homolog 2 protein-like, transcript variant X2	moderate confidence,NP_056234.2,MXRA5,matrix-remodeling-associated protein 5 precursor	3	no	keep	moderate confidence BLAST hit to human protein
chr12	3558073	3559933	-	LL0000032801	XLOC_005018	no Blast hit	no Blast hit	1	no	discard	single exon with low confidence or no Blast hit
chr12	3559990	3569996	-	LL0000032802	XLOC_005019	exact match,XP_001920424.4,cntd1,cyclin N-terminal domain containing 1	high confidence,XP_005257100.2,CNTD1,cyclin N-terminal domain-containing protein 1 isoform X1	11	no	discard	identified as duplicate with existing V4.2/RefSeq annotation
chr12	3578389	3579410	-	LL0000032803	XLOC_005020	no Blast hit	no Blast hit	1	no	discard	single exon with low confidence or no Blast hit
chr12	3734212	3735257	-	LL0000032804	XLOC_005024	low confidence,XP_009302001.2,gcn1,GCN1 eIF2 alpha kinase activator homolog	low confidence,NP_006827.1,GCN1,eIF-2-alpha kinase activator GCN1	1	no	discard	single exon with low confidence or no Blast hit
chr12	3782636	3784390	-	LL0000032805	XLOC_005026	low confidence,XP_005167475.1,sp3a,sp3a transcription factor, transcript variant X2	no Blast hit	1	no	discard	single exon with low confidence or no Blast hit
chr12	4481019	4486455	-	LL0000032806	XLOC_005048	no Blast hit	no Blast hit	2	no	keep	more than one exon
chr12	4807199	4813907	-	LL0000032807	XLOC_005056	moderate confidence,XP_021328179.1,LOC101885302,mucin-19-like	low confidence,NP_001074259.1,MAGEA9B,melanoma-associated antigen 9	4	no	keep	high/moderate confidence zebrafish BLAST hit
chr12	7516372	7557336	-	LL0000032808	XLOC_005083	high confidence,XP_021335898.1,si:ch73-51i5.2,si:ch73-51i5.2	high confidence,XP_011537793.1,FAM13C,protein FAM13C isoform X4	12	no	keep	high/moderate confidence zebrafish BLAST hit
chr12	10568588	10569727	-	LL0000032809	XLOC_005123	low confidence,XP_009302241.1,si:ch211-196c10.15,si:ch211-196c10.15, transcript variant X2	no Blast hit	1	no	discard	single exon with low confidence or no Blast hit
chr12	10569990	10571742	-	LL0000032810	XLOC_005124	low confidence,NP_001313469.1,tbl1xr1b,transducin (beta)-like 1 X-linked receptor 1b	low confidence,NP_056021.1,KIAA1024,major intrinsically disordered Notch2-binding receptor 1	3	no	keep	more than one exon
chr12	11797133	11798644	-	LL0000032811	XLOC_005134	no Blast hit	no Blast hit	1	no	discard	single exon with low confidence or no Blast hit
chr12	12943815	12952003	-	LL0000032812	XLOC_005137	low confidence,XP_021329215.1,LOC110439112,stonustoxin subunit beta-like	no Blast hit	1	no	discard	single exon with low confidence or no Blast hit
chr12	13183684	13185094	-	LL0000032813	XLOC_005140	moderate confidence,NP_001025454.1,ldlra,low density lipoprotein receptor a	low confidence,XP_005253761.1,PLEKHG6,pleckstrin homology domain-containing family G member 6 isoform X1	1	no	keep	high/moderate confidence zebrafish BLAST hit
chr12	14375446	14376655	-	LL0000032814	XLOC_005157	low confidence,XP_005165376.1,antxr2a,anthrax toxin receptor 2a, transcript variant X1	no Blast hit	1	no	discard	single exon with low confidence or no Blast hit
chr12	14377843	14380457	-	LL0000032815	XLOC_005158	no Blast hit	low confidence,XP_011528629.1,EFCAB6,EF-hand calcium-binding domain-containing protein 6 isoform X12	1	no	discard	single exon with low confidence or no Blast hit
chr12	14474270	14474311	-	LL0000032816	XLOC_005159	low confidence,XP_005162019.1,adrm1,adhesion regulating molecule 1, transcript variant X1	no Blast hit	1	no	discard	single exon with low confidence or no Blast hit
chr12	14853663	14854517	-	LL0000032817	XLOC_005161	no Blast hit	no Blast hit	1	no	discard	single exon with low confidence or no Blast hit
chr12	15035246	15036259	-	LL0000032818	XLOC_005164	low confidence,XP_021331574.1,myo15ab,myosin XVAb	low confidence,XP_011537726.1,DOCK1,dedicator of cytokinesis protein 1 isoform X3	1	no	discard	single exon with low confidence or no Blast hit
chr12	16579322	16583039	-	LL0000032819	XLOC_005179	high confidence,XP_005160831.1,si:dkey-6f10.4,si:dkey-6f10.4	no Blast hit	3	no	keep	high/moderate confidence zebrafish BLAST hit
chr12	16664376	16665520	-	LL0000032820	XLOC_005184	low confidence,XP_021331061.1,LOC110439405,uncharacterized LOC110439405	no Blast hit	1	no	discard	single exon with low confidence or no Blast hit
chr12	17039510	17040508	-	LL0000032821	XLOC_005199	moderate confidence,XP_009302241.1,si:ch211-196c10.15,si:ch211-196c10.15, transcript variant X2	no Blast hit	1	no	keep	high/moderate confidence zebrafish BLAST hit
chr12	17910604	17912032	-	LL0000032822	XLOC_005215	high confidence,XP_017206660.2,LOC567650,protein FAM13A-like	high confidence,XP_024309638.1,FAM13A,protein FAM13A isoform X17	3	no	keep	high/moderate confidence zebrafish BLAST hit
chr12	17913745	17917411	-	LL0000032823	XLOC_005216	low confidence,XP_001344635.2,LOC100005637,uncharacterized LOC100005637	no Blast hit	7	no	keep	more than one exon
chr12	19668319	19669761	-	LL0000032824	XLOC_005238	low confidence,XP_009296319.1,si:dkey-217l24.1,si:dkey-217l24.1, transcript variant X2	no Blast hit	1	no	discard	single exon with low confidence or no Blast hit
chr12	21784218	21788232	-	LL0000032825	XLOC_005256	no Blast hit	no Blast hit	1	no	discard	single exon with low confidence or no Blast hit
chr12	21788815	21791948	-	LL0000032826	XLOC_005257	moderate confidence,XP_005166337.1,mpl,MPL proto-oncogene, thrombopoietin receptor, transcript variant X1	no Blast hit	1	no	keep	high/moderate confidence zebrafish BLAST hit
chr12	24280928	24305775	-	LL0000032827	XLOC_005272	low confidence,NP_001071021.1,zgc:153343,zgc:153343	no Blast hit	5	no	keep	more than one exon
chr12	24288732	24290085	-	LL0000032828	XLOC_005273	no Blast hit	no Blast hit	1	no	discard	single exon with low confidence or no Blast hit
chr12	24295030	24296860	-	LL0000032829	XLOC_005274	low confidence,NP_001106978.1,il23r,interleukin 23 receptor	low confidence,XP_016866293.1,HIVEP1,zinc finger protein 40 isoform X5	1	no	discard	single exon with low confidence or no Blast hit
chr12	24776298	24781083	-	LL0000032830	XLOC_005275	high confidence,XP_021336828.1,LOC110440208,uncharacterized LOC110440208	low confidence,NP_149080.2,ZCCHC3,zinc finger CCHC domain-containing protein 3	1	no	discard	single exon with low confidence or no Blast hit
chr12	24789365	24790387	-	LL0000032831	XLOC_005276	moderate confidence,XP_017214010.2,LOC108191718,golgin subfamily A member 6-like protein 22, transcript variant X1	no Blast hit	2	no	keep	high/moderate confidence zebrafish BLAST hit
chr12	25624933	25624979	-	LL0000032832	XLOC_005289	no Blast hit	no Blast hit	1	no	discard	single exon with low confidence or no Blast hit
chr12	26072871	26079209	-	LL0000032833	XLOC_005294	moderate confidence,NP_001106978.1,il23r,interleukin 23 receptor	no Blast hit	1	no	keep	high/moderate confidence zebrafish BLAST hit
chr12	30877192	30885865	-	LL0000032834	XLOC_005350	low confidence,XP_021331061.1,LOC110439405,uncharacterized LOC110439405	no Blast hit	2	no	keep	more than one exon
chr12	31591652	31599510	-	LL0000032835	XLOC_005357	high confidence,XP_021334421.1,il1rapl1a,interleukin 1 receptor accessory protein-like 1a, transcript variant X6	moderate confidence,XP_016865088.1,GIN1,gypsy retrotransposon integrase-like protein 1 isoform X1	1	no	keep	high/moderate confidence zebrafish BLAST hit
chr12	31904799	31906403	-	LL0000032836	XLOC_005360	no Blast hit	no Blast hit	1	no	discard	single exon with low confidence or no Blast hit
chr12	33824417	33826261	-	LL0000032837	XLOC_005384	low confidence,NP_001032450.1,gpc1a,glypican 1a	no Blast hit	1	no	discard	single exon with low confidence or no Blast hit
chr12	34411465	34412516	-	LL0000032838	XLOC_005392	low confidence,XP_697903.2,si:ch211-173a9.7,si:ch211-173a9.7	no Blast hit	1	no	discard	single exon with low confidence or no Blast hit
chr12	35951956	35953001	-	LL0000032839	XLOC_005417	low confidence,XP_009289536.1,si:ch211-276i12.9,si:ch211-276i12.9	low confidence,NP_001245379.1,PKMYT1,membrane-associated tyrosine- and threonine-specific cdc2-inhibitory kinase isoform 3	1	no	discard	single exon with low confidence or no Blast hit
chr12	37386563	37390929	-	LL0000032840	XLOC_005432	low confidence,XP_003200160.3,LOC100332535,uncharacterized LOC100332535	no Blast hit	4	no	keep	more than one exon
chr12	37931151	37932102	-	LL0000032841	XLOC_005438	low confidence,NP_001161430.1,wdr89,WD repeat domain 89	no Blast hit	1	no	discard	single exon with low confidence or no Blast hit
chr12	38428112	38429869	-	LL0000032842	XLOC_005442	high confidence,XP_021331018.1,LOC110439387,gastrula zinc finger protein XlCGF28.1-like	no Blast hit	1	no	keep	high/moderate confidence zebrafish BLAST hit
chr12	38519990	38527390	-	LL0000032843	XLOC_005443	exact match,XP_021336077.1,si:dkey-264b2.3,si:dkey-264b2.3, transcript variant X1	low confidence,NP_068743.3,CDHR5,cadherin-related family member 5 isoform 1 precursor	3	no	keep	exact match BLAST hit with zebrafish protein
chr12	39456168	39457764	-	LL0000032844	XLOC_005448	high confidence,XP_021333650.1,LOC108190717,uncharacterized LOC108190717	low confidence,NP_997465.1,ERVFRD-1,syncytin-2 preproprotein	1	no	keep	high/moderate confidence zebrafish BLAST hit
chr12	39458084	39460529	-	LL0000032845	XLOC_005449	high confidence,XP_021327693.1,LOC108190699,transposon Tf2-1 polyprotein, transcript variant X2	high confidence,XP_016864593.1,TMEM161B,transmembrane protein 161B isoform X12	1	no	keep	high/moderate confidence zebrafish BLAST hit
chr12	41120480	41122312	-	LL0000032846	XLOC_005453	low confidence,XP_009290669.2,npr1b,natriuretic peptide receptor 1b	no Blast hit	1	no	discard	single exon with low confidence or no Blast hit
chr12	41281238	41281374	-	LL0000032847	XLOC_005454	low confidence,NP_001122029.1,lcmt2,leucine carboxyl methyltransferase 2	no Blast hit	1	no	discard	single exon with low confidence or no Blast hit
chr12	41377134	41377207	-	LL0000032848	XLOC_005455	low confidence,XP_005163413.1,plcd1b,phospholipase C, delta 1b, transcript variant X1	low confidence,NP_001728.1,C9,complement component C9 preproprotein	1	no	discard	single exon with low confidence or no Blast hit
chr12	41383564	41383637	-	LL0000032849	XLOC_005477	low confidence,XP_021323155.1,tiam2a,T-cell lymphoma invasion and metastasis 2a, transcript variant X2	no Blast hit	1	no	discard	single exon with low confidence or no Blast hit
chr12	42423244	42424970	-	LL0000032850	XLOC_005577	no Blast hit	no Blast hit	1	no	discard	single exon with low confidence or no Blast hit
chr12	42425882	42428004	-	LL0000032851	XLOC_005578	no Blast hit	no Blast hit	1	no	discard	single exon with low confidence or no Blast hit
chr12	43149001	43149922	-	LL0000032852	XLOC_005580	moderate confidence,NP_001025454.1,ldlra,low density lipoprotein receptor a	no Blast hit	1	no	keep	high/moderate confidence zebrafish BLAST hit
chr12	43648858	43649025	-	LL0000032853	XLOC_005585	low confidence,XP_017207876.1,LOC100536156,venom phosphodiesterase 1-like	low confidence,NP_109590.3,RAI1,retinoic acid-induced protein 1	1	no	discard	single exon with low confidence or no Blast hit
chr12	45440143	45442956	-	LL0000032854	XLOC_005605	high confidence,XP_003199701.1,LOC100535892,uncharacterized LOC100535892	no Blast hit	4	no	keep	high/moderate confidence zebrafish BLAST hit
chr12	45504185	45507933	-	LL0000032855	XLOC_005608	low confidence,XP_021332054.1,LOC563292,zinc finger Y-chromosomal protein 1-like, transcript variant X2	no Blast hit	1	no	discard	single exon with low confidence or no Blast hit
chr12	45508042	45510010	-	LL0000032856	XLOC_005609	no Blast hit	no Blast hit	1	no	discard	single exon with low confidence or no Blast hit
chr12	45559725	45561113	-	LL0000032857	XLOC_005611	low confidence,XP_017212350.1,si:dkey-88n24.6,si:dkey-88n24.6, transcript variant X2	no Blast hit	1	no	discard	single exon with low confidence or no Blast hit
chr12	45576973	45657996	-	LL0000032858	XLOC_005612	high confidence,XP_021336102.1,LOC103911953,uncharacterized LOC103911953	moderate confidence,XP_016871923.1,PSD,PH and SEC7 domain-containing protein 1 isoform X1	16	no	keep	high/moderate confidence zebrafish BLAST hit
chr12	45795008	45799397	-	LL0000032859	XLOC_005615	moderate confidence,NP_001106978.1,il23r,interleukin 23 receptor	no Blast hit	5	no	keep	high/moderate confidence zebrafish BLAST hit
chr12	47865569	47867098	-	LL0000032860	XLOC_005640	low confidence,XP_017213105.1,ephb3a,eph receptor B3a, transcript variant X2	no Blast hit	1	no	discard	single exon with low confidence or no Blast hit
chr12	48288762	48289447	-	LL0000032861	XLOC_005644	low confidence,XP_021329333.1,ubr4,ubiquitin protein ligase E3 component n-recognin 4, transcript variant X14	no Blast hit	1	no	discard	single exon with low confidence or no Blast hit
chr12	48414413	48416496	-	LL0000032862	XLOC_005647	low confidence,XP_009301374.1,si:ch211-212k18.4,si:ch211-212k18.4, transcript variant X5	no Blast hit	3	no	keep	more than one exon
chr12	49039328	49040329	-	LL0000032863	XLOC_005658	no Blast hit	no Blast hit	1	no	discard	single exon with low confidence or no Blast hit
chr12	49041036	49043296	-	LL0000032864	XLOC_005659	low confidence,XP_021336319.1,kcnma1a,potassium large conductance calcium-activated channel, subfamily M, alpha member 1a, transcript variant X35	low confidence,XP_024303755.1,KCNMA1,calcium-activated potassium channel subunit alpha-1 isoform X36	1	no	discard	single exon with low confidence or no Blast hit
chr12	49045561	49048588	-	LL0000032865	XLOC_005660	no Blast hit	no Blast hit	2	no	keep	more than one exon
chr13	2301	4014	+	LL0000032866	XLOC_005673	high confidence,XP_009305287.1,LOC103911969,serine/threonine-protein phosphatase 4 regulatory subunit 3-like	high confidence,XP_016860025.1,PPP4R3B,serine/threonine-protein phosphatase 4 regulatory subunit 3B isoform X12	5	no	discard	identified as duplicate with existing V4.2/RefSeq annotation
chr13	6974	7870	+	LL0000032867	XLOC_005675	no Blast hit	no Blast hit	1	no	discard	single exon with low confidence or no Blast hit
chr13	19018	20692	+	LL0000032868	XLOC_005677	high confidence,XP_017209909.1,ccdc88ab,coiled-coil domain containing 88Ab, transcript variant X2	low confidence,XP_011531269.1,CCDC88A,girdin isoform X9	2	no	keep	high/moderate confidence zebrafish BLAST hit
chr13	493220	495741	+	LL0000032869	XLOC_005694	no Blast hit	low confidence,NP_001317547.1,CYHR1,cysteine and histidine-rich protein 1 isoform 3	1	no	discard	single exon with low confidence or no Blast hit
chr13	1214597	1215781	+	LL0000032870	XLOC_005710	no Blast hit	no Blast hit	1	no	discard	single exon with low confidence or no Blast hit
chr13	2502130	2506979	+	LL0000032871	XLOC_005726	high confidence,XP_009289536.1,si:ch211-276i12.9,si:ch211-276i12.9	no Blast hit	1	no	keep	high/moderate confidence zebrafish BLAST hit
chr13	2510472	2515815	+	LL0000032872	XLOC_005727	low confidence,NP_001074053.2,mavs,mitochondrial antiviral signaling protein, transcript variant 2	low confidence,NP_001355092.1,SMIM28,small integral membrane protein 28	2	no	keep	more than one exon
chr13	2668150	2676386	+	LL0000032873	XLOC_005730	low confidence,NP_001106978.1,il23r,interleukin 23 receptor	no Blast hit	1	no	discard	single exon with low confidence or no Blast hit
chr13	2905117	2905954	+	LL0000032874	XLOC_005735	low confidence,XP_021330228.1,gb:co360592,expressed sequence CO360592, transcript variant X5	no Blast hit	1	no	discard	single exon with low confidence or no Blast hit
chr13	3846049	3848915	+	LL0000032875	XLOC_005740	no Blast hit	no Blast hit	1	no	discard	single exon with low confidence or no Blast hit
chr13	3849038	3850915	+	LL0000032876	XLOC_005741	low confidence,XP_021333112.1,bco1l,beta-carotene oxygenase 1, like, transcript variant X1	no Blast hit	1	no	discard	single exon with low confidence or no Blast hit
chr13	4217764	4217987	+	LL0000032877	XLOC_005748	low confidence,XP_009302946.1,aff3,AF4/FMR2 family, member 3	low confidence,XP_016857971.1,TOMM40L,mitochondrial import receptor subunit TOM40B isoform X2	1	no	discard	single exon with low confidence or no Blast hit
chr13	4455932	4457631	+	LL0000032878	XLOC_005753	no Blast hit	no Blast hit	1	no	discard	single exon with low confidence or no Blast hit
chr13	5463652	5471443	+	LL0000032879	XLOC_005762	low confidence,NP_001076514.1,sphkap,SPHK1 interactor, AKAP domain containing	no Blast hit	1	no	discard	single exon with low confidence or no Blast hit
chr13	5718150	5718588	+	LL0000032880	XLOC_005764	low confidence,XP_021332721.1,dock9b,dedicator of cytokinesis 9b, transcript variant X9	low confidence,XP_005256637.1,PIK3R5,phosphoinositide 3-kinase regulatory subunit 5 isoform X1	1	no	discard	single exon with low confidence or no Blast hit
chr13	5718785	5719640	+	LL0000032881	XLOC_005765	no Blast hit	no Blast hit	1	no	discard	single exon with low confidence or no Blast hit
chr13	5720144	5721863	+	LL0000032882	XLOC_005766	low confidence,XP_021334165.1,gpr153,G protein-coupled receptor 153, transcript variant X5	no Blast hit	1	no	discard	single exon with low confidence or no Blast hit
chr13	6126163	6131495	+	LL0000032883	XLOC_005769	high confidence,XP_009289536.1,si:ch211-276i12.9,si:ch211-276i12.9	no Blast hit	2	no	keep	high/moderate confidence zebrafish BLAST hit
chr13	6243729	6245059	+	LL0000032884	XLOC_005774	no Blast hit	no Blast hit	1	no	discard	single exon with low confidence or no Blast hit
chr13	6254690	6256607	+	LL0000032885	XLOC_005775	no Blast hit	low confidence,XP_005268796.1,UHRF1BP1L,UHRF1-binding protein 1-like isoform X3	1	no	discard	single exon with low confidence or no Blast hit
chr13	6819699	6829173	+	LL0000032886	XLOC_005779	high confidence,XP_017207803.1,si:ch211-233f16.1,si:ch211-233f16.1, transcript variant X2	high confidence,XP_011533054.1,CSMD1,CUB and sushi domain-containing protein 1 isoform X1	4	no	keep	high/moderate confidence zebrafish BLAST hit
chr13	7939127	7939571	+	LL0000032887	XLOC_005793	no Blast hit	low confidence,NP_001354673.1,RABGEF1,rab5 GDP/GTP exchange factor isoform f precursor	1	no	discard	single exon with low confidence or no Blast hit
chr13	8077690	8096092	+	LL0000032888	XLOC_005794	no Blast hit	no Blast hit	2	no	keep	more than one exon
chr13	8094064	8095291	+	LL0000032889	XLOC_005795	low confidence,XP_021321960.1,brip1,BRCA1 interacting protein C-terminal helicase 1, transcript variant X3	no Blast hit	1	no	discard	single exon with low confidence or no Blast hit
chr13	8100261	8102907	+	LL0000032890	XLOC_005796	no Blast hit	no Blast hit	1	no	discard	single exon with low confidence or no Blast hit
chr13	8103326	8104948	+	LL0000032891	XLOC_005797	no Blast hit	no Blast hit	1	no	discard	single exon with low confidence or no Blast hit
chr13	9764220	9766883	+	LL0000032892	XLOC_005831	low confidence,NP_001116088.1,zgc:171435,zgc:171435	no Blast hit	1	no	discard	single exon with low confidence or no Blast hit
chr13	12684967	12687707	+	LL0000032893	XLOC_005865	high confidence,XP_021325357.1,LOC110438296,muscle M-line assembly protein unc-89-like	no Blast hit	1	no	keep	high/moderate confidence zebrafish BLAST hit
chr13	13106452	13108833	+	LL0000032894	XLOC_005870	no Blast hit	low confidence,NP_619543.2,STEAP3,metalloreductase STEAP3 isoform c	1	no	discard	single exon with low confidence or no Blast hit
chr13	15433766	15435547	+	LL0000032895	XLOC_005893	high confidence,XP_017212591.2,LOC108179210,uncharacterized LOC108179210	low confidence,NP_001949.1,EEF1A2,elongation factor 1-alpha 2	1	no	keep	high/moderate confidence zebrafish BLAST hit
chr13	15448598	15449970	+	LL0000032896	XLOC_005894	high confidence,XP_021331267.1,LOC110439519,uncharacterized LOC110439519	low confidence,NP_079357.2,NYNRIN,protein NYNRIN	1	no	keep	high/moderate confidence zebrafish BLAST hit
chr13	15570473	15572182	+	LL0000032897	XLOC_005895	low confidence,XP_693582.3,si:ch211-146m13.3,si:ch211-146m13.3	no Blast hit	3	no	keep	more than one exon
chr13	16329201	16331144	+	LL0000032898	XLOC_005905	matches or overlaps with known lincRNA	no Blast hit	1	yes	keep	maps to previously identified lincRNA
chr13	17689024	17690335	+	LL0000032899	XLOC_005911	low confidence,NP_001038409.1,jtb,jumping translocation breakpoint	no Blast hit	1	no	discard	single exon with low confidence or no Blast hit
chr13	18327452	18328543	+	LL0000032900	XLOC_005917	no Blast hit	no Blast hit	1	no	discard	single exon with low confidence or no Blast hit
chr13	20935026	20939107	+	LL0000032901	XLOC_005945	low confidence,XP_021327787.1,LOC103910200,sterile alpha motif domain-containing protein 9-like	no Blast hit	1	no	discard	single exon with low confidence or no Blast hit
chr13	22466464	22467571	+	LL0000032902	XLOC_005961	low confidence,XP_009305531.1,dlg5a,discs, large homolog 5a (Drosophila), transcript variant X3	no Blast hit	1	no	discard	single exon with low confidence or no Blast hit
chr13	22467675	22468898	+	LL0000032903	XLOC_005962	no Blast hit	no Blast hit	1	no	discard	single exon with low confidence or no Blast hit
chr13	24060077	24065165	+	LL0000032904	XLOC_005982	moderate confidence,XP_021328859.1,grid1a,glutamate receptor, ionotropic, delta 1a, transcript variant X4	no Blast hit	1	no	keep	high/moderate confidence zebrafish BLAST hit
chr13	24066919	24068510	+	LL0000032905	XLOC_005983	high confidence,XP_009289536.1,si:ch211-276i12.9,si:ch211-276i12.9	low confidence,NP_001073908.2,HSF5,heat shock factor protein 5	1	no	keep	high/moderate confidence zebrafish BLAST hit
chr13	24416754	24417300	+	LL0000032906	XLOC_005990	low confidence,NP_001108613.1,dhx15,DEAH (Asp-Glu-Ala-His) box helicase 15	no Blast hit	1	no	discard	single exon with low confidence or no Blast hit
chr13	27832226	27832963	+	LL0000032907	XLOC_006034	no Blast hit	no Blast hit	1	no	discard	single exon with low confidence or no Blast hit
chr13	27847380	27847451	+	LL0000032908	XLOC_006058	low confidence,XP_021323717.1,abcf1,ATP-binding cassette, sub-family F (GCN20), member 1, transcript variant X2	no Blast hit	1	no	discard	single exon with low confidence or no Blast hit
chr13	29045128	29046486	+	LL0000032909	XLOC_006087	no Blast hit	no Blast hit	1	no	discard	single exon with low confidence or no Blast hit
chr13	29983976	29984391	+	LL0000032910	XLOC_006099	low confidence,NP_001025454.1,ldlra,low density lipoprotein receptor a	no Blast hit	1	no	discard	single exon with low confidence or no Blast hit
chr13	31955215	31978497	+	LL0000032911	XLOC_006133	low confidence,XP_021334698.1,LOC101882148,uncharacterized LOC101882148, transcript variant X5	no Blast hit	12	no	discard	identified as duplicate with existing V4.2/RefSeq annotation
chr13	33322851	33330627	+	LL0000032912	XLOC_006152	high confidence,NP_001121748.1,zgc:172120,zgc:172120	moderate confidence,NP_001316558.1,CD276,CD276 antigen isoform c	2	no	keep	high/moderate confidence zebrafish BLAST hit
chr13	38282949	38284263	+	LL0000032913	XLOC_006192	no Blast hit	no Blast hit	1	no	discard	single exon with low confidence or no Blast hit
chr13	39232290	39234842	+	LL0000032914	XLOC_006197	low confidence,XP_021322008.1,p4ha3,prolyl 4-hydroxylase, alpha polypeptide III, transcript variant X1	no Blast hit	2	no	keep	more than one exon
chr13	40988325	40989355	+	LL0000032915	XLOC_006216	no Blast hit	no Blast hit	3	no	keep	more than one exon
chr13	41688419	41691968	+	LL0000032916	XLOC_006218	moderate confidence,XP_009302434.2,LOC101882501,SET domain-containing protein 5-like	low confidence,NP_001354318.1,KMT5A,N-lysine methyltransferase KMT5A isoform 4	8	no	discard	identified as duplicate with existing V4.2/RefSeq annotation
chr13	41696944	41698329	+	LL0000032917	XLOC_006219	low confidence,XP_009294624.2,LOC100331776,uncharacterized LOC100331776, transcript variant X1	low confidence,NP_000787.2,DRD3,D(3) dopamine receptor isoform a	2	no	discard	identified as duplicate with existing V4.2/RefSeq annotation
chr13	41859768	41862881	+	LL0000032918	XLOC_006221	low confidence,XP_002663431.2,si:ch73-7i4.2,si:ch73-7i4.2	no Blast hit	7	no	discard	identified as duplicate with existing V4.2/RefSeq annotation
chr13	42475947	42479186	+	LL0000032919	XLOC_006229	no Blast hit	no Blast hit	1	no	discard	single exon with low confidence or no Blast hit
chr13	42539635	42540361	+	LL0000032920	XLOC_006230	low confidence,XP_684556.5,si:dkey-215k6.1,si:dkey-215k6.1	low confidence,XP_005245535.1,CACNA1S,voltage-dependent L-type calcium channel subunit alpha-1S isoform X1	1	no	discard	single exon with low confidence or no Blast hit
chr13	43216292	43221100	+	LL0000032921	XLOC_006235	low confidence,NP_001018589.1,prep,prolyl endopeptidase	no Blast hit	1	no	discard	single exon with low confidence or no Blast hit
chr13	45660509	45663427	+	LL0000032922	XLOC_006252	low confidence,NP_001038409.1,jtb,jumping translocation breakpoint	no Blast hit	1	no	discard	single exon with low confidence or no Blast hit
chr13	46000672	46002064	+	LL0000032923	XLOC_006258	low confidence,XP_021333058.1,LOC101883618,uncharacterized protein PF11_0213-like	no Blast hit	2	no	keep	more than one exon
chr13	47182979	47184223	+	LL0000032924	XLOC_006267	no Blast hit	low confidence,NP_001291276.1,OLFM2,noelin-2 isoform 1	1	no	discard	single exon with low confidence or no Blast hit
chr13	47189010	47274446	+	LL0000032925	XLOC_006268	no Blast hit	no Blast hit	2	no	keep	more than one exon
chr13	47191705	47194692	+	LL0000032926	XLOC_006269	low confidence,XP_695016.2,LOC566646,uncharacterized LOC566646, transcript variant X1	low confidence,XP_016858358.1,CD58,lymphocyte function-associated antigen 3 isoform X1	1	no	discard	single exon with low confidence or no Blast hit
chr13	47694452	47706850	+	LL0000032927	XLOC_006273	low confidence,NP_001082853.2,zgc:162698,zgc:162698	moderate confidence,NP_001316843.1,TMEM87B,transmembrane protein 87B isoform 2 precursor	4	no	keep	moderate confidence BLAST hit to human protein
chr13	47735584	47737140	+	LL0000032928	XLOC_006275	low confidence,NP_001116088.1,zgc:171435,zgc:171435	low confidence,XP_011522227.1,TRPV2,transient receptor potential cation channel subfamily V member 2 isoform X11	1	no	discard	single exon with low confidence or no Blast hit
chr13	48568400	48579218	+	LL0000032929	XLOC_006282	low confidence,NP_001306200.1,clcn2c,chloride channel 2c	low confidence,XP_006724828.1,ZNF280C,zinc finger protein 280C isoform X1	2	no	keep	more than one exon
chr13	48679121	48729231	+	LL0000032930	XLOC_006283	exact match,XP_017214347.1,LOC100149084,uncharacterized LOC100149084, transcript variant X3	moderate confidence,NP_003119.2,SPTBN1,spectrin beta chain, non-erythrocytic 1 isoform 1	18	no	keep	moderate confidence BLAST hit to human protein
chr13	48729677	48733015	+	LL0000032931	XLOC_006284	low confidence,XP_021335606.1,LOC101886098,Fc receptor-like protein 5, transcript variant X5	no Blast hit	1	no	discard	single exon with low confidence or no Blast hit
chr13	50470862	50471463	+	LL0000032932	XLOC_006295	high confidence,NP_001003650.1,ufc1,ubiquitin-fold modifier conjugating enzyme 1	high confidence,XP_016856940.1,UFC1,ubiquitin-fold modifier-conjugating enzyme 1 isoform X1	1	no	keep	high/moderate confidence zebrafish BLAST hit
chr13	52157023	52157309	+	LL0000032933	XLOC_006316	high confidence,NP_956248.1,klc1b,kinesin light chain 1b	high confidence,NP_005543.2,KLC1,kinesin light chain 1 isoform 1	1	no	keep	high/moderate confidence zebrafish BLAST hit
chr13	52159729	52161134	+	LL0000032934	XLOC_006317	low confidence,NP_001025336.1,march4,membrane-associated ring finger (C3HC4) 4	low confidence,XP_016869375.1,SLCO5A1,solute carrier organic anion transporter family member 5A1 isoform X5	2	no	keep	more than one exon
chr13	52165650	52166882	+	LL0000032935	XLOC_006318	no Blast hit	no Blast hit	1	no	discard	single exon with low confidence or no Blast hit
chr13	52169833	52173206	+	LL0000032936	XLOC_006319	matches or overlaps with known lincRNA	no Blast hit	3	yes	keep	maps to previously identified lincRNA
chr13	52173433	52174371	+	LL0000032937	XLOC_006320	low confidence,XP_017211738.1,si:ch211-135f11.1,si:ch211-135f11.1, transcript variant X4	no Blast hit	1	no	discard	single exon with low confidence or no Blast hit
chr13	25023	29374	-	LL0000032938	XLOC_006321	low confidence,XP_021330274.1,si:ch73-194h10.3,si:ch73-194h10.3	no Blast hit	1	no	discard	single exon with low confidence or no Blast hit
chr13	29501	30849	-	LL0000032939	XLOC_006322	no Blast hit	no Blast hit	1	no	discard	single exon with low confidence or no Blast hit
chr13	231492	232437	-	LL0000032940	XLOC_006330	low confidence,XP_005173028.1,dpysl4,dihydropyrimidinase-like 4, transcript variant X2	no Blast hit	3	no	keep	more than one exon
chr13	857309	858904	-	LL0000032941	XLOC_006345	moderate confidence,NP_001106978.1,il23r,interleukin 23 receptor	no Blast hit	1	no	keep	high/moderate confidence zebrafish BLAST hit
chr13	1341222	1341846	-	LL0000032942	XLOC_006353	low confidence,NP_001314794.1,si:ch73-52p7.1,si:ch73-52p7.1	low confidence,XP_016869462.1,PKHD1L1,fibrocystin-L isoform X6	1	no	discard	single exon with low confidence or no Blast hit
chr13	2224398	2241612	-	LL0000032943	XLOC_006361	high confidence,XP_017214410.1,LOC108192008,protein scribble homolog, transcript variant X2	moderate confidence,NP_874365.3,SCRIB,protein scribble homolog isoform a	6	no	discard	identified as duplicate with existing V4.2/RefSeq annotation
chr13	2707964	2709921	-	LL0000032944	XLOC_006367	low confidence,XP_021325075.1,znf1157,zinc finger protein 1157, transcript variant X4	no Blast hit	4	no	keep	more than one exon
chr13	2919224	2923809	-	LL0000032945	XLOC_006371	low confidence,XP_001921439.4,plekhh2,pleckstrin homology domain containing, family H (with MyTH4 domain) member 2	no Blast hit	1	no	discard	single exon with low confidence or no Blast hit
chr13	2924247	2924783	-	LL0000032946	XLOC_006372	low confidence,XP_009295479.1,si:ch1073-59l16.1,si:ch1073-59l16.1, transcript variant X2	low confidence,XP_011507657.1,SRGAP2,SLIT-ROBO Rho GTPase-activating protein 2 isoform X2	1	no	discard	single exon with low confidence or no Blast hit
chr13	2991701	2992043	-	LL0000032947	XLOC_006374	no Blast hit	no Blast hit	1	no	discard	single exon with low confidence or no Blast hit
chr13	5358713	5360290	-	LL0000032948	XLOC_006397	low confidence,XP_021328754.1,rab32b,RAB32b, member RAS oncogene family, transcript variant X1	no Blast hit	1	no	discard	single exon with low confidence or no Blast hit
chr13	5360400	5362259	-	LL0000032949	XLOC_006398	low confidence,XP_021330055.1,LOC110439213,glutamate receptor ionotropic, delta-1-like	no Blast hit	1	no	discard	single exon with low confidence or no Blast hit
chr13	6789910	6790169	-	LL0000032950	XLOC_006412	low confidence,XP_009301629.1,abcc12,ATP-binding cassette, sub-family C (CFTR/MRP), member 12	no Blast hit	1	no	discard	single exon with low confidence or no Blast hit
chr13	9326860	9328278	-	LL0000032951	XLOC_006442	low confidence,NP_001082866.1,dph2,DPH2 homolog (S. cerevisiae)	low confidence,XP_011546433.1,LOC105374299,uncharacterized protein LOC105374299	1	no	discard	single exon with low confidence or no Blast hit
chr13	9609844	9611200	-	LL0000032952	XLOC_006453	low confidence,NP_001025454.1,ldlra,low density lipoprotein receptor a	no Blast hit	1	no	discard	single exon with low confidence or no Blast hit
chr13	9886831	9887320	-	LL0000032953	XLOC_006457	no Blast hit	no Blast hit	1	no	discard	single exon with low confidence or no Blast hit
chr13	12989010	12990905	-	LL0000032954	XLOC_006497	low confidence,NP_001004521.3,si:busm1-266f07.2,si:busm1-266f07.2 precursor	no Blast hit	6	no	discard	identified as duplicate with existing V4.2/RefSeq annotation
chr13	13470754	13473130	-	LL0000032955	XLOC_006500	high confidence,XP_021323083.1,LOC110438040,uncharacterized LOC110438040	no Blast hit	1	no	keep	high/moderate confidence zebrafish BLAST hit
chr13	14717692	14718259	-	LL0000032956	XLOC_006508	high confidence,NP_998675.1,gyg1a,glycogenin 1a	high confidence,XP_016861764.1,GYG1,glycogenin-1 isoform X1	1	no	keep	high/moderate confidence zebrafish BLAST hit
chr13	14949821	14951383	-	LL0000032957	XLOC_006511	high confidence,XP_021325913.1,LOC110438340,uncharacterized LOC110438340	low confidence,NP_079357.2,NYNRIN,protein NYNRIN	1	no	keep	high/moderate confidence zebrafish BLAST hit
chr13	15145364	15148969	-	LL0000032958	XLOC_006514	low confidence,XP_021331752.1,LOC110437782,piggyBac transposable element-derived protein 4-like, transcript variant X3	no Blast hit	1	no	discard	single exon with low confidence or no Blast hit
chr13	15423822	15432565	-	LL0000032959	XLOC_006515	high confidence,XP_021330692.1,pfkfb3,6-phosphofructo-2-kinase/fructose-2,6-biphosphatase 3, transcript variant X3	no Blast hit	3	no	keep	high/moderate confidence zebrafish BLAST hit
chr13	15913104	15914270	-	LL0000032960	XLOC_006520	low confidence,XP_021321960.1,brip1,BRCA1 interacting protein C-terminal helicase 1, transcript variant X3	low confidence,NP_005331.1,HINT1,histidine triad nucleotide-binding protein 1	1	no	discard	single exon with low confidence or no Blast hit
chr13	16211257	16213159	-	LL0000032961	XLOC_006525	moderate confidence,XP_021331752.1,LOC110437782,piggyBac transposable element-derived protein 4-like, transcript variant X3	no Blast hit	1	no	keep	high/moderate confidence zebrafish BLAST hit
chr13	16500219	16502420	-	LL0000032962	XLOC_006529	low confidence,XP_009296561.1,LOC103909931,utrophin-like	low confidence,NP_001358230.1,DYRK4,dual specificity tyrosine-phosphorylation-regulated kinase 4 isoform 4	1	no	discard	single exon with low confidence or no Blast hit
chr13	16919049	16919934	-	LL0000032963	XLOC_006530	low confidence,NP_001007284.3,dio1,deiodinase, iodothyronine, type I, transcript variant 1	no Blast hit	1	no	discard	single exon with low confidence or no Blast hit
chr13	19216978	19217946	-	LL0000032964	XLOC_006549	no Blast hit	no Blast hit	1	no	discard	single exon with low confidence or no Blast hit
chr13	19274433	19275652	-	LL0000032965	XLOC_006550	no Blast hit	no Blast hit	1	no	discard	single exon with low confidence or no Blast hit
chr13	20564133	20565563	-	LL0000032966	XLOC_006559	low confidence,XP_001341412.1,apcdd1l,adenomatosis polyposis coli down-regulated 1-like	no Blast hit	1	no	discard	single exon with low confidence or no Blast hit
chr13	20565700	20569976	-	LL0000032967	XLOC_006560	low confidence,NP_001106978.1,il23r,interleukin 23 receptor	low confidence,XP_024301910.1,RASGRF2,ras-specific guanine nucleotide-releasing factor 2 isoform X5	1	no	discard	single exon with low confidence or no Blast hit
chr13	20570138	20573011	-	LL0000032968	XLOC_006561	moderate confidence,NP_001003734.1,harbi1,harbinger transposase derived 1	moderate confidence,XP_016873095.1,HARBI1,putative nuclease HARBI1 isoform X2	1	no	keep	high/moderate confidence zebrafish BLAST hit
chr13	20877854	20878029	-	LL0000032969	XLOC_006563	low confidence,XP_694497.5,gabbr1a,gamma-aminobutyric acid (GABA) B receptor, 1a	low confidence,XP_011539277.1,EPHA8,ephrin type-A receptor 8 isoform X2	1	no	discard	single exon with low confidence or no Blast hit
chr13	22468259	22475330	-	LL0000032970	XLOC_006573	moderate confidence,NP_001164503.1,si:rp71-36n21.1,si:rp71-36n21.1	no Blast hit	1	no	keep	high/moderate confidence zebrafish BLAST hit
chr13	24365371	24367165	-	LL0000032971	XLOC_006603	no Blast hit	low confidence,NP_001295140.1,EARS2,probable glutamate--tRNA ligase, mitochondrial isoform 2	1	no	discard	single exon with low confidence or no Blast hit
chr13	24572129	24576460	-	LL0000032972	XLOC_006609	no Blast hit	low confidence,NP_001007254.2,ERV3-1,endogenous retrovirus group 3 member 1 Env polyprotein precursor	6	no	keep	more than one exon
chr13	25776382	25779613	-	LL0000032973	XLOC_006630	high confidence,XP_021331236.1,LOC101885800,uncharacterized LOC101885800	low confidence,NP_001354318.1,KMT5A,N-lysine methyltransferase KMT5A isoform 4	4	no	keep	high/moderate confidence zebrafish BLAST hit
chr13	27875524	27876095	-	LL0000032974	XLOC_006642	low confidence,XP_003201490.2,si:dkey-217l24.1,si:dkey-217l24.1, transcript variant X1	low confidence,NP_001092759.1,SH3RF3,E3 ubiquitin-protein ligase SH3RF3 precursor	1	no	discard	single exon with low confidence or no Blast hit
chr13	30972809	30974800	-	LL0000032975	XLOC_006678	no Blast hit	low confidence,XP_016863509.1,FBXO8,F-box only protein 8 isoform X1	1	no	discard	single exon with low confidence or no Blast hit
chr13	31339834	31340923	-	LL0000032976	XLOC_006685	no Blast hit	no Blast hit	1	no	discard	single exon with low confidence or no Blast hit
chr13	31627843	31629127	-	LL0000032977	XLOC_006694	low confidence,XP_017207441.1,myo9b,myosin IXb, transcript variant X3	no Blast hit	1	no	discard	single exon with low confidence or no Blast hit
chr13	31916604	31917647	-	LL0000032978	XLOC_006701	no Blast hit	no Blast hit	1	no	discard	single exon with low confidence or no Blast hit
chr13	31919103	31920976	-	LL0000032979	XLOC_006702	low confidence,NP_001012244.2,zpcx,zona pellucida protein C	low confidence,XP_005256451.1,DUS1L,tRNA-dihydrouridine(16/17) synthase [NAD(P)(+)]-like isoform X8	1	no	discard	single exon with low confidence or no Blast hit
chr13	31921127	31922240	-	LL0000032980	XLOC_006703	no Blast hit	low confidence,XP_005265058.2,KLHL18,kelch-like protein 18 isoform X1	1	no	discard	single exon with low confidence or no Blast hit
chr13	32277386	32279606	-	LL0000032981	XLOC_006707	no Blast hit	no Blast hit	1	no	discard	single exon with low confidence or no Blast hit
chr13	33588062	33590261	-	LL0000032982	XLOC_006732	low confidence,NP_001093542.1,LOC100001550,uncharacterized LOC100001550	low confidence,XP_011542822.1,IKBKB,inhibitor of nuclear factor kappa-B kinase subunit beta isoform X4	1	no	discard	single exon with low confidence or no Blast hit
chr13	34943857	34943936	-	LL0000032983	XLOC_006748	no Blast hit	no Blast hit	1	no	discard	single exon with low confidence or no Blast hit
chr13	35021002	35022297	-	LL0000032984	XLOC_006749	low confidence,XP_021321960.1,brip1,BRCA1 interacting protein C-terminal helicase 1, transcript variant X3	no Blast hit	1	no	discard	single exon with low confidence or no Blast hit
chr13	35111777	35153088	-	LL0000032985	XLOC_006751	exact match,XP_021336555.1,LOC101882067,uncharacterized LOC101882067	no Blast hit	16	no	discard	identified as duplicate with existing V4.2/RefSeq annotation
chr13	36440990	36441910	-	LL0000032986	XLOC_006778	low confidence,XP_003201390.1,si:ch211-253b1.3,si:ch211-253b1.3	no Blast hit	1	no	discard	single exon with low confidence or no Blast hit
chr13	36442012	36443345	-	LL0000032987	XLOC_006779	low confidence,NP_001121732.1,cdk14,cyclin-dependent kinase 14	no Blast hit	1	no	discard	single exon with low confidence or no Blast hit
chr13	37485855	37487011	-	LL0000032988	XLOC_006800	low confidence,XP_003198330.2,si:ch211-265o23.1,si:ch211-265o23.1	no Blast hit	1	no	discard	single exon with low confidence or no Blast hit
chr13	37521911	37523203	-	LL0000032989	XLOC_006802	no Blast hit	no Blast hit	1	no	discard	single exon with low confidence or no Blast hit
chr13	39339831	39344156	-	LL0000032990	XLOC_006820	low confidence,XP_021335606.1,LOC101886098,Fc receptor-like protein 5, transcript variant X5	no Blast hit	3	no	keep	more than one exon
chr13	39991843	39996119	-	LL0000032991	XLOC_006824	high confidence,XP_017214605.1,LOC108192163,uncharacterized LOC108192163	low confidence,NP_001158307.1,L1TD1,LINE-1 type transposase domain-containing protein 1	1	no	keep	high/moderate confidence zebrafish BLAST hit
chr13	40239216	40243437	-	LL0000032992	XLOC_006827	moderate confidence,XP_017207808.2,LOC101884524,mucin-1-like	low confidence,NP_002364.5,MAP1A,microtubule-associated protein 1A	1	no	keep	high/moderate confidence zebrafish BLAST hit
chr13	43724505	43724651	-	LL0000032993	XLOC_006864	low confidence,XP_021334747.1,ttn.1,titin, tandem duplicate 1, transcript variant X2	low confidence,NP_001341303.1,TUBGCP5,gamma-tubulin complex component 5 isoform e	1	no	discard	single exon with low confidence or no Blast hit
chr13	44223914	44224425	-	LL0000032994	XLOC_006866	no Blast hit	no Blast hit	1	no	discard	single exon with low confidence or no Blast hit
chr13	44695143	44699052	-	LL0000032995	XLOC_006868	moderate confidence,XP_009289536.1,si:ch211-276i12.9,si:ch211-276i12.9	no Blast hit	1	no	keep	high/moderate confidence zebrafish BLAST hit
chr13	46923790	46924569	-	LL0000032996	XLOC_006899	no Blast hit	low confidence,NP_001350444.1,DHX16,pre-mRNA-splicing factor ATP-dependent RNA helicase DHX16 isoform 3	1	no	discard	single exon with low confidence or no Blast hit
chr13	48203397	48204698	-	LL0000032997	XLOC_006909	no Blast hit	no Blast hit	1	no	discard	single exon with low confidence or no Blast hit
chr13	48564805	48566265	-	LL0000032998	XLOC_006914	no Blast hit	no Blast hit	1	no	discard	single exon with low confidence or no Blast hit
chr13	49000466	49000869	-	LL0000032999	XLOC_006919	low confidence,XP_021336231.1,tnk2b,tyrosine kinase, non-receptor, 2b, transcript variant X5	low confidence,XP_016880187.1,OR3A2,olfactory receptor 3A2 isoform X1	1	no	discard	single exon with low confidence or no Blast hit
chr13	49436452	49439260	-	LL0000033000	XLOC_006925	no Blast hit	low confidence,NP_775751.1,ZNF57,zinc finger protein 57 isoform 1	1	no	discard	single exon with low confidence or no Blast hit
chr13	49590227	49591593	-	LL0000033001	XLOC_006929	no Blast hit	no Blast hit	1	no	discard	single exon with low confidence or no Blast hit
chr13	49591960	49594302	-	LL0000033002	XLOC_006930	low confidence,NP_001121732.1,cdk14,cyclin-dependent kinase 14	no Blast hit	1	no	discard	single exon with low confidence or no Blast hit
chr13	49820915	49824228	-	LL0000033003	XLOC_006933	no Blast hit	no Blast hit	1	no	discard	single exon with low confidence or no Blast hit
chr13	49863533	49864795	-	LL0000033004	XLOC_006935	no Blast hit	no Blast hit	1	no	discard	single exon with low confidence or no Blast hit
chr13	50249020	50249944	-	LL0000033005	XLOC_006941	low confidence,XP_021334165.1,gpr153,G protein-coupled receptor 153, transcript variant X5	no Blast hit	1	no	discard	single exon with low confidence or no Blast hit
chr13	50629759	50630919	-	LL0000033006	XLOC_006950	low confidence,XP_009294029.1,ggt1l2.2,gamma-glutamyltransferase 1 like 2.2	no Blast hit	1	no	discard	single exon with low confidence or no Blast hit
chr13	51134442	51135700	-	LL0000033007	XLOC_006954	no Blast hit	no Blast hit	1	no	discard	single exon with low confidence or no Blast hit
chr13	51496596	51498282	-	LL0000033008	XLOC_006957	no Blast hit	no Blast hit	1	no	discard	single exon with low confidence or no Blast hit
chr13	51585062	51586513	-	LL0000033009	XLOC_006959	low confidence,NP_998431.1,helz,helicase with zinc finger	no Blast hit	1	no	discard	single exon with low confidence or no Blast hit
chr13	51586612	51592745	-	LL0000033010	XLOC_006960	no Blast hit	no Blast hit	1	no	discard	single exon with low confidence or no Blast hit
chr13	51925982	51947090	-	LL0000033011	XLOC_006965	moderate confidence,XP_021336598.1,ptk7b,protein tyrosine kinase 7b	low confidence,NP_690619.1,PTK7,inactive tyrosine-protein kinase 7 isoform b precursor	3	no	keep	high/moderate confidence zebrafish BLAST hit
chr14	105325	106000	+	LL0000033012	XLOC_006988	no Blast hit	no Blast hit	2	no	keep	more than one exon
chr14	106119	107025	+	LL0000033013	XLOC_006989	no Blast hit	no Blast hit	2	no	keep	more than one exon
chr14	1098677	1100497	+	LL0000033014	XLOC_007006	matches or overlaps with known lincRNA	low confidence,XP_016872353.1,GBF1,Golgi-specific brefeldin A-resistance guanine nucleotide exchange factor 1 isoform X12	2	yes	keep	maps to previously identified lincRNA
chr14	1100686	1102805	+	LL0000033015	XLOC_007007	low confidence,XP_009304992.1,LOC101882900,uncharacterized LOC101882900	no Blast hit	2	no	keep	more than one exon
chr14	1327798	1328128	+	LL0000033016	XLOC_007012	low confidence,XP_021333058.1,LOC101883618,uncharacterized protein PF11_0213-like	low confidence,NP_001269222.1,ABCB8,ATP-binding cassette sub-family B member 8, mitochondrial isoform d	1	no	discard	single exon with low confidence or no Blast hit
chr14	1594029	1595238	+	LL0000033017	XLOC_007016	low confidence,NP_001025454.1,ldlra,low density lipoprotein receptor a	low confidence,XP_016870838.1,RALGPS1,ras-specific guanine nucleotide-releasing factor RalGPS1 isoform X17	1	no	discard	single exon with low confidence or no Blast hit
chr14	1868358	1873898	+	LL0000033018	XLOC_007019	high confidence,XP_005174151.2,LOC101882228,protein diaphanous homolog 1-like, transcript variant X2	no Blast hit	2	no	keep	high/moderate confidence zebrafish BLAST hit
chr14	3139875	3141717	+	LL0000033019	XLOC_007029	no Blast hit	no Blast hit	1	no	discard	single exon with low confidence or no Blast hit
chr14	3470976	3473444	+	LL0000033020	XLOC_007032	low confidence,XP_021333737.1,mettl4,methyltransferase like 4, transcript variant X2	no Blast hit	1	no	discard	single exon with low confidence or no Blast hit
chr14	3580120	3581882	+	LL0000033021	XLOC_007038	no Blast hit	no Blast hit	1	no	discard	single exon with low confidence or no Blast hit
chr14	3608833	3610547	+	LL0000033022	XLOC_007039	low confidence,NP_001003597.1,mnd1,meiotic nuclear divisions 1 homolog (S. cerevisiae)	no Blast hit	1	no	discard	single exon with low confidence or no Blast hit
chr14	4822385	4822466	+	LL0000033023	XLOC_007048	low confidence,XP_021327152.1,wu:fc31d10,wu:fc31d10, transcript variant X2	low confidence,NP_073150.2,EBF2,transcription factor COE2	1	no	discard	single exon with low confidence or no Blast hit
chr14	5917187	5924981	+	LL0000033024	XLOC_007057	exact match,XP_009305973.1,LOC103912062,uncharacterized LOC103912062, transcript variant X1	low confidence,NP_976048.1,ZCCHC13,zinc finger CCHC domain-containing protein 13	3	no	discard	identified as duplicate with existing V4.2/RefSeq annotation
chr14	7529476	7532904	+	LL0000033025	XLOC_007078	moderate confidence,XP_021335606.1,LOC101886098,Fc receptor-like protein 5, transcript variant X5	no Blast hit	1	no	keep	high/moderate confidence zebrafish BLAST hit
chr14	8099650	8102038	+	LL0000033026	XLOC_007084	low confidence,NP_001106978.1,il23r,interleukin 23 receptor	no Blast hit	1	no	discard	single exon with low confidence or no Blast hit
chr14	9138128	9138483	+	LL0000033027	XLOC_007100	low confidence,NP_001013363.1,rbm8a,RNA binding motif protein 8A	no Blast hit	1	no	discard	single exon with low confidence or no Blast hit
chr14	9452758	9453936	+	LL0000033028	XLOC_007105	low confidence,XP_021325602.1,myh7bb,myosin, heavy chain 7B, cardiac muscle, beta b, transcript variant X2	no Blast hit	1	no	discard	single exon with low confidence or no Blast hit
chr14	10812935	10813006	+	LL0000033029	XLOC_007116	low confidence,XP_021323772.1,urgcp,upregulator of cell proliferation, transcript variant X1	no Blast hit	1	no	discard	single exon with low confidence or no Blast hit
chr14	10950752	10951575	+	LL0000033030	XLOC_007118	low confidence,NP_001038409.1,jtb,jumping translocation breakpoint	no Blast hit	1	no	discard	single exon with low confidence or no Blast hit
chr14	11484349	11486881	+	LL0000033031	XLOC_007126	high confidence,XP_021323438.1,LOC110438084,uncharacterized LOC110438084	moderate confidence,NP_006020.4,PNMA1,paraneoplastic antigen Ma1	1	no	keep	high/moderate confidence zebrafish BLAST hit
chr14	11594261	11595489	+	LL0000033032	XLOC_007127	high confidence,XP_005159262.1,LOC101884462,putative nuclease HARBI1	high confidence,XP_016873095.1,HARBI1,putative nuclease HARBI1 isoform X2	4	no	keep	high/moderate confidence zebrafish BLAST hit
chr14	11736841	11737259	+	LL0000033033	XLOC_007128	low confidence,XP_021332057.1,zmp:0000000846,zmp:0000000846, transcript variant X1	low confidence,NP_001361710.1,PRKG1,cGMP-dependent protein kinase 1 isoform 3	1	no	discard	single exon with low confidence or no Blast hit
chr14	11740291	11740677	+	LL0000033034	XLOC_007129	low confidence,XP_021330415.1,si:ch211-148f13.1,si:ch211-148f13.1, transcript variant X2	low confidence,XP_016882222.2,HRC,sarcoplasmic reticulum histidine-rich calcium-binding protein isoform X1	1	no	discard	single exon with low confidence or no Blast hit
chr14	12131921	12133354	+	LL0000033035	XLOC_007132	low confidence,XP_021332241.1,LOC110439816,activating signal cointegrator 1 complex subunit 2 homolog	low confidence,XP_016865354.1,MCTP1,multiple C2 and transmembrane domain-containing protein 1 isoform X15	1	no	discard	single exon with low confidence or no Blast hit
chr14	12967700	12970934	+	LL0000033036	XLOC_007138	high confidence,NP_001315129.1,si:dkey-77f5.3,si:dkey-77f5.3	no Blast hit	3	no	keep	high/moderate confidence zebrafish BLAST hit
chr14	13226356	13227694	+	LL0000033037	XLOC_007139	high confidence,XP_009291512.1,LOC103909069,lysine-specific demethylase 5B-B-like	low confidence,XP_005247748.1,SENP2,sentrin-specific protease 2 isoform X2	4	no	keep	high/moderate confidence zebrafish BLAST hit
chr14	13385385	13386895	+	LL0000033038	XLOC_007141	high confidence,XP_021325913.1,LOC110438340,uncharacterized LOC110438340	no Blast hit	1	no	keep	high/moderate confidence zebrafish BLAST hit
chr14	13921376	13924938	+	LL0000033039	XLOC_007145	low confidence,XP_001344635.2,LOC100005637,uncharacterized LOC100005637	no Blast hit	5	no	keep	more than one exon
chr14	13958467	14000876	+	LL0000033040	XLOC_007146	low confidence,NP_955913.1,csrnp1b,cysteine-serine-rich nuclear protein 1b	low confidence,XP_011521918.1,MYBBP1A,myb-binding protein 1A isoform X2	4	no	keep	more than one exon
chr14	14104792	14108816	+	LL0000033041	XLOC_007147	high confidence,XP_021323077.1,cuzd1.1,CUB and zona pellucida-like domains 1, tandem duplicate 1	moderate confidence,NP_001128360.1,RTL1,retrotransposon-like protein 1	1	no	keep	high/moderate confidence zebrafish BLAST hit
chr14	14142970	14147416	+	LL0000033042	XLOC_007148	low confidence,NP_001139173.1,si:ch211-168h21.3,si:ch211-168h21.3	low confidence,XP_016856297.1,ZCCHC11,terminal uridylyltransferase 4 isoform X15	1	no	discard	single exon with low confidence or no Blast hit
chr14	15634701	15637830	+	LL0000033043	XLOC_007169	high confidence,XP_021331039.1,LOC110439392,uncharacterized LOC110439392	no Blast hit	1	no	keep	high/moderate confidence zebrafish BLAST hit
chr14	16226344	16229839	+	LL0000033044	XLOC_007178	low confidence,XP_021331061.1,LOC110439405,uncharacterized LOC110439405	no Blast hit	1	no	discard	single exon with low confidence or no Blast hit
chr14	16252830	16256611	+	LL0000033045	XLOC_007179	low confidence,XP_021330197.1,LOC110438318,uncharacterized LOC110438318	no Blast hit	1	no	discard	single exon with low confidence or no Blast hit
chr14	16261282	16261855	+	LL0000033046	XLOC_007180	no Blast hit	no Blast hit	1	no	discard	single exon with low confidence or no Blast hit
chr14	17938830	17939630	+	LL0000033047	XLOC_007192	no Blast hit	no Blast hit	1	no	discard	single exon with low confidence or no Blast hit
chr14	18194850	18201526	+	LL0000033048	XLOC_007193	high confidence,XP_021332670.1,LOC110439859,uncharacterized LOC110439859	moderate confidence,XP_016865088.1,GIN1,gypsy retrotransposon integrase-like protein 1 isoform X1	1	no	keep	high/moderate confidence zebrafish BLAST hit
chr14	18307461	18309425	+	LL0000033049	XLOC_007195	low confidence,XP_021325075.1,znf1157,zinc finger protein 1157, transcript variant X4	no Blast hit	4	no	keep	more than one exon
chr14	18796795	18797848	+	LL0000033050	XLOC_007197	no Blast hit	no Blast hit	1	no	discard	single exon with low confidence or no Blast hit
chr14	18992243	19001724	+	LL0000033051	XLOC_007199	high confidence,XP_021328439.1,LOC101886835,uncharacterized LOC101886835, transcript variant X1	no Blast hit	4	no	keep	high/moderate confidence zebrafish BLAST hit
chr14	19270461	19272505	+	LL0000033052	XLOC_007201	low confidence,XP_021327787.1,LOC103910200,sterile alpha motif domain-containing protein 9-like	no Blast hit	1	no	discard	single exon with low confidence or no Blast hit
chr14	21029229	21036612	+	LL0000033053	XLOC_007209	low confidence,XP_021329064.1,LOC562049,formin-binding protein 1-like, transcript variant X23	low confidence,NP_001035251.1,METTL26,methyltransferase-like 26 isoform c	5	no	keep	more than one exon
chr14	21962197	21965598	+	LL0000033054	XLOC_007224	high confidence,XP_017207298.1,LOC108179762,uncharacterized LOC108179762	low confidence,NP_001128360.1,RTL1,retrotransposon-like protein 1	1	no	keep	high/moderate confidence zebrafish BLAST hit
chr14	21967207	21968416	+	LL0000033055	XLOC_007225	high confidence,XP_021327306.1,LOC101886116,uncharacterized LOC101886116, transcript variant X6	low confidence,XP_024309461.1,EEFSEC,selenocysteine-specific elongation factor isoform X2	1	no	keep	high/moderate confidence zebrafish BLAST hit
chr14	22526377	22527798	+	LL0000033056	XLOC_007238	high confidence,XP_009289536.1,si:ch211-276i12.9,si:ch211-276i12.9	no Blast hit	1	no	keep	high/moderate confidence zebrafish BLAST hit
chr14	22527954	22529325	+	LL0000033057	XLOC_007239	low confidence,XP_009296169.1,zgc:77158,zgc:77158, transcript variant X1	no Blast hit	1	no	discard	single exon with low confidence or no Blast hit
chr14	22816201	22820077	+	LL0000033058	XLOC_007242	high confidence,NP_001153300.1,slc4a11,solute carrier family 4, sodium borate transporter, member 11	high confidence,XP_005260913.1,SLC4A11,sodium bicarbonate transporter-like protein 11 isoform X1	4	no	keep	high/moderate confidence zebrafish BLAST hit
chr14	22871863	22873797	+	LL0000033059	XLOC_007244	no Blast hit	no Blast hit	1	no	discard	single exon with low confidence or no Blast hit
chr14	22975725	22978449	+	LL0000033060	XLOC_007245	low confidence,NP_001025454.1,ldlra,low density lipoprotein receptor a	no Blast hit	2	no	keep	more than one exon
chr14	23070931	23073374	+	LL0000033061	XLOC_007246	high confidence,XP_021325913.1,LOC110438340,uncharacterized LOC110438340	low confidence,XP_016878275.1,LOC107984745,uncharacterized protein LOC107984745	1	no	keep	high/moderate confidence zebrafish BLAST hit
chr14	23500548	23501435	+	LL0000033062	XLOC_007248	low confidence,NP_001028904.1,,	low confidence,XP_016856459.1,ZZZ3,ZZ-type zinc finger-containing protein 3 isoform X2	1	no	discard	single exon with low confidence or no Blast hit
chr14	24113604	24115320	+	LL0000033063	XLOC_007260	no Blast hit	no Blast hit	1	no	discard	single exon with low confidence or no Blast hit
chr14	24472953	24473784	+	LL0000033064	XLOC_007267	no Blast hit	no Blast hit	1	no	discard	single exon with low confidence or no Blast hit
chr14	25512525	25513263	+	LL0000033065	XLOC_007275	no Blast hit	low confidence,XP_005273515.1,KIF13B,kinesin-like protein KIF13B isoform X3	2	no	keep	more than one exon
chr14	25528114	25528689	+	LL0000033066	XLOC_007276	low confidence,NP_001129959.1,zswim6,zinc finger, SWIM-type containing 6	low confidence,XP_016864726.1,RHOBTB3,rho-related BTB domain-containing protein 3 isoform X2	1	no	discard	single exon with low confidence or no Blast hit
chr14	29012457	29033370	+	LL0000033067	XLOC_007299	high confidence,XP_021332670.1,LOC110439859,uncharacterized LOC110439859	high confidence,XP_016865088.1,GIN1,gypsy retrotransposon integrase-like protein 1 isoform X1	3	no	keep	high/moderate confidence zebrafish BLAST hit
chr14	29022218	29024024	+	LL0000033068	XLOC_007300	high confidence,XP_021323971.1,LOC103909212,zinc finger CCHC domain-containing protein 12-like	moderate confidence,NP_071434.2,MOAP1,modulator of apoptosis 1	1	no	keep	high/moderate confidence zebrafish BLAST hit
chr14	30810349	30811266	+	LL0000033069	XLOC_007320	no Blast hit	no Blast hit	1	no	discard	single exon with low confidence or no Blast hit
chr14	34354916	34355856	+	LL0000033070	XLOC_007364	moderate confidence,XP_017214141.2,LOC101884685,golgin subfamily A member 6-like protein 22	no Blast hit	2	no	keep	high/moderate confidence zebrafish BLAST hit
chr14	38178930	38179010	+	LL0000033071	XLOC_007397	no Blast hit	no Blast hit	1	no	discard	single exon with low confidence or no Blast hit
chr14	41845997	41863151	+	LL0000033072	XLOC_007423	moderate confidence,NP_001106978.1,il23r,interleukin 23 receptor	no Blast hit	2	no	keep	high/moderate confidence zebrafish BLAST hit
chr14	45022051	45023818	+	LL0000033073	XLOC_007435	no Blast hit	no Blast hit	1	no	discard	single exon with low confidence or no Blast hit
chr14	45025760	45027851	+	LL0000033074	XLOC_007436	no Blast hit	no Blast hit	1	no	discard	single exon with low confidence or no Blast hit
chr14	45248178	45252115	+	LL0000033075	XLOC_007439	low confidence,NP_001106978.1,il23r,interleukin 23 receptor	low confidence,NP_001005226.1,OR2B3,putative olfactory receptor 2B3	1	no	discard	single exon with low confidence or no Blast hit
chr14	45252458	45253411	+	LL0000033076	XLOC_007440	low confidence,XP_021335606.1,LOC101886098,Fc receptor-like protein 5, transcript variant X5	no Blast hit	1	no	discard	single exon with low confidence or no Blast hit
chr14	46862296	46865923	+	LL0000033077	XLOC_007466	low confidence,NP_001076334.1,si:ch211-262h13.3,si:ch211-262h13.3	low confidence,XP_016867853.1,RNF216,E3 ubiquitin-protein ligase RNF216 isoform X3	6	no	keep	more than one exon
chr14	47633541	47634245	+	LL0000033078	XLOC_007469	low confidence,XP_005167483.1,gpr156,G protein-coupled receptor 156	no Blast hit	1	no	discard	single exon with low confidence or no Blast hit
chr14	49362882	49364153	+	LL0000033079	XLOC_007487	no Blast hit	no Blast hit	1	no	discard	single exon with low confidence or no Blast hit
chr14	49366018	49368732	+	LL0000033080	XLOC_007488	high confidence,NP_001106978.1,il23r,interleukin 23 receptor	no Blast hit	3	no	keep	high/moderate confidence zebrafish BLAST hit
chr14	49370311	49373332	+	LL0000033081	XLOC_007489	low confidence,XP_009292205.2,LOC100329768,G-protein coupled receptor 20-like	no Blast hit	1	no	discard	single exon with low confidence or no Blast hit
chr14	49672643	49675315	+	LL0000033082	XLOC_007494	low confidence,NP_001106978.1,il23r,interleukin 23 receptor	no Blast hit	1	no	discard	single exon with low confidence or no Blast hit
chr14	49675621	49676802	+	LL0000033083	XLOC_007495	low confidence,NP_001019632.2,polr2b,polymerase (RNA) II (DNA directed) polypeptide B	low confidence,NP_000929.1,POLR2B,DNA-directed RNA polymerase II subunit RPB2 isoform 1	1	no	discard	single exon with low confidence or no Blast hit
chr14	50983652	50986401	+	LL0000033084	XLOC_007504	low confidence,XP_021329466.1,gb:co360592,expressed sequence CO360592, transcript variant X2	no Blast hit	2	no	keep	more than one exon
chr14	52222400	52222973	+	LL0000033085	XLOC_007508	low confidence,XP_002661342.3,tecpr1b,tectonin beta-propeller repeat containing 1b, transcript variant X1	low confidence,NP_000341.2,ABCA4,retinal-specific phospholipid-transporting ATPase ABCA4	1	no	discard	single exon with low confidence or no Blast hit
chr14	52230507	52245396	+	LL0000033086	XLOC_007509	low confidence,XP_021336003.1,prkcea,protein kinase C, epsilon a, transcript variant X4	high confidence,NP_001338.2,DGKQ,diacylglycerol kinase theta	2	no	keep	high confidence BLAST hit to human protein
chr14	52603691	52607631	+	LL0000033087	XLOC_007518	low confidence,XP_021336949.1,pcgf3,polycomb group ring finger 3	low confidence,NP_001304765.1,PCGF3,polycomb group RING finger protein 3	2	no	keep	more than one exon
chr14	52607951	52609459	+	LL0000033088	XLOC_007520	high confidence,XP_021327923.1,LOC101885714,uncharacterized LOC101885714	moderate confidence,NP_114429.2,CCDC8,coiled-coil domain-containing protein 8	1	no	keep	high/moderate confidence zebrafish BLAST hit
chr14	52609581	52610648	+	LL0000033089	XLOC_007521	low confidence,NP_957170.1,dhx38,DEAH (Asp-Glu-Ala-His) box polypeptide 38	no Blast hit	1	no	discard	single exon with low confidence or no Blast hit
chr14	52615962	52616708	+	LL0000033090	XLOC_007522	low confidence,XP_009301795.1,unm_hu7910,un-named hu7910, transcript variant X1	no Blast hit	1	no	discard	single exon with low confidence or no Blast hit
chr14	52650413	52650710	+	LL0000033091	XLOC_007524	moderate confidence,NP_001018423.1,slc49a3,solute carrier family 49 member A3	low confidence,NP_001305146.1,TMEM208,transmembrane protein 208 isoform 2	1	no	keep	high/moderate confidence zebrafish BLAST hit
chr14	52654566	52655212	+	LL0000033092	XLOC_007525	no Blast hit	no Blast hit	1	no	discard	single exon with low confidence or no Blast hit
chr14	130083	130334	-	LL0000033093	XLOC_007529	low confidence,XP_005172796.1,phldb2a,pleckstrin homology-like domain, family B, member 2a, transcript variant X4	low confidence,NP_001005163.1,OR52D1,olfactory receptor 52D1	1	no	discard	single exon with low confidence or no Blast hit
chr14	152880	153777	-	LL0000033094	XLOC_007530	no Blast hit	no Blast hit	2	no	keep	more than one exon
chr14	251686	252137	-	LL0000033095	XLOC_007536	no Blast hit	no Blast hit	1	no	discard	single exon with low confidence or no Blast hit
chr14	347980	348066	-	LL0000033096	XLOC_007537	low confidence,XP_001336747.1,ccdc80l2,coiled-coil domain containing 80 like 2	no Blast hit	1	no	discard	single exon with low confidence or no Blast hit
chr14	506761	511292	-	LL0000033097	XLOC_007541	low confidence,NP_001070056.2,spata5l1,spermatogenesis associated 5-like 1	moderate confidence,NP_001332785.1,SPATA5,ATPase family protein 2 homolog isoform 3	4	no	keep	moderate confidence BLAST hit to human protein
chr14	643669	646963	-	LL0000033098	XLOC_007545	low confidence,XP_021332294.1,LOC110439826,uncharacterized LOC110439826	no Blast hit	10	no	discard	identified as duplicate with existing V4.2/RefSeq annotation
chr14	681393	681866	-	LL0000033099	XLOC_007547	no Blast hit	no Blast hit	1	no	discard	single exon with low confidence or no Blast hit
chr14	1054367	1062233	-	LL0000033100	XLOC_007556	no Blast hit	no Blast hit	7	no	keep	more than one exon
chr14	1232117	1232520	-	LL0000033101	XLOC_007561	low confidence,NP_001073535.1,g6pc3,glucose 6 phosphatase, catalytic, 3	low confidence,NP_001357393.1,MRGPRX3,mas-related G-protein coupled receptor member X3	1	no	discard	single exon with low confidence or no Blast hit
chr14	2104483	2105864	-	LL0000033102	XLOC_007573	high confidence,NP_001019346.1,pcdh2g2,protocadherin 2 gamma 2	high confidence,NP_061758.1,PCDHB15,protocadherin beta-15 precursor	1	no	keep	high/moderate confidence zebrafish BLAST hit
chr14	4599078	4600349	-	LL0000033103	XLOC_007605	low confidence,XP_021334217.1,bicdl1,BICD family like cargo adaptor 1	no Blast hit	1	no	discard	single exon with low confidence or no Blast hit
chr14	4604391	4605916	-	LL0000033104	XLOC_007606	low confidence,XP_002667105.2,LOC100331460,beta-1,3-galactosyltransferase 2-like	no Blast hit	1	no	discard	single exon with low confidence or no Blast hit
chr14	4606023	4607723	-	LL0000033105	XLOC_007607	no Blast hit	no Blast hit	1	no	discard	single exon with low confidence or no Blast hit
chr14	7579948	7580826	-	LL0000033106	XLOC_007636	no Blast hit	no Blast hit	1	no	discard	single exon with low confidence or no Blast hit
chr14	9552164	9553229	-	LL0000033107	XLOC_007659	low confidence,NP_001096039.1,radil,Ras association and DIL domains	no Blast hit	1	no	discard	single exon with low confidence or no Blast hit
chr14	9553463	9554808	-	LL0000033108	XLOC_007660	low confidence,NP_001106978.1,il23r,interleukin 23 receptor	low confidence,XP_024308117.1,EMD,emerin isoform X1	1	no	discard	single exon with low confidence or no Blast hit
chr14	9554892	9555959	-	LL0000033109	XLOC_007661	low confidence,XP_021332296.1,rasa1a,RAS p21 protein activator (GTPase activating protein) 1a, transcript variant X2	no Blast hit	1	no	discard	single exon with low confidence or no Blast hit
chr14	9557407	9559229	-	LL0000033110	XLOC_007662	moderate confidence,XP_021333807.1,lrfn4b,leucine rich repeat and fibronectin type III domain containing 4b, transcript variant X2	moderate confidence,NP_055883.2,PEG10,retrotransposon-derived protein PEG10 isoform 1	1	no	keep	high/moderate confidence zebrafish BLAST hit
chr14	9559327	9562524	-	LL0000033111	XLOC_007663	high confidence,XP_021334226.1,LOC110440028,nephrocystin-4-like	high confidence,NP_001035242.1,PEG10,retrotransposon-derived protein PEG10 isoform 2	1	no	keep	high/moderate confidence zebrafish BLAST hit
chr14	9568983	9570974	-	LL0000033112	XLOC_007664	no Blast hit	low confidence,NP_653283.3,SLFN13,schlafen family member 13	3	no	keep	more than one exon
chr14	9571673	9581478	-	LL0000033113	XLOC_007665	matches or overlaps with known lincRNA	no Blast hit	9	yes	keep	maps to previously identified lincRNA
chr14	10780037	10782023	-	LL0000033114	XLOC_007676	high confidence,XP_021323971.1,LOC103909212,zinc finger CCHC domain-containing protein 12-like	moderate confidence,XP_011529314.1,ZCCHC18,zinc finger CCHC domain-containing protein 18 isoform X1	1	no	keep	high/moderate confidence zebrafish BLAST hit
chr14	12864138	12885061	-	LL0000033115	XLOC_007704	high confidence,NP_001129460.1,zgc:194221,zgc:194221	low confidence,XP_005256613.1,FLII,protein flightless-1 homolog isoform X2	3	no	keep	high/moderate confidence zebrafish BLAST hit
chr14	13261642	13303744	-	LL0000033116	XLOC_007706	low confidence,XP_009296319.1,si:dkey-217l24.1,si:dkey-217l24.1, transcript variant X2	low confidence,NP_001092759.1,SH3RF3,E3 ubiquitin-protein ligase SH3RF3 precursor	3	no	keep	more than one exon
chr14	13290824	13298992	-	LL0000033117	XLOC_007707	high confidence,XP_021323083.1,LOC110438040,uncharacterized LOC110438040	no Blast hit	3	no	keep	high/moderate confidence zebrafish BLAST hit
chr14	13337716	13337971	-	LL0000033118	XLOC_007708	low confidence,NP_001230252.1,selp,selectin P	low confidence,NP_001337767.1,ICA1,islet cell autoantigen 1 isoform i	1	no	discard	single exon with low confidence or no Blast hit
chr14	13593914	13630579	-	LL0000033119	XLOC_007709	low confidence,XP_017211497.1,mink1,misshapen-like kinase 1, transcript variant X7	no Blast hit	2	no	keep	more than one exon
chr14	13603330	13604110	-	LL0000033120	XLOC_007710	low confidence,XP_001922446.3,LOC568792,A disintegrin and metalloproteinase with thrombospondin motifs 16	low confidence,NP_001352834.1,MAGI1,membrane-associated guanylate kinase, WW and PDZ domain-containing protein 1 isoform f	1	no	discard	single exon with low confidence or no Blast hit
chr14	13616171	13660424	-	LL0000033121	XLOC_007711	high confidence,XP_021322747.1,LOC101885645,uncharacterized LOC101885645	no Blast hit	2	no	keep	high/moderate confidence zebrafish BLAST hit
chr14	13617453	13617938	-	LL0000033122	XLOC_007712	no Blast hit	no Blast hit	1	no	discard	single exon with low confidence or no Blast hit
chr14	13619480	13620161	-	LL0000033123	XLOC_007713	low confidence,XP_021322552.1,LOC110437976,uncharacterized LOC110437976, transcript variant X1	no Blast hit	1	no	discard	single exon with low confidence or no Blast hit
chr14	13654622	13655700	-	LL0000033124	XLOC_007714	low confidence,XP_688983.3,xdh,xanthine dehydrogenase	low confidence,XP_024304915.1,CAPRIN2,caprin-2 isoform X37	1	no	discard	single exon with low confidence or no Blast hit
chr14	13716281	13726824	-	LL0000033125	XLOC_007715	high confidence,XP_021330197.1,LOC110438318,uncharacterized LOC110438318	no Blast hit	2	no	keep	high/moderate confidence zebrafish BLAST hit
chr14	13726969	13728331	-	LL0000033126	XLOC_007717	low confidence,NP_001295486.1,p2ry12,purinergic receptor P2Y, G-protein coupled, 12	no Blast hit	1	no	discard	single exon with low confidence or no Blast hit
chr14	14970306	14971172	-	LL0000033127	XLOC_007727	low confidence,XP_021331883.1,kank1b,KN motif and ankyrin repeat domains 1b, transcript variant X2	low confidence,NP_005107.4,SLC23A2,solute carrier family 23 member 2	1	no	discard	single exon with low confidence or no Blast hit
chr14	14972229	14973804	-	LL0000033128	XLOC_007728	low confidence,XP_005159991.1,LOC101886777,predicted GPI-anchored protein 23	no Blast hit	1	no	discard	single exon with low confidence or no Blast hit
chr14	15016553	15021099	-	LL0000033129	XLOC_007729	no Blast hit	no Blast hit	1	no	discard	single exon with low confidence or no Blast hit
chr14	15021863	15024062	-	LL0000033130	XLOC_007730	low confidence,XP_021328859.1,grid1a,glutamate receptor, ionotropic, delta 1a, transcript variant X4	low confidence,NP_001356493.1,RGS8,regulator of G-protein signaling 8 isoform 2	1	no	discard	single exon with low confidence or no Blast hit
chr14	17102345	17105429	-	LL0000033131	XLOC_007753	no Blast hit	no Blast hit	1	no	discard	single exon with low confidence or no Blast hit
chr14	18228595	18229258	-	LL0000033132	XLOC_007761	low confidence,XP_009302035.1,mbd1a,methyl-CpG binding domain protein 1a, transcript variant X2	no Blast hit	1	no	discard	single exon with low confidence or no Blast hit
chr14	18790178	18791354	-	LL0000033133	XLOC_007764	moderate confidence,XP_009289536.1,si:ch211-276i12.9,si:ch211-276i12.9	low confidence,NP_005205.2,CTLA4,cytotoxic T-lymphocyte protein 4 isoform CTLA4-TM precursor	1	no	keep	high/moderate confidence zebrafish BLAST hit
chr14	18796975	18798383	-	LL0000033134	XLOC_007765	no Blast hit	no Blast hit	1	no	discard	single exon with low confidence or no Blast hit
chr14	19172122	19173679	-	LL0000033135	XLOC_007767	low confidence,XP_021325140.1,LOC108181106,stonustoxin subunit beta-like	no Blast hit	1	no	discard	single exon with low confidence or no Blast hit
chr14	19229268	19230708	-	LL0000033136	XLOC_007768	moderate confidence,NP_001025454.1,ldlra,low density lipoprotein receptor a	no Blast hit	1	no	keep	high/moderate confidence zebrafish BLAST hit
chr14	19610108	19612079	-	LL0000033137	XLOC_007771	low confidence,XP_017206832.1,LOC103909784,uncharacterized LOC103909784, transcript variant X2	low confidence,XP_016867287.1,PKD1L1,polycystic kidney disease protein 1-like 1 isoform X1	3	no	keep	more than one exon
chr14	19709362	19710859	-	LL0000033138	XLOC_007772	low confidence,XP_017213470.1,glis3,GLIS family zinc finger 3, transcript variant X1	no Blast hit	1	no	discard	single exon with low confidence or no Blast hit
chr14	20050591	20052752	-	LL0000033139	XLOC_007775	low confidence,NP_001071220.1,zgc:123035,zgc:123035, transcript variant 2	no Blast hit	1	no	discard	single exon with low confidence or no Blast hit
chr14	20053598	20054727	-	LL0000033140	XLOC_007776	low confidence,XP_001341795.5,si:dkey-202l22.6,si:dkey-202l22.6, transcript variant X2	low confidence,XP_011524207.1,RTTN,rotatin isoform X10	1	no	discard	single exon with low confidence or no Blast hit
chr14	21199523	21201602	-	LL0000033141	XLOC_007783	no Blast hit	no Blast hit	1	no	discard	single exon with low confidence or no Blast hit
chr14	23515971	23517408	-	LL0000033142	XLOC_007800	no Blast hit	low confidence,NP_001186311.1,RNF145,RING finger protein 145 isoform 4	1	no	discard	single exon with low confidence or no Blast hit
chr14	28912137	28916762	-	LL0000033143	XLOC_007853	low confidence,XP_021329186.1,LOC110439107,uncharacterized LOC110439107	no Blast hit	6	no	keep	more than one exon
chr14	31159551	31161112	-	LL0000033144	XLOC_007885	no Blast hit	low confidence,NP_001181930.1,PTPRU,receptor-type tyrosine-protein phosphatase U isoform 4 precursor	1	no	discard	single exon with low confidence or no Blast hit
chr14	31171079	31172716	-	LL0000033145	XLOC_007886	no Blast hit	low confidence,XP_006710764.1,SPATA6,spermatogenesis-associated protein 6 isoform X10	1	no	discard	single exon with low confidence or no Blast hit
chr14	31564878	31566368	-	LL0000033146	XLOC_007896	low confidence,NP_956619.1,zgc:56409,zgc:56409	low confidence,NP_775922.3,FSIP2,fibrous sheath-interacting protein 2	1	no	discard	single exon with low confidence or no Blast hit
chr14	31901028	31902503	-	LL0000033147	XLOC_007906	moderate confidence,NP_001129452.1,zgc:194285,zgc:194285	no Blast hit	1	no	keep	high/moderate confidence zebrafish BLAST hit
chr14	34408511	34410373	-	LL0000033148	XLOC_007954	no Blast hit	no Blast hit	1	no	discard	single exon with low confidence or no Blast hit
chr14	34462491	34464825	-	LL0000033149	XLOC_007955	low confidence,XP_017209149.1,si:ch211-149b19.4,si:ch211-149b19.4, transcript variant X2	no Blast hit	1	no	discard	single exon with low confidence or no Blast hit
chr14	36894855	36896069	-	LL0000033150	XLOC_007977	high confidence,NP_001106978.1,il23r,interleukin 23 receptor	low confidence,XP_011514446.1,WDR86,WD repeat-containing protein 86 isoform X1	1	no	keep	high/moderate confidence zebrafish BLAST hit
chr14	38758191	38760187	-	LL0000033151	XLOC_007981	low confidence,NP_001004549.1,nt5c2l1,5'-nucleotidase, cytosolic II, like 1	no Blast hit	1	no	discard	single exon with low confidence or no Blast hit
chr14	40906513	40911725	-	LL0000033152	XLOC_008001	low confidence,XP_021322913.1,zgc:194275,zgc:194275, transcript variant X2	no Blast hit	1	no	discard	single exon with low confidence or no Blast hit
chr14	41398377	41398449	-	LL0000033153	XLOC_008007	low confidence,NP_001029092.1,ahrrb,aryl-hydrocarbon receptor repressor b	low confidence,NP_001354490.1,DOCK7,dedicator of cytokinesis protein 7 isoform 7	1	no	discard	single exon with low confidence or no Blast hit
chr14	41855095	41860760	-	LL0000033154	XLOC_008016	low confidence,XP_017210666.2,LOC101884638,sterile alpha motif domain-containing protein 3-like	no Blast hit	4	no	keep	more than one exon
chr14	42934702	42937081	-	LL0000033155	XLOC_008020	low confidence,NP_001025399.1,zgc:113220,zgc:113220	no Blast hit	1	no	discard	single exon with low confidence or no Blast hit
chr14	43783297	43785074	-	LL0000033156	XLOC_008029	high confidence,XP_005166307.1,LOC101886784,uncharacterized LOC101886784	no Blast hit	1	no	keep	high/moderate confidence zebrafish BLAST hit
chr14	43785949	43787458	-	LL0000033157	XLOC_008030	high confidence,XP_005172371.1,LOC101882837,uncharacterized LOC101882837	no Blast hit	1	no	keep	high/moderate confidence zebrafish BLAST hit
chr14	47535467	47535891	-	LL0000033158	XLOC_008071	no Blast hit	no Blast hit	1	no	discard	single exon with low confidence or no Blast hit
chr14	48559421	48561226	-	LL0000033159	XLOC_008078	no Blast hit	no Blast hit	1	no	discard	single exon with low confidence or no Blast hit
chr14	48570670	48572473	-	LL0000033160	XLOC_008079	low confidence,XP_017207555.1,LOC108179993,zinc finger BED domain-containing protein 1-like	no Blast hit	1	no	discard	single exon with low confidence or no Blast hit
chr14	48726907	48728433	-	LL0000033161	XLOC_008082	low confidence,NP_001002572.1,srprb,signal recognition particle receptor, B subunit	low confidence,NP_001356560.1,LYRM1,LYR motif-containing protein 1 isoform 2	1	no	discard	single exon with low confidence or no Blast hit
chr14	48729828	48731843	-	LL0000033162	XLOC_008083	low confidence,NP_001106978.1,il23r,interleukin 23 receptor	low confidence,NP_001128523.1,FAM160B1,protein FAM160B1 isoform b	1	no	discard	single exon with low confidence or no Blast hit
chr14	48804397	48811896	-	LL0000033163	XLOC_008086	exact match,XP_005157388.1,LOC101883804,uncharacterized LOC101883804, transcript variant X1	low confidence,XP_016865088.1,GIN1,gypsy retrotransposon integrase-like protein 1 isoform X1	3	no	keep	exact match BLAST hit with zebrafish protein
chr14	49068868	49073826	-	LL0000033164	XLOC_008091	no Blast hit	no Blast hit	2	no	keep	more than one exon
chr14	49113994	49114366	-	LL0000033165	XLOC_008092	low confidence,XP_021323354.1,ces2,carboxylesterase 2 (intestine, liver), transcript variant X1	low confidence,NP_002025.2,FUT5,alpha-(1,3)-fucosyltransferase 5	1	no	discard	single exon with low confidence or no Blast hit
chr14	50694092	50696118	-	LL0000033166	XLOC_008101	high confidence,NP_001007211.1,si:busm1-105l16.2,si:busm1-105l16.2, transcript variant 1	no Blast hit	4	no	keep	high/moderate confidence zebrafish BLAST hit
chr14	51150864	51157696	-	LL0000033167	XLOC_008106	low confidence,XP_021326442.1,LOC101887189,uncharacterized LOC101887189	low confidence,NP_001264044.1,DNAH11,dynein heavy chain 11, axonemal	1	no	discard	single exon with low confidence or no Blast hit
chr14	51158473	51159945	-	LL0000033168	XLOC_008107	no Blast hit	low confidence,NP_671710.1,KCNIP4,Kv channel-interacting protein 4 isoform 2	1	no	discard	single exon with low confidence or no Blast hit
chr14	51742181	51743054	-	LL0000033169	XLOC_008110	no Blast hit	no Blast hit	2	no	keep	more than one exon
chr14	52657244	52658303	-	LL0000033170	XLOC_008119	low confidence,XP_021329606.1,LOC110439146,proline-rich protein 2-like	low confidence,NP_115642.3,C2orf16,uncharacterized protein C2orf16	3	no	keep	more than one exon
chr15	38370	38464	+	LL0000033171	XLOC_008130	no Blast hit	no Blast hit	1	no	discard	single exon with low confidence or no Blast hit
chr15	262415	264933	+	LL0000033172	XLOC_008133	low confidence,NP_001106978.1,il23r,interleukin 23 receptor	no Blast hit	1	no	discard	single exon with low confidence or no Blast hit
chr15	1012790	1013573	+	LL0000033173	XLOC_008149	low confidence,XP_692173.5,adcy2a,adenylate cyclase 2a, transcript variant X1	no Blast hit	1	no	discard	single exon with low confidence or no Blast hit
chr15	1217400	1218466	+	LL0000033174	XLOC_008163	low confidence,XP_021322082.1,LOC100148655,polymeric immunoglobulin receptor-like	low confidence,NP_001096654.1,FMN1,formin-1 isoform b	1	no	discard	single exon with low confidence or no Blast hit
chr15	2544950	2547672	+	LL0000033175	XLOC_008184	low confidence,NP_001106978.1,il23r,interleukin 23 receptor	no Blast hit	2	no	keep	more than one exon
chr15	2548250	2550756	+	LL0000033176	XLOC_008185	moderate confidence,XP_021335606.1,LOC101886098,Fc receptor-like protein 5, transcript variant X5	no Blast hit	1	no	keep	high/moderate confidence zebrafish BLAST hit
chr15	2687775	2689377	+	LL0000033177	XLOC_008189	no Blast hit	low confidence,NP_001135753.1,ARCN1,coatomer subunit delta isoform 2	1	no	discard	single exon with low confidence or no Blast hit
chr15	4333389	4335484	+	LL0000033178	XLOC_008202	moderate confidence,XP_009289536.1,si:ch211-276i12.9,si:ch211-276i12.9	no Blast hit	1	no	keep	high/moderate confidence zebrafish BLAST hit
chr15	5230722	5232419	+	LL0000033179	XLOC_008210	low confidence,XP_017206832.1,LOC103909784,uncharacterized LOC103909784, transcript variant X2	low confidence,NP_653267.2,DNHD1,dynein heavy chain domain-containing protein 1 isoform 1	1	no	discard	single exon with low confidence or no Blast hit
chr15	5351351	5352781	+	LL0000033180	XLOC_008220	exact match,NP_001122054.1,or114-1,odorant receptor, family A, subfamily 114, member 1	high confidence,NP_001005165.1,OR52E4,olfactory receptor 52E4	2	no	discard	identified as duplicate with existing V4.2/RefSeq annotation
chr15	6034812	6036612	+	LL0000033181	XLOC_008227	low confidence,XP_005169589.1,btaf1,BTAF1 RNA polymerase II, B-TFIID transcription factor-associated	no Blast hit	1	no	discard	single exon with low confidence or no Blast hit
chr15	6729700	6737571	+	LL0000033182	XLOC_008233	moderate confidence,XP_005172806.1,dusp26,dual specificity phosphatase 26, transcript variant X2	no Blast hit	1	no	keep	high/moderate confidence zebrafish BLAST hit
chr15	6737719	6739172	+	LL0000033183	XLOC_008234	no Blast hit	no Blast hit	1	no	discard	single exon with low confidence or no Blast hit
chr15	7367598	7368544	+	LL0000033184	XLOC_008242	low confidence,NP_001071220.1,zgc:123035,zgc:123035, transcript variant 2	no Blast hit	1	no	discard	single exon with low confidence or no Blast hit
chr15	9640602	9648275	+	LL0000033185	XLOC_008262	exact match,XP_021321993.1,LOC103908802,uncharacterized LOC103908802, transcript variant X2	no Blast hit	3	no	keep	exact match BLAST hit with zebrafish protein
chr15	10703530	10704341	+	LL0000033186	XLOC_008269	low confidence,NP_001076334.1,si:ch211-262h13.3,si:ch211-262h13.3	no Blast hit	2	no	keep	more than one exon
chr15	11402614	11404027	+	LL0000033187	XLOC_008275	low confidence,XP_001341795.5,si:dkey-202l22.6,si:dkey-202l22.6, transcript variant X2	no Blast hit	1	no	discard	single exon with low confidence or no Blast hit
chr15	11404218	11407596	+	LL0000033188	XLOC_008276	low confidence,XP_021331061.1,LOC110439405,uncharacterized LOC110439405	no Blast hit	1	no	discard	single exon with low confidence or no Blast hit
chr15	12818068	12819047	+	LL0000033189	XLOC_008290	low confidence,XP_009296319.1,si:dkey-217l24.1,si:dkey-217l24.1, transcript variant X2	low confidence,NP_001092759.1,SH3RF3,E3 ubiquitin-protein ligase SH3RF3 precursor	1	no	discard	single exon with low confidence or no Blast hit
chr15	12921764	12923843	+	LL0000033190	XLOC_008292	low confidence,XP_021334698.1,LOC101882148,uncharacterized LOC101882148, transcript variant X5	no Blast hit	5	no	discard	identified as duplicate with existing V4.2/RefSeq annotation
chr15	13325995	13326076	+	LL0000033191	XLOC_008293	low confidence,XP_021325306.1,dock3,dedicator of cytokinesis 3, transcript variant X11	low confidence,NP_510869.1,BCCIP,BRCA2 and CDKN1A-interacting protein isoform C	1	no	discard	single exon with low confidence or no Blast hit
chr15	13948615	13953890	+	LL0000033192	XLOC_008296	low confidence,XP_021326442.1,LOC101887189,uncharacterized LOC101887189	no Blast hit	1	no	discard	single exon with low confidence or no Blast hit
chr15	14223386	14224864	+	LL0000033193	XLOC_008303	low confidence,XP_002665776.1,LOC100332023,uncharacterized LOC100332023	low confidence,NP_004236.1,TGM5,protein-glutamine gamma-glutamyltransferase 5 isoform 2	2	no	keep	more than one exon
chr15	14966313	14969847	+	LL0000033194	XLOC_008310	low confidence,NP_001074458.1,dennd4a,DENN/MADD domain containing 4A	no Blast hit	1	no	discard	single exon with low confidence or no Blast hit
chr15	16553345	16554832	+	LL0000033195	XLOC_008351	low confidence,XP_021333777.1,LOC110439968,GTPase IMAP family member 4-like	low confidence,XP_016862526.1,MTMR14,myotubularin-related protein 14 isoform X5	1	no	discard	single exon with low confidence or no Blast hit
chr15	16705329	16707092	+	LL0000033196	XLOC_008352	low confidence,XP_001343419.2,si:ch73-195i19.3,si:ch73-195i19.3	low confidence,NP_996880.1,GPR152,probable G-protein coupled receptor 152	1	no	discard	single exon with low confidence or no Blast hit
chr15	17433202	17434947	+	LL0000033197	XLOC_008367	high confidence,XP_009289536.1,si:ch211-276i12.9,si:ch211-276i12.9	low confidence,NP_001004720.1,NCK2,cytoplasmic protein NCK2 isoform A	1	no	keep	high/moderate confidence zebrafish BLAST hit
chr15	17435187	17436345	+	LL0000033198	XLOC_008368	low confidence,NP_001106978.1,il23r,interleukin 23 receptor	no Blast hit	1	no	discard	single exon with low confidence or no Blast hit
chr15	17439330	17440439	+	LL0000033199	XLOC_008369	low confidence,XP_003198845.1,si:ch73-194h10.3,si:ch73-194h10.3	no Blast hit	1	no	discard	single exon with low confidence or no Blast hit
chr15	17501772	17503710	+	LL0000033200	XLOC_008371	low confidence,XP_021326442.1,LOC101887189,uncharacterized LOC101887189	no Blast hit	1	no	discard	single exon with low confidence or no Blast hit
chr15	19614042	19614573	+	LL0000033201	XLOC_008390	low confidence,XP_009294217.1,si:ch211-239m17.1,si:ch211-239m17.1, transcript variant X1	low confidence,XP_016864670.1,DNAH5,dynein heavy chain 5, axonemal isoform X6	1	no	discard	single exon with low confidence or no Blast hit
chr15	19619773	19620734	+	LL0000033202	XLOC_008391	high confidence,XP_021324313.1,ftr06,finTRIM family, member 6, transcript variant X1	low confidence,XP_011511997.1,DTHD1,death domain-containing protein 1 isoform X5	1	no	keep	high/moderate confidence zebrafish BLAST hit
chr15	19640264	19640793	+	LL0000033203	XLOC_008392	low confidence,NP_954971.2,gclc,glutamate-cysteine ligase, catalytic subunit	low confidence,NP_057576.2,RANGRF,ran guanine nucleotide release factor isoform A	1	no	discard	single exon with low confidence or no Blast hit
chr15	20046421	20049371	+	LL0000033204	XLOC_008420	low confidence,XP_021323083.1,LOC110438040,uncharacterized LOC110438040	no Blast hit	2	no	keep	more than one exon
chr15	20125626	20127187	+	LL0000033205	XLOC_008421	low confidence,XP_003198845.1,si:ch73-194h10.3,si:ch73-194h10.3	low confidence,NP_055907.3,SMG1,serine/threonine-protein kinase SMG1	1	no	discard	single exon with low confidence or no Blast hit
chr15	22119166	22121023	+	LL0000033206	XLOC_008451	no Blast hit	no Blast hit	1	no	discard	single exon with low confidence or no Blast hit
chr15	22309511	22311536	+	LL0000033207	XLOC_008454	low confidence,XP_021323407.1,LOC101885127,uncharacterized LOC101885127, transcript variant X2	low confidence,NP_001159827.1,LFNG,beta-1,3-N-acetylglucosaminyltransferase lunatic fringe isoform c	1	no	discard	single exon with low confidence or no Blast hit
chr15	24194020	24195117	+	LL0000033208	XLOC_008474	high confidence,XP_021331267.1,LOC110439519,uncharacterized LOC110439519	low confidence,NP_079357.2,NYNRIN,protein NYNRIN	1	no	keep	high/moderate confidence zebrafish BLAST hit
chr15	24195600	24197723	+	LL0000033209	XLOC_008475	high confidence,XP_021331267.1,LOC110439519,uncharacterized LOC110439519	high confidence,NP_001128360.1,RTL1,retrotransposon-like protein 1	1	no	keep	high/moderate confidence zebrafish BLAST hit
chr15	24571235	24572359	+	LL0000033210	XLOC_008479	low confidence,XP_009289666.1,igsf10,immunoglobulin superfamily, member 10	no Blast hit	1	no	discard	single exon with low confidence or no Blast hit
chr15	25070575	25076661	+	LL0000033211	XLOC_008494	low confidence,XP_003198845.1,si:ch73-194h10.3,si:ch73-194h10.3	low confidence,NP_002798.2,PSMD1,26S proteasome non-ATPase regulatory subunit 1 isoform 1	2	no	keep	more than one exon
chr15	25696900	25698765	+	LL0000033212	XLOC_008505	no Blast hit	no Blast hit	1	no	discard	single exon with low confidence or no Blast hit
chr15	25698897	25700669	+	LL0000033213	XLOC_008506	low confidence,NP_001154967.1,mettl20,methyltransferase like 20	no Blast hit	1	no	discard	single exon with low confidence or no Blast hit
chr15	25700803	25702665	+	LL0000033214	XLOC_008507	moderate confidence,NP_001106978.1,il23r,interleukin 23 receptor	low confidence,XP_016874049.1,INTS4,integrator complex subunit 4 isoform X1	1	no	keep	high/moderate confidence zebrafish BLAST hit
chr15	25703929	25707453	+	LL0000033215	XLOC_008508	low confidence,XP_021335606.1,LOC101886098,Fc receptor-like protein 5, transcript variant X5	no Blast hit	1	no	discard	single exon with low confidence or no Blast hit
chr15	26109321	26114088	+	LL0000033216	XLOC_008513	no Blast hit	no Blast hit	1	no	discard	single exon with low confidence or no Blast hit
chr15	27631523	27632961	+	LL0000033217	XLOC_008525	low confidence,XP_021330706.1,tnnt2e,troponin T2e, cardiac, transcript variant X8	no Blast hit	1	no	discard	single exon with low confidence or no Blast hit
chr15	27711540	27712942	+	LL0000033218	XLOC_008526	low confidence,XP_009291446.1,ect2l,epithelial cell transforming 2 like, transcript variant X4	no Blast hit	1	no	discard	single exon with low confidence or no Blast hit
chr15	27724411	27725678	+	LL0000033219	XLOC_008527	no Blast hit	low confidence,NP_055946.1,WDR43,WD repeat-containing protein 43	1	no	discard	single exon with low confidence or no Blast hit
chr15	27869755	27870319	+	LL0000033220	XLOC_008529	low confidence,XP_692445.3,pigo,phosphatidylinositol glycan anchor biosynthesis, class O	no Blast hit	1	no	discard	single exon with low confidence or no Blast hit
chr15	32745590	32746365	+	LL0000033221	XLOC_008601	moderate confidence,XP_017214605.1,LOC108192163,uncharacterized LOC108192163	low confidence,XP_011539202.1,FYB2,FYN-binding protein 2 isoform X3	1	no	keep	high/moderate confidence zebrafish BLAST hit
chr15	32746600	32747582	+	LL0000033222	XLOC_008602	high confidence,XP_017212911.1,LOC103911479,uncharacterized LOC103911479	no Blast hit	1	no	keep	high/moderate confidence zebrafish BLAST hit
chr15	35347247	35349543	+	LL0000033223	XLOC_008632	no Blast hit	no Blast hit	1	no	discard	single exon with low confidence or no Blast hit
chr15	35361274	35361325	+	LL0000033224	XLOC_008633	low confidence,XP_009294184.1,si:zfos-943e10.1,si:zfos-943e10.1, transcript variant X2	no Blast hit	1	no	discard	single exon with low confidence or no Blast hit
chr15	36253144	36254000	+	LL0000033225	XLOC_008644	no Blast hit	low confidence,XP_011538476.1,PLEKHS1,pleckstrin homology domain-containing family S member 1 isoform X5	1	no	discard	single exon with low confidence or no Blast hit
chr15	37375305	37376669	+	LL0000033226	XLOC_008651	no Blast hit	no Blast hit	1	no	discard	single exon with low confidence or no Blast hit
chr15	37376989	37379024	+	LL0000033227	XLOC_008652	no Blast hit	no Blast hit	1	no	discard	single exon with low confidence or no Blast hit
chr15	38336263	38337100	+	LL0000033228	XLOC_008676	no Blast hit	no Blast hit	1	no	discard	single exon with low confidence or no Blast hit
chr15	39842343	39845562	+	LL0000033229	XLOC_008680	low confidence,NP_001076334.1,si:ch211-262h13.3,si:ch211-262h13.3	no Blast hit	5	no	keep	more than one exon
chr15	41069020	41080153	+	LL0000033230	XLOC_008693	no Blast hit	no Blast hit	3	no	keep	more than one exon
chr15	41544748	41547643	+	LL0000033231	XLOC_008694	exact match,XP_017206740.2,LOC101884369,uncharacterized LOC101884369, transcript variant X3	low confidence,XP_005250568.1,RHBDD2,rhomboid domain-containing protein 2 isoform X1	5	no	discard	identified as duplicate with existing V4.2/RefSeq annotation
chr15	42554467	42556114	+	LL0000033232	XLOC_008708	moderate confidence,NP_001106978.1,il23r,interleukin 23 receptor	no Blast hit	1	no	keep	high/moderate confidence zebrafish BLAST hit
chr15	42556240	42558075	+	LL0000033233	XLOC_008709	no Blast hit	low confidence,XP_024309059.1,TNK2,activated CDC42 kinase 1 isoform X6	1	no	discard	single exon with low confidence or no Blast hit
chr15	42682853	42684840	+	LL0000033234	XLOC_008713	low confidence,XP_021327787.1,LOC103910200,sterile alpha motif domain-containing protein 9-like	no Blast hit	1	no	discard	single exon with low confidence or no Blast hit
chr15	42686521	42688127	+	LL0000033235	XLOC_008714	low confidence,NP_001121732.1,cdk14,cyclin-dependent kinase 14	no Blast hit	1	no	discard	single exon with low confidence or no Blast hit
chr15	42984217	42991079	+	LL0000033236	XLOC_008716	low confidence,XP_003199319.1,sgsm1b,small G protein signaling modulator 1b, transcript variant X1	no Blast hit	1	no	discard	single exon with low confidence or no Blast hit
chr15	43392238	43392854	+	LL0000033237	XLOC_008724	moderate confidence,NP_001106978.1,il23r,interleukin 23 receptor	no Blast hit	1	no	keep	high/moderate confidence zebrafish BLAST hit
chr15	43396126	43397962	+	LL0000033238	XLOC_008725	low confidence,XP_009303624.1,ccdc83,coiled-coil domain containing 83, transcript variant X2	no Blast hit	1	no	discard	single exon with low confidence or no Blast hit
chr15	43820775	43822211	+	LL0000033239	XLOC_008728	low confidence,XP_017209945.1,usp15,ubiquitin specific peptidase 15	low confidence,XP_016877963.1,RYR3,ryanodine receptor 3 isoform X8	1	no	discard	single exon with low confidence or no Blast hit
chr15	43943387	43944630	+	LL0000033240	XLOC_008731	low confidence,XP_021333697.1,mical2a,microtubule associated monooxygenase, calponin and LIM domain containing 2a, transcript variant X7	no Blast hit	5	no	discard	identified as duplicate with existing V4.2/RefSeq annotation
chr15	43951823	43953598	+	LL0000033241	XLOC_008733	low confidence,XP_009302241.1,si:ch211-196c10.15,si:ch211-196c10.15, transcript variant X2	low confidence,XP_016884504.1,MYO18B,unconventional myosin-XVIIIb isoform X5	1	no	discard	single exon with low confidence or no Blast hit
chr15	43954006	43955531	+	LL0000033242	XLOC_008734	high confidence,XP_017214605.1,LOC108192163,uncharacterized LOC108192163	low confidence,NP_000895.2,NQO2,ribosyldihydronicotinamide dehydrogenase [quinone] isoform 1	1	no	keep	high/moderate confidence zebrafish BLAST hit
chr15	44129396	44130482	+	LL0000033243	XLOC_008739	no Blast hit	no Blast hit	1	no	discard	single exon with low confidence or no Blast hit
chr15	44358291	44359195	+	LL0000033244	XLOC_008752	no Blast hit	no Blast hit	1	no	discard	single exon with low confidence or no Blast hit
chr15	45851857	45853036	+	LL0000033245	XLOC_008765	no Blast hit	no Blast hit	1	no	discard	single exon with low confidence or no Blast hit
chr15	45941289	45942044	+	LL0000033246	XLOC_008766	no Blast hit	no Blast hit	1	no	discard	single exon with low confidence or no Blast hit
chr15	46136544	46139084	+	LL0000033247	XLOC_008768	no Blast hit	no Blast hit	1	no	discard	single exon with low confidence or no Blast hit
chr15	46627079	46628102	+	LL0000033248	XLOC_008781	moderate confidence,NP_001025454.1,ldlra,low density lipoprotein receptor a	low confidence,XP_011516852.1,GLE1,nucleoporin GLE1 isoform X1	1	no	keep	high/moderate confidence zebrafish BLAST hit
chr15	46848430	46849681	+	LL0000033249	XLOC_008785	low confidence,XP_021330502.1,ftr46,finTRIM family, member 46, transcript variant X1	no Blast hit	1	no	discard	single exon with low confidence or no Blast hit
chr15	47261428	47262922	+	LL0000033250	XLOC_008790	no Blast hit	no Blast hit	1	no	discard	single exon with low confidence or no Blast hit
chr15	47264749	47265719	+	LL0000033251	XLOC_008791	low confidence,NP_001025454.1,ldlra,low density lipoprotein receptor a	low confidence,NP_001165459.1,AGA,N(4)-(beta-N-acetylglucosaminyl)-L-asparaginase isoform 2 precursor	1	no	discard	single exon with low confidence or no Blast hit
chr15	47319858	47320592	+	LL0000033252	XLOC_008792	low confidence,XP_021326971.1,si:ch211-66k16.28,si:ch211-66k16.28, transcript variant X3	no Blast hit	1	no	discard	single exon with low confidence or no Blast hit
chr15	47479993	47481486	+	LL0000033253	XLOC_008799	no Blast hit	no Blast hit	1	no	discard	single exon with low confidence or no Blast hit
chr15	47592913	47594091	+	LL0000033254	XLOC_008803	low confidence,XP_021326182.1,ano10b,anoctamin 10b, transcript variant X1	no Blast hit	1	no	discard	single exon with low confidence or no Blast hit
chr15	47597204	47597801	+	LL0000033255	XLOC_008804	no Blast hit	low confidence,XP_006718857.1,CEP164,centrosomal protein of 164 kDa isoform X17	2	no	keep	more than one exon
chr15	47968229	47972197	+	LL0000033256	XLOC_008814	low confidence,XP_017211226.1,LOC108183929,gastrula zinc finger protein XlCGF8.2DB-like	no Blast hit	1	no	discard	single exon with low confidence or no Blast hit
chr15	5144	9588	-	LL0000033257	XLOC_008815	low confidence,XP_021330274.1,si:ch73-194h10.3,si:ch73-194h10.3	no Blast hit	1	no	discard	single exon with low confidence or no Blast hit
chr15	112272	114208	-	LL0000033258	XLOC_008820	low confidence,NP_001025454.1,ldlra,low density lipoprotein receptor a	no Blast hit	1	no	discard	single exon with low confidence or no Blast hit
chr15	255139	260097	-	LL0000033259	XLOC_008823	moderate confidence,XP_001344635.2,LOC100005637,uncharacterized LOC100005637	no Blast hit	8	no	keep	high/moderate confidence zebrafish BLAST hit
chr15	3108378	3108981	-	LL0000033260	XLOC_008887	no Blast hit	low confidence,NP_001316155.1,LRP10,low-density lipoprotein receptor-related protein 10 isoform 2 precursor	1	no	discard	single exon with low confidence or no Blast hit
chr15	3238124	3239236	-	LL0000033261	XLOC_008889	no Blast hit	no Blast hit	1	no	discard	single exon with low confidence or no Blast hit
chr15	4871360	4902359	-	LL0000033262	XLOC_008912	low confidence,XP_017206661.1,si:dkey-103g5.4,si:dkey-103g5.4, transcript variant X1	low confidence,XP_011532445.1,GRIP2,glutamate receptor-interacting protein 2 isoform X3	2	no	keep	more than one exon
chr15	5008245	5008893	-	LL0000033263	XLOC_008914	low confidence,XP_021328785.1,ank3a,ankyrin 3a, transcript variant X20	no Blast hit	1	no	discard	single exon with low confidence or no Blast hit
chr15	5384269	5389278	-	LL0000033264	XLOC_008935	low confidence,XP_009303624.1,ccdc83,coiled-coil domain containing 83, transcript variant X2	moderate confidence,NP_067034.2,ZBED5,zinc finger BED domain-containing protein 5	2	no	keep	moderate confidence BLAST hit to human protein
chr15	5468063	5471385	-	LL0000033265	XLOC_008937	low confidence,XP_021335606.1,LOC101886098,Fc receptor-like protein 5, transcript variant X5	no Blast hit	1	no	discard	single exon with low confidence or no Blast hit
chr15	5471478	5472913	-	LL0000033266	XLOC_008938	low confidence,NP_001025454.1,ldlra,low density lipoprotein receptor a	no Blast hit	1	no	discard	single exon with low confidence or no Blast hit
chr15	5473288	5475568	-	LL0000033267	XLOC_008939	no Blast hit	no Blast hit	1	no	discard	single exon with low confidence or no Blast hit
chr15	7280871	7281939	-	LL0000033268	XLOC_008958	no Blast hit	no Blast hit	1	no	discard	single exon with low confidence or no Blast hit
chr15	7289327	7289836	-	LL0000033269	XLOC_008959	low confidence,XP_021325793.1,gli3,GLI family zinc finger 3, transcript variant X1	no Blast hit	1	no	discard	single exon with low confidence or no Blast hit
chr15	8420233	8421175	-	LL0000033270	XLOC_008965	no Blast hit	no Blast hit	1	no	discard	single exon with low confidence or no Blast hit
chr15	8919056	8920144	-	LL0000033271	XLOC_008969	low confidence,XP_021324713.1,si:dkey-11o18.5,si:dkey-11o18.5, transcript variant X2	no Blast hit	1	no	discard	single exon with low confidence or no Blast hit
chr15	10943569	10944150	-	LL0000033272	XLOC_008985	low confidence,XP_021325971.1,zfhx2,zinc finger homeobox 2, transcript variant X2	low confidence,NP_001354352.1,ARHGAP9,rho GTPase-activating protein 9 isoform 8	1	no	discard	single exon with low confidence or no Blast hit
chr15	10952621	10953570	-	LL0000033273	XLOC_008986	no Blast hit	no Blast hit	1	no	discard	single exon with low confidence or no Blast hit
chr15	11163884	11164449	-	LL0000033274	XLOC_008989	low confidence,XP_021334226.1,LOC110440028,nephrocystin-4-like	low confidence,NP_065820.1,RTL9,retrotransposon Gag-like protein 9	1	no	discard	single exon with low confidence or no Blast hit
chr15	11398565	11399883	-	LL0000033275	XLOC_008993	high confidence,XP_021322528.1,LOC110437969,uncharacterized LOC110437969	low confidence,XP_024302798.1,LOC112267992,uncharacterized protein LOC112267992	1	no	keep	high/moderate confidence zebrafish BLAST hit
chr15	11465895	11467913	-	LL0000033276	XLOC_008994	high confidence,XP_005161371.1,LOC101886778,uncharacterized LOC101886778	low confidence,NP_001276018.1,ZMYM1,zinc finger MYM-type protein 1 isoform c	3	no	discard	identified as duplicate with existing V4.2/RefSeq annotation
chr15	11469698	11469994	-	LL0000033277	XLOC_008995	low confidence,XP_017212916.2,cacna1e,calcium voltage-gated channel subunit alpha1 E, transcript variant X4	low confidence,XP_016857739.1,CACNA1E,voltage-dependent R-type calcium channel subunit alpha-1E isoform X8	1	no	discard	single exon with low confidence or no Blast hit
chr15	12323496	12324093	-	LL0000033278	XLOC_009004	no Blast hit	no Blast hit	1	no	discard	single exon with low confidence or no Blast hit
chr15	12567460	12567631	-	LL0000033279	XLOC_009010	low confidence,XP_021327764.1,LOC110438806,GTPase IMAP family member 8-like	low confidence,XP_011540167.1,MIER1,mesoderm induction early response protein 1 isoform X1	1	no	discard	single exon with low confidence or no Blast hit
chr15	13320383	13321462	-	LL0000033280	XLOC_009013	no Blast hit	no Blast hit	1	no	discard	single exon with low confidence or no Blast hit
chr15	13322032	13323179	-	LL0000033281	XLOC_009014	low confidence,XP_003201740.3,LOC100535396,TM2 domain-containing protein 1-like	no Blast hit	1	no	discard	single exon with low confidence or no Blast hit
chr15	14430304	14434018	-	LL0000033282	XLOC_009026	low confidence,XP_021331733.1,si:dkey-194g4.1,si:dkey-194g4.1, transcript variant X1	no Blast hit	1	no	discard	single exon with low confidence or no Blast hit
chr15	15059588	15060317	-	LL0000033283	XLOC_009036	low confidence,XP_017214605.1,LOC108192163,uncharacterized LOC108192163	low confidence,NP_002418.1,MMP13,collagenase 3 preproprotein	1	no	discard	single exon with low confidence or no Blast hit
chr15	15128431	15131905	-	LL0000033284	XLOC_009038	exact match,XP_021322012.1,LOC103908824,uncharacterized LOC103908824, transcript variant X2	low confidence,NP_060239.2,G2E3,G2/M phase-specific E3 ubiquitin-protein ligase isoform 1	9	no	discard	identified as duplicate with existing V4.2/RefSeq annotation
chr15	15453398	15454942	-	LL0000033285	XLOC_009044	low confidence,NP_957086.1,arr3b,arrestin 3b, retinal (X-arrestin)	no Blast hit	1	no	discard	single exon with low confidence or no Blast hit
chr15	16450231	16450527	-	LL0000033286	XLOC_009058	low confidence,XP_005155927.1,matn4,matrilin 4, transcript variant X9	no Blast hit	1	no	discard	single exon with low confidence or no Blast hit
chr15	17525222	17526946	-	LL0000033287	XLOC_009120	low confidence,XP_021330706.1,tnnt2e,troponin T2e, cardiac, transcript variant X8	no Blast hit	1	no	discard	single exon with low confidence or no Blast hit
chr15	17527918	17532064	-	LL0000033288	XLOC_009121	moderate confidence,NP_001139173.1,si:ch211-168h21.3,si:ch211-168h21.3	low confidence,XP_016856295.1,ZCCHC11,terminal uridylyltransferase 4 isoform X11	1	no	keep	high/moderate confidence zebrafish BLAST hit
chr15	18364425	18366592	-	LL0000033289	XLOC_009139	low confidence,NP_001315129.1,si:dkey-77f5.3,si:dkey-77f5.3	low confidence,NP_001291892.1,NUDT10,diphosphoinositol polyphosphate phosphohydrolase 3-alpha	1	no	discard	single exon with low confidence or no Blast hit
chr15	19275655	19276219	-	LL0000033290	XLOC_009144	low confidence,XP_697108.5,atp2a3,ATPase, Ca++ transporting, ubiquitous, transcript variant X1	low confidence,XP_016863010.1,SH3BP5,SH3 domain-binding protein 5 isoform X1	1	no	discard	single exon with low confidence or no Blast hit
chr15	20056124	20057608	-	LL0000033291	XLOC_009184	no Blast hit	no Blast hit	1	no	discard	single exon with low confidence or no Blast hit
chr15	21494014	21495152	-	LL0000033292	XLOC_009209	low confidence,XP_021329498.1,ttc21a,tetratricopeptide repeat domain 21A, transcript variant X4	no Blast hit	1	no	discard	single exon with low confidence or no Blast hit
chr15	24142908	24143558	-	LL0000033293	XLOC_009247	no Blast hit	no Blast hit	1	no	discard	single exon with low confidence or no Blast hit
chr15	24904455	24905942	-	LL0000033294	XLOC_009255	no Blast hit	no Blast hit	1	no	discard	single exon with low confidence or no Blast hit
chr15	24920797	24922438	-	LL0000033295	XLOC_009256	low confidence,NP_001352095.1,robo1,roundabout homolog 1 isoform 1 precursor	no Blast hit	1	no	discard	single exon with low confidence or no Blast hit
chr15	24910160	24912199	-	LL0000033296	XLOC_009257	moderate confidence,NP_001106978.1,il23r,interleukin 23 receptor	low confidence,XP_011511010.1,IGSF10,immunoglobulin superfamily member 10 isoform X1	1	no	keep	high/moderate confidence zebrafish BLAST hit
chr15	26641612	26643030	-	LL0000033297	XLOC_009288	no Blast hit	no Blast hit	1	no	discard	single exon with low confidence or no Blast hit
chr15	26644216	26657559	-	LL0000033298	XLOC_009289	high confidence,XP_017210001.1,LOC100537389,multidrug and toxin extrusion protein 1-like	high confidence,NP_060712.2,SLC47A1,multidrug and toxin extrusion protein 1	17	no	keep	high/moderate confidence zebrafish BLAST hit
chr15	27699290	27701279	-	LL0000033299	XLOC_009300	no Blast hit	no Blast hit	1	no	discard	single exon with low confidence or no Blast hit
chr15	27890750	27891404	-	LL0000033300	XLOC_009302	high confidence,NP_001076334.1,si:ch211-262h13.3,si:ch211-262h13.3	no Blast hit	3	no	discard	identified as duplicate with existing V4.2/RefSeq annotation
chr15	29484520	29484873	-	LL0000033301	XLOC_009326	no Blast hit	no Blast hit	1	no	discard	single exon with low confidence or no Blast hit
chr15	29491014	29491399	-	LL0000033302	XLOC_009327	low confidence,XP_017208927.1,zranb3,zinc finger, RAN-binding domain containing 3	no Blast hit	1	no	discard	single exon with low confidence or no Blast hit
chr15	30359455	30361323	-	LL0000033303	XLOC_009340	low confidence,XP_005167122.1,ahcyl1,adenosylhomocysteinase-like 1, transcript variant X1	no Blast hit	4	no	keep	more than one exon
chr15	33684395	33685618	-	LL0000033304	XLOC_009380	no Blast hit	no Blast hit	1	no	discard	single exon with low confidence or no Blast hit
chr15	34703758	34713598	-	LL0000033305	XLOC_009398	low confidence,NP_001025454.1,ldlra,low density lipoprotein receptor a	no Blast hit	1	no	discard	single exon with low confidence or no Blast hit
chr15	36424328	36424474	-	LL0000033306	XLOC_009421	low confidence,XP_021332758.1,atp11a,ATPase, class VI, type 11A, transcript variant X1	low confidence,NP_002898.2,RECQL,ATP-dependent DNA helicase Q1	1	no	discard	single exon with low confidence or no Blast hit
chr15	38824417	38825333	-	LL0000033307	XLOC_009457	low confidence,XP_017207362.1,LOC108179808,gastrula zinc finger protein XlCGF71.1-like	no Blast hit	1	no	discard	single exon with low confidence or no Blast hit
chr15	42211397	42219454	-	LL0000033308	XLOC_009496	low confidence,NP_001003489.1,tm4sf4,transmembrane 4 L six family member 4	no Blast hit	3	no	keep	more than one exon
chr15	42220010	42221781	-	LL0000033309	XLOC_009497	low confidence,NP_001138271.1,gnaq,guanine nucleotide binding protein (G protein), q polypeptide	no Blast hit	1	no	discard	single exon with low confidence or no Blast hit
chr15	42221944	42223570	-	LL0000033310	XLOC_009498	low confidence,NP_001025454.1,ldlra,low density lipoprotein receptor a	no Blast hit	1	no	discard	single exon with low confidence or no Blast hit
chr15	43148234	43148820	-	LL0000033311	XLOC_009507	low confidence,NP_001038409.1,jtb,jumping translocation breakpoint	no Blast hit	1	no	discard	single exon with low confidence or no Blast hit
chr15	43599412	43600654	-	LL0000033312	XLOC_009513	no Blast hit	no Blast hit	1	no	discard	single exon with low confidence or no Blast hit
chr15	43877439	43878332	-	LL0000033313	XLOC_009517	no Blast hit	no Blast hit	1	no	discard	single exon with low confidence or no Blast hit
chr15	44078780	44080271	-	LL0000033314	XLOC_009525	moderate confidence,XP_017212911.1,LOC103911479,uncharacterized LOC103911479	no Blast hit	1	no	keep	high/moderate confidence zebrafish BLAST hit
chr15	44119233	44123345	-	LL0000033315	XLOC_009527	high confidence,XP_017206762.1,LOC100329885,zinc finger protein 239-like	high confidence,NP_001341760.1,ZNF214,zinc finger protein 214 isoform 2	4	no	keep	high/moderate confidence zebrafish BLAST hit
chr15	44151276	44154000	-	LL0000033316	XLOC_009529	no Blast hit	no Blast hit	1	no	discard	single exon with low confidence or no Blast hit
chr15	44154343	44156344	-	LL0000033317	XLOC_009530	low confidence,XP_003200160.3,LOC100332535,uncharacterized LOC100332535	no Blast hit	1	no	discard	single exon with low confidence or no Blast hit
chr15	45327606	45328894	-	LL0000033318	XLOC_009541	low confidence,NP_001074053.2,mavs,mitochondrial antiviral signaling protein, transcript variant 2	moderate confidence,NP_001161403.1,IL1RAP,interleukin-1 receptor accessory protein isoform 3 precursor	1	no	keep	moderate confidence BLAST hit to human protein
chr15	45333845	45335013	-	LL0000033319	XLOC_009542	no Blast hit	no Blast hit	1	no	discard	single exon with low confidence or no Blast hit
chr15	45335128	45336449	-	LL0000033320	XLOC_009543	low confidence,NP_001106978.1,il23r,interleukin 23 receptor	no Blast hit	1	no	discard	single exon with low confidence or no Blast hit
chr15	45860487	45861678	-	LL0000033321	XLOC_009547	low confidence,XP_021322559.1,tnxba,tenascin XBa, transcript variant X2	no Blast hit	1	no	discard	single exon with low confidence or no Blast hit
chr15	46203792	46213934	-	LL0000033322	XLOC_009548	no Blast hit	no Blast hit	5	no	keep	more than one exon
chr15	46675193	46677832	-	LL0000033323	XLOC_009550	high confidence,NP_001106978.1,il23r,interleukin 23 receptor	no Blast hit	1	no	keep	high/moderate confidence zebrafish BLAST hit
chr15	47092695	47093365	-	LL0000033324	XLOC_009557	matches or overlaps with known lincRNA	no Blast hit	1	yes	keep	maps to previously identified lincRNA
chr15	47093458	47094227	-	LL0000033325	XLOC_009558	matches or overlaps with known lincRNA	no Blast hit	1	yes	keep	maps to previously identified lincRNA
chr15	47193809	47195523	-	LL0000033326	XLOC_009561	no Blast hit	no Blast hit	1	no	discard	single exon with low confidence or no Blast hit
chr15	47247429	47248741	-	LL0000033327	XLOC_009562	low confidence,NP_001017891.1,zgc:113019,zgc:113019	low confidence,XP_011509978.1,AQP12B,aquaporin-12B isoform X6	2	no	keep	more than one exon
chr15	47632279	47636875	-	LL0000033328	XLOC_009568	high confidence,XP_021322215.1,LOC110437937,arf-GAP with Rho-GAP domain, ANK repeat and PH domain-containing protein 1-like	high confidence,NP_001128662.1,ARAP1,arf-GAP with Rho-GAP domain, ANK repeat and PH domain-containing protein 1 isoform d	6	no	keep	high/moderate confidence zebrafish BLAST hit
chr15	47655684	47656767	-	LL0000033329	XLOC_009571	low confidence,XP_021325375.1,si:rp71-23d18.4,si:rp71-23d18.4, transcript variant X1	low confidence,NP_001229558.1,GFOD1,glucose-fructose oxidoreductase domain-containing protein 1 isoform 3 precursor	1	no	discard	single exon with low confidence or no Blast hit
chr15	47897968	47898376	-	LL0000033330	XLOC_009576	low confidence,XP_021332398.1,cita,citron rho-interacting serine/threonine kinase a, transcript variant X1	low confidence,XP_016885290.1,ZFX,zinc finger X-chromosomal protein isoform X8	1	no	discard	single exon with low confidence or no Blast hit
chr16	75010	75792	+	LL0000033331	XLOC_009589	no Blast hit	low confidence,XP_011512761.1,NCR3,natural cytotoxicity triggering receptor 3 isoform X2	1	no	discard	single exon with low confidence or no Blast hit
chr16	106562	107153	+	LL0000033332	XLOC_009590	low confidence,NP_001038436.1,bmp8a,bone morphogenetic protein 8a	low confidence,XP_016870107.1,FBXO10,F-box only protein 10 isoform X1	1	no	discard	single exon with low confidence or no Blast hit
chr16	140536	140760	+	LL0000033333	XLOC_009591	no Blast hit	low confidence,XP_016861498.1,ATP11B,probable phospholipid-transporting ATPase IF isoform X7	1	no	discard	single exon with low confidence or no Blast hit
chr16	2142377	2145639	+	LL0000033334	XLOC_009608	low confidence,XP_002663431.2,si:ch73-7i4.2,si:ch73-7i4.2	no Blast hit	7	no	keep	more than one exon
chr16	2420306	2422203	+	LL0000033335	XLOC_009610	high confidence,XP_017206934.2,LOC108179554,uncharacterized LOC108179554	high confidence,NP_001007272.1,DUSP13,dual specificity protein phosphatase 13 isoform 1	3	no	discard	identified as duplicate with existing V4.2/RefSeq annotation
chr16	3036705	3039469	+	LL0000033336	XLOC_009622	high confidence,XP_021322481.1,LOC110437965,uncharacterized LOC110437965	low confidence,NP_001007272.1,DUSP13,dual specificity protein phosphatase 13 isoform 1	1	no	keep	high/moderate confidence zebrafish BLAST hit
chr16	3147353	3150530	+	LL0000033337	XLOC_009626	low confidence,XP_021324770.1,si:dkey-29d5.2,si:dkey-29d5.2	no Blast hit	7	no	discard	identified as duplicate with existing V4.2/RefSeq annotation
chr16	3313515	3315422	+	LL0000033338	XLOC_009629	low confidence,XP_021333852.1,LOC110439990,uncharacterized LOC110439990	no Blast hit	8	no	keep	more than one exon
chr16	3426073	3428063	+	LL0000033339	XLOC_009631	low confidence,XP_021326489.1,kcnip1a,Kv channel interacting protein 1 a	no Blast hit	1	no	discard	single exon with low confidence or no Blast hit
chr16	3793049	3794100	+	LL0000033340	XLOC_009632	high confidence,XP_021323077.1,cuzd1.1,CUB and zona pellucida-like domains 1, tandem duplicate 1	low confidence,NP_001139812.1,NKX1-2,NK1 transcription factor-related protein 2	1	no	keep	high/moderate confidence zebrafish BLAST hit
chr16	3948027	3949004	+	LL0000033341	XLOC_009635	no Blast hit	no Blast hit	1	no	discard	single exon with low confidence or no Blast hit
chr16	4169247	4175022	+	LL0000033342	XLOC_009640	no Blast hit	low confidence,XP_016864377.1,LOC107986217,DNA-directed RNA polymerase II subunit 1-like	2	no	keep	more than one exon
chr16	5172417	5173580	+	LL0000033343	XLOC_009652	no Blast hit	no Blast hit	1	no	discard	single exon with low confidence or no Blast hit
chr16	5588727	5589386	+	LL0000033344	XLOC_009656	no Blast hit	no Blast hit	1	no	discard	single exon with low confidence or no Blast hit
chr16	6593901	6594669	+	LL0000033345	XLOC_009664	low confidence,XP_021321960.1,brip1,BRCA1 interacting protein C-terminal helicase 1, transcript variant X3	no Blast hit	1	no	discard	single exon with low confidence or no Blast hit
chr16	7197682	7198728	+	LL0000033346	XLOC_009672	low confidence,XP_695016.2,LOC566646,uncharacterized LOC566646, transcript variant X1	low confidence,XP_011528820.1,GAL3ST1,galactosylceramide sulfotransferase isoform X1	1	no	discard	single exon with low confidence or no Blast hit
chr16	7734816	7735692	+	LL0000033347	XLOC_009683	low confidence,XP_003198845.1,si:ch73-194h10.3,si:ch73-194h10.3	no Blast hit	1	no	discard	single exon with low confidence or no Blast hit
chr16	9571602	9571673	+	LL0000033348	XLOC_009698	low confidence,XP_021323695.1,pabpc1b,poly A binding protein, cytoplasmic 1 b, transcript variant X1	no Blast hit	1	no	discard	single exon with low confidence or no Blast hit
chr16	9573219	9573291	+	LL0000033349	XLOC_009699	low confidence,NP_001004109.2,quo,quattro	no Blast hit	1	no	discard	single exon with low confidence or no Blast hit
chr16	10015680	10017045	+	LL0000033350	XLOC_009707	no Blast hit	no Blast hit	1	no	discard	single exon with low confidence or no Blast hit
chr16	10074133	10074826	+	LL0000033351	XLOC_009708	low confidence,XP_017214605.1,LOC108192163,uncharacterized LOC108192163	no Blast hit	1	no	discard	single exon with low confidence or no Blast hit
chr16	10720977	10723975	+	LL0000033352	XLOC_009720	low confidence,NP_001025454.1,ldlra,low density lipoprotein receptor a	low confidence,NP_036224.1,ICOS,inducible T-cell costimulator precursor	1	no	discard	single exon with low confidence or no Blast hit
chr16	11649707	11650269	+	LL0000033353	XLOC_009738	low confidence,NP_001020356.1,ompa,olfactory marker protein a	no Blast hit	1	no	discard	single exon with low confidence or no Blast hit
chr16	15310687	15310962	+	LL0000033354	XLOC_009779	low confidence,XP_009300795.1,slc9a7,solute carrier family 9, subfamily A (NHE7, cation proton antiporter 7), member 7, transcript variant X2	low confidence,XP_016862275.1,SETD5,histone-lysine N-methyltransferase SETD5 isoform X22	1	no	discard	single exon with low confidence or no Blast hit
chr16	15424230	15428058	+	LL0000033355	XLOC_009780	high confidence,XP_003199161.1,LOC100535543,uncharacterized protein K02A2.6-like	low confidence,XP_011535318.1,NYNRIN,protein NYNRIN isoform X1	2	no	keep	high/moderate confidence zebrafish BLAST hit
chr16	15719254	15723256	+	LL0000033356	XLOC_009781	high confidence,XP_005174467.2,LOC100334495,uncharacterized LOC100334495	low confidence,NP_004975.2,KIF5A,kinesin heavy chain isoform 5A isoform 1	1	no	keep	high/moderate confidence zebrafish BLAST hit
chr16	15711784	15737287	+	LL0000033357	XLOC_009783	low confidence,XP_009304348.1,iqsec1b,IQ motif and Sec7 domain 1b, transcript variant X7	low confidence,NP_001092759.1,SH3RF3,E3 ubiquitin-protein ligase SH3RF3 precursor	2	no	keep	more than one exon
chr16	15797450	15799091	+	LL0000033358	XLOC_009784	high confidence,XP_021333460.1,LOC108190663,uncharacterized LOC108190663	low confidence,XP_024302798.1,LOC112267992,uncharacterized protein LOC112267992	1	no	keep	high/moderate confidence zebrafish BLAST hit
chr16	15799458	15800315	+	LL0000033359	XLOC_009785	high confidence,XP_021332267.1,LOC110439817,uncharacterized LOC110439817	high confidence,XP_024302798.1,LOC112267992,uncharacterized protein LOC112267992	1	no	keep	high/moderate confidence zebrafish BLAST hit
chr16	15800902	15801789	+	LL0000033360	XLOC_009786	high confidence,XP_017210988.1,LOC101886882,uncharacterized LOC101886882, transcript variant X1	low confidence,XP_016869644.1,LOC105379356,uncharacterized protein LOC105379356 isoform X1	1	no	keep	high/moderate confidence zebrafish BLAST hit
chr16	15802305	15803932	+	LL0000033361	XLOC_009787	high confidence,XP_017206977.1,LOC103908925,uncharacterized LOC103908925	low confidence,XP_016864593.1,TMEM161B,transmembrane protein 161B isoform X12	1	no	keep	high/moderate confidence zebrafish BLAST hit
chr16	15884560	15886586	+	LL0000033362	XLOC_009789	low confidence,XP_021331061.1,LOC110439405,uncharacterized LOC110439405	low confidence,NP_001245144.1,IL12RB2,interleukin-12 receptor subunit beta-2 isoform c precursor	1	no	discard	single exon with low confidence or no Blast hit
chr16	15887961	15889766	+	LL0000033363	XLOC_009790	no Blast hit	no Blast hit	1	no	discard	single exon with low confidence or no Blast hit
chr16	16188928	16190209	+	LL0000033364	XLOC_009794	high confidence,XP_021331018.1,LOC110439387,gastrula zinc finger protein XlCGF28.1-like	no Blast hit	1	no	keep	high/moderate confidence zebrafish BLAST hit
chr16	16841705	16844635	+	LL0000033365	XLOC_009798	no Blast hit	no Blast hit	1	no	discard	single exon with low confidence or no Blast hit
chr16	16844762	16845904	+	LL0000033366	XLOC_009799	low confidence,XP_005171671.2,cbx6b,chromobox homolog 6b	no Blast hit	1	no	discard	single exon with low confidence or no Blast hit
chr16	17601008	17602836	+	LL0000033367	XLOC_009807	low confidence,NP_991260.2,plxnd1,plexin D1	no Blast hit	4	no	keep	more than one exon
chr16	17735278	17736081	+	LL0000033368	XLOC_009812	no Blast hit	no Blast hit	1	no	discard	single exon with low confidence or no Blast hit
chr16	18101106	18112558	+	LL0000033369	XLOC_009815	low confidence,XP_017213141.1,ptprna,protein tyrosine phosphatase, receptor type, Na, transcript variant X1	no Blast hit	3	no	keep	more than one exon
chr16	18108165	18109434	+	LL0000033370	XLOC_009816	no Blast hit	low confidence,XP_011514487.1,KCNH2,potassium voltage-gated channel subfamily H member 2 isoform X2	1	no	discard	single exon with low confidence or no Blast hit
chr16	18133746	18134314	+	LL0000033371	XLOC_009817	no Blast hit	no Blast hit	1	no	discard	single exon with low confidence or no Blast hit
chr16	18163177	18164260	+	LL0000033372	XLOC_009819	moderate confidence,XP_017212673.1,LOC101886404,protein translocase subunit SecA-like	low confidence,XP_016870685.1,CEP78,centrosomal protein of 78 kDa isoform X2	1	no	keep	high/moderate confidence zebrafish BLAST hit
chr16	18340182	18340685	+	LL0000033373	XLOC_009820	no Blast hit	no Blast hit	1	no	discard	single exon with low confidence or no Blast hit
chr16	18358491	18358837	+	LL0000033374	XLOC_009821	no Blast hit	no Blast hit	1	no	discard	single exon with low confidence or no Blast hit
chr16	18965240	18969258	+	LL0000033375	XLOC_009823	high confidence,XP_021324121.1,LOC110438157,uncharacterized LOC110438157	low confidence,NP_001311236.1,NMBR,neuromedin-B receptor isoform b precursor	1	no	keep	high/moderate confidence zebrafish BLAST hit
chr16	19742001	19743513	+	LL0000033376	XLOC_009832	low confidence,XP_021335606.1,LOC101886098,Fc receptor-like protein 5, transcript variant X5	no Blast hit	1	no	discard	single exon with low confidence or no Blast hit
chr16	21697402	21698740	+	LL0000033377	XLOC_009853	low confidence,NP_001074053.2,mavs,mitochondrial antiviral signaling protein, transcript variant 2	no Blast hit	1	no	discard	single exon with low confidence or no Blast hit
chr16	21747966	21751375	+	LL0000033378	XLOC_009855	no Blast hit	no Blast hit	1	no	discard	single exon with low confidence or no Blast hit
chr16	22120939	22122208	+	LL0000033379	XLOC_009861	high confidence,XP_017210988.1,LOC101886882,uncharacterized LOC101886882, transcript variant X1	moderate confidence,XP_016864593.1,TMEM161B,transmembrane protein 161B isoform X12	1	no	keep	high/moderate confidence zebrafish BLAST hit
chr16	22136471	22138364	+	LL0000033380	XLOC_009862	moderate confidence,XP_021322067.1,si:dkey-43b14.8,si:dkey-43b14.8	no Blast hit	1	no	keep	high/moderate confidence zebrafish BLAST hit
chr16	22156650	22159792	+	LL0000033381	XLOC_009863	low confidence,XP_021324770.1,si:dkey-29d5.2,si:dkey-29d5.2	no Blast hit	12	no	discard	identified as duplicate with existing V4.2/RefSeq annotation
chr16	23061665	23064169	+	LL0000033382	XLOC_009870	no Blast hit	no Blast hit	1	no	discard	single exon with low confidence or no Blast hit
chr16	23319843	23321080	+	LL0000033383	XLOC_009874	no Blast hit	no Blast hit	1	no	discard	single exon with low confidence or no Blast hit
chr16	24204434	24206156	+	LL0000033384	XLOC_009896	low confidence,NP_001035125.1,adora2ab,adenosine A2a receptor b	no Blast hit	1	no	discard	single exon with low confidence or no Blast hit
chr16	24206323	24210514	+	LL0000033385	XLOC_009897	low confidence,XP_021333783.1,si:ch211-165f21.7,si:ch211-165f21.7	no Blast hit	1	no	discard	single exon with low confidence or no Blast hit
chr16	24210618	24212110	+	LL0000033386	XLOC_009898	low confidence,XP_009303624.1,ccdc83,coiled-coil domain containing 83, transcript variant X2	low confidence,NP_658988.2,SMCR8,guanine nucleotide exchange protein SMCR8	1	no	discard	single exon with low confidence or no Blast hit
chr16	24574706	24575395	+	LL0000033387	XLOC_009901	low confidence,XP_005174680.2,LOC101882250,uncharacterized LOC101882250	low confidence,NP_006062.1,PKDREJ,polycystic kidney disease and receptor for egg jelly-related protein precursor	1	no	discard	single exon with low confidence or no Blast hit
chr16	24586889	24588219	+	LL0000033388	XLOC_009902	low confidence,XP_021324288.1,si:dkey-71h2.2,si:dkey-71h2.2, transcript variant X4	no Blast hit	1	no	discard	single exon with low confidence or no Blast hit
chr16	25047617	25048664	+	LL0000033389	XLOC_009916	low confidence,NP_001106978.1,il23r,interleukin 23 receptor	no Blast hit	1	no	discard	single exon with low confidence or no Blast hit
chr16	25049515	25051177	+	LL0000033390	XLOC_009917	moderate confidence,XP_021333659.1,LOC110439948,uncharacterized LOC110439948	no Blast hit	1	no	keep	high/moderate confidence zebrafish BLAST hit
chr16	25051297	25055951	+	LL0000033391	XLOC_009918	moderate confidence,XP_021335606.1,LOC101886098,Fc receptor-like protein 5, transcript variant X5	no Blast hit	1	no	keep	high/moderate confidence zebrafish BLAST hit
chr16	25057391	25058512	+	LL0000033392	XLOC_009919	high confidence,XP_003199161.1,LOC100535543,uncharacterized protein K02A2.6-like	no Blast hit	1	no	keep	high/moderate confidence zebrafish BLAST hit
chr16	25059149	25061519	+	LL0000033393	XLOC_009920	low confidence,NP_001106978.1,il23r,interleukin 23 receptor	no Blast hit	1	no	discard	single exon with low confidence or no Blast hit
chr16	25578389	25580118	+	LL0000033394	XLOC_009943	low confidence,NP_705944.1,epha4b,eph receptor A4b	no Blast hit	1	no	discard	single exon with low confidence or no Blast hit
chr16	25959415	25960836	+	LL0000033395	XLOC_009948	exact match,XP_021322591.1,LOC100333218,interferon-inducible GTPase 5-like, transcript variant X2	high confidence,XP_006723346.1,IRGC,interferon-inducible GTPase 5 isoform X2	1	no	keep	high confidence BLAST hit to human protein
chr16	26831382	26831454	+	LL0000033396	XLOC_009966	low confidence,NP_001093504.1,si:dkey-193c22.1,si:dkey-193c22.1	no Blast hit	1	no	discard	single exon with low confidence or no Blast hit
chr16	26832136	26838117	+	LL0000033397	XLOC_009967	high confidence,XP_005158094.1,zmp:0000001316,zmp:0000001316	high confidence,NP_741983.2,TRIM35,tripartite motif-containing protein 35 isoform 1	7	no	keep	high/moderate confidence zebrafish BLAST hit
chr16	27687540	27687861	+	LL0000033398	XLOC_009984	low confidence,XP_696283.4,kansl1b,KAT8 regulatory NSL complex subunit 1b, transcript variant X2	low confidence,XP_011513298.1,TJAP1,tight junction-associated protein 1 isoform X3	1	no	discard	single exon with low confidence or no Blast hit
chr16	29590054	29591084	+	LL0000033399	XLOC_010011	no Blast hit	no Blast hit	1	no	discard	single exon with low confidence or no Blast hit
chr16	29591316	29600490	+	LL0000033400	XLOC_010012	low confidence,NP_001025454.1,ldlra,low density lipoprotein receptor a	no Blast hit	2	no	keep	more than one exon
chr16	29600551	29604818	+	LL0000033401	XLOC_010013	low confidence,NP_001315129.1,si:dkey-77f5.3,si:dkey-77f5.3	no Blast hit	1	no	discard	single exon with low confidence or no Blast hit
chr16	29604981	29606035	+	LL0000033402	XLOC_010014	low confidence,XP_009289666.1,igsf10,immunoglobulin superfamily, member 10	no Blast hit	1	no	discard	single exon with low confidence or no Blast hit
chr16	29606191	29607494	+	LL0000033403	XLOC_010015	no Blast hit	no Blast hit	1	no	discard	single exon with low confidence or no Blast hit
chr16	29811713	29812866	+	LL0000033404	XLOC_010019	low confidence,XP_692034.2,tbc1d9,TBC1 domain family, member 9 (with GRAM domain)	no Blast hit	1	no	discard	single exon with low confidence or no Blast hit
chr16	31091184	31094104	+	LL0000033405	XLOC_010030	no Blast hit	no Blast hit	2	no	keep	more than one exon
chr16	31104180	31105224	+	LL0000033406	XLOC_010031	no Blast hit	no Blast hit	1	no	discard	single exon with low confidence or no Blast hit
chr16	31153944	31154825	+	LL0000033407	XLOC_010032	low confidence,XP_017206832.1,LOC103909784,uncharacterized LOC103909784, transcript variant X2	low confidence,NP_001092759.1,SH3RF3,E3 ubiquitin-protein ligase SH3RF3 precursor	1	no	discard	single exon with low confidence or no Blast hit
chr16	31154945	31160806	+	LL0000033408	XLOC_010033	high confidence,XP_021326730.1,LOC110438507,uncharacterized LOC110438507	low confidence,NP_002274.1,KRT85,keratin, type II cuticular Hb5 isoform 1	1	no	keep	high/moderate confidence zebrafish BLAST hit
chr16	34617022	34619037	+	LL0000033409	XLOC_010084	low confidence,XP_009289536.1,si:ch211-276i12.9,si:ch211-276i12.9	no Blast hit	1	no	discard	single exon with low confidence or no Blast hit
chr16	34620221	34621372	+	LL0000033410	XLOC_010085	low confidence,XP_021335150.1,slc4a5,solute carrier family 4 (sodium bicarbonate cotransporter), member 5, transcript variant X6	no Blast hit	1	no	discard	single exon with low confidence or no Blast hit
chr16	34778022	34784118	+	LL0000033411	XLOC_010087	low confidence,XP_021334698.1,LOC101882148,uncharacterized LOC101882148, transcript variant X5	no Blast hit	8	no	discard	identified as duplicate with existing V4.2/RefSeq annotation
chr16	35542416	35544143	+	LL0000033412	XLOC_010093	high confidence,XP_009289536.1,si:ch211-276i12.9,si:ch211-276i12.9	low confidence,NP_001335215.2,OR10J4,olfactory receptor 10J4	1	no	keep	high/moderate confidence zebrafish BLAST hit
chr16	35544937	35546781	+	LL0000033413	XLOC_010094	low confidence,NP_001038409.1,jtb,jumping translocation breakpoint	no Blast hit	1	no	discard	single exon with low confidence or no Blast hit
chr16	35656703	35658020	+	LL0000033414	XLOC_010096	no Blast hit	no Blast hit	1	no	discard	single exon with low confidence or no Blast hit
chr16	35778526	35780296	+	LL0000033415	XLOC_010099	low confidence,NP_001313334.1,cnbpb,CCHC-type zinc finger, nucleic acid binding protein b	low confidence,NP_001120664.1,CNBP,cellular nucleic acid-binding protein isoform 1	1	no	discard	single exon with low confidence or no Blast hit
chr16	35780550	35782285	+	LL0000033416	XLOC_010100	low confidence,XP_021336136.1,spag9b,sperm associated antigen 9b	no Blast hit	1	no	discard	single exon with low confidence or no Blast hit
chr16	36215135	36215594	+	LL0000033417	XLOC_010104	low confidence,NP_001038409.1,jtb,jumping translocation breakpoint	low confidence,XP_016882502.1,GPR108,protein GPR108 isoform X2	1	no	discard	single exon with low confidence or no Blast hit
chr16	36488046	36510757	+	LL0000033418	XLOC_010108	low confidence,XP_021326739.1,zgc:112970,zgc:112970, transcript variant X2	no Blast hit	10	no	discard	identified as duplicate with existing V4.2/RefSeq annotation
chr16	36510788	36524626	+	LL0000033419	XLOC_010109	low confidence,XP_021326739.1,zgc:112970,zgc:112970, transcript variant X2	no Blast hit	8	no	discard	identified as duplicate with existing V4.2/RefSeq annotation
chr16	38836918	38845808	+	LL0000033420	XLOC_010131	exact match,XP_021322660.1,LOC108179640,uncharacterized LOC108179640, transcript variant X1	low confidence,NP_057726.4,SPTBN5,spectrin beta chain, non-erythrocytic 5	3	no	keep	exact match BLAST hit with zebrafish protein
chr16	40941872	40944015	+	LL0000033421	XLOC_010155	no Blast hit	no Blast hit	5	no	discard	identified as duplicate with existing V4.2/RefSeq annotation
chr16	41140958	41143038	+	LL0000033422	XLOC_010161	high confidence,XP_021322455.1,LOC100535079,B-cell receptor CD22-like	low confidence,NP_998798.1,PSG4,pregnancy-specific beta-1-glycoprotein 4 isoform 2 precursor	3	no	keep	high/moderate confidence zebrafish BLAST hit
chr16	42565529	42567223	+	LL0000033423	XLOC_010184	low confidence,XP_005163751.1,wu:fd06e11,wu:fd06e11	no Blast hit	4	no	keep	more than one exon
chr16	44710840	44713203	+	LL0000033424	XLOC_010206	low confidence,NP_001003597.1,mnd1,meiotic nuclear divisions 1 homolog (S. cerevisiae)	no Blast hit	1	no	discard	single exon with low confidence or no Blast hit
chr16	44719677	44721024	+	LL0000033425	XLOC_010207	low confidence,NP_001121732.1,cdk14,cyclin-dependent kinase 14	no Blast hit	1	no	discard	single exon with low confidence or no Blast hit
chr16	46292994	46294164	+	LL0000033426	XLOC_010229	no Blast hit	low confidence,NP_001245305.1,EPS15L1,epidermal growth factor receptor substrate 15-like 1 isoform 4	1	no	discard	single exon with low confidence or no Blast hit
chr16	46717407	46720817	+	LL0000033427	XLOC_010240	low confidence,XP_021335606.1,LOC101886098,Fc receptor-like protein 5, transcript variant X5	no Blast hit	1	no	discard	single exon with low confidence or no Blast hit
chr16	46745775	46748049	+	LL0000033428	XLOC_010242	moderate confidence,NP_001106978.1,il23r,interleukin 23 receptor	low confidence,XP_016872334.1,FBH1,F-box DNA helicase 1 isoform X4	1	no	keep	high/moderate confidence zebrafish BLAST hit
chr16	47180462	47186609	+	LL0000033429	XLOC_010247	low confidence,XP_021325224.1,LOC103908669,uncharacterized LOC103908669	no Blast hit	2	no	keep	more than one exon
chr16	50261432	50262756	+	LL0000033430	XLOC_010273	no Blast hit	no Blast hit	1	no	discard	single exon with low confidence or no Blast hit
chr16	50262900	50265194	+	LL0000033431	XLOC_010274	low confidence,NP_001315129.1,si:dkey-77f5.3,si:dkey-77f5.3	no Blast hit	1	no	discard	single exon with low confidence or no Blast hit
chr16	50833653	50837668	+	LL0000033432	XLOC_010278	low confidence,NP_001003597.1,mnd1,meiotic nuclear divisions 1 homolog (S. cerevisiae)	no Blast hit	3	no	keep	more than one exon
chr16	50837825	50841195	+	LL0000033433	XLOC_010279	low confidence,NP_001038409.1,jtb,jumping translocation breakpoint	no Blast hit	1	no	discard	single exon with low confidence or no Blast hit
chr16	50841564	50842290	+	LL0000033434	XLOC_010280	low confidence,NP_001025454.1,ldlra,low density lipoprotein receptor a	no Blast hit	1	no	discard	single exon with low confidence or no Blast hit
chr16	50843789	50844756	+	LL0000033435	XLOC_010281	low confidence,XP_002661342.3,tecpr1b,tectonin beta-propeller repeat containing 1b, transcript variant X1	no Blast hit	1	no	discard	single exon with low confidence or no Blast hit
chr16	51214591	51217897	+	LL0000033436	XLOC_010286	moderate confidence,XP_021329466.1,gb:co360592,expressed sequence CO360592, transcript variant X2	no Blast hit	2	no	keep	high/moderate confidence zebrafish BLAST hit
chr16	51539749	51543228	+	LL0000033437	XLOC_010289	moderate confidence,NP_001025454.1,ldlra,low density lipoprotein receptor a	no Blast hit	1	no	keep	high/moderate confidence zebrafish BLAST hit
chr16	53078290	53079596	+	LL0000033438	XLOC_010309	low confidence,XP_009303419.1,rbm18,RNA binding motif protein 18, transcript variant X2	low confidence,NP_001004434.1,SLC30A2,zinc transporter 2 isoform 1	1	no	discard	single exon with low confidence or no Blast hit
chr16	53312784	53314351	+	LL0000033439	XLOC_010314	no Blast hit	low confidence,XP_016862820.1,IL17RC,interleukin-17 receptor C isoform X6	1	no	discard	single exon with low confidence or no Blast hit
chr16	54299994	54300849	+	LL0000033440	XLOC_010328	high confidence,XP_009289536.1,si:ch211-276i12.9,si:ch211-276i12.9	no Blast hit	1	no	keep	high/moderate confidence zebrafish BLAST hit
chr16	54383463	54387028	+	LL0000033441	XLOC_010331	no Blast hit	no Blast hit	2	no	keep	more than one exon
chr16	54542904	54544252	+	LL0000033442	XLOC_010334	low confidence,NP_001076410.1,zbed4,zinc finger, BED-type containing 4	low confidence,NP_001277188.1,PHF3,PHD finger protein 3 isoform 2	1	no	discard	single exon with low confidence or no Blast hit
chr16	54545168	54545847	+	LL0000033443	XLOC_010335	no Blast hit	no Blast hit	1	no	discard	single exon with low confidence or no Blast hit
chr16	54548223	54552064	+	LL0000033444	XLOC_010337	moderate confidence,NP_001106978.1,il23r,interleukin 23 receptor	low confidence,NP_001020.2,RPS26,40S ribosomal protein S26	1	no	keep	high/moderate confidence zebrafish BLAST hit
chr16	54991263	54993788	+	LL0000033445	XLOC_010350	low confidence,XP_021322738.1,LOC103909000,serine/threonine-protein kinase pim-2-like, transcript variant X2	low confidence,NP_001153879.1,TLCD1,TLC domain-containing protein 1 isoform 2	1	no	discard	single exon with low confidence or no Blast hit
chr16	337905	338148	-	LL0000033446	XLOC_010360	low confidence,XP_009291982.2,olfcg6,olfactory receptor C family, g6	low confidence,NP_001265121.1,GANAB,neutral alpha-glucosidase AB isoform 4	1	no	discard	single exon with low confidence or no Blast hit
chr16	2873696	2874804	-	LL0000033447	XLOC_010378	no Blast hit	no Blast hit	1	no	discard	single exon with low confidence or no Blast hit
chr16	2874977	2881118	-	LL0000033448	XLOC_010379	low confidence,NP_001025454.1,ldlra,low density lipoprotein receptor a	no Blast hit	3	no	keep	more than one exon
chr16	3097970	3100453	-	LL0000033449	XLOC_010382	no Blast hit	no Blast hit	1	no	discard	single exon with low confidence or no Blast hit
chr16	3456847	3458027	-	LL0000033450	XLOC_010385	no Blast hit	no Blast hit	1	no	discard	single exon with low confidence or no Blast hit
chr16	3458226	3460920	-	LL0000033451	XLOC_010386	no Blast hit	no Blast hit	1	no	discard	single exon with low confidence or no Blast hit
chr16	4560254	4561465	-	LL0000033452	XLOC_010397	low confidence,NP_997987.2,pik3r2,phosphoinositide-3-kinase, regulatory subunit 2 (beta)	no Blast hit	1	no	discard	single exon with low confidence or no Blast hit
chr16	6583000	6583878	-	LL0000033453	XLOC_010420	low confidence,NP_998078.2,foxd1,forkhead box D1	no Blast hit	1	no	discard	single exon with low confidence or no Blast hit
chr16	7952622	7954036	-	LL0000033454	XLOC_010435	moderate confidence,XP_021334096.1,si:ch211-261n11.8,si:ch211-261n11.8, transcript variant X1	low confidence,NP_004720.1,ZBED1,zinc finger BED domain-containing protein 1	1	no	keep	high/moderate confidence zebrafish BLAST hit
chr16	8347403	8348936	-	LL0000033455	XLOC_010443	no Blast hit	no Blast hit	1	no	discard	single exon with low confidence or no Blast hit
chr16	9008111	9009725	-	LL0000033456	XLOC_010448	low confidence,NP_001307081.1,LOC107197950,uncharacterized LOC107197950	no Blast hit	1	no	discard	single exon with low confidence or no Blast hit
chr16	9010246	9011127	-	LL0000033457	XLOC_010449	low confidence,XP_009292272.1,si:dkeyp-113d7.10,si:dkeyp-113d7.10, transcript variant X1	low confidence,XP_016869062.1,ENPP2,ectonucleotide pyrophosphatase/phosphodiesterase family member 2 isoform X6	1	no	discard	single exon with low confidence or no Blast hit
chr16	9701758	9702807	-	LL0000033458	XLOC_010457	high confidence,XP_021331149.1,LOC101882691,uncharacterized LOC101882691, transcript variant X2	no Blast hit	1	no	keep	high/moderate confidence zebrafish BLAST hit
chr16	9703066	9709951	-	LL0000033459	XLOC_010458	high confidence,XP_021322742.1,LOC100149966,uncharacterized LOC100149966	low confidence,XP_011517078.1,TRMO,tRNA (adenine(37)-N6)-methyltransferase isoform X2	11	no	keep	high/moderate confidence zebrafish BLAST hit
chr16	11814943	11815559	-	LL0000033460	XLOC_010480	low confidence,NP_001018591.1,oard1,O-acyl-ADP-ribose deacylase 1	low confidence,NP_001316625.1,OARD1,ADP-ribose glycohydrolase OARD1 isoform d	1	no	discard	single exon with low confidence or no Blast hit
chr16	12645978	12648961	-	LL0000033461	XLOC_010501	no Blast hit	no Blast hit	1	no	discard	single exon with low confidence or no Blast hit
chr16	12789286	12791415	-	LL0000033462	XLOC_010505	low confidence,XP_021331018.1,LOC110439387,gastrula zinc finger protein XlCGF28.1-like	no Blast hit	1	no	discard	single exon with low confidence or no Blast hit
chr16	13664325	13665891	-	LL0000033463	XLOC_010516	low confidence,XP_021323560.1,kifc3,kinesin family member C3, transcript variant X10	no Blast hit	1	no	discard	single exon with low confidence or no Blast hit
chr16	15751171	15752049	-	LL0000033464	XLOC_010541	low confidence,XP_021331692.1,thy1,Thy-1 cell surface antigen, transcript variant X1	no Blast hit	1	no	discard	single exon with low confidence or no Blast hit
chr16	15873834	15881394	-	LL0000033465	XLOC_010543	moderate confidence,XP_021332392.1,LOC110439838,uncharacterized LOC110439838	moderate confidence,XP_016863103.1,LOC105377641,endogenous retrovirus group PABLB member 1 Env polyprotein	2	no	keep	high/moderate confidence zebrafish BLAST hit
chr16	15833086	15836828	-	LL0000033466	XLOC_010544	high confidence,XP_009297510.1,LOC103910221,uncharacterized LOC103910221	no Blast hit	1	no	keep	high/moderate confidence zebrafish BLAST hit
chr16	15878139	15878712	-	LL0000033467	XLOC_010545	low confidence,XP_017210988.1,LOC101886882,uncharacterized LOC101886882, transcript variant X1	low confidence,XP_016869645.1,LOC105379356,uncharacterized protein LOC105379356 isoform X2	1	no	discard	single exon with low confidence or no Blast hit
chr16	15992850	15995101	-	LL0000033468	XLOC_010548	moderate confidence,XP_005155881.1,LOC101886897,zinc finger BED domain-containing protein 1-like	low confidence,NP_001167579.1,ZBED6,zinc finger BED domain-containing protein 6	1	no	keep	high/moderate confidence zebrafish BLAST hit
chr16	16199513	16203623	-	LL0000033469	XLOC_010552	no Blast hit	no Blast hit	1	no	discard	single exon with low confidence or no Blast hit
chr16	16348933	16351224	-	LL0000033470	XLOC_010558	no Blast hit	no Blast hit	1	no	discard	single exon with low confidence or no Blast hit
chr16	16351974	16352686	-	LL0000033471	XLOC_010559	no Blast hit	no Blast hit	1	no	discard	single exon with low confidence or no Blast hit
chr16	17750306	17754778	-	LL0000033472	XLOC_010588	low confidence,XP_021331061.1,LOC110439405,uncharacterized LOC110439405	low confidence,XP_016880909.1,NCOR1,nuclear receptor corepressor 1 isoform X17	1	no	discard	single exon with low confidence or no Blast hit
chr16	18132469	18132631	-	LL0000033473	XLOC_010589	low confidence,XP_005161607.1,LOC101882460,zinc finger protein 239-like, transcript variant X3	low confidence,XP_016870075.1,HMCN2,hemicentin-2 isoform X8	1	no	discard	single exon with low confidence or no Blast hit
chr16	18137601	18142123	-	LL0000033474	XLOC_010590	low confidence,XP_021327604.1,LOC110438777,uncharacterized LOC110438777, transcript variant X7	low confidence,XP_011523467.1,TOP2A,DNA topoisomerase 2-alpha isoform X2	3	no	discard	identified as duplicate with existing V4.2/RefSeq annotation
chr16	18170193	18170882	-	LL0000033475	XLOC_010592	low confidence,XP_689990.2,nuak1b,NUAK family, SNF1-like kinase, 1b, transcript variant X1	low confidence,NP_001092759.1,SH3RF3,E3 ubiquitin-protein ligase SH3RF3 precursor	2	no	keep	more than one exon
chr16	18360619	18361746	-	LL0000033476	XLOC_010593	moderate confidence,NP_001106978.1,il23r,interleukin 23 receptor	no Blast hit	1	no	keep	high/moderate confidence zebrafish BLAST hit
chr16	19464810	19465904	-	LL0000033477	XLOC_010604	low confidence,XP_021333568.1,si:dkey-222h21.4,si:dkey-222h21.4	no Blast hit	2	no	keep	more than one exon
chr16	20313953	20314471	-	LL0000033478	XLOC_010615	no Blast hit	no Blast hit	1	no	discard	single exon with low confidence or no Blast hit
chr16	20978927	20980937	-	LL0000033479	XLOC_010621	low confidence,XP_021330274.1,si:ch73-194h10.3,si:ch73-194h10.3	low confidence,NP_001273280.1,DACT2,dapper homolog 2 isoform c	1	no	discard	single exon with low confidence or no Blast hit
chr16	21888677	21889589	-	LL0000033480	XLOC_010642	no Blast hit	low confidence,NP_001356696.1,ZNF28,zinc finger protein 28 isoform 8	1	no	discard	single exon with low confidence or no Blast hit
chr16	22144595	22150323	-	LL0000033481	XLOC_010649	low confidence,XP_021333283.1,LOC110439898,uncharacterized LOC110439898	no Blast hit	3	no	keep	more than one exon
chr16	22254957	22255719	-	LL0000033482	XLOC_010653	low confidence,XP_009296628.1,LOC103909980,uncharacterized protein K02A2.6-like	low confidence,XP_016855989.1,DFFB,DNA fragmentation factor subunit beta isoform X3	1	no	discard	single exon with low confidence or no Blast hit
chr16	22387691	22396486	-	LL0000033483	XLOC_010658	exact match,XP_021322584.1,LOC101885445,uncharacterized LOC101885445, transcript variant X2	low confidence,NP_001013683.1,VSIG8,V-set and immunoglobulin domain-containing protein 8 precursor	10	no	discard	identified as duplicate with existing V4.2/RefSeq annotation
chr16	22430615	22432526	-	LL0000033484	XLOC_010659	no Blast hit	no Blast hit	2	no	discard	identified as duplicate with existing V4.2/RefSeq annotation
chr16	23573877	23575197	-	LL0000033485	XLOC_010680	high confidence,XP_021331039.1,LOC110439392,uncharacterized LOC110439392	no Blast hit	2	no	keep	high/moderate confidence zebrafish BLAST hit
chr16	25904162	25904860	-	LL0000033486	XLOC_010721	high confidence,XP_021331172.1,LOC108183685,uncharacterized LOC108183685, transcript variant X4	low confidence,NP_001157916.1,CBY3,protein chibby homolog 3	3	no	discard	identified as duplicate with existing V4.2/RefSeq annotation
chr16	25919791	25920425	-	LL0000033487	XLOC_010723	moderate confidence,XP_021325598.1,LOC103909664,uncharacterized LOC103909664	no Blast hit	1	no	keep	high/moderate confidence zebrafish BLAST hit
chr16	26317498	26321857	-	LL0000033488	XLOC_010731	high confidence,XP_021324313.1,ftr06,finTRIM family, member 6, transcript variant X1	low confidence,NP_056008.1,ARC,activity-regulated cytoskeleton-associated protein	6	no	keep	high/moderate confidence zebrafish BLAST hit
chr16	27584095	27584167	-	LL0000033489	XLOC_010756	low confidence,NP_001093504.1,si:dkey-193c22.1,si:dkey-193c22.1	no Blast hit	1	no	discard	single exon with low confidence or no Blast hit
chr16	27587914	27587986	-	LL0000033490	XLOC_010759	low confidence,NP_001093504.1,si:dkey-193c22.1,si:dkey-193c22.1	no Blast hit	1	no	discard	single exon with low confidence or no Blast hit
chr16	27588896	27591305	-	LL0000033491	XLOC_010761	no Blast hit	no Blast hit	1	no	discard	single exon with low confidence or no Blast hit
chr16	27750100	27751432	-	LL0000033492	XLOC_010767	low confidence,NP_001025454.1,ldlra,low density lipoprotein receptor a	low confidence,NP_001310951.1,TXNDC11,thioredoxin domain-containing protein 11 isoform 3	1	no	discard	single exon with low confidence or no Blast hit
chr16	27752177	27752758	-	LL0000033493	XLOC_010768	low confidence,NP_001297024.1,ednrab,endothelin receptor type Ab	no Blast hit	1	no	discard	single exon with low confidence or no Blast hit
chr16	27753102	27754057	-	LL0000033494	XLOC_010769	no Blast hit	no Blast hit	1	no	discard	single exon with low confidence or no Blast hit
chr16	27754237	27755739	-	LL0000033495	XLOC_010770	low confidence,XP_021335606.1,LOC101886098,Fc receptor-like protein 5, transcript variant X5	no Blast hit	1	no	discard	single exon with low confidence or no Blast hit
chr16	29531305	29533860	-	LL0000033496	XLOC_010791	no Blast hit	no Blast hit	1	no	discard	single exon with low confidence or no Blast hit
chr16	29919824	29923163	-	LL0000033497	XLOC_010795	low confidence,XP_021329186.1,LOC110439107,uncharacterized LOC110439107	no Blast hit	5	no	keep	more than one exon
chr16	30344977	30345525	-	LL0000033498	XLOC_010796	low confidence,NP_001007216.1,gpr34a,G protein-coupled receptor 34a	no Blast hit	1	no	discard	single exon with low confidence or no Blast hit
chr16	31370198	31370346	-	LL0000033499	XLOC_010811	low confidence,XP_021332507.1,atg4c,autophagy related 4C, cysteine peptidase, transcript variant X3	low confidence,XP_011530348.1,DCHS2,protocadherin-23 isoform X1	1	no	discard	single exon with low confidence or no Blast hit
chr16	33560849	33564809	-	LL0000033500	XLOC_010859	low confidence,XP_021333058.1,LOC101883618,uncharacterized protein PF11_0213-like	no Blast hit	1	no	discard	single exon with low confidence or no Blast hit
chr16	33991710	33991759	-	LL0000033501	XLOC_010865	low confidence,NP_956554.1,ppp4r1,protein phosphatase 4, regulatory subunit 1	low confidence,XP_011524077.1,PPP4R1,serine/threonine-protein phosphatase 4 regulatory subunit 1 isoform X1	1	no	discard	single exon with low confidence or no Blast hit
chr16	34009757	34011784	-	LL0000033502	XLOC_010866	low confidence,XP_003198845.1,si:ch73-194h10.3,si:ch73-194h10.3	no Blast hit	1	no	discard	single exon with low confidence or no Blast hit
chr16	34831699	34832679	-	LL0000033503	XLOC_010874	no Blast hit	no Blast hit	1	no	discard	single exon with low confidence or no Blast hit
chr16	34833527	34836445	-	LL0000033504	XLOC_010875	moderate confidence,XP_021335606.1,LOC101886098,Fc receptor-like protein 5, transcript variant X5	no Blast hit	1	no	keep	high/moderate confidence zebrafish BLAST hit
chr16	34852925	34853892	-	LL0000033505	XLOC_010876	low confidence,NP_001139082.1,tmem176,transmembrane protein 176	low confidence,XP_011526293.1,JAK3,tyrosine-protein kinase JAK3 isoform X3	1	no	discard	single exon with low confidence or no Blast hit
chr16	36030493	36032236	-	LL0000033506	XLOC_010886	no Blast hit	no Blast hit	1	no	discard	single exon with low confidence or no Blast hit
chr16	36311422	36311937	-	LL0000033507	XLOC_010891	low confidence,NP_001074153.1,vhl,von Hippel-Lindau tumor suppressor	low confidence,XP_006723905.1,RBL1,retinoblastoma-like protein 1 isoform X4	1	no	discard	single exon with low confidence or no Blast hit
chr16	36307959	36308206	-	LL0000033508	XLOC_010892	low confidence,XP_021331061.1,LOC110439405,uncharacterized LOC110439405	no Blast hit	1	no	discard	single exon with low confidence or no Blast hit
chr16	36308526	36308883	-	LL0000033509	XLOC_010893	no Blast hit	no Blast hit	1	no	discard	single exon with low confidence or no Blast hit
chr16	36308939	36309804	-	LL0000033510	XLOC_010894	low confidence,NP_001070745.3,setdb1b,SET domain, bifurcated 1b	no Blast hit	1	no	discard	single exon with low confidence or no Blast hit
chr16	36309880	36310102	-	LL0000033511	XLOC_010895	no Blast hit	no Blast hit	1	no	discard	single exon with low confidence or no Blast hit
chr16	36310161	36310543	-	LL0000033512	XLOC_010896	low confidence,NP_001108062.1,rbm15b,RNA binding motif protein 15B	no Blast hit	1	no	discard	single exon with low confidence or no Blast hit
chr16	36401081	36424086	-	LL0000033513	XLOC_010897	matches or overlaps with known lincRNA	no Blast hit	7	yes	keep	maps to previously identified lincRNA
chr16	36453669	36455652	-	LL0000033514	XLOC_010898	no Blast hit	no Blast hit	2	no	keep	more than one exon
chr16	36462507	36466078	-	LL0000033515	XLOC_010899	high confidence,XP_021327275.1,LOC103908724,uncharacterized LOC103908724	low confidence,XP_024302798.1,LOC112267992,uncharacterized protein LOC112267992	1	no	keep	high/moderate confidence zebrafish BLAST hit
chr16	36595419	36596276	-	LL0000033516	XLOC_010908	high confidence,NP_997830.1,dnaja2l,DnaJ (Hsp40) homolog, subfamily A, member 2, like	high confidence,NP_005871.1,DNAJA2,dnaJ homolog subfamily A member 2	1	no	keep	high/moderate confidence zebrafish BLAST hit
chr16	36650475	36650674	-	LL0000033517	XLOC_010910	low confidence,NP_001138287.1,slc38a8a,solute carrier family 38, member 8a	low confidence,XP_024305227.1,TRAF5,TNF receptor-associated factor 5 isoform X4	1	no	discard	single exon with low confidence or no Blast hit
chr16	36970346	36971876	-	LL0000033518	XLOC_010917	no Blast hit	low confidence,NP_775804.2,TDRD5,tudor domain-containing protein 5 isoform 2	1	no	discard	single exon with low confidence or no Blast hit
chr16	38411934	38414208	-	LL0000033519	XLOC_010924	no Blast hit	low confidence,XP_016877371.1,CHRNA7,neuronal acetylcholine receptor subunit alpha-7 isoform X2	1	no	discard	single exon with low confidence or no Blast hit
chr16	40418140	40423140	-	LL0000033520	XLOC_010946	low confidence,XP_021328859.1,grid1a,glutamate receptor, ionotropic, delta 1a, transcript variant X4	no Blast hit	1	no	discard	single exon with low confidence or no Blast hit
chr16	41537932	41539393	-	LL0000033521	XLOC_010963	no Blast hit	no Blast hit	1	no	discard	single exon with low confidence or no Blast hit
chr16	41790914	41791913	-	LL0000033522	XLOC_010969	low confidence,NP_001038409.1,jtb,jumping translocation breakpoint	no Blast hit	1	no	discard	single exon with low confidence or no Blast hit
chr16	43041515	43042881	-	LL0000033523	XLOC_011003	no Blast hit	no Blast hit	1	no	discard	single exon with low confidence or no Blast hit
chr16	43073409	43077161	-	LL0000033524	XLOC_011005	no Blast hit	no Blast hit	4	no	discard	identified as duplicate with existing V4.2/RefSeq annotation
chr16	44724422	44733864	-	LL0000033525	XLOC_011020	high confidence,XP_017206900.1,LOC101886755,serine/threonine-protein kinase pim-2-like	moderate confidence,NP_055655.1,NUAK1,NUAK family SNF1-like kinase 1	8	no	keep	high/moderate confidence zebrafish BLAST hit
chr16	45008377	45010157	-	LL0000033526	XLOC_011026	low confidence,XP_009291138.1,il17a/f2,interleukin 17a/f2, transcript variant X1	no Blast hit	1	no	discard	single exon with low confidence or no Blast hit
chr16	46796439	46798451	-	LL0000033527	XLOC_011066	low confidence,NP_001002514.1,dusp22a,dual specificity phosphatase 22a	no Blast hit	4	no	keep	more than one exon
chr16	47522557	47524991	-	LL0000033528	XLOC_011076	low confidence,XP_017209945.1,usp15,ubiquitin specific peptidase 15	low confidence,NP_694995.2,ZNF549,zinc finger protein 549 isoform 2	1	no	discard	single exon with low confidence or no Blast hit
chr16	47525912	47528607	-	LL0000033529	XLOC_011077	no Blast hit	no Blast hit	1	no	discard	single exon with low confidence or no Blast hit
chr16	48601202	48601756	-	LL0000033530	XLOC_011082	low confidence,XP_021333058.1,LOC101883618,uncharacterized protein PF11_0213-like	low confidence,NP_001005281.1,OR6B1,olfactory receptor 6B1	1	no	discard	single exon with low confidence or no Blast hit
chr16	48767422	48780563	-	LL0000033531	XLOC_011085	high confidence,XP_009289536.1,si:ch211-276i12.9,si:ch211-276i12.9	no Blast hit	1	no	keep	high/moderate confidence zebrafish BLAST hit
chr16	49911247	49915597	-	LL0000033532	XLOC_011092	high confidence,XP_021332670.1,LOC110439859,uncharacterized LOC110439859	moderate confidence,NP_001128360.1,RTL1,retrotransposon-like protein 1	1	no	keep	high/moderate confidence zebrafish BLAST hit
chr16	49916533	49918023	-	LL0000033533	XLOC_011093	low confidence,XP_009305077.2,si:ch211-277e21.2,si:ch211-277e21.2, transcript variant X3	no Blast hit	1	no	discard	single exon with low confidence or no Blast hit
chr16	50923062	50924384	-	LL0000033534	XLOC_011103	no Blast hit	no Blast hit	1	no	discard	single exon with low confidence or no Blast hit
chr16	50986993	51001059	-	LL0000033535	XLOC_011107	low confidence,NP_001268902.1,si:ch73-311h14.2,si:ch73-311h14.2	no Blast hit	2	no	keep	more than one exon
chr16	51897771	51932428	-	LL0000033536	XLOC_011119	high confidence,XP_009290988.1,sec16a,SEC16 homolog A, endoplasmic reticulum export factor, transcript variant X3	high confidence,XP_011517563.1,SEC16A,protein transport protein Sec16A isoform X14	17	no	keep	high/moderate confidence zebrafish BLAST hit
chr16	52426732	52430105	-	LL0000033537	XLOC_011121	low confidence,XP_001344635.2,LOC100005637,uncharacterized LOC100005637	low confidence,XP_016867853.1,RNF216,E3 ubiquitin-protein ligase RNF216 isoform X3	5	no	keep	more than one exon
chr16	52780288	52784817	-	LL0000033538	XLOC_011126	low confidence,XP_021330692.1,pfkfb3,6-phosphofructo-2-kinase/fructose-2,6-biphosphatase 3, transcript variant X3	no Blast hit	2	no	keep	more than one exon
chr16	53165204	53182909	-	LL0000033539	XLOC_011131	high confidence,XP_009294625.2,LOC100331776,uncharacterized LOC100331776, transcript variant X2	low confidence,NP_001307302.1,VWA5B2,von Willebrand factor A domain-containing protein 5B2 isoform 2	13	no	discard	identified as duplicate with existing V4.2/RefSeq annotation
chr16	53545988	53546269	-	LL0000033540	XLOC_011133	moderate confidence,XP_021328715.1,LOC110439017,uncharacterized LOC110439017	no Blast hit	1	no	keep	high/moderate confidence zebrafish BLAST hit
chr16	53922158	53925086	-	LL0000033541	XLOC_011140	no Blast hit	no Blast hit	1	no	discard	single exon with low confidence or no Blast hit
chr16	53925286	53925668	-	LL0000033542	XLOC_011141	no Blast hit	no Blast hit	1	no	discard	single exon with low confidence or no Blast hit
chr16	54498827	54508890	-	LL0000033543	XLOC_011153	high confidence,XP_021322460.1,creb3l4,cAMP responsive element binding protein 3-like 4	moderate confidence,XP_016855861.1,CREB3L4,cyclic AMP-responsive element-binding protein 3-like protein 4 isoform X2	6	no	keep	high/moderate confidence zebrafish BLAST hit
chr16	54687227	54690011	-	LL0000033544	XLOC_011156	high confidence,XP_017207073.2,nipal2,NIPA like domain containing 2	high confidence,NP_001308564.1,NIPAL2,NIPA-like protein 2 isoform a	4	no	keep	high/moderate confidence zebrafish BLAST hit
chr16	54708146	54740110	-	LL0000033545	XLOC_011157	exact match,XP_021322736.1,LOC101882472,immunoglobulin superfamily DCC subclass member 3, transcript variant X2	high confidence,NP_004875.2,IGDCC3,immunoglobulin superfamily DCC subclass member 3 precursor	18	no	discard	identified as duplicate with existing V4.2/RefSeq annotation
chr16	54801316	54803315	-	LL0000033546	XLOC_011160	low confidence,XP_021325075.1,znf1157,zinc finger protein 1157, transcript variant X4	low confidence,NP_000081.1,COL3A1,collagen alpha-1(III) chain preproprotein	4	no	keep	more than one exon
chr17	51559	51891	+	LL0000033547	XLOC_011185	low confidence,XP_021327917.1,LOC100332822,mucin-5AC, transcript variant X3	no Blast hit	1	no	discard	single exon with low confidence or no Blast hit
chr17	140097	141037	+	LL0000033548	XLOC_011190	high confidence,NP_001082949.1,klhdc2,kelch domain containing 2	moderate confidence,XP_011534912.1,KLHDC2,kelch domain-containing protein 2 isoform X2	2	no	keep	high/moderate confidence zebrafish BLAST hit
chr17	242718	242845	+	LL0000033549	XLOC_011191	low confidence,XP_021323082.1,fas,Fas cell surface death receptor, transcript variant X1	no Blast hit	1	no	discard	single exon with low confidence or no Blast hit
chr17	486633	487423	+	LL0000033550	XLOC_011198	no Blast hit	no Blast hit	1	no	discard	single exon with low confidence or no Blast hit
chr17	825202	826706	+	LL0000033551	XLOC_011207	low confidence,XP_001344871.5,ppp2r5ca,protein phosphatase 2, regulatory subunit B', gamma a	low confidence,NP_848702.1,PPP2R5C,serine/threonine-protein phosphatase 2A 56 kDa regulatory subunit gamma isoform isoform c	1	no	discard	single exon with low confidence or no Blast hit
chr17	853595	855036	+	LL0000033552	XLOC_011209	no Blast hit	no Blast hit	1	no	discard	single exon with low confidence or no Blast hit
chr17	855183	855696	+	LL0000033553	XLOC_011210	low confidence,NP_001005301.1,osgepl1,O-sialoglycoprotein endopeptidase-like 1	no Blast hit	1	no	discard	single exon with low confidence or no Blast hit
chr17	868539	870612	+	LL0000033554	XLOC_011211	low confidence,XP_005164392.1,rhbdf1a,rhomboid 5 homolog 1a (Drosophila), transcript variant X1	no Blast hit	5	no	keep	more than one exon
chr17	870717	871007	+	LL0000033555	XLOC_011212	low confidence,NP_001274011.1,tmem69,transmembrane protein 69	low confidence,XP_016874275.1,LRRK2,leucine-rich repeat serine/threonine-protein kinase 2 isoform X5	1	no	discard	single exon with low confidence or no Blast hit
chr17	1295290	1316441	+	LL0000033556	XLOC_011218	matches or overlaps with known lincRNA	low confidence,NP_001026884.3,INF2,inverted formin-2 isoform 2	6	yes	keep	maps to previously identified lincRNA
chr17	2274784	2275591	+	LL0000033557	XLOC_011229	low confidence,XP_009293021.1,olfml2ba,olfactomedin-like 2Ba, transcript variant X2	no Blast hit	1	no	discard	single exon with low confidence or no Blast hit
chr17	2291387	2293674	+	LL0000033558	XLOC_011230	no Blast hit	no Blast hit	1	no	discard	single exon with low confidence or no Blast hit
chr17	2434004	2436384	+	LL0000033559	XLOC_011232	low confidence,NP_777285.1,ruvbl2,RuvB-like AAA ATPase 2	no Blast hit	1	no	discard	single exon with low confidence or no Blast hit
chr17	4020561	4023928	+	LL0000033560	XLOC_011242	no Blast hit	no Blast hit	1	no	discard	single exon with low confidence or no Blast hit
chr17	4112591	4112874	+	LL0000033561	XLOC_011244	low confidence,XP_021331409.1,LOC110437826,uncharacterized LOC110437826, transcript variant X2	no Blast hit	1	no	discard	single exon with low confidence or no Blast hit
chr17	4455451	4455639	+	LL0000033562	XLOC_011251	low confidence,XP_021331278.1,tsc2,tuberous sclerosis 2, transcript variant X4	low confidence,NP_002523.2,NUP88,nuclear pore complex protein Nup88 isoform 2	1	no	discard	single exon with low confidence or no Blast hit
chr17	4867158	4868190	+	LL0000033563	XLOC_011255	low confidence,NP_001121732.1,cdk14,cyclin-dependent kinase 14	low confidence,NP_775815.2,FAM129C,protein Niban 3 isoform a	1	no	discard	single exon with low confidence or no Blast hit
chr17	4868375	4869970	+	LL0000033564	XLOC_011256	low confidence,XP_021334325.1,lmo7a,LIM domain 7a, transcript variant X1	no Blast hit	1	no	discard	single exon with low confidence or no Blast hit
chr17	4997278	4997467	+	LL0000033565	XLOC_011259	low confidence,XP_005160693.1,wtap,WT1 associated protein, transcript variant X2	low confidence,XP_024307561.1,TECR,very-long-chain enoyl-CoA reductase isoform X4	1	no	discard	single exon with low confidence or no Blast hit
chr17	5520528	5521953	+	LL0000033566	XLOC_011262	low confidence,XP_009291047.1,bdkrb2,bradykinin receptor B2	no Blast hit	1	no	discard	single exon with low confidence or no Blast hit
chr17	5522941	5524694	+	LL0000033567	XLOC_011263	no Blast hit	no Blast hit	1	no	discard	single exon with low confidence or no Blast hit
chr17	5524813	5526865	+	LL0000033568	XLOC_011264	low confidence,XP_021328838.1,LOC110438041,uncharacterized LOC110438041	no Blast hit	1	no	discard	single exon with low confidence or no Blast hit
chr17	5632054	5635926	+	LL0000033569	XLOC_011266	low confidence,XP_001344635.2,LOC100005637,uncharacterized LOC100005637	no Blast hit	5	no	keep	more than one exon
chr17	5636820	5638055	+	LL0000033570	XLOC_011267	no Blast hit	low confidence,XP_011541094.1,GRM5,metabotropic glutamate receptor 5 isoform X1	1	no	discard	single exon with low confidence or no Blast hit
chr17	5957492	5958579	+	LL0000033571	XLOC_011272	moderate confidence,NP_001025454.1,ldlra,low density lipoprotein receptor a	low confidence,XP_016868707.1,MAPK15,mitogen-activated protein kinase 15 isoform X4	1	no	keep	high/moderate confidence zebrafish BLAST hit
chr17	7593080	7594654	+	LL0000033572	XLOC_011293	no Blast hit	no Blast hit	1	no	discard	single exon with low confidence or no Blast hit
chr17	7718367	7718449	+	LL0000033573	XLOC_011299	low confidence,NP_001014353.1,armt1,acidic residue methyltransferase 1	low confidence,NP_997464.2,DUOXA2,dual oxidase maturation factor 2	1	no	discard	single exon with low confidence or no Blast hit
chr17	7721423	7721505	+	LL0000033574	XLOC_011300	low confidence,NP_001107893.1,zgc:174160,zgc:174160	low confidence,XP_011517112.1,EXD3,exonuclease mut-7 homolog isoform X2	1	no	discard	single exon with low confidence or no Blast hit
chr17	8492419	8494524	+	LL0000033575	XLOC_011314	low confidence,XP_021326182.1,ano10b,anoctamin 10b, transcript variant X1	no Blast hit	1	no	discard	single exon with low confidence or no Blast hit
chr17	10907856	10907938	+	LL0000033576	XLOC_011334	low confidence,NP_001107893.1,zgc:174160,zgc:174160	low confidence,NP_002413.1,MMP3,stromelysin-1 preproprotein	1	no	discard	single exon with low confidence or no Blast hit
chr17	10915881	10915963	+	LL0000033577	XLOC_011337	low confidence,NP_001107893.1,zgc:174160,zgc:174160	no Blast hit	1	no	discard	single exon with low confidence or no Blast hit
chr17	13117862	13117944	+	LL0000033578	XLOC_011367	low confidence,NP_001107893.1,zgc:174160,zgc:174160	no Blast hit	1	no	discard	single exon with low confidence or no Blast hit
chr17	17858270	17860479	+	LL0000033579	XLOC_011405	no Blast hit	no Blast hit	1	no	discard	single exon with low confidence or no Blast hit
chr17	18933307	18934346	+	LL0000033580	XLOC_011414	moderate confidence,XP_021330393.1,LOC110439299,uncharacterized LOC110439299, transcript variant X3	no Blast hit	1	no	keep	high/moderate confidence zebrafish BLAST hit
chr17	18934470	18935199	+	LL0000033581	XLOC_011415	high confidence,XP_021336582.1,LOC103912040,uncharacterized LOC103912040	no Blast hit	1	no	keep	high/moderate confidence zebrafish BLAST hit
chr17	18936098	18936833	+	LL0000033582	XLOC_011416	high confidence,XP_021323977.1,LOC110438141,uncharacterized LOC110438141	low confidence,XP_024303002.1,C8orf33,UPF0488 protein C8orf33 isoform X1	1	no	keep	high/moderate confidence zebrafish BLAST hit
chr17	18937719	18940685	+	LL0000033583	XLOC_011417	high confidence,XP_021331336.1,LOC101886601,uncharacterized LOC101886601, transcript variant X2	high confidence,XP_016865088.1,GIN1,gypsy retrotransposon integrase-like protein 1 isoform X1	1	no	keep	high/moderate confidence zebrafish BLAST hit
chr17	22070006	22070457	+	LL0000033584	XLOC_011450	low confidence,XP_021323631.1,LOC108179987,uncharacterized LOC108179987	high confidence,XP_024308519.1,SMIM37,mitoregulin isoform X1	2	no	keep	high confidence BLAST hit to human protein
chr17	23402941	23404188	+	LL0000033585	XLOC_011477	no Blast hit	no Blast hit	3	no	discard	identified as duplicate with existing V4.2/RefSeq annotation
chr17	24086986	24091159	+	LL0000033586	XLOC_011522	moderate confidence,NP_001106978.1,il23r,interleukin 23 receptor	no Blast hit	1	no	keep	high/moderate confidence zebrafish BLAST hit
chr17	25283106	25283528	+	LL0000033587	XLOC_011551	low confidence,XP_005160060.1,clgn,calmegin, transcript variant X1	no Blast hit	1	no	discard	single exon with low confidence or no Blast hit
chr17	25768831	25769950	+	LL0000033588	XLOC_011562	low confidence,XP_017212655.1,LOC100332770,sodium/potassium/calcium exchanger 2-like	no Blast hit	1	no	discard	single exon with low confidence or no Blast hit
chr17	28147108	28147698	+	LL0000033589	XLOC_011587	low confidence,XP_021333628.1,LOC110439944,uncharacterized LOC110439944	no Blast hit	1	no	discard	single exon with low confidence or no Blast hit
chr17	29909728	29913790	+	LL0000033590	XLOC_011600	low confidence,NP_001076334.1,si:ch211-262h13.3,si:ch211-262h13.3	no Blast hit	4	no	keep	more than one exon
chr17	30823115	30829251	+	LL0000033591	XLOC_011609	low confidence,NP_001038409.1,jtb,jumping translocation breakpoint	no Blast hit	3	no	keep	more than one exon
chr17	30819984	30821399	+	LL0000033592	XLOC_011610	low confidence,XP_021331407.1,LOC108184001,zinc finger protein 850-like	low confidence,NP_775970.2,MAGEB18,melanoma-associated antigen B18	1	no	discard	single exon with low confidence or no Blast hit
chr17	31122440	31124228	+	LL0000033593	XLOC_011613	low confidence,NP_001038409.1,jtb,jumping translocation breakpoint	no Blast hit	3	no	discard	identified as duplicate with existing V4.2/RefSeq annotation
chr17	32337137	32338831	+	LL0000033594	XLOC_011630	low confidence,XP_009302357.2,LOC100534673,protein unc-13 homolog A-like, transcript variant X1	no Blast hit	1	no	discard	single exon with low confidence or no Blast hit
chr17	34257305	34258598	+	LL0000033595	XLOC_011659	low confidence,XP_017207364.1,si:dkey-3h2.3,si:dkey-3h2.3	no Blast hit	1	no	discard	single exon with low confidence or no Blast hit
chr17	34279940	34282287	+	LL0000033596	XLOC_011660	no Blast hit	no Blast hit	1	no	discard	single exon with low confidence or no Blast hit
chr17	34658398	34659355	+	LL0000033597	XLOC_011661	no Blast hit	no Blast hit	1	no	discard	single exon with low confidence or no Blast hit
chr17	36550958	36553645	+	LL0000033598	XLOC_011673	moderate confidence,NP_001164503.1,si:rp71-36n21.1,si:rp71-36n21.1	low confidence,XP_016856297.1,ZCCHC11,terminal uridylyltransferase 4 isoform X15	1	no	keep	high/moderate confidence zebrafish BLAST hit
chr17	37652123	37653696	+	LL0000033599	XLOC_011687	moderate confidence,XP_021335606.1,LOC101886098,Fc receptor-like protein 5, transcript variant X5	no Blast hit	1	no	keep	high/moderate confidence zebrafish BLAST hit
chr17	40052985	40055981	+	LL0000033600	XLOC_011708	high confidence,XP_021331039.1,LOC110439392,uncharacterized LOC110439392	no Blast hit	1	no	keep	high/moderate confidence zebrafish BLAST hit
chr17	40417996	40423912	+	LL0000033601	XLOC_011709	low confidence,NP_001018332.1,zgc:113057,zgc:113057	no Blast hit	2	no	keep	more than one exon
chr17	42284382	42286921	+	LL0000033602	XLOC_011723	low confidence,XP_009297370.1,LOC794452,uncharacterized LOC794452, transcript variant X5	no Blast hit	2	no	keep	more than one exon
chr17	43643297	43645902	+	LL0000033603	XLOC_011733	no Blast hit	low confidence,NP_001358510.1,DBNDD1,dysbindin domain-containing protein 1 isoform 5	1	no	discard	single exon with low confidence or no Blast hit
chr17	43646087	43647787	+	LL0000033604	XLOC_011734	no Blast hit	no Blast hit	1	no	discard	single exon with low confidence or no Blast hit
chr17	43647901	43649435	+	LL0000033605	XLOC_011735	no Blast hit	no Blast hit	1	no	discard	single exon with low confidence or no Blast hit
chr17	43769509	43771549	+	LL0000033606	XLOC_011738	low confidence,XP_017210666.2,LOC101884638,sterile alpha motif domain-containing protein 3-like	no Blast hit	4	no	keep	more than one exon
chr17	44015675	44016711	+	LL0000033607	XLOC_011744	no Blast hit	low confidence,XP_016862157.1,SIDT1,SID1 transmembrane family member 1 isoform X7	1	no	discard	single exon with low confidence or no Blast hit
chr17	44017269	44018539	+	LL0000033608	XLOC_011745	low confidence,NP_956462.1,nelfb,negative elongation factor complex member B	no Blast hit	1	no	discard	single exon with low confidence or no Blast hit
chr17	44020698	44022356	+	LL0000033609	XLOC_011746	low confidence,XP_021335606.1,LOC101886098,Fc receptor-like protein 5, transcript variant X5	no Blast hit	1	no	discard	single exon with low confidence or no Blast hit
chr17	44256327	44256690	+	LL0000033610	XLOC_011750	no Blast hit	no Blast hit	1	no	discard	single exon with low confidence or no Blast hit
chr17	44492255	44492785	+	LL0000033611	XLOC_011754	low confidence,XP_021323131.1,LOC110438047,uncharacterized LOC110438047	no Blast hit	1	no	discard	single exon with low confidence or no Blast hit
chr17	46157664	46158492	+	LL0000033612	XLOC_011780	low confidence,XP_005163385.1,abca4b,ATP-binding cassette, sub-family A (ABC1), member 4b, transcript variant X2	no Blast hit	2	no	keep	more than one exon
chr17	48895805	48896376	+	LL0000033613	XLOC_011800	low confidence,XP_001344116.1,si:dkey-63b1.1,si:dkey-63b1.1	no Blast hit	1	no	discard	single exon with low confidence or no Blast hit
chr17	48896545	48902251	+	LL0000033614	XLOC_011801	no Blast hit	no Blast hit	1	no	discard	single exon with low confidence or no Blast hit
chr17	49028310	49030304	+	LL0000033615	XLOC_011804	no Blast hit	no Blast hit	1	no	discard	single exon with low confidence or no Blast hit
chr17	49644594	49646554	+	LL0000033616	XLOC_011815	no Blast hit	no Blast hit	1	no	discard	single exon with low confidence or no Blast hit
chr17	49646648	49647256	+	LL0000033617	XLOC_011816	low confidence,NP_571847.2,cldn11b,claudin 11b	no Blast hit	1	no	discard	single exon with low confidence or no Blast hit
chr17	50648194	50648349	+	LL0000033618	XLOC_011825	low confidence,XP_021333058.1,LOC101883618,uncharacterized protein PF11_0213-like	low confidence,XP_011537753.1,TMEM26,transmembrane protein 26 isoform X3	1	no	discard	single exon with low confidence or no Blast hit
chr17	50844314	50846004	+	LL0000033619	XLOC_011829	no Blast hit	no Blast hit	1	no	discard	single exon with low confidence or no Blast hit
chr17	50955618	50956105	+	LL0000033620	XLOC_011830	no Blast hit	no Blast hit	2	no	keep	more than one exon
chr17	50983134	50984424	+	LL0000033621	XLOC_011831	low confidence,XP_021333058.1,LOC101883618,uncharacterized protein PF11_0213-like	no Blast hit	1	no	discard	single exon with low confidence or no Blast hit
chr17	51614880	51618363	+	LL0000033622	XLOC_011835	low confidence,NP_001003597.1,mnd1,meiotic nuclear divisions 1 homolog (S. cerevisiae)	low confidence,NP_001192273.1,CEACAM1,carcinoembryonic antigen-related cell adhesion molecule 1 isoform 6 precursor	2	no	keep	more than one exon
chr17	51795907	51796535	+	LL0000033623	XLOC_011840	no Blast hit	no Blast hit	1	no	discard	single exon with low confidence or no Blast hit
chr17	52095112	52151139	+	LL0000033624	XLOC_011844	high confidence,XP_005173640.2,ift43,intraflagellar transport 43	low confidence,NP_001096034.1,IFT43,intraflagellar transport protein 43 homolog isoform 2	6	no	keep	high/moderate confidence zebrafish BLAST hit
chr17	52253221	52255538	+	LL0000033625	XLOC_011845	low confidence,XP_017208200.1,adgrg11,adhesion G protein-coupled receptor G11, transcript variant X1	no Blast hit	1	no	discard	single exon with low confidence or no Blast hit
chr17	52659290	52660192	+	LL0000033626	XLOC_011849	low confidence,NP_001277277.1,kcnk1b,potassium channel, subfamily K, member 1b, transcript variant 1	no Blast hit	1	no	discard	single exon with low confidence or no Blast hit
chr17	52789630	52790962	+	LL0000033627	XLOC_011850	matches or overlaps with known lincRNA	no Blast hit	1	yes	keep	maps to previously identified lincRNA
chr17	52923289	52926055	+	LL0000033628	XLOC_011853	low confidence,NP_001106978.1,il23r,interleukin 23 receptor	no Blast hit	1	no	discard	single exon with low confidence or no Blast hit
chr17	52926396	52927295	+	LL0000033629	XLOC_011854	low confidence,NP_001025454.1,ldlra,low density lipoprotein receptor a	no Blast hit	1	no	discard	single exon with low confidence or no Blast hit
chr17	52927429	52928518	+	LL0000033630	XLOC_011855	low confidence,NP_957065.1,dctpp1,dCTP pyrophosphatase 1	no Blast hit	1	no	discard	single exon with low confidence or no Blast hit
chr17	52930157	52931441	+	LL0000033631	XLOC_011856	low confidence,NP_001038850.2,gck,glucokinase (hexokinase 4)	no Blast hit	1	no	discard	single exon with low confidence or no Blast hit
chr17	53153285	53153655	+	LL0000033632	XLOC_011857	low confidence,NP_001121836.1,qsox1,quiescin Q6 sulfhydryl oxidase 1	no Blast hit	1	no	discard	single exon with low confidence or no Blast hit
chr17	53214111	53214331	+	LL0000033633	XLOC_011859	low confidence,NP_944594.1,pepd,peptidase D	low confidence,NP_001159529.1,PEPD,xaa-Pro dipeptidase isoform 3	1	no	discard	single exon with low confidence or no Blast hit
chr17	53260498	53265926	+	LL0000033634	XLOC_011861	low confidence,XP_021335606.1,LOC101886098,Fc receptor-like protein 5, transcript variant X5	no Blast hit	3	no	keep	more than one exon
chr17	53367099	53373075	+	LL0000033635	XLOC_011868	exact match,XP_021323189.1,wu:fe17e08,wu:fe17e08	high confidence,XP_005259469.1,ZNF235,zinc finger protein 235 isoform X1	3	no	keep	high confidence BLAST hit to human protein
chr17	53375412	53379341	+	LL0000033636	XLOC_011869	low confidence,XP_021326442.1,LOC101887189,uncharacterized LOC101887189	no Blast hit	1	no	discard	single exon with low confidence or no Blast hit
chr17	53383510	53383774	+	LL0000033637	XLOC_011871	low confidence,XP_005161423.1,LOC101883290,uncharacterized LOC101883290, transcript variant X1	no Blast hit	2	no	keep	more than one exon
chr17	53395579	53396189	+	LL0000033638	XLOC_011873	low confidence,XP_021322939.1,LOC110438032,protein unc-79 homolog	high confidence,XP_016877009.1,UNC79,protein unc-79 homolog isoform X25	4	no	keep	high confidence BLAST hit to human protein
chr17	53453207	53456245	+	LL0000033639	XLOC_011878	low confidence,XP_021326442.1,LOC101887189,uncharacterized LOC101887189	no Blast hit	2	no	keep	more than one exon
chr17	458833	460716	-	LL0000033640	XLOC_011886	no Blast hit	low confidence,XP_005269575.1,PDZD8,PDZ domain-containing protein 8 isoform X1	1	no	discard	single exon with low confidence or no Blast hit
chr17	526299	577983	-	LL0000033641	XLOC_011889	high confidence,XP_021323203.1,LOC100334731,ryanodine receptor 3-like	high confidence,NP_001027.3,RYR3,ryanodine receptor 3 isoform 1	33	no	keep	high/moderate confidence zebrafish BLAST hit
chr17	594573	596554	-	LL0000033642	XLOC_011890	low confidence,NP_001025454.1,ldlra,low density lipoprotein receptor a	no Blast hit	1	no	discard	single exon with low confidence or no Blast hit
chr17	850275	850642	-	LL0000033643	XLOC_011898	no Blast hit	no Blast hit	1	no	discard	single exon with low confidence or no Blast hit
chr17	871109	887988	-	LL0000033644	XLOC_011900	high confidence,NP_001036210.1,dync1h1,dynein, cytoplasmic 1, heavy chain 1	high confidence,NP_001367.2,DYNC1H1,cytoplasmic dynein 1 heavy chain 1	34	no	keep	high/moderate confidence zebrafish BLAST hit
chr17	910893	911352	-	LL0000033645	XLOC_011901	low confidence,XP_005157778.2,LOC101883589,protocadherin Fat 4-like	no Blast hit	1	no	discard	single exon with low confidence or no Blast hit
chr17	1010727	1011309	-	LL0000033646	XLOC_011902	no Blast hit	no Blast hit	1	no	discard	single exon with low confidence or no Blast hit
chr17	1383435	1385214	-	LL0000033647	XLOC_011905	low confidence,XP_021330692.1,pfkfb3,6-phosphofructo-2-kinase/fructose-2,6-biphosphatase 3, transcript variant X3	low confidence,NP_004115.1,GMFB,glia maturation factor beta	1	no	discard	single exon with low confidence or no Blast hit
chr17	1386081	1390090	-	LL0000033648	XLOC_011906	no Blast hit	no Blast hit	1	no	discard	single exon with low confidence or no Blast hit
chr17	1654242	1654627	-	LL0000033649	XLOC_011909	moderate confidence,NP_001129452.1,zgc:194285,zgc:194285	low confidence,XP_011539617.1,IGSF3,immunoglobulin superfamily member 3 isoform X2	1	no	keep	high/moderate confidence zebrafish BLAST hit
chr17	1654785	1656371	-	LL0000033650	XLOC_011910	low confidence,XP_021335606.1,LOC101886098,Fc receptor-like protein 5, transcript variant X5	no Blast hit	1	no	discard	single exon with low confidence or no Blast hit
chr17	1750444	1750942	-	LL0000033651	XLOC_011913	low confidence,NP_998089.1,igfbp7,insulin-like growth factor binding protein 7	low confidence,NP_112191.2,KAZALD1,kazal-type serine protease inhibitor domain-containing protein 1 isoform a precursor	1	no	discard	single exon with low confidence or no Blast hit
chr17	1875351	1876470	-	LL0000033652	XLOC_011914	low confidence,XP_685398.3,pdzd3a,PDZ domain containing 3a	no Blast hit	1	no	discard	single exon with low confidence or no Blast hit
chr17	1876621	1877114	-	LL0000033653	XLOC_011915	low confidence,NP_001020473.1,nsun3,NOP2/Sun domain family, member 3	no Blast hit	1	no	discard	single exon with low confidence or no Blast hit
chr17	1877642	1885336	-	LL0000033654	XLOC_011916	moderate confidence,NP_001106978.1,il23r,interleukin 23 receptor	no Blast hit	1	no	keep	high/moderate confidence zebrafish BLAST hit
chr17	2275603	2278375	-	LL0000033655	XLOC_011921	no Blast hit	no Blast hit	1	no	discard	single exon with low confidence or no Blast hit
chr17	2329113	2330915	-	LL0000033656	XLOC_011923	low confidence,XP_017207299.1,birc6,baculoviral IAP repeat containing 6, transcript variant X8	low confidence,XP_016880548.1,DHX58,probable ATP-dependent RNA helicase DHX58 isoform X1	1	no	discard	single exon with low confidence or no Blast hit
chr17	2444822	2445444	-	LL0000033657	XLOC_011925	no Blast hit	low confidence,NP_006059.2,TLR6,toll-like receptor 6 precursor	1	no	discard	single exon with low confidence or no Blast hit
chr17	2445560	2446670	-	LL0000033658	XLOC_011926	moderate confidence,NP_001025454.1,ldlra,low density lipoprotein receptor a	no Blast hit	1	no	keep	high/moderate confidence zebrafish BLAST hit
chr17	2858501	2860301	-	LL0000033659	XLOC_011933	no Blast hit	no Blast hit	1	no	discard	single exon with low confidence or no Blast hit
chr17	3018067	3020263	-	LL0000033660	XLOC_011936	no Blast hit	no Blast hit	1	no	discard	single exon with low confidence or no Blast hit
chr17	3830698	3838173	-	LL0000033661	XLOC_011941	moderate confidence,XP_021330692.1,pfkfb3,6-phosphofructo-2-kinase/fructose-2,6-biphosphatase 3, transcript variant X3	low confidence,NP_115695.1,PRADC1,protease-associated domain-containing protein 1 precursor	1	no	keep	high/moderate confidence zebrafish BLAST hit
chr17	5139007	5139614	-	LL0000033662	XLOC_011948	low confidence,XP_009300606.3,LOC101883911,beta-1,3-galactosyltransferase 4-like	no Blast hit	1	no	discard	single exon with low confidence or no Blast hit
chr17	5141980	5151780	-	LL0000033663	XLOC_011949	low confidence,XP_005165763.1,dzip1,DAZ interacting zinc finger protein 1, transcript variant X2	low confidence,NP_699197.3,SVEP1,sushi, von Willebrand factor type A, EGF and pentraxin domain-containing protein 1 precursor	3	no	keep	more than one exon
chr17	5592060	5592991	-	LL0000033664	XLOC_011953	no Blast hit	no Blast hit	1	no	discard	single exon with low confidence or no Blast hit
chr17	5637256	5645154	-	LL0000033665	XLOC_011954	low confidence,XP_021330055.1,LOC110439213,glutamate receptor ionotropic, delta-1-like	low confidence,NP_004720.1,ZBED1,zinc finger BED domain-containing protein 1	1	no	discard	single exon with low confidence or no Blast hit
chr17	5645386	5649377	-	LL0000033666	XLOC_011955	low confidence,NP_001315129.1,si:dkey-77f5.3,si:dkey-77f5.3	no Blast hit	1	no	discard	single exon with low confidence or no Blast hit
chr17	5649495	5652997	-	LL0000033667	XLOC_011956	moderate confidence,NP_001025454.1,ldlra,low density lipoprotein receptor a	no Blast hit	1	no	keep	high/moderate confidence zebrafish BLAST hit
chr17	6524394	6525905	-	LL0000033668	XLOC_011976	high confidence,XP_005158640.1,LOC101886756,uncharacterized LOC101886756	no Blast hit	1	no	keep	high/moderate confidence zebrafish BLAST hit
chr17	7221296	7221839	-	LL0000033669	XLOC_011986	low confidence,XP_017211303.1,si:ch73-170d6.2,si:ch73-170d6.2, transcript variant X3	no Blast hit	1	no	discard	single exon with low confidence or no Blast hit
chr17	7221963	7225422	-	LL0000033670	XLOC_011987	low confidence,NP_001315129.1,si:dkey-77f5.3,si:dkey-77f5.3	no Blast hit	1	no	discard	single exon with low confidence or no Blast hit
chr17	8494431	8496265	-	LL0000033671	XLOC_012004	no Blast hit	no Blast hit	1	no	discard	single exon with low confidence or no Blast hit
chr17	10565000	10566373	-	LL0000033672	XLOC_012028	low confidence,XP_005162143.1,nol4lb,nucleolar protein 4-like b, transcript variant X2	no Blast hit	1	no	discard	single exon with low confidence or no Blast hit
chr17	10917707	10917954	-	LL0000033673	XLOC_012033	no Blast hit	no Blast hit	1	no	discard	single exon with low confidence or no Blast hit
chr17	11442825	11443393	-	LL0000033674	XLOC_012045	low confidence,XP_017209945.1,usp15,ubiquitin specific peptidase 15	no Blast hit	1	no	discard	single exon with low confidence or no Blast hit
chr17	11721533	11722609	-	LL0000033675	XLOC_012048	low confidence,XP_003198845.1,si:ch73-194h10.3,si:ch73-194h10.3	no Blast hit	1	no	discard	single exon with low confidence or no Blast hit
chr17	12269365	12269643	-	LL0000033676	XLOC_012052	low confidence,NP_001107945.1,zgc:172128,zgc:172128	no Blast hit	1	no	discard	single exon with low confidence or no Blast hit
chr17	15233734	15235205	-	LL0000033677	XLOC_012083	moderate confidence,NP_001003880.1,uspl1,ubiquitin specific peptidase like 1	low confidence,XP_011523646.1,QRICH2,glutamine-rich protein 2 isoform X4	2	no	keep	high/moderate confidence zebrafish BLAST hit
chr17	15842883	15843294	-	LL0000033678	XLOC_012096	no Blast hit	no Blast hit	1	no	discard	single exon with low confidence or no Blast hit
chr17	23287127	23288361	-	LL0000033679	XLOC_012171	low confidence,XP_017213594.1,LOC108191521,trace amine-associated receptor 13c-like	low confidence,XP_016861135.1,CMTM7,CKLF-like MARVEL transmembrane domain-containing protein 7 isoform X2	1	no	discard	single exon with low confidence or no Blast hit
chr17	23364083	23365402	-	LL0000033680	XLOC_012185	exact match,XP_021323971.1,LOC103909212,zinc finger CCHC domain-containing protein 12-like	moderate confidence,XP_011529314.1,ZCCHC18,zinc finger CCHC domain-containing protein 18 isoform X1	1	no	discard	single exon with low confidence or no Blast hit
chr17	24019511	24020588	-	LL0000033681	XLOC_012207	moderate confidence,XP_021333049.1,fam161a,family with sequence similarity 161, member A, transcript variant X2	low confidence,XP_016860563.1,FAM161A,protein FAM161A isoform X3	1	no	keep	high/moderate confidence zebrafish BLAST hit
chr17	25772298	25774205	-	LL0000033682	XLOC_012238	no Blast hit	no Blast hit	1	no	discard	single exon with low confidence or no Blast hit
chr17	29107872	29110343	-	LL0000033683	XLOC_012271	low confidence,XP_021330716.1,zgc:174704,zgc:174704, transcript variant X2	no Blast hit	1	no	discard	single exon with low confidence or no Blast hit
chr17	30421461	30423745	-	LL0000033684	XLOC_012286	high confidence,XP_021336058.1,tmem94,transmembrane protein 94, transcript variant X3	no Blast hit	2	no	discard	identified as duplicate with existing V4.2/RefSeq annotation
chr17	31084491	31084563	-	LL0000033685	XLOC_012298	low confidence,XP_021330196.1,LOC110438317,uncharacterized LOC110438317, transcript variant X1	no Blast hit	1	no	discard	single exon with low confidence or no Blast hit
chr17	31086187	31086259	-	LL0000033686	XLOC_012300	low confidence,XP_001921190.2,lratb,lecithin retinol acyltransferase b (phosphatidylcholine-retinol O-acyltransferase), transcript variant X3	low confidence,XP_011509253.1,ABCA12,ATP-binding cassette sub-family A member 12 isoform X1	1	no	discard	single exon with low confidence or no Blast hit
chr17	31086727	31086799	-	LL0000033687	XLOC_012301	no Blast hit	no Blast hit	1	no	discard	single exon with low confidence or no Blast hit
chr17	31087373	31087445	-	LL0000033688	XLOC_012302	low confidence,XP_021323526.1,si:dkey-47k20.8,si:dkey-47k20.8, transcript variant X2	low confidence,NP_003571.2,NSMAF,protein FAN isoform 1	1	no	discard	single exon with low confidence or no Blast hit
chr17	31093027	31093099	-	LL0000033689	XLOC_012303	low confidence,XP_009294012.1,ddx46,DEAD (Asp-Glu-Ala-Asp) box polypeptide 46, transcript variant X1	no Blast hit	1	no	discard	single exon with low confidence or no Blast hit
chr17	31093704	31093776	-	LL0000033690	XLOC_012304	no Blast hit	no Blast hit	1	no	discard	single exon with low confidence or no Blast hit
chr17	31093883	31093955	-	LL0000033691	XLOC_012305	low confidence,NP_001108059.2,zgc:172091,zgc:172091	no Blast hit	1	no	discard	single exon with low confidence or no Blast hit
chr17	31103775	31103847	-	LL0000033692	XLOC_012315	low confidence,XP_009302823.1,mycbp2,MYC binding protein 2, transcript variant X1	low confidence,NP_001171671.1,ZBTB33,transcriptional regulator Kaiso	1	no	discard	single exon with low confidence or no Blast hit
chr17	31115667	31116822	-	LL0000033693	XLOC_012323	low confidence,XP_021323812.1,LOC100332501,sterile alpha motif domain-containing protein 3-like, transcript variant X3	no Blast hit	1	no	discard	single exon with low confidence or no Blast hit
chr17	31662801	31664396	-	LL0000033694	XLOC_012338	low confidence,NP_001074053.2,mavs,mitochondrial antiviral signaling protein, transcript variant 2	no Blast hit	1	no	discard	single exon with low confidence or no Blast hit
chr17	34383225	34386292	-	LL0000033695	XLOC_012358	low confidence,XP_001344635.2,LOC100005637,uncharacterized LOC100005637	no Blast hit	4	no	keep	more than one exon
chr17	37655010	37655913	-	LL0000033696	XLOC_012390	moderate confidence,XP_021335606.1,LOC101886098,Fc receptor-like protein 5, transcript variant X5	low confidence,NP_001138840.1,PTPN3,tyrosine-protein phosphatase non-receptor type 3 isoform 2	1	no	keep	high/moderate confidence zebrafish BLAST hit
chr17	40716970	40718101	-	LL0000033697	XLOC_012408	low confidence,XP_021323532.1,LOC110438106,uncharacterized LOC110438106	low confidence,XP_016865088.1,GIN1,gypsy retrotransposon integrase-like protein 1 isoform X1	1	no	discard	single exon with low confidence or no Blast hit
chr17	40905507	40909288	-	LL0000033698	XLOC_012410	moderate confidence,NP_001106978.1,il23r,interleukin 23 receptor	no Blast hit	1	no	keep	high/moderate confidence zebrafish BLAST hit
chr17	41920084	41921024	-	LL0000033699	XLOC_012416	low confidence,XP_009296319.1,si:dkey-217l24.1,si:dkey-217l24.1, transcript variant X2	low confidence,NP_001357257.1,SHPRH,E3 ubiquitin-protein ligase SHPRH isoform c	1	no	discard	single exon with low confidence or no Blast hit
chr17	42167325	42176803	-	LL0000033700	XLOC_012418	high confidence,XP_021330197.1,LOC110438318,uncharacterized LOC110438318	no Blast hit	4	no	keep	high/moderate confidence zebrafish BLAST hit
chr17	42174327	42175530	-	LL0000033701	XLOC_012419	low confidence,XP_688194.1,galnt12,UDP-N-acetyl-alpha-D-galactosamine:polypeptide N-acetylgalactosaminyltransferase 12	no Blast hit	1	no	discard	single exon with low confidence or no Blast hit
chr17	42405926	42407266	-	LL0000033702	XLOC_012421	no Blast hit	low confidence,NP_775105.1,SHPRH,E3 ubiquitin-protein ligase SHPRH isoform b	1	no	discard	single exon with low confidence or no Blast hit
chr17	42931138	42933117	-	LL0000033703	XLOC_012427	moderate confidence,XP_021327358.1,LOC108190122,retrovirus-related Pol polyprotein from transposon 412, transcript variant X5	low confidence,XP_024309461.1,EEFSEC,selenocysteine-specific elongation factor isoform X2	1	no	keep	high/moderate confidence zebrafish BLAST hit
chr17	42998098	43000675	-	LL0000033704	XLOC_012429	no Blast hit	no Blast hit	1	no	discard	single exon with low confidence or no Blast hit
chr17	44240880	44242334	-	LL0000033705	XLOC_012448	no Blast hit	no Blast hit	1	no	discard	single exon with low confidence or no Blast hit
chr17	44936504	44937138	-	LL0000033706	XLOC_012456	low confidence,XP_021333804.1,LOC101885129,uncharacterized LOC101885129	low confidence,XP_016884416.1,TBX1,T-box transcription factor TBX1 isoform X3	1	no	discard	single exon with low confidence or no Blast hit
chr17	45061737	45062035	-	LL0000033707	XLOC_012460	low confidence,NP_942571.1,aif1l,allograft inflammatory factor 1-like	no Blast hit	1	no	discard	single exon with low confidence or no Blast hit
chr17	45722919	45725795	-	LL0000033708	XLOC_012470	no Blast hit	no Blast hit	1	no	discard	single exon with low confidence or no Blast hit
chr17	45727433	45728325	-	LL0000033709	XLOC_012471	no Blast hit	no Blast hit	1	no	discard	single exon with low confidence or no Blast hit
chr17	47005533	47007188	-	LL0000033710	XLOC_012492	low confidence,XP_021328859.1,grid1a,glutamate receptor, ionotropic, delta 1a, transcript variant X4	no Blast hit	1	no	discard	single exon with low confidence or no Blast hit
chr17	47011046	47012166	-	LL0000033711	XLOC_012493	no Blast hit	low confidence,NP_001354737.1,FBXL22,F-box and leucine-rich protein 22 isoform 3	1	no	discard	single exon with low confidence or no Blast hit
chr17	47012353	47014834	-	LL0000033712	XLOC_012494	low confidence,XP_021331450.1,LOC110437814,gastrula zinc finger protein XlCGF8.2DB-like	no Blast hit	1	no	discard	single exon with low confidence or no Blast hit
chr17	47040108	47042421	-	LL0000033713	XLOC_012495	low confidence,NP_001035278.1,hsd17b2,hydroxysteroid (17-beta) dehydrogenase 2	no Blast hit	1	no	discard	single exon with low confidence or no Blast hit
chr17	48477637	48484426	-	LL0000033714	XLOC_012502	high confidence,XP_021322932.1,LOC100538332,uncharacterized LOC100538332	low confidence,NP_001171597.1,IGLL5,immunoglobulin lambda-like polypeptide 5 isoform 1	5	no	keep	high/moderate confidence zebrafish BLAST hit
chr17	48606701	48608215	-	LL0000033715	XLOC_012505	low confidence,XP_021322932.1,LOC100538332,uncharacterized LOC100538332	low confidence,XP_011544500.1,LOC102723407,immunoglobulin heavy variable 4-38-2-like	2	no	keep	more than one exon
chr17	48678120	48680048	-	LL0000033716	XLOC_012506	no Blast hit	low confidence,XP_016873095.1,HARBI1,putative nuclease HARBI1 isoform X2	1	no	discard	single exon with low confidence or no Blast hit
chr17	48806514	48807241	-	LL0000033717	XLOC_012510	no Blast hit	no Blast hit	1	no	discard	single exon with low confidence or no Blast hit
chr17	49350707	49351094	-	LL0000033718	XLOC_012518	low confidence,XP_021333628.1,LOC110439944,uncharacterized LOC110439944	no Blast hit	1	no	discard	single exon with low confidence or no Blast hit
chr17	49621223	49621755	-	LL0000033719	XLOC_012527	low confidence,NP_001139082.1,tmem176,transmembrane protein 176	low confidence,XP_011532020.1,MAP4,microtubule-associated protein 4 isoform X14	1	no	discard	single exon with low confidence or no Blast hit
chr17	50987824	50988256	-	LL0000033720	XLOC_012546	low confidence,NP_919401.1,gjd2b,gap junction protein delta 2b	low confidence,NP_065711.1,GJD2,gap junction delta-2 protein	1	no	discard	single exon with low confidence or no Blast hit
chr17	52102296	52114331	-	LL0000033721	XLOC_012561	no Blast hit	no Blast hit	2	no	keep	more than one exon
chr17	52678573	52680287	-	LL0000033722	XLOC_012571	low confidence,NP_001038409.1,jtb,jumping translocation breakpoint	low confidence,XP_011529667.1,NKRF,NF-kappa-B-repressing factor isoform X1	5	no	keep	more than one exon
chr17	52808424	52814782	-	LL0000033723	XLOC_012572	moderate confidence,XP_021335606.1,LOC101886098,Fc receptor-like protein 5, transcript variant X5	no Blast hit	1	no	keep	high/moderate confidence zebrafish BLAST hit
chr17	52814908	52821178	-	LL0000033724	XLOC_012573	no Blast hit	no Blast hit	1	no	discard	single exon with low confidence or no Blast hit
chr17	53247776	53248582	-	LL0000033725	XLOC_012575	no Blast hit	no Blast hit	1	no	discard	single exon with low confidence or no Blast hit
chr17	53260249	53261796	-	LL0000033726	XLOC_012576	low confidence,XP_021333058.1,LOC101883618,uncharacterized protein PF11_0213-like	no Blast hit	1	no	discard	single exon with low confidence or no Blast hit
chr18	33839	34979	+	LL0000033727	XLOC_012589	no Blast hit	no Blast hit	1	no	discard	single exon with low confidence or no Blast hit
chr18	625431	626510	+	LL0000033728	XLOC_012599	no Blast hit	no Blast hit	1	no	discard	single exon with low confidence or no Blast hit
chr18	721724	723476	+	LL0000033729	XLOC_012602	no Blast hit	no Blast hit	1	no	discard	single exon with low confidence or no Blast hit
chr18	723977	725868	+	LL0000033730	XLOC_012603	low confidence,NP_001025454.1,ldlra,low density lipoprotein receptor a	no Blast hit	1	no	discard	single exon with low confidence or no Blast hit
chr18	726011	727872	+	LL0000033731	XLOC_012604	no Blast hit	no Blast hit	1	no	discard	single exon with low confidence or no Blast hit
chr18	732930	733962	+	LL0000033732	XLOC_012605	no Blast hit	no Blast hit	1	no	discard	single exon with low confidence or no Blast hit
chr18	734900	736974	+	LL0000033733	XLOC_012606	no Blast hit	no Blast hit	1	no	discard	single exon with low confidence or no Blast hit
chr18	1613767	1615703	+	LL0000033734	XLOC_012617	low confidence,XP_021323406.1,LOC101885127,uncharacterized LOC101885127, transcript variant X1	low confidence,NP_001159827.1,LFNG,beta-1,3-N-acetylglucosaminyltransferase lunatic fringe isoform c	1	no	discard	single exon with low confidence or no Blast hit
chr18	1927495	1929022	+	LL0000033735	XLOC_012620	low confidence,NP_001008578.1,mtfr1,mitochondrial fission regulator 1	no Blast hit	2	no	keep	more than one exon
chr18	2966841	2970735	+	LL0000033736	XLOC_012632	low confidence,NP_001074053.2,mavs,mitochondrial antiviral signaling protein, transcript variant 2	low confidence,NP_059986.1,RAB39A,ras-related protein Rab-39A	1	no	discard	single exon with low confidence or no Blast hit
chr18	2996772	3000134	+	LL0000033737	XLOC_012633	no Blast hit	no Blast hit	1	no	discard	single exon with low confidence or no Blast hit
chr18	2983017	2985016	+	LL0000033738	XLOC_012634	no Blast hit	no Blast hit	1	no	discard	single exon with low confidence or no Blast hit
chr18	3646930	3666039	+	LL0000033739	XLOC_012652	low confidence,XP_021323881.1,si:ch73-367f21.4,si:ch73-367f21.4	no Blast hit	2	no	keep	more than one exon
chr18	3650187	3651160	+	LL0000033740	XLOC_012653	no Blast hit	no Blast hit	1	no	discard	single exon with low confidence or no Blast hit
chr18	3789170	3878269	+	LL0000033741	XLOC_012654	exact match,XP_009291652.2,LOC101884666,protein unc-13 homolog C-like, transcript variant X2	high confidence,XP_016877714.1,UNC13C,protein unc-13 homolog C isoform X3	10	no	discard	identified as duplicate with existing V4.2/RefSeq annotation
chr18	4325395	4335794	+	LL0000033742	XLOC_012657	low confidence,XP_021330055.1,LOC110439213,glutamate receptor ionotropic, delta-1-like	low confidence,XP_024307015.1,YES1,tyrosine-protein kinase Yes isoform X2	2	no	keep	more than one exon
chr18	4755425	4755702	+	LL0000033743	XLOC_012660	low confidence,XP_021332570.1,rhot1b,ras homolog family member T1, transcript variant X4	no Blast hit	1	no	discard	single exon with low confidence or no Blast hit
chr18	5121858	5123804	+	LL0000033744	XLOC_012665	low confidence,XP_021335606.1,LOC101886098,Fc receptor-like protein 5, transcript variant X5	low confidence,XP_016884172.1,CABIN1,calcineurin-binding protein cabin-1 isoform X13	1	no	discard	single exon with low confidence or no Blast hit
chr18	5230884	5231492	+	LL0000033745	XLOC_012668	low confidence,XP_005166989.2,edem3,ER degradation enhancer, mannosidase alpha-like 3, transcript variant X1	low confidence,NP_061927.2,FAM35A,shieldin complex subunit 2 isoform 2	1	no	discard	single exon with low confidence or no Blast hit
chr18	5831211	5839906	+	LL0000033746	XLOC_012680	low confidence,NP_001038409.1,jtb,jumping translocation breakpoint	no Blast hit	4	no	keep	more than one exon
chr18	6006380	6007646	+	LL0000033747	XLOC_012688	low confidence,NP_001124069.1,zgc:193538,zgc:193538	no Blast hit	1	no	discard	single exon with low confidence or no Blast hit
chr18	7515020	7516529	+	LL0000033748	XLOC_012711	no Blast hit	no Blast hit	1	no	discard	single exon with low confidence or no Blast hit
chr18	8487694	8490874	+	LL0000033749	XLOC_012729	low confidence,NP_001025454.1,ldlra,low density lipoprotein receptor a	no Blast hit	5	no	keep	more than one exon
chr18	10064753	10066186	+	LL0000033750	XLOC_012746	no Blast hit	no Blast hit	1	no	discard	single exon with low confidence or no Blast hit
chr18	10066611	10069860	+	LL0000033751	XLOC_012747	no Blast hit	no Blast hit	1	no	discard	single exon with low confidence or no Blast hit
chr18	10563991	10636295	+	LL0000033752	XLOC_012749	low confidence,XP_021333777.1,LOC110439968,GTPase IMAP family member 4-like	no Blast hit	5	no	keep	more than one exon
chr18	11554374	11555655	+	LL0000033753	XLOC_012757	no Blast hit	no Blast hit	1	no	discard	single exon with low confidence or no Blast hit
chr18	11977662	11983182	+	LL0000033754	XLOC_012761	low confidence,NP_001106978.1,il23r,interleukin 23 receptor	no Blast hit	3	no	keep	more than one exon
chr18	13363536	13365159	+	LL0000033755	XLOC_012772	matches or overlaps with known lincRNA	no Blast hit	1	yes	keep	maps to previously identified lincRNA
chr18	13366705	13367350	+	LL0000033756	XLOC_012773	no Blast hit	no Blast hit	1	no	discard	single exon with low confidence or no Blast hit
chr18	13447312	13447526	+	LL0000033757	XLOC_012774	low confidence,NP_001103481.1,dock1,dedicator of cytokinesis 1	low confidence,XP_016871306.1,DOCK1,dedicator of cytokinesis protein 1 isoform X7	1	no	discard	single exon with low confidence or no Blast hit
chr18	13494291	13515147	+	LL0000033758	XLOC_012775	low confidence,XP_005166056.1,chrm2a,cholinergic receptor, muscarinic 2a, transcript variant X1	low confidence,XP_011510917.1,NAALADL2,inactive N-acetylated-alpha-linked acidic dipeptidase-like protein 2 isoform X4	3	no	keep	more than one exon
chr18	14425455	14433006	+	LL0000033759	XLOC_012780	no Blast hit	no Blast hit	1	no	discard	single exon with low confidence or no Blast hit
chr18	15160285	15164657	+	LL0000033760	XLOC_012792	low confidence,NP_001107027.1,cadm2b,cell adhesion molecule 2b	low confidence,XP_011541220.1,DSCAML1,Down syndrome cell adhesion molecule-like protein 1 isoform X2	1	no	discard	single exon with low confidence or no Blast hit
chr18	15166273	15167629	+	LL0000033761	XLOC_012793	low confidence,NP_001106978.1,il23r,interleukin 23 receptor	no Blast hit	1	no	discard	single exon with low confidence or no Blast hit
chr18	15723656	15727819	+	LL0000033762	XLOC_012803	low confidence,XP_021330857.1,LOC100332433,gastrula zinc finger protein XlCGF8.2DB-like	no Blast hit	1	no	discard	single exon with low confidence or no Blast hit
chr18	16974217	16976061	+	LL0000033763	XLOC_012822	high confidence,XP_009300337.1,LOC101884973,hydroxycarboxylic acid receptor 2-like, transcript variant X2	low confidence,NP_004092.1,F2RL2,proteinase-activated receptor 3 isoform 1 precursor	1	no	keep	high/moderate confidence zebrafish BLAST hit
chr18	17178489	17180068	+	LL0000033764	XLOC_012827	no Blast hit	no Blast hit	1	no	discard	single exon with low confidence or no Blast hit
chr18	18336233	18358776	+	LL0000033765	XLOC_012846	low confidence,XP_021322389.1,si:ch211-154o6.3,si:ch211-154o6.3, transcript variant X1	low confidence,XP_016881820.1,TMEM190,transmembrane protein 190 isoform X1	3	no	keep	more than one exon
chr18	20260386	20262205	+	LL0000033766	XLOC_012880	no Blast hit	low confidence,XP_006712847.1,ILKAP,integrin-linked kinase-associated serine/threonine phosphatase 2C isoform X1	1	no	discard	single exon with low confidence or no Blast hit
chr18	22118602	22119375	+	LL0000033767	XLOC_012900	low confidence,XP_021328859.1,grid1a,glutamate receptor, ionotropic, delta 1a, transcript variant X4	no Blast hit	1	no	discard	single exon with low confidence or no Blast hit
chr18	24731401	24733623	+	LL0000033768	XLOC_012917	low confidence,XP_021333112.1,bco1l,beta-carotene oxygenase 1, like, transcript variant X1	no Blast hit	1	no	discard	single exon with low confidence or no Blast hit
chr18	24734835	24735860	+	LL0000033769	XLOC_012918	no Blast hit	no Blast hit	1	no	discard	single exon with low confidence or no Blast hit
chr18	24748743	24752098	+	LL0000033770	XLOC_012920	no Blast hit	no Blast hit	1	no	discard	single exon with low confidence or no Blast hit
chr18	24766583	24767003	+	LL0000033771	XLOC_012921	low confidence,XP_017207647.2,pik3c2g,phosphatidylinositol-4-phosphate 3-kinase catalytic subunit type 2 gamma, transcript variant X1	no Blast hit	1	no	discard	single exon with low confidence or no Blast hit
chr18	25342951	25350048	+	LL0000033772	XLOC_012926	high confidence,XP_021322682.1,LOC101882511,uncharacterized LOC101882511	no Blast hit	2	no	keep	high/moderate confidence zebrafish BLAST hit
chr18	25344847	25345797	+	LL0000033773	XLOC_012927	no Blast hit	no Blast hit	1	no	discard	single exon with low confidence or no Blast hit
chr18	25350233	25353330	+	LL0000033774	XLOC_012928	low confidence,XP_021331692.1,thy1,Thy-1 cell surface antigen, transcript variant X1	low confidence,NP_001138872.1,ADAD2,adenosine deaminase domain-containing protein 2 isoform 2	1	no	discard	single exon with low confidence or no Blast hit
chr18	26231141	26231802	+	LL0000033775	XLOC_012934	no Blast hit	no Blast hit	1	no	discard	single exon with low confidence or no Blast hit
chr18	26234760	26235490	+	LL0000033776	XLOC_012935	moderate confidence,NP_571068.2,crestin,crestin	no Blast hit	1	no	keep	high/moderate confidence zebrafish BLAST hit
chr18	26236485	26237472	+	LL0000033777	XLOC_012936	low confidence,XP_005174269.3,prtgb,protogenin homolog b (Gallus gallus)	low confidence,NP_004733.2,MAGI1,membrane-associated guanylate kinase, WW and PDZ domain-containing protein 1 isoform b	1	no	discard	single exon with low confidence or no Blast hit
chr18	26237881	26240793	+	LL0000033778	XLOC_012937	low confidence,XP_021324313.1,ftr06,finTRIM family, member 6, transcript variant X1	low confidence,NP_001138872.1,ADAD2,adenosine deaminase domain-containing protein 2 isoform 2	1	no	discard	single exon with low confidence or no Blast hit
chr18	26995119	26998522	+	LL0000033779	XLOC_012946	low confidence,XP_021329186.1,LOC110439107,uncharacterized LOC110439107	no Blast hit	7	no	keep	more than one exon
chr18	28247753	28248276	+	LL0000033780	XLOC_012959	no Blast hit	no Blast hit	1	no	discard	single exon with low confidence or no Blast hit
chr18	28248417	28251901	+	LL0000033781	XLOC_012960	low confidence,NP_001025364.1,zgc:114081,zgc:114081	no Blast hit	1	no	discard	single exon with low confidence or no Blast hit
chr18	29583717	29589358	+	LL0000033782	XLOC_012967	low confidence,XP_021335606.1,LOC101886098,Fc receptor-like protein 5, transcript variant X5	no Blast hit	1	no	discard	single exon with low confidence or no Blast hit
chr18	30085536	30086853	+	LL0000033783	XLOC_012973	high confidence,XP_009296628.1,LOC103909980,uncharacterized protein K02A2.6-like	low confidence,NP_001128360.1,RTL1,retrotransposon-like protein 1	1	no	keep	high/moderate confidence zebrafish BLAST hit
chr18	31608634	31609200	+	LL0000033784	XLOC_012988	low confidence,XP_021325648.1,magi3a,membrane associated guanylate kinase, WW and PDZ domain containing 3a, transcript variant X4	low confidence,NP_001333683.1,PIGW,phosphatidylinositol-glycan biosynthesis class W protein	1	no	discard	single exon with low confidence or no Blast hit
chr18	32177680	32180158	+	LL0000033785	XLOC_012995	high confidence,XP_017210693.2,LOC108183335,uncharacterized LOC108183335	low confidence,XP_024303002.1,C8orf33,UPF0488 protein C8orf33 isoform X1	1	no	keep	high/moderate confidence zebrafish BLAST hit
chr18	32462503	32463214	+	LL0000033786	XLOC_012999	low confidence,XP_005174579.1,camta1,calmodulin binding transcription activator 1, transcript variant X3	low confidence,NP_001275631.1,GGT6,glutathione hydrolase 6 isoform c	1	no	discard	single exon with low confidence or no Blast hit
chr18	32872895	32875340	+	LL0000033787	XLOC_013005	high confidence,XP_021331336.1,LOC101886601,uncharacterized LOC101886601, transcript variant X2	high confidence,XP_016865088.1,GIN1,gypsy retrotransposon integrase-like protein 1 isoform X1	1	no	keep	high/moderate confidence zebrafish BLAST hit
chr18	32966451	32974104	+	LL0000033788	XLOC_013009	exact match,XP_021323511.1,LOC110438103,uncharacterized LOC110438103	no Blast hit	2	no	keep	exact match BLAST hit with zebrafish protein
chr18	33865856	33869596	+	LL0000033789	XLOC_013050	low confidence,NP_001071220.1,zgc:123035,zgc:123035, transcript variant 2	no Blast hit	1	no	discard	single exon with low confidence or no Blast hit
chr18	33940490	33940828	+	LL0000033790	XLOC_013053	low confidence,NP_001259013.1,adka,adenosine kinase a, transcript variant 2	low confidence,NP_001245229.1,SHTN1,shootin-1 isoform e	1	no	discard	single exon with low confidence or no Blast hit
chr18	35010759	35011416	+	LL0000033791	XLOC_013060	low confidence,XP_021331055.1,LOC110439400,uncharacterized LOC110439400	no Blast hit	1	no	discard	single exon with low confidence or no Blast hit
chr18	35018398	35046761	+	LL0000033792	XLOC_013061	moderate confidence,NP_001106978.1,il23r,interleukin 23 receptor	no Blast hit	5	no	keep	high/moderate confidence zebrafish BLAST hit
chr18	35030630	35031486	+	LL0000033793	XLOC_013062	no Blast hit	no Blast hit	1	no	discard	single exon with low confidence or no Blast hit
chr18	35031576	35033045	+	LL0000033794	XLOC_013063	low confidence,NP_001038409.1,jtb,jumping translocation breakpoint	no Blast hit	1	no	discard	single exon with low confidence or no Blast hit
chr18	35055553	35060879	+	LL0000033795	XLOC_013064	low confidence,NP_001034260.1,lama5,laminin, alpha 5	no Blast hit	1	no	discard	single exon with low confidence or no Blast hit
chr18	35063301	35065264	+	LL0000033796	XLOC_013065	high confidence,XP_021324628.1,LOC110438216,uncharacterized LOC110438216, transcript variant X2	high confidence,NP_001128360.1,RTL1,retrotransposon-like protein 1	1	no	keep	high/moderate confidence zebrafish BLAST hit
chr18	35067606	35069083	+	LL0000033797	XLOC_013066	no Blast hit	no Blast hit	1	no	discard	single exon with low confidence or no Blast hit
chr18	35421474	35422034	+	LL0000033798	XLOC_013073	low confidence,NP_001038409.1,jtb,jumping translocation breakpoint	low confidence,XP_016877192.1,BRMS1L,breast cancer metastasis-suppressor 1-like protein isoform X2	1	no	discard	single exon with low confidence or no Blast hit
chr18	36052121	36052992	+	LL0000033799	XLOC_013080	no Blast hit	no Blast hit	1	no	discard	single exon with low confidence or no Blast hit
chr18	36053109	36054260	+	LL0000033800	XLOC_013081	high confidence,NP_001106978.1,il23r,interleukin 23 receptor	low confidence,NP_001309233.1,CNIH3,protein cornichon homolog 3 isoform 4	1	no	keep	high/moderate confidence zebrafish BLAST hit
chr18	36734933	36737615	+	LL0000033801	XLOC_013086	moderate confidence,XP_021335606.1,LOC101886098,Fc receptor-like protein 5, transcript variant X5	no Blast hit	1	no	keep	high/moderate confidence zebrafish BLAST hit
chr18	37475189	37475897	+	LL0000033802	XLOC_013097	low confidence,NP_001092699.2,klhl13,kelch-like family member 13, transcript variant 2	no Blast hit	1	no	discard	single exon with low confidence or no Blast hit
chr18	37639686	37640854	+	LL0000033803	XLOC_013098	low confidence,NP_001038409.1,jtb,jumping translocation breakpoint	no Blast hit	1	no	discard	single exon with low confidence or no Blast hit
chr18	37641577	37642798	+	LL0000033804	XLOC_013099	low confidence,NP_001124133.1,vars2,valyl-tRNA synthetase 2, mitochondrial (putative)	no Blast hit	1	no	discard	single exon with low confidence or no Blast hit
chr18	37717479	37719528	+	LL0000033805	XLOC_013100	low confidence,NP_001076365.2,ccl38.1,chemokine (C-C motif) ligand 38, duplicate 1	no Blast hit	1	no	discard	single exon with low confidence or no Blast hit
chr18	38403576	38518605	+	LL0000033806	XLOC_013106	low confidence,XP_017210640.2,LOC108183297,zinc finger BED domain-containing protein 5-like	moderate confidence,XP_011512589.1,ZBED9,SCAN domain-containing protein 3 isoform X1	2	no	keep	moderate confidence BLAST hit to human protein
chr18	38536990	38542460	+	LL0000033807	XLOC_013107	low confidence,XP_021334698.1,LOC101882148,uncharacterized LOC101882148, transcript variant X5	no Blast hit	8	no	discard	identified as duplicate with existing V4.2/RefSeq annotation
chr18	40299791	40300067	+	LL0000033808	XLOC_013124	low confidence,XP_021332794.1,farp2,FERM, RhoGEF and pleckstrin domain protein 2, transcript variant X5	low confidence,XP_016869139.1,SLC45A4,solute carrier family 45 member 4 isoform X4	1	no	discard	single exon with low confidence or no Blast hit
chr18	40519127	40522897	+	LL0000033809	XLOC_013129	low confidence,NP_998067.1,slc13a3,solute carrier family 13 (sodium-dependent dicarboxylate transporter), member 3	no Blast hit	3	no	keep	more than one exon
chr18	41468154	41473773	+	LL0000033810	XLOC_013142	low confidence,NP_001030338.2,svila,supervillin a	no Blast hit	1	no	discard	single exon with low confidence or no Blast hit
chr18	41596262	41597738	+	LL0000033811	XLOC_013148	low confidence,XP_695016.2,LOC566646,uncharacterized LOC566646, transcript variant X1	no Blast hit	1	no	discard	single exon with low confidence or no Blast hit
chr18	41597910	41599281	+	LL0000033812	XLOC_013149	moderate confidence,NP_001025454.1,ldlra,low density lipoprotein receptor a	no Blast hit	1	no	keep	high/moderate confidence zebrafish BLAST hit
chr18	44362751	44363571	+	LL0000033813	XLOC_013167	low confidence,XP_017214605.1,LOC108192163,uncharacterized LOC108192163	low confidence,NP_001073328.1,ADGRG2,adhesion G-protein coupled receptor G2 isoform 2 precursor	1	no	discard	single exon with low confidence or no Blast hit
chr18	44714408	44715962	+	LL0000033814	XLOC_013173	low confidence,XP_021330858.1,znf1085,zinc finger protein 1085	no Blast hit	1	no	discard	single exon with low confidence or no Blast hit
chr18	44878084	44879576	+	LL0000033815	XLOC_013178	low confidence,NP_001116088.1,zgc:171435,zgc:171435	no Blast hit	1	no	discard	single exon with low confidence or no Blast hit
chr18	45354706	45354890	+	LL0000033816	XLOC_013184	low confidence,XP_009299026.2,LOC100536750,gastrula zinc finger protein XlCGF52.1-like	low confidence,XP_011524044.1,SEH1L,nucleoporin SEH1 isoform X1	1	no	discard	single exon with low confidence or no Blast hit
chr18	45523517	45526357	+	LL0000033817	XLOC_013186	low confidence,NP_001315129.1,si:dkey-77f5.3,si:dkey-77f5.3	low confidence,NP_060546.2,ARMC4,armadillo repeat-containing protein 4 isoform 1	1	no	discard	single exon with low confidence or no Blast hit
chr18	45949823	45953428	+	LL0000033818	XLOC_013197	low confidence,XP_005170414.1,zgc:171435,zgc:171435, transcript variant X2	low confidence,XP_016882387.1,ZNF562,zinc finger protein 562 isoform X2	2	no	keep	more than one exon
chr18	45985485	45987685	+	LL0000033819	XLOC_013199	low confidence,XP_009289536.1,si:ch211-276i12.9,si:ch211-276i12.9	no Blast hit	1	no	discard	single exon with low confidence or no Blast hit
chr18	46805669	46807835	+	LL0000033820	XLOC_013210	low confidence,XP_001920594.5,tlr8a,toll-like receptor 8a	no Blast hit	1	no	discard	single exon with low confidence or no Blast hit
chr18	46808149	46808729	+	LL0000033821	XLOC_013211	no Blast hit	no Blast hit	1	no	discard	single exon with low confidence or no Blast hit
chr18	47049339	47052841	+	LL0000033822	XLOC_013212	low confidence,XP_021324890.1,si:dkey-71d15.2,si:dkey-71d15.2, transcript variant X3	no Blast hit	2	no	keep	more than one exon
chr18	47444203	47445670	+	LL0000033823	XLOC_013215	low confidence,NP_956928.1,apbb1ip,amyloid beta (A4) precursor protein-binding, family B, member 1 interacting protein	no Blast hit	1	no	discard	single exon with low confidence or no Blast hit
chr18	47453767	47455070	+	LL0000033824	XLOC_013216	no Blast hit	low confidence,NP_002982.2,CCL24,C-C motif chemokine 24 precursor	1	no	discard	single exon with low confidence or no Blast hit
chr18	48183920	48218517	+	LL0000033825	XLOC_013219	low confidence,XP_021331326.1,LOC110439550,uncharacterized LOC110439550, transcript variant X1	no Blast hit	6	no	keep	more than one exon
chr18	49941025	49955278	+	LL0000033826	XLOC_013240	high confidence,XP_002665347.3,dusp8b,dual specificity phosphatase 8b	high confidence,NP_085143.1,DUSP16,dual specificity protein phosphatase 16	4	no	keep	high/moderate confidence zebrafish BLAST hit
chr18	49955512	49957084	+	LL0000033827	XLOC_013241	no Blast hit	no Blast hit	1	no	discard	single exon with low confidence or no Blast hit
chr18	50971493	50972264	+	LL0000033828	XLOC_013259	low confidence,XP_005161363.1,pwwp2a,PWWP domain containing 2A, transcript variant X2	no Blast hit	1	no	discard	single exon with low confidence or no Blast hit
chr18	46352	48383	-	LL0000033829	XLOC_013264	low confidence,XP_017207299.1,birc6,baculoviral IAP repeat containing 6, transcript variant X8	no Blast hit	1	no	discard	single exon with low confidence or no Blast hit
chr18	48494	50299	-	LL0000033830	XLOC_013265	no Blast hit	no Blast hit	1	no	discard	single exon with low confidence or no Blast hit
chr18	994036	997603	-	LL0000033831	XLOC_013282	low confidence,XP_021326182.1,ano10b,anoctamin 10b, transcript variant X1	no Blast hit	1	no	discard	single exon with low confidence or no Blast hit
chr18	999866	1001233	-	LL0000033832	XLOC_013283	no Blast hit	no Blast hit	1	no	discard	single exon with low confidence or no Blast hit
chr18	1600456	1600692	-	LL0000033833	XLOC_013289	low confidence,XP_021325358.1,rnh1,ribonuclease/angiogenin inhibitor 1	low confidence,XP_005249973.1,RAPGEF5,rap guanine nucleotide exchange factor 5 isoform X3	1	no	discard	single exon with low confidence or no Blast hit
chr18	2182633	2183728	-	LL0000033834	XLOC_013293	no Blast hit	low confidence,XP_016878945.1,CENPN,centromere protein N isoform X2	1	no	discard	single exon with low confidence or no Blast hit
chr18	2183868	2184826	-	LL0000033835	XLOC_013294	moderate confidence,NP_001129452.1,zgc:194285,zgc:194285	no Blast hit	1	no	keep	high/moderate confidence zebrafish BLAST hit
chr18	3673676	3674079	-	LL0000033836	XLOC_013311	high confidence,NP_958465.1,plk3,polo-like kinase 3 (Drosophila)	low confidence,NP_006613.2,PLK2,serine/threonine-protein kinase PLK2 isoform 1	1	no	keep	high/moderate confidence zebrafish BLAST hit
chr18	5356865	5357986	-	LL0000033837	XLOC_013322	no Blast hit	no Blast hit	1	no	discard	single exon with low confidence or no Blast hit
chr18	5469994	5472197	-	LL0000033838	XLOC_013326	moderate confidence,NP_001032516.1,zgc:123258,zgc:123258	low confidence,XP_016878169.1,SPPL2A,signal peptide peptidase-like 2A isoform X2	2	no	keep	high/moderate confidence zebrafish BLAST hit
chr18	6014081	6021739	-	LL0000033839	XLOC_013339	low confidence,XP_021324890.1,si:dkey-71d15.2,si:dkey-71d15.2, transcript variant X3	low confidence,XP_024305096.1,DCT,L-dopachrome tautomerase isoform X2	2	no	keep	more than one exon
chr18	6094681	6096490	-	LL0000033840	XLOC_013340	low confidence,XP_009304105.1,adgrl2a,adhesion G protein-coupled receptor L2a, transcript variant X14	no Blast hit	1	no	discard	single exon with low confidence or no Blast hit
chr18	6096769	6099311	-	LL0000033841	XLOC_013341	no Blast hit	no Blast hit	1	no	discard	single exon with low confidence or no Blast hit
chr18	6266049	6267683	-	LL0000033842	XLOC_013343	no Blast hit	no Blast hit	1	no	discard	single exon with low confidence or no Blast hit
chr18	6267931	6270255	-	LL0000033843	XLOC_013344	moderate confidence,NP_001107105.1,si:dkey-103d23.5,si:dkey-103d23.5	no Blast hit	1	no	keep	high/moderate confidence zebrafish BLAST hit
chr18	6413604	6414199	-	LL0000033844	XLOC_013345	low confidence,NP_001116778.1,LOC792509,uncharacterized protein LOC792509 precursor	no Blast hit	1	no	discard	single exon with low confidence or no Blast hit
chr18	6416059	6418103	-	LL0000033845	XLOC_013346	low confidence,XP_021335606.1,LOC101886098,Fc receptor-like protein 5, transcript variant X5	no Blast hit	1	no	discard	single exon with low confidence or no Blast hit
chr18	6779347	6780591	-	LL0000033846	XLOC_013352	low confidence,XP_009305260.1,zranb1a,zinc finger, RAN-binding domain containing 1a	no Blast hit	1	no	discard	single exon with low confidence or no Blast hit
chr18	6994776	6995126	-	LL0000033847	XLOC_013358	no Blast hit	no Blast hit	1	no	discard	single exon with low confidence or no Blast hit
chr18	7651782	7653477	-	LL0000033848	XLOC_013374	low confidence,XP_021335606.1,LOC101886098,Fc receptor-like protein 5, transcript variant X5	no Blast hit	1	no	discard	single exon with low confidence or no Blast hit
chr18	9252336	9253902	-	LL0000033849	XLOC_013390	high confidence,XP_021322452.1,LOC103908963,uncharacterized LOC103908963	low confidence,XP_011532359.1,TOP2B,DNA topoisomerase 2-beta isoform X1	1	no	keep	high/moderate confidence zebrafish BLAST hit
chr18	10286755	10287697	-	LL0000033850	XLOC_013394	low confidence,XP_021326683.1,LOC110438488,uncharacterized LOC110438488	no Blast hit	1	no	discard	single exon with low confidence or no Blast hit
chr18	12859341	12860783	-	LL0000033851	XLOC_013409	no Blast hit	no Blast hit	1	no	discard	single exon with low confidence or no Blast hit
chr18	15435443	15440644	-	LL0000033852	XLOC_013439	no Blast hit	no Blast hit	5	no	keep	more than one exon
chr18	16972316	16972462	-	LL0000033853	XLOC_013461	low confidence,NP_956147.1,wtap,WT1 associated protein	no Blast hit	1	no	discard	single exon with low confidence or no Blast hit
chr18	17777526	17779037	-	LL0000033854	XLOC_013472	low confidence,NP_001020640.1,iah1,isoamyl acetate-hydrolyzing esterase 1 homolog (S. cerevisiae)	no Blast hit	1	no	discard	single exon with low confidence or no Blast hit
chr18	17779274	17780348	-	LL0000033855	XLOC_013473	low confidence,XP_017212911.1,LOC103911479,uncharacterized LOC103911479	no Blast hit	1	no	discard	single exon with low confidence or no Blast hit
chr18	19409526	19412498	-	LL0000033856	XLOC_013497	high confidence,XP_021332192.1,LOC101884570,uncharacterized LOC101884570, transcript variant X1	no Blast hit	1	no	keep	high/moderate confidence zebrafish BLAST hit
chr18	23852908	23854435	-	LL0000033857	XLOC_013551	no Blast hit	no Blast hit	1	no	discard	single exon with low confidence or no Blast hit
chr18	23864603	23865355	-	LL0000033858	XLOC_013552	no Blast hit	no Blast hit	1	no	discard	single exon with low confidence or no Blast hit
chr18	25385003	25385767	-	LL0000033859	XLOC_013565	no Blast hit	no Blast hit	1	no	discard	single exon with low confidence or no Blast hit
chr18	25386595	25389057	-	LL0000033860	XLOC_013566	no Blast hit	no Blast hit	1	no	discard	single exon with low confidence or no Blast hit
chr18	27642302	27643400	-	LL0000033861	XLOC_013592	low confidence,XP_001331789.1,si:ch211-270n8.1,si:ch211-270n8.1	no Blast hit	1	no	discard	single exon with low confidence or no Blast hit
chr18	29757886	29758710	-	LL0000033862	XLOC_013600	low confidence,XP_017207899.2,kcnh8,potassium voltage-gated channel, subfamily H (eag-related), member 8	no Blast hit	1	no	discard	single exon with low confidence or no Blast hit
chr18	29939674	29947333	-	LL0000033863	XLOC_013605	exact match,XP_009291920.1,LOC101884166,uncharacterized LOC101884166, transcript variant X2	no Blast hit	3	no	keep	exact match BLAST hit with zebrafish protein
chr18	30077292	30077884	-	LL0000033864	XLOC_013608	moderate confidence,XP_021324159.1,LOC110438160,uncharacterized LOC110438160	low confidence,NP_004406.2,DSP,desmoplakin isoform I	1	no	keep	high/moderate confidence zebrafish BLAST hit
chr18	30080808	30081624	-	LL0000033865	XLOC_013609	high confidence,XP_021331295.1,LOC110439524,uncharacterized LOC110439524	no Blast hit	1	no	keep	high/moderate confidence zebrafish BLAST hit
chr18	30107240	30108196	-	LL0000033866	XLOC_013610	low confidence,NP_001106977.1,il12rb2,interleukin 12 receptor, beta 2a	no Blast hit	1	no	discard	single exon with low confidence or no Blast hit
chr18	31462792	31462845	-	LL0000033867	XLOC_013621	low confidence,XP_009295232.1,arhgef25a,Rho guanine nucleotide exchange factor (GEF) 25a, transcript variant X1	no Blast hit	1	no	discard	single exon with low confidence or no Blast hit
chr18	31474249	31477200	-	LL0000033868	XLOC_013622	low confidence,XP_021324313.1,ftr06,finTRIM family, member 6, transcript variant X1	low confidence,NP_001273466.1,C2orf49,ashwin isoform 2	1	no	discard	single exon with low confidence or no Blast hit
chr18	31480807	31481607	-	LL0000033869	XLOC_013623	no Blast hit	no Blast hit	1	no	discard	single exon with low confidence or no Blast hit
chr18	31531321	31540962	-	LL0000033870	XLOC_013624	high confidence,XP_021334690.1,LOC110440049,uncharacterized LOC110440049, transcript variant X2	moderate confidence,NP_079325.2,PIF1,ATP-dependent DNA helicase PIF1 isoform a	2	no	keep	high/moderate confidence zebrafish BLAST hit
chr18	31545596	31548407	-	LL0000033871	XLOC_013626	low confidence,XP_690811.2,polr3b,polymerase (RNA) III (DNA directed) polypeptide B	no Blast hit	1	no	discard	single exon with low confidence or no Blast hit
chr18	31548706	31550744	-	LL0000033872	XLOC_013627	low confidence,XP_021327306.1,LOC101886116,uncharacterized LOC101886116, transcript variant X6	no Blast hit	1	no	discard	single exon with low confidence or no Blast hit
chr18	31555328	31556640	-	LL0000033873	XLOC_013628	moderate confidence,XP_021326758.1,LOC110438542,uncharacterized LOC110438542	low confidence,NP_689585.3,MYOM3,myomesin-3	1	no	keep	high/moderate confidence zebrafish BLAST hit
chr18	31557416	31558431	-	LL0000033874	XLOC_013629	low confidence,XP_005165376.1,antxr2a,anthrax toxin receptor 2a, transcript variant X1	no Blast hit	1	no	discard	single exon with low confidence or no Blast hit
chr18	31558611	31559514	-	LL0000033875	XLOC_013630	low confidence,XP_005171188.1,zgc:63882,zgc:63882, transcript variant X1	no Blast hit	1	no	discard	single exon with low confidence or no Blast hit
chr18	31560762	31561990	-	LL0000033876	XLOC_013631	no Blast hit	no Blast hit	1	no	discard	single exon with low confidence or no Blast hit
chr18	31564756	31566310	-	LL0000033877	XLOC_013632	high confidence,XP_017212030.1,LOC100538256,uncharacterized LOC100538256, transcript variant X2	low confidence,XP_006723608.1,SIRPA,tyrosine-protein phosphatase non-receptor type substrate 1 isoform X3	1	no	keep	high/moderate confidence zebrafish BLAST hit
chr18	31850252	31852314	-	LL0000033878	XLOC_013633	low confidence,XP_021323083.1,LOC110438040,uncharacterized LOC110438040	low confidence,XP_011540167.1,MIER1,mesoderm induction early response protein 1 isoform X1	1	no	discard	single exon with low confidence or no Blast hit
chr18	31873555	31875212	-	LL0000033879	XLOC_013634	high confidence,XP_009300611.1,zmp:0000000634,zmp:0000000634	low confidence,XP_016873095.1,HARBI1,putative nuclease HARBI1 isoform X2	1	no	keep	high/moderate confidence zebrafish BLAST hit
chr18	32157541	32157987	-	LL0000033880	XLOC_013641	low confidence,NP_001103481.1,dock1,dedicator of cytokinesis 1	low confidence,NP_001371.1,DOCK1,dedicator of cytokinesis protein 1 isoform 2	1	no	discard	single exon with low confidence or no Blast hit
chr18	32169611	32171284	-	LL0000033881	XLOC_013643	high confidence,XP_021333025.1,LOC110439882,uncharacterized LOC110439882	low confidence,XP_024303002.1,C8orf33,UPF0488 protein C8orf33 isoform X1	2	no	keep	high/moderate confidence zebrafish BLAST hit
chr18	32284696	32285128	-	LL0000033882	XLOC_013644	no Blast hit	no Blast hit	1	no	discard	single exon with low confidence or no Blast hit
chr18	32289960	32292107	-	LL0000033883	XLOC_013645	low confidence,XP_021326182.1,ano10b,anoctamin 10b, transcript variant X1	no Blast hit	1	no	discard	single exon with low confidence or no Blast hit
chr18	32292877	32294908	-	LL0000033884	XLOC_013646	high confidence,XP_021334690.1,LOC110440049,uncharacterized LOC110440049, transcript variant X2	no Blast hit	1	no	keep	high/moderate confidence zebrafish BLAST hit
chr18	33602722	33603951	-	LL0000033885	XLOC_013658	low confidence,NP_001071220.1,zgc:123035,zgc:123035, transcript variant 2	no Blast hit	1	no	discard	single exon with low confidence or no Blast hit
chr18	33604891	33605511	-	LL0000033886	XLOC_013659	no Blast hit	no Blast hit	1	no	discard	single exon with low confidence or no Blast hit
chr18	35063301	35067898	-	LL0000033887	XLOC_013668	high confidence,XP_021324628.1,LOC110438216,uncharacterized LOC110438216, transcript variant X2	high confidence,NP_001128360.1,RTL1,retrotransposon-like protein 1	4	no	discard	identified as duplicate with existing V4.2/RefSeq annotation
chr18	35123988	35126395	-	LL0000033888	XLOC_013669	low confidence,XP_021327561.1,chd3,chromodomain helicase DNA binding protein 3, transcript variant X5	no Blast hit	1	no	discard	single exon with low confidence or no Blast hit
chr18	35162997	35164031	-	LL0000033889	XLOC_013670	no Blast hit	no Blast hit	1	no	discard	single exon with low confidence or no Blast hit
chr18	35164134	35167382	-	LL0000033890	XLOC_013671	low confidence,NP_001073652.2,zgc:158234,zgc:158234	low confidence,XP_005274725.1,IRAK1,interleukin-1 receptor-associated kinase 1 isoform X1	3	no	keep	more than one exon
chr18	35198497	35199817	-	LL0000033891	XLOC_013673	low confidence,XP_021332390.1,LOC100333801,myotubularin-related protein 3-like, transcript variant X2	no Blast hit	1	no	discard	single exon with low confidence or no Blast hit
chr18	35803104	35805467	-	LL0000033892	XLOC_013679	low confidence,XP_005166337.1,mpl,MPL proto-oncogene, thrombopoietin receptor, transcript variant X1	low confidence,XP_016869985.1,SETX,probable helicase senataxin isoform X5	1	no	discard	single exon with low confidence or no Blast hit
chr18	36926061	36932564	-	LL0000033893	XLOC_013689	low confidence,XP_017214110.1,LOC108191771,uncharacterized LOC108191771	low confidence,NP_001136248.2,CHAC1,glutathione-specific gamma-glutamylcyclotransferase 1 isoform b	3	no	keep	more than one exon
chr18	36942187	36943744	-	LL0000033894	XLOC_013690	no Blast hit	low confidence,NP_659412.3,SLFN5,schlafen family member 5 isoform 1	1	no	discard	single exon with low confidence or no Blast hit
chr18	39897564	39898930	-	LL0000033895	XLOC_013710	high confidence,XP_021331039.1,LOC110439392,uncharacterized LOC110439392	low confidence,NP_001265577.1,ZBTB48,telomere zinc finger-associated protein	2	no	keep	high/moderate confidence zebrafish BLAST hit
chr18	40246089	40247628	-	LL0000033896	XLOC_013711	moderate confidence,NP_001129452.1,zgc:194285,zgc:194285	no Blast hit	1	no	keep	high/moderate confidence zebrafish BLAST hit
chr18	41842680	41843390	-	LL0000033897	XLOC_013731	low confidence,NP_001119937.1,sort1b,sortilin 1b	no Blast hit	1	no	discard	single exon with low confidence or no Blast hit
chr18	44700518	44702120	-	LL0000033898	XLOC_013744	moderate confidence,XP_021324890.1,si:dkey-71d15.2,si:dkey-71d15.2, transcript variant X3	no Blast hit	1	no	keep	high/moderate confidence zebrafish BLAST hit
chr18	46693136	46697592	-	LL0000033899	XLOC_013764	no Blast hit	no Blast hit	1	no	discard	single exon with low confidence or no Blast hit
chr18	46809484	46809701	-	LL0000033900	XLOC_013766	low confidence,XP_009294370.1,sass6,SAS-6 centriolar assembly protein, transcript variant X2	no Blast hit	1	no	discard	single exon with low confidence or no Blast hit
chr18	46810666	46830010	-	LL0000033901	XLOC_013767	exact match,XP_001340996.1,LOC100000890,dapper homolog 3-like, transcript variant X1	low confidence,XP_016881823.1,DACT3,dapper homolog 3 isoform X1	5	no	discard	identified as duplicate with existing V4.2/RefSeq annotation
chr18	47515019	47516492	-	LL0000033902	XLOC_013772	no Blast hit	no Blast hit	1	no	discard	single exon with low confidence or no Blast hit
chr18	47517268	47520367	-	LL0000033903	XLOC_013773	low confidence,NP_001106978.1,il23r,interleukin 23 receptor	no Blast hit	1	no	discard	single exon with low confidence or no Blast hit
chr18	48355041	48370766	-	LL0000033904	XLOC_013776	no Blast hit	low confidence,XP_024308003.1,PARVB,beta-parvin isoform X1	3	no	keep	more than one exon
chr18	49118689	49119723	-	LL0000033905	XLOC_013785	no Blast hit	no Blast hit	1	no	discard	single exon with low confidence or no Blast hit
chr18	49597529	49598352	-	LL0000033906	XLOC_013788	low confidence,NP_001003597.1,mnd1,meiotic nuclear divisions 1 homolog (S. cerevisiae)	low confidence,NP_056071.2,ACSL6,long-chain-fatty-acid--CoA ligase 6 isoform a	1	no	discard	single exon with low confidence or no Blast hit
chr18	49668252	49668964	-	LL0000033907	XLOC_013789	low confidence,XP_021325486.1,tgm1l4,transglutaminase 1 like 4, transcript variant X2	low confidence,NP_001258463.1,DSCAM,Down syndrome cell adhesion molecule isoform 2 precursor	1	no	discard	single exon with low confidence or no Blast hit
chr19	37378	37853	+	LL0000033908	XLOC_013806	low confidence,XP_021331990.1,wdr19,WD repeat domain 19, transcript variant X1	no Blast hit	1	no	discard	single exon with low confidence or no Blast hit
chr19	116411	121934	+	LL0000033909	XLOC_013811	high confidence,XP_017207875.1,LOC101886447,ectonucleotide pyrophosphatase/phosphodiesterase family member 2-like	moderate confidence,NP_001124335.1,ENPP2,ectonucleotide pyrophosphatase/phosphodiesterase family member 2 isoform 3 preproprotein	2	no	keep	high/moderate confidence zebrafish BLAST hit
chr19	281353	283019	+	LL0000033910	XLOC_013818	low confidence,XP_021324841.1,LOC101882892,uncharacterized LOC101882892, transcript variant X1	low confidence,XP_016883386.1,UCKL1,uridine-cytidine kinase-like 1 isoform X18	1	no	discard	single exon with low confidence or no Blast hit
chr19	447898	448614	+	LL0000033911	XLOC_013827	low confidence,XP_021330832.1,LOC110439345,proline-rich protein 36-like	low confidence,XP_024306832.1,PLCH2,1-phosphatidylinositol 4,5-bisphosphate phosphodiesterase eta-2 isoform X10	1	no	discard	single exon with low confidence or no Blast hit
chr19	1324766	1325660	+	LL0000033912	XLOC_013843	low confidence,XP_001923761.1,tmem62,transmembrane protein 62, transcript variant X1	no Blast hit	1	no	discard	single exon with low confidence or no Blast hit
chr19	1566842	1568390	+	LL0000033913	XLOC_013850	low confidence,XP_021335702.1,pagr1,PAXIP1 associated glutamate-rich protein 1, transcript variant X1	no Blast hit	1	no	discard	single exon with low confidence or no Blast hit
chr19	1569045	1574435	+	LL0000033914	XLOC_013851	low confidence,XP_021334165.1,gpr153,G protein-coupled receptor 153, transcript variant X5	no Blast hit	1	no	discard	single exon with low confidence or no Blast hit
chr19	1574923	1575396	+	LL0000033915	XLOC_013852	no Blast hit	low confidence,NP_001156506.1,RPTOR,regulatory-associated protein of mTOR isoform 2	1	no	discard	single exon with low confidence or no Blast hit
chr19	1624809	1630107	+	LL0000033916	XLOC_013854	low confidence,XP_005169702.1,limk1a,LIM domain kinase 1a, transcript variant X2	no Blast hit	2	no	keep	more than one exon
chr19	2172408	2175182	+	LL0000033917	XLOC_013863	no Blast hit	no Blast hit	1	no	discard	single exon with low confidence or no Blast hit
chr19	2214511	2214802	+	LL0000033918	XLOC_013864	no Blast hit	no Blast hit	1	no	discard	single exon with low confidence or no Blast hit
chr19	4534317	4536356	+	LL0000033919	XLOC_013892	low confidence,XP_021326182.1,ano10b,anoctamin 10b, transcript variant X1	no Blast hit	1	no	discard	single exon with low confidence or no Blast hit
chr19	4537472	4538535	+	LL0000033920	XLOC_013893	no Blast hit	no Blast hit	1	no	discard	single exon with low confidence or no Blast hit
chr19	4572593	4572849	+	LL0000033921	XLOC_013895	low confidence,NP_001070758.1,khdrbs2,KH domain containing, RNA binding, signal transduction associated 2	low confidence,XP_011515099.1,KHDRBS3,KH domain-containing, RNA-binding, signal transduction-associated protein 3 isoform X2	1	no	discard	single exon with low confidence or no Blast hit
chr19	5625100	5628751	+	LL0000033922	XLOC_013913	no Blast hit	low confidence,NP_001277153.1,TPTE,putative tyrosine-protein phosphatase TPTE isoform delta	1	no	discard	single exon with low confidence or no Blast hit
chr19	5834487	5834960	+	LL0000033923	XLOC_013917	no Blast hit	low confidence,XP_016857404.1,POGK,pogo transposable element with KRAB domain isoform X3	1	no	discard	single exon with low confidence or no Blast hit
chr19	6885522	6887671	+	LL0000033924	XLOC_013920	high confidence,XP_021331015.1,LOC110439384,gastrula zinc finger protein XlCGF49.1-like	high confidence,NP_001307703.1,ZNF544,zinc finger protein 544 isoform 3	1	no	keep	high/moderate confidence zebrafish BLAST hit
chr19	7054751	7055514	+	LL0000033925	XLOC_013930	no Blast hit	no Blast hit	1	no	discard	single exon with low confidence or no Blast hit
chr19	7961244	7963412	+	LL0000033926	XLOC_013964	high confidence,XP_021327275.1,LOC103908724,uncharacterized LOC103908724	no Blast hit	1	no	keep	high/moderate confidence zebrafish BLAST hit
chr19	11851546	11853333	+	LL0000033927	XLOC_014020	low confidence,XP_021330692.1,pfkfb3,6-phosphofructo-2-kinase/fructose-2,6-biphosphatase 3, transcript variant X3	no Blast hit	1	no	discard	single exon with low confidence or no Blast hit
chr19	12439985	12440593	+	LL0000033928	XLOC_014028	low confidence,XP_009297833.1,syt17,synaptotagmin XVII, transcript variant X2	no Blast hit	1	no	discard	single exon with low confidence or no Blast hit
chr19	12813410	12814752	+	LL0000033929	XLOC_014032	moderate confidence,XP_021325841.1,cremb,cAMP responsive element modulator b, transcript variant X3	low confidence,NP_001158307.1,L1TD1,LINE-1 type transposase domain-containing protein 1	1	no	keep	high/moderate confidence zebrafish BLAST hit
chr19	12814828	12815841	+	LL0000033930	XLOC_014033	moderate confidence,XP_017206698.1,LOC101883768,uncharacterized LOC101883768	no Blast hit	1	no	keep	high/moderate confidence zebrafish BLAST hit
chr19	12817834	12818721	+	LL0000033931	XLOC_014034	low confidence,XP_001921968.4,LOC562630,anoctamin-9-like	no Blast hit	1	no	discard	single exon with low confidence or no Blast hit
chr19	13406966	13408262	+	LL0000033932	XLOC_014039	no Blast hit	low confidence,NP_001001570.1,PDE9A,high affinity cGMP-specific 3',5'-cyclic phosphodiesterase 9A isoform e	2	no	keep	high confidence BLAST hit to human protein
chr19	13986459	13987615	+	LL0000033933	XLOC_014046	low confidence,XP_021326182.1,ano10b,anoctamin 10b, transcript variant X1	no Blast hit	1	no	discard	single exon with low confidence or no Blast hit
chr19	13987770	13989457	+	LL0000033934	XLOC_014047	low confidence,XP_021326182.1,ano10b,anoctamin 10b, transcript variant X1	no Blast hit	1	no	discard	single exon with low confidence or no Blast hit
chr19	13989654	13990542	+	LL0000033935	XLOC_014048	low confidence,XP_021330700.1,tnnt2e,troponin T2e, cardiac, transcript variant X1	no Blast hit	1	no	discard	single exon with low confidence or no Blast hit
chr19	14039749	14042867	+	LL0000033936	XLOC_014050	no Blast hit	low confidence,NP_001354717.1,ATP6V0E2,V-type proton ATPase subunit e 2 isoform 4 precursor	1	no	discard	single exon with low confidence or no Blast hit
chr19	14042920	14045920	+	LL0000033937	XLOC_014051	low confidence,NP_001106978.1,il23r,interleukin 23 receptor	no Blast hit	1	no	discard	single exon with low confidence or no Blast hit
chr19	15026691	15027325	+	LL0000033938	XLOC_014063	low confidence,NP_997771.2,cdh15,cadherin 15, type 1, M-cadherin (myotubule)	low confidence,XP_016874666.1,FBXW8,F-box/WD repeat-containing protein 8 isoform X4	1	no	discard	single exon with low confidence or no Blast hit
chr19	16039984	16043967	+	LL0000033939	XLOC_014071	low confidence,XP_021335606.1,LOC101886098,Fc receptor-like protein 5, transcript variant X5	no Blast hit	1	no	discard	single exon with low confidence or no Blast hit
chr19	17075477	17077484	+	LL0000033940	XLOC_014079	high confidence,XP_021323947.1,LOC108180146,uncharacterized LOC108180146	no Blast hit	1	no	keep	high/moderate confidence zebrafish BLAST hit
chr19	17095649	17101431	+	LL0000033941	XLOC_014080	moderate confidence,XP_009304992.1,LOC101882900,uncharacterized LOC101882900	low confidence,XP_016883680.1,LOC107984104,uncharacterized protein LOC107984104	3	no	keep	high/moderate confidence zebrafish BLAST hit
chr19	17101905	17103956	+	LL0000033942	XLOC_014081	low confidence,NP_001268902.1,si:ch73-311h14.2,si:ch73-311h14.2	low confidence,NP_055693.4,PUM3,pumilio homolog 3	1	no	discard	single exon with low confidence or no Blast hit
chr19	17228894	17229479	+	LL0000033943	XLOC_014082	moderate confidence,XP_021335606.1,LOC101886098,Fc receptor-like protein 5, transcript variant X5	low confidence,NP_001138842.1,PTPN3,tyrosine-protein phosphatase non-receptor type 3 isoform 4	1	no	keep	high/moderate confidence zebrafish BLAST hit
chr19	18017051	18018095	+	LL0000033944	XLOC_014090	no Blast hit	no Blast hit	1	no	discard	single exon with low confidence or no Blast hit
chr19	18028088	18028694	+	LL0000033945	XLOC_014091	low confidence,XP_009297813.1,ptprb,protein tyrosine phosphatase, receptor type, b, transcript variant X3	low confidence,XP_016881773.1,TMIGD2,transmembrane and immunoglobulin domain-containing protein 2 isoform X1	1	no	discard	single exon with low confidence or no Blast hit
chr19	18066073	18070349	+	LL0000033946	XLOC_014092	low confidence,NP_001071220.1,zgc:123035,zgc:123035, transcript variant 2	no Blast hit	1	no	discard	single exon with low confidence or no Blast hit
chr19	18091838	18099156	+	LL0000033947	XLOC_014093	low confidence,XP_021331065.1,LOC108183474,proline and serine-rich protein 1-like	no Blast hit	2	no	keep	more than one exon
chr19	18099278	18100060	+	LL0000033948	XLOC_014094	low confidence,NP_001122205.1,syt12,synaptotagmin XII	no Blast hit	1	no	discard	single exon with low confidence or no Blast hit
chr19	18286361	18286772	+	LL0000033949	XLOC_014095	no Blast hit	low confidence,XP_024306170.1,SLC5A2,sodium/glucose cotransporter 2 isoform X2	1	no	discard	single exon with low confidence or no Blast hit
chr19	18653494	18655339	+	LL0000033950	XLOC_014101	no Blast hit	no Blast hit	1	no	discard	single exon with low confidence or no Blast hit
chr19	18684121	18736319	+	LL0000033951	XLOC_014102	high confidence,XP_021331039.1,LOC110439392,uncharacterized LOC110439392	low confidence,XP_011523051.1,ITGA2B,integrin alpha-IIb isoform X1	4	no	keep	high/moderate confidence zebrafish BLAST hit
chr19	19177458	19180937	+	LL0000033952	XLOC_014111	no Blast hit	no Blast hit	1	no	discard	single exon with low confidence or no Blast hit
chr19	19436485	19437611	+	LL0000033953	XLOC_014118	low confidence,NP_001071014.1,slc20a2,solute carrier family 20 (phosphate transporter), member 2	no Blast hit	1	no	discard	single exon with low confidence or no Blast hit
chr19	20657391	20658741	+	LL0000033954	XLOC_014136	no Blast hit	no Blast hit	1	no	discard	single exon with low confidence or no Blast hit
chr19	20658850	20662825	+	LL0000033955	XLOC_014137	low confidence,NP_001038409.1,jtb,jumping translocation breakpoint	no Blast hit	1	no	discard	single exon with low confidence or no Blast hit
chr19	20900263	20901335	+	LL0000033956	XLOC_014146	high confidence,XP_021323131.1,LOC110438047,uncharacterized LOC110438047	high confidence,XP_016865088.1,GIN1,gypsy retrotransposon integrase-like protein 1 isoform X1	1	no	keep	high/moderate confidence zebrafish BLAST hit
chr19	20940341	20944671	+	LL0000033957	XLOC_014147	low confidence,XP_021333058.1,LOC101883618,uncharacterized protein PF11_0213-like	no Blast hit	2	no	keep	more than one exon
chr19	21613382	21614282	+	LL0000033958	XLOC_014149	low confidence,XP_021333058.1,LOC101883618,uncharacterized protein PF11_0213-like	low confidence,NP_001316662.1,ZNF496,zinc finger protein 496 isoform 2	1	no	discard	single exon with low confidence or no Blast hit
chr19	21911980	21912439	+	LL0000033959	XLOC_014151	no Blast hit	no Blast hit	1	no	discard	single exon with low confidence or no Blast hit
chr19	22020688	22024721	+	LL0000033960	XLOC_014155	low confidence,XP_001344635.2,LOC100005637,uncharacterized LOC100005637	no Blast hit	5	no	keep	more than one exon
chr19	23283395	23286521	+	LL0000033961	XLOC_014173	high confidence,XP_021323503.1,LOC108180016,zinc finger BED domain-containing protein 1-like	moderate confidence,NP_004720.1,ZBED1,zinc finger BED domain-containing protein 1	2	no	keep	high/moderate confidence zebrafish BLAST hit
chr19	23543949	23544437	+	LL0000033962	XLOC_014175	low confidence,NP_001002104.1,lysmd3,LysM, putative peptidoglycan-binding, domain containing 3	low confidence,NP_001278347.1,KDM6A,lysine-specific demethylase 6A isoform 5	2	no	keep	more than one exon
chr19	23665567	23665999	+	LL0000033963	XLOC_014178	no Blast hit	no Blast hit	1	no	discard	single exon with low confidence or no Blast hit
chr19	24093076	24093787	+	LL0000033964	XLOC_014186	low confidence,XP_009303624.1,ccdc83,coiled-coil domain containing 83, transcript variant X2	no Blast hit	2	no	keep	more than one exon
chr19	24231255	24233863	+	LL0000033965	XLOC_014188	high confidence,XP_021331336.1,LOC101886601,uncharacterized LOC101886601, transcript variant X2	moderate confidence,XP_016865088.1,GIN1,gypsy retrotransposon integrase-like protein 1 isoform X1	1	no	keep	high/moderate confidence zebrafish BLAST hit
chr19	24406091	24414575	+	LL0000033966	XLOC_014193	no Blast hit	no Blast hit	2	no	keep	more than one exon
chr19	25619658	25621025	+	LL0000033967	XLOC_014208	low confidence,XP_021330274.1,si:ch73-194h10.3,si:ch73-194h10.3	low confidence,NP_056243.1,ZNF473,zinc finger protein 473 isoform 1	1	no	discard	single exon with low confidence or no Blast hit
chr19	26847871	26848918	+	LL0000033968	XLOC_014219	low confidence,XP_699818.6,zbtb40,zinc finger and BTB domain containing 40, transcript variant X2	low confidence,NP_001431.1,EXTL3,exostosin-like 3	1	no	discard	single exon with low confidence or no Blast hit
chr19	27947331	27949677	+	LL0000033969	XLOC_014227	no Blast hit	no Blast hit	1	no	discard	single exon with low confidence or no Blast hit
chr19	29459144	29601274	+	LL0000033970	XLOC_014238	low confidence,NP_957437.2,pik3r3b,phosphoinositide-3-kinase, regulatory subunit 3b (gamma)	low confidence,XP_011516381.1,MELK,maternal embryonic leucine zipper kinase isoform X1	5	no	keep	more than one exon
chr19	29791460	29793126	+	LL0000033971	XLOC_014239	no Blast hit	no Blast hit	1	no	discard	single exon with low confidence or no Blast hit
chr19	29795565	29797658	+	LL0000033972	XLOC_014240	low confidence,NP_001121732.1,cdk14,cyclin-dependent kinase 14	no Blast hit	1	no	discard	single exon with low confidence or no Blast hit
chr19	31859935	31865015	+	LL0000033973	XLOC_014266	low confidence,NP_001038409.1,jtb,jumping translocation breakpoint	no Blast hit	4	no	discard	identified as duplicate with existing V4.2/RefSeq annotation
chr19	34683760	34685630	+	LL0000033974	XLOC_014295	low confidence,XP_009303149.2,erbb4b,erb-b2 receptor tyrosine kinase 4b	no Blast hit	1	no	discard	single exon with low confidence or no Blast hit
chr19	35894249	35894899	+	LL0000033975	XLOC_014304	low confidence,XP_009303624.1,ccdc83,coiled-coil domain containing 83, transcript variant X2	no Blast hit	1	no	discard	single exon with low confidence or no Blast hit
chr19	38138717	38147774	+	LL0000033976	XLOC_014317	no Blast hit	low confidence,NP_001303929.1,NLRP8,NACHT, LRR and PYD domains-containing protein 8 isoform 2	4	no	discard	identified as duplicate with existing V4.2/RefSeq annotation
chr19	39418784	39419757	+	LL0000033977	XLOC_014325	low confidence,XP_005166337.1,mpl,MPL proto-oncogene, thrombopoietin receptor, transcript variant X1	no Blast hit	1	no	discard	single exon with low confidence or no Blast hit
chr19	39995501	39997767	+	LL0000033978	XLOC_014328	low confidence,XP_003198845.1,si:ch73-194h10.3,si:ch73-194h10.3	no Blast hit	1	no	discard	single exon with low confidence or no Blast hit
chr19	40328752	40332839	+	LL0000033979	XLOC_014336	low confidence,NP_001108612.1,ppp4r2a,protein phosphatase 4, regulatory subunit 2a	no Blast hit	2	no	keep	more than one exon
chr19	41282796	41283965	+	LL0000033980	XLOC_014349	moderate confidence,XP_021326617.1,LOC798868,cytoplasmic dynein 1 intermediate chain 1-like	low confidence,NP_001265350.1,DYNC1I1,cytoplasmic dynein 1 intermediate chain 1 isoform d	1	no	keep	high/moderate confidence zebrafish BLAST hit
chr19	41284080	41286779	+	LL0000033981	XLOC_014350	low confidence,XP_021328569.1,LOC110438995,integrin alpha-6-like, transcript variant X2	low confidence,NP_006724.2,CENPI,centromere protein I isoform 1	1	no	discard	single exon with low confidence or no Blast hit
chr19	41653567	41655018	+	LL0000033982	XLOC_014357	no Blast hit	low confidence,NP_065816.2,UBR4,E3 ubiquitin-protein ligase UBR4	1	no	discard	single exon with low confidence or no Blast hit
chr19	41655381	41656976	+	LL0000033983	XLOC_014358	no Blast hit	no Blast hit	1	no	discard	single exon with low confidence or no Blast hit
chr19	41657102	41661611	+	LL0000033984	XLOC_014359	no Blast hit	no Blast hit	1	no	discard	single exon with low confidence or no Blast hit
chr19	41731027	41732251	+	LL0000033985	XLOC_014360	no Blast hit	no Blast hit	1	no	discard	single exon with low confidence or no Blast hit
chr19	42685063	42688565	+	LL0000033986	XLOC_014378	low confidence,XP_005174618.4,LOC101882453,LIM and calponin homology domains-containing protein 1-like	no Blast hit	3	no	keep	more than one exon
chr19	43154900	43156619	+	LL0000033987	XLOC_014394	low confidence,XP_021333744.1,zmp:0000001168,zmp:0000001168, transcript variant X3	no Blast hit	1	no	discard	single exon with low confidence or no Blast hit
chr19	43163831	43166338	+	LL0000033988	XLOC_014395	low confidence,NP_001025454.1,ldlra,low density lipoprotein receptor a	low confidence,NP_001335176.1,AIM2,interferon-inducible protein AIM2 isoform 2	1	no	discard	single exon with low confidence or no Blast hit
chr19	43274478	43282749	+	LL0000033989	XLOC_014397	low confidence,NP_001025454.1,ldlra,low density lipoprotein receptor a	no Blast hit	2	no	keep	more than one exon
chr19	43286637	43289064	+	LL0000033990	XLOC_014398	high confidence,XP_021326514.1,LOC110438429,uncharacterized LOC110438429	no Blast hit	2	no	keep	high/moderate confidence zebrafish BLAST hit
chr19	43849702	43853598	+	LL0000033991	XLOC_014416	moderate confidence,XP_009302434.2,LOC101882501,SET domain-containing protein 5-like	low confidence,NP_001354318.1,KMT5A,N-lysine methyltransferase KMT5A isoform 4	8	no	discard	identified as duplicate with existing V4.2/RefSeq annotation
chr19	45359287	45365717	+	LL0000033992	XLOC_014427	low confidence,XP_005167446.1,map3k12,mitogen-activated protein kinase kinase kinase 12, transcript variant X1	no Blast hit	2	no	keep	more than one exon
chr19	45367877	45369117	+	LL0000033993	XLOC_014428	no Blast hit	no Blast hit	1	no	discard	single exon with low confidence or no Blast hit
chr19	46103875	46105120	+	LL0000033994	XLOC_014434	low confidence,XP_021332389.1,LOC568486,regulating synaptic membrane exocytosis protein 1, transcript variant X1	no Blast hit	1	no	discard	single exon with low confidence or no Blast hit
chr19	46105294	46106544	+	LL0000033995	XLOC_014435	no Blast hit	no Blast hit	1	no	discard	single exon with low confidence or no Blast hit
chr19	46213013	46216203	+	LL0000033996	XLOC_014438	low confidence,XP_002662346.1,si:dkey-34m19.3,si:dkey-34m19.3, transcript variant X1	no Blast hit	1	no	discard	single exon with low confidence or no Blast hit
chr19	46305826	46306744	+	LL0000033997	XLOC_014441	no Blast hit	no Blast hit	1	no	discard	single exon with low confidence or no Blast hit
chr19	47004625	47005010	+	LL0000033998	XLOC_014446	no Blast hit	no Blast hit	1	no	discard	single exon with low confidence or no Blast hit
chr19	47074944	47075003	+	LL0000033999	XLOC_014447	low confidence,XP_017212006.1,kalrnb,kalirin RhoGEF kinase b, transcript variant X1	no Blast hit	1	no	discard	single exon with low confidence or no Blast hit
chr19	47386689	47387705	+	LL0000034000	XLOC_014453	low confidence,NP_956428.1,ccz1,CCZ1 homolog, vacuolar protein trafficking and biogenesis associated	low confidence,NP_056437.4,CCZ1,vacuolar fusion protein CCZ1 homolog	1	no	discard	single exon with low confidence or no Blast hit
chr19	47936050	47940908	+	LL0000034001	XLOC_014460	exact match,XP_009299567.1,c19h1orf216,chromosome 19 C1orf216 homolog	moderate confidence,NP_689587.1,C1orf216,UPF0500 protein C1orf216	2	no	keep	moderate confidence BLAST hit to human protein
chr19	48040146	48043615	+	LL0000034002	XLOC_014466	moderate confidence,NP_001025454.1,ldlra,low density lipoprotein receptor a	no Blast hit	1	no	keep	high/moderate confidence zebrafish BLAST hit
chr19	48073448	48075414	+	LL0000034003	XLOC_014469	low confidence,XP_021330274.1,si:ch73-194h10.3,si:ch73-194h10.3	no Blast hit	1	no	discard	single exon with low confidence or no Blast hit
chr19	48093840	48099277	+	LL0000034004	XLOC_014470	high confidence,XP_021323869.1,tnxb,tenascin XB	high confidence,NP_115859.2,TNXB,tenascin-X isoform 2	11	no	keep	high/moderate confidence zebrafish BLAST hit
chr19	48187183	48190924	+	LL0000034005	XLOC_014477	low confidence,XP_021335606.1,LOC101886098,Fc receptor-like protein 5, transcript variant X5	no Blast hit	2	no	keep	more than one exon
chr19	17	3818	-	LL0000034006	XLOC_014485	no Blast hit	no Blast hit	3	no	keep	more than one exon
chr19	3922	5311	-	LL0000034007	XLOC_014486	low confidence,XP_017207335.1,zdhhc22,zinc finger, DHHC-type containing 22, transcript variant X2	no Blast hit	2	no	keep	more than one exon
chr19	5766	6467	-	LL0000034008	XLOC_014487	low confidence,XP_021323875.1,LOC100331704,collagen alpha-1(XIV) chain	low confidence,NP_116053.3,FUT10,alpha-(1,3)-fucosyltransferase 10	1	no	discard	single exon with low confidence or no Blast hit
chr19	7208	10955	-	LL0000034009	XLOC_014488	high confidence,XP_017207893.2,LOC100331367,lysine-specific histone demethylase 1B-like	high confidence,NP_001351543.1,KDM1B,lysine-specific histone demethylase 1B 1	12	no	keep	high/moderate confidence zebrafish BLAST hit
chr19	7693	8171	-	LL0000034010	XLOC_014489	no Blast hit	no Blast hit	1	no	discard	single exon with low confidence or no Blast hit
chr19	11247	12535	-	LL0000034011	XLOC_014490	no Blast hit	moderate confidence,XP_016865931.1,KDM1B,lysine-specific histone demethylase 1B isoform X5	1	no	keep	moderate confidence BLAST hit to human protein
chr19	286051	287852	-	LL0000034012	XLOC_014496	no Blast hit	no Blast hit	1	no	discard	single exon with low confidence or no Blast hit
chr19	1066714	1068207	-	LL0000034013	XLOC_014516	low confidence,NP_001074122.1,bckdhb,branched chain keto acid dehydrogenase E1, beta polypeptide	low confidence,NP_001305904.1,BCKDHB,2-oxoisovalerate dehydrogenase subunit beta, mitochondrial isoform 2	1	no	discard	single exon with low confidence or no Blast hit
chr19	1484075	1485622	-	LL0000034014	XLOC_014521	low confidence,XP_021325943.1,kmt2ca,lysine (K)-specific methyltransferase 2Ca, transcript variant X7	no Blast hit	1	no	discard	single exon with low confidence or no Blast hit
chr19	1949174	1949750	-	LL0000034015	XLOC_014527	no Blast hit	no Blast hit	1	no	discard	single exon with low confidence or no Blast hit
chr19	2009495	2017922	-	LL0000034016	XLOC_014530	high confidence,XP_009299444.2,LOC100535451,serine/threonine-protein phosphatase 6 regulatory ankyrin repeat subunit A	high confidence,XP_016861518.1,ANKRD28,serine/threonine-protein phosphatase 6 regulatory ankyrin repeat subunit A isoform X7	7	no	keep	high/moderate confidence zebrafish BLAST hit
chr19	2208331	2221994	-	LL0000034017	XLOC_014532	no Blast hit	low confidence,NP_071351.2,PIEZO2,piezo-type mechanosensitive ion channel component 2	2	no	keep	more than one exon
chr19	3529172	3533146	-	LL0000034018	XLOC_014561	low confidence,XP_021322010.1,p4ha3,prolyl 4-hydroxylase, alpha polypeptide III, transcript variant X5	no Blast hit	1	no	discard	single exon with low confidence or no Blast hit
chr19	4650860	4653269	-	LL0000034019	XLOC_014580	low confidence,XP_021328754.1,rab32b,RAB32b, member RAS oncogene family, transcript variant X1	no Blast hit	1	no	discard	single exon with low confidence or no Blast hit
chr19	4686100	4686542	-	LL0000034020	XLOC_014581	low confidence,NP_001070758.1,khdrbs2,KH domain containing, RNA binding, signal transduction associated 2	low confidence,XP_011533817.1,KHDRBS2,KH domain-containing, RNA-binding, signal transduction-associated protein 2 isoform X6	1	no	discard	single exon with low confidence or no Blast hit
chr19	4745319	4755257	-	LL0000034021	XLOC_014583	high confidence,XP_002667882.1,st3gal1l2,ST3 beta-galactoside alpha-2,3-sialyltransferase 1, like 2, transcript variant X1	high confidence,NP_008858.1,ST3GAL2,CMP-N-acetylneuraminate-beta-galactosamide-alpha-2,3-sialyltransferase 2	6	no	discard	identified as duplicate with existing V4.2/RefSeq annotation
chr19	4818842	4825316	-	LL0000034022	XLOC_014585	low confidence,XP_021326182.1,ano10b,anoctamin 10b, transcript variant X1	no Blast hit	4	no	keep	more than one exon
chr19	6563058	6568055	-	LL0000034023	XLOC_014614	low confidence,NP_001116088.1,zgc:171435,zgc:171435	no Blast hit	1	no	discard	single exon with low confidence or no Blast hit
chr19	7979710	7980784	-	LL0000034024	XLOC_014641	low confidence,XP_021335354.1,lrp1aa,low density lipoprotein receptor-related protein 1Aa	no Blast hit	1	no	discard	single exon with low confidence or no Blast hit
chr19	8075697	8079959	-	LL0000034025	XLOC_014642	low confidence,XP_021335606.1,LOC101886098,Fc receptor-like protein 5, transcript variant X5	no Blast hit	1	no	discard	single exon with low confidence or no Blast hit
chr19	8673778	8677875	-	LL0000034026	XLOC_014647	no Blast hit	no Blast hit	1	no	discard	single exon with low confidence or no Blast hit
chr19	8882349	8883603	-	LL0000034027	XLOC_014653	no Blast hit	no Blast hit	1	no	discard	single exon with low confidence or no Blast hit
chr19	9107546	9111508	-	LL0000034028	XLOC_014659	low confidence,XP_009303624.1,ccdc83,coiled-coil domain containing 83, transcript variant X2	no Blast hit	2	no	keep	more than one exon
chr19	9507977	9509866	-	LL0000034029	XLOC_014664	low confidence,XP_021329215.1,LOC110439112,stonustoxin subunit beta-like	low confidence,NP_996776.2,MS4A10,membrane-spanning 4-domains subfamily A member 10	1	no	discard	single exon with low confidence or no Blast hit
chr19	11240005	11244795	-	LL0000034030	XLOC_014707	high confidence,XP_001338197.4,irgf3,immunity-related GTPase family, f3	low confidence,XP_006723346.1,IRGC,interferon-inducible GTPase 5 isoform X2	3	no	keep	high/moderate confidence zebrafish BLAST hit
chr19	11628314	11629933	-	LL0000034031	XLOC_014713	low confidence,XP_021334146.1,LOC110440016,adhesion G-protein coupled receptor F1-like	no Blast hit	1	no	discard	single exon with low confidence or no Blast hit
chr19	12625766	12626602	-	LL0000034032	XLOC_014728	low confidence,XP_021330274.1,si:ch73-194h10.3,si:ch73-194h10.3	low confidence,XP_011524100.1,ESCO1,N-acetyltransferase ESCO1 isoform X1	1	no	discard	single exon with low confidence or no Blast hit
chr19	12694216	12695467	-	LL0000034033	XLOC_014731	no Blast hit	no Blast hit	1	no	discard	single exon with low confidence or no Blast hit
chr19	12695731	12698186	-	LL0000034034	XLOC_014732	high confidence,XP_009304992.1,LOC101882900,uncharacterized LOC101882900	low confidence,XP_016870445.1,PTPN3,tyrosine-protein phosphatase non-receptor type 3 isoform X7	3	no	keep	high/moderate confidence zebrafish BLAST hit
chr19	12704282	12705513	-	LL0000034035	XLOC_014733	high confidence,XP_005171012.1,LOC101883163,uncharacterized LOC101883163	no Blast hit	1	no	keep	high/moderate confidence zebrafish BLAST hit
chr19	13327216	13329468	-	LL0000034036	XLOC_014736	low confidence,XP_021325075.1,znf1157,zinc finger protein 1157, transcript variant X4	no Blast hit	4	no	keep	more than one exon
chr19	14488823	14497541	-	LL0000034037	XLOC_014747	low confidence,NP_001038409.1,jtb,jumping translocation breakpoint	no Blast hit	3	no	keep	more than one exon
chr19	14494352	14496048	-	LL0000034038	XLOC_014748	no Blast hit	low confidence,NP_060960.2,LGR4,leucine-rich repeat-containing G-protein coupled receptor 4 isoform 1 precursor	1	no	discard	single exon with low confidence or no Blast hit
chr19	14498079	14504119	-	LL0000034039	XLOC_014749	exact match,XP_005174467.2,LOC100334495,uncharacterized LOC100334495	no Blast hit	4	no	keep	exact match BLAST hit with zebrafish protein
chr19	15301748	15304150	-	LL0000034040	XLOC_014755	no Blast hit	no Blast hit	2	no	keep	more than one exon
chr19	16823470	16824210	-	LL0000034041	XLOC_014766	no Blast hit	low confidence,XP_024304602.1,GTSF1,gametocyte-specific factor 1 isoform X1	1	no	discard	single exon with low confidence or no Blast hit
chr19	16938537	16943623	-	LL0000034042	XLOC_014767	high confidence,XP_021333806.1,lrfn4b,leucine rich repeat and fibronectin type III domain containing 4b, transcript variant X1	low confidence,NP_116036.1,CBX2,chromobox protein homolog 2 isoform 2	2	no	keep	high/moderate confidence zebrafish BLAST hit
chr19	17110054	17112101	-	LL0000034043	XLOC_014769	low confidence,NP_001076334.1,si:ch211-262h13.3,si:ch211-262h13.3	no Blast hit	3	no	keep	more than one exon
chr19	17112205	17114667	-	LL0000034044	XLOC_014770	low confidence,XP_001344635.2,LOC100005637,uncharacterized LOC100005637	low confidence,NP_001092759.1,SH3RF3,E3 ubiquitin-protein ligase SH3RF3 precursor	2	no	keep	more than one exon
chr19	17328831	17333981	-	LL0000034045	XLOC_014774	high confidence,XP_021332953.1,LOC110439877,uncharacterized LOC110439877, transcript variant X1	low confidence,NP_004409.1,DUSP2,dual specificity protein phosphatase 2	1	no	keep	high/moderate confidence zebrafish BLAST hit
chr19	17681744	17686923	-	LL0000034046	XLOC_014778	moderate confidence,NP_001164503.1,si:rp71-36n21.1,si:rp71-36n21.1	low confidence,NP_006750.3,UGP2,UTP--glucose-1-phosphate uridylyltransferase isoform a	3	no	keep	high/moderate confidence zebrafish BLAST hit
chr19	18020824	18021768	-	LL0000034047	XLOC_014781	low confidence,NP_001177238.1,itga3b,integrin, alpha 3b	no Blast hit	1	no	discard	single exon with low confidence or no Blast hit
chr19	18094549	18096562	-	LL0000034048	XLOC_014782	no Blast hit	no Blast hit	2	no	keep	more than one exon
chr19	18289359	18293194	-	LL0000034049	XLOC_014787	high confidence,XP_021329428.1,LOC110439125,uncharacterized LOC110439125	no Blast hit	1	no	keep	high/moderate confidence zebrafish BLAST hit
chr19	18297925	18298732	-	LL0000034050	XLOC_014788	no Blast hit	no Blast hit	1	no	discard	single exon with low confidence or no Blast hit
chr19	18298866	18299382	-	LL0000034051	XLOC_014789	low confidence,XP_021333439.1,slc16a13,solute carrier family 16, member 13 (monocarboxylic acid transporter 13), transcript variant X1	no Blast hit	1	no	discard	single exon with low confidence or no Blast hit
chr19	18299485	18300410	-	LL0000034052	XLOC_014790	low confidence,XP_009296319.1,si:dkey-217l24.1,si:dkey-217l24.1, transcript variant X2	low confidence,XP_016866185.1,SHPRH,E3 ubiquitin-protein ligase SHPRH isoform X8	1	no	discard	single exon with low confidence or no Blast hit
chr19	18709259	18710533	-	LL0000034053	XLOC_014803	no Blast hit	no Blast hit	1	no	discard	single exon with low confidence or no Blast hit
chr19	18889161	18891084	-	LL0000034054	XLOC_014810	low confidence,XP_009296996.1,LOC103910101,antifreeze protein Maxi-like	low confidence,NP_149443.1,KRTAP4-3,keratin-associated protein 4-3	1	no	discard	single exon with low confidence or no Blast hit
chr19	19457576	19458386	-	LL0000034055	XLOC_014817	no Blast hit	no Blast hit	1	no	discard	single exon with low confidence or no Blast hit
chr19	20127771	20132934	-	LL0000034056	XLOC_014827	high confidence,XP_021333025.1,LOC110439882,uncharacterized LOC110439882	low confidence,XP_011512765.1,ZNF451,E3 SUMO-protein ligase ZNF451 isoform X5	1	no	keep	high/moderate confidence zebrafish BLAST hit
chr19	20895426	20896419	-	LL0000034057	XLOC_014840	high confidence,XP_021323438.1,LOC110438084,uncharacterized LOC110438084	low confidence,NP_671714.1,AKAP9,A-kinase anchor protein 9 isoform 3	1	no	keep	high/moderate confidence zebrafish BLAST hit
chr19	20914982	20916909	-	LL0000034058	XLOC_014841	no Blast hit	no Blast hit	1	no	discard	single exon with low confidence or no Blast hit
chr19	20917029	20917781	-	LL0000034059	XLOC_014842	no Blast hit	no Blast hit	1	no	discard	single exon with low confidence or no Blast hit
chr19	20918535	20921734	-	LL0000034060	XLOC_014843	no Blast hit	no Blast hit	1	no	discard	single exon with low confidence or no Blast hit
chr19	21693582	21695181	-	LL0000034061	XLOC_014847	low confidence,XP_021330055.1,LOC110439213,glutamate receptor ionotropic, delta-1-like	low confidence,NP_612195.1,PCSK6,proprotein convertase subtilisin/kexin type 6 isoform PACE4B preproprotein	1	no	discard	single exon with low confidence or no Blast hit
chr19	22034194	22039570	-	LL0000034062	XLOC_014851	no Blast hit	low confidence,XP_011537974.1,FUOM,fucose mutarotase isoform X3	2	no	keep	more than one exon
chr19	22308362	22309561	-	LL0000034063	XLOC_014852	low confidence,XP_009291080.1,si:ch73-242m19.1,si:ch73-242m19.1, transcript variant X1	no Blast hit	1	no	discard	single exon with low confidence or no Blast hit
chr19	22313528	22315542	-	LL0000034064	XLOC_014853	low confidence,XP_021323314.1,def8,differentially expressed in FDCP 8 homolog (mouse), transcript variant X2	no Blast hit	1	no	discard	single exon with low confidence or no Blast hit
chr19	22389997	22391632	-	LL0000034065	XLOC_014857	low confidence,NP_001002322.1,slc30a5,solute carrier family 30 (zinc transporter), member 5	no Blast hit	1	no	discard	single exon with low confidence or no Blast hit
chr19	22692678	22698301	-	LL0000034066	XLOC_014861	exact match,XP_021323989.1,LOC100537369,transmembrane protein 74-like, transcript variant X2	high confidence,NP_694560.1,TMEM74,transmembrane protein 74	2	no	discard	identified as duplicate with existing V4.2/RefSeq annotation
chr19	23103111	23103679	-	LL0000034067	XLOC_014870	no Blast hit	no Blast hit	1	no	discard	single exon with low confidence or no Blast hit
chr19	23130573	23133056	-	LL0000034068	XLOC_014874	low confidence,XP_021333058.1,LOC101883618,uncharacterized protein PF11_0213-like	no Blast hit	1	no	discard	single exon with low confidence or no Blast hit
chr19	23631582	23633903	-	LL0000034069	XLOC_014886	low confidence,XP_009297997.1,LOC793338,uncharacterized LOC793338, transcript variant X2	no Blast hit	5	no	keep	more than one exon
chr19	23698702	23701472	-	LL0000034070	XLOC_014889	low confidence,XP_001344635.2,LOC100005637,uncharacterized LOC100005637	no Blast hit	5	no	keep	more than one exon
chr19	24298900	24303968	-	LL0000034071	XLOC_014911	high confidence,XP_017207905.1,LOC101887104,uncharacterized LOC101887104	low confidence,XP_016860310.1,TTN,titin isoform X5	8	no	keep	high/moderate confidence zebrafish BLAST hit
chr19	25044221	25045007	-	LL0000034072	XLOC_014922	low confidence,NP_571887.1,cx55.5,connexin 55.5	no Blast hit	1	no	discard	single exon with low confidence or no Blast hit
chr19	25065787	25068222	-	LL0000034073	XLOC_014924	moderate confidence,XP_009289536.1,si:ch211-276i12.9,si:ch211-276i12.9	no Blast hit	1	no	keep	high/moderate confidence zebrafish BLAST hit
chr19	26675961	26677392	-	LL0000034074	XLOC_014938	low confidence,NP_001082891.1,c2cd4a,C2 calcium dependent domain containing 4A	low confidence,NP_001129735.1,C2CD4C,C2 calcium-dependent domain-containing protein 4C	1	no	discard	single exon with low confidence or no Blast hit
chr19	26783407	26784889	-	LL0000034075	XLOC_014941	low confidence,XP_009293049.1,ryr3,ryanodine receptor 3, transcript variant X2	no Blast hit	1	no	discard	single exon with low confidence or no Blast hit
chr19	27029784	27031251	-	LL0000034076	XLOC_014947	low confidence,XP_021335606.1,LOC101886098,Fc receptor-like protein 5, transcript variant X5	no Blast hit	1	no	discard	single exon with low confidence or no Blast hit
chr19	27472056	27474969	-	LL0000034077	XLOC_014955	high confidence,XP_021334421.1,il1rapl1a,interleukin 1 receptor accessory protein-like 1a, transcript variant X6	moderate confidence,XP_016865088.1,GIN1,gypsy retrotransposon integrase-like protein 1 isoform X1	1	no	keep	high/moderate confidence zebrafish BLAST hit
chr19	27475732	27479223	-	LL0000034078	XLOC_014956	high confidence,XP_021323977.1,LOC110438141,uncharacterized LOC110438141	no Blast hit	1	no	keep	high/moderate confidence zebrafish BLAST hit
chr19	27518921	27520195	-	LL0000034079	XLOC_014957	no Blast hit	low confidence,NP_001357389.1,GLB1L2,beta-galactosidase-1-like protein 2 isoform a	1	no	discard	single exon with low confidence or no Blast hit
chr19	27949167	27950851	-	LL0000034080	XLOC_014968	low confidence,NP_001025454.1,ldlra,low density lipoprotein receptor a	no Blast hit	1	no	discard	single exon with low confidence or no Blast hit
chr19	28640591	28647315	-	LL0000034081	XLOC_014974	exact match,XP_021323830.1,LOC108180169,uncharacterized LOC108180169, transcript variant X3	no Blast hit	7	no	keep	exact match BLAST hit with zebrafish protein
chr19	30470994	30472040	-	LL0000034082	XLOC_014989	no Blast hit	no Blast hit	1	no	discard	single exon with low confidence or no Blast hit
chr19	31072266	31072921	-	LL0000034083	XLOC_014997	low confidence,XP_021326182.1,ano10b,anoctamin 10b, transcript variant X1	no Blast hit	1	no	discard	single exon with low confidence or no Blast hit
chr19	34138480	34138875	-	LL0000034084	XLOC_015039	low confidence,NP_775352.2,vps18,vacuolar protein sorting 18 homolog (S. cerevisiae)	no Blast hit	1	no	discard	single exon with low confidence or no Blast hit
chr19	35614873	35622088	-	LL0000034085	XLOC_015057	exact match,XP_005159729.1,LOC101883771,uncharacterized LOC101883771, transcript variant X1	low confidence,XP_011515460.1,GSDMC,gasdermin-C isoform X1	2	no	discard	identified as duplicate with existing V4.2/RefSeq annotation
chr19	35789887	35790031	-	LL0000034086	XLOC_015059	low confidence,XP_009299026.2,LOC100536750,gastrula zinc finger protein XlCGF52.1-like	low confidence,NP_001337759.1,ICA1,islet cell autoantigen 1 isoform e	1	no	discard	single exon with low confidence or no Blast hit
chr19	37072204	37074226	-	LL0000034087	XLOC_015061	low confidence,XP_021322807.1,esrrga,estrogen-related receptor gamma a, transcript variant X6	low confidence,XP_024305276.1,ESRRB,steroid hormone receptor ERR2 isoform X5	1	no	discard	single exon with low confidence or no Blast hit
chr19	38378401	38384605	-	LL0000034088	XLOC_015070	low confidence,XP_021333058.1,LOC101883618,uncharacterized protein PF11_0213-like	no Blast hit	1	no	discard	single exon with low confidence or no Blast hit
chr19	38733098	38747684	-	LL0000034089	XLOC_015075	high confidence,XP_021323854.1,adgrb2,adhesion G protein-coupled receptor B2	low confidence,XP_016857396.1,ADGRB2,adhesion G protein-coupled receptor B2 isoform X10	3	no	keep	high/moderate confidence zebrafish BLAST hit
chr19	39725912	39726010	-	LL0000034090	XLOC_015079	no Blast hit	low confidence,NP_001230175.1,P3H1,prolyl 3-hydroxylase 1 isoform 3 precursor	1	no	discard	single exon with low confidence or no Blast hit
chr19	39831464	39838155	-	LL0000034091	XLOC_015081	low confidence,XP_021334698.1,LOC101882148,uncharacterized LOC101882148, transcript variant X5	no Blast hit	8	no	discard	identified as duplicate with existing V4.2/RefSeq annotation
chr19	39994975	39996683	-	LL0000034092	XLOC_015082	low confidence,XP_003198845.1,si:ch73-194h10.3,si:ch73-194h10.3	no Blast hit	1	no	discard	single exon with low confidence or no Blast hit
chr19	40710830	40712385	-	LL0000034093	XLOC_015089	moderate confidence,XP_009289536.1,si:ch211-276i12.9,si:ch211-276i12.9	low confidence,XP_024309432.1,BBX,HMG box transcription factor BBX isoform X11	1	no	keep	high/moderate confidence zebrafish BLAST hit
chr19	40920947	40924992	-	LL0000034094	XLOC_015093	low confidence,XP_001344635.2,LOC100005637,uncharacterized LOC100005637	no Blast hit	6	no	keep	more than one exon
chr19	43207122	43209150	-	LL0000034095	XLOC_015129	low confidence,NP_001038409.1,jtb,jumping translocation breakpoint	no Blast hit	1	no	discard	single exon with low confidence or no Blast hit
chr19	43210185	43211494	-	LL0000034096	XLOC_015130	low confidence,NP_955906.1,cx32.3,connexin 32.3	low confidence,XP_016861874.1,TM4SF1,transmembrane 4 L6 family member 1 isoform X1	1	no	discard	single exon with low confidence or no Blast hit
chr19	44114439	44115797	-	LL0000034097	XLOC_015141	no Blast hit	no Blast hit	1	no	discard	single exon with low confidence or no Blast hit
chr19	44116282	44118087	-	LL0000034098	XLOC_015142	no Blast hit	no Blast hit	1	no	discard	single exon with low confidence or no Blast hit
chr19	45336039	45336451	-	LL0000034099	XLOC_015145	no Blast hit	low confidence,XP_011526551.1,TYK2,non-receptor tyrosine-protein kinase TYK2 isoform X3	1	no	discard	single exon with low confidence or no Blast hit
chr19	45370881	45372834	-	LL0000034100	XLOC_015146	low confidence,NP_001264046.2,acss2l,acetyl-coenzyme A synthetase, cytoplasmic	no Blast hit	1	no	discard	single exon with low confidence or no Blast hit
chr19	46607363	46614403	-	LL0000034101	XLOC_015155	low confidence,NP_001315129.1,si:dkey-77f5.3,si:dkey-77f5.3	no Blast hit	1	no	discard	single exon with low confidence or no Blast hit
chr19	46781542	46781905	-	LL0000034102	XLOC_015158	low confidence,XP_009291446.1,ect2l,epithelial cell transforming 2 like, transcript variant X4	no Blast hit	2	no	discard	identified as duplicate with existing V4.2/RefSeq annotation
chr19	47559861	47561171	-	LL0000034103	XLOC_015171	low confidence,XP_009294754.1,dock3,dedicator of cytokinesis 3, transcript variant X10	no Blast hit	1	no	discard	single exon with low confidence or no Blast hit
chr19	47561485	47562440	-	LL0000034104	XLOC_015172	low confidence,NP_001121732.1,cdk14,cyclin-dependent kinase 14	no Blast hit	1	no	discard	single exon with low confidence or no Blast hit
chr19	47657549	47657598	-	LL0000034105	XLOC_015177	no Blast hit	no Blast hit	1	no	discard	single exon with low confidence or no Blast hit
chr19	48100514	48100903	-	LL0000034106	XLOC_015186	low confidence,NP_001295895.1,iqgap1,IQ motif containing GTPase activating protein 1	low confidence,NP_003861.1,IQGAP1,ras GTPase-activating-like protein IQGAP1	1	no	discard	single exon with low confidence or no Blast hit
chr19	48145828	48146439	-	LL0000034107	XLOC_015188	low confidence,XP_009294837.1,frmd4bb,FERM domain containing 4Bb, transcript variant X2	low confidence,XP_016881901.1,ZNF791,zinc finger protein 791 isoform X1	1	no	discard	single exon with low confidence or no Blast hit
chr19	48423256	48424177	-	LL0000034108	XLOC_015197	low confidence,XP_003198156.1,clec16a,C-type lectin domain containing 16A, transcript variant X1	no Blast hit	1	no	discard	single exon with low confidence or no Blast hit
chr19	48448273	48449175	-	LL0000034109	XLOC_015198	no Blast hit	no Blast hit	1	no	discard	single exon with low confidence or no Blast hit
chr2	28830	31722	+	LL0000034110	XLOC_015209	high confidence,NP_919371.2,znfl2a,zinc finger-like gene 2a	high confidence,NP_009076.2,ZNF146,zinc finger protein OZF	2	no	keep	high/moderate confidence zebrafish BLAST hit
chr2	346194	346636	+	LL0000034111	XLOC_015224	low confidence,NP_001119858.1,slc6a6a,solute carrier family 6 (neurotransmitter transporter), member 6a	no Blast hit	1	no	discard	single exon with low confidence or no Blast hit
chr2	482702	484752	+	LL0000034112	XLOC_015228	no Blast hit	moderate confidence,XP_016869648.1,LOC107986982,MAGE-like protein 2	1	no	keep	moderate confidence BLAST hit to human protein
chr2	923221	925055	+	LL0000034113	XLOC_015230	low confidence,XP_021335606.1,LOC101886098,Fc receptor-like protein 5, transcript variant X5	no Blast hit	1	no	discard	single exon with low confidence or no Blast hit
chr2	1122237	1122834	+	LL0000034114	XLOC_015236	low confidence,XP_009304452.1,pik3ca,phosphatidylinositol-4,5-bisphosphate 3-kinase, catalytic subunit alpha, transcript variant X3	low confidence,NP_006209.2,PIK3CA,phosphatidylinositol 4,5-bisphosphate 3-kinase catalytic subunit alpha isoform	1	no	discard	single exon with low confidence or no Blast hit
chr2	1138158	1152623	+	LL0000034115	XLOC_015238	high confidence,XP_021322312.1,znf521,zinc finger protein 521	moderate confidence,NP_001295154.1,ZNF521,zinc finger protein 521 isoform 2	5	no	keep	high/moderate confidence zebrafish BLAST hit
chr2	1445959	1446793	+	LL0000034116	XLOC_015241	no Blast hit	low confidence,XP_016873488.1,CDC42BPG,serine/threonine-protein kinase MRCK gamma isoform X11	1	no	discard	single exon with low confidence or no Blast hit
chr2	2609550	2613314	+	LL0000034117	XLOC_015256	low confidence,NP_001264059.1,lamb1b,laminin, beta 1b	no Blast hit	2	no	keep	more than one exon
chr2	2614035	2614830	+	LL0000034118	XLOC_015257	low confidence,NP_956495.2,mitd1,MIT domain-containing protein 1	no Blast hit	1	no	discard	single exon with low confidence or no Blast hit
chr2	2615208	2616136	+	LL0000034119	XLOC_015258	no Blast hit	low confidence,NP_001238811.1,VIPR1,vasoactive intestinal polypeptide receptor 1 isoform 2	1	no	discard	single exon with low confidence or no Blast hit
chr2	2644418	2646327	+	LL0000034120	XLOC_015260	moderate confidence,XP_021335606.1,LOC101886098,Fc receptor-like protein 5, transcript variant X5	no Blast hit	1	no	keep	high/moderate confidence zebrafish BLAST hit
chr2	3023430	3026678	+	LL0000034121	XLOC_015268	low confidence,XP_021322010.1,p4ha3,prolyl 4-hydroxylase, alpha polypeptide III, transcript variant X5	low confidence,NP_001269421.1,ARMH2,armadillo-like helical domain-containing protein 2	2	no	keep	more than one exon
chr2	3273430	3278184	+	LL0000034122	XLOC_015272	low confidence,NP_001003597.1,mnd1,meiotic nuclear divisions 1 homolog (S. cerevisiae)	no Blast hit	1	no	discard	single exon with low confidence or no Blast hit
chr2	3278387	3279879	+	LL0000034123	XLOC_015273	low confidence,XP_009302258.1,sema3h,sema domain, immunoglobulin domain (Ig), short basic domain, secreted, (semaphorin) 3H, transcript variant X1	no Blast hit	1	no	discard	single exon with low confidence or no Blast hit
chr2	3937202	3943111	+	LL0000034124	XLOC_015286	high confidence,NP_571051.1,mpp7a,membrane protein, palmitoylated 7a (MAGUK p55 subfamily member 7)	high confidence,XP_011517640.1,MPP7,MAGUK p55 subfamily member 7 isoform X4	2	no	keep	high/moderate confidence zebrafish BLAST hit
chr2	4218437	4221105	+	LL0000034125	XLOC_015291	no Blast hit	no Blast hit	2	no	keep	more than one exon
chr2	5453268	5453513	+	LL0000034126	XLOC_015303	low confidence,NP_001035420.1,ext1c,exostoses (multiple) 1c	no Blast hit	1	no	discard	single exon with low confidence or no Blast hit
chr2	7554034	7554979	+	LL0000034127	XLOC_015334	low confidence,NP_001025454.1,ldlra,low density lipoprotein receptor a	low confidence,XP_011512645.1,FANCE,Fanconi anemia group E protein isoform X5	1	no	discard	single exon with low confidence or no Blast hit
chr2	8116684	8118566	+	LL0000034128	XLOC_015349	low confidence,XP_009302494.1,rimbp2,RIMS binding protein 2, transcript variant X3	no Blast hit	1	no	discard	single exon with low confidence or no Blast hit
chr2	9650198	9676726	+	LL0000034129	XLOC_015360	exact match,XP_017206840.1,LOC103909783,glutamate-rich protein 6-like	high confidence,NP_001295163.1,ERICH6,glutamate-rich protein 6 isoform 2	6	no	keep	high confidence BLAST hit to human protein
chr2	10173715	10177963	+	LL0000034130	XLOC_015374	high confidence,NP_001106978.1,il23r,interleukin 23 receptor	no Blast hit	1	no	keep	high/moderate confidence zebrafish BLAST hit
chr2	13430095	13430236	+	LL0000034131	XLOC_015403	low confidence,XP_021324236.1,senp6a,SUMO1/sentrin specific peptidase 6a, transcript variant X6	no Blast hit	1	no	discard	single exon with low confidence or no Blast hit
chr2	13857163	13862698	+	LL0000034132	XLOC_015407	high confidence,XP_021324313.1,ftr06,finTRIM family, member 6, transcript variant X1	moderate confidence,NP_001128360.1,RTL1,retrotransposon-like protein 1	4	no	keep	high/moderate confidence zebrafish BLAST hit
chr2	13862853	13864198	+	LL0000034133	XLOC_015408	no Blast hit	no Blast hit	1	no	discard	single exon with low confidence or no Blast hit
[truncated: 4,099 more rows]
