# Supplementary material for: An improved zebrafish transcriptome annotation for sensitive and comprehensive detection of cell type-specific genes
Source: eLife. 2020 Aug 24;9:e55792. doi: 10.7554/eLife.55792 (PMC7486121; doi:10.7554/eLife.55792)
Supplement: Figure 3—source data 5. — Annotation notes are also included regarding the relative strength of coordinate-based incorporation of NCBI (Entrez) and Ens99 gene identifiers. [file elife-55792-fig3-data5.xlsx]

## Sheet: Sheet1
LLchr	LLstart	LLend	LLstrand	LLgeneID	LLgeneAbbrev	geneName	Ens99geneIDversion	EntrezGeneID	ZFINgeneID	RefSeqAnnotationNote	Ens99annotationNote
chr12	6160446	6177944	-	LL0000000001	a1cf	apobec1 complementation factor	ENSDARG00000002968.11	562916	ZDB-GENE-060824-3	Entrez gene ID import through exact transcript match from gffcompare and abbreviation match	Ens99 gene ID import through exact transcript match from gffcompare and abbreviation match
chr15	21113965	21132480	-	LL0000000002	a2ml	alpha-2-macroglobulin-like	ENSDARG00000056314.8	100006972	ZDB-GENE-090212-1	Entrez gene ID import through exact transcript match from gffcompare and abbreviation match	Ens99 gene ID import through exact transcript match from gffcompare and abbreviation match
chr9	205245	216564	-	LL0000000003	aaas	achalasia, adrenocortical insufficiency, alacrimia	ENSDARG00000102274.2	378454	ZDB-GENE-030912-4	Entrez gene ID import through exact transcript match from gffcompare and abbreviation match	Ens99 gene ID import through exact transcript match from gffcompare and abbreviation match
chr5	18822795	18897585	-	LL0000000004	aacs	acetoacetyl-CoA synthetase	ENSDARG00000012468.11	393984	ZDB-GENE-040426-903	Entrez gene ID import through exact transcript match from gffcompare and abbreviation match	Ens99 gene ID import through exact transcript match from gffcompare and abbreviation match
chr15	1041759	1066339	-	LL0000000005	aadac	arylacetamide deacetylase	ENSDARG00000063621.5	100148912	ZDB-GENE-130530-713	Entrez gene ID import through exact transcript match from gffcompare and abbreviation match	Ens99 gene ID import through exact transcript match from gffcompare and abbreviation match
chr11	28547057	28620328	+	LL0000000006	aadacl4	arylacetamide deacetylase-like 4	ENSDARG00000044802.5	569798	ZDB-GENE-080919-2	Entrez gene ID import through exact transcript match from gffcompare and abbreviation match	Ens99 gene ID import through exact transcript match from gffcompare and abbreviation match
chr7	7675685	7695963	-	LL0000000007	aadat	aminoadipate aminotransferase	ENSDARG00000011410.10	557979	ZDB-GENE-111229-1	Entrez gene ID import through exact transcript match from gffcompare and abbreviation match	Ens99 gene ID import through exact transcript match from gffcompare and abbreviation match
chr18	19812608	19819812	-	LL0000000008	aagab	alpha and gamma adaptin binding protein	ENSDARG00000041170.4	436696	ZDB-GENE-040718-120	Entrez gene ID import through exact transcript match from gffcompare and abbreviation match	Ens99 gene ID import through exact transcript match from gffcompare and abbreviation match
chr8	48965095	49059618	+	LL0000000009	aak1a	AP2 associated kinase 1a	ENSDARG00000011855.9	568999	ZDB-GENE-081105-101	Entrez gene ID import through exact transcript match from gffcompare and abbreviation match	Ens99 gene ID import through exact transcript match from gffcompare and abbreviation match
chr10	41060739	41157154	-	LL0000000010	aak1b	AP2 associated kinase 1b	ENSDARG00000077686.7	100534954	ZDB-GENE-091118-25	Entrez gene ID import through exact transcript match from gffcompare and abbreviation match	Ens99 gene ID import through exact transcript match from gffcompare and abbreviation match
chr18	3096612	3103827	-	LL0000000011	aamdc	adipogenesis associated, Mth938 domain containing	ENSDARG00000103957.2	553802	ZDB-GENE-050522-64	Entrez gene ID import through exact transcript match from gffcompare and abbreviation match	Ens99 gene ID import through exact transcript match from gffcompare and abbreviation match
chr6	59913147	59922087	+	LL0000000012	aamp	angio-associated, migratory cell protein	ENSDARG00000045019.9	405874	ZDB-GENE-040426-2370	Entrez gene ID import through exact transcript match from gffcompare and abbreviation match	Ens99 gene ID import through exact transcript match from gffcompare and abbreviation match
chr6	23616889	23619546	-	LL0000000013	aanat1	arylalkylamine N-acetyltransferase 1	ENSDARG00000036567.7	393677	ZDB-GENE-040329-1	Entrez gene ID import through exact transcript match from gffcompare and abbreviation match	Ens99 gene ID import through exact transcript match from gffcompare and abbreviation match
chr3	54887782	54893797	-	LL0000000014	aanat2	arylalkylamine N-acetyltransferase 2	ENSDARG00000079802.4	30685	ZDB-GENE-991019-6	Entrez gene ID import through exact transcript match from gffcompare and abbreviation match	Ens99 gene ID import through exact transcript match from gffcompare and abbreviation match
chr23	4216193	4225830	-	LL0000000015	aar2	AAR2 splicing factor	ENSDARG00000018658.7	431768	ZDB-GENE-040704-68	Entrez gene ID import through exact transcript match from gffcompare and abbreviation match	Ens99 gene ID import through exact transcript match from gffcompare and abbreviation match
chr18	18636273	18821929	-	LL0000000016	aars	alanyl-tRNA synthetase [Source:ZFIN;Acc:ZDB-GENE-030131-3663]	ENSDARG00000069142.8	324940	ZDB-GENE-030131-3663	Entrez gene ID import through exact transcript match from gffcompare and abbreviation match	geneAbbrev conflict with Ens99 but matches ZFIN alias
chr22	25554200	25609123	+	LL0000000017	aars2	alanyl-tRNA synthetase 2, mitochondrial (putative)	ENSDARG00000107385.2	792787	ZDB-GENE-041008-213	Entrez gene ID import through exact transcript match from gffcompare and abbreviation match	Ens99 gene ID import through exact transcript match from gffcompare and abbreviation match
chr12	6049355	6063328	-	LL0000000018	aarsd1	alanyl-tRNA synthetase domain containing 1	ENSDARG00000015747.10	445178	ZDB-GENE-040801-91	Entrez gene ID import through exact transcript match from gffcompare and abbreviation match	Ens99 gene ID import through exact transcript match from gffcompare and abbreviation match
chr20	25645328	25659393	+	LL0000000019	aasdh	aminoadipate-semialdehyde dehydrogenase	ENSDARG00000022730.11	570338	ZDB-GENE-041210-322	Entrez gene ID import through exact transcript match from gffcompare and abbreviation match	Ens99 gene ID import through exact transcript match from gffcompare and abbreviation match
chr15	44432682	44465679	-	LL0000000020	aasdhppt	aminoadipate-semialdehyde dehydrogenase-phosphopantetheinyl transferase	ENSDARG00000037501.7	619247	ZDB-GENE-050913-36	Entrez gene ID import through exact transcript match from gffcompare and abbreviation match	Ens99 gene ID import through exact transcript match from gffcompare and abbreviation match
chr25	28279577	28336106	+	LL0000000021	aass	aminoadipate-semialdehyde synthase	ENSDARG00000051816.6	556229	ZDB-GENE-061220-8	Entrez gene ID import through exact transcript match from gffcompare and abbreviation match	Ens99 gene ID import through exact transcript match from gffcompare and abbreviation match
chr5	56277829	56337935	+	LL0000000022	aatf	apoptosis antagonizing transcription factor	ENSDARG00000025467.12	559477	ZDB-GENE-030131-9654	Entrez gene ID import through exact transcript match from gffcompare and abbreviation match	Ens99 gene ID import through exact transcript match from gffcompare and abbreviation match
chr3	51895349	51912019	-	LL0000000023	aatka	apoptosis-associated tyrosine kinase a	ENSDARG00000078222.5	100004850	ZDB-GENE-100812-4	partial transcript match; "j" class in gffcompare; abbreviation match	Ens99 gene ID import through exact transcript match from gffcompare and abbreviation match
chr12	35701039	35788275	-	LL0000000024	aatkb	apoptosis-associated tyrosine kinase b	ENSDARG00000104442.2	555739	ZDB-GENE-100812-6	Entrez gene ID import through exact transcript match from gffcompare and abbreviation match	Ens99 gene ID import through exact transcript match from gffcompare and abbreviation match
chr3	27831728	27880394	-	LL0000000025	abat	4-aminobutyrate aminotransferase	ENSDARG00000006031.10	378968	ZDB-GENE-031006-4	Entrez gene ID import through exact transcript match from gffcompare and abbreviation match	Ens99 gene ID import through exact transcript match from gffcompare and abbreviation match
chr9	40685613	40765868	-	LL0000000026	abca12	ATP-binding cassette, sub-family A (ABC1), member 12	ENSDARG00000074749.5	558335	ZDB-GENE-030131-9790	partial transcript match; "j" class in gffcompare; abbreviation match	Ens99 gene ID import through exact transcript match from gffcompare and abbreviation match
chr1	52560549	52628407	+	LL0000000027	abca1a	ATP-binding cassette, sub-family A (ABC1), member 1A	ENSDARG00000074635.7	558924	ZDB-GENE-031006-12	Entrez gene ID import through exact transcript match from gffcompare and abbreviation match	Ens99 gene ID import through exact transcript match from gffcompare and abbreviation match
chr14	6423973	6519386	+	LL0000000028	abca1b	ATP-binding cassette, sub-family A (ABC1), member 1B	ENSDARG00000079009.6	100136868	ZDB-GENE-030131-9826	Entrez gene ID import through exact transcript match from gffcompare and abbreviation match	Ens99 gene ID import through exact transcript match from gffcompare and abbreviation match
chr5	25087241	25236601	-	LL0000000029	abca2	ATP-binding cassette, sub-family A (ABC1), member 2	ENSDARG00000013500.11	100006090	ZDB-GENE-050517-1	Entrez gene ID import through exact transcript match from gffcompare and abbreviation match	Ens99 gene ID import through exact transcript match from gffcompare and abbreviation match
chr3	12589966	12699905	+	LL0000000030	abca3b	ATP-binding cassette, sub-family A (ABC1), member 3b	ENSDARG00000100524.3	564344	ZDB-GENE-050517-2	Entrez gene ID import through exact transcript match from gffcompare and abbreviation match	Ens99 gene ID import through exact transcript match from gffcompare and abbreviation match
chr24	28560921	28646325	-	LL0000000031	abca4a	ATP-binding cassette, sub-family A (ABC1), member 4a	ENSDARG00000057169.6	798993	ZDB-GENE-050517-3	Entrez gene ID import through exact transcript match from gffcompare and abbreviation match	Ens99 gene ID import through exact transcript match from gffcompare and abbreviation match
chr2	15203318	15294707	+	LL0000000032	abca4b	ATP-binding cassette, sub-family A (ABC1), member 4b	ENSDARG00000062661.10	555506	ZDB-GENE-050517-4	Entrez gene ID import through exact transcript match from gffcompare and abbreviation match	Ens99 gene ID import through exact transcript match from gffcompare and abbreviation match
chr12	38807536	38860671	+	LL0000000033	abca5	ATP-binding cassette, sub-family A (ABC1), member 5	ENSDARG00000074041.7	100151075	ZDB-GENE-050517-5	Entrez gene ID import through exact transcript match from gffcompare and abbreviation match	Ens99 gene ID import through exact transcript match from gffcompare and abbreviation match
chr13	24262872	24277532	+	LL0000000034	abcb10	ATP-binding cassette, sub-family B (MDR/TAP), member 10	ENSDARG00000061591.7	100003744	ZDB-GENE-040525-2	Entrez gene ID import through exact transcript match from gffcompare and abbreviation match	Ens99 gene ID import through exact transcript match from gffcompare and abbreviation match
chr9	48755638	48817119	+	LL0000000035	abcb11a	ATP-binding cassette, sub-family B (MDR/TAP), member 11a	ENSDARG00000011573.12	797269	ZDB-GENE-050517-13	partial transcript match; "j" class in gffcompare; abbreviation match	Ens99 gene ID import through exact transcript match from gffcompare and abbreviation match
chr11	13223611	13272085	+	LL0000000036	abcb11b	ATP-binding cassette, sub-family B (MDR/TAP), member 11b	ENSDARG00000070078.6	571189	ZDB-GENE-050517-14	Entrez gene ID import through exact transcript match from gffcompare and abbreviation match	Ens99 gene ID import through exact transcript match from gffcompare and abbreviation match
chr16	28629242	28658341	-	LL0000000037	abcb4	ATP-binding cassette, sub-family B (MDR/TAP), member 4	ENSDARG00000010936.12	100136865	ZDB-GENE-080204-52	Entrez gene ID import through exact transcript match from gffcompare and abbreviation match	Ens99 gene ID import through exact transcript match from gffcompare and abbreviation match
chr16	19537038	19568795	-	LL0000000038	abcb5	ATP-binding cassette, sub-family B (MDR/TAP), member 5	ENSDARG00000021787.10	798527	ZDB-GENE-030131-6414	Entrez gene ID import through exact transcript match from gffcompare and abbreviation match	Ens99 gene ID import through exact transcript match from gffcompare and abbreviation match
chr1	6135126	6160856	+	LL0000000039	abcb6a	ATP-binding cassette, sub-family B (MDR/TAP), member 6a	ENSDARG00000063297.5	564067	ZDB-GENE-050517-9	Entrez gene ID import through exact transcript match from gffcompare and abbreviation match	Ens99 gene ID import through exact transcript match from gffcompare and abbreviation match
chr9	14198583	14273978	-	LL0000000040	abcb6b	ATP-binding cassette, sub-family B (MDR/TAP), member 6b	ENSDARG00000074254.5	100004801	ZDB-GENE-070912-584	Entrez gene ID import through exact transcript match from gffcompare and abbreviation match	Ens99 gene ID import through exact transcript match from gffcompare and abbreviation match
chr14	10981703	11070156	+	LL0000000041	abcb7	ATP-binding cassette, sub-family B (MDR/TAP), member 7	ENSDARG00000062795.7	566515	ZDB-GENE-050517-10	Entrez gene ID import through exact transcript match from gffcompare and abbreviation match	Ens99 gene ID import through exact transcript match from gffcompare and abbreviation match
chr24	33781452	33801668	-	LL0000000042	abcb8	ATP-binding cassette, sub-family B (MDR/TAP), member 8	ENSDARG00000056672.6	548340	ZDB-GENE-050410-6	Entrez gene ID import through exact transcript match from gffcompare and abbreviation match	Ens99 gene ID import through exact transcript match from gffcompare and abbreviation match
chr5	28017008	28029964	-	LL0000000043	abcb9	ATP-binding cassette, sub-family B (MDR/TAP), member 9	ENSDARG00000056200.6	570148	ZDB-GENE-050517-12	Entrez gene ID import through exact transcript match from gffcompare and abbreviation match	Ens99 gene ID import through exact transcript match from gffcompare and abbreviation match
chr3	36713477	36743962	+	LL0000000044	abcc1	ATP-binding cassette, sub-family C (CFTR/MRP), member 1	ENSDARG00000104719.2	100002010	ZDB-GENE-050517-15	Entrez gene ID import through exact transcript match from gffcompare and abbreviation match	Ens99 gene ID import through exact transcript match from gffcompare and abbreviation match
chr11	11911399	11965033	-	LL0000000045	abcc10	ATP-binding cassette, sub-family C (CFTR/MRP), member 10	ENSDARG00000077988.4	556709	ZDB-GENE-050517-24	Entrez gene ID import through exact transcript match from gffcompare and abbreviation match	Ens99 gene ID import through exact transcript match from gffcompare and abbreviation match
chr7	38158604	38189863	-	LL0000000046	abcc12	ATP-binding cassette, sub-family C (CFTR/MRP), member 12	ENSDARG00000013050.12	568482	ZDB-GENE-050517-25	Entrez gene ID import through exact transcript match from gffcompare and abbreviation match	Ens99 gene ID import through exact transcript match from gffcompare and abbreviation match
chr24	24036195	24071203	-	LL0000000047	abcc13	ATP-binding cassette, sub-family C (CFTR/MRP), member 13	ENSDARG00000062519.7	559093	ZDB-GENE-050517-26	Entrez gene ID import through exact transcript match from gffcompare and abbreviation match	Ens99 gene ID import through exact transcript match from gffcompare and abbreviation match
chr13	681628	711592	+	LL0000000048	abcc2	ATP-binding cassette, sub-family C (CFTR/MRP), member 2	ENSDARG00000014031.10	393561	ZDB-GENE-040426-1523	Entrez gene ID import through exact transcript match from gffcompare and abbreviation match	Ens99 gene ID import through exact transcript match from gffcompare and abbreviation match
chr12	695353	788246	+	LL0000000049	abcc3	ATP-binding cassette, sub-family C (CFTR/MRP), member 3	ENSDARG00000096662.5	323301	ZDB-GENE-050517-16	Entrez gene ID import through exact transcript match from gffcompare and abbreviation match	Ens99 gene ID import through exact transcript match from gffcompare and abbreviation match
chr6	7322520	7391799	+	LL0000000050	abcc4	ATP-binding cassette, sub-family C (CFTR/MRP), member 4	ENSDARG00000058953.5	368620	ZDB-GENE-030616-511	Entrez gene ID import through exact transcript match from gffcompare and abbreviation match	Ens99 gene ID import through exact transcript match from gffcompare and abbreviation match
chr18	45791971	45852863	+	LL0000000051	abcc5	ATP-binding cassette, sub-family C (CFTR/MRP), member 5	ENSDARG00000061233.8	336147	ZDB-GENE-050517-17	Entrez gene ID import through exact transcript match from gffcompare and abbreviation match	Ens99 gene ID import through exact transcript match from gffcompare and abbreviation match
chr6	11026041	11068219	+	LL0000000052	abcc6a	ATP-binding cassette, sub-family C (CFTR/MRP), member 6a	ENSDARG00000016750.9	566555	ZDB-GENE-050517-18	Entrez gene ID import through exact transcript match from gffcompare and abbreviation match	Ens99 gene ID import through exact transcript match from gffcompare and abbreviation match
chr3	36744518	36765322	-	LL0000000053	abcc6b.1	ATP-binding cassette, sub-family C (CFTR/MRP), member 6b, tandem duplicate 1	ENSDARG00000105403.2	110439293	ZDB-GENE-050517-19	exact transcript match; abbrev conflict, less than 50% gene coordinate overlap	Ens99 gene ID import through exact transcript match from gffcompare and abbreviation match
chr3	36744820	36824257	-	LL0000000054	abcc6b.2	ATP-binding cassette, sub-family C (CFTR/MRP), member 6b, tandem duplicate 2	ENSDARG00000094901.4	100002917	ZDB-GENE-110208-2	Entrez gene ID import through exact transcript match from gffcompare and abbreviation match	Ens99 gene ID import through exact transcript match from gffcompare and abbreviation match
chr25	22719852	22849278	+	LL0000000055	abcc8	ATP-binding cassette, sub-family C (CFTR/MRP), member 8	ENSDARG00000051879.7	553281	ZDB-GENE-050517-22	Entrez gene ID import through exact transcript match from gffcompare and abbreviation match	Ens99 gene ID import through exact transcript match from gffcompare and abbreviation match
chr18	50040753	50086693	-	LL0000000056	abcc8b	ATP-binding cassette, sub-family C (CFTR/MRP), member 8b	ENSDARG00000077007.5	100329706	ZDB-GENE-120215-45	Entrez gene ID import through exact transcript match from gffcompare and abbreviation match	Ens99 gene ID import through exact transcript match from gffcompare and abbreviation match
chr4	14656688	14714231	+	LL0000000057	abcc9	ATP-binding cassette, sub-family C (CFTR/MRP), member 9	ENSDARG00000015985.11	561160	ZDB-GENE-050517-23	Entrez gene ID import through exact transcript match from gffcompare and abbreviation match	Ens99 gene ID import through exact transcript match from gffcompare and abbreviation match
chr8	8044934	8087246	+	LL0000000058	abcd1	ATP-binding cassette, sub-family D (ALD), member 1	ENSDARG00000074876.5	566367	ZDB-GENE-050517-27	Entrez gene ID import through exact transcript match from gffcompare and abbreviation match	Ens99 gene ID import through exact transcript match from gffcompare and abbreviation match
chr4	75292781	75308985	+	LL0000000059	abcd2	ATP-binding cassette, sub-family D (ALD), member 2	ENSDARG00000059409.6	100537809	ZDB-GENE-050517-28	geneAbbrevConflict; gffcompare transcript match; overlap gene coordinates >50%	Ens99 gene ID import through exact transcript match from gffcompare and abbreviation match
chrUn KN150165v1	1367	16840	+	LL0000000060	ABCD2 (1 of many)	ATP binding cassette subfamily D member 2 [Source:HGNC Symbol;Acc:HGNC:66]	ENSDARG00000099178.2	101882118		geneAbbrevConflict; gffcompare transcript match; overlap gene coordinates >90%	geneAbbrevConflict; gffcompare transcript match; overlap gene coordinates >90%
chr24	31310636	31332087	-	LL0000000061	abcd3a	ATP-binding cassette, sub-family D (ALD), member 3a	ENSDARG00000104085.2	406803	ZDB-GENE-040426-2868	Entrez gene ID import through exact transcript match from gffcompare and abbreviation match	Ens99 gene ID import through exact transcript match from gffcompare and abbreviation match
chr2	15108425	15125619	-	LL0000000062	abcd3b	ATP-binding cassette, sub-family D (ALD), member 3b	ENSDARG00000002947.10	100170781	ZDB-GENE-050517-29	Entrez gene ID import through exact transcript match from gffcompare and abbreviation match	Ens99 gene ID import through exact transcript match from gffcompare and abbreviation match
chr24	35910950	35930397	+	LL0000000063	abcd4	ATP-binding cassette, sub-family D (ALD), member 4	ENSDARG00000061770.7	767748	ZDB-GENE-050517-30	Entrez gene ID import through exact transcript match from gffcompare and abbreviation match	Ens99 gene ID import through exact transcript match from gffcompare and abbreviation match
chr23	43695036	43718089	-	LL0000000064	abce1	ATP-binding cassette, sub-family E (OABP), member 1	ENSDARG00000007216.8	406324	ZDB-GENE-040426-1995	Entrez gene ID import through exact transcript match from gffcompare and abbreviation match	Ens99 gene ID import through exact transcript match from gffcompare and abbreviation match
chr19	30428898	30447743	-	LL0000000065	abcf1	ATP-binding cassette, sub-family F (GCN20), member 1	ENSDARG00000031795.9	406467	ZDB-GENE-050517-31	Entrez gene ID import through exact transcript match from gffcompare and abbreviation match	Ens99 gene ID import through exact transcript match from gffcompare and abbreviation match
chr2	32505554	32513538	-	LL0000000066	abcf2a	ATP-binding cassette, sub-family F (GCN20), member 2a	ENSDARG00000038785.5	336770	ZDB-GENE-030131-8714	Entrez gene ID import through exact transcript match from gffcompare and abbreviation match	Ens99 gene ID import through exact transcript match from gffcompare and abbreviation match
chr7	41403690	41420226	-	LL0000000067	abcf2b	ATP-binding cassette, sub-family F (GCN20), member 2b	ENSDARG00000052331.8	100000576	ZDB-GENE-050506-58	Entrez gene ID import through exact transcript match from gffcompare and abbreviation match	Ens99 gene ID import through exact transcript match from gffcompare and abbreviation match
chr2	1218758	1227221	-	LL0000000068	abcf3	ATP-binding cassette, sub-family F (GCN20), member 3	ENSDARG00000089705.3	100331227	ZDB-GENE-050517-32	Entrez gene ID import through exact transcript match from gffcompare and abbreviation match	Ens99 gene ID import through exact transcript match from gffcompare and abbreviation match
chr15	5028608	5077099	+	LL0000000069	abcg1	ATP-binding cassette, sub-family G (WHITE), member 1	ENSDARG00000063475.7	556979	ZDB-GENE-070424-84	Entrez gene ID import through exact transcript match from gffcompare and abbreviation match	Ens99 gene ID import through exact transcript match from gffcompare and abbreviation match
chr23	45906137	45936747	+	LL0000000070	abcg2a	ATP-binding cassette, sub-family G (WHITE), member 2a	ENSDARG00000100075.2	735312	ZDB-GENE-050517-35	Entrez gene ID import through exact transcript match from gffcompare and abbreviation match	Ens99 gene ID import through exact transcript match from gffcompare and abbreviation match
chr1	8673061	8691969	-	LL0000000071	abcg2b	ATP-binding cassette, sub-family G (WHITE), member 2b	ENSDARG00000079361.5	570453	ZDB-GENE-050517-36	Entrez gene ID import through exact transcript match from gffcompare and abbreviation match	Ens99 gene ID import through exact transcript match from gffcompare and abbreviation match
chr13	5028491	5065661	-	LL0000000072	abcg2c	ATP-binding cassette, sub-family G (WHITE), member 2c	ENSDARG00000058574.8	569858	ZDB-GENE-050517-37	Entrez gene ID import through exact transcript match from gffcompare and abbreviation match	Ens99 gene ID import through exact transcript match from gffcompare and abbreviation match
chr1	50564405	50592813	-	LL0000000073	abcg2d	ATP-binding cassette, sub-family G (WHITE), member 2d	ENSDARG00000016818.10	735310	ZDB-GENE-050517-38	Entrez gene ID import through exact transcript match from gffcompare and abbreviation match	Ens99 gene ID import through exact transcript match from gffcompare and abbreviation match
chr5	30624105	30677288	+	LL0000000074	abcg4a	ATP-binding cassette, sub-family G (WHITE), member 4a	ENSDARG00000061047.6	564842	ZDB-GENE-050517-39	Entrez gene ID import through exact transcript match from gffcompare and abbreviation match	Ens99 gene ID import through exact transcript match from gffcompare and abbreviation match
chr15	23487730	23508214	-	LL0000000075	abcg4b	ATP-binding cassette, sub-family G (WHITE), member 4b	ENSDARG00000078068.3	794238	ZDB-GENE-080215-10	Entrez gene ID import through exact transcript match from gffcompare and abbreviation match	Ens99 gene ID import through exact transcript match from gffcompare and abbreviation match
chr13	10945337	10968607	+	LL0000000076	abcg5	ATP-binding cassette, sub-family G (WHITE), member 5	ENSDARG00000063078.5	557317	ZDB-GENE-050517-40	Entrez gene ID import through exact transcript match from gffcompare and abbreviation match	Ens99 gene ID import through exact transcript match from gffcompare and abbreviation match
chr13	10926528	10945394	-	LL0000000077	abcg8	ATP-binding cassette, sub-family G (WHITE), member 8	ENSDARG00000063059.9	100136850	ZDB-GENE-050517-41	Entrez gene ID import through exact transcript match from gffcompare and abbreviation match	Ens99 gene ID import through exact transcript match from gffcompare and abbreviation match
chr17	24533989	24569830	-	LL0000000078	abch1	ATP-binding cassette, sub-family H, member 1	ENSDARG00000071341.6	558667	ZDB-GENE-050517-42	Entrez gene ID import through exact transcript match from gffcompare and abbreviation match	Ens99 gene ID import through exact transcript match from gffcompare and abbreviation match
chr5	67884038	67895858	-	LL0000000079	abhd10a	abhydrolase domain containing 10a	ENSDARG00000076435.8	568517	ZDB-GENE-060526-144	Entrez gene ID import through exact transcript match from gffcompare and abbreviation match	Ens99 gene ID import through exact transcript match from gffcompare and abbreviation match
chr24	21927191	21934232	-	LL0000000080	abhd10b	abhydrolase domain containing 10b		492622	ZDB-GENE-041111-196	Entrez gene ID import through exact transcript match from gffcompare and abbreviation match	Ens99 gene ID import by transcript match; but abbreviation conflict and limited gene overlap; may be complex gene structure or incorrect Ensembl assignment
chr21	25701264	25722834	-	LL0000000081	abhd11	abhydrolase domain containing 11	ENSDARG00000069501.4	446169	ZDB-GENE-040909-1	Entrez gene ID import through exact transcript match from gffcompare and abbreviation match	Ens99 gene ID import through exact transcript match from gffcompare and abbreviation match
chr17	21154576	21200406	-	LL0000000082	abhd12	abhydrolase domain containing 12	ENSDARG00000071004.7	767657	ZDB-GENE-060929-268	Entrez gene ID import through exact transcript match from gffcompare and abbreviation match	Ens99 gene ID import through exact transcript match from gffcompare and abbreviation match
chr9	5344189	5351029	-	LL0000000083	abhd13	abhydrolase domain containing 13	ENSDARG00000059209.5	561333	ZDB-GENE-051120-54	Entrez gene ID import through exact transcript match from gffcompare and abbreviation match	Ens99 gene ID import through exact transcript match from gffcompare and abbreviation match
chr22	10698546	10711522	+	LL0000000084	abhd14a	abhydrolase domain containing 14A	ENSDARG00000058367.7	404598	ZDB-GENE-040426-2428	Entrez gene ID import through exact transcript match from gffcompare and abbreviation match	Ens99 gene ID import through exact transcript match from gffcompare and abbreviation match
chr6	53428955	53435712	+	LL0000000085	abhd14b	abhydrolase domain containing 14B	ENSDARG00000100531.3	393338	ZDB-GENE-040426-1342	Entrez gene ID import through exact transcript match from gffcompare and abbreviation match	Ens99 gene ID import through exact transcript match from gffcompare and abbreviation match
chr15	24946321	24960781	-	LL0000000086	abhd15a	abhydrolase domain containing 15a	ENSDARG00000078768.4	560644	ZDB-GENE-131121-270	Entrez gene ID import through exact transcript match from gffcompare and abbreviation match	Ens99 gene ID import through exact transcript match from gffcompare and abbreviation match
chr16	10477533	10516970	-	LL0000000087	abhd16a	abhydrolase domain containing 16A	ENSDARG00000078929.5	564613	ZDB-GENE-010601-2	Entrez gene ID import through exact transcript match from gffcompare and abbreviation match	Ens99 gene ID import through exact transcript match from gffcompare and abbreviation match
chr2	49039112	49074973	+	LL0000000088	abhd17aa	abhydrolase domain containing 17Aa	ENSDARG00000091433.3	322121	ZDB-GENE-030131-840	Entrez gene ID import through exact transcript match from gffcompare and abbreviation match	Ens99 gene ID import through exact transcript match from gffcompare and abbreviation match
chr8	19228103	19246360	-	LL0000000089	abhd17ab	abhydrolase domain containing 17Ab	ENSDARG00000043084.6	100003419	ZDB-GENE-081105-136	Entrez gene ID import through exact transcript match from gffcompare and abbreviation match	Ens99 gene ID import through exact transcript match from gffcompare and abbreviation match
chr5	25733774	25757578	+	LL0000000090	abhd17b	abhydrolase domain containing 17B	ENSDARG00000035571.8	437017	ZDB-GENE-040718-244	Entrez gene ID import through exact transcript match from gffcompare and abbreviation match	Ens99 gene ID import through exact transcript match from gffcompare and abbreviation match
chr7	10911396	11005919	+	LL0000000091	abhd17c	abhydrolase domain containing 17C	ENSDARG00000058452.7	393126	ZDB-GENE-040426-714	Entrez gene ID import through exact transcript match from gffcompare and abbreviation match	Ens99 gene ID import through exact transcript match from gffcompare and abbreviation match
chr14	49994501	50028475	-	LL0000000092	abhd18	abhydrolase domain containing 18	ENSDARG00000101961.3	503769	ZDB-GENE-050306-53	Entrez gene ID import through exact transcript match from gffcompare and abbreviation match	Ens99 gene ID import on matching gene abbreviation and > 0.8 gene coordinate overlap using intersectBed
chr7	13824119	13861657	+	LL0000000093	abhd2a	abhydrolase domain containing 2a	ENSDARG00000025797.8	393888	ZDB-GENE-040426-784	Entrez gene ID import through exact transcript match from gffcompare and abbreviation match	Ens99 gene ID import through exact transcript match from gffcompare and abbreviation match
chr25	19120529	19139259	-	LL0000000094	abhd2b	abhydrolase domain containing 2b	ENSDARG00000045804.7	559290	ZDB-GENE-061027-74	Entrez gene ID import through exact transcript match from gffcompare and abbreviation match	Ens99 gene ID import through exact transcript match from gffcompare and abbreviation match
chr2	11848510	11912347	-	LL0000000095	abhd3	abhydrolase domain containing 3	ENSDARG00000018809.10	447830	ZDB-GENE-040912-90	Entrez gene ID import through exact transcript match from gffcompare and abbreviation match	Ens99 gene ID import through exact transcript match from gffcompare and abbreviation match
chr2	51645135	51657111	+	LL0000000096	abhd4	abhydrolase domain containing 4	ENSDARG00000102887.2	550276	ZDB-GENE-050417-83	Entrez gene ID import through exact transcript match from gffcompare and abbreviation match	Ens99 gene ID import through exact transcript match from gffcompare and abbreviation match
chr11	42035732	42099645	-	LL0000000097	abhd6a	abhydrolase domain containing 6a	ENSDARG00000060756.4	799085	ZDB-GENE-090925-1	Entrez gene ID import through exact transcript match from gffcompare and abbreviation match	Ens99 gene ID import on gene abbreviation and default intersectBed stringency for gene coordinate overlap
chr23	19655299	19668782	+	LL0000000098	abhd6b	abhydrolase domain containing 6b	ENSDARG00000070894.6	558995	ZDB-GENE-070410-104	Entrez gene ID import through exact transcript match from gffcompare and abbreviation match	Ens99 gene ID import through exact transcript match from gffcompare and abbreviation match
chr2	54006395	54039381	-	LL0000000099	abhd8a	abhydrolase domain containing 8a	ENSDARG00000103518.2	558563	ZDB-GENE-080204-70	Entrez gene ID import through exact transcript match from gffcompare and abbreviation match	Ens99 gene ID import through exact transcript match from gffcompare and abbreviation match
chr11	5933635	5945713	-	LL0000000100	abhd8b	abhydrolase domain containing 8b	ENSDARG00000076620.4	101883400	ZDB-GENE-130530-805	Entrez gene ID import through exact transcript match from gffcompare and abbreviation match	Ens99 gene ID import through exact transcript match from gffcompare and abbreviation match
chr24	5935377	6012863	+	LL0000000101	abi1a	abl-interactor 1a	ENSDARG00000010155.12	393711	ZDB-GENE-040426-1701	Entrez gene ID import through exact transcript match from gffcompare and abbreviation match	Ens99 gene ID import through exact transcript match from gffcompare and abbreviation match
chr2	9868416	9915938	-	LL0000000102	abi1b	abl-interactor 1b	ENSDARG00000062991.8	767738	ZDB-GENE-060929-1182	Entrez gene ID import through exact transcript match from gffcompare and abbreviation match	Ens99 gene ID import through exact transcript match from gffcompare and abbreviation match
chr9	13733468	13800223	+	LL0000000103	abi2a	abl-interactor 2a	ENSDARG00000058207.7	767646	ZDB-GENE-060929-192	Entrez gene ID import through exact transcript match from gffcompare and abbreviation match	Ens99 gene ID import through exact transcript match from gffcompare and abbreviation match
chr6	9970714	10011275	+	LL0000000104	abi2b	abl-interactor 2b	ENSDARG00000014875.11	692331	ZDB-GENE-060519-5	Entrez gene ID import through exact transcript match from gffcompare and abbreviation match	Ens99 gene ID import through exact transcript match from gffcompare and abbreviation match
chr3	33395942	33417972	-	LL0000000105	abi3a	ABI family, member 3a	ENSDARG00000060072.7	767807	ZDB-GENE-060929-958	Entrez gene ID import through exact transcript match from gffcompare and abbreviation match	Ens99 gene ID import through exact transcript match from gffcompare and abbreviation match
chr12	5492798	5572836	-	LL0000000106	abi3b	ABI family, member 3b	ENSDARG00000063283.6	566059	ZDB-GENE-121214-259	Entrez gene ID import through exact transcript match from gffcompare and abbreviation match	Ens99 gene ID import through exact transcript match from gffcompare and abbreviation match
chr9	30130028	30165621	-	LL0000000107	abi3bpa	ABI family, member 3 (NESH) binding protein a	ENSDARG00000062156.7	101884149	ZDB-GENE-070912-325	geneAbbrevConflict; gffcompare transcript match; overlap gene coordinates >90%	Ens99 gene ID import through exact transcript match from gffcompare and abbreviation match
chr22	28446365	28482973	+	LL0000000108	abi3bpb	ABI family, member 3 (NESH) binding protein b	ENSDARG00000071095.7	100149890	ZDB-GENE-030131-6041	Entrez gene ID import through exact transcript match from gffcompare and abbreviation match	Ens99 gene ID import through exact transcript match from gffcompare and abbreviation match
chr5	72144458	72171895	+	LL0000000109	abl1	c-abl oncogene 1, non-receptor tyrosine kinase	ENSDARG00000035187.7	100000720	ZDB-GENE-100812-9	Entrez gene ID import through exact transcript match from gffcompare and abbreviation match	Ens99 gene ID import through exact transcript match from gffcompare and abbreviation match
chr8	14914765	14985276	+	LL0000000110	abl2	c-abl oncogene 2, non-receptor tyrosine kinase	ENSDARG00000013841.12	570636	ZDB-GENE-020809-2	Entrez gene ID import through exact transcript match from gffcompare and abbreviation match	Ens99 gene ID import through exact transcript match from gffcompare and abbreviation match
chr13	43507383	43599939	-	LL0000000111	ablim1a	actin binding LIM protein 1a	ENSDARG00000060149.7	100003558	ZDB-GENE-080219-41	Entrez gene ID import through exact transcript match from gffcompare and abbreviation match	Ens99 gene ID import through exact transcript match from gffcompare and abbreviation match
chr12	30046320	30220681	+	LL0000000112	ablim1b	actin binding LIM protein 1b	ENSDARG00000045064.10	541550	ZDB-GENE-050327-91	Entrez gene ID import through exact transcript match from gffcompare and abbreviation match	Ens99 gene ID import through exact transcript match from gffcompare and abbreviation match
chr12	22680115	22819889	+	LL0000000113	ablim2	actin binding LIM protein family, member 2	ENSDARG00000055223.7	568454	ZDB-GENE-100316-5	Entrez gene ID import through exact transcript match from gffcompare and abbreviation match	Ens99 gene ID import through exact transcript match from gffcompare and abbreviation match
chr14	34634139	34771923	-	LL0000000114	ablim3	actin binding LIM protein family, member 3	ENSDARG00000088168.6	566821	ZDB-GENE-070112-1122	Entrez gene ID import through exact transcript match from gffcompare and abbreviation match	Ens99 gene ID import through exact transcript match from gffcompare and abbreviation match
chr5	25023019	25037475	-	LL0000000115	abo	ABO blood group (transferase A, alpha 1-3-N-acetylgalactosaminyltransferase%3B transferase B, alpha 1-3-galactosyltransferase)	ENSDARG00000019207.10	563897	ZDB-GENE-081104-23	Entrez gene ID import through exact transcript match from gffcompare and abbreviation match	Ens99 gene ID import through exact transcript match from gffcompare and abbreviation match
chr5	62611069	62642718	+	LL0000000116	abr	ABR activator of RhoGEF and GTPase	ENSDARG00000095180.2	565190	ZDB-GENE-070705-146	Ens99 gene ID import through exact transcript match from gffcompare; abbrev conflict matches ZFIN alias	Ens99 gene ID import through exact transcript match from gffcompare and abbreviation match
chr6	52064223	52072829	+	LL0000000117	abraa	actin binding Rho activating protein a	ENSDARG00000038583.7	324520	ZDB-GENE-120730-1	Entrez gene ID import through exact transcript match from gffcompare and abbreviation match	Ens99 gene ID import through exact transcript match from gffcompare and abbreviation match
chr19	46768266	46778007	-	LL0000000118	abrab	actin binding Rho activating protein b	ENSDARG00000033854.7	445477	ZDB-GENE-040822-7	Entrez gene ID import through exact transcript match from gffcompare and abbreviation match	Ens99 gene ID import through exact transcript match from gffcompare and abbreviation match
chr20	36806398	36818195	+	LL0000000119	abracl	ABRA C-terminal like	ENSDARG00000042876.6	336650	ZDB-GENE-030131-8594	Entrez gene ID import through exact transcript match from gffcompare and abbreviation match	Ens99 gene ID import through exact transcript match from gffcompare and abbreviation match
chr21	19319804	19329076	+	LL0000000120	abraxas1	abraxas 1, BRCA1 A complex subunit	ENSDARG00000043339.5	449820	ZDB-GENE-041010-70	Ens99 gene ID import through exact transcript match from gffcompare; abbrev conflict matches ZFIN alias	Ens99 gene ID import through exact transcript match from gffcompare and abbreviation match
chr17	31802581	31819846	-	LL0000000121	abraxas2	abraxas 2, BRISC complex subunit	ENSDARG00000098907.2	406584	ZDB-GENE-040426-2491	Ens99 gene ID import through exact transcript match from gffcompare; abbrev conflict matches ZFIN alias	Ens99 gene ID import through exact transcript match from gffcompare and abbreviation match
chr8	8483664	8489886	-	LL0000000122	abt1	activator of basal transcription 1	ENSDARG00000043666.5	553568	ZDB-GENE-050522-127	Entrez gene ID import through exact transcript match from gffcompare and abbreviation match	Ens99 gene ID import through exact transcript match from gffcompare and abbreviation match
chr8	7097710	7125531	+	LL0000000123	abtb1	ankyrin repeat and BTB (POZ) domain containing 1	ENSDARG00000063354.6	100536189	ZDB-GENE-141212-241	Entrez gene ID import through exact transcript match from gffcompare and abbreviation match	Ens99 gene ID import through exact transcript match from gffcompare and abbreviation match
chr7	49272322	49320952	+	LL0000000124	abtb2a	ankyrin repeat and BTB (POZ) domain containing 2a	ENSDARG00000059751.7	559451	ZDB-GENE-100422-13	Entrez gene ID import through exact transcript match from gffcompare and abbreviation match	Ens99 gene ID import through exact transcript match from gffcompare and abbreviation match
chr25	24616717	24723873	+	LL0000000125	abtb2b	ankyrin repeat and BTB (POZ) domain containing 2b	ENSDARG00000062000.7	100007078	ZDB-GENE-100422-14	Entrez gene ID import through exact transcript match from gffcompare and abbreviation match	Ens99 gene ID import through exact transcript match from gffcompare and abbreviation match
chr24	20325312	20332460	+	LL0000000126	acaa1	acetyl-CoA acyltransferase 1	ENSDARG00000004687.8	431754	ZDB-GENE-040704-48	Entrez gene ID import through exact transcript match from gffcompare and abbreviation match	Ens99 gene ID import through exact transcript match from gffcompare and abbreviation match
chr8	2509625	2529896	-	LL0000000127	acaa2	acetyl-CoA acyltransferase 2	ENSDARG00000038881.6	406325	ZDB-GENE-040426-1996	Entrez gene ID import through exact transcript match from gffcompare and abbreviation match	Ens99 gene ID import through exact transcript match from gffcompare and abbreviation match
chr5	56308614	56416249	-	LL0000000128	acaca	acetyl-CoA carboxylase alpha	ENSDARG00000078512.6	559403	ZDB-GENE-060526-74	Entrez gene ID import through exact transcript match from gffcompare and abbreviation match	Ens99 gene ID import through exact transcript match from gffcompare and abbreviation match
chr5	19331276	19384587	+	LL0000000129	acacb	acetyl-CoA carboxylase beta	ENSDARG00000061994.7	556236	ZDB-GENE-060526-132	Entrez gene ID import through exact transcript match from gffcompare and abbreviation match	Ens99 gene ID import through exact transcript match from gffcompare and abbreviation match
chr24	11350330	11446166	-	LL0000000130	acad11	acyl-CoA dehydrogenase family, member 11	ENSDARG00000045411.7	393147	ZDB-GENE-040426-814	Entrez gene ID import through exact transcript match from gffcompare and abbreviation match	Ens99 gene ID import through exact transcript match from gffcompare and abbreviation match
chr15	19335646	19348383	+	LL0000000131	acad8	acyl-CoA dehydrogenase family, member 8	ENSDARG00000042658.6	394130	ZDB-GENE-040426-828	Entrez gene ID import through exact transcript match from gffcompare and abbreviation match	Ens99 gene ID import through exact transcript match from gffcompare and abbreviation match
chr11	26682846	26701611	-	LL0000000132	acad9	acyl-CoA dehydrogenase family, member 9	ENSDARG00000055620.7	724002	ZDB-GENE-060616-196	Entrez gene ID import through exact transcript match from gffcompare and abbreviation match	Ens99 gene ID import through exact transcript match from gffcompare and abbreviation match
chr18	39487486	39505847	+	LL0000000133	acadl	acyl-CoA dehydrogenase long chain	ENSDARG00000088357.3	394156	ZDB-GENE-040426-771	Entrez gene ID import through exact transcript match from gffcompare and abbreviation match	Ens99 gene ID import through exact transcript match from gffcompare and abbreviation match
chr2	26470050	26476150	-	LL0000000134	acadm	acyl-CoA dehydrogenase medium chain	ENSDARG00000038900.9	406283	ZDB-GENE-040426-1945	Entrez gene ID import through exact transcript match from gffcompare and abbreviation match	Ens99 gene ID import through exact transcript match from gffcompare and abbreviation match
chr10	43999263	44017665	-	LL0000000135	acads	acyl-CoA dehydrogenase short chain	ENSDARG00000030781.10	445288	ZDB-GENE-040808-64	Entrez gene ID import through exact transcript match from gffcompare and abbreviation match	Ens99 gene ID import through exact transcript match from gffcompare and abbreviation match
chr12	49156997	49166761	-	LL0000000136	acadsb	acyl-CoA dehydrogenase short/branched chain	ENSDARG00000076780.5	110437777	ZDB-GENE-070410-109	geneAbbrevConflict; gffcompare transcript match; overlap gene coordinates >50%	Ens99 gene ID import through exact transcript match from gffcompare and abbreviation match
chr7	20298320	20335655	+	LL0000000137	acadvl	acyl-CoA dehydrogenase very long chain	ENSDARG00000016687.10	573723	ZDB-GENE-030131-899	Entrez gene ID import through exact transcript match from gffcompare and abbreviation match	Ens99 gene ID import through exact transcript match from gffcompare and abbreviation match
chr7	48761646	48787758	+	LL0000000138	acana	aggrecan a	ENSDARG00000035891.8	497505	ZDB-GENE-050208-221	Entrez gene ID import through exact transcript match from gffcompare and abbreviation match	Ens99 gene ID import through exact transcript match from gffcompare and abbreviation match
chr25	19212262	19224344	-	LL0000000139	acanb	aggrecan b	ENSDARG00000045799.6	559593	ZDB-GENE-100422-16	Entrez gene ID import through exact transcript match from gffcompare and abbreviation match	Ens99 gene ID import through exact transcript match from gffcompare and abbreviation match
chr7	20058505	20158380	-	LL0000000140	acap1	ArfGAP with coiled-coil, ankyrin repeat and PH domains 1	ENSDARG00000056346.8	561771	ZDB-GENE-070112-1242	Entrez gene ID import through exact transcript match from gffcompare and abbreviation match	Ens99 gene ID import through exact transcript match from gffcompare and abbreviation match
chr22	37732978	37797003	-	LL0000000141	acap2	ArfGAP with coiled-coil, ankyrin repeat and PH domains 2	ENSDARG00000060783.7	100124613	ZDB-GENE-050208-640	Entrez gene ID import through exact transcript match from gffcompare and abbreviation match	Ens99 gene ID import through exact transcript match from gffcompare and abbreviation match
chr23	36887475	36934944	-	LL0000000142	acap3a	ArfGAP with coiled-coil, ankyrin repeat and PH domains 3a	ENSDARG00000075990.5	322991	ZDB-GENE-030131-1711	partial transcript match; "j" class in gffcompare; abbreviation match	Ens99 gene ID import through exact transcript match from gffcompare and abbreviation match
chr11	3385052	3494980	-	LL0000000143	acap3b	ArfGAP with coiled-coil, ankyrin repeat and PH domains 3b	ENSDARG00000099240.3	100009646	ZDB-GENE-070209-274	Entrez gene ID import through exact transcript match from gffcompare and abbreviation match	Ens99 gene ID import through exact transcript match from gffcompare and abbreviation match
chr10	38663917	38698966	+	LL0000000144	acat1	acetyl-CoA acetyltransferase 1	ENSDARG00000045888.6	445290	ZDB-GENE-040808-68	Entrez gene ID import through exact transcript match from gffcompare and abbreviation match	Ens99 gene ID import through exact transcript match from gffcompare and abbreviation match
chr20	30922595	30931182	-	LL0000000145	acat2	acetyl-CoA acetyltransferase 2	ENSDARG00000007127.11	30643	ZDB-GENE-990714-22	Entrez gene ID import through exact transcript match from gffcompare and abbreviation match	Ens99 gene ID import through exact transcript match from gffcompare and abbreviation match
chr20	30702531	30721862	+	LL0000000146	acbd3	acyl-Coenzyme A binding domain containing 3	ENSDARG00000042623.10	406270	ZDB-GENE-040426-1930	Entrez gene ID import through exact transcript match from gffcompare and abbreviation match	Ens99 gene ID import through exact transcript match from gffcompare and abbreviation match
chr12	15568761	15620090	-	LL0000000147	acbd4	acyl-CoA binding domain containing 4	ENSDARG00000027070.9	406368	ZDB-GENE-040426-2074	Entrez gene ID import through exact transcript match from gffcompare and abbreviation match	Ens99 gene ID import through exact transcript match from gffcompare and abbreviation match
chr24	5915892	5933146	-	LL0000000148	acbd5a	acyl-CoA binding domain containing 5a	ENSDARG00000034883.8	553674	ZDB-GENE-050522-268	Entrez gene ID import through exact transcript match from gffcompare and abbreviation match	Ens99 gene ID import through exact transcript match from gffcompare and abbreviation match
chr2	9918654	9941535	+	LL0000000149	acbd5b	acyl-CoA binding domain containing 5b	ENSDARG00000058410.7	100004736	ZDB-GENE-070705-18	Entrez gene ID import through exact transcript match from gffcompare and abbreviation match	geneAbbrevConflict; gffcompare transcript match; overlap gene coordinates >90%
chr8	14381272	14441812	+	LL0000000150	acbd6	acyl-CoA binding domain containing 6	ENSDARG00000039456.7	324090	ZDB-GENE-030131-2810	Entrez gene ID import through exact transcript match from gffcompare and abbreviation match	Ens99 gene ID import through exact transcript match from gffcompare and abbreviation match
chr16	28596555	28599328	+	LL0000000151	acbd7	acyl-CoA binding domain containing 7	ENSDARG00000094730.3	619256	ZDB-GENE-050913-108	Entrez gene ID import through exact transcript match from gffcompare and abbreviation match	Ens99 gene ID import through exact transcript match from gffcompare and abbreviation match
chr25	8921425	8949639	+	LL0000000152	accs	1-aminocyclopropane-1-carboxylate synthase homolog (Arabidopsis)(non-functional)	ENSDARG00000052124.8	541510	ZDB-GENE-050327-39	Entrez gene ID import through exact transcript match from gffcompare and abbreviation match	Ens99 gene ID import through exact transcript match from gffcompare and abbreviation match
chr7	29080614	29094305	+	LL0000000153	acd	ACD shelterin complex subunit and telomerase recruitment factor	ENSDARG00000078055.5	794664	ZDB-GENE-081022-45	Entrez gene ID import through exact transcript match from gffcompare and abbreviation match	Ens99 gene ID import through exact transcript match from gffcompare and abbreviation match
chr12	5529186	5582060	+	LL0000000154	ace	angiotensin I converting enzyme (peptidyl-dipeptidase A) 1	ENSDARG00000079166.4	565980	ZDB-GENE-030131-1826	Entrez gene ID import through exact transcript match from gffcompare and abbreviation match	Ens99 gene ID import through exact transcript match from gffcompare and abbreviation match
chr11	29981515	29996864	-	LL0000000155	ace2	angiotensin I converting enzyme 2	ENSDARG00000016918.11	492331	ZDB-GENE-041114-6	Entrez gene ID import through exact transcript match from gffcompare and abbreviation match	Ens99 gene ID import through exact transcript match from gffcompare and abbreviation match
chr8	20231182	20246036	-	LL0000000156	acer1	alkaline ceramidase 1	ENSDARG00000010347.9	550266	ZDB-GENE-050417-70	Entrez gene ID import through exact transcript match from gffcompare and abbreviation match	Ens99 gene ID import through exact transcript match from gffcompare and abbreviation match
chr7	71513996	71531846	-	LL0000000157	acer2	alkaline ceramidase 2	ENSDARG00000077782.4	100331179	ZDB-GENE-121026-1	Entrez gene ID import through exact transcript match from gffcompare and abbreviation match	Ens99 gene ID import through exact transcript match from gffcompare and abbreviation match
chr10	38526496	38544426	+	LL0000000158	acer3	alkaline ceramidase 3	ENSDARG00000093366.2	555411	ZDB-GENE-091204-155	Entrez gene ID import through exact transcript match from gffcompare and abbreviation match	Ens99 gene ID import through exact transcript match from gffcompare and abbreviation match
chr7	26077153	26087807	-	LL0000000159	ache	acetylcholinesterase	ENSDARG00000031796.8	114549	ZDB-GENE-010906-1	Entrez gene ID import through exact transcript match from gffcompare and abbreviation match	Ens99 gene ID import through exact transcript match from gffcompare and abbreviation match
chr2	38197815	38225472	-	LL0000000160	acin1a	apoptotic chromatin condensation inducer 1a	ENSDARG00000054290.9	368893	ZDB-GENE-030616-583	Entrez gene ID import through exact transcript match from gffcompare and abbreviation match	Ens99 gene ID import through exact transcript match from gffcompare and abbreviation match
chr7	24069421	24097070	+	LL0000000161	acin1b	apoptotic chromatin condensation inducer 1b	ENSDARG00000026842.10	327495	ZDB-GENE-030826-12	Entrez gene ID import through exact transcript match from gffcompare and abbreviation match	Ens99 gene ID import through exact transcript match from gffcompare and abbreviation match
chr2	3420003	3443705	+	LL0000000162	ACKR2	atypical chemokine receptor 2-like [Source:NCBI gene;Acc:101887081]	ENSDARG00000086314.3	101887081		geneAbbrevConflict; gffcompare transcript match; overlap gene coordinates >90%	Ens99 gene ID import by transcript match; but abbreviation conflict and limited gene overlap; may be complex gene structure or incorrect Ensembl assignment
chr9	24043780	24050336	-	LL0000000163	ackr3a	atypical chemokine receptor 3a	ENSDARG00000062478.7	100000764	ZDB-GENE-070301-5	Entrez gene ID import through exact transcript match from gffcompare and abbreviation match	Ens99 gene ID import through exact transcript match from gffcompare and abbreviation match
chr6	15751973	15757912	-	LL0000000164	ackr3b	atypical chemokine receptor 3b	ENSDARG00000058179.6	561050	ZDB-GENE-031116-61	Entrez gene ID import through exact transcript match from gffcompare and abbreviation match	Ens99 gene ID import through exact transcript match from gffcompare and abbreviation match
chr2	31671285	31675514	+	LL0000000165	ackr4a	atypical chemokine receptor 4a	ENSDARG00000078729.5	100003167	ZDB-GENE-070301-6	Entrez gene ID import through exact transcript match from gffcompare and abbreviation match	Ens99 gene ID import through exact transcript match from gffcompare and abbreviation match
chr24	11381334	11404925	+	LL0000000166	ackr4b	atypical chemokine receptor 4b	ENSDARG00000040133.6	641390	ZDB-GENE-051107-10	Entrez gene ID import through exact transcript match from gffcompare and abbreviation match	Ens99 gene ID import through exact transcript match from gffcompare and abbreviation match
chr3	17951790	18009316	+	LL0000000167	aclya	ATP citrate lyase a	ENSDARG00000099079.2	436922	ZDB-GENE-031113-1	Entrez gene ID import through exact transcript match from gffcompare and abbreviation match	Ens99 gene ID import through exact transcript match from gffcompare and abbreviation match
chr12	13973058	14078070	-	LL0000000168	aclyb	ATP citrate lyase b	ENSDARG00000055652.6	794259	ZDB-GENE-090909-2	Entrez gene ID import through exact transcript match from gffcompare and abbreviation match	Ens99 gene ID import through exact transcript match from gffcompare and abbreviation match
chr9	23244292	23253870	-	LL0000000169	acmsd	aminocarboxymuconate semialdehyde decarboxylase	ENSDARG00000062549.8	557166	ZDB-GENE-070410-103	Entrez gene ID import through exact transcript match from gffcompare and abbreviation match	Ens99 gene ID import through exact transcript match from gffcompare and abbreviation match
chr7	71458555	71489937	-	LL0000000170	aco1	aconitase 1, soluble	ENSDARG00000026376.11	568448	ZDB-GENE-031118-76	Entrez gene ID import through exact transcript match from gffcompare and abbreviation match	Ens99 gene ID import through exact transcript match from gffcompare and abbreviation match
chr12	19106422	19119176	-	LL0000000171	aco2	aconitase 2, mitochondrial	ENSDARG00000007294.11	322670	ZDB-GENE-030131-1390	Entrez gene ID import through exact transcript match from gffcompare and abbreviation match	Ens99 gene ID import through exact transcript match from gffcompare and abbreviation match
chr9	21832285	21838045	-	LL0000000172	acod1	aconitate decarboxylase 1	ENSDARG00000069844.6	795305	ZDB-GENE-081104-428	Ens99 gene ID import through exact transcript match from gffcompare; abbrev conflict matches ZFIN alias	Ens99 gene ID import through exact transcript match from gffcompare and abbreviation match
chr2	11028923	11064145	+	LL0000000173	acot11a	acyl-CoA thioesterase 11a	ENSDARG00000058229.9	554842	ZDB-GENE-050522-538	Entrez gene ID import through exact transcript match from gffcompare and abbreviation match	Ens99 gene ID import through exact transcript match from gffcompare and abbreviation match
chr8	17992848	18010735	-	LL0000000174	acot11b	acyl-CoA thioesterase 11b	ENSDARG00000042122.9	641574	ZDB-GENE-051127-37	Entrez gene ID import through exact transcript match from gffcompare and abbreviation match	Ens99 gene ID import through exact transcript match from gffcompare and abbreviation match
chr10	42903091	42923385	-	LL0000000175	ACOT12	acyl-CoA thioesterase 12 [Source:NCBI gene;Acc:100536873]	ENSDARG00000054534.6	100536873		partial transcript match; "j" class in gffcompare; abbreviation match	Ens99 gene ID import through exact transcript match from gffcompare and abbreviation match
chr19	31576831	31579383	+	LL0000000176	acot13	acyl-CoA thioesterase 13	ENSDARG00000061728.8	564010	ZDB-GENE-060503-437	Entrez gene ID import through exact transcript match from gffcompare and abbreviation match	Ens99 gene ID import through exact transcript match from gffcompare and abbreviation match
chr4	25607101	25620734	+	LL0000000177	acot14	acyl-CoA thioesterase 14	ENSDARG00000089159.4	557184	ZDB-GENE-041210-202	partial transcript match; "j" class in gffcompare; abbreviation match	Ens99 gene ID import through exact transcript match from gffcompare and abbreviation match
chr4	25626728	25647987	+	LL0000000178	acot15	acyl-CoA thioesterase 15	ENSDARG00000045522.8	557032	ZDB-GENE-041210-203	Entrez gene ID import through exact transcript match from gffcompare and abbreviation match	Ens99 gene ID import through exact transcript match from gffcompare and abbreviation match
chr4	25651692	25666835	+	LL0000000179	acot16	acyl-CoA thioesterase 16	ENSDARG00000069292.6	402867	ZDB-GENE-041210-201	Entrez gene ID import through exact transcript match from gffcompare and abbreviation match	Ens99 gene ID import through exact transcript match from gffcompare and abbreviation match
chr4	25678113	25691507	+	LL0000000180	acot17	acyl-CoA thioesterase 17	ENSDARG00000088524.4	572757	ZDB-GENE-040426-2381	Entrez gene ID import through exact transcript match from gffcompare and abbreviation match	Ens99 gene ID import through exact transcript match from gffcompare and abbreviation match
chr4	25691642	25704068	+	LL0000000181	acot18	acyl-CoA thioesterase 18	ENSDARG00000033413.10	556673	ZDB-GENE-041210-254	Entrez gene ID import through exact transcript match from gffcompare and abbreviation match	Ens99 gene ID import through exact transcript match from gffcompare and abbreviation match
chr25	31710322	31739702	-	LL0000000182	acot19	acyl-CoA thioesterase 19	ENSDARG00000040427.6	492778	ZDB-GENE-041114-124	Entrez gene ID import through exact transcript match from gffcompare and abbreviation match	Ens99 gene ID import through exact transcript match from gffcompare and abbreviation match
chr20	28935385	28941112	+	LL0000000183	acot20	acyl-CoA thioesterase 20	ENSDARG00000042510.5	553440	ZDB-GENE-041001-182	Entrez gene ID import through exact transcript match from gffcompare and abbreviation match	Ens99 gene ID import through exact transcript match from gffcompare and abbreviation match
chr20	28945950	28956378	-	LL0000000184	acot21	acyl-CoA thioesterase 21	ENSDARG00000042513.5	562047	ZDB-GENE-041001-181	Entrez gene ID import through exact transcript match from gffcompare and abbreviation match	Ens99 gene ID import through exact transcript match from gffcompare and abbreviation match
chr16	2814233	2818170	-	LL0000000185	acot22	acyl-CoA thioesterase 22	ENSDARG00000058945.5	553217	ZDB-GENE-110407-17	Entrez gene ID import through exact transcript match from gffcompare and abbreviation match	Ens99 gene ID import through exact transcript match from gffcompare and abbreviation match
chr8	46758260	46895195	-	LL0000000186	acot7	acyl-CoA thioesterase 7	ENSDARG00000018653.10	447878	ZDB-GENE-040912-42	Entrez gene ID import through exact transcript match from gffcompare and abbreviation match	Ens99 gene ID import through exact transcript match from gffcompare and abbreviation match
chr11	1512571	1520946	+	LL0000000187	acot8	acyl-CoA thioesterase 8	ENSDARG00000014138.8	450052	ZDB-GENE-041010-174	Entrez gene ID import through exact transcript match from gffcompare and abbreviation match	Ens99 gene ID import through exact transcript match from gffcompare and abbreviation match
chr24	21959708	21973365	-	LL0000000188	acot9.1	acyl-CoA thioesterase 9, tandem duplicate 1	ENSDARG00000058352.7	798073	ZDB-GENE-040724-139	Entrez gene ID import through exact transcript match from gffcompare and abbreviation match	Ens99 gene ID import through exact transcript match from gffcompare and abbreviation match
chr24	21938741	21952164	-	LL0000000189	acot9.2	acyl-CoA thioesterase 9, tandem duplicate 2	ENSDARG00000058390.4	798008	ZDB-GENE-051113-136	Entrez gene ID import through exact transcript match from gffcompare and abbreviation match	Ens99 gene ID import through exact transcript match from gffcompare and abbreviation match
chr6	23122660	23138502	+	LL0000000190	acox1	acyl-CoA oxidase 1, palmitoyl	ENSDARG00000014727.10	449662	ZDB-GENE-041010-219	Entrez gene ID import through exact transcript match from gffcompare and abbreviation match	Ens99 gene ID import through exact transcript match from gffcompare and abbreviation match
chr7	61760948	61806068	+	LL0000000191	acox3	acyl-CoA oxidase 3, pristanoyl	ENSDARG00000038865.7	406421	ZDB-GENE-040426-2163	partial transcript match; "j" class in gffcompare; abbreviation match	Ens99 gene ID import through exact transcript match from gffcompare and abbreviation match
chr13	47419331	47556494	-	LL0000000192	acoxl	acyl-CoA oxidase-like	ENSDARG00000020149.10	569104	ZDB-GENE-081107-18	Entrez gene ID import through exact transcript match from gffcompare and abbreviation match	Ens99 gene ID import through exact transcript match from gffcompare and abbreviation match
chr23	35504642	35537746	+	LL0000000193	acp1	acid phosphatase 1	ENSDARG00000076486.6	541489	ZDB-GENE-050327-12	Entrez gene ID import through exact transcript match from gffcompare and abbreviation match	Ens99 gene ID import through exact transcript match from gffcompare and abbreviation match
chr7	39360797	39377172	+	LL0000000194	acp2	acid phosphatase 2, lysosomal	ENSDARG00000007244.8	503759	ZDB-GENE-050306-40	Entrez gene ID import through exact transcript match from gffcompare and abbreviation match	Ens99 gene ID import through exact transcript match from gffcompare and abbreviation match
chr6	8354277	8362600	-	LL0000000195	acp5a	acid phosphatase 5a, tartrate resistant	ENSDARG00000019763.10	406801	ZDB-GENE-040426-2864	Entrez gene ID import through exact transcript match from gffcompare and abbreviation match	Ens99 gene ID import through exact transcript match from gffcompare and abbreviation match
chr24	31294019	31306724	-	LL0000000196	acp5b	acid phosphatase 5b, tartrate resistant	ENSDARG00000101456.2	436725	ZDB-GENE-040718-151	Entrez gene ID import through exact transcript match from gffcompare and abbreviation match	Ens99 gene ID import through exact transcript match from gffcompare and abbreviation match
chr9	30478734	30504543	+	LL0000000197	acp6	acid phosphatase 6, lysophosphatidic	ENSDARG00000040064.6	558758	ZDB-GENE-050208-290	Entrez gene ID import through exact transcript match from gffcompare and abbreviation match	Ens99 gene ID import through exact transcript match from gffcompare and abbreviation match
chrUn_KN150131v1	522	15756	+	LL0000000198	acp7	acid phosphatase 7, tartrate resistant (putative)	ENSDARG00000102421.2	571830	ZDB-GENE-070615-9	partial transcript overlap; "j" class in gffcompare; no abbreviation match	Ens99 gene ID import through exact transcript match from gffcompare and abbreviation match
chr25	25987854	26018424	-	LL0000000199	acsbg1	acyl-CoA synthetase bubblegum family member 1	ENSDARG00000062077.8	100006023	ZDB-GENE-110914-219	Entrez gene ID import through exact transcript match from gffcompare and abbreviation match	Ens99 gene ID import through exact transcript match from gffcompare and abbreviation match
chr8	20140321	20192225	+	LL0000000200	acsbg2	acyl-CoA synthetase bubblegum family member 2	ENSDARG00000004094.12	335159	ZDB-GENE-030131-7099	Entrez gene ID import through exact transcript match from gffcompare and abbreviation match	Ens99 gene ID import through exact transcript match from gffcompare and abbreviation match
chr12	26497166	26538823	-	LL0000000201	acsf2	acyl-CoA synthetase family member 2	ENSDARG00000061201.6	751707	ZDB-GENE-060825-7	Entrez gene ID import through exact transcript match from gffcompare and abbreviation match	Ens99 gene ID import through exact transcript match from gffcompare and abbreviation match
chr7	55950229	56038023	+	LL0000000202	ACSF3	acyl-CoA synthetase family member 3 [Source:NCBI gene;Acc:562292]	ENSDARG00000059503.7	562292		geneAbbrevConflict; gffcompare transcript match; overlap gene coordinates >90%	Ens99 gene ID import through exact transcript match from gffcompare and abbreviation match
chr1	17537322	17587630	-	LL0000000203	acsl1a	acyl-CoA synthetase long chain family member 1a	ENSDARG00000030514.8	555308	ZDB-GENE-050809-115	Entrez gene ID import through exact transcript match from gffcompare and abbreviation match	Ens99 gene ID import through exact transcript match from gffcompare and abbreviation match
chr14	937194	970853	-	LL0000000204	acsl1b	acyl-CoA synthetase long chain family member 1b	ENSDARG00000003854.9	445175	ZDB-GENE-040801-88	Entrez gene ID import through exact transcript match from gffcompare and abbreviation match	Ens99 gene ID import through exact transcript match from gffcompare and abbreviation match
chr8	50840565	50888806	-	LL0000000205	acsl2	acyl-CoA synthetase long chain family member 2	ENSDARG00000078399.5	100332846	ZDB-GENE-130530-851	Entrez gene ID import through exact transcript match from gffcompare and abbreviation match	Ens99 gene ID import through exact transcript match from gffcompare and abbreviation match
chr15	42994975	43086317	+	LL0000000206	acsl3a	acyl-CoA synthetase long chain family member 3a	ENSDARG00000032079.7	567157	ZDB-GENE-050420-181	Entrez gene ID import through exact transcript match from gffcompare and abbreviation match	Ens99 gene ID import through exact transcript match from gffcompare and abbreviation match
chr2	47471647	47516648	+	LL0000000207	acsl3b	acyl-CoA synthetase long chain family member 3b	ENSDARG00000014674.11	559656	ZDB-GENE-030131-492	Entrez gene ID import through exact transcript match from gffcompare and abbreviation match	Ens99 gene ID import through exact transcript match from gffcompare and abbreviation match
chr14	28438947	28459446	+	LL0000000208	acsl4a	acyl-CoA synthetase long chain family member 4a	ENSDARG00000004078.8	393622	ZDB-GENE-040426-1565	Entrez gene ID import through exact transcript match from gffcompare and abbreviation match	Ens99 gene ID import through exact transcript match from gffcompare and abbreviation match
chr5	23518291	23581355	-	LL0000000209	acsl4b	acyl-CoA synthetase long chain family member 4b	ENSDARG00000010752.8	334561	ZDB-GENE-030131-6493	Entrez gene ID import through exact transcript match from gffcompare and abbreviation match	Ens99 gene ID import through exact transcript match from gffcompare and abbreviation match
chr12	31438578	31461412	-	LL0000000210	acsl5	acyl-CoA synthetase long chain family member 5	ENSDARG00000075931.6	447860	ZDB-GENE-040912-169	Entrez gene ID import through exact transcript match from gffcompare and abbreviation match	Ens99 gene ID import through exact transcript match from gffcompare and abbreviation match
chr2	44724245	44747301	-	LL0000000211	acsm3	acyl-CoA synthetase medium chain family member 3	ENSDARG00000004880.8	100002035	ZDB-GENE-080220-22	Entrez gene ID import through exact transcript match from gffcompare and abbreviation match	Ens99 gene ID import through exact transcript match from gffcompare and abbreviation match
chr17	25833947	25853922	+	LL0000000212	acss1	acyl-CoA synthetase short chain family member 1	ENSDARG00000044142.8	541435	ZDB-GENE-050320-139	Entrez gene ID import through exact transcript match from gffcompare and abbreviation match	Ens99 gene ID import through exact transcript match from gffcompare and abbreviation match
chr23	9230431	9291892	+	LL0000000213	acss2	acyl-CoA synthetase short chain family member 2	ENSDARG00000037781.8	436914	ZDB-GENE-040718-388	Entrez gene ID import through exact transcript match from gffcompare and abbreviation match	Ens99 gene ID import through exact transcript match from gffcompare and abbreviation match
chr2	54583257	54640007	-	LL0000000214	acss2l	acyl-CoA synthetase short chain family member 2 like	ENSDARG00000069029.5	560020	ZDB-GENE-130530-723	Entrez gene ID import through exact transcript match from gffcompare and abbreviation match	Ens99 gene ID import through exact transcript match from gffcompare and abbreviation match
chr4	21866851	21958295	+	LL0000000215	acss3	acyl-CoA synthetase short chain family member 3	ENSDARG00000032218.11	566019	ZDB-GENE-060503-816	Entrez gene ID import through exact transcript match from gffcompare and abbreviation match	Ens99 gene ID import through exact transcript match from gffcompare and abbreviation match
chr1	53945934	53953532	+	LL0000000216	acta1a	actin alpha 1, skeletal muscle a	ENSDARG00000036371.5	550445	ZDB-GENE-050417-267	Entrez gene ID import through exact transcript match from gffcompare and abbreviation match	Ens99 gene ID import through exact transcript match from gffcompare and abbreviation match
chr13	24279021	24284442	+	LL0000000217	acta1b	actin alpha 1, skeletal muscle b	ENSDARG00000055618.5	407658	ZDB-GENE-030131-55	Entrez gene ID import through exact transcript match from gffcompare and abbreviation match	Ens99 gene ID import through exact transcript match from gffcompare and abbreviation match
chr12	17100021	17116481	+	LL0000000218	acta2	actin alpha 2, smooth muscle	ENSDARG00000045180.9	322509	ZDB-GENE-030131-1229	Entrez gene ID import through exact transcript match from gffcompare and abbreviation match	Ens99 gene ID import through exact transcript match from gffcompare and abbreviation match
chr1	8649099	8653385	-	LL0000000219	actb1	actin, beta 1	ENSDARG00000037746.7	57934	ZDB-GENE-000329-1	Entrez gene ID import through exact transcript match from gffcompare and abbreviation match	Ens99 gene ID import through exact transcript match from gffcompare and abbreviation match
chr3	40526107	40529804	-	LL0000000220	actb2	actin, beta 2	ENSDARG00000037870.6	57935	ZDB-GENE-000329-3	Entrez gene ID import through exact transcript match from gffcompare and abbreviation match	Ens99 gene ID import through exact transcript match from gffcompare and abbreviation match
chr20	29476853	29490438	-	LL0000039756	actc1a	actin alpha cardiac muscle 1a	ENSDARG00000042535.5	408256	ZDB-GENE-040520-4	Entrez gene ID import through exact transcript match from gffcompare and abbreviation match	Ens99 gene ID import through exact transcript match from gffcompare and abbreviation match		initially was multimapped;ie transcripts from two loci mapped to single gene ID
chr17	117024	125091	-	LL0000000222	actc1b	actin alpha cardiac muscle 1b	ENSDARG00000099197.3	58114	ZDB-GENE-000322-1	Entrez gene ID import through exact transcript match from gffcompare and abbreviation match	Ens99 gene ID import through exact transcript match from gffcompare and abbreviation match
chr25	14087045	14125509	+	LL0000000223	actc1c	actin alpha cardiac muscle 1c	ENSDARG00000079111.5	415164	ZDB-GENE-040625-46	exact transcript match; abbrev conflict, less than 50% gene coordinate overlap	Ens99 gene ID import through exact transcript match from gffcompare and abbreviation match
chr6	29386728	29395707	+	LL0000000224	actl6a	actin-like 6A	ENSDARG00000070828.6	192313	ZDB-GENE-020419-36	Entrez gene ID import through exact transcript match from gffcompare and abbreviation match	Ens99 gene ID import through exact transcript match from gffcompare and abbreviation match
chr23	44472414	44494591	-	LL0000000225	actl6b	actin-like 6B	ENSDARG00000034107.11	553775	ZDB-GENE-050522-191	Entrez gene ID import through exact transcript match from gffcompare and abbreviation match	Ens99 gene ID import through exact transcript match from gffcompare and abbreviation match
chr13	36321088	36391531	-	LL0000000226	actn1	actinin, alpha 1	ENSDARG00000007219.11	560400	ZDB-GENE-081113-4	Entrez gene ID import through exact transcript match from gffcompare and abbreviation match	Ens99 gene ID import through exact transcript match from gffcompare and abbreviation match
chrUn_KN149823v1	413	4903	+	LL0000000227	actn2a	actinin, alpha 2a		100538165	ZDB-GENE-141114-2	Entrez gene ID import through exact transcript match from gffcompare and abbreviation match	no overlapping transcript based on gffcompare
chr17	20119673	20143946	-	LL0000000228	actn2b	actinin, alpha 2b	ENSDARG00000071090.6	641575	ZDB-GENE-051127-39	Entrez gene ID import through exact transcript match from gffcompare and abbreviation match	Ens99 gene ID import through exact transcript match from gffcompare and abbreviation match
chr21	27382893	27404978	+	LL0000000229	actn3a	actinin alpha 3a	ENSDARG00000013755.7	58037	ZDB-GENE-000329-9	Entrez gene ID import through exact transcript match from gffcompare and abbreviation match	Ens99 gene ID import through exact transcript match from gffcompare and abbreviation match
chr7	6969733	7133475	+	LL0000000230	actn3b	actinin alpha 3b	ENSDARG00000001431.11	323320	ZDB-GENE-030131-2040	Entrez gene ID import through exact transcript match from gffcompare and abbreviation match	Ens99 gene ID import through exact transcript match from gffcompare and abbreviation match
chr15	43398289	43511719	+	LL0000000231	actn4	actinin, alpha 4	ENSDARG00000099786.2	322221	ZDB-GENE-030131-940	Entrez gene ID import through exact transcript match from gffcompare and abbreviation match	Ens99 gene ID import through exact transcript match from gffcompare and abbreviation match
chr10	42521943	42540839	+	LL0000000232	actr1	actin related protein 1, centractin	ENSDARG00000011611.10	406681	ZDB-GENE-040426-2695	Entrez gene ID import through exact transcript match from gffcompare and abbreviation match	Ens99 gene ID import through exact transcript match from gffcompare and abbreviation match
chr20	54274431	54286860	+	LL0000000233	actr10	actin related protein 10	ENSDARG00000038432.8	393139	ZDB-GENE-040426-768	Entrez gene ID import through exact transcript match from gffcompare and abbreviation match	Ens99 gene ID import through exact transcript match from gffcompare and abbreviation match
chr1	51407471	51428219	+	LL0000000234	actr2a	actin related protein 2a	ENSDARG00000052438.6	406820	ZDB-GENE-040426-2894	Entrez gene ID import through exact transcript match from gffcompare and abbreviation match	Ens99 gene ID import through exact transcript match from gffcompare and abbreviation match
chr13	5946372	5978458	-	LL0000000235	actr2b	actin related protein 2b	ENSDARG00000070076.6	554861	ZDB-GENE-050410-4	Entrez gene ID import through exact transcript match from gffcompare and abbreviation match	Ens99 gene ID import through exact transcript match from gffcompare and abbreviation match
chr9	56413986	56420087	-	LL0000000236	actr3	actin related protein 3	ENSDARG00000091138.3	406250	ZDB-GENE-040428-2	Entrez gene ID import through exact transcript match from gffcompare and abbreviation match	Ens99 gene ID import through exact transcript match from gffcompare and abbreviation match
chr24	7291510	7322188	-	LL0000000237	actr3b	actin related protein 3B	ENSDARG00000008790.12	100038776	ZDB-GENE-070424-10	Entrez gene ID import through exact transcript match from gffcompare and abbreviation match	Ens99 gene ID import through exact transcript match from gffcompare and abbreviation match
chr9	331425	340294	+	LL0000000238	actr5	actin related protein 5	ENSDARG00000098235.2	406809	ZDB-GENE-040426-2877	Entrez gene ID import through exact transcript match from gffcompare and abbreviation match	Ens99 gene ID import through exact transcript match from gffcompare and abbreviation match
chr25	19585318	19594092	-	LL0000000239	actr6	actin related protein 6	ENSDARG00000021370.9	324822	ZDB-GENE-030131-3543	Entrez gene ID import through exact transcript match from gffcompare and abbreviation match	Ens99 gene ID import through exact transcript match from gffcompare and abbreviation match
chr8	53517998	53535303	-	LL0000000240	actr8	actin related protein 8	ENSDARG00000103610.2	326866	ZDB-GENE-030131-5065	Entrez gene ID import through exact transcript match from gffcompare and abbreviation match	Ens99 gene ID import through exact transcript match from gffcompare and abbreviation match
chr23	27800519	27822921	-	LL0000000241	acvr1ba	activin A receptor type 1Ba	ENSDARG00000018968.9	30183	ZDB-GENE-980526-527	Entrez gene ID import through exact transcript match from gffcompare and abbreviation match	Ens99 gene ID import through exact transcript match from gffcompare and abbreviation match
chr6	2174082	2198771	+	LL0000000242	acvr1bb	activin A receptor type 1Bb	ENSDARG00000052142.7	559222	ZDB-GENE-131120-9	Entrez gene ID import through exact transcript match from gffcompare and abbreviation match	Ens99 gene ID import through exact transcript match from gffcompare and abbreviation match
chr9	5271524	5318889	-	LL0000000243	ACVR1C	activin A receptor type 1C [Source:NCBI gene;Acc:100331105]	ENSDARG00000086172.2	100331105		geneAbbrevConflict; gffcompare transcript match; overlap gene coordinates >90%	Ens99 gene ID import through exact transcript match from gffcompare and abbreviation match
chr2	41524199	41544469	+	LL0000000244	acvr1l	activin A receptor, type 1 like	ENSDARG00000014986.10	30615	ZDB-GENE-990415-9	Entrez gene ID import through exact transcript match from gffcompare and abbreviation match	Ens99 gene ID import through exact transcript match from gffcompare and abbreviation match
chr9	25380758	25444359	-	LL0000000245	acvr2aa	activin A receptor type 2Aa	ENSDARG00000011188.11	553359	ZDB-GENE-980526-227	Entrez gene ID import through exact transcript match from gffcompare and abbreviation match	Ens99 gene ID import through exact transcript match from gffcompare and abbreviation match
chr6	1724698	1746109	+	LL0000000246	acvr2ab	activin A receptor type 2Ab	ENSDARG00000104700.3	100331014	ZDB-GENE-120215-23	Entrez gene ID import through exact transcript match from gffcompare and abbreviation match	Ens99 gene ID import through exact transcript match from gffcompare and abbreviation match
chr24	41163845	41220740	-	LL0000000247	acvr2ba	activin A receptor type 2Ba	ENSDARG00000044422.8	30457	ZDB-GENE-980526-549	partial transcript overlap; "j" class in gffcompare; no abbreviation match	Ens99 gene ID import through exact transcript match from gffcompare and abbreviation match
chr2	51818039	51892047	+	LL0000000248	acvr2bb	activin A receptor type 2Bb	ENSDARG00000103108.3	100331938	ZDB-GENE-170621-5	geneAbbrevConflict; gffcompare transcript match; overlap gene coordinates >50%	Ens99 gene ID import through exact transcript match from gffcompare and abbreviation match
chr23	27835639	27857113	-	LL0000000249	acvrl1	activin A receptor like type 1	ENSDARG00000018179.12	266753	ZDB-GENE-021003-1	Entrez gene ID import through exact transcript match from gffcompare and abbreviation match	Ens99 gene ID import through exact transcript match from gffcompare and abbreviation match
chr22	36741262	36774243	-	LL0000000250	acy1	aminoacylase 1	ENSDARG00000111129.1	393970	ZDB-GENE-040426-755	Entrez gene ID import through exact transcript match from gffcompare and abbreviation match	Ens99 gene ID import through exact transcript match from gffcompare and abbreviation match
chr1	52499412	52505279	-	LL0000000251	acy3.1	aspartoacylase (aminocyclase) 3, tandem duplicate 1	ENSDARG00000093003.3	791456	ZDB-GENE-040718-345	Entrez gene ID import through exact transcript match from gffcompare and abbreviation match	Ens99 gene ID import through exact transcript match from gffcompare and abbreviation match
chr1	52489962	52498146	-	LL0000000252	acy3.2	aspartoacylase (aminocyclase) 3, tandem duplicate 2	ENSDARG00000005525.10	436619	ZDB-GENE-040718-37	Entrez gene ID import through exact transcript match from gffcompare and abbreviation match	Ens99 gene ID import through exact transcript match from gffcompare and abbreviation match
chr17	50244443	50248023	-	LL0000000253	acyp1	acylphosphatase 1, erythrocyte (common) type	ENSDARG00000060126.6	571263	ZDB-GENE-050309-125	Entrez gene ID import through exact transcript match from gffcompare and abbreviation match	Ens99 gene ID import through exact transcript match from gffcompare and abbreviation match
chr11	43101267	43118589	-	LL0000000254	acyp2	acylphosphatase 2, muscle type	ENSDARG00000086271.3	101886626	ZDB-GENE-130530-886	Entrez gene ID import through exact transcript match from gffcompare and abbreviation match	Ens99 gene ID import through exact transcript match from gffcompare and abbreviation match
chr23	25946448	25976656	-	LL0000000255	ada	adenosine deaminase	ENSDARG00000003113.8	436919	ZDB-GENE-040718-393	Entrez gene ID import through exact transcript match from gffcompare and abbreviation match	Ens99 gene ID import through exact transcript match from gffcompare and abbreviation match
chr25	16689633	16701185	+	LL0000000256	ada2a	adenosine deaminase 2a	ENSDARG00000051746.6	373884	ZDB-GENE-030902-4	Ens99 gene ID import through exact transcript match from gffcompare; abbrev conflict matches ZFIN alias	Ens99 gene ID import through exact transcript match from gffcompare and abbreviation match
chr4	5225552	5240128	-	LL0000000257	ada2b	adenosine deaminase 2b	ENSDARG00000015623.12	559295	ZDB-GENE-041210-77	Ens99 gene ID import through exact transcript match from gffcompare; abbrev conflict matches ZFIN alias	Ens99 gene ID import through exact transcript match from gffcompare and abbreviation match
chr14	1240235	1267206	+	LL0000000258	adad1	adenosine deaminase domain containing 1 (testis-specific)	ENSDARG00000089181.4	564818	ZDB-GENE-030131-6285	Entrez gene ID import through exact transcript match from gffcompare and abbreviation match	Ens99 gene ID import through exact transcript match from gffcompare and abbreviation match
chr7	24862471	24875421	-	LL0000000259	adad2	adenosine deaminase domain containing 2	ENSDARG00000105626.2	558824	ZDB-GENE-130530-788	Entrez gene ID import through exact transcript match from gffcompare and abbreviation match	Ens99 gene ID import through exact transcript match from gffcompare and abbreviation match
chr25	20567804	20577661	-	LL0000000260	adal	adenosine deaminase-like	ENSDARG00000012986.11	619263	ZDB-GENE-050913-145	Entrez gene ID import through exact transcript match from gffcompare and abbreviation match	Ens99 gene ID import through exact transcript match from gffcompare and abbreviation match
chr7	30406150	30492261	-	LL0000000261	adam10a	ADAM metallopeptidase domain 10a	ENSDARG00000053468.10	566044	ZDB-GENE-040917-2	Entrez gene ID import through exact transcript match from gffcompare and abbreviation match	Ens99 gene ID import through exact transcript match from gffcompare and abbreviation match
chr25	150468	160758	+	LL0000000262	adam10b	ADAM metallopeptidase domain 10b	ENSDARG00000015502.10	393392	ZDB-GENE-071115-1	Entrez gene ID import through exact transcript match from gffcompare and abbreviation match	Ens99 gene ID import through exact transcript match from gffcompare and abbreviation match
chr12	13807960	13887124	-	LL0000000263	adam11	ADAM metallopeptidase domain 11	ENSDARG00000079204.4	567145	ZDB-GENE-070808-3	Entrez gene ID import through exact transcript match from gffcompare and abbreviation match	Ens99 gene ID import through exact transcript match from gffcompare and abbreviation match
chr17	32158875	32336270	+	LL0000000264	adam12	ADAM metallopeptidase domain 12	ENSDARG00000079068.5	563275	ZDB-GENE-070809-1	Entrez gene ID import through exact transcript match from gffcompare and abbreviation match	Ens99 gene ID import through exact transcript match from gffcompare and abbreviation match
chr12	44910612	45120172	+	LL0000000265	ADAM12 (1 of many)	ADAM metallopeptidase domain 12 [Source:NCBI gene;Acc:101884222]	ENSDARG00000116062.1	101884222		geneAbbrevConflict; gffcompare transcript match; overlap gene coordinates >90%	Ens99 gene ID import by transcript match; but abbreviation conflict and limited gene overlap; may be complex gene structure or incorrect Ensembl assignment
chr16	28660410	28710021	-	LL0000000266	adam15	ADAM metallopeptidase domain 15	ENSDARG00000089213.4	795199	ZDB-GENE-070809-4	Entrez gene ID import through exact transcript match from gffcompare and abbreviation match	Ens99 gene ID import through exact transcript match from gffcompare and abbreviation match
chr17	35247497	35279422	-	LL0000000267	adam17a	ADAM metallopeptidase domain 17a	ENSDARG00000043213.4	324142	ZDB-GENE-030131-2862	Entrez gene ID import through exact transcript match from gffcompare and abbreviation match	Ens99 gene ID import through exact transcript match from gffcompare and abbreviation match
chr20	29586529	29618859	+	LL0000000268	adam17b	ADAM metallopeptidase domain 17b	ENSDARG00000093093.5	560657	ZDB-GENE-041001-199	Entrez gene ID import through exact transcript match from gffcompare and abbreviation match	Ens99 gene ID import through exact transcript match from gffcompare and abbreviation match
chr7	61302895	61533934	+	LL0000000269	adam19a	ADAM metallopeptidase domain 19a	ENSDARG00000059693.6	565342	ZDB-GENE-070813-1	Entrez gene ID import through exact transcript match from gffcompare and abbreviation match	Ens99 gene ID import through exact transcript match from gffcompare and abbreviation match
chr14	6546441	6614102	+	LL0000000270	adam19b	ADAM metallopeptidase domain 19b	ENSDARG00000067545.6	571252	ZDB-GENE-070705-541	Entrez gene ID import through exact transcript match from gffcompare and abbreviation match	Ens99 gene ID import through exact transcript match from gffcompare and abbreviation match
chr16	43152727	43289476	+	LL0000000271	adam22	ADAM metallopeptidase domain 22	ENSDARG00000060532.8	100126805	ZDB-GENE-070810-1	Entrez gene ID import through exact transcript match from gffcompare and abbreviation match	Ens99 gene ID import through exact transcript match from gffcompare and abbreviation match
chr6	13135817	13188667	-	LL0000000272	adam23a	ADAM metallopeptidase domain 23a	ENSDARG00000062323.7	794175	ZDB-GENE-070810-2	Entrez gene ID import through exact transcript match from gffcompare and abbreviation match	Ens99 gene ID import through exact transcript match from gffcompare and abbreviation match
chr5	27897504	27921026	+	LL0000000273	adam28	ADAM metallopeptidase domain 28	ENSDARG00000035514.8	767749	ZDB-GENE-060929-532	Entrez gene ID import through exact transcript match from gffcompare and abbreviation match	Ens99 gene ID import through exact transcript match from gffcompare and abbreviation match
chr13	24671481	24679636	+	LL0000000274	adam8a	ADAM metallopeptidase domain 8a	ENSDARG00000001452.7	368917	ZDB-GENE-030616-622	Entrez gene ID import through exact transcript match from gffcompare and abbreviation match	Ens99 gene ID import through exact transcript match from gffcompare and abbreviation match
chr12	9096963	9132826	-	LL0000000275	adam8b	ADAM metallopeptidase domain 8b	ENSDARG00000057644.7	100005593	ZDB-GENE-070808-1	Entrez gene ID import through exact transcript match from gffcompare and abbreviation match	Ens99 gene ID import through exact transcript match from gffcompare and abbreviation match
chr8	45849614	45939952	-	LL0000000276	adam9	ADAM metallopeptidase domain 9	ENSDARG00000010070.11	447940	ZDB-GENE-040912-127	Entrez gene ID import through exact transcript match from gffcompare and abbreviation match	Ens99 gene ID import through exact transcript match from gffcompare and abbreviation match
chr1	672103	684588	-	LL0000000277	adamts1	ADAM metallopeptidase with thrombospondin type 1 motif, 1	ENSDARG00000103519.2	565145	ZDB-GENE-070814-1	Entrez gene ID import through exact transcript match from gffcompare and abbreviation match	Ens99 gene ID import through exact transcript match from gffcompare and abbreviation match
chr8	20294790	20390999	-	LL0000000278	adamts10	ADAM metallopeptidase with thrombospondin type 1 motif, 10	ENSDARG00000075188.6	564734	ZDB-GENE-081104-414	Entrez gene ID import through exact transcript match from gffcompare and abbreviation match	Ens99 gene ID import through exact transcript match from gffcompare and abbreviation match
chr5	8832239	8910822	-	LL0000000279	adamts12	ADAM metallopeptidase with thrombospondin type 1 motif, 12	ENSDARG00000067549.5	100003937	ZDB-GENE-070705-471	Entrez gene ID import through exact transcript match from gffcompare and abbreviation match	Ens99 gene ID import through exact transcript match from gffcompare and abbreviation match
chr8	45226586	45279411	-	LL0000000280	adamts13	ADAM metallopeptidase with thrombospondin type 1 motif, 13	ENSDARG00000076270.7	100320289	ZDB-GENE-070814-7	Entrez gene ID import through exact transcript match from gffcompare and abbreviation match	Ens99 gene ID import through exact transcript match from gffcompare and abbreviation match
chr12	47965843	48076211	-	LL0000000281	adamts14	ADAM metallopeptidase with thrombospondin type 1 motif, 14	ENSDARG00000078494.4	101886422	ZDB-GENE-130530-852	geneAbbrevConflict; gffcompare transcript match; overlap gene coordinates >90%	Ens99 gene ID import through exact transcript match from gffcompare and abbreviation match
chr5	30178701	30211922	+	LL0000000282	adamts15a	ADAM metallopeptidase with thrombospondin type 1 motif, 15a	ENSDARG00000029124.9	569571	ZDB-GENE-060526-203	Entrez gene ID import through exact transcript match from gffcompare and abbreviation match	Ens99 gene ID import through exact transcript match from gffcompare and abbreviation match
chr15	17601480	17655833	+	LL0000000283	adamts15b	ADAM metallopeptidase with thrombospondin type 1 motif, 15b	ENSDARG00000058252.6	100002059	ZDB-GENE-070814-5	geneAbbrevConflict; gffcompare transcript match; overlap gene coordinates >50%	Ens99 gene ID import through exact transcript match from gffcompare and abbreviation match
chr16	1100524	1180216	+	LL0000000284	adamts16	ADAM metallopeptidase with thrombospondin type 1 motif, 16	ENSDARG00000074646.4	568792	ZDB-GENE-130530-760	geneAbbrevConflict; gffcompare transcript match; overlap gene coordinates >90%	Ens99 gene ID import through exact transcript match from gffcompare and abbreviation match
chr7	9981757	10257193	+	LL0000000285	adamts17	ADAM metallopeptidase with thrombospondin type 1 motif, 17	ENSDARG00000075555.5	101884120	ZDB-GENE-121030-7	partial transcript match; "j" class in gffcompare; abbreviation match	Ens99 gene ID import through exact transcript match from gffcompare and abbreviation match
chr7	42460222	42548136	+	LL0000000286	adamts18	ADAM metallopeptidase with thrombospondin type 1 motif, 18	ENSDARG00000001999.12	100150128	ZDB-GENE-070815-1	Entrez gene ID import through exact transcript match from gffcompare and abbreviation match	Ens99 gene ID import through exact transcript match from gffcompare and abbreviation match
chr21	32509215	32684839	-	LL0000000287	adamts2	ADAM metallopeptidase with thrombospondin type 1 motif, 2	ENSDARG00000075930.5	571682	ZDB-GENE-070816-3	Entrez gene ID import through exact transcript match from gffcompare and abbreviation match	Ens99 gene ID import through exact transcript match from gffcompare and abbreviation match
chr5	45322721	45536646	+	LL0000000288	adamts3	ADAM metallopeptidase with thrombospondin type 1 motif, 3	ENSDARG00000060127.7	102467218	ZDB-GENE-110223-1	Entrez gene ID import through exact transcript match from gffcompare and abbreviation match	Ens99 gene ID import through exact transcript match from gffcompare and abbreviation match
chr1	686860	731593	-	LL0000000289	adamts5	ADAM metallopeptidase with thrombospondin type 1 motif, 5 (aggrecanase-2)	ENSDARG00000100307.2	565053	ZDB-GENE-070814-2	Entrez gene ID import through exact transcript match from gffcompare and abbreviation match	Ens99 gene ID import through exact transcript match from gffcompare and abbreviation match
chr10	11593998	11761927	-	LL0000000290	adamts6	ADAM metallopeptidase with thrombospondin type 1 motif, 6	ENSDARG00000041982.9	569099	ZDB-GENE-091113-9	partial transcript match; "j" class in gffcompare; abbreviation match	Ens99 gene ID import through exact transcript match from gffcompare and abbreviation match
chr7	57146542	57332915	-	LL0000000291	ADAMTS7	ADAM metallopeptidase with thrombospondin type 1 motif 7 [Source:NCBI gene;Acc:560364]	ENSDARG00000102478.2	560364			Ens99 gene ID import through exact transcript match from gffcompare and abbreviation match
chr5	30153578	30177548	-	LL0000000292	adamts8a	ADAM metallopeptidase with thrombospondin type 1 motif, 8a	ENSDARG00000007709.10	569618	ZDB-GENE-060526-202	Entrez gene ID import through exact transcript match from gffcompare and abbreviation match	Ens99 gene ID import through exact transcript match from gffcompare and abbreviation match
chr11	19157879	19227802	+	LL0000000293	adamts9	ADAM metallopeptidase with thrombospondin type 1 motif, 9	ENSDARG00000077778.5	100333407	ZDB-GENE-070814-6	partial transcript match; "j" class in gffcompare; abbreviation match	Ens99 gene ID import through exact transcript match from gffcompare and abbreviation match
chr5	65880890	65932511	-	LL0000000294	adamtsl2	ADAMTS-like 2	ENSDARG00000074033.5	100537087	ZDB-GENE-070705-558	Entrez gene ID import through exact transcript match from gffcompare and abbreviation match	Ens99 gene ID import through exact transcript match from gffcompare and abbreviation match
chr7	12389866	12789251	-	LL0000000295	adamtsl3	ADAMTS-like 3	ENSDARG00000027903.10	100534944	ZDB-GENE-121030-8	Entrez gene ID import through exact transcript match from gffcompare and abbreviation match	Ens99 gene ID import through exact transcript match from gffcompare and abbreviation match
chr7	50475662	50517023	-	LL0000000296	adamtsl5	ADAMTS like 5	ENSDARG00000052118.5	101886605	ZDB-GENE-161017-76	Entrez gene ID import through exact transcript match from gffcompare and abbreviation match	Ens99 gene ID import through exact transcript match from gffcompare and abbreviation match
chr1	21576674	21599571	-	LL0000000297	adamtsl7	ADAMTS-like 7	ENSDARG00000055439.7	556634	ZDB-GENE-070816-2	Entrez gene ID import through exact transcript match from gffcompare and abbreviation match	Ens99 gene ID import through exact transcript match from gffcompare and abbreviation match
chr3	26267203	26282989	+	LL0000000298	adap2	ArfGAP with dual PH domains 2	ENSDARG00000070565.7	100331455	ZDB-GENE-070912-21	Entrez gene ID import through exact transcript match from gffcompare and abbreviation match	Ens99 gene ID import through exact transcript match from gffcompare and abbreviation match
chr16	23531563	23559539	+	LL0000000299	adar	adenosine deaminase RNA specific	ENSDARG00000012389.11	58119	ZDB-GENE-000616-5	Entrez gene ID import through exact transcript match from gffcompare and abbreviation match	Ens99 gene ID import through exact transcript match from gffcompare and abbreviation match
chr22	12641575	12693865	-	LL0000000300	adarb1a	adenosine deaminase RNA specific B1a	ENSDARG00000041609.8	58134	ZDB-GENE-000627-2	Entrez gene ID import through exact transcript match from gffcompare and abbreviation match	Ens99 gene ID import through exact transcript match from gffcompare and abbreviation match
chr9	45227028	45541367	+	LL0000000301	adarb1b	adenosine deaminase RNA specific B1b	ENSDARG00000003544.9	558759	ZDB-GENE-030219-15	partial transcript match; "j" class in gffcompare; abbreviation match	Ens99 gene ID import through exact transcript match from gffcompare and abbreviation match
chr24	3534216	3783497	-	LL0000000302	adarb2	adenosine deaminase RNA specific B2 (inactive)	ENSDARG00000071823.8	558149	ZDB-GENE-060503-160	Entrez gene ID import through exact transcript match from gffcompare and abbreviation match	Ens99 gene ID import through exact transcript match from gffcompare and abbreviation match
chr25	34811017	34835532	+	LL0000000303	adat1	adenosine deaminase tRNA specific 1	ENSDARG00000061348.6	792614	ZDB-GENE-070410-64	Entrez gene ID import through exact transcript match from gffcompare and abbreviation match	Ens99 gene ID import through exact transcript match from gffcompare and abbreviation match
chr20	37733181	37760501	-	LL0000000304	adat2	adenosine deaminase tRNA specific 2	ENSDARG00000041944.10	100034610	ZDB-GENE-041014-360	Entrez gene ID import through exact transcript match from gffcompare and abbreviation match	Ens99 gene ID import through exact transcript match from gffcompare and abbreviation match
chr9	41035925	41040492	-	LL0000000305	adat3	adenosine deaminase tRNA specific 3	ENSDARG00000005640.8	368634	ZDB-GENE-030616-531	Entrez gene ID import through exact transcript match from gffcompare and abbreviation match	Ens99 gene ID import through exact transcript match from gffcompare and abbreviation match
chr17	17491226	17759220	-	LL0000000306	adck1	aarF domain containing kinase 1	ENSDARG00000062561.7	100144553	ZDB-GENE-080401-5	Entrez gene ID import through exact transcript match from gffcompare and abbreviation match	Ens99 gene ID import through exact transcript match from gffcompare and abbreviation match
chr25	2645289	2664525	+	LL0000000307	adck2	aarF domain containing kinase 2	ENSDARG00000073923.4	572087	ZDB-GENE-131121-369	Entrez gene ID import through exact transcript match from gffcompare and abbreviation match	Ens99 gene ID import through exact transcript match from gffcompare and abbreviation match
chr19	11855249	11896479	+	LL0000000308	adck5	aarF domain containing kinase 5	ENSDARG00000075405.6	100001584	ZDB-GENE-081104-149	Entrez gene ID import through exact transcript match from gffcompare and abbreviation match	Ens99 gene ID import through exact transcript match from gffcompare and abbreviation match
chr20	6893472	7000232	-	LL0000000309	adcy1a	adenylate cyclase 1a	ENSDARG00000069026.5	557026	ZDB-GENE-070705-302	Entrez gene ID import through exact transcript match from gffcompare and abbreviation match	Ens99 gene ID import through exact transcript match from gffcompare and abbreviation match
chr2	132042	162810	-	LL0000000310	adcy1b	adenylate cyclase 1b	ENSDARG00000088634.4	569499	ZDB-GENE-100805-1	partial transcript match; "j" class in gffcompare; abbreviation match	Ens99 gene ID import through exact transcript match from gffcompare and abbreviation match
chr16	9275689	9383629	-	LL0000000311	adcy2a	adenylate cyclase 2a	ENSDARG00000058392.8	563724	ZDB-GENE-061109-1	partial transcript match; "j" class in gffcompare; abbreviation match	Ens99 gene ID import through exact transcript match from gffcompare and abbreviation match
chr19	27608927	27800969	-	LL0000000312	adcy2b	adenylate cyclase 2b (brain)	ENSDARG00000014588.12	557902	ZDB-GENE-060503-69	Entrez gene ID import through exact transcript match from gffcompare and abbreviation match	Ens99 gene ID import through exact transcript match from gffcompare and abbreviation match
chr16	2513122	2560784	-	LL0000000313	adcy3a	adenylate cyclase 3a	ENSDARG00000077145.5	571825	ZDB-GENE-111027-6	Entrez gene ID import through exact transcript match from gffcompare and abbreviation match	Ens99 gene ID import through exact transcript match from gffcompare and abbreviation match
chr20	46651916	46693942	+	LL0000000314	adcy3b	adenylate cyclase 3b	ENSDARG00000017437.9	564719	ZDB-GENE-041014-276	Entrez gene ID import through exact transcript match from gffcompare and abbreviation match	Ens99 gene ID import through exact transcript match from gffcompare and abbreviation match
chr9	37869837	38023666	-	LL0000000315	adcy5	adenylate cyclase 5	ENSDARG00000091342.3	562619	ZDB-GENE-081104-470	Entrez gene ID import through exact transcript match from gffcompare and abbreviation match	Ens99 gene ID import through exact transcript match from gffcompare and abbreviation match
chr23	13940958	14059085	-	LL0000000316	adcy6a	adenylate cyclase 6a	ENSDARG00000061445.8	570652	ZDB-GENE-060221-1	partial transcript match; "j" class in gffcompare; abbreviation match	Ens99 gene ID import through exact transcript match from gffcompare and abbreviation match
chr23	26794573	26888443	-	LL0000000317	adcy6b	adenylate cyclase 6b	ENSDARG00000027797.11	560807	ZDB-GENE-090127-2	partial transcript match; "j" class in gffcompare; abbreviation match	Ens99 gene ID import through exact transcript match from gffcompare and abbreviation match
chr7	37761524	37858666	-	LL0000000318	adcy7	adenylate cyclase 7	ENSDARG00000060070.8	568726	ZDB-GENE-040713-1	Entrez gene ID import through exact transcript match from gffcompare and abbreviation match	Ens99 gene ID import through exact transcript match from gffcompare and abbreviation match
chr2	42776014	42864472	-	LL0000000319	adcy8	adenylate cyclase 8 (brain)	ENSDARG00000031783.9	100148976	ZDB-GENE-070912-197	Entrez gene ID import through exact transcript match from gffcompare and abbreviation match	Ens99 gene ID import through exact transcript match from gffcompare and abbreviation match
chr22	26599101	26700284	+	LL0000000320	adcy9	adenylate cyclase 9	ENSDARG00000100869.2	100333702	ZDB-GENE-050208-455	Entrez gene ID import through exact transcript match from gffcompare and abbreviation match	Ens99 gene ID import through exact transcript match from gffcompare and abbreviation match
chr7	71547747	71558382	+	LL0000000321	adcyap1a	adenylate cyclase activating polypeptide 1a	ENSDARG00000004015.13	259257	ZDB-GENE-020809-4	Entrez gene ID import through exact transcript match from gffcompare and abbreviation match	Ens99 gene ID import through exact transcript match from gffcompare and abbreviation match
chr2	31296644	31302661	-	LL0000000322	adcyap1b	adenylate cyclase activating polypeptide 1b	ENSDARG00000027740.8	335625	ZDB-GENE-041010-89	Entrez gene ID import through exact transcript match from gffcompare and abbreviation match	Ens99 gene ID import through exact transcript match from gffcompare and abbreviation match
chr2	50821841	50900039	+	LL0000039757	adcyap1r1a	adenylate cyclase activating polypeptide 1a (pituitary) receptor type I	ENSDARG00000105201.2	541315	ZDB-GENE-050315-1	Entrez gene ID import through exact transcript match from gffcompare and abbreviation match	Ens99 gene ID import through exact transcript match from gffcompare and abbreviation match		initially was multimapped;ie transcripts from two loci mapped to single gene ID
chr6	32963884	33023771	-	LL0000039758	adcyap1r1b	adenylate cyclase activating polypeptide 1b (pituitary) receptor type I	ENSDARG00000053724.7	555473	ZDB-GENE-110127-1	Entrez gene ID import through exact transcript match from gffcompare and abbreviation match	geneAbbrevConflict; gffcompare transcript match; overlap gene coordinates >90%		initially was multimapped;ie transcripts from two loci mapped to single gene ID
chr21	1990279	2068071	-	LL0000000324	add1	adducin 1 (alpha)	ENSDARG00000103962.2	555511	ZDB-GENE-030909-2	Entrez gene ID import through exact transcript match from gffcompare and abbreviation match	Ens99 gene ID import through exact transcript match from gffcompare and abbreviation match
chr5	13781968	13835556	-	LL0000000325	add2	adducin 2 (beta)	ENSDARG00000074581.6	570147	ZDB-GENE-080718-4	Entrez gene ID import through exact transcript match from gffcompare and abbreviation match	Ens99 gene ID import through exact transcript match from gffcompare and abbreviation match
chr22	30046365	30272394	+	LL0000000326	add3a	adducin 3 (gamma) a	ENSDARG00000040874.9	556762	ZDB-GENE-030131-2721	Entrez gene ID import through exact transcript match from gffcompare and abbreviation match	Ens99 gene ID import through exact transcript match from gffcompare and abbreviation match
chr17	20245089	20287604	-	LL0000000327	add3b	adducin 3 (gamma) b	ENSDARG00000056250.7	553243	ZDB-GENE-080718-6	Entrez gene ID import through exact transcript match from gffcompare and abbreviation match	Ens99 gene ID import through exact transcript match from gffcompare and abbreviation match
chr20	31929377	32007209	-	LL0000000328	adgb	androglobin	ENSDARG00000005595.10	555435	ZDB-GENE-041001-205	Entrez gene ID import through exact transcript match from gffcompare and abbreviation match	Ens99 gene ID import through exact transcript match from gffcompare and abbreviation match
chr12	29131689	29211598	+	LL0000000329	adgra1a	adhesion G protein-coupled receptor A1a	ENSDARG00000054177.7	560847	ZDB-GENE-130603-101	Entrez gene ID import through exact transcript match from gffcompare and abbreviation match	Ens99 gene ID import through exact transcript match from gffcompare and abbreviation match
chr13	51054810	51125683	+	LL0000039759	adgra1a	adhesion G protein-coupled receptor A1a	ENSDARG00000054177.7	101884141	ZDB-GENE-130603-101	Ens99 gene ID import through exact transcript match from gffcompare; abbrev conflict matches ZFIN alias	Ens99 gene ID import based on gene abbreviation ONLY; may conflict with gene coordinates		same gene name at multiple loci
chr8	38023786	38159805	-	LL0000000330	adgra2	adhesion G protein-coupled receptor A2	ENSDARG00000076994.5	560700	ZDB-GENE-081104-363	Entrez gene ID import through exact transcript match from gffcompare and abbreviation match	Ens99 gene ID import through exact transcript match from gffcompare and abbreviation match
chr7	70266779	70334010	-	LL0000000331	adgra3	adhesion G protein-coupled receptor A3	ENSDARG00000073673.4	100003592	ZDB-GENE-131003-2	Entrez gene ID import through exact transcript match from gffcompare and abbreviation match	Ens99 gene ID import through exact transcript match from gffcompare and abbreviation match
chr16	37470711	37630250	+	LL0000000332	adgrb1a	adhesion G protein-coupled receptor B1a	ENSDARG00000075133.4	563527	ZDB-GENE-060607-12	Entrez gene ID import through exact transcript match from gffcompare and abbreviation match	Ens99 gene ID import through exact transcript match from gffcompare and abbreviation match
chr19	92570	107314	-	LL0000000333	adgrb1b	adhesion G protein-coupled receptor B1b	ENSDARG00000078529.7	100302472	ZDB-GENE-081031-45	Entrez gene ID import through exact transcript match from gffcompare and abbreviation match	Ens99 gene ID import through exact transcript match from gffcompare and abbreviation match
chr19	38733098	38872650	-	LL0000000334	adgrb2	adhesion G protein-coupled receptor B2	ENSDARG00000025667.10	556993	ZDB-GENE-060503-573	partial transcript match; "j" class in gffcompare; abbreviation match	Ens99 gene ID import through exact transcript match from gffcompare and abbreviation match
chr13	38301615	38594448	+	LL0000000335	adgrb3	adhesion G protein-coupled receptor B3	ENSDARG00000059832.8	566117	ZDB-GENE-070424-99	Entrez gene ID import through exact transcript match from gffcompare and abbreviation match	Ens99 gene ID import through exact transcript match from gffcompare and abbreviation match
chr8	43814821	43932276	-	LL0000000336	adgrd1	adhesion G protein-coupled receptor D1	ENSDARG00000053344.7	791731	ZDB-GENE-041212-24	Entrez gene ID import through exact transcript match from gffcompare and abbreviation match	Ens99 gene ID import through exact transcript match from gffcompare and abbreviation match
chr8	52770924	52829953	+	LL0000000337	adgrd2	adhesion G protein-coupled receptor D2	ENSDARG00000103067.2	571770	ZDB-GENE-081104-190	Entrez gene ID import through exact transcript match from gffcompare and abbreviation match	Ens99 gene ID import through exact transcript match from gffcompare and abbreviation match
chr1	55730205	55747003	+	LL0000000338	adgre10	adhesion G protein-coupled receptor E10	ENSDARG00000075855.6	569655	ZDB-GENE-090313-152	partial transcript match; "j" class in gffcompare; abbreviation match	Ens99 gene ID import through exact transcript match from gffcompare and abbreviation match
chr3	52392041	52405056	+	LL0000000339	adgre13	adhesion G protein-coupled receptor E13		100538238	ZDB-GENE-150505-3	partial transcript match; "j" class in gffcompare; abbreviation match	no overlapping transcript based on gffcompare
chr3	52145511	52166846	+	LL0000000340	adgre14	adhesion G protein-coupled receptor E14	ENSDARG00000056062.6	108182849	ZDB-GENE-131120-49	partial transcript match; "j" class in gffcompare; abbreviation match	Ens99 gene ID import through exact transcript match from gffcompare and abbreviation match
chr1	55563025	55574438	+	LL0000000341	adgre15	adhesion G protein-coupled receptor E15	ENSDARG00000096588.2	100536619	ZDB-GENE-121214-33	Entrez gene ID import through exact transcript match from gffcompare and abbreviation match	Ens99 gene ID import through exact transcript match from gffcompare and abbreviation match
chr1	55535827	55542745	+	LL0000000342	adgre16	adhesion G protein-coupled receptor E16	ENSDARG00000096622.2	110437794	ZDB-GENE-121214-46	partial transcript overlap; "j" class in gffcompare; no abbreviation match	Ens99 gene ID import through exact transcript match from gffcompare and abbreviation match
chr1	55723870	55728458	+	LL0000000343	adgre17	adhesion G protein-coupled receptor E17	ENSDARG00000095297.3	110439897	ZDB-GENE-090313-151	partial transcript overlap; "j" class in gffcompare; no abbreviation match	Ens99 gene ID import through exact transcript match from gffcompare and abbreviation match
chr1	55583116	55587666	+	LL0000000344	adgre19	adhesion G protein-coupled receptor E19	ENSDARG00000096649.2		ZDB-GENE-121214-34		Ens99 gene ID import through exact transcript match from gffcompare and abbreviation match
chr3	52467879	52471761	+	LL0000000345	adgre5a	adhesion G protein-coupled receptor E5a	ENSDARG00000026313.10		ZDB-GENE-130530-571		Ens99 gene ID import through exact transcript match from gffcompare and abbreviation match
chr1	58580245	58593061	-	LL0000000346	adgre5b.2	adhesion G protein-coupled receptor E5b, duplicate 2	ENSDARG00000104083.2	101882660	ZDB-GENE-121214-277	Entrez gene ID import through exact transcript match from gffcompare and abbreviation match	Ens99 gene ID import through exact transcript match from gffcompare and abbreviation match
chr1	58563957	58665225	-	LL0000000347	adgre5b.3	adhesion G protein-coupled receptor E5b, duplicate 3	ENSDARG00000112943.1	792970	ZDB-GENE-121214-275	Entrez gene ID import through exact transcript match from gffcompare and abbreviation match	Ens99 gene ID import through exact transcript match from gffcompare and abbreviation match
chr1	55643198	55646413	+	LL0000000348	adgre7	adhesion G protein-coupled receptor E7	ENSDARG00000041399.7		ZDB-GENE-121214-45		Ens99 gene ID import through exact transcript match from gffcompare and abbreviation match
chr1	55662491	55668390	+	LL0000000349	adgre8	adhesion G protein-coupled receptor E8	ENSDARG00000079050.5		ZDB-GENE-121214-35		Ens99 gene ID import through exact transcript match from gffcompare and abbreviation match
chr1	55478543	55518252	+	LL0000000350	adgre9	adhesion G protein-coupled receptor E9	ENSDARG00000096577.2	101883848	ZDB-GENE-121214-61	Entrez gene ID import through exact transcript match from gffcompare and abbreviation match	Ens99 gene ID import through exact transcript match from gffcompare and abbreviation match
chr20	35517535	35536676	-	LL0000000351	adgrf11	adhesion G protein-coupled receptor F11	ENSDARG00000075134.4	100537132	ZDB-GENE-121214-165	Entrez gene ID import through exact transcript match from gffcompare and abbreviation match	Ens99 gene ID import through exact transcript match from gffcompare and abbreviation match
chr17	6563307	6597829	+	LL0000000352	adgrf3a	adhesion G protein-coupled receptor F3a	ENSDARG00000087870.4	101886922	ZDB-GENE-131121-607	partial transcript match; "j" class in gffcompare; abbreviation match	Ens99 gene ID import through exact transcript match from gffcompare and abbreviation match
chr20	35495687	35512932	-	LL0000000353	adgrf3b	adhesion G protein-coupled receptor F3b	ENSDARG00000093008.4	565465	ZDB-GENE-041001-207	partial transcript match; "j" class in gffcompare; abbreviation match	Ens99 gene ID import through exact transcript match from gffcompare and abbreviation match
chr20	35568552	35700114	-	LL0000000354	adgrf6	adhesion G protein-coupled receptor F6	ENSDARG00000091757.5	565101	ZDB-GENE-041001-212	Entrez gene ID import through exact transcript match from gffcompare and abbreviation match	Ens99 gene ID import through exact transcript match from gffcompare and abbreviation match
chr20	35547832	35558396	-	LL0000000355	adgrf7	adhesion G protein-coupled receptor F7	ENSDARG00000086445.5	613165	ZDB-GENE-041001-214	partial transcript match; "j" class in gffcompare; abbreviation match	Ens99 gene ID import through exact transcript match from gffcompare and abbreviation match
chr20	35717406	35750810	-	LL0000000356	adgrf8	adhesion G protein-coupled receptor F8	ENSDARG00000093316.4	100537224	ZDB-GENE-130531-41	Entrez gene ID import through exact transcript match from gffcompare and abbreviation match	Ens99 gene ID import through exact transcript match from gffcompare and abbreviation match
chr7	28648706	28696716	-	LL0000000357	adgrg1	adhesion G protein-coupled receptor G1	ENSDARG00000105643.2	324948	ZDB-GENE-030131-3671	Entrez gene ID import through exact transcript match from gffcompare and abbreviation match	Ens99 gene ID import through exact transcript match from gffcompare and abbreviation match
chr20	46371458	46424162	+	LL0000000358	adgrg11	adhesion G protein-coupled receptor G11	ENSDARG00000041413.8	563883	ZDB-GENE-041210-320	partial transcript match; "j" class in gffcompare; abbreviation match	Ens99 gene ID import through exact transcript match from gffcompare and abbreviation match
chr24	25284902	25301757	-	LL0000000359	adgrg2a	adhesion G protein-coupled receptor G2a	ENSDARG00000088137.3	101882832	ZDB-GENE-140106-206	Entrez gene ID import through exact transcript match from gffcompare and abbreviation match	Ens99 gene ID import through exact transcript match from gffcompare and abbreviation match
chr7	64936903	64955976	+	LL0000000360	adgrg3	adhesion G protein-coupled receptor G3	ENSDARG00000074782.4	799479	ZDB-GENE-140106-110	Entrez gene ID import through exact transcript match from gffcompare and abbreviation match	Ens99 gene ID import through exact transcript match from gffcompare and abbreviation match
chr14	31721151	31751154	+	LL0000000361	adgrg4a	adhesion G protein-coupled receptor G4a	ENSDARG00000105416.2	793963	ZDB-GENE-121129-2	Entrez gene ID import through exact transcript match from gffcompare and abbreviation match	Ens99 gene ID import through exact transcript match from gffcompare and abbreviation match
chr10	26622891	26652749	+	LL0000000362	adgrg4b	adhesion G protein-coupled receptor G4b	ENSDARG00000094386.2	100331278	ZDB-GENE-091204-201	geneAbbrevConflict; gffcompare transcript match; overlap gene coordinates >90%	Ens99 gene ID import through exact transcript match from gffcompare and abbreviation match
chr20	37383034	37470398	+	LL0000000363	adgrg6	adhesion G protein-coupled receptor G6	ENSDARG00000054137.9	561970	ZDB-GENE-041014-357	Entrez gene ID import through exact transcript match from gffcompare and abbreviation match	Ens99 gene ID import through exact transcript match from gffcompare and abbreviation match
chr22	28587872	28603508	-	LL0000000364	adgrg7.1	adhesion G protein-coupled receptor G7, tandem duplicate 1	ENSDARG00000071088.6	101882620	ZDB-GENE-060503-894	Entrez gene ID import through exact transcript match from gffcompare and abbreviation match	Ens99 gene ID import through exact transcript match from gffcompare and abbreviation match
chr22	28610372	28624879	-	LL0000000365	adgrg7.2	adhesion G protein-coupled receptor G7, tandem duplicate 2	ENSDARG00000071085.6		ZDB-GENE-060503-46	No transcript match by gffcompare	Ens99 gene ID import through exact transcript match from gffcompare and abbreviation match
chr1	58690565	58698223	-	LL0000000366	adgrl1.1	adhesion G protein-coupled receptor L1.1		100334775	ZDB-GENE-130116-2	Entrez gene ID import through exact transcript match from gffcompare and abbreviation match	no overlapping transcript based on gffcompare
chr3	47496262	47876427	-	LL0000000367	adgrl1a	adhesion G protein-coupled receptor L1a	ENSDARG00000089292.4	562531	ZDB-GENE-131127-267	Entrez gene ID import through exact transcript match from gffcompare and abbreviation match	Ens99 gene ID import through exact transcript match from gffcompare and abbreviation match
chr11	7432533	7737642	+	LL0000000368	adgrl2a	adhesion G protein-coupled receptor L2a	ENSDARG00000069356.5	57987	ZDB-GENE-000607-49	Entrez gene ID import through exact transcript match from gffcompare and abbreviation match	Ens99 gene ID import through exact transcript match from gffcompare and abbreviation match
chr2	1714640	1814893	+	LL0000000369	adgrl2b.1	adhesion G protein-coupled receptor L2b, tandem duplicate 1	ENSDARG00000111712.1	110437953	ZDB-GENE-130116-4		Ens99 gene ID import through exact transcript match from gffcompare and abbreviation match
chr7	72879618	73089558	+	LL0000000370	ADGRL3	adhesion G protein-coupled receptor L3 [Source:HGNC Symbol;Acc:HGNC:20974]	ENSDARG00000090624.4			No transcript match by gffcompare	Ens99 gene ID import through exact transcript match from gffcompare and abbreviation match
chr1	22943546	23157716	-	LL0000000371	adgrl3.1	adhesion G protein-coupled receptor L3.1	ENSDARG00000061121.7	560631	ZDB-GENE-030131-7856	Entrez gene ID import through exact transcript match from gffcompare and abbreviation match	Ens99 gene ID import through exact transcript match from gffcompare and abbreviation match
chr11	7383177	7411436	-	LL0000000372	adgrl4	adhesion G protein-coupled receptor L4	ENSDARG00000013653.10	406676	ZDB-GENE-040426-2689	Entrez gene ID import through exact transcript match from gffcompare and abbreviation match	Ens99 gene ID import through exact transcript match from gffcompare and abbreviation match
chr5	48683336	48940242	+	LL0000000373	adgrv1	adhesion G protein-coupled receptor V1	ENSDARG00000021137.9	415105	ZDB-GENE-040624-6	Entrez gene ID import through exact transcript match from gffcompare and abbreviation match	Ens99 gene ID import through exact transcript match from gffcompare and abbreviation match
chr14	43590816	43602977	-	LL0000000374	adh5	alcohol dehydrogenase 5	ENSDARG00000080010.6	116517	ZDB-GENE-011003-1	Entrez gene ID import through exact transcript match from gffcompare and abbreviation match	Ens99 gene ID import through exact transcript match from gffcompare and abbreviation match
chr13	12653974	12660318	-	LL0000000375	adh8a	alcohol dehydrogenase 8a	ENSDARG00000091211.3	322482	ZDB-GENE-030529-3	Entrez gene ID import through exact transcript match from gffcompare and abbreviation match	Ens99 gene ID import through exact transcript match from gffcompare and abbreviation match
chr13	12633072	12646754	-	LL0000000376	adh8b	alcohol dehydrogenase 8b	ENSDARG00000024278.9	402841	ZDB-GENE-030529-2	Entrez gene ID import through exact transcript match from gffcompare and abbreviation match	Ens99 gene ID import through exact transcript match from gffcompare and abbreviation match
chr2	42095487	42109575	-	LL0000000377	adhfe1	alcohol dehydrogenase iron containing 1	ENSDARG00000053518.7	404618	ZDB-GENE-040426-2070	Entrez gene ID import through exact transcript match from gffcompare and abbreviation match	Ens99 gene ID import through exact transcript match from gffcompare and abbreviation match
chr17	51224421	51229737	+	LL0000000378	adi1	acireductone dioxygenase 1	ENSDARG00000020448.10	324079	ZDB-GENE-030131-2799	Entrez gene ID import through exact transcript match from gffcompare and abbreviation match	Ens99 gene ID import through exact transcript match from gffcompare and abbreviation match
chr24	26247751	26279392	+	LL0000000379	adipoqa	adiponectin, C1Q and collagen domain containing, a	ENSDARG00000062228.7	562602	ZDB-GENE-080423-2	Entrez gene ID import through exact transcript match from gffcompare and abbreviation match	Ens99 gene ID import through exact transcript match from gffcompare and abbreviation match
chr2	4489576	4496358	-	LL0000000380	adipoqb	adiponectin, C1Q and collagen domain containing, b	ENSDARG00000100086.2	751715	ZDB-GENE-060825-220	Entrez gene ID import through exact transcript match from gffcompare and abbreviation match	Ens99 gene ID import through exact transcript match from gffcompare and abbreviation match
chr11	24800015	24815193	+	LL0000000381	adipor1a	adiponectin receptor 1a	ENSDARG00000002912.11	436740	ZDB-GENE-040718-169	Entrez gene ID import through exact transcript match from gffcompare and abbreviation match	Ens99 gene ID import through exact transcript match from gffcompare and abbreviation match
chr8	28358161	28365547	+	LL0000000382	adipor1b	adiponectin receptor 1b	ENSDARG00000042717.6	406821	ZDB-GENE-040426-2896	Entrez gene ID import through exact transcript match from gffcompare and abbreviation match	Ens99 gene ID import through exact transcript match from gffcompare and abbreviation match
chr4	8670662	8707461	+	LL0000000383	adipor2	adiponectin receptor 2	ENSDARG00000101849.2	560140	ZDB-GENE-041210-60	Entrez gene ID import through exact transcript match from gffcompare and abbreviation match	Ens99 gene ID import through exact transcript match from gffcompare and abbreviation match
chr13	24918096	25199260	-	LL0000000384	adka	adenosine kinase a	ENSDARG00000039429.8	368220	ZDB-GENE-030425-3	Entrez gene ID import through exact transcript match from gffcompare and abbreviation match	Ens99 gene ID import through exact transcript match from gffcompare and abbreviation match
chr12	46841918	46868634	+	LL0000000385	adkb	adenosine kinase b	ENSDARG00000095947.4	322229	ZDB-GENE-030131-948	Entrez gene ID import through exact transcript match from gffcompare and abbreviation match	Ens99 gene ID import through exact transcript match from gffcompare and abbreviation match
chr4	9867920	9891874	-	LL0000000386	adm2a	adrenomedullin 2a	ENSDARG00000045708.8	403114	ZDB-GENE-041210-100	Entrez gene ID import through exact transcript match from gffcompare and abbreviation match	Ens99 gene ID import through exact transcript match from gffcompare and abbreviation match
chr18	6753074	6766681	-	LL0000000387	adm2b	adrenomedullin 2b	ENSDARG00000078875.5	100322075	ZDB-GENE-081104-279	Entrez gene ID import through exact transcript match from gffcompare and abbreviation match	Ens99 gene ID import through exact transcript match from gffcompare and abbreviation match
chr7	66874770	66877058	-	LL0000000388	adma	adrenomedullin a	ENSDARG00000015263.8	556502	ZDB-GENE-120221-5	Entrez gene ID import through exact transcript match from gffcompare and abbreviation match	Ens99 gene ID import through exact transcript match from gffcompare and abbreviation match
chr18	16798854	16801051	-	LL0000000389	admb	adrenomedullin b	ENSDARG00000069027.5	570100	ZDB-GENE-120221-6	Entrez gene ID import through exact transcript match from gffcompare and abbreviation match	Ens99 gene ID import through exact transcript match from gffcompare and abbreviation match
chr2	53483322	53500424	-	LL0000000390	admp	anti-dorsalizing morphogenic protein	ENSDARG00000025372.6	140619	ZDB-GENE-011214-1	Entrez gene ID import through exact transcript match from gffcompare and abbreviation match	Ens99 gene ID import through exact transcript match from gffcompare and abbreviation match
chr16	25371653	25380969	-	LL0000000391	adnp2a	ADNP homeobox 2a	ENSDARG00000060937.5	100007394	ZDB-GENE-040914-55	Entrez gene ID import through exact transcript match from gffcompare and abbreviation match	Ens99 gene ID import through exact transcript match from gffcompare and abbreviation match
chr19	20785699	20792473	+	LL0000000392	adnp2b	ADNP homeobox 2b	ENSDARG00000028431.6	564171	ZDB-GENE-030131-5930	Entrez gene ID import through exact transcript match from gffcompare and abbreviation match	Ens99 gene ID import through exact transcript match from gffcompare and abbreviation match
chr11	25403561	25408636	+	LL0000000393	adnpa	activity-dependent neuroprotector homeobox a	ENSDARG00000062002.5	564637	ZDB-GENE-061215-112	Entrez gene ID import through exact transcript match from gffcompare and abbreviation match	Ens99 gene ID import through exact transcript match from gffcompare and abbreviation match
chr23	20517798	20530056	+	LL0000000394	adnpb	activity-dependent neuroprotector homeobox b	ENSDARG00000074293.7	100330315	ZDB-GENE-030131-6385	Entrez gene ID import through exact transcript match from gffcompare and abbreviation match	Ens99 gene ID import through exact transcript match from gffcompare and abbreviation match
chr12	8474868	8476513	+	LL0000000395	adoa	2-aminoethanethiol (cysteamine) dioxygenase a	ENSDARG00000042827.6	494091	ZDB-GENE-041212-62	Entrez gene ID import through exact transcript match from gffcompare and abbreviation match	Ens99 gene ID import through exact transcript match from gffcompare and abbreviation match
chr17	43659940	43661745	+	LL0000000396	adob	2-aminoethanethiol (cysteamine) dioxygenase b	ENSDARG00000053571.5	406474	ZDB-GENE-040426-2267	Entrez gene ID import through exact transcript match from gffcompare and abbreviation match	Ens99 gene ID import on matching gene abbreviation and > 0.8 gene coordinate overlap using intersectBed
chr11	14664874	14669442	-	LL0000000397	adora1a	adenosine A1 receptor a	ENSDARG00000070056.5	100007535	ZDB-GENE-141216-102	geneAbbrevConflict; gffcompare transcript match; overlap gene coordinates >90%	Ens99 gene ID import through exact transcript match from gffcompare and abbreviation match
chr8	24117828	24136105	-	LL0000000398	adora1b	adenosine A1 receptor b	ENSDARG00000075694.4	100150997	ZDB-GENE-081105-156	Entrez gene ID import through exact transcript match from gffcompare and abbreviation match	Ens99 gene ID import through exact transcript match from gffcompare and abbreviation match
chr8	30663831	30684625	+	LL0000000399	adora2aa	adenosine A2a receptor a	ENSDARG00000033706.8	561701	ZDB-GENE-080723-28	Entrez gene ID import through exact transcript match from gffcompare and abbreviation match	Ens99 gene ID import through exact transcript match from gffcompare and abbreviation match
chr21	13293491	13314932	+	LL0000000400	adora2ab	adenosine A2a receptor b	ENSDARG00000058488.7	566118	ZDB-GENE-081022-41	Entrez gene ID import through exact transcript match from gffcompare and abbreviation match	Ens99 gene ID import through exact transcript match from gffcompare and abbreviation match
chr5	62773359	62801879	-	LL0000000401	adora2b	adenosine A2b receptor	ENSDARG00000002533.10	560100	ZDB-GENE-060511-1	Entrez gene ID import through exact transcript match from gffcompare and abbreviation match	Ens99 gene ID import through exact transcript match from gffcompare and abbreviation match
chr25	2705054	2724033	-	LL0000000402	adpgk	ADP-dependent glucokinase	ENSDARG00000063525.8	557919	ZDB-GENE-061103-421	Entrez gene ID import through exact transcript match from gffcompare and abbreviation match	Ens99 gene ID import through exact transcript match from gffcompare and abbreviation match
chr17	11443643	11466735	-	LL0000000403	adpgk2	ADP-dependent glucokinase 2	ENSDARG00000062785.6	566398	ZDB-GENE-090609-3	Entrez gene ID import through exact transcript match from gffcompare and abbreviation match	Ens99 gene ID import through exact transcript match from gffcompare and abbreviation match
chr12	15148618	15196223	+	LL0000000404	adprh	ADP-ribosylarginine hydrolase	ENSDARG00000040712.7	445059	ZDB-GENE-040801-190	Entrez gene ID import through exact transcript match from gffcompare and abbreviation match	Ens99 gene ID import through exact transcript match from gffcompare and abbreviation match
chr1	197236	206299	-	LL0000000405	adprhl1	ADP-ribosylhydrolase like 1	ENSDARG00000041589.7	450012	ZDB-GENE-041010-126	Entrez gene ID import through exact transcript match from gffcompare and abbreviation match	Ens99 gene ID import through exact transcript match from gffcompare and abbreviation match
chr17	31611854	31619274	+	LL0000000406	adprhl2	ADP-ribosylhydrolase like 2 [Source:ZFIN;Acc:ZDB-GENE-040912-85]	ENSDARG00000019338.10	796446	ZDB-GENE-040912-85	Entrez gene ID import through exact transcript match from gffcompare and abbreviation match	Ens99 gene ID import through exact transcript match from gffcompare and abbreviation match
chr12	288105	291317	-	LL0000000407	adprm	ADP-ribose/CDP-alcohol diphosphatase, manganese-dependent	ENSDARG00000026090.9	393393	ZDB-GENE-040426-1406	Entrez gene ID import through exact transcript match from gffcompare and abbreviation match	Ens99 gene ID import through exact transcript match from gffcompare and abbreviation match
chr8	5024468	5083714	-	LL0000000408	adra1aa	adrenoceptor alpha 1Aa	ENSDARG00000028725.9	798498	ZDB-GENE-030131-2831	Entrez gene ID import through exact transcript match from gffcompare and abbreviation match	Ens99 gene ID import through exact transcript match from gffcompare and abbreviation match
chr10	18998109	19011934	-	LL0000000409	adra1ab	adrenoceptor alpha 1Ab	ENSDARG00000027638.10	557259	ZDB-GENE-060503-384	Entrez gene ID import through exact transcript match from gffcompare and abbreviation match	Ens99 gene ID import through exact transcript match from gffcompare and abbreviation match
chr21	29226102	29251317	+	LL0000000410	adra1ba	adrenoceptor alpha 1Ba	ENSDARG00000011317.9	100149100	ZDB-GENE-120510-1	Entrez gene ID import through exact transcript match from gffcompare and abbreviation match	Ens99 gene ID import through exact transcript match from gffcompare and abbreviation match
chr14	43554490	43573654	+	LL0000000411	adra1bb	adrenoceptor alpha 1Bb	ENSDARG00000041173.6	492486	ZDB-GENE-041114-51	Entrez gene ID import through exact transcript match from gffcompare and abbreviation match	Ens99 gene ID import through exact transcript match from gffcompare and abbreviation match
chr1	41957210	41982582	-	LL0000000412	adra1d	adrenoceptor alpha 1D	ENSDARG00000024101.9	568614	ZDB-GENE-090312-203	Entrez gene ID import through exact transcript match from gffcompare and abbreviation match	Ens99 gene ID import through exact transcript match from gffcompare and abbreviation match
chr22	29583588	29586609	-	LL0000000413	adra2a	adrenoceptor alpha 2A	ENSDARG00000040841.5	266750	ZDB-GENE-021010-1	Entrez gene ID import through exact transcript match from gffcompare and abbreviation match	Ens99 gene ID import through exact transcript match from gffcompare and abbreviation match
chr8	40643781	40649175	+	LL0000000414	adra2b	adrenoceptor alpha 2B	ENSDARG00000102096.2	266751	ZDB-GENE-021010-2	Entrez gene ID import through exact transcript match from gffcompare and abbreviation match	Ens99 gene ID import through exact transcript match from gffcompare and abbreviation match
chr1	40991659	40994520	-	LL0000000415	adra2c	adrenoceptor alpha 2C	ENSDARG00000069669.5	266752	ZDB-GENE-021010-3	Entrez gene ID import through exact transcript match from gffcompare and abbreviation match	Ens99 gene ID import through exact transcript match from gffcompare and abbreviation match
chr14	790157	793581	+	LL0000000416	adra2da	adrenergic, alpha-2D-, receptor a	ENSDARG00000091277.3	266754	ZDB-GENE-021010-4	Entrez gene ID import through exact transcript match from gffcompare and abbreviation match	Ens99 gene ID import through exact transcript match from gffcompare and abbreviation match
chr21	32819833	32821422	+	LL0000000417	adra2db	adrenergic, alpha-2D-, receptor b	ENSDARG00000054667.5	266755	ZDB-GENE-021010-5	Entrez gene ID import through exact transcript match from gffcompare and abbreviation match	Ens99 gene ID import through exact transcript match from gffcompare and abbreviation match
chr12	30440230	30443615	-	LL0000000418	adrb1	adrenoceptor beta 1	ENSDARG00000007490.9	557194	ZDB-GENE-081022-145	Entrez gene ID import through exact transcript match from gffcompare and abbreviation match	Ens99 gene ID import through exact transcript match from gffcompare and abbreviation match
chr14	34825465	34830615	-	LL0000000419	adrb2a	adrenoceptor beta 2, surface a	ENSDARG00000088124.3	565838	ZDB-GENE-100414-3	partial transcript match; "j" class in gffcompare; abbreviation match	Ens99 gene ID import through exact transcript match from gffcompare and abbreviation match
chr21	35078763	35082729	-	LL0000000420	adrb2b	adrenoceptor beta 2, surface b	ENSDARG00000054510.5	100037315	ZDB-GENE-070410-32	Entrez gene ID import through exact transcript match from gffcompare and abbreviation match	Ens99 gene ID import through exact transcript match from gffcompare and abbreviation match
chr8	37700090	37738751	+	LL0000000421	adrb3a	adrenoceptor beta 3a	ENSDARG00000053646.7	558248	ZDB-GENE-080917-21	Entrez gene ID import through exact transcript match from gffcompare and abbreviation match	Ens99 gene ID import through exact transcript match from gffcompare and abbreviation match
chr10	41199660	41214668	+	LL0000000422	adrb3b	adrenoceptor beta 3b	ENSDARG00000052919.7	792519	ZDB-GENE-081022-154	Entrez gene ID import through exact transcript match from gffcompare and abbreviation match	Ens99 gene ID import through exact transcript match from gffcompare and abbreviation match
chr23	9560797	9567306	+	LL0000000423	adrm1	adhesion regulating molecule 1	ENSDARG00000058560.9	796450	ZDB-GENE-040426-905	Entrez gene ID import through exact transcript match from gffcompare and abbreviation match	Ens99 gene ID import through exact transcript match from gffcompare and abbreviation match
chr3	24207243	24218627	+	LL0000000424	adsl	adenylosuccinate lyase	ENSDARG00000017049.13	334431	ZDB-GENE-030131-6363	Entrez gene ID import through exact transcript match from gffcompare and abbreviation match	Ens99 gene ID import through exact transcript match from gffcompare and abbreviation match
chr13	11450538	11537012	-	LL0000000425	adss	adenylosuccinate synthase [Source:ZFIN;Acc:ZDB-GENE-050417-337]	ENSDARG00000002071.7	550502	ZDB-GENE-050417-337	Entrez gene ID import through exact transcript match from gffcompare and abbreviation match	geneAbbrev conflict with Ens99 but matches ZFIN alias
chr21	26522571	26531535	+	LL0000000426	adssl	adenylosuccinate synthase, like	ENSDARG00000012399.9	192305	ZDB-GENE-020419-28	Entrez gene ID import through exact transcript match from gffcompare and abbreviation match	Ens99 gene ID import through exact transcript match from gffcompare and abbreviation match
chr17	1323589	1356446	+	LL0000000427	adssl1	adenylosuccinate synthase like 1 [Source:ZFIN;Acc:ZDB-GENE-040516-18]	ENSDARG00000099517.2	407989	ZDB-GENE-040516-18	Entrez gene ID import through exact transcript match from gffcompare and abbreviation match	geneAbbrev conflict with Ens99 but matches ZFIN alias
chr23	4362152	4368276	+	LL0000000428	adtrp1	androgen dependent TFPI regulating protein 1	ENSDARG00000037810.7	550414	ZDB-GENE-050417-220	Ens99 gene ID import through exact transcript match from gffcompare; abbrev conflict matches ZFIN alias	Ens99 gene ID import through exact transcript match from gffcompare and abbreviation match
chr10	2807136	2838190	+	LL0000000429	aebp1	AE binding protein 1	ENSDARG00000091726.4	793308	ZDB-GENE-030131-2390	Entrez gene ID import through exact transcript match from gffcompare and abbreviation match	Ens99 gene ID import through exact transcript match from gffcompare and abbreviation match
chr4	2921902	2945306	-	LL0000000430	aebp2	AE binding protein 2	ENSDARG00000006038.10	406815	ZDB-GENE-040426-2885	Entrez gene ID import through exact transcript match from gffcompare and abbreviation match	Ens99 gene ID import through exact transcript match from gffcompare and abbreviation match
chr7	8373025	8374950	-	LL0000000431	aep1	aerolysin-like protein	ENSDARG00000039099.7	503710	ZDB-GENE-050306-5	Entrez gene ID import through exact transcript match from gffcompare and abbreviation match	Ens99 gene ID import through exact transcript match from gffcompare and abbreviation match
chr22	21793408	21845733	-	LL0000000432	aes	amino-terminal enhancer of split [Source:ZFIN;Acc:ZDB-GENE-040426-1409]	ENSDARG00000021805.7	393395	ZDB-GENE-040426-1409	Entrez gene ID import through exact transcript match from gffcompare and abbreviation match	geneAbbrev conflict with Ens99 but matches ZFIN alias
chr12	22823183	22918768	+	LL0000000433	afap1	actin filament associated protein 1	ENSDARG00000055284.7	568356	ZDB-GENE-100316-6	Entrez gene ID import through exact transcript match from gffcompare and abbreviation match	Ens99 gene ID import through exact transcript match from gffcompare and abbreviation match
chr14	34562426	34633960	-	LL0000000434	afap1l1a	actin filament associated protein 1-like 1a	ENSDARG00000089162.5	566757	ZDB-GENE-050913-76	Entrez gene ID import through exact transcript match from gffcompare and abbreviation match	Ens99 gene ID import through exact transcript match from gffcompare and abbreviation match
chr21	30418029	30467920	-	LL0000000435	afap1l1b	actin filament associated protein 1-like 1b	ENSDARG00000056453.8	768144	ZDB-GENE-061013-428	Entrez gene ID import through exact transcript match from gffcompare and abbreviation match	Ens99 gene ID import through exact transcript match from gffcompare and abbreviation match
chr12	30233977	30308356	+	LL0000000436	afap1l2	actin filament associated protein 1-like 2	ENSDARG00000074806.4	567369	ZDB-GENE-100318-1	Entrez gene ID import through exact transcript match from gffcompare and abbreviation match	Ens99 gene ID import through exact transcript match from gffcompare and abbreviation match
chr20	43120132	43353097	-	LL0000000437	afdna	afadin, adherens junction formation factor a	ENSDARG00000029472.11	558359	ZDB-GENE-050419-52	partial transcript overlap; "j" class in gffcompare; no abbreviation match	Ens99 gene ID import through exact transcript match from gffcompare and abbreviation match
chr21	180490	184558	+	LL0000000438	aff1	AF4/FMR2 family, member 1		100537394	ZDB-GENE-110228-2	Entrez gene ID import through exact transcript match from gffcompare and abbreviation match	no overlapping transcript based on gffcompare
chr14	20342508	20736925	+	LL0000000439	aff2	AF4/FMR2 family, member 2	ENSDARG00000052242.7	100330019	ZDB-GENE-110411-190	Entrez gene ID import through exact transcript match from gffcompare and abbreviation match	Ens99 gene ID import through exact transcript match from gffcompare and abbreviation match
chr9	21490654	21526653	-	LL0000000440	aff3	AF4/FMR2 family, member 3	ENSDARG00000079575.6	570215	ZDB-GENE-030219-193	Entrez gene ID import through exact transcript match from gffcompare and abbreviation match	Ens99 gene ID import through exact transcript match from gffcompare and abbreviation match
chr21	43178776	43251734	+	LL0000000441	aff4	AF4/FMR2 family, member 4	ENSDARG00000001857.11	556421	ZDB-GENE-100910-5	Entrez gene ID import through exact transcript match from gffcompare and abbreviation match	Ens99 gene ID import through exact transcript match from gffcompare and abbreviation match
chr17	6765621	6789670	+	LL0000000442	afg1la	AFG1 like ATPase a	ENSDARG00000011466.10	561238	ZDB-GENE-091006-2	Entrez gene ID import through exact transcript match from gffcompare and abbreviation match	Ens99 gene ID import through exact transcript match from gffcompare and abbreviation match
chr20	32337364	32405451	-	LL0000000443	afg1lb	AFG1 like ATPase b	ENSDARG00000042902.7	555926	ZDB-GENE-041014-178	Entrez gene ID import through exact transcript match from gffcompare and abbreviation match	Ens99 gene ID import through exact transcript match from gffcompare and abbreviation match
chr2	21448344	21470014	+	LL0000000444	afg3l2	AFG3-like AAA ATPase 2	ENSDARG00000062272.8	569168	ZDB-GENE-070912-46	Entrez gene ID import through exact transcript match from gffcompare and abbreviation match	Ens99 gene ID import through exact transcript match from gffcompare and abbreviation match
chr11	45139300	45153006	-	LL0000000445	afmid	arylformamidase	ENSDARG00000099106.3	550372	ZDB-GENE-050417-166	Entrez gene ID import through exact transcript match from gffcompare and abbreviation match	Ens99 gene ID import through exact transcript match from gffcompare and abbreviation match
chr16	45904153	45923942	-	LL0000000446	afp4	antifreeze protein type IV	ENSDARG00000095863.2	568707	ZDB-GENE-030131-5217	Entrez gene ID import through exact transcript match from gffcompare and abbreviation match	Ens99 gene ID import through exact transcript match from gffcompare and abbreviation match
chr1	55095285	55110990	+	LL0000000447	aftpha	aftiphilin a	ENSDARG00000069249.8	556043	ZDB-GENE-030131-1437	Entrez gene ID import through exact transcript match from gffcompare and abbreviation match	Ens99 gene ID import through exact transcript match from gffcompare and abbreviation match
chr17	24569862	24587737	-	LL0000000448	aftphb	aftiphilin b	ENSDARG00000071347.5	100004990	ZDB-GENE-060503-388	Entrez gene ID import through exact transcript match from gffcompare and abbreviation match	Ens99 gene ID import through exact transcript match from gffcompare and abbreviation match
chr14	36428432	36437249	-	LL0000000449	aga	aspartylglucosaminidase	ENSDARG00000004889.10	566517	ZDB-GENE-040426-2311	Entrez gene ID import through exact transcript match from gffcompare and abbreviation match	Ens99 gene ID import through exact transcript match from gffcompare and abbreviation match
chr6	16043318	16394528	-	LL0000000450	agap1	ArfGAP with GTPase domain, ankyrin repeat and PH domain 1	ENSDARG00000062123.8	100148154	ZDB-GENE-130405-1	Entrez gene ID import through exact transcript match from gffcompare and abbreviation match	Ens99 gene ID import through exact transcript match from gffcompare and abbreviation match
chr23	36675207	36724575	-	LL0000000451	agap2	ArfGAP with GTPase domain, ankyrin repeat and PH domain 2	ENSDARG00000099874.2	565109	ZDB-GENE-061103-343	Entrez gene ID import through exact transcript match from gffcompare and abbreviation match	Ens99 gene ID import through exact transcript match from gffcompare and abbreviation match
chr24	34135209	34949655	-	LL0000000452	agap3	ArfGAP with GTPase domain, ankyrin repeat and PH domain 3	ENSDARG00000087822.3	324332	ZDB-GENE-110927-1	Entrez gene ID import through exact transcript match from gffcompare and abbreviation match	Ens99 gene ID import through exact transcript match from gffcompare and abbreviation match
chr25	11389220	11706389	+	LL0000000453	AGBL1	si:ch73-141f14.1 [Source:ZFIN;Acc:ZDB-GENE-131127-336]	ENSDARG00000104384.2	100536841	ZDB-GENE-110207-1	partial transcript overlap; "j" class in gffcompare; no abbreviation match	geneAbbrev conflict with Ens99 but matches ZFIN alias
chr25	28596958	28638145	-	LL0000000454	agbl2	ATP/GTP binding protein-like 2	ENSDARG00000079983.5	568152	ZDB-GENE-070719-6	Entrez gene ID import through exact transcript match from gffcompare and abbreviation match	Ens99 gene ID import through exact transcript match from gffcompare and abbreviation match
chr8	15311289	15991801	-	LL0000000455	agbl4	ATP/GTP binding protein-like 4	ENSDARG00000110838.1	550450	ZDB-GENE-081104-437	Entrez gene ID import through exact transcript match from gffcompare and abbreviation match	Ens99 gene ID import through exact transcript match from gffcompare and abbreviation match
chr4	737539	760615	-	LL0000000456	agbl5	ATP/GTP binding protein-like 5	ENSDARG00000045900.6	445479	ZDB-GENE-040822-29	Entrez gene ID import through exact transcript match from gffcompare and abbreviation match	Ens99 gene ID import through exact transcript match from gffcompare and abbreviation match
chr15	35156413	35212809	-	LL0000000457	agfg1a	ArfGAP with FG repeats 1a	ENSDARG00000030020.9	327597	ZDB-GENE-030131-5808	Entrez gene ID import through exact transcript match from gffcompare and abbreviation match	Ens99 gene ID import through exact transcript match from gffcompare and abbreviation match
chr2	16460305	16479360	+	LL0000000458	agfg1b	ArfGAP with FG repeats 1b	ENSDARG00000019526.11	393560	ZDB-GENE-040426-1520	Entrez gene ID import through exact transcript match from gffcompare and abbreviation match	Ens99 gene ID import through exact transcript match from gffcompare and abbreviation match
chr21	7741780	7781730	-	LL0000000459	aggf1	angiogenic factor with G patch and FHA domains 1	ENSDARG00000060109.6	559905	ZDB-GENE-060929-836	Entrez gene ID import through exact transcript match from gffcompare and abbreviation match	Ens99 gene ID import through exact transcript match from gffcompare and abbreviation match
chr18	20532618	20540709	+	LL0000000460	agk	acylglycerol kinase	ENSDARG00000009837.6	334270	ZDB-GENE-030131-6202	Entrez gene ID import through exact transcript match from gffcompare and abbreviation match	Ens99 gene ID import through exact transcript match from gffcompare and abbreviation match
chr2	20472102	20526842	+	LL0000000461	agla	amylo-alpha-1, 6-glucosidase, 4-alpha-glucanotransferase a	ENSDARG00000103811.3	567798	ZDB-GENE-071004-6	Entrez gene ID import through exact transcript match from gffcompare and abbreviation match	Ens99 gene ID import through exact transcript match from gffcompare and abbreviation match
chr24	29783638	29868151	-	LL0000000462	aglb	amylo-alpha-1, 6-glucosidase, 4-alpha-glucanotransferase b	ENSDARG00000100352.2	553352	ZDB-GENE-050309-54	Entrez gene ID import through exact transcript match from gffcompare and abbreviation match	Ens99 gene ID import through exact transcript match from gffcompare and abbreviation match
chr23	37482727	37490252	+	LL0000000463	agmat	agmatine ureohydrolase (agmatinase)	ENSDARG00000059700.6	556522	ZDB-GENE-060929-696	Entrez gene ID import through exact transcript match from gffcompare and abbreviation match	Ens99 gene ID import through exact transcript match from gffcompare and abbreviation match
chr15	34334721	34418525	-	LL0000000464	agmo	alkylglycerol monooxygenase	ENSDARG00000025595.9	405819	ZDB-GENE-040426-2207	Entrez gene ID import through exact transcript match from gffcompare and abbreviation match	Ens99 gene ID import through exact transcript match from gffcompare and abbreviation match
chr16	51077086	51152123	-	LL0000000465	ago1	argonaute RISC component 1	ENSDARG00000092644.4	570775	ZDB-GENE-110606-3	Entrez gene ID import through exact transcript match from gffcompare and abbreviation match	Ens99 gene ID import through exact transcript match from gffcompare and abbreviation match
chr19	41479804	41506396	+	LL0000000466	ago2	argonaute RISC catalytic component 2	ENSDARG00000061268.6	570630	ZDB-GENE-110606-6	Entrez gene ID import through exact transcript match from gffcompare and abbreviation match	Ens99 gene ID import through exact transcript match from gffcompare and abbreviation match
chr16	51001810	51072885	-	LL0000000467	ago3a	argonaute RISC catalytic component 3a	ENSDARG00000059888.6	567622	ZDB-GENE-051107-16	geneAbbrevConflict; gffcompare transcript match; overlap gene coordinates >90%	Ens99 gene ID import through exact transcript match from gffcompare and abbreviation match
chr19	10661166	10690397	+	LL0000000468	ago3b	argonaute RISC catalytic component 3b	ENSDARG00000063079.8	568159	ZDB-GENE-060503-452	Entrez gene ID import through exact transcript match from gffcompare and abbreviation match	Ens99 gene ID import through exact transcript match from gffcompare and abbreviation match
chr19	47797940	47832882	-	LL0000000469	ago4	argonaute RISC component 4	ENSDARG00000100854.3	100535764	ZDB-GENE-030131-5357	Entrez gene ID import through exact transcript match from gffcompare and abbreviation match	Ens99 gene ID import through exact transcript match from gffcompare and abbreviation match
chr21	7188943	7223171	+	LL0000000470	agpat2	1-acylglycerol-3-phosphate O-acyltransferase 2 (lysophosphatidic acid acyltransferase, beta)	ENSDARG00000101139.3	777624	ZDB-GENE-061103-541	Entrez gene ID import through exact transcript match from gffcompare and abbreviation match	Ens99 gene ID import through exact transcript match from gffcompare and abbreviation match
chr1	46834730	46875557	-	LL0000000471	agpat3	1-acylglycerol-3-phosphate O-acyltransferase 3	ENSDARG00000036549.8	406734	ZDB-GENE-040426-2765	Entrez gene ID import through exact transcript match from gffcompare and abbreviation match	Ens99 gene ID import through exact transcript match from gffcompare and abbreviation match
chr13	35765110	35788217	+	LL0000000472	agpat4	1-acylglycerol-3-phosphate O-acyltransferase 4 (lysophosphatidic acid acyltransferase, delta)	ENSDARG00000069044.3	406265	ZDB-GENE-040426-1924	Entrez gene ID import through exact transcript match from gffcompare and abbreviation match	Ens99 gene ID import through exact transcript match from gffcompare and abbreviation match
chr13	6257378	6280019	-	LL0000000473	agpat5	1-acylglycerol-3-phosphate O-acyltransferase 5 (lysophosphatidic acid acyltransferase, epsilon)	ENSDARG00000063187.6	767778	ZDB-GENE-060929-914	Entrez gene ID import through exact transcript match from gffcompare and abbreviation match	Ens99 gene ID import through exact transcript match from gffcompare and abbreviation match
chr5	8919698	8957120	+	LL0000000474	agpat9l	1-acylglycerol-3-phosphate O-acyltransferase 9, like	ENSDARG00000006491.9	567414	ZDB-GENE-060531-19	Entrez gene ID import through exact transcript match from gffcompare and abbreviation match	Ens99 gene ID import through exact transcript match from gffcompare and abbreviation match
chr9	1582407	1639991	-	LL0000000475	agps	alkylglycerone phosphate synthase	ENSDARG00000042821.8	386801	ZDB-GENE-031118-14	Entrez gene ID import through exact transcript match from gffcompare and abbreviation match	Ens99 gene ID import through exact transcript match from gffcompare and abbreviation match
chr9	45591229	45603009	-	LL0000000476	agr1	anterior gradient 1	ENSDARG00000060682.8	335309	ZDB-GENE-030131-7249	Entrez gene ID import through exact transcript match from gffcompare and abbreviation match	Ens99 gene ID import through exact transcript match from gffcompare and abbreviation match
chr19	30400372	30405975	-	LL0000000477	agr2	anterior gradient 2	ENSDARG00000070480.7	335616	ZDB-GENE-050417-214	Entrez gene ID import through exact transcript match from gffcompare and abbreviation match	Ens99 gene ID import through exact transcript match from gffcompare and abbreviation match
chr23	23485751	23914695	+	LL0000000478	agrn	agrin	ENSDARG00000079388.6	565373	ZDB-GENE-030131-1033	Entrez gene ID import through exact transcript match from gffcompare and abbreviation match	Ens99 gene ID import through exact transcript match from gffcompare and abbreviation match
chr7	35080490	35083585	-	LL0000000479	agrp	agouti related neuropeptide	ENSDARG00000069089.8	100149042	ZDB-GENE-040817-1	Entrez gene ID import through exact transcript match from gffcompare and abbreviation match	Ens99 gene ID import through exact transcript match from gffcompare and abbreviation match
chr13	23988442	23995876	+	LL0000000480	agt	angiotensinogen	ENSDARG00000016412.5	322485	ZDB-GENE-030131-1205	Entrez gene ID import through exact transcript match from gffcompare and abbreviation match	Ens99 gene ID import through exact transcript match from gffcompare and abbreviation match
chr8	49885638	49935358	-	LL0000000481	agtpbp1	ATP/GTP binding protein 1	ENSDARG00000105214.3	554164	ZDB-GENE-081104-267	Entrez gene ID import through exact transcript match from gffcompare and abbreviation match	Ens99 gene ID import through exact transcript match from gffcompare and abbreviation match
chr2	24927627	24933086	+	LL0000000482	agtr1a	angiotensin II receptor, type 1a	ENSDARG00000018616.9	794575	ZDB-GENE-070912-546	Entrez gene ID import through exact transcript match from gffcompare and abbreviation match	Ens99 gene ID import through exact transcript match from gffcompare and abbreviation match
chr24	4765981	4817784	-	LL0000000483	agtr1b	angiotensin II receptor, type 1b	ENSDARG00000045443.6	100333455	ZDB-GENE-110411-117	Entrez gene ID import through exact transcript match from gffcompare and abbreviation match	Ens99 gene ID import through exact transcript match from gffcompare and abbreviation match
chr5	23242370	23249494	+	LL0000000484	agtr2	angiotensin II receptor, type 2	ENSDARG00000035552.5	503772	ZDB-GENE-050306-56	Entrez gene ID import through exact transcript match from gffcompare and abbreviation match	Ens99 gene ID import through exact transcript match from gffcompare and abbreviation match
chr11	16040517	16064291	+	LL0000000485	agtrap	angiotensin II receptor-associated protein	ENSDARG00000077082.4	793937	ZDB-GENE-050309-11	Entrez gene ID import through exact transcript match from gffcompare and abbreviation match	Ens99 gene ID import through exact transcript match from gffcompare and abbreviation match
chr21	11138865	11177178	+	LL0000000486	agxt2	alanine--glyoxylate aminotransferase 2	ENSDARG00000100709.2	619269	ZDB-GENE-050913-100	Entrez gene ID import through exact transcript match from gffcompare and abbreviation match	Ens99 gene ID import through exact transcript match from gffcompare and abbreviation match
chr6	27112884	27123327	-	LL0000000487	agxta	alanine--glyoxylate and serine--pyruvate aminotransferase a	ENSDARG00000052099.5	436603	ZDB-GENE-040718-16	Entrez gene ID import through exact transcript match from gffcompare and abbreviation match	Ens99 gene ID import through exact transcript match from gffcompare and abbreviation match
chr2	22676743	22688651	-	LL0000000488	agxtb	alanine--glyoxylate and serine--pyruvate aminotransferase b	ENSDARG00000018478.9	79378	ZDB-GENE-010302-3	Entrez gene ID import through exact transcript match from gffcompare and abbreviation match	Ens99 gene ID import through exact transcript match from gffcompare and abbreviation match
chr17	12220781	12258500	-	LL0000000489	ahctf1	AT hook containing transcription factor 1	ENSDARG00000077530.6	553494	ZDB-GENE-070521-2	Entrez gene ID import through exact transcript match from gffcompare and abbreviation match	Ens99 gene ID import through exact transcript match from gffcompare and abbreviation match
chr6	49926115	49966288	+	LL0000000490	ahcy	adenosylhomocysteinase	ENSDARG00000005191.9	387530	ZDB-GENE-031219-6	Entrez gene ID import through exact transcript match from gffcompare and abbreviation match	Ens99 gene ID import through exact transcript match from gffcompare and abbreviation match
chr8	24971889	25011157	-	LL0000000491	ahcyl1	adenosylhomocysteinase-like 1	ENSDARG00000056331.7	798918	ZDB-GENE-021206-7	Entrez gene ID import through exact transcript match from gffcompare and abbreviation match	Ens99 gene ID import through exact transcript match from gffcompare and abbreviation match
chr4	5026012	5092191	-	LL0000000492	ahcyl2	adenosylhomocysteinase-like 2 [Source:ZFIN;Acc:ZDB-GENE-040115-5]	ENSDARG00000039343.9	394240	ZDB-GENE-040115-5	Entrez gene ID import through exact transcript match from gffcompare and abbreviation match	geneAbbrev conflict with Ens99 but matches ZFIN alias
chr19	43439321	43500658	+	LL0000000493	ahdc1	AT hook, DNA binding motif, containing 1	ENSDARG00000093453.4	100536210	ZDB-GENE-060503-584	Entrez gene ID import through exact transcript match from gffcompare and abbreviation match	Ens99 gene ID import through exact transcript match from gffcompare and abbreviation match
chr17	8193862	8268406	-	LL0000000494	ahi1	Abelson helper integration site 1	ENSDARG00000044056.9	562701	ZDB-GENE-060803-1	Entrez gene ID import through exact transcript match from gffcompare and abbreviation match	Ens99 gene ID import through exact transcript match from gffcompare and abbreviation match
chr14	26759290	26796334	+	LL0000000495	ahnak	AHNAK nucleoprotein	ENSDARG00000061764.9	559276	ZDB-GENE-030131-8719	Entrez gene ID import through exact transcript match from gffcompare and abbreviation match	Ens99 gene ID import through exact transcript match from gffcompare and abbreviation match
chr16	20009427	20038280	-	LL0000000496	ahr1a	aryl hydrocarbon receptor 1a	ENSDARG00000020046.7	246224	ZDB-GENE-020531-2	Entrez gene ID import through exact transcript match from gffcompare and abbreviation match	Ens99 gene ID import through exact transcript match from gffcompare and abbreviation match
chr22	12976947	13043011	-	LL0000000497	ahr1b	aryl hydrocarbon receptor 1b	ENSDARG00000023537.9	554265	ZDB-GENE-050922-1	Entrez gene ID import through exact transcript match from gffcompare and abbreviation match	Ens99 gene ID import through exact transcript match from gffcompare and abbreviation match
chr22	13046270	13165186	-	LL0000000498	ahr2	aryl hydrocarbon receptor 2	ENSDARG00000021833.7	30517	ZDB-GENE-990714-16	Entrez gene ID import through exact transcript match from gffcompare and abbreviation match	Ens99 gene ID import through exact transcript match from gffcompare and abbreviation match
chr24	42094288	42102252	+	LL0000000499	ahrra	aryl-hydrocarbon receptor repressor a	ENSDARG00000099702.2	641291	ZDB-GENE-051018-1	Entrez gene ID import through exact transcript match from gffcompare and abbreviation match	Ens99 gene ID import through exact transcript match from gffcompare and abbreviation match
chr2	50133506	50198562	-	LL0000000500	ahrrb	aryl-hydrocarbon receptor repressor b	ENSDARG00000052618.6	565319	ZDB-GENE-051018-2	Entrez gene ID import through exact transcript match from gffcompare and abbreviation match	Ens99 gene ID import through exact transcript match from gffcompare and abbreviation match
chr20	26966725	26974248	+	LL0000000501	ahsa1a	AHA1, activator of heat shock protein ATPase homolog 1a	ENSDARG00000028664.11	565968	ZDB-GENE-030131-1869	Entrez gene ID import through exact transcript match from gffcompare and abbreviation match	Ens99 gene ID import through exact transcript match from gffcompare and abbreviation match
chr17	43850516	43863700	-	LL0000000502	ahsa1b	AHA1, activator of heat shock protein ATPase homolog 1b	ENSDARG00000100317.2	321945	ZDB-GENE-030131-664	Entrez gene ID import through exact transcript match from gffcompare and abbreviation match	Ens99 gene ID import through exact transcript match from gffcompare and abbreviation match
chr22	37874691	37881714	+	LL0000000503	ahsg1	alpha-2-HS-glycoprotein 1	ENSDARG00000026764.8	569558	ZDB-GENE-041114-50	Entrez gene ID import through exact transcript match from gffcompare and abbreviation match	Ens99 gene ID import through exact transcript match from gffcompare and abbreviation match
chr2	10134345	10141741	+	LL0000000504	ahsg2	alpha-2-HS-glycoprotein 2	ENSDARG00000069293.5	567406	ZDB-GENE-030131-1133	Entrez gene ID import through exact transcript match from gffcompare and abbreviation match	Ens99 gene ID import through exact transcript match from gffcompare and abbreviation match
chr16	12660477	12665652	+	LL0000000505	aicda	activation-induced cytidine deaminase	ENSDARG00000015734.9	493784	ZDB-GENE-041122-2	Entrez gene ID import through exact transcript match from gffcompare and abbreviation match	Ens99 gene ID import through exact transcript match from gffcompare and abbreviation match
chr20	51730627	51754836	+	LL0000000506	aida	axin interactor, dorsalization associated	ENSDARG00000014532.10	393763	ZDB-GENE-071126-2	Entrez gene ID import through exact transcript match from gffcompare and abbreviation match	Ens99 gene ID import through exact transcript match from gffcompare and abbreviation match
chr5	34549365	34575502	+	LL0000000507	aif1l	allograft inflammatory factor 1-like	ENSDARG00000009336.8	321033	ZDB-GENE-030131-9646	Entrez gene ID import through exact transcript match from gffcompare and abbreviation match	Ens99 gene ID import through exact transcript match from gffcompare and abbreviation match
chr5	22550614	22573724	-	LL0000000508	aifm1	apoptosis inducing factor mitochondrion associated 1	ENSDARG00000058088.8	373125	ZDB-GENE-030826-11	Entrez gene ID import through exact transcript match from gffcompare and abbreviation match	Ens99 gene ID import through exact transcript match from gffcompare and abbreviation match
chr13	7241166	7261679	+	LL0000000509	aifm2	apoptosis inducing factor mitochondria associated 2	ENSDARG00000077549.5	557507	ZDB-GENE-050506-76	Entrez gene ID import through exact transcript match from gffcompare and abbreviation match	Ens99 gene ID import through exact transcript match from gffcompare and abbreviation match
chr5	12637255	12701603	-	LL0000000510	aifm3	apoptosis inducing factor mitochondria associated 3	ENSDARG00000062780.5	100150876	ZDB-GENE-140619-2	Entrez gene ID import through exact transcript match from gffcompare and abbreviation match	Ens99 gene ID import through exact transcript match from gffcompare and abbreviation match
chr15	25438714	25448626	+	LL0000000511	aifm4	apoptosis inducing factor mitochondria associated 4	ENSDARG00000061634.9	791218	ZDB-GENE-070112-2282	Entrez gene ID import through exact transcript match from gffcompare and abbreviation match	Ens99 gene ID import through exact transcript match from gffcompare and abbreviation match
chr21	39299667	39327819	-	LL0000000512	aifm5	apoptosis inducing factor mitochondria associated 5	ENSDARG00000075551.5	557064	ZDB-GENE-091118-96	Entrez gene ID import through exact transcript match from gffcompare and abbreviation match	Ens99 gene ID import through exact transcript match from gffcompare and abbreviation match
chr20	37661229	37736703	+	LL0000000513	aig1	androgen-induced 1 (H. sapiens)	ENSDARG00000007171.9	562261	ZDB-GENE-041014-358	Entrez gene ID import through exact transcript match from gffcompare and abbreviation match	Ens99 gene ID import through exact transcript match from gffcompare and abbreviation match
chr1	50293938	50319654	+	LL0000000514	aimp1	aminoacyl tRNA synthetase complex-interacting multifunctional protein 1 [Source:ZFIN;Acc:ZDB-GENE-060825-144]	ENSDARG00000060036.5	562232	ZDB-GENE-060825-144	Entrez gene ID import through exact transcript match from gffcompare and abbreviation match	geneAbbrev conflict with Ens99 but matches ZFIN alias
chr3	61108356	61116295	-	LL0000000515	aimp2	aminoacyl tRNA synthetase complex interacting multifunctional protein 2	ENSDARG00000018903.8	406647	ZDB-GENE-040426-2652	Entrez gene ID import through exact transcript match from gffcompare and abbreviation match	Ens99 gene ID import through exact transcript match from gffcompare and abbreviation match
chr1	39995008	40009814	+	LL0000000516	aip	aryl hydrocarbon receptor interacting protein	ENSDARG00000104437.2	334795	ZDB-GENE-030131-6735	Entrez gene ID import through exact transcript match from gffcompare and abbreviation match	Ens99 gene ID import through exact transcript match from gffcompare and abbreviation match
chr15	24872581	24884784	-	LL0000000517	aipl1	aryl hydrocarbon receptor interacting protein-like 1	ENSDARG00000075067.4	100537095	ZDB-GENE-131121-577	Entrez gene ID import through exact transcript match from gffcompare and abbreviation match	Ens99 gene ID import through exact transcript match from gffcompare and abbreviation match
chr14	40874212	40907225	+	LL0000000518	aipl2	aryl hydrocarbon receptor interacting protein like 2	ENSDARG00000098164.3	100534741	ZDB-GENE-141216-23	geneAbbrevConflict; gffcompare transcript match; overlap gene coordinates >50%	Ens99 gene ID import through exact transcript match from gffcompare and abbreviation match
chr2	22808544	22846553	+	LL0000000519	aire	autoimmune regulator	ENSDARG00000056784.6	100007662	ZDB-GENE-071008-4	Entrez gene ID import through exact transcript match from gffcompare and abbreviation match	Ens99 gene ID import through exact transcript match from gffcompare and abbreviation match
chr8	21588067	21679618	+	LL0000000520	ajap1	adherens junctions associated protein 1	ENSDARG00000038655.6	101887016	ZDB-GENE-041210-353	Entrez gene ID import through exact transcript match from gffcompare and abbreviation match	Ens99 gene ID import through exact transcript match from gffcompare and abbreviation match
chr7	24100155	24112484	-	LL0000000521	ajuba	ajuba LIM protein	ENSDARG00000077842.5	572549	ZDB-GENE-030131-9341	Entrez gene ID import through exact transcript match from gffcompare and abbreviation match	Ens99 gene ID import through exact transcript match from gffcompare and abbreviation match
chr5	71699874	71724814	-	LL0000000522	ak1	adenylate kinase 1	ENSDARG00000001950.8	445486	ZDB-GENE-040822-37	Entrez gene ID import through exact transcript match from gffcompare and abbreviation match	Ens99 gene ID import through exact transcript match from gffcompare and abbreviation match
chr19	35418683	35428914	-	LL0000000523	ak2	adenylate kinase 2	ENSDARG00000005926.6	321793	ZDB-GENE-030131-512	Entrez gene ID import through exact transcript match from gffcompare and abbreviation match	Ens99 gene ID import through exact transcript match from gffcompare and abbreviation match
chr10	11000894	11012000	-	LL0000000524	ak3	adenylate kinase 3	ENSDARG00000058226.6	406404	ZDB-GENE-040426-2142	Entrez gene ID import through exact transcript match from gffcompare and abbreviation match	Ens99 gene ID import through exact transcript match from gffcompare and abbreviation match
chr6	31350101	31366968	-	LL0000000525	ak4	adenylate kinase 4	ENSDARG00000006546.9	406590	ZDB-GENE-040426-2505	Entrez gene ID import through exact transcript match from gffcompare and abbreviation match	Ens99 gene ID import through exact transcript match from gffcompare and abbreviation match
chr2	8845840	9059955	-	LL0000000526	ak5	adenylate kinase 5	ENSDARG00000012555.8	100003595	ZDB-GENE-030131-8256	Entrez gene ID import through exact transcript match from gffcompare and abbreviation match	Ens99 gene ID import through exact transcript match from gffcompare and abbreviation match
chr5	64172487	64203101	-	LL0000000527	ak5l	adenylate kinase 5, like	ENSDARG00000017739.7	548336	ZDB-GENE-050410-2	Entrez gene ID import through exact transcript match from gffcompare and abbreviation match	Ens99 gene ID import through exact transcript match from gffcompare and abbreviation match
chr5	26199537	26203245	+	LL0000000528	AK6	zgc:86811 [Source:ZFIN;Acc:ZDB-GENE-040625-113]	ENSDARG00000035573.5	415208	ZDB-GENE-040625-113	geneAbbrevConflict; gffcompare transcript match; overlap gene coordinates >90%	Ens99 gene ID import through exact transcript match from gffcompare and abbreviation match
chr20	4741579	4766683	-	LL0000000529	ak7a	adenylate kinase 7a	ENSDARG00000019001.12	402854	ZDB-GENE-040724-122	Entrez gene ID import through exact transcript match from gffcompare and abbreviation match	Ens99 gene ID import through exact transcript match from gffcompare and abbreviation match
chr17	18877756	18888959	-	LL0000000530	ak7b	adenylate kinase 7b	ENSDARG00000017023.10	504040	ZDB-GENE-050309-170	Entrez gene ID import through exact transcript match from gffcompare and abbreviation match	Ens99 gene ID import through exact transcript match from gffcompare and abbreviation match
chr5	29671677	29711948	+	LL0000000531	ak8	adenylate kinase 8	ENSDARG00000030961.6	553671	ZDB-GENE-050522-275	Entrez gene ID import through exact transcript match from gffcompare and abbreviation match	Ens99 gene ID import through exact transcript match from gffcompare and abbreviation match
chr20	33707018	33737831	+	LL0000000532	ak9	adenylate kinase 9	ENSDARG00000021913.9	557708	ZDB-GENE-041014-337	geneAbbrevConflict; gffcompare transcript match; overlap gene coordinates >90%	Ens99 gene ID import through exact transcript match from gffcompare and abbreviation match
chr5	62009729	62045725	+	LL0000000533	akap10	A kinase (PRKA) anchor protein 10	ENSDARG00000059549.7	566920	ZDB-GENE-030131-2535	Entrez gene ID import through exact transcript match from gffcompare and abbreviation match	Ens99 gene ID import through exact transcript match from gffcompare and abbreviation match
chr9	17965307	18006632	+	LL0000000534	akap11	A kinase (PRKA) anchor protein 11	ENSDARG00000075435.6	558595	ZDB-GENE-090804-1	Entrez gene ID import through exact transcript match from gffcompare and abbreviation match	Ens99 gene ID import through exact transcript match from gffcompare and abbreviation match
chr17	7763607	7786151	+	LL0000000535	akap12a	A kinase (PRKA) anchor protein 12a	ENSDARG00000091792.4	101885554	ZDB-GENE-110310-3	Entrez gene ID import through exact transcript match from gffcompare and abbreviation match	Ens99 gene ID import through exact transcript match from gffcompare and abbreviation match
chr20	26407758	26467454	-	LL0000000536	akap12b	A kinase (PRKA) anchor protein 12b	ENSDARG00000055678.8	567365	ZDB-GENE-030131-9753	Entrez gene ID import through exact transcript match from gffcompare and abbreviation match	Ens99 gene ID import through exact transcript match from gffcompare and abbreviation match
chr7	15091162	15185873	-	LL0000000537	akap13	A-kinase anchoring protein 13	ENSDARG00000079994.5	327519	ZDB-GENE-030131-6253		Ens99 gene ID import based on gene abbreviation ONLY; may conflict with gene coordinates
chr9	55748237	55773151	-	LL0000000538	akap17a	A kinase (PRKA) anchor protein 17A	ENSDARG00000104768.3	393655	ZDB-GENE-040426-1460	Entrez gene ID import through exact transcript match from gffcompare and abbreviation match	Ens99 gene ID import through exact transcript match from gffcompare and abbreviation match
chr10	37400838	37415223	+	LL0000000539	akap1a	A kinase (PRKA) anchor protein 1a	ENSDARG00000089802.4	100002545	ZDB-GENE-030131-5980	Entrez gene ID import through exact transcript match from gffcompare and abbreviation match	Ens99 gene ID import through exact transcript match from gffcompare and abbreviation match
chr15	30836981	30857436	-	LL0000000540	akap1b	A kinase (PRKA) anchor protein 1b	ENSDARG00000006062.8	556208	ZDB-GENE-030131-6844	Entrez gene ID import through exact transcript match from gffcompare and abbreviation match	Ens99 gene ID import through exact transcript match from gffcompare and abbreviation match
chr17	8988347	9267175	+	LL0000000541	akap6	A kinase (PRKA) anchor protein 6	ENSDARG00000077295.6	100002625	ZDB-GENE-120207-2	Entrez gene ID import through exact transcript match from gffcompare and abbreviation match	Ens99 gene ID import through exact transcript match from gffcompare and abbreviation match
chr20	2433293	2481813	+	LL0000000542	akap7	A kinase (PRKA) anchor protein 7	ENSDARG00000043843.7	101885028	ZDB-GENE-040724-128	Entrez gene ID import through exact transcript match from gffcompare and abbreviation match	Ens99 gene ID import through exact transcript match from gffcompare and abbreviation match
chr1	59218067	59237167	-	LL0000000543	akap8l	A kinase (PRKA) anchor protein 8-like	ENSDARG00000099635.2	406500	ZDB-GENE-040426-2303	Entrez gene ID import through exact transcript match from gffcompare and abbreviation match	Ens99 gene ID import through exact transcript match from gffcompare and abbreviation match
chr19	531507	586328	+	LL0000000544	akap9	A kinase (PRKA) anchor protein 9	ENSDARG00000079610.5	565037	ZDB-GENE-030131-7276	partial transcript match; "j" class in gffcompare; abbreviation match	Ens99 gene ID import through exact transcript match from gffcompare and abbreviation match
chr18	16950724	16953978	-	LL0000000545	akip1	A kinase (PRKA) interacting protein 1	ENSDARG00000069037.7	562301	ZDB-GENE-030829-24	Entrez gene ID import through exact transcript match from gffcompare and abbreviation match	Ens99 gene ID import through exact transcript match from gffcompare and abbreviation match
chr16	33121106	33141934	+	LL0000000546	akirin1	akirin 1	ENSDARG00000039969.7	406432	ZDB-GENE-040426-2178	Entrez gene ID import through exact transcript match from gffcompare and abbreviation match	Ens99 gene ID import through exact transcript match from gffcompare and abbreviation match
chr20	2715949	2725930	-	LL0000000547	akirin2	akirin 2	ENSDARG00000058729.8	406855	ZDB-GENE-040426-2944	Entrez gene ID import through exact transcript match from gffcompare and abbreviation match	Ens99 gene ID import through exact transcript match from gffcompare and abbreviation match
chr21	13922275	13972748	-	LL0000000548	akna	AT-hook transcription factor	ENSDARG00000087110.5	556113	ZDB-GENE-091204-170	Entrez gene ID import through exact transcript match from gffcompare and abbreviation match	Ens99 gene ID import through exact transcript match from gffcompare and abbreviation match
chr2	45511057	45537935	+	LL0000000549	aknad1	AKNA domain containing 1	ENSDARG00000094414.4	100003458	ZDB-GENE-070912-649	Entrez gene ID import through exact transcript match from gffcompare and abbreviation match	Ens99 gene ID import through exact transcript match from gffcompare and abbreviation match
chr5	41521043	41531635	-	LL0000000550	akr1a1a	aldo-keto reductase family 1, member A1a (aldehyde reductase)	ENSDARG00000035257.6	445326	ZDB-GENE-040808-44	Entrez gene ID import through exact transcript match from gffcompare and abbreviation match	Ens99 gene ID import through exact transcript match from gffcompare and abbreviation match
chr6	33918813	33925434	-	LL0000000551	akr1a1b	aldo-keto reductase family 1, member A1b (aldehyde reductase)	ENSDARG00000052030.7	799805	ZDB-GENE-050417-118	Entrez gene ID import through exact transcript match from gffcompare and abbreviation match	Ens99 gene ID import through exact transcript match from gffcompare and abbreviation match
chr4	14899720	14910386	+	LL0000000552	akr1b1	aldo-keto reductase family 1, member B1 (aldose reductase) [Source:ZFIN;Acc:ZDB-GENE-040625-7]	ENSDARG00000006215.10	415138	ZDB-GENE-040625-7	Entrez gene ID import through exact transcript match from gffcompare and abbreviation match	geneAbbrev conflict with Ens99 but matches ZFIN alias
chr11	41838036	41850086	+	LL0000000553	akr7a3	aldo-keto reductase family 7, member A3 (aflatoxin aldehyde reductase)	ENSDARG00000016649.7	436642	ZDB-GENE-040718-62	Entrez gene ID import through exact transcript match from gffcompare and abbreviation match	Ens99 gene ID import on matching gene abbreviation and > 0.8 gene coordinate overlap using intersectBed
chr17	1514711	1533170	+	LL0000000554	akt1	v-akt murine thymoma viral oncogene homolog 1	ENSDARG00000099657.2	101910198	ZDB-GENE-130730-1	partial transcript match; "j" class in gffcompare; abbreviation match	Ens99 gene ID import through exact transcript match from gffcompare and abbreviation match
chr3	30190419	30201848	+	LL0000000555	akt1s1	AKT1 substrate 1 (proline-rich)	ENSDARG00000074667.5	566559	ZDB-GENE-030131-482	Entrez gene ID import through exact transcript match from gffcompare and abbreviation match	Ens99 gene ID import through exact transcript match from gffcompare and abbreviation match
chr18	40710307	40753623	-	LL0000000556	akt2	v-akt murine thymoma viral oncogene homolog 2	ENSDARG00000011219.10	378972	ZDB-GENE-031007-5	Entrez gene ID import through exact transcript match from gffcompare and abbreviation match	Ens99 gene ID import through exact transcript match from gffcompare and abbreviation match
chr10	311676	322852	-	LL0000000557	akt2l	v-akt murine thymoma viral oncogene homolog 2, like	ENSDARG00000103612.2	403146	ZDB-GENE-040121-5	Entrez gene ID import through exact transcript match from gffcompare and abbreviation match	Ens99 gene ID import through exact transcript match from gffcompare and abbreviation match
chr13	11174050	11378471	-	LL0000000558	akt3a	v-akt murine thymoma viral oncogene homolog 3a	ENSDARG00000104810.2	560549	ZDB-GENE-050419-180	Entrez gene ID import through exact transcript match from gffcompare and abbreviation match	Ens99 gene ID import through exact transcript match from gffcompare and abbreviation match
chr1	53731974	53756905	-	LL0000000559	akt3b	v-akt murine thymoma viral oncogene homolog 3b	ENSDARG00000087205.3	100149794	ZDB-GENE-110309-3	Entrez gene ID import through exact transcript match from gffcompare and abbreviation match	Ens99 gene ID import through exact transcript match from gffcompare and abbreviation match
chr7	36467314	36484078	+	LL0000000560	aktip	akt interacting protein	ENSDARG00000026862.9	378716	ZDB-GENE-030909-5	Entrez gene ID import through exact transcript match from gffcompare and abbreviation match	Ens99 gene ID import through exact transcript match from gffcompare and abbreviation match
chr9	33997310	34006509	+	LL0000000561	AL590134.1		ENSDARG00000095161.2			No transcript match by gffcompare	Ens99 gene ID import through exact transcript match from gffcompare and abbreviation match
chr3	34767541	34775954	-	LL0000000562	AL590145.1		ENSDARG00000095967.2				Ens99 gene ID import through exact transcript match from gffcompare and abbreviation match
chr9	34070103	34083167	-	LL0000000563	AL590146.1		ENSDARG00000095368.2			No transcript match by gffcompare	Ens99 gene ID import through exact transcript match from gffcompare and abbreviation match
chr17	33203780	33231714	+	LL0000000564	AL590149.1		ENSDARG00000012581.8	100537549		exact transcript match; abbrev conflict, less than 50% gene coordinate overlap	Ens99 gene ID import through exact transcript match from gffcompare and abbreviation match
chr4	15135239	15140224	-	LL0000000565	AL590150.1		ENSDARG00000092341.4			No transcript match by gffcompare	geneAbbrevConflict; gffcompare transcript match; overlap gene coordinates >90%
chr14	32773672	32789671	-	LL0000000566	AL590151.1	pyrimidinergic receptor P2Y4 [Source:NCBI gene;Acc:368435]	ENSDARG00000053570.6	368435		geneAbbrevConflict; gffcompare transcript match; overlap gene coordinates >90%	Ens99 gene ID import through exact transcript match from gffcompare and abbreviation match
chr14	32887808	32907751	+	LL0000000567	AL590151.2	uncharacterized LOC103908760 [Source:NCBI gene;Acc:103908760]	ENSDARG00000105320.2	103908760		geneAbbrevConflict; gffcompare transcript match; overlap gene coordinates >90%	Ens99 gene ID import through exact transcript match from gffcompare and abbreviation match
chr4	31427055	31427837	+	LL0000000568	AL590152.1		ENSDARG00000110696.1				Ens99 gene ID import through exact transcript match from gffcompare and abbreviation match
chr18	37409823	37415449	-	LL0000000569	AL627088.1		ENSDARG00000095600.2	103909173		partial transcript overlap; "j" class in gffcompare; no abbreviation match	Ens99 gene ID import through exact transcript match from gffcompare and abbreviation match
chr23	7950085	7971776	-	LL0000000570	AL627126.1		ENSDARG00000117804.1			No transcript match by gffcompare	Ens99 gene ID import through exact transcript match from gffcompare and abbreviation match
chr22	6384693	6417470	+	LL0000000571	AL627164.1		ENSDARG00000114588.1				Ens99 gene ID import through exact transcript match from gffcompare and abbreviation match
chr6	32195891	32196700	-	LL0000000572	AL627258.1		ENSDARG00000096309.2			No transcript match by gffcompare	Ens99 gene ID import through exact transcript match from gffcompare and abbreviation match
chr21	2102829	2113376	+	LL0000000573	AL627305.1	gastrula zinc finger protein XlCGF57.1-like [Source:NCBI gene;Acc:572670]	ENSDARG00000100324.2	572670		geneAbbrevConflict; gffcompare transcript match; overlap gene coordinates >90%	Ens99 gene ID import through exact transcript match from gffcompare and abbreviation match
chr21	2133097	2133384	-	LL0000000574	AL627305.2		ENSDARG00000101832.2				Ens99 gene ID import through exact transcript match from gffcompare and abbreviation match
chr21	2137653	2144564	-	LL0000000575	AL627305.3		ENSDARG00000102019.2	101884191		geneAbbrevConflict; gffcompare transcript match; overlap gene coordinates >50%	Ens99 gene ID import through exact transcript match from gffcompare and abbreviation match
chr4	34657245	34664958	+	LL0000000576	AL645691.1	gastrula zinc finger protein XlCGF8.2DB-like [Source:NCBI gene;Acc:100536867]	ENSDARG00000102561.2	100536867		Partial transcript match; "c" classification in gffcompare	Ens99 gene ID import through exact transcript match from gffcompare and abbreviation match
chr4	34553067	34589237	-	LL0000000577	AL645691.2		ENSDARG00000102716.2	100004373		geneAbbrevConflict; gffcompare transcript match; overlap gene coordinates >90%	Ens99 gene ID import through exact transcript match from gffcompare and abbreviation match
chr14	25043810	25046357	+	LL0000000578	AL645792.1		ENSDARG00000103274.2			No transcript match by gffcompare	Ens99 gene ID import through exact transcript match from gffcompare and abbreviation match
chr14	25052810	25055796	+	LL0000000579	AL645792.2	si:rp71-1d10.6 [Source:NCBI gene;Acc:101883946]	ENSDARG00000103788.2	101883946		geneAbbrevConflict; gffcompare transcript match; overlap gene coordinates >90%	Ens99 gene ID import through exact transcript match from gffcompare and abbreviation match
chr12	28934819	28946523	+	LL0000000580	AL732488.1	uncharacterized LOC110438942 [Source:NCBI gene;Acc:110438942]	ENSDARG00000085246.2	110438942		geneAbbrevConflict; gffcompare transcript match; overlap gene coordinates >90%	Ens99 gene ID import based on gene abbreviation ONLY; may conflict with gene coordinates
chr23	16744782	16746423	-	LL0000000581	AL732515.1		ENSDARG00000095199.2			No transcript match by gffcompare	Ens99 gene ID import through exact transcript match from gffcompare and abbreviation match
chr6	41086608	41091181	-	LL0000000582	AL732567.1		ENSDARG00000102957.2				Ens99 gene ID import through exact transcript match from gffcompare and abbreviation match
chr12	9669927	9671137	-	LL0000000583	AL732629.1		ENSDARG00000104366.2				geneAbbrevConflict; gffcompare transcript match; overlap gene coordinates >90%
chr7	41112901	41113295	+	LL0000000584	AL772146.1		ENSDARG00000105715.2			No transcript match by gffcompare	Ens99 gene ID import through exact transcript match from gffcompare and abbreviation match
chr7	41254621	41255247	+	LL0000000585	AL772146.2		ENSDARG00000105823.2				Ens99 gene ID import through exact transcript match from gffcompare and abbreviation match
chr17	19349313	19397420	-	LL0000000586	AL772219.1		ENSDARG00000117701.1			No transcript match by gffcompare	Ens99 gene ID import through exact transcript match from gffcompare and abbreviation match
chr25	13271458	13280481	+	LL0000040418	AL772241.2		ENSDARG00000110792.1				Added to V4.2 from Ens99
chr4	55991165	55992044	+	LL0000000587	AL772298.1		ENSDARG00000089005.5				Ens99 gene ID import through exact transcript match from gffcompare and abbreviation match
chr4	56001936	56002860	-	LL0000000588	AL772298.3		ENSDARG00000117343.1				Ens99 gene ID import through exact transcript match from gffcompare and abbreviation match
chr3	58469935	58470519	+	LL0000000589	AL772300.1		ENSDARG00000097343.2				Ens99 gene ID import through exact transcript match from gffcompare and abbreviation match
chr3	58344862	58353587	+	LL0000000590	AL772300.2		ENSDARG00000117344.1				Ens99 gene ID import through exact transcript match from gffcompare and abbreviation match
chr19	5089416	5092618	-	LL0000000591	AL772314.1		ENSDARG00000097492.2				Ens99 gene ID import through exact transcript match from gffcompare and abbreviation match
chr3	18771528	18788485	+	LL0000000592	AL772362.1		ENSDARG00000097552.2				geneAbbrevConflict; gffcompare transcript match; overlap gene coordinates >90%
chr14	19553010	19554957	-	LL0000000593	AL772373.1		ENSDARG00000117427.1			No transcript match by gffcompare	Ens99 gene ID import through exact transcript match from gffcompare and abbreviation match
chr6	6376395	6386324	-	LL0000000594	AL772382.1		ENSDARG00000097122.3			No transcript match by gffcompare	Ens99 gene ID import through exact transcript match from gffcompare and abbreviation match
chr16	35821321	35824708	-	LL0000000595	AL773558.1		ENSDARG00000098223.2			No transcript match by gffcompare	Ens99 gene ID import through exact transcript match from gffcompare and abbreviation match
chr18	23510185	23608028	-	LL0000000596	AL805905.1		ENSDARG00000112515.1			No transcript match by gffcompare	Ens99 gene ID import based on gene abbreviation ONLY; may conflict with gene coordinates
chr10	22828366	22831429	-	LL0000000597	AL807389.1		ENSDARG00000094169.2				geneAbbrevConflict; gffcompare transcript match; overlap gene coordinates >90%
chr4	33811110	33812019	+	LL0000000598	AL807749.1		ENSDARG00000095989.2				Ens99 gene ID import through exact transcript match from gffcompare and abbreviation match
chr4	33796692	33808943	-	LL0000000599	AL807749.2		ENSDARG00000117785.1				Ens99 gene ID import through exact transcript match from gffcompare and abbreviation match
chr8	29581495	29635923	-	LL0000000600	AL807792.1		ENSDARG00000096836.2				Ens99 gene ID import through exact transcript match from gffcompare and abbreviation match
chr7	66536017	66537436	+	LL0000000601	AL808121.1		ENSDARG00000097213.2			No transcript match by gffcompare	Ens99 gene ID import through exact transcript match from gffcompare and abbreviation match
chr8	43934595	43940177	-	LL0000000602	AL808129.1		ENSDARG00000097262.2				Ens99 gene ID import through exact transcript match from gffcompare and abbreviation match
chr8	43852743	43853846	+	LL0000000603	AL808129.2		ENSDARG00000112428.1				Ens99 gene ID import through exact transcript match from gffcompare and abbreviation match
chr22	30740625	30745186	+	LL0000000604	AL831726.1	AMBIGUOUS	ENSDARG00000086880.3	101883469		geneAbbrevConflict; gffcompare transcript match; overlap gene coordinates >90%	Ens99 gene ID import through exact transcript match from gffcompare and abbreviation match
chr22	30757516	30771029	-	LL0000000605	AL831726.2	uncharacterized LOC101882696 [Source:NCBI gene;Acc:101882696]	ENSDARG00000104185.2	101882696		geneAbbrevConflict; gffcompare transcript match; overlap gene coordinates >90%	Ens99 gene ID import through exact transcript match from gffcompare and abbreviation match
chr22	30723361	30726094	+	LL0000000606	AL831726.3		ENSDARG00000117226.1			No transcript match by gffcompare	geneAbbrevConflict; gffcompare transcript match; overlap gene coordinates >90%
chr13	24585224	24588220	-	LL0000000607	AL831745.1	si:ch211-217g15.3 [Source:NCBI gene;Acc:368914]	ENSDARG00000039423.6	368914		geneAbbrevConflict; gffcompare transcript match; overlap gene coordinates >50%	Ens99 gene ID import through exact transcript match from gffcompare and abbreviation match
chr13	24601938	24606667	-	LL0000000608	AL831745.2	uncharacterized LOC110440182 [Source:NCBI gene;Acc:110440182]	ENSDARG00000094022.3	110440182		geneAbbrevConflict; gffcompare transcript match; overlap gene coordinates >90%	Ens99 gene ID import through exact transcript match from gffcompare and abbreviation match
chr13	24597711	24650317	+	LL0000000609	AL831745.3		ENSDARG00000101436.2				Ens99 gene ID import through exact transcript match from gffcompare and abbreviation match
chr5	29533606	29535676	-	LL0000000610	AL831768.1	P2Y purinoceptor 4-like [Source:NCBI gene;Acc:100534861]	ENSDARG00000100923.2	100534861		geneAbbrevConflict; gffcompare transcript match; overlap gene coordinates >90%	Ens99 gene ID import through exact transcript match from gffcompare and abbreviation match
chr12	27494784	27569200	-	LL0000000611	AL833789.1		ENSDARG00000096811.2				Ens99 gene ID import through exact transcript match from gffcompare and abbreviation match
chr11	6322998	6324302	+	LL0000000612	AL840638.1		ENSDARG00000098608.2			No transcript match by gffcompare	Ens99 gene ID import through exact transcript match from gffcompare and abbreviation match
chr11	6374448	6378070	+	LL0000000613	AL840638.2		ENSDARG00000114350.1				geneAbbrevConflict; gffcompare transcript match; overlap gene coordinates >90%
chr21	20322879	20342912	+	LL0000000614	AL844141.1		ENSDARG00000096964.3				Ens99 gene ID import through exact transcript match from gffcompare and abbreviation match
chr11	31869020	31872628	-	LL0000000615	AL844172.1	uncharacterized LOC559910 [Source:NCBI gene;Acc:559910]	ENSDARG00000113841.1	559910		Partial transcript match;"k" classification in gffcompare	geneAbbrevConflict; gffcompare transcript match; overlap gene coordinates >90%
chr8	18515040	18519121	-	LL0000000616	AL844185.1		ENSDARG00000095868.3				Ens99 gene ID import through exact transcript match from gffcompare and abbreviation match
chr17	28073062	28078964	+	LL0000000617	AL844186.1		ENSDARG00000114351.1			No transcript match by gffcompare	Ens99 gene ID import through exact transcript match from gffcompare and abbreviation match
chr18	32895349	32912644	+	LL0000000618	AL844192.1		ENSDARG00000100356.2	103909157		geneAbbrevConflict; gffcompare transcript match; overlap gene coordinates >90%	Ens99 gene ID import through exact transcript match from gffcompare and abbreviation match
chr21	17011581	17016788	-	LL0000000619	AL844518.1	family with sequence similarity 216 member A [Source:NCBI gene;Acc:100150820]	ENSDARG00000111211.1	100150820		geneAbbrevConflict; gffcompare transcript match; overlap gene coordinates >50%	Ens99 gene ID import through exact transcript match from gffcompare and abbreviation match
chr11	16669218	16675164	-	LL0000000620	AL844563.1		ENSDARG00000099436.2			No transcript match by gffcompare	Ens99 gene ID import through exact transcript match from gffcompare and abbreviation match
chr4	40839314	40839875	+	LL0000000621	AL845295.1		ENSDARG00000096435.2				Ens99 gene ID import through exact transcript match from gffcompare and abbreviation match
chr4	40734899	40787847	+	LL0000000622	AL845295.2		ENSDARG00000096472.2				Ens99 gene ID import through exact transcript match from gffcompare and abbreviation match
chr20	39410844	39414258	-	LL0000000623	AL845306.1		ENSDARG00000095211.4			No transcript match by gffcompare	geneAbbrevConflict; gffcompare transcript match; overlap gene coordinates >90%
chr15	19094511	19095107	-	LL0000000624	AL845312.1		ENSDARG00000093679.2				Ens99 gene ID import through exact transcript match from gffcompare and abbreviation match
chr10	31263274	31294777	-	LL0000000625	AL845320.1		ENSDARG00000092847.2				Ens99 gene ID import through exact transcript match from gffcompare and abbreviation match
chr10	31344227	31347340	+	LL0000000626	AL845320.2		ENSDARG00000114981.1	101884880		geneAbbrevConflict; gffcompare transcript match; overlap gene coordinates >50%	Ens99 gene ID import through exact transcript match from gffcompare and abbreviation match
chr11	38614476	38876352	+	LL0000000627	AL845324.1		ENSDARG00000023609.11				Ens99 gene ID import through exact transcript match from gffcompare and abbreviation match
chr11	38947987	38949751	-	LL0000000628	AL845324.2		ENSDARG00000095680.2			No transcript match by gffcompare	Ens99 gene ID import through exact transcript match from gffcompare and abbreviation match
chr22	30035719	30043894	+	LL0000000629	AL845330.1	stonustoxin subunit beta-like [Source:NCBI gene;Acc:796214]	ENSDARG00000108467.2	796214		geneAbbrevConflict; gffcompare transcript match; overlap gene coordinates >50%	Ens99 gene ID import through exact transcript match from gffcompare and abbreviation match
chr23	30764287	30772886	+	LL0000000630	AL845357.1		ENSDARG00000097796.2				Ens99 gene ID import through exact transcript match from gffcompare and abbreviation match
chr2	29712697	29727072	+	LL0000000631	AL845362.1		ENSDARG00000093205.3	110438043		geneAbbrevConflict; gffcompare transcript match; overlap gene coordinates >90%	Ens99 gene ID import through exact transcript match from gffcompare and abbreviation match
chr20	40488776	40519109	+	LL0000000632	AL845365.1		ENSDARG00000096673.2			No transcript match by gffcompare	Ens99 gene ID import through exact transcript match from gffcompare and abbreviation match
chr5	9166395	9170534	-	LL0000000633	AL845369.1		ENSDARG00000092683.2			No transcript match by gffcompare	Ens99 gene ID import through exact transcript match from gffcompare and abbreviation match
chr5	9173538	9179436	-	LL0000000634	AL845369.2		ENSDARG00000095523.2				Ens99 gene ID import on matching gene abbreviation and > 0.8 gene coordinate overlap using intersectBed
chr16	6828552	6829635	-	LL0000000635	AL845419.1		ENSDARG00000095869.2				Ens99 gene ID import through exact transcript match from gffcompare and abbreviation match
chr15	31454930	31457948	+	LL0000000636	AL845428.1	uncharacterized LOC101883115 [Source:NCBI gene;Acc:101883115]	ENSDARG00000041007.6	101883115		geneAbbrevConflict; gffcompare transcript match; overlap gene coordinates >50%	Ens99 gene ID import through exact transcript match from gffcompare and abbreviation match
chr15	31361787	31362141	-	LL0000000637	AL845428.2		ENSDARG00000105758.2			No transcript match by gffcompare	Ens99 gene ID import through exact transcript match from gffcompare and abbreviation match
chr15	31470462	31470528	+	LL0000000638	AL845428.3		ENSDARG00000105766.2			No transcript match by gffcompare	Ens99 gene ID import through exact transcript match from gffcompare and abbreviation match
chr10	36654197	36662600	-	LL0000000639	AL845435.1		ENSDARG00000097029.2				Ens99 gene ID import through exact transcript match from gffcompare and abbreviation match
chr20	10489474	10490058	+	LL0000000640	AL845550.1	si:ch211-121d13.5 [Source:NCBI gene;Acc:101882890]	ENSDARG00000097342.2	101882890		geneAbbrevConflict; gffcompare transcript match; overlap gene coordinates >50%	geneAbbrevConflict; gffcompare transcript match; overlap gene coordinates >90%
chr1	8615535	8625266	-	LL0000000641	AL928650.1	endonuclease domain-containing 1 protein-like [Source:NCBI gene;Acc:101883376]	ENSDARG00000079332.5	101883376		exact transcript match; abbrev conflict, less than 50% gene coordinate overlap	Ens99 gene ID import through exact transcript match from gffcompare and abbreviation match
chr1	8575307	8577274	+	LL0000000642	AL928650.2		ENSDARG00000096526.2			No transcript match by gffcompare	Ens99 gene ID import through exact transcript match from gffcompare and abbreviation match
chr1	8587230	8590640	+	LL0000000643	AL928650.3	si:ch211-160d14.9 [Source:NCBI gene;Acc:103911855]	ENSDARG00000096599.2	103911855		geneAbbrevConflict; gffcompare transcript match; overlap gene coordinates >90%	Ens99 gene ID import through exact transcript match from gffcompare and abbreviation match
chr1	8579197	8587127	+	LL0000000644	AL928650.4	ATP DEPENDENT DNA HELICASE EC_3.6.4.12	ENSDARG00000113858.1			No transcript match by gffcompare	Ens99 gene ID import through exact transcript match from gffcompare and abbreviation match
chr3	40396411	40407265	-	LL0000000645	AL928657.1		ENSDARG00000097119.2			No transcript match by gffcompare	Ens99 gene ID import through exact transcript match from gffcompare and abbreviation match
chr3	40293506	40306031	+	LL0000000646	AL928657.2		ENSDARG00000116912.1				Ens99 gene ID import through exact transcript match from gffcompare and abbreviation match
chr22	6246483	6282279	-	LL0000000647	AL928685.1		ENSDARG00000095786.2	110438265		geneAbbrevConflict; gffcompare transcript match; overlap gene coordinates >90%	Ens99 gene ID import through exact transcript match from gffcompare and abbreviation match
chr22	6300064	6316980	-	LL0000000648	AL928685.2	uncharacterized LOC555502 [Source:NCBI gene;Acc:555502]	ENSDARG00000095907.2	555502		geneAbbrevConflict; gffcompare transcript match; overlap gene coordinates >90%	Ens99 gene ID import through exact transcript match from gffcompare and abbreviation match
chr22	6232552	6237393	-	LL0000000649	AL928685.3	AMBIGUOUS	ENSDARG00000115371.1				geneAbbrevConflict; gffcompare transcript match; overlap gene coordinates >90%
chr22	6323600	6367690	+	LL0000000650	AL928685.4		ENSDARG00000115582.1				geneAbbrevConflict; gffcompare transcript match; overlap gene coordinates >90%
chr21	12475055	12482236	-	LL0000000651	AL928707.1		ENSDARG00000098023.2			No transcript match by gffcompare	Ens99 gene ID import through exact transcript match from gffcompare and abbreviation match
chr21	12343684	12347702	+	LL0000000652	AL928707.2		ENSDARG00000098039.2			No transcript match by gffcompare	Ens99 gene ID import through exact transcript match from gffcompare and abbreviation match
chr21	12355585	12435062	-	LL0000000653	AL928707.3		ENSDARG00000117700.1			No transcript match by gffcompare	Ens99 gene ID import through exact transcript match from gffcompare and abbreviation match
chr10	18798927	18802350	+	LL0000000654	AL928714.1		ENSDARG00000117452.1	103911738		geneAbbrevConflict; gffcompare transcript match; overlap gene coordinates >50%	Ens99 gene ID import through exact transcript match from gffcompare and abbreviation match
chr20	24754446	24754819	+	LL0000000655	AL928716.1		ENSDARG00000096695.2			No transcript match by gffcompare	Ens99 gene ID import through exact transcript match from gffcompare and abbreviation match
chr15	20238428	20239598	-	LL0000000656	AL928724.1		ENSDARG00000097525.2				Ens99 gene ID import through exact transcript match from gffcompare and abbreviation match
chr23	16356708	16357229	+	LL0000000657	AL928725.1		ENSDARG00000095778.2			No transcript match by gffcompare	Ens99 gene ID import through exact transcript match from gffcompare and abbreviation match
chr20	17257101	17259573	-	LL0000000658	AL928808.1	EPM2A INTERACTING 1 LAFORIN INTERACTING	ENSDARG00000101333.2			No transcript match by gffcompare	Ens99 gene ID import through exact transcript match from gffcompare and abbreviation match
chr20	51168912	51173504	+	LL0000000659	AL928824.1		ENSDARG00000094456.3				Ens99 gene ID import through exact transcript match from gffcompare and abbreviation match
chr20	51062874	51156101	-	LL0000000660	AL928824.2		ENSDARG00000096744.2				Ens99 gene ID import through exact transcript match from gffcompare and abbreviation match
chr20	51062867	51156171	+	LL0000000661	AL928824.3		ENSDARG00000096753.2				Ens99 gene ID import through exact transcript match from gffcompare and abbreviation match
chr1	8507004	8510066	-	LL0000000662	AL928835.1		ENSDARG00000096583.2				Ens99 gene ID import through exact transcript match from gffcompare and abbreviation match
chr8	29688500	29700262	-	LL0000000663	AL928845.1		ENSDARG00000093227.2	795715		geneAbbrevConflict; gffcompare transcript match; overlap gene coordinates >90%	Ens99 gene ID import through exact transcript match from gffcompare and abbreviation match
chr15	31315209	31315548	-	LL0000000664	AL928851.1		ENSDARG00000105765.2			No transcript match by gffcompare	Ens99 gene ID import through exact transcript match from gffcompare and abbreviation match
chr11	38039964	38041422	-	LL0000000665	AL928854.1		ENSDARG00000105454.2				Ens99 gene ID import through exact transcript match from gffcompare and abbreviation match
chr20	28850233	28852283	+	LL0000000666	AL928866.1		ENSDARG00000095266.4			No transcript match by gffcompare	Ens99 gene ID import through exact transcript match from gffcompare and abbreviation match
chr20	28995857	29012542	+	LL0000000667	AL928866.2		ENSDARG00000117398.1			No transcript match by gffcompare	Ens99 gene ID import through exact transcript match from gffcompare and abbreviation match
chr15	31005981	31012712	-	LL0000000668	AL928870.1		ENSDARG00000097413.2			No transcript match by gffcompare	Ens99 gene ID import through exact transcript match from gffcompare and abbreviation match
chr5	23994038	24022434	+	LL0000000669	AL928875.1		ENSDARG00000112810.1				Ens99 gene ID import through exact transcript match from gffcompare and abbreviation match
chr8	24064210	24064295	+	LL0000000670	AL928881.1		ENSDARG00000106022.2				Ens99 gene ID import through exact transcript match from gffcompare and abbreviation match
chr17	26848590	26850524	+	LL0000000671	AL928908.1		ENSDARG00000097437.2				Ens99 gene ID import through exact transcript match from gffcompare and abbreviation match
chr17	26783926	26801744	-	LL0000000672	AL928908.2		ENSDARG00000097490.2				Ens99 gene ID import through exact transcript match from gffcompare and abbreviation match
chr17	26982035	26985759	-	LL0000000673	AL928908.3		ENSDARG00000097636.2				Ens99 gene ID import through exact transcript match from gffcompare and abbreviation match
chr20	43406707	43407505	-	LL0000000674	AL928920.1		ENSDARG00000094567.2			No transcript match by gffcompare	Ens99 gene ID import through exact transcript match from gffcompare and abbreviation match
chr20	43345882	43389320	-	LL0000000675	AL928920.2		ENSDARG00000096699.2				Ens99 gene ID import through exact transcript match from gffcompare and abbreviation match
chr20	43398431	43410358	-	LL0000000676	AL928920.3		ENSDARG00000096778.2				Ens99 gene ID import through exact transcript match from gffcompare and abbreviation match
chr20	43424002	43429323	+	LL0000000677	AL928920.4		ENSDARG00000096812.2			No transcript match by gffcompare	Ens99 gene ID import through exact transcript match from gffcompare and abbreviation match
chr16	29903644	29908970	+	LL0000000678	AL928927.1		ENSDARG00000097107.2			No transcript match by gffcompare	Ens99 gene ID import through exact transcript match from gffcompare and abbreviation match
chr13	28677581	28719230	-	LL0000000679	AL928951.1		ENSDARG00000102544.2				Ens99 gene ID import through exact transcript match from gffcompare and abbreviation match
chr23	22953379	22986134	+	LL0000000680	AL928977.1		ENSDARG00000094655.3			No transcript match by gffcompare	Ens99 gene ID import through exact transcript match from gffcompare and abbreviation match
chr24	21501859	21502569	+	LL0000000681	AL929009.1		ENSDARG00000096446.2			No transcript match by gffcompare	Ens99 gene ID import through exact transcript match from gffcompare and abbreviation match
chr24	21603588	21637183	-	LL0000000682	AL929009.2		ENSDARG00000113148.1				geneAbbrevConflict; gffcompare transcript match; overlap gene coordinates >90%
chr22	2328299	2340400	+	LL0000000683	AL929017.1	zgc:173693 [Source:NCBI gene;Acc:100170822]	ENSDARG00000074868.6	100170822		geneAbbrevConflict; gffcompare transcript match; overlap gene coordinates >50%	Ens99 gene ID import through exact transcript match from gffcompare and abbreviation match
chr22	2269395	2274734	+	LL0000000684	AL929017.2		ENSDARG00000095449.3				Ens99 gene ID import through exact transcript match from gffcompare and abbreviation match
chr17	25821388	25847551	-	LL0000000685	AL929023.1		ENSDARG00000114152.1				Ens99 gene ID import through exact transcript match from gffcompare and abbreviation match
chrUn_KN149688v2	16364	252015	+	LL0000000686	AL929028.1	AMBIGUOUS	ENSDARG00000105095.2				geneAbbrevConflict; gffcompare transcript match; overlap gene coordinates >90%
chr22	25007941	25008757	-	LL0000000687	AL929032.1	uncharacterized LOC795984 [Source:NCBI gene;Acc:795984]	ENSDARG00000094960.3	795984		geneAbbrevConflict; gffcompare transcript match; overlap gene coordinates >90%	Ens99 gene ID import through exact transcript match from gffcompare and abbreviation match
chr5	64656728	64671562	-	LL0000000688	AL929048.1		ENSDARG00000117298.1	103911143		geneAbbrevConflict; gffcompare transcript match; overlap gene coordinates >50%	Ens99 gene ID import through exact transcript match from gffcompare and abbreviation match
chr20	39048114	39052699	+	LL0000000689	AL929058.1	uncharacterized LOC110438186 [Source:NCBI gene;Acc:110438186]	ENSDARG00000092980.3				Ens99 gene ID import on gene abbreviation and default intersectBed stringency for gene coordinate overlap
chr15	31479657	31480566	+	LL0000000690	AL929092.1		ENSDARG00000092217.2				geneAbbrevConflict; gffcompare transcript match; overlap gene coordinates >90%
chr7	73423306	73426467	-	LL0000000691	AL929105.1		ENSDARG00000105194.2			No transcript match by gffcompare	Ens99 gene ID import through exact transcript match from gffcompare and abbreviation match
chr1	54017703	54043788	-	LL0000000692	AL929114.1		ENSDARG00000100085.2				Ens99 gene ID import through exact transcript match from gffcompare and abbreviation match
chr1	54065611	54068428	-	LL0000000693	AL929114.2		ENSDARG00000101825.2			No transcript match by gffcompare	Ens99 gene ID import through exact transcript match from gffcompare and abbreviation match
chr4	1576801	1593778	+	LL0000000694	AL929171.1	uncharacterized LOC110439353 [Source:NCBI gene;Acc:110439353]	ENSDARG00000095920.2	110439353		geneAbbrevConflict; gffcompare transcript match; overlap gene coordinates >90%	Ens99 gene ID import through exact transcript match from gffcompare and abbreviation match
chr20	30902538	30906628	+	LL0000000695	AL929182.1		ENSDARG00000097384.2				Ens99 gene ID import through exact transcript match from gffcompare and abbreviation match
chr22	25774750	25778154	+	LL0000000696	AL929192.1		ENSDARG00000106684.2	100535847		Partial transcript match; "c" classification in gffcompare	Ens99 gene ID import through exact transcript match from gffcompare and abbreviation match
chr7	48705227	48718214	+	LL0000000697	AL929208.1	proline-rich protein 5-like [Source:NCBI gene;Acc:101885386]	ENSDARG00000105788.2	101885386			Ens99 gene ID import through exact transcript match from gffcompare and abbreviation match
chr1	18186943	18237830	-	LL0000000698	AL929210.1		ENSDARG00000094943.2	101885961		exact transcript match; abbrev conflict, less than 50% gene coordinate overlap	Ens99 gene ID import through exact transcript match from gffcompare and abbreviation match
chr1	18061682	18063637	-	LL0000000699	AL929210.2		ENSDARG00000117295.1			No transcript match by gffcompare	Ens99 gene ID import through exact transcript match from gffcompare and abbreviation match
chr1	46032790	46153200	+	LL0000000700	AL929216.1		ENSDARG00000117377.1			No transcript match by gffcompare	Ens99 gene ID import through exact transcript match from gffcompare and abbreviation match
chr13	51139895	51247529	-	LL0000000701	AL929217.1	gamma-aminobutyric acid receptor subunit pi-like [Source:NCBI gene;Acc:562831]	ENSDARG00000059891.6	562831		geneAbbrevConflict; gffcompare transcript match; overlap gene coordinates >90%	Ens99 gene ID import through exact transcript match from gffcompare and abbreviation match
chr20	33461088	33462998	-	LL0000000702	AL929220.1		ENSDARG00000103323.2			No transcript match by gffcompare	Ens99 gene ID import through exact transcript match from gffcompare and abbreviation match
chr3	23096728	23180443	+	LL0000000703	AL929222.1		ENSDARG00000096994.3			No transcript match by gffcompare	Ens99 gene ID import through exact transcript match from gffcompare and abbreviation match
chr3	23220270	23238309	-	LL0000000704	AL929222.2		ENSDARG00000097738.3				Ens99 gene ID import through exact transcript match from gffcompare and abbreviation match
chr18	12451709	12453550	-	LL0000000705	AL929229.1		ENSDARG00000091975.2				Ens99 gene ID import through exact transcript match from gffcompare and abbreviation match
chr20	45987917	45996430	+	LL0000000706	AL929237.1	si:ch211-213i16.3 [Source:NCBI gene;Acc:100536429]	ENSDARG00000094104.3	100536429		geneAbbrevConflict; gffcompare transcript match; overlap gene coordinates >90%	Ens99 gene ID import through exact transcript match from gffcompare and abbreviation match
chr20	45985461	45986783	+	LL0000040393	AL929237.2		ENSDARG00000095450.3				Added to V4.2 from Ens99
chr20	45907360	45983826	-	LL0000000707	AL929237.3	si:ch211-213i16.4 [Source:NCBI gene;Acc:103909355]	ENSDARG00000096676.4	103909355		exact transcript match; abbrev conflict, less than 50% gene coordinate overlap	Ens99 gene ID import through exact transcript match from gffcompare and abbreviation match
chr20	45853154	45857670	+	LL0000000708	AL929237.4		ENSDARG00000110265.1			No transcript match by gffcompare	Ens99 gene ID import through exact transcript match from gffcompare and abbreviation match
chr6	11815638	11830250	-	LL0000000709	AL929243.1		ENSDARG00000096290.3				Ens99 gene ID import through exact transcript match from gffcompare and abbreviation match
chr9	14143073	14147153	+	LL0000000710	AL929266.1		ENSDARG00000092279.2				Ens99 gene ID import through exact transcript match from gffcompare and abbreviation match
chr22	7655271	7662596	+	LL0000000711	AL929276.1	AMBIGUOUS	ENSDARG00000113065.1	101884194		geneAbbrevConflict; gffcompare transcript match; overlap gene coordinates >50%	Ens99 gene ID import through exact transcript match from gffcompare and abbreviation match
chr22	7668434	7669624	-	LL0000000712	AL929276.2	UNCHARACTERIZED	ENSDARG00000116984.1	108181172		exact transcript match; abbrev conflict, less than 50% gene coordinate overlap	Ens99 gene ID import through exact transcript match from gffcompare and abbreviation match
chr9	49869692	49871467	+	LL0000000713	AL929294.1		ENSDARG00000117323.1			No transcript match by gffcompare	geneAbbrevConflict; gffcompare transcript match; overlap gene coordinates >90%
chr16	18365770	18374301	-	LL0000000714	AL929304.1		ENSDARG00000105264.2			No transcript match by gffcompare	Ens99 gene ID import through exact transcript match from gffcompare and abbreviation match
chr5	23622717	23647499	-	LL0000000715	AL929305.1		ENSDARG00000110179.1				geneAbbrevConflict; gffcompare transcript match; overlap gene coordinates >90%
chr7	37060405	37140213	+	LL0000000716	AL929307.1		ENSDARG00000105542.2			No transcript match by gffcompare	Ens99 gene ID import through exact transcript match from gffcompare and abbreviation match
chr25	14431539	14433008	+	LL0000000717	AL929309.1		ENSDARG00000097916.2				Ens99 gene ID import through exact transcript match from gffcompare and abbreviation match
chr10	24439620	24445992	-	LL0000000718	AL929315.1		ENSDARG00000092557.3				Ens99 gene ID import through exact transcript match from gffcompare and abbreviation match
chr21	21646654	21650890	+	LL0000000719	AL929321.1		ENSDARG00000093953.4	108180717		geneAbbrevConflict; gffcompare transcript match; overlap gene coordinates >90%	Ens99 gene ID import through exact transcript match from gffcompare and abbreviation match
chr21	21700241	21700559	+	LL0000000720	AL929321.2		ENSDARG00000105750.2			No transcript match by gffcompare	Ens99 gene ID import through exact transcript match from gffcompare and abbreviation match
chr21	21670421	21670634	+	LL0000000721	AL929321.3		ENSDARG00000105774.2			No transcript match by gffcompare	Ens99 gene ID import through exact transcript match from gffcompare and abbreviation match
chr21	21678476	21678788	+	LL0000000722	AL929321.4		ENSDARG00000105821.2			No transcript match by gffcompare	Ens99 gene ID import through exact transcript match from gffcompare and abbreviation match
chr13	24830737	24870285	-	LL0000000723	AL929334.1	DUAL SPECIFICITY PHOSPHATASE EC_3.1.3.16 EC_3.1.3.- 48	ENSDARG00000111496.1				Ens99 gene ID import through exact transcript match from gffcompare and abbreviation match
chr23	12062294	12121657	-	LL0000000724	AL929345.1		ENSDARG00000113113.1				geneAbbrevConflict; gffcompare transcript match; overlap gene coordinates >90%
chr20	11629881	11634468	-	LL0000000725	AL929349.1		ENSDARG00000096520.2			No transcript match by gffcompare	Ens99 gene ID import through exact transcript match from gffcompare and abbreviation match
chr17	35901065	36215500	-	LL0000000726	AL929378.1		ENSDARG00000117372.1			No transcript match by gffcompare	geneAbbrevConflict; gffcompare transcript match; overlap gene coordinates >90%
chr1	6664850	6669420	+	LL0000000727	AL929396.1		ENSDARG00000096530.2			No transcript match by gffcompare	Ens99 gene ID import through exact transcript match from gffcompare and abbreviation match
chr20	46553223	46554160	+	LL0000000728	AL929435.1		ENSDARG00000097234.2				Ens99 gene ID import through exact transcript match from gffcompare and abbreviation match
chr20	46614805	46694573	-	LL0000000729	AL929435.2	UNCHARACTERIZED	ENSDARG00000111953.1				Ens99 gene ID import through exact transcript match from gffcompare and abbreviation match
chr8	31349522	31382196	+	LL0000000730	AL929453.1		ENSDARG00000115950.1				Ens99 gene ID import through exact transcript match from gffcompare and abbreviation match
chr13	10287702	10346880	-	LL0000000731	AL929457.1		ENSDARG00000095483.3			No transcript match by gffcompare	Ens99 gene ID import through exact transcript match from gffcompare and abbreviation match
chr13	10409762	10457446	+	LL0000000732	AL929457.2		ENSDARG00000098067.2				Ens99 gene ID import through exact transcript match from gffcompare and abbreviation match
chr25	9853189	9998269	-	LL0000000733	AL929493.1		ENSDARG00000093575.3			No transcript match by gffcompare	Ens99 gene ID import through exact transcript match from gffcompare and abbreviation match
chr25	9968518	10019056	+	LL0000000734	AL929493.2		ENSDARG00000117535.1	110438403		partial transcript overlap; "j" class in gffcompare; no abbreviation match	Ens99 gene ID import through exact transcript match from gffcompare and abbreviation match
chr3	650429	653741	-	LL0000000735	AL929520.1		ENSDARG00000094448.3				Ens99 gene ID import through exact transcript match from gffcompare and abbreviation match
chr3	720222	722125	-	LL0000000736	AL929520.2		ENSDARG00000095426.2				Ens99 gene ID import through exact transcript match from gffcompare and abbreviation match
chr3	709393	800315	+	LL0000000737	AL929520.3	T CELL SURFACE GLYCOPROTEIN CD4 PRECURSOR T CELL SURFACE ANTIGEN T4/LEU 3 CD4 ANTIGEN	ENSDARG00000115525.1				Ens99 gene ID import through exact transcript match from gffcompare and abbreviation match
chr3	36895465	36936135	+	LL0000000738	AL929523.1		ENSDARG00000098006.3				Ens99 gene ID import through exact transcript match from gffcompare and abbreviation match
chr13	835390	840787	+	LL0000000739	AL929536.3	GLUTATHIONE S TRANSFERASE EC_2.5.1.18 GST CLASS ALPHA GLUTATHIONE S TRANSFERASE	ENSDARG00000113274.1				Ens99 gene ID import through exact transcript match from gffcompare and abbreviation match
chr13	866293	869808	-	LL0000000740	AL929536.5	GTP BINDING 2	ENSDARG00000115762.1	799373		partial transcript overlap; "j" class in gffcompare; no abbreviation match	Ens99 gene ID import through exact transcript match from gffcompare and abbreviation match
chr13	861730	865193	-	LL0000000741	AL929536.6		ENSDARG00000117000.1				Ens99 gene ID import through exact transcript match from gffcompare and abbreviation match
chr1	40837209	40902968	+	LL0000000742	AL929576.1		ENSDARG00000095566.2			No transcript match by gffcompare	Ens99 gene ID import through exact transcript match from gffcompare and abbreviation match
chr7	54609479	54651636	-	LL0000000743	AL929586.1		ENSDARG00000098634.2				Ens99 gene ID import through exact transcript match from gffcompare and abbreviation match
chr3	11363986	11375933	-	LL0000000744	AL935044.1	zinc finger protein 658B-like [Source:NCBI gene;Acc:100537716]	ENSDARG00000088051.4	100537716		geneAbbrevConflict; gffcompare transcript match; overlap gene coordinates >90%	Ens99 gene ID import through exact transcript match from gffcompare and abbreviation match
chr3	11298715	11325310	-	LL0000000745	AL935044.2	BUTYROPHILIN SUBFAMILY MEMBER	ENSDARG00000100113.2	799819		geneAbbrevConflict; gffcompare transcript match; overlap gene coordinates >90%	Ens99 gene ID import through exact transcript match from gffcompare and abbreviation match
chr3	11396628	11402110	-	LL0000000746	AL935044.3	si:ch211-190o19.1 [Source:NCBI gene;Acc:564387]	ENSDARG00000104428.2	564387		geneAbbrevConflict; gffcompare transcript match; overlap gene coordinates >50%	Ens99 gene ID import through exact transcript match from gffcompare and abbreviation match
chr3	11325670	11362383	-	LL0000000747	AL935044.4		ENSDARG00000104677.2	103910210		Partial transcript match; "c" classification in gffcompare	Ens99 gene ID import through exact transcript match from gffcompare and abbreviation match
chr7	30475836	30476382	+	LL0000000748	AL935053.1		ENSDARG00000105513.2				Ens99 gene ID import through exact transcript match from gffcompare and abbreviation match
chr5	37817387	37820878	-	LL0000000749	AL935065.1	uncharacterized LOC567472 [Source:NCBI gene;Acc:567472]	ENSDARG00000099693.2	567472		geneAbbrevConflict; gffcompare transcript match; overlap gene coordinates >50%	Ens99 gene ID import through exact transcript match from gffcompare and abbreviation match
chr5	56474733	56508203	+	LL0000000750	AL935115.1		ENSDARG00000097120.2				Ens99 gene ID import through exact transcript match from gffcompare and abbreviation match
chr18	30129771	30131831	+	LL0000000751	AL935117.1		ENSDARG00000095204.3			No transcript match by gffcompare	Ens99 gene ID import through exact transcript match from gffcompare and abbreviation match
chr7	47385216	47398680	-	LL0000000752	AL935126.1		ENSDARG00000102528.2				Ens99 gene ID import through exact transcript match from gffcompare and abbreviation match
chr7	47372795	47381146	-	LL0000000753	AL935126.2	ATP DEPENDENT DNA HELICASE EC_3.6.4.12	ENSDARG00000111309.1				Ens99 gene ID import through exact transcript match from gffcompare and abbreviation match
chr9	11822379	11855305	-	LL0000000754	AL935144.1		ENSDARG00000093040.3			No transcript match by gffcompare	Ens99 gene ID import through exact transcript match from gffcompare and abbreviation match
chr20	16719769	16721276	+	LL0000000755	AL935145.1		ENSDARG00000096400.2	103909307		geneAbbrevConflict; gffcompare transcript match; overlap gene coordinates >50%	Ens99 gene ID import through exact transcript match from gffcompare and abbreviation match
chr20	16742089	16742995	-	LL0000000756	AL935145.2		ENSDARG00000097045.2			No transcript match by gffcompare	Ens99 gene ID import through exact transcript match from gffcompare and abbreviation match
chr8	31438472	31440158	+	LL0000000757	AL935153.1		ENSDARG00000092042.3	103911520		geneAbbrevConflict; gffcompare transcript match; overlap gene coordinates >50%	Ens99 gene ID import through exact transcript match from gffcompare and abbreviation match
chr1	53364510	53368034	+	LL0000000758	AL935166.1		ENSDARG00000095991.2			No transcript match by gffcompare	Ens99 gene ID import through exact transcript match from gffcompare and abbreviation match
chr17	23236124	23275617	-	LL0000000759	AL935174.2	TBC1 DOMAIN FAMILY MEMBER 12	ENSDARG00000112088.1	563626		exact transcript match; abbrev conflict, less than 50% gene coordinate overlap	Ens99 gene ID import by transcript match; but abbreviation conflict and limited gene overlap; may be complex gene structure or incorrect Ensembl assignment
chr17	23255365	23262007	+	LL0000000760	AL935174.3	D 1B DOPAMINE RECEPTOR D 5 DOPAMINE RECEPTOR DOPAMINE D5 RECEPTOR	ENSDARG00000115129.1				geneAbbrevConflict; gffcompare transcript match; overlap gene coordinates >90%
chr17	23222177	23232294	+	LL0000000761	AL935174.5	si:ch211-195b21.5 [Source:NCBI gene;Acc:563381]	ENSDARG00000117464.1	563381		geneAbbrevConflict; gffcompare transcript match; overlap gene coordinates >90%	geneAbbrevConflict; gffcompare transcript match; overlap gene coordinates >90%
chr4	23122744	23123510	-	LL0000000762	AL935183.1		ENSDARG00000094023.2			No transcript match by gffcompare	Ens99 gene ID import through exact transcript match from gffcompare and abbreviation match
chr1	25709813	25712510	-	LL0000000763	AL935184.1		ENSDARG00000070039.5	110439814		partial transcript overlap; "j" class in gffcompare; no abbreviation match	Ens99 gene ID import through exact transcript match from gffcompare and abbreviation match
chr1	25555725	25557930	-	LL0000000764	AL935184.2		ENSDARG00000095408.2	101883053		geneAbbrevConflict; gffcompare transcript match; overlap gene coordinates >50%	Ens99 gene ID import through exact transcript match from gffcompare and abbreviation match
chr4	77709678	77712195	+	LL0000000765	AL935186.1	UNCHARACTERIZED	ENSDARG00000025046.6				Ens99 gene ID import through exact transcript match from gffcompare and abbreviation match
chr4	77580532	77676179	+	LL0000000766	AL935186.2		ENSDARG00000097345.3				geneAbbrevConflict; gffcompare transcript match; overlap gene coordinates >90%
chr4	77551100	77551860	-	LL0000000767	AL935186.6		ENSDARG00000112275.1			No transcript match by gffcompare	geneAbbrevConflict; gffcompare transcript match; overlap gene coordinates >90%
chr4	77556399	77561679	-	LL0000000768	AL935186.9	UNCHARACTERIZED	ENSDARG00000113671.1	110438638		exact transcript match; abbrev conflict, less than 50% gene coordinate overlap	Ens99 gene ID import based on gene abbreviation ONLY; may conflict with gene coordinates
chr4	77562651	77563411	-	LL0000040476	AL935186.9		ENSDARG00000113671.1				Added to V4.2 from Ens99
chr14	24075254	24110480	-	LL0000000769	AL935195.1		ENSDARG00000110728.1				Ens99 gene ID import through exact transcript match from gffcompare and abbreviation match
chr5	52055227	52057554	+	LL0000000770	AL935198.1		ENSDARG00000092975.3				Ens99 gene ID import through exact transcript match from gffcompare and abbreviation match
chr5	52012836	52015891	+	LL0000000771	AL935198.2	si:ch211-198e13.3 [Source:NCBI gene;Acc:101885999]	ENSDARG00000094622.3	101885999		geneAbbrevConflict; gffcompare transcript match; overlap gene coordinates >90%	Ens99 gene ID import through exact transcript match from gffcompare and abbreviation match
chr21	38632652	38635356	+	LL0000000772	AL935199.1	glucose-dependent insulinotropic receptor-like [Source:NCBI gene;Acc:100001479]	ENSDARG00000077746.3	100001479		geneAbbrevConflict; gffcompare transcript match; overlap gene coordinates >90%	Ens99 gene ID import through exact transcript match from gffcompare and abbreviation match
chr10	10178101	10195602	+	LL0000000773	AL935269.1		ENSDARG00000117790.1				Ens99 gene ID import through exact transcript match from gffcompare and abbreviation match
chr18	35072976	35074623	+	LL0000000774	AL935279.1		ENSDARG00000071407.6			No transcript match by gffcompare	Ens99 gene ID import through exact transcript match from gffcompare and abbreviation match
chr9	19326099	19383526	+	LL0000000775	AL935292.1		ENSDARG00000115053.1				geneAbbrevConflict; gffcompare transcript match; overlap gene coordinates >90%
chr13	3198438	3243258	-	LL0000000776	AL935294.1		ENSDARG00000100218.2			No transcript match by gffcompare	Ens99 gene ID import through exact transcript match from gffcompare and abbreviation match
chr13	3259543	3260961	+	LL0000000777	AL935294.2		ENSDARG00000104739.2			No transcript match by gffcompare	Ens99 gene ID import through exact transcript match from gffcompare and abbreviation match
chr18	24737234	24740721	+	LL0000000778	AL935295.1	si:ch211-260c23.1 [Source:NCBI gene;Acc:101885157]	ENSDARG00000092636.3	101885157		partial transcript overlap; "j" class in gffcompare; no abbreviation match	Ens99 gene ID import through exact transcript match from gffcompare and abbreviation match
chr18	24741499	24746401	-	LL0000000779	AL935295.2		ENSDARG00000117663.1			No transcript match by gffcompare	Ens99 gene ID import through exact transcript match from gffcompare and abbreviation match
chr6	27696323	27727397	-	LL0000000780	AL935299.1		ENSDARG00000116807.1				Ens99 gene ID import through exact transcript match from gffcompare and abbreviation match
chr2	948068	950247	+	LL0000000781	AL935300.1		ENSDARG00000094367.2				Ens99 gene ID import through exact transcript match from gffcompare and abbreviation match
chr2	990043	991035	+	LL0000000782	AL935300.2		ENSDARG00000097519.2			No transcript match by gffcompare	Ens99 gene ID import through exact transcript match from gffcompare and abbreviation match
chr2	923222	935517	+	LL0000000783	AL935300.3	gastrula zinc finger protein XlCGF49.1-like [Source:NCBI gene;Acc:101885450]	ENSDARG00000098661.2	101885450		exact transcript match; abbrev conflict, less than 50% gene coordinate overlap	Ens99 gene ID import through exact transcript match from gffcompare and abbreviation match
chr22	23969080	23969709	-	LL0000000784	AL935303.1		ENSDARG00000105171.2			No transcript match by gffcompare	Ens99 gene ID import through exact transcript match from gffcompare and abbreviation match
chr25	9517201	9536879	-	LL0000000785	AL935322.1		ENSDARG00000117301.1			No transcript match by gffcompare	Ens99 gene ID import through exact transcript match from gffcompare and abbreviation match
chr14	48673253	48708073	-	LL0000000786	AL935334.1		ENSDARG00000117676.1			No transcript match by gffcompare	geneAbbrevConflict; gffcompare transcript match; overlap gene coordinates >90%
chr22	26866198	26877595	+	LL0000000787	AL953841.1		ENSDARG00000094566.2			No transcript match by gffcompare	geneAbbrevConflict; gffcompare transcript match; overlap gene coordinates >90%
chr22	26832849	26844396	+	LL0000000788	AL953841.2		ENSDARG00000103121.2				geneAbbrevConflict; gffcompare transcript match; overlap gene coordinates >90%
chr17	46561140	46722470	-	LL0000000789	AL953848.2		ENSDARG00000117585.1			No transcript match by gffcompare	Ens99 gene ID import through exact transcript match from gffcompare and abbreviation match
chr1	45170046	45170652	+	LL0000000790	AL953855.1		ENSDARG00000095108.2			No transcript match by gffcompare	Ens99 gene ID import through exact transcript match from gffcompare and abbreviation match
chr19	46824723	46825683	+	LL0000000791	AL953858.1		ENSDARG00000100195.2				Ens99 gene ID import through exact transcript match from gffcompare and abbreviation match
chr1	40181404	40208237	-	LL0000000792	AL953865.1	UNCHARACTERIZED	ENSDARG00000109438.1				Ens99 gene ID import through exact transcript match from gffcompare and abbreviation match
chr21	15911517	15966900	+	LL0000000793	AL953866.1		ENSDARG00000096884.2				Ens99 gene ID import through exact transcript match from gffcompare and abbreviation match
chr22	38873310	38881445	-	LL0000000794	AL953867.1		ENSDARG00000070885.8	100307083		geneAbbrevConflict; gffcompare transcript match; overlap gene coordinates >90%	Ens99 gene ID import through exact transcript match from gffcompare and abbreviation match
chr22	38914983	38919218	+	LL0000000795	AL953867.2		ENSDARG00000095689.3				geneAbbrevConflict; gffcompare transcript match; overlap gene coordinates >90%
chr18	10106306	10190171	+	LL0000000796	AL953875.1		ENSDARG00000117502.1			No transcript match by gffcompare	Ens99 gene ID import through exact transcript match from gffcompare and abbreviation match
chr6	7453355	7453831	+	LL0000000797	AL953886.1		ENSDARG00000101745.2				Ens99 gene ID import through exact transcript match from gffcompare and abbreviation match
chr6	7429311	7435700	+	LL0000000798	AL953886.2		ENSDARG00000104298.2				Ens99 gene ID import through exact transcript match from gffcompare and abbreviation match
chr2	7080302	7080925	-	LL0000000799	AL953893.1		ENSDARG00000091894.2				Ens99 gene ID import through exact transcript match from gffcompare and abbreviation match
chr18	23186724	23190908	-	LL0000000800	AL953894.1		ENSDARG00000093393.2	103909137		geneAbbrevConflict; gffcompare transcript match; overlap gene coordinates >90%	Ens99 gene ID import through exact transcript match from gffcompare and abbreviation match
chr2	39036182	39046184	+	LL0000000801	AL953896.1		ENSDARG00000092472.3				Ens99 gene ID import through exact transcript match from gffcompare and abbreviation match
chr10	40383782	40384432	-	LL0000000802	AL953903.1		ENSDARG00000095012.3			No transcript match by gffcompare	Ens99 gene ID import through exact transcript match from gffcompare and abbreviation match
chr10	40375010	40375996	-	LL0000000803	AL953903.2		ENSDARG00000095151.3			No transcript match by gffcompare	Ens99 gene ID import through exact transcript match from gffcompare and abbreviation match
chr10	40403994	40404331	-	LL0000000804	AL953903.3		ENSDARG00000095736.2				Ens99 gene ID import through exact transcript match from gffcompare and abbreviation match
chr3	3169085	3185593	-	LL0000000805	AL953907.1		ENSDARG00000094823.3	792450		Partial transcript match; "c" classification in gffcompare	Ens99 gene ID import through exact transcript match from gffcompare and abbreviation match
chr3	3281734	3304463	-	LL0000000806	AL953907.2	UNCHARACTERIZED	ENSDARG00000113960.1				Ens99 gene ID import through exact transcript match from gffcompare and abbreviation match
chr1	10662312	10663525	+	LL0000000807	AL953910.1		ENSDARG00000103508.2			No transcript match by gffcompare	Ens99 gene ID import through exact transcript match from gffcompare and abbreviation match
chr7	23854361	23858327	-	LL0000000808	AL954129.1	uncharacterized LOC103911374 [Source:NCBI gene;Acc:103911374]	ENSDARG00000105524.2	103911374		geneAbbrevConflict; gffcompare transcript match; overlap gene coordinates >90%	Ens99 gene ID import through exact transcript match from gffcompare and abbreviation match
chr2	20699481	20704523	-	LL0000000809	AL954134.1	uncharacterized LOC101882305 [Source:NCBI gene;Acc:101882305]	ENSDARG00000092078.3	101882305		exact transcript match; abbrev conflict, less than 50% gene coordinate overlap	Ens99 gene ID import through exact transcript match from gffcompare and abbreviation match
chr2	20632221	20633527	+	LL0000000810	AL954134.2		ENSDARG00000092679.2			No transcript match by gffcompare	Ens99 gene ID import through exact transcript match from gffcompare and abbreviation match
chr11	40573943	40578255	+	LL0000000811	AL954137.1		ENSDARG00000110662.1				Ens99 gene ID import through exact transcript match from gffcompare and abbreviation match
chr11	40617896	40641787	+	LL0000000812	AL954137.2		ENSDARG00000114408.1				Ens99 gene ID import through exact transcript match from gffcompare and abbreviation match
chr3	14242119	14248150	+	LL0000000813	AL954138.1		ENSDARG00000117322.1	101884073		partial transcript overlap; "j" class in gffcompare; no abbreviation match	geneAbbrevConflict; gffcompare transcript match; overlap gene coordinates >90%
chr9	9371502	9392231	+	LL0000000814	AL954142.1	si:ch211-214p13.7 [Source:NCBI gene;Acc:564963]	ENSDARG00000092288.2	564963		geneAbbrevConflict; gffcompare transcript match; overlap gene coordinates >90%	Ens99 gene ID import through exact transcript match from gffcompare and abbreviation match
chr9	9286419	9289199	-	LL0000000815	AL954142.2		ENSDARG00000095277.3			No transcript match by gffcompare	Ens99 gene ID import through exact transcript match from gffcompare and abbreviation match
chr9	9355372	9370866	-	LL0000000816	AL954142.3		ENSDARG00000117430.1			No transcript match by gffcompare	geneAbbrevConflict; gffcompare transcript match; overlap gene coordinates >90%
chr22	38239302	38240163	-	LL0000000817	AL954145.1		ENSDARG00000094110.2				geneAbbrevConflict; gffcompare transcript match; overlap gene coordinates >90%
chr22	38245116	38250053	+	LL0000000818	AL954145.2		ENSDARG00000117560.1			No transcript match by gffcompare	geneAbbrevConflict; gffcompare transcript match; overlap gene coordinates >90%
chr23	37443288	37456618	+	LL0000000819	AL954146.1	trypsin I-P1-like [Source:NCBI gene;Acc:560023]	ENSDARG00000038891.6	560023		geneAbbrevConflict; gffcompare transcript match; overlap gene coordinates >50%	Ens99 gene ID import through exact transcript match from gffcompare and abbreviation match
chr18	4783878	4804799	-	LL0000000820	AL954149.1		ENSDARG00000094070.2			No transcript match by gffcompare	Ens99 gene ID import through exact transcript match from gffcompare and abbreviation match
chr18	4771136	4772058	+	LL0000000821	AL954149.2		ENSDARG00000094185.2			No transcript match by gffcompare	Ens99 gene ID import through exact transcript match from gffcompare and abbreviation match
chr15	27642233	27658419	-	LL0000000822	AL954187.1		ENSDARG00000096642.2			No transcript match by gffcompare	Ens99 gene ID import through exact transcript match from gffcompare and abbreviation match
chr5	13603536	13616296	+	LL0000000823	AL954191.1	uncharacterized LOC101885516 [Source:NCBI gene;Acc:101885516]	ENSDARG00000117407.1	101885516		geneAbbrevConflict; gffcompare transcript match; overlap gene coordinates >50%	geneAbbrevConflict; gffcompare transcript match; overlap gene coordinates >90%
chr1	46250113	46251822	+	LL0000000824	AL954317.1		ENSDARG00000095834.2			No transcript match by gffcompare	Ens99 gene ID import through exact transcript match from gffcompare and abbreviation match
chr25	24051048	24052227	+	LL0000000825	AL954320.1		ENSDARG00000092905.2			No transcript match by gffcompare	Ens99 gene ID import through exact transcript match from gffcompare and abbreviation match
chr15	27356825	27364137	-	LL0000000826	AL954322.2	si:ch211-229g11.6 [Source:NCBI gene;Acc:101882098]	ENSDARG00000097072.2	101882098		geneAbbrevConflict; gffcompare transcript match; overlap gene coordinates >90%	Ens99 gene ID import through exact transcript match from gffcompare and abbreviation match
chr15	27303279	27307088	-	LL0000000827	AL954322.3	si:ch211-229g11.5 [Source:NCBI gene;Acc:101886962]	ENSDARG00000097266.3	101886962		Partial transcript match; "c" classification in gffcompare	Ens99 gene ID import through exact transcript match from gffcompare and abbreviation match
chr16	34300279	34306670	-	LL0000000828	AL954327.1	endothelin-2-like [Source:NCBI gene;Acc:567978]	ENSDARG00000091368.4	567978		geneAbbrevConflict; gffcompare transcript match; overlap gene coordinates >90%	Ens99 gene ID import through exact transcript match from gffcompare and abbreviation match
chr13	20227008	20231750	-	LL0000000829	AL954359.1	si:ch211-270n8.3 [Source:NCBI gene;Acc:103911997]	ENSDARG00000093646.2	103911997		Partial transcript match; "c" classification in gffcompare	Ens99 gene ID import through exact transcript match from gffcompare and abbreviation match
chr3	53097486	53114562	+	LL0000000830	AL954361.1	epoxide hydrolase 4-like [Source:NCBI gene;Acc:570571]	ENSDARG00000078364.2	570571		exact transcript match; abbrev conflict, less than 50% gene coordinate overlap	Ens99 gene ID import through exact transcript match from gffcompare and abbreviation match
chr15	2324138	2328145	-	LL0000000831	AL954387.1		ENSDARG00000097221.2				Ens99 gene ID import through exact transcript match from gffcompare and abbreviation match
chr12	46188692	46204837	-	LL0000000832	AL954655.1		ENSDARG00000052626.6				Ens99 gene ID import through exact transcript match from gffcompare and abbreviation match
chr12	46264190	46282303	-	LL0000000833	AL954655.2		ENSDARG00000092719.4				Ens99 gene ID import through exact transcript match from gffcompare and abbreviation match
chr24	3509377	3534690	-	LL0000000834	AL954666.1		ENSDARG00000097918.2				Ens99 gene ID import through exact transcript match from gffcompare and abbreviation match
chr9	51192135	51277018	-	LL0000000835	AL954669.1		ENSDARG00000097096.2				Ens99 gene ID import through exact transcript match from gffcompare and abbreviation match
chr7	33463902	33612216	-	LL0000000836	AL954672.1		ENSDARG00000105627.2			No transcript match by gffcompare	Ens99 gene ID import through exact transcript match from gffcompare and abbreviation match
chr12	35947865	35949936	-	LL0000000837	AL954682.1	UNCHARACTERIZED	ENSDARG00000112674.1			No transcript match by gffcompare	geneAbbrevConflict; gffcompare transcript match; overlap gene coordinates >90%
chr5	40699830	40700987	+	LL0000000838	AL954694.1		ENSDARG00000092131.2	103911097		exact transcript match; abbrev conflict, less than 50% gene coordinate overlap	Ens99 gene ID import through exact transcript match from gffcompare and abbreviation match
chr5	40713335	40740829	+	LL0000000839	AL954694.2		ENSDARG00000093270.2			No transcript match by gffcompare	Ens99 gene ID import through exact transcript match from gffcompare and abbreviation match
chr1	26573435	26575260	-	LL0000000840	AL954695.1		ENSDARG00000053731.6			No transcript match by gffcompare	Ens99 gene ID import through exact transcript match from gffcompare and abbreviation match
chr1	26551034	26554839	+	LL0000000841	AL954695.2		ENSDARG00000079925.5			No transcript match by gffcompare	Ens99 gene ID import through exact transcript match from gffcompare and abbreviation match
chr1	26577288	26584593	+	LL0000000842	AL954695.3		ENSDARG00000094127.4			No transcript match by gffcompare	Ens99 gene ID import through exact transcript match from gffcompare and abbreviation match
chr2	58345157	58374842	-	LL0000000843	AL954696.1	NOP9 nucleolar protein [Source:NCBI gene;Acc:100332577]	ENSDARG00000078442.5	100332577		geneAbbrevConflict; gffcompare transcript match; overlap gene coordinates >90%	Ens99 gene ID import through exact transcript match from gffcompare and abbreviation match
chr2	58272078	58340517	-	LL0000000844	AL954696.2		ENSDARG00000117348.1			No transcript match by gffcompare	Ens99 gene ID import through exact transcript match from gffcompare and abbreviation match
chr6	39700200	39717558	+	LL0000000845	AL954698.1		ENSDARG00000098202.2				Ens99 gene ID import through exact transcript match from gffcompare and abbreviation match
chr6	39666347	39667572	+	LL0000000846	AL954698.2		ENSDARG00000102132.2				Ens99 gene ID import through exact transcript match from gffcompare and abbreviation match
chr1	9308271	9321931	-	LL0000000847	AL954703.1		ENSDARG00000117314.1			No transcript match by gffcompare	Ens99 gene ID import through exact transcript match from gffcompare and abbreviation match
chr22	1576863	1577746	+	LL0000000848	AL954741.1		ENSDARG00000099302.2				Ens99 gene ID import through exact transcript match from gffcompare and abbreviation match
chr22	1560991	1567970	+	LL0000000849	AL954741.2	ZINC FINGER	ENSDARG00000115737.1				Ens99 gene ID import through exact transcript match from gffcompare and abbreviation match
chr21	43390401	43393079	-	LL0000000850	AL954767.1		ENSDARG00000094503.2				Ens99 gene ID import through exact transcript match from gffcompare and abbreviation match
chr20	26059710	26071434	+	LL0000000851	AL954831.1		ENSDARG00000097701.2	110438180		Partial transcript match; "c" classification in gffcompare	Ens99 gene ID import through exact transcript match from gffcompare and abbreviation match
chr16	33254300	33293780	+	LL0000000852	AL954832.1		ENSDARG00000117648.1			No transcript match by gffcompare	geneAbbrevConflict; gffcompare transcript match; overlap gene coordinates >90%
chr4	12702440	12724404	+	LL0000000853	AL954848.1		ENSDARG00000110404.1				Ens99 gene ID import through exact transcript match from gffcompare and abbreviation match
chr6	52718973	52719714	+	LL0000000854	AL954861.1		ENSDARG00000097547.2	108190448		geneAbbrevConflict; gffcompare transcript match; overlap gene coordinates >50%	Ens99 gene ID import through exact transcript match from gffcompare and abbreviation match
chr6	52756334	52757276	-	LL0000000855	AL954861.2		ENSDARG00000099370.2				Ens99 gene ID import through exact transcript match from gffcompare and abbreviation match
chr5	54482325	54497319	-	LL0000000856	alad	aminolevulinate dehydratase	ENSDARG00000100372.2	550338	ZDB-GENE-050417-123	Entrez gene ID import through exact transcript match from gffcompare and abbreviation match	Ens99 gene ID import through exact transcript match from gffcompare and abbreviation match
chr11	260763	270210	-	LL0000000857	alas1	aminolevulinate, delta-, synthase 1	ENSDARG00000021059.9	64608	ZDB-GENE-001229-2	Entrez gene ID import through exact transcript match from gffcompare and abbreviation match	Ens99 gene ID import through exact transcript match from gffcompare and abbreviation match
chr8	21353878	21369028	+	LL0000000858	alas2	aminolevulinate, delta-, synthase 2	ENSDARG00000038643.6	64607	ZDB-GENE-001229-1	Entrez gene ID import through exact transcript match from gffcompare and abbreviation match	Ens99 gene ID import through exact transcript match from gffcompare and abbreviation match
chr10	28731749	28835859	-	LL0000000859	alcama	activated leukocyte cell adhesion molecule a	ENSDARG00000026531.11	30194	ZDB-GENE-990415-30	Entrez gene ID import through exact transcript match from gffcompare and abbreviation match	Ens99 gene ID import through exact transcript match from gffcompare and abbreviation match
chr15	19838447	19878992	+	LL0000000860	alcamb	activated leukocyte cell adhesion molecule b	ENSDARG00000058538.5	323919	ZDB-GENE-030131-1768	Entrez gene ID import through exact transcript match from gffcompare and abbreviation match	Ens99 gene ID import through exact transcript match from gffcompare and abbreviation match
chr3	32080323	32098537	+	LL0000000861	aldh16a1	aldehyde dehydrogenase 16 family, member A1	ENSDARG00000037935.7	492710	ZDB-GENE-070112-2062	Entrez gene ID import through exact transcript match from gffcompare and abbreviation match	Ens99 gene ID import through exact transcript match from gffcompare and abbreviation match
chr12	30761241	30810171	+	LL0000000862	aldh18a1	aldehyde dehydrogenase 18 family, member A1	ENSDARG00000099579.2	557186	ZDB-GENE-030131-5602	Entrez gene ID import through exact transcript match from gffcompare and abbreviation match	Ens99 gene ID import through exact transcript match from gffcompare and abbreviation match
chr7	30326184	30367650	-	LL0000000863	aldh1a2	aldehyde dehydrogenase 1 family, member A2	ENSDARG00000053493.6	116713	ZDB-GENE-011010-3	Entrez gene ID import through exact transcript match from gffcompare and abbreviation match	Ens99 gene ID import through exact transcript match from gffcompare and abbreviation match
chr7	9721385	9803154	-	LL0000000864	aldh1a3	aldehyde dehydrogenase 1 family, member A3	ENSDARG00000076933.5	751785	ZDB-GENE-061128-2	Entrez gene ID import through exact transcript match from gffcompare and abbreviation match	Ens99 gene ID import through exact transcript match from gffcompare and abbreviation match
chr6	22068589	22104394	+	LL0000000865	aldh1l1	aldehyde dehydrogenase 1 family, member L1	ENSDARG00000077004.5	100526683	ZDB-GENE-100519-4	Entrez gene ID import through exact transcript match from gffcompare and abbreviation match	Ens99 gene ID import through exact transcript match from gffcompare and abbreviation match
chr4	9028784	9050569	+	LL0000000866	aldh1l2	aldehyde dehydrogenase 1 family, member L2	ENSDARG00000070230.6	100333269	ZDB-GENE-100426-6	Entrez gene ID import through exact transcript match from gffcompare and abbreviation match	Ens99 gene ID import through exact transcript match from gffcompare and abbreviation match
chr5	69574677	69595487	-	LL0000000867	aldh2.1	aldehyde dehydrogenase 2 family member, tandem duplicate 1	ENSDARG00000089924.5	393462	ZDB-GENE-040426-1262	Entrez gene ID import through exact transcript match from gffcompare and abbreviation match	Ens99 gene ID import through exact transcript match from gffcompare and abbreviation match
chr5	69597162	69633819	-	LL0000000868	aldh2.2	aldehyde dehydrogenase 2 family member, tandem duplicate 2	ENSDARG00000028087.9	368239	ZDB-GENE-030326-5	Entrez gene ID import through exact transcript match from gffcompare and abbreviation match	Ens99 gene ID import through exact transcript match from gffcompare and abbreviation match
chr15	20799826	20809124	+	LL0000000869	aldh3a1	aldehyde dehydrogenase 3 family, member A1	ENSDARG00000074791.6	100000026	ZDB-GENE-120823-1	Entrez gene ID import through exact transcript match from gffcompare and abbreviation match	Ens99 gene ID import through exact transcript match from gffcompare and abbreviation match
chr15	20830146	20839910	-	LL0000000870	aldh3a2a	aldehyde dehydrogenase 3 family, member A2a	ENSDARG00000028259.9	323653	ZDB-GENE-040718-74	Entrez gene ID import through exact transcript match from gffcompare and abbreviation match	Ens99 gene ID import through exact transcript match from gffcompare and abbreviation match
chr21	39026432	39058490	-	LL0000000871	aldh3a2b	aldehyde dehydrogenase 3 family, member A2b	ENSDARG00000029381.9	447920	ZDB-GENE-040912-103	Entrez gene ID import through exact transcript match from gffcompare and abbreviation match	Ens99 gene ID import through exact transcript match from gffcompare and abbreviation match
chr3	34120184	34128952	+	LL0000000872	aldh3b1	aldehyde dehydrogenase 3 family, member B1	ENSDARG00000013839.10	282559	ZDB-GENE-021120-3	Entrez gene ID import through exact transcript match from gffcompare and abbreviation match	Ens99 gene ID import through exact transcript match from gffcompare and abbreviation match
chr5	19475829	19488621	+	LL0000000873	aldh3b2	aldehyde dehydrogenase 3 family, member B2	ENSDARG00000035606.6	557008	ZDB-GENE-060531-79	Entrez gene ID import through exact transcript match from gffcompare and abbreviation match	Ens99 gene ID import through exact transcript match from gffcompare and abbreviation match
chr11	41936403	41961452	+	LL0000000874	aldh4a1	aldehyde dehydrogenase 4 family, member A1	ENSDARG00000038207.6	394133	ZDB-GENE-040426-1179	Entrez gene ID import through exact transcript match from gffcompare and abbreviation match	Ens99 gene ID import through exact transcript match from gffcompare and abbreviation match
chr16	36932430	36945900	-	LL0000000875	aldh5a1	aldehyde dehydrogenase 5 family, member A1 (succinate-semialdehyde dehydrogenase)	ENSDARG00000076544.6	565235	ZDB-GENE-070228-2	Entrez gene ID import through exact transcript match from gffcompare and abbreviation match	Ens99 gene ID import through exact transcript match from gffcompare and abbreviation match
chr17	45071531	45104750	-	LL0000000876	aldh6a1	aldehyde dehydrogenase 6 family, member A1	ENSDARG00000053485.6	436647	ZDB-GENE-030131-9192	Entrez gene ID import through exact transcript match from gffcompare and abbreviation match	Ens99 gene ID import through exact transcript match from gffcompare and abbreviation match
chr10	16006905	16028082	-	LL0000000877	aldh7a1	aldehyde dehydrogenase 7 family, member A1	ENSDARG00000018426.7	334197	ZDB-GENE-030131-6129	Entrez gene ID import through exact transcript match from gffcompare and abbreviation match	Ens99 gene ID import through exact transcript match from gffcompare and abbreviation match
chr23	31752604	31763753	-	LL0000000878	aldh8a1	aldehyde dehydrogenase 8 family, member A1	ENSDARG00000036776.5	447801	ZDB-GENE-040912-3	Entrez gene ID import through exact transcript match from gffcompare and abbreviation match	Ens99 gene ID import through exact transcript match from gffcompare and abbreviation match
chr8	21094884	21103522	-	LL0000000879	aldh9a1a.1	aldehyde dehydrogenase 9 family, member A1a, tandem duplicate 1	ENSDARG00000069100.6	100005587	ZDB-GENE-030131-1257	Entrez gene ID import through exact transcript match from gffcompare and abbreviation match	Ens99 gene ID import through exact transcript match from gffcompare and abbreviation match
chr8	21081865	21091961	-	LL0000000880	aldh9a1a.2	aldehyde dehydrogenase 9 family, member A1a, tandem duplicate 2	ENSDARG00000055331.5	100006238	ZDB-GENE-081104-507	Entrez gene ID import through exact transcript match from gffcompare and abbreviation match	Ens99 gene ID import through exact transcript match from gffcompare and abbreviation match
chr2	6067326	6092178	+	LL0000000881	aldh9a1b	aldehyde dehydrogenase 9 family, member A1b	ENSDARG00000037061.5	399481	ZDB-GENE-040120-5	Entrez gene ID import through exact transcript match from gffcompare and abbreviation match	Ens99 gene ID import through exact transcript match from gffcompare and abbreviation match
chr3	39566999	39577052	+	LL0000000882	aldoaa	aldolase a, fructose-bisphosphate, a	ENSDARG00000011665.9	336425	ZDB-GENE-030131-8369	Entrez gene ID import through exact transcript match from gffcompare and abbreviation match	Ens99 gene ID import through exact transcript match from gffcompare and abbreviation match
chr12	4052180	4070058	-	LL0000000883	aldoab	aldolase a, fructose-bisphosphate, b	ENSDARG00000034470.4	406496	ZDB-GENE-040426-2299	Entrez gene ID import through exact transcript match from gffcompare and abbreviation match	Ens99 gene ID import through exact transcript match from gffcompare and abbreviation match
chr14	21106444	21121199	+	LL0000000884	aldob	aldolase b, fructose-bisphosphate	ENSDARG00000053684.8	321664	ZDB-GENE-030131-383	Entrez gene ID import through exact transcript match from gffcompare and abbreviation match	Ens99 gene ID import through exact transcript match from gffcompare and abbreviation match
chr15	16079586	16098531	-	LL0000000885	aldoca	aldolase C, fructose-bisphosphate, a	ENSDARG00000057661.8	792692	ZDB-GENE-050706-128	Entrez gene ID import through exact transcript match from gffcompare and abbreviation match	Ens99 gene ID import through exact transcript match from gffcompare and abbreviation match
chr21	39608637	39639954	-	LL0000000886	aldocb	aldolase C, fructose-bisphosphate, b	ENSDARG00000019702.8	369193	ZDB-GENE-030821-1	Entrez gene ID import through exact transcript match from gffcompare and abbreviation match	Ens99 gene ID import through exact transcript match from gffcompare and abbreviation match
chr3	28860283	28869640	+	LL0000000887	alg1	ALG1 chitobiosyldiphosphodolichol beta-mannosyltransferase	ENSDARG00000054963.5	334161	ZDB-GENE-030131-6093	Entrez gene ID import through exact transcript match from gffcompare and abbreviation match	Ens99 gene ID import through exact transcript match from gffcompare and abbreviation match
chr4	28374596	28381623	+	LL0000000888	alg10	ALG10 alpha-1,2-mannosyltransferase	ENSDARG00000053917.6	100331575	ZDB-GENE-110310-8	Entrez gene ID import through exact transcript match from gffcompare and abbreviation match	Ens99 gene ID import through exact transcript match from gffcompare and abbreviation match
chr1	29750937	29761086	-	LL0000000889	alg11	ALG11 alpha-1,2-mannosyltransferase	ENSDARG00000031202.6	407614	ZDB-GENE-030131-7282	Entrez gene ID import through exact transcript match from gffcompare and abbreviation match	Ens99 gene ID import through exact transcript match from gffcompare and abbreviation match
chr4	27100528	27109748	+	LL0000000890	alg12	ALG12 alpha-1,6-mannosyltransferase	ENSDARG00000041199.6	569494	ZDB-GENE-041210-295	Entrez gene ID import through exact transcript match from gffcompare and abbreviation match	Ens99 gene ID import through exact transcript match from gffcompare and abbreviation match
chr21	34233492	34261789	-	LL0000000891	alg13	ALG13 UDP-N-acetylglucosaminyltransferase subunit	ENSDARG00000054374.7	557181	ZDB-GENE-060307-1	Entrez gene ID import through exact transcript match from gffcompare and abbreviation match	Ens99 gene ID import through exact transcript match from gffcompare and abbreviation match
chr24	31201195	31223232	-	LL0000000892	alg14	ALG14 UDP-N-acetylglucosaminyltransferase subunit	ENSDARG00000103093.2	450072	ZDB-GENE-041010-195	Entrez gene ID import through exact transcript match from gffcompare and abbreviation match	Ens99 gene ID import through exact transcript match from gffcompare and abbreviation match
chr16	27215808	27224246	-	LL0000000893	alg2	ALG2 alpha-1,3/1,6-mannosyltransferase	ENSDARG00000070399.6	403068	ZDB-GENE-060502-2	Entrez gene ID import through exact transcript match from gffcompare and abbreviation match	Ens99 gene ID import through exact transcript match from gffcompare and abbreviation match
chr2	44972720	44982022	+	LL0000000894	alg3	ALG3 alpha-1,3- mannosyltransferase	ENSDARG00000053155.7	553725	ZDB-GENE-050522-334	Entrez gene ID import through exact transcript match from gffcompare and abbreviation match	Ens99 gene ID import through exact transcript match from gffcompare and abbreviation match
chr10	34984617	35002731	-	LL0000000895	alg5	ALG5 dolichyl-phosphate beta-glucosyltransferase	ENSDARG00000061235.8	751635	ZDB-GENE-030131-6586	Entrez gene ID import through exact transcript match from gffcompare and abbreviation match	Ens99 gene ID import through exact transcript match from gffcompare and abbreviation match
chr6	32065090	32087111	-	LL0000000896	alg6	ALG6 alpha-1,3-glucosyltransferase	ENSDARG00000017617.10	445327	ZDB-GENE-040808-45	Entrez gene ID import through exact transcript match from gffcompare and abbreviation match	Ens99 gene ID import through exact transcript match from gffcompare and abbreviation match
chr21	22889431	22901407	+	LL0000000897	alg8	ALG8 alpha-1,3-glucosyltransferase	ENSDARG00000044627.6	327601	ZDB-GENE-030131-5812	Entrez gene ID import through exact transcript match from gffcompare and abbreviation match	Ens99 gene ID import through exact transcript match from gffcompare and abbreviation match
chr5	57743719	57763183	+	LL0000000898	alg9	ALG9 alpha-1,2-mannosyltransferase	ENSDARG00000012840.11	393598	ZDB-GENE-040426-1270	Entrez gene ID import through exact transcript match from gffcompare and abbreviation match	Ens99 gene ID import through exact transcript match from gffcompare and abbreviation match
chr17	47187870	47305034	-	LL0000000899	alk	ALK receptor tyrosine kinase	ENSDARG00000095833.3	563509	ZDB-GENE-031027-1	partial transcript match; "j" class in gffcompare; abbreviation match	Ens99 gene ID import through exact transcript match from gffcompare and abbreviation match
chr8	18460807	18488221	+	LL0000000900	alkal1	ALK and LTK ligand 1	ENSDARG00000074387.5	100535009	ZDB-GENE-110411-243	Ens99 gene ID import through exact transcript match from gffcompare; abbrev conflict matches ZFIN alias	Ens99 gene ID import through exact transcript match from gffcompare and abbreviation match
chr23	35539901	35550386	-	LL0000000901	alkal2a	ALK and LTK ligand 2a	ENSDARG00000091073.4	101886413	ZDB-GENE-100922-116	Ens99 gene ID import through exact transcript match from gffcompare; abbrev conflict matches ZFIN alias	Ens99 gene ID import through exact transcript match from gffcompare and abbreviation match
chr17	30661348	30666037	-	LL0000000902	alkal2b	ALK and LTK ligand 2b	ENSDARG00000042815.6	100329254	ZDB-GENE-111115-2	Ens99 gene ID import through exact transcript match from gffcompare; abbrev conflict matches ZFIN alias	Ens99 gene ID import through exact transcript match from gffcompare and abbreviation match
chr17	17764979	17775192	+	LL0000000903	alkbh1	alkB homolog 1, histone H2A dioxygenase	ENSDARG00000071164.7	553720	ZDB-GENE-050522-196	Entrez gene ID import through exact transcript match from gffcompare and abbreviation match	Ens99 gene ID import through exact transcript match from gffcompare and abbreviation match
chr5	41800082	41804398	-	LL0000000904	alkbh2	alkB homolog 2, alpha-ketoglutarate-dependent dioxygenase	ENSDARG00000059856.7	569291	ZDB-GENE-060526-327	Entrez gene ID import through exact transcript match from gffcompare and abbreviation match	Ens99 gene ID import through exact transcript match from gffcompare and abbreviation match
chr25	30233638	30299662	+	LL0000000905	alkbh3	alkB homolog 3, alpha-ketoglutarate-dependent dioxygenase	ENSDARG00000045606.6	792266	ZDB-GENE-040801-254	Entrez gene ID import through exact transcript match from gffcompare and abbreviation match	Ens99 gene ID import through exact transcript match from gffcompare and abbreviation match
chr5	61467618	61472766	+	LL0000000906	alkbh4	alkB homolog 4, lysine demthylase	ENSDARG00000052247.5	553475	ZDB-GENE-060526-275	Entrez gene ID import through exact transcript match from gffcompare and abbreviation match	Ens99 gene ID import through exact transcript match from gffcompare and abbreviation match
chr1	8508550	8518235	+	LL0000000907	alkbh5	alkB homolog 5, RNA demethylase	ENSDARG00000063003.6	570158	ZDB-GENE-061013-602	Entrez gene ID import through exact transcript match from gffcompare and abbreviation match	Ens99 gene ID import through exact transcript match from gffcompare and abbreviation match
chr5	36650064	36654698	+	LL0000000908	alkbh6	alkB homolog 6	ENSDARG00000077253.3	317736	ZDB-GENE-060407-1	Entrez gene ID import through exact transcript match from gffcompare and abbreviation match	Ens99 gene ID import through exact transcript match from gffcompare and abbreviation match
chr3	33918510	33922150	+	LL0000000909	alkbh7	alkB homolog 7	ENSDARG00000037906.6	550272	ZDB-GENE-050417-78	Entrez gene ID import through exact transcript match from gffcompare and abbreviation match	Ens99 gene ID import through exact transcript match from gffcompare and abbreviation match
chr16	42156060	42177538	-	LL0000000910	alkbh8	alkB homolog 8, tRNA methyltransferase	ENSDARG00000060256.6	556362	ZDB-GENE-100922-251	Entrez gene ID import through exact transcript match from gffcompare and abbreviation match	Ens99 gene ID import through exact transcript match from gffcompare and abbreviation match
chr20	30355435	30370940	-	LL0000000911	allc	allantoicase	ENSDARG00000042562.8	436989	ZDB-GENE-040718-471	Entrez gene ID import through exact transcript match from gffcompare and abbreviation match	Ens99 gene ID import through exact transcript match from gffcompare and abbreviation match
chr13	9368556	9406159	+	LL0000000912	alms1	ALMS1 centrosome and basal body associated protein	ENSDARG00000074779.5	561882	ZDB-GENE-030131-4837	Entrez gene ID import through exact transcript match from gffcompare and abbreviation match	Ens99 gene ID import through exact transcript match from gffcompare and abbreviation match
chr7	26029593	26048120	+	LL0000000913	alox12	arachidonate 12-lipoxygenase	ENSDARG00000069463.5	322732	ZDB-GENE-030131-1452	Entrez gene ID import through exact transcript match from gffcompare and abbreviation match	Ens99 gene ID import through exact transcript match from gffcompare and abbreviation match
chr13	18122738	18174931	-	LL0000000914	alox5a	arachidonate 5-lipoxygenase a	ENSDARG00000057273.6	567204	ZDB-GENE-090311-47	Entrez gene ID import through exact transcript match from gffcompare and abbreviation match	Ens99 gene ID import through exact transcript match from gffcompare and abbreviation match
chr10	36458563	36463715	+	LL0000000915	alox5ap	arachidonate 5-lipoxygenase-activating protein	ENSDARG00000054755.7	337376	ZDB-GENE-030131-9322	Entrez gene ID import through exact transcript match from gffcompare and abbreviation match	Ens99 gene ID import through exact transcript match from gffcompare and abbreviation match
chr15	942143	952891	-	LL0000000916	alox5b.1	arachidonate 5-lipoxygenase b, tandem duplicate 1	ENSDARG00000043085.6	573013	ZDB-GENE-131219-3	Entrez gene ID import through exact transcript match from gffcompare and abbreviation match	Ens99 gene ID import through exact transcript match from gffcompare and abbreviation match
chr15	963215	976353	+	LL0000000917	alox5b.2	arachidonate 5-lipoxygenase b, tandem duplicate 2	ENSDARG00000043089.8	724056	ZDB-GENE-060623-19	Entrez gene ID import through exact transcript match from gffcompare and abbreviation match	Ens99 gene ID import through exact transcript match from gffcompare and abbreviation match
chr15	590670	604353	-	LL0000000918	alox5b.3	arachidonate 5-lipoxygenase b, tandem duplicate 3	ENSDARG00000069966.4	553602	ZDB-GENE-050522-330	Entrez gene ID import through exact transcript match from gffcompare and abbreviation match	Ens99 gene ID import through exact transcript match from gffcompare and abbreviation match
chr21	25544882	25555355	-	LL0000000919	ALOXE3	si:dkey-17e16.9 [Source:ZFIN;Acc:ZDB-GENE-091118-123]	ENSDARG00000073781.5	794132	ZDB-GENE-091118-123	partial transcript overlap; "j" class in gffcompare; no abbreviation match	geneAbbrevConflict; gffcompare transcript match; overlap gene coordinates >90%
chr15	44618623	44637492	-	LL0000000920	alp3	alkaline phosphatase 3	ENSDARG00000098063.3	100330410	ZDB-GENE-120919-1	Entrez gene ID import through exact transcript match from gffcompare and abbreviation match	Ens99 gene ID import through exact transcript match from gffcompare and abbreviation match
chr22	38762693	38779462	+	LL0000000921	alpi.1	alkaline phosphatase, intestinal, tandem duplicate 1	ENSDARG00000015273.13	541539	ZDB-GENE-050327-78	Entrez gene ID import through exact transcript match from gffcompare and abbreviation match	Ens99 gene ID import through exact transcript match from gffcompare and abbreviation match
chr22	38778649	38794610	-	LL0000000922	alpi.2	alkaline phosphatase, intestinal, tandem duplicate 2	ENSDARG00000053774.8	574009	ZDB-GENE-050626-142	Entrez gene ID import through exact transcript match from gffcompare and abbreviation match	Ens99 gene ID import through exact transcript match from gffcompare and abbreviation match
chr21	10858832	10880565	+	LL0000000923	alpk2	alpha-kinase 2	ENSDARG00000079637.5	559835	ZDB-GENE-030131-1868	Entrez gene ID import through exact transcript match from gffcompare and abbreviation match	Ens99 gene ID import through exact transcript match from gffcompare and abbreviation match
chr18	26719787	26755230	+	LL0000000924	alpk3a	alpha-kinase 3a	ENSDARG00000078989.5	100321139	ZDB-GENE-050419-48	partial transcript match; "j" class in gffcompare; abbreviation match	Ens99 gene ID import through exact transcript match from gffcompare and abbreviation match
chr7	30109978	30132573	-	LL0000000925	alpk3b	alpha-kinase 3b	ENSDARG00000105630.2	100534893	ZDB-GENE-121101-3	Entrez gene ID import through exact transcript match from gffcompare and abbreviation match	Ens99 gene ID import through exact transcript match from gffcompare and abbreviation match
chr11	27968735	28013407	+	LL0000000926	alpl	alkaline phosphatase, biomineralization associated	ENSDARG00000015546.12	393982	ZDB-GENE-040420-1	Entrez gene ID import through exact transcript match from gffcompare and abbreviation match	Ens99 gene ID import through exact transcript match from gffcompare and abbreviation match
chr9	13628635	13673796	+	LL0000000927	als2a	alsin Rho guanine nucleotide exchange factor ALS2 a	ENSDARG00000075111.6	557014	ZDB-GENE-070402-2	Entrez gene ID import through exact transcript match from gffcompare and abbreviation match	Ens99 gene ID import through exact transcript match from gffcompare and abbreviation match
chr6	9793495	9861196	+	LL0000000928	als2b	alsin Rho guanine nucleotide exchange factor ALS2 b	ENSDARG00000076924.5	100318899	ZDB-GENE-080929-1	Entrez gene ID import through exact transcript match from gffcompare and abbreviation match	Ens99 gene ID import through exact transcript match from gffcompare and abbreviation match
chr18	16245838	16256921	+	LL0000000929	alx1	ALX homeobox 1	ENSDARG00000062824.5	565176	ZDB-GENE-050419-191	Entrez gene ID import through exact transcript match from gffcompare and abbreviation match	Ens99 gene ID import through exact transcript match from gffcompare and abbreviation match
chr7	26893688	26924903	-	LL0000000930	alx4a	ALX homeobox 4a	ENSDARG00000088332.4	100006399	ZDB-GENE-070712-3	Entrez gene ID import through exact transcript match from gffcompare and abbreviation match	Ens99 gene ID import through exact transcript match from gffcompare and abbreviation match
chr18	38321039	38366232	+	LL0000000931	alx4b	ALX homeobox 4b	ENSDARG00000074442.7	497424	ZDB-GENE-050208-140	Entrez gene ID import through exact transcript match from gffcompare and abbreviation match	Ens99 gene ID import through exact transcript match from gffcompare and abbreviation match
chr3	59880208	59891841	+	LL0000000932	alyref	Aly/REF export factor	ENSDARG00000077732.4	560127	ZDB-GENE-070928-29	Entrez gene ID import through exact transcript match from gffcompare and abbreviation match	Ens99 gene ID import through exact transcript match from gffcompare and abbreviation match
chr21	19418563	19444864	+	LL0000000933	amacr	alpha-methylacyl-CoA racemase	ENSDARG00000057435.5	553653	ZDB-GENE-050522-484	Entrez gene ID import through exact transcript match from gffcompare and abbreviation match	Ens99 gene ID import through exact transcript match from gffcompare and abbreviation match
chr1	43926097	43934274	-	LL0000000934	ambn	ameloblastin	ENSDARG00000075598.6	100001700	ZDB-GENE-090313-258	Ens99 gene ID import through exact transcript match from gffcompare; abbrev conflict matches ZFIN alias	Ens99 gene ID import through exact transcript match from gffcompare and abbreviation match
chr10	10801564	10824286	+	LL0000000935	ambp	alpha-1-microglobulin/bikunin precursor	ENSDARG00000004296.8	394093	ZDB-GENE-040426-1608	Entrez gene ID import through exact transcript match from gffcompare and abbreviation match	Ens99 gene ID import through exact transcript match from gffcompare and abbreviation match
chr7	39253479	39360340	-	LL0000000936	ambra1a	autophagy/beclin-1 regulator 1a	ENSDARG00000008322.11	100332642	ZDB-GENE-111104-2	Entrez gene ID import through exact transcript match from gffcompare and abbreviation match	Ens99 gene ID import through exact transcript match from gffcompare and abbreviation match
chr25	7888019	7918526	-	LL0000000937	ambra1b	autophagy/beclin-1 regulator 1b	ENSDARG00000039878.7	559106	ZDB-GENE-050208-235	Entrez gene ID import through exact transcript match from gffcompare and abbreviation match	Ens99 gene ID import through exact transcript match from gffcompare and abbreviation match
chr20	2949807	2978968	+	LL0000000938	amd1	adenosylmethionine decarboxylase 1	ENSDARG00000043856.8	792097	ZDB-GENE-040426-760	Entrez gene ID import through exact transcript match from gffcompare and abbreviation match	Ens99 gene ID import through exact transcript match from gffcompare and abbreviation match
chr7	19389304	19401501	+	LL0000000939	AMDHD1	si:ch73-71d17.1 [Source:ZFIN;Acc:ZDB-GENE-160728-110]	ENSDARG00000007366.9	402826	ZDB-GENE-160728-110	geneAbbrevConflict; gffcompare transcript match; overlap gene coordinates >90%	Ens99 gene ID import through exact transcript match from gffcompare and abbreviation match
chr3	13523773	13546610	-	LL0000000940	amdhd2	amidohydrolase domain containing 2	ENSDARG00000100376.2	402981	ZDB-GENE-040426-1871	Entrez gene ID import through exact transcript match from gffcompare and abbreviation match	Ens99 gene ID import through exact transcript match from gffcompare and abbreviation match
chr5	22011575	22019061	-	LL0000000941	amer1	APC membrane recruitment protein 1	ENSDARG00000079624.4	100885784	ZDB-GENE-070719-2	Entrez gene ID import through exact transcript match from gffcompare and abbreviation match	Ens99 gene ID import through exact transcript match from gffcompare and abbreviation match
chr24	25069609	25073032	+	LL0000000942	amer2	APC membrane recruitment protein 2	ENSDARG00000075222.3	100101649	ZDB-GENE-070719-5	Entrez gene ID import through exact transcript match from gffcompare and abbreviation match	Ens99 gene ID import through exact transcript match from gffcompare and abbreviation match
chr25	36197733	36218048	-	LL0000000943	amfra	autocrine motility factor receptor a	ENSDARG00000020218.9	406442	ZDB-GENE-040426-2190	Ens99 gene ID import through exact transcript match from gffcompare; abbrev conflict matches ZFIN alias	Ens99 gene ID import through exact transcript match from gffcompare and abbreviation match
chr7	35245594	35271142	+	LL0000000944	amfrb	autocrine motility factor receptor b	ENSDARG00000105578.2	101884807	ZDB-GENE-130530-643	Entrez gene ID import through exact transcript match from gffcompare and abbreviation match	Ens99 gene ID import through exact transcript match from gffcompare and abbreviation match
chr22	20746888	20761759	-	LL0000000945	amh	anti-Mullerian hormone	ENSDARG00000014357.8	493624	ZDB-GENE-050706-192	Entrez gene ID import through exact transcript match from gffcompare and abbreviation match	Ens99 gene ID import through exact transcript match from gffcompare and abbreviation match
chr8	25111936	25120269	-	LL0000000946	amigo1	adhesion molecule with Ig-like domain 1	ENSDARG00000079620.5	100144409	ZDB-GENE-060503-114	Entrez gene ID import through exact transcript match from gffcompare and abbreviation match	Ens99 gene ID import through exact transcript match from gffcompare and abbreviation match
chr22	34429136	34461179	+	LL0000000947	amigo3	adhesion molecule with Ig-like domain 3	ENSDARG00000074469.6	100000131	ZDB-GENE-050208-449	Entrez gene ID import through exact transcript match from gffcompare and abbreviation match	Ens99 gene ID import through exact transcript match from gffcompare and abbreviation match
chr21	44704089	44732684	-	LL0000000948	ammecr1	AMMECR nuclear protein 1	ENSDARG00000012892.11	393553	ZDB-GENE-040426-1533	Entrez gene ID import through exact transcript match from gffcompare and abbreviation match	Ens99 gene ID import through exact transcript match from gffcompare and abbreviation match
chr3	56874396	56877918	+	LL0000000949	amn	amnion associated transmembrane protein	ENSDARG00000062947.7	793454	ZDB-GENE-060810-59	Entrez gene ID import through exact transcript match from gffcompare and abbreviation match	Ens99 gene ID import through exact transcript match from gffcompare and abbreviation match
chr25	28893615	28903894	+	LL0000000950	amn1	antagonist of mitotic exit network 1 homolog (S. cerevisiae)	ENSDARG00000070478.5	751744	ZDB-GENE-060825-13	Entrez gene ID import through exact transcript match from gffcompare and abbreviation match	Ens99 gene ID import through exact transcript match from gffcompare and abbreviation match
chr21	37477001	37550854	+	LL0000000951	amot	angiomotin	ENSDARG00000078335.5	563421	ZDB-GENE-030131-7487	Entrez gene ID import through exact transcript match from gffcompare and abbreviation match	Ens99 gene ID import through exact transcript match from gffcompare and abbreviation match
chr6	27991943	28001131	+	LL0000000952	amotl2a	angiomotin like 2a	ENSDARG00000061923.5	558920	ZDB-GENE-030131-9770	Entrez gene ID import through exact transcript match from gffcompare and abbreviation match	Ens99 gene ID import through exact transcript match from gffcompare and abbreviation match
chr2	22851832	22861178	+	LL0000000953	amotl2b	angiomotin like 2b	ENSDARG00000061948.6	559784	ZDB-GENE-061103-307	Entrez gene ID import through exact transcript match from gffcompare and abbreviation match	Ens99 gene ID import through exact transcript match from gffcompare and abbreviation match
chr8	11080571	11112622	-	LL0000000954	ampd1	adenosine monophosphate deaminase 1 (isoform M)	ENSDARG00000033832.8	393867	ZDB-GENE-040426-1906	Entrez gene ID import through exact transcript match from gffcompare and abbreviation match	Ens99 gene ID import through exact transcript match from gffcompare and abbreviation match
chr22	1205787	1245226	-	LL0000000955	ampd2a	adenosine monophosphate deaminase 2a	ENSDARG00000104491.3	100330772	ZDB-GENE-091204-4	partial transcript match; "j" class in gffcompare; abbreviation match	Ens99 gene ID import through exact transcript match from gffcompare and abbreviation match
chr8	25244074	25293690	+	LL0000000956	ampd2b	adenosine monophosphate deaminase 2b	ENSDARG00000029952.10	571355	ZDB-GENE-070713-5	Entrez gene ID import through exact transcript match from gffcompare and abbreviation match	Ens99 gene ID import through exact transcript match from gffcompare and abbreviation match
chr7	66836202	66868543	-	LL0000000957	ampd3a	adenosine monophosphate deaminase 3a	ENSDARG00000005800.10	556578	ZDB-GENE-110407-2	Entrez gene ID import through exact transcript match from gffcompare and abbreviation match	Ens99 gene ID import through exact transcript match from gffcompare and abbreviation match
chr18	16762391	16796789	-	LL0000000958	ampd3b	adenosine monophosphate deaminase 3b	ENSDARG00000032469.11	333997	ZDB-GENE-030131-5929	Entrez gene ID import through exact transcript match from gffcompare and abbreviation match	Ens99 gene ID import through exact transcript match from gffcompare and abbreviation match
chr2	31891226	31937032	-	LL0000000959	amph	amphiphysin	ENSDARG00000007663.9	393804	ZDB-GENE-040426-1711	Entrez gene ID import through exact transcript match from gffcompare and abbreviation match	Ens99 gene ID import through exact transcript match from gffcompare and abbreviation match
chr8	26396506	26409423	+	LL0000000960	amt	aminomethyltransferase	ENSDARG00000010862.11	450000	ZDB-GENE-041010-114	Entrez gene ID import through exact transcript match from gffcompare and abbreviation match	Ens99 gene ID import through exact transcript match from gffcompare and abbreviation match
chr2	15612749	15626972	+	LL0000000961	amy2a	amylase alpha 2A	ENSDARG00000013856.7	406539	ZDB-GENE-040426-2393	Entrez gene ID import through exact transcript match from gffcompare and abbreviation match	Ens99 gene ID import through exact transcript match from gffcompare and abbreviation match
chr13	47007075	47178279	+	LL0000000962	anapc1	anaphase promoting complex subunit 1	ENSDARG00000075687.5	568795	ZDB-GENE-081107-12	Entrez gene ID import through exact transcript match from gffcompare and abbreviation match	Ens99 gene ID import through exact transcript match from gffcompare and abbreviation match
chr23	43718115	43723929	+	LL0000000963	anapc10	anaphase promoting complex subunit 10	ENSDARG00000090152.5	798352	ZDB-GENE-060224-2	Entrez gene ID import through exact transcript match from gffcompare and abbreviation match	Ens99 gene ID import through exact transcript match from gffcompare and abbreviation match
chr6	18244220	18250881	-	LL0000000964	anapc11	APC11 anaphase promoting complex subunit 11 homolog (yeast)	ENSDARG00000102531.2	768140	ZDB-GENE-061013-383	Entrez gene ID import through exact transcript match from gffcompare and abbreviation match	Ens99 gene ID import through exact transcript match from gffcompare and abbreviation match
chr21	24536233	24537061	+	LL0000000965	anapc13	anaphase promoting complex subunit 13	ENSDARG00000078435.5	569473	ZDB-GENE-091204-298	Entrez gene ID import through exact transcript match from gffcompare and abbreviation match	Ens99 gene ID import through exact transcript match from gffcompare and abbreviation match
chr15	47334247	47339181	-	LL0000000966	anapc15	anaphase promoting complex subunit 15	ENSDARG00000101285.3	751740	ZDB-GENE-060825-43	Entrez gene ID import through exact transcript match from gffcompare and abbreviation match	Ens99 gene ID import through exact transcript match from gffcompare and abbreviation match
chr12	48319221	48327599	+	LL0000000967	anapc16	anaphase promoting complex subunit 16	ENSDARG00000013822.10	550576	ZDB-GENE-050417-430	Entrez gene ID import through exact transcript match from gffcompare and abbreviation match	Ens99 gene ID import through exact transcript match from gffcompare and abbreviation match
chr5	54555567	54580564	+	LL0000000968	anapc2	anaphase promoting complex subunit 2	ENSDARG00000105035.2	100318335	ZDB-GENE-081104-256	Entrez gene ID import through exact transcript match from gffcompare and abbreviation match	Ens99 gene ID import through exact transcript match from gffcompare and abbreviation match
chr20	23475377	23494714	-	LL0000000969	anapc4	anaphase promoting complex subunit 4	ENSDARG00000032237.8	494046	ZDB-GENE-041212-10	Entrez gene ID import through exact transcript match from gffcompare and abbreviation match	Ens99 gene ID import through exact transcript match from gffcompare and abbreviation match
chr8	40185600	40205712	-	LL0000000970	anapc5	anaphase promoting complex subunit 5	ENSDARG00000008461.9	322854	ZDB-GENE-030131-1574	Entrez gene ID import through exact transcript match from gffcompare and abbreviation match	Ens99 gene ID import through exact transcript match from gffcompare and abbreviation match
chr8	11745022	11770279	-	LL0000000971	anapc7	anaphase promoting complex subunit 7	ENSDARG00000063005.7	558402	ZDB-GENE-081104-113	Entrez gene ID import through exact transcript match from gffcompare and abbreviation match	Ens99 gene ID import through exact transcript match from gffcompare and abbreviation match
chr24	26277390	26283359	-	LL0000000972	and1	actinodin1	ENSDARG00000088514.4	794315	ZDB-GENE-030131-9105	Entrez gene ID import through exact transcript match from gffcompare and abbreviation match	Ens99 gene ID import through exact transcript match from gffcompare and abbreviation match
chr2	31762852	31767827	-	LL0000000973	and2	actinodin2	ENSDARG00000079302.4	566702	ZDB-GENE-041105-2	Entrez gene ID import through exact transcript match from gffcompare and abbreviation match	Ens99 gene ID import through exact transcript match from gffcompare and abbreviation match
chr10	22848556	22854758	-	LL0000000974	and3	actinodin3	ENSDARG00000056873.5	561047	ZDB-GENE-040724-185	Entrez gene ID import through exact transcript match from gffcompare and abbreviation match	Ens99 gene ID import through exact transcript match from gffcompare and abbreviation match
chr14	79733	80193	-	LL0000000975	and4	actinodin4		100192207	ZDB-GENE-081022-5	Entrez gene ID import through exact transcript match from gffcompare and abbreviation match	multiple overlapping gene/transcript annotations preventing unambiguous assignment of Ens99 gene ID
chr17	52612866	52643968	+	LL0000000976	angel1	angel homolog 1 (Drosophila)	ENSDARG00000077567.4	569547	ZDB-GENE-111020-12	Entrez gene ID import through exact transcript match from gffcompare and abbreviation match	Ens99 gene ID import through exact transcript match from gffcompare and abbreviation match
chr20	37919130	37934427	-	LL0000000977	angel2	angel homolog 2 (Drosophila)	ENSDARG00000016743.12	562704	ZDB-GENE-030131-6498	Entrez gene ID import through exact transcript match from gffcompare and abbreviation match	Ens99 gene ID import through exact transcript match from gffcompare and abbreviation match
chr19	46807124	46958201	-	LL0000000978	angpt1	angiopoietin 1	ENSDARG00000030364.8	114407	ZDB-GENE-010817-1	Entrez gene ID import through exact transcript match from gffcompare and abbreviation match	Ens99 gene ID import through exact transcript match from gffcompare and abbreviation match
chr13	6295173	6306886	+	LL0000000979	angpt2a	angiopoietin 2a	ENSDARG00000014946.10	101101687	ZDB-GENE-121101-1	Entrez gene ID import through exact transcript match from gffcompare and abbreviation match	Ens99 gene ID import through exact transcript match from gffcompare and abbreviation match
chr19	35799235	35853027	+	LL0000000980	angpt2b	angiopoietin 2b	ENSDARG00000053906.6	114408	ZDB-GENE-010817-2	Entrez gene ID import through exact transcript match from gffcompare and abbreviation match	Ens99 gene ID import through exact transcript match from gffcompare and abbreviation match
chr6	51852333	52032064	+	LL0000000981	angpt4	angiopoietin 4	ENSDARG00000076787.5	571050	ZDB-GENE-110104-1	Entrez gene ID import through exact transcript match from gffcompare and abbreviation match	Ens99 gene ID import through exact transcript match from gffcompare and abbreviation match
chr20	15982482	16007636	+	LL0000000982	angptl1a	angiopoietin-like 1a	ENSDARG00000012071.10	544656	ZDB-GENE-040724-269	Entrez gene ID import through exact transcript match from gffcompare and abbreviation match	Ens99 gene ID import through exact transcript match from gffcompare and abbreviation match
chr2	97692	103388	-	LL0000000983	angptl1b	angiopoietin-like 1b	ENSDARG00000100159.2	334311	ZDB-GENE-030131-6243	Entrez gene ID import through exact transcript match from gffcompare and abbreviation match	Ens99 gene ID import through exact transcript match from gffcompare and abbreviation match
chr5	4797317	4830404	+	LL0000000984	angptl2a	angiopoietin-like 2a	ENSDARG00000024030.9	569092	ZDB-GENE-080721-15	Entrez gene ID import through exact transcript match from gffcompare and abbreviation match	Ens99 gene ID import through exact transcript match from gffcompare and abbreviation match
chr8	33019990	33051355	+	LL0000000985	angptl2b	angiopoietin-like 2b	ENSDARG00000068369.8	503514	ZDB-GENE-050624-1	Entrez gene ID import through exact transcript match from gffcompare and abbreviation match	Ens99 gene ID import through exact transcript match from gffcompare and abbreviation match
chr6	32343377	32354467	-	LL0000000986	angptl3	angiopoietin-like 3	ENSDARG00000044365.8	114421	ZDB-GENE-010817-3	Entrez gene ID import through exact transcript match from gffcompare and abbreviation match	Ens99 gene ID import through exact transcript match from gffcompare and abbreviation match
chr2	24536762	24542522	+	LL0000000987	angptl4	angiopoietin-like 4	ENSDARG00000035859.9	492647	ZDB-GENE-041111-222	Entrez gene ID import through exact transcript match from gffcompare and abbreviation match	Ens99 gene ID import through exact transcript match from gffcompare and abbreviation match
chr21	22820852	22831388	-	LL0000000988	angptl5	angiopoietin-like 5	ENSDARG00000056630.6	566212	ZDB-GENE-030131-5054	Entrez gene ID import through exact transcript match from gffcompare and abbreviation match	Ens99 gene ID import through exact transcript match from gffcompare and abbreviation match
chr3	54524226	54550728	-	LL0000000989	angptl6	angiopoietin-like 6	ENSDARG00000020265.10	561927	ZDB-GENE-030131-9735	Entrez gene ID import through exact transcript match from gffcompare and abbreviation match	Ens99 gene ID import through exact transcript match from gffcompare and abbreviation match
chr8	46217861	46221296	+	LL0000000990	angptl7	angiopoietin-like 7	ENSDARG00000027582.10	450053	ZDB-GENE-041010-175	Entrez gene ID import through exact transcript match from gffcompare and abbreviation match	Ens99 gene ID import through exact transcript match from gffcompare and abbreviation match
chr5	68897755	69115720	-	LL0000000991	ank1a	ankyrin 1, erythrocytic a	ENSDARG00000092143.3	449796	ZDB-GENE-041010-44	Entrez gene ID import through exact transcript match from gffcompare and abbreviation match	Ens99 gene ID import through exact transcript match from gffcompare and abbreviation match
chr21	21025534	21148623	-	LL0000000992	ank1b	ankyrin 1, erythrocytic b	ENSDARG00000074777.6	797662	ZDB-GENE-091113-6	partial transcript match; "j" class in gffcompare; abbreviation match	Ens99 gene ID import through exact transcript match from gffcompare and abbreviation match
chr1	14029159	14160253	+	LL0000000993	ank2a	ankyrin 2a, neuronal	ENSDARG00000009026.10	568926	ZDB-GENE-111215-3	Entrez gene ID import through exact transcript match from gffcompare and abbreviation match	Ens99 gene ID import on gene abbreviation and default intersectBed stringency for gene coordinate overlap
chr7	57885871	58130722	-	LL0000000994	ank2b	ankyrin 2b, neuronal	ENSDARG00000043313.8	450043	ZDB-GENE-041010-165	Entrez gene ID import through exact transcript match from gffcompare and abbreviation match	Ens99 gene ID import through exact transcript match from gffcompare and abbreviation match
chr17	20701582	20897407	-	LL0000000995	ank3a	ankyrin 3a	ENSDARG00000061736.7	103909035	ZDB-GENE-060621-1	Entrez gene ID import through exact transcript match from gffcompare and abbreviation match	Ens99 gene ID import through exact transcript match from gffcompare and abbreviation match
chr12	7640450	7992115	-	LL0000000996	ank3b	ankyrin 3b	ENSDARG00000110151.1	100126016	ZDB-GENE-060621-2	Entrez gene ID import through exact transcript match from gffcompare and abbreviation match	Ens99 gene ID import through exact transcript match from gffcompare and abbreviation match
chr9	41045874	41077934	-	LL0000000997	ankar	ankyrin and armadillo repeat containing	ENSDARG00000000516.12	368636	ZDB-GENE-030616-533	Entrez gene ID import through exact transcript match from gffcompare and abbreviation match	Ens99 gene ID import through exact transcript match from gffcompare and abbreviation match
chr7	13582256	13618942	+	LL0000000998	ankdd1a	ankyrin repeat and death domain containing 1A	ENSDARG00000098647.4	569271	ZDB-GENE-070615-8	Entrez gene ID import through exact transcript match from gffcompare and abbreviation match	Ens99 gene ID import through exact transcript match from gffcompare and abbreviation match
chr5	45915944	45938325	+	LL0000000999	ankdd1b	ankyrin repeat and death domain containing 1B	ENSDARG00000025866.9	562681	ZDB-GENE-060526-136	Entrez gene ID import through exact transcript match from gffcompare and abbreviation match	Ens99 gene ID import through exact transcript match from gffcompare and abbreviation match
chr20	34868933	34902205	+	LL0000001000	ankef1a	ankyrin repeat and EF-hand domain containing 1a	ENSDARG00000019135.6	566413	ZDB-GENE-041001-196	Entrez gene ID import through exact transcript match from gffcompare and abbreviation match	Ens99 gene ID import through exact transcript match from gffcompare and abbreviation match
chr17	12397024	12408109	-	LL0000001001	ankef1b	ankyrin repeat and EF-hand domain containing 1b	ENSDARG00000060211.7	100149106	ZDB-GENE-060810-68	partial transcript match; "j" class in gffcompare; abbreviation match	Ens99 gene ID import through exact transcript match from gffcompare and abbreviation match
chr12	32292564	32378437	+	LL0000001002	ANKFN1	si:ch211-277e21.2 [Source:ZFIN;Acc:ZDB-GENE-130603-21]	ENSDARG00000060941.7	100333998	ZDB-GENE-130603-21	partial transcript overlap; "j" class in gffcompare; no abbreviation match	Ens99 gene ID import through exact transcript match from gffcompare and abbreviation match
chr5	30996257	31030843	+	LL0000001003	ankfy1	ankyrin repeat and FYVE domain containing 1	ENSDARG00000061013.8	568480	ZDB-GENE-041222-1	Entrez gene ID import through exact transcript match from gffcompare and abbreviation match	Ens99 gene ID import through exact transcript match from gffcompare and abbreviation match
chr24	10349147	10394291	-	LL0000001004	ankha	ANKH inorganic pyrophosphate transport regulator a	ENSDARG00000071724.6	571148	ZDB-GENE-050913-33	Entrez gene ID import through exact transcript match from gffcompare and abbreviation match	Ens99 gene ID import through exact transcript match from gffcompare and abbreviation match
chr2	31948352	32009716	+	LL0000001005	ankhb	ANKH inorganic pyrophosphate transport regulator b	ENSDARG00000014969.8	323738	ZDB-GENE-030131-2458	Entrez gene ID import through exact transcript match from gffcompare and abbreviation match	Ens99 gene ID import through exact transcript match from gffcompare and abbreviation match
chr21	26407562	26483562	-	LL0000001006	ankhd1	ankyrin repeat and KH domain containing 1	ENSDARG00000077860.6	563327	ZDB-GENE-090421-1	Entrez gene ID import through exact transcript match from gffcompare and abbreviation match	Ens99 gene ID import through exact transcript match from gffcompare and abbreviation match
chr19	43905634	43968721	+	LL0000001007	ankib1a	ankyrin repeat and IBR domain containing 1a	ENSDARG00000060768.8	566524	ZDB-GENE-060503-156	Entrez gene ID import through exact transcript match from gffcompare and abbreviation match	Ens99 gene ID import through exact transcript match from gffcompare and abbreviation match
chr16	16040396	16120970	-	LL0000001008	ankib1b	ankyrin repeat and IBR domain containing 1b	ENSDARG00000076829.5	561277	ZDB-GENE-100920-6	Entrez gene ID import through exact transcript match from gffcompare and abbreviation match	Ens99 gene ID import through exact transcript match from gffcompare and abbreviation match
chr15	22013941	22033837	+	LL0000001009	ankk1	ankyrin repeat and kinase domain containing 1	ENSDARG00000056921.4	100170831	ZDB-GENE-071015-4	Entrez gene ID import through exact transcript match from gffcompare and abbreviation match	Ens99 gene ID import through exact transcript match from gffcompare and abbreviation match
chr5	18939538	18962811	-	LL0000001010	ankle2	ankyrin repeat and LEM domain containing 2	ENSDARG00000035607.8	559297	ZDB-GENE-030131-6090	Entrez gene ID import through exact transcript match from gffcompare and abbreviation match	Ens99 gene ID import through exact transcript match from gffcompare and abbreviation match
chr22	15552020	15570181	-	LL0000001011	ankmy1	ankyrin repeat and MYND domain containing 1	ENSDARG00000062702.7	568987	ZDB-GENE-050208-740	Entrez gene ID import through exact transcript match from gffcompare and abbreviation match	Ens99 gene ID import through exact transcript match from gffcompare and abbreviation match
chr15	34569479	34590950	-	LL0000001012	ankmy2a	ankyrin repeat and MYND domain containing 2a	ENSDARG00000005948.8	334389	ZDB-GENE-030131-6321	Entrez gene ID import through exact transcript match from gffcompare and abbreviation match	Ens99 gene ID import through exact transcript match from gffcompare and abbreviation match
chr19	31043002	31054326	+	LL0000001013	ankmy2b	ankyrin repeat and MYND domain containing 2b	ENSDARG00000093668.3		ZDB-GENE-060503-558	No transcript match by gffcompare	Ens99 gene ID import through exact transcript match from gffcompare and abbreviation match
chr5	34981584	34987273	+	LL0000001014	ankra2	ankyrin repeat, family A (RFXANK-like), 2	ENSDARG00000035399.10	406403	ZDB-GENE-040426-2141	Entrez gene ID import through exact transcript match from gffcompare and abbreviation match	Ens99 gene ID import through exact transcript match from gffcompare and abbreviation match
chr1	29140884	29164911	+	LL0000001015	ankrd10a	ankyrin repeat domain 10a	ENSDARG00000037100.10	393955	ZDB-GENE-040426-700	Entrez gene ID import through exact transcript match from gffcompare and abbreviation match	Ens99 gene ID import through exact transcript match from gffcompare and abbreviation match
chr9	8929345	8967936	+	LL0000001016	ankrd10b	ankyrin repeat domain 10b	ENSDARG00000004771.11	559527	ZDB-GENE-061013-49	Entrez gene ID import through exact transcript match from gffcompare and abbreviation match	Ens99 gene ID import through exact transcript match from gffcompare and abbreviation match
chr7	56184866	56410090	+	LL0000001017	ankrd11	ankyrin repeat domain 11	ENSDARG00000051886.5	327352	ZDB-GENE-030131-3932	Entrez gene ID import through exact transcript match from gffcompare and abbreviation match	Ens99 gene ID import through exact transcript match from gffcompare and abbreviation match
chr2	54695988	54787646	+	LL0000001018	ankrd12	ankyrin repeat domain 12	ENSDARG00000052419.7	393119	ZDB-GENE-040426-846	Entrez gene ID import through exact transcript match from gffcompare and abbreviation match	Ens99 gene ID import through exact transcript match from gffcompare and abbreviation match
chr5	19932986	19961207	+	LL0000001019	ankrd13a	ankyrin repeat domain 13A	ENSDARG00000061901.7	556837	ZDB-GENE-030131-1833	Entrez gene ID import through exact transcript match from gffcompare and abbreviation match	Ens99 gene ID import through exact transcript match from gffcompare and abbreviation match
chr15	28482862	28540735	+	LL0000001020	ankrd13b	ankyrin repeat domain 13B	ENSDARG00000014652.10	568981	ZDB-GENE-050913-151	Entrez gene ID import through exact transcript match from gffcompare and abbreviation match	Ens99 gene ID import through exact transcript match from gffcompare and abbreviation match
chr11	45401608	45420426	-	LL0000001021	ankrd13c	ankyrin repeat domain 13C	ENSDARG00000103831.3	325167	ZDB-GENE-030131-3892	Entrez gene ID import through exact transcript match from gffcompare and abbreviation match	Ens99 gene ID import through exact transcript match from gffcompare and abbreviation match
chr14	21782619	21816706	+	LL0000001022	ankrd13d	ankyrin repeat domain 13 family, member D	ENSDARG00000098140.2	562931	ZDB-GENE-101007-3	Entrez gene ID import through exact transcript match from gffcompare and abbreviation match	Ens99 gene ID import through exact transcript match from gffcompare and abbreviation match
chr4	11458099	11462702	+	LL0000001023	ankrd16	ankyrin repeat domain 16	ENSDARG00000003822.8	550225	ZDB-GENE-041210-253	Entrez gene ID import through exact transcript match from gffcompare and abbreviation match	Ens99 gene ID import through exact transcript match from gffcompare and abbreviation match
chr17	23462570	23472265	+	LL0000001024	ankrd1a	ankyrin repeat domain 1a (cardiac muscle)	ENSDARG00000075263.4	100151027	ZDB-GENE-100405-1	Entrez gene ID import through exact transcript match from gffcompare and abbreviation match	Ens99 gene ID import through exact transcript match from gffcompare and abbreviation match
chr12	16440708	16446373	+	LL0000001025	ankrd1b	ankyrin repeat domain 1b (cardiac muscle)	ENSDARG00000076192.3	564159	ZDB-GENE-070820-13	Entrez gene ID import through exact transcript match from gffcompare and abbreviation match	Ens99 gene ID import through exact transcript match from gffcompare and abbreviation match
chr13	40728869	40741033	+	LL0000001026	ankrd2	ankyrin repeat domain 2 (stretch responsive muscle)	ENSDARG00000002722.9	101886079	ZDB-GENE-090313-383	Entrez gene ID import through exact transcript match from gffcompare and abbreviation match	Ens99 gene ID import through exact transcript match from gffcompare and abbreviation match
chr12	17154655	17158635	+	LL0000001027	ankrd22	ankyrin repeat domain 22	ENSDARG00000002298.5	393244	ZDB-GENE-040426-1120	Entrez gene ID import through exact transcript match from gffcompare and abbreviation match	Ens99 gene ID import through exact transcript match from gffcompare and abbreviation match
chr22	21359164	21393168	-	LL0000001028	ankrd24	ankyrin repeat domain 24	ENSDARG00000062103.7	565326	ZDB-GENE-050208-747	Entrez gene ID import through exact transcript match from gffcompare and abbreviation match	Ens99 gene ID import through exact transcript match from gffcompare and abbreviation match
chr25	36404130	36444513	-	LL0000001029	ankrd27	ankyrin repeat domain 27 (VPS9 domain)	ENSDARG00000089207.4	386887	ZDB-GENE-121105-1	Entrez gene ID import through exact transcript match from gffcompare and abbreviation match	Ens99 gene ID import through exact transcript match from gffcompare and abbreviation match
chr16	20055878	20154859	+	LL0000001030	ankrd28b	ankyrin repeat domain 28b	ENSDARG00000009023.10	560747	ZDB-GENE-070622-4	Entrez gene ID import through exact transcript match from gffcompare and abbreviation match	Ens99 gene ID import through exact transcript match from gffcompare and abbreviation match
chr22	16418688	16431139	+	LL0000001031	ankrd29	ankyrin repeat domain 29	ENSDARG00000057159.4	553798	ZDB-GENE-050208-655	Entrez gene ID import through exact transcript match from gffcompare and abbreviation match	Ens99 gene ID import through exact transcript match from gffcompare and abbreviation match
chr5	51001985	51011386	+	LL0000001032	ankrd31	ankyrin repeat domain 31	ENSDARG00000052731.5	550610	ZDB-GENE-050417-473	Entrez gene ID import through exact transcript match from gffcompare and abbreviation match	Ens99 gene ID import through exact transcript match from gffcompare and abbreviation match
chr23	27861150	27875263	-	LL0000001033	ankrd33aa	ankyrin repeat domain 33Aa	ENSDARG00000055638.7	557568	ZDB-GENE-080520-2	Entrez gene ID import through exact transcript match from gffcompare and abbreviation match	Ens99 gene ID import through exact transcript match from gffcompare and abbreviation match
chr6	39279104	39286029	+	LL0000001034	ankrd33ab	ankyrin repeat domain 33Ab	ENSDARG00000002508.9	569518	ZDB-GENE-100729-1	Entrez gene ID import through exact transcript match from gffcompare and abbreviation match	Ens99 gene ID import through exact transcript match from gffcompare and abbreviation match
chr24	22039416	22062819	+	LL0000001035	ankrd33ba	ankyrin repeat domain 33ba	ENSDARG00000058357.6	568270	ZDB-GENE-040724-39	Entrez gene ID import through exact transcript match from gffcompare and abbreviation match	Ens99 gene ID import through exact transcript match from gffcompare and abbreviation match
chr2	30530906	30550531	+	LL0000001036	ankrd33bb	ankyrin repeat domain 33Bb	ENSDARG00000015589.10	557905	ZDB-GENE-070912-531	Entrez gene ID import through exact transcript match from gffcompare and abbreviation match	Ens99 gene ID import through exact transcript match from gffcompare and abbreviation match
chr16	42795710	42820435	-	LL0000001037	ankrd34a	ankyrin repeat domain 34A		798097	ZDB-GENE-110316-3	Entrez gene ID import through exact transcript match from gffcompare and abbreviation match	no overlapping transcript based on gffcompare
chr10	3030921	3039937	-	LL0000001038	ankrd34ba	ankyrin repeat domain 34Ba	ENSDARG00000077086.5	560938	ZDB-GENE-091118-17	partial transcript match; "j" class in gffcompare; abbreviation match	Ens99 gene ID import through exact transcript match from gffcompare and abbreviation match
chr5	26148426	26160590	+	LL0000001039	ankrd34bb	ankyrin repeat domain 34Bb	ENSDARG00000061641.5	565548	ZDB-GENE-060526-101	Entrez gene ID import through exact transcript match from gffcompare and abbreviation match	Ens99 gene ID import through exact transcript match from gffcompare and abbreviation match
chr1	17695426	17699722	+	LL0000001040	ankrd37	ankyrin repeat domain 37	ENSDARG00000056376.6	793783	ZDB-GENE-070308-1	Entrez gene ID import through exact transcript match from gffcompare and abbreviation match	Ens99 gene ID import through exact transcript match from gffcompare and abbreviation match
chr8	51573116	51579286	-	LL0000001041	ankrd39	ankyrin repeat domain 39	ENSDARG00000041350.6	100000333	ZDB-GENE-081104-153	Entrez gene ID import through exact transcript match from gffcompare and abbreviation match	Ens99 gene ID import through exact transcript match from gffcompare and abbreviation match
chr3	18062871	18080924	+	LL0000001042	ankrd40	ankyrin repeat domain 40	ENSDARG00000076490.4	100005118	ZDB-GENE-120612-2	Entrez gene ID import through exact transcript match from gffcompare and abbreviation match	Ens99 gene ID import through exact transcript match from gffcompare and abbreviation match
chr9	32106327	32159867	-	LL0000001043	ankrd44	ankyrin repeat domain 44	ENSDARG00000026028.9	561373	ZDB-GENE-070912-605	Entrez gene ID import through exact transcript match from gffcompare and abbreviation match	Ens99 gene ID import through exact transcript match from gffcompare and abbreviation match
chr2	35615547	35731776	+	LL0000001044	ankrd45	ankyrin repeat domain 45	ENSDARG00000011326.10	553808	ZDB-GENE-050522-311	Entrez gene ID import through exact transcript match from gffcompare and abbreviation match	Ens99 gene ID import through exact transcript match from gffcompare and abbreviation match
chr21	43475746	43485483	-	LL0000001045	ankrd46a	ankyrin repeat domain 46a	ENSDARG00000044328.6	100329397	ZDB-GENE-030131-2643	Entrez gene ID import through exact transcript match from gffcompare and abbreviation match	Ens99 gene ID import through exact transcript match from gffcompare and abbreviation match
chr7	50910959	50917255	-	LL0000001046	ankrd46b	ankyrin repeat domain 46b	ENSDARG00000015780.11	402888	ZDB-GENE-050114-7	Entrez gene ID import through exact transcript match from gffcompare and abbreviation match	Ens99 gene ID import through exact transcript match from gffcompare and abbreviation match
chr15	2850965	2857961	-	LL0000001047	ankrd49	ankyrin repeat domain 49	ENSDARG00000023508.8	550246	ZDB-GENE-050417-46	Entrez gene ID import through exact transcript match from gffcompare and abbreviation match	Ens99 gene ID import through exact transcript match from gffcompare and abbreviation match
chr14	460644	474282	-	LL0000001048	ANKRD50	ankyrin repeat domain 50 [Source:HGNC Symbol;Acc:HGNC:29223]	ENSDARG00000045666.7			No transcript match by gffcompare	Ens99 gene ID import through exact transcript match from gffcompare and abbreviation match
chr9	32856744	32875624	+	LL0000001049	ankrd50l	ankyrin repeat domain 50-like	ENSDARG00000007077.8	449857	ZDB-GENE-041008-117	Ens99 gene ID import through exact transcript match from gffcompare; abbrev conflict matches ZFIN alias	Ens99 gene ID import through exact transcript match from gffcompare and abbreviation match
chr23	32353166	32390778	-	LL0000001050	ankrd52a	ankyrin repeat domain 52a	ENSDARG00000036826.6	553206	ZDB-GENE-050522-247	Entrez gene ID import through exact transcript match from gffcompare and abbreviation match	Ens99 gene ID import through exact transcript match from gffcompare and abbreviation match
chr11	2517171	2539746	-	LL0000001051	ankrd52b	ankyrin repeat domain 52b		564614	ZDB-GENE-121105-6	Entrez gene ID import through exact transcript match from gffcompare and abbreviation match	no overlapping transcript based on gffcompare
chr3	26035550	26044759	+	LL0000001052	ankrd54	ankyrin repeat domain 54	ENSDARG00000055743.5	436851	ZDB-GENE-040718-318	Entrez gene ID import through exact transcript match from gffcompare and abbreviation match	Ens99 gene ID import through exact transcript match from gffcompare and abbreviation match
chr10	5823759	5848182	-	LL0000001053	ankrd55	ankyrin repeat domain 55	ENSDARG00000099182.2	100006755	ZDB-GENE-080104-7	Entrez gene ID import through exact transcript match from gffcompare and abbreviation match	Ens99 gene ID import through exact transcript match from gffcompare and abbreviation match
chr17	2278479	2281041	-	LL0000001054	ankrd63	ankyrin repeat domain 63		101885975		partial transcript match; "j" class in gffcompare; abbreviation match	no overlapping transcript based on gffcompare
chr17	6553795	6600914	-	LL0000001055	ANKRD66	si:ch211-189e2.2 [Source:ZFIN;Acc:ZDB-GENE-131121-624]	ENSDARG00000090489.5	101886816	ZDB-GENE-131121-624	geneAbbrevConflict; gffcompare transcript match; overlap gene coordinates >90%	Ens99 gene ID import through exact transcript match from gffcompare and abbreviation match
chr17	15755779	15778042	-	LL0000001056	ankrd6a	ankyrin repeat domain 6a	ENSDARG00000057790.7	100330565	ZDB-GENE-120525-1	Entrez gene ID import through exact transcript match from gffcompare and abbreviation match	Ens99 gene ID import through exact transcript match from gffcompare and abbreviation match
chr20	1201567	1239701	-	LL0000001057	ankrd6b	ankyrin repeat domain 6b	ENSDARG00000029370.8	378477	ZDB-GENE-030916-4	Entrez gene ID import through exact transcript match from gffcompare and abbreviation match	Ens99 gene ID import through exact transcript match from gffcompare and abbreviation match
chr17	29276544	29277731	+	LL0000001058	ankrd9	ankyrin repeat domain 9	ENSDARG00000028804.6	492328	ZDB-GENE-041114-3	Entrez gene ID import through exact transcript match from gffcompare and abbreviation match	Ens99 gene ID import through exact transcript match from gffcompare and abbreviation match
chr23	254994	307028	-	LL0000001059	anks1aa	ankyrin repeat and sterile alpha motif domain containing 1Aa	ENSDARG00000062396.8	100334911	ZDB-GENE-090312-152	geneAbbrevConflict; gffcompare transcript match; overlap gene coordinates >50%	Ens99 gene ID import through exact transcript match from gffcompare and abbreviation match
chr6	54358499	54427331	+	LL0000001060	anks1ab	ankyrin repeat and sterile alpha motif domain containing 1Ab	ENSDARG00000078901.6	100003659	ZDB-GENE-110107-1	Entrez gene ID import through exact transcript match from gffcompare and abbreviation match	Ens99 gene ID import through exact transcript match from gffcompare and abbreviation match
chr4	17886291	18202291	-	LL0000001061	anks1b	ankyrin repeat and sterile alpha motif domain containing 1B	ENSDARG00000003512.10	565408	ZDB-GENE-041210-349	Entrez gene ID import through exact transcript match from gffcompare and abbreviation match	Ens99 gene ID import through exact transcript match from gffcompare and abbreviation match
chr24	37661140	37680917	-	LL0000001062	anks3	ankyrin repeat and sterile alpha motif domain containing 3	ENSDARG00000038557.8	100136846	ZDB-GENE-080204-51	Entrez gene ID import through exact transcript match from gffcompare and abbreviation match	Ens99 gene ID import through exact transcript match from gffcompare and abbreviation match
chr3	60809397	60827402	-	LL0000001063	anks4b	ankyrin repeat and sterile alpha motif domain containing 4B	ENSDARG00000036846.4	431735	ZDB-GENE-040704-29	Entrez gene ID import through exact transcript match from gffcompare and abbreviation match	Ens99 gene ID import through exact transcript match from gffcompare and abbreviation match
chrUn_KN150037v1	2361	2649	+	LL0000001064	anks6	ankyrin repeat and sterile alpha motif domain containing 6		449657	ZDB-GENE-041010-213	Entrez gene ID import through exact transcript match from gffcompare and abbreviation match	no overlapping transcript based on gffcompare
chr9	12834414	12886108	-	LL0000001065	ankzf1	ankyrin repeat and zinc finger peptidyl tRNA hydrolase 1	ENSDARG00000041904.9	553307	ZDB-GENE-050309-80	Entrez gene ID import through exact transcript match from gffcompare and abbreviation match	Ens99 gene ID import through exact transcript match from gffcompare and abbreviation match
chr19	35433155	35450857	-	LL0000001066	anln	anillin, actin binding protein	ENSDARG00000060917.8	562517	ZDB-GENE-030131-4486	Entrez gene ID import through exact transcript match from gffcompare and abbreviation match	Ens99 gene ID import through exact transcript match from gffcompare and abbreviation match
chr7	54322648	54440040	-	LL0000001067	ano1	anoctamin 1, calcium activated chloride channel [Source:ZFIN;Acc:ZDB-GENE-121127-3]	ENSDARG00000102335.2	407698	ZDB-GENE-121127-3	Entrez gene ID import through exact transcript match from gffcompare and abbreviation match	Ens99 gene ID import through exact transcript match from gffcompare and abbreviation match
chr16	7985563	8041442	+	LL0000001068	ano10a	anoctamin 10a	ENSDARG00000057736.7	566425	ZDB-GENE-050913-43	Entrez gene ID import through exact transcript match from gffcompare and abbreviation match	Ens99 gene ID import through exact transcript match from gffcompare and abbreviation match
chr25	13528257	13558212	-	LL0000001069	ano10b	anoctamin 10b	ENSDARG00000018159.9	565195	ZDB-GENE-061013-169	Entrez gene ID import through exact transcript match from gffcompare and abbreviation match	Ens99 gene ID import through exact transcript match from gffcompare and abbreviation match
chr23	24170671	24195723	-	LL0000001070	ano11	anoctamin 11	ENSDARG00000077327.5	100007289	ZDB-GENE-090313-245	Entrez gene ID import through exact transcript match from gffcompare and abbreviation match	Ens99 gene ID import through exact transcript match from gffcompare and abbreviation match
chr4	4267427	4358940	+	LL0000001071	ano2	anoctamin 2 [Source:ZFIN;Acc:ZDB-GENE-060503-62]	ENSDARG00000101363.2	566373	ZDB-GENE-060503-62	Entrez gene ID import through exact transcript match from gffcompare and abbreviation match	geneAbbrev conflict with Ens99 but matches ZFIN alias
chr18	7283283	7304547	+	LL0000001072	ANO2 (1 of many)	si:ch73-86n2.1 [Source:ZFIN;Acc:ZDB-GENE-091204-400]	ENSDARG00000003210.10		ZDB-GENE-091204-400		geneAbbrevConflict; gffcompare transcript match; overlap gene coordinates >90%
chr25	35375618	35475389	+	LL0000001073	ano3	anoctamin 3	ENSDARG00000058015.8	553392	ZDB-GENE-111031-3	Entrez gene ID import through exact transcript match from gffcompare and abbreviation match	Ens99 gene ID import through exact transcript match from gffcompare and abbreviation match
chr25	35189555	35248861	+	LL0000001074	ano5a	anoctamin 5a	ENSDARG00000015731.10	100534737	ZDB-GENE-091013-2	Entrez gene ID import through exact transcript match from gffcompare and abbreviation match	Ens99 gene ID import through exact transcript match from gffcompare and abbreviation match
chr7	32834142	32895695	-	LL0000001075	ano5b	anoctamin 5b	ENSDARG00000036147.9	560102	ZDB-GENE-061215-108	Entrez gene ID import through exact transcript match from gffcompare and abbreviation match	Ens99 gene ID import through exact transcript match from gffcompare and abbreviation match
chr4	1877078	1914618	-	LL0000001076	ano6	anoctamin 6	ENSDARG00000061544.8	100535437	ZDB-GENE-081104-64	Entrez gene ID import through exact transcript match from gffcompare and abbreviation match	Ens99 gene ID import through exact transcript match from gffcompare and abbreviation match
chr15	4126697	4160791	-	LL0000001077	ANO7	si:dkey-83h2.5 [Source:ZFIN;Acc:ZDB-GENE-131125-81]	ENSDARG00000104834.2	556876	ZDB-GENE-131125-81	geneAbbrevConflict; gffcompare transcript match; overlap gene coordinates >90%	Ens99 gene ID import by transcript match; but abbreviation conflict and limited gene overlap; may be complex gene structure or incorrect Ensembl assignment
chr2	24321150	24348972	-	LL0000001078	ano8a	anoctamin 8a	ENSDARG00000076265.5	562947	ZDB-GENE-070912-583	Entrez gene ID import through exact transcript match from gffcompare and abbreviation match	Ens99 gene ID import through exact transcript match from gffcompare and abbreviation match
chr11	5955296	6001857	-	LL0000001079	ano8b	anoctamin 8b	ENSDARG00000077229.4	562782	ZDB-GENE-121024-1	Entrez gene ID import through exact transcript match from gffcompare and abbreviation match	Ens99 gene ID import through exact transcript match from gffcompare and abbreviation match
chr25	35155618	35182347	-	LL0000001080	ano9a	anoctamin 9a	ENSDARG00000078941.4	100126106	ZDB-GENE-071004-46	Entrez gene ID import through exact transcript match from gffcompare and abbreviation match	Ens99 gene ID import through exact transcript match from gffcompare and abbreviation match
chr7	32901658	32924520	+	LL0000001081	ano9b	anoctamin 9b	ENSDARG00000079324.5	559809	ZDB-GENE-121106-2	Entrez gene ID import through exact transcript match from gffcompare and abbreviation match	Ens99 gene ID import through exact transcript match from gffcompare and abbreviation match
chr1	31942961	31979510	+	LL0000001082	anos1a	anosmin 1a	ENSDARG00000012896.10	30630	ZDB-GENE-000201-9	Entrez gene ID import through exact transcript match from gffcompare and abbreviation match	Ens99 gene ID import through exact transcript match from gffcompare and abbreviation match
chr22	38824012	38913871	+	LL0000001083	anos1b	anosmin 1b	ENSDARG00000004932.11	30652	ZDB-GENE-000201-13	Entrez gene ID import through exact transcript match from gffcompare and abbreviation match	Ens99 gene ID import through exact transcript match from gffcompare and abbreviation match
chr7	33345624	33351532	-	LL0000001084	anp32a	acidic (leucine-rich) nuclear phosphoprotein 32 family, member A	ENSDARG00000006487.9	335907	ZDB-GENE-030131-7850	Entrez gene ID import through exact transcript match from gffcompare and abbreviation match	Ens99 gene ID import through exact transcript match from gffcompare and abbreviation match
chr1	26660356	26666083	-	LL0000001085	anp32b	acidic (leucine-rich) nuclear phosphoprotein 32 family, member B	ENSDARG00000023330.10	322000	ZDB-GENE-030131-719	Entrez gene ID import through exact transcript match from gffcompare and abbreviation match	Ens99 gene ID import through exact transcript match from gffcompare and abbreviation match
chr19	42328423	42341815	+	LL0000001086	anp32e	acidic (leucine-rich) nuclear phosphoprotein 32 family, member E	ENSDARG00000054804.7	406562	ZDB-GENE-040426-2448	Entrez gene ID import through exact transcript match from gffcompare and abbreviation match	Ens99 gene ID import through exact transcript match from gffcompare and abbreviation match
chr25	10830208	10841591	+	LL0000001087	ANPEP	si:ch211-147g22.5 [Source:ZFIN;Acc:ZDB-GENE-131127-23]	ENSDARG00000097285.3	100004744	ZDB-GENE-131127-23	geneAbbrevConflict; gffcompare transcript match; overlap gene coordinates >90%	Ens99 gene ID import through exact transcript match from gffcompare and abbreviation match
chr18	21077528	21097751	-	LL0000001088	anpepa	alanyl (membrane) aminopeptidase a	ENSDARG00000041083.8	558452	ZDB-GENE-030131-4781	Entrez gene ID import through exact transcript match from gffcompare and abbreviation match	Ens99 gene ID import through exact transcript match from gffcompare and abbreviation match
chr25	10811551	10827771	+	LL0000001089	anpepb	alanyl (membrane) aminopeptidase b	ENSDARG00000103878.2	322533	ZDB-GENE-030131-1253	Entrez gene ID import through exact transcript match from gffcompare and abbreviation match	Ens99 gene ID import through exact transcript match from gffcompare and abbreviation match
chr8	50049079	50133064	-	LL0000001090	antxr1a	ANTXR cell adhesion molecule 1a	ENSDARG00000025672.9	793153	ZDB-GENE-110411-15	Entrez gene ID import through exact transcript match from gffcompare and abbreviation match	Ens99 gene ID import through exact transcript match from gffcompare and abbreviation match
chr10	40973524	41050557	+	LL0000001091	antxr1b	ANTXR cell adhesion molecule 1b	ENSDARG00000074075.6	556289	ZDB-GENE-091204-21	Entrez gene ID import through exact transcript match from gffcompare and abbreviation match	Ens99 gene ID import through exact transcript match from gffcompare and abbreviation match
chr12	2676878	2744798	+	LL0000001092	antxr1c	ANTXR cell adhesion molecule 1c	ENSDARG00000063612.6	563907	ZDB-GENE-090514-5	Entrez gene ID import through exact transcript match from gffcompare and abbreviation match	Ens99 gene ID import through exact transcript match from gffcompare and abbreviation match
chr13	31296908	31335937	+	LL0000001093	antxr1d	ANTXR cell adhesion molecule 1d	ENSDARG00000060845.7	563132	ZDB-GENE-090313-28	Entrez gene ID import through exact transcript match from gffcompare and abbreviation match	Ens99 gene ID import through exact transcript match from gffcompare and abbreviation match
chr5	39386225	39474235	-	LL0000001094	antxr2a	ANTXR cell adhesion molecule 2a	ENSDARG00000104118.2	557239	ZDB-GENE-060526-14	Entrez gene ID import through exact transcript match from gffcompare and abbreviation match	Ens99 gene ID import through exact transcript match from gffcompare and abbreviation match
chr10	9195154	9220135	+	LL0000001095	antxr2b	ANTXR cell adhesion molecule 2b	ENSDARG00000063011.6	560841	ZDB-GENE-080213-4	Entrez gene ID import through exact transcript match from gffcompare and abbreviation match	Ens99 gene ID import through exact transcript match from gffcompare and abbreviation match
chr5	64994083	65004791	-	LL0000001096	ANXA1 (1 of many)	zgc:110283 [Source:ZFIN;Acc:ZDB-GENE-050417-72]	ENSDARG00000098481.3	550268	ZDB-GENE-050417-72	geneAbbrevConflict; gffcompare transcript match; overlap gene coordinates >90%	geneAbbrevConflict; gffcompare transcript match; overlap gene coordinates >90%
chr13	16279890	16326598	+	LL0000001097	anxa11a	annexin A11a	ENSDARG00000077383.5	368215	ZDB-GENE-030707-4	Entrez gene ID import through exact transcript match from gffcompare and abbreviation match	Ens99 gene ID import through exact transcript match from gffcompare and abbreviation match
chr12	48815988	48837308	+	LL0000001098	anxa11b	annexin A11b	ENSDARG00000002632.12	353365	ZDB-GENE-030707-5	Entrez gene ID import through exact transcript match from gffcompare and abbreviation match	Ens99 gene ID import through exact transcript match from gffcompare and abbreviation match
chr24	6360423	6379275	-	LL0000001099	anxa13	annexin A13	ENSDARG00000013976.8	81880	ZDB-GENE-010406-1	Entrez gene ID import through exact transcript match from gffcompare and abbreviation match	Ens99 gene ID import through exact transcript match from gffcompare and abbreviation match
chr2	9821443	9842293	+	LL0000001100	anxa13l	annexin A13, like	ENSDARG00000013613.12	554118	ZDB-GENE-050522-310	Entrez gene ID import through exact transcript match from gffcompare and abbreviation match	Ens99 gene ID import through exact transcript match from gffcompare and abbreviation match
chr5	25578181	25585574	-	LL0000001101	anxa1a	annexin A1a	ENSDARG00000026726.9	334724	ZDB-GENE-030131-6664	Entrez gene ID import through exact transcript match from gffcompare and abbreviation match	Ens99 gene ID import through exact transcript match from gffcompare and abbreviation match
chr5	65022287	65037525	-	LL0000001102	anxa1b	annexin A1b	ENSDARG00000100095.3	353358	ZDB-GENE-030131-6554	Entrez gene ID import through exact transcript match from gffcompare and abbreviation match	Ens99 gene ID import through exact transcript match from gffcompare and abbreviation match
chr5	65009764	65021783	-	LL0000001103	anxa1c	annexin A1c	ENSDARG00000104359.2	494158	ZDB-GENE-030131-5274	Entrez gene ID import through exact transcript match from gffcompare and abbreviation match	Ens99 gene ID import through exact transcript match from gffcompare and abbreviation match
chr25	34013093	34027440	+	LL0000001104	anxa2a	annexin A2a	ENSDARG00000003216.7	325557	ZDB-GENE-030131-4282	Entrez gene ID import through exact transcript match from gffcompare and abbreviation match	Ens99 gene ID import through exact transcript match from gffcompare and abbreviation match
chr7	29518396	29534001	-	LL0000001105	anxa2b	annexin A2b	ENSDARG00000053625.8	799806	ZDB-GENE-030131-1089	Entrez gene ID import through exact transcript match from gffcompare and abbreviation match	Ens99 gene ID import through exact transcript match from gffcompare and abbreviation match
chr5	39087364	39095623	+	LL0000001106	anxa3a	annexin A3a	ENSDARG00000009196.9	447893	ZDB-GENE-040912-58	Entrez gene ID import through exact transcript match from gffcompare and abbreviation match	Ens99 gene ID import through exact transcript match from gffcompare and abbreviation match
chr10	9247593	9272281	-	LL0000001107	anxa3b	annexin A3b	ENSDARG00000044254.9	492336	ZDB-GENE-041114-128	Entrez gene ID import through exact transcript match from gffcompare and abbreviation match	Ens99 gene ID import through exact transcript match from gffcompare and abbreviation match
chr10	41159241	41192881	+	LL0000001108	anxa4	annexin A4	ENSDARG00000036456.7	353362	ZDB-GENE-030707-1	Entrez gene ID import through exact transcript match from gffcompare and abbreviation match	Ens99 gene ID import through exact transcript match from gffcompare and abbreviation match
chr14	46410766	46434196	+	LL0000001109	anxa5a	annexin A5a	ENSDARG00000026406.8	557578	ZDB-GENE-080220-29	Entrez gene ID import through exact transcript match from gffcompare and abbreviation match	Ens99 gene ID import through exact transcript match from gffcompare and abbreviation match
chr1	22654875	22665126	+	LL0000001110	anxa5b	annexin A5b	ENSDARG00000016470.9	337132	ZDB-GENE-030131-9076	Entrez gene ID import through exact transcript match from gffcompare and abbreviation match	Ens99 gene ID import through exact transcript match from gffcompare and abbreviation match
chr14	49251331	49360686	+	LL0000001111	anxa6	annexin A6	ENSDARG00000013335.10	353363	ZDB-GENE-030707-3	partial transcript match; "j" class in gffcompare; abbreviation match	Ens99 gene ID import through exact transcript match from gffcompare and abbreviation match
chr24	40001261	40009452	-	LL0000001112	aoc1	amine oxidase copper containing 1	ENSDARG00000061355.5	555401	ZDB-GENE-061103-112	Entrez gene ID import through exact transcript match from gffcompare and abbreviation match	Ens99 gene ID import through exact transcript match from gffcompare and abbreviation match
chr3	32924185	32934359	-	LL0000001113	aoc2	amine oxidase copper containing 2	ENSDARG00000014646.10	541429	ZDB-GENE-050320-133	Entrez gene ID import through exact transcript match from gffcompare and abbreviation match	Ens99 gene ID import through exact transcript match from gffcompare and abbreviation match
chr22	14083703	14115361	-	LL0000001114	aox5	aldehyde oxidase 5	ENSDARG00000071475.6	64265	ZDB-GENE-001205-2	Entrez gene ID import through exact transcript match from gffcompare and abbreviation match	Ens99 gene ID import through exact transcript match from gffcompare and abbreviation match
chr22	14051245	14084024	+	LL0000001115	aox6	aldehyde oxidase 6	ENSDARG00000020054.13	570457	ZDB-GENE-050208-742	Entrez gene ID import through exact transcript match from gffcompare and abbreviation match	Ens99 gene ID import through exact transcript match from gffcompare and abbreviation match
chr14	4796168	4814764	+	LL0000001116	ap1ar	adaptor related protein complex 1 associated regulatory protein	ENSDARG00000031496.8	100332265	ZDB-GENE-130530-580	Entrez gene ID import through exact transcript match from gffcompare and abbreviation match	Ens99 gene ID import through exact transcript match from gffcompare and abbreviation match
chr5	24756494	24812899	-	LL0000001117	ap1b1	adaptor related protein complex 1 subunit beta 1	ENSDARG00000020621.10	562166	ZDB-GENE-061025-1	Entrez gene ID import through exact transcript match from gffcompare and abbreviation match	Ens99 gene ID import through exact transcript match from gffcompare and abbreviation match
chr7	69304469	69352534	-	LL0000001118	ap1g1	adaptor related protein complex 1 subunit gamma 1	ENSDARG00000102394.3	324466	ZDB-GENE-030131-3187	Entrez gene ID import through exact transcript match from gffcompare and abbreviation match	Ens99 gene ID import through exact transcript match from gffcompare and abbreviation match
chr2	38287358	38312757	-	LL0000001119	ap1g2	adaptor related protein complex 1 subunit gamma 2	ENSDARG00000054337.6	100007877	ZDB-GENE-030616-587	Entrez gene ID import through exact transcript match from gffcompare and abbreviation match	Ens99 gene ID import through exact transcript match from gffcompare and abbreviation match
chr2	55414321	55492315	+	LL0000001120	ap1m1	adaptor related protein complex 1 subunit mu 1	ENSDARG00000096249.4	100330411	ZDB-GENE-110126-1	Entrez gene ID import through exact transcript match from gffcompare and abbreviation match	Ens99 gene ID import through exact transcript match from gffcompare and abbreviation match
chr6	112579	121799	+	LL0000001121	ap1m2	adaptor related protein complex 1 subunit mu 2	ENSDARG00000096454.3	403021	ZDB-GENE-041114-20	Entrez gene ID import through exact transcript match from gffcompare and abbreviation match	Ens99 gene ID import through exact transcript match from gffcompare and abbreviation match
chr6	34038895	34075664	+	LL0000001122	ap1m3	adaptor related protein complex 1 subunit mu 3	ENSDARG00000039512.8	445244	ZDB-GENE-040801-159	Entrez gene ID import through exact transcript match from gffcompare and abbreviation match	Ens99 gene ID import through exact transcript match from gffcompare and abbreviation match
chr7	26245061	26263206	-	LL0000001123	ap1s1	adaptor related protein complex 1 subunit sigma 1	ENSDARG00000056803.8	393279	ZDB-GENE-040426-1119	Entrez gene ID import through exact transcript match from gffcompare and abbreviation match	Ens99 gene ID import through exact transcript match from gffcompare and abbreviation match
chr11	12719944	12728353	+	LL0000001124	ap1s2	adaptor related protein complex 1 subunit sigma 2	ENSDARG00000058504.8	327237	ZDB-GENE-030131-5448	Entrez gene ID import through exact transcript match from gffcompare and abbreviation match	Ens99 gene ID import through exact transcript match from gffcompare and abbreviation match
chr15	43153941	43176335	-	LL0000001125	ap1s3a	adaptor related protein complex 1 subunit sigma 3a	ENSDARG00000110439.1	550415	ZDB-GENE-050417-222	Entrez gene ID import through exact transcript match from gffcompare and abbreviation match	Ens99 gene ID import through exact transcript match from gffcompare and abbreviation match
chr2	47587238	47620806	-	LL0000001126	ap1s3b	adaptor related protein complex 1 subunit sigma 3b	ENSDARG00000027966.8	447897	ZDB-GENE-040912-62	Entrez gene ID import through exact transcript match from gffcompare and abbreviation match	Ens99 gene ID import through exact transcript match from gffcompare and abbreviation match
chr3	32365759	32401481	+	LL0000001127	ap2a1	adaptor related protein complex 2 subunit alpha 1	ENSDARG00000054320.8	558153	ZDB-GENE-090302-2	Entrez gene ID import through exact transcript match from gffcompare and abbreviation match	Ens99 gene ID import through exact transcript match from gffcompare and abbreviation match
chr5	61657010	61724086	+	LL0000001128	ap2b1	adaptor related protein complex 2 subunit beta 1	ENSDARG00000035152.8	334632	ZDB-GENE-030131-6564	Entrez gene ID import through exact transcript match from gffcompare and abbreviation match	Ens99 gene ID import through exact transcript match from gffcompare and abbreviation match
chr2	9789811	9818711	-	LL0000001129	ap2m1a	adaptor related protein complex 2 subunit mu 1a	ENSDARG00000002790.9	321051	ZDB-GENE-030131-9784	Entrez gene ID import through exact transcript match from gffcompare and abbreviation match	Ens99 gene ID import through exact transcript match from gffcompare and abbreviation match
chr18	45954991	45984589	+	LL0000001130	ap2m1b	adaptor related protein complex 2 subunit mu 1b	ENSDARG00000033899.8	394001	ZDB-GENE-040426-1103	Entrez gene ID import through exact transcript match from gffcompare and abbreviation match	Ens99 gene ID import through exact transcript match from gffcompare and abbreviation match
chr15	8767650	8799977	+	LL0000001131	ap2s1	adaptor related protein complex 2 subunit sigma 1	ENSDARG00000026967.8	100148085	ZDB-GENE-040426-2174	Entrez gene ID import through exact transcript match from gffcompare and abbreviation match	Ens99 gene ID import through exact transcript match from gffcompare and abbreviation match
chr21	7332963	7402952	-	LL0000001132	ap3b1a	adaptor related protein complex 3 subunit beta 1a	ENSDARG00000100082.3	563316	ZDB-GENE-031112-8	partial transcript overlap; "j" class in gffcompare; no abbreviation match	Ens99 gene ID import through exact transcript match from gffcompare and abbreviation match
chr25	5697898	5740379	-	LL0000001133	AP3B2	adaptor related protein complex 3 beta 2 subunit [Source:NCBI gene;Acc:100000165]	ENSDARG00000105296.3	100000165		Ens99 gene ID import through exact transcript match from gffcompare; abbrev conflict matches ZFIN alias	Ens99 gene ID import through exact transcript match from gffcompare and abbreviation match
chr22	22171343	22231882	-	LL0000001134	ap3d1	adaptor related protein complex 3 subunit delta 1	ENSDARG00000071424.6	563359	ZDB-GENE-050208-437	Entrez gene ID import through exact transcript match from gffcompare and abbreviation match	Ens99 gene ID import through exact transcript match from gffcompare and abbreviation match
chr13	25199849	25209083	+	LL0000001135	ap3m1	adaptor related protein complex 3 subunit mu 1	ENSDARG00000029928.9	266798	ZDB-GENE-021015-2	Entrez gene ID import through exact transcript match from gffcompare and abbreviation match	Ens99 gene ID import through exact transcript match from gffcompare and abbreviation match
chr5	14375108	14390494	-	LL0000001136	ap3m2	adaptor related protein complex 3 subunit mu 2	ENSDARG00000016128.8	415244	ZDB-GENE-021022-2	Entrez gene ID import through exact transcript match from gffcompare and abbreviation match	Ens99 gene ID import through exact transcript match from gffcompare and abbreviation match
chrUn_KN149707v2	2	2261	-	LL0000039760	ap3s1	adaptor related protein complex 3 subunit sigma 1		449791	ZDB-GENE-041010-38	Entrez gene ID import through exact transcript match from gffcompare and abbreviation match	no overlapping transcript based on gffcompare	5' half of ap3s1	initially was multimapped;ie transcripts from two loci mapped to single gene ID
chrUn_KN150103v1	1134	1685	-	LL0000039761	ap3s1	adaptor related protein complex 3 subunit sigma 1		449791	ZDB-GENE-041010-38	exact transcript match; abbrev conflict, less than 50% gene coordinate overlap	no overlapping transcript based on gffcompare	3' end of ap3s1	initially was multimapped;ie transcripts from two loci mapped to single gene ID
chr25	10762016	10803532	+	LL0000001138	ap3s2	adaptor related protein complex 3 subunit sigma 2	ENSDARG00000039882.7	436812	ZDB-GENE-040718-274	Entrez gene ID import through exact transcript match from gffcompare and abbreviation match	Ens99 gene ID import through exact transcript match from gffcompare and abbreviation match
chr23	354369	368501	+	LL0000001139	ap4b1	adaptor related protein complex 4 subunit beta 1	ENSDARG00000013726.9	393309	ZDB-GENE-040426-1284	Entrez gene ID import through exact transcript match from gffcompare and abbreviation match	Ens99 gene ID import through exact transcript match from gffcompare and abbreviation match
chr25	4855549	4886017	+	LL0000001140	ap4e1	adaptor related protein complex 4 subunit epsilon 1	ENSDARG00000103684.2	570467	ZDB-GENE-061221-3	Entrez gene ID import through exact transcript match from gffcompare and abbreviation match	Ens99 gene ID import through exact transcript match from gffcompare and abbreviation match
chr10	22854779	22862078	+	LL0000001141	ap4m1	adaptor related protein complex 4 subunit mu 1	ENSDARG00000056871.6	436945	ZDB-GENE-040718-421	Entrez gene ID import through exact transcript match from gffcompare and abbreviation match	Ens99 gene ID import through exact transcript match from gffcompare and abbreviation match
chr17	28703971	28707970	-	LL0000001142	ap4s1	adaptor related protein complex 4 subunit sigma 1	ENSDARG00000054220.8	368852	ZDB-GENE-030616-404	Entrez gene ID import through exact transcript match from gffcompare and abbreviation match	Ens99 gene ID import through exact transcript match from gffcompare and abbreviation match
chr11	39112341	39118929	-	LL0000001143	ap5b1	adaptor related protein complex 5 subunit beta 1	ENSDARG00000078805.5	100148772	ZDB-GENE-131121-204	Entrez gene ID import through exact transcript match from gffcompare and abbreviation match	Ens99 gene ID import through exact transcript match from gffcompare and abbreviation match
chr17	44441037	44454022	+	LL0000001144	ap5m1	adaptor related protein complex 5 subunit mu 1	ENSDARG00000031533.10	553681	ZDB-GENE-050522-231	Entrez gene ID import through exact transcript match from gffcompare and abbreviation match	Ens99 gene ID import through exact transcript match from gffcompare and abbreviation match
chr13	14902318	14908999	-	LL0000001145	ap5s1	adaptor related protein complex 5 subunit sigma 1	ENSDARG00000076755.5	556111	ZDB-GENE-090313-184	Entrez gene ID import through exact transcript match from gffcompare and abbreviation match	Ens99 gene ID import through exact transcript match from gffcompare and abbreviation match
chr3	40876306	40897030	-	LL0000001146	ap5z1	adaptor related protein complex 5 subunit zeta 1	ENSDARG00000078111.5	100537934	ZDB-GENE-120508-2	Entrez gene ID import through exact transcript match from gffcompare and abbreviation match	Ens99 gene ID import through exact transcript match from gffcompare and abbreviation match
chr4	17830759	17874154	+	LL0000001147	apaf1	apoptotic peptidase activating factor 1	ENSDARG00000021239.10	58131	ZDB-GENE-000616-4	partial transcript match; "j" class in gffcompare; abbreviation match	Ens99 gene ID import through exact transcript match from gffcompare and abbreviation match
chr5	52625975	52736088	+	LL0000001148	apba1a	amyloid beta (A4) precursor protein-binding, family A, member 1a	ENSDARG00000103848.3	100003938	ZDB-GENE-060526-175	Entrez gene ID import through exact transcript match from gffcompare and abbreviation match	Ens99 gene ID import through exact transcript match from gffcompare and abbreviation match
chr10	15777064	15813279	+	LL0000001149	apba1b	amyloid beta (A4) precursor protein-binding, family A, member 1b	ENSDARG00000074328.5	565507	ZDB-GENE-070925-3	Entrez gene ID import through exact transcript match from gffcompare and abbreviation match	Ens99 gene ID import through exact transcript match from gffcompare and abbreviation match
chr25	31912153	31943748	+	LL0000001150	apba2a	amyloid beta (A4) precursor protein-binding, family A, member 2a	ENSDARG00000063314.7	100330365	ZDB-GENE-121107-1	Entrez gene ID import through exact transcript match from gffcompare and abbreviation match	Ens99 gene ID import through exact transcript match from gffcompare and abbreviation match
chr7	30787893	30915965	+	LL0000001151	apba2b	amyloid beta (A4) precursor protein-binding, family A, member 2b	ENSDARG00000060639.7	327160	ZDB-GENE-030131-5371	Entrez gene ID import through exact transcript match from gffcompare and abbreviation match	Ens99 gene ID import through exact transcript match from gffcompare and abbreviation match
chr11	5565082	5588152	+	LL0000001152	APBA3	si:ch73-40i7.5 [Source:ZFIN;Acc:ZDB-GENE-041008-110]	ENSDARG00000090675.3	449850	ZDB-GENE-041008-110	geneAbbrevConflict; gffcompare transcript match; overlap gene coordinates >50%	Ens99 gene ID import through exact transcript match from gffcompare and abbreviation match
chr10	15967341	16005358	+	LL0000001153	apbb1	amyloid beta (A4) precursor protein-binding, family B, member 1 (Fe65)	ENSDARG00000076560.5	565164	ZDB-GENE-091118-127	Entrez gene ID import through exact transcript match from gffcompare and abbreviation match	Ens99 gene ID import through exact transcript match from gffcompare and abbreviation match
chr24	6039452	6078382	-	LL0000001154	apbb1ip	amyloid beta (A4) precursor protein-binding, family B, member 1 interacting protein	ENSDARG00000016505.11	393607	ZDB-GENE-040426-1318	Entrez gene ID import through exact transcript match from gffcompare and abbreviation match	Ens99 gene ID import through exact transcript match from gffcompare and abbreviation match
chr1	19896260	19995056	+	LL0000001155	apbb2b	amyloid beta (A4) precursor protein-binding, family B, member 2b	ENSDARG00000099995.2	564990	ZDB-GENE-090313-73	Entrez gene ID import through exact transcript match from gffcompare and abbreviation match	Ens99 gene ID import through exact transcript match from gffcompare and abbreviation match
chr21	40730432	40783121	-	LL0000001156	apbb3	amyloid beta (A4) precursor protein-binding, family B, member 3	ENSDARG00000053771.6	101883158	ZDB-GENE-140106-53	Entrez gene ID import through exact transcript match from gffcompare and abbreviation match	Ens99 gene ID import through exact transcript match from gffcompare and abbreviation match
chr10	1829489	1893095	+	LL0000001157	apc	APC regulator of WNT signaling pathway	ENSDARG00000058868.7	386762	ZDB-GENE-031112-7	Entrez gene ID import through exact transcript match from gffcompare and abbreviation match	Ens99 gene ID import through exact transcript match from gffcompare and abbreviation match
chr11	7280310	7320211	-	LL0000001158	apc2	APC regulator of WNT signaling pathway 2	ENSDARG00000063007.7	565771	ZDB-GENE-090422-1	Entrez gene ID import through exact transcript match from gffcompare and abbreviation match	Ens99 gene ID import through exact transcript match from gffcompare and abbreviation match
chr6	49650170	49673476	-	LL0000001159	apcdd1l	adenomatosis polyposis coli down-regulated 1-like	ENSDARG00000075557.4	100001408	ZDB-GENE-121022-3	Entrez gene ID import through exact transcript match from gffcompare and abbreviation match	Ens99 gene ID import through exact transcript match from gffcompare and abbreviation match
chr8	53746805	53773591	-	LL0000001160	apeh	acylaminoacyl-peptide hydrolase	ENSDARG00000008703.9	100333019	ZDB-GENE-030131-9870	Entrez gene ID import through exact transcript match from gffcompare and abbreviation match	Ens99 gene ID import through exact transcript match from gffcompare and abbreviation match
chr1	19667947	19686322	-	LL0000001161	apela	apelin receptor early endogenous ligand	ENSDARG00000094729.2	100536023	ZDB-GENE-090313-116	Entrez gene ID import through exact transcript match from gffcompare and abbreviation match	Ens99 gene ID import through exact transcript match from gffcompare and abbreviation match
chr4	5333988	5340530	+	LL0000001162	apex1	APEX nuclease (multifunctional DNA repair enzyme) 1	ENSDARG00000045843.9	406730	ZDB-GENE-040426-2761	Entrez gene ID import through exact transcript match from gffcompare and abbreviation match	Ens99 gene ID import through exact transcript match from gffcompare and abbreviation match
chr8	22509508	22515042	-	LL0000001163	apex2	APEX nuclease (apurinic/apyrimidinic endonuclease) 2	ENSDARG00000008472.7	393115	ZDB-GENE-040426-835	Entrez gene ID import through exact transcript match from gffcompare and abbreviation match	Ens99 gene ID import through exact transcript match from gffcompare and abbreviation match
chr7	29176924	29186939	+	LL0000001164	aph1b	APH1B gamma secretase subunit	ENSDARG00000005612.9	386808	ZDB-GENE-031118-31	Entrez gene ID import through exact transcript match from gffcompare and abbreviation match	Ens99 gene ID import through exact transcript match from gffcompare and abbreviation match
chr25	30131055	30152213	+	LL0000001165	api5	apoptosis inhibitor 5	ENSDARG00000033597.11	321676	ZDB-GENE-030131-395	Entrez gene ID import through exact transcript match from gffcompare and abbreviation match	Ens99 gene ID import through exact transcript match from gffcompare and abbreviation match
chr7	49901466	49909101	+	LL0000001166	apip	APAF1 interacting protein	ENSDARG00000003132.10	447941	ZDB-GENE-040912-128	Entrez gene ID import through exact transcript match from gffcompare and abbreviation match	Ens99 gene ID import through exact transcript match from gffcompare and abbreviation match
chr14	33722950	33757715	+	LL0000001167	apln	apelin	ENSDARG00000053279.6	798375	ZDB-GENE-070521-8	Entrez gene ID import through exact transcript match from gffcompare and abbreviation match	Ens99 gene ID import through exact transcript match from gffcompare and abbreviation match
chr7	38685545	38689562	-	LL0000001168	aplnr2	apelin receptor 2	ENSDARG00000004447.9	793710	ZDB-GENE-030131-4347	Entrez gene ID import through exact transcript match from gffcompare and abbreviation match	Ens99 gene ID import through exact transcript match from gffcompare and abbreviation match
chr8	40325690	40327397	-	LL0000001169	aplnra	apelin receptor a	ENSDARG00000002172.10	561935	ZDB-GENE-060929-512	Entrez gene ID import through exact transcript match from gffcompare and abbreviation match	Ens99 gene ID import through exact transcript match from gffcompare and abbreviation match
chr10	8629275	8631361	+	LL0000001170	aplnrb	apelin receptor b	ENSDARG00000036670.8	565492	ZDB-GENE-050913-90	Entrez gene ID import through exact transcript match from gffcompare and abbreviation match	Ens99 gene ID import through exact transcript match from gffcompare and abbreviation match
chr15	37105986	37231035	+	LL0000001171	aplp1	amyloid beta (A4) precursor-like protein 1	ENSDARG00000098368.3	404233	ZDB-GENE-040319-1	Entrez gene ID import through exact transcript match from gffcompare and abbreviation match	Ens99 gene ID import through exact transcript match from gffcompare and abbreviation match
chr18	44364530	44527124	-	LL0000001172	aplp2	amyloid beta (A4) precursor-like protein 2	ENSDARG00000054864.6	796801	ZDB-GENE-061009-28	Entrez gene ID import through exact transcript match from gffcompare and abbreviation match	Ens99 gene ID import through exact transcript match from gffcompare and abbreviation match
chr13	6219250	6239872	+	LL0000001173	apmap	adipocyte plasma membrane associated protein	ENSDARG00000017422.7	266637	ZDB-GENE-020919-1	Entrez gene ID import through exact transcript match from gffcompare and abbreviation match	Ens99 gene ID import through exact transcript match from gffcompare and abbreviation match
chr3	31249885	31254979	-	LL0000001174	apnl	actinoporin-like protein	ENSDARG00000090900.3	100002992	ZDB-GENE-030131-8907	Entrez gene ID import through exact transcript match from gffcompare and abbreviation match	Ens99 gene ID import through exact transcript match from gffcompare and abbreviation match
chr5	37978501	37981521	+	LL0000001175	apoa1a	apolipoprotein A-Ia	ENSDARG00000012076.9	30355	ZDB-GENE-990415-14	Entrez gene ID import through exact transcript match from gffcompare and abbreviation match	Ens99 gene ID import through exact transcript match from gffcompare and abbreviation match
chr15	102925	108414	-	LL0000001176	apoa1b	apolipoprotein A-Ib	ENSDARG00000101324.2	100101640	ZDB-GENE-050302-172	Entrez gene ID import through exact transcript match from gffcompare and abbreviation match	Ens99 gene ID import through exact transcript match from gffcompare and abbreviation match
chr16	23978978	23980354	+	LL0000001177	apoa2	apolipoprotein A-II	ENSDARG00000015866.8	322327	ZDB-GENE-030131-1046	Entrez gene ID import through exact transcript match from gffcompare and abbreviation match	Ens99 gene ID import through exact transcript match from gffcompare and abbreviation match
chr19	10845953	10850834	+	LL0000001178	apoa4a	apolipoprotein A-IV a	ENSDARG00000101160.2	550608	ZDB-GENE-050417-469	Entrez gene ID import through exact transcript match from gffcompare and abbreviation match	Ens99 gene ID import through exact transcript match from gffcompare and abbreviation match
chr16	23913943	23916263	+	LL0000001179	apoa4b.1	apolipoprotein A-IV b, tandem duplicate 1	ENSDARG00000040298.9	322543	ZDB-GENE-030131-1263	Entrez gene ID import through exact transcript match from gffcompare and abbreviation match	Ens99 gene ID import through exact transcript match from gffcompare and abbreviation match
chr16	23921578	23948538	+	LL0000001180	apoa4b.2	apolipoprotein A-IV b, tandem duplicate 2	ENSDARG00000094929.3	570354	ZDB-GENE-030131-3143	Entrez gene ID import through exact transcript match from gffcompare and abbreviation match	Ens99 gene ID import through exact transcript match from gffcompare and abbreviation match
chr17	30704068	30727966	+	LL0000001181	apoba	apolipoprotein Ba	ENSDARG00000042780.6	566465	ZDB-GENE-070702-4	Entrez gene ID import through exact transcript match from gffcompare and abbreviation match	Ens99 gene ID import through exact transcript match from gffcompare and abbreviation match
chr20	31269702	31285980	+	LL0000001182	apobb.1	apolipoprotein Bb, tandem duplicate 1	ENSDARG00000022767.8	321166	ZDB-GENE-030131-9732	Entrez gene ID import through exact transcript match from gffcompare and abbreviation match	Ens99 gene ID import through exact transcript match from gffcompare and abbreviation match
chr20	53439588	53470252	+	LL0000001183	apobb.2	apolipoprotein Bb, tandem duplicate 2	ENSDARG00000075016.8	100330435	ZDB-GENE-070705-554	Entrez gene ID import through exact transcript match from gffcompare and abbreviation match	Ens99 gene ID import through exact transcript match from gffcompare and abbreviation match
chr22	641342	651719	-	LL0000001184	apobec2a	apolipoprotein B mRNA editing enzyme, catalytic polypeptide-like 2a	ENSDARG00000018881.9	503736	ZDB-GENE-050306-15	Entrez gene ID import through exact transcript match from gffcompare and abbreviation match	Ens99 gene ID import through exact transcript match from gffcompare and abbreviation match
chr23	19213472	19221027	+	LL0000001185	apobec2b	apolipoprotein B mRNA editing enzyme, catalytic polypeptide-like 2b	ENSDARG00000113992.1	567047	ZDB-GENE-090618-1	Entrez gene ID import through exact transcript match from gffcompare and abbreviation match	Ens99 gene ID import through exact transcript match from gffcompare and abbreviation match
chr16	23972126	23973723	+	LL0000001186	apoc1	apolipoprotein C-I	ENSDARG00000092170.3	570638	ZDB-GENE-030131-1074	Entrez gene ID import through exact transcript match from gffcompare and abbreviation match	Ens99 gene ID import through exact transcript match from gffcompare and abbreviation match
chr16	23984179	23994642	+	LL0000001187	apoc2	apolipoprotein C-II	ENSDARG00000092155.3	568972	ZDB-GENE-030131-2168	Entrez gene ID import through exact transcript match from gffcompare and abbreviation match	Ens99 gene ID import through exact transcript match from gffcompare and abbreviation match
chr16	23975930	23977525	+	LL0000001188	apoc4	apolipoprotein C-IV	ENSDARG00000075614.4	570390	ZDB-GENE-081022-25	Entrez gene ID import through exact transcript match from gffcompare and abbreviation match	Ens99 gene ID import through exact transcript match from gffcompare and abbreviation match
chr2	37207799	37210397	-	LL0000001189	apoda.1	apolipoprotein Da, duplicate 1	ENSDARG00000060345.5	767642	ZDB-GENE-060929-148	Entrez gene ID import through exact transcript match from gffcompare and abbreviation match	Ens99 gene ID import through exact transcript match from gffcompare and abbreviation match
chr2	37207461	37215989	+	LL0000001190	apoda.2	apolipoprotein Da, duplicate 2	ENSDARG00000060350.6	100148022	ZDB-GENE-070912-551	Entrez gene ID import through exact transcript match from gffcompare and abbreviation match	Ens99 gene ID import through exact transcript match from gffcompare and abbreviation match
chr24	26306362	26328721	-	LL0000001191	apodb	apolipoprotein Db	ENSDARG00000057437.6	567972	ZDB-GENE-051023-8	Entrez gene ID import through exact transcript match from gffcompare and abbreviation match	Ens99 gene ID import through exact transcript match from gffcompare and abbreviation match
chr19	10855158	10859694	+	LL0000001192	apoea	apolipoprotein Ea	ENSDARG00000102004.2	553587	ZDB-GENE-010724-18	Entrez gene ID import through exact transcript match from gffcompare and abbreviation match	Ens99 gene ID import through exact transcript match from gffcompare and abbreviation match
chr16	23960744	23963592	+	LL0000001193	apoeb	apolipoprotein Eb	ENSDARG00000040295.6	30314	ZDB-GENE-980526-368	Entrez gene ID import through exact transcript match from gffcompare and abbreviation match	Ens99 gene ID import through exact transcript match from gffcompare and abbreviation match
chr6	39162294	39167732	-	LL0000001194	apof	apolipoprotein F	ENSDARG00000090980.4	793418	ZDB-GENE-031204-36	Entrez gene ID import through exact transcript match from gffcompare and abbreviation match	Ens99 gene ID import through exact transcript match from gffcompare and abbreviation match
chr2	37967831	37974727	+	LL0000001195	apol1	apolipoprotein L, 1	ENSDARG00000007425.9	560340	ZDB-GENE-030131-3217	Entrez gene ID import through exact transcript match from gffcompare and abbreviation match	Ens99 gene ID import through exact transcript match from gffcompare and abbreviation match
chr2	42228739	42234561	-	LL0000001196	apom	apolipoprotein M	ENSDARG00000076838.6	569714	ZDB-GENE-010605-5	Entrez gene ID import through exact transcript match from gffcompare and abbreviation match	Ens99 gene ID import through exact transcript match from gffcompare and abbreviation match
chr5	4382378	4418582	-	LL0000001197	apooa	apolipoprotein O, a	ENSDARG00000104696.3	641319	ZDB-GENE-031118-91	Entrez gene ID import through exact transcript match from gffcompare and abbreviation match	Ens99 gene ID import through exact transcript match from gffcompare and abbreviation match
chr24	21978230	21989406	-	LL0000001198	apoob	apolipoprotein O, b	ENSDARG00000026444.10	449837	ZDB-GENE-041001-40	Entrez gene ID import through exact transcript match from gffcompare and abbreviation match	Ens99 gene ID import through exact transcript match from gffcompare and abbreviation match
chr5	22849806	22868683	-	LL0000001199	apool	apolipoprotein O-like	ENSDARG00000039374.7	541537	ZDB-GENE-050327-76	Entrez gene ID import through exact transcript match from gffcompare and abbreviation match	Ens99 gene ID import through exact transcript match from gffcompare and abbreviation match
chr13	15800742	15814776	+	LL0000001200	apopt1	apoptogenic 1, mitochondrial [Source:ZFIN;Acc:ZDB-GENE-090313-66]	ENSDARG00000092473.2	798687	ZDB-GENE-090313-66	Entrez gene ID import through exact transcript match from gffcompare and abbreviation match	geneAbbrev conflict with Ens99 but matches ZFIN alias
chr1	617620	656851	-	LL0000001201	appa	amyloid beta (A4) precursor protein a	ENSDARG00000104279.2	58083	ZDB-GENE-000616-13	Entrez gene ID import through exact transcript match from gffcompare and abbreviation match	Ens99 gene ID import through exact transcript match from gffcompare and abbreviation match
chr9	35026415	35155089	-	LL0000001202	appb	amyloid beta (A4) precursor protein b	ENSDARG00000055543.8	170846	ZDB-GENE-020220-1	Entrez gene ID import through exact transcript match from gffcompare and abbreviation match	Ens99 gene ID import through exact transcript match from gffcompare and abbreviation match
chr15	23920243	23942934	-	LL0000001203	appbp2	amyloid beta precursor protein (cytoplasmic tail) binding protein 2	ENSDARG00000007566.11	322995	ZDB-GENE-030131-1715	Entrez gene ID import through exact transcript match from gffcompare and abbreviation match	Ens99 gene ID import through exact transcript match from gffcompare and abbreviation match
chr11	42600804	42629365	+	LL0000001204	appl1	adaptor protein, phosphotyrosine interaction, PH domain and leucine zipper containing 1		571540	ZDB-GENE-081016-1	Entrez gene ID import through exact transcript match from gffcompare and abbreviation match	Ens99 gene ID import by transcript match; but abbreviation conflict and limited gene overlap; may be complex gene structure or incorrect Ensembl assignment
chr25	5755314	5815865	-	LL0000001205	appl2	adaptor protein, phosphotyrosine interaction, PH domain and leucine zipper containing 2	ENSDARG00000100151.2	100000135	ZDB-GENE-081016-2	Entrez gene ID import through exact transcript match from gffcompare and abbreviation match	Ens99 gene ID import through exact transcript match from gffcompare and abbreviation match
chr7	55530360	55539805	-	LL0000001206	aprt	adenine phosphoribosyltransferase	ENSDARG00000003519.10	393641	ZDB-GENE-040426-1492	Entrez gene ID import through exact transcript match from gffcompare and abbreviation match	Ens99 gene ID import through exact transcript match from gffcompare and abbreviation match
chr1	52653617	52659711	-	LL0000001207	aptx	aprataxin	ENSDARG00000027143.8	405797	ZDB-GENE-040628-2	Entrez gene ID import through exact transcript match from gffcompare and abbreviation match	Ens99 gene ID import through exact transcript match from gffcompare and abbreviation match
chr16	22288577	22294265	-	LL0000001208	aqp10a	aquaporin 10a	ENSDARG00000007086.11	436621	ZDB-GENE-040718-40	Entrez gene ID import through exact transcript match from gffcompare and abbreviation match	Ens99 gene ID import through exact transcript match from gffcompare and abbreviation match
chr19	7809501	7818037	+	LL0000001209	aqp10b	aquaporin 10b	ENSDARG00000058678.6	100034395	ZDB-GENE-060503-57	Entrez gene ID import through exact transcript match from gffcompare and abbreviation match	Ens99 gene ID import through exact transcript match from gffcompare and abbreviation match
chr18	3157911	3166726	-	LL0000001210	aqp11	aquaporin 11	ENSDARG00000100555.2	553476	ZDB-GENE-080418-1	Entrez gene ID import through exact transcript match from gffcompare and abbreviation match	Ens99 gene ID import through exact transcript match from gffcompare and abbreviation match
chr22	2874838	2886937	-	LL0000001211	aqp12	aquaporin 12	ENSDARG00000043279.8	436844	ZDB-GENE-040718-310	Entrez gene ID import through exact transcript match from gffcompare and abbreviation match	Ens99 gene ID import through exact transcript match from gffcompare and abbreviation match
chr2	2737422	2749333	+	LL0000001212	aqp1a.1	aquaporin 1a (Colton blood group), tandem duplicate 1	ENSDARG00000023713.9	335821	ZDB-GENE-030131-7764	Entrez gene ID import through exact transcript match from gffcompare and abbreviation match	Ens99 gene ID import through exact transcript match from gffcompare and abbreviation match
chr2	2761621	2770569	+	LL0000001213	aqp1a.2	aquaporin 1a (Colton blood group), tandem duplicate 2	ENSDARG00000091027.2	559284	ZDB-GENE-100409-1	Entrez gene ID import through exact transcript match from gffcompare and abbreviation match	Ens99 gene ID import through exact transcript match from gffcompare and abbreviation match
chr5	43006422	43011814	+	LL0000001214	aqp3a	aquaporin 3a	ENSDARG00000003808.5	406777	ZDB-GENE-040426-2826	Entrez gene ID import through exact transcript match from gffcompare and abbreviation match	Ens99 gene ID import through exact transcript match from gffcompare and abbreviation match
chr21	16980114	16989582	+	LL0000001215	aqp3b	aquaporin 3b	ENSDARG00000069518.5	568049	ZDB-GENE-040724-66	Entrez gene ID import through exact transcript match from gffcompare and abbreviation match	Ens99 gene ID import through exact transcript match from gffcompare and abbreviation match
chr20	18163315	18190325	+	LL0000001216	aqp4	aquaporin 4	ENSDARG00000010565.8	445293	ZDB-GENE-040724-152	Entrez gene ID import through exact transcript match from gffcompare and abbreviation match	Ens99 gene ID import through exact transcript match from gffcompare and abbreviation match
chr21	12010491	12022592	+	LL0000001217	aqp7	aquaporin 7	ENSDARG00000026787.10	334529	ZDB-GENE-030131-6461	Entrez gene ID import through exact transcript match from gffcompare and abbreviation match	Ens99 gene ID import through exact transcript match from gffcompare and abbreviation match
chr12	20366109	20373165	-	LL0000001218	aqp8a.1	aquaporin 8a, tandem duplicate 1	ENSDARG00000045141.6	447923	ZDB-GENE-040912-106	Entrez gene ID import through exact transcript match from gffcompare and abbreviation match	Ens99 gene ID import through exact transcript match from gffcompare and abbreviation match
chr12	20354691	20362061	-	LL0000001219	aqp8a.2	aquaporin 8a, tandem duplicate 2	ENSDARG00000071592.4	563130	ZDB-GENE-070112-1802	Entrez gene ID import through exact transcript match from gffcompare and abbreviation match	Ens99 gene ID import through exact transcript match from gffcompare and abbreviation match
chr3	18572279	18575868	-	LL0000001220	aqp8b	aquaporin 8b	ENSDARG00000089749.4	555598	ZDB-GENE-080220-47	Entrez gene ID import through exact transcript match from gffcompare and abbreviation match	Ens99 gene ID import through exact transcript match from gffcompare and abbreviation match
chr25	172328	207918	-	LL0000001221	aqp9a	aquaporin 9a		606660	ZDB-GENE-050809-119	Entrez gene ID import through exact transcript match from gffcompare and abbreviation match	multiple overlapping gene/transcript annotations preventing unambiguous assignment of Ens99 gene ID
chr7	30371893	30390376	+	LL0000001222	aqp9b	aquaporin 9b	ENSDARG00000053480.7	570191	ZDB-GENE-070911-1	Entrez gene ID import through exact transcript match from gffcompare and abbreviation match	Ens99 gene ID import through exact transcript match from gffcompare and abbreviation match
chr17	51020024	51121879	-	LL0000001223	aqr	aquarius intron-binding spliceosomal factor	ENSDARG00000016775.10	393436	ZDB-GENE-040426-1189	Entrez gene ID import through exact transcript match from gffcompare and abbreviation match	Ens99 gene ID import through exact transcript match from gffcompare and abbreviation match
chr5	35561334	35682376	+	LL0000001224	ar	androgen receptor	ENSDARG00000067976.6	100005148	ZDB-GENE-060131-1	Entrez gene ID import through exact transcript match from gffcompare and abbreviation match	Ens99 gene ID import through exact transcript match from gffcompare and abbreviation match
chr5	26853069	26869392	+	LL0000001225	araf	A-Raf proto-oncogene, serine/threonine kinase	ENSDARG00000054533.7	403063	ZDB-GENE-050102-2	Entrez gene ID import through exact transcript match from gffcompare and abbreviation match	Ens99 gene ID import through exact transcript match from gffcompare and abbreviation match
chr15	46915147	46928795	-	LL0000001226	arap1	ArfGAP with RhoGAP domain, ankyrin repeat and PH domain 1		101883993	ZDB-GENE-130723-3	Entrez gene ID import through exact transcript match from gffcompare and abbreviation match	no overlapping transcript based on gffcompare
chr5	23887539	23909970	-	LL0000001227	arap1a	ArfGAP with RhoGAP domain, ankyrin repeat and PH domain 1a	ENSDARG00000062221.10	571767	ZDB-GENE-030131-6226	Ens99 gene ID import through exact transcript match from gffcompare; abbrev conflict matches ZFIN alias	Ens99 gene ID import through exact transcript match from gffcompare and abbreviation match
chr14	26566919	26626226	+	LL0000001228	arap3	ArfGAP with RhoGAP domain, ankyrin repeat and PH domain 3	ENSDARG00000076801.6	558931	ZDB-GENE-091019-1	Entrez gene ID import through exact transcript match from gffcompare and abbreviation match	Ens99 gene ID import through exact transcript match from gffcompare and abbreviation match
chr5	30502249	30516646	-	LL0000001229	arcn1a	archain 1a	ENSDARG00000002792.8	266982	ZDB-GENE-021031-2	Entrez gene ID import through exact transcript match from gffcompare and abbreviation match	Ens99 gene ID import through exact transcript match from gffcompare and abbreviation match
chr15	18102275	18115624	-	LL0000001230	arcn1b	archain 1b	ENSDARG00000031214.8	399661	ZDB-GENE-040121-7	Entrez gene ID import through exact transcript match from gffcompare and abbreviation match	Ens99 gene ID import through exact transcript match from gffcompare and abbreviation match
chr5	6755466	6790842	+	LL0000001231	areg	amphiregulin	ENSDARG00000076853.4	101884611	ZDB-GENE-141216-239	Entrez gene ID import through exact transcript match from gffcompare and abbreviation match	Ens99 gene ID import through exact transcript match from gffcompare and abbreviation match
chr17	49484640	49530045	+	LL0000001232	AREL1	apoptosis resistant E3 ubiquitin protein ligase 1 [Source:NCBI gene;Acc:100332031]	ENSDARG00000100359.2	100332031		partial transcript overlap; "j" class in gffcompare; no abbreviation match	Ens99 gene ID import through exact transcript match from gffcompare and abbreviation match
chr2	3062737	3077027	-	LL0000001233	arf1	ADP-ribosylation factor 1	ENSDARG00000009484.9	114428	ZDB-GENE-010724-5	Entrez gene ID import through exact transcript match from gffcompare and abbreviation match	Ens99 gene ID import through exact transcript match from gffcompare and abbreviation match
chr3	37558491	37588855	-	LL0000001234	arf2a	ADP-ribosylation factor 2a	ENSDARG00000014763.8	399477	ZDB-GENE-040122-4	Entrez gene ID import through exact transcript match from gffcompare and abbreviation match	Ens99 gene ID import through exact transcript match from gffcompare and abbreviation match
chr24	36392040	36399271	+	LL0000001235	arf2b	ADP-ribosylation factor 2b	ENSDARG00000016393.8	327026	ZDB-GENE-030131-5234	Entrez gene ID import through exact transcript match from gffcompare and abbreviation match	Ens99 gene ID import through exact transcript match from gffcompare and abbreviation match
chr23	27622020	27633730	-	LL0000001236	arf3a	ADP-ribosylation factor 3a	ENSDARG00000070539.7	445047	ZDB-GENE-040801-176	Entrez gene ID import through exact transcript match from gffcompare and abbreviation match	Ens99 gene ID import through exact transcript match from gffcompare and abbreviation match
chr6	7444899	7452559	+	LL0000001237	arf3b	ADP-ribosylation factor 3b	ENSDARG00000036998.4	368822	ZDB-GENE-030616-356	Entrez gene ID import through exact transcript match from gffcompare and abbreviation match	Ens99 gene ID import through exact transcript match from gffcompare and abbreviation match
chr11	42482920	42503653	+	LL0000001238	arf4a	ADP-ribosylation factor 4a	ENSDARG00000103858.2	445196	ZDB-GENE-040801-109	Entrez gene ID import through exact transcript match from gffcompare and abbreviation match	Ens99 gene ID import through exact transcript match from gffcompare and abbreviation match
chr11	42466834	42472941	-	LL0000001239	arf4b	ADP-ribosylation factor 4b	ENSDARG00000100339.2	550402	ZDB-GENE-050417-205	Entrez gene ID import through exact transcript match from gffcompare and abbreviation match	Ens99 gene ID import through exact transcript match from gffcompare and abbreviation match
chr18	7515141	7553756	+	LL0000001240	arf5	ADP-ribosylation factor 5	ENSDARG00000070472.6	378724	ZDB-GENE-030910-5	Entrez gene ID import through exact transcript match from gffcompare and abbreviation match	Ens99 gene ID import through exact transcript match from gffcompare and abbreviation match
chr11	42474694	42481817	+	LL0000001241	ARF5 (1 of many)	zgc:110286 [Source:ZFIN;Acc:ZDB-GENE-050417-68]	ENSDARG00000074210.4	550265	ZDB-GENE-050417-68	geneAbbrevConflict; gffcompare transcript match; overlap gene coordinates >50%	Ens99 gene ID import by transcript match; but abbreviation conflict and limited gene overlap; may be complex gene structure or incorrect Ensembl assignment
chr20	54196543	54198130	-	LL0000001242	arf6a	ADP-ribosylation factor 6a	ENSDARG00000101626.2	336063	ZDB-GENE-030131-8007	Entrez gene ID import through exact transcript match from gffcompare and abbreviation match	Ens99 gene ID import through exact transcript match from gffcompare and abbreviation match
chr17	45731865	45734459	-	LL0000001243	arf6b	ADP-ribosylation factor 6b	ENSDARG00000052928.5	100003206	ZDB-GENE-030131-9056	Entrez gene ID import through exact transcript match from gffcompare and abbreviation match	Ens99 gene ID import through exact transcript match from gffcompare and abbreviation match
chr11	109274	129165	-	LL0000001244	arfgap1	ADP-ribosylation factor GTPase activating protein 1	ENSDARG00000101616.2	100149572	ZDB-GENE-041114-130	Entrez gene ID import through exact transcript match from gffcompare and abbreviation match	Ens99 gene ID import through exact transcript match from gffcompare and abbreviation match
chr18	44849809	44877073	+	LL0000001245	arfgap2	ADP-ribosylation factor GTPase activating protein 2	ENSDARG00000067601.5	641490	ZDB-GENE-051120-177	Entrez gene ID import through exact transcript match from gffcompare and abbreviation match	Ens99 gene ID import through exact transcript match from gffcompare and abbreviation match
chr4	77957611	77965510	+	LL0000001246	arfgap3	ADP-ribosylation factor GTPase activating protein 3	ENSDARG00000097583.4	402889	ZDB-GENE-040426-1	Entrez gene ID import through exact transcript match from gffcompare and abbreviation match	Ens99 gene ID import through exact transcript match from gffcompare and abbreviation match
chr24	18736916	18877118	-	LL0000001247	arfgef1	ADP-ribosylation factor guanine nucleotide-exchange factor 1 (brefeldin A-inhibited)	ENSDARG00000063474.8	100329953	ZDB-GENE-030131-108	Entrez gene ID import through exact transcript match from gffcompare and abbreviation match	Ens99 gene ID import through exact transcript match from gffcompare and abbreviation match
chr23	18985127	19051953	-	LL0000001248	arfgef2	ADP-ribosylation factor guanine nucleotide-exchange factor 2 (brefeldin A-inhibited)	ENSDARG00000074702.5	100334572	ZDB-GENE-090312-50	Entrez gene ID import through exact transcript match from gffcompare and abbreviation match	Ens99 gene ID import through exact transcript match from gffcompare and abbreviation match
chr13	2442484	2499591	+	LL0000001249	arfgef3	ARFGEF family member 3	ENSDARG00000077656.6	562652	ZDB-GENE-081107-37	Entrez gene ID import through exact transcript match from gffcompare and abbreviation match	Ens99 gene ID import through exact transcript match from gffcompare and abbreviation match
chr1	25440951	25486571	-	LL0000001250	arfip1	ADP-ribosylation factor interacting protein 1 (arfaptin 1)	ENSDARG00000070055.6	100003895	ZDB-GENE-040426-2690	Entrez gene ID import through exact transcript match from gffcompare and abbreviation match	Ens99 gene ID import through exact transcript match from gffcompare and abbreviation match
chr15	32249010	32267158	+	LL0000001251	arfip2a	ADP-ribosylation factor interacting protein 2a	ENSDARG00000059244.7	449664	ZDB-GENE-041010-221	Entrez gene ID import through exact transcript match from gffcompare and abbreviation match	Ens99 gene ID import through exact transcript match from gffcompare and abbreviation match
chr10	26205779	26225678	-	LL0000001252	arfip2b	ADP-ribosylation factor interacting protein 2b	ENSDARG00000056664.7	550342	ZDB-GENE-050417-131	Entrez gene ID import through exact transcript match from gffcompare and abbreviation match	Ens99 gene ID import through exact transcript match from gffcompare and abbreviation match
chr6	58522557	58533134	+	LL0000001253	arfrp1	ADP-ribosylation factor related protein 1	ENSDARG00000057857.8	503602	ZDB-GENE-050227-14	Entrez gene ID import through exact transcript match from gffcompare and abbreviation match	Ens99 gene ID import through exact transcript match from gffcompare and abbreviation match
chr12	9592897	9617793	-	LL0000001254	arg1	arginase 1	ENSDARG00000057429.6	570368	ZDB-GENE-040724-181	Entrez gene ID import through exact transcript match from gffcompare and abbreviation match	Ens99 gene ID import through exact transcript match from gffcompare and abbreviation match
chr13	33024547	33034374	+	LL0000001255	arg2	arginase 2	ENSDARG00000039269.5	322614	ZDB-GENE-030131-1334	Entrez gene ID import through exact transcript match from gffcompare and abbreviation match	Ens99 gene ID import through exact transcript match from gffcompare and abbreviation match
chr9	26086135	26097070	+	LL0000001256	arglu1a	arginine and glutamate rich 1a	ENSDARG00000019223.7	406834	ZDB-GENE-040426-2914	Entrez gene ID import through exact transcript match from gffcompare and abbreviation match	Ens99 gene ID import through exact transcript match from gffcompare and abbreviation match
chr1	7661471	7673461	-	LL0000001257	arglu1b	arginine and glutamate rich 1b	ENSDARG00000018319.7	393131	ZDB-GENE-040426-736	Entrez gene ID import through exact transcript match from gffcompare and abbreviation match	Ens99 gene ID import through exact transcript match from gffcompare and abbreviation match
chr7	38762043	38785798	+	LL0000001258	arhgap1	Rho GTPase activating protein 1	ENSDARG00000024324.6	550478	ZDB-GENE-050417-305	Entrez gene ID import through exact transcript match from gffcompare and abbreviation match	Ens99 gene ID import through exact transcript match from gffcompare and abbreviation match
chr1	36771954	36913091	+	LL0000001259	arhgap10	Rho GTPase activating protein 10	ENSDARG00000078326.6	692277	ZDB-GENE-060512-221	Entrez gene ID import through exact transcript match from gffcompare and abbreviation match	Ens99 gene ID import through exact transcript match from gffcompare and abbreviation match
chr17	92784	114511	-	LL0000001260	arhgap11a	Rho GTPase activating protein 11A	ENSDARG00000100019.2	406608	ZDB-GENE-040426-2562	Entrez gene ID import through exact transcript match from gffcompare and abbreviation match	Ens99 gene ID import through exact transcript match from gffcompare and abbreviation match
chr2	43749187	43797223	+	LL0000001261	arhgap12a	Rho GTPase activating protein 12a	ENSDARG00000008548.11	563267	ZDB-GENE-050809-38	Entrez gene ID import through exact transcript match from gffcompare and abbreviation match	Ens99 gene ID import through exact transcript match from gffcompare and abbreviation match
chr12	26621906	26726048	+	LL0000001262	arhgap12b	Rho GTPase activating protein 12b	ENSDARG00000026482.7	393848	ZDB-GENE-040426-1727	Entrez gene ID import through exact transcript match from gffcompare and abbreviation match	Ens99 gene ID import through exact transcript match from gffcompare and abbreviation match
chr9	25924135	25994196	-	LL0000001263	arhgap15	Rho GTPase activating protein 15	ENSDARG00000062349.6	100003547	ZDB-GENE-070912-314	Entrez gene ID import through exact transcript match from gffcompare and abbreviation match	Ens99 gene ID import through exact transcript match from gffcompare and abbreviation match
chr12	20412293	20485475	+	LL0000001264	arhgap17a	Rho GTPase activating protein 17a	ENSDARG00000020488.10	550254	ZDB-GENE-050417-56	Entrez gene ID import through exact transcript match from gffcompare and abbreviation match	Ens99 gene ID import through exact transcript match from gffcompare and abbreviation match
chr3	18579806	18650629	+	LL0000001265	arhgap17b	Rho GTPase activating protein 17b	ENSDARG00000062263.6	100141341	ZDB-GENE-080220-26	Entrez gene ID import through exact transcript match from gffcompare and abbreviation match	Ens99 gene ID import through exact transcript match from gffcompare and abbreviation match
chr20	2058951	2102654	-	LL0000001266	arhgap18	Rho GTPase activating protein 18	ENSDARG00000074740.4	100004252	ZDB-GENE-070502-1	partial transcript match; "j" class in gffcompare; abbreviation match	Ens99 gene ID import through exact transcript match from gffcompare and abbreviation match
chr22	34956750	34979183	-	LL0000001267	arhgap19	Rho GTPase activating protein 19	ENSDARG00000083189.5	100537002	ZDB-GENE-100922-157	Entrez gene ID import through exact transcript match from gffcompare and abbreviation match	Ens99 gene ID import through exact transcript match from gffcompare and abbreviation match
chr9	29528379	29545462	-	LL0000001268	arhgap20	Rho GTPase activating protein 20	ENSDARG00000089326.3	796434	ZDB-GENE-071015-1	Entrez gene ID import through exact transcript match from gffcompare and abbreviation match	Ens99 gene ID import through exact transcript match from gffcompare and abbreviation match
chr5	22263875	22334996	+	LL0000001269	arhgap20b	Rho GTPase activating protein 20b	ENSDARG00000093708.3	100002649	ZDB-GENE-060526-383	Entrez gene ID import through exact transcript match from gffcompare and abbreviation match	Ens99 gene ID import through exact transcript match from gffcompare and abbreviation match
chr24	6511198	6647275	-	LL0000001270	arhgap21a	Rho GTPase activating protein 21a	ENSDARG00000104295.2	556095	ZDB-GENE-090918-5	geneAbbrevConflict; gffcompare transcript match; overlap gene coordinates >50%	Ens99 gene ID import through exact transcript match from gffcompare and abbreviation match
chr2	12302527	12406641	+	LL0000001271	arhgap21b	Rho GTPase activating protein 21b	ENSDARG00000075673.7	326745	ZDB-GENE-030131-4944	Entrez gene ID import through exact transcript match from gffcompare and abbreviation match	Ens99 gene ID import through exact transcript match from gffcompare and abbreviation match
chr13	31097948	31144274	+	LL0000001272	arhgap22	Rho GTPase activating protein 22	ENSDARG00000021255.12	562503	ZDB-GENE-090313-87	Entrez gene ID import through exact transcript match from gffcompare and abbreviation match	Ens99 gene ID import through exact transcript match from gffcompare and abbreviation match
chr12	2446666	2496292	+	LL0000001273	ARHGAP22 (1 of many)	si:dkey-191m6.4 [Source:ZFIN;Acc:ZDB-GENE-121214-182]	ENSDARG00000076434.4	555573	ZDB-GENE-121214-182	geneAbbrevConflict; gffcompare transcript match; overlap gene coordinates >90%	geneAbbrevConflict; gffcompare transcript match; overlap gene coordinates >90%
chr3	39313052	39363065	-	LL0000001274	arhgap23a	Rho GTPase activating protein 23a	ENSDARG00000052950.8	100006233	ZDB-GENE-121019-1	Entrez gene ID import through exact transcript match from gffcompare and abbreviation match	Ens99 gene ID import through exact transcript match from gffcompare and abbreviation match
chr12	15476839	15561869	+	LL0000001275	arhgap23b	Rho GTPase activating protein 23b	ENSDARG00000026840.11	562244	ZDB-GENE-081031-78	Entrez gene ID import through exact transcript match from gffcompare and abbreviation match	Ens99 gene ID import through exact transcript match from gffcompare and abbreviation match
chr21	9731603	9956041	-	LL0000001276	arhgap24	Rho GTPase activating protein 24	ENSDARG00000100973.2	100005116	ZDB-GENE-091118-20	Entrez gene ID import through exact transcript match from gffcompare and abbreviation match	Ens99 gene ID import through exact transcript match from gffcompare and abbreviation match
chr5	21174007	21204241	+	LL0000001277	arhgap25	Rho GTPase activating protein 25	ENSDARG00000061784.4	562468	ZDB-GENE-060526-210	Entrez gene ID import through exact transcript match from gffcompare and abbreviation match	Ens99 gene ID import through exact transcript match from gffcompare and abbreviation match
chr12	4971515	5046129	+	LL0000001278	arhgap27	Rho GTPase activating protein 27	ENSDARG00000104255.2	564211	ZDB-GENE-030131-3922	Entrez gene ID import through exact transcript match from gffcompare and abbreviation match	Ens99 gene ID import through exact transcript match from gffcompare and abbreviation match
chr3	22375596	22422169	-	LL0000001279	arhgap27l	Rho GTPase activating protein 27, like	ENSDARG00000061798.7	566523	ZDB-GENE-120406-11	Entrez gene ID import through exact transcript match from gffcompare and abbreviation match	Ens99 gene ID import through exact transcript match from gffcompare and abbreviation match
chr24	41786274	41888016	-	LL0000001280	arhgap28	Rho GTPase activating protein 28	ENSDARG00000101350.2	492794	ZDB-GENE-041114-147	Entrez gene ID import through exact transcript match from gffcompare and abbreviation match	Ens99 gene ID import through exact transcript match from gffcompare and abbreviation match
chr24	28443536	28558019	+	LL0000001281	arhgap29a	Rho GTPase activating protein 29a	ENSDARG00000026329.10	564805	ZDB-GENE-030131-9510	Entrez gene ID import through exact transcript match from gffcompare and abbreviation match	Ens99 gene ID import through exact transcript match from gffcompare and abbreviation match
chr2	15128027	15198117	+	LL0000001282	arhgap29b	Rho GTPase activating protein 29b	ENSDARG00000017748.11	378998	ZDB-GENE-031010-44	Entrez gene ID import through exact transcript match from gffcompare and abbreviation match	Ens99 gene ID import through exact transcript match from gffcompare and abbreviation match
chr5	67667181	67730896	-	LL0000001283	arhgap31	Rho GTPase activating protein 31	ENSDARG00000059472.8	101885883	ZDB-GENE-100922-256	Entrez gene ID import through exact transcript match from gffcompare and abbreviation match	Ens99 gene ID import through exact transcript match from gffcompare and abbreviation match
chr15	19036377	19128705	-	LL0000001284	arhgap32a	Rho GTPase activating protein 32a	ENSDARG00000075334.6	562449	ZDB-GENE-060503-918	Entrez gene ID import through exact transcript match from gffcompare and abbreviation match	Ens99 gene ID import through exact transcript match from gffcompare and abbreviation match
chr21	24537946	24677216	-	LL0000001285	arhgap32b	Rho GTPase activating protein 32b	ENSDARG00000074184.6	569434	ZDB-GENE-091204-147	Entrez gene ID import through exact transcript match from gffcompare and abbreviation match	Ens99 gene ID import through exact transcript match from gffcompare and abbreviation match
chr16	44783576	44878358	-	LL0000001286	arhgap33	Rho GTPase activating protein 33	ENSDARG00000011333.11	569720	ZDB-GENE-121105-12	Entrez gene ID import through exact transcript match from gffcompare and abbreviation match	Ens99 gene ID import through exact transcript match from gffcompare and abbreviation match
chr15	8604477	8763106	-	LL0000001287	arhgap35a	Rho GTPase activating protein 35a	ENSDARG00000062577.7	100004299	ZDB-GENE-120516-2	geneAbbrevConflict; gffcompare transcript match; overlap gene coordinates >90%	Ens99 gene ID import through exact transcript match from gffcompare and abbreviation match
chr5	37861765	37881679	-	LL0000001288	arhgap35b	Rho GTPase activating protein 35b	ENSDARG00000060297.8	564565	ZDB-GENE-060526-44	Ens99 gene ID import through exact transcript match from gffcompare; abbrev conflict matches ZFIN alias	Ens99 gene ID import through exact transcript match from gffcompare and abbreviation match
chr7	51362065	51461665	-	LL0000001289	arhgap36	Rho GTPase activating protein 36	ENSDARG00000059672.8	559813	ZDB-GENE-060616-298	geneAbbrevConflict; gffcompare transcript match; overlap gene coordinates >90%	Ens99 gene ID import through exact transcript match from gffcompare and abbreviation match
chr20	52333300	52452557	+	LL0000001290	arhgap39	Rho GTPase activating protein 39	ENSDARG00000100007.2	101884459	ZDB-GENE-041014-247	Entrez gene ID import through exact transcript match from gffcompare and abbreviation match	Ens99 gene ID import through exact transcript match from gffcompare and abbreviation match
chr21	22738931	22796064	+	LL0000001291	arhgap42a	Rho GTPase activating protein 42a	ENSDARG00000056619.7	566275	ZDB-GENE-030131-8077	Entrez gene ID import through exact transcript match from gffcompare and abbreviation match	Ens99 gene ID import through exact transcript match from gffcompare and abbreviation match
chr18	41853847	42072147	-	LL0000001292	arhgap42b	Rho GTPase activating protein 42b	ENSDARG00000010654.9	569534	ZDB-GENE-120217-5	geneAbbrevConflict; gffcompare transcript match; overlap gene coordinates >90%	Ens99 gene ID import through exact transcript match from gffcompare and abbreviation match
chr12	48480255	48539995	+	LL0000001293	arhgap44	Rho GTPase activating protein 44	ENSDARG00000104549.2	100333556	ZDB-GENE-120206-2	Entrez gene ID import through exact transcript match from gffcompare and abbreviation match	Ens99 gene ID import through exact transcript match from gffcompare and abbreviation match
chr23	24989387	25015614	+	LL0000001294	arhgap4a	Rho GTPase activating protein 4a	ENSDARG00000039265.8	393416	ZDB-GENE-040426-1229	Entrez gene ID import through exact transcript match from gffcompare and abbreviation match	Ens99 gene ID import through exact transcript match from gffcompare and abbreviation match
chr23	18615242	18687515	-	LL0000001295	arhgap4b	Rho GTPase activating protein 4b	ENSDARG00000015003.11	561231	ZDB-GENE-090311-38	Entrez gene ID import through exact transcript match from gffcompare and abbreviation match	Ens99 gene ID import through exact transcript match from gffcompare and abbreviation match
chr17	31739404	31798265	+	LL0000001296	arhgap5	Rho GTPase activating protein 5	ENSDARG00000061294.7	795752	ZDB-GENE-081014-1	Entrez gene ID import through exact transcript match from gffcompare and abbreviation match	Ens99 gene ID import through exact transcript match from gffcompare and abbreviation match
chrUn_KN149984v1	32189	61716	-	LL0000001297	ARHGAP6	Rho GTPase activating protein 6 [Source:HGNC Symbol;Acc:HGNC:676]	ENSDARG00000111170.1	101882360		Ens99 gene ID import through exact transcript match from gffcompare; abbrev conflict matches ZFIN alias	Ens99 gene ID import through exact transcript match from gffcompare and abbreviation match
chr3	59899452	59947208	+	LL0000001298	arhgdia	Rho GDP dissociation inhibitor (GDI) alpha	ENSDARG00000043795.6	406770	ZDB-GENE-040426-2816	Entrez gene ID import through exact transcript match from gffcompare and abbreviation match	Ens99 gene ID import through exact transcript match from gffcompare and abbreviation match
chr3	27713152	27769234	+	LL0000001299	arhgdig	Rho GDP dissociation inhibitor (GDI) gamma	ENSDARG00000004034.9	394132	ZDB-GENE-040426-1493	partial transcript match; "j" class in gffcompare; abbreviation match	Ens99 gene ID import through exact transcript match from gffcompare and abbreviation match
chr17	25197165	25282670	+	LL0000001300	arhgef10	Rho guanine nucleotide exchange factor (GEF) 10	ENSDARG00000077788.5	334278	ZDB-GENE-030131-6210	Entrez gene ID import through exact transcript match from gffcompare and abbreviation match	Ens99 gene ID import through exact transcript match from gffcompare and abbreviation match
chr11	29331142	29563437	+	LL0000001301	arhgef10la	Rho guanine nucleotide exchange factor (GEF) 10-like a	ENSDARG00000088630.3	799435	ZDB-GENE-120814-1	Entrez gene ID import through exact transcript match from gffcompare and abbreviation match	Ens99 gene ID import through exact transcript match from gffcompare and abbreviation match
chr23	21544227	21631054	+	LL0000001302	arhgef10lb	Rho guanine nucleotide exchange factor (GEF) 10-like b	ENSDARG00000074244.5	567649	ZDB-GENE-090313-222	partial transcript match; "j" class in gffcompare; abbreviation match	Ens99 gene ID import through exact transcript match from gffcompare and abbreviation match
chr7	5380070	5488270	-	LL0000001303	arhgef11	Rho guanine nucleotide exchange factor (GEF) 11	ENSDARG00000052482.8	565268	ZDB-GENE-070604-1	Entrez gene ID import through exact transcript match from gffcompare and abbreviation match	Ens99 gene ID import through exact transcript match from gffcompare and abbreviation match
chr15	22446123	22538843	+	LL0000001304	arhgef12a	Rho guanine nucleotide exchange factor (GEF) 12a	ENSDARG00000030532.8	562455	ZDB-GENE-121017-3	Entrez gene ID import through exact transcript match from gffcompare and abbreviation match	Ens99 gene ID import through exact transcript match from gffcompare and abbreviation match
chr5	58695838	58832332	-	LL0000001305	arhgef12b	Rho guanine nucleotide exchange factor (GEF) 12b	ENSDARG00000100913.2	571031	ZDB-GENE-070705-36	Entrez gene ID import through exact transcript match from gffcompare and abbreviation match	Ens99 gene ID import through exact transcript match from gffcompare and abbreviation match
chr5	54110853	54160809	-	LL0000001306	arhgef15	Rho guanine nucleotide exchange factor (GEF) 15	ENSDARG00000100293.2	101882903	ZDB-GENE-060526-292	partial transcript match; "j" class in gffcompare; abbreviation match	Ens99 gene ID import through exact transcript match from gffcompare and abbreviation match
chr8	47098932	47143911	+	LL0000001307	arhgef16	Rho guanine nucleotide exchange factor (GEF) 16	ENSDARG00000077114.5	567180	ZDB-GENE-081104-446	Entrez gene ID import through exact transcript match from gffcompare and abbreviation match	Ens99 gene ID import through exact transcript match from gffcompare and abbreviation match
chr18	2681241	2827873	-	LL0000001308	ARHGEF17	si:ch211-248g20.5 [Source:ZFIN;Acc:ZDB-GENE-091204-478]	ENSDARG00000101644.3	100002227		Ens99 gene ID import through exact transcript match from gffcompare; abbrev conflict matches ZFIN alias	Ens99 gene ID import through exact transcript match from gffcompare and abbreviation match
chr2	37504046	37537982	-	LL0000001309	arhgef18a	rho/rac guanine nucleotide exchange factor (GEF) 18a	ENSDARG00000011157.9	407987	ZDB-GENE-040516-14	Entrez gene ID import through exact transcript match from gffcompare and abbreviation match	Ens99 gene ID import through exact transcript match from gffcompare and abbreviation match
chr22	10810660	10891213	-	LL0000001310	arhgef18b	rho/rac guanine nucleotide exchange factor (GEF) 18b	ENSDARG00000042308.10	562264	ZDB-GENE-070705-462	Entrez gene ID import through exact transcript match from gffcompare and abbreviation match	Ens99 gene ID import through exact transcript match from gffcompare and abbreviation match
chr23	24140043	24148646	-	LL0000001311	arhgef19	Rho guanine nucleotide exchange factor (GEF) 19	ENSDARG00000078853.6	569202	ZDB-GENE-090313-243	partial transcript match; "j" class in gffcompare; abbreviation match	Ens99 gene ID import through exact transcript match from gffcompare and abbreviation match
chr19	11039512	11106315	-	LL0000001312	arhgef1a	Rho guanine nucleotide exchange factor (GEF) 1a	ENSDARG00000040380.8	368266	ZDB-GENE-030722-5	Entrez gene ID import through exact transcript match from gffcompare and abbreviation match	Ens99 gene ID import through exact transcript match from gffcompare and abbreviation match
chr16	26140895	26232655	-	LL0000001313	arhgef1b	Rho guanine nucleotide exchange factor (GEF) 1b	ENSDARG00000055837.8	557983	ZDB-GENE-060616-136	Entrez gene ID import through exact transcript match from gffcompare and abbreviation match	Ens99 gene ID import through exact transcript match from gffcompare and abbreviation match
chr16	6864244	6936564	+	LL0000001314	arhgef2	rho/rac guanine nucleotide exchange factor (GEF) 2	ENSDARG00000075819.6	561276	ZDB-GENE-030717-1	Entrez gene ID import through exact transcript match from gffcompare and abbreviation match	Ens99 gene ID import through exact transcript match from gffcompare and abbreviation match
chr6	39255234	39275941	-	LL0000001315	arhgef25b	Rho guanine nucleotide exchange factor (GEF) 25b	ENSDARG00000014465.12	569561	ZDB-GENE-080225-17	Entrez gene ID import through exact transcript match from gffcompare and abbreviation match	Ens99 gene ID import through exact transcript match from gffcompare and abbreviation match
chr5	34827614	34964830	-	LL0000001316	arhgef28	Rho guanine nucleotide exchange factor (GEF) 28 [Source:ZFIN;Acc:ZDB-GENE-060531-28]	ENSDARG00000060415.7	559941	ZDB-GENE-060531-28	Entrez gene ID import through exact transcript match from gffcompare and abbreviation match	geneAbbrev conflict with Ens99 but matches ZFIN alias
chr22	38951478	38996189	+	LL0000001317	arhgef3	Rho guanine nucleotide exchange factor (GEF) 3	ENSDARG00000013834.9	570228	ZDB-GENE-050208-773	Entrez gene ID import through exact transcript match from gffcompare and abbreviation match	Ens99 gene ID import through exact transcript match from gffcompare and abbreviation match
chr17	24667641	24681100	-	LL0000001318	arhgef33	Rho guanine nucleotide exchange factor (GEF) 33	ENSDARG00000097964.2	559216	ZDB-GENE-131121-574	Entrez gene ID import through exact transcript match from gffcompare and abbreviation match	Ens99 gene ID import through exact transcript match from gffcompare and abbreviation match
chr14	24840669	24878411	+	LL0000001319	arhgef37	Rho guanine nucleotide exchange factor (GEF) 37	ENSDARG00000002463.10	101883655	ZDB-GENE-100514-3	Entrez gene ID import through exact transcript match from gffcompare and abbreviation match	Ens99 gene ID import through exact transcript match from gffcompare and abbreviation match
chr1	26411496	26438319	+	LL0000001320	arhgef38	Rho guanine nucleotide exchange factor (GEF) 38	ENSDARG00000079377.7	100317614	ZDB-GENE-090313-83	Entrez gene ID import through exact transcript match from gffcompare and abbreviation match	Ens99 gene ID import through exact transcript match from gffcompare and abbreviation match
chr4	12401146	12477278	-	LL0000001321	arhgef39	Rho guanine nucleotide exchange factor (GEF) 39	ENSDARG00000013476.11	492469	ZDB-GENE-041114-28	Entrez gene ID import through exact transcript match from gffcompare and abbreviation match	Ens99 gene ID import through exact transcript match from gffcompare and abbreviation match
chr23	20668479	20684466	+	LL0000001322	arhgef3l	Rho guanine nucleotide exchange factor (GEF) 3, like	ENSDARG00000037554.8	553761	ZDB-GENE-050522-85	Entrez gene ID import through exact transcript match from gffcompare and abbreviation match	Ens99 gene ID import through exact transcript match from gffcompare and abbreviation match
chr2	16198334	16359042	-	LL0000001323	arhgef4	Rho guanine nucleotide exchange factor (GEF) 4	ENSDARG00000012914.14	559017	ZDB-GENE-070912-575	Entrez gene ID import through exact transcript match from gffcompare and abbreviation match	Ens99 gene ID import through exact transcript match from gffcompare and abbreviation match
chr7	73488035	73571518	+	LL0000001324	arhgef40	Rho guanine nucleotide exchange factor (GEF) 40	ENSDARG00000078979.4	100151026	ZDB-GENE-110623-2	Entrez gene ID import through exact transcript match from gffcompare and abbreviation match	Ens99 gene ID import through exact transcript match from gffcompare and abbreviation match
chr16	17610982	17635594	+	LL0000001325	arhgef5	Rho guanine nucleotide exchange factor (GEF) 5		100537160	ZDB-GENE-130530-800	Entrez gene ID import through exact transcript match from gffcompare and abbreviation match	no overlapping transcript based on gffcompare
chr14	31799786	31856819	-	LL0000001326	arhgef6	Rac/Cdc42 guanine nucleotide exchange factor (GEF) 6	ENSDARG00000006683.11	558288	ZDB-GENE-101013-2	Entrez gene ID import through exact transcript match from gffcompare and abbreviation match	Ens99 gene ID import through exact transcript match from gffcompare and abbreviation match
chr9	21535370	21570566	+	LL0000001327	arhgef7a	Rho guanine nucleotide exchange factor (GEF) 7a	ENSDARG00000006299.11	553493	ZDB-GENE-060322-11	Entrez gene ID import through exact transcript match from gffcompare and abbreviation match	Ens99 gene ID import through exact transcript match from gffcompare and abbreviation match
chr1	45958725	46020725	+	LL0000001328	arhgef7b	Rho guanine nucleotide exchange factor (GEF) 7b	ENSDARG00000073848.4	494081	ZDB-GENE-041212-49	Entrez gene ID import through exact transcript match from gffcompare and abbreviation match	Ens99 gene ID import through exact transcript match from gffcompare and abbreviation match
chr5	21939172	22001053	-	LL0000001329	arhgef9a	Cdc42 guanine nucleotide exchange factor (GEF) 9a	ENSDARG00000061746.8	559868	ZDB-GENE-070705-271	Entrez gene ID import through exact transcript match from gffcompare and abbreviation match	Ens99 gene ID import through exact transcript match from gffcompare and abbreviation match
chr14	9142162	9245070	-	LL0000001330	arhgef9b	Cdc42 guanine nucleotide exchange factor (GEF) 9b	ENSDARG00000078624.5	560923	ZDB-GENE-030131-7745	Entrez gene ID import through exact transcript match from gffcompare and abbreviation match	Ens99 gene ID import through exact transcript match from gffcompare and abbreviation match
chr16	33952837	33987201	+	LL0000001331	arid1aa	AT rich interactive domain 1Aa (SWI-like)	ENSDARG00000101710.2	100141358	ZDB-GENE-080220-35	Entrez gene ID import through exact transcript match from gffcompare and abbreviation match	Ens99 gene ID import through exact transcript match from gffcompare and abbreviation match
chr19	14351560	14438821	+	LL0000001332	arid1ab	AT rich interactive domain 1Ab (SWI-like)	ENSDARG00000101891.2	568161	ZDB-GENE-030131-5725	Entrez gene ID import through exact transcript match from gffcompare and abbreviation match	Ens99 gene ID import through exact transcript match from gffcompare and abbreviation match
chr20	4897996	5052838	-	LL0000001333	arid1b	AT rich interactive domain 1B (SWI1-like)	ENSDARG00000092503.4	569589	ZDB-GENE-030131-4459	Entrez gene ID import through exact transcript match from gffcompare and abbreviation match	Ens99 gene ID import through exact transcript match from gffcompare and abbreviation match
chr4	1646864	1685865	-	LL0000001334	arid2	AT rich interactive domain 2 (ARID, RFX-like)	ENSDARG00000007413.10	566352	ZDB-GENE-030131-6311	Entrez gene ID import through exact transcript match from gffcompare and abbreviation match	Ens99 gene ID import through exact transcript match from gffcompare and abbreviation match
chr11	5681762	5815829	+	LL0000001335	arid3a	AT rich interactive domain 3A (BRIGHT-like)	ENSDARG00000070843.5	562799	ZDB-GENE-140106-97	Entrez gene ID import through exact transcript match from gffcompare and abbreviation match	Ens99 gene ID import through exact transcript match from gffcompare and abbreviation match
chr25	28987953	29074064	-	LL0000001336	arid3b	AT rich interactive domain 3B (BRIGHT-like)	ENSDARG00000104034.2	571249	ZDB-GENE-070209-182	Entrez gene ID import through exact transcript match from gffcompare and abbreviation match	Ens99 gene ID import through exact transcript match from gffcompare and abbreviation match
chr5	41322638	41452581	+	LL0000001337	arid3c	AT rich interactive domain 3C (BRIGHT-like)	ENSDARG00000067729.5	569444	ZDB-GENE-060526-12	Entrez gene ID import through exact transcript match from gffcompare and abbreviation match	Ens99 gene ID import through exact transcript match from gffcompare and abbreviation match
chr17	11377970	11420391	-	LL0000001338	arid4a	AT rich interactive domain 4A (RBP1-like)	ENSDARG00000043873.10	327404	ZDB-GENE-050809-105	Entrez gene ID import through exact transcript match from gffcompare and abbreviation match	Ens99 gene ID import through exact transcript match from gffcompare and abbreviation match
chr8	52377502	52405131	+	LL0000001339	arid5a	AT rich interactive domain 5A (MRF1-like)	ENSDARG00000077120.3	100462698	ZDB-GENE-100525-3	Entrez gene ID import through exact transcript match from gffcompare and abbreviation match	Ens99 gene ID import through exact transcript match from gffcompare and abbreviation match
chr12	8168215	8385837	+	LL0000001340	arid5b	AT-rich interaction domain 5B	ENSDARG00000037196.8	100536827	ZDB-GENE-121214-272	partial transcript match; "j" class in gffcompare; abbreviation match	Ens99 gene ID import through exact transcript match from gffcompare and abbreviation match
chr21	11244068	11252437	+	LL0000001341	arid6	AT-rich interaction domain 6	ENSDARG00000069988.6	572528	ZDB-GENE-070112-1882	Entrez gene ID import through exact transcript match from gffcompare and abbreviation match	Ens99 gene ID import through exact transcript match from gffcompare and abbreviation match
chr18	18879647	18902562	+	LL0000001342	arih1	ariadne ubiquitin-conjugating enzyme E2 binding protein homolog 1 (Drosophila)	ENSDARG00000003616.12	327005	ZDB-GENE-030131-5213	Entrez gene ID import through exact transcript match from gffcompare and abbreviation match	Ens99 gene ID import through exact transcript match from gffcompare and abbreviation match
chr7	13491451	13521459	+	LL0000001343	arih1l	ariadne homolog, ubiquitin-conjugating enzyme E2 binding protein, 1 like	ENSDARG00000036870.7	405859	ZDB-GENE-040426-2395	Entrez gene ID import through exact transcript match from gffcompare and abbreviation match	Ens99 gene ID import through exact transcript match from gffcompare and abbreviation match
chr8	26034572	26057401	+	LL0000001344	arih2	ariadne homolog 2 (Drosophila)	ENSDARG00000012848.10	406417	ZDB-GENE-040426-2158	Entrez gene ID import through exact transcript match from gffcompare and abbreviation match	Ens99 gene ID import through exact transcript match from gffcompare and abbreviation match
chr4	5906958	5913338	-	LL0000001345	arl1	ADP-ribosylation factor-like 1	ENSDARG00000101680.2	436746	ZDB-GENE-040718-175	Entrez gene ID import through exact transcript match from gffcompare and abbreviation match	Ens99 gene ID import through exact transcript match from gffcompare and abbreviation match
chr1	46652615	46654528	+	LL0000001346	arl11	ADP-ribosylation factor-like 11	ENSDARG00000036637.4	324689	ZDB-GENE-030131-3410	Entrez gene ID import through exact transcript match from gffcompare and abbreviation match	Ens99 gene ID import through exact transcript match from gffcompare and abbreviation match
chr14	41293110	41308561	-	LL0000001347	arl13a	ADP-ribosylation factor-like 13A	ENSDARG00000052575.7	793658	ZDB-GENE-040426-1790	Entrez gene ID import through exact transcript match from gffcompare and abbreviation match	Ens99 gene ID import through exact transcript match from gffcompare and abbreviation match
chr1	33668236	33694795	+	LL0000001348	arl13b	ADP-ribosylation factor-like 13b	ENSDARG00000012763.11	286784	ZDB-GENE-021217-3	Entrez gene ID import through exact transcript match from gffcompare and abbreviation match	Ens99 gene ID import through exact transcript match from gffcompare and abbreviation match
chr2	6259631	6263892	-	LL0000001349	arl14	ADP-ribosylation factor-like 14	ENSDARG00000063223.6	556921	ZDB-GENE-070705-288	Entrez gene ID import through exact transcript match from gffcompare and abbreviation match	Ens99 gene ID import through exact transcript match from gffcompare and abbreviation match
chr7	32624684	32629458	-	LL0000001350	arl14ep	ADP-ribosylation factor-like 14 effector protein	ENSDARG00000001210.7	751672	ZDB-GENE-060825-216	Entrez gene ID import through exact transcript match from gffcompare and abbreviation match	Ens99 gene ID import through exact transcript match from gffcompare and abbreviation match
chr5	40294539	40470752	+	LL0000001351	arl15a	ADP-ribosylation factor-like 15a	ENSDARG00000076040.5	567657	ZDB-GENE-070209-3	Entrez gene ID import through exact transcript match from gffcompare and abbreviation match	Ens99 gene ID import through exact transcript match from gffcompare and abbreviation match
chr10	9006574	9089680	-	LL0000001352	arl15b	ADP-ribosylation factor-like 15b	ENSDARG00000057995.7	560030	ZDB-GENE-080813-2	Entrez gene ID import through exact transcript match from gffcompare and abbreviation match	Ens99 gene ID import through exact transcript match from gffcompare and abbreviation match
chr3	50271863	50277961	-	LL0000001353	arl16	ADP-ribosylation factor-like 16	ENSDARG00000059498.6	100037345	ZDB-GENE-070410-114	Entrez gene ID import through exact transcript match from gffcompare and abbreviation match	Ens99 gene ID import through exact transcript match from gffcompare and abbreviation match
chr7	25047219	25049377	-	LL0000001354	arl2	ADP-ribosylation factor-like 2	ENSDARG00000069496.5	449774	ZDB-GENE-041010-19	Entrez gene ID import through exact transcript match from gffcompare and abbreviation match	Ens99 gene ID import through exact transcript match from gffcompare and abbreviation match
chr18	18868713	18875360	-	LL0000001355	arl2bp	ADP-ribosylation factor-like 2 binding protein	ENSDARG00000025383.8	393976	ZDB-GENE-040426-1604	Entrez gene ID import through exact transcript match from gffcompare and abbreviation match	Ens99 gene ID import through exact transcript match from gffcompare and abbreviation match
chr12	33966414	33972798	-	LL0000001356	arl3	ADP-ribosylation factor-like 3 [Source:ZFIN;Acc:ZDB-GENE-030131-7518]	ENSDARG00000071409.4	797451	ZDB-GENE-030131-7518	Entrez gene ID import through exact transcript match from gffcompare and abbreviation match	geneAbbrev conflict with Ens99 but matches ZFIN alias
chr21	33172526	33187913	+	LL0000001357	arl3l1	ADP ribosylation factor like GTPase 3, like 1	ENSDARG00000111106.1	393666	ZDB-GENE-040426-1649	Entrez gene ID import through exact transcript match from gffcompare and abbreviation match	Ens99 gene ID import through exact transcript match from gffcompare and abbreviation match
chr14	909769	917065	+	LL0000001358	arl3l2	ADP ribosylation factor like GTPase 3, like 2	ENSDARG00000015404.9	393692	ZDB-GENE-040426-1678	Entrez gene ID import through exact transcript match from gffcompare and abbreviation match	Ens99 gene ID import through exact transcript match from gffcompare and abbreviation match
chr15	34069746	34074979	+	LL0000001359	arl4aa	ADP-ribosylation factor-like 4aa	ENSDARG00000099918.2	393834	ZDB-GENE-040426-1878	Entrez gene ID import through exact transcript match from gffcompare and abbreviation match	Ens99 gene ID import through exact transcript match from gffcompare and abbreviation match
chr19	31339305	31341850	-	LL0000001360	arl4ab	ADP-ribosylation factor-like 4ab	ENSDARG00000033182.4	338267	ZDB-GENE-030219-167	Entrez gene ID import through exact transcript match from gffcompare and abbreviation match	Ens99 gene ID import through exact transcript match from gffcompare and abbreviation match
chr22	13977735	13981254	+	LL0000001361	arl4ca	ADP-ribosylation factor-like 4Ca	ENSDARG00000057606.4	550444	ZDB-GENE-050417-265	partial transcript match; "j" class in gffcompare; abbreviation match	Ens99 gene ID import through exact transcript match from gffcompare and abbreviation match
chr9	23356774	23358597	-	LL0000001362	arl4cb	ADP-ribosylation factor-like 4Cb	ENSDARG00000032708.4	406531	ZDB-GENE-040426-2382	Entrez gene ID import through exact transcript match from gffcompare and abbreviation match	Ens99 gene ID import through exact transcript match from gffcompare and abbreviation match
chr12	27243059	27245757	+	LL0000001363	arl4d	ADP-ribosylation factor-like 4D	ENSDARG00000045074.5	323573	ZDB-GENE-030131-2293	Entrez gene ID import through exact transcript match from gffcompare and abbreviation match	Ens99 gene ID import through exact transcript match from gffcompare and abbreviation match
chr9	22902865	22918413	-	LL0000001364	arl5a	ADP-ribosylation factor-like 5A	ENSDARG00000018627.9	436611	ZDB-GENE-040718-28	Entrez gene ID import through exact transcript match from gffcompare and abbreviation match	Ens99 gene ID import through exact transcript match from gffcompare and abbreviation match
chr3	16134376	16142057	-	LL0000001365	arl5c	ADP-ribosylation factor-like 5C	ENSDARG00000035719.6	393819	ZDB-GENE-040426-1866	Entrez gene ID import through exact transcript match from gffcompare and abbreviation match	Ens99 gene ID import through exact transcript match from gffcompare and abbreviation match
chr1	34203817	34234178	+	LL0000001366	arl6	ADP-ribosylation factor-like 6	ENSDARG00000032056.8	494134	ZDB-GENE-041219-2	Entrez gene ID import through exact transcript match from gffcompare and abbreviation match	Ens99 gene ID import through exact transcript match from gffcompare and abbreviation match
[truncated: 34,979 more rows]
