# Supplementary material for: An improved zebrafish transcriptome annotation for sensitive and comprehensive detection of cell type-specific genes
Source: eLife. 2020 Aug 24;9:e55792. doi: 10.7554/eLife.55792 (PMC7486121; doi:10.7554/eLife.55792)
Supplement: Figure 3—source data 6. — Gene expression levels were quantified using RSEM with the V4.3 annotation. Median ratio normalized expression values are shown for each sample, along with adjusted p-value and log2 fold change. Matching Ensembl and NCBI gene IDs are included. [file elife-55792-fig3-data6.xlsx]

## Sheet: Sheet1
LLgeneID	ID	EnsdargID	NcbiID	WTkdrl02	WTkdrl04	WTkdrl10	WTneg08	WTneg11	WTneg14	padj	log2FoldChange
LL0000000001	a1cf	ENSDARG00000002968	562916	31.1269	10.6631	5.78336	13.6232	21.3279	19.3368	0.946989	-0.190788
LL0000000002	a2ml	ENSDARG00000056314	100006972	0	52.3463	145.548	22.381	48.4725	206.904	0.876781	-0.489054
LL0000000003	aaas	ENSDARG00000102274	378454	356.014	496.321	812.563	289.006	534.167	384.803	0.586568	0.462857		kdrlpos-enriched	2141
LL0000000004	aacs	ENSDARG00000012468	393984	225.67	160.916	222.66	448.592	375.177	534.663	0.0135451	-1.15685		kdrlneg-enriched	2136
LL0000000005	aadac	ENSDARG00000063621	100148912	142.989	74.642	131.09	134.286	127.968	166.297	0.772958	-0.297406
LL0000000006	aadacl4	ENSDARG00000044802	569798	8.75445	0	2.89168	23.354	15.5112	3.86737	0.526369	-1.87577		kdrlpos-enriched annotated in Ens95/RefSeq	1938
LL0000000007	aadat	ENSDARG00000011410	557979	77.8173	30.0507	83.8588	28.2195	71.7394	61.8779	0.885807	0.24448		kdrlpos-enriched not annotated in Ens95	144
LL0000000008	aagab	ENSDARG00000041170	436696	148.826	212.293	313.266	148.882	152.204	248.478	0.776388	0.295303		kdrlpos-enriched not annotated in RefSeq	119
LL0000000009	aak1a	ENSDARG00000011855	568999	143.962	157.039	218.804	353.23	224.913	147.927	0.595852	-0.482066		kdrlpos-enriched not annotated in either	60
LL0000000010	aak1b	ENSDARG00000077686	100534954	291.815	404.23	315.193	237.433	236.546	207.871	0.309055	0.568609
LL0000000011	aamdc	ENSDARG00000103957	553802	216.916	376.118	162.898	180.021	234.607	179.833	0.718661	0.346655
LL0000000012	aamp	ENSDARG00000045019	405874	854.045	947.081	1097.88	421.346	955.879	899.163	0.671001	0.348804
LL0000000013	aanat1	ENSDARG00000036567	393677	60.3084	44.5913	39.5197	63.2505	63.9838	22.2374	0.980336	-0.04959
LL0000000014	aanat2	ENSDARG00000079802	30685	208.161	198.722	145.548	70.0621	101.792	98.6178	0.0897449	1.03024
LL0000000015	aar2	ENSDARG00000018658	431768	285.006	237.497	177.357	116.77	134.754	186.6	0.325511	0.675654
LL0000000016	aars	ENSDARG00000069142	324940	842.373	916.061	1904.65	1012.01	1267.07	1168.91	0.937961	0.0873166
LL0000000017	aars2	ENSDARG00000107385	792787	159.526	159.947	172.537	90.4969	126.029	128.59	0.479784	0.511579
LL0000000018	aarsd1	ENSDARG00000015747	445178	44.745	29.0813	45.303	45.735	31.9919	50.2758	0.953951	-0.103638
LL0000000019	aasdh	ENSDARG00000022730	570338	56.4176	22.2957	5.78336	37.9503	21.3279	37.7068	0.938797	-0.199072
LL0000000020	aasdhppt	ENSDARG00000037501	619247	116.726	45.5607	65.5448	84.6584	106.64	106.353	0.747796	-0.385743
LL0000000021	aass	ENSDARG00000051816	556229	328.778	259.793	204.346	209.213	189.043	227.208	0.652417	0.3422
LL0000000022	aatf	ENSDARG00000025467	559477	201.352	144.437	274.71	150.828	259.813	250.412	0.941304	-0.091328
LL0000000023	aatka	ENSDARG00000078222	100004850	1922.09	2002.73	1010.16	655.859	533.198	1153.44	0.0788205	1.07498
LL0000000024	aatkb	ENSDARG00000104442	555739	110.89	151.223	603.398	957.516	692.188	1184.38	0.0430008	-1.71121
LL0000000025	abat	ENSDARG00000006031	378968	753.855	828.817	1208.72	1223.17	828.88	1741.28	0.551917	-0.442471
LL0000000026	abca12	ENSDARG00000074749	558335	360.878	300.507	414.474	271.491	561.312	1692.94	0.172812	-1.23122
LL0000000027	abca1a	ENSDARG00000074635	558924	9950.89	7288.74	5624.32	2734.37	3290.32	2771.93	0.000577263	1.37805
LL0000000028	abca1b	ENSDARG00000079009	100136868	334.615	564.177	909.916	335.714	773.622	616.845	0.961743	0.0673881
LL0000000029	abca2	ENSDARG00000013500	100006090	187.734	170.61	314.229	528.385	302.469	535.63	0.0963018	-1.02266
LL0000000030	abca3b	ENSDARG00000100524	564344	1060.26	1330.95	1105.59	1135.59	1047.98	1519.87	0.920132	-0.0828353
LL0000000031	abca4a	ENSDARG00000057169	798993	27.2361	84.3357	108.92	264.679	129.906	72.5131	0.344097	-1.08287
LL0000000032	abca4b	ENSDARG00000062661	555506	44.745	68.8257	85.7866	680.187	422.681	78.3142	0.00484521	-2.56673
LL0000000033	abca5	ENSDARG00000074041	100151075	931.862	1104.12	695.932	660.725	590.396	610.077	0.279094	0.553674
LL0000000034	abcb10	ENSDARG00000061591	100003744	329.751	204.538	163.862	113.851	182.257	194.335	0.558275	0.509383
LL0000000035	abcb11a	ENSDARG00000011573	797269	163.416	180.304	109.884	31.1387	22.2974	18.37	3.26057e-05	2.65938
LL0000000036	abcb11b	ENSDARG00000070078	571189	18.4816	26.1732	74.2198	57.412	43.6253	105.386	0.583091	-0.796001
LL0000000037	abcb4	ENSDARG00000010936	100136865	545.694	795.858	1529.7	31.1387	10.664	40.6073	7.16284e-13	5.12267
LL0000000038	abcb5	ENSDARG00000021787	798527	120.617	120.203	302.663	146.936	162.868	507.592	0.639194	-0.588779
LL0000000039	abcb6a	ENSDARG00000063297	564067	156.607	140.56	81.931	132.34	104.701	91.8499	0.859768	0.204933
LL0000000040	abcb6b	ENSDARG00000074254	100004801	111.862	80.4582	132.053	83.6853	134.754	80.2478	0.928326	0.119052
LL0000000041	abcb7	ENSDARG00000062795	566515	263.606	255.915	437.608	277.329	325.735	292.953	0.926349	0.0952218
LL0000000042	abcb8	ENSDARG00000056672	548340	96.2989	161.886	131.09	180.021	215.218	144.059	0.566412	-0.470259
LL0000000043	abcb9	ENSDARG00000056200	570148	3.89087	79.4889	172.537	90.4969	57.1976	87.0157	0.963244	0.124876
LL0000000044	abcc1	ENSDARG00000104719	100002010	321.969	440.097	224.587	310.414	272.416	217.539	0.730393	0.301874
LL0000000045	abcc10	ENSDARG00000077988	556709	187.734	149.284	106.028	161.532	119.242	73.48	0.772394	0.322681
LL0000000046	abcc12	ENSDARG00000013050	568482	319.051	444.944	256.396	17.5155	42.6558	67.6789	1.07925e-05	2.99641
LL0000000047	abcc13	ENSDARG00000062519	559093	10.6999	31.9894	71.3282	122.609	40.7169	65.7452	0.495715	-1.00631
LL0000000048	abcc2	ENSDARG00000014031	393561	2096.2	2370.12	1842	48.6543	75.6172	201.103	1.409e-11	4.27699
LL0000000049	abcc3	ENSDARG00000096662	323301	989.253	1159.37	773.043	547.847	613.662	632.314	0.120017	0.703742
LL0000000050	abcc4	ENSDARG00000058953	368620	934.781	894.734	399.052	145.963	248.179	236.876	0.00131968	1.82032
LL0000000051	abcc5	ENSDARG00000061233	336147	5326.6	5298.61	5414.19	4310.77	5100.28	6522.31	0.990942	0.00956818
LL0000000052	abcc6a	ENSDARG00000016750	566555	60.3084	86.2745	31.8085	85.6315	66.8921	36.74	0.963237	-0.0853585
LL0000000053	abcc6b.1	ENSDARG00000105403	110439293	52.5267	33.9282	18.314	21.4079	31.0224	24.171	0.793004	0.451602
LL0000000054	abcc6b.2	ENSDARG00000094901	100002917	126.453	105.662	37.5919	59.3582	70.7699	33.8395	0.562853	0.71794
LL0000000055	abcc8	ENSDARG00000051879	553281	127.426	58.1626	127.234	178.075	83.3728	250.412	0.496754	-0.710406
LL0000000056	abcc8b	ENSDARG00000077007	100329706	86.5718	207.447	430.861	184.886	175.471	41.5742	0.512328	0.850862
LL0000000057	abcc9	ENSDARG00000015985	561160	35.0178	64.9482	102.173	92.4431	42.6558	43.5079	0.918971	0.178731
LL0000000058	abcd1	ENSDARG00000074876	566367	106.999	73.6726	36.628	79.793	57.1976	29.0052	0.80013	0.388525
LL0000000059	abcd2	ENSDARG00000059409	100537809	136.18	180.304	160.97	185.859	218.126	131.49	0.870675	-0.165426
LL0000000060	ABCD2_1_of_many	ENSDARG00000099178	101882118	0	28.1119	9.63894	28.2195	24.2363	14.5026	0.784277	-0.826656
LL0000000061	abcd3a	ENSDARG00000104085	406803	377.414	634.941	687.257	435.942	514.778	739.634	0.994197	0.0078852
LL0000000062	abcd3b	ENSDARG00000002947	100170781	535.967	298.568	329.652	364.907	1267.07	77.3473	0.734328	-0.554107
LL0000000063	abcd4	ENSDARG00000061770	767748	235.397	225.865	241.937	150.828	208.432	209.805	0.685992	0.305318
LL0000000064	abce1	ENSDARG00000007216	406324	3076.7	2654.15	3617.49	1399.3	2722.22	1859.24	0.243777	0.644385
LL0000000065	abcf1	ENSDARG00000031795	406467	1856.92	2448.64	2454.07	867.019	1719.81	1608.82	0.225333	0.688048
LL0000000066	abcf2a	ENSDARG00000038785	336770	919.217	932.54	2161.05	646.129	1191.46	663.253	0.387899	0.682211
LL0000000067	abcf2b	ENSDARG00000052331	100000576	16.5362	18.4181	27.9529	53.5197	35.8697	58.9773	0.245474	-1.2377
LL0000000068	abcf3	ENSDARG00000089705	100331227	198.434	65.9176	225.551	86.6046	97.9145	62.8447	0.287632	0.985899
LL0000000069	abcg1	ENSDARG00000063475	556979	102.135	118.264	188.923	837.826	411.047	189.501	0.0175169	-1.81306
LL0000000070	abcg2a	ENSDARG00000100075	735312	9866.26	8391.89	4327.88	69.0891	113.426	260.08	5.55498e-17	5.67323
LL0000000071	abcg2b	ENSDARG00000079361	570453	23.3452	10.6631	2.89168	11.677	12.6029	7.73473	0.950899	0.204656
LL0000000072	abcg2c	ENSDARG00000058574	569858	441.613	649.482	406.763	409.669	595.243	378.035	0.905834	0.115151
LL0000000073	abcg2d	ENSDARG00000016818	735310	75.8719	38.7751	84.8227	184.886	257.874	60.911	0.162483	-1.33627
LL0000000074	abcg4a	ENSDARG00000061047	564842	44.745	21.3263	45.303	202.402	113.426	331.627	0.000567632	-2.53935
LL0000000075	abcg4b	ENSDARG00000078068	794238	16.5362	21.3263	120.487	91.47	109.548	57.0437	0.679993	-0.704417
LL0000000076	abcg5	ENSDARG00000063078	557317	0	5.81626	18.314	10.7039	2.90835	12.5689	0.980646	-0.117373
LL0000000077	abcg8	ENSDARG00000063059	100136850	41.8268	1.93875	0	28.2195	10.664	15.4695	0.942519	-0.312742
LL0000000078	abch1	ENSDARG00000071341	558667	72.9537	140.56	150.367	138.178	127.968	174.998	0.797464	-0.277732
LL0000000079	abhd10a	ENSDARG00000076435	568517	197.461	229.742	102.173	206.294	149.295	244.611	0.876716	-0.181203
LL0000000080	abhd10b		492622	298.624	407.138	287.24	85.6315	210.371	249.445	0.260609	0.864309
LL0000000081	abhd11	ENSDARG00000069501	446169	111.862	215.202	188.923	258.841	241.393	476.653	0.192768	-0.920843
LL0000000082	abhd12	ENSDARG00000071004	767657	541.803	963.56	750.874	425.238	736.783	1203.72	0.959028	-0.0683798
LL0000000083	abhd13	ENSDARG00000059209	561333	318.078	242.344	174.465	155.694	111.487	97.651	0.109816	1.0103
LL0000000084	abhd14a	ENSDARG00000058367	404598	275.279	371.271	281.457	507.95	521.565	508.559	0.113291	-0.728919
LL0000000085	abhd14b	ENSDARG00000100531	393338	174.116	249.13	166.754	77.8468	76.5866	128.59	0.103587	1.05973
LL0000000086	abhd15a	ENSDARG00000078768	560644	373.523	497.29	316.157	248.137	359.666	411.875	0.802877	0.219141
LL0000000087	abhd16a	ENSDARG00000078929	564613	497.058	434.281	728.704	547.847	463.398	536.597	0.911481	0.100985
LL0000000088	abhd17aa	ENSDARG00000091433	322121	203.298	325.71	485.803	559.524	424.619	619.745	0.351518	-0.660323
LL0000000089	abhd17ab	ENSDARG00000043084	100003419	780.119	1087.64	1379.33	705.487	611.723	636.182	0.139317	0.733183
LL0000000090	abhd17b	ENSDARG00000035571	437017	1182.82	1431.77	832.805	312.36	330.583	314.224	3.22387e-06	1.84866
LL0000000091	abhd17c	ENSDARG00000058452	393126	612.811	622.34	654.484	656.833	529.32	761.871	0.960766	-0.0439043
LL0000000092	abhd18	ENSDARG00000101961	503769	35.0178	114.386	135.909	163.478	156.082	144.059	0.505409	-0.700293
LL0000000093	abhd2a	ENSDARG00000025797	393888	4480.33	3735.01	2109	558.551	799.797	783.142	4.72992e-07	2.26935
LL0000000094	abhd2b	ENSDARG00000045804	559290	0	68.8257	57.8336	287.06	125.059	192.401	0.148622	-2.25475
LL0000000095	abhd3	ENSDARG00000018809	447830	283.061	569.993	505.081	435.942	446.917	821.815	0.728665	-0.327867
LL0000000096	abhd4	ENSDARG00000102887	550276	835.564	529.279	485.803	246.191	228.79	261.047	0.00415565	1.33017
LL0000000097	abhd6a	ENSDARG00000060756	799085	0	165.763	431.825	3278.32	2893.81	1048.06	0.286685	-3.59477
LL0000000098	abhd6b	ENSDARG00000070894	558995	20.427	0.969376	19.2779	30.1656	37.8086	26.1047	0.548926	-1.20972
LL0000000099	abhd8a	ENSDARG00000103518	558563	41.8268	3.87751	15.4223	47.6812	19.389	41.5742	0.684893	-0.829886
LL0000000100	abhd8b	ENSDARG00000076620	101883400	137.153	29.0813	113.74	95.3624	81.4339	47.3752	0.843738	0.320723
LL0000000101	abi1a	ENSDARG00000010155	393711	2594.24	2956.6	2046.35	583.851	643.715	628.447	1.75028e-09	2.03325
LL0000000102	abi1b	ENSDARG00000062991	767738	122.562	241.375	147.476	290.952	278.232	563.669	0.0875905	-1.14741
LL0000000103	abi2a	ENSDARG00000058207	767646	216.916	284.027	293.024	341.553	409.108	301.655	0.531335	-0.406388
LL0000000104	abi2b	ENSDARG00000014875	692331	1321.92	1548.09	1352.34	933.189	1209.87	1805.09	0.917285	0.0968623
LL0000000105	abi3a	ENSDARG00000060072	767807	94.3535	54.2851	164.826	264.679	320.888	697.093	0.00561518	-2.03271
LL0000000106	abi3b	ENSDARG00000063283	566059	102.135	116.325	128.198	49.6273	135.723	192.401	0.937961	-0.123964
LL0000000107	abi3bpa	ENSDARG00000062156	101884149	78.79	24.2344	28.9168	222.837	544.831	419.609	1.25873e-05	-3.16989
LL0000000108	abi3bpb	ENSDARG00000071095	100149890	598.221	613.615	1270.41	2699.34	4970.37	3351.07	3.0351e-05	-2.15049
LL0000000109	abl1	ENSDARG00000035187	100000720	3778.03	3839.7	2704.69	1525.8	2636.91	1178.58	0.0852123	0.950522
LL0000000110	abl2	ENSDARG00000013841	570636	313.215	360.608	219.768	251.056	309.255	265.881	0.905726	0.113106
LL0000000111	ablim1a	ENSDARG00000060149	100003558	141.044	128.927	135.909	299.71	50.4114	184.667	0.77596	-0.397892
LL0000000112	ablim1b	ENSDARG00000045064	541550	1699.34	1495.75	1291.62	1840.1	2236.52	2781.6	0.191857	-0.61219
LL0000000113	ablim2	ENSDARG00000055223	568454	1456.16	1457.94	479.055	258.841	189.043	308.422	0.000320099	2.16557
LL0000000114	ablim3	ENSDARG00000088168	566821	200.38	245.252	224.587	849.503	424.619	329.693	0.0394196	-1.25878
LL0000000115	abo	ENSDARG00000019207	563897	47.6631	13.5713	45.303	39.8965	47.5031	22.2374	0.985833	-0.0413198
LL0000000116	abr	ENSDARG00000095180	565190	39.8814	17.4488	0.963894	12.6501	9.69451	0	0.679142	1.38348
LL0000000117	abraa	ENSDARG00000038583	324520	19.4543	24.2344	24.0974	69.0891	73.6783	53.1763	0.0675612	-1.53129
LL0000000118	abrab	ENSDARG00000033854	445477	138.126	74.642	22.1696	151.801	73.6783	76.3805	0.831463	-0.361678
LL0000000119	abracl	ENSDARG00000042876	336650	739.265	972.284	1254.03	322.091	373.239	718.363	0.0751093	1.06883
LL0000000120	abraxas1	ENSDARG00000043339	449820	109.917	152.192	117.595	91.47	121.181	118.922	0.849607	0.195525
LL0000000121	abraxas2	ENSDARG00000098907	406584	216.916	180.304	123.378	173.209	174.501	273.616	0.797591	-0.255254
LL0000000122	abt1	ENSDARG00000043666	553568	140.071	210.355	184.104	123.582	190.012	176.932	0.907691	0.123934
LL0000000123	abtb1	ENSDARG00000063354	100536189	340.451	500.198	384.594	270.518	415.894	381.902	0.815341	0.19772
LL0000000124	abtb2a	ENSDARG00000059751	559451	64.1993	56.2238	60.7253	112.878	85.3117	72.5131	0.523828	-0.5795
LL0000000125	abtb2b	ENSDARG00000062000	100007078	224.698	227.803	183.14	162.505	184.196	130.524	0.568212	0.413539
LL0000000126	acaa1	ENSDARG00000004687	431754	64.1993	211.324	235.19	85.6315	147.357	250.412	0.964468	0.0793068
LL0000000127	acaa2	ENSDARG00000038881	406325	208.161	454.637	739.307	397.019	505.084	442.813	0.965686	0.0601082
LL0000000128	acaca	ENSDARG00000078512	559403	552.503	468.209	617.856	618.882	771.683	929.135	0.359964	-0.501505
LL0000000129	acacb	ENSDARG00000061994	556236	760.664	537.034	565.806	440.808	476.97	419.609	0.374199	0.478591
LL0000000130	acad11	ENSDARG00000045411	393147	163.416	132.805	83.8588	66.1698	111.487	118.922	0.746438	0.357786
LL0000000131	acad8	ENSDARG00000042658	394130	134.235	103.723	189.887	199.482	233.638	313.257	0.230655	-0.802784
LL0000000132	acad9	ENSDARG00000055620	724002	538.885	482.749	362.424	289.979	318.949	495.023	0.678724	0.32619
LL0000000133	acadl	ENSDARG00000088357	394156	534.021	764.838	752.801	569.255	501.206	711.595	0.789999	0.203254
LL0000000134	acadm	ENSDARG00000038900	406283	1010.65	993.611	1373.55	994.493	1117.78	1448.33	0.93118	-0.0760276
LL0000000135	acads	ENSDARG00000030781	445288	148.826	309.231	253.504	154.721	229.76	358.698	0.963777	-0.0627307
LL0000000136	acadsb	ENSDARG00000076780	110437777	0	117.295	166.754	131.367	130.876	79.281	0.930811	-0.265796
LL0000000137	acadvl	ENSDARG00000016687	573723	1101.12	1201.06	1420.78	776.522	936.49	1133.14	0.489466	0.387434
LL0000000138	acana	ENSDARG00000035891	497505	34.0451	144.437	63.617	289.006	293.744	122.789	0.0866637	-1.54309
LL0000000139	acanb	ENSDARG00000045799	559593	57.3903	8.72439	3.85558	82.7122	60.106	20.3037	0.534233	-1.22134
LL0000000140	acap1	ENSDARG00000056346	561771	747.046	722.185	1056.43	128.447	217.157	286.185	6.09837e-05	1.99911
LL0000000141	acap2	ENSDARG00000060783	100124613	368.66	469.178	217.84	44.7619	63.9838	45.4416	4.72167e-07	2.77538
LL0000000142	acap3a	ENSDARG00000075990	322991	872.527	1295.09	591.831	254.948	309.255	291.019	0.000453071	1.68999
LL0000000143	acap3b	ENSDARG00000099240	100009646	106.026	52.3463	108.92	113.851	95.0062	133.424	0.748156	-0.356756
LL0000000144	acat1	ENSDARG00000045888	445290	590.439	464.331	653.52	688.944	488.603	543.365	0.991091	-0.0106035
LL0000000145	acat2	ENSDARG00000007127	30643	9.72717	93.0601	205.309	263.706	236.546	316.157	0.265451	-1.40582
LL0000000146	acbd3	ENSDARG00000042623	406270	662.42	783.256	912.808	532.278	521.565	755.103	0.537045	0.382711
LL0000000147	acbd4	ENSDARG00000027070	406368	0	17.4488	37.5919	29.1926	27.1446	61.8779	0.659599	-1.10265
LL0000000148	acbd5a	ENSDARG00000034883	553674	94.3535	80.4582	92.5338	252.029	119.242	178.866	0.122816	-1.04106
LL0000000149	acbd5b	ENSDARG00000058410	100004736	26.2633	0	3.85558	14.5963	0.969451	1.93368	0.866782	0.783428
LL0000000150	acbd6	ENSDARG00000039456	324090	271.388	196.783	334.471	244.244	238.485	222.374	0.833867	0.186954
LL0000000151	acbd7	ENSDARG00000094730	619256	49.6085	129.896	363.388	358.095	430.436	570.437	0.170782	-1.3237
LL0000000152	accs	ENSDARG00000052124	541510	126.453	65.9176	200.49	216.025	184.196	161.463	0.608102	-0.515666
LL0000000153	acd	ENSDARG00000078055	794664	215.943	235.558	273.746	185.859	174.501	202.07	0.58935	0.366817
LL0000000154	ace	ENSDARG00000079166	565980	2115.66	2432.17	1358.13	169.317	276.293	164.363	6.28643e-13	3.27534
LL0000000155	ace2	ENSDARG00000016918	492331	57.3903	24.2344	44.3391	14.5963	33.9308	219.473	0.537554	-1.0893
LL0000000156	acer1	ENSDARG00000010347	550266	76.8446	47.4994	29.8807	47.6812	26.1752	58.0105	0.896516	0.225824
LL0000000157	acer2	ENSDARG00000077782	100331179	598.221	299.537	116.631	86.6046	52.3503	28.0384	0.00254812	2.60281
LL0000000158	acer3	ENSDARG00000093366	555411	17.5089	30.0507	8.67505	11.677	12.6029	10.6353	0.748347	0.687515
LL0000000159	ache	ENSDARG00000031796	114549	163.416	198.722	476.164	986.708	512.84	1452.2	0.0104774	-1.81598
LL0000000160	acin1a	ENSDARG00000054290	368893	8442.21	8783.52	11998.6	7627.04	9392.04	6218.72	0.587541	0.330696
LL0000000161	acin1b	ENSDARG00000026842	327495	1315.11	1472.48	1896.94	1337.02	1417.34	1253.03	0.72197	0.225256
LL0000000162	ACKR2	ENSDARG00000086314	101887081	1214.92	1264.07	751.837	48.6543	52.3503	26.1047	3.51472e-20	4.66788
LL0000000163	ackr3a	ENSDARG00000062478	100000764	247.07	120.203	116.631	44.7619	40.7169	21.2705	0.00327202	2.18056
LL0000000164	ackr3b	ENSDARG00000058179	561050	5619.38	5859.88	5662.88	1053.85	1754.71	1471.53	2.08438e-08	2.00183
LL0000000165	ackr4a	ENSDARG00000078729	100003167	19.4543	15.51	11.5667	23.354	42.6558	35.7731	0.395468	-1.12943
LL0000000166	ackr4b	ENSDARG00000040133	641390	183.843	117.295	81.931	70.0621	83.3728	91.8499	0.478894	0.643048
LL0000000167	aclya	ENSDARG00000099079	436922	483.44	658.206	481.947	330.849	366.452	522.094	0.535371	0.413004
LL0000000168	aclyb	ENSDARG00000055652	794259	18.4816	14.5406	26.0251	44.7619	54.2892	69.6126	0.1153	-1.5141
LL0000000169	acmsd	ENSDARG00000062549	557166	2.91815	14.5406	37.5919	9.73085	21.3279	35.7731	0.924901	-0.279609
LL0000000170	aco1	ENSDARG00000026376	568448	808.327	961.621	641.953	385.342	455.642	465.051	0.0439927	0.884961
LL0000000171	aco2	ENSDARG00000007294	322670	983.416	1232.08	2564.92	2023.04	1832.26	2232.44	0.689442	-0.34876
LL0000000172	acod1	ENSDARG00000069844	795305	89.4899	80.4582	137.837	75.9006	290.835	35.7731	0.825059	-0.387066
LL0000000173	acot11a	ENSDARG00000058229	554842	6.80902	36.8363	24.0974	17.5155	15.5112	15.4695	0.829955	0.482303
LL0000000174	acot11b	ENSDARG00000042122	641574	180.925	148.315	112.776	36.9772	27.1446	18.37	0.000242305	2.42191
LL0000000175	ACOT12	ENSDARG00000054534	100536873	190.652	239.436	160.006	70.0621	170.623	264.915	0.868687	0.222892
LL0000000176	acot13	ENSDARG00000061728	564010	95.3262	137.651	106.028	51.5735	80.4644	139.225	0.795111	0.321548
LL0000000177	acot14	ENSDARG00000089159	557184	91.4354	125.05	49.1586	142.07	170.623	172.098	0.274721	-0.867959
LL0000000178	acot15	ENSDARG00000045522	557032	233.452	124.08	171.573	188.779	185.165	248.478	0.810184	-0.234379
LL0000000179	acot16	ENSDARG00000069292	402867	17.5089	0	9.63894	13.6232	5.81671	21.2705	0.872904	-0.584683
LL0000000180	acot17	ENSDARG00000088524	572757	9.72717	9.69376	4.81947	26.2733	9.69451	12.5689	0.644244	-1.00176
LL0000000181	acot18	ENSDARG00000033413	556673	93.3808	111.478	81.931	82.7122	118.273	122.789	0.876916	-0.175052
LL0000000182	acot19	ENSDARG00000040427	492778	20.427	39.7444	4.81947	22.381	15.5112	18.37	0.940411	0.207975
LL0000000183	acot20	ENSDARG00000042510	553440	73.9265	158.008	152.295	180.021	152.204	308.422	0.394031	-0.73753
LL0000000184	acot21	ENSDARG00000042513	562047	0	0	1.92779	20.4348	12.6029	6.76789	0.121723	-4.36457
LL0000000185	acot22	ENSDARG00000058945	553217	0	0	0	23.354	17.4501	6.76789	0.0202805	-6.47564
LL0000000186	acot7	ENSDARG00000018653	447878	139.098	61.0707	68.4365	45.735	26.1752	68.6458	0.395326	0.934243
LL0000000187	acot8	ENSDARG00000014138	450052	158.553	93.0601	26.989	43.7888	26.1752	53.1763	0.338234	1.1778
LL0000000188	acot9.1	ENSDARG00000058352	798073	349.205	354.792	261.215	205.321	167.715	271.682	0.36222	0.58214
LL0000000189	acot9.2	ENSDARG00000058390	798008	37.9359	82.397	50.1225	13.6232	12.6029	24.171	0.0880943	1.75786
LL0000000190	acox1	ENSDARG00000014727	449662	581.685	476.933	528.214	548.82	472.123	652.618	0.928058	-0.0767818
LL0000000191	acox3	ENSDARG00000038865	406421	132.289	91.1214	81.931	62.2775	68.831	77.3473	0.543529	0.550598
LL0000000192	acoxl	ENSDARG00000020149	569104	218.861	289.843	202.418	295.818	287.927	314.224	0.628474	-0.336582
LL0000000193	acp1	ENSDARG00000076486	541489	364.769	567.085	438.572	222.837	287.927	295.854	0.146565	0.764657
LL0000000194	acp2	ENSDARG00000007244	503759	25.2906	46.5301	96.3894	72.0083	64.9532	26.1047	0.983814	0.0449923
LL0000000195	acp5a	ENSDARG00000019763	406801	0	48.4688	54.942	51.5735	180.318	80.2478	0.414497	-1.5937
LL0000000196	acp5b	ENSDARG00000101456	436725	10.6999	54.2851	98.3172	18.4886	75.6172	16.4363	0.797263	0.563039
LL0000000197	acp6	ENSDARG00000040064	558758	137.153	94.0295	111.812	53.5197	55.2587	49.3089	0.0967549	1.11745
LL0000000198	acp7	ENSDARG00000102421	571830	92.4081	117.295	49.1586	41.8427	76.5866	46.4084	0.565482	0.65106
LL0000000199	acsbg1	ENSDARG00000062077	100006023	402.705	322.802	187.959	283.168	182.257	289.086	0.780035	0.275776
LL0000000200	acsbg2	ENSDARG00000004094	335159	7082.35	9074.33	3950.04	1091.8	1069.3	1579.82	2.00347e-07	2.42621
LL0000000201	acsf2	ENSDARG00000061201	751707	463.986	355.761	418.33	270.518	427.528	356.765	0.769534	0.2311
LL0000000202	ACSF3	ENSDARG00000059503	562292	147.853	79.4889	79.0393	53.5197	97.9145	75.4136	0.70305	0.433509
LL0000000203	acsl1a	ENSDARG00000030514	555308	427.995	261.732	409.655	389.234	512.84	640.049	0.476735	-0.488237
LL0000000204	acsl1b	ENSDARG00000003854	445175	477.604	478.872	337.363	303.603	429.467	416.709	0.838692	0.17027
LL0000000205	acsl2	ENSDARG00000078399	100332846	36.9632	67.8563	85.7866	221.863	284.049	197.236	0.00199879	-1.88308
LL0000000206	acsl3a	ENSDARG00000032079	567157	151.744	153.161	186.032	107.039	163.837	142.126	0.786726	0.249387
LL0000000207	acsl3b	ENSDARG00000014674	559656	1419.19	1087.64	1310.9	1190.08	1085.78	1361.31	0.929419	0.0698907
LL0000000208	acsl4a	ENSDARG00000004078	393622	986.335	678.563	712.318	923.458	391.658	446.681	0.609392	0.432236
LL0000000209	acsl4b	ENSDARG00000010752	334561	767.473	689.227	507.972	355.176	556.465	358.698	0.281959	0.629059
LL0000000210	acsl5	ENSDARG00000075931	447860	29.1815	13.5713	22.1696	13.6232	9.69451	37.7068	0.974992	0.0891601
LL0000000211	acsm3	ENSDARG00000004880	100002035	131.317	168.671	61.6892	170.29	158.99	120.855	0.785809	-0.315699
LL0000000212	acss1	ENSDARG00000044142	541435	104.081	111.478	181.212	185.859	307.316	190.468	0.277847	-0.784872
LL0000000213	acss2	ENSDARG00000037781	436914	356.014	310.2	594.723	619.855	526.412	668.088	0.428829	-0.52493
LL0000000214	acss2l	ENSDARG00000069029	560020	27.2361	20.3569	11.5667	41.8427	40.7169	21.2705	0.595096	-0.811671
LL0000000215	acss3	ENSDARG00000032218	566019	90.4626	168.671	192.779	193.644	217.157	349.03	0.339591	-0.749598
LL0000000216	acta1a	ENSDARG00000036371	550445	718.838	802.644	406.763	626.667	738.722	307.456	0.850562	0.204983
LL0000000217	acta1b	ENSDARG00000055618	407658	132.289	78.5195	162.898	186.832	106.64	296.82	0.499807	-0.659511
LL0000000218	acta2	ENSDARG00000045180	322509	384.223	253.007	644.845	210.186	365.483	304.555	0.524918	0.54255
LL0000000219	actb1	ENSDARG00000037746	57934	58692.7	101124	100527	32656.7	40097.5	20175.1	0.00214145	1.48622
LL0000000220	actb2	ENSDARG00000037870	57935	166368	185543	188756	58467.8	88412	79716.1	0.000397704	1.25462
LL0000039756	actc1a	ENSDARG00000042535	408256	185.789	113.417	212.057	1047.04	1856.5	1741.28	1.24586e-11	-3.18346
LL0000000222	actc1b	ENSDARG00000099197	58114	470.795	644.635	836.66	1634.78	2248.16	3321.1	8.45683e-05	-1.88377
LL0000000223	actc1c	ENSDARG00000079111	415164	190.652	82.397	10.6028	82.7122	109.548	278.45	0.682764	-0.730814
LL0000000224	actl6a	ENSDARG00000070828	192313	585.575	760.96	1031.37	674.348	736.783	1116.7	0.931789	-0.0882046
LL0000000225	actl6b	ENSDARG00000034107	553775	0	2.90813	9.63894	18.4886	14.5418	52.2094	0.181521	-2.76332
LL0000000226	actn1	ENSDARG00000007219	560400	965.908	1739.06	1799.59	553.685	1203.09	1025.82	0.309806	0.694955
LL0000000227	actn2a		100538165	92.4081	8.72439	3.85558	39.8965	26.1752	32.8726	0.979602	0.0853906
LL0000000228	actn2b	ENSDARG00000071090	641575	49.6085	81.4276	61.6892	454.431	162.868	172.098	0.00463495	-2.03415
LL0000000229	actn3a	ENSDARG00000013755	58037	68.0902	2.90813	21.2057	80.7661	64.9532	109.253	0.344775	-1.46759
LL0000000230	actn3b	ENSDARG00000001431	323320	98.2444	72.7032	70.3643	154.721	137.662	130.524	0.225308	-0.809486
LL0000000231	actn4	ENSDARG00000099786	322221	3133.12	3725.31	1871.88	941.947	653.41	805.379	2.31173e-05	1.86256
LL0000000232	actr1	ENSDARG00000011611	406681	2007.69	2602.78	2349.01	1250.41	1558.88	1997.49	0.294355	0.533901
LL0000000233	actr10	ENSDARG00000038432	393139	331.696	271.425	402.908	412.588	229.76	321.958	0.956761	0.0611389
LL0000000234	actr2a	ENSDARG00000052438	406820	2669.13	3008.94	2844.45	903.023	1109.05	1436.73	0.000520865	1.30518
LL0000000235	actr2b	ENSDARG00000070076	554861	89.4899	45.5607	43.3752	53.5197	42.6558	32.8726	0.72904	0.467383
LL0000000236	actr3	ENSDARG00000091138	406250	4.86358	15.51	45.303	28.2195	19.389	14.5026	0.979108	0.0808447
LL0000000237	actr3b	ENSDARG00000008790	100038776	11.6726	28.1119	48.1947	55.4659	57.1976	29.9721	0.657121	-0.696848
LL0000000238	actr5	ENSDARG00000098235	406809	136.18	158.008	71.3282	82.7122	92.0978	69.6126	0.542077	0.580517
LL0000000239	actr6	ENSDARG00000021370	324822	111.862	172.549	278.565	162.505	203.585	280.384	0.867686	-0.199477
LL0000000240	actr8	ENSDARG00000103610	326866	300.569	303.415	201.454	166.398	175.471	200.136	0.366948	0.571424
LL0000000241	acvr1ba	ENSDARG00000018968	30183	1312.19	1688.65	2140.81	1951.04	1422.18	1782.86	0.996306	-0.00403037
LL0000000242	acvr1bb	ENSDARG00000052142	559222	18.4816	31.9894	31.8085	48.6543	37.8086	20.3037	0.829518	-0.375679
LL0000000243	ACVR1C	ENSDARG00000086172	100331105	22.3725	6.78563	6.74726	71.0352	68.831	22.2374	0.0871133	-2.17496
LL0000000244	acvr1l	ENSDARG00000014986	30615	1097.22	1213.66	1334.03	1106.4	894.803	1027.75	0.638451	0.267074
LL0000000245	acvr2aa	ENSDARG00000011188	553359	1715.87	2097.73	2386.6	1828.43	1721.74	1761.59	0.708052	0.223133
LL0000000246	acvr2ab	ENSDARG00000104700	100331014	735.374	750.297	1078.6	1269.88	1669.39	996.814	0.266273	-0.618199
LL0000000247	acvr2ba	ENSDARG00000044422	30457	793.737	808.46	665.087	885.508	1097.42	880.793	0.540463	-0.336933
LL0000000248	acvr2bb	ENSDARG00000103108	100331938	569.039	522.494	854.01	977.951	592.334	591.707	0.873163	-0.152161
LL0000000249	acvrl1	ENSDARG00000018179	266753	7806.05	9699.58	5286.96	203.375	349.002	358.698	1.00988e-23	4.64482
LL0000000250	acy1	ENSDARG00000111129	393970	181.898	255.915	321.941	226.729	222.004	306.489	0.993927	0.00865722
LL0000000251	acy3.1	ENSDARG00000093003	791456	22.3725	64.9482	91.5699	17.5155	71.7394	82.1815	0.979602	0.0614274
LL0000000252	acy3.2	ENSDARG00000005525	436619	953.262	936.417	500.261	191.698	345.125	316.157	0.00579217	1.48636
LL0000000253	acyp1	ENSDARG00000060126	571263	142.017	248.16	99.2811	153.747	116.334	205.937	0.979108	0.0401254
LL0000000254	acyp2	ENSDARG00000086271	101886626	18.4816	22.2957	37.5919	25.3002	66.8921	11.6021	0.8486	-0.40524
LL0000000255	ada	ENSDARG00000003113	436919	251.934	111.478	106.028	124.555	125.059	238.81	0.971223	-0.0572761
LL0000000256	ada2a	ENSDARG00000051746	373884	271.388	186.12	321.941	276.356	222.974	199.169	0.871491	0.158235
LL0000000257	ada2b	ENSDARG00000015623	559295	0	14.5406	18.314	24.3271	45.5642	29.0052	0.463316	-1.58954
LL0000000258	adad1	ENSDARG00000089181	564818	41.8268	0.969376	11.5667	29.1926	24.2363	16.4363	0.905834	-0.362078
LL0000000259	adad2	ENSDARG00000105626	558824	23.3452	13.5713	0	7.78468	12.6029	4.83421	0.885912	0.549426
LL0000000260	adal	ENSDARG00000012986	619263	101.163	126.988	29.8807	55.4659	54.2892	84.1152	0.782223	0.412351
LL0000000261	adam10a	ENSDARG00000053468	566044	5053.26	6195.28	5526.97	1479.09	1934.05	1974.29	7.25305e-07	1.63868
LL0000000262	adam10b	ENSDARG00000015502	393392	34.0451	19.3875	29.8807	51.5735	40.7169	18.37	0.8137	-0.409443
LL0000000263	adam11	ENSDARG00000079204	567145	90.4626	149.284	170.609	348.365	288.896	876.925	0.00633393	-1.88356
LL0000000264	adam12	ENSDARG00000079068	563275	919.217	905.397	362.424	171.263	238.485	178.866	0.000789232	1.89357
LL0000000265	ADAM12_1_of_many	ENSDARG00000116062	101884222	18.4816	21.3263	20.2418	29.1926	29.0835	16.4363	0.869771	-0.315104
LL0000000266	adam15	ENSDARG00000089213	795199	1306.36	1870.9	1454.52	532.278	550.648	491.156	1.22684e-05	1.55706
LL0000000267	adam17a	ENSDARG00000043213	324142	1497.01	1542.28	784.61	515.735	554.526	718.363	0.0330313	1.09618
LL0000000268	adam17b	ENSDARG00000093093	560657	616.702	684.38	717.137	579.959	457.581	439.913	0.387899	0.449992
LL0000000269	adam19a	ENSDARG00000059693	565342	222.752	246.222	182.176	261.76	434.314	383.836	0.207785	-0.729885
LL0000000270	adam19b	ENSDARG00000067545	571252	12.6453	48.4688	98.3172	206.294	146.387	211.738	0.0593473	-1.82364
LL0000000271	adam22	ENSDARG00000060532	100126805	182.871	606.83	1036.19	2831.68	1102.27	3385.88	0.0137474	-2.00319
LL0000000272	adam23a	ENSDARG00000062323	794175	269.442	278.211	597.614	1251.39	720.302	1816.7	0.00573405	-1.72587
LL0000000273	adam28	ENSDARG00000035514	767749	28.2088	180.304	180.248	144.99	264.66	142.126	0.731408	-0.505144
LL0000000274	adam8a	ENSDARG00000001452	368917	706.192	1014.94	480.983	249.11	222.004	71.5463	0.00287672	2.0208
LL0000000275	adam8b	ENSDARG00000057644	100005593	275.279	281.119	230.371	91.47	101.792	21.2705	0.0178595	1.87481
LL0000000276	adam9	ENSDARG00000010070	447940	236.37	160.916	161.934	102.174	87.2506	42.541	0.0739812	1.26956
LL0000000277	adamts1	ENSDARG00000103519	565145	748.019	980.039	768.224	540.062	722.241	275.55	0.309381	0.698874
LL0000000278	adamts10	ENSDARG00000075188	564734	784.982	1396.87	761.476	227.702	378.086	289.086	0.000532002	1.71768
LL0000000279	adamts12	ENSDARG00000067549	100003937	60.3084	68.8257	68.4365	180.021	222.974	140.192	0.00980159	-1.45904
LL0000000280	adamts13	ENSDARG00000076270	100320289	0	17.4488	7.71115	20.4348	15.5112	24.171	0.642801	-1.25652
LL0000000281	adamts14	ENSDARG00000078494	101886422	20.427	18.4181	10.6028	41.8427	59.1365	29.0052	0.233866	-1.39452
LL0000000282	adamts15a	ENSDARG00000029124	569571	288.897	172.549	97.3533	604.286	785.255	775.407	0.000586568	-1.95401
LL0000000283	adamts15b	ENSDARG00000058252	100002059	99.2171	120.203	93.4977	602.34	735.813	1979.12	2.87665e-08	-3.40616
LL0000000284	adamts16	ENSDARG00000074646	568792	47.6631	27.1425	54.942	115.797	92.0978	179.833	0.0372873	-1.5793
LL0000000285	adamts17	ENSDARG00000075555	101884120	23.3452	6.78563	7.71115	17.5155	21.3279	26.1047	0.701231	-0.779618
LL0000000286	adamts18	ENSDARG00000001999	100150128	112.835	91.1214	184.104	506.004	536.106	365.466	0.000339097	-1.85877
LL0000000287	adamts2	ENSDARG00000075930	571682	55.4448	31.9894	109.884	148.882	213.279	99.5847	0.182336	-1.22645
LL0000000288	adamts3	ENSDARG00000060127	102467218	33.0724	62.0401	111.812	236.46	185.165	123.756	0.0900099	-1.39799
LL0000000289	adamts5	ENSDARG00000100307	565053	155.635	226.834	175.429	195.59	201.646	145.993	0.974494	0.0384643
LL0000000290	adamts6	ENSDARG00000041982	569099	12.6453	30.0507	15.4223	23.354	55.2587	21.2705	0.646099	-0.781251
LL0000000291	ADAMTS7	ENSDARG00000102478	560364	115.753	110.509	61.6892	42.8158	60.106	30.9389	0.208359	1.10507
LL0000000292	adamts8a	ENSDARG00000007709	569618	27.2361	93.0601	26.0251	160.559	193.89	68.6458	0.13917	-1.53185
LL0000000293	adamts9	ENSDARG00000077778	100333407	417.295	644.635	376.883	357.122	446.917	330.66	0.647954	0.342564
LL0000000294	adamtsl2	ENSDARG00000074033	100537087	38.9087	71.7338	78.0754	456.377	1084.82	91.8499	0.00108655	-3.1132
LL0000000295	adamtsl3	ENSDARG00000027903	100534944	108.944	31.02	35.6641	125.528	196.799	86.0489	0.238659	-1.21749
LL0000000296	adamtsl5	ENSDARG00000052118	101886605	38.9087	34.8975	53.9781	52.5466	85.3117	165.33	0.18982	-1.24649
LL0000000297	adamtsl7	ENSDARG00000055439	556634	40.8541	22.2957	28.9168	37.9503	48.4725	26.1047	0.864819	-0.289561
LL0000000298	adap2	ENSDARG00000070565	100331455	751.91	884.071	553.275	51.5735	97.9145	82.1815	9.02911e-12	3.24022
LL0000000299	adar	ENSDARG00000012389	58119	347.26	405.199	525.322	579.959	413.956	554.967	0.705476	-0.277558
LL0000000300	adarb1a	ENSDARG00000041609	58134	1887.07	1356.16	1132.58	338.634	358.697	491.156	7.12231e-06	1.8804
LL0000000301	adarb1b	ENSDARG00000003544	558759	14.5907	44.5913	37.5919	55.4659	31.9919	33.8395	0.85583	-0.325696
LL0000000302	adarb2	ENSDARG00000071823	558149	28.2088	33.9282	25.0612	60.3313	29.0835	14.5026	0.901824	-0.25296
LL0000000303	adat1	ENSDARG00000061348	792614	20.427	77.5501	119.523	118.716	106.64	100.552	0.671001	-0.583315
LL0000000304	adat2	ENSDARG00000041944	100034610	95.3262	68.8257	79.0393	88.5508	109.548	96.6842	0.788118	-0.2776
LL0000000305	adat3	ENSDARG00000005640	368634	90.4626	46.5301	24.0974	37.9503	47.5031	87.9826	0.959028	-0.106723
LL0000000306	adck1	ENSDARG00000062561	100144553	42.7995	40.7138	14.4584	43.7888	38.778	18.37	0.985505	-0.0430763
LL0000000307	adck2	ENSDARG00000073923	572087	36.9632	56.2238	22.1696	85.6315	60.106	29.9721	0.675867	-0.607097
LL0000000308	adck5	ENSDARG00000075405	100001584	147.853	155.1	148.44	114.824	243.332	170.164	0.82768	-0.227052
LL0000000309	adcy1a	ENSDARG00000069026	557026	77.8173	7.75501	16.3862	53.5197	24.2363	41.5742	0.929925	-0.227108
LL0000000310	adcy1b	ENSDARG00000088634	569499	24.3179	30.0507	51.0864	582.878	279.202	126.656	4.12394e-05	-3.22877
LL0000000311	adcy2a	ENSDARG00000058392	563724	0	21.3263	39.5197	64.2236	31.9919	40.6073	0.617488	-1.16885
LL0000000312	adcy2b	ENSDARG00000014588	557902	5110.65	3364.7	2162.01	175.155	129.906	237.843	6.26816e-17	4.29228
LL0000000313	adcy3a	ENSDARG00000077145	571825	89.4899	228.773	202.418	168.344	184.196	227.208	0.900338	-0.154996
LL0000000314	adcy3b	ENSDARG00000017437	564719	1.94543	3.87751	0.963894	28.2195	7.75561	17.4031	0.128667	-2.97578
LL0000000315	adcy5	ENSDARG00000091342	562619	135.208	95.9682	117.595	297.764	234.607	339.361	0.00840735	-1.32163
LL0000000316	adcy6a	ENSDARG00000061445	570652	601.139	653.36	339.291	201.429	156.082	179.833	0.00158283	1.56854
LL0000000317	adcy6b	ENSDARG00000027797	560807	68.0902	117.295	101.209	179.048	261.752	237.843	0.0330313	-1.24361
LL0000000318	adcy7	ENSDARG00000060070	568726	653.666	1105.09	619.784	432.05	422.681	446.681	0.0878497	0.869994
LL0000000319	adcy8	ENSDARG00000031783	100148976	12.6453	60.1013	116.631	171.263	52.3503	182.733	0.434089	-1.10132
LL0000000320	adcy9	ENSDARG00000100869	100333702	533.049	582.595	590.867	308.468	333.491	348.063	0.0539176	0.785514
LL0000000321	adcyap1a	ENSDARG00000004015	259257	60.3084	14.5406	70.3643	45.735	40.7169	152.761	0.664064	-0.720135
LL0000000322	adcyap1b	ENSDARG00000027740	335625	175.089	374.179	306.518	1100.56	771.683	2540.86	0.000220722	-2.36646
LL0000039757	adcyap1r1a	ENSDARG00000105201	541315	124.508	123.111	127.234	839.773	412.986	1665.87	1.98225e-06	-2.9609
LL0000039758	adcyap1r1b	ENSDARG00000053724	555473	28.2088	42.6526	28.9168	425.238	187.104	527.895	2.14603e-08	-3.51448
LL0000000324	add1	ENSDARG00000103962	555511	2555.33	2057.02	1758.14	1081.1	1394.07	1049.02	0.0434807	0.854106
LL0000000325	add2	ENSDARG00000074581	570147	43.7722	111.478	219.768	577.04	212.31	516.293	0.0358207	-1.79963
LL0000000326	add3a	ENSDARG00000040874	556762	4858.72	5508.97	4183.3	2004.56	3481.3	2886.99	0.0846843	0.797324
LL0000000327	add3b	ENSDARG00000056250	553243	63.2266	30.0507	14.4584	92.4431	125.059	234.943	0.0256378	-2.0705
LL0000000328	adgb	ENSDARG00000005595	555435	47.6631	20.3569	30.8446	141.097	73.6783	117.955	0.0292005	-1.75091
LL0000000329	adgra1a	ENSDARG00000054177	560847	147.853	137.651	398.088	263.706	154.143	213.672	0.938619	0.114372
LL0000000330	adgra2	ENSDARG00000076994	560700	3961.87	3766.03	2392.39	1425.57	1321.36	640.049	0.00222182	1.57918
LL0000000331	adgra3	ENSDARG00000073673	100003592	378.387	496.321	575.445	421.346	654.379	522.094	0.873881	-0.139887
LL0000000332	adgrb1a	ENSDARG00000075133	563527	313.215	381.934	525.322	792.091	302.469	848.887	0.407213	-0.671161
LL0000000333	adgrb1b	ENSDARG00000078529	100302472	108.944	238.467	280.493	558.551	403.292	975.543	0.014119	-1.62546
LL0000000334	adgrb2	ENSDARG00000025667	556993	6.80902	57.1932	80.9671	340.58	108.578	64.7784	0.167548	-1.82569
LL0000000335	adgrb3	ENSDARG00000059832	566117	107.972	98.8764	188.923	536.17	198.737	780.241	0.00761243	-1.93668
LL0000000336	adgrd1	ENSDARG00000053344	791731	17.5089	49.4382	33.7363	83.6853	85.3117	67.6789	0.190882	-1.23299
LL0000000337	adgrd2	ENSDARG00000103067	571770	66.1447	10.6631	36.628	132.34	102.762	141.159	0.077605	-1.72995
LL0000000338	adgre10	ENSDARG00000075855	569655	111.862	15.51	365.316	108.012	343.186	482.454	0.583836	-0.922175
LL0000000339	adgre13		100538238	0	2.90813	16.3862	7.78468	15.5112	7.73473	0.862652	-0.685049
LL0000000340	adgre14	ENSDARG00000056062	108182849	0	0	8.67505	13.6232	4.84725	2.90052	0.796021	-1.29992
LL0000000341	adgre15	ENSDARG00000096588	100536619	0	0	0	16.5424	12.6029	4.83421	0.0616316	-5.99018
LL0000000342	adgre16	ENSDARG00000096622	110437794	0	0	2.89168	6.8116	5.81671	7.73473	1	-2.81411
LL0000000343	adgre17	ENSDARG00000095297	110439897	20.427	0	1.92779	17.5155	17.4501	16.4363	0.706406	-1.20161
LL0000000344	adgre19	ENSDARG00000096649		0	0	0	0	0	6.76789	1	-3.6625
LL0000000345	adgre5a	ENSDARG00000026313		0	5.81626	2.89168	10.7039	2.90835	0	1	-0.64416
LL0000000346	adgre5b.2	ENSDARG00000104083	101882660	8.75445	39.7444	5.78336	34.058	14.5418	8.70157	0.980938	-0.0780239
LL0000000347	adgre5b.3	ENSDARG00000112943	792970	329.751	413.924	397.124	268.572	436.253	240.744	0.748852	0.270801
LL0000000348	adgre7	ENSDARG00000041399		43.7722	8.72439	0	3.89234	0	0	0.346709	3.75435
LL0000000350	adgre9	ENSDARG00000096577	101883848	24.3179	2.90813	26.989	38.9234	19.389	26.1047	0.774477	-0.638742
LL0000000352	adgrf3a	ENSDARG00000087870	101886922	0.972717	9.69376	11.5667	34.058	35.8697	34.8063	0.137809	-2.23544
LL0000000353	adgrf3b	ENSDARG00000093008	565465	8.75445	61.0707	11.5667	135.259	45.5642	58.0105	0.280026	-1.55304
LL0000000354	adgrf6	ENSDARG00000091757	565101	104.081	129.896	112.776	132.34	126.029	157.595	0.772214	-0.262557
LL0000000355	adgrf7	ENSDARG00000086445	613165	13.618	9.69376	12.5306	19.4617	12.6029	2.90052	0.991091	0.035942
LL0000000356	adgrf8	ENSDARG00000093316	100537224	0	50.4076	40.4836	56.4389	85.3117	105.386	0.463174	-1.44301
LL0000000357	adgrg1	ENSDARG00000105643	324948	704.247	629.125	948.472	549.793	552.587	644.883	0.515898	0.385112
LL0000000358	adgrg11	ENSDARG00000041413	563883	0	20.3569	25.0612	44.7619	35.8697	98.6178	0.28133	-1.98041
LL0000000359	adgrg2a	ENSDARG00000088137	101882832	11.6726	55.2544	63.617	66.1698	109.548	190.468	0.183401	-1.48793
LL0000000360	adgrg3	ENSDARG00000074782	799479	64.1993	82.397	305.554	80.7661	274.355	89.9163	0.99116	0.0229378
LL0000000361	adgrg4a	ENSDARG00000105416	793963	69.0629	18.4181	1.92779	25.3002	10.664	17.4031	0.777267	0.744346
LL0000000362	adgrg4b	ENSDARG00000094386	100331278	7.78173	27.1425	5.78336	36.9772	17.4501	16.4363	0.710253	-0.799744
LL0000000363	adgrg6	ENSDARG00000054137	561970	876.418	564.177	740.271	872.857	1170.13	733.833	0.613435	-0.348533
LL0000000364	adgrg7.1	ENSDARG00000071088	101882620	0	5.81626	0.963894	16.5424	17.4501	6.76789	0.346709	-2.5877
LL0000000365	adgrg7.2	ENSDARG00000071085		7.78173	2.90813	0	8.75777	0	0	1	0.287668
LL0000000366	adgrl1.1		100334775	6.80902	0	8.67505	29.1926	21.3279	7.73473	0.439419	-1.91136
LL0000000367	adgrl1a	ENSDARG00000089292	562531	269.442	287.905	299.771	298.737	170.623	153.728	0.554505	0.460108
LL0000000368	adgrl2a	ENSDARG00000069356	57987	218.861	445.913	558.095	2060.02	2002.89	1816.7	2.36972e-06	-2.26541
LL0000000369	adgrl2b.1	ENSDARG00000111712	110437953	14.5907	0	0	0	0	1.93368	1	2.91478
LL0000000370	ADGRL3	ENSDARG00000090624		266.524	485.658	309.41	522.547	457.581	572.37	0.388235	-0.548362
LL0000000371	adgrl3.1	ENSDARG00000061121	560631	987.307	763.868	2027.07	1025.63	507.992	500.824	0.237562	0.8931
LL0000000372	adgrl4	ENSDARG00000013653	406676	4111.67	4865.3	2934.09	25.3002	22.2974	49.3089	5.3339e-38	6.94126
LL0000000373	adgrv1	ENSDARG00000021137	415105	138.126	198.722	337.363	1028.55	981.084	811.18	3.9464e-05	-2.06477
LL0000000374	adh5	ENSDARG00000080010	116517	4883.04	3864.9	3377.49	1447.95	2589.4	2160.89	0.0380419	0.968099
LL0000000375	adh8a	ENSDARG00000091211	322482	5.8363	10.6631	3.85558	18.4886	27.1446	38.6737	0.155274	-2.05052
LL0000000376	adh8b	ENSDARG00000024278	402841	354.069	337.343	326.76	156.667	226.852	374.168	0.61308	0.426268
LL0000000377	adhfe1	ENSDARG00000053518	404618	31.1269	84.3357	42.4113	106.066	111.487	75.4136	0.370689	-0.891933
LL0000000378	adi1	ENSDARG00000020448	324079	415.35	974.223	542.672	352.257	476.97	671.955	0.697797	0.364169
LL0000000379	adipoqa	ENSDARG00000062228	562602	0	0	13.4945	7.78468	0.969451	0	1	0.62483
LL0000000380	adipoqb	ENSDARG00000100086	751715	10.6999	15.51	1.92779	24.3271	9.69451	9.66842	0.820392	-0.634926
LL0000000381	adipor1a	ENSDARG00000002912	436740	1191.58	891.826	744.126	1139.48	705.76	818.915	0.929171	0.0858594
LL0000000382	adipor1b	ENSDARG00000042717	406821	405.623	307.292	439.536	345.445	257.874	423.477	0.851409	0.166556
LL0000000383	adipor2	ENSDARG00000101849	560140	7375.14	8546.02	4059.92	1574.45	2384.85	1485.07	7.15595e-05	1.8758
LL0000000384	adka	ENSDARG00000039429	368220	600.166	526.371	831.841	418.427	632.082	481.487	0.614581	0.354257
LL0000000385	adkb	ENSDARG00000095947	322229	60.3084	57.1932	230.371	139.151	114.395	83.1484	0.980623	0.0472334
LL0000000386	adm2a	ENSDARG00000045708	403114	52.5267	100.815	323.868	188.779	292.774	56.0768	0.934342	-0.171915
LL0000000387	adm2b	ENSDARG00000078875	100322075	0	10.6631	7.71115	17.5155	5.81671	0	0.952521	-0.344352
LL0000000388	adma	ENSDARG00000015263	556502	1003.84	1966.86	696.895	69.0891	111.487	153.728	9.20354e-09	3.45554
LL0000000389	admb	ENSDARG00000069027	570100	16.5362	54.2851	59.7614	108.012	201.646	220.44	0.0138362	-2.02115
LL0000000390	admp	ENSDARG00000025372	140619	13.618	21.3263	10.6028	23.354	21.3279	0	0.994075	0.027753
LL0000000391	adnp2a	ENSDARG00000060937	100007394	414.377	310.2	329.652	248.137	222.004	276.517	0.392458	0.497648
LL0000000392	adnp2b	ENSDARG00000028431	564171	999.953	1220.44	1261.74	945.839	1188.55	963.941	0.802263	0.168489
LL0000000393	adnpa	ENSDARG00000062002	564637	990.225	860.806	1762.96	1030.5	1064.46	1295.57	0.928229	0.0920967
LL0000000394	adnpb	ENSDARG00000074293	100330315	282.088	381.934	580.264	682.133	538.045	779.274	0.274151	-0.684254
LL0000000395	adoa	ENSDARG00000042827	494091	81.7082	305.354	265.071	283.168	213.279	192.401	0.959598	-0.0789729
LL0000000396	adob	ENSDARG00000053571	406474	87.5445	145.406	202.418	175.155	191.951	131.49	0.86767	-0.195551
LL0000000397	adora1a	ENSDARG00000070056	100007535	0	2.90813	0.963894	42.8158	37.8086	23.2042	0.00296412	-4.74443
LL0000000398	adora1b	ENSDARG00000075694	100150997	34.0451	159.947	165.79	204.348	88.22	292.953	0.596153	-0.70255
LL0000000399	adora2aa	ENSDARG00000033706	561701	547.639	306.323	222.66	94.3893	62.0449	69.6126	0.000143274	2.25183
LL0000000400	adora2ab	ENSDARG00000058488	566118	1605.96	1487.02	649.665	96.3354	96.9451	140.192	3.53667e-11	3.48837
LL0000000401	adora2b	ENSDARG00000002533	560100	535.967	748.358	592.795	327.93	262.721	327.759	0.0169631	1.03131
LL0000000402	adpgk	ENSDARG00000063525	557919	149.798	131.835	200.49	273.437	184.196	152.761	0.710583	-0.340268
LL0000000403	adpgk2	ENSDARG00000062785	566398	71.0083	67.8563	51.0864	81.7392	78.5255	41.5742	0.956622	-0.0875681
LL0000000404	adprh	ENSDARG00000040712	445059	38.9087	67.8563	78.0754	69.0891	71.7394	116.021	0.682154	-0.47459
LL0000000405	adprhl1	ENSDARG00000041589	450012	4.86358	42.6526	4.81947	53.5197	38.778	44.4747	0.43224	-1.38596
LL0000000406	adprhl2	ENSDARG00000019338	796446	87.5445	119.233	156.151	297.764	271.446	348.063	0.0107007	-1.33759
LL0000000407	adprm	ENSDARG00000026090	393393	23.3452	80.4582	43.3752	44.7619	38.778	30.9389	0.826899	0.362559
LL0000000408	adra1aa	ENSDARG00000028725	798498	293.76	425.556	214.948	105.093	66.8921	73.48	0.000569764	1.92835
LL0000000409	adra1ab	ENSDARG00000027638	557259	20.427	5.81626	53.9781	145.963	158.02	281.351	0.00340909	-2.86693
LL0000000410	adra1ba	ENSDARG00000011317	100149100	87.5445	79.4889	41.4474	77.8468	40.7169	60.911	0.88362	0.216082
LL0000000411	adra1bb	ENSDARG00000041173	492486	44.745	30.0507	27.9529	72.0083	59.1365	84.1152	0.230225	-1.06709
LL0000000412	adra1d	ENSDARG00000024101	568614	1477.56	1464.73	708.462	120.663	146.387	217.539	1.21971e-08	2.91331
LL0000000413	adra2a	ENSDARG00000040841	266750	98.2444	40.7138	93.4977	53.5197	76.5866	88.9494	0.959108	0.0856243
LL0000000414	adra2b	ENSDARG00000102096	266751	94.3535	46.5301	17.3501	127.474	132.815	82.1815	0.319103	-1.11408
LL0000000415	adra2c	ENSDARG00000069669	266752	66.1447	10.6631	14.4584	59.3582	43.6253	124.723	0.36369	-1.31925
LL0000000416	adra2da	ENSDARG00000091277	266754	27.2361	109.54	76.1476	54.4928	57.1976	57.0437	0.82768	0.335634
LL0000000417	adra2db	ENSDARG00000054667	266755	46.6904	2.90813	13.4945	23.354	9.69451	8.70157	0.830983	0.59568
LL0000000418	adrb1	ENSDARG00000007490	557194	257.77	216.171	67.4726	81.7392	60.106	70.5794	0.11213	1.34974
LL0000000419	adrb2a	ENSDARG00000088124	565838	184.816	144.437	127.234	97.3085	93.0673	139.225	0.573398	0.469782
LL0000000420	adrb2b	ENSDARG00000054510	100037315	39.8814	41.6832	6.74726	40.8696	31.9919	14.5026	0.995034	0.0154981
LL0000000421	adrb3a	ENSDARG00000053646	558248	416.323	575.809	446.283	196.563	226.852	328.726	0.0746327	0.935376
LL0000000422	adrb3b	ENSDARG00000052919	792519	19.4543	23.265	13.4945	29.1926	40.7169	15.4695	0.734654	-0.602993
LL0000000423	adrm1	ENSDARG00000058560	796450	1372.5	1619.83	1482.47	562.443	827.911	1071.26	0.0765391	0.862206
LL0000000424	adsl	ENSDARG00000017049	334431	712.029	628.156	574.481	146.936	320.888	259.114	0.00655139	1.39715
LL0000000425	adss	ENSDARG00000002071	550502	74.8992	77.5501	213.021	209.213	228.79	383.836	0.156007	-1.16902
LL0000000426	adssl	ENSDARG00000012399	192305	1096.25	1646	1995.26	735.652	1410.55	1438.66	0.609392	0.402212
LL0000000427	adssl1	ENSDARG00000099517	407989	26.2633	56.2238	53.0142	47.6812	35.8697	35.7731	0.913657	0.183548
LL0000000428	adtrp1	ENSDARG00000037810	550414	234.425	284.997	287.24	160.559	283.08	212.705	0.720504	0.297508
LL0000000429	aebp1	ENSDARG00000091726	793308	109.917	125.05	57.8336	271.491	507.023	199.169	0.0113402	-1.73951
LL0000000430	aebp2	ENSDARG00000006038	406815	622.539	740.603	809.671	556.605	445.947	618.779	0.450626	0.422393
LL0000000431	aep1	ENSDARG00000039099	503710	92.4081	196.783	474.236	53.5197	22.2974	68.6458	0.00868544	2.40181
LL0000000432	aes	ENSDARG00000021805	393395	101.163	182.243	166.754	128.447	180.318	141.159	0.999907	0.000784311
LL0000000433	afap1	ENSDARG00000055284	568356	960.071	1602.38	952.327	746.356	498.298	336.461	0.0449338	1.15251
LL0000000434	afap1l1a	ENSDARG00000089162	566757	390.059	428.464	223.623	136.232	172.562	249.445	0.173754	0.900546
LL0000000435	afap1l1b	ENSDARG00000056453	768144	4836.35	5575.85	2626.61	71.0352	109.548	86.0489	1.02573e-29	5.61179
LL0000000436	afap1l2	ENSDARG00000074806	567369	249.988	325.71	236.154	225.756	284.049	275.55	0.962564	0.0478523
LL0000000437	afdna	ENSDARG00000029472	558359	3417.15	3788.32	2376.96	689.917	825.972	585.906	9.8426e-09	2.18877
LL0000000438	aff1		100537394	0	0	0	31.1387	0	0	0.328481	-5.86417
LL0000000439	aff2	ENSDARG00000052242	100330019	293.76	329.588	471.344	1057.74	692.188	1017.12	0.00373028	-1.33779
LL0000000440	aff3	ENSDARG00000079575	570215	138.126	153.161	147.476	178.075	142.509	95.7173	0.95049	0.0758678
LL0000000441	aff4	ENSDARG00000001857	556421	3410.34	2535.89	2517.69	1584.18	1622.86	1228.86	0.0197479	0.932101
LL0000000442	afg1la	ENSDARG00000011466	561238	78.79	93.0601	116.631	109.959	104.701	130.524	0.797591	-0.258835
LL0000000443	afg1lb	ENSDARG00000042902	555926	265.552	144.437	96.3894	96.3354	144.448	145.993	0.729275	0.388628
LL0000000444	afg3l2	ENSDARG00000062272	569168	311.269	373.21	406.763	297.764	399.414	378.035	0.982977	0.0213558
LL0000000445	afmid	ENSDARG00000099106	550372	157.58	225.865	301.699	162.505	184.196	222.374	0.775482	0.267817
LL0000000446	afp4	ENSDARG00000095863	568707	4.86358	90.152	269.89	41.8427	54.2892	320.991	0.949156	-0.192922
LL0000000447	aftpha	ENSDARG00000069249	556043	577.794	631.064	669.906	511.843	417.833	558.834	0.563796	0.335919
LL0000000448	aftphb	ENSDARG00000071347	100004990	33.0724	28.1119	65.5448	53.5197	19.389	0	0.772205	0.797754
LL0000000449	aga	ENSDARG00000004889	566517	370.605	285.966	417.366	195.59	316.041	351.93	0.704044	0.314523
LL0000000450	agap1	ENSDARG00000062123	100148154	1452.27	1312.54	1850.68	1299.07	760.049	828.583	0.207771	0.676573
LL0000000451	agap2	ENSDARG00000099874	565109	449.395	344.129	907.024	193.644	147.357	549.166	0.337692	0.933845
LL0000000452	agap3	ENSDARG00000087822	324332	285.979	381.934	570.625	843.665	702.852	920.433	0.0556113	-0.994055
LL0000000453	AGBL1	ENSDARG00000104384	100536841	0	24.2344	3.85558	49.6273	31.0224	45.4416	0.287226	-2.16632
LL0000000454	agbl2	ENSDARG00000079983	568152	14.5907	5.81626	4.81947	23.354	22.2974	29.0052	0.321602	-1.56575
LL0000000455	agbl4	ENSDARG00000110838	550450	26.2633	29.0813	13.4945	42.8158	26.1752	37.7068	0.67886	-0.63235
LL0000000456	agbl5	ENSDARG00000045900	445479	139.098	302.445	230.371	198.509	151.234	170.164	0.685992	0.370056
LL0000000457	agfg1a	ENSDARG00000030020	327597	828.755	813.307	1270.41	418.427	514.778	381.902	0.0108457	1.14708
LL0000000458	agfg1b	ENSDARG00000019526	393560	508.731	889.887	640.99	349.338	436.253	639.082	0.462027	0.517648
LL0000000459	aggf1	ENSDARG00000060109	559905	621.566	517.647	453.994	273.437	340.277	303.588	0.0825048	0.796441
LL0000000460	agk	ENSDARG00000009837	334270	181.898	220.048	160.97	156.667	174.501	174.998	0.867913	0.153283
LL0000000461	agla	ENSDARG00000103811	567798	220.807	343.159	303.627	421.346	411.047	557.868	0.218391	-0.680256
LL0000000462	aglb	ENSDARG00000100352	553352	6.80902	13.5713	10.6028	41.8427	24.2363	6.76789	0.519534	-1.23318
LL0000000463	agmat	ENSDARG00000059700	556522	0	0	34.7002	17.5155	10.664	13.5358	0.959974	-0.265364
LL0000000464	agmo	ENSDARG00000025595	405819	105.053	132.805	166.754	251.056	488.603	558.834	0.00305519	-1.6822
LL0000000465	ago1	ENSDARG00000092644	570775	262.633	207.447	324.832	556.605	343.186	389.637	0.243777	-0.697827
LL0000000466	ago2	ENSDARG00000061268	570630	905.599	1225.29	1626.09	1091.8	1346.57	881.76	0.833874	0.178348
LL0000000467	ago3a	ENSDARG00000059888	567622	332.669	288.874	230.371	207.267	229.76	92.8168	0.387899	0.685156
LL0000000468	ago3b	ENSDARG00000063079	568159	532.076	570.963	818.346	417.454	349.972	134.391	0.116512	1.09128
LL0000000469	ago4	ENSDARG00000100854	100535764	1116.68	1194.27	2276.72	1656.19	1555	1260.76	0.974889	0.0368704
LL0000000470	agpat2	ENSDARG00000101139	777624	749.964	574.84	594.723	427.184	603.968	694.192	0.852467	0.153844
LL0000000471	agpat3	ENSDARG00000036549	406734	1374.45	2808.28	2011.65	3012.67	2075.59	1810.89	0.870115	-0.155455
LL0000000472	agpat4	ENSDARG00000069044	406265	999.953	965.499	449.175	241.325	283.08	347.096	0.00653164	1.4702
LL0000000473	agpat5	ENSDARG00000063187	767778	675.065	877.286	595.687	269.545	317.01	413.808	0.0174842	1.10247
LL0000000474	agpat9l	ENSDARG00000006491	567414	9.72717	78.5195	31.8085	20.4348	14.5418	62.8447	0.905608	0.295421
LL0000000475	agps	ENSDARG00000042821	386801	392.978	516.678	645.809	438.861	420.742	626.513	0.949755	0.0658081
LL0000000476	agr1	ENSDARG00000060682	335309	106.999	225.865	153.259	56.4389	135.723	300.688	0.99116	-0.0198632
LL0000000477	agr2	ENSDARG00000070480	335616	367.687	713.461	647.737	1141.43	1455.15	1582.72	0.00787316	-1.2734
LL0000000478	agrn	ENSDARG00000079388	565373	2367.59	2626.04	3334.11	2748.97	2582.62	3277.59	0.955329	-0.0479462
LL0000000479	agrp	ENSDARG00000069089	100149042	14.5907	6.78563	3.85558	27.2464	63.9838	133.424	0.00787316	-3.15495
LL0000000480	agt	ENSDARG00000016412	322485	34.0451	15.51	32.7724	26.2733	35.8697	85.0821	0.570132	-0.838648
LL0000000481	agtpbp1	ENSDARG00000105214	554164	53.4994	34.8975	24.0974	39.8965	26.1752	23.2042	0.845382	0.33347
LL0000000482	agtr1a	ENSDARG00000018616	794575	0	24.2344	0	23.354	5.81671	2.90052	0.9433	-0.404164
LL0000000483	agtr1b	ENSDARG00000045443	100333455	1624.44	1901.92	396.16	46.7081	31.9919	28.0384	8.45005e-13	5.19971
LL0000000484	agtr2	ENSDARG00000035552	503772	1117.65	1033.36	714.246	202.402	424.619	419.609	0.00626816	1.45288
LL0000000485	agtrap	ENSDARG00000077082	793937	42.7995	139.59	91.5699	33.0849	57.1976	46.4084	0.341651	1.00304
LL0000000486	agxt2	ENSDARG00000100709	619269	42.7995	38.7751	63.617	89.5238	101.792	123.756	0.135611	-1.11764
LL0000000487	agxta	ENSDARG00000052099	436603	30.1542	6.78563	108.92	14.5963	10.664	59.9442	0.742445	0.775588
LL0000000488	agxtb	ENSDARG00000018478	79378	57.3903	75.6113	597.614	57.412	95.0062	401.239	0.857017	0.400133
LL0000000489	ahctf1	ENSDARG00000077530	553494	855.991	724.124	1275.23	808.634	1068.33	981.344	0.999907	-0.00148828
LL0000000490	ahcy	ENSDARG00000005191	387530	5904.39	4102.4	7181.01	1763.23	3938.88	2435.47	0.0510937	1.07871
LL0000000491	ahcyl1	ENSDARG00000056331	798918	315.16	415.862	855.938	644.182	735.813	1399.99	0.315567	-0.808791
LL0000000492	ahcyl2	ENSDARG00000039343	394240	255.824	287.905	346.038	313.333	312.163	226.241	0.950128	0.0630605
LL0000000493	ahdc1	ENSDARG00000093453	100536210	66.1447	53.3157	66.5087	340.58	323.797	339.361	1.08031e-08	-2.43223
LL0000000494	ahi1	ENSDARG00000044056	562701	1607.9	1293.15	776.899	604.286	698.974	474.719	0.0454875	1.04866
LL0000000495	ahnak	ENSDARG00000061764	559276	12444	14119.9	9389.29	4125.88	6505.98	5408.51	0.00498761	1.16441
LL0000000496	ahr1a	ENSDARG00000020046	246224	0	0.969376	0.963894	27.2464	7.75561	1.93368	0.146655	-4.2544
LL0000000497	ahr1b	ENSDARG00000023537	554265	312.242	307.292	560.022	389.234	218.126	84.1152	0.446255	0.770548
LL0000000498	ahr2	ENSDARG00000021833	30517	6663.11	6683.85	3457.49	1296.15	1780.88	1458	1.46554e-05	1.88966
LL0000000499	ahrra	ENSDARG00000099702	641291	71.0083	24.2344	37.5919	47.6812	27.1446	24.171	0.801117	0.424183
LL0000000500	ahrrb	ENSDARG00000052618	565319	20.427	0	13.4945	47.6812	29.0835	5.80105	0.643684	-1.28332
LL0000000501	ahsa1a	ENSDARG00000028664	565968	725.647	111.478	257.36	82.7122	254.966	75.4136	0.206078	1.4057
LL0000000502	ahsa1b	ENSDARG00000100317	321945	3623.37	312.139	3177	221.863	1780.88	254.279	0.463129	1.65594
LL0000000503	ahsg1	ENSDARG00000026764	569558	0	2.90813	2.89168	10.7039	4.84725	4.83421	1	-1.81277
LL0000000504	ahsg2	ENSDARG00000069293	567406	10.6999	11.6325	18.314	4.86543	14.5418	10.6353	0.868091	0.436125
LL0000000505	aicda	ENSDARG00000015734	493784	17.5089	9.69376	2.89168	4.86543	7.75561	0	0.727423	1.25368
LL0000000506	aida	ENSDARG00000014532	393763	369.632	381.934	362.424	184.886	177.41	232.042	0.0468117	0.90636
LL0000000507	aif1l	ENSDARG00000009336	321033	415.35	529.279	1010.16	1043.15	1051.85	1532.44	0.159348	-0.891919
LL0000000508	aifm1	ENSDARG00000058088	373125	448.422	614.585	751.837	657.806	856.025	700.96	0.687508	-0.287306
LL0000000509	aifm2	ENSDARG00000077549	557507	417.295	609.738	599.542	266.625	470.184	375.135	0.393897	0.548753
LL0000000510	aifm3	ENSDARG00000062780	100150876	33.0724	9.69376	16.3862	35.0311	37.8086	24.171	0.674047	-0.713834
LL0000000511	aifm4	ENSDARG00000061634	791218	34.0451	71.7338	96.3894	171.263	154.143	301.655	0.0290525	-1.63294
LL0000000512	aifm5	ENSDARG00000075551	557064	0	30.0507	12.5306	83.6853	37.8086	41.5742	0.30968	-1.93706
LL0000000513	aig1	ENSDARG00000007171	562261	12.6453	41.6832	172.537	253.975	64.9532	118.922	0.570374	-0.948462
LL0000000514	aimp1	ENSDARG00000060036	562232	723.701	946.111	987.028	364.907	687.341	600.409	0.230376	0.684919
LL0000000515	aimp2	ENSDARG00000018903	406647	278.197	319.894	352.785	177.102	196.799	262.014	0.330315	0.580414
LL0000000516	aip	ENSDARG00000104437	334795	1402.66	1706.1	2238.16	888.427	1021.8	927.201	0.0294305	0.914131
LL0000000517	aipl1	ENSDARG00000075067	100537095	64.1993	31.9894	45.303	176.128	134.754	48.3421	0.163122	-1.34417
LL0000000518	aipl2	ENSDARG00000098164	100534741	60.3084	126.019	133.017	598.447	517.687	211.738	0.00234419	-2.05585
LL0000000519	aire	ENSDARG00000056784	100007662	3.89087	18.4181	2.89168	13.6232	14.5418	6.76789	0.880473	-0.471144
LL0000000520	ajap1	ENSDARG00000038655	101887016	161.471	213.263	401.944	981.843	654.379	1702.61	0.000754913	-2.10391
LL0000000521	ajuba	ENSDARG00000077842	572549	1067.07	949.989	857.866	495.3	741.63	606.21	0.177319	0.641345
LL0000000522	ak1	ENSDARG00000001950	445486	3271.25	3300.73	1374.51	475.839	602.029	1081.9	0.00151546	1.87943
LL0000000523	ak2	ENSDARG00000005926	321793	4163.23	3455.83	3792.92	1150.19	2851.16	2270.14	0.130174	0.863666
LL0000000524	ak3	ENSDARG00000058226	406404	657.556	650.451	373.027	225.756	328.644	325.826	0.0914276	0.93337
LL0000000525	ak4	ENSDARG00000006546	406590	330.724	325.71	280.493	296.791	262.721	180.799	0.647865	0.339822
LL0000000526	ak5	ENSDARG00000012555	100003595	41.8268	33.9282	39.5197	116.77	93.0673	187.567	0.00913418	-1.78557
LL0000000527	ak5l	ENSDARG00000017739	548336	53.4994	60.1013	52.0503	104.12	96.9451	224.307	0.0726316	-1.36063
LL0000000528	AK6	ENSDARG00000035573	415208	285.006	300.507	403.872	103.147	328.644	385.77	0.8224	0.275189
LL0000000529	ak7a	ENSDARG00000019001	402854	18.4816	38.7751	45.303	102.174	63.9838	72.5131	0.195799	-1.21836
LL0000000530	ak7b	ENSDARG00000017023	504040	27.2361	7.75501	17.3501	50.6004	22.2974	21.2705	0.631691	-0.847299
LL0000000531	ak8	ENSDARG00000030961	553671	7.78173	2.90813	1.92779	27.2464	19.389	29.9721	0.0911318	-2.60278
LL0000000532	ak9	ENSDARG00000021913	557708	46.6904	35.8669	25.0612	59.3582	71.7394	60.911	0.405845	-0.835389
LL0000000533	akap10	ENSDARG00000059549	566920	1063.18	1155.5	951.364	398.965	587.487	724.164	0.0643777	0.889964
LL0000000534	akap11	ENSDARG00000075435	558595	355.042	403.261	377.846	458.323	368.391	587.84	0.645021	-0.316202
LL0000000535	akap12a	ENSDARG00000091792	101885554	284.033	487.596	114.703	186.832	139.601	91.8499	0.230222	1.08338
LL0000000536	akap12b	ENSDARG00000055678	567365	28309.9	27464.4	21089	2592.3	3644.17	2447.08	1.74049e-18	3.14594
LL0000000538	akap17a	ENSDARG00000104768	393655	107.972	239.436	242.901	213.106	203.585	155.661	0.974893	0.0446273
LL0000000539	akap1a	ENSDARG00000089802	100002545	0.972717	7.75501	12.5306	20.4348	12.6029	6.76789	0.75307	-0.904446
LL0000000540	akap1b	ENSDARG00000006062	556208	407.568	327.649	721.957	693.81	757.141	578.171	0.520497	-0.477652
LL0000000541	akap6	ENSDARG00000077295	100002625	75.8719	87.2439	186.032	268.572	167.715	279.417	0.175778	-1.03543
LL0000000542	akap7	ENSDARG00000043843	101885028	793.737	730.91	874.252	247.164	774.591	951.372	0.802263	0.281877
LL0000000543	akap8l	ENSDARG00000099635	406500	3742.04	3699.14	2119.6	1554.99	1846.8	2003.3	0.0897359	0.822804
LL0000000544	akap9	ENSDARG00000079610	565037	746.074	984.886	1084.38	805.715	827.911	1038.39	0.930514	0.0753879
LL0000000545	akip1	ENSDARG00000069037	562301	235.397	138.621	131.09	56.4389	97.9145	101.518	0.19286	0.981074
LL0000000546	akirin1	ENSDARG00000039969	406432	844.318	1184.58	1372.59	832.961	1207.94	1285.9	0.976252	0.0320334
LL0000000547	akirin2	ENSDARG00000058729	406855	727.592	618.462	1437.17	637.371	856.025	522.094	0.570907	0.465642
LL0000000548	akna	ENSDARG00000087110	556113	128.399	68.8257	125.306	342.526	297.621	218.506	0.0150239	-1.41261
LL0000000549	aknad1	ENSDARG00000094414	100003458	13.618	4.84688	7.71115	15.5694	14.5418	10.6353	0.794376	-0.638536
LL0000000550	akr1a1a	ENSDARG00000035257	445326	0.972717	0	17.3501	7.78468	5.81671	7.73473	0.966322	-0.219219
LL0000000551	akr1a1b	ENSDARG00000052030	799805	591.412	766.777	651.592	266.625	544.831	667.121	0.582653	0.44281
LL0000000552	akr1b1	ENSDARG00000006215	415138	172.171	46.5301	118.559	119.689	139.601	211.738	0.689635	-0.482002
LL0000000553	akr7a3	ENSDARG00000016649	436642	332.669	258.823	297.843	215.052	248.179	285.218	0.742099	0.248797
LL0000000554	akt1	ENSDARG00000099657	101910198	109.917	92.0907	41.4474	32.1118	75.6172	62.8447	0.700632	0.513128
LL0000000555	akt1s1	ENSDARG00000074667	566559	908.517	839.48	972.569	898.158	1033.43	1043.22	0.8468	-0.128893
LL0000000556	akt2	ENSDARG00000011219	378972	1696.42	1760.39	1933.57	1111.26	1379.53	1175.68	0.176475	0.555996
LL0000000557	akt2l	ENSDARG00000103612	403146	459.122	651.421	370.135	149.855	213.279	312.29	0.0574225	1.13235
LL0000000558	akt3a	ENSDARG00000104810	560549	77.8173	90.152	150.367	231.594	170.623	126.656	0.373986	-0.732255
LL0000000559	akt3b	ENSDARG00000087205	100149794	861.827	1140.96	812.563	595.528	505.084	513.393	0.0624232	0.80267
LL0000000560	aktip	ENSDARG00000026862	378716	394.923	509.892	632.315	556.605	501.206	501.791	0.983065	-0.0209103
LL0000000561	AL590134.1	ENSDARG00000095161		0	3.87751	2.89168	12.6501	15.5112	9.66842	0.332406	-2.48187
LL0000000562	AL590145.1	ENSDARG00000095967		0	3.87751	53.0142	33.0849	59.1365	124.723	0.389125	-1.93077
LL0000000564	AL590149.1	ENSDARG00000012581	100537549	786.928	769.685	736.415	728.841	564.22	705.794	0.760465	0.198079
LL0000000565	AL590150.1	ENSDARG00000092341		35.9905	8.72439	47.2308	23.354	21.3279	18.37	0.784157	0.544341
LL0000000566	AL590151.1	ENSDARG00000053570	368435	104.081	128.927	29.8807	100.228	102.762	111.187	0.86546	-0.257213
LL0000000567	AL590151.2	ENSDARG00000105320	103908760	1.94543	0	0	7.78468	2.90835	6.76789	1	-3.16787
LL0000000568	AL590152.1	ENSDARG00000110696		27.2361	4.84688	0	5.83851	0	2.90052	0.668648	1.87628
LL0000000569	AL627088.1	ENSDARG00000095600	103909173	20.427	1.93875	1.92779	0.973085	0	0	1	4.54249
LL0000000573	AL627305.1	ENSDARG00000100324	572670	7.78173	5.81626	18.314	56.4389	40.7169	8.70157	0.2943	-1.72958
LL0000000575	AL627305.3	ENSDARG00000102019	101884191	129.371	67.8563	56.8698	66.1698	81.4339	64.7784	0.845377	0.258627
LL0000000576	AL645691.1	ENSDARG00000102561	100536867	0	4.84688	0	10.7039	7.75561	0	1	-1.92925
LL0000000577	AL645691.2	ENSDARG00000102716	100004373	0	30.0507	0	18.4886	0.969451	4.83421	0.960195	0.306977
LL0000000579	AL645792.2	ENSDARG00000103788	101883946	1.94543	7.75501	11.5667	29.1926	2.90835	6.76789	0.779505	-0.869528
LL0000000580	AL732488.1	ENSDARG00000085246	110438942	1325.81	1473.45	1868.99	716.191	992.718	466.984	0.031233	1.10129
LL0000000581	AL732515.1	ENSDARG00000095199		11.6726	69.7951	53.9781	7.78468	9.69451	1.93368	0.0556041	2.80292
LL0000000582	AL732567.1	ENSDARG00000102957		26.2633	64.9482	20.2418	9.73085	7.75561	77.3473	0.934821	0.232821
LL0000000585	AL772146.2	ENSDARG00000105823		0.972717	16.4794	18.314	21.4079	10.664	15.4695	0.893644	-0.410316
LL0000000586	AL772219.1	ENSDARG00000117701		0	2.90813	3.85558	18.4886	7.75561	7.73473	0.406439	-2.32789
LL0000040418	AL772241.2	ENSDARG00000110792		0	28.1119	0	41.8427	5.81671	4.83421	0.84438	-0.900917
LL0000000587	AL772298.1	ENSDARG00000089005		36.9632	48.4688	0	43.7888	0	33.8395	0.978255	0.138161
LL0000000589	AL772300.1	ENSDARG00000097343		51.554	36.8363	0	23.354	22.2974	33.8395	0.965794	0.152966
LL0000000590	AL772300.2	ENSDARG00000117344		8.75445	0	0.963894	7.78468	7.75561	1.93368	1	-0.846824
LL0000000591	AL772314.1	ENSDARG00000097492		61.2811	42.6526	68.4365	59.3582	57.1976	72.5131	0.926388	-0.13339
LL0000000592	AL772362.1	ENSDARG00000097552		57.3903	6.78563	0	11.677	5.81671	0	0.620839	1.87529
LL0000000593	AL772373.1	ENSDARG00000117427		70.0356	3.87751	15.4223	56.4389	5.81671	7.73473	0.914442	0.352101
LL0000000594	AL772382.1	ENSDARG00000097122		13.618	74.642	26.989	42.8158	42.6558	10.6353	0.912965	0.26213
LL0000000595	AL773558.1	ENSDARG00000098223		174.116	33.9282	24.0974	52.5466	43.6253	52.2094	0.708033	0.645595
LL0000000596	AL805905.1	ENSDARG00000112515		0	0	0	17.5155	7.75561	0	1	-5.56297
LL0000000598	AL807749.1	ENSDARG00000095989		0	0	0	17.5155	15.5112	0	0.172566	-5.94914
LL0000000600	AL807792.1	ENSDARG00000096836		50.5813	31.02	18.314	45.735	59.1365	109.253	0.335462	-1.0999
LL0000000602	AL808129.1	ENSDARG00000097262		73.9265	60.1013	368.208	252.029	118.273	337.428	0.758446	-0.494773
LL0000000604	AL831726.1	ENSDARG00000086880	101883469	38.9087	6.78563	31.8085	22.381	15.5112	20.3037	0.852835	0.413338
LL0000000605	AL831726.2	ENSDARG00000104185	101882696	73.9265	2.90813	8.67505	11.677	2.90835	9.66842	0.436441	1.8178
LL0000000606	AL831726.3	ENSDARG00000117226		0	3.87751	0	4.86543	0	12.5689	1	-2.1689
LL0000000607	AL831745.1	ENSDARG00000039423	368914	31.1269	15.51	33.7363	37.9503	22.2974	72.5131	0.641862	-0.72406
LL0000000608	AL831745.2	ENSDARG00000094022	110440182	47.6631	0	2.89168	5.83851	31.0224	25.1379	0.945917	-0.294611
LL0000000609	AL831745.3	ENSDARG00000101436		0	1.93875	0	12.6501	9.69451	5.80105	0.244442	-3.86008
LL0000000610	AL831768.1	ENSDARG00000100923	100534861	14.5907	22.2957	15.4223	15.5694	7.75561	10.6353	0.769534	0.6233
LL0000000611	AL833789.1	ENSDARG00000096811		44.745	5.81626	8.67505	11.677	14.5418	17.4031	0.870097	0.441172
LL0000000612	AL840638.1	ENSDARG00000098608		435.777	702.798	700.751	498.22	666.013	744.468	0.959117	-0.0534083
LL0000000614	AL844141.1	ENSDARG00000096964		0	23.265	21.2057	50.6004	22.2974	24.171	0.65376	-1.12594
LL0000000617	AL844186.1	ENSDARG00000114351		62.2539	0	0	0.973085	5.81671	2.90052	0.495715	2.68334
LL0000000618	AL844192.1	ENSDARG00000100356	103909157	13.618	22.2957	16.3862	11.677	0	7.73473	0.591573	1.43002
LL0000000619	AL844518.1	ENSDARG00000111211	100150820	58.363	42.6526	14.4584	15.5694	19.389	14.5026	0.391499	1.22308
LL0000000621	AL845295.1	ENSDARG00000096435		0	0	6.74726	0	9.69451	0.966842	1	-0.659587
LL0000000625	AL845320.1	ENSDARG00000092847		1.94543	0	0	11.677	4.84725	6.76789	1	-3.58385
LL0000000626	AL845320.2	ENSDARG00000114981	101884880	213.025	148.315	115.667	147.909	156.082	118.922	0.873095	0.173609
LL0000000627	AL845324.1	ENSDARG00000023609		0	75.6113	91.5699	119.689	52.3503	190.468	0.617932	-1.11653
LL0000000629	AL845330.1	ENSDARG00000108467	796214	49.6085	27.1425	3.85558	38.9234	43.6253	25.1379	0.855842	-0.41805
LL0000000631	AL845362.1	ENSDARG00000093205	110438043	0	11.6325	0	22.381	21.3279	52.2094	0.220503	-3.04381
LL0000000632	AL845365.1	ENSDARG00000096673		11.6726	2.90813	0	5.83851	5.81671	0.966842	1	0.207896
LL0000000634	AL845369.2	ENSDARG00000095523		0	5.81626	0	2.91926	15.5112	0	1	-1.66399
LL0000000641	AL928650.1	ENSDARG00000079332	101883376	19.4543	9.69376	2.89168	4.86543	4.84725	0	0.599793	1.72208
LL0000000642	AL928650.2	ENSDARG00000096526		0	0	18.314	0	5.81671	0	1	1.65478
LL0000000643	AL928650.3	ENSDARG00000096599	103911855	56.4176	32.9588	176.393	56.4389	135.723	28.0384	0.895501	0.271445
LL0000000644	AL928650.4	ENSDARG00000113858		146.88	153.161	221.696	75.9006	365.483	51.2426	0.968057	0.082846
LL0000000645	AL928657.1	ENSDARG00000097119		62.2539	72.7032	23.1335	77.8468	38.778	22.2374	0.926704	0.187113
LL0000000647	AL928685.1	ENSDARG00000095786	110438265	0	9.69376	4.81947	7.78468	0.969451	4.83421	1	0.0952241
LL0000000648	AL928685.2	ENSDARG00000095907	555502	22.3725	0.969376	24.0974	12.6501	10.664	12.5689	0.897987	0.402826
LL0000000652	AL928707.2	ENSDARG00000098039		16.5362	0	0	0	0.969451	0	1	3.98756
LL0000000653	AL928707.3	ENSDARG00000117700		0	1.93875	0	11.677	0.969451	4.83421	1	-3.17276
LL0000000654	AL928714.1	ENSDARG00000117452	103911738	38.9087	31.9894	2.89168	96.3354	31.0224	40.6073	0.498046	-1.18682
LL0000000658	AL928808.1	ENSDARG00000101333		77.8173	91.1214	39.5197	192.671	95.0062	57.0437	0.542802	-0.725678
LL0000000659	AL928824.1	ENSDARG00000094456		100.19	88.2132	2.89168	105.093	62.0449	61.8779	0.918039	-0.259713
LL0000000660	AL928824.2	ENSDARG00000096744		122.562	90.152	49.1586	72.0083	73.6783	49.3089	0.728875	0.425369
LL0000000661	AL928824.3	ENSDARG00000096753		54.4721	5.81626	3.85558	76.8737	68.831	33.8395	0.405636	-1.48521
LL0000000662	AL928835.1	ENSDARG00000096583		16.5362	0	2.89168	11.677	0	1.93368	0.933245	0.513428
LL0000000663	AL928845.1	ENSDARG00000093227	795715	0.972717	0	0	26.2733	26.1752	22.2374	0.00243411	-6.16461
LL0000000665	AL928854.1	ENSDARG00000105454		425.077	290.813	119.523	114.824	104.701	200.136	0.258212	0.9932
LL0000000666	AL928866.1	ENSDARG00000095266		29.1815	50.4076	18.314	5.83851	12.6029	1.93368	0.142798	2.26462
LL0000000667	AL928866.2	ENSDARG00000117398		17.5089	0	0	0.973085	0.969451	0	1	3.17233
LL0000000672	AL928908.2	ENSDARG00000097490		75.8719	143.468	167.718	39.8965	129.906	58.0105	0.497021	0.764711
LL0000000673	AL928908.3	ENSDARG00000097636		37.9359	43.6219	33.7363	8.75777	5.81671	39.6405	0.531117	1.08833
LL0000000676	AL928920.3	ENSDARG00000096778		22.3725	2.90813	1.92779	0	0	0	1	5.66779
LL0000000681	AL929009.1	ENSDARG00000096446		14.5907	65.9176	47.2308	47.6812	31.0224	74.4468	0.892576	-0.261704
LL0000000683	AL929017.1	ENSDARG00000074868	100170822	0	0	0	14.5963	0	16.4363	0.189027	-5.85933
LL0000000686	AL929028.1	ENSDARG00000105095		135.208	130.866	99.2811	203.375	132.815	96.6842	0.825828	-0.244633
LL0000000688	AL929048.1	ENSDARG00000117298	103911143	0	16.4794	3.85558	73.9545	29.0835	23.2042	0.170235	-2.63405
LL0000000689	AL929058.1	ENSDARG00000092980		0	11.6325	10.6028	20.4348	15.5112	9.66842	0.735181	-1.03632
LL0000000690	AL929092.1	ENSDARG00000092217		0	11.6325	0	6.8116	0.969451	0	1	0.58033
LL0000000691	AL929105.1	ENSDARG00000105194		0	0	0.963894	10.7039	14.5418	0	1	-4.59975
LL0000000693	AL929114.2	ENSDARG00000101825		0	0.969376	88.6783	77.8468	76.5866	106.353	1	-1.54036
LL0000000694	AL929171.1	ENSDARG00000095920	110439353	0	31.02	19.2779	28.2195	9.69451	20.3037	0.956622	-0.210832
LL0000000696	AL929192.1	ENSDARG00000106684	100535847	0	0	0	13.6232	10.664	19.3368	0.0234149	-6.35072
LL0000000698	AL929210.1	ENSDARG00000094943	101885961	0.972717	0	0	13.6232	7.75561	6.76789	0.143032	-4.75669
LL0000000699	AL929210.2	ENSDARG00000117295		51.554	78.5195	42.4113	115.797	63.9838	87.9826	0.537262	-0.634502
LL0000000700	AL929216.1	ENSDARG00000117377		0	0	0.963894	11.677	17.4501	3.86737	0.110495	-4.98597
LL0000000701	AL929217.1	ENSDARG00000059891	562831	21.3998	0.969376	2.89168	14.5963	9.69451	14.5026	0.850984	-0.619268
LL0000000702	AL929220.1	ENSDARG00000103323		1.94543	4.84688	8.67505	7.78468	15.5112	9.66842	0.681327	-1.09126
LL0000000704	AL929222.2	ENSDARG00000097738		12.6453	21.3263	24.0974	113.851	182.257	321.958	2.37425e-06	-3.41172
LL0000000705	AL929229.1	ENSDARG00000091975		0	0	6.74726	11.677	7.75561	2.90052	0.708907	-1.72584
LL0000000706	AL929237.1	ENSDARG00000094104	100536429	0	14.5406	113.74	16.5424	14.5418	45.4416	0.816828	0.745341
LL0000040393	AL929237.2	ENSDARG00000095450		0	32.9588	22.1696	59.3582	12.6029	10.6353	0.860855	-0.583113
LL0000000707	AL929237.3	ENSDARG00000096676	103909355	0	29.0813	0.963894	41.8427	33.9308	4.83421	0.664131	-1.42377
LL0000000709	AL929243.1	ENSDARG00000096290		26.2633	92.0907	56.8698	118.716	80.4644	63.8115	0.650112	-0.585735
LL0000000712	AL929276.2	ENSDARG00000116984	108181172	46.6904	15.51	6.74726	17.5155	4.84725	14.5026	0.693836	0.903101
LL0000000713	AL929294.1	ENSDARG00000117323		0	2.90813	0	9.73085	7.75561	0	1	-2.58814
LL0000000714	AL929304.1	ENSDARG00000105264		26.2633	58.1626	34.7002	90.4969	50.4114	37.7068	0.673202	-0.584275
LL0000000716	AL929307.1	ENSDARG00000105542		11.6726	0	0	12.6501	0	0.966842	1	-0.222371
LL0000000717	AL929309.1	ENSDARG00000097916		0	2.90813	5.78336	8.75777	2.90835	9.66842	0.742269	-1.2949
LL0000000718	AL929315.1	ENSDARG00000092557		0	4.84688	5.78336	0.973085	0.969451	6.76789	1	0.287352
LL0000000726	AL929378.1	ENSDARG00000117372		0	4.84688	0.963894	10.7039	10.664	8.70157	0.436486	-2.37141
LL0000000727	AL929396.1	ENSDARG00000096530		45.7177	1.93875	10.6028	39.8965	12.6029	18.37	0.928993	-0.282783
LL0000000728	AL929435.1	ENSDARG00000097234		90.4626	91.1214	156.151	253.975	222.974	118.922	0.308086	-0.819011
LL0000000731	AL929457.1	ENSDARG00000095483		26.2633	24.2344	14.4584	65.1967	35.8697	46.4084	0.286532	-1.18305
LL0000000732	AL929457.2	ENSDARG00000098067		0	0	0	7.78468	12.6029	0.966842	1	-5.32005
LL0000000733	AL929493.1	ENSDARG00000093575		0	0	5.78336	5.83851	5.81671	0	1	-1.01033
LL0000000734	AL929493.2	ENSDARG00000117535	110438403	17.5089	5.81626	0.963894	17.5155	7.75561	6.76789	0.911219	-0.399789
LL0000000736	AL929520.2	ENSDARG00000095426		0	0	0	5.83851	15.5112	0	1	-5.31974
LL0000000737	AL929520.3	ENSDARG00000115525		37.9359	0	0	2.91926	0.969451	0	0.508864	3.28661
LL0000000739	AL929536.3	ENSDARG00000113274		20.427	8.72439	99.2811	23.354	68.831	58.9773	0.926574	-0.234965
LL0000000742	AL929576.1	ENSDARG00000095566		47.6631	0	4.81947	23.354	4.84725	2.90052	0.849866	0.754855
LL0000000743	AL929586.1	ENSDARG00000098634		19.4543	0	8.67505	8.75777	9.69451	2.90052	0.928008	0.39763
LL0000000744	AL935044.1	ENSDARG00000088051	100537716	0	5.81626	0	22.381	12.6029	3.86737	0.425999	-2.7399
LL0000000746	AL935044.3	ENSDARG00000104428	564387	9.72717	22.2957	2.89168	62.2775	10.664	10.6353	0.575708	-1.25931
LL0000000747	AL935044.4	ENSDARG00000104677	103910210	0	0	0	2.91926	7.75561	13.5358	1	-5.50128
LL0000000748	AL935053.1	ENSDARG00000105513		39.8814	41.6832	22.1696	49.6273	52.3503	45.4416	0.697797	-0.507147
LL0000000749	AL935065.1	ENSDARG00000099693	567472	35.9905	14.5406	34.7002	6.8116	4.84725	23.2042	0.475597	1.28946
LL0000000750	AL935115.1	ENSDARG00000097120		22.3725	123.111	127.234	319.172	55.2587	127.623	0.554473	-0.880351
LL0000000753	AL935126.2	ENSDARG00000111309		0	1.93875	0	47.6812	19.389	13.5358	0.0107367	-5.37823
LL0000000754	AL935144.1	ENSDARG00000093040		0	0	0.963894	14.5963	0.969451	2.90052	1	-4.14853
LL0000000755	AL935145.1	ENSDARG00000096400	103909307	6.80902	3.87751	6.74726	2.91926	5.81671	3.86737	0.900481	0.468033
LL0000000757	AL935153.1	ENSDARG00000092042	103911520	107.972	8.72439	13.4945	0	0	3.86737	0.0250414	5.07148
LL0000000758	AL935166.1	ENSDARG00000095991		210.107	197.753	165.79	101.201	114.395	205.937	0.620009	0.444453
LL0000000759	AL935174.2	ENSDARG00000112088	563626	315.16	303.415	297.843	334.741	267.568	311.323	0.995733	0.0043935
LL0000000760	AL935174.3	ENSDARG00000115129		0	0	6.74726	13.6232	7.75561	2.90052	0.67886	-1.84635
LL0000000761	AL935174.5	ENSDARG00000117464	563381	1073.88	776.47	816.418	483.623	542.892	582.039	0.0985135	0.729311
LL0000000763	AL935184.1	ENSDARG00000070039	110439814	44.745	2.90813	5.78336	2.91926	0.969451	0	0.162652	3.7814
LL0000000764	AL935184.2	ENSDARG00000095408	101883053	35.9905	4.84688	21.2057	29.1926	22.2974	22.2374	0.92155	-0.248982
LL0000000765	AL935186.1	ENSDARG00000025046		0	6.78563	0	14.5963	10.664	1.93368	0.644056	-2.00278
LL0000000767	AL935186.6	ENSDARG00000112275		27.2361	94.0295	196.634	211.159	93.0673	18.37	0.993265	-0.0210534
LL0000000768	AL935186.9	ENSDARG00000113671	110438638	1135.16	2643.49	3290.73	1505.36	1700.42	768.639	0.27527	0.83085
LL0000000769	AL935195.1	ENSDARG00000110728		13.618	10.6631	0	2.91926	4.84725	9.66842	0.914002	0.477487
LL0000000770	AL935198.1	ENSDARG00000092975		0	4.84688	3.85558	16.5424	0	17.4031	0.628062	-1.96342
LL0000000772	AL935199.1	ENSDARG00000077746	100001479	17.5089	54.2851	11.5667	47.6812	33.9308	41.5742	0.754826	-0.563455
LL0000000773	AL935269.1	ENSDARG00000117790		10.6999	9.69376	0	5.83851	5.81671	2.90052	0.915477	0.486368
LL0000000774	AL935279.1	ENSDARG00000071407		12.6453	4.84688	0	17.5155	21.3279	6.76789	0.644145	-1.38312
LL0000000777	AL935294.2	ENSDARG00000104739		0	0.969376	8.67505	25.3002	15.5112	17.4031	0.284996	-2.59244
LL0000000778	AL935295.1	ENSDARG00000092636	101885157	125.48	43.6219	58.7975	126.501	38.778	76.3805	0.965246	-0.0846002
LL0000000779	AL935295.2	ENSDARG00000117663		479.549	216.171	118.559	378.53	210.371	141.159	0.921934	0.157495
LL0000000782	AL935300.2	ENSDARG00000097519		0	28.1119	11.5667	13.6232	24.2363	11.6021	0.933245	-0.317868
LL0000000783	AL935300.3	ENSDARG00000098661	101885450	69.0629	66.887	73.256	100.228	80.4644	94.7505	0.675094	-0.396806
LL0000000793	AL953866.1	ENSDARG00000096884		18.4816	0.969376	0	0.973085	10.664	0	0.90517	0.740905
LL0000000794	AL953867.1	ENSDARG00000070885	100307083	51.554	31.02	2.89168	37.9503	24.2363	0	0.899984	0.458746
LL0000000795	AL953867.2	ENSDARG00000095689		0	0	0	5.83851	15.5112	0	1	-5.31974
LL0000000796	AL953875.1	ENSDARG00000117502		5.8363	4.84688	0.963894	25.3002	14.5418	13.5358	0.25593	-2.19684
LL0000000797	AL953886.1	ENSDARG00000101745		1.94543	0	10.6028	7.78468	4.84725	10.6353	0.829963	-0.890305
LL0000000800	AL953894.1	ENSDARG00000093393	103909137	68.0902	17.4488	13.4945	36.9772	15.5112	5.80105	0.732804	0.764714
LL0000000801	AL953896.1	ENSDARG00000092472		9.72717	14.5406	5.78336	28.2195	15.5112	12.5689	0.656706	-0.905746
LL0000000802	AL953903.1	ENSDARG00000095012		0	9.69376	0	1.94617	0	0	1	2.31698
LL0000000803	AL953903.2	ENSDARG00000095151		18.4816	7.75501	0	0	4.84725	2.90052	0.697092	1.75934
LL0000000805	AL953907.1	ENSDARG00000094823	792450	0	5.81626	6.74726	35.0311	0.969451	7.73473	0.59756	-1.79909
LL0000000806	AL953907.2	ENSDARG00000113960		93.3808	78.5195	57.8336	41.8427	19.389	14.5026	0.0960113	1.6011
LL0000000807	AL953910.1	ENSDARG00000103508		25.2906	10.6631	0	8.75777	0	5.80105	0.766227	1.3042
LL0000000808	AL954129.1	ENSDARG00000105524	103911374	11.6726	0.969376	0	20.4348	7.75561	11.6021	0.614044	-1.65487
LL0000000809	AL954134.1	ENSDARG00000092078	101882305	0.972717	47.4994	26.989	52.5466	9.69451	14.5026	0.994242	-0.024159
LL0000000813	AL954138.1	ENSDARG00000117322	101884073	0	7.75501	1.92779	19.4617	5.81671	5.80105	0.620452	-1.68227
LL0000000814	AL954142.1	ENSDARG00000092288	564963	0	26.1732	21.2057	16.5424	2.90835	6.76789	0.810182	0.853868
LL0000000815	AL954142.2	ENSDARG00000095277		17.5089	0.969376	8.67505	13.6232	12.6029	1.93368	0.990362	-0.0524932
LL0000000816	AL954142.3	ENSDARG00000117430		69.0629	36.8363	0	27.2464	12.6029	10.6353	0.704679	1.06876
LL0000000817	AL954145.1	ENSDARG00000094110		10.6999	0	0	1.94617	7.75561	0	1	0.141036
LL0000000818	AL954145.2	ENSDARG00000117560		0	6.78563	6.74726	6.8116	2.90835	10.6353	0.893779	-0.588676
LL0000000819	AL954146.1	ENSDARG00000038891	560023	11.6726	81.4276	30.8446	55.4659	129.906	84.1152	0.405482	-1.12051
LL0000000821	AL954149.2	ENSDARG00000094185		103.108	53.3157	36.628	15.5694	47.5031	43.5079	0.528359	0.856868
LL0000000823	AL954191.1	ENSDARG00000117407	101885516	53.4994	92.0907	84.8227	58.3851	113.426	200.136	0.534143	-0.69089
LL0000000824	AL954317.1	ENSDARG00000095834		19.4543	0	0	5.83851	0.969451	0	1	1.51493
LL0000000826	AL954322.2	ENSDARG00000097072	101882098	135.208	221.987	111.812	116.77	116.334	93.7836	0.551921	0.520808
LL0000000827	AL954322.3	ENSDARG00000097266	101886962	127.426	285.966	355.677	253.002	165.776	166.297	0.704032	0.394554
LL0000000828	AL954327.1	ENSDARG00000091368	567978	75.8719	33.9282	41.4474	32.1118	50.4114	16.4363	0.688312	0.61198
LL0000000829	AL954359.1	ENSDARG00000093646	103911997	108.944	98.8764	17.3501	125.528	142.509	202.07	0.349428	-1.06209
LL0000000830	AL954361.1	ENSDARG00000078364	570571	24.3179	13.5713	19.2779	20.4348	26.1752	11.6021	0.991167	-0.0261151
LL0000000831	AL954387.1	ENSDARG00000097221		0	0.969376	26.0251	18.4886	15.5112	10.6353	0.853236	-0.725091
LL0000000832	AL954655.1	ENSDARG00000052626		6.80902	55.2544	0	55.4659	2.90835	0	0.98783	0.0884802
LL0000000833	AL954655.2	ENSDARG00000092719		0	0.969376	13.4945	13.6232	33.9308	7.73473	0.514714	-1.9338
LL0000000834	AL954666.1	ENSDARG00000097918		0	1.93875	0.963894	0.973085	0	11.6021	1	-2.115
LL0000000835	AL954669.1	ENSDARG00000097096		134.235	24.2344	40.4836	112.878	75.6172	65.7452	0.837702	-0.353843
LL0000000836	AL954672.1	ENSDARG00000105627		14.5907	0.969376	3.85558	9.73085	7.75561	6.76789	0.935266	-0.321286
LL0000000837	AL954682.1	ENSDARG00000112674		3.89087	15.51	36.628	72.0083	254.966	182.733	0.00267937	-3.18501
LL0000000838	AL954694.1	ENSDARG00000092131	103911097	53.4994	56.2238	45.303	64.2236	59.1365	87.9826	0.682195	-0.447141
LL0000000839	AL954694.2	ENSDARG00000093270		0	2.90813	13.4945	4.86543	7.75561	0	0.952405	0.378488
LL0000000840	AL954695.1	ENSDARG00000053731		0	0	0	9.73085	7.75561	0	1	-5.03172
LL0000000841	AL954695.2	ENSDARG00000079925		24.3179	27.1425	7.71115	15.5694	9.69451	16.4363	0.822548	0.504696
LL0000000842	AL954695.3	ENSDARG00000094127		43.7722	24.2344	3.85558	29.1926	19.389	6.76789	0.891905	0.376606
LL0000000843	AL954696.1	ENSDARG00000078442	100332577	203.298	265.609	251.576	145.963	250.118	199.169	0.7518	0.275461
LL0000000844	AL954696.2	ENSDARG00000117348		24.3179	55.2544	18.314	48.6543	35.8697	16.4363	0.985505	-0.0445651
LL0000000845	AL954698.1	ENSDARG00000098202		0	0	10.6028	1.94617	0	0	1	2.44653
LL0000000847	AL954703.1	ENSDARG00000117314		11.6726	0	0	12.6501	0.969451	4.83421	0.912621	-0.661082
LL0000000849	AL954741.2	ENSDARG00000115737		287.924	151.223	145.548	204.348	179.348	195.302	0.991091	0.0140754
LL0000000850	AL954767.1	ENSDARG00000094503		2.91815	0	47.2308	22.381	10.664	22.2374	0.975872	-0.140362
LL0000000851	AL954831.1	ENSDARG00000097701	110438180	1.94543	19.3875	18.314	6.8116	15.5112	0	0.825592	0.828874
LL0000000852	AL954832.1	ENSDARG00000117648		0	10.6631	1.92779	3.89234	4.84725	0	1	0.526908
LL0000000856	alad	ENSDARG00000100372	550338	173.144	158.008	257.36	172.236	228.79	219.473	0.946547	-0.0763296
LL0000000857	alas1	ENSDARG00000021059	64608	5723.46	6185.59	4468.61	1253.33	2250.1	1673.6	4.58088e-05	1.66153
LL0000000858	alas2	ENSDARG00000038643	64607	293.76	817.184	219.768	454.431	57.1976	120.855	0.404106	1.07313
LL0000000859	alcama	ENSDARG00000026531	30194	478.577	496.321	1141.25	1794.37	2156.06	2383.26	0.00342352	-1.58158
LL0000000860	alcamb	ENSDARG00000058538	323919	115.753	229.742	951.364	1229.01	801.736	933.002	0.25181	-1.19236
LL0000000861	aldh16a1	ENSDARG00000037935	492710	223.725	253.977	311.338	109.959	162.868	203.037	0.264945	0.729528
LL0000000862	aldh18a1	ENSDARG00000099579	557186	509.703	743.512	580.264	857.288	774.591	758.971	0.498285	-0.382932
LL0000000863	aldh1a2	ENSDARG00000053493	116713	572.93	1802.07	2617.94	867.992	1301.97	2356.19	0.925791	0.141606
LL0000000864	aldh1a3	ENSDARG00000076933	751785	18.4816	176.426	92.5338	109.959	170.623	162.429	0.675953	-0.624048
LL0000000865	aldh1l1	ENSDARG00000077004	100526683	364.769	443.974	646.773	270.518	430.436	517.26	0.78219	0.256767
LL0000000866	aldh1l2	ENSDARG00000070230	100333269	87.5445	31.9894	92.5338	147.909	50.4114	30.9389	0.959028	-0.112361
LL0000000867	aldh2.1	ENSDARG00000089924	393462	792.764	1087.64	768.224	856.315	965.573	952.339	0.937024	-0.0668459
LL0000000868	aldh2.2	ENSDARG00000028087	368239	399.787	589.381	621.712	342.526	318.949	300.688	0.13721	0.743521
LL0000000869	aldh3a1	ENSDARG00000074791	100000026	94.3535	221.987	106.028	96.3354	54.2892	97.651	0.42573	0.766561
LL0000000870	aldh3a2a	ENSDARG00000028259	323653	127.426	110.509	128.198	85.6315	80.4644	118.922	0.693064	0.361284
LL0000000871	aldh3a2b	ENSDARG00000029381	447920	356.014	464.331	269.89	180.021	264.66	213.672	0.228022	0.72768
LL0000000872	aldh3b1	ENSDARG00000013839	282559	62.2539	161.886	159.043	63.2505	137.662	198.203	0.974494	-0.0587729
LL0000000873	aldh3b2	ENSDARG00000035606	557008	187.734	245.252	367.244	333.768	320.888	316.157	0.744938	-0.278726
LL0000000874	aldh4a1	ENSDARG00000038207	394133	30.1542	35.8669	99.2811	92.4431	130.876	95.7173	0.373495	-0.948437
LL0000000875	aldh5a1	ENSDARG00000076544	565235	196.489	152.192	320.977	396.046	266.599	270.716	0.563917	-0.478951
LL0000000876	aldh6a1	ENSDARG00000053485	436647	1793.69	1554.88	1989.48	1450.87	2433.32	1878.57	0.893277	-0.110449
LL0000000877	aldh7a1	ENSDARG00000018426	334197	861.827	904.428	1185.59	764.845	1183.7	1164.08	0.933742	-0.0765109
LL0000000878	aldh8a1	ENSDARG00000036776	447801	5.8363	33.9282	92.5338	21.4079	19.389	32.8726	0.676466	0.844762
LL0000000879	aldh9a1a.1	ENSDARG00000069100	100005587	2714.85	2407.93	2927.35	1345.78	2225.86	2794.17	0.637018	0.338664
LL0000000880	aldh9a1a.2	ENSDARG00000055331	100006238	2.91815	3.87751	16.3862	11.677	5.81671	6.76789	0.986925	-0.0651841
LL0000000881	aldh9a1b	ENSDARG00000037061	399481	293.76	329.588	237.118	145.963	158.02	145.026	0.0584611	0.938354
LL0000000882	aldoaa	ENSDARG00000011665	336425	3856.82	3742.76	5996.39	2059.05	2847.28	3650.79	0.233866	0.667982
LL0000000883	aldoab	ENSDARG00000034470	406496	203.298	100.815	113.74	118.716	118.273	228.175	0.907259	-0.154825
LL0000000884	aldob	ENSDARG00000053684	321664	1684.75	1364.88	2721.07	1370.1	3433.79	4578.96	0.39853	-0.701279
LL0000000885	aldoca	ENSDARG00000057661	792692	50.5813	27.1425	0	123.582	191.951	178.866	0.0634312	-2.66947
LL0000000886	aldocb	ENSDARG00000019702	369193	1781.04	1661.51	2655.53	2811.24	2749.36	6936.12	0.109211	-1.03512
LL0000000887	alg1	ENSDARG00000054963	334161	116.726	149.284	189.887	249.11	125.059	177.899	0.790392	-0.276067
LL0000000888	alg10	ENSDARG00000053917	100331575	139.098	82.397	114.703	214.079	71.7394	74.4468	0.9531	-0.0996925
LL0000000889	alg11	ENSDARG00000031202	407614	190.652	185.151	122.415	162.505	126.029	149.86	0.852863	0.184511
LL0000000890	alg12	ENSDARG00000041199	569494	230.534	309.231	515.683	289.006	490.542	374.168	0.910393	-0.128402
LL0000000891	alg13	ENSDARG00000054374	557181	0.972717	3.87751	0.963894	17.5155	12.6029	11.6021	0.18449	-2.84325
LL0000000892	alg14	ENSDARG00000103093	450072	20.427	70.7645	36.628	42.8158	31.0224	45.4416	0.961733	0.0997869
LL0000000893	alg2	ENSDARG00000070399	403068	161.471	289.843	298.807	198.509	259.813	188.534	0.828679	0.213715
LL0000000894	alg3	ENSDARG00000053155	553725	106.026	86.2745	121.451	147.909	158.02	76.3805	0.798816	-0.285062
LL0000000895	alg5	ENSDARG00000061235	751635	468.849	792.95	651.592	366.853	483.756	472.786	0.372597	0.531888
LL0000000896	alg6	ENSDARG00000017617	445327	27.2361	123.111	266.999	152.774	165.776	121.822	0.970165	-0.0774015
LL0000000897	alg8	ENSDARG00000044627	327601	108.944	199.692	217.84	168.344	182.257	196.269	0.964973	-0.0547848
LL0000000898	alg9	ENSDARG00000012840	393598	470.795	392.597	512.792	534.224	396.505	580.105	0.870484	-0.134666
LL0000000899	alk	ENSDARG00000095833	563509	70.0356	69.7951	37.5919	149.855	83.3728	128.59	0.206953	-1.02816
LL0000000900	alkal1	ENSDARG00000074387	100535009	20.427	17.4488	9.63894	66.1698	75.6172	22.2374	0.125792	-1.78761
LL0000000901	alkal2a	ENSDARG00000091073	101886413	27.2361	49.4382	49.1586	75.9006	57.1976	22.2374	0.860231	-0.303728
LL0000000902	alkal2b	ENSDARG00000042815	100329254	0	6.78563	18.314	27.2464	47.5031	53.1763	0.197117	-2.34902
LL0000000903	alkbh1	ENSDARG00000071164	553720	72.9537	165.763	251.576	102.174	213.279	161.463	0.980938	0.0399563
LL0000000904	alkbh2	ENSDARG00000059856	569291	8.75445	17.4488	47.2308	26.2733	40.7169	35.7731	0.80717	-0.484564
LL0000000905	alkbh3	ENSDARG00000045606	792266	144.935	193.875	134.945	185.859	132.815	165.33	0.979883	-0.0308776
LL0000000906	alkbh4	ENSDARG00000052247	553475	89.4899	188.059	139.765	79.793	118.273	163.396	0.869415	0.207265
LL0000000907	alkbh5	ENSDARG00000063003	570158	252.906	303.415	174.465	164.451	195.829	258.147	0.798816	0.240792
LL0000000908	alkbh6	ENSDARG00000077253	317736	49.6085	42.6526	37.5919	39.8965	37.8086	26.1047	0.824893	0.322948
LL0000000909	alkbh7	ENSDARG00000037906	550272	56.4176	72.7032	96.3894	72.0083	88.22	118.922	0.791337	-0.307808
LL0000000910	alkbh8	ENSDARG00000060256	556362	112.835	126.988	146.512	99.2547	179.348	151.794	0.888788	-0.155814
LL0000000911	allc	ENSDARG00000042562	436989	0	17.4488	17.3501	17.5155	12.6029	22.2374	0.856736	-0.589126
LL0000000912	alms1	ENSDARG00000074779	561882	389.087	597.136	599.542	592.609	736.783	452.482	0.848776	-0.168195
LL0000000913	alox12	ENSDARG00000069463	322732	92.4081	121.172	184.104	143.044	152.204	248.478	0.639455	-0.451215
LL0000000914	alox5a	ENSDARG00000057273	567204	210.107	126.019	208.201	148.882	187.104	292.953	0.849194	-0.208473
LL0000000915	alox5ap	ENSDARG00000054755	337376	30.1542	23.265	53.0142	10.7039	19.389	26.1047	0.540603	0.921326
LL0000000916	alox5b.1	ENSDARG00000043085	573013	17.5089	1.93875	1.92779	7.78468	4.84725	2.90052	0.910242	0.460479
LL0000000917	alox5b.2	ENSDARG00000043089	724056	8.75445	0.969376	0	18.4886	2.90835	1.93368	0.776555	-1.26304
LL0000000918	alox5b.3	ENSDARG00000069966	553602	33.0724	5.81626	5.78336	30.1656	15.5112	3.86737	0.965794	-0.149431
LL0000000919	ALOXE3	ENSDARG00000073781	794132	2.91815	0	0	15.5694	9.69451	3.86737	0.344462	-3.32113
LL0000000920	alp3	ENSDARG00000098063	100330410	0	16.4794	0.963894	14.5963	7.75561	6.76789	0.862652	-0.739306
LL0000000921	alpi.1	ENSDARG00000015273	541539	103.108	202.6	136.873	285.114	458.55	511.459	0.00827475	-1.50382
LL0000000922	alpi.2	ENSDARG00000053774	574009	0	34.8975	39.5197	41.8427	42.6558	10.6353	0.916875	-0.35417
LL0000000923	alpk2	ENSDARG00000079637	559835	64.1993	38.7751	11.5667	107.039	48.4725	71.5463	0.461361	-0.987356
LL0000000924	alpk3a	ENSDARG00000078989	100321139	57.3903	20.3569	21.2057	60.3313	60.106	29.0052	0.705079	-0.59489
LL0000000925	alpk3b	ENSDARG00000105630	100534893	31.1269	31.9894	28.9168	83.6853	52.3503	45.4416	0.328481	-0.979519
LL0000000926	alpl	ENSDARG00000015546	393982	2301.45	3366.64	1242.46	292.899	422.681	320.025	7.14981e-08	2.73832
LL0000000927	als2a	ENSDARG00000075111	557014	405.623	410.046	315.193	142.07	175.471	320.025	0.215658	0.826725
LL0000000928	als2b	ENSDARG00000076924	100318899	523.322	473.056	476.164	573.147	501.206	485.354	0.915146	-0.0829657
LL0000000929	alx1	ENSDARG00000062824	565176	27.2361	71.7338	39.5197	144.017	229.76	237.843	0.00168571	-2.14285
LL0000000930	alx4a	ENSDARG00000088332	100006399	70.0356	111.478	52.0503	338.634	771.683	538.531	1.04099e-06	-2.81963
LL0000000931	alx4b	ENSDARG00000074442	497424	0	40.7138	15.4223	70.0621	85.3117	104.419	0.181929	-2.21029
LL0000000932	alyref	ENSDARG00000077732	560127	7054.14	5601.06	7029.68	3430.13	4362.53	3360.74	0.0321653	0.819605
LL0000000933	amacr	ENSDARG00000057435	553653	72.9537	82.397	82.8949	105.093	137.662	87.9826	0.595625	-0.473207
LL0000000934	ambn	ENSDARG00000075598	100001700	0	0	5.78336	21.4079	12.6029	1.93368	0.479225	-2.63452
LL0000000935	ambp	ENSDARG00000004296	394093	8.75445	91.1214	222.66	51.5735	78.5255	215.606	0.970441	-0.100044
LL0000000936	ambra1a	ENSDARG00000008322	100332642	472.74	448.821	433.752	380.476	467.275	425.41	0.908027	0.0901988
LL0000000937	ambra1b	ENSDARG00000039878	559106	409.514	762.899	620.748	560.497	588.457	716.43	0.956622	-0.0569623
LL0000000938	amd1	ENSDARG00000043856	792097	2268.38	2387.57	2643.96	1813.83	2186.11	2229.54	0.685043	0.228767
LL0000000939	AMDHD1	ENSDARG00000007366	402826	0	7.75501	35.6641	36.0042	22.2974	38.6737	0.660927	-1.15897
LL0000000940	amdhd2	ENSDARG00000100376	402981	395.896	451.729	440.5	185.859	206.493	279.417	0.04786	0.939209
LL0000000941	amer1	ENSDARG00000079624	100885784	522.349	333.465	379.774	507.95	422.681	570.437	0.70305	-0.280811
LL0000000942	amer2	ENSDARG00000075222	100101649	129.371	249.13	747.982	875.777	632.082	451.515	0.460549	-0.798523
LL0000000943	amfra	ENSDARG00000020218	406442	1495.07	912.183	1384.15	611.098	921.948	763.805	0.165076	0.723069
LL0000000944	amfrb	ENSDARG00000105578	101884807	50.5813	30.0507	10.6028	59.3582	88.22	31.9058	0.497021	-0.976378
LL0000000945	amh	ENSDARG00000014357	493624	69.0629	48.4688	4.81947	38.9234	9.69451	22.2374	0.719446	0.788036
LL0000000946	amigo1	ENSDARG00000079620	100144409	7.78173	71.7338	225.551	482.65	366.452	632.314	0.0488415	-2.27968
LL0000000947	amigo3	ENSDARG00000074469	100000131	226.643	105.662	156.151	201.429	132.815	181.766	0.951693	-0.07919
LL0000000948	ammecr1	ENSDARG00000012892	393553	4325.67	4304.03	4564.04	2790.81	2796.87	2152.19	0.036226	0.769477
LL0000000949	amn	ENSDARG00000062947	793454	137.153	5.81626	41.4474	28.2195	21.3279	19.3368	0.415031	1.42069
LL0000000950	amn1	ENSDARG00000070478	751744	178.007	159.947	119.523	160.559	162.868	241.71	0.737539	-0.304971
LL0000000951	amot	ENSDARG00000078335	563421	286.951	438.158	317.121	257.868	281.141	130.524	0.392796	0.638477
LL0000000952	amotl2a	ENSDARG00000061923	558920	4665.15	5595.24	4278.73	1286.42	1780.88	1352.61	7.64758e-07	1.71785
LL0000000953	amotl2b	ENSDARG00000061948	559784	707.165	917.03	887.746	598.447	1079.97	375.135	0.767891	0.290691
LL0000000954	ampd1	ENSDARG00000033832	393867	22.3725	0.969376	19.2779	38.9234	50.4114	30.9389	0.400414	-1.49671
LL0000000955	ampd2a	ENSDARG00000104491	100330772	46.6904	59.132	94.4616	44.7619	52.3503	38.6737	0.629064	0.560827
LL0000000956	ampd2b	ENSDARG00000029952	571355	94.3535	82.397	198.562	261.76	179.348	317.124	0.18136	-1.01447
LL0000000957	ampd3a	ENSDARG00000005800	556578	194.543	97.907	113.74	148.882	96.9451	28.0384	0.67678	0.56873
LL0000000958	ampd3b	ENSDARG00000032469	333997	56.4176	97.907	235.19	65.1967	139.601	198.203	0.980205	-0.0490616
LL0000000959	amph	ENSDARG00000007663	393804	82.6809	187.09	768.224	1029.52	521.565	1212.42	0.184622	-1.41266
LL0000000960	amt	ENSDARG00000010862	450000	82.6809	65.9176	158.079	124.555	152.204	200.136	0.496064	-0.636884
LL0000000961	amy2a	ENSDARG00000013856	406539	19.4543	5.81626	3.85558	13.6232	2.90835	43.5079	0.696622	-1.04396
LL0000000962	anapc1	ENSDARG00000075687	568795	346.287	344.129	398.088	234.514	335.43	223.34	0.470894	0.456448
LL0000000963	anapc10	ENSDARG00000090152	798352	241.234	388.72	259.288	102.174	158.99	234.943	0.241768	0.841878
LL0000000964	anapc11	ENSDARG00000102531	768140	412.432	426.526	274.71	163.478	245.271	445.714	0.698575	0.382182
LL0000000965	anapc13	ENSDARG00000078435	569473	344.342	524.433	130.126	93.4162	158.02	218.506	0.225311	1.0878
LL0000000966	anapc15	ENSDARG00000101285	751740	343.369	355.761	223.623	151.801	215.218	320.025	0.623725	0.425487
LL0000000967	anapc16	ENSDARG00000013822	550576	705.22	831.725	577.373	256.895	470.184	681.623	0.439887	0.5858
LL0000000968	anapc2	ENSDARG00000105035	100318335	177.034	161.886	160.97	127.474	175.471	175.965	0.955802	0.0618196
LL0000000969	anapc4	ENSDARG00000032237	494046	30.1542	119.233	155.187	89.5238	116.334	121.822	0.954251	-0.105421
LL0000000970	anapc5	ENSDARG00000008461	322854	117.699	196.783	254.468	161.532	185.165	190.468	0.946862	0.082985
LL0000000971	anapc7	ENSDARG00000063005	558402	262.633	263.67	238.082	158.613	203.585	186.6	0.434089	0.478
LL0000000972	and1	ENSDARG00000088514	794315	153.689	357.7	225.551	307.495	287.927	608.143	0.396855	-0.7077
LL0000000973	and2	ENSDARG00000079302	566702	285.979	532.188	348.93	418.427	382.933	1465.73	0.2943	-0.957927
LL0000000974	and3	ENSDARG00000056873	561047	35.9905	448.821	87.7144	143.044	106.64	268.782	0.950088	0.143083
LL0000000976	angel1	ENSDARG00000077567	569547	112.835	133.774	108.92	119.689	160.929	134.391	0.81397	-0.223197
LL0000000977	angel2	ENSDARG00000016743	562704	124.508	213.263	236.154	198.509	190.012	216.573	0.948212	-0.0762532
LL0000000978	angpt1	ENSDARG00000030364	114407	234.425	100.815	182.176	264.679	370.33	242.677	0.29896	-0.762396
LL0000000979	angpt2a	ENSDARG00000014946	101101687	1570.94	1786.56	577.373	13.6232	9.69451	14.5026	8.76962e-24	6.70099
LL0000000980	angpt2b	ENSDARG00000053906	114408	0	57.1932	20.2418	53.5197	92.0978	67.6789	0.478113	-1.46176
LL0000000981	angpt4	ENSDARG00000076787	571050	19.4543	18.4181	8.67505	57.412	59.1365	26.1047	0.166059	-1.61591
LL0000000982	angptl1a	ENSDARG00000012071	544656	215.943	135.713	205.309	538.116	1137.17	577.204	0.000153369	-2.01586
LL0000000983	angptl1b	ENSDARG00000100159	334311	36.9632	29.0813	33.7363	35.0311	22.2974	17.4031	0.798854	0.41715
LL0000000984	angptl2a	ENSDARG00000024030	569092	7.78173	18.4181	21.2057	101.201	156.082	69.6126	0.000986614	-2.78537
LL0000000985	angptl2b	ENSDARG00000068369	503514	153.689	343.159	295.915	547.847	906.437	450.548	0.0425045	-1.26467
LL0000000986	angptl3	ENSDARG00000044365	114421	35.9905	94.0295	80.9671	44.7619	27.1446	62.8447	0.619668	0.646876
LL0000000987	angptl4	ENSDARG00000035859	492647	3866.55	4891.47	4305.72	5017.23	7758.52	1374.85	0.937961	-0.115292
LL0000000988	angptl5	ENSDARG00000056630	566212	45.7177	18.4181	21.2057	232.567	375.177	245.578	1.51944e-07	-3.32205
LL0000000989	angptl6	ENSDARG00000020265	561927	17.5089	3.87751	10.6028	40.8696	12.6029	41.5742	0.33866	-1.57118
LL0000000990	angptl7	ENSDARG00000027582	450053	147.853	173.518	289.168	2201.12	2350.92	1425.12	1.67882e-12	-3.29123
LL0000000991	ank1a	ENSDARG00000092143	449796	94.3535	75.6113	88.6783	396.046	453.703	397.372	1.77069e-08	-2.26958
LL0000000992	ank1b	ENSDARG00000074777	797662	173.144	113.417	62.6531	239.379	142.509	477.62	0.132021	-1.29948
LL0000000993	ank2a	ENSDARG00000009026	568926	121.59	158.008	409.655	870.911	501.206	959.107	0.0115771	-1.75792
LL0000000994	ank2b	ENSDARG00000043313	450043	461.068	701.828	1461.26	4316.61	1601.53	2188.93	0.0203368	-1.62731
LL0000000995	ank3a	ENSDARG00000061736	103909035	230.534	133.774	188.923	581.905	305.377	498.89	0.0169868	-1.32516
LL0000000996	ank3b	ENSDARG00000110151	100126016	623.511	1108	1380.3	2527.1	2704.77	3574.41	0.00189415	-1.50077
LL0000000997	ankar	ENSDARG00000000516	368636	52.5267	8.72439	2.89168	37.9503	15.5112	14.5026	0.980604	-0.0836339
LL0000000998	ankdd1a	ENSDARG00000098647	569271	459.122	355.761	192.779	74.9276	66.8921	50.2758	3.4543e-05	2.39114
LL0000000999	ankdd1b	ENSDARG00000025866	562681	22.3725	11.6325	14.4584	22.381	26.1752	14.5026	0.856143	-0.379856
LL0000001000	ankef1a	ENSDARG00000019135	566413	35.9905	7.75501	0	41.8427	26.1752	19.3368	0.725802	-0.997984
LL0000001001	ankef1b	ENSDARG00000060211	100149106	60.3084	4.84688	39.5197	30.1656	26.1752	22.2374	0.857615	0.413708
LL0000001002	ANKFN1	ENSDARG00000060941	100333998	61.2811	93.0601	52.0503	71.0352	95.0062	131.49	0.614922	-0.527738
LL0000001003	ankfy1	ENSDARG00000061013	568480	294.733	492.443	239.046	199.482	152.204	188.534	0.135799	0.925716
LL0000001004	ankha	ENSDARG00000071724	571148	18.4816	31.9894	53.0142	96.3354	55.2587	64.7784	0.322251	-1.06386
LL0000001005	ankhb	ENSDARG00000014969	323738	194.543	170.61	389.413	515.735	380.025	618.779	0.123557	-1.00511
LL0000001006	ankhd1	ENSDARG00000077860	563327	2149.7	2527.16	2085.87	1149.21	1863.28	1458	0.218047	0.597168
LL0000001007	ankib1a	ENSDARG00000060768	566524	685.765	841.419	790.393	694.783	665.043	811.18	0.900481	0.0942539
LL0000001008	ankib1b	ENSDARG00000076829	561277	1019.41	1140.96	852.082	740.518	727.088	842.119	0.464045	0.383204
LL0000001009	ankk1	ENSDARG00000056921	100170831	123.535	111.478	26.989	148.882	54.2892	165.33	0.748264	-0.49217
LL0000001010	ankle2	ENSDARG00000035607	559297	99.2171	142.498	203.382	280.249	248.179	316.157	0.135828	-0.924048
LL0000001011	ankmy1	ENSDARG00000062702	568987	54.4721	19.3875	59.7614	45.735	31.9919	16.4363	0.77074	0.505045
LL0000001012	ankmy2a	ENSDARG00000005948	334389	177.034	304.384	340.255	290.952	316.041	273.616	0.924901	-0.0998958
LL0000001014	ankra2	ENSDARG00000035399	406403	411.459	380.965	353.749	328.903	356.758	654.552	0.804353	-0.225664
LL0000001015	ankrd10a	ENSDARG00000037100	393955	93.3808	123.111	377.846	484.596	349.972	336.461	0.280945	-0.978342
LL0000001016	ankrd10b	ENSDARG00000004771	559527	476.631	377.087	579.3	506.977	472.123	609.11	0.855977	-0.148335
LL0000001017	ankrd11	ENSDARG00000051886	327352	12131.7	13161.2	11747.9	7821.66	11010.1	7960.01	0.314503	0.467332
LL0000001018	ankrd12	ENSDARG00000052419	393119	5148.59	4355.41	5427.69	2913.42	4572.9	3082.29	0.337124	0.498592
LL0000001019	ankrd13a	ENSDARG00000061901	556837	766.501	613.615	566.77	245.217	358.697	355.798	0.0258799	1.02046
LL0000001020	ankrd13b	ENSDARG00000014652	568981	47.6631	53.3157	29.8807	78.8199	43.6253	37.7068	0.849305	-0.291421
LL0000001021	ankrd13c	ENSDARG00000103831	325167	1137.11	1086.67	1364.87	1011.04	1054.76	1157.31	0.811776	0.154993
LL0000001022	ankrd13d	ENSDARG00000098140	562931	60.3084	91.1214	106.992	165.424	80.4644	203.037	0.380397	-0.796692
LL0000001023	ankrd16	ENSDARG00000003822	550225	52.5267	47.4994	83.8588	59.3582	54.2892	83.1484	0.950317	-0.0978421
LL0000001024	ankrd1a	ENSDARG00000075263	100151027	25.2906	31.9894	3.85558	59.3582	99.8534	69.6126	0.107849	-1.90441
LL0000001025	ankrd1b	ENSDARG00000076192	564159	33.0724	0	9.63894	5.83851	4.84725	8.70157	0.741501	1.13933
LL0000001026	ankrd2	ENSDARG00000002722	101886079	0	0	2.89168	11.677	4.84725	2.90052	1	-2.74607
LL0000001027	ankrd22	ENSDARG00000002298	393244	0.972717	175.457	150.367	61.3044	156.082	80.2478	0.964786	0.134885
LL0000001028	ankrd24	ENSDARG00000062103	565326	61.2811	69.7951	21.2057	108.986	114.395	80.2478	0.320985	-0.995682
LL0000001029	ankrd27	ENSDARG00000089207	386887	84.6263	95.9682	113.74	113.851	47.5031	49.3089	0.679465	0.482637
LL0000001030	ankrd28b	ENSDARG00000009023	560747	1354.02	1294.12	977.389	581.905	811.43	669.054	0.0647595	0.813862
LL0000001031	ankrd29	ENSDARG00000057159	553798	43.7722	44.5913	20.2418	54.4928	26.1752	64.7784	0.793004	-0.421518
LL0000001032	ankrd31	ENSDARG00000052731	550610	0	15.51	0	5.83851	10.664	3.86737	0.947736	-0.393274
LL0000001033	ankrd33aa	ENSDARG00000055638	557568	66.1447	71.7338	22.1696	282.195	328.644	125.689	0.00521909	-2.20235
LL0000001034	ankrd33ab	ENSDARG00000002508	569518	35.0178	4.84688	0.963894	85.6315	80.4644	37.7068	0.16022	-2.31993
LL0000001035	ankrd33ba	ENSDARG00000058357	568270	38.9087	28.1119	26.989	232.567	87.2506	63.8115	0.0224679	-2.02885
LL0000001036	ankrd33bb	ENSDARG00000015589	557905	49.6085	48.4688	47.2308	175.155	119.242	95.7173	0.0329591	-1.42475
LL0000001037	ankrd34a		798097	0	29.0813	0	0	118.273	59.9442	0.762631	-2.61541
LL0000001038	ankrd34ba	ENSDARG00000077086	560938	18.4816	55.2544	30.8446	63.2505	42.6558	39.6405	0.758453	-0.476784
LL0000001039	ankrd34bb	ENSDARG00000061641	565548	106.026	7.75501	70.3643	108.012	125.059	94.7505	0.59084	-0.83209
LL0000001040	ankrd37	ENSDARG00000056376	793783	49.6085	54.2851	74.2198	78.8199	52.3503	49.3089	0.990645	-0.0189059
LL0000001041	ankrd39	ENSDARG00000041350	100000333	110.89	24.2344	21.2057	21.4079	17.4501	29.0052	0.429506	1.20373
LL0000001042	ankrd40	ENSDARG00000076490	100005118	215.943	343.159	365.316	319.172	236.546	336.461	0.963154	0.0512413
LL0000001043	ankrd44	ENSDARG00000026028	561373	285.006	327.649	637.134	502.112	257.874	372.234	0.904436	0.142572
LL0000001044	ankrd45	ENSDARG00000011326	553808	0	19.3875	5.78336	22.381	21.3279	42.541	0.437974	-1.77671
LL0000001045	ankrd46a	ENSDARG00000044328	100329397	786.928	674.686	545.564	497.247	432.375	615.878	0.548004	0.377074
LL0000001046	ankrd46b	ENSDARG00000015780	402888	73.9265	120.203	143.62	186.832	146.387	239.777	0.310873	-0.762511
LL0000001047	ankrd49	ENSDARG00000023508	550246	79.7628	103.723	59.7614	60.3313	78.5255	75.4136	0.885431	0.182922
LL0000001048	ANKRD50	ENSDARG00000045666		736.346	862.745	754.729	511.843	475.031	445.714	0.076647	0.716388
LL0000001049	ankrd50l	ENSDARG00000007077	449857	318.078	596.166	514.719	130.393	158.02	204.004	0.00304263	1.537
LL0000001050	ankrd52a	ENSDARG00000036826	553206	2350.08	2925.58	3037.23	2675.01	2831.77	2689.75	0.980153	0.0203407
LL0000001051	ankrd52b		564614	0	0	0	10.7039	10.664	0	1	-5.32094
LL0000001052	ankrd54	ENSDARG00000055743	436851	317.106	330.557	478.091	345.445	358.697	419.609	0.998853	0.00259065
LL0000001053	ankrd55	ENSDARG00000099182	100006755	19.4543	15.51	14.4584	79.793	37.8086	145.026	0.0112091	-2.4099
LL0000001054	ankrd63		101885975	37.9359	3.87751	8.67505	22.381	21.3279	10.6353	0.975045	-0.106329
LL0000001055	ANKRD66	ENSDARG00000090489	101886816	1.94543	0	3.85558	2.91926	2.90835	14.5026	1	-1.80891
LL0000001056	ankrd6a	ENSDARG00000057790	100330565	60.3084	66.887	48.1947	204.348	116.334	22.2374	0.475653	-0.967269
LL0000001057	ankrd6b	ENSDARG00000029370	378477	513.594	344.129	428.933	284.141	616.571	405.107	0.986095	-0.0213431
LL0000001058	ankrd9	ENSDARG00000028804	492328	6.80902	38.7751	32.7724	26.2733	48.4725	65.7452	0.61397	-0.842269
LL0000001059	anks1aa	ENSDARG00000062396	100334911	12.6453	26.1732	4.81947	8.75777	14.5418	1.93368	0.780923	0.790271
LL0000001060	anks1ab	ENSDARG00000078901	100003659	463.986	599.075	599.542	240.352	121.181	242.677	0.00492754	1.46033
LL0000001061	anks1b	ENSDARG00000003512	565408	6310.99	5704.78	4336.56	779.441	577.793	1161.18	2.99453e-10	2.6989
LL0000001062	anks3	ENSDARG00000038557	100136846	107.972	160.916	88.6783	132.34	172.562	76.3805	0.949606	-0.0926475
LL0000001063	anks4b	ENSDARG00000036846	431735	110.89	43.6219	113.74	153.747	99.8534	128.59	0.640197	-0.510677
LL0000001064	anks6		449657	47.6631	0	0	2.91926	0	0	0.450013	4.02993
LL0000001065	ankzf1	ENSDARG00000041904	553307	279.17	214.232	166.754	216.998	283.08	346.129	0.66371	-0.358267
LL0000001066	anln	ENSDARG00000060917	562517	475.658	401.322	512.792	366.853	382.933	194.335	0.41359	0.557831
LL0000001067	ano1	ENSDARG00000102335	407698	68.0902	75.6113	192.779	209.213	104.701	242.677	0.494301	-0.726007
LL0000001068	ano10a	ENSDARG00000057736	566425	449.395	661.115	806.779	343.499	660.196	593.641	0.772205	0.263404
LL0000001069	ano10b	ENSDARG00000018159	565195	493.167	523.463	399.052	246.191	274.355	289.086	0.0748747	0.806137
LL0000001070	ano11	ENSDARG00000077327	100007289	2.91815	13.5713	41.4474	56.4389	50.4114	53.1763	0.348697	-1.46539
LL0000001071	ano2	ENSDARG00000101363	566373	88.5172	108.57	70.3643	433.023	182.257	178.866	0.0221688	-1.57012
LL0000001072	ANO2_1_of_many	ENSDARG00000003210		0	0	0.963894	18.4886	19.389	6.76789	0.0420455	-5.42225
LL0000001073	ano3	ENSDARG00000058015	553392	144.935	177.396	188.923	470	376.147	313.257	0.0129629	-1.18122
LL0000001074	ano5a	ENSDARG00000015731	100534737	1280.1	986.825	922.447	536.17	625.296	361.599	0.0229934	1.0663
LL0000001075	ano5b	ENSDARG00000036147	560102	1604.98	1360.03	1173.06	514.762	401.353	310.356	1.3758e-05	1.75446
LL0000001076	ano6	ENSDARG00000061544	100535437	70.0356	145.406	149.404	72.9814	80.4644	70.5794	0.427174	0.703685
LL0000001077	ANO7	ENSDARG00000104834	556876	1248	1787.53	835.696	30.1656	17.4501	8.70157	1.50083e-21	6.1035
LL0000001078	ano8a	ENSDARG00000076265	562947	2.91815	28.1119	53.9781	108.012	40.7169	45.4416	0.492997	-1.19141
LL0000001079	ano8b	ENSDARG00000077229	562782	405.623	379.995	458.814	600.394	465.336	682.59	0.372188	-0.490475
LL0000001080	ano9a	ENSDARG00000078941	100126106	149.798	229.742	131.09	67.1429	78.5255	58.0105	0.0349479	1.32598
LL0000001081	ano9b	ENSDARG00000079324	559809	28.2088	110.509	80.9671	68.116	66.8921	164.363	0.769758	-0.446488
LL0000001082	anos1a	ENSDARG00000012896	30630	208.161	339.282	638.098	462.215	528.351	637.149	0.621348	-0.457269
LL0000001083	anos1b	ENSDARG00000004932	30652	78.79	47.4994	52.0503	310.414	337.369	232.042	7.34746e-06	-2.30268
LL0000001084	anp32a	ENSDARG00000006487	335907	1945.43	1986.25	1903.69	1427.52	1295.19	1437.69	0.218455	0.488105
LL0000001085	anp32b	ENSDARG00000023330	322000	3167.17	3480.06	3777.5	1884.87	2650.48	2576.63	0.216927	0.551686
LL0000001086	anp32e	ENSDARG00000054804	406562	1892.91	2098.7	3770.75	4120.04	2547.72	2100.95	0.862155	-0.17586
LL0000001087	ANPEP	ENSDARG00000097285	100004744	0	0.969376	0	13.6232	12.6029	8.70157	0.0794847	-5.06812
LL0000001088	anpepa	ENSDARG00000041083	558452	24.3179	21.3263	21.2057	17.5155	38.778	63.8115	0.569405	-0.845429
LL0000001089	anpepb	ENSDARG00000103878	322533	109.917	17.4488	31.8085	24.3271	22.2974	21.2705	0.403256	1.22914
LL0000001090	antxr1a	ENSDARG00000025672	793153	106.999	56.2238	16.3862	65.1967	64.9532	34.8063	0.955898	0.122685
LL0000001091	antxr1b	ENSDARG00000074075	556289	92.4081	28.1119	12.5306	115.797	106.64	60.911	0.423648	-1.09076
LL0000001092	antxr1c	ENSDARG00000063612	563907	605.03	947.081	580.264	726.895	1059.61	554.967	0.892687	-0.134954
LL0000001093	antxr1d	ENSDARG00000060845	563132	30.1542	5.81626	8.67505	19.4617	37.8086	25.1379	0.653217	-0.884561
LL0000001094	antxr2a	ENSDARG00000104118	557239	2455.14	2764.66	1838.15	1066.5	1811.9	1676.5	0.243895	0.631818
LL0000001095	antxr2b	ENSDARG00000063011	560841	12.6453	0	16.3862	18.4886	22.2974	6.76789	0.832744	-0.711798
LL0000001096	ANXA1_1_of_many	ENSDARG00000098481	550268	205.243	123.111	118.559	58.3851	119.242	257.18	0.982551	0.0395375
LL0000001097	anxa11a	ENSDARG00000077383	368215	3061.14	2865.48	2275.75	680.187	1471.63	1523.74	0.0276535	1.15807
LL0000001098	anxa11b	ENSDARG00000002632	353365	3028.07	3503.33	2871.44	1512.17	1431.88	1511.17	0.000914486	1.0776
LL0000001099	anxa13	ENSDARG00000013976	81880	5106.76	6033.4	2468.53	818.365	660.196	851.787	6.2673e-08	2.54591
LL0000001100	anxa13l	ENSDARG00000013613	554118	366.714	473.056	320.013	394.1	371.3	329.693	0.927972	0.0827996
LL0000001101	anxa1a	ENSDARG00000026726	334724	2546.57	3111.7	1734.05	703.541	1303.91	1517.94	0.0562103	1.06823
LL0000001102	anxa1b	ENSDARG00000100095	353358	420.214	379.995	320.013	215.052	320.888	929.135	0.748593	-0.387215
LL0000001103	anxa1c	ENSDARG00000104359	494158	415.35	240.405	205.309	88.5508	119.242	301.655	0.450069	0.75712
LL0000001104	anxa2a	ENSDARG00000003216	325557	5565.88	6455.08	3214.59	1045.09	2365.46	2429.67	0.0164324	1.38334
LL0000001105	anxa2b	ENSDARG00000053625	799806	0	45.5607	44.3391	23.354	22.2974	239.777	0.476735	-1.66668
LL0000001106	anxa3a	ENSDARG00000009196	447893	63.2266	155.1	82.8949	36.0042	73.6783	267.815	0.860231	-0.325688
LL0000001107	anxa3b	ENSDARG00000044254	492336	1234.38	1331.92	887.746	487.516	507.992	427.344	0.0011628	1.2795
LL0000001108	anxa4	ENSDARG00000036456	353362	2439.57	2378.85	1980.8	727.868	1438.67	1487.97	0.0870247	0.895686
LL0000001109	anxa5a	ENSDARG00000026406	557578	0	30.0507	39.5197	62.2775	163.837	114.087	0.150694	-2.28966
LL0000001110	anxa5b	ENSDARG00000016470	337132	1155.59	1051.77	1126.79	1140.46	1106.14	1550.81	0.779438	-0.187702
LL0000001111	anxa6	ENSDARG00000013335	353363	20.427	23.265	33.7363	54.4928	132.815	90.8831	0.028662	-1.84501
LL0000001112	aoc1	ENSDARG00000061355	555401	0	17.4488	41.4474	51.5735	27.1446	52.2094	0.631691	-1.15229
LL0000001113	aoc2	ENSDARG00000014646	541429	5662.18	2999.25	4581.39	1072.34	2329.59	2461.58	0.0420082	1.17537
LL0000001114	aox5	ENSDARG00000071475	64265	0	41.6832	4.81947	39.8965	35.8697	122.789	0.322394	-2.09418
LL0000001115	aox6	ENSDARG00000020054	570457	198.434	143.468	124.342	233.54	269.507	157.595	0.525586	-0.502815
LL0000001116	ap1ar	ENSDARG00000031496	100332265	233.452	201.63	279.529	336.687	238.485	277.484	0.75005	-0.254769
LL0000001117	ap1b1	ENSDARG00000020621	562166	2593.26	3321.08	2893.61	1200.79	1163.34	1364.21	0.000201803	1.24027
LL0000001118	ap1g1	ENSDARG00000102394	324466	3268.33	3219.3	2918.67	1620.19	2269.48	2537.96	0.245472	0.549335
LL0000001119	ap1g2	ENSDARG00000054337	100007877	176.062	434.281	481.947	318.199	317.01	451.515	0.995223	0.0073904
LL0000001120	ap1m1	ENSDARG00000096249	100330411	2535.87	2273.19	1684.89	880.642	1018.89	1196.95	0.00890527	1.06845
LL0000001121	ap1m2	ENSDARG00000096454	403021	154.662	66.887	228.443	174.182	201.646	262.014	0.63619	-0.50327
LL0000001122	ap1m3	ENSDARG00000039512	445244	172.171	200.661	140.729	159.586	184.196	448.614	0.501676	-0.625734
LL0000001123	ap1s1	ENSDARG00000056803	393279	441.613	341.22	209.165	325.01	222.004	488.255	0.962818	-0.0616371
LL0000001124	ap1s2	ENSDARG00000058504	327237	905.599	1139.02	1163.42	638.344	823.064	851.787	0.35575	0.471802
LL0000001125	ap1s3a	ENSDARG00000110439	550415	53.4994	15.51	10.6028	21.4079	19.389	34.8063	0.978834	0.0742933
LL0000001126	ap1s3b	ENSDARG00000027966	447897	411.459	890.857	354.713	99.2547	180.318	293.92	0.0373781	1.53071
LL0000001127	ap2a1	ENSDARG00000054320	558153	2210.01	3067.11	1868.99	1100.56	1425.09	1632.03	0.107419	0.781372
LL0000001128	ap2b1	ENSDARG00000035152	334632	692.574	1198.15	1520.06	1374	1221.51	1469.6	0.761115	-0.253175
LL0000001129	ap2m1a	ENSDARG00000002790	321051	6350.87	8210.62	5821.92	2607.87	2923.86	3548.31	0.00189776	1.16662
LL0000001130	ap2m1b	ENSDARG00000033899	394001	2394.83	3472.31	2805.9	1793.4	2126.98	3683.67	0.832248	0.189768
LL0000001131	ap2s1	ENSDARG00000026967	100148085	2894.8	3224.15	2002.97	1013.95	1290.34	1956.89	0.0768344	0.930559
LL0000001132	ap3b1a	ENSDARG00000100082	563316	242.206	254.946	359.533	111.905	135.723	64.7784	0.0138926	1.4554
LL0000001133	AP3B2	ENSDARG00000105296	100000165	42.7995	28.1119	157.115	173.209	121.181	224.307	0.285966	-1.18556
LL0000001134	ap3d1	ENSDARG00000071424	563359	673.12	702.798	355.677	283.168	320.888	300.688	0.0871235	0.936497
LL0000001135	ap3m1	ENSDARG00000029928	266798	118.671	287.905	220.732	140.124	179.348	200.136	0.798816	0.271755
LL0000001136	ap3m2	ENSDARG00000016128	415244	133.262	191.936	348.93	421.346	392.628	637.149	0.0975943	-1.10602
LL0000039760	ap3s1		449791	198.434	280.15	159.043	109.959	158.99	154.695	0.430036	0.589815
LL0000001138	ap3s2	ENSDARG00000039882	436812	262.633	304.384	377.846	302.63	278.232	389.637	0.970446	-0.0386044
LL0000001139	ap4b1	ENSDARG00000013726	393309	165.362	174.488	89.6422	116.77	101.792	62.8447	0.512868	0.609972
LL0000001140	ap4e1	ENSDARG00000103684	570467	123.535	183.212	199.526	126.501	152.204	123.756	0.705905	0.331113
LL0000001141	ap4m1	ENSDARG00000056871	436945	144.935	90.152	95.4255	89.5238	78.5255	97.651	0.761115	0.314846
LL0000001142	ap4s1	ENSDARG00000054220	368852	164.389	284.027	178.32	82.7122	137.662	234.943	0.664064	0.460938
LL0000001143	ap5b1	ENSDARG00000078805	100148772	82.6809	113.417	89.6422	137.205	118.273	119.888	0.647448	-0.393577
LL0000001144	ap5m1	ENSDARG00000031533	553681	93.3808	117.295	114.703	62.2775	71.7394	116.021	0.715049	0.37993
LL0000001145	ap5s1	ENSDARG00000076755	556111	116.726	165.763	236.154	78.8199	111.487	103.452	0.268367	0.820141
LL0000001146	ap5z1	ENSDARG00000078111	100537934	28.2088	80.4582	70.3643	72.0083	80.4644	70.5794	0.819737	-0.317082
LL0000001147	apaf1	ENSDARG00000021239	58131	667.284	633.003	427.005	168.344	246.241	198.203	0.00108818	1.49502
LL0000001148	apba1a	ENSDARG00000103848	100003938	106.026	61.0707	73.256	294.845	203.585	460.217	0.000887765	-1.99591
LL0000001149	apba1b	ENSDARG00000074328	565507	91.4354	144.437	240.01	777.495	448.856	392.538	0.00512264	-1.76624
LL0000001150	apba2a	ENSDARG00000063314	100330365	47.6631	86.2745	111.812	185.859	144.448	200.136	0.119044	-1.1099
LL0000001151	apba2b	ENSDARG00000060639	327160	82.6809	111.478	212.057	631.532	255.935	740.601	0.00406112	-2.00277
LL0000001152	APBA3	ENSDARG00000090675	449850	0	41.6832	2.89168	45.735	0	33.8395	0.847789	-0.836064
LL0000001153	apbb1	ENSDARG00000076560	565164	865.718	981.978	798.104	940	712.546	987.145	0.996899	0.0033307
LL0000001154	apbb1ip	ENSDARG00000016505	393607	83.6536	48.4688	93.4977	53.5197	60.106	51.2426	0.689563	0.452616
LL0000001155	apbb2b	ENSDARG00000099995	564990	4989.06	4375.76	3005.42	916.646	1313.61	1317.81	7.21869e-06	1.80177
LL0000001156	apbb3	ENSDARG00000053771	101883158	6.80902	5.81626	69.4004	72.9814	68.831	69.6126	0.418053	-1.36571
LL0000001157	apc	ENSDARG00000058868	386762	5114.54	5371.31	5555.89	2710.04	1860.38	2921.8	0.00414379	1.09837
LL0000001158	apc2	ENSDARG00000063007	565771	91.4354	44.5913	78.0754	253.975	90.1589	136.325	0.177552	-1.16609
LL0000001159	apcdd1l	ENSDARG00000075557	100001408	22.3725	34.8975	37.5919	203.375	172.562	127.623	7.65422e-05	-2.40808
LL0000001160	apeh	ENSDARG00000008703	100333019	313.215	278.211	427.969	196.563	300.53	177.899	0.383697	0.594794
LL0000001161	apela	ENSDARG00000094729	100536023	6.80902	0.969376	20.2418	22.381	24.2363	36.74	0.429506	-1.57247
LL0000001162	apex1	ENSDARG00000045843	406730	583.63	625.248	955.219	587.743	649.532	953.306	0.987698	-0.017542
LL0000001163	apex2	ENSDARG00000008472	393115	221.779	233.62	268.926	216.998	215.218	240.744	0.903852	0.106132
LL0000001164	aph1b	ENSDARG00000005612	386808	343.369	627.186	1016.91	518.654	564.22	707.728	0.895205	0.150502
LL0000001165	api5	ENSDARG00000033597	321676	1011.63	806.521	1218.36	867.992	986.901	905.931	0.853726	0.137322
LL0000001166	apip	ENSDARG00000003132	447941	310.297	547.698	381.702	229.648	404.261	465.051	0.868573	0.173832
LL0000001167	apln	ENSDARG00000053279	798375	3070.87	2845.12	2049.24	1822.59	2205.5	2260.48	0.554505	0.340978
LL0000001168	aplnr2	ENSDARG00000004447	793710	54.4721	15.51	16.3862	56.4389	27.1446	60.911	0.646947	-0.742631
LL0000001169	aplnra	ENSDARG00000002172	561935	4034.83	4274.95	2690.23	389.234	632.082	449.581	1.11096e-12	2.90273
LL0000001170	aplnrb	ENSDARG00000036670	565492	1281.07	1496.72	734.487	110.932	119.242	125.689	1.68773e-13	3.30298
LL0000001171	aplp1	ENSDARG00000098368	404233	201.352	292.752	351.821	1990.93	915.162	2040.04	5.49826e-07	-2.54767
LL0000001172	aplp2	ENSDARG00000054864	796801	4718.65	7029.92	6511.1	2521.26	2457.56	2503.15	0.000252394	1.28717
LL0000001173	apmap	ENSDARG00000017422	266637	149.798	322.802	502.189	509.897	467.275	518.227	0.46404	-0.617323
LL0000001174	apnl	ENSDARG00000090900	100002992	0	8.72439	6.74726	16.5424	17.4501	35.7731	0.312276	-2.17256
LL0000001175	apoa1a	ENSDARG00000012076	30355	85.5991	31.02	305.554	15.5694	146.387	1137.97	0.599757	-1.6225
LL0000001176	apoa1b	ENSDARG00000101324	100101640	634.211	1228.2	7759.35	618.882	1415.4	4146.78	0.821094	0.638453
LL0000001177	apoa2	ENSDARG00000015866	322327	334.615	915.091	4336.56	322.091	741.63	2571.8	0.83286	0.61973
LL0000001178	apoa4a	ENSDARG00000101160	550608	0	8.72439	52.0503	16.5424	48.4725	18.37	0.896015	-0.456109
LL0000001179	apoa4b.1	ENSDARG00000040298	322543	50.5813	20.3569	306.518	29.1926	114.395	667.121	0.586475	-1.10284
LL0000001180	apoa4b.2	ENSDARG00000094929	570354	24.3179	2.90813	179.284	27.2464	87.2506	551.1	0.412108	-1.68836
LL0000001181	apoba	ENSDARG00000042780	566465	59.3357	57.1932	62.6531	142.07	95.0062	139.225	0.107379	-1.07044
LL0000001182	apobb.1	ENSDARG00000022767	321166	69.0629	128.927	309.41	165.424	180.318	660.353	0.413675	-0.987534
LL0000001183	apobb.2	ENSDARG00000075016	100330435	30.1542	41.6832	26.0251	54.4928	45.5642	32.8726	0.756835	-0.441818
LL0000001184	apobec2a	ENSDARG00000018881	503736	79.7628	4.84688	13.4945	24.3271	21.3279	13.5358	0.763813	0.728849
LL0000001185	apobec2b	ENSDARG00000113992	567047	35.0178	34.8975	19.2779	9.73085	26.1752	17.4031	0.660927	0.74238
LL0000001186	apoc1	ENSDARG00000092170	570638	11.6726	279.18	658.34	202.402	544.831	1654.27	0.640987	-1.33914
LL0000001187	apoc2	ENSDARG00000092155	568972	10.6999	74.642	128.198	81.7392	88.22	349.997	0.381396	-1.28381
LL0000001188	apoc4	ENSDARG00000075614	570390	0	0	10.6028	3.89234	4.84725	13.5358	0.833806	-1.07048
LL0000001189	apoda.1	ENSDARG00000060345	767642	139.098	582.595	43.3752	27.2464	57.1976	91.8499	0.0796035	2.11754
LL0000001190	apoda.2	ENSDARG00000060350	100148022	19.4543	5.81626	81.931	28.2195	10.664	99.5847	0.894261	-0.369143
LL0000001191	apodb	ENSDARG00000057437	567972	120.617	107.601	126.27	38.9234	63.9838	297.787	0.929171	-0.176815
LL0000001192	apoea	ENSDARG00000102004	553587	12.6453	10.6631	86.7505	19.4617	35.8697	151.794	0.668359	-0.912113
LL0000001193	apoeb	ENSDARG00000040295	30314	3346.15	5357.74	6370.38	3236.48	7944.65	12452.9	0.460775	-0.648777
LL0000001194	apof	ENSDARG00000090980	793418	477.604	396.475	268.926	168.344	288.896	733.833	0.971223	-0.0594653
LL0000001195	apol1	ENSDARG00000007425	560340	150.771	194.845	155.187	108.012	132.815	164.363	0.730016	0.305604
LL0000001196	apom	ENSDARG00000076838	569714	35.0178	39.7444	133.981	8.75777	24.2363	57.0437	0.435125	1.21308
LL0000001197	apooa	ENSDARG00000104696	641319	91.4354	140.56	183.14	72.0083	168.684	135.358	0.918097	0.142671
LL0000001198	apoob	ENSDARG00000026444	449837	44.745	57.1932	176.393	210.186	93.0673	202.07	0.455903	-0.860288
LL0000001199	apool	ENSDARG00000039374	541537	176.062	197.753	296.879	134.286	135.723	204.004	0.529708	0.500741
LL0000001200	apopt1	ENSDARG00000092473	798687	230.534	219.079	140.729	131.367	196.799	211.738	0.907162	0.12878
LL0000001201	appa	ENSDARG00000104279	58083	16989.5	18562.6	9704.49	5769.42	4820.11	5918.04	0.000615344	1.455
LL0000001202	appb	ENSDARG00000055543	170846	5740.97	6693.54	4201.61	3236.48	3299.04	4890.28	0.327034	0.542021
LL0000001203	appbp2	ENSDARG00000007566	322995	2196.39	2451.55	2369.25	1880	2134.73	1769.32	0.585288	0.278817
LL0000001204	appl1		571540	105.053	48.4688	69.4004	87.5777	40.7169	25.1379	0.708052	0.539015
LL0000001205	appl2	ENSDARG00000100151	100000135	741.21	778.409	784.61	715.218	906.437	874.992	0.869869	-0.115711
LL0000001206	aprt	ENSDARG00000003519	393641	369.632	304.384	482.911	107.039	272.416	254.279	0.231367	0.868327
LL0000001207	aptx	ENSDARG00000027143	405797	22.3725	45.5607	39.5197	72.0083	42.6558	36.74	0.730786	-0.494555
LL0000001208	aqp10a	ENSDARG00000007086	436621	0	0	42.4113	12.6501	14.5418	11.6021	0.980938	0.128828
LL0000001209	aqp10b	ENSDARG00000058678	100034395	28.2088	0.969376	11.5667	29.1926	21.3279	4.83421	0.892185	-0.442124
LL0000001210	aqp11	ENSDARG00000100555	553476	291.815	148.315	142.656	276.356	234.607	258.147	0.650269	-0.400276
LL0000001211	aqp12	ENSDARG00000043279	436844	38.9087	29.0813	103.137	30.1656	33.9308	65.7452	0.817392	0.398362
LL0000001212	aqp1a.1	ENSDARG00000023713	335821	29914.9	31636.6	14469	897.185	628.204	1671.67	2.21244e-15	4.57157
LL0000001213	aqp1a.2	ENSDARG00000091027	559284	221.779	241.375	166.754	8.75777	40.7169	101.518	0.0465461	2.06051
LL0000001214	aqp3a	ENSDARG00000003808	406777	1313.17	1245.65	1533.56	1022.71	2304.38	3610.19	0.305802	-0.761435
LL0000001215	aqp3b	ENSDARG00000069518	568049	0.972717	61.0707	48.1947	17.5155	9.69451	12.5689	0.501784	1.47066
LL0000001216	aqp4	ENSDARG00000010565	445293	51.554	28.1119	29.8807	81.7392	70.7699	25.1379	0.617277	-0.697486
LL0000001217	aqp7	ENSDARG00000026787	334529	289.87	224.895	103.137	41.8427	9.69451	25.1379	0.000341464	3.01065
LL0000001218	aqp8a.1	ENSDARG00000045141	447923	4349.02	4471.73	3075.79	26.2733	62.0449	145.993	8.79509e-16	5.66584
LL0000001219	aqp8a.2	ENSDARG00000071592	563130	24.3179	22.2957	17.3501	11.677	22.2974	61.8779	0.768632	-0.583745
LL0000001220	aqp8b	ENSDARG00000089749	555598	13.618	4.84688	10.6028	17.5155	9.69451	18.37	0.783799	-0.649031
LL0000001222	aqp9b	ENSDARG00000053480	570191	184.816	203.569	436.644	4207.62	1069.3	225.274	0.0097593	-2.73746
LL0000001223	aqr	ENSDARG00000016775	393436	318.078	453.668	462.669	234.514	412.986	211.738	0.483803	0.522713
LL0000001224	ar	ENSDARG00000067976	100005148	359.905	255.915	230.371	343.499	391.658	396.405	0.520795	-0.419303
LL0000001225	araf	ENSDARG00000054533	403063	472.74	626.217	1094.02	759.98	845.361	797.644	0.896215	-0.131914
LL0000001226	arap1		101883993	14.5907	0.969376	21.2057	3.89234	7.75561	0	0.636749	1.6585
LL0000001227	arap1a	ENSDARG00000062221	571767	44.745	35.8669	88.6783	37.9503	38.778	67.6789	0.889748	0.229403
LL0000001228	arap3	ENSDARG00000076801	558931	3586.41	3360.83	1470.9	202.402	172.562	135.358	1.92464e-15	4.04404
LL0000001229	arcn1a	ENSDARG00000002792	266982	287.924	374.179	418.33	305.549	304.408	449.581	0.979623	0.0281804
LL0000001230	arcn1b	ENSDARG00000031214	399661	644.911	777.44	835.696	624.721	608.815	674.855	0.691975	0.242727
LL0000001231	areg	ENSDARG00000076853	101884611	108.944	153.161	31.8085	105.093	68.831	87.0157	0.920906	0.171626
LL0000001232	AREL1	ENSDARG00000100359	100332031	242.206	110.509	101.209	198.509	158.99	174.998	0.84464	-0.230386
LL0000001233	arf1	ENSDARG00000009484	114428	2937.6	3030.27	2079.12	772.63	1269.01	981.344	0.000728418	1.41247
LL0000001234	arf2a	ENSDARG00000014763	399477	4943.35	5626.26	6383.87	2973.75	3504.56	4214.46	0.114329	0.664944
LL0000001235	arf2b	ENSDARG00000016393	327026	2629.25	3875.57	2669.99	1232.9	1629.65	1339.08	0.00516218	1.12673
LL0000001236	arf3a	ENSDARG00000070539	445047	16.5362	31.02	14.4584	95.3624	60.106	187.567	0.00556478	-2.46777
LL0000001237	arf3b	ENSDARG00000036998	368822	0	0	13.4945	14.5963	10.664	1.93368	0.839054	-1.01034
LL0000001238	arf4a	ENSDARG00000103858	445196	519.431	595.197	417.366	235.487	353.85	265.881	0.0960512	0.841028
LL0000001239	arf4b	ENSDARG00000100339	550402	29.1815	71.7338	93.4977	22.381	102.762	6.76789	0.797548	0.559622
LL0000001240	arf5	ENSDARG00000070472	378724	2731.39	3929.85	3042.05	1781.72	2518.63	2133.82	0.21168	0.592718
LL0000001241	ARF5_1_of_many	ENSDARG00000074210	550265	52.5267	34.8975	85.7866	47.6812	76.5866	70.5794	0.914745	-0.169753
LL0000001242	arf6a	ENSDARG00000101626	336063	4168.09	3976.38	2390.46	614.017	1028.59	820.848	1.30731e-06	2.09642
LL0000001243	arf6b	ENSDARG00000052928	100003206	2391.91	2684.2	2220.81	641.263	977.206	1134.11	0.000584741	1.40649
LL0000001244	arfgap1	ENSDARG00000101616	100149572	611.839	916.061	501.225	263.706	394.567	500.824	0.192768	0.807831
LL0000001245	arfgap2	ENSDARG00000067601	641490	1672.1	1677.02	1435.24	936.108	1107.11	744.468	0.0643805	0.779257
LL0000001246	arfgap3	ENSDARG00000097583	402889	99.2171	156.07	264.107	149.855	193.89	257.18	0.864056	-0.210312
LL0000001247	arfgef1	ENSDARG00000063474	100329953	687.711	1036.26	1323.43	927.35	932.612	1025.82	0.934461	0.078631
LL0000001248	arfgef2	ENSDARG00000074702	100334572	180.925	444.944	892.566	662.671	599.121	551.1	0.841704	-0.255675
LL0000001249	arfgef3	ENSDARG00000077656	562652	68.0902	47.4994	62.6531	145.963	90.1589	123.756	0.161938	-1.01365
LL0000001250	arfip1	ENSDARG00000070055	100003895	652.693	824.939	674.726	325.984	376.147	453.449	0.0388657	0.897285
LL0000001251	arfip2a	ENSDARG00000059244	449664	125.48	146.376	269.89	445.673	239.454	203.037	0.408063	-0.713128
LL0000001252	arfip2b	ENSDARG00000056664	550342	0	0	14.4584	0.973085	0.969451	0.966842	1	2.3134
LL0000001253	arfrp1	ENSDARG00000057857	503602	775.255	595.197	348.93	333.768	437.222	416.709	0.453216	0.533689
LL0000001254	arg1	ENSDARG00000057429	570368	36.9632	19.3875	24.0974	56.4389	60.106	34.8063	0.438195	-0.911829
LL0000001255	arg2	ENSDARG00000039269	322614	2707.07	1574.27	2481.06	483.623	964.604	237.843	0.00208219	2.00388
LL0000001256	arglu1a	ENSDARG00000019223	406834	2418.17	3401.54	2979.4	2488.18	2195.81	3402.32	0.87854	0.121878
LL0000001257	arglu1b	ENSDARG00000018319	393131	429.941	703.767	942.688	1597.81	988.84	1604.96	0.0749406	-1.0134
LL0000001258	arhgap1	ENSDARG00000024324	550478	1205.2	1627.58	1522.95	999.359	1148.8	1675.54	0.809428	0.187944
LL0000001259	arhgap10	ENSDARG00000078326	692277	463.013	667.9	604.362	305.549	321.858	319.058	0.0468697	0.874552
LL0000001260	arhgap11a	ENSDARG00000100019	406608	274.306	140.56	335.435	280.249	356.758	201.103	0.892572	-0.159641
LL0000001261	arhgap12a	ENSDARG00000008548	563267	305.433	323.772	279.529	331.822	441.1	291.019	0.769979	-0.227493
LL0000001262	arhgap12b	ENSDARG00000026482	393848	208.161	368.363	463.633	800.849	621.418	562.702	0.112693	-0.93227
LL0000001263	arhgap15	ENSDARG00000062349	100003547	126.453	56.2238	163.862	31.1387	48.4725	89.9163	0.335533	1.03144
LL0000001264	arhgap17a	ENSDARG00000020488	550254	1266.48	1954.26	579.3	211.159	259.813	269.749	3.66771e-05	2.359
LL0000001265	arhgap17b	ENSDARG00000062263	100141341	266.524	296.629	247.721	62.2775	63.9838	111.187	0.000932459	1.77178
LL0000001266	arhgap18	ENSDARG00000074740	100004252	142.989	98.8764	151.331	117.743	108.578	41.5742	0.610585	0.553652
LL0000001267	arhgap19	ENSDARG00000083189	100537002	204.27	266.578	259.288	260.787	422.681	296.82	0.548192	-0.425028
LL0000001268	arhgap20	ENSDARG00000089326	796434	148.826	71.7338	144.584	322.091	189.043	142.126	0.319338	-0.839155
LL0000001269	arhgap20b	ENSDARG00000093708	100002649	1255.78	1280.55	928.23	168.344	276.293	120.855	5.50277e-08	2.6151
LL0000001270	arhgap21a	ENSDARG00000104295	556095	226.643	354.792	533.997	1239.71	1334.93	1458	9.7453e-05	-1.85408
LL0000001271	arhgap21b	ENSDARG00000075673	326745	748.019	796.827	798.104	718.137	885.109	1032.59	0.805932	-0.169939
LL0000001272	arhgap22	ENSDARG00000021255	562503	112.835	104.693	104.101	143.044	109.548	200.136	0.555165	-0.493283
LL0000001273	ARHGAP22_1_of_many	ENSDARG00000076434	555573	115.753	126.019	186.995	567.309	442.07	797.644	2.0048e-05	-2.07529
LL0000001274	arhgap23a	ENSDARG00000052950	100006233	998.007	1188.46	1289.69	945.839	1328.15	1512.14	0.878275	-0.123232
LL0000001275	arhgap23b	ENSDARG00000026840	562244	19.4543	70.7645	86.7505	165.424	114.395	28.0384	0.607398	-0.798634
LL0000001276	arhgap24	ENSDARG00000100973	100005116	196.489	336.374	187.959	209.213	203.585	234.943	0.878728	0.154211
LL0000001277	arhgap25	ENSDARG00000061784	562468	5.8363	52.3463	85.7866	17.5155	31.9919	44.4747	0.772958	0.615353
LL0000001278	arhgap27	ENSDARG00000104255	564211	254.852	307.292	355.677	244.244	165.776	279.417	0.578231	0.412808
LL0000001279	arhgap27l	ENSDARG00000061798	566523	2808.23	3328.84	1877.67	137.205	254.966	419.609	2.52376e-09	3.30345
LL0000001280	arhgap28	ENSDARG00000101350	492794	35.0178	52.3463	34.7002	29.1926	31.0224	9.66842	0.58888	0.804728
LL0000001281	arhgap29a	ENSDARG00000026329	564805	3700.21	2888.74	2519.62	186.832	160.929	157.595	2.34562e-30	4.17187
LL0000001282	arhgap29b	ENSDARG00000017748	378998	1630.27	2118.09	919.555	397.019	529.32	649.718	0.00255973	1.56644
LL0000001283	arhgap31	ENSDARG00000059472	101885883	12867.1	10816.3	6624.84	951.677	1380.5	670.988	2.49246e-12	3.33516
LL0000001284	arhgap32a	ENSDARG00000075334	562449	57.3903	138.621	100.245	247.164	191.951	329.693	0.0381175	-1.37575
LL0000001285	arhgap32b	ENSDARG00000074184	569434	90.4626	253.007	527.25	1193	1033.43	1194.05	0.00718955	-1.97387
LL0000001286	arhgap33	ENSDARG00000011333	569720	295.706	364.485	730.632	678.24	823.064	663.253	0.377489	-0.638098
LL0000001287	arhgap35a	ENSDARG00000062577	100004299	708.138	1209.78	1125.83	1126.83	1036.34	1065.46	0.923977	-0.0850643
LL0000001288	arhgap35b	ENSDARG00000060297	564565	594.33	814.276	1052.57	930.269	648.563	1142.81	0.877633	-0.145115
LL0000001289	arhgap36	ENSDARG00000059672	559813	320.996	213.263	203.382	197.536	254.966	176.932	0.802263	0.228834
LL0000001290	arhgap39	ENSDARG00000100007	101884459	3.89087	39.7444	50.1225	150.828	119.242	145.993	0.0495408	-2.14957
LL0000001291	arhgap42a	ENSDARG00000056619	566275	818.055	730.91	384.594	429.131	356.758	356.765	0.208863	0.758857
LL0000001292	arhgap42b	ENSDARG00000010654	569534	128.399	34.8975	36.628	72.9814	55.2587	40.6073	0.893213	0.243666
LL0000001293	arhgap44	ENSDARG00000104549	100333556	10.6999	2.90813	27.9529	37.9503	47.5031	36.74	0.313861	-1.55552
LL0000001294	arhgap4a	ENSDARG00000039265	393416	138.126	29.0813	196.634	33.0849	81.4339	100.552	0.605866	0.758482
LL0000001295	arhgap4b	ENSDARG00000015003	561231	1089.44	622.34	1286.8	338.634	389.719	473.752	0.00858569	1.31871
LL0000001296	arhgap5	ENSDARG00000061294	795752	1115.71	1149.68	1221.25	855.342	1123.59	1091.56	0.775207	0.183361
LL0000001297	ARHGAP6	ENSDARG00000111170	101882360	82.6809	118.264	50.1225	23.354	59.1365	16.4363	0.227754	1.34362
LL0000001298	arhgdia	ENSDARG00000043795	406770	8822.54	12655.2	9975.34	1425.57	3229.24	3833.53	0.000224272	1.88964
LL0000001299	arhgdig	ENSDARG00000004034	394132	5861.59	5436.26	5593.48	1044.12	1309.73	2398.73	7.38627e-05	1.82949
LL0000001300	arhgef10	ENSDARG00000077788	334278	693.547	683.41	810.635	186.832	198.737	146.96	5.01769e-08	2.03844
LL0000001301	arhgef10la	ENSDARG00000088630	799435	69.0629	118.264	141.692	623.748	430.436	563.669	3.10533e-06	-2.29773
LL0000001302	arhgef10lb	ENSDARG00000074244	567649	27.2361	16.4794	24.0974	61.3044	63.9838	72.5131	0.0687044	-1.54446
LL0000001303	arhgef11	ENSDARG00000052482	565268	592.384	573.871	873.288	799.876	725.149	818.915	0.784807	-0.200671
LL0000001304	arhgef12a	ENSDARG00000030532	562455	670.202	701.828	747.018	409.669	599.121	451.515	0.290666	0.537147
LL0000001305	arhgef12b	ENSDARG00000100913	571031	2437.63	3342.41	2576.49	582.878	793.011	668.088	8.6882e-09	2.03152
LL0000001306	arhgef15	ENSDARG00000100293	101882903	0	23.265	25.0612	141.097	66.8921	33.8395	0.173946	-2.32286
LL0000001307	arhgef16	ENSDARG00000077114	567180	87.5445	113.417	145.548	82.7122	198.737	234.943	0.570579	-0.575565
LL0000001308	ARHGEF17	ENSDARG00000101644	100002227	396.868	259.793	184.104	469.027	547.74	525.962	0.131779	-0.875761
LL0000001309	arhgef18a	ENSDARG00000011157	407987	129.371	136.682	175.429	170.29	236.546	266.848	0.365974	-0.609702
LL0000001310	arhgef18b	ENSDARG00000042308	562264	225.67	236.528	294.952	296.791	328.644	281.351	0.719213	-0.260151
LL0000001311	arhgef19	ENSDARG00000078853	569202	0	5.81626	0	17.5155	29.0835	5.80105	0.279357	-3.17159
LL0000001312	arhgef1a	ENSDARG00000040380	368266	2471.67	2063.8	1633.8	220.89	287.927	313.257	1.68706e-14	2.90773
LL0000001313	arhgef1b	ENSDARG00000055837	557983	3198.29	3240.62	3203.02	1898.49	1752.77	1431.89	0.0085538	0.923605
LL0000001314	arhgef2	ENSDARG00000075819	561276	1360.83	1522.89	1904.65	1328.26	1198.24	1369.05	0.59998	0.297717
LL0000001315	arhgef25b	ENSDARG00000014465	569561	110.89	67.8563	165.79	284.141	149.295	224.307	0.233866	-0.9328
LL0000001316	arhgef28	ENSDARG00000060415	559941	189.68	118.264	50.1225	177.102	175.471	77.3473	0.860231	-0.26389
LL0000001317	arhgef3	ENSDARG00000013834	570228	550.558	490.504	250.612	67.1429	37.8086	21.2705	4.37374e-07	3.35537
LL0000001318	arhgef33	ENSDARG00000097964	559216	66.1447	60.1013	28.9168	63.2505	59.1365	202.07	0.358773	-1.06438
LL0000001319	arhgef37	ENSDARG00000002463	101883655	176.062	221.018	165.79	223.81	233.638	176.932	0.847789	-0.172542
LL0000001320	arhgef38	ENSDARG00000079377	100317614	42.7995	23.265	56.8698	68.116	48.4725	123.756	0.388115	-0.967178
LL0000001321	arhgef39	ENSDARG00000013476	492469	237.343	191.936	169.645	88.5508	93.0673	68.6458	0.0221779	1.25893
LL0000001322	arhgef3l	ENSDARG00000037554	553761	226.643	77.5501	302.663	33.0849	40.7169	121.822	0.104807	1.6332
LL0000001323	arhgef4	ENSDARG00000012914	559017	520.403	677.594	833.768	1257.23	1368.86	1792.52	0.0104774	-1.12085
LL0000001324	arhgef40	ENSDARG00000078979	100151026	42.7995	85.3051	37.5919	87.5777	92.0978	26.1047	0.854043	-0.312532
LL0000001325	arhgef5		100537160	108.944	222.957	221.696	180.021	343.186	592.674	0.223315	-1.01126
LL0000001326	arhgef6	ENSDARG00000006683	558288	500.949	445.913	681.473	513.789	758.111	824.716	0.604688	-0.364659
LL0000001327	arhgef7a	ENSDARG00000006299	553493	160.498	195.814	473.272	847.557	479.878	801.512	0.047804	-1.35963
LL0000001328	arhgef7b	ENSDARG00000073848	494081	3340.31	4231.33	3541.35	769.71	702.852	734.8	3.58565e-14	2.33185
LL0000001329	arhgef9a	ENSDARG00000061746	559868	72.9537	81.4276	200.49	199.482	118.273	269.749	0.477892	-0.727223
LL0000001330	arhgef9b	ENSDARG00000078624	560923	5231.27	5019.43	2936.99	164.451	121.181	327.759	1.39026e-15	4.4262
LL0000001331	arid1aa	ENSDARG00000101710	100141358	1355.97	1683.81	2496.49	1927.68	2089.17	1928.85	0.905642	-0.102925
LL0000001332	arid1ab	ENSDARG00000101891	568161	1587.47	1849.57	2573.6	2143.71	2445.92	2634.64	0.687335	-0.265328
LL0000001333	arid1b	ENSDARG00000092503	569589	1591.36	1678.96	1613.56	1362.32	1298.09	1803.16	0.851885	0.129825
LL0000001334	arid2	ENSDARG00000007413	566352	1023.3	1148.71	1272.34	1051.91	1172.07	1064.49	0.929171	0.0668246
LL0000001335	arid3a	ENSDARG00000070843	562799	706.192	696.012	1607.78	597.474	901.589	728.999	0.610766	0.433977
LL0000001336	arid3b	ENSDARG00000104034	571249	1649.73	2925.58	1538.38	997.412	1222.48	1068.36	0.0786516	0.894719
LL0000001337	arid3c	ENSDARG00000067729	569444	3328.64	3248.38	1592.35	644.182	825.972	1111.87	0.000993846	1.66171
LL0000001338	arid4a	ENSDARG00000043873	327404	3066	3057.41	2550.46	1672.73	2070.75	1735.48	0.089583	0.662772
LL0000001339	arid5a	ENSDARG00000077120	100462698	45.7177	40.7138	49.1586	52.5466	33.9308	29.9721	0.886968	0.219651
LL0000001340	arid5b	ENSDARG00000037196	100536827	288.897	266.578	452.066	433.023	561.312	532.73	0.318101	-0.599893
LL0000001341	arid6	ENSDARG00000069988	572528	171.198	80.4582	182.176	48.6543	48.4725	194.335	0.685992	0.573774
LL0000001342	arih1	ENSDARG00000003616	327005	791.791	889.887	1093.06	1144.35	1112.93	1201.78	0.566472	-0.318019
LL0000001343	arih1l	ENSDARG00000036870	405859	834.591	599.075	697.859	470.973	658.257	562.702	0.597735	0.333202
LL0000001344	arih2	ENSDARG00000012848	406417	1014.54	930.601	837.624	602.34	669.891	565.602	0.160244	0.59851
LL0000001345	arl1	ENSDARG00000101680	436746	597.248	872.439	1186.55	606.232	875.414	703.861	0.728702	0.281431
LL0000001346	arl11	ENSDARG00000036637	324689	106.026	67.8563	45.303	53.5197	59.1365	91.8499	0.95183	0.0998632
LL0000001347	arl13a	ENSDARG00000052575	793658	25.2906	63.0095	125.306	260.787	212.31	61.8779	0.243895	-1.32437
LL0000001348	arl13b	ENSDARG00000012763	286784	321.969	209.385	207.237	440.808	261.752	246.545	0.678074	-0.361793
LL0000001349	arl14	ENSDARG00000063223	556921	51.554	65.9176	24.0974	74.9276	47.5031	38.6737	0.915462	-0.186524
LL0000001350	arl14ep	ENSDARG00000001210	751672	354.069	404.23	544.6	309.441	474.061	653.585	0.891479	-0.141422
LL0000001351	arl15a	ENSDARG00000076040	567657	12.6453	13.5713	11.5667	97.3085	73.6783	64.7784	0.000701799	-2.64155
LL0000001352	arl15b	ENSDARG00000057995	560030	9.72717	32.9588	33.7363	41.8427	24.2363	37.7068	0.811735	-0.44137
LL0000001353	arl16	ENSDARG00000059498	100037345	64.1993	120.203	75.1837	255.921	149.295	246.545	0.0402178	-1.32812
LL0000001354	arl2	ENSDARG00000069496	449774	394.923	518.616	266.035	180.994	279.202	541.431	0.844052	0.235883
LL0000001355	arl2bp	ENSDARG00000025383	393976	55.4448	139.59	86.7505	156.667	142.509	158.562	0.416357	-0.699897
LL0000001356	arl3	ENSDARG00000071409	797451	308.351	601.013	309.41	481.677	317.01	417.676	0.99912	0.00285884
LL0000001357	arl3l1	ENSDARG00000111106	393666	0	77.5501	41.4474	506.977	267.568	139.225	0.294355	-2.94086
LL0000001358	arl3l2	ENSDARG00000015404	393692	0	19.3875	26.989	221.863	127.968	65.7452	0.0241195	-3.1633
LL0000001359	arl4aa	ENSDARG00000099918	393834	1635.14	1977.53	1199.08	238.406	444.008	369.333	9.39507e-07	2.19375
LL0000001360	arl4ab	ENSDARG00000033182	338267	1470.75	1627.58	1842.97	142.07	254.966	250.412	1.15069e-12	2.93202
LL0000001361	arl4ca	ENSDARG00000057606	550444	179.953	149.284	188.923	185.859	222.004	213.672	0.74097	-0.26244
LL0000001362	arl4cb	ENSDARG00000032708	406531	122.562	128.927	233.262	292.899	338.338	437.012	0.0539176	-1.13987
LL0000001363	arl4d	ENSDARG00000045074	323573	319.051	346.067	515.683	471.946	633.051	426.377	0.605146	-0.37503
LL0000001364	arl5a	ENSDARG00000018627	436611	518.458	463.362	411.583	218.944	375.177	466.984	0.61589	0.393008
LL0000001365	arl5c	ENSDARG00000035719	393819	5836.3	6239.87	3245.43	593.582	1206	321.958	3.69923e-06	2.85239
LL0000001366	arl6	ENSDARG00000032056	494134	148.826	117.295	75.1837	286.087	109.548	100.552	0.640515	-0.53983
LL0000001367	arl6ip1	ENSDARG00000054578	394087	6766.22	6576.25	5405.52	2629.28	3464.82	4103.28	0.0325009	0.878535
LL0000001368	arl6ip4	ENSDARG00000105036	553796	262.633	299.537	436.644	280.249	351.911	495.023	0.859077	-0.17442
LL0000001369	arl6ip5a	ENSDARG00000077044	450076	131.317	117.295	157.115	74.9276	66.8921	50.2758	0.0984552	1.07876
LL0000001370	arl6ip5b	ENSDARG00000016238	436790	697.438	862.745	694.004	456.377	476.97	615.878	0.282231	0.541047
LL0000001371	arl6ip6	ENSDARG00000071013	100037347	468.849	563.208	617.856	179.048	288.896	273.616	0.0143899	1.15374
LL0000001372	arl8	ENSDARG00000094709	327551	189.68	316.986	560.022	668.51	517.687	358.698	0.56035	-0.53432
LL0000001373	arl8a	ENSDARG00000078686	567222	957.153	1193.3	1671.39	1662.03	1276.77	1831.2	0.64771	-0.319706
LL0000001374	arl8ba	ENSDARG00000006915	337424	549.585	731.879	672.798	317.226	396.505	619.745	0.395922	0.551415
LL0000001375	arl8bb	ENSDARG00000070318	562445	387.141	514.739	519.539	228.675	386.811	256.213	0.221469	0.705434
LL0000001376	arl9	ENSDARG00000071881	751670	206.216	248.16	223.623	200.456	147.357	87.9826	0.406219	0.637695
LL0000001377	armc1	ENSDARG00000013861	494066	495.113	443.974	568.698	523.52	531.259	632.314	0.821664	-0.162105
LL0000001378	armc10	ENSDARG00000062960	557740	114.781	170.61	191.815	175.155	297.621	167.264	0.638631	-0.423509
LL0000001379	armc1l	ENSDARG00000020887	321240	405.623	558.361	644.845	321.118	507.023	539.498	0.783931	0.234325
LL0000001380	armc2	ENSDARG00000022660	555846	159.526	146.376	41.4474	149.855	45.5642	115.054	0.929812	0.161875
LL0000001381	armc3	ENSDARG00000074708	560136	10.6999	3.87751	18.314	36.9772	21.3279	4.83421	0.693587	-0.940533
LL0000001382	armc4	ENSDARG00000055128	799229	26.2633	40.7138	29.8807	82.7122	62.0449	49.3089	0.300385	-1.00254
LL0000001383	armc5	ENSDARG00000078083	569910	112.835	111.478	105.064	220.89	154.143	116.988	0.461005	-0.578943
LL0000001384	ARMC6	ENSDARG00000103770	555425	320.996	116.325	127.234	84.6584	114.395	79.281	0.231123	1.02025
LL0000001385	armc7	ENSDARG00000061197	767659	236.37	117.295	83.8588	69.0891	93.0673	130.524	0.595096	0.57993
LL0000001386	armc8	ENSDARG00000062258	571528	180.925	152.192	315.193	171.263	182.257	179.833	0.772046	0.281645
LL0000001387	armc9	ENSDARG00000087299	100334308	106.999	201.63	94.4616	169.317	201.646	167.264	0.660829	-0.417129
LL0000001388	armh1	ENSDARG00000029859	100000984	4.86358	17.4488	16.3862	42.8158	27.1446	42.541	0.251166	-1.53934
LL0000001389	armh3	ENSDARG00000104285	393591	845.291	676.625	552.311	383.396	445.947	407.04	0.111727	0.746428
LL0000001390	armt1	ENSDARG00000055676	541518	275.279	250.099	388.449	211.159	224.913	225.274	0.474514	0.466542
LL0000001391	arnt	ENSDARG00000021855	493634	2057.3	1341.62	581.228	318.199	597.182	484.388	0.0233231	1.50761
LL0000001392	arnt2	ENSDARG00000103697	64277	1234.38	1204.93	1037.15	1217.33	1287.43	2109.65	0.516575	-0.408536
LL0000001393	arntl1a	ENSDARG00000006791	58098	615.73	293.721	192.779	377.557	184.196	327.759	0.796864	0.309313
LL0000001394	arntl1b	ENSDARG00000035732	352935	656.584	470.147	359.533	674.348	328.644	305.522	0.869159	0.183765
LL0000001395	arntl2	ENSDARG00000041381	58099	150.771	120.203	118.559	184.886	106.64	69.6126	0.938797	0.109238
LL0000001396	arpc1a	ENSDARG00000008383	394243	2864.65	4029.7	2364.43	961.408	1096.45	1656.2	0.00505611	1.31782
LL0000001397	arpc1b	ENSDARG00000027063	335474	2251.84	2143.29	2978.43	553.685	670.86	858.555	2.02126e-06	1.82362
LL0000001398	arpc2	ENSDARG00000075989	327068	2898.7	3801.89	4246.92	1076.23	1915.63	2303.02	0.0419583	1.04793
LL0000001399	arpc3	ENSDARG00000057882	415204	4620.4	4951.57	3175.07	776.522	1448.36	2436.44	0.0144106	1.45134
LL0000001400	arpc4	ENSDARG00000054063	114456	705.22	851.112	1688.74	599.421	806.583	1338.11	0.825397	0.241917
LL0000001401	arpc4l	ENSDARG00000058225	445305	1524.25	1995.95	1689.71	713.271	875.414	1237.56	0.05892	0.882361
LL0000001402	arpc5a	ENSDARG00000039142	336504	3690.49	4780.96	3382.3	611.098	1047.01	1746.12	0.000732706	1.79994
LL0000001403	arpc5b	ENSDARG00000019062	399482	766.501	1091.52	1293.55	525.466	901.589	1591.42	0.962441	0.0622448
LL0000001404	arpc5la	ENSDARG00000041720	393550	272.361	438.158	323.868	179.048	233.638	308.422	0.466372	0.520466
LL0000001405	arpc5lb	ENSDARG00000035433	556104	333.642	595.197	505.081	234.514	343.186	496.957	0.623624	0.416077
LL0000001406	arpin	ENSDARG00000041085	550477	224.698	265.609	189.887	85.6315	141.54	176.932	0.290438	0.751155
LL0000001407	arpp19a	ENSDARG00000032532	393603	1664.32	2036.66	1455.48	1052.88	1257.38	1870.84	0.673202	0.302491
LL0000001408	arpp19b	ENSDARG00000039880	393947	647.829	568.054	780.754	403.83	677.646	736.733	0.882706	0.135048
LL0000001409	arpp21	ENSDARG00000061081	564134	151.744	54.2851	160.97	126.501	172.562	165.33	0.777357	-0.339564
LL0000001410	arr3a	ENSDARG00000056511	436678	57.3903	332.496	225.551	3280.27	2042.63	841.152	4.05072e-05	-3.32417
LL0000001411	arr3b	ENSDARG00000098475	796867	117.699	254.946	202.418	2609.81	1009.2	1191.15	1.46618e-07	-3.06426
LL0000001412	arrb1	ENSDARG00000043241	553266	182.871	224.895	67.4726	102.174	85.3117	145.993	0.657121	0.510989
LL0000001413	arrb2a	ENSDARG00000039215	321378	262.633	195.814	337.363	394.1	241.393	473.752	0.547141	-0.479064
LL0000001414	arrb2b	ENSDARG00000011545	394099	3485.24	3965.72	3128.8	1095.69	1417.34	1728.71	0.000545392	1.31857
LL0000001415	arrdc1a	ENSDARG00000068148	100006005	158.553	252.038	118.559	122.609	203.585	209.805	0.989589	-0.0186023
LL0000001416	arrdc1b	ENSDARG00000079839	570029	442.586	191.936	283.385	180.021	168.684	174.031	0.225733	0.812245
LL0000001417	arrdc2	ENSDARG00000020761	335206	1178.93	1522.89	1134.5	680.187	1033.43	1590.45	0.813999	0.215468
LL0000001418	arrdc3a	ENSDARG00000052690	566685	4813	8055.52	2953.37	2687.66	1787.67	2534.09	0.0418026	1.17455
LL0000001419	arrdc3b	ENSDARG00000036028	447866	3035.85	2351.71	2371.18	1458.65	1418.31	2172.49	0.208687	0.619687
LL0000001420	arsa	ENSDARG00000042270	541416	20.427	133.774	151.331	111.905	141.54	131.49	0.840329	-0.333221
LL0000001421	ARSB	ENSDARG00000108788	100538007	39.8814	4.84688	2.89168	20.4348	5.81671	0	0.824103	0.859226
LL0000001422	arsg	ENSDARG00000101715	564790	10.6999	21.3263	53.0142	96.3354	78.5255	43.5079	0.266669	-1.36024
LL0000001423	arsh	ENSDARG00000002299	100332997	170.225	273.364	265.071	205.321	338.338	177.899	0.984074	-0.0259945
LL0000001424	arsia	ENSDARG00000077606	100329483	58.363	10.6631	28.9168	57.412	93.0673	51.2426	0.436076	-1.04246
LL0000001425	arsib	ENSDARG00000117075	563783	13.618	18.4181	18.314	61.3044	33.9308	22.2374	0.350194	-1.22209
LL0000001426	arsj	ENSDARG00000077590	559800	6.80902	63.0095	24.0974	75.9006	132.815	173.065	0.0716393	-2.02327
LL0000001427	arsk	ENSDARG00000059714	562412	60.3084	72.7032	56.8698	46.7081	54.2892	50.2758	0.781247	0.327916
LL0000001428	art4	ENSDARG00000078178	555597	6.80902	5.81626	2.89168	14.5963	9.69451	2.90052	0.793931	-0.809368
LL0000001429	artn	ENSDARG00000096252	101882107	20.427	10.6631	1.92779	29.1926	14.5418	0	0.92315	-0.405573
LL0000001431	artnb	ENSDARG00000093714	101883396	0.972717	46.5301	59.7614	145.963	114.395	118.922	0.21506	-1.82194
LL0000001432	arv1	ENSDARG00000074757	568203	83.6536	174.488	142.656	162.505	154.143	149.86	0.837459	-0.218983
LL0000001433	arvcfa	ENSDARG00000074329	572216	86.5718	31.02	8.67505	144.99	40.7169	124.723	0.370281	-1.29795
LL0000001434	arvcfb	ENSDARG00000061688	564669	2961.92	3142.72	2700.83	1089.86	1281.61	1411.59	0.000270065	1.21884
LL0000001435	arxa	ENSDARG00000058011	30657	71.981	17.4488	10.6028	96.3354	42.6558	147.927	0.257377	-1.52039
LL0000001436	arxb	ENSDARG00000101523	100329907	77.8173	26.1732	3.85558	28.2195	17.4501	40.6073	0.903524	0.321748
LL0000001437	as3mt	ENSDARG00000027572	664699	121.59	157.039	91.5699	85.6315	180.318	173.065	0.834793	-0.246034
LL0000001438	asah1a	ENSDARG00000037091	450068	122.562	109.54	187.959	119.689	129.906	161.463	0.980822	0.0312897
LL0000001439	asah1b	ENSDARG00000034817	393549	212.052	340.251	550.384	199.482	419.772	411.875	0.944643	0.0968138
LL0000001440	asah2	ENSDARG00000012829	493602	33.0724	1.93875	14.4584	17.5155	4.84725	13.5358	0.880357	0.462556
LL0000001441	asap1a	ENSDARG00000029463	100170829	1663.35	1626.61	1767.78	1313.67	1276.77	1620.43	0.63128	0.264377
LL0000001442	asap1b	ENSDARG00000039729	565859	2114.69	2078.34	1902.73	1089.86	778.469	752.203	0.00110907	1.21796
LL0000001443	asap2a	ENSDARG00000010181	570669	2176.94	2059.92	1530.66	439.835	408.139	462.15	5.58244e-10	2.13824
LL0000001444	asap2b	ENSDARG00000019564	560581	143.962	158.008	88.6783	96.3354	92.0978	109.253	0.67715	0.392015
LL0000001445	asap3	ENSDARG00000021896	664764	826.809	1133.2	493.514	1007.14	1745.01	742.534	0.554989	-0.510315
LL0000001446	asb1	ENSDARG00000026635	554673	33.0724	13.5713	10.6028	37.9503	26.1752	18.37	0.789945	-0.527277
LL0000001447	asb10	ENSDARG00000099461	559467	0	23.265	3.85558	21.4079	7.75561	7.73473	0.914152	-0.444068
LL0000001448	asb11	ENSDARG00000056561	791758	0	1.93875	10.6028	17.5155	7.75561	13.5358	0.599724	-1.62882
LL0000001449	asb12a	ENSDARG00000017086	322927	383.25	586.473	525.322	239.379	391.658	591.707	0.763813	0.290052
LL0000001450	asb12b	ENSDARG00000037558	445507	11.6726	23.265	5.78336	27.2464	21.3279	20.3037	0.698981	-0.758383
LL0000001451	asb13a.1	ENSDARG00000079698	436801	61.2811	65.9176	68.4365	96.3354	87.2506	109.253	0.480987	-0.581931
LL0000001452	asb13a.2	ENSDARG00000045765	563551	6.80902	15.51	39.5197	17.5155	21.3279	14.5026	0.936789	0.213396
LL0000001453	asb13b	ENSDARG00000089833	556808	38.9087	77.5501	49.1586	95.3624	111.487	99.5847	0.285909	-0.887708
LL0000001454	asb14a	ENSDARG00000008473	568371	11.6726	2.90813	8.67505	14.5963	19.389	14.5026	0.622456	-1.06011
LL0000001455	asb14b	ENSDARG00000087741	100535284	81.7082	20.3569	8.67505	21.4079	22.2974	14.5026	0.637128	0.92777
LL0000001456	asb15a	ENSDARG00000045633	100151067	33.0724	31.9894	0.963894	41.8427	29.0835	58.9773	0.645904	-0.976542
LL0000001457	asb15b	ENSDARG00000045863	568579	49.6085	3.87751	0	11.677	9.69451	5.80105	0.787615	0.976897
LL0000001458	asb16	ENSDARG00000056468	678621	21.3998	19.3875	23.1335	23.354	10.664	4.83421	0.73362	0.718548
LL0000001459	asb18	ENSDARG00000114572	792746	0	14.5406	4.81947	53.5197	21.3279	14.5026	0.312056	-2.2062
LL0000001460	asb2a.1	ENSDARG00000096748	567986	30.1542	21.3263	0	46.7081	37.8086	21.2705	0.680364	-1.03924
LL0000001461	asb2b	ENSDARG00000102490	402848	73.9265	28.1119	30.8446	100.228	92.0978	111.187	0.186261	-1.19177
LL0000001462	asb3	ENSDARG00000005246	334210	201.352	241.375	212.057	147.909	168.684	176.932	0.544872	0.407879
LL0000001463	asb4	ENSDARG00000034988	550321	10.6999	22.2957	137.837	77.8468	81.4339	89.9163	0.784439	-0.544547
LL0000001464	asb5a	ENSDARG00000097938	550441	0	16.4794	28.9168	23.354	19.389	21.2705	0.877626	-0.495576
LL0000001465	asb5b	ENSDARG00000053222	550449	107.972	44.5913	84.8227	232.567	206.493	332.593	0.00754386	-1.70076
LL0000001466	asb6	ENSDARG00000007125	553600	364.769	238.467	145.548	164.451	187.104	265.881	0.797263	0.27819
LL0000001467	asb7	ENSDARG00000006494	405798	891.981	805.552	580.264	626.667	608.815	889.494	0.912203	0.100171
LL0000001468	asb8	ENSDARG00000003383	327200	342.396	403.261	271.818	318.199	255.935	323.892	0.828043	0.180147
LL0000001469	ascc1	ENSDARG00000077760	550273	390.059	354.792	535.925	66.1698	167.715	215.606	0.0244545	1.51061
LL0000001470	ascc2	ENSDARG00000013058	393414	581.685	379.995	231.335	178.075	318.949	285.218	0.46234	0.608879
LL0000001471	ascc3	ENSDARG00000086678	100332599	119.644	64.9482	40.4836	69.0891	90.1589	48.3421	0.946989	0.11659
LL0000001472	ascl1a	ENSDARG00000038386	30466	77.8173	167.702	480.983	826.149	1068.33	776.374	0.0185823	-1.8782
LL0000001473	ascl1b	ENSDARG00000101628	30478	28.2088	82.397	86.7505	194.617	193.89	547.232	0.00574487	-2.24523
LL0000001474	asf1ba	ENSDARG00000101037	386897	324.887	484.688	545.564	362.961	679.585	529.829	0.816494	-0.214493
LL0000001475	asf1bb	ENSDARG00000043713	792029	473.713	515.708	414.474	399.938	475.031	561.735	0.972217	-0.0333498
LL0000001476	ash1l	ENSDARG00000070981	563799	2037.84	2197.58	1734.05	1694.14	2021.31	1691.01	0.828679	0.142916
LL0000001477	ash2l	ENSDARG00000060392	558193	657.556	898.612	1129.68	642.236	936.49	901.096	0.899208	0.115151
LL0000001478	asic1a	ENSDARG00000008329	791696	55.4448	13.5713	8.67505	101.201	64.9532	45.4416	0.288794	-1.44572
LL0000001479	asic1b	ENSDARG00000101866	407672	13.618	87.2439	141.692	279.275	236.546	378.035	0.0555313	-1.88162
LL0000001480	asic1c	ENSDARG00000098428	407670	7.78173	54.2851	8.67505	82.7122	90.1589	153.728	0.0636575	-2.20695
LL0000001481	asic2	ENSDARG00000006849	407669	22.3725	32.9588	90.606	182.94	70.7699	203.037	0.100209	-1.64586
LL0000001482	asic4a	ENSDARG00000025162	407668	0.972717	3.87751	57.8336	100.228	52.3503	95.7173	0.285909	-1.98556
LL0000001483	asic4b	ENSDARG00000004243	407667	47.6631	0.969376	35.6641	51.5735	35.8697	35.7731	0.825887	-0.547644
LL0000001484	asip1	ENSDARG00000077858	798574	10.6999	28.1119	32.7724	228.675	475.031	350.963	4.98704e-09	-3.88067
LL0000001485	asip2b	ENSDARG00000114760	796595	83.6536	119.233	92.5338	819.338	1685.88	1965.59	1.07994e-14	-3.91969
LL0000001486	asl	ENSDARG00000033361	393423	170.225	138.621	131.09	83.6853	81.4339	101.518	0.281369	0.722359
LL0000001487	asmt	ENSDARG00000098249	100141344	9.72717	79.4889	59.7614	121.636	129.906	87.0157	0.333583	-1.1842
LL0000001488	asmt2	ENSDARG00000070874	568256	157.58	98.8764	130.126	164.451	135.723	129.557	0.885431	-0.152658
LL0000001489	asmtl	ENSDARG00000021433	324134	249.015	161.886	109.884	296.791	255.935	238.81	0.429506	-0.604025
LL0000001490	asna1	ENSDARG00000018190	325704	810.273	854.02	600.506	640.29	564.22	698.06	0.704933	0.251419
LL0000001491	asns	ENSDARG00000016375	394138	419.241	349.945	399.052	335.714	413.956	339.361	0.902059	0.101285
LL0000001492	asnsd1	ENSDARG00000000540	368827	200.38	364.485	266.999	220.89	281.141	266.848	0.911481	0.113592
LL0000001493	aspa	ENSDARG00000005154	557232	327.805	408.107	254.468	180.994	165.776	317.124	0.445081	0.576988
LL0000001494	aspdh	ENSDARG00000038297	447919	2.91815	0	3.85558	0	2.90835	11.6021	1	-1.09909
LL0000001495	aspg	ENSDARG00000052942	100124594	250.961	196.783	272.782	234.514	193.89	273.616	0.972823	0.0375428
LL0000001496	asph	ENSDARG00000055945	323659	212.052	358.669	839.552	822.257	725.149	492.122	0.604744	-0.532223
LL0000001497	asphd1	ENSDARG00000075813	557921	27.2361	41.6832	59.7614	120.663	54.2892	128.59	0.182336	-1.23796
LL0000001498	asphd2	ENSDARG00000059629	569819	370.605	344.129	189.887	247.164	213.279	427.344	0.984229	0.0270518
LL0000001499	aspm	ENSDARG00000103754	554173	1609.85	1587.84	1861.28	1370.1	2829.83	1391.29	0.879896	-0.144318
LL0000001500	aspn	ENSDARG00000002192	65228	44.745	58.1626	147.476	1858.59	3605.39	952.339	3.06582e-10	-4.6794
LL0000001501	aspscr1	ENSDARG00000105321	550237	345.314	314.078	390.377	188.779	262.721	204.97	0.202733	0.677274
LL0000001502	asrgl1	ENSDARG00000021681	541402	73.9265	69.7951	26.0251	54.4928	42.6558	49.3089	0.896999	0.2128
LL0000001503	ASS1	ENSDARG00000103044		165.362	100.815	332.543	209.213	375.177	304.555	0.570512	-0.57017
LL0000001504	ASTE1	ENSDARG00000062530	100003699	86.5718	59.132	47.2308	95.3624	54.2892	94.7505	0.784855	-0.341227
LL0000001505	aste1a	ENSDARG00000070132	100006826	24.3179	4.84688	46.2669	48.6543	42.6558	13.5358	0.83784	-0.474832
LL0000001506	astn1	ENSDARG00000068323	791157	107.972	155.1	181.212	804.741	338.338	807.313	0.000157404	-2.13416
LL0000001507	asxl1	ENSDARG00000036956	403066	712.029	1167.13	1255.95	1023.69	757.141	971.676	0.819737	0.187786
LL0000001508	asxl2	ENSDARG00000076501	100150267	477.604	524.433	540.745	642.236	610.754	551.1	0.715049	-0.225723
LL0000001509	asz1	ENSDARG00000004823	572911	0	0.969376	10.6028	18.4886	5.81671	10.6353	0.644961	-1.59342
LL0000001510	atad1a	ENSDARG00000023267	368672	326.833	289.843	251.576	284.141	217.157	276.517	0.849418	0.158671
LL0000001511	atad1b	ENSDARG00000056609	368412	183.843	288.874	323.868	341.553	326.705	371.267	0.597787	-0.383985
LL0000001512	atad2	ENSDARG00000076590		390.059	599.075	736.415	393.126	708.669	420.576	0.856986	0.180751
LL0000001513	atad2b	ENSDARG00000060537	100331225	805.409	1255.34	1837.18	1349.67	1396.01	1067.39	0.978607	0.0317713
LL0000001514	atad3	ENSDARG00000086848	403004	0	31.02	80.9671	96.3354	47.5031	50.2758	0.761504	-0.793423
LL0000001515	atad5a	ENSDARG00000070568	560591	297.651	628.156	780.754	612.071	965.573	562.702	0.739735	-0.326729
LL0000001516	atad5b	ENSDARG00000101126	321619	11.6726	94.9989	139.765	83.6853	108.578	65.7452	0.978392	-0.0661126
LL0000001517	atat1	ENSDARG00000004472	406389	108.944	201.63	361.46	364.907	250.118	337.428	0.611	-0.503048
LL0000001518	atcaya	ENSDARG00000071678	565827	42.7995	91.1214	134.945	382.422	222.974	485.354	0.00350158	-2.02025
LL0000001519	atcayb	ENSDARG00000059781	100329872	161.471	146.376	142.656	380.476	185.165	678.723	0.0355866	-1.46582
LL0000001520	ATE1	ENSDARG00000103813	101886126	238.316	178.365	173.501	108.986	130.876	135.358	0.305291	0.653373
LL0000001521	atf1	ENSDARG00000044301	325609	761.637	884.071	1280.05	661.698	860.872	953.306	0.756219	0.240879
LL0000001522	atf2	ENSDARG00000023903	100006516	233.452	251.068	91.5699	203.375	95.0062	243.644	0.956622	0.0878912
LL0000001523	atf3	ENSDARG00000007823	393939	23466.8	28961.1	12127.7	7225.16	10441	620.712	0.0801953	1.81974
LL0000001524	atf4a	ENSDARG00000111939	406514	5906.34	6507.42	10727.2	4230.97	5977.63	1665.87	0.191286	0.962587
LL0000001525	atf4b	ENSDARG00000038141	556410	25343.2	21522.1	21209.5	11208	14810.3	5310.86	0.044929	1.11962
LL0000001526	atf5a	ENSDARG00000068096	566223	304.46	271.425	264.107	1412.92	396.505	815.047	0.00882041	-1.64358
LL0000001527	atf5b	ENSDARG00000077785	567253	795.682	683.41	488.694	343.499	392.628	550.133	0.306246	0.61336
LL0000001528	atf6	ENSDARG00000012656	558071	544.721	791.98	1186.55	654.886	669.891	349.03	0.436137	0.592179
LL0000001530	atf7a	ENSDARG00000011298	566279	240.261	189.998	60.7253	39.8965	66.8921	42.541	0.0463104	1.71711
LL0000001531	atf7b	ENSDARG00000055481	567018	351.151	273.364	245.793	336.687	180.318	263.948	0.876159	0.156285
LL0000001532	atf7ip	ENSDARG00000069619	558977	1019.41	1069.22	2230.45	1513.15	1519.13	1202.75	0.980822	0.0283669
LL0000001533	atf7ip2	ENSDARG00000089698	100005485	284.033	158.978	231.335	181.967	175.471	349.997	0.959028	-0.0691449
LL0000001534	atg10	ENSDARG00000104846	641330	261.661	204.538	133.017	135.259	152.204	171.131	0.660701	0.385792
LL0000001535	atg101	ENSDARG00000043287	567680	598.221	420.709	383.63	263.706	309.255	480.52	0.592194	0.412859
LL0000001536	atg12	ENSDARG00000069545	570965	307.378	321.833	83.8588	55.4659	108.578	103.452	0.102011	1.41445
LL0000001537	atg13	ENSDARG00000036040	393405	457.177	737.695	703.643	644.182	561.312	840.185	0.907259	-0.107702
LL0000001538	ATG14	ENSDARG00000002670	407686	60.3084	42.6526	101.209	113.851	111.487	53.1763	0.727494	-0.447855
LL0000001539	atg16l1	ENSDARG00000099430	550552	2249.89	1632.43	679.545	420.373	670.86	769.606	0.0518742	1.29366
LL0000001540	atg16l2	ENSDARG00000109384	100034627	41.8268	54.2851	11.5667	22.381	21.3279	24.171	0.702862	0.665548
LL0000001541	ATG2A	ENSDARG00000101507	101883461	187.734	98.8764	98.3172	0	78.5255	40.6073	0.355596	1.69195
LL0000001542	atg2b	ENSDARG00000097650	100000277	29.1815	19.3875	79.0393	47.6812	35.8697	15.4695	0.855969	0.366147
LL0000001543	atg3	ENSDARG00000009350	336632	330.724	405.199	380.738	233.54	287.927	393.505	0.708907	0.287373
LL0000001544	atg4a	ENSDARG00000014531	554140	503.867	492.443	256.396	246.191	224.913	211.738	0.136981	0.875406
LL0000001545	atg4b	ENSDARG00000052104	448859	297.651	273.364	288.204	228.675	239.454	254.279	0.717011	0.250201
LL0000001546	atg4c	ENSDARG00000044373	415193	359.905	172.549	179.284	217.971	226.852	214.639	0.925699	0.110015
LL0000001547	atg4da	ENSDARG00000043548	795933	413.405	783.256	500.261	277.329	208.432	246.545	0.0177828	1.21241
LL0000001548	atg4db	ENSDARG00000088145	100329304	0	9.69376	16.3862	15.5694	2.90835	0.966842	0.93118	0.424005
LL0000001549	atg5	ENSDARG00000023396	494180	777.201	713.461	447.247	238.406	394.567	406.073	0.11728	0.899207
LL0000001550	atg7	ENSDARG00000102893	100333016	82.6809	155.1	117.595	72.0083	109.548	87.9826	0.695231	0.398857
LL0000001551	atg9a	ENSDARG00000044551	100009663	302.515	362.547	290.132	279.275	243.332	393.505	0.954251	0.0602473
LL0000001552	atg9b	ENSDARG00000055292	791223	925.053	1025.6	690.148	673.375	730.966	685.491	0.567035	0.337578
LL0000001553	atic	ENSDARG00000016706	140622	273.333	206.477	357.605	304.576	698.974	582.039	0.159796	-0.920994
LL0000001554	atl1	ENSDARG00000060481	571909	1266.48	872.439	509.9	240.352	149.295	292.953	0.000571085	1.95621
LL0000001555	atl2	ENSDARG00000057719	323665	320.024	456.576	498.333	328.903	569.068	470.852	0.919254	-0.102505
LL0000001556	atl3	ENSDARG00000004270	449995	1683.77	1889.31	1548.98	740.518	1275.8	816.981	0.0705916	0.85424
LL0000001557	atm	ENSDARG00000002385	403064	265.552	300.507	293.988	204.348	312.163	242.677	0.831828	0.179951
LL0000001558	atmin	ENSDARG00000068601	571606	1.94543	47.4994	82.8949	147.909	70.7699	79.281	0.506039	-1.17072
LL0000001559	atn1	ENSDARG00000092067	321707	142.989	203.569	272.782	622.775	569.068	647.784	0.000626725	-1.57054
LL0000001560	atoh1a	ENSDARG00000055294	30303	0	8.72439	21.2057	58.3851	64.9532	103.452	0.049612	-2.92113
LL0000001561	atoh1b	ENSDARG00000099564	493915	55.4448	42.6526	23.1335	169.317	127.968	127.623	0.00960565	-1.80957
LL0000001562	atoh1c	ENSDARG00000039602	100498672	0	0	14.4584	47.6812	31.0224	57.0437	0.1463	-3.23
LL0000001563	atoh7	ENSDARG00000069552	58216	12.6453	31.02	104.101	126.501	85.3117	54.1431	0.587936	-0.847662
LL0000001564	atoh8	ENSDARG00000037555	561606	512.622	717.338	507.972	424.265	583.609	551.1	0.8468	0.156763
LL0000001565	atox1	ENSDARG00000087693	558347	591.412	453.668	350.857	157.64	267.568	407.04	0.315127	0.7461
LL0000001566	atp10a	ENSDARG00000061039	567172	1361.8	1407.53	909.916	414.534	669.891	454.416	0.006826	1.25756
LL0000001567	atp10b	ENSDARG00000076230	563932	17.5089	49.4382	33.7363	104.12	83.3728	147.927	0.036226	-1.73607
LL0000001568	atp10d	ENSDARG00000078887	571658	322.942	323.772	356.641	349.338	312.163	366.433	0.969597	-0.034908
LL0000001569	atp11a	ENSDARG00000008413	562925	1333.59	1289.27	1028.48	1513.15	865.72	611.044	0.747143	0.288332
LL0000001570	ATP11B	ENSDARG00000101094	100329583	885.172	678.563	971.605	720.083	740.66	597.508	0.630225	0.300771
LL0000001571	atp11c	ENSDARG00000036442	368385	2279.07	2996.34	2064.66	528.385	603.968	699.993	2.70578e-08	2.00209
LL0000001572	atp13a1	ENSDARG00000029931	334466	425.077	509.892	509.9	361.015	450.795	332.593	0.590668	0.336356
LL0000001573	atp13a2	ENSDARG00000061890	568666	231.507	220.048	145.548	108.012	160.929	113.12	0.373495	0.64413
LL0000001574	atp13a3	ENSDARG00000076622	572029	1260.64	1176.82	1019.8	791.118	587.487	466.018	0.0478757	0.906316
LL0000001575	atp1a1a.1	ENSDARG00000002791	64612	6022.09	7961.49	7619.58	4091.82	5546.23	4406.86	0.14904	0.621195
LL0000001576	atp1a1a.2	ENSDARG00000007739	64613	22.3725	109.54	142.656	194.617	1526.89	2129.95	0.000215181	-3.8101
LL0000001577	atp1a1a.3	ENSDARG00000039131	64614	66.1447	34.8975	30.8446	59.3582	147.357	335.494	0.033629	-2.03968
LL0000001578	atp1a1a.4	ENSDARG00000001870	64615	218.861	383.873	497.369	273.437	972.359	941.704	0.240338	-0.991631
LL0000001579	atp1a1a.5	ENSDARG00000040252	245703	8.75445	9.69376	14.4584	19.4617	27.1446	28.0384	0.437629	-1.18151
LL0000001580	atp1a1b	ENSDARG00000019856	64616	291.815	674.686	1191.37	5660.44	4714.44	9769.93	4.20892e-07	-3.2227
LL0000001581	atp1a2a	ENSDARG00000010472	64609	0	2.90813	10.6028	32.1118	45.5642	34.8063	0.0746327	-3.05642
LL0000001582	atp1a3a	ENSDARG00000018259	64610	531.103	584.534	1662.72	3580.95	1247.68	2224.7	0.0828712	-1.34406
LL0000001583	atp1a3b	ENSDARG00000104139	64611	120.617	309.231	526.286	1335.07	856.025	539.498	0.0518404	-1.51388
LL0000001584	atp1b1a	ENSDARG00000013144	64267	6232.2	9449.48	11386.5	3003.91	5111.91	4049.13	0.0156891	1.15387
LL0000001585	atp1b1b	ENSDARG00000076833	64273	485.386	1006.21	1194.26	1539.42	6405.16	9306.82	0.000375498	-2.68325
LL0000001586	atp1b2a	ENSDARG00000099203	64269	681.874	1458.91	4111.97	8004.6	4082.36	5497.46	0.0715181	-1.49172
LL0000001587	atp1b2b	ENSDARG00000034424	114457	20.427	148.315	131.09	1612.4	834.697	237.843	0.00141661	-3.16261
LL0000001588	atp1b3a	ENSDARG00000015790	30468	115.753	330.557	1019.8	1495.63	854.086	808.28	0.300385	-1.10698
LL0000001589	atp1b3b	ENSDARG00000042837	64272	106.026	171.58	443.391	813.499	509.931	1076.09	0.0211204	-1.73463
LL0000001590	atp1b4	ENSDARG00000053262	100037383	307.378	209.385	473.272	2596.19	1417.34	2410.34	7.81126e-08	-2.69786
LL0000001591	atp23	ENSDARG00000063686	100004177	144.935	200.661	179.284	119.689	203.585	202.07	0.999907	-0.00129237
LL0000001592	atp2a1	ENSDARG00000020574	260440	605.03	528.31	450.139	1143.38	1646.13	2241.14	0.000155213	-1.66766
LL0000001593	atp2a1l	ENSDARG00000035458	494489	4.86358	83.3664	108.92	107.039	158.02	315.19	0.258193	-1.5573
LL0000001594	atp2a2a	ENSDARG00000029439	393940	164.389	187.09	282.421	151.801	220.065	204.004	0.896449	0.13854
LL0000001595	atp2a2b	ENSDARG00000005122	568265	592.384	731.879	1072.81	925.404	1170.13	1161.18	0.483803	-0.442122
LL0000001596	atp2a3	ENSDARG00000060978	568671	1088.47	735.757	856.902	400.911	549.679	856.622	0.399736	0.569055
LL0000001597	atp2b1a	ENSDARG00000012684	378746	1138.08	1487.02	1528.74	1278.63	1209.87	1410.62	0.90301	0.0912978
LL0000001598	atp2b1b	ENSDARG00000007788	561190	54.4721	242.344	285.313	1548.18	1096.45	222.374	0.0177043	-2.30009
LL0000001599	atp2b2	ENSDARG00000063433	557430	6472.46	7286.8	4312.46	3807.68	3904.95	7097.58	0.728702	0.287139
LL0000001600	atp2b3a	ENSDARG00000043474	436745	356.014	544.789	1590.43	1708.74	856.995	2248.87	0.317499	-0.950542
LL0000001601	atp2b3b	ENSDARG00000023445	558525	175.089	302.445	448.211	1269.88	832.758	2577.6	0.000282962	-2.33786
LL0000001602	atp2c1	ENSDARG00000060197	559574	571.957	586.473	484.839	517.681	592.334	586.873	0.956948	-0.0463394
LL0000001603	atp5f1b	ENSDARG00000070083	554135	11205.7	11836.1	12816.9	7536.55	10029	11172.8	0.55814	0.319346
LL0000001604	atp5f1c	ENSDARG00000045514	336957	3847.09	4722.8	4240.17	2108.68	3954.39	5061.42	0.819993	0.203538
LL0000001605	atp5f1d	ENSDARG00000019404	335709	2842.28	3323.02	2923.49	993.52	2171.57	2822.21	0.398023	0.602178
LL0000001606	atp5f1e	ENSDARG00000095897	798291	3643.8	2875.17	1488.25	718.137	1877.83	2161.86	0.367695	0.750993
LL0000001607	atp5fa1	ENSDARG00000010149	553755	10697	11378.5	14866.1	6751.27	10172.4	9580.43	0.362531	0.479031
LL0000001608	atp5if1a	ENSDARG00000067975	100037369	1270.37	1235.95	1012.09	245.217	684.432	767.672	0.110854	1.05164
LL0000001609	atp5if1b	ENSDARG00000044092	558368	909.49	684.38	562.914	292.899	536.106	933.002	0.784807	0.291637
LL0000001610	atp5l	ENSDARG00000011841	326977	6594.05	5897.69	2844.45	1136.56	2806.56	3888.64	0.207938	0.969527
LL0000001611	atp5mc1	ENSDARG00000056008	406301	4082.49	4897.29	5099	1927.68	4779.39	6912.92	0.971767	0.0477959
LL0000001612	atp5mc3a	ENSDARG00000017775	394151	1970.72	2448.64	3189.53	1411.95	2299.54	2811.58	0.795512	0.222138
LL0000001613	atp5mc3b	ENSDARG00000009447	81541	13047	11255.4	9733.4	3497.27	7616.01	8061.52	0.149062	0.827844
LL0000001614	atp5md	ENSDARG00000096003	794625	1882.21	1624.67	700.751	335.714	776.53	1055.79	0.235931	0.956603
LL0000001615	atp5mea	ENSDARG00000078113	559659	1502.85	1332.89	602.434	337.661	761.988	766.705	0.237125	0.8814
LL0000001616	atp5meb	ENSDARG00000068940	767750	2724.58	2823.79	1484.4	680.187	1575.36	2275.95	0.459699	0.634099
LL0000001617	atp5mf	ENSDARG00000037867	402883	1504.79	1255.34	799.068	350.311	702.852	989.079	0.270551	0.80138
LL0000001618	atp5pb	ENSDARG00000011553	449787	5345.08	6232.12	4965.98	2286.75	4100.78	4933.79	0.375499	0.547192
LL0000001619	atp5pd	ENSDARG00000098355	393675	4413.22	4793.57	3900.88	1569.59	3382.41	4604.1	0.569895	0.455913
LL0000001620	atp5pf	ENSDARG00000014313	406599	3920.05	3767.97	2459.86	949.731	2084.32	2742.93	0.233942	0.812783
LL0000001621	atp5po	ENSDARG00000001788	335191	6748.71	6176.87	5663.84	2289.67	5397.9	6411.13	0.628931	0.398918
LL0000001622	ATP6	ENSDARG00000063911	140519	43003.8	48102.4	77719.7	66005.3	105777	114863	0.171881	-0.763726
LL0000001623	atp6ap1a	ENSDARG00000041417	100004566	193.571	251.068	785.574	1518.01	700.913	1046.12	0.0790452	-1.40816
LL0000001624	atp6ap1b	ENSDARG00000037153	195824	408.541	676.625	679.545	339.607	439.161	490.189	0.471281	0.475792
LL0000001625	atp6ap1la	ENSDARG00000091509	100000415	63.2266	146.376	300.735	744.41	283.08	415.742	0.0817836	-1.4997
LL0000001626	atp6ap1lb	ENSDARG00000090963	561786	60.3084	46.5301	251.576	882.588	283.08	213.672	0.0618653	-1.94418
LL0000001627	atp6ap2	ENSDARG00000008735	406296	694.52	1495.75	2754.81	2680.85	2051.36	2515.72	0.541118	-0.551564
LL0000001628	atp6v0a1a	ENSDARG00000020847	324307	363.796	363.516	528.214	1066.5	692.188	401.239	0.260487	-0.782661
LL0000001629	atp6v0a1b	ENSDARG00000015174	553691	191.625	360.608	1249.21	2388.92	981.084	2733.26	0.0514231	-1.76041
LL0000001630	atp6v0a2a	ENSDARG00000035538	561469	37.9359	74.642	139.765	431.077	193.89	329.693	0.0111162	-1.91946
LL0000001631	atp6v0a2b	ENSDARG00000035565	561117	153.689	285.966	384.594	262.733	347.063	314.224	0.880473	-0.164804
LL0000001632	atp6v0b	ENSDARG00000031681	321724	1208.11	1889.31	2417.45	3165.45	1889.46	2653.98	0.478894	-0.483185
LL0000001633	atp6v0ca	ENSDARG00000057853	192336	4140.85	4666.58	5919.27	3124.58	4074.6	4413.63	0.554868	0.342719
LL0000001634	atp6v0cb	ENSDARG00000036577	325402	1119.6	1738.09	3330.25	5804.45	3317.46	5114.59	0.0560566	-1.20205
LL0000001635	atp6v0d1	ENSDARG00000069090	322811	409.514	632.033	757.621	815.445	641.776	1291.7	0.380842	-0.611525
LL0000001636	atp6v0e1	ENSDARG00000101794	450017	0	0	374.955	0	116.334	153.728	0.964973	0.473454
LL0000001637	atp6v1aa	ENSDARG00000034534	394110	352.123	626.217	1011.12	738.572	689.28	1430.93	0.573901	-0.523003
LL0000001638	atp6v1ab	ENSDARG00000076318	337583	100.19	144.437	279.529	203.375	205.524	457.316	0.456613	-0.724686
LL0000001639	atp6v1b2	ENSDARG00000043465	359840	76.8446	81.4276	230.371	505.031	321.858	908.831	0.00387123	-2.15893
LL0000001640	atp6v1ba	ENSDARG00000013443	359839	499.976	653.36	1823.69	1179.38	828.88	1015.18	0.988549	-0.0223026
LL0000001641	atp6v1c1a	ENSDARG00000023967	368907	153.689	323.772	543.636	495.3	340.277	545.299	0.674119	-0.435424
LL0000001642	atp6v1c1b	ENSDARG00000035880	449655	194.543	193.875	276.638	159.586	229.76	394.471	0.82875	-0.237048
LL0000001643	atp6v1c2	ENSDARG00000070440	100538220	19.4543	0	4.81947	7.78468	7.75561	0	0.903981	0.643387
LL0000001644	atp6v1d	ENSDARG00000011175	393935	340.451	528.31	548.456	423.292	437.222	655.519	0.923818	-0.0972349
LL0000001645	atp6v1e1a	ENSDARG00000014085	108179059	336.56	253.977	291.096	260.787	293.744	277.484	0.92607	0.0835545
LL0000001646	atp6v1e1b	ENSDARG00000030694	192335	924.081	1601.41	1486.32	926.377	1139.1	2395.83	0.892887	-0.153215
LL0000001647	atp6v1f	ENSDARG00000045543	436799	329.751	726.063	588.939	414.534	462.428	991.979	0.876916	-0.184353
LL0000001648	atp6v1g1	ENSDARG00000022315	335025	415.35	862.745	1533.56	1285.45	986.901	1782.86	0.579158	-0.528342
LL0000001649	atp6v1h	ENSDARG00000006370	286779	751.91	865.653	1321.5	984.762	773.622	1405.79	0.917396	-0.106464
LL0000001650	atp7a	ENSDARG00000003699	564924	580.712	476.933	431.825	337.661	281.141	271.682	0.117317	0.742136
LL0000001651	atp7b	ENSDARG00000058145	556499	10.6999	35.8669	14.4584	36.0042	37.8086	30.9389	0.627807	-0.779481
LL0000001652	ATP8	ENSDARG00000063910	140520	444.531	680.502	1482.47	1268.9	2558.38	2304.95	0.0807022	-1.23373
LL0000001654	atp8a1	ENSDARG00000063001	767630	804.437	704.737	985.1	1482.01	1019.86	1493.77	0.161001	-0.679798
LL0000001655	atp8a2	ENSDARG00000077492	100330943	280.142	355.761	428.933	656.833	507.023	548.199	0.180417	-0.68506
LL0000001656	atp8b1	ENSDARG00000060980	100148342	136.18	104.693	239.046	129.42	174.501	332.593	0.724085	-0.407389
LL0000001657	atp8b2	ENSDARG00000099216		41.8268	35.8669	40.4836	12.6501	22.2974	72.5131	0.953841	0.137007
LL0000001658	atp8b3	ENSDARG00000042285	566530	230.534	126.988	113.74	154.721	93.0673	166.297	0.879512	0.186548
LL0000001659	atp8b4	ENSDARG00000079453	559291	83.6536	2.90813	10.6028	41.8427	14.5418	15.4695	0.882277	0.435305
LL0000001660	atp8b5a	ENSDARG00000062040	100330945	235.397	345.098	295.915	105.093	141.54	50.2758	0.0162594	1.56164
LL0000001661	ATP9A	ENSDARG00000115869	101886226	67.1174	159.947	96.3894	167.371	93.0673	115.054	0.869159	-0.215179
LL0000001662	atp9b	ENSDARG00000062521	568160	403.677	368.363	194.707	237.433	203.585	191.435	0.390827	0.612159
LL0000001663	atpaf1	ENSDARG00000042799	550606	316.133	422.648	481.947	300.683	363.544	517.26	0.965794	0.0471381
LL0000001664	atpaf2	ENSDARG00000056270	560253	128.399	86.2745	223.623	209.213	253.027	256.213	0.37194	-0.712926
LL0000001665	atpv0e2	ENSDARG00000059057	553767	135.208	238.467	544.6	1172.57	730.966	956.206	0.0183627	-1.63883
LL0000001666	atr	ENSDARG00000079625	567770	332.669	250.099	251.576	240.352	187.104	242.677	0.669779	0.316175
LL0000001667	atraid	ENSDARG00000043388	553468	33.0724	176.426	190.851	184.886	113.426	249.445	0.758453	-0.452225
LL0000001668	atrip	ENSDARG00000063076	558534	40.8541	130.866	166.754	120.663	174.501	107.319	0.865605	-0.249803
LL0000001669	atrn	ENSDARG00000062164	794975	750.937	809.429	693.04	822.257	710.607	747.369	0.98382	-0.0170744
LL0000001670	atrnl1a	ENSDARG00000077188	792417	53.4994	96.9376	62.6531	178.075	147.357	133.424	0.0995525	-1.10655
LL0000001671	atrnl1b	ENSDARG00000006420	569196	703.274	827.847	950.4	1127.81	1028.59	1202.75	0.377732	-0.436857
LL0000001672	atrx	ENSDARG00000042236	323299	6595.02	8085.57	7190.65	4778.82	6230.66	5635.72	0.402596	0.393928
LL0000001673	atrxl	ENSDARG00000099449		872.527	916.061	1267.52	1093.75	880.261	752.203	0.833806	0.164817
LL0000001674	atxn10	ENSDARG00000008439	100034473	90.4626	129.896	182.176	156.667	229.76	225.274	0.448312	-0.603654
LL0000001675	atxn1a	ENSDARG00000061687	557340	1456.16	1352.28	1478.61	1030.5	1099.36	946.538	0.254463	0.478749
LL0000001676	atxn1b	ENSDARG00000060862	565841	249.015	212.293	389.413	701.594	500.237	821.815	0.0169725	-1.25016
LL0000001677	atxn1l	ENSDARG00000086977	793927	184.816	225.865	127.234	182.94	201.646	116.021	0.932537	0.103692
LL0000001678	atxn2	ENSDARG00000052897	569210	455.231	403.261	326.76	278.302	365.483	304.555	0.637407	0.32169
LL0000001679	atxn2l	ENSDARG00000011597	324525	687.711	1084.73	1088.24	689.917	929.703	832.451	0.769534	0.222363
LL0000001680	atxn3	ENSDARG00000099274	394079	431.886	234.589	184.104	138.178	203.585	134.391	0.261516	0.836978
LL0000001681	atxn7	ENSDARG00000074804	100001490	650.747	455.607	600.506	531.305	578.762	509.526	0.929628	0.0757138
LL0000001682	atxn7l1	ENSDARG00000089860	100536590	105.053	71.7338	83.8588	77.8468	60.106	41.5742	0.602934	0.537942
LL0000001683	atxn7l2a	ENSDARG00000055300	692316	460.095	366.424	373.991	249.11	342.216	144.059	0.305388	0.707085
LL0000001684	atxn7l2b	ENSDARG00000056268	436928	491.222	423.617	316.157	315.28	292.774	283.285	0.440985	0.465762
LL0000001685	atxn7l3	ENSDARG00000029331	368510	192.598	215.202	277.602	204.348	168.684	204.004	0.76472	0.248325
LL0000001686	auh	ENSDARG00000042975	445182	179.953	312.139	293.988	257.868	297.621	352.897	0.818796	-0.208615
LL0000001687	aup1	ENSDARG00000092609	324654	298.624	461.423	907.988	574.12	665.043	527.895	0.949039	-0.0831697
LL0000001688	aurka	ENSDARG00000012485	445246	820.973	558.361	507.972	330.849	488.603	312.29	0.197838	0.737768
LL0000001689	aurkaip1	ENSDARG00000074985	100126015	415.35	494.382	440.5	228.675	412.986	601.375	0.91668	0.119315
LL0000001690	aurkb	ENSDARG00000037640	791894	641.02	520.555	779.79	451.512	507.992	454.416	0.4069	0.457383
LL0000001691	auts2a	ENSDARG00000056427	368890	734.401	989.733	1564.4	1955.9	2520.57	2470.28	0.0317469	-1.07888
LL0000001692	auts2b	ENSDARG00000020946	100150849	14.5907	98.8764	162.898	740.518	590.396	677.756	0.000912277	-2.86147
LL0000001694	aven	ENSDARG00000002894	692323	299.597	348.975	279.529	241.325	257.874	370.3	0.923242	0.0940677
LL0000001695	avil	ENSDARG00000059342	678618	106.999	40.7138	37.5919	63.2505	35.8697	28.0384	0.720504	0.543253
LL0000001696	avl9	ENSDARG00000055538	751682	443.559	436.219	373.991	437.888	290.835	279.417	0.664986	0.314589
LL0000001697	avp	ENSDARG00000058567	352922	0	0.969376	0	4.86543	4.84725	87.9826	0.0137098	-6.55214
LL0000001698	avpr1aa	ENSDARG00000077083	571591	14.5907	31.02	11.5667	18.4886	10.664	5.80105	0.751145	0.710147
LL0000001699	avpr1ab	ENSDARG00000045788	555939	1302.47	1143.86	827.021	109.959	154.143	79.281	1.52538e-12	3.2529
LL0000001700	avpr2aa	ENSDARG00000007436	100007585	3.89087	24.2344	26.989	102.174	83.3728	103.452	0.0182839	-2.39024
LL0000001701	avpr2ab	ENSDARG00000029219	100151502	69.0629	103.723	68.4365	149.855	189.043	85.0821	0.337124	-0.813618
LL0000001702	avpr2l	ENSDARG00000076690	100004053	30.1542	7.75501	8.67505	6.8116	7.75561	1.93368	0.518839	1.49733
LL0000001703	axdnd1	ENSDARG00000062355	557839	12.6453	14.5406	8.67505	27.2464	43.6253	47.3752	0.131427	-1.72151
LL0000001704	axin1	ENSDARG00000102964	57931	1050.53	1437.58	1415.96	1279.61	1571.48	1727.75	0.728524	-0.229995
LL0000001705	axin2	ENSDARG00000100149	58080	1033.03	1025.6	755.693	1225.11	1549.18	1896.94	0.123	-0.731034
LL0000001706	AXL	ENSDARG00000112045	100330721	33.0724	9.69376	22.1696	41.8427	45.5642	21.2705	0.653448	-0.742994
LL0000001707	azi2	ENSDARG00000102419	406377	31.1269	27.1425	26.989	72.9814	45.5642	29.9721	0.51846	-0.800663
LL0000001708	azin1a	ENSDARG00000052789	550230	4543.56	5291.82	1953.81	356.149	592.334	532.73	1.21448e-08	2.9926
LL0000001709	azin1b	ENSDARG00000035869	317764	2649.68	2932.36	2682.52	2068.78	2353.83	2797.07	0.748856	0.195
LL0000001710	b2m	ENSDARG00000053136	30400	352.123	109.54	367.244	100.228	177.41	91.8499	0.17033	1.16569
LL0000001711	b2ml	ENSDARG00000015887	791742	8138.72	6109.01	4725.01	1948.12	4216.14	3448.72	0.0758315	0.980869
LL0000001712	b3galnt2	ENSDARG00000046133	553716	139.098	101.785	207.237	116.77	163.837	105.386	0.85023	0.215361
LL0000001713	b3galt1a	ENSDARG00000079700	559521	35.9905	45.5607	74.2198	170.29	144.448	223.34	0.00552159	-1.78823
LL0000001714	b3galt1b		571003	30.1542	43.6219	27.9529	124.555	54.2892	121.822	0.0611966	-1.56345
LL0000001715	b3galt2	ENSDARG00000102061	404633	364.769	499.229	525.322	1042.17	748.416	513.393	0.222547	-0.729724
LL0000001716	b3galt4	ENSDARG00000076218	101886595	58.363	53.3157	75.1837	219.917	108.578	116.988	0.0835573	-1.2533
LL0000001717	b3galt6	ENSDARG00000038414	572324	35.0178	81.4276	85.7866	110.932	101.792	136.325	0.394715	-0.787324
LL0000001718	B3GAT1	ENSDARG00000113928	100332644	0	0	16.3862	31.1387	7.75561	19.3368	0.602275	-1.82872
LL0000001719	b3gat1a	ENSDARG00000040547	548607	303.488	285.966	657.376	1177.43	684.432	1331.34	0.0279067	-1.35671
LL0000001720	b3gat1b	ENSDARG00000055279	100332851	60.3084	96.9376	70.3643	369.772	116.334	289.086	0.0132165	-1.76797
LL0000001721	b3gat2	ENSDARG00000030733	445060	178.007	360.608	293.024	471.946	408.139	744.468	0.121701	-0.966003
LL0000001722	b3gat3	ENSDARG00000001939	192334	155.635	215.202	277.602	245.217	340.277	365.466	0.4318	-0.552386
LL0000001723	b3glcta	ENSDARG00000073917	799443	226.643	158.008	133.981	138.178	184.196	205.937	0.983065	-0.0267487
LL0000001724	b3glctb	ENSDARG00000077740	564156	13.618	11.6325	14.4584	29.1926	14.5418	24.171	0.661849	-0.773996
LL0000001725	B3GNT10	ENSDARG00000094253	101883349	0	1.93875	4.81947	10.7039	0.969451	5.80105	1	-1.36975
LL0000001726	b3gnt2a	ENSDARG00000052376	405766	7.78173	13.5713	17.3501	56.4389	54.2892	29.9721	0.0897359	-1.86179
LL0000001727	b3gnt2b	ENSDARG00000091902	793362	612.811	580.656	585.084	256.895	236.546	215.606	0.000319786	1.32677
LL0000001728	b3gnt2l	ENSDARG00000068219	797513	143.962	286.935	596.65	150.828	253.027	490.189	0.897837	0.200801
LL0000001729	b3gnt3.1	ENSDARG00000043482	494166	0	14.5406	6.74726	22.381	10.664	20.3037	0.636027	-1.32525
LL0000001730	b3gnt3.2	ENSDARG00000054373	100002020	0	0	10.6028	13.6232	4.84725	3.86737	0.83303	-1.07435
LL0000001731	b3gnt3.3	ENSDARG00000093521	561028	59.3357	44.5913	19.2779	47.6812	21.3279	24.171	0.821989	0.402935
LL0000001732	b3gnt3.4	ENSDARG00000058100	561172	1469.77	1204.93	960.039	62.2775	66.8921	42.541	3.91108e-24	4.40388
LL0000001733	b3gnt5a	ENSDARG00000018971	336526	1204.22	1347.43	2055.02	335.714	554.526	239.777	8.50181e-05	2.02739
LL0000001734	b3gnt5b	ENSDARG00000004396	791470	28.2088	31.02	17.3501	35.0311	54.2892	72.5131	0.332496	-1.07967
LL0000001735	b3gnt7	ENSDARG00000038489	286748	1755.75	2736.55	2129.24	272.464	307.316	464.084	2.05166e-10	2.66521
LL0000001736	b3gnt7l	ENSDARG00000053133	407623	27.2361	43.6219	43.3752	144.017	151.234	167.264	0.000590055	-2.0174
LL0000001737	b3gnt9	ENSDARG00000041616	100034499	45.7177	29.0813	52.0503	83.6853	76.5866	58.9773	0.419293	-0.789377
LL0000001738	b3gntl1	ENSDARG00000043431	619261	24.3179	17.4488	23.1335	27.2464	42.6558	19.3368	0.792344	-0.45943
LL0000001739	b4galnt1a	ENSDARG00000061520	558684	67.1174	47.4994	51.0864	63.2505	45.5642	53.1763	0.984074	0.0326707
LL0000001740	b4galnt1b	ENSDARG00000077352	793635	11.6726	42.6526	1.92779	37.9503	26.1752	29.9721	0.754397	-0.742322
LL0000001741	b4galnt2.1	ENSDARG00000094579	558078	0	0	8.67505	22.381	19.389	15.4695	0.344426	-2.72091
LL0000001742	b4galnt2.2	ENSDARG00000070605	557782	0	2.90813	0	11.677	10.664	2.90052	1	-3.11784
LL0000001743	b4galnt3a	ENSDARG00000078749	561505	31.1269	27.1425	5.78336	44.7619	27.1446	80.2478	0.400622	-1.24846
LL0000001744	b4galnt3b	ENSDARG00000058939	553524	105.053	82.397	67.4726	161.532	96.9451	248.478	0.212805	-0.991873
LL0000001745	b4galnt4a	ENSDARG00000046150	565184	90.4626	260.762	556.167	699.648	517.687	699.026	0.236685	-1.07852
LL0000001746	b4galnt4b	ENSDARG00000076701	559305	4.86358	43.6219	65.5448	159.586	81.4339	118.922	0.182093	-1.65815
LL0000001747	b4galt1	ENSDARG00000002634	550425	27.2361	71.7338	83.8588	57.412	92.0978	118.922	0.668689	-0.553993
LL0000001748	b4galt1l	ENSDARG00000104404	768123	330.724	643.666	446.283	140.124	248.179	225.274	0.036294	1.21124
LL0000001749	b4galt2	ENSDARG00000077994	100148828	11.6726	0	15.4223	66.1698	24.2363	15.4695	0.358773	-1.96608
LL0000001750	b4galt3	ENSDARG00000062329	561756	172.171	216.171	262.179	377.557	318.949	292.953	0.302998	-0.604989
LL0000001751	b4galt4	ENSDARG00000104042	492760	417.295	452.699	422.186	312.36	366.452	566.569	0.959873	0.0531968
LL0000001752	b4galt5	ENSDARG00000037815	724080	29.1815	40.7138	31.8085	24.3271	31.9919	11.6021	0.721092	0.582524
LL0000001753	b4galt6	ENSDARG00000010301	393912	2500.85	3055.47	3083.5	1882.92	2547.72	1205.65	0.288661	0.616261
LL0000001754	b4galt7	ENSDARG00000021899	445022	42.7995	189.998	159.043	205.321	233.638	211.738	0.477575	-0.731668
LL0000001755	b4gat1	ENSDARG00000077583	101669768	139.098	210.355	211.093	333.768	262.721	296.82	0.254786	-0.672281
LL0000001756	b9d1	ENSDARG00000011727	554150	54.4721	49.4382	53.9781	97.3085	90.1589	60.911	0.477974	-0.653591
LL0000001757	b9d2	ENSDARG00000017385	436667	82.6809	65.9176	73.256	102.174	102.762	180.799	0.313196	-0.798053
LL0000001758	baalc		101884762	0.972717	1.93875	0.963894	7.78468	7.75561	0.966842	1	-2.09061
LL0000001759	baalca	ENSDARG00000077775	572429	22.3725	35.8669	31.8085	46.7081	24.2363	63.8115	0.691309	-0.581559
LL0000001760	baalcb	ENSDARG00000089549	100536942	1.94543	32.9588	26.0251	75.9006	43.6253	137.292	0.131716	-2.07537
LL0000001761	babam1	ENSDARG00000077526	445296	380.332	515.708	444.355	328.903	317.01	579.138	0.896215	0.129802
LL0000001762	babam2	ENSDARG00000038863	550474	728.565	748.358	596.65	339.607	476.97	554.967	0.270821	0.596293
LL0000001763	bace1	ENSDARG00000101716	403005	258.743	301.476	313.266	289.006	177.41	472.786	0.931867	-0.10466
LL0000001764	bace2	ENSDARG00000044781	449818	14.5907	333.465	459.778	259.814	496.359	317.124	0.835369	-0.409892
LL0000001765	bach1a	ENSDARG00000062553	678555	455.231	403.261	210.129	193.644	222.974	204.004	0.226598	0.783928
LL0000001766	bach1b	ENSDARG00000002196	553688	531.103	418.771	289.168	293.872	358.697	238.81	0.507078	0.475095
LL0000001767	bach2a	ENSDARG00000036569	557210	373.523	280.15	220.732	186.832	149.295	177.899	0.193455	0.766429
LL0000001768	bach2b	ENSDARG00000004074	555350	527.212	702.798	1534.52	1638.68	1009.2	880.793	0.734569	-0.352067
LL0000001769	bada	ENSDARG00000087993	564921	1676.96	982.948	871.36	570.228	479.878	243.644	0.0131898	1.44864
LL0000001770	badb	ENSDARG00000054937	58100	873.499	988.764	602.434	137.205	250.118	226.241	2.20904e-05	2.00608
LL0000001771	bag1	ENSDARG00000020895	558108	327.805	379.026	437.608	251.056	266.599	303.588	0.399732	0.478768
LL0000001772	bag2	ENSDARG00000035005	393975	7110.56	3742.76	2960.12	159.586	988.84	479.553	4.30849e-05	3.08491
LL0000001773	bag3	ENSDARG00000039486	445139	2178.89	1368.76	1090.16	467.081	1000.47	119.888	0.0877115	1.54674
LL0000001774	bag4	ENSDARG00000043179	100001980	61.2811	100.815	180.248	173.209	215.218	178.866	0.40843	-0.728541
LL0000001775	bag5	ENSDARG00000017316	569580	282.088	296.629	307.482	413.561	375.177	422.51	0.389925	-0.450783
LL0000001776	bag6	ENSDARG00000075892	83910	703.274	935.448	961.966	531.305	708.669	753.17	0.52192	0.383848
LL0000001777	bag6l	ENSDARG00000077531	751663	424.104	222.957	215.912	216.998	196.799	204.004	0.542191	0.482142
LL0000001778	bahcc1a	ENSDARG00000103739	797750	2617.58	2154.92	2060.81	1183.27	1203.09	1056.76	0.00509998	0.988868
LL0000001779	bahcc1b	ENSDARG00000080009	794333	3144.79	3034.15	3214.59	2014.29	2261.73	2084.51	0.127243	0.562521
LL0000001780	bahd1	ENSDARG00000086789	564712	964.935	865.653	855.938	626.667	702.852	520.161	0.245873	0.538468
LL0000001781	baiap2a	ENSDARG00000062799	678518	707.165	606.83	581.228	534.224	429.467	494.056	0.488303	0.378623
LL0000001782	baiap2b	ENSDARG00000113723	100537012	499.976	661.115	293.988	77.8468	96.9451	107.319	5.69679e-06	2.36671
LL0000001783	baiap2l1a	ENSDARG00000029305	387261	72.9537	46.5301	62.6531	55.4659	60.106	73.48	0.972823	-0.0538096
LL0000001784	baiap2l1b	ENSDARG00000031119	550528	49.6085	65.9176	26.989	30.1656	35.8697	29.9721	0.678484	0.569815
LL0000001785	baiap2l2a	ENSDARG00000016483	394210	0	3.87751	26.989	40.8696	22.2974	18.37	0.603853	-1.40095
LL0000001786	baiap2l2b	ENSDARG00000060933	564798	72.9537	0	11.5667	33.0849	29.0835	44.4747	0.923117	-0.335545
LL0000001787	baiap3	ENSDARG00000079264	564728	76.8446	24.2344	15.4223	59.3582	33.9308	111.187	0.612675	-0.811783
LL0000001788	bambia	ENSDARG00000055381	83496	1266.48	1112.84	1155.71	411.615	503.145	332.593	6.035e-05	1.50286
LL0000001789	bambib	ENSDARG00000099677	431736	919.217	1032.39	732.56	273.437	536.106	289.086	0.0126195	1.28876
LL0000001790	banf1	ENSDARG00000037009	334717	4715.73	4943.82	4645.01	1536.5	3397.93	3460.33	0.179502	0.768912
LL0000001791	banp	ENSDARG00000017562	553659	141.044	183.212	284.349	246.191	206.493	204.97	0.921192	-0.111752
LL0000001792	bap1	ENSDARG00000063051	558885	108.944	251.068	262.179	299.71	278.232	276.517	0.600329	-0.4576
LL0000001793	bard1	ENSDARG00000076733	100147913	34.0451	69.7951	47.2308	80.7661	78.5255	56.0768	0.661097	-0.511519
LL0000001794	barhl1a	ENSDARG00000035508	550407	36.9632	21.3263	57.8336	263.706	95.0062	216.573	0.00314583	-2.30848
LL0000001795	barhl1b	ENSDARG00000019013	553186	26.2633	48.4688	26.989	330.849	142.509	400.272	4.52666e-06	-3.10243
LL0000001796	barhl2	ENSDARG00000104361	100001699	185.789	136.682	955.219	614.017	182.257	782.175	0.86767	-0.304943
LL0000001797	barx1	ENSDARG00000007407	553644	46.6904	36.8363	63.617	421.346	577.793	437.012	2.60823e-12	-3.28677
LL0000001798	barx2	ENSDARG00000041098	100002200	110.89	140.56	126.27	162.505	257.874	459.25	0.0755668	-1.2196
LL0000001799	basp1	ENSDARG00000053358	569631	183.843	91.1214	73.256	102.174	37.8086	125.689	0.785538	0.39029
LL0000001800	batf	ENSDARG00000011818	564589	0	0	10.6028	8.75777	10.664	13.5358	0.686612	-1.63545
LL0000001801	batf3	ENSDARG00000042577	751677	59.3357	42.6526	26.0251	12.6501	22.2974	35.7731	0.555513	0.855854
LL0000001802	baxa	ENSDARG00000089129	58081	1422.11	1685.75	1310.9	397.019	554.526	464.084	5.75015e-06	1.64219
LL0000001803	baxb	ENSDARG00000030881	503609	511.649	711.522	293.024	131.367	203.585	174.031	0.00616593	1.57473
LL0000001804	baz1a	ENSDARG00000099745	334173	2750.84	2300.33	2967.83	1407.08	2325.71	1249.16	0.200249	0.686713
LL0000001805	baz1b	ENSDARG00000102832	571727	1511.6	2183.04	2664.2	2108.68	2921.92	1574.02	0.959598	-0.0547042
LL0000001806	baz2a	ENSDARG00000102974	450079	1590.39	1902.89	2612.15	1914.06	2233.61	2268.21	0.934342	-0.0715487
LL0000001807	baz2ba	ENSDARG00000057782	561095	3223.58	3515.93	3397.73	2969.86	3440.58	2695.55	0.799456	0.154778
LL0000001808	bbc3	ENSDARG00000069282	751763	1320.95	1431.77	421.222	174.182	205.524	199.169	3.61581e-05	2.45493
LL0000001809	bbip1	ENSDARG00000071046	795943	604.057	675.655	293.024	279.275	323.797	433.145	0.422541	0.601917
LL0000001810	bbox1	ENSDARG00000036135	572649	181.898	248.16	174.465	253.975	284.049	202.07	0.719213	-0.291909
LL0000001811	bbs1	ENSDARG00000075169	568986	137.153	162.855	171.573	310.414	243.332	216.573	0.219233	-0.707898
LL0000001812	bbs10	ENSDARG00000069515	100034535	20.427	5.81626	22.1696	59.3582	24.2363	47.3752	0.293388	-1.43568
LL0000001813	bbs12	ENSDARG00000016112	570583	125.48	92.0907	41.4474	106.066	48.4725	67.6789	0.887516	0.221037
LL0000001814	bbs2	ENSDARG00000041621	259187	158.553	190.967	192.779	265.652	250.118	262.014	0.369295	-0.520257
LL0000001815	bbs4	ENSDARG00000063522	768303	55.4448	36.8363	20.2418	137.205	87.2506	89.9163	0.0803077	-1.48242
LL0000001816	bbs5	ENSDARG00000039827	393269	13.618	56.2238	79.0393	167.371	142.509	131.49	0.096692	-1.56764
LL0000001817	bbs7	ENSDARG00000059911	557491	55.4448	111.478	93.4977	285.114	261.752	216.573	0.00640256	-1.55159
LL0000001818	bbs9	ENSDARG00000079217	100333716	223.725	210.355	177.357	482.65	417.833	227.208	0.152523	-0.883096
LL0000001819	bbx	ENSDARG00000012699	100005540	2189.59	2636.7	1586.57	928.323	1318.45	1017.12	0.0311181	0.974368
LL0000001820	bcam	ENSDARG00000090190	767689	4021.21	6571.4	4274.87	3405.8	3601.51	4913.49	0.640267	0.318679
LL0000001821	bcan	ENSDARG00000099412	334113	21.3998	84.3357	125.306	451.512	481.817	855.655	0.000100049	-2.95278
LL0000001822	bcap29	ENSDARG00000016231	554151	3435.63	5411.06	1403.43	345.445	337.369	387.703	1.5599e-08	3.25926
LL0000001823	bcap31	ENSDARG00000044972	368488	969.798	943.203	1069.92	913.727	735.813	588.807	0.457402	0.41431
LL0000001824	bcar1	ENSDARG00000056525	568309	2632.17	2883.89	2283.47	688.944	1224.42	851.787	0.000263974	1.49602
LL0000001825	bcar3	ENSDARG00000016981	570610	926.026	883.102	728.704	246.191	359.666	285.218	0.000128323	1.50996
LL0000001826	bcas2	ENSDARG00000043631	493614	405.623	592.289	916.663	534.224	771.683	728.999	0.937443	-0.0879194
LL0000001827	bcas3	ENSDARG00000090764	393594	492.195	538.973	265.071	276.356	284.049	330.66	0.438579	0.540696
LL0000001828	bcat1	ENSDARG00000045568	337412	35.9905	35.8669	104.101	313.333	135.723	248.478	0.0126889	-1.98685
LL0000001829	bcat2	ENSDARG00000054849	436949	1175.04	863.714	785.574	437.888	700.913	1057.72	0.669803	0.362664
LL0000001830	bccip	ENSDARG00000004948	541348	2520.31	2456.4	2208.28	791.118	2190.96	2004.26	0.489098	0.526999
LL0000001831	bcdin3d	ENSDARG00000074111	568375	0	7.75501	5.78336	5.83851	5.81671	12.5689	0.830683	-0.839202
LL0000001832	bckdha	ENSDARG00000040555	554124	390.059	378.057	500.261	427.184	550.648	611.044	0.625236	-0.325017
LL0000001833	bckdhb	ENSDARG00000014676	569980	769.419	827.847	775.935	451.512	692.188	888.527	0.782124	0.223758
LL0000001834	bckdhbl	ENSDARG00000093569	555648	94.3535	68.8257	223.623	373.665	375.177	404.14	0.0198638	-1.5756
LL0000001835	bckdk	ENSDARG00000016904	282677	1276.2	1251.46	1784.17	735.652	936.49	953.306	0.117174	0.715741
LL0000001836	bcl10	ENSDARG00000077130	100334750	189.68	82.397	188.923	111.905	106.64	43.5079	0.418554	0.814972
LL0000001837	bcl11aa	ENSDARG00000061352	678650	578.766	405.199	679.545	1518.01	666.013	1352.61	0.0617721	-1.08814
LL0000001838	bcl11ab	ENSDARG00000063153	566491	26.2633	246.222	394.233	1219.28	997.565	1201.78	0.0121034	-2.35822
LL0000001839	bcl11ba	ENSDARG00000062510	100093707	184.816	654.329	1046.79	2405.47	1170.13	3270.83	0.0206618	-1.86005
LL0000001840	bcl2a	ENSDARG00000094704	570772	1702.25	1679.93	1732.12	1158.94	1686.84	1301.37	0.595813	0.302412
LL0000001841	bcl2b	ENSDARG00000089109	100007048	101.163	155.1	137.837	188.779	92.0978	458.283	0.377486	-0.907332
LL0000001842	bcl2l1	ENSDARG00000008434	114401	3052.38	2595.99	2379.85	998.385	2001.92	1442.53	0.0897359	0.853598
LL0000001843	bcl2l10	ENSDARG00000026766	373113	9327.38	9621.06	6158.32	894.265	1316.51	1161.18	2.97397e-14	2.89641
LL0000001844	bcl2l11	ENSDARG00000079144	100190951	1908.47	1368.76	861.721	336.687	500.237	290.052	0.000228939	1.8768
LL0000001845	bcl2l13	ENSDARG00000062370	559355	388.114	458.515	534.961	606.232	649.532	473.752	0.617488	-0.324013
LL0000001846	bcl2l16	ENSDARG00000114237	100359374	24.3179	60.1013	14.4584	102.174	62.0449	77.3473	0.244473	-1.28877
LL0000001847	bcl3	ENSDARG00000087832	565656	628.375	1063.41	644.845	101.201	144.448	43.5079	6.12002e-07	3.01455
LL0000001848	bcl6aa	ENSDARG00000070864	393707	233.452	209.385	468.453	336.687	356.758	258.147	0.961214	-0.0623827
LL0000001849	bcl6ab	ENSDARG00000069295	100001936	224.698	161.886	228.443	180.994	174.501	155.661	0.747201	0.266903
LL0000001850	bcl6b	ENSDARG00000069335	793278	5969.56	6938.8	5739.99	35.0311	15.5112	42.541	5.56155e-48	7.64625
LL0000001851	bcl7a	ENSDARG00000052907	57952	881.281	807.49	1095.95	1119.05	1068.33	1650.4	0.423555	-0.462738
LL0000001852	bcl7ba	ENSDARG00000111877	406444	37.9359	139.59	170.609	81.7392	78.5255	74.4468	0.655323	0.568839
LL0000001853	bcl7bb	ENSDARG00000040396	81595	226.643	337.343	443.391	256.895	384.872	370.3	0.995072	-0.00667901
LL0000001854	bcl9	ENSDARG00000036687	449616	872.527	1356.16	970.641	1076.23	1071.24	1148.61	0.961993	-0.0429848
LL0000001855	bcl9l	ENSDARG00000055054	449532	484.413	434.281	424.113	385.342	446.917	567.536	0.948316	-0.0599869
LL0000001856	bco1	ENSDARG00000104256	84039	184.816	239.436	116.631	162.505	215.218	209.805	0.918039	-0.119393
LL0000001857	bco1l	ENSDARG00000103659	393580	54.4721	27.1425	3.85558	21.4079	26.1752	20.3037	0.896722	0.332113
LL0000001858	bco2a	ENSDARG00000055722	793849	91.4354	31.02	79.0393	125.528	88.22	84.1152	0.629356	-0.563887
LL0000001859	bco2b	ENSDARG00000041715	678554	13.618	19.3875	21.2057	58.3851	73.6783	37.7068	0.0894239	-1.64675
LL0000001860	bco2l	ENSDARG00000027620	84041	49.6085	7.75501	26.989	23.354	76.5866	42.541	0.675867	-0.756385
LL0000001861	bcor	ENSDARG00000017798	402921	946.453	1841.81	1535.48	1547.21	1537.55	1317.81	0.980205	-0.0260509
LL0000001862	bcorl1	ENSDARG00000077912	792710	222.752	196.783	222.66	313.333	266.599	282.318	0.477857	-0.425084
LL0000001863	bcr	ENSDARG00000079286	568320	256.797	168.671	381.702	733.706	363.544	711.595	0.0705415	-1.16409
LL0000001864	bcs1l	ENSDARG00000012295	394157	0	129.896	86.7505	99.2547	130.876	168.23	0.705229	-0.878698
LL0000001865	bdh1	ENSDARG00000059388	100037356	477.604	579.687	487.73	420.373	536.106	597.508	0.992753	-0.00836164
LL0000001866	bdh2	ENSDARG00000052696	550507	326.833	285.966	290.132	79.793	229.76	293.92	0.549683	0.581281
LL0000001867	bdkrb1	ENSDARG00000020744	368199	0.972717	0	0	19.4617	2.90835	1.93368	1	-4.54482
LL0000001868	bdkrb2		100330960	0	11.6325	19.2779	13.6232	21.3279	0.966842	0.963154	-0.216351
LL0000001869	bdnf	ENSDARG00000018817	58118	186.762	194.845	329.652	644.182	419.772	487.288	0.0383681	-1.12492
LL0000001870	bean1	ENSDARG00000087413	101885923	154.662	287.905	319.049	504.058	297.621	317.124	0.484381	-0.554769
LL0000001871	becn1	ENSDARG00000079128	393846	102.135	185.151	260.251	229.648	152.204	117.955	0.92359	0.131676
LL0000001872	bend3	ENSDARG00000076903	565716	382.278	306.323	374.955	250.083	287.927	218.506	0.395762	0.491461
LL0000001873	BEND4	ENSDARG00000113607	566937	8.75445	15.51	4.81947	38.9234	24.2363	14.5026	0.396885	-1.41707
LL0000001874	bend5	ENSDARG00000075624	566161	266.524	547.698	521.467	428.158	391.658	427.344	0.925495	0.0989609
LL0000001875	best1	ENSDARG00000078331	560608	21.3998	60.1013	47.2308	41.8427	29.0835	22.2374	0.774319	0.466682
LL0000001876	best2	ENSDARG00000079163	567214	26.2633	7.75501	7.71115	29.1926	31.9919	14.5026	0.662515	-0.859203
LL0000001877	best4	ENSDARG00000078455	563711	36.9632	31.9894	24.0974	28.2195	37.8086	26.1047	0.993977	0.0142109
LL0000001878	bet1	ENSDARG00000034885	415135	493.167	470.147	264.107	162.505	340.277	386.737	0.612801	0.464489
LL0000001879	bet1l	ENSDARG00000032037	445493	279.17	411.985	240.974	132.34	228.79	271.682	0.48295	0.558707
LL0000001881	BFSP1	ENSDARG00000074919	560018	52.5267	164.794	24.0974	78.8199	81.4339	28.0384	0.853269	0.358566
LL0000001882	bfsp2	ENSDARG00000011998	494090	29.1815	40.7138	6.74726	25.3002	14.5418	9.66842	0.775687	0.630416
LL0000001884	bglapl	ENSDARG00000104467	337724	0.972717	14.5406	13.4945	36.0042	62.0449	7.73473	0.34417	-1.86631
LL0000001885	bgna	ENSDARG00000017884	431774	45.7177	30.0507	26.0251	107.039	175.471	83.1484	0.0145721	-1.84499
LL0000001886	bgnb	ENSDARG00000002945	792197	1077.77	1041.11	709.426	564.389	779.438	1259.79	0.909496	0.119399
LL0000001887	bhlha15	ENSDARG00000045166	777671	9.72717	5.81626	0	11.677	9.69451	2.90052	0.877441	-0.643269
LL0000001888	bhlha9	ENSDARG00000103981	323481	21.3998	2.90813	9.63894	9.73085	7.75561	0.966842	0.784807	0.879513
LL0000001889	bhlhe22	ENSDARG00000058039	393930	16.5362	98.8764	801.96	260.787	118.273	275.55	0.829156	0.486905
LL0000001890	bhlhe23	ENSDARG00000037588	559796	18.4816	125.05	524.358	690.891	316.041	207.871	0.617148	-0.862986
LL0000001891	bhlhe40	ENSDARG00000004060	324413	1636.11	2455.43	2790.47	2004.56	1936.96	2454.81	0.900481	0.105591
LL0000001892	bhlhe41	ENSDARG00000041691	563771	231.507	456.576	770.151	343.499	1265.13	1963.66	0.168618	-1.29261
LL0000001893	bhmt	ENSDARG00000013430	322228	173.144	253.977	520.503	1468.39	3426.04	2295.28	1.30731e-06	-2.9235
LL0000001894	bicc1a	ENSDARG00000061682	568201	34.0451	54.2851	34.7002	306.522	307.316	150.827	1.39721e-05	-2.63581
LL0000001895	bicc1b	ENSDARG00000070497	571411	127.426	227.803	130.126	956.543	1512.34	633.281	7.69297e-07	-2.67617
LL0000001896	bicc2	ENSDARG00000076557	402785	24.3179	19.3875	4.81947	43.7888	42.6558	51.2426	0.242787	-1.50494
LL0000001897	bicd1a	ENSDARG00000079496	556758	51.554	129.896	84.8227	174.182	147.357	190.468	0.218071	-0.943223
LL0000039762	bicd2	ENSDARG00000075571	557383	1350.13	1597.53	1146.07	706.46	665.043	671.955	0.00773184	1.0024
LL0000001900	bicdl1	ENSDARG00000074761	100537719	28.2088	23.265	54.942	98.2816	92.0978	29.9721	0.392112	-1.04991
LL0000001901	bicdl2	ENSDARG00000052427	777640	56.4176	206.477	106.992	89.5238	165.776	146.96	0.941304	-0.121046
LL0000001902	bicdl2l	ENSDARG00000091669	100334848	42.7995	112.448	121.451	59.3582	76.5866	146.96	0.986308	-0.0319891
LL0000001903	bicra	ENSDARG00000061159	386775	629.348	492.443	708.462	934.162	793.011	662.286	0.525165	-0.384624
LL0000001904	bicral	ENSDARG00000016089	559084	917.272	780.348	664.123	615.963	606.876	674.855	0.586868	0.315588
LL0000001905	bida	ENSDARG00000069290	559425	552.503	696.012	573.517	175.155	196.799	171.131	3.14794e-06	1.7463
LL0000001906	bik	ENSDARG00000045549	564030	317.106	213.263	168.681	160.559	349.972	376.101	0.742181	-0.342997
LL0000001907	bin1a	ENSDARG00000042114	563561	203.298	502.137	1006.31	890.373	719.333	1512.14	0.360826	-0.866914
LL0000001908	bin1b	ENSDARG00000058820	447863	138.126	139.59	106.028	99.2547	121.181	52.2094	0.622314	0.493136
LL0000001909	bin2a	ENSDARG00000003219	492780	59.3357	23.265	74.2198	29.1926	22.2974	62.8447	0.790392	0.455818
LL0000001910	bin2b	ENSDARG00000010255	327387	463.013	633.003	687.257	66.1698	182.257	145.993	0.000111661	2.17668
LL0000001911	bin3	ENSDARG00000099651	323976	1184.77	1493.81	731.596	422.319	521.565	763.805	0.0819998	0.99778
LL0000001912	birc2	ENSDARG00000044619	373107	2733.33	2683.23	2142.74	1337.02	1752.77	1852.47	0.167548	0.613076
LL0000001913	birc5a	ENSDARG00000075621	373110	860.854	868.561	637.134	262.733	544.831	556.901	0.193718	0.794424
LL0000001914	birc5b	ENSDARG00000055655	246726	39.8814	17.4488	0	10.7039	9.69451	0	0.696622	1.49087
LL0000001915	birc6	ENSDARG00000074166	796547	989.253	1029.48	1412.1	785.28	1033.43	673.889	0.43293	0.460918
LL0000001916	birc6-as2	ENSDARG00000097706	101885944	55.4448	61.0707	103.137	179.048	162.868	312.29	0.0177707	-1.57443
LL0000001917	birc7	ENSDARG00000058082	100073331	67.1174	75.6113	74.2198	71.0352	63.9838	52.2094	0.860231	0.21261
LL0000001918	bivm	ENSDARG00000061409		40.8541	18.4181	70.3643	132.34	63.9838	141.159	0.166731	-1.38021
LL0000001919	blcap	ENSDARG00000052073	57918	1847.19	1919.36	1380.3	616.936	1009.2	986.178	0.0343103	0.978349
LL0000001920	blf	ENSDARG00000043126	503516	1729.49	277.242	1898.87	37.9503	87.2506	71.5463	1.39246e-07	4.31109
LL0000001921	blk	ENSDARG00000007783	567764	93.3808	49.4382	148.44	43.7888	17.4501	62.8447	0.269388	1.231
LL0000001922	blm	ENSDARG00000077089	572540	216.916	75.6113	209.165	174.182	254.966	148.894	0.876253	-0.204361
LL0000001923	blmh	ENSDARG00000025977	336541	592.384	863.714	749.91	397.019	531.259	599.442	0.35174	0.530051
LL0000001924	blnk	ENSDARG00000042722	405764	0	59.132	47.2308	47.6812	42.6558	53.1763	0.881006	-0.432118
LL0000001925	bloc1s1	ENSDARG00000014171	556597	187.734	220.048	150.367	113.851	193.89	219.473	0.947178	0.0822063
LL0000001926	bloc1s2	ENSDARG00000046081	606665	223.725	240.405	268.926	134.286	184.196	251.379	0.659073	0.36329
LL0000001927	bloc1s3	ENSDARG00000068828	553529	40.8541	94.0295	100.245	97.3085	104.701	110.22	0.719737	-0.40907
LL0000001928	bloc1s4	ENSDARG00000007597	445081	125.48	188.059	364.352	180.021	203.585	239.777	0.927571	0.120986
LL0000001929	bloc1s5	ENSDARG00000111747	324781	213.998	189.028	153.259	101.201	139.601	166.297	0.573321	0.450374
LL0000001930	bloc1s6	ENSDARG00000042933	791215	513.594	533.157	526.286	228.675	392.628	407.04	0.294215	0.613208
LL0000001931	blvra	ENSDARG00000059857	767661	83.6536	44.5913	53.9781	54.4928	33.9308	39.6405	0.682723	0.508833
LL0000001932	blvrb	ENSDARG00000096829	436959	148.826	173.518	185.068	131.367	101.792	148.894	0.60279	0.409399
LL0000001933	blzf1	ENSDARG00000011299	114452	542.776	357.7	361.46	202.402	246.241	295.854	0.174766	0.761261
LL0000001934	bmb	ENSDARG00000096603	559540	54.4721	58.1626	41.4474	65.1967	123.12	49.3089	0.586354	-0.625029
LL0000001935	bmf1	ENSDARG00000090234	571949	21.3998	5.81626	22.1696	6.8116	0.969451	0	0.312056	2.66689
LL0000001936	bmf2	ENSDARG00000041414	751764	449.395	554.483	400.016	162.505	193.89	204.004	0.00204107	1.32488
LL0000001937	bmi1a	ENSDARG00000006010	321505	94.3535	149.284	269.89	313.333	243.332	340.328	0.305376	-0.804579
LL0000001938	bmi1b	ENSDARG00000013076	394249	240.261	289.843	424.113	498.22	404.261	621.679	0.26825	-0.675591
LL0000001939	bmp10	ENSDARG00000061769	562533	24.3179	29.0813	13.4945	34.058	12.6029	16.4363	0.974665	0.0843177
LL0000001940	bmp10l	ENSDARG00000109233		0	1.93875	10.6028	36.0042	31.9919	6.76789	0.27259	-2.57469
LL0000001941	bmp15	ENSDARG00000037491	334183	0	49.4382	8.67505	31.1387	17.4501	10.6353	0.994364	-0.0272513
LL0000001942	bmp16	ENSDARG00000103679	100329171	3380.19	2864.51	2532.15	211.159	167.715	218.506	3.64363e-28	3.87698
LL0000001943	bmp1a	ENSDARG00000028071	572452	650.747	781.317	622.676	801.822	1448.36	1030.65	0.2047	-0.675113
LL0000001944	bmp1b	ENSDARG00000028053	559877	445.504	559.33	340.255	127.474	142.509	178.866	0.000785137	1.58335
LL0000001945	bmp2a	ENSDARG00000013409	30631	64.1993	66.887	54.942	151.801	276.293	166.297	0.00468302	-1.67593
LL0000001946	bmp2b	ENSDARG00000041430	30632	27.2361	126.988	228.443	261.76	452.734	411.875	0.103737	-1.55744
LL0000001947	bmp2k	ENSDARG00000020009	494101	633.238	814.276	1013.05	475.839	637.899	631.348	0.392699	0.4957
LL0000001948	bmp3	ENSDARG00000060526	777717	964.935	916.061	1095.95	829.069	1423.15	961.041	0.897987	-0.110206
LL0000001949	bmp4	ENSDARG00000019995	30612	228.588	177.396	221.696	360.042	797.858	512.426	0.0085027	-1.41203
LL0000001950	bmp5	ENSDARG00000101701	394026	106.026	56.2238	73.256	293.872	529.32	273.616	0.00011364	-2.21953
LL0000001951	bmp6	ENSDARG00000015686	503761	638.102	546.728	299.771	89.5238	78.5255	108.286	2.12e-06	2.42554
LL0000001952	bmp7a	ENSDARG00000018260	30584	36.9632	9.69376	13.4945	31.1387	33.9308	37.7068	0.645165	-0.773069
LL0000001953	bmp7b	ENSDARG00000063230	557567	63.2266	131.835	198.562	207.267	493.45	263.948	0.104927	-1.29314
LL0000001954	bmp8a	ENSDARG00000035677	561963	350.178	133.774	288.204	127.474	233.638	180.799	0.595813	0.510815
LL0000001955	bmper	ENSDARG00000101980	338246	98.2444	96.9376	67.4726	315.28	582.64	204.004	0.00101169	-2.06883
LL0000001956	bmpr1aa	ENSDARG00000019728	58145	2150.68	1739.06	504.117	692.837	773.622	744.468	0.195799	0.990827
LL0000001957	bmpr1ab	ENSDARG00000105045	447846	717.865	865.653	587.012	723.002	953.94	603.309	0.941083	-0.0711504
LL0000001958	bmpr1ba	ENSDARG00000104100	30742	95.3262	119.233	109.884	284.141	415.894	223.34	0.0045333	-1.50893
LL0000001959	bmpr1bb	ENSDARG00000102742	100149664	16.5362	31.9894	39.5197	100.228	130.876	116.021	0.00694757	-1.97891
LL0000001960	bmpr2a	ENSDARG00000011941	562822	5512.38	6054.72	4906.22	1421.68	1478.41	1423.19	7.173e-11	1.92993
LL0000001961	bmpr2b	ENSDARG00000020057	555655	839.454	905.397	573.517	396.046	330.583	225.274	0.00904002	1.28424
LL0000001962	bms1	ENSDARG00000054154	553241	252.906	384.842	470.38	286.087	448.856	299.721	0.927972	0.0989896
LL0000001963	bmt2	ENSDARG00000062181	558558	230.534	266.578	261.215	214.079	200.676	308.422	0.948156	0.0684581
LL0000001964	BNC1	ENSDARG00000100757	568786	126.453	66.887	108.92	226.729	146.387	192.401	0.194181	-0.903781
LL0000001965	bnc2	ENSDARG00000069989	559327	982.444	1043.05	674.726	1335.07	1271.92	1068.36	0.425832	-0.444814
LL0000001966	bnip1a	ENSDARG00000078259	565822	1.94543	7.75501	42.4113	49.6273	33.9308	35.7731	0.557703	-1.19491
LL0000001967	bnip1b	ENSDARG00000104280	795732	160.498	221.987	200.49	130.393	137.662	136.325	0.424702	0.527737
LL0000001968	bnip2	ENSDARG00000013397	394197	1353.05	1456.97	871.36	313.333	462.428	339.361	6.99366e-05	1.72303
LL0000001969	bnip3	ENSDARG00000099961	336116	319.051	332.496	214.948	298.737	174.501	297.787	0.867913	0.168393
LL0000001970	bnip3la	ENSDARG00000025468	323563	1738.24	930.601	706.534	692.837	707.699	983.278	0.518398	0.501761
LL0000001971	bnip3lb	ENSDARG00000028067	554650	695.492	553.514	880.999	417.454	365.483	255.246	0.038149	1.03683
LL0000001972	bnip4	ENSDARG00000022832	568155	218.861	180.304	182.176	241.325	261.752	287.152	0.476277	-0.442918
LL0000001973	bnipl	ENSDARG00000060435	100149386	105.053	119.233	148.44	105.093	213.279	204.004	0.588566	-0.486965
LL0000001974	boc	ENSDARG00000074335	334628	896.845	1064.38	1202.94	3328.92	4923.84	2951.77	3.19872e-06	-1.82418
LL0000001975	bod1	ENSDARG00000103922	767743	316.133	285.966	357.605	208.24	217.157	375.135	0.768242	0.26161
LL0000001976	bod1l1	ENSDARG00000089505	100332682	280.142	253.007	212.057	204.348	233.638	123.756	0.617148	0.40774
LL0000001977	boka	ENSDARG00000052129	445218	53.4994	65.9176	54.942	78.8199	80.4644	130.524	0.400836	-0.73308
LL0000001978	bokb	ENSDARG00000008807	394160	36.9632	0	3.85558	44.7619	24.2363	27.0716	0.656733	-1.23508
LL0000001979	bola1	ENSDARG00000039915	445163	160.498	335.404	248.685	122.609	119.242	242.677	0.485605	0.619836
LL0000001980	BOLA2	ENSDARG00000111714	553698	565.148	542.851	298.807	84.6584	179.348	253.312	0.0346193	1.44323
LL0000001981	bola3	ENSDARG00000098130	445131	259.715	209.385	143.62	79.793	130.876	215.606	0.59988	0.523363
LL0000001982	bop1	ENSDARG00000063627	777627	467.877	338.312	518.575	191.698	349.972	231.075	0.20048	0.777669
LL0000001983	bora	ENSDARG00000042688	555606	63.2266	60.1013	105.064	86.6046	142.509	74.4468	0.721114	-0.410385
LL0000001984	borcs5	ENSDARG00000077830	449650	2.91815	47.4994	57.8336	57.412	66.8921	85.0821	0.587591	-0.951651
LL0000001985	borcs7	ENSDARG00000055070	664759	104.081	125.05	51.0864	87.5777	37.8086	103.452	0.843309	0.292152
LL0000001986	borcs8	ENSDARG00000071339	558180	106.026	145.406	109.884	113.851	137.662	241.71	0.639456	-0.449022
LL0000001987	bpgm	ENSDARG00000070826	436903	310.297	299.537	196.634	253.975	147.357	191.435	0.576024	0.444148
LL0000001988	bphl	ENSDARG00000102877	402804	112.835	140.56	146.512	86.6046	147.357	99.5847	0.798467	0.26179
LL0000001989	bpifcl	ENSDARG00000099980	100003132	0.972717	52.3463	207.237	24.3271	45.5642	31.9058	0.529833	1.35595
LL0000001990	bpnt1	ENSDARG00000043684	436627	186.762	203.569	180.248	108.986	101.792	176.932	0.458555	0.557401
LL0000001991	bptf	ENSDARG00000077361	324479	1302.47	1746.82	2558.18	1833.29	1980.59	1288.8	0.883363	0.136103
LL0000001992	braf	ENSDARG00000017661	403065	247.07	370.302	747.982	882.588	634.99	748.335	0.340034	-0.73078
LL0000001993	brap	ENSDARG00000008560	436739	461.068	386.781	293.024	226.729	213.279	215.606	0.118288	0.799196
LL0000001994	brat1	ENSDARG00000062585	678547	115.753	159.947	310.374	159.586	295.683	161.463	0.961279	-0.0735023
LL0000001995	brca2	ENSDARG00000079015	566758	469.822	336.374	300.735	233.54	297.621	206.904	0.35004	0.584723
LL0000001996	brcc3	ENSDARG00000098242	100333845	270.415	434.281	213.021	215.052	220.065	243.644	0.580914	0.435121
LL0000001997	brd1a	ENSDARG00000013596	569574	138.126	120.203	272.782	339.607	229.76	232.042	0.482402	-0.593446
LL0000001998	brd1b	ENSDARG00000051798	100009661	1400.71	1499.63	1397.65	1231.93	1205.03	926.234	0.493585	0.353837
LL0000001999	brd2a	ENSDARG00000022280	30445	10291.3	5835.65	10030.3	4200.81	6282.04	1963.66	0.107105	1.07147
LL0000002000	brd2b	ENSDARG00000046087	569354	156.607	134.743	125.306	135.259	104.701	99.5847	0.744938	0.295269
LL0000002001	brd3a	ENSDARG00000006527	327372	1309.28	1478.3	1344.63	1504.39	1384.38	1523.74	0.886169	-0.0946856
LL0000002002	brd3b	ENSDARG00000100129	327108	3319.88	3839.7	3699.43	3199.5	4228.74	3657.56	0.970165	-0.0298218
LL0000002003	brd4	ENSDARG00000078904	570531	4504.65	4269.13	3816.06	2345.14	3442.52	2634.64	0.19146	0.579972
LL0000002004	brd7	ENSDARG00000008380	406675	866.69	895.704	875.216	544.928	661.165	710.629	0.33432	0.460581
LL0000002005	brd8	ENSDARG00000025071	337414	692.574	781.317	907.988	721.056	793.011	798.611	0.959598	0.0425452
LL0000002006	brd9	ENSDARG00000017143	393245	206.216	456.576	240.974	269.545	213.279	199.169	0.650269	0.406207
LL0000002007	brdt	ENSDARG00000102802	333996	9104.63	3513.02	7799.83	2844.33	5419.23	2086.44	0.1757	0.980175
LL0000002008	brf1a	ENSDARG00000017835	334402	156.607	90.152	98.3172	98.2816	125.059	119.888	0.995034	0.0076726
LL0000002009	brf1b	ENSDARG00000005002	334316	121.59	232.65	328.688	228.675	236.546	200.136	0.978834	0.0376643
LL0000002010	brf2	ENSDARG00000002060	445142	194.543	105.662	79.0393	37.9503	42.6558	44.4747	0.0346559	1.60017
LL0000002011	bri3	ENSDARG00000086332	100002236	1061.23	1615.95	1191.37	354.203	378.086	345.162	6.31102e-07	1.84418
LL0000002012	bri3bp	ENSDARG00000010108	327046	1349.16	1655.69	2248.77	1949.09	1061.55	1398.05	0.757738	0.252972
LL0000002013	bricd5	ENSDARG00000056247	792755	0	62.0401	172.537	69.0891	261.752	58.9773	0.872644	-0.7327
LL0000002014	brinp1	ENSDARG00000078302	100334375	38.9087	132.805	147.476	401.884	158.99	779.274	0.0208506	-2.06985
LL0000002015	brinp2	ENSDARG00000014302	561009	135.208	81.4276	265.071	680.187	386.811	636.182	0.0056793	-1.82194
LL0000002016	brinp3a.1	ENSDARG00000076351	569746	3.89087	40.7138	72.2921	308.468	245.271	401.239	0.00267526	-3.03001
LL0000002017	brinp3a.2	ENSDARG00000061051	100001603	28.2088	21.3263	27.9529	175.155	81.4339	154.695	0.00050569	-2.40807
LL0000002018	brinp3b	ENSDARG00000075352	100330048	0	48.4688	37.5919	123.582	101.792	109.253	0.232525	-1.95901
LL0000002019	brip1	ENSDARG00000074410	794038	110.89	210.355	179.284	223.81	234.607	141.159	0.800479	-0.260438
LL0000002020	brk1	ENSDARG00000041974	415187	611.839	1660.54	1961.52	927.35	1189.52	2049.7	0.98783	0.0231327
LL0000002021	brms1	ENSDARG00000051955	791681	318.078	348.006	382.666	393.126	358.697	412.841	0.83784	-0.151229
LL0000002022	brms1la	ENSDARG00000006235	792017	511.649	483.719	889.674	844.638	740.66	837.285	0.614044	-0.361925
LL0000002023	brms1lb	ENSDARG00000018047	562889	96.2989	98.8764	65.5448	187.805	83.3728	122.789	0.531473	-0.595588
LL0000002024	brox	ENSDARG00000013659	492786	1121.54	926.724	507.972	313.333	205.524	342.262	0.00349837	1.56972
LL0000002025	brpf1	ENSDARG00000103665	393991	25.2906	46.5301	26.0251	71.0352	55.2587	22.2374	0.692658	-0.602118
LL0000002026	brpf3a	ENSDARG00000070513	100149254	564.176	366.424	291.096	393.126	299.56	543.365	0.989422	-0.016889
LL0000002027	brpf3b	ENSDARG00000074238	100003354	685.765	593.258	329.652	331.822	293.744	386.737	0.295816	0.668204
LL0000002028	brsk2b	ENSDARG00000077791	100149571	26.2633	62.0401	192.779	315.28	182.257	309.389	0.131593	-1.52131
LL0000002029	brwd1	ENSDARG00000074747	798858	554.448	537.034	934.977	892.319	733.874	655.519	0.845531	-0.171128
LL0000002030	brwd3	ENSDARG00000035540	553209	732.456	714.43	1141.25	758.033	1023.74	917.533	0.950128	-0.0606633
LL0000002031	bscl2	ENSDARG00000037008	567403	426.05	524.433	350.857	351.284	297.621	461.183	0.778931	0.229301
LL0000002032	bscl2l	ENSDARG00000025912	541427	3.89087	24.2344	0.963894	51.5735	47.5031	135.358	0.0432106	-3.01083
LL0000002033	bsdc1	ENSDARG00000052623	794882	1021.35	1126.42	787.502	555.632	736.783	754.136	0.323985	0.520282
LL0000002034	bsg	ENSDARG00000019881	337692	6475.37	8474.29	5985.78	3112.9	1877.83	3785.18	0.00737015	1.25433
LL0000002035	bsk146	ENSDARG00000099069	405767	149.798	79.4889	200.49	332.795	239.454	494.056	0.05524	-1.31093
LL0000002036	bsna		100004063	134.235	219.079	274.71	418.427	236.546	316.157	0.405745	-0.628784
LL0000002037	bsnb	ENSDARG00000079161	101175706	247.07	567.085	1193.3	1805.07	1209.87	2346.52	0.0642751	-1.41724
LL0000002038	bsnd	ENSDARG00000086265	497323	41.8268	31.9894	41.4474	33.0849	37.8086	10.6353	0.770158	0.499662
LL0000002039	bspry	ENSDARG00000104875	559377	83.6536	20.3569	16.3862	29.1926	43.6253	34.8063	0.945678	0.161616
LL0000002040	bsx	ENSDARG00000068976	573364	13.618	21.3263	5.78336	47.6812	15.5112	94.7505	0.162652	-1.95553
LL0000002041	btaf1	ENSDARG00000060089	565357	785.955	641.727	701.715	584.824	573.915	640.049	0.685544	0.243412
LL0000002042	btbd10a	ENSDARG00000062674	560466	386.168	794.889	846.299	798.903	788.164	782.175	0.800157	-0.224806
LL0000002043	btbd10b	ENSDARG00000020252	557247	3886.98	3763.12	2491.67	777.495	1057.67	931.068	7.97588e-07	1.87431
LL0000002044	btbd11a	ENSDARG00000063255	562893	288.897	377.087	385.558	271.491	411.047	458.283	0.902288	-0.11757
LL0000002045	btbd11b	ENSDARG00000063040	100034519	240.261	139.59	146.512	254.948	310.224	350.963	0.193411	-0.799565
LL0000002046	btbd16	ENSDARG00000027710	565632	0	5.81626	0	1.94617	12.6029	6.76789	1	-1.87402
LL0000002047	btbd17a	ENSDARG00000099321	563263	85.5991	49.4382	323.868	174.182	60.106	68.6458	0.709766	0.599294
LL0000002048	btbd17b	ENSDARG00000102472	563672	68.0902	40.7138	352.785	204.348	130.876	148.894	0.976232	-0.0686671
LL0000002050	btbd2a	ENSDARG00000042091	565970	354.069	379.995	511.828	654.886	637.899	1138.94	0.0729713	-0.96479
LL0000002051	btbd2b	ENSDARG00000104653	555499	787.9	1001.37	574.481	637.371	495.389	622.646	0.498451	0.429262
LL0000002052	btbd3a	ENSDARG00000005544	563691	711.056	781.317	508.936	470	392.628	468.918	0.26075	0.587829
LL0000002053	btbd3b	ENSDARG00000087517	562593	72.9537	136.682	117.595	161.532	47.5031	240.744	0.741264	-0.458896
LL0000002054	btbd6a	ENSDARG00000076440	100141360	191.625	418.771	457.85	688.944	623.357	405.107	0.359641	-0.68495
LL0000002055	btbd6b	ENSDARG00000032369	553533	1141.97	1348.4	1135.47	910.808	998.534	848.887	0.412985	0.394573
LL0000002056	btbd7	ENSDARG00000003069	568372	1150.72	1594.62	1527.77	882.588	1047.01	966.842	0.219309	0.561014
LL0000002057	btbd9	ENSDARG00000068983	557659	393.95	281.119	382.666	207.267	316.041	250.412	0.501443	0.451084
LL0000002058	btc	ENSDARG00000098112	503869	43.7722	45.5607	29.8807	63.2505	129.906	126.656	0.072841	-1.42381
LL0000002059	btd	ENSDARG00000099596	555376	1.94543	63.0095	24.0974	55.4659	99.8534	77.3473	0.405642	-1.3855
LL0000002060	btf3	ENSDARG00000035400	556625	25852.9	21806.1	18916.4	6188.82	14961.5	10897.3	0.0459415	1.05477
LL0000002061	btf3l4	ENSDARG00000089681	393667	893.927	871.469	719.065	424.265	793.011	1036.45	0.890564	0.1406
LL0000002062	btg1	ENSDARG00000027249	114432	38444.7	33825.4	27941.4	9539.15	17769.1	7236.81	0.00236623	1.5365
LL0000002063	btg2	ENSDARG00000020298	30079	57573.1	75780	29329.4	15094.5	23646.8	1282.03	0.0516555	2.02315
LL0000002064	btg3	ENSDARG00000069065	492479	1180.88	1317.38	1070.89	781.387	1089.66	763.805	0.414497	0.437852
LL0000002065	btg4	ENSDARG00000035171	378946	11.6726	0	8.67505	2.91926	2.90835	0.966842	1	1.58259
LL0000002066	btk	ENSDARG00000004433	568653	123.535	96.9376	209.165	31.1387	40.7169	90.8831	0.114329	1.40049
LL0000002067	btr01	ENSDARG00000051965	563047	72.9537	35.8669	42.4113	63.2505	43.6253	65.7452	0.901852	-0.190931
LL0000002068	btr02	ENSDARG00000052215	562439	45.7177	56.2238	26.989	45.735	42.6558	99.5847	0.693805	-0.544091
LL0000039763	btr04	ENSDARG00000060962	565512	129.371	329.588	207.237	166.398	152.204	248.478	0.8407	0.232392
LL0000002070	btr05	ENSDARG00000074813	794264	9.72717	0.969376	0.963894	23.354	48.4725	6.76789	0.190506	-2.75359
LL0000002071	btr06	ENSDARG00000054184	100151764	1.94543	16.4794	19.2779	31.1387	12.6029	4.83421	0.908887	-0.365222
LL0000002072	btr07	ENSDARG00000105558	793570	2.91815	0	0	17.5155	0.969451	1.93368	1	-2.80789
LL0000002073	btr09	ENSDARG00000054805	100170790	30.1542	88.2132	33.7363	36.0042	31.0224	51.2426	0.828363	0.362933
LL0000002074	btr12	ENSDARG00000051809	767681	129.371	87.2439	66.5087	101.201	114.395	122.789	0.817314	-0.257335
LL0000002075	btr16	ENSDARG00000028850	767728	11.6726	31.9894	14.4584	25.3002	26.1752	35.7731	0.743448	-0.586124
LL0000002076	btr18	ENSDARG00000103618	571162	11.6726	62.0401	8.67505	15.5694	15.5112	14.5026	0.691309	0.853894
LL0000002077	btr20	ENSDARG00000102992	678596	13.618	1.93875	0.963894	1.94617	0	7.73473	1	0.770545
LL0000002079	btr22	ENSDARG00000100539	100144555	0	5.81626	28.9168	22.381	24.2363	16.4363	0.782795	-0.859898
LL0000002080	btr23	ENSDARG00000099509	100334710	21.3998	15.51	23.1335	17.5155	21.3279	15.4695	0.950128	0.144753
LL0000002081	btr24	ENSDARG00000105283	100000030	0	0	9.63894	8.75777	5.81671	0	1	-0.595983
LL0000002082	btr25	ENSDARG00000102018	571141	17.5089	19.3875	39.5197	29.1926	31.0224	31.9058	0.885249	-0.269469
LL0000002083	btr26	ENSDARG00000105241	100149795	0	5.81626	30.8446	23.354	19.389	16.4363	0.834945	-0.6905
LL0000002084	btr29	ENSDARG00000099138	797384	20.427	28.1119	3.85558	16.5424	14.5418	2.90052	0.822478	0.624547
LL0000002085	btr30	ENSDARG00000102591	393394	0	0	0	31.1387	0	0	0.328481	-5.86417
LL0000002086	btr31	ENSDARG00000096304	555877	13.618	16.4794	55.9059	18.4886	10.664	10.6353	0.533668	1.11235
LL0000002087	btr32	ENSDARG00000053940	678629	0	1.93875	6.74726	2.91926	0.969451	1.93368	1	0.577659
LL0000002088	btr33	ENSDARG00000008164	799840	68.0902	20.3569	13.4945	42.8158	27.1446	25.1379	0.96752	0.100126
LL0000002089	bub1	ENSDARG00000077029	100307076	114.781	220.048	356.641	251.056	323.797	190.468	0.911854	-0.146337
LL0000002090	bub1ba	ENSDARG00000078825	567931	291.815	199.692	273.746	118.716	184.196	125.689	0.169492	0.83629
LL0000002091	bub1bb	ENSDARG00000074927	567006	461.068	253.977	268.926	198.509	321.858	248.478	0.682764	0.355884
LL0000002092	bub3	ENSDARG00000075883	403012	1041.78	980.039	1487.29	584.824	1104.2	681.623	0.380244	0.565825
LL0000002093	buc	ENSDARG00000096095	334375	19.4543	28.1119	14.4584	34.058	14.5418	15.4695	0.985549	-0.0467292
LL0000002094	buc2l	ENSDARG00000096628	100537720	86.5718	9.69376	10.6028	33.0849	19.389	7.73473	0.72525	0.827766
LL0000002095	bud23	ENSDARG00000063596	572367	346.287	329.588	321.941	111.905	292.774	231.075	0.394701	0.650271
LL0000002096	bud31	ENSDARG00000017084	445383	1483.39	1649.88	955.219	541.035	779.438	1205.65	0.293661	0.694626
LL0000002097	bves	ENSDARG00000058548	415107	3.89087	29.0813	7.71115	44.7619	38.778	57.0437	0.208359	-1.78893
LL0000002098	BX000363.1	ENSDARG00000088631	100535969	83.6536	4.84688	73.256	40.8696	33.9308	29.9721	0.762827	0.626589
LL0000002099	BX000364.1	ENSDARG00000097977		0	0	0	10.7039	4.84725	14.5026	0.0828957	-5.81313
LL0000002101	BX000434.1	ENSDARG00000097338		0	15.51	0	8.75777	12.6029	4.83421	0.880473	-0.756117
LL0000002102	BX000438.1	ENSDARG00000097767		94.3535	84.3357	38.5558	62.2775	83.3728	143.093	0.757537	-0.410602
LL0000002103	BX000438.2	ENSDARG00000098011		160.498	31.9894	39.5197	72.9814	130.876	270.716	0.437176	-1.03258
LL0000002105	BX000447.1	ENSDARG00000092245		0	0	14.4584	1.94617	4.84725	6.76789	1	0.0927049
LL0000002106	BX000451.1	ENSDARG00000097896	103911775	0	20.3569	11.5667	11.677	9.69451	8.70157	0.984575	0.0862933
LL0000002107	BX000460.1	ENSDARG00000117649		0	5.81626	10.6028	9.73085	0.969451	0	1	0.618225
LL0000002109	BX000463.2	ENSDARG00000117817		0	1.93875	0	10.7039	9.69451	0	1	-3.39542
LL0000002110	BX000522.1	ENSDARG00000117580		21.3998	0	5.78336	13.6232	12.6029	6.76789	0.948629	-0.279642
LL0000002112	BX000524.2	ENSDARG00000105500	110439918	0	2.90813	0	8.75777	4.84725	2.90052	1	-2.50493
LL0000002114	BX000534.2	ENSDARG00000096618		0	0	6.74726	13.6232	4.84725	3.86737	0.709386	-1.72613
LL0000002117	BX000701.1	ENSDARG00000099172	101882267	2.91815	17.4488	8.67505	23.354	21.3279	3.86737	0.787738	-0.741123
LL0000002118	BX000701.2	ENSDARG00000105074	101884528	0	14.5406	0	4.86543	0.969451	0	1	1.31759
LL0000002123	BX000981.5	ENSDARG00000096100		25.2906	1.93875	0	4.86543	7.75561	1.93368	0.837577	0.903489
LL0000002126	BX000991.1	ENSDARG00000092282		20.427	0	0	17.5155	0.969451	3.86737	0.984229	-0.130071
LL0000002127	BX001014.1	ENSDARG00000096704	100535964	0	0	9.63894	3.89234	5.81671	0.966842	1	-0.146855
LL0000002129	BX001023.1	ENSDARG00000098673		56.4176	43.6219	73.256	321.118	323.797	172.098	0.00010267	-2.23703
LL0000002130	BX001023.2	ENSDARG00000101163		0	4.84688	6.74726	59.3582	22.2974	57.0437	0.0185378	-3.57953
LL0000002131	BX001026.1	ENSDARG00000095883		0	18.4181	2.89168	11.677	0.969451	12.5689	0.962588	-0.242775
[truncated: 29,366 more rows]
