# Supplementary material for: An improved zebrafish transcriptome annotation for sensitive and comprehensive detection of cell type-specific genes
Source: eLife. 2020 Aug 24;9:e55792. doi: 10.7554/eLife.55792 (PMC7486121; doi:10.7554/eLife.55792)
Supplement: Figure 3—source data 7. — Gene expression levels were quantified using RSEM with the V4.3 annotation. Median ratio normalized expression values are shown for each replicate, along with adjusted p-value and log2 fold change. Matching Ensembl and NCBI gene IDs are included. [file elife-55792-fig3-data7.xlsx]

## Sheet: Sheet1
ID	LL ID	ENSDARG	NCBI ID	WTpdgfrb01	WTpdgfrb06	WTpdgfrb09	WTneg08	WTneg11	WTneg14	padj	log2 Fold Change
a1cf	LL0000000001	ENSDARG00000002968	562916	24.4368	3.92023	7.81161	11.8262	17.6659	16.6266	0.861097	-0.350585
a2ml	LL0000000002	ENSDARG00000056314	100006972	17.5945	10.7806	0.976451	18.7248	41.2204	178.981	0.0106451	-3.02522
aaas	LL0000000003	ENSDARG00000102274	378454	152.486	313.619	341.758	244.407	455.387	332.533	0.629074	-0.353732
aacs	LL0000000004	ENSDARG00000012468	393984	281.512	176.41	209.937	379.423	318.967	462.612	0.0850966	-0.797752		pdgfrbPos-enriched	2794
aadac	LL0000000005	ENSDARG00000063621	100148912	176.923	151.909	265.595	113.334	108.94	143.771	0.209497	0.699467		pdgfrbNeg-enriched	3184
aadacl4	LL0000000006	ENSDARG00000044802	569798	9.77472	0	3.90581	19.7103	13.7401	3.91215	0.516995	-1.44912
aadat	LL0000000007	ENSDARG00000011410	557979	45.9412	15.6809	74.2103	23.6523	60.8491	53.7921	0.986371	-0.0259093		pdgfrbPos-enriched annotated in Ens95/RefSeq	2612
aagab	LL0000000008	ENSDARG00000041170	436696	155.418	244.034	160.138	125.16	129.55	215.168	0.743872	0.252011		pdgfrbPos-enriched not annotated in Ens95	131
aak1a	LL0000000009	ENSDARG00000011855	568999	99.7022	66.6439	115.221	298.611	191.38	128.123	0.0496205	-1.13431		pdgfrbPos-enriched not annotated in RefSeq	113
aak1b	LL0000000010	ENSDARG00000077686	100534954	348.958	297.938	331.993	201.045	201.195	178.981	0.0692499	0.752079		pdgfrbPos-enriched not annotated in either	62
aamdc	LL0000000011	ENSDARG00000103957	553802	252.188	232.274	170.879	152.755	200.213	155.508	0.547335	0.366054
aamp	LL0000000012	ENSDARG00000045019	405874	983.337	486.109	952.04	356.756	813.611	778.518	0.67568	0.313235
aanat1	LL0000000013	ENSDARG00000036567	393677	19.5494	4.90029	49.799	53.2178	53.979	19.5607	0.583818	-0.771437
aanat2	LL0000000014	ENSDARG00000079802	30685	171.058	77.4246	103.504	59.1308	86.3665	85.0893	0.403665	0.61018
aar2	LL0000000015	ENSDARG00000018658	431768	233.616	191.111	184.549	98.5514	114.828	161.376	0.18677	0.701081
aars	LL0000000016	ENSDARG00000069142	324940	1230.64	1203.51	1284.03	854.441	1078.6	1011.29	0.441068	0.336653
aars2	LL0000000017	ENSDARG00000107385	792787	90.9049	128.388	93.7393	76.8701	106.977	111.496	0.928621	0.0838409
aarsd1	LL0000000018	ENSDARG00000015747	445178	10.7522	39.2023	15.6232	38.435	27.4802	44.0117	0.531437	-0.745422
aasdh	LL0000000019	ENSDARG00000022730	570338	14.6621	9.80058	22.4584	32.522	17.6659	33.2533	0.493944	-0.830414
aasdhppt	LL0000000020	ENSDARG00000037501	619247	133.914	196.992	208.961	71.9425	90.2922	91.9355	0.0290341	1.08676
aass	LL0000000021	ENSDARG00000051816	556229	280.535	195.032	150.374	176.407	160.956	196.586	0.751069	0.229312
aatf	LL0000000022	ENSDARG00000025467	559477	216.021	209.732	225.56	128.117	220.823	217.124	0.777841	0.202343
aatka	LL0000000023	ENSDARG00000078222	100004850	240.458	474.348	245.089	553.859	453.424	997.598	0.0503792	-1.0626
aatkb	LL0000000024	ENSDARG00000104442	555739	758.519	974.178	504.825	809.107	589.844	1024.98	0.881009	-0.115461
abat	LL0000000025	ENSDARG00000006031	378968	1121.16	1524.97	1022.34	1033.8	705.653	1506.18	0.803917	0.17667
abca12	LL0000000026	ENSDARG00000074749	558335	208.202	310.678	598.565	229.625	476.978	1464.12	0.258087	-0.957983
abca1a	LL0000000027	ENSDARG00000074635	558924	7277.28	5912.69	4814.88	2310.04	2800.04	2398.15	0.000187851	1.26184
abca1b	LL0000000028	ENSDARG00000079009	100136868	1146.58	1527.91	1327	283.828	658.544	533.03	0.000909845	1.4394
abca2	LL0000000029	ENSDARG00000013500	100006090	299.107	151.909	244.113	446.438	257.137	463.59	0.176947	-0.747639
abca3b	LL0000000030	ENSDARG00000100524	564344	1261.92	1560.25	1157.09	959.891	892.126	1315.46	0.516995	0.329157
abca4a	LL0000000031	ENSDARG00000057169	798993	66.4681	51.9431	109.363	223.712	109.921	62.5944	0.334865	-0.798608
abca4b	LL0000000032	ENSDARG00000062661	555506	122.184	59.7835	102.527	575.54	359.206	67.4846	0.017426	-1.81669
abca5	LL0000000033	ENSDARG00000074041	100151075	627.537	592.935	555.601	557.801	502.496	528.14	0.767546	0.161086
abcb10	LL0000000034	ENSDARG00000061591	100003744	95.7923	186.211	85.9277	95.5949	155.067	168.222	0.841742	-0.187203
abcb11a	LL0000000035	ENSDARG00000011573	797269	0.977472	3.92023	10.741	26.6089	18.6473	15.6486	0.17922	-1.96117
abcb11b	LL0000000036	ENSDARG00000070078	571189	46.9187	22.5413	34.1758	48.2902	37.2946	90.9575	0.411882	-0.768527
abcb4	LL0000000037	ENSDARG00000010936	100136865	16.617	18.6211	35.1523	26.6089	8.83293	35.2093	0.997504	-0.00533857
abcb5	LL0000000038	ENSDARG00000021787	798527	132.936	108.786	296.841	124.175	138.383	439.139	0.712162	-0.381753
abcb6a	LL0000000039	ENSDARG00000063297	564067	62.5582	87.2252	89.8335	112.349	89.3108	79.221	0.786432	-0.229179
abcb6b	LL0000000040	ENSDARG00000074254	100004801	50.8286	188.171	131.821	70.957	114.828	69.4407	0.548673	0.538922
abcb7	LL0000000041	ENSDARG00000062795	566515	199.404	405.744	273.406	234.552	276.765	253.312	0.782706	0.200349
abcb8	LL0000000042	ENSDARG00000056672	548340	49.8511	152.889	134.75	152.755	183.529	124.211	0.588037	-0.448342
abcb9	LL0000000043	ENSDARG00000056200	570148	29.3242	46.0627	26.3642	76.8701	48.0904	75.3089	0.197768	-0.976966
abcc1	LL0000000044	ENSDARG00000104719	100002010	308.881	424.365	233.372	262.147	231.619	187.783	0.369932	0.504139
abcc10	LL0000000045	ENSDARG00000077988	556709	82.1077	186.211	109.363	136.001	102.069	63.5724	0.718566	0.324373
abcc12	LL0000000046	ENSDARG00000013050	568482	27.3692	13.7208	44.9168	14.7827	36.3132	58.6822	0.808914	-0.352137
abcc13	LL0000000047	ENSDARG00000062519	559093	9.77472	16.661	41.9874	103.479	34.3503	56.7262	0.11378	-1.50747
abcc2	LL0000000048	ENSDARG00000014031	393561	33.2341	16.661	41.9874	41.3916	63.7934	174.091	0.0588392	-1.60384
abcc3	LL0000000049	ENSDARG00000096662	323301	665.659	1006.52	884.665	463.192	522.125	547.701	0.0641554	0.737978
abcc4	LL0000000050	ENSDARG00000058953	368620	451.592	260.695	216.772	123.189	211.009	204.41	0.172553	0.7865
abcc5	LL0000000051	ENSDARG00000061233	336147	6310.56	6349.8	4939.87	3642.46	4339.91	5643.28	0.434253	0.369266
abcc6a	LL0000000052	ENSDARG00000016750	566555	63.5357	179.351	161.114	71.9425	56.9233	31.2972	0.0557834	1.33493
abcc6b.1	LL0000000053	ENSDARG00000105403	110439293	66.4681	6.86041	81.0455	17.7393	26.4988	20.5388	0.293492	1.25291
abcc6b.2	LL0000000054	ENSDARG00000094901	100002917	48.8736	16.661	23.4348	50.2612	59.8677	29.3411	0.554155	-0.648467
abcc8	LL0000000055	ENSDARG00000051879	553281	163.238	66.6439	83.9748	150.784	70.6635	216.146	0.598346	-0.479492
abcc8b	LL0000000056	ENSDARG00000077007	100329706	50.8286	34.302	53.7048	155.711	149.178	36.1874	0.100304	-1.29662
abcc9	LL0000000057	ENSDARG00000015985	561160	923.711	470.428	798.737	77.8556	36.3132	37.1654	2.55218e-14	3.85723
abcd1	LL0000000058	ENSDARG00000074876	566367	42.0313	88.2052	55.6577	67.015	48.0904	24.4509	0.696644	0.413741
abcd2	LL0000000059	ENSDARG00000059409	100537809	243.391	85.265	135.727	156.697	185.492	113.452	0.979692	0.0274582
ABCD2_1_of_many	LL0000000060	ENSDARG00000099178	101882118	31.2791	3.92023	11.7174	23.6523	20.6102	12.7145	0.885975	-0.280098
abcd3a	LL0000000061	ENSDARG00000104085	406803	280.535	557.653	374.957	368.582	437.721	639.636	0.720621	-0.253287
abcd3b	LL0000000062	ENSDARG00000002947	100170781	1428.09	1535.75	943.252	308.466	1078.6	67.4846	0.359245	1.42553
abcd4	LL0000000063	ENSDARG00000061770	767748	146.621	286.177	154.279	128.117	177.64	181.915	0.728331	0.267581
abce1	LL0000000064	ENSDARG00000007216	406324	1907.05	1789.59	2014.42	1182.62	2317.17	1607.89	0.803373	0.161085
abcf1	LL0000000065	ENSDARG00000031795	406467	1125.07	1128.05	1448.08	733.222	1463.32	1392.73	0.956279	0.0442931
abcf2a	LL0000000066	ENSDARG00000038785	336770	729.194	816.388	1106.32	545.975	1013.82	573.13	0.616399	0.314193
abcf2b	LL0000000067	ENSDARG00000052331	100000576	27.3692	40.1824	38.0816	44.3481	30.4245	50.8579	0.826505	-0.250165
abcf3	LL0000000068	ENSDARG00000089705	100331227	67.4456	98.9859	64.4458	72.928	83.4221	54.7701	0.896382	0.129064
abcg1	LL0000000069	ENSDARG00000063475	556979	105.567	119.567	163.067	708.585	349.392	164.31	0.00679465	-1.65466
abcg2a	LL0000000070	ENSDARG00000100075	735312	28.3467	16.661	41.9874	58.1453	96.1808	224.949	0.00452315	-2.12422
abcg2b	LL0000000071	ENSDARG00000079361	570453	4.88736	0.980058	8.78806	9.85514	10.7958	6.84626	1	-0.907532
abcg2c	LL0000000072	ENSDARG00000058574	569858	496.556	729.163	486.273	346.901	506.422	327.643	0.293229	0.535703
abcg2d	LL0000000073	ENSDARG00000016818	735310	45.9412	25.4815	71.281	155.711	219.842	52.814	0.0371095	-1.58572
abcg4a	LL0000000074	ENSDARG00000061047	564842	38.1214	19.6012	37.1052	170.494	96.1808	286.565	4.42309e-05	-2.54447
abcg4b	LL0000000075	ENSDARG00000078068	794238	21.5044	13.7208	10.741	77.8556	93.2365	49.8799	0.00149129	-2.26518
abcg5	LL0000000076	ENSDARG00000063078	557317	10.7522	0	6.83516	8.86963	1.96287	10.7584	1	-0.295768
abcg8	LL0000000077	ENSDARG00000063059	100136850	3.90989	10.7806	1.9529	23.6523	8.83293	13.6925	0.379614	-1.47244
abch1	LL0000000078	ENSDARG00000071341	558667	60.6033	98.9859	87.8806	117.276	108.94	151.596	0.338796	-0.610463
abhd10a	LL0000000079	ENSDARG00000076435	568517	275.647	438.086	209.937	174.436	126.605	211.256	0.121307	0.850361
abhd10b	LL0000000080		492622	165.193	331.26	252.901	71.9425	178.622	215.168	0.336663	0.686069
abhd11	LL0000000081	ENSDARG00000069501	446169	165.193	238.154	236.301	218.784	205.12	412.732	0.572655	-0.387362
abhd12	LL0000000082	ENSDARG00000071004	767657	795.663	884.992	857.324	358.727	627.138	1041.61	0.645459	0.323972
abhd13	LL0000000083	ENSDARG00000059209	561333	136.846	191.111	128.892	131.073	95.1994	84.1112	0.372173	0.557709
abhd14a	LL0000000084	ENSDARG00000058367	404598	396.854	366.542	373.004	429.684	443.61	440.117	0.693301	-0.208847
abhd14b	LL0000000085	ENSDARG00000100531	393338	96.7698	230.314	103.504	66.0294	65.7563	111.496	0.250281	0.823573
abhd15a	LL0000000086	ENSDARG00000078768	560644	517.083	424.365	471.626	209.914	306.208	356.006	0.127497	0.69619
abhd16a	LL0000000087	ENSDARG00000078929	564613	285.422	402.804	303.676	463.192	394.538	464.568	0.401866	-0.414789
abhd17aa	LL0000000088	ENSDARG00000091433	322121	361.665	504.73	391.557	473.047	361.169	535.964	0.855281	-0.123303
abhd17ab	LL0000000089	ENSDARG00000043084	100003419	828.897	1146.67	741.127	596.236	521.143	550.635	0.0845519	0.703717
abhd17b	LL0000000090	ENSDARG00000035571	437017	641.222	646.838	443.309	263.132	280.691	271.894	0.00441598	1.08576
abhd17c	LL0000000091	ENSDARG00000058452	393126	502.421	625.277	498.967	554.844	450.48	659.197	0.962927	-0.033204
abhd18	LL0000000092	ENSDARG00000101961	503769	109.477	196.992	172.832	137.972	132.494	124.211	0.69651	0.280258
abhd2a	LL0000000093	ENSDARG00000025797	393888	1578.62	663.499	821.196	472.061	680.136	677.78	0.167688	0.743261
abhd2b	LL0000000094	ENSDARG00000045804	559290	97.7472	108.786	33.1993	242.436	105.995	166.266	0.123043	-1.10232
abhd3	LL0000000095	ENSDARG00000018809	447830	323.543	343.02	406.204	368.582	380.798	711.033	0.447479	-0.445061
abhd4	LL0000000096	ENSDARG00000102887	550276	853.333	586.075	353.475	207.943	194.325	225.927	0.000908072	1.51299
abhd6a	LL0000000097	ENSDARG00000060756	799085	78.1978	66.6439	44.9168	2770.28	2462.43	906.641	3.15042e-20	-5.01586
abhd6b	LL0000000098	ENSDARG00000070894	558995	40.0764	53.9032	39.0581	25.6234	31.406	22.4949	0.411245	0.742365
abhd8a	LL0000000099	ENSDARG00000103518	558563	21.5044	6.86041	15.6232	39.4206	16.6844	36.1874	0.368442	-1.06897
abhd8b	LL0000000100	ENSDARG00000076620	101883400	63.5357	56.8434	99.598	79.8266	69.682	41.0776	0.839915	0.207037
abi1a	LL0000000101	ENSDARG00000010155	393711	1295.15	1022.2	869.042	493.743	547.642	543.789	0.00541088	1.00728
abi1b	LL0000000102	ENSDARG00000062991	767738	59.6258	88.2052	58.5871	246.378	236.526	488.041	8.8795e-06	-2.2339
abi2a	LL0000000103	ENSDARG00000058207	767646	358.732	577.254	492.132	288.756	348.41	261.136	0.146462	0.668843
abi2b	LL0000000104	ENSDARG00000014875	692331	1337.18	1500.47	1430.5	788.411	1029.53	1561.93	0.548902	0.336633
abi3a	LL0000000105	ENSDARG00000060072	767807	25.4143	77.4246	37.1052	223.712	272.84	602.471	1.63274e-06	-2.97342
abi3b	LL0000000106	ENSDARG00000063283	566059	30.3016	9.80058	49.799	42.3771	115.81	166.266	0.0311141	-1.85154
abi3bpa	LL0000000107	ENSDARG00000062156	101884149	1157.33	812.468	994.028	188.233	463.238	362.852	0.000636754	1.54692
abi3bpb	LL0000000108	ENSDARG00000071095	100149890	4478.78	10600.3	8103.57	2281.46	4229.99	2899.88	0.00519794	1.30057
abl1	LL0000000109	ENSDARG00000035187	100000720	3781.84	4948.31	3325.79	1289.05	2244.55	1020.09	0.00111366	1.40464
abl2	LL0000000110	ENSDARG00000013841	570636	212.112	208.752	220.678	211.886	263.025	229.839	0.837528	-0.135573
ablim1a	LL0000000111	ENSDARG00000060149	100003558	23.4593	60.7636	78.1161	253.277	43.1832	160.398	0.0788377	-1.4927
ablim1b	LL0000000112	ENSDARG00000045064	541550	4440.66	6450.74	4259.28	1555.14	1903.99	2406.95	0.000219198	1.36891
ablim2	LL0000000113	ENSDARG00000055223	568454	188.652	158.769	161.114	218.784	160.956	267.004	0.579561	-0.346858
ablim3	LL0000000114	ENSDARG00000088168	566821	233.616	212.673	211.89	718.44	361.169	285.587	0.0424134	-1.05252
abo	LL0000000115	ENSDARG00000019207	563897	17.5945	34.302	11.7174	33.5075	40.2389	19.5607	0.671273	-0.552699
abr	LL0000000116	ENSDARG00000095180	565190	1.95494	0.980058	3.90581	10.8407	7.8515	0	1	-1.44973
abraa	LL0000000117	ENSDARG00000038583	324520	28.3467	25.4815	26.3642	58.1453	62.812	45.9678	0.155913	-1.05762
abrab	LL0000000118	ENSDARG00000033854	445477	104.59	21.5613	58.5871	128.117	62.812	65.5285	0.667487	-0.473131
abracl	LL0000000119	ENSDARG00000042876	336650	296.174	304.798	289.03	272.002	317.986	622.032	0.480697	-0.445568
abraxas1	LL0000000120	ENSDARG00000043339	449820	157.373	131.328	111.315	77.8556	103.051	102.694	0.431397	0.496151
abraxas2	LL0000000121	ENSDARG00000098907	406584	169.103	180.331	127.915	145.856	148.197	236.685	0.848008	-0.153018
abt1	LL0000000122	ENSDARG00000043666	553568	131.959	85.265	144.515	104.464	161.937	153.552	0.791393	-0.215288
abtb1	LL0000000123	ENSDARG00000063354	100536189	399.786	430.245	428.662	228.639	354.299	330.577	0.350219	0.4624
abtb2a	LL0000000124	ENSDARG00000059751	559451	236.548	361.641	331.993	94.6093	72.6263	62.5944	4.14401e-06	2.01703
abtb2b	LL0000000125	ENSDARG00000062000	100007078	414.448	718.383	365.193	137.972	156.048	112.474	2.32785e-05	1.88176
acaa1	LL0000000126	ENSDARG00000004687	431754	83.0852	217.573	202.125	71.9425	125.624	217.124	0.783511	0.277824
acaa2	LL0000000127	ENSDARG00000038881	406325	188.652	738.964	643.481	335.075	429.869	382.413	0.562239	0.45345
acaca	LL0000000128	ENSDARG00000078512	559403	535.655	551.773	510.684	522.322	656.581	803.947	0.548193	-0.311226
acacb	LL0000000129	ENSDARG00000061994	556236	650.997	1181.95	719.645	372.524	406.315	362.852	0.00455394	1.16078
acad11	LL0000000130	ENSDARG00000045411	393147	95.7923	96.0457	93.7393	56.1743	95.1994	103.672	0.858018	0.163039
acad8	LL0000000131	ENSDARG00000042658	394130	196.472	271.476	289.03	168.523	198.25	270.916	0.716636	0.247354
acad9	LL0000000132	ENSDARG00000055620	724002	386.102	450.827	301.723	245.393	270.877	428.38	0.681947	0.269432
acadl	LL0000000133	ENSDARG00000088357	394156	575.731	884.992	722.574	480.931	426.925	615.186	0.274714	0.519537
acadm	LL0000000134	ENSDARG00000038900	406283	2035.1	2410.94	1876.74	840.643	951.013	1252.87	0.00325961	1.05433
acads	LL0000000135	ENSDARG00000030781	445288	170.08	341.06	291.959	130.088	195.306	310.038	0.667236	0.337782
acadsb	LL0000000136	ENSDARG00000076780	110437777	87.9725	94.0856	160.138	110.378	111.884	68.4626	0.790886	0.235251
acadvl	LL0000000137	ENSDARG00000016687	573723	767.316	1146.67	938.37	656.352	796.927	979.993	0.691968	0.229239
acana	LL0000000138	ENSDARG00000035891	497505	7697.59	3773.22	3926.31	243.422	250.266	105.628	8.48177e-20	4.68325
acanb	LL0000000139	ENSDARG00000045799	559593	896.342	639.978	1059.45	69.9715	51.0347	17.6047	1.64049e-14	4.22733
acap1	LL0000000140	ENSDARG00000056346	561771	158.351	111.727	114.245	108.407	184.51	247.443	0.479371	-0.491658
acap2	LL0000000141	ENSDARG00000060783	100124613	114.364	104.866	82.0219	37.4495	53.979	40.0995	0.041688	1.19557
acap3a	LL0000000142	ENSDARG00000075990	322991	733.104	735.044	419.874	215.828	263.025	251.356	0.000835765	1.37048
acap3b	LL0000000143	ENSDARG00000099240	100009646	84.0626	66.6439	71.281	96.5804	80.4778	115.408	0.586807	-0.397807
acat1	LL0000000144	ENSDARG00000045888	445290	516.105	842.85	661.058	582.439	416.129	469.458	0.36045	0.460493
acat2	LL0000000145	ENSDARG00000007127	30643	91.8824	254.815	140.609	222.726	201.195	273.85	0.462287	-0.51797
acbd3	LL0000000146	ENSDARG00000042623	406270	538.587	769.346	579.036	449.394	443.61	653.329	0.617073	0.287196
acbd4	LL0000000147	ENSDARG00000027070	406368	29.3242	43.1226	21.4819	24.6378	23.5545	53.7921	0.936154	-0.118915
acbd5a	LL0000000148	ENSDARG00000034883	553674	80.1527	163.67	111.315	212.871	102.069	154.53	0.609886	-0.402651
acbd5b	LL0000000149	ENSDARG00000058410	100004736	4.88736	0	0	11.8262	0.981437	1.95607	1	-1.59453
acbd6	LL0000000150	ENSDARG00000039456	324090	247.301	274.416	196.267	205.972	203.157	191.695	0.672576	0.256999
acbd7	LL0000000151	ENSDARG00000094730	619256	17.5945	48.0228	113.268	302.553	367.057	492.931	4.12502e-05	-2.70013
accs	LL0000000152	ENSDARG00000052124	541510	76.2428	173.47	98.6216	182.32	156.048	138.881	0.531674	-0.45429
acd	LL0000000153	ENSDARG00000078055	794664	144.666	195.032	155.256	156.697	148.197	175.069	0.957507	0.0443412
ace	LL0000000154	ENSDARG00000079166	565980	401.741	588.035	544.86	142.9	234.563	141.815	0.00022871	1.56331
ace2	LL0000000155	ENSDARG00000016918	492331	38.1214	0	23.4348	11.8262	28.4617	189.739	0.541325	-1.90181
acer1	LL0000000156	ENSDARG00000010347	550266	10.7522	16.661	22.4584	40.4061	21.5916	49.8799	0.249948	-1.16563
acer2	LL0000000157	ENSDARG00000077782	100331179	114.364	128.388	97.6451	72.928	44.1647	24.4509	0.0563723	1.26616
acer3	LL0000000158	ENSDARG00000093366	555411	6.84231	10.7806	8.78806	9.85514	10.7958	9.78037	0.925112	-0.204461
ache	LL0000000159	ENSDARG00000031796	114549	225.796	384.183	270.477	833.745	436.739	1256.78	0.00271871	-1.52127
acin1a	LL0000000160	ENSDARG00000054290	368893	8876.43	9253.71	8543.95	6445.26	7993.8	5381.16	0.304225	0.428466
acin1b	LL0000000161	ENSDARG00000026842	327495	979.427	1203.51	1327	1130.38	1206.19	1084.64	0.955085	0.0369381
ACKR2	LL0000000162	ENSDARG00000086314	101887081	11.7297	34.302	38.0816	41.3916	44.1647	22.4949	0.788019	-0.361242
ackr3a	LL0000000163	ENSDARG00000062478	100000764	40.0764	75.4645	82.0219	37.4495	34.3503	18.5827	0.157001	1.12834
ackr3b	LL0000000164	ENSDARG00000058179	561050	3824.85	7190.69	4359.86	890.905	1492.77	1273.4	3.37437e-07	2.07185
ackr4a	LL0000000165	ENSDARG00000078729	100003167	24.4368	93.1055	121.08	19.7103	36.3132	31.2972	0.09685	1.45025
ackr4b	LL0000000166	ENSDARG00000040133	641390	218.954	166.61	268.524	59.1308	70.6635	80.1991	0.000408634	1.63909
aclya	LL0000000167	ENSDARG00000099079	436922	251.21	364.582	344.687	278.9	312.097	451.853	0.873002	-0.118739
aclyb	LL0000000168	ENSDARG00000055652	794259	78.1978	94.0856	46.8697	37.4495	46.1275	60.6383	0.467034	0.603583
acmsd	LL0000000169	ENSDARG00000062549	557166	2.93242	0	14.6468	7.88411	17.6659	31.2972	0.37775	-1.69303
aco1	LL0000000170	ENSDARG00000026376	568448	586.483	736.024	533.142	325.22	387.668	401.973	0.0676176	0.735039
aco2	LL0000000171	ENSDARG00000007294	322670	966.72	1616.12	1672.66	1708.88	1559.5	1931.62	0.602561	-0.289188
acod1	LL0000000172	ENSDARG00000069844	795305	25.4143	25.4815	15.6232	64.0584	247.322	31.2972	0.00803085	-2.36504
acot11a	LL0000000173	ENSDARG00000058229	554842	32.2566	15.6809	6.83516	14.7827	13.7401	13.6925	0.83014	0.375695
acot11b	LL0000000174	ENSDARG00000042122	641574	38.1214	25.4815	15.6232	31.5364	23.5545	15.6486	0.915472	0.163586
ACOT12	LL0000000175	ENSDARG00000054534	100536873	296.174	120.547	173.808	59.1308	145.253	228.861	0.631973	0.446768
acot13	LL0000000176	ENSDARG00000061728	564010	33.2341	63.7038	50.7755	43.3626	67.7192	120.299	0.471745	-0.647602
acot14	LL0000000177	ENSDARG00000089159	557184	244.368	557.653	249.972	120.233	145.253	148.662	0.00931597	1.34487
acot15	LL0000000178	ENSDARG00000045522	557032	683.253	821.289	403.274	159.653	158.011	215.168	2.06388e-05	1.84013
acot16	LL0000000179	ENSDARG00000069292	402867	11.7297	1.96012	6.83516	11.8262	4.90719	18.5827	0.707491	-0.782896
acot17	LL0000000180	ENSDARG00000088524	572757	0	9.80058	8.78806	21.6813	7.8515	10.7584	0.605674	-1.116
acot18	LL0000000181	ENSDARG00000033413	556673	92.8599	154.849	144.515	69.9715	100.107	105.628	0.455146	0.508477
acot19	LL0000000182	ENSDARG00000040427	492778	13.6846	6.86041	18.5526	18.7248	13.7401	16.6266	0.850293	-0.328245
acot20	LL0000000183	ENSDARG00000042510	553440	195.494	251.875	224.584	151.769	129.55	267.004	0.686127	0.293277
acot21	LL0000000184	ENSDARG00000042513	562047	9.77472	0.980058	9.76451	16.7537	10.7958	5.86822	0.750824	-0.703276
acot22	LL0000000185	ENSDARG00000058945	553217	5.86483	3.92023	14.6468	19.7103	14.7216	5.86822	0.707917	-0.721676
acot7	LL0000000186	ENSDARG00000018653	447878	48.8736	24.5015	30.27	38.435	21.5916	58.6822	0.885691	-0.19582
acot8	LL0000000187	ENSDARG00000014138	450052	93.8373	49.0029	28.3171	37.4495	21.5916	45.9678	0.493846	0.704771
acot9.1	LL0000000188	ENSDARG00000058352	798073	162.26	504.73	281.218	173.45	142.308	234.729	0.229265	0.784456
acot9.2	LL0000000189	ENSDARG00000058390	798008	8.79725	7.84046	3.90581	11.8262	10.7958	20.5388	0.510562	-1.07122
acox1	LL0000000190	ENSDARG00000014727	449662	695.96	1086.88	702.069	464.177	401.408	564.328	0.0643339	0.797253
acox3	LL0000000191	ENSDARG00000038865	406421	184.742	233.254	74.2103	52.2322	57.9048	67.4846	0.0179493	1.47039
acoxl	LL0000000192	ENSDARG00000020149	569104	235.571	212.673	204.078	250.321	244.378	271.894	0.689962	-0.232884
acp1	LL0000000193	ENSDARG00000076486	541489	242.413	242.074	253.877	188.233	244.378	255.268	0.884759	0.102152
acp2	LL0000000194	ENSDARG00000007244	503759	38.1214	137.208	104.48	61.1019	55.9419	22.4949	0.256543	1.00388
acp5a	LL0000000195	ENSDARG00000019763	406801	25.4143	68.6041	46.8697	43.3626	154.086	69.4407	0.312281	-0.921762
acp5b	LL0000000196	ENSDARG00000101456	436725	34.2115	27.4416	26.3642	15.7682	63.7934	14.6706	0.954674	-0.0984364
acp6	LL0000000197	ENSDARG00000040064	558758	39.0989	69.5841	30.27	45.3336	47.109	42.0556	0.971264	0.0469466
acp7	LL0000000198	ENSDARG00000102421	571830	67.4456	18.6211	47.8461	34.493	65.7563	40.0995	0.962533	-0.067683
acsbg1	LL0000000199	ENSDARG00000062077	100006023	195.494	174.45	178.691	239.48	155.067	249.4	0.733924	-0.231092
acsbg2	LL0000000200	ENSDARG00000004094	335159	412.493	778.166	456.003	922.441	910.774	1367.3	0.0364544	-0.958776
acsf2	LL0000000201	ENSDARG00000061201	751707	420.313	1343.66	940.323	228.639	364.113	308.082	0.00214097	1.5859
ACSF3	LL0000000202	ENSDARG00000059503	562292	28.3467	66.6439	47.8461	44.3481	83.4221	65.5285	0.656981	-0.436558
acsl1a	LL0000000203	ENSDARG00000030514	555308	290.309	467.488	371.052	329.162	436.739	553.569	0.735329	-0.225139
acsl1b	LL0000000204	ENSDARG00000003854	445175	477.007	494.929	449.168	256.234	365.095	360.896	0.239353	0.53286
acsl2	LL0000000205	ENSDARG00000078399	100332846	26.3918	19.6012	22.4584	187.248	241.434	171.157	2.13065e-10	-3.13137
acsl3a	LL0000000206	ENSDARG00000032079	567157	79.1753	30.3818	75.1868	89.6818	139.364	123.233	0.182502	-0.93115
acsl3b	LL0000000207	ENSDARG00000014674	559656	861.153	809.528	726.48	1005.22	924.514	1177.56	0.394401	-0.374338
acsl4a	LL0000000208	ENSDARG00000004078	393622	604.078	910.474	429.639	780.527	332.707	386.325	0.612991	0.374647
acsl4b	LL0000000209	ENSDARG00000010752	334561	656.861	917.334	663.011	299.596	473.053	311.016	0.0117124	1.04577
acsl5	LL0000000210	ENSDARG00000075931	447860	20.5269	9.80058	5.85871	11.8262	7.8515	32.2752	0.778629	-0.521948
acsm3	LL0000000211	ENSDARG00000004880	100002035	383.169	784.046	367.146	143.885	135.438	104.65	2.16009e-05	1.99858
acss1	LL0000000212	ENSDARG00000044142	541435	332.341	471.408	249.972	156.697	261.062	164.31	0.102538	0.856209
acss2	LL0000000213	ENSDARG00000037781	436914	195.494	459.647	519.472	524.293	447.535	578.02	0.556546	-0.399944
acss2l	LL0000000214	ENSDARG00000069029	560020	22.4819	4.90029	32.2229	35.4785	34.3503	18.5827	0.70011	-0.56859
acss3	LL0000000215	ENSDARG00000032218	566019	171.058	161.71	167.95	163.595	184.51	302.214	0.560205	-0.377199
acta1a	LL0000000216	ENSDARG00000036371	550445	820.099	956.537	626.882	529.221	629.101	266.026	0.153743	0.754861
acta1b	LL0000000217	ENSDARG00000055618	407658	281.512	587.055	142.562	157.682	90.2922	257.224	0.182265	1.001
acta2	LL0000000218	ENSDARG00000045180	322509	4549.16	4141.73	4837.34	177.393	310.134	264.07	4.79589e-29	4.16983
actb1	LL0000000219	ENSDARG00000037746	57934	48836.5	92356.7	58981.6	27596.4	34125.5	17457	0.00200831	1.33807
actb2	LL0000000220	ENSDARG00000037870	57935	184025	180494	133489	49408.7	75244.8	68976.1	9.77754e-05	1.36287
actc1a	LL0000039756	ENSDARG00000042535	408256	334.296	1051.6	261.689	884.992	1580.11	1506.18	0.0453701	-1.26927
actc1b	LL0000000222	ENSDARG00000099197	58114	1860.13	3472.35	2119.88	1381.69	1913.8	2874.45	0.690862	0.27243
actc1c	LL0000000223	ENSDARG00000079111	415164	75.2654	135.248	138.656	69.9715	93.2365	240.597	0.847325	-0.209817
actl6a	LL0000000224	ENSDARG00000070828	192313	498.511	708.582	619.07	569.627	627.138	966.301	0.691799	-0.244282
actl6b	LL0000000225	ENSDARG00000034107	553775	5.86483	3.92023	0	15.7682	11.7772	44.9897	0.0549588	-2.89035
actn1	LL0000000226	ENSDARG00000007219	560400	2453.46	3296.92	2603.22	467.134	1023.64	888.058	1.10472e-05	1.81213
actn2a	LL0000000227		100538165	56.6934	36.2621	38.0816	33.5075	21.5916	28.3631	0.49848	0.650849
actn2b	LL0000000228	ENSDARG00000071090	641575	124.139	129.368	58.5871	384.35	138.383	148.662	0.108767	-1.10516
actn3a	LL0000000229	ENSDARG00000013755	58037	58.6483	117.607	60.54	68.0005	55.9419	94.8696	0.916864	0.113851
actn3b	LL0000000230	ENSDARG00000001431	323320	102.635	275.396	121.08	130.088	116.791	113.452	0.547975	0.470014
actn4	LL0000000231	ENSDARG00000099786	322221	976.495	1544.57	1007.7	796.295	555.493	696.363	0.0651787	0.784842
actr1	LL0000000232	ENSDARG00000011611	406681	1247.25	1759.2	1548.65	1056.47	1326.9	1728.19	0.813615	0.147788
actr10	LL0000000233	ENSDARG00000038432	393139	227.751	580.194	490.179	348.872	195.306	278.741	0.291922	0.657615
actr2a	LL0000000234	ENSDARG00000052438	406820	1036.12	1174.11	1041.87	762.788	944.142	1243.09	0.817731	0.140636
actr2b	LL0000000235	ENSDARG00000070076	554861	18.572	46.0627	30.27	44.3481	36.3132	28.3631	0.880943	-0.200086
actr3	LL0000000236	ENSDARG00000091138	406250	7.81978	27.4416	16.5997	23.6523	16.6844	12.7145	0.985869	-0.0326923
actr3b	LL0000000237	ENSDARG00000008790	100038776	68.4231	39.2023	17.5761	47.3047	48.0904	26.407	0.979026	0.0397699
actr5	LL0000000238	ENSDARG00000098235	406809	169.103	168.57	67.3751	69.9715	77.5335	60.6383	0.146181	0.960509
actr6	LL0000000239	ENSDARG00000021370	324822	129.026	227.373	261.689	136.986	173.714	242.553	0.851884	0.159828
actr8	LL0000000240	ENSDARG00000103610	326866	129.026	212.673	110.339	139.943	149.178	173.113	0.972569	-0.0322363
acvr1ba	LL0000000241	ENSDARG00000018968	30183	324.521	655.659	552.671	1648.76	1210.11	1542.36	0.000186235	-1.5217
acvr1bb	LL0000000242	ENSDARG00000052142	559222	4.88736	7.84046	30.27	41.3916	31.406	17.6047	0.434506	-1.07186
ACVR1C	LL0000000243	ENSDARG00000086172	100331105	15.6396	3.92023	26.3642	60.1164	57.9048	18.5827	0.160841	-1.57242
acvr1l	LL0000000244	ENSDARG00000014986	30615	942.283	1241.73	929.582	935.253	761.595	889.036	0.596676	0.267923
acvr2aa	LL0000000245	ENSDARG00000011188	553359	1312.75	1524.97	1318.21	1545.29	1465.29	1523.78	0.812229	-0.125729
acvr2ab	LL0000000246	ENSDARG00000104700	100331014	1095.75	1351.5	1407.07	1073.22	1420.14	862.629	0.734433	0.199738
acvr2ba	LL0000000247	ENSDARG00000044422	30457	744.834	699.761	736.244	748.005	934.328	761.891	0.762437	-0.164492
acvr2bb	LL0000000248	ENSDARG00000103108	100331938	460.389	780.126	633.717	826.846	503.477	511.514	0.975458	0.025167
acvrl1	LL0000000249	ENSDARG00000018179	266753	1022.44	1272.12	775.302	171.479	296.394	310.038	1.83102e-06	1.98045
acy1	LL0000000250	ENSDARG00000111129	393970	177.9	250.895	227.513	191.19	188.436	265.048	0.975047	0.0257656
acy3.1	LL0000000251	ENSDARG00000093003	791456	63.5357	39.2023	54.6813	14.7827	60.8491	71.3967	0.946861	0.0983928
acy3.2	LL0000000252	ENSDARG00000005525	436619	408.583	209.732	265.595	161.624	293.45	272.872	0.706238	0.280048
acyp1	LL0000000253	ENSDARG00000060126	571263	282.49	182.291	114.245	130.088	99.1251	178.003	0.488107	0.507799
acyp2	LL0000000254	ENSDARG00000086271	101886626	23.4593	0.980058	24.4113	21.6813	56.9233	9.78037	0.631324	-0.855275
ada	LL0000000255	ENSDARG00000003113	436919	40.0764	232.274	111.315	105.45	105.995	206.366	0.924338	-0.123072
ada2a	LL0000000256	ENSDARG00000051746	373884	231.661	408.684	278.289	233.567	190.399	172.135	0.237428	0.623949
ada2b	LL0000000257	ENSDARG00000015623	559295	4.88736	3.92023	1.9529	20.6958	38.276	24.4509	0.00911143	-2.95485
adad1	LL0000000258	ENSDARG00000089181	564818	0	0.980058	12.6939	24.6378	20.6102	14.6706	0.243316	-2.13118
adad2	LL0000000259	ENSDARG00000105626	558824	6.84231	0.980058	0	6.8986	10.7958	3.91215	1	-1.46568
adal	LL0000000260	ENSDARG00000012986	619263	64.5132	66.6439	55.6577	47.3047	46.1275	73.3528	0.873548	0.163521
adam10a	LL0000000261	ENSDARG00000053468	566044	2254.05	3419.42	2812.18	1249.63	1645.87	1707.65	0.0192063	0.882396
adam10b	LL0000000262	ENSDARG00000015502	393392	56.6934	19.6012	28.3171	43.3626	34.3503	15.6486	0.913092	0.164329
adam11	LL0000000263	ENSDARG00000079204	567145	33.2341	25.4815	36.1287	293.683	246.341	758.957	1.03867e-10	-3.77565
adam12	LL0000000264	ENSDARG00000079068	563275	304.971	441.026	277.312	144.871	203.157	154.53	0.0231512	1.02586
ADAM12_1_of_many	LL0000000265	ENSDARG00000116062	101884222	33.2341	34.302	22.4584	24.6378	24.5359	14.6706	0.681777	0.495364
adam15	LL0000000266	ENSDARG00000089213	795199	390.011	587.055	503.849	449.394	469.127	425.446	0.821944	0.139987
adam17a	LL0000000267	ENSDARG00000043213	324142	444.75	881.072	560.483	435.597	472.071	622.032	0.635375	0.302292
adam17b	LL0000000268	ENSDARG00000093093	560657	850.401	1349.54	1048.71	489.8	388.649	380.457	0.000229285	1.36768
adam19a	LL0000000269	ENSDARG00000059693	565342	1367.48	1187.83	679.61	220.755	369.02	331.555	2.91533e-05	1.81192
adam19b	LL0000000270	ENSDARG00000067545	571252	116.319	203.852	129.868	174.436	124.643	182.893	0.909616	-0.0989284
adam22	LL0000000271	ENSDARG00000060532	100126805	232.638	195.032	178.691	2392.83	938.254	2929.22	6.43668e-12	-3.36799
adam23a	LL0000000272	ENSDARG00000062323	794175	87.9725	43.1226	67.3751	1057.46	613.398	1571.71	2.94593e-15	-4.03009
adam28	LL0000000273	ENSDARG00000035514	767749	89.9275	128.388	60.54	123.189	224.749	122.255	0.265439	-0.753784
adam8a	LL0000000274	ENSDARG00000001452	368917	1909.98	1447.55	1128.78	210.9	188.436	61.6164	3.54086e-10	3.28292
adam8b	LL0000000275	ENSDARG00000057644	100005593	88.95	185.231	117.174	77.8556	86.3665	18.5827	0.178357	1.09827
adam9	LL0000000276	ENSDARG00000010070	447940	143.688	126.427	105.457	85.7397	73.6078	37.1654	0.143492	0.93459
adamts1	LL0000000277	ENSDARG00000103519	565145	1590.35	3698.74	1750.78	456.293	614.38	238.641	2.13991e-06	2.42675
adamts10	LL0000000278	ENSDARG00000075188	564734	1101.61	2182.59	1275.25	192.175	321.911	250.378	1.86271e-09	2.57632
adamts12	LL0000000279	ENSDARG00000067549	100003937	814.234	1235.85	796.784	152.755	190.399	121.277	4.52879e-11	2.61586
adamts13	LL0000000280	ENSDARG00000076270	100320289	9.77472	6.86041	9.76451	16.7537	13.7401	20.5388	0.510038	-0.950876
adamts14	LL0000000281	ENSDARG00000078494	101886422	36.1665	57.8234	28.3171	35.4785	50.0533	24.4509	0.906235	0.153218
adamts15a	LL0000000282	ENSDARG00000029124	569571	1157.33	2345.28	1057.5	510.496	668.359	670.934	0.00407501	1.30169
adamts15b	LL0000000283	ENSDARG00000058252	100002059	1097.7	5097.28	2079.84	508.525	626.157	1711.57	0.0276328	1.53966
adamts16	LL0000000284	ENSDARG00000074646	568792	120.229	251.875	150.374	97.5659	77.5335	155.508	0.3396	0.660173
adamts17	LL0000000285	ENSDARG00000075555	101884120	22.4819	18.6211	28.3171	14.7827	17.6659	22.4949	0.811355	0.337338
adamts18	LL0000000286	ENSDARG00000001999	100150128	138.801	266.576	219.702	426.728	456.368	315.906	0.0495069	-0.939727
adamts2	LL0000000287	ENSDARG00000075930	571682	199.404	506.69	290.006	125.16	181.566	86.0673	0.0176842	1.34253
adamts3	LL0000000288	ENSDARG00000060127	102467218	2042.92	1872.89	1756.64	200.059	158.011	107.584	3.6776e-21	3.60672
adamts5	LL0000000289	ENSDARG00000100307	565053	273.692	352.821	360.311	165.566	171.751	126.167	0.00919274	1.0903
adamts6	LL0000000290	ENSDARG00000041982	569099	31.2791	49.0029	42.9639	19.7103	47.109	18.5827	0.644194	0.529177
ADAMTS7	LL0000000291	ENSDARG00000102478	560364	72.333	80.3648	73.2339	36.464	51.0347	27.385	0.158833	0.975756
adamts8a	LL0000000292	ENSDARG00000007709	569618	182.787	235.214	207.984	135.015	164.881	59.6603	0.201741	0.799966
adamts9	LL0000000293	ENSDARG00000077778	100333407	773.181	1289.76	1010.63	301.567	380.798	285.587	1.06677e-05	1.6669
adamtsl2	LL0000000294	ENSDARG00000074033	100537087	404.674	479.248	808.502	385.336	922.551	80.1991	0.813615	0.286006
adamtsl3	LL0000000295	ENSDARG00000027903	100534944	260.008	297.938	317.347	105.45	167.826	74.3308	0.0065002	1.33234
adamtsl5	LL0000000296	ENSDARG00000052118	101886605	34.2115	196.992	114.245	44.3481	72.6263	143.771	0.733924	0.405717
adamtsl7	LL0000000297	ENSDARG00000055439	556634	118.274	57.8234	86.9042	32.522	41.2204	22.4949	0.0316583	1.45051
adap2	LL0000000298	ENSDARG00000070565	100331455	27.3692	15.6809	16.5997	43.3626	83.4221	71.3967	0.0184553	-1.73225
adar	LL0000000299	ENSDARG00000012389	58119	326.476	426.325	329.064	489.8	352.336	480.216	0.606628	-0.289594
adarb1a	LL0000000300	ENSDARG00000041609	58134	126.094	116.627	148.421	285.799	305.227	425.446	0.000927975	-1.37782
adarb1b	LL0000000301	ENSDARG00000003544	558759	38.1214	15.6809	24.4113	47.3047	27.4802	29.3411	0.74039	-0.412691
adarb2	LL0000000302	ENSDARG00000071823	558149	13.6846	19.6012	18.5526	51.2467	24.5359	11.7364	0.568742	-0.755392
adat1	LL0000000303	ENSDARG00000061348	792614	81.1302	104.866	86.9042	100.522	90.2922	87.0453	0.978059	-0.0259774
adat2	LL0000000304	ENSDARG00000041944	100034610	64.5132	68.6041	64.4458	74.8991	93.2365	84.1112	0.644829	-0.352549
adat3	LL0000000305	ENSDARG00000005640	368634	42.0313	60.7636	30.27	32.522	40.2389	75.3089	0.902829	-0.154327
adck1	LL0000000306	ENSDARG00000062561	100144553	17.5945	33.322	29.2935	37.4495	33.3689	16.6266	0.935153	-0.12449
adck2	LL0000000307	ENSDARG00000073923	572087	22.4819	15.6809	37.1052	71.9425	51.0347	26.407	0.31044	-0.988718
adck5	LL0000000308	ENSDARG00000075405	100001584	113.387	108.786	122.056	97.5659	207.083	147.684	0.583765	-0.394041
adcy1a	LL0000000309	ENSDARG00000069026	557026	23.4593	6.86041	13.6703	44.3481	20.6102	36.1874	0.282612	-1.20105
adcy1b	LL0000000310	ENSDARG00000088634	569499	49.8511	63.7038	82.9984	492.757	237.508	109.54	0.0010476	-2.09507
adcy2a	LL0000000311	ENSDARG00000058392	563724	24.4368	46.0627	46.8697	54.2033	27.4802	35.2093	0.997504	0.0059476
adcy2b	LL0000000312	ENSDARG00000014588	557902	89.9275	75.4645	82.9984	147.827	109.921	205.388	0.108119	-0.898849
adcy3a	LL0000000313	ENSDARG00000077145	571825	267.827	140.148	213.843	142.9	156.048	196.586	0.636342	0.327499
adcy3b	LL0000000314	ENSDARG00000017437	564719	12.7071	0	4.88226	23.6523	6.87006	14.6706	0.510452	-1.36114
adcy5	LL0000000315	ENSDARG00000091342	562619	539.565	464.548	413.039	251.306	200.213	293.411	0.0227995	0.927801
adcy6a	LL0000000316	ENSDARG00000061445	570652	414.448	224.433	234.348	170.494	132.494	155.508	0.0649763	0.929471
adcy6b	LL0000000317	ENSDARG00000027797	560807	229.706	253.835	250.948	150.784	222.786	205.388	0.554303	0.343249
adcy7	LL0000000318	ENSDARG00000060070	568726	725.285	875.192	671.799	364.64	359.206	386.325	0.00320137	1.03335
adcy8	LL0000000319	ENSDARG00000031783	100148976	24.4368	4.90029	3.90581	144.871	44.1647	158.442	0.000201835	-3.38572
adcy9	LL0000000320	ENSDARG00000100869	100333702	630.47	1090.8	835.842	261.161	283.635	301.236	2.57802e-05	1.59572
adcyap1a	LL0000000321	ENSDARG00000004015	259257	20.5269	4.90029	26.3642	38.435	34.3503	132.035	0.0477417	-1.98351
adcyap1b	LL0000000322	ENSDARG00000027740	335625	265.872	122.507	81.0455	929.34	656.581	2198.63	1.02191e-06	-3.01116
adcyap1r1a	LL0000039757	ENSDARG00000105201	541315	64.5132	10.7806	50.7755	709.57	351.354	1440.65	3.14776e-09	-4.31046
adcyap1r1b	LL0000039758	ENSDARG00000053724	555473	13.6846	72.5243	35.1523	358.727	158.993	456.743	1.3108e-05	-3.00541
add1	LL0000000324	ENSDARG00000103962	555511	1661.7	2553.05	1894.32	913.571	1186.56	907.619	0.00606378	1.02227
add2	LL0000000325	ENSDARG00000074581	570147	85.0401	48.0228	28.3171	486.844	180.584	446.963	3.54528e-06	-2.78773
add3a	LL0000000326	ENSDARG00000040874	556762	6438.61	7164.22	6398.69	1694.1	2962.96	2497.91	2.80622e-05	1.48309
add3b	LL0000000327	ENSDARG00000056250	553243	511.218	334.2	437.45	77.8556	105.995	202.454	0.000588462	1.73147
adgb	LL0000000328	ENSDARG00000005595	555435	31.2791	12.7408	5.85871	119.247	62.812	101.716	0.00149129	-2.50824
adgra1a	LL0000000329	ENSDARG00000054177	101884141	66.4681	13.7208	31.2464	222.726	131.513	184.849	0.000691791	-2.27422
adgra2	LL0000000330	ENSDARG00000076994	560700	3165.06	8058.04	5555.03	1204.3	1124.73	554.547	1.53974e-07	2.54066
adgra3	LL0000000331	ENSDARG00000073673	100003592	1883.59	1447.55	1214.71	355.771	557.456	451.853	3.74258e-06	1.73555
adgrb1a	LL0000000332	ENSDARG00000075133	563527	131.959	85.265	122.056	669.164	257.137	734.506	8.86024e-06	-2.29131
adgrb1b	LL0000000333	ENSDARG00000078529	100302472	59.6258	21.5613	46.8697	472.061	342.522	844.046	5.29756e-11	-3.69506
adgrb2	LL0000000334	ENSDARG00000025667	556993	45.9412	45.0827	14.6468	287.77	92.2551	55.7481	0.0138783	-2.04399
adgrb3	LL0000000335	ENSDARG00000059832	566117	76.2428	27.4416	37.1052	452.351	168.807	674.846	7.35333e-07	-3.20242
adgrd1	LL0000000336	ENSDARG00000053344	791731	117.297	104.866	124.009	69.9715	72.6263	58.6822	0.167751	0.782332
adgrd2	LL0000000337	ENSDARG00000103067	571770	53.761	10.7806	10.741	111.363	87.3479	122.255	0.0107625	-2.09198
adgre10	LL0000000338	ENSDARG00000075855	569655	362.642	192.091	400.345	90.6673	292.468	417.622	0.802974	0.254222
adgre13	LL0000000339		100538238	0.977472	3.92023	3.90581	6.8986	13.7401	6.84626	1	-1.64256
adgre14	LL0000000340	ENSDARG00000056062	108182849	3.90989	1.96012	10.741	11.8262	3.92575	1.95607	1	-0.0917147
adgre15	LL0000000341	ENSDARG00000096588	100536619	0	7.84046	2.92935	13.7972	10.7958	3.91215	1	-1.40436
adgre16	LL0000000342	ENSDARG00000096622	110437794	0	1.96012	10.741	5.91308	4.90719	6.84626	1	-0.475902
adgre17	LL0000000343	ENSDARG00000095297	110439897	8.79725	1.96012	12.6939	14.7827	14.7216	14.6706	0.601934	-0.913347
adgre19	LL0000000344	ENSDARG00000096649		0	0	3.90581	0	0	5.86822	1	-0.587428
adgre5a	LL0000000345	ENSDARG00000026313		0	0	7.81161	8.86963	1.96287	0	1	-0.47115
adgre5b.2	LL0000000346	ENSDARG00000104083	101882660	21.5044	51.9431	15.6232	28.5799	11.7772	7.8243	0.518179	0.886684
adgre5b.3	LL0000000347	ENSDARG00000112943	792970	390.989	578.234	553.648	226.668	370.983	208.322	0.0504642	0.91799
adgre8	LL0000000349	ENSDARG00000079050		20.5269	4.90029	0.976451	2.95654	1.96287	0	1	2.42505
adgre9	LL0000000350	ENSDARG00000096577	101883848	19.5494	12.7408	14.6468	32.522	16.6844	22.4949	0.644067	-0.611153
adgrf11	LL0000000351	ENSDARG00000075134	100537132	2.93242	6.86041	8.78806	4.92757	3.92575	0	1	1.07007
adgrf3a	LL0000000352	ENSDARG00000087870	101886922	8.79725	0	5.85871	28.5799	30.4245	30.3192	0.0423591	-2.6072
adgrf3b	LL0000000353	ENSDARG00000093008	565465	51.806	72.5243	48.8226	114.32	38.276	49.8799	0.844383	-0.225613
adgrf6	LL0000000354	ENSDARG00000091757	565101	80.1527	81.3448	128.892	112.349	106.977	135.947	0.706238	-0.290931
adgrf7	LL0000000355	ENSDARG00000086445	613165	19.5494	0	11.7174	16.7537	10.7958	1.95607	0.978528	0.083956
adgrf8	LL0000000356	ENSDARG00000093316	100537224	27.3692	4.90029	11.7174	47.3047	72.6263	90.9575	0.00845955	-2.26125
adgrg1	LL0000000357	ENSDARG00000105643	324948	211.134	245.015	249.972	464.177	470.108	558.459	0.00325637	-1.07999
adgrg11	LL0000000358	ENSDARG00000041413	563883	8.79725	22.5413	28.3171	37.4495	30.4245	85.0893	0.166443	-1.35854
adgrg2a	LL0000000359	ENSDARG00000088137	101882832	45.9412	81.3448	112.292	56.1743	93.2365	164.31	0.693156	-0.389061
adgrg3	LL0000000360	ENSDARG00000074782	799479	16.617	4.90029	14.6468	68.0005	233.582	78.243	2.24411e-05	-3.39251
adgrg4a	LL0000000361	ENSDARG00000105416	793963	14.6621	0	18.5526	21.6813	8.83293	14.6706	0.853107	-0.443807
adgrg4b	LL0000000362	ENSDARG00000094386	100331278	25.4143	15.6809	19.529	31.5364	14.7216	14.6706	0.997504	-0.00700516
adgrg6	LL0000000363	ENSDARG00000054137	561970	2193.45	4189.75	2512.41	738.15	996.159	634.746	2.73639e-06	1.90878
adgrg7.1	LL0000000364	ENSDARG00000071088	101882620	7.81978	1.96012	11.7174	13.7972	14.7216	5.86822	0.746093	-0.677391
adgrg7.2	LL0000000365	ENSDARG00000071085		6.84231	0	5.85871	6.8986	0	0	1	0.88128
adgrl1.1	LL0000000366		100334775	6.84231	16.661	10.741	24.6378	17.6659	6.84626	0.768769	-0.521212
adgrl1a	LL0000000367	ENSDARG00000089292	562531	52.7835	46.0627	56.6342	252.292	145.253	133.013	0.0006592	-1.7707
adgrl2a	LL0000000368	ENSDARG00000069356	57987	3037.01	4249.53	3000.64	1740.42	1704.76	1571.71	0.00238913	1.03598
adgrl2b.1	LL0000000369	ENSDARG00000111712	110437953	3.90989	0	16.5997	0	0	1.95607	1	3.38852
ADGRL3	LL0000000370	ENSDARG00000090624		339.183	301.858	290.006	441.51	388.649	494.887	0.249948	-0.509123
adgrl3.1	LL0000000371	ENSDARG00000061121	560631	703.78	994.759	758.703	867.252	432.814	433.271	0.381733	0.503509
adgrl4	LL0000000372	ENSDARG00000013653	406676	109.477	101.926	44.9168	21.6813	18.6473	43.0336	0.0311186	1.62027
adgrv1	LL0000000373	ENSDARG00000021137	415105	310.836	218.553	163.067	869.223	834.221	702.231	6.56647e-06	-1.79664
adh5	LL0000000374	ENSDARG00000080010	116517	3426.04	2662.82	2869.79	1224.01	2203.33	1870.01	0.0694693	0.758008
adh8a	LL0000000375	ENSDARG00000091211	322482	49.8511	33.322	47.8461	15.7682	23.5545	33.2533	0.367389	0.852053
adh8b	LL0000000376	ENSDARG00000024278	402841	461.367	502.77	491.155	133.044	193.343	323.73	0.015503	1.16247
adhfe1	LL0000000377	ENSDARG00000053518	404618	145.643	257.755	211.89	89.6818	95.1994	65.5285	0.00928517	1.29701
adi1	LL0000000378	ENSDARG00000020448	324079	747.766	775.226	694.257	297.625	406.315	581.932	0.0801107	0.785989
adipoqa	LL0000000379	ENSDARG00000062228	562602	0.977472	7.84046	3.90581	6.8986	0.981437	0	1	0.691849
adipoqb	LL0000000380	ENSDARG00000100086	751715	2.93242	4.90029	11.7174	20.6958	7.8515	7.8243	0.648654	-0.895317
adipor1a	LL0000000381	ENSDARG00000002912	436740	870.928	1513.21	821.196	962.847	600.639	709.077	0.368357	0.496157
adipor1b	LL0000000382	ENSDARG00000042717	406821	212.112	241.094	192.361	291.712	219.842	366.764	0.423901	-0.444203
adipor2	LL0000000383	ENSDARG00000101849	560140	5409.33	3467.45	3428.32	1330.44	2029.61	1285.14	0.000340491	1.40545
adka	LL0000000384	ENSDARG00000039429	368220	240.458	500.81	561.46	353.8	537.828	416.644	0.995084	-0.00613254
adkb	LL0000000385	ENSDARG00000095947	322229	66.4681	272.456	250.948	117.276	97.1623	71.3967	0.152135	1.04526
adm2a	LL0000000386	ENSDARG00000045708	403114	863.108	192.091	338.829	159.653	249.285	47.9238	0.0377378	1.60947
adm2b	LL0000000387	ENSDARG00000078875	100322075	7.81978	1.96012	9.76451	14.7827	4.90719	0	1	-0.0101962
adma	LL0000000388	ENSDARG00000015263	556502	782.955	896.753	476.508	58.1453	95.1994	133.013	9.3083e-10	2.91249
admb	LL0000000389	ENSDARG00000069027	570100	1158.3	1678.84	616.141	91.6528	171.751	190.717	8.11921e-09	2.92676
admp	LL0000000390	ENSDARG00000025372	140619	16.617	0.980058	14.6468	19.7103	17.6659	0	0.945113	-0.212826
adnp2a	LL0000000391	ENSDARG00000060937	100007394	267.827	251.875	234.348	209.914	188.436	238.641	0.681306	0.243372
adnp2b	LL0000000392	ENSDARG00000028431	564171	955.968	1462.25	1138.54	799.252	1010.88	834.266	0.359413	0.427618
adnpa	LL0000000393	ENSDARG00000062002	564637	471.142	967.317	756.75	870.209	905.866	1121.81	0.475654	-0.400653
adnpb	LL0000000394	ENSDARG00000074293	100330315	416.403	426.325	349.57	576.526	457.35	674.846	0.253746	-0.519184
adoa	LL0000000395	ENSDARG00000042827	494091	234.593	418.485	381.792	239.48	181.566	166.266	0.0992246	0.81728
adob	LL0000000396	ENSDARG00000053571	406474	265.872	313.619	302.7	147.827	163.9	113.452	0.0128697	1.05305
adora1a	LL0000000397	ENSDARG00000070056	100007535	8.79725	13.7208	12.6939	36.464	31.406	20.5388	0.20422	-1.32807
adora1b	LL0000000398	ENSDARG00000075694	100150997	28.3467	42.1425	93.7393	173.45	75.5707	253.312	0.0281586	-1.61291
adora2aa	LL0000000399	ENSDARG00000033706	561701	541.52	268.536	346.64	79.8266	52.9976	60.6383	3.85672e-08	2.57996
adora2ab	LL0000000400	ENSDARG00000058488	566118	234.593	167.59	188.455	81.7977	82.4407	121.277	0.0334218	1.04865
adora2b	LL0000000401	ENSDARG00000002533	560100	907.094	519.431	561.46	276.929	223.768	283.631	0.00111619	1.34178
adpgk	LL0000000402	ENSDARG00000063525	557919	85.0401	310.678	250.948	230.61	156.048	132.035	0.730464	0.318161
adpgk2	LL0000000403	ENSDARG00000062785	566398	103.612	71.5442	89.8335	68.986	66.7377	35.2093	0.40328	0.632629
adprh	LL0000000404	ENSDARG00000040712	445059	245.346	289.117	202.125	58.1453	60.8491	100.738	0.000228195	1.74499
adprhl1	LL0000000405	ENSDARG00000041589	450012	49.8511	16.661	30.27	45.3336	33.3689	38.1435	0.831011	-0.271702
adprhl2	LL0000000406	ENSDARG00000019338	796446	152.486	149.949	136.703	251.306	230.638	301.236	0.0561723	-0.834689
adprm	LL0000000407	ENSDARG00000026090	393393	66.4681	9.80058	26.3642	37.4495	33.3689	27.385	0.970645	0.0637486
adra1aa	LL0000000408	ENSDARG00000028725	798498	197.449	50.963	123.033	88.6963	56.9233	63.5724	0.301888	0.828397
adra1ab	LL0000000409	ENSDARG00000027638	557259	42.0313	22.5413	23.4348	123.189	134.457	243.531	1.74096e-05	-2.50963
adra1ba	LL0000000410	ENSDARG00000011317	100149100	67.4456	157.789	123.033	66.0294	34.3503	52.814	0.0757658	1.18487
adra1bb	LL0000000411	ENSDARG00000041173	492486	131.959	39.2023	41.9874	61.1019	50.0533	72.3748	0.859891	0.215845
adra1d	LL0000000412	ENSDARG00000024101	568614	739.947	593.915	519.472	102.493	124.643	187.783	1.95849e-07	2.15914
adra2a	LL0000000413	ENSDARG00000040841	266750	105.567	68.6041	91.7864	44.3481	65.7563	77.265	0.513782	0.505237
adra2b	LL0000000414	ENSDARG00000102096	266751	257.075	433.186	245.089	107.421	112.865	71.3967	0.00038818	1.68114
adra2c	LL0000000415	ENSDARG00000069669	266752	39.0989	12.7408	40.0345	50.2612	37.2946	107.584	0.256534	-1.08676
adra2da	LL0000000416	ENSDARG00000091277	266754	85.0401	166.61	112.292	46.3192	48.0904	48.9019	0.0189298	1.34451
adra2db	LL0000000417	ENSDARG00000054667	266755	10.7522	3.92023	11.7174	19.7103	7.8515	7.8243	0.839665	-0.422859
adrb1	LL0000000418	ENSDARG00000007490	557194	76.2428	188.171	117.174	68.986	51.0347	60.6383	0.090703	1.07874
adrb2a	LL0000000419	ENSDARG00000088124	565838	106.544	166.61	139.633	82.7832	79.4964	120.299	0.398863	0.546674
adrb2b	LL0000000420	ENSDARG00000054510	100037315	4.88736	16.661	29.2935	34.493	27.4802	11.7364	0.742151	-0.535664
adrb3a	LL0000000421	ENSDARG00000053646	558248	594.303	664.479	704.021	165.566	193.343	284.609	3.78213e-05	1.60881
adrb3b	LL0000000422	ENSDARG00000052919	792519	9.77472	10.7806	23.4348	24.6378	34.3503	13.6925	0.602696	-0.724229
adrm1	LL0000000423	ENSDARG00000058560	796450	758.519	803.648	950.087	475.018	704.672	926.201	0.678077	0.254534
adsl	LL0000000424	ENSDARG00000017049	334431	238.503	286.177	233.372	124.175	272.84	223.971	0.687532	0.287692
adss	LL0000000425	ENSDARG00000002071	550502	174.968	250.895	287.077	176.407	194.325	331.555	0.981027	0.0216778
adssl	LL0000000426	ENSDARG00000012399	192305	623.627	1022.2	1156.12	621.859	1200.3	1245.04	0.870258	-0.130502
adssl1	LL0000000427	ENSDARG00000099517	407989	34.2115	40.1824	29.2935	40.4061	30.4245	31.2972	0.986446	0.0218939
adtrp1	LL0000000428	ENSDARG00000037810	550414	132.936	197.972	228.49	135.015	240.452	183.871	0.999811	0.000130383
aebp1	LL0000000429	ENSDARG00000091726	793308	613.853	857.551	879.783	229.625	430.851	172.135	0.00166529	1.49768
aebp2	LL0000000430	ENSDARG00000006038	406815	480.916	533.152	330.041	470.09	378.835	534.986	0.956963	-0.0421174
aep1	LL0000000431	ENSDARG00000039099	503710	223.841	351.841	325.158	44.3481	18.6473	58.6822	1.25363e-07	2.88812
aes	LL0000000432	ENSDARG00000021805	393395	146.621	90.1653	186.502	108.407	154.086	122.255	0.87847	0.137752
afap1	LL0000000433	ENSDARG00000055284	568356	778.068	1821.93	909.076	630.729	423.981	291.455	0.00726335	1.38225
afap1l1a	LL0000000434	ENSDARG00000089162	566757	497.533	763.465	495.061	115.305	146.234	215.168	1.56208e-05	1.88109
afap1l1b	LL0000000435	ENSDARG00000056453	768144	202.337	253.835	136.703	60.1164	93.2365	74.3308	0.00701846	1.38064
afap1l2	LL0000000436	ENSDARG00000074806	567369	1517.04	1194.69	1067.26	190.204	241.434	238.641	1.09805e-12	2.49514
afdna	LL0000000437	ENSDARG00000029472	558359	1011.68	863.431	811.431	582.439	702.709	507.601	0.154858	0.583584
aff1	LL0000000438		100537394	0	0	0	26.6089	0	0	1	-5.62348
aff2	LL0000000439	ENSDARG00000052242	100330019	807.392	1149.61	787.996	893.861	589.844	880.234	0.722805	0.215608
aff3	LL0000000440	ENSDARG00000079575	570215	668.591	578.234	740.15	150.784	121.698	82.1551	5.46877e-10	2.48626
aff4	LL0000000441	ENSDARG00000001857	556421	2327.36	2113.99	1838.66	1338.33	1380.88	1063.13	0.0427559	0.731493
afg1la	LL0000000442	ENSDARG00000011466	561238	62.5582	80.3648	63.4693	92.6383	89.3108	112.474	0.449586	-0.512557
afg1lb	LL0000000443	ENSDARG00000042902	555926	108.499	147.009	125.962	81.7977	122.68	126.167	0.794713	0.206222
afg3l2	LL0000000444	ENSDARG00000062272	569168	283.467	424.365	301.723	251.306	339.577	326.664	0.842834	0.137834
afmid	LL0000000445	ENSDARG00000099106	550372	82.1077	110.747	121.08	136.986	156.048	191.695	0.273382	-0.626753
afp4	LL0000000446	ENSDARG00000095863	568707	30.3016	6.86041	32.2229	34.493	46.1275	277.763	0.0208529	-2.36877
aftpha	LL0000000447	ENSDARG00000069249	556043	273.692	381.243	253.877	432.641	355.28	483.15	0.33866	-0.484012
aftphb	LL0000000448	ENSDARG00000071347	100004990	17.5945	25.4815	16.5997	45.3336	16.6844	0	0.982602	-0.055345
aga	LL0000000449	ENSDARG00000004889	566517	299.107	312.639	336.876	165.566	268.914	304.17	0.54897	0.360898
agap1	LL0000000450	ENSDARG00000062123	100148154	1111.39	1563.19	1325.04	1097.86	646.767	716.901	0.11382	0.70032
agap2	LL0000000451	ENSDARG00000099874	565109	27.3692	15.6809	27.3406	163.595	125.624	475.326	3.1411e-07	-3.4411
agap3	LL0000000452	ENSDARG00000087822	324332	692.05	690.941	576.106	713.512	597.695	796.122	0.864403	-0.105234
AGBL1	LL0000000453	ENSDARG00000104384	100536841	30.3016	16.661	23.4348	42.3771	26.4988	40.0995	0.557463	-0.630339
agbl2	LL0000000454	ENSDARG00000079983	568152	20.5269	9.80058	15.6232	19.7103	18.6473	24.4509	0.758197	-0.450847
agbl4	LL0000000455	ENSDARG00000110838	550450	0.977472	6.86041	0	36.464	21.5916	32.2752	0.00989399	-3.52761
agbl5	LL0000000456	ENSDARG00000045900	445479	206.247	235.214	193.337	167.537	128.568	147.684	0.322633	0.516433
agfg1a	LL0000000457	ENSDARG00000030020	327597	659.794	774.246	776.279	353.8	437.721	330.577	0.00711481	0.97806
agfg1b	LL0000000458	ENSDARG00000019526	393560	688.141	605.676	500.92	294.669	370.983	552.591	0.276795	0.558937
aggf1	LL0000000459	ENSDARG00000060109	559905	317.679	233.254	216.772	230.61	289.524	262.114	0.972569	-0.027084
agk	LL0000000460	ENSDARG00000009837	334270	107.522	138.188	123.033	133.044	148.197	151.596	0.739331	-0.231238
agla	LL0000000461	ENSDARG00000103811	567798	372.417	587.055	486.273	355.771	349.392	482.172	0.630308	0.284062
aglb	LL0000000462	ENSDARG00000100352	553352	5.86483	6.86041	13.6703	34.493	20.6102	5.86822	0.429126	-1.20755
agmat	LL0000000463	ENSDARG00000059700	556522	9.77472	6.86041	11.7174	14.7827	8.83293	11.7364	0.873514	-0.318174
agmo	LL0000000464	ENSDARG00000025595	405819	732.127	759.545	767.491	211.886	416.129	484.129	0.0262411	1.02241
ago1	LL0000000465	ENSDARG00000092644	570775	390.011	486.109	286.1	470.09	292.468	337.423	0.919309	0.0794131
ago2	LL0000000466	ENSDARG00000061268	570630	1128.98	1479.89	1479.32	922.441	1145.34	762.869	0.224073	0.530335
ago3a	LL0000000467	ENSDARG00000059888	567622	192.562	148.969	245.089	175.421	195.306	80.1991	0.625033	0.379602
ago3b	LL0000000468	ENSDARG00000063079	568159	452.57	870.292	447.215	352.814	298.357	116.386	0.0396787	1.2055
ago4	LL0000000469	ENSDARG00000100854	100535764	737.014	907.534	934.464	1399.43	1323.96	1090.51	0.154278	-0.564443
agpat2	LL0000000470	ENSDARG00000101139	777624	790.775	849.71	924.699	360.698	513.292	600.515	0.0503792	0.798809
agpat3	LL0000000471	ENSDARG00000036549	406734	2603.99	2111.04	2158.93	2546.57	1766.59	1566.82	0.687791	0.225341
agpat4	LL0000000472	ENSDARG00000069044	406265	204.292	208.752	135.727	204.001	240.452	300.257	0.452811	-0.440522
agpat5	LL0000000473	ENSDARG00000063187	767778	284.444	489.049	388.628	227.654	269.895	357.962	0.441068	0.441864
agpat9l	LL0000000474	ENSDARG00000006491	567414	67.4456	74.4844	51.7519	16.7537	11.7772	54.7701	0.195914	1.21701
agps	LL0000000475	ENSDARG00000042821	386801	384.147	563.533	466.744	370.553	358.225	541.833	0.817082	0.154666
agr1	LL0000000476	ENSDARG00000060682	335309	158.351	57.8234	141.585	47.3047	115.81	260.158	0.843506	-0.242644
agr2	LL0000000477	ENSDARG00000070480	335616	144.666	334.2	173.808	964.818	1238.57	1369.25	3.29495e-08	-2.45259
agrn	LL0000000478	ENSDARG00000079388	565373	2232.55	3193.03	2358.13	2322.86	2198.42	2836.31	0.8973	0.0812212
agrp	LL0000000479	ENSDARG00000069089	100149042	16.617	6.86041	5.85871	22.6668	53.979	115.408	0.00465909	-2.71083
agt	LL0000000480	ENSDARG00000016412	322485	47.8961	30.3818	34.1758	21.6813	30.4245	73.3528	0.910047	-0.158036
agtpbp1	LL0000000481	ENSDARG00000105214	554164	13.6846	9.80058	16.5997	33.5075	21.5916	20.5388	0.443683	-0.915872
agtr1a	LL0000000482	ENSDARG00000018616	794575	35.189	101.926	51.7519	19.7103	4.90719	1.95607	0.00613169	2.83006
agtr1b	LL0000000483	ENSDARG00000045443	100333455	76.2428	45.0827	56.6342	39.4206	27.4802	24.4509	0.22213	0.9622
agtr2	LL0000000484	ENSDARG00000035552	503772	1837.65	1973.84	1683.4	170.494	361.169	363.83	1.90887e-10	2.61729
agtrap	LL0000000485	ENSDARG00000077082	793937	31.2791	21.5613	34.1758	27.5944	48.0904	40.0995	0.712733	-0.412093
agxt2	LL0000000486	ENSDARG00000100709	619269	190.607	141.128	110.339	74.8991	86.3665	107.584	0.229927	0.717429
agxta	LL0000000487	ENSDARG00000052099	436603	22.4819	0	6.83516	11.8262	8.83293	51.836	0.510224	-1.30615
agxtb	LL0000000488	ENSDARG00000018478	79378	44.9637	10.7806	110.339	48.2902	80.4778	347.203	0.167051	-1.51895
ahctf1	LL0000000489	ENSDARG00000077530	553494	617.763	778.166	734.291	682.961	908.811	848.936	0.72029	-0.196307
ahcy	LL0000000490	ENSDARG00000005191	387530	2121.12	2887.25	3362.9	1490.1	3352.59	2107.67	0.686904	0.268357
ahcyl1	LL0000000491	ENSDARG00000056331	798918	2288.26	2450.15	2759.45	544.989	626.157	1211.79	9.28544e-05	1.65372
ahcyl2	LL0000000492	ENSDARG00000039343	394240	331.363	516.491	382.769	264.118	265.969	195.607	0.0959197	0.761968
ahdc1	LL0000000493	ENSDARG00000093453	100536210	192.562	444.946	355.428	287.77	275.784	293.411	0.775127	0.212454
ahi1	LL0000000494	ENSDARG00000044056	562701	613.853	673.3	762.609	510.496	594.751	410.776	0.350219	0.435176
ahnak	LL0000000495	ENSDARG00000061764	559276	9681.86	19020	12420.5	3486.75	5537.27	4679.91	8.1906e-05	1.58533
ahr1a	LL0000000496	ENSDARG00000020046	246224	7.81978	0.980058	13.6703	22.6668	6.87006	1.95607	0.854313	-0.486556
ahr1b	LL0000000497	ENSDARG00000023537	554265	72.333	80.3648	72.2574	329.162	185.492	72.3748	0.0410576	-1.38374
ahr2	LL0000000498	ENSDARG00000021833	30517	2361.57	3818.31	3150.03	1095.89	1515.34	1260.69	0.000496891	1.26881
ahrra	LL0000000499	ENSDARG00000099702	641291	26.3918	27.4416	19.529	40.4061	23.5545	20.5388	0.886205	-0.203785
ahrrb	LL0000000500	ENSDARG00000052618	565319	25.4143	4.90029	18.5526	39.4206	24.5359	4.89019	0.789591	-0.494245
ahsa1a	LL0000000501	ENSDARG00000028664	565968	1084.02	211.693	467.72	69.9715	216.898	65.5285	0.00122642	2.32311
ahsa1b	LL0000000502	ENSDARG00000100317	321945	3547.25	312.639	2778.98	187.248	1515.34	220.058	0.351303	1.78785
ahsg1	LL0000000503	ENSDARG00000026764	569558	69.4005	3.92023	12.6939	8.86963	3.92575	3.91215	0.116992	2.36444
ahsg2	LL0000000504	ENSDARG00000069293	567406	10.7522	0.980058	6.83516	3.94206	11.7772	9.78037	1	-0.457686
aicda	LL0000000505	ENSDARG00000015734	493784	9.77472	6.86041	7.81161	3.94206	6.87006	0	1	1.17734
aida	LL0000000506	ENSDARG00000014532	393763	219.931	391.043	305.629	155.711	151.141	200.498	0.0791158	0.853278
aif1l	LL0000000507	ENSDARG00000009336	321033	1848.4	1548.49	1568.18	882.035	895.071	1326.22	0.0930882	0.67799
aifm1	LL0000000508	ENSDARG00000058088	373125	462.344	592.935	462.838	555.83	728.226	606.383	0.534691	-0.316449
aifm2	LL0000000509	ENSDARG00000077549	557507	563.024	806.588	788.973	225.683	400.426	324.708	0.0046732	1.18282
aifm3	LL0000000510	ENSDARG00000062780	100150876	27.3692	0	4.88226	29.5654	31.406	20.5388	0.449736	-1.33748
aifm4	LL0000000511	ENSDARG00000061634	791218	131.959	154.849	203.102	144.871	131.513	261.136	0.880647	-0.13384
aifm5	LL0000000512	ENSDARG00000075551	557064	16.617	27.4416	20.5055	70.957	31.406	36.1874	0.23189	-1.10155
aig1	LL0000000513	ENSDARG00000007171	562261	9.77472	21.5613	19.529	214.842	55.9419	103.672	0.000101499	-2.88005
aimp1	LL0000000514	ENSDARG00000060036	562232	489.714	563.533	578.059	308.466	584.936	519.338	0.751449	0.207511
aimp2	LL0000000515	ENSDARG00000018903	406647	360.687	246.975	221.654	149.798	167.826	225.927	0.262545	0.60947
aip	LL0000000516	ENSDARG00000104437	334795	1261.92	2107.12	1715.63	750.962	869.553	801.991	0.00385652	1.06965
aipl1	LL0000000517	ENSDARG00000075067	100537095	44.9637	31.3619	41.9874	148.813	114.828	42.0556	0.0626042	-1.36937
aipl2	LL0000000518	ENSDARG00000098164	100534741	86.995	110.747	142.562	505.569	440.665	182.893	0.00114212	-1.73027
aire	LL0000000519	ENSDARG00000056784	100007662	13.6846	6.86041	12.6939	11.8262	11.7772	5.86822	0.936827	0.173776
ajap1	LL0000000520	ENSDARG00000038655	101887016	150.531	167.59	170.879	829.803	557.456	1472.92	3.09598e-08	-2.54821
ajuba	LL0000000521	ENSDARG00000077842	572549	698.893	831.089	837.795	418.843	631.064	524.228	0.16684	0.588962
ak1	LL0000000522	ENSDARG00000001950	445486	2483.76	1818.99	1393.4	402.09	512.31	935.982	0.00044908	1.62214
ak2	LL0000000523	ENSDARG00000005926	321793	3697.78	2738.28	3078.75	971.717	2426.11	1963.9	0.0926064	0.827472
ak3	LL0000000524	ENSDARG00000058226	406404	356.777	470.428	388.628	190.204	279.71	281.675	0.12872	0.693891
ak4	LL0000000525	ENSDARG00000006546	406590	369.485	491.989	504.825	251.306	223.768	156.486	0.00821462	1.11333
ak5	LL0000000526	ENSDARG00000012555	100003595	46.9187	18.6211	15.6232	98.5514	79.4964	162.354	0.00334339	-2.06835
ak5l	LL0000000527	ENSDARG00000017739	548336	87.9725	99.9659	48.8226	87.7107	82.4407	194.629	0.443298	-0.6237
AK6	LL0000000528	ENSDARG00000035573	415208	326.476	174.45	374.957	87.7107	279.71	333.511	0.732601	0.321434
ak7a	LL0000000529	ENSDARG00000019001	402854	32.2566	27.4416	10.741	86.7252	53.979	62.5944	0.0496585	-1.52918
ak7b	LL0000000530	ENSDARG00000017023	504040	3.90989	4.90029	0	42.3771	18.6473	18.5827	0.0198772	-3.17602
ak8	LL0000000531	ENSDARG00000030961	553671	1.95494	3.92023	5.85871	22.6668	16.6844	26.407	0.0459176	-2.48643
ak9	LL0000000532	ENSDARG00000021913	557708	52.7835	18.6211	37.1052	50.2612	60.8491	52.814	0.53979	-0.595142
akap10	LL0000000533	ENSDARG00000059549	566920	651.974	562.553	496.037	337.046	499.551	625.944	0.722793	0.225969
akap11	LL0000000534	ENSDARG00000075435	558595	542.497	462.587	364.216	387.307	313.078	508.579	0.788424	0.17965
akap12a	LL0000000535	ENSDARG00000091792	101885554	117.297	40.1824	84.9513	157.682	118.754	79.221	0.513943	-0.55282
akap12b	LL0000000536	ENSDARG00000055678	567365	7684.89	15074.3	8695.3	2190.8	3101.34	2117.45	2.2002e-07	2.0858
akap17a	LL0000000538	ENSDARG00000104768	393655	209.179	247.955	200.173	180.349	173.714	134.969	0.441068	0.426659
akap1a	LL0000000539	ENSDARG00000089802	100002545	9.77472	1.96012	0	16.7537	10.7958	5.86822	1	-1.50967
akap1b	LL0000000540	ENSDARG00000006062	556208	489.714	427.305	571.224	586.381	643.823	500.755	0.694503	-0.217947
akap6	LL0000000541	ENSDARG00000077295	100002625	40.0764	28.4217	41.9874	226.668	142.308	241.575	8.76229e-07	-2.46619
akap7	LL0000000542	ENSDARG00000043843	101885028	724.307	171.51	516.543	208.929	659.526	822.529	0.811146	-0.259762
akap8l	LL0000000543	ENSDARG00000099635	406500	1613.81	1289.76	1266.46	1314.68	1571.28	1733.08	0.793629	-0.147542
akap9	LL0000000544	ENSDARG00000079610	565037	471.142	416.525	428.662	680.99	704.672	898.816	0.0332214	-0.795353
akip1	LL0000000545	ENSDARG00000069037	562301	69.4005	42.1425	41.9874	47.3047	83.4221	88.0234	0.558995	-0.51082
akirin1	LL0000000546	ENSDARG00000039969	406432	843.559	1459.31	1095.58	703.657	1027.56	1113.01	0.675375	0.256823
akirin2	LL0000000547	ENSDARG00000058729	406855	553.249	634.098	756.75	538.091	728.226	451.853	0.778575	0.178235
akna	LL0000000548	ENSDARG00000087110	556113	150.531	158.769	175.761	288.756	253.211	188.761	0.246417	-0.591127
aknad1	LL0000000549	ENSDARG00000094414	100003458	3.90989	12.7408	18.5526	12.8117	11.7772	9.78037	0.9873	0.0346713
akr1a1a	LL0000000550	ENSDARG00000035257	445326	1.95494	13.7208	0	6.8986	4.90719	6.84626	1	-0.251072
akr1a1b	LL0000000551	ENSDARG00000052030	799805	278.58	418.485	402.298	225.683	463.238	577.042	0.799446	-0.203601
akr1b1	LL0000000552	ENSDARG00000006215	415138	217.976	208.752	232.395	101.508	118.754	182.893	0.182674	0.709145
akr7a3	LL0000000553	ENSDARG00000016649	436642	233.616	217.573	271.453	181.335	211.009	246.465	0.788019	0.177875
akt1	LL0000000554	ENSDARG00000099657	101910198	85.0401	28.4217	60.54	27.5944	63.7934	54.7701	0.836003	0.251536
akt1s1	LL0000000555	ENSDARG00000074667	566559	1712.53	1783.71	1547.68	758.846	879.368	902.729	0.00230097	0.989172
akt2	LL0000000556	ENSDARG00000011219	378972	2010.66	1553.39	1464.68	939.195	1173.8	1017.16	0.071877	0.683959
akt2l	LL0000000557	ENSDARG00000103612	403146	438.885	553.733	283.171	127.131	181.566	270.916	0.0276391	1.13816
akt3a	LL0000000558	ENSDARG00000104810	560549	98.7247	77.4246	154.279	195.132	145.253	109.54	0.549973	-0.445258
akt3b	LL0000000559	ENSDARG00000087205	100149794	470.164	391.043	346.64	502.612	429.869	444.029	0.745207	-0.18857
aktip	LL0000000560	ENSDARG00000026862	378716	650.997	1633.76	977.428	470.09	426.925	434.249	0.00451881	1.29304
AL590134.1	LL0000000561	ENSDARG00000095161		23.4593	50.963	25.3877	10.8407	13.7401	7.8243	0.111407	1.623
AL590145.1	LL0000000562	ENSDARG00000095967		0	0	0	27.5944	50.0533	107.584	5.10009e-09	-8.42309
AL590149.1	LL0000000564	ENSDARG00000012581	100537549	178.877	260.695	321.253	615.946	479.923	610.295	0.00530965	-1.16511
AL590150.1	LL0000000565	ENSDARG00000092341		23.4593	1.96012	20.5055	19.7103	17.6659	16.6266	0.908512	-0.233599
AL590151.1	LL0000000566	ENSDARG00000053570	368435	97.7472	125.447	118.151	84.7542	87.3479	95.8477	0.612984	0.34924
AL590151.2	LL0000000567	ENSDARG00000105320	103908760	0	3.92023	4.88226	6.8986	1.96287	5.86822	1	-0.742705
AL627305.1	LL0000000573	ENSDARG00000100324	572670	36.1665	1.96012	36.1287	47.3047	34.3503	7.8243	0.895559	-0.268853
AL627305.3	LL0000000575	ENSDARG00000102019	101884191	55.7159	37.2422	84.9513	56.1743	69.682	56.7262	0.975024	-0.0373486
AL645691.1	LL0000000576	ENSDARG00000102561	100536867	8.79725	3.92023	13.6703	8.86963	6.87006	0	1	0.745951
AL645691.2	LL0000000577	ENSDARG00000102716	100004373	0	0	12.6939	15.7682	0.981437	3.91215	1	-0.70243
AL645792.2	LL0000000579	ENSDARG00000103788	101883946	1.95494	3.92023	6.83516	24.6378	1.96287	5.86822	1	-1.35272
AL732488.1	LL0000000580	ENSDARG00000085246	110438942	1508.24	3260.65	1886.5	605.106	844.036	403.929	6.91987e-05	1.84461
AL732515.1	LL0000000581	ENSDARG00000095199		2.93242	0	4.88226	6.8986	7.8515	1.95607	1	-1.09566
AL732567.1	LL0000000582	ENSDARG00000102957		9.77472	0	6.83516	7.88411	6.87006	67.4846	0.189743	-2.30769
AL772146.2	LL0000000585	ENSDARG00000105823		4.88736	12.7408	3.90581	17.7393	8.83293	13.6925	0.613712	-0.903052
AL772219.1	LL0000000586	ENSDARG00000117701		12.7071	12.7408	4.88226	15.7682	6.87006	6.84626	0.985847	0.0409459
AL772241.2	LL0000040418	ENSDARG00000110792		0	0	13.6703	34.493	4.90719	3.91215	0.544528	-1.66331
AL772298.1	LL0000000587	ENSDARG00000089005		33.2341	0	9.76451	37.4495	0	29.3411	0.820762	-0.635272
AL772300.1	LL0000000589	ENSDARG00000097343		13.6846	50.963	24.4113	19.7103	18.6473	29.3411	0.78227	0.395463
AL772300.2	LL0000000590	ENSDARG00000117344		12.7071	6.86041	3.90581	6.8986	6.87006	1.95607	1	0.578254
AL772314.1	LL0000000591	ENSDARG00000097492		6.84231	3.92023	7.81161	50.2612	48.0904	62.5944	0.000127789	-3.115
AL772362.1	LL0000000592	ENSDARG00000097552		17.5945	3.92023	2.92935	9.85514	4.90719	0	1	0.728042
AL772373.1	LL0000000593	ENSDARG00000117427		19.5494	28.4217	8.78806	47.3047	4.90719	6.84626	0.98016	-0.0570694
AL772382.1	LL0000000594	ENSDARG00000097122		48.8736	30.3818	16.5997	36.464	36.3132	8.80234	0.885691	0.232793
AL773558.1	LL0000000595	ENSDARG00000098223		28.3467	71.5442	31.2464	44.3481	37.2946	44.9897	0.970745	0.0503475
AL805905.1	LL0000000596	ENSDARG00000112515		17.5945	0.980058	0	14.7827	6.87006	0	1	-0.220956
AL807749.1	LL0000000598	ENSDARG00000095989		0	0	8.78806	14.7827	13.7401	0	1	-1.6981
AL807792.1	LL0000000600	ENSDARG00000096836		34.2115	15.6809	32.2229	38.435	50.0533	94.8696	0.179844	-1.15896
AL808129.1	LL0000000602	ENSDARG00000097262		77.2203	65.6639	34.1758	212.871	100.107	291.455	0.0043052	-1.77139
AL831726.1	LL0000000604	ENSDARG00000086880	101883469	55.7159	18.6211	8.78806	18.7248	13.7401	17.6047	0.617688	0.731374
AL831726.2	LL0000000605	ENSDARG00000104185	101882696	7.81978	0	4.88226	9.85514	1.96287	7.8243	1	-0.628658
AL831726.3	LL0000000606	ENSDARG00000117226		8.79725	1.96012	0	3.94206	0	10.7584	1	-0.450706
AL831745.1	LL0000000607	ENSDARG00000039423	368914	17.5945	31.3619	20.5055	32.522	18.6473	62.5944	0.544131	-0.71191
AL831745.2	LL0000000608	ENSDARG00000094022	110440182	19.5494	3.92023	3.90581	4.92757	26.4988	21.5168	0.60709	-0.95163
AL831745.3	LL0000000609	ENSDARG00000101436		35.189	15.6809	0.976451	10.8407	7.8515	4.89019	0.561121	1.13669
AL831768.1	LL0000000610	ENSDARG00000100923	100534861	2.93242	13.7208	12.6939	12.8117	6.87006	9.78037	0.997613	-0.00560953
AL833789.1	LL0000000611	ENSDARG00000096811		18.572	0	3.90581	9.85514	11.7772	14.6706	0.782852	-0.691522
AL840638.1	LL0000000612	ENSDARG00000098608		683.253	635.078	548.766	420.814	567.271	643.549	0.74336	0.194459
AL844141.1	LL0000000614	ENSDARG00000096964		36.1665	3.92023	31.2464	42.3771	18.6473	20.5388	0.916864	-0.19314
AL844192.1	LL0000000618	ENSDARG00000100356	103909157	3.90989	0	1.9529	9.85514	0	6.84626	1	-1.51
AL844518.1	LL0000000619	ENSDARG00000111211	100150820	16.617	6.86041	15.6232	12.8117	16.6844	11.7364	0.970383	-0.0764806
AL845320.1	LL0000000625	ENSDARG00000092847		6.84231	6.86041	7.81161	9.85514	3.92575	5.86822	1	0.131035
AL845320.2	LL0000000626	ENSDARG00000114981	101884880	113.387	7.84046	56.6342	125.16	132.494	103.672	0.322789	-1.02249
AL845324.1	LL0000000627	ENSDARG00000023609		59.6258	43.1226	7.81161	100.522	44.1647	164.31	0.122495	-1.48284
AL845330.1	LL0000000629	ENSDARG00000108467	796214	27.3692	16.661	5.85871	32.522	37.2946	21.5168	0.489776	-0.872416
AL845362.1	LL0000000631	ENSDARG00000093205	110438043	1.95494	1.96012	2.92935	18.7248	17.6659	44.9897	0.00374945	-3.57164
AL845369.2	LL0000000634	ENSDARG00000095523		14.6621	6.86041	7.81161	1.97103	13.7401	0	1	0.900865
AL928650.2	LL0000000642	ENSDARG00000096526		0	0.980058	9.76451	0	4.90719	0	1	1.1307
AL928650.3	LL0000000643	ENSDARG00000096599	103911855	71.3555	74.4844	138.656	47.3047	115.81	24.4509	0.559832	0.601068
AL928650.4	LL0000000644	ENSDARG00000113858		158.351	62.7237	200.173	64.0584	310.134	44.0117	0.995084	0.0104806
AL928657.1	LL0000000645	ENSDARG00000097119		32.2566	27.4416	13.6703	65.0439	33.3689	18.5827	0.580106	-0.673102
AL928685.1	LL0000000647	ENSDARG00000095786	110438265	4.88736	0	0	6.8986	0.981437	3.91215	1	-1.27045
AL928685.2	LL0000000648	ENSDARG00000095907	555502	2.93242	30.3818	18.5526	10.8407	8.83293	10.7584	0.668986	0.769152
AL928707.3	LL0000000653	ENSDARG00000117700		0	4.90029	2.92935	9.85514	0.981437	3.91215	1	-0.913518
AL928714.1	LL0000000654	ENSDARG00000117452	103911738	27.3692	7.84046	23.4348	81.7977	26.4988	35.2093	0.215849	-1.29083
AL928808.1	LL0000000658	ENSDARG00000101333		105.567	19.6012	75.1868	162.61	80.4778	48.9019	0.635603	-0.543237
AL928824.1	LL0000000659	ENSDARG00000094456		78.1978	59.7835	74.2103	88.6963	52.9976	53.7921	0.908409	0.118416
AL928824.2	LL0000000660	ENSDARG00000096744		52.7835	27.4416	49.799	60.1164	62.812	43.0336	0.725836	-0.351967
AL928824.3	LL0000000661	ENSDARG00000096753		16.617	1.96012	7.81161	65.0439	57.9048	29.3411	0.0115712	-2.52855
AL928835.1	LL0000000662	ENSDARG00000096583		18.572	0.980058	6.83516	9.85514	0	1.95607	1	1.16025
AL928845.1	LL0000000663	ENSDARG00000093227	795715	5.86483	6.86041	7.81161	21.6813	21.5916	19.5607	0.177499	-1.61329
AL928854.1	LL0000000665	ENSDARG00000105454		77.2203	69.5841	44.9168	97.5659	89.3108	173.113	0.169537	-0.909024
AL928866.1	LL0000000666	ENSDARG00000095266		28.3467	0.980058	0.976451	4.92757	10.7958	1.95607	1	0.777526
AL928908.2	LL0000000672	ENSDARG00000097490		60.6033	43.1226	193.337	33.5075	109.921	49.8799	0.581606	0.619877
AL928908.3	LL0000000673	ENSDARG00000097636		20.5269	10.7806	4.88226	6.8986	4.90719	34.2313	0.876258	-0.347482
AL929009.1	LL0000000681	ENSDARG00000096446		32.2566	33.322	45.8932	39.4206	26.4988	64.5505	0.852279	-0.2271
AL929017.1	LL0000000683	ENSDARG00000074868	100170822	30.3016	1.96012	0	11.8262	0	14.6706	0.939021	0.284016
AL929028.1	LL0000000686	ENSDARG00000105095		67.4456	84.285	68.3516	171.479	112.865	84.1112	0.25285	-0.743395
AL929048.1	LL0000000688	ENSDARG00000117298	103911143	9.77472	15.6809	9.76451	62.0874	24.5359	20.5388	0.126607	-1.60526
AL929058.1	LL0000000689	ENSDARG00000092980		52.7835	0	120.104	16.7537	13.7401	7.8243	0.159476	2.17388
AL929105.1	LL0000000691	ENSDARG00000105194		4.88736	1.96012	2.92935	8.86963	11.7772	0	1	-1.07822
AL929114.2	LL0000000693	ENSDARG00000101825		89.9275	66.6439	25.3877	65.0439	65.7563	91.9355	0.789382	-0.291786
AL929171.1	LL0000000694	ENSDARG00000095920	110439353	12.7071	10.7806	6.83516	23.6523	7.8515	17.6047	0.672311	-0.695521
AL929192.1	LL0000000696	ENSDARG00000106684	100535847	0	0	0.976451	11.8262	8.83293	16.6266	1	-5.14862
AL929208.1	LL0000000697	ENSDARG00000105788	101885386	0	0	27.3406	0	0	0	1	5.65742
AL929210.1	LL0000000698	ENSDARG00000094943	101885961	5.86483	6.86041	3.90581	11.8262	6.87006	5.86822	1	-0.562596
AL929210.2	LL0000000699	ENSDARG00000117295		56.6934	167.59	86.9042	97.5659	53.979	75.3089	0.618575	0.456019
AL929216.1	LL0000000700	ENSDARG00000117377		0	0.980058	10.741	9.85514	14.7216	3.91215	1	-1.28095
AL929217.1	LL0000000701	ENSDARG00000059891	562831	20.5269	3.92023	8.78806	11.8262	7.8515	11.7364	0.972553	0.0813938
AL929220.1	LL0000000702	ENSDARG00000103323		3.90989	0	0.976451	6.8986	13.7401	7.8243	1	-2.54193
AL929222.2	LL0000000704	ENSDARG00000097738		1670.5	2026.76	1082.88	96.5804	155.067	278.741	1.8771e-10	3.17185
AL929229.1	LL0000000705	ENSDARG00000091975		2.93242	0	0	9.85514	6.87006	2.93411	1	-2.74465
AL929237.1	LL0000000706	ENSDARG00000094104	100536429	29.3242	18.6211	23.4348	13.7972	11.7772	39.1215	0.934982	0.141652
AL929237.2	LL0000040393	ENSDARG00000095450		15.6396	0	32.2229	50.2612	10.7958	9.78037	0.805469	-0.565359
AL929237.3	LL0000000707	ENSDARG00000096676	103909355	43.9863	21.5613	5.85871	34.493	28.4617	3.91215	0.96515	0.0949136
AL929243.1	LL0000000709	ENSDARG00000096290		59.6258	80.3648	58.5871	100.522	67.7192	54.7701	0.867504	-0.167353
AL929276.2	LL0000000712	ENSDARG00000116984	108181172	0.977472	1.96012	0	14.7827	3.92575	12.7145	1	-3.41987
AL929294.1	LL0000000713	ENSDARG00000117323		12.7071	0	3.90581	7.88411	6.87006	0	1	0.171525
AL929304.1	LL0000000714	ENSDARG00000105264		59.6258	12.7408	41.9874	76.8701	43.1832	33.2533	0.739567	-0.422747
AL929307.1	LL0000000716	ENSDARG00000105542		0	1.96012	0	10.8407	0	0.978037	1	-2.59256
AL929309.1	LL0000000717	ENSDARG00000097916		0.977472	0.980058	10.741	6.8986	1.96287	7.8243	1	-0.393743
AL929315.1	LL0000000718	ENSDARG00000092557		5.86483	0	27.3406	0.985514	0.981437	5.86822	1	2.08287
AL929378.1	LL0000000726	ENSDARG00000117372		3.90989	3.92023	4.88226	8.86963	8.83293	7.8243	1	-1.00571
AL929396.1	LL0000000727	ENSDARG00000096530		2.93242	6.86041	13.6703	33.5075	10.7958	16.6266	0.351569	-1.37653
AL929435.1	LL0000000728	ENSDARG00000097234		101.657	399.864	286.1	214.842	190.399	102.694	0.43181	0.632884
AL929457.1	LL0000000731	ENSDARG00000095483		1.95494	21.5613	25.3877	55.1888	30.4245	40.0995	0.258581	-1.36209
AL929457.2	LL0000000732	ENSDARG00000098067		0	0	0	6.8986	10.7958	0.978037	1	-5.11256
AL929493.2	LL0000000734	ENSDARG00000117535	110438403	1.95494	12.7408	2.92935	14.7827	6.87006	5.86822	1	-0.642976
AL929520.2	LL0000000736	ENSDARG00000095426		0	4.90029	1.9529	4.92757	13.7401	0	1	-1.44584
AL929523.1	LL0000000738	ENSDARG00000098006		1.95494	6.86041	9.76451	4.92757	7.8515	5.86822	1	-0.00524771
AL929536.3	LL0000000739	ENSDARG00000113274		48.8736	6.86041	73.2339	19.7103	57.9048	50.8579	0.997504	0.00554926
AL929576.1	LL0000000742	ENSDARG00000095566		18.572	3.92023	0.976451	19.7103	3.92575	2.93411	0.954606	-0.178742
AL929586.1	LL0000000743	ENSDARG00000098634		9.77472	0	0	6.8986	7.8515	1.95607	1	-0.773047
AL935044.1	LL0000000744	ENSDARG00000088051	100537716	16.617	7.84046	0	18.7248	10.7958	3.91215	0.869751	-0.450847
AL935044.3	LL0000000746	ENSDARG00000104428	564387	2.93242	30.3818	10.741	52.2322	8.83293	9.78037	0.720621	-0.685302
AL935044.4	LL0000000747	ENSDARG00000104677	103910210	3.90989	0	0	1.97103	6.87006	11.7364	1	-2.39582
AL935053.1	LL0000000748	ENSDARG00000105513		62.5582	9.80058	46.8697	42.3771	44.1647	40.0995	0.956647	-0.0869362
AL935065.1	LL0000000749	ENSDARG00000099693	567472	10.7522	0	12.6939	5.91308	3.92575	20.5388	0.896451	-0.3737
AL935115.1	LL0000000750	ENSDARG00000097120		38.1214	132.308	31.2464	270.031	47.109	110.518	0.285178	-1.08444
AL935126.2	LL0000000753	ENSDARG00000111309		6.84231	1.96012	11.7174	40.4061	16.6844	11.7364	0.215596	-1.74555
AL935144.1	LL0000000754	ENSDARG00000093040		3.90989	0.980058	0	11.8262	0.981437	1.95607	1	-1.59385
AL935153.1	LL0000000757	ENSDARG00000092042	103911520	0	0	13.6703	0	0	3.91215	1	1.80438
AL935166.1	LL0000000758	ENSDARG00000095991		35.189	15.6809	39.0581	84.7542	97.1623	178.003	0.00243145	-2.00078
AL935174.2	LL0000000759	ENSDARG00000112088	563626	336.25	545.892	401.322	282.843	227.693	268.96	0.11378	0.719424
AL935174.3	LL0000000760	ENSDARG00000115129		7.81978	0.980058	0.976451	11.8262	6.87006	2.93411	1	-1.14538
AL935174.5	LL0000000761	ENSDARG00000117464	563381	368.507	534.132	459.909	408.988	462.257	503.689	0.985608	-0.0130742
AL935184.2	LL0000000764	ENSDARG00000095408	101883053	9.77472	7.84046	2.92935	24.6378	18.6473	19.5607	0.208944	-1.61313
AL935186.1	LL0000000765	ENSDARG00000025046		4.88736	7.84046	0	11.8262	8.83293	1.95607	1	-0.829322
AL935186.2	LL0000000766	ENSDARG00000097345		0	0	9.76451	4.92757	6.87006	2.93411	1	-0.592991
AL935186.6	LL0000000767	ENSDARG00000112275		80.1527	39.2023	100.574	178.378	79.4964	15.6486	0.824236	-0.314492
AL935186.9	LL0000000768	ENSDARG00000113671	110438638	2130.89	904.594	2394.26	1271.31	1446.64	665.065	0.274987	0.682584
AL935195.1	LL0000000769	ENSDARG00000110728		1.95494	0	0	1.97103	3.92575	7.8243	1	-2.81107
AL935198.1	LL0000000770	ENSDARG00000092975		12.7071	6.86041	0	13.7972	0	14.6706	1	-0.540907
AL935199.1	LL0000000772	ENSDARG00000077746	100001479	42.0313	13.7208	41.9874	40.4061	28.4617	35.2093	0.95266	-0.0905241
AL935269.1	LL0000000773	ENSDARG00000117790		9.77472	1.96012	3.90581	4.92757	4.90719	2.93411	1	0.292896
AL935279.1	LL0000000774	ENSDARG00000071407		10.7522	3.92023	5.85871	14.7827	17.6659	5.86822	0.62633	-0.899955
AL935294.2	LL0000000777	ENSDARG00000104739		3.90989	6.86041	11.7174	21.6813	13.7401	14.6706	0.440989	-1.15529
AL935295.1	LL0000000778	ENSDARG00000092636	101885157	148.576	126.427	65.4222	106.436	33.3689	65.5285	0.386823	0.729439
AL935295.2	LL0000000779	ENSDARG00000117663		175.945	249.915	209.937	319.307	178.622	122.255	0.971312	0.0359283
AL935300.2	LL0000000782	ENSDARG00000097519		10.7522	3.92023	3.90581	11.8262	20.6102	9.78037	0.481948	-1.18412
AL935300.3	LL0000000783	ENSDARG00000098661	101885450	48.8736	77.4246	87.8806	84.7542	67.7192	82.1551	0.894003	-0.131554
AL953866.1	LL0000000793	ENSDARG00000096884		0	0.980058	7.81161	0.985514	8.83293	0	1	-0.159169
AL953867.1	LL0000000794	ENSDARG00000070885	100307083	0	4.90029	37.1052	32.522	20.6102	0	0.916294	-0.338811
AL953867.2	LL0000000795	ENSDARG00000095689		8.79725	0	1.9529	4.92757	13.7401	0	1	-0.795984
AL953875.1	LL0000000796	ENSDARG00000117502		0.977472	3.92023	7.81161	21.6813	11.7772	11.7364	0.267235	-1.83005
AL953886.1	LL0000000797	ENSDARG00000101745		9.77472	3.92023	0	6.8986	3.92575	8.80234	1	-0.519255
AL953894.1	LL0000000800	ENSDARG00000093393	103909137	17.5945	4.90029	15.6232	31.5364	13.7401	4.89019	0.843506	-0.395904
AL953896.1	LL0000000801	ENSDARG00000092472		16.617	6.86041	13.6703	23.6523	13.7401	10.7584	0.833125	-0.374029
AL953907.1	LL0000000805	ENSDARG00000094823	792450	6.84231	0.980058	4.88226	29.5654	0.981437	6.84626	0.49071	-1.55702
AL953907.2	LL0000000806	ENSDARG00000113960		33.2341	37.2422	18.5526	35.4785	16.6844	12.7145	0.737906	0.456745
AL953910.1	LL0000000807	ENSDARG00000103508		4.88736	0.980058	0.976451	6.8986	0	4.89019	1	-0.784348
AL954129.1	LL0000000808	ENSDARG00000105524	103911374	3.90989	0.980058	0	16.7537	6.87006	9.78037	1	-2.77204
AL954134.1	LL0000000809	ENSDARG00000092078	101882305	23.4593	22.5413	23.4348	44.3481	7.8515	11.7364	0.950732	0.11932
AL954138.1	LL0000000813	ENSDARG00000117322	101884073	0	0	2.92935	16.7537	4.90719	4.89019	1	-3.17911
AL954142.1	LL0000000814	ENSDARG00000092288	564963	0	1.96012	13.6703	13.7972	1.96287	5.86822	1	-0.468221
AL954142.2	LL0000000815	ENSDARG00000095277		1.95494	0.980058	8.78806	11.8262	10.7958	1.95607	1	-1.06756
AL954142.3	LL0000000816	ENSDARG00000117430		8.79725	9.80058	0	22.6668	10.7958	9.78037	0.554253	-1.21739
AL954145.2	LL0000000818	ENSDARG00000117560		1.95494	0.980058	5.85871	5.91308	1.96287	9.78037	1	-1.00549
AL954146.1	LL0000000819	ENSDARG00000038891	560023	3.90989	3.92023	2.92935	47.3047	109.921	73.3528	9.61111e-08	-4.42172
AL954149.2	LL0000000821	ENSDARG00000094185		32.2566	22.5413	28.3171	12.8117	40.2389	37.1654	0.939601	-0.118396
AL954191.1	LL0000000823	ENSDARG00000117407	101885516	35.189	90.1653	87.8806	49.2757	96.1808	173.113	0.55162	-0.579257
AL954317.1	LL0000000824	ENSDARG00000095834		3.90989	3.92023	13.6703	4.92757	0.981437	0	1	1.86453
AL954322.2	LL0000000826	ENSDARG00000097072	101882098	215.044	257.755	273.406	98.5514	99.1251	81.1771	0.000711307	1.4201
AL954322.3	LL0000000827	ENSDARG00000097266	101886962	334.296	382.223	240.207	212.871	141.327	143.771	0.0469748	0.942083
AL954327.1	LL0000000828	ENSDARG00000091368	567978	12.7071	12.7408	16.5997	27.5944	43.1832	14.6706	0.383224	-1.02293
AL954359.1	LL0000000829	ENSDARG00000093646	103911997	18.572	0.980058	10.741	105.45	121.698	175.069	3.87952e-06	-3.73063
AL954361.1	LL0000000830	ENSDARG00000078364	570571	14.6621	9.80058	17.5761	16.7537	21.5916	9.78037	0.914771	-0.194925
AL954387.1	LL0000000831	ENSDARG00000097221		3.90989	6.86041	18.5526	15.7682	13.7401	8.80234	0.851987	-0.385499
AL954655.1	LL0000000832	ENSDARG00000052626		13.6846	0	0	47.3047	1.96287	0	0.798872	-1.84798
AL954655.2	LL0000000833	ENSDARG00000092719		7.81978	0.980058	16.5997	11.8262	28.4617	6.84626	0.657521	-0.891734
AL954666.1	LL0000000834	ENSDARG00000097918		0	0.980058	1.9529	0.985514	0	9.78037	1	-1.87622
AL954669.1	LL0000000835	ENSDARG00000097096		50.8286	63.7038	78.1161	94.6093	63.7934	56.7262	0.875567	-0.159137
AL954672.1	LL0000000836	ENSDARG00000105627		2.93242	0	0	7.88411	6.87006	5.86822	1	-2.81373
AL954682.1	LL0000000837	ENSDARG00000112674		720.397	828.149	731.362	60.1164	216.898	158.442	2.90456e-06	2.38831
AL954694.1	LL0000000838	ENSDARG00000092131	103911097	44.9637	96.0457	66.3987	54.2033	50.0533	76.2869	0.847801	0.200031
AL954695.1	LL0000000840	ENSDARG00000053731		9.77472	0	0	7.88411	6.87006	0	1	-0.593748
AL954695.2	LL0000000841	ENSDARG00000079925		9.77472	1.96012	2.92935	12.8117	7.8515	14.6706	0.504711	-1.26866
AL954695.3	LL0000000842	ENSDARG00000094127		7.81978	1.96012	0.976451	24.6378	16.6844	5.86822	0.215596	-2.1331
AL954696.1	LL0000000843	ENSDARG00000078442	100332577	178.877	154.849	203.102	123.189	212.972	172.135	0.925515	0.0787745
AL954696.2	LL0000000844	ENSDARG00000117348		29.3242	7.84046	33.1993	41.3916	30.4245	14.6706	0.852016	-0.297404
AL954703.1	LL0000000847	ENSDARG00000117314		0.977472	0	0	10.8407	0.981437	3.91215	1	-3.90368
AL954741.2	LL0000000849	ENSDARG00000115737		221.886	179.351	87.8806	172.465	152.123	169.2	0.988017	-0.0137247
AL954767.1	LL0000000850	ENSDARG00000094503		0	0.980058	16.5997	18.7248	8.83293	19.5607	0.526971	-1.42213
AL954831.1	LL0000000851	ENSDARG00000097701	110438180	4.88736	0	0	5.91308	13.7401	0	1	-2.00742
alad	LL0000000856	ENSDARG00000100372	550338	133.914	286.177	233.372	144.871	194.325	189.739	0.674618	0.304979
alas1	LL0000000857	ENSDARG00000021059	64608	2038.03	1982.66	2036.88	1058.44	1914.78	1447.5	0.336068	0.454452
alas2	LL0000000858	ENSDARG00000038643	64607	25.4143	22.5413	13.6703	384.35	48.0904	104.65	0.000185671	-3.12354
alcama	LL0000000859	ENSDARG00000026531	30194	4614.65	5394.24	5328.5	1515.72	1835.29	2061.7	2.02772e-06	1.50262
alcamb	LL0000000860	ENSDARG00000058538	323919	302.039	518.451	447.215	1037.75	682.099	806.881	0.0191835	-0.99505
aldh16a1	LL0000000861	ENSDARG00000037935	492710	86.0176	182.291	193.337	92.6383	138.383	175.069	0.842401	0.18493
aldh18a1	LL0000000862	ENSDARG00000099579	557186	757.541	1082.96	747.962	724.353	659.526	656.263	0.485372	0.343426
aldh1a2	LL0000000863	ENSDARG00000053493	116713	1823.96	5737.26	2789.72	733.222	1108.04	2038.23	0.0156064	1.41581
aldh1a3	LL0000000864	ENSDARG00000076933	751785	16.617	28.4217	64.4458	92.6383	145.253	140.837	0.00989399	-1.79039
aldh1l1	LL0000000865	ENSDARG00000077004	100526683	146.621	462.587	361.287	228.639	367.057	447.941	0.916141	-0.104859
aldh1l2	LL0000000866	ENSDARG00000070230	100333269	21.5044	148.969	56.6342	125.16	43.1832	27.385	0.890966	0.214585
aldh2.1	LL0000000867	ENSDARG00000089924	393462	1462.3	2301.18	1487.14	723.367	822.444	824.486	0.00187709	1.14741
aldh2.2	LL0000000868	ENSDARG00000028087	368239	244.368	916.354	571.224	288.756	270.877	260.158	0.0639463	1.07906
aldh3a1	LL0000000869	ENSDARG00000074791	100000026	69.4005	238.154	109.363	80.8121	46.1275	84.1112	0.195175	0.982133
aldh3a2a	LL0000000870	ENSDARG00000028259	323653	91.8824	158.769	108.386	71.9425	67.7192	102.694	0.411637	0.566926
aldh3a2b	LL0000000871	ENSDARG00000029381	447920	306.926	246.975	231.419	151.769	224.749	184.849	0.368085	0.484315
aldh3b1	LL0000000872	ENSDARG00000013839	282559	54.7385	53.9032	89.8335	53.2178	116.791	171.157	0.326805	-0.781564
aldh3b2	LL0000000873	ENSDARG00000035606	557008	284.444	335.18	290.983	281.857	272.84	273.85	0.825986	0.136241
aldh4a1	LL0000000874	ENSDARG00000038207	394133	135.869	250.895	240.207	77.8556	111.884	83.1332	0.0200905	1.20015
aldh5a1	LL0000000875	ENSDARG00000076544	565235	241.436	638.018	293.912	334.089	226.712	234.729	0.403665	0.560667
aldh6a1	LL0000000876	ENSDARG00000053485	436647	2813.17	2631.46	3345.32	1225.98	2070.83	1625.5	0.0322331	0.836516
aldh7a1	LL0000000877	ENSDARG00000018426	334197	1066.42	1651.4	1478.35	645.512	1006.95	1007.38	0.144714	0.657718
aldh8a1	LL0000000878	ENSDARG00000036776	447801	31.2791	7.84046	33.1993	17.7393	16.6844	28.3631	0.90439	0.203916
aldh9a1a.1	LL0000000879	ENSDARG00000069100	100005587	5163.01	4793.46	4577.6	1137.28	1894.17	2417.71	0.000328587	1.41532
aldh9a1a.2	LL0000000880	ENSDARG00000055331	100006238	4.88736	3.92023	16.5997	9.85514	4.90719	5.86822	1	0.300758
aldh9a1b	LL0000000881	ENSDARG00000037061	399481	316.701	507.67	326.135	123.189	134.457	125.189	0.000127659	1.58746
aldoaa	LL0000000882	ENSDARG00000011665	336425	1803.44	2726.52	2807.3	1739.43	2423.17	3159.06	0.997504	0.00306466
aldoab	LL0000000883	ENSDARG00000034470	406496	240.458	303.818	188.455	100.522	100.107	197.564	0.122848	0.87973
aldob	LL0000000884	ENSDARG00000053684	321664	12731.6	5285.45	6213.16	1157.98	2922.72	3962.03	0.00494201	1.59105
aldoca	LL0000000885	ENSDARG00000057661	792692	21.5044	15.6809	15.6232	104.464	163.9	154.53	7.78596e-08	-3.00146
aldocb	LL0000000886	ENSDARG00000019702	369193	1005.82	825.209	799.714	2375.09	2339.75	6002.22	1.66347e-05	-2.02637
alg1	LL0000000887	ENSDARG00000054963	334161	185.72	227.373	154.279	210.9	105.995	153.552	0.718533	0.270288
alg10	LL0000000888	ENSDARG00000053917	100331575	32.2566	53.9032	100.574	180.349	60.8491	64.5505	0.462779	-0.711249
alg11	LL0000000889	ENSDARG00000031202	407614	106.544	87.2252	100.574	136.986	106.977	129.101	0.61442	-0.341894
alg12	LL0000000890	ENSDARG00000041199	569494	276.625	465.528	373.004	243.422	417.111	323.73	0.802974	0.180107
alg13	LL0000000891	ENSDARG00000054374	557181	8.79725	0	3.90581	14.7827	10.7958	9.78037	1	-1.47661
alg14	LL0000000892	ENSDARG00000103093	450072	31.2791	40.1824	55.6577	36.464	26.4988	40.0995	0.788424	0.302669
alg2	LL0000000893	ENSDARG00000070399	403068	154.441	300.878	203.102	167.537	220.823	162.354	0.722997	0.257684
alg3	LL0000000894	ENSDARG00000053155	553725	89.9275	155.829	98.6216	125.16	134.457	66.5065	0.940086	0.0786025
alg5	LL0000000895	ENSDARG00000061235	751635	504.376	571.374	518.496	310.437	411.222	408.82	0.262749	0.495918
alg6	LL0000000896	ENSDARG00000017617	445327	96.7698	105.846	145.491	129.102	141.327	105.628	0.896095	-0.11138
alg8	LL0000000897	ENSDARG00000044627	327601	106.544	188.171	189.432	142.9	155.067	170.179	0.957622	0.0484657
alg9	LL0000000898	ENSDARG00000012840	393598	356.777	301.858	174.785	451.365	337.614	501.733	0.245909	-0.631066
alk	LL0000000899	ENSDARG00000095833	563509	45.9412	27.4416	21.4819	127.131	70.6635	111.496	0.00796068	-1.705
alkal1	LL0000000900	ENSDARG00000074387	100535009	367.53	102.906	155.256	56.1743	63.7934	19.5607	0.00224632	2.16502
alkal2a	LL0000000901	ENSDARG00000091073	101886413	122.184	74.4844	56.6342	64.0584	48.0904	18.5827	0.266647	0.954424
alkal2b	LL0000000902	ENSDARG00000042815	100329254	126.094	30.3818	97.6451	22.6668	40.2389	45.9678	0.152932	1.22279
alkbh1	LL0000000903	ENSDARG00000071164	553720	158.351	101.926	178.691	85.7397	181.566	138.881	0.905883	0.111954
alkbh2	LL0000000904	ENSDARG00000059856	569291	27.3692	53.9032	31.2464	21.6813	34.3503	31.2972	0.758197	0.3655
alkbh3	LL0000000905	ENSDARG00000045606	792266	145.643	185.231	299.771	156.697	112.865	143.771	0.31951	0.609548
alkbh4	LL0000000906	ENSDARG00000052247	553475	86.0176	93.1055	82.9984	67.015	100.107	141.815	0.786415	-0.237173
alkbh5	LL0000000907	ENSDARG00000063003	570158	226.774	157.789	164.044	138.957	165.863	223.971	0.952242	0.0530353
alkbh6	LL0000000908	ENSDARG00000077253	317736	18.572	19.6012	39.0581	33.5075	31.406	22.4949	0.901105	-0.178448
alkbh7	LL0000000909	ENSDARG00000037906	550272	83.0852	85.265	42.9639	61.1019	75.5707	102.694	0.860932	-0.179935
alkbh8	LL0000000910	ENSDARG00000060256	556362	301.061	113.687	163.067	83.7687	152.123	131.057	0.359029	0.655009
allc	LL0000000911	ENSDARG00000042562	436989	41.0538	0.980058	22.4584	14.7827	10.7958	18.5827	0.786415	0.546386
alms1	LL0000000912	ENSDARG00000074779	561882	592.348	718.383	599.541	500.641	627.138	391.215	0.536117	0.330667
alox12	LL0000000913	ENSDARG00000069463	322732	105.567	191.111	73.2339	120.233	129.55	215.168	0.706896	-0.329981
alox5a	LL0000000914	ENSDARG00000057273	567204	150.531	140.148	92.7629	125.16	158.993	253.312	0.480882	-0.487231
alox5ap	LL0000000915	ENSDARG00000054755	337376	16.617	16.661	38.0816	8.86963	16.6844	22.4949	0.694231	0.570461
alox5b.1	LL0000000916	ENSDARG00000043085	573013	13.6846	0	1.9529	6.8986	3.92575	2.93411	1	0.184966
alox5b.2	LL0000000917	ENSDARG00000043089	724056	1.95494	0	2.92935	15.7682	1.96287	1.95607	1	-2.01032
alox5b.3	LL0000000918	ENSDARG00000069966	553602	34.2115	9.80058	9.76451	25.6234	13.7401	3.91215	0.87924	0.31373
ALOXE3	LL0000000919	ENSDARG00000073781	794132	11.7297	1.96012	2.92935	12.8117	7.8515	3.91215	1	-0.564062
alp3	LL0000000920	ENSDARG00000098063	100330410	9.77472	7.84046	8.78806	11.8262	6.87006	5.86822	0.96517	0.104373
alpi.1	LL0000000921	ENSDARG00000015273	541539	430.088	976.138	578.059	240.465	390.612	442.073	0.0988842	0.886734
alpi.2	LL0000000922	ENSDARG00000053774	574009	25.4143	40.1824	46.8697	35.4785	36.3132	9.78037	0.719863	0.463522
alpk2	LL0000000923	ENSDARG00000079637	559835	50.8286	39.2023	52.7284	89.6818	41.2204	61.6164	0.643743	-0.431316
alpk3a	LL0000000924	ENSDARG00000078989	100321139	54.7385	19.6012	22.4584	51.2467	51.0347	24.4509	0.759874	-0.388618
alpk3b	LL0000000925	ENSDARG00000105630	100534893	19.5494	13.7208	34.1758	69.9715	44.1647	39.1215	0.180034	-1.18396
alpl	LL0000000926	ENSDARG00000015546	393982	803.482	1208.41	870.018	247.364	359.206	276.785	6.22265e-06	1.70595
als2a	LL0000000927	ENSDARG00000075111	557014	256.098	346.941	305.629	120.233	149.178	276.785	0.201805	0.734261
als2b	LL0000000928	ENSDARG00000076924	100318899	662.726	693.881	471.626	484.873	426.925	420.556	0.329409	0.456475
alx1	LL0000000929	ENSDARG00000062824	565176	580.619	952.616	480.414	122.204	195.306	205.388	1.56914e-05	1.94516
alx4a	LL0000000930	ENSDARG00000088332	100006399	1509.22	1502.43	1419.76	285.799	656.581	465.546	6.31534e-05	1.65418
alx4b	LL0000000931	ENSDARG00000074442	497424	388.057	396.924	198.22	59.1308	72.6263	90.9575	9.00072e-06	2.1422
alyref	LL0000000932	ENSDARG00000077732	560127	3282.35	4299.51	3405.86	2898.4	3712.78	2907.71	0.689224	0.207029
amacr	LL0000000933	ENSDARG00000057435	553653	50.8286	90.1653	69.328	88.6963	116.791	76.2869	0.594701	-0.421959
ambn	LL0000000934	ENSDARG00000075598	100001700	22.4819	0	0.976451	17.7393	10.7958	1.95607	0.90818	-0.378056
ambp	LL0000000935	ENSDARG00000004296	394093	134.891	75.4645	97.6451	43.3626	66.7377	186.805	0.968193	0.0528343
ambra1a	LL0000000936	ENSDARG00000008322	100332642	391.966	390.063	379.84	321.278	397.482	367.742	0.879705	0.0967464
ambra1b	LL0000000937	ENSDARG00000039878	559106	496.556	518.451	513.613	474.032	501.514	620.076	0.924572	-0.061904
amd1	LL0000000938	ENSDARG00000043856	792097	1344.02	1715.1	1469.56	1532.47	1859.82	1929.67	0.640603	-0.232873
AMDHD1	LL0000000939	ENSDARG00000007366	402826	23.4593	12.7408	0.976451	30.5509	18.6473	33.2533	0.448029	-1.14922
amdhd2	LL0000000940	ENSDARG00000100376	402981	301.061	375.362	279.265	157.682	175.677	241.575	0.122126	0.733088
amer1	LL0000000941	ENSDARG00000079624	100885784	390.011	427.305	422.803	429.684	359.206	493.909	0.944371	-0.0488243
amer2	LL0000000942	ENSDARG00000075222	100101649	132.936	176.41	155.256	740.121	537.828	391.215	1.02631e-05	-1.84504
amfra	LL0000000943	ENSDARG00000020218	406442	1345.98	937.916	982.31	516.409	784.168	660.175	0.0795287	0.736201
amfrb	LL0000000944	ENSDARG00000105578	101884807	77.2203	85.265	103.504	50.2612	75.5707	27.385	0.300918	0.795873
amh	LL0000000945	ENSDARG00000014357	493624	21.5044	4.90029	23.4348	32.522	7.8515	18.5827	0.900913	-0.242122
amigo1	LL0000000946	ENSDARG00000079620	100144409	141.733	98.9859	104.48	408.003	312.097	547.701	1.27504e-05	-1.87683
amigo3	LL0000000947	ENSDARG00000074469	100000131	42.0313	43.1226	20.5055	170.494	112.865	157.464	0.000251679	-2.06085
ammecr1	LL0000000948	ENSDARG00000012892	393553	2442.7	3591.91	2859.05	2358.33	2379.98	1862.18	0.331262	0.430204
amn	LL0000000949	ENSDARG00000062947	793454	10.7522	6.86041	6.83516	23.6523	17.6659	16.6266	0.34135	-1.24488
amn1	LL0000000950	ENSDARG00000070478	751744	152.486	177.391	98.6216	135.015	138.383	209.3	0.836549	-0.1719
amot	LL0000000951	ENSDARG00000078335	563421	203.314	635.078	438.427	217.799	239.471	113.452	0.0552627	1.16172
amotl2a	LL0000000952	ENSDARG00000061923	558920	3706.58	6480.14	4618.62	1087.02	1515.34	1169.73	8.85359e-08	1.97268
amotl2b	LL0000000953	ENSDARG00000061948	559784	1970.58	3134.23	1817.18	505.569	918.625	324.708	4.4592e-05	1.98474
ampd1	LL0000000954	ENSDARG00000033832	393867	33.2341	51.9431	41.9874	32.522	43.1832	27.385	0.784875	0.302788
ampd2a	LL0000000955	ENSDARG00000104491	100330772	80.1527	36.2621	87.8806	37.4495	44.1647	33.2533	0.311637	0.830758
ampd2b	LL0000000956	ENSDARG00000029952	571355	232.638	155.829	150.374	220.755	152.123	274.829	0.716699	-0.265492
ampd3a	LL0000000957	ENSDARG00000005800	556578	42.0313	42.1425	35.1523	125.16	82.4407	24.4509	0.299601	-0.959437
ampd3b	LL0000000958	ENSDARG00000032469	333997	86.0176	56.8434	61.5164	55.1888	118.754	171.157	0.329051	-0.755847
amph	LL0000000959	ENSDARG00000007663	393804	28.3467	46.0627	115.221	869.223	443.61	1049.43	2.54942e-09	-3.63885
amt	LL0000000960	ENSDARG00000010862	450000	87.9725	227.373	131.821	105.45	129.55	173.113	0.893077	0.131774
amy2a	LL0000000961	ENSDARG00000013856	406539	7.81978	6.86041	2.92935	11.8262	1.96287	37.1654	0.403503	-1.53309
anapc1	LL0000000962	ENSDARG00000075687	568795	196.472	211.693	196.267	198.088	285.598	192.673	0.814735	-0.162217
anapc10	LL0000000963	ENSDARG00000090152	798352	127.071	128.388	129.868	85.7397	135.438	203.432	0.878269	-0.140132
anapc11	LL0000000964	ENSDARG00000102531	768140	333.318	289.117	187.479	137.972	208.065	385.347	0.87618	0.147084
anapc13	LL0000000965	ENSDARG00000078435	569473	257.075	84.285	102.527	78.8411	134.457	188.761	0.899358	0.142745
anapc15	LL0000000966	ENSDARG00000101285	751740	260.008	245.015	271.453	128.117	183.529	276.785	0.537257	0.40001
anapc16	LL0000000967	ENSDARG00000013822	550576	602.123	348.901	324.182	216.813	400.426	589.757	0.935461	0.0792807
anapc2	LL0000000968	ENSDARG00000105035	100318335	111.432	164.65	113.268	107.421	149.178	151.596	0.939744	-0.0682572
anapc4	LL0000000969	ENSDARG00000032237	494046	91.8824	126.427	136.703	74.8991	99.1251	105.628	0.638334	0.344186
anapc5	LL0000000970	ENSDARG00000008461	322854	210.157	177.391	145.491	136.001	158.011	164.31	0.751595	0.217848
anapc7	LL0000000971	ENSDARG00000063005	558402	223.841	214.633	198.22	134.03	173.714	161.376	0.412699	0.440614
and1	LL0000000972	ENSDARG00000088514	794315	2258.94	2461.91	2929.35	260.176	244.378	526.184	1.04815e-11	2.89178
and2	LL0000000973	ENSDARG00000079302	566702	13603.5	14093.2	13504.3	353.8	325.837	1268.51	3.48618e-14	4.40248
and3	LL0000000974	ENSDARG00000056873	561047	128.049	117.607	264.618	120.233	90.2922	232.773	0.840044	0.202969
and4	LL0000000975		100192207	31.2791	27.4416	56.6342	0.985514	3.92575	0.978037	0.000160481	4.29179
angel1	LL0000000976	ENSDARG00000077567	569547	123.162	88.2052	136.703	100.522	136.42	116.386	0.981518	-0.0216239
angel2	LL0000000977	ENSDARG00000016743	562704	188.652	244.034	179.667	167.537	161.937	187.783	0.704639	0.243452
angpt1	LL0000000978	ENSDARG00000030364	114407	737.014	587.055	699.139	223.712	315.041	209.3	0.000139512	1.43544
angpt2a	LL0000000979	ENSDARG00000014946	101101687	12.7071	0	7.81161	11.8262	7.8515	12.7145	0.791837	-0.658543
angpt2b	LL0000000980	ENSDARG00000053906	114408	874.838	623.317	428.662	45.3336	77.5335	58.6822	1.93431e-13	3.40772
angpt4	LL0000000981	ENSDARG00000076787	571050	158.351	161.71	175.761	48.2902	50.0533	22.4949	0.000138963	2.03692
angptl1a	LL0000000982	ENSDARG00000012071	544656	3382.05	3332.2	3281.85	454.322	967.697	498.799	4.84148e-09	2.37964
angptl1b	LL0000000983	ENSDARG00000100159	334311	151.508	60.7636	155.256	29.5654	18.6473	14.6706	0.00013995	2.54739
angptl2a	LL0000000984	ENSDARG00000024030	569092	261.963	310.678	251.924	84.7542	132.494	60.6383	0.00110978	1.56917
angptl2b	LL0000000985	ENSDARG00000068369	503514	642.199	1453.43	801.667	462.206	771.41	389.259	0.132604	0.836151
angptl3	LL0000000986	ENSDARG00000044365	114421	361.665	398.884	653.246	37.4495	23.5545	54.7701	1.07381e-12	3.61006
angptl4	LL0000000987	ENSDARG00000035859	492647	18803.6	26346.9	13921.3	4239.68	6603.11	1189.29	0.000109835	2.29559
angptl5	LL0000000988	ENSDARG00000056630	566212	533.7	1714.12	892.477	196.117	318.967	212.234	4.45469e-05	2.11023
angptl6	LL0000000989	ENSDARG00000020265	561927	188.652	60.7636	195.29	34.493	10.7958	36.1874	0.000852966	2.44842
angptl7	LL0000000990	ENSDARG00000027582	450053	1922.69	7422.96	3553.31	1859.66	2000.17	1233.31	0.0162962	1.34063
ank1a	LL0000000991	ENSDARG00000092143	449796	82.1077	30.3818	37.1052	334.089	386.686	344.269	3.13391e-08	-2.83173
ank1b	LL0000000992	ENSDARG00000074777	797662	72.333	31.3619	60.54	202.03	121.698	412.732	0.000616412	-2.16483
ank2a	LL0000000993	ENSDARG00000009026	568926	96.7698	99.9659	124.009	736.179	426.925	829.376	4.93033e-10	-2.63505
ank2b	LL0000000994	ENSDARG00000043313	450043	389.034	402.804	422.803	3647.39	1363.22	1893.48	2.23076e-08	-2.50691
ank3a	LL0000000995	ENSDARG00000061736	103909035	93.8373	69.5841	86.9042	491.771	260.081	431.314	4.3652e-07	-2.24074
ank3b	LL0000000996	ENSDARG00000110151	100126016	1232.59	1190.77	1177.6	2135.61	2301.47	3092.55	0.00175617	-1.0642
ankar	LL0000000997	ENSDARG00000000516	368636	29.3242	0.980058	23.4348	32.522	13.7401	11.7364	0.962426	-0.109806
ankdd1a	LL0000000998	ENSDARG00000098647	569271	77.2203	80.3648	56.6342	63.0729	56.9233	44.0117	0.647949	0.38537
ankdd1b	LL0000000999	ENSDARG00000025866	562681	7.81978	7.84046	21.4819	18.7248	21.5916	11.7364	0.775352	-0.486727
ankef1a	LL0000001000	ENSDARG00000019135	566413	17.5945	6.86041	21.4819	34.493	21.5916	16.6266	0.638611	-0.662275
ankef1b	LL0000001001	ENSDARG00000060211	100149106	96.7698	53.9032	62.4929	25.6234	21.5916	18.5827	0.013368	1.696
ANKFN1	LL0000001002	ENSDARG00000060941	100333998	80.1527	66.6439	88.8571	60.1164	80.4778	113.452	0.912886	-0.10849
ankfy1	LL0000001003	ENSDARG00000061013	568480	123.162	174.45	165.997	168.523	129.55	163.332	0.993541	0.00687228
ankha	LL0000001004	ENSDARG00000071724	571148	39.0989	18.6211	18.5526	80.8121	47.109	56.7262	0.110609	-1.27545
ankhb	LL0000001005	ENSDARG00000014969	323738	232.638	206.792	215.796	435.597	322.893	534.986	0.0194148	-0.981195
ankhd1	LL0000001006	ENSDARG00000077860	563327	1845.47	1904.25	1747.85	970.731	1586	1260.69	0.218162	0.526189
ankib1a	LL0000001007	ENSDARG00000060768	566524	431.065	584.115	406.204	587.366	565.308	702.231	0.437954	-0.384067
ankib1b	LL0000001008	ENSDARG00000076829	561277	869.95	1536.73	813.384	625.801	619.287	728.638	0.13099	0.706157
ankk1	LL0000001009	ENSDARG00000056921	100170831	16.617	49.0029	144.515	125.16	46.1275	142.793	0.639595	-0.579791
ankle2	LL0000001010	ENSDARG00000035607	559297	173.99	232.274	183.573	236.523	211.009	272.872	0.633553	-0.28852
ankmy1	LL0000001011	ENSDARG00000062702	568987	19.5494	31.3619	57.6106	38.435	27.4802	14.6706	0.745044	0.429593
ankmy2a	LL0000001012	ENSDARG00000005948	334389	217.976	301.858	245.089	246.378	268.914	236.685	0.974386	0.0246173
ankra2	LL0000001014	ENSDARG00000035399	406403	288.354	358.701	306.606	277.915	303.264	566.284	0.700957	-0.266937
ankrd10a	LL0000001015	ENSDARG00000037100	393955	86.0176	254.815	185.526	408.988	298.357	291.455	0.115974	-0.924157
ankrd10b	LL0000001016	ENSDARG00000004771	559527	367.53	642.918	504.825	428.699	401.408	526.184	0.811717	0.159894
ankrd11	LL0000001017	ENSDARG00000051886	327352	10461.9	9193.92	8721.66	6609.84	9370.76	6887.34	0.505165	0.31142
ankrd12	LL0000001018	ENSDARG00000052419	393119	3618.6	2702.02	3157.84	2461.81	3892.38	2667.11	0.915181	0.0713187
ankrd13a	LL0000001019	ENSDARG00000061901	556837	264.895	396.924	363.24	206.958	305.227	308.082	0.59482	0.321508
ankrd13b	LL0000001020	ENSDARG00000014652	568981	45.9412	31.3619	13.6703	67.015	37.2946	33.2533	0.600574	-0.596509
ankrd13c	LL0000001021	ENSDARG00000103831	325167	790.775	1051.6	769.444	854.441	898.015	1000.53	0.904533	-0.0759525
ankrd13d	LL0000001022	ENSDARG00000098140	562931	68.4231	78.4046	88.8571	139.943	67.7192	175.069	0.324237	-0.699486
ankrd16	LL0000001023	ENSDARG00000003822	550225	43.9863	90.1653	80.069	50.2612	46.1275	71.3967	0.709031	0.352398
ankrd1a	LL0000001024	ENSDARG00000075263	100151027	24.4368	71.5442	50.7755	50.2612	85.385	60.6383	0.680631	-0.419593
ankrd1b	LL0000001025	ENSDARG00000076192	564159	0	3.92023	4.88226	4.92757	3.92575	7.8243	1	-0.922031
ankrd2	LL0000001026	ENSDARG00000002722	101886079	0	0	2.92935	9.85514	3.92575	2.93411	1	-2.51163
ankrd22	LL0000001027	ENSDARG00000002298	393244	108.499	54.8832	37.1052	52.2322	132.494	69.4407	0.753764	-0.342283
ankrd24	LL0000001028	ENSDARG00000062103	565326	83.0852	102.906	46.8697	92.6383	97.1623	69.4407	0.87847	-0.15484
ankrd27	LL0000001029	ENSDARG00000089207	386887	40.0764	131.328	88.8571	95.5949	40.2389	43.0336	0.592141	0.541151
ankrd28b	LL0000001030	ENSDARG00000009023	560747	643.177	753.665	682.54	491.771	689.95	578.998	0.652054	0.239979
ankrd29	LL0000001031	ENSDARG00000057159	553798	8.79725	6.86041	5.85871	46.3192	21.5916	55.7481	0.00700052	-2.52289
ankrd31	LL0000001032	ENSDARG00000052731	550610	6.84231	0	10.741	4.92757	8.83293	3.91215	1	-0.00710531
ankrd33aa	LL0000001033	ENSDARG00000055638	557568	81.1302	53.9032	124.009	238.494	279.71	108.562	0.0417384	-1.27466
ankrd33ab	LL0000001034	ENSDARG00000002508	569518	12.7071	9.80058	7.81161	71.9425	67.7192	33.2533	0.00165702	-2.5117
ankrd33ba	LL0000001035	ENSDARG00000058357	568270	70.378	119.567	104.48	196.117	73.6078	54.7701	0.905121	-0.140201
ankrd33bb	LL0000001036	ENSDARG00000015589	557905	44.9637	60.7636	81.0455	147.827	102.069	82.1551	0.21417	-0.830042
ankrd34a	LL0000001037		798097	9.77472	0	0	0	100.107	51.836	0.526742	-3.95823
ankrd34ba	LL0000001038	ENSDARG00000077086	560938	25.4143	25.4815	39.0581	53.2178	36.3132	34.2313	0.663948	-0.460185
ankrd34bb	LL0000001039	ENSDARG00000061641	565548	26.3918	113.687	86.9042	90.6673	105.995	82.1551	0.784043	-0.296765
ankrd37	LL0000001040	ENSDARG00000056376	793783	16.617	30.3818	15.6232	67.015	44.1647	43.0336	0.117135	-1.30023
ankrd39	LL0000001041	ENSDARG00000041350	100000333	33.2341	36.2621	17.5761	17.7393	14.7216	24.4509	0.616584	0.613351
ankrd40	LL0000001042	ENSDARG00000076490	100005118	269.782	421.425	286.1	269.045	201.195	291.455	0.548222	0.35958
ankrd44	LL0000001043	ENSDARG00000026028	561373	470.164	676.24	564.389	424.757	219.842	321.774	0.0805194	0.824031
ankrd45	LL0000001044	ENSDARG00000011326	553808	2.93242	0	0	18.7248	17.6659	37.1654	0.00304795	-4.6483
ankrd46a	LL0000001045	ENSDARG00000044328	100329397	631.447	839.91	521.425	419.829	368.039	533.03	0.20816	0.593244
ankrd46b	LL0000001046	ENSDARG00000015780	402888	117.297	185.231	193.337	157.682	124.643	207.344	0.984504	0.0181117
ankrd49	LL0000001047	ENSDARG00000023508	550246	57.6709	36.2621	56.6342	51.2467	66.7377	65.5285	0.766277	-0.285469
ANKRD50	LL0000001048	ENSDARG00000045666		562.047	840.89	550.719	431.655	404.352	385.347	0.114283	0.677692
ankrd50l	LL0000001049	ENSDARG00000007077	449857	193.54	230.314	205.055	110.378	134.457	177.025	0.288283	0.57602
ankrd52a	LL0000001050	ENSDARG00000036826	553206	2561.96	2342.34	2185.3	2260.77	2409.43	2327.73	0.975221	0.0187749
ankrd52b	LL0000001051		564614	12.7071	6.86041	0	8.86963	8.83293	0	1	0.144683
ankrd54	LL0000001052	ENSDARG00000055743	436851	170.08	467.488	301.723	291.712	305.227	362.852	0.973946	-0.0311735
ankrd55	LL0000001053	ENSDARG00000099182	100006755	64.5132	12.7408	50.7755	67.015	31.406	125.189	0.472169	-0.804493
ankrd63	LL0000001054		101885975	12.7071	6.86041	20.5055	18.7248	17.6659	8.80234	0.930804	-0.173215
ANKRD66	LL0000001055	ENSDARG00000090489	101886816	0	0	4.88226	1.97103	1.96287	11.7364	1	-1.6822
ankrd6a	LL0000001056	ENSDARG00000057790	100330565	25.4143	22.5413	23.4348	172.465	99.1251	18.5827	0.0239017	-2.02301
ankrd6b	LL0000001057	ENSDARG00000029370	378477	648.064	489.049	519.472	240.465	525.069	351.115	0.299941	0.569022
ankrd9	LL0000001058	ENSDARG00000028804	492328	36.1665	9.80058	23.4348	21.6813	41.2204	56.7262	0.505745	-0.785532
anks1aa	LL0000001059	ENSDARG00000062396	100334911	27.3692	10.7806	8.78806	6.8986	11.7772	1.95607	0.495858	1.18609
anks1ab	LL0000001060	ENSDARG00000078901	100003659	33.2341	13.7208	54.6813	203.016	103.051	209.3	0.00040247	-2.34205
anks1b	LL0000001061	ENSDARG00000003512	565408	1307.86	935.955	875.877	658.323	491.7	1005.42	0.322668	0.533405
anks3	LL0000001062	ENSDARG00000038557	100136846	122.184	164.65	155.256	112.349	146.234	65.5285	0.538062	0.447893
anks4b	LL0000001063	ENSDARG00000036846	431735	33.2341	45.0827	45.8932	130.088	85.385	111.496	0.0137828	-1.39636
ankzf1	LL0000001065	ENSDARG00000041904	553307	287.377	349.881	316.37	183.306	240.452	299.279	0.470997	0.39931
anln	LL0000001066	ENSDARG00000060917	562517	126.094	471.408	417.921	309.451	325.837	168.222	0.710533	0.337706
ano1	LL0000001067	ENSDARG00000102335	407698	687.163	637.038	377.887	176.407	89.3108	210.278	0.000166891	1.83826
ano10a	LL0000001068	ENSDARG00000057736	566425	652.952	1151.57	1062.38	290.727	561.382	513.47	0.0220008	1.06996
ano10b	LL0000001069	ENSDARG00000018159	565195	414.448	929.095	462.838	207.943	233.582	250.378	0.00312906	1.38444
ano11	LL0000001070	ENSDARG00000077327	100007289	29.3242	12.7408	18.5526	47.3047	43.1832	45.9678	0.177813	-1.17055
ano2	LL0000001071	ENSDARG00000101363	566373	58.6483	34.302	64.4458	366.611	155.067	154.53	0.000316391	-2.10296
ANO2_1_of_many	LL0000001072	ENSDARG00000003210		1.95494	0	0	15.7682	16.6844	5.86822	1	-4.2924
ano3	LL0000001073	ENSDARG00000058015	553392	204.292	203.852	171.855	397.162	319.948	270.916	0.083759	-0.76848
ano5a	LL0000001074	ENSDARG00000015731	100534737	900.252	1809.19	807.525	452.351	531.939	312.972	0.00240731	1.43887
ano5b	LL0000001075	ENSDARG00000036147	560102	1088.9	1177.05	1277.2	434.612	341.54	267.982	7.99034e-07	1.76276
ano6	LL0000001076	ENSDARG00000061544	100535437	54.7385	28.4217	38.0816	62.0874	67.7192	60.6383	0.424026	-0.65144
ANO7	LL0000001077	ENSDARG00000104834	556876	34.2115	12.7408	22.4584	25.6234	14.7216	7.8243	0.730192	0.527354
ano8a	LL0000001078	ENSDARG00000076265	562947	9.77472	22.5413	26.3642	90.6673	34.3503	39.1215	0.106015	-1.48387
ano8b	LL0000001079	ENSDARG00000077229	562782	143.688	194.051	117.174	507.54	396.501	590.735	3.19681e-05	-1.7163
ano9a	LL0000001080	ENSDARG00000078941	100126106	31.2791	48.0228	42.9639	57.1598	66.7377	49.8799	0.559637	-0.507225
ano9b	LL0000001081	ENSDARG00000079324	559809	35.189	37.2422	42.9639	57.1598	56.9233	141.815	0.125771	-1.14907
anos1a	LL0000001082	ENSDARG00000012896	30630	390.989	427.305	353.475	390.264	449.498	551.613	0.657118	-0.247847
anos1b	LL0000001083	ENSDARG00000004932	30652	372.417	890.873	653.246	262.147	286.58	200.498	0.00390998	1.35504
anp32a	LL0000001084	ENSDARG00000006487	335907	819.122	1179.01	973.522	1206.27	1102.15	1244.06	0.610067	-0.257567
anp32b	LL0000001085	ENSDARG00000023330	322000	1574.71	2612.83	2249.74	1592.59	2255.34	2229.93	0.904242	0.0828848
anp32e	LL0000001086	ENSDARG00000054804	406562	1483.8	2118.89	2049.57	3481.82	2168.98	1818.17	0.464156	-0.402075
ANPEP	LL0000001087	ENSDARG00000097285	100004744	35.189	57.8234	12.6939	11.8262	10.7958	7.8243	0.0975385	1.79579
anpepa	LL0000001088	ENSDARG00000041083	558452	9.77472	16.661	18.5526	14.7827	33.3689	54.7701	0.288762	-1.19408
anpepb	LL0000001089	ENSDARG00000103878	322533	14.6621	15.6809	12.6939	20.6958	18.6473	18.5827	0.770354	-0.428634
antxr1a	LL0000001090	ENSDARG00000025672	793153	146.621	140.148	81.0455	55.1888	55.9419	30.3192	0.0237196	1.37878
antxr1b	LL0000001091	ENSDARG00000074075	556289	223.841	269.516	198.22	97.5659	90.2922	52.814	0.00149687	1.52291
antxr1c	LL0000001092	ENSDARG00000063612	563907	3939.21	4037.84	3694.89	613.975	901.941	480.216	3.73309e-12	2.54777
antxr1d	LL0000001093	ENSDARG00000060845	563132	11.7297	27.4416	1.9529	16.7537	31.406	21.5168	0.64966	-0.760901
antxr2a	LL0000001094	ENSDARG00000104118	557239	4784.73	7759.12	4275.88	900.76	1541.84	1450.43	2.12163e-07	2.11118
antxr2b	LL0000001095	ENSDARG00000063011	560841	5.86483	4.90029	26.3642	15.7682	18.6473	5.86822	0.960444	-0.117374
ANXA1_1_of_many	LL0000001096	ENSDARG00000098481	550268	87.9725	93.1055	115.221	49.2757	102.069	222.014	0.745974	-0.333596
anxa11a	LL0000001097	ENSDARG00000077383	368215	2102.54	3064.64	2425.51	575.54	1252.31	1318.39	0.00467181	1.27097
anxa11b	LL0000001098	ENSDARG00000002632	353365	2480.82	4987.52	3688.06	1278.21	1218.94	1307.64	4.51285e-05	1.55198
anxa13	LL0000001099	ENSDARG00000013976	81880	2463.23	3251.83	2201.9	690.845	561.382	736.462	5.71838e-09	1.99312
anxa13l	LL0000001100	ENSDARG00000013613	554118	124.139	97.0257	88.8571	333.104	316.023	285.587	7.73289e-05	-1.59214
anxa1a	LL0000001101	ENSDARG00000026726	334724	2187.58	2304.12	2305.4	594.265	1109.02	1313.5	0.00521985	1.17189
anxa1b	LL0000001102	ENSDARG00000100095	353358	247.301	249.915	373.004	181.335	272.84	803.947	0.532493	-0.531845
anxa1c	LL0000001103	ENSDARG00000104359	494158	70.378	84.285	159.162	74.8991	102.069	261.136	0.61714	-0.481365
anxa2a	LL0000001104	ENSDARG00000003216	325557	1712.53	1964.04	1471.51	883.021	2012.93	2101.8	0.960296	0.0427469
anxa2b	LL0000001105	ENSDARG00000053625	799806	17.5945	4.90029	0	19.7103	18.6473	207.344	0.0144099	-3.44931
anxa3a	LL0000001106	ENSDARG00000009196	447893	44.9637	22.5413	74.2103	29.5654	62.812	231.795	0.254531	-1.19379
anxa3b	LL0000001107	ENSDARG00000044254	492336	745.811	1431.86	1074.1	411.945	432.814	369.698	0.000314664	1.42092
anxa4	LL0000001108	ENSDARG00000036456	353362	2087.88	2952.91	2259.51	614.961	1223.85	1287.1	0.00451791	1.22367
anxa5a	LL0000001109	ENSDARG00000026406	557578	78.1978	43.1226	23.4348	52.2322	139.364	98.7818	0.234832	-1.00437
anxa5b	LL0000001110	ENSDARG00000016470	337132	1265.83	2368.8	1727.34	963.833	941.198	1341.87	0.111663	0.723692
anxa6	LL0000001111	ENSDARG00000013335	353363	115.342	152.889	65.4222	46.3192	112.865	78.243	0.574619	0.490778
aoc1	LL0000001112	ENSDARG00000061355	555401	25.4143	10.7806	34.1758	43.3626	23.5545	44.9897	0.569556	-0.669141
aoc2	LL0000001113	ENSDARG00000014646	541429	8809.96	9463.44	11504.6	906.673	1982.5	2130.17	1.04021e-09	2.56867
aox5	LL0000001114	ENSDARG00000071475	64265	22.4819	15.6809	43.9403	33.5075	30.4245	106.606	0.317834	-1.05461
aox6	LL0000001115	ENSDARG00000020054	570457	428.133	572.354	353.475	197.103	229.656	135.947	0.00402093	1.26675
ap1ar	LL0000001116	ENSDARG00000031496	100332265	172.035	179.351	181.62	284.814	203.157	240.597	0.39071	-0.450895
ap1b1	LL0000001117	ENSDARG00000020621	562166	694.983	1107.47	964.734	1015.08	990.27	1180.49	0.721909	-0.203263
ap1g1	LL0000001118	ENSDARG00000102394	324466	2195.4	2099.28	1719.53	1369.86	1931.47	2196.67	0.834108	0.129462
ap1g2	LL0000001119	ENSDARG00000054337	100007877	205.269	393.003	316.37	268.06	269.895	391.215	0.979155	-0.0227668
ap1m1	LL0000001120	ENSDARG00000096249	100330411	1042.96	1375.02	1270.36	744.063	866.609	1035.74	0.269585	0.478924
ap1m2	LL0000001121	ENSDARG00000096454	403021	51.806	40.1824	57.6106	147.827	171.751	225.927	0.000121415	-1.86648
ap1m3	LL0000001122	ENSDARG00000039512	445244	41.0538	43.1226	78.1161	135.015	156.048	388.281	0.000882339	-2.06555
ap1s1	LL0000001123	ENSDARG00000056803	393279	157.373	158.769	154.279	274.958	188.436	422.512	0.0785313	-0.913226
ap1s2	LL0000001124	ENSDARG00000058504	327237	446.705	1318.18	982.31	540.062	699.765	736.462	0.466123	0.475154
ap1s3a	LL0000001125	ENSDARG00000110439	550415	19.5494	4.90029	7.81161	17.7393	16.6844	30.3192	0.482894	-1.00491
ap1s3b	LL0000001126	ENSDARG00000027966	447897	48.8736	6.86041	26.3642	83.7687	154.086	254.29	0.00104429	-2.58359
ap2a1	LL0000001127	ENSDARG00000054320	558153	1325.45	1735.68	1404.14	929.34	1213.06	1412.29	0.511567	0.329016
ap2b1	LL0000001128	ENSDARG00000035152	334632	1024.39	1966.98	1776.17	1160.94	1039.34	1271.45	0.371092	0.457587
ap2m1a	LL0000001129	ENSDARG00000002790	321051	3291.15	4711.14	3381.45	2203.61	2487.94	3070.06	0.188968	0.552542
ap2m1b	LL0000001130	ENSDARG00000033899	394001	1821.03	2598.13	1768.35	1515.72	1809.77	3187.42	0.926984	-0.0739503
ap2s1	LL0000001131	ENSDARG00000026967	100148085	1260.94	1687.66	1327	856.412	1098.23	1692.98	0.718763	0.229156
ap3b1a	LL0000001132	ENSDARG00000100082	563316	190.607	191.111	139.633	94.6093	115.81	55.7481	0.0859862	0.969976
AP3B2	LL0000001133	ENSDARG00000105296	100000165	32.2566	3.92023	4.88226	145.856	103.051	194.629	5.73618e-05	-3.43318
ap3d1	LL0000001134	ENSDARG00000071424	563359	282.49	253.835	221.654	239.48	272.84	260.158	0.970745	-0.0273458
ap3m1	LL0000001135	ENSDARG00000029928	266798	241.436	468.468	343.711	118.262	152.123	173.113	0.00753946	1.2483
ap3m2	LL0000001136	ENSDARG00000016128	415244	79.1753	155.829	110.339	356.756	334.67	551.613	6.92813e-05	-1.84782
ap3s1	LL0000039760		449791	216.021	132.308	135.727	92.6383	135.438	133.991	0.540142	0.418879
ap3s2	LL0000001138	ENSDARG00000039882	436812	270.76	247.955	201.149	256.234	236.526	336.445	0.7543	-0.204032
ap4b1	LL0000001139	ENSDARG00000013726	393309	109.477	111.727	100.574	98.5514	86.3665	54.7701	0.561719	0.424993
ap4e1	LL0000001140	ENSDARG00000103684	570467	82.1077	245.015	119.127	106.436	129.55	107.584	0.658594	0.37721
ap4m1	LL0000001141	ENSDARG00000056871	436945	81.1302	84.285	74.2103	75.8846	66.7377	84.1112	0.933859	0.0797565
ap4s1	LL0000001142	ENSDARG00000054220	368852	205.269	206.792	169.903	69.9715	116.791	202.454	0.409726	0.580258
ap5b1	LL0000001143	ENSDARG00000078805	100148772	83.0852	91.1454	64.4458	115.305	100.107	103.672	0.546628	-0.41889
ap5m1	LL0000001144	ENSDARG00000031533	553681	52.7835	128.388	91.7864	52.2322	60.8491	100.738	0.712162	0.352168
ap5s1	LL0000001145	ENSDARG00000076755	556111	71.3555	98.9859	124.986	67.015	95.1994	89.9794	0.79335	0.227748
ap5z1	LL0000001146	ENSDARG00000078111	100537934	31.2791	90.1653	49.799	61.1019	67.7192	60.6383	0.900165	-0.145903
apaf1	LL0000001147	ENSDARG00000021239	58131	366.552	274.416	257.783	141.914	210.028	171.157	0.0988691	0.780822
apba1a	LL0000001148	ENSDARG00000103848	100003938	135.869	68.6041	87.8806	249.335	173.714	398.061	0.00636722	-1.48986
apba1b	LL0000001149	ENSDARG00000074328	565507	64.5132	99.9659	92.7629	657.338	381.779	339.379	1.39362e-07	-2.42189
apba2a	LL0000001150	ENSDARG00000063314	100330365	98.7247	99.9659	103.504	157.682	122.68	173.113	0.298192	-0.585551
apba2b	LL0000001151	ENSDARG00000060639	327160	59.6258	77.4246	52.7284	533.163	217.879	640.614	4.86016e-08	-2.87445
APBA3	LL0000001152	ENSDARG00000090675	449850	14.6621	4.90029	11.7174	38.435	0	29.3411	0.584342	-1.11543
apbb1	LL0000001153	ENSDARG00000076560	565164	659.794	987.898	872.948	794.324	606.528	854.805	0.795908	0.160237
apbb1ip	LL0000001154	ENSDARG00000016505	393607	22.4819	7.84046	12.6939	45.3336	51.0347	44.0117	0.0467795	-1.70628
apbb2b	LL0000001155	ENSDARG00000099995	564990	2813.17	3270.45	2460.66	774.614	1117.86	1140.39	1.69165e-05	1.49427
apbb3	LL0000001156	ENSDARG00000053771	101883158	19.5494	10.7806	16.5997	62.0874	57.9048	60.6383	0.00642062	-1.94436
apc	LL0000001157	ENSDARG00000058868	386762	1045.9	1099.63	1004.77	2290.33	1583.06	2528.23	0.00463855	-1.02295
apc2	LL0000001158	ENSDARG00000063007	565771	35.189	16.661	9.76451	214.842	76.5521	118.343	0.000166386	-2.73332
apcdd1l	LL0000001159	ENSDARG00000075557	100001408	180.832	333.22	255.83	171.479	146.234	110.518	0.106696	0.846281
apeh	LL0000001160	ENSDARG00000008703	100333019	135.869	280.297	263.642	165.566	256.155	153.552	0.76498	0.240873
apela	LL0000001161	ENSDARG00000094729	100536023	58.6483	28.4217	84.9513	18.7248	20.6102	31.2972	0.136852	1.28411
apex1	LL0000001162	ENSDARG00000045843	406730	195.494	328.319	409.133	496.699	552.549	825.464	0.0392354	-1.00681
apex2	LL0000001163	ENSDARG00000008472	393115	204.292	208.752	165.02	183.306	183.529	208.322	0.992093	0.00725145
aph1b	LL0000001164	ENSDARG00000005612	386808	492.646	485.129	466.744	438.554	479.923	612.251	0.897067	-0.0836474
api5	LL0000001165	ENSDARG00000033597	321676	563.024	950.656	915.911	733.222	840.11	784.386	0.953985	0.0433182
apip	LL0000001166	ENSDARG00000003132	447941	401.741	309.698	310.512	194.146	344.484	401.973	0.880943	0.119631
apln	LL0000001167	ENSDARG00000053279	798375	4415.24	4808.16	4098.17	1540.36	1877.49	1956.07	2.75128e-05	1.30971
aplnr2	LL0000001168	ENSDARG00000004447	793710	17.5945	13.7208	39.0581	47.3047	23.5545	52.814	0.462779	-0.813339
aplnra	LL0000001169	ENSDARG00000002172	561935	905.139	1209.39	908.1	329.162	537.828	389.259	0.00105869	1.26667
aplnrb	LL0000001170	ENSDARG00000036670	565492	25.4143	49.0029	41.9874	93.6238	102.069	108.562	0.019958	-1.38619
aplp1	LL0000001171	ENSDARG00000098368	404233	210.157	340.08	410.11	1682.27	778.28	1765.36	5.47683e-06	-2.13763
aplp2	LL0000001172	ENSDARG00000054864	796801	2715.42	1868.97	1846.47	2130.68	2091.44	2166.35	0.987936	0.00954041
apmap	LL0000001173	ENSDARG00000017422	266637	272.715	500.81	471.626	430.67	397.482	447.941	0.96451	-0.0354196
apnl	LL0000001174	ENSDARG00000090900	100002992	1.95494	10.7806	15.6232	13.7972	14.7216	31.2972	0.499074	-1.07683
apoa1a	LL0000001175	ENSDARG00000012076	30355	38.1214	10.7806	8.78806	12.8117	124.643	984.884	0.0485368	-4.28202
apoa1b	LL0000001176	ENSDARG00000101324	100101640	753.631	60.7636	1263.53	522.322	1204.22	3588.42	0.506305	-1.35491
apoa2	LL0000001177	ENSDARG00000015866	322327	397.831	15.6809	684.492	272.002	631.064	2225.04	0.514931	-1.51039
apoa4a	LL0000001178	ENSDARG00000101160	550608	4.88736	10.7806	8.78806	13.7972	41.2204	15.6486	0.23583	-1.53092
apoa4b.1	LL0000001179	ENSDARG00000040298	322543	23.4593	0	47.8461	24.6378	97.1623	577.042	0.266662	-3.29284
apoa4b.2	LL0000001180	ENSDARG00000094929	570354	12.7071	4.90029	17.5761	22.6668	73.6078	477.282	0.000178514	-4.02685
apoba	LL0000001181	ENSDARG00000042780	566465	30.3016	31.3619	57.6106	120.233	80.4778	120.299	0.0212736	-1.42826
apobb.1	LL0000001182	ENSDARG00000022767	321166	52.7835	42.1425	114.245	139.943	154.086	571.174	0.00494195	-2.04835
apobb.2	LL0000001183	ENSDARG00000075016	100330435	25.4143	33.322	29.2935	46.3192	38.276	28.3631	0.748032	-0.359656
apobec2a	LL0000001184	ENSDARG00000018881	503736	2.93242	3.92023	23.4348	20.6958	17.6659	11.7364	0.703336	-0.725776
apobec2b	LL0000001185	ENSDARG00000113992	567047	4.88736	37.2422	28.3171	7.88411	21.5916	14.6706	0.681777	0.674091
apoc1	LL0000001186	ENSDARG00000092170	570638	175.945	16.661	212.866	170.494	463.238	1430.87	0.167568	-2.34817
apoc2	LL0000001187	ENSDARG00000092155	568972	21.5044	18.6211	34.1758	68.986	75.5707	302.214	0.000829105	-2.58807
apoc4	LL0000001188	ENSDARG00000075614	570390	7.81978	0	0.976451	2.95654	3.92575	11.7364	1	-1.08185
apoda.1	LL0000001189	ENSDARG00000060345	767642	19.5494	21.5613	22.4584	22.6668	48.0904	79.221	0.178037	-1.23849
apoda.2	LL0000001190	ENSDARG00000060350	100148022	0	0.980058	0	23.6523	8.83293	86.0673	5.33937e-05	-6.8175
apodb	LL0000001191	ENSDARG00000057437	567972	81.1302	25.4815	101.551	32.522	53.979	258.202	0.558253	-0.727681
apoea	LL0000001192	ENSDARG00000102004	553587	36.1665	1.96012	11.7174	16.7537	30.4245	131.057	0.170808	-1.83829
apoeb	LL0000001193	ENSDARG00000040295	30314	1873.81	2226.69	1801.55	2734.8	6762.1	10776	0.00053062	-1.78027
apof	LL0000001194	ENSDARG00000090980	793418	5728.97	5347.2	3701.73	141.914	246.341	634.746	1.89632e-11	3.85251
apol1	LL0000001195	ENSDARG00000007425	560340	258.053	335.18	327.111	91.6528	112.865	141.815	0.000901368	1.40994
apom	LL0000001196	ENSDARG00000076838	569714	29.3242	0	29.2935	6.8986	20.6102	49.8799	0.864259	-0.400827
apooa	LL0000001197	ENSDARG00000104696	641319	71.3555	34.302	60.54	61.1019	144.271	117.364	0.186766	-0.957463
apoob	LL0000001198	ENSDARG00000026444	449837	136.846	401.824	176.738	178.378	79.4964	175.069	0.339894	0.72457
apool	LL0000001199	ENSDARG00000039374	541537	148.576	180.331	186.502	113.334	115.81	176.047	0.600846	0.34706
apopt1	LL0000001200	ENSDARG00000092473	798687	220.909	147.009	197.243	110.378	167.826	182.893	0.676145	0.293557
appa	LL0000001201	ENSDARG00000104279	58083	3596.12	3516.45	2980.13	4875.34	4102.41	5121	0.207858	-0.482256
appb	LL0000001202	ENSDARG00000055543	170846	5958.67	5757.84	5224.99	2734.8	2807.89	4230.99	0.0351455	0.793584
appbp2	LL0000001203	ENSDARG00000007566	322995	2590.3	3154.81	2420.62	1588.65	1816.64	1530.63	0.0389732	0.726263
appl1	LL0000001204		571540	25.4143	75.4645	49.799	73.9135	34.3503	21.5168	0.877625	0.215515
appl2	LL0000001205	ENSDARG00000100151	100000135	782.955	895.773	683.516	604.12	771.41	757.001	0.80064	0.147579
aprt	LL0000001206	ENSDARG00000003519	393641	120.229	182.291	249.972	89.6818	231.619	220.058	0.978528	0.0293256
aptx	LL0000001207	ENSDARG00000027143	405797	41.0538	80.3648	41.9874	60.1164	36.3132	31.2972	0.74278	0.355469
aqp10a	LL0000001208	ENSDARG00000007086	436621	3.90989	0	2.92935	10.8407	11.7772	9.78037	1	-2.24358
aqp10b	LL0000001209	ENSDARG00000058678	100034395	1.95494	4.90029	6.83516	24.6378	17.6659	3.91215	0.301456	-1.755
aqp11	LL0000001210	ENSDARG00000100555	553476	571.821	709.562	407.18	233.567	200.213	222.993	0.000660051	1.36233
aqp12	LL0000001211	ENSDARG00000043279	436844	41.0538	12.7408	34.1758	25.6234	28.4617	56.7262	0.807749	-0.333053
aqp1a.1	LL0000001212	ENSDARG00000023713	335821	126.094	85.265	98.6216	757.86	534.883	1446.52	1.41109e-10	-3.14353
aqp1a.2	LL0000001213	ENSDARG00000091027	559284	14.6621	1.96012	9.76451	6.8986	34.3503	88.0234	0.0811887	-2.29249
aqp3a	LL0000001214	ENSDARG00000003808	406777	7469.84	10847.3	8744.12	864.296	1960.91	3123.85	1.1261e-05	2.18549
aqp3b	LL0000001215	ENSDARG00000069518	568049	2.93242	3.92023	9.76451	14.7827	7.8515	10.7584	0.601693	-1.00663
aqp4	LL0000001216	ENSDARG00000010565	445293	15.6396	12.7408	20.5055	68.986	59.8677	21.5168	0.0716746	-1.62086
aqp7	LL0000001217	ENSDARG00000026787	334529	30.3016	49.0029	15.6232	34.493	7.8515	21.5168	0.687986	0.571947
aqp8a.1	LL0000001218	ENSDARG00000045141	447923	70.378	15.6809	12.6939	21.6813	52.9976	126.167	0.414185	-1.02426
aqp8a.2	LL0000001219	ENSDARG00000071592	563130	0	1.96012	2.92935	9.85514	18.6473	53.7921	0.00582049	-4.07311
aqp8b	LL0000001220	ENSDARG00000089749	555598	2.93242	0	5.85871	14.7827	7.8515	16.6266	1	-2.15853
aqp9b	LL0000001222	ENSDARG00000053480	570191	172.035	528.251	331.993	3555.73	910.774	194.629	0.170322	-2.17484
aqr	LL0000001223	ENSDARG00000016775	393436	253.165	220.513	259.736	198.088	351.354	183.871	0.999681	0.000205957
ar	LL0000001224	ENSDARG00000067976	100005148	772.203	688.001	523.378	289.741	332.707	342.313	0.00602007	1.03985
araf	LL0000001225	ENSDARG00000054533	403063	845.514	1361.3	1416.83	642.555	719.393	689.516	0.0423363	0.820784
arap1	LL0000001226		101883993	0	1.96012	8.78806	2.95654	6.87006	0	1	0.129598
arap1a	LL0000001227	ENSDARG00000062221	571767	40.0764	28.4217	41.9874	32.522	33.3689	58.6822	0.88836	-0.173206
arap3	LL0000001228	ENSDARG00000076801	558931	370.462	642.918	407.18	170.494	146.234	117.364	6.54911e-05	1.71042
arcn1a	LL0000001229	ENSDARG00000002792	266982	331.363	462.587	353.475	258.205	259.099	389.259	0.561325	0.339884
arcn1b	LL0000001230	ENSDARG00000031214	399661	710.622	1585.73	1223.49	527.25	518.199	583.888	0.0107314	1.11122
areg	LL0000001231	ENSDARG00000076853	101884611	15.6396	12.7408	19.529	88.6963	57.9048	75.3089	0.000905189	-2.21148
AREL1	LL0000001232	ENSDARG00000100359	100332031	67.4456	194.051	148.421	167.537	135.438	151.596	0.877363	-0.149187
arf1	LL0000001233	ENSDARG00000009484	114428	1717.42	1760.18	1394.37	653.396	1079.58	848.936	0.0178372	0.916058
arf2a	LL0000001234	ENSDARG00000014763	399477	3871.77	5243.31	4053.25	2513.06	2982.59	3646.12	0.207858	0.526523
arf2b	LL0000001235	ENSDARG00000016393	327026	1216.95	1535.75	1435.38	1041.69	1386.77	1158.97	0.66452	0.223336
arf3a	LL0000001236	ENSDARG00000070539	445047	5.86483	1.96012	2.92935	79.8266	51.0347	162.354	3.74904e-08	-4.76878
arf3b	LL0000001237	ENSDARG00000036998	368822	0	0	0	11.8262	8.83293	1.95607	1	-5.3889
arf4a	LL0000001238	ENSDARG00000103858	445196	412.493	527.271	502.872	199.074	300.32	229.839	0.0155993	0.984242
arf4b	LL0000001239	ENSDARG00000100339	550402	34.2115	66.6439	49.799	18.7248	87.3479	5.86822	0.789668	0.428513
arf5	LL0000001240	ENSDARG00000070472	378724	2647	3604.65	2966.46	1505.87	2143.46	1846.53	0.04768	0.746122
ARF5_1_of_many	LL0000001241	ENSDARG00000074210	550265	43.9863	46.0627	47.8461	40.4061	65.7563	60.6383	0.781038	-0.274618
arf6a	LL0000001242	ENSDARG00000101626	336063	1139.73	1080.02	992.075	518.38	875.442	711.033	0.158235	0.609664
arf6b	LL0000001243	ENSDARG00000052928	100003206	1080.11	1395.6	979.381	542.033	832.259	980.971	0.257709	0.552816
arfgap1	LL0000001244	ENSDARG00000101616	100149572	425.2	402.804	372.028	222.726	335.651	433.271	0.664074	0.275134
arfgap2	LL0000001245	ENSDARG00000067601	641490	1142.67	1372.08	1122.92	791.368	942.18	643.549	0.129225	0.613817
arfgap3	LL0000001246	ENSDARG00000097583	402889	130.004	151.909	164.044	126.146	164.881	222.014	0.789382	-0.202225
arfgef1	LL0000001247	ENSDARG00000063474	100329953	698.893	778.166	865.136	783.484	793.983	888.058	0.902829	-0.0740364
arfgef2	LL0000001248	ENSDARG00000074702	100334572	732.127	967.317	647.387	559.772	509.366	476.304	0.153489	0.602696
arfgef3	LL0000001249	ENSDARG00000077656	562652	77.2203	22.5413	41.9874	123.189	76.5521	107.584	0.135926	-1.11635
arfip1	LL0000001250	ENSDARG00000070055	100003895	353.845	819.329	544.86	275.944	319.948	392.193	0.123923	0.798024
arfip2a	LL0000001251	ENSDARG00000059244	449664	219.931	512.57	363.24	376.466	204.139	175.069	0.439881	0.536105
arfip2b	LL0000001252	ENSDARG00000056664	550342	22.4819	0	3.90581	0.985514	0.981437	0.978037	1	3.16358
arfrp1	LL0000001253	ENSDARG00000057857	503602	487.759	442.006	420.851	281.857	371.965	360.896	0.386531	0.41252
arg1	LL0000001254	ENSDARG00000057429	570368	43.9863	19.6012	20.5055	47.3047	51.0347	30.3192	0.568707	-0.613404
arg2	LL0000001255	ENSDARG00000039269	322614	498.511	272.456	288.053	408.988	820.481	205.388	0.602431	-0.438165
arglu1a	LL0000001256	ENSDARG00000019223	406834	1990.13	2020.88	1398.28	2103.09	1868.66	2943.89	0.494343	-0.354427
arglu1b	LL0000001257	ENSDARG00000018319	393131	844.536	872.252	812.408	1350.15	842.073	1388.81	0.274184	-0.501701
arhgap1	LL0000001258	ENSDARG00000024324	550478	1066.42	1420.1	1105.34	844.585	977.511	1449.45	0.838577	0.134747
arhgap10	LL0000001259	ENSDARG00000078326	692277	418.358	550.793	481.391	258.205	273.821	275.807	0.0278717	0.844452
arhgap11a	LL0000001260	ENSDARG00000100019	406608	121.207	277.356	193.337	236.523	303.264	174.091	0.731983	-0.270329
arhgap12a	LL0000001261	ENSDARG00000008548	563267	103.612	117.607	157.209	280.871	374.909	251.356	0.0045477	-1.26128
arhgap12b	LL0000001262	ENSDARG00000026482	393848	251.21	346.941	210.914	676.063	528.995	487.063	0.0109074	-1.06451
arhgap15	LL0000001263	ENSDARG00000062349	100003547	5.86483	13.7208	13.6703	26.6089	41.2204	78.243	0.0204116	-2.13515
arhgap17a	LL0000001264	ENSDARG00000020488	550254	449.637	581.174	396.439	178.378	220.823	232.773	0.00303022	1.17526
arhgap17b	LL0000001265	ENSDARG00000062263	100141341	288.354	367.522	225.56	52.2322	53.979	96.8257	1.24121e-05	2.11797
arhgap18	LL0000001266	ENSDARG00000074740	100004252	124.139	36.2621	84.9513	99.5369	92.2551	36.1874	0.936154	0.106066
arhgap19	LL0000001267	ENSDARG00000083189	100537002	208.202	223.453	210.914	220.755	359.206	256.246	0.508142	-0.380024
arhgap20	LL0000001268	ENSDARG00000089326	796434	110.454	69.5841	96.6687	272.002	160.956	122.255	0.0883842	-1.0046
arhgap20b	LL0000001269	ENSDARG00000093708	100002649	465.277	488.069	608.329	142.9	234.563	104.65	0.000172202	1.69567
arhgap21a	LL0000001270	ENSDARG00000104295	556095	1639.22	1780.77	1324.07	1047.6	1135.52	1261.67	0.264784	0.461696
arhgap21b	LL0000001271	ENSDARG00000075673	326745	574.754	771.306	641.529	607.077	753.744	892.948	0.761174	-0.181338
arhgap22	LL0000001272	ENSDARG00000021255	562503	104.59	31.3619	51.7519	120.233	93.2365	173.113	0.157833	-1.0423
ARHGAP22_1_of_many	LL0000001273	ENSDARG00000076434	555573	145.643	69.5841	84.9513	479.945	376.872	689.516	6.7051e-07	-2.36494
arhgap23a	LL0000001274	ENSDARG00000052950	100006233	936.419	1181.95	911.029	799.252	1130.62	1308.61	0.886612	-0.0963006
arhgap23b	LL0000001275	ENSDARG00000026840	562244	49.8511	3.92023	9.76451	139.943	97.1623	24.4509	0.072639	-2.04135
arhgap24	LL0000001276	ENSDARG00000100973	100005116	247.301	242.074	258.76	176.407	173.714	203.432	0.388819	0.434561
arhgap25	LL0000001277	ENSDARG00000061784	562468	25.4143	4.90029	18.5526	14.7827	27.4802	38.1435	0.621717	-0.718451
arhgap27	LL0000001278	ENSDARG00000104255	564211	45.9412	66.6439	118.151	205.972	141.327	241.575	0.0203944	-1.35169
arhgap27l	LL0000001279	ENSDARG00000061798	566523	105.567	195.032	240.207	115.305	216.898	363.83	0.680111	-0.36409
arhgap28	LL0000001280	ENSDARG00000101350	492794	28.3467	62.7237	46.8697	24.6378	26.4988	7.8243	0.21618	1.22639
arhgap29a	LL0000001281	ENSDARG00000026329	564805	476.029	706.622	541.931	157.682	136.42	135.947	8.59652e-08	2.00369
arhgap29b	LL0000001282	ENSDARG00000017748	378998	656.861	914.394	821.196	335.075	450.48	562.371	0.0516005	0.82772
arhgap31	LL0000001283	ENSDARG00000059472	101885883	3328.29	4432.8	4005.4	804.179	1174.78	579.976	1.41124e-08	2.20108
arhgap32a	LL0000001284	ENSDARG00000075334	562449	79.1753	43.1226	51.7519	208.929	163.9	285.587	0.000157503	-1.91949
arhgap32b	LL0000001285	ENSDARG00000074184	569434	589.416	1431.86	837.795	1008.18	879.368	1032.81	0.97156	-0.0306022
arhgap33	LL0000001286	ENSDARG00000011333	569720	284.444	410.644	464.791	572.584	699.765	574.108	0.130241	-0.670783
arhgap35a	LL0000001287	ENSDARG00000062577	100004299	1054.69	1801.35	1496.9	952.007	882.312	922.289	0.113739	0.659095
arhgap35b	LL0000001288	ENSDARG00000060297	564565	517.083	733.083	556.577	786.44	551.568	988.796	0.516159	-0.36497
arhgap36	LL0000001289	ENSDARG00000059672	559813	520.015	489.049	487.249	166.552	216.898	153.552	6.46569e-05	1.47842
arhgap39	LL0000001290	ENSDARG00000100007	101884459	41.0538	12.7408	35.1523	128.117	102.069	126.167	0.00173554	-2.00216
arhgap42a	LL0000001291	ENSDARG00000056619	566275	1374.33	1747.44	1338.71	362.669	303.264	308.082	3.42045e-11	2.1952
arhgap42b	LL0000001292	ENSDARG00000010654	569534	123.162	78.4046	84.9513	62.0874	47.109	35.2093	0.131603	0.988629
arhgap44	LL0000001293	ENSDARG00000104549	100333556	13.6846	7.84046	13.6703	32.522	40.2389	31.2972	0.0957805	-1.56381
arhgap4a	LL0000001294	ENSDARG00000039265	393416	30.3016	13.7208	30.27	27.5944	69.682	87.0453	0.140159	-1.31095
arhgap4b	LL0000001295	ENSDARG00000015003	561231	162.26	111.727	168.926	285.799	331.726	409.798	0.00490041	-1.21379
arhgap5	LL0000001296	ENSDARG00000061294	795752	1419.29	1631.8	1526.19	723.367	956.901	944.784	0.0234684	0.802134
ARHGAP6	LL0000001297	ENSDARG00000111170	101882360	115.342	60.7636	75.1868	19.7103	50.0533	14.6706	0.0459674	1.57351
arhgdia	LL0000001298	ENSDARG00000043795	406770	2508.19	2847.07	3599.2	1204.3	2749.01	3316.52	0.667882	0.300681
arhgdig	LL0000001299	ENSDARG00000004034	394132	1056.65	446.906	759.679	882.035	1114.91	2076.37	0.142847	-0.847823
arhgef10	LL0000001300	ENSDARG00000077788	334278	282.49	485.129	364.216	157.682	168.807	127.145	0.00216289	1.31908
arhgef10la	LL0000001301	ENSDARG00000088630	799435	296.174	500.81	515.566	527.25	367.057	488.041	0.923649	-0.0747457
arhgef10lb	LL0000001302	ENSDARG00000074244	567649	23.4593	19.6012	12.6939	52.2322	53.979	62.5944	0.0307955	-1.59828
arhgef11	LL0000001303	ENSDARG00000052482	565268	415.426	414.565	451.121	676.063	617.324	709.077	0.0864829	-0.64438
arhgef12a	LL0000001304	ENSDARG00000030532	562455	730.172	756.605	745.032	345.915	509.366	391.215	0.0274528	0.840327
arhgef12b	LL0000001305	ENSDARG00000100913	571031	844.536	1130.99	1166.86	492.757	675.229	578.02	0.0270318	0.847793
arhgef15	LL0000001306	ENSDARG00000100293	101882903	47.8961	24.5015	37.1052	119.247	56.9233	29.3411	0.344158	-0.908088
arhgef16	LL0000001307	ENSDARG00000077114	567180	53.761	30.3818	53.7048	69.9715	168.807	203.432	0.00893219	-1.68166
ARHGEF17	LL0000001308	ENSDARG00000101644	100002227	1749.68	1494.59	942.276	396.177	466.183	454.787	1.25752e-05	1.66833
arhgef18a	LL0000001309	ENSDARG00000011157	407987	85.0401	90.1653	98.6216	143.885	201.195	230.817	0.0266674	-1.07258
arhgef18b	LL0000001310	ENSDARG00000042308	562264	152.486	294.997	252.901	251.306	279.71	242.553	0.85026	-0.143394
arhgef19	LL0000001311	ENSDARG00000078853	569202	3.90989	1.96012	2.92935	14.7827	24.5359	4.89019	0.154923	-2.32864
arhgef1a	LL0000001312	ENSDARG00000040380	368266	415.426	769.346	383.745	186.262	244.378	270.916	0.014302	1.16073
arhgef1b	LL0000001313	ENSDARG00000055837	557983	4196.29	6944.69	4370.6	1604.42	1491.78	1239.17	3.78236e-07	1.83912
arhgef2	LL0000001314	ENSDARG00000075819	561276	570.844	1090.8	1141.47	1122.5	1019.71	1184.4	0.693833	-0.247024
arhgef25b	LL0000001315	ENSDARG00000014465	569561	39.0989	30.3818	22.4584	240.465	126.605	194.629	1.1467e-06	-2.61105
arhgef28	LL0000001316	ENSDARG00000060415	559941	137.824	221.493	155.256	149.798	149.178	67.4846	0.503568	0.489765
arhgef3	LL0000001317	ENSDARG00000013834	570228	16.617	13.7208	30.27	57.1598	31.406	18.5827	0.483904	-0.821799
arhgef33	LL0000001318	ENSDARG00000097964	559216	48.8736	19.6012	75.1868	53.2178	50.0533	175.069	0.339839	-0.954185
arhgef37	LL0000001319	ENSDARG00000002463	101883655	166.17	247.955	194.314	189.219	198.25	152.574	0.809254	0.172044
arhgef38	LL0000001320	ENSDARG00000079377	100317614	5.86483	22.5413	25.3877	57.1598	41.2204	107.584	0.0272133	-1.93695
arhgef39	LL0000001321	ENSDARG00000013476	492469	54.7385	144.069	69.328	74.8991	79.4964	58.6822	0.728267	0.331558
arhgef3l	LL0000001322	ENSDARG00000037554	553761	39.0989	10.7806	27.3406	27.5944	34.3503	105.628	0.304863	-1.11778
arhgef4	LL0000001323	ENSDARG00000012914	559017	1989.16	1838.59	1475.42	1062.38	1164.97	1551.17	0.267088	0.489024
arhgef40	LL0000001324	ENSDARG00000078979	100151026	145.643	99.9659	122.056	73.9135	77.5335	22.4949	0.136852	1.07993
arhgef5	LL0000001325		100537160	130.004	135.248	199.196	151.769	292.468	512.492	0.0933518	-1.04262
arhgef6	LL0000001326	ENSDARG00000006683	558288	870.928	1639.64	1114.13	434.612	645.786	713.967	0.0227784	1.01437
arhgef7a	LL0000001327	ENSDARG00000006299	553493	257.075	468.468	319.3	716.469	408.278	693.429	0.113128	-0.799216
arhgef7b	LL0000001328	ENSDARG00000073848	494081	822.054	1670.02	1175.65	650.439	597.695	635.724	0.0232172	0.96119
arhgef9a	LL0000001329	ENSDARG00000061746	559868	59.6258	40.1824	80.069	168.523	100.107	232.773	0.0127925	-1.47892
arhgef9b	LL0000001330	ENSDARG00000078624	560923	45.9412	19.6012	33.1993	138.957	103.051	283.631	0.000153818	-2.41231
arid1aa	LL0000001331	ENSDARG00000101710	100141358	1483.8	1916.01	1810.34	1629.05	1777.38	1668.53	0.952404	0.0379267
arid1ab	LL0000001332	ENSDARG00000101891	568161	1716.44	2478.57	2143.31	1811.37	2081.63	2279.81	0.954674	0.0381689
arid1b	LL0000001333	ENSDARG00000092503	569589	1385.08	1563.19	1204.94	1151.08	1105.1	1559.97	0.839947	0.122101
arid2	LL0000001334	ENSDARG00000007413	566352	750.699	744.844	768.467	888.934	997.14	920.333	0.480882	-0.309844
arid3a	LL0000001335	ENSDARG00000070843	562799	861.153	1422.06	1203.96	504.583	767.484	630.834	0.0370593	0.873851
arid3b	LL0000001336	ENSDARG00000104034	571249	1444.7	1944.44	1366.06	842.614	1040.32	924.245	0.0437513	0.760375
arid3c	LL0000001337	ENSDARG00000067729	569444	983.337	1266.23	1067.26	544.989	702.709	962.389	0.201752	0.585684
arid4a	LL0000001338	ENSDARG00000043873	327404	1974.49	1886.61	1795.69	1413.23	1762.66	1501.29	0.547219	0.274347
arid5a	LL0000001339	ENSDARG00000077120	100462698	42.0313	4.90029	23.4348	44.3481	28.4617	25.429	0.750904	-0.481241
arid5b	LL0000001340	ENSDARG00000037196	100536827	516.105	887.933	622.976	366.611	476.978	460.656	0.171065	0.636122
arid6	LL0000001341	ENSDARG00000069988	572528	63.5357	43.1226	60.54	41.3916	41.2204	168.222	0.58684	-0.585267
arih1	LL0000001342	ENSDARG00000003616	327005	858.221	1173.13	905.17	966.789	947.087	1039.65	0.988973	-0.00833896
arih1l	LL0000001343	ENSDARG00000036870	405859	694.983	907.534	615.164	398.148	560.401	487.063	0.160801	0.617356
arih2	LL0000001344	ENSDARG00000012848	406417	622.65	803.648	665.94	509.511	570.215	489.019	0.350509	0.415433
arl1	LL0000001345	ENSDARG00000101680	436746	634.38	760.525	810.455	512.467	744.911	609.317	0.661357	0.24052
arl11	LL0000001346	ENSDARG00000036637	324689	46.9187	22.5413	34.1758	44.3481	50.0533	79.221	0.401801	-0.744459
arl13a	LL0000001347	ENSDARG00000052575	793658	119.252	25.4815	34.1758	220.755	180.584	53.7921	0.136562	-1.34699
arl13b	LL0000001348	ENSDARG00000012763	286784	211.134	330.28	205.055	372.524	222.786	213.212	0.890011	-0.115187
arl14	LL0000001349	ENSDARG00000063223	556921	83.0852	84.285	63.4693	63.0729	40.2389	33.2533	0.309777	0.75743
arl14ep	LL0000001350	ENSDARG00000001210	751672	362.642	263.636	324.182	261.161	403.371	565.306	0.560205	-0.371795
arl15a	LL0000001351	ENSDARG00000076040	567657	5.86483	13.7208	12.6939	82.7832	62.812	55.7481	0.000368612	-2.64099
arl15b	LL0000001352	ENSDARG00000057995	560030	33.2341	25.4815	18.5526	35.4785	20.6102	33.2533	0.88044	-0.209458
arl16	LL0000001353	ENSDARG00000059498	100037345	152.486	206.792	191.384	215.828	126.605	213.212	0.987688	-0.0129981
arl2	LL0000001354	ENSDARG00000069496	449774	443.772	293.037	333.946	152.755	237.508	468.48	0.692174	0.318289
arl2bp	LL0000001355	ENSDARG00000025383	393976	68.4231	99.9659	112.292	132.059	121.698	136.925	0.462895	-0.477067
arl3	LL0000001356	ENSDARG00000071409	797451	439.863	757.585	520.449	407.017	269.895	361.874	0.127085	0.725744
arl3l1	LL0000001357	ENSDARG00000111106	393666	81.1302	66.6439	88.8571	428.699	227.693	120.299	0.00376733	-1.71463
arl3l2	LL0000001358	ENSDARG00000015404	393692	20.5269	22.5413	41.011	187.248	108.94	56.7262	0.003339	-2.06935
arl4aa	LL0000001359	ENSDARG00000099918	393834	75.2654	110.747	103.504	201.045	377.853	318.84	0.000468946	-1.63269
arl4ab	LL0000001360	ENSDARG00000033182	338267	588.438	455.727	505.802	120.233	216.898	216.146	0.000427423	1.48611
arl4ca	LL0000001361	ENSDARG00000057606	550444	396.854	547.852	331.993	156.697	188.436	184.849	0.00210934	1.26837
arl4cb	LL0000001362	ENSDARG00000032708	406531	174.968	410.644	192.361	247.364	288.542	378.5	0.775263	-0.233161
arl4d	LL0000001363	ENSDARG00000045074	323573	583.551	506.69	513.613	399.133	538.809	368.72	0.581299	0.295661
arl5a	LL0000001364	ENSDARG00000018627	436611	426.178	510.61	288.053	185.277	318.967	403.929	0.511344	0.431509
arl5c	LL0000001365	ENSDARG00000035719	393819	2078.11	1782.73	1392.42	501.627	1026.58	278.741	0.00393406	1.53966
arl6	LL0000001366	ENSDARG00000032056	494134	230.683	180.331	132.797	241.451	93.2365	87.0453	0.676501	0.366859
arl6ip1	LL0000001367	ENSDARG00000054578	394087	2040.96	2152.21	2211.66	2222.33	2949.22	3550.28	0.309167	-0.445474
arl6ip4	LL0000001368	ENSDARG00000105036	553796	242.413	223.453	283.171	236.523	299.338	428.38	0.547335	-0.364385
arl6ip5a	LL0000001369	ENSDARG00000077044	450076	50.8286	85.265	41.9874	63.0729	56.9233	44.0117	0.916543	0.118767
arl6ip5b	LL0000001370	ENSDARG00000016238	436790	1029.28	1042.78	813.384	385.336	406.315	533.03	0.0020099	1.12313
arl6ip6	LL0000001371	ENSDARG00000071013	100037347	147.598	300.878	228.49	150.784	246.341	236.685	0.913955	0.0949886
arl8	LL0000001372	ENSDARG00000094709	327551	402.719	1078.06	846.583	565.685	440.665	311.016	0.150265	0.821057
arl8a	LL0000001373	ENSDARG00000078686	567222	1330.34	1655.32	1360.2	1404.36	1086.45	1584.42	0.882787	0.0927546
arl8ba	LL0000001374	ENSDARG00000006915	337424	399.786	493.949	401.322	268.06	337.614	535.964	0.798681	0.18187
arl8bb	LL0000001375	ENSDARG00000070318	562445	218.954	203.852	273.406	193.161	328.781	222.014	0.903232	-0.0956911
arl9	LL0000001376	ENSDARG00000071881	751670	95.7923	253.835	198.22	169.508	125.624	75.3089	0.467493	0.56458
armc1	LL0000001377	ENSDARG00000013861	494066	329.408	959.477	738.197	442.496	452.442	546.723	0.446212	0.49166
armc10	LL0000001378	ENSDARG00000062960	557740	105.567	138.188	171.855	147.827	253.211	144.75	0.577955	-0.3931
armc1l	LL0000001379	ENSDARG00000020887	321240	183.765	284.217	296.841	271.016	430.851	466.524	0.257593	-0.611351
armc2	LL0000001380	ENSDARG00000022660	555846	143.688	36.2621	57.6106	127.131	38.276	98.7818	0.909139	-0.153218
armc3	LL0000001381	ENSDARG00000074708	560136	1.95494	0	0.976451	31.5364	17.6659	3.91215	0.0213975	-4.17863
armc4	LL0000001382	ENSDARG00000055128	799229	21.5044	7.84046	12.6939	69.9715	52.9976	43.0336	0.0143893	-1.98125
armc5	LL0000001383	ENSDARG00000078083	569910	83.0852	138.188	136.703	186.262	131.513	100.738	0.789661	-0.225353
ARMC6	LL0000001384	ENSDARG00000103770	555425	90.9049	78.4046	122.056	71.9425	97.1623	68.4626	0.717348	0.294528
armc7	LL0000001385	ENSDARG00000061197	767659	127.071	85.265	77.1397	58.1453	79.4964	112.474	0.820398	0.210761
armc8	LL0000001386	ENSDARG00000062258	571528	208.202	176.41	226.537	144.871	155.067	155.508	0.436769	0.424248
armc9	LL0000001387	ENSDARG00000087299	100334308	204.292	163.67	160.138	142.9	171.751	144.75	0.76913	0.201057
armh1	LL0000001388	ENSDARG00000029859	100000984	6.84231	0	3.90581	36.464	23.5545	37.1654	0.00985367	-3.17618
armh3	LL0000001389	ENSDARG00000104285	393591	476.029	499.83	458.932	324.234	378.835	352.093	0.311031	0.443366
armt1	LL0000001390	ENSDARG00000055676	541518	325.498	349.881	272.43	178.378	191.38	194.629	0.078431	0.74789
arnt	LL0000001391	ENSDARG00000021855	493634	1666.59	370.462	665.94	268.06	508.384	418.6	0.0719974	1.17749
arnt2	LL0000001392	ENSDARG00000103697	64277	1323.5	1303.48	1061.4	1028.88	1095.28	1825.02	0.888788	-0.0985773
arntl1a	LL0000001393	ENSDARG00000006791	58098	456.48	639.978	187.479	319.307	156.048	283.631	0.272892	0.758424
arntl1b	LL0000001394	ENSDARG00000035732	352935	769.271	997.699	333.946	570.613	279.71	264.07	0.147141	0.914782
arntl2	LL0000001395	ENSDARG00000041381	58099	152.486	170.53	51.7519	155.711	90.2922	60.6383	0.786702	0.289492
arpc1a	LL0000001396	ENSDARG00000008383	394243	1459.37	2177.69	1591.62	812.064	932.365	1432.82	0.113877	0.71865
arpc1b	LL0000001397	ENSDARG00000027063	335474	992.134	2000.3	1307.47	468.119	571.196	742.33	0.00324474	1.27107
arpc2	LL0000001398	ENSDARG00000075989	327068	2055.62	2467.79	2350.32	909.629	1630.17	1992.26	0.224216	0.600917
arpc3	LL0000001399	ENSDARG00000057882	415204	1431.02	1731.76	1481.28	656.352	1232.68	2107.67	0.784423	0.216562
arpc4	LL0000001400	ENSDARG00000054063	114456	651.974	1191.75	766.514	506.554	686.024	1157.02	0.851496	0.151747
arpc4l	LL0000001401	ENSDARG00000058225	445305	1096.72	1424.02	1238.14	603.135	744.911	1070.95	0.157362	0.63588
arpc5a	LL0000001402	ENSDARG00000039142	336504	1001.91	1572.01	1028.2	516.409	891.145	1511.07	0.684898	0.303543
arpc5b	LL0000001403	ENSDARG00000019062	399482	730.172	1181.95	921.77	444.467	767.484	1377.08	0.884312	0.130355
arpc5la	LL0000001404	ENSDARG00000041720	393550	259.03	221.493	237.278	150.784	198.25	267.004	0.749069	0.220517
arpc5lb	LL0000001405	ENSDARG00000035433	556104	265.872	385.163	272.43	198.088	292.468	430.336	0.997504	0.00397335
arpin	LL0000001406	ENSDARG00000041085	550477	264.895	257.755	254.854	71.9425	119.735	153.552	0.0163672	1.1712
arpp19a	LL0000001407	ENSDARG00000032532	393603	1462.3	1833.69	1633.6	889.919	1069.77	1618.65	0.350336	0.462166
arpp19b	LL0000001408	ENSDARG00000039880	393947	497.533	465.528	546.813	340.988	577.085	636.702	0.957622	-0.0422982
arpp21	LL0000001409	ENSDARG00000061081	564134	98.7247	151.909	63.4693	107.421	146.234	142.793	0.680111	-0.33597
arr3a	LL0000001410	ENSDARG00000056511	436678	355.8	447.887	463.814	2772.25	1738.13	727.66	7.4835e-05	-2.04703
arr3b	LL0000001411	ENSDARG00000098475	796867	597.236	245.015	556.577	2205.58	858.757	1029.87	0.00460173	-1.54935
arrb1	LL0000001412	ENSDARG00000043241	553266	177.9	166.61	136.703	85.7397	72.6263	126.167	0.181353	0.758011
arrb2a	LL0000001413	ENSDARG00000039215	321378	247.301	360.661	244.113	333.104	205.12	409.798	0.843737	-0.153965
arrb2b	LL0000001414	ENSDARG00000011545	394099	1108.45	1797.43	1460.77	925.398	1206.19	1496.4	0.647949	0.267349
arrdc1a	LL0000001415	ENSDARG00000068148	100006005	65.4906	43.1226	47.8461	103.479	173.714	181.915	0.00395012	-1.55307
arrdc1b	LL0000001416	ENSDARG00000079839	570029	76.2428	81.3448	143.538	151.769	144.271	150.618	0.376971	-0.568767
arrdc2	LL0000001417	ENSDARG00000020761	335206	3141.6	3099.92	2805.34	575.54	879.368	1376.1	5.65386e-05	1.67609
arrdc3a	LL0000001418	ENSDARG00000052690	566685	5843.33	5629.45	3372.66	2270.62	1521.23	2192.76	0.00083822	1.31069
arrdc3b	LL0000001419	ENSDARG00000036028	447866	4190.42	2280.6	1980.24	1232.88	1207.17	1879.79	0.0410954	0.968187
arsa	LL0000001420	ENSDARG00000042270	541416	65.4906	105.846	91.7864	94.6093	119.735	113.452	0.676155	-0.317107
ARSB	LL0000001421	ENSDARG00000108788	100538007	2.93242	0.980058	5.85871	16.7537	4.90719	0	1	-1.14798
arsg	LL0000001422	ENSDARG00000101715	564790	111.432	138.188	153.303	80.8121	66.7377	37.1654	0.0570567	1.12534
arsh	LL0000001423	ENSDARG00000002299	100332997	487.759	541.972	534.119	173.45	288.542	153.552	0.00149529	1.34517
arsia	LL0000001424	ENSDARG00000077606	100329483	596.258	277.356	382.769	48.2902	79.4964	44.0117	9.1805e-09	2.87051
arsib	LL0000001425	ENSDARG00000117075	563783	32.2566	30.3818	21.4819	52.2322	28.4617	18.5827	0.863526	-0.238845
arsj	LL0000001426	ENSDARG00000077590	559800	473.097	494.929	332.97	64.0584	112.865	149.64	2.33383e-05	1.99407
arsk	LL0000001427	ENSDARG00000059714	562412	29.3242	66.6439	50.7755	39.4206	46.1275	44.0117	0.87848	0.179619
art4	LL0000001428	ENSDARG00000078178	555597	6.84231	10.7806	1.9529	11.8262	7.8515	2.93411	1	-0.207899
artn	LL0000001429	ENSDARG00000096252	101882107	20.5269	0.980058	13.6703	24.6378	11.7772	0	0.986999	-0.0495829
artnb	LL0000001431	ENSDARG00000093714	101883396	228.729	393.983	171.855	123.189	97.1623	102.694	0.0117995	1.29843
arv1	LL0000001432	ENSDARG00000074757	568203	140.756	132.308	106.433	137.972	131.513	129.101	0.932276	-0.0708014
arvcfa	LL0000001433	ENSDARG00000074329	572216	28.3467	4.90029	22.4584	123.189	34.3503	107.584	0.0116131	-2.25062
arvcfb	LL0000001434	ENSDARG00000061688	564669	2168.03	1886.61	1700.98	920.47	1091.36	1220.59	0.0184836	0.83235
arxa	LL0000001435	ENSDARG00000058011	30657	20.5269	12.7408	45.8932	80.8121	36.3132	128.123	0.0621121	-1.6313
arxb	LL0000001436	ENSDARG00000101523	100329907	0	7.84046	2.92935	23.6523	14.7216	35.2093	0.0569559	-2.77287
as3mt	LL0000001437	ENSDARG00000027572	664699	73.3104	266.576	172.832	71.9425	154.086	149.64	0.625514	0.448641
asah1a	LL0000001438	ENSDARG00000037091	450068	289.332	278.336	232.395	101.508	109.921	139.859	0.00536876	1.1874
asah1b	LL0000001439	ENSDARG00000034817	393549	297.152	473.368	389.604	168.523	357.243	356.006	0.554303	0.39576
asah2	LL0000001440	ENSDARG00000012829	493602	23.4593	19.6012	24.4113	14.7827	3.92575	11.7364	0.381026	1.14822
asap1a	LL0000001441	ENSDARG00000029463	100170829	1263.87	2116.93	1537.91	1110.67	1086.45	1402.51	0.348101	0.450423
asap1b	LL0000001442	ENSDARG00000039729	565859	510.241	730.143	574.153	921.456	662.47	650.395	0.583198	-0.300228
asap2a	LL0000001443	ENSDARG00000010181	570669	230.683	318.519	263.642	371.539	347.429	400.017	0.336887	-0.461156
asap2b	LL0000001444	ENSDARG00000019564	560581	60.6033	99.9659	93.7393	81.7977	77.5335	94.8696	0.999406	0.000574836
asap3	LL0000001445	ENSDARG00000021896	664764	2721.28	3743.82	2394.26	851.484	1484.91	642.571	0.000372509	1.57239
asb1	LL0000001446	ENSDARG00000026635	554673	38.1214	31.3619	41.011	32.522	21.5916	16.6266	0.542444	0.643572
asb10	LL0000001447	ENSDARG00000099461	559467	2.93242	10.7806	3.90581	17.7393	6.87006	6.84626	0.691055	-0.836199
asb11	LL0000001448	ENSDARG00000056561	791758	2.93242	13.7208	21.4819	14.7827	6.87006	11.7364	0.933471	0.191833
asb12a	LL0000001449	ENSDARG00000017086	322927	351.89	426.325	387.651	202.03	332.707	511.514	0.845509	0.15613
asb12b	LL0000001450	ENSDARG00000037558	445507	1.95494	7.84046	9.76451	22.6668	17.6659	17.6047	0.262499	-1.56655
asb13a.1	LL0000001451	ENSDARG00000079698	436801	38.1214	152.889	57.6106	81.7977	73.6078	94.8696	0.99415	-0.00964195
asb13a.2	LL0000001452	ENSDARG00000045765	563551	4.88736	31.3619	3.90581	14.7827	17.6659	12.7145	0.941409	-0.169744
asb13b	LL0000001453	ENSDARG00000089833	556808	66.4681	101.926	143.538	79.8266	95.1994	86.0673	0.767651	0.256672
asb14a	LL0000001454	ENSDARG00000008473	568371	14.6621	0.980058	8.78806	11.8262	16.6844	11.7364	0.722388	-0.720057
asb14b	LL0000001455	ENSDARG00000087741	100535284	65.4906	16.661	18.5526	17.7393	18.6473	11.7364	0.383388	1.06544
asb15a	LL0000001456	ENSDARG00000045633	100151067	33.2341	16.661	12.6939	34.493	24.5359	50.8579	0.468484	-0.812091
asb15b	LL0000001457	ENSDARG00000045863	568579	23.4593	0.980058	12.6939	9.85514	7.8515	4.89019	0.749486	0.716843
asb16	LL0000001458	ENSDARG00000056468	678621	17.5945	3.92023	11.7174	19.7103	8.83293	3.91215	0.987969	0.0345167
asb18	LL0000001459	ENSDARG00000114572	792746	14.6621	24.5015	32.2229	45.3336	17.6659	12.7145	0.961806	-0.0846717
asb2a.1	LL0000001460	ENSDARG00000096748	567986	30.3016	12.7408	13.6703	39.4206	31.406	18.5827	0.605792	-0.656602
asb2b	LL0000001461	ENSDARG00000102490	402848	40.0764	21.5613	22.4584	84.7542	77.5335	95.8477	0.0110087	-1.618
asb3	LL0000001462	ENSDARG00000005246	334210	83.0852	161.71	116.198	125.16	144.271	153.552	0.774033	-0.228684
asb4	LL0000001463	ENSDARG00000034988	550321	9.77472	15.6809	24.4113	66.0294	69.682	78.243	0.0027995	-2.1011
asb5a	LL0000001464	ENSDARG00000097938	550441	17.5945	7.84046	18.5526	19.7103	16.6844	18.5827	0.844383	-0.321625
asb5b	LL0000001465	ENSDARG00000053222	550449	170.08	131.328	128.892	196.117	175.677	287.543	0.265321	-0.615703
asb6	LL0000001466	ENSDARG00000007125	553600	144.666	140.148	131.821	138.957	158.993	229.839	0.604035	-0.34123
asb7	LL0000001467	ENSDARG00000006494	405798	513.173	510.61	440.38	530.207	518.199	769.715	0.558995	-0.31239
asb8	LL0000001468	ENSDARG00000003383	327200	148.576	441.026	293.912	268.06	217.879	279.719	0.807584	0.206536
ascc1	LL0000001469	ENSDARG00000077760	550273	153.463	107.806	134.75	55.1888	142.308	185.827	0.966909	0.0469345
ascc2	LL0000001470	ENSDARG00000013058	393414	377.304	429.265	378.863	150.784	270.877	246.465	0.0729401	0.827179
ascc3	LL0000001471	ENSDARG00000086678	100332599	34.2115	34.302	73.2339	58.1453	76.5521	42.0556	0.768769	-0.318321
ascl1a	LL0000001472	ENSDARG00000038386	30466	28.3467	22.5413	74.2103	698.729	908.811	671.912	8.90043e-15	-4.1874
ascl1b	LL0000001473	ENSDARG00000101628	30478	23.4593	9.80058	30.27	164.581	164.881	473.37	6.8635e-08	-3.65946
asf1ba	LL0000001474	ENSDARG00000101037	386897	172.035	625.277	429.639	306.495	578.066	458.7	0.894949	-0.130681
asf1bb	LL0000001475	ENSDARG00000043713	792029	196.472	396.924	360.311	338.031	404.352	486.085	0.565734	-0.365266
ash1l	LL0000001476	ENSDARG00000070981	563799	1735.01	1700.4	1767.38	1431.95	1720.46	1463.14	0.72968	0.172782
ash2l	LL0000001477	ENSDARG00000060392	558193	507.308	828.149	694.257	543.018	796.927	779.496	0.933771	-0.0624227
asic1a	LL0000001478	ENSDARG00000008329	791696	18.572	16.661	29.2935	84.7542	55.9419	40.0995	0.0569699	-1.48622
asic1b	LL0000001479	ENSDARG00000101866	407672	370.462	534.132	437.45	235.538	201.195	327.643	0.0749927	0.812046
asic1c	LL0000001480	ENSDARG00000098428	407670	43.9863	30.3818	40.0345	69.9715	76.5521	133.013	0.0473117	-1.28895
asic2	LL0000001481	ENSDARG00000006849	407669	40.0764	28.4217	26.3642	154.726	59.8677	175.069	0.00165248	-2.03832
asic4a	LL0000001482	ENSDARG00000025162	407668	71.3555	59.7835	58.5871	84.7542	44.1647	82.1551	0.881878	-0.153816
asic4b	LL0000001483	ENSDARG00000004243	407667	23.4593	3.92023	11.7174	43.3626	30.4245	31.2972	0.203675	-1.42624
asip1	LL0000001484	ENSDARG00000077858	798574	985.292	1475.97	967.663	193.161	404.352	304.17	6.59688e-06	1.92704
asip2b	LL0000001485	ENSDARG00000114760	796595	4174.78	4963.01	3367.78	692.816	1433.88	1700.81	9.55498e-05	1.70808
asl	LL0000001486	ENSDARG00000033361	393423	123.162	102.906	122.056	69.9715	69.682	88.0234	0.311415	0.612581
asmt	LL0000001487	ENSDARG00000098249	100141344	44.9637	34.302	56.6342	102.493	109.921	75.3089	0.0828865	-1.08205
asmt2	LL0000001488	ENSDARG00000070874	568256	323.543	370.462	172.832	138.957	115.81	111.496	0.0119045	1.24289
asmtl	LL0000001489	ENSDARG00000021433	324134	248.278	259.715	166.973	251.306	217.879	207.344	0.997504	-0.0033335
asna1	LL0000001490	ENSDARG00000018190	325704	474.074	930.075	812.408	541.047	479.923	604.427	0.409202	0.44752
asns	LL0000001491	ENSDARG00000016375	394138	172.035	230.314	214.819	283.828	352.336	293.411	0.207275	-0.590918
asnsd1	LL0000001492	ENSDARG00000000540	368827	198.427	214.633	305.629	186.262	239.471	230.817	0.859891	0.130457
aspa	LL0000001493	ENSDARG00000005154	557232	223.841	331.26	307.582	152.755	141.327	274.829	0.308848	0.600574
aspdh	LL0000001494	ENSDARG00000038297	447919	0	0	3.90581	0	1.96287	9.78037	1	-1.58803
aspg	LL0000001495	ENSDARG00000052942	100124594	368.507	256.775	164.044	198.088	164.881	236.685	0.560504	0.396471
asph	LL0000001496	ENSDARG00000055945	323659	572.799	1741.56	1557.44	694.787	617.324	425.446	0.0319446	1.15595
asphd1	LL0000001497	ENSDARG00000075813	557921	10.7522	0.980058	6.83516	102.493	46.1275	111.496	1.52968e-05	-3.80794
asphd2	LL0000001498	ENSDARG00000059629	569819	258.053	294.997	264.618	208.929	181.566	369.698	0.897641	0.105106
aspm	LL0000001499	ENSDARG00000103754	554173	665.659	860.491	720.621	1157.98	2408.45	1203.96	0.0160542	-1.08626
aspn	LL0000001500	ENSDARG00000002192	65228	1863.06	5219.79	3837.45	1570.91	3067.97	824.486	0.128518	0.999153
aspscr1	LL0000001501	ENSDARG00000105321	550237	175.945	211.693	216.772	159.653	223.768	177.025	0.884306	0.108939
asrgl1	LL0000001502	ENSDARG00000021681	541402	16.617	63.7038	48.8226	46.3192	36.3132	42.0556	0.972114	0.0506265
ASS1	LL0000001503	ENSDARG00000103044		208.202	108.786	165.997	176.407	318.967	264.07	0.273831	-0.652966
ASTE1	LL0000001504	ENSDARG00000062530	100003699	25.4143	75.4645	33.1993	79.8266	46.1275	82.1551	0.511075	-0.634356
aste1a	LL0000001505	ENSDARG00000070132	100006826	17.5945	43.1226	76.1632	41.3916	36.3132	11.7364	0.634335	0.614079
astn1	LL0000001506	ENSDARG00000068323	791157	97.7472	140.148	108.386	680.005	288.542	698.319	2.67224e-06	-2.26714
asxl1	LL0000001507	ENSDARG00000036956	403066	677.388	806.588	801.667	865.281	643.823	840.134	0.954142	-0.0395918
asxl2	LL0000001508	ENSDARG00000076501	100150267	647.087	735.044	635.67	543.018	519.18	476.304	0.370673	0.391261
asz1	LL0000001509	ENSDARG00000004823	572911	13.6846	15.6809	6.83516	15.7682	4.90719	9.78037	0.90606	0.249393
atad1a	LL0000001510	ENSDARG00000023267	368672	175.945	196.992	208.961	240.465	184.51	238.641	0.773217	-0.189582
atad1b	LL0000001511	ENSDARG00000056609	368412	276.625	294.997	215.796	288.756	278.728	320.796	0.783805	-0.173905
atad2	LL0000001512	ENSDARG00000076590		380.237	753.665	619.07	332.118	603.584	363.83	0.493388	0.431802
atad2b	LL0000001513	ENSDARG00000060537	100331225	626.56	1102.57	835.842	1141.23	1187.54	923.267	0.526003	-0.342402
atad3	LL0000001514	ENSDARG00000086848	403004	45.9412	45.0827	28.3171	80.8121	40.2389	44.0117	0.63927	-0.467857
atad5a	LL0000001515	ENSDARG00000070568	560591	192.562	530.211	422.803	517.395	822.444	486.085	0.277735	-0.67256
atad5b	LL0000001516	ENSDARG00000101126	321619	46.9187	80.3648	60.54	69.9715	92.2551	56.7262	0.817924	-0.221253
atat1	LL0000001517	ENSDARG00000004472	406389	267.827	224.433	342.734	308.466	212.972	291.455	0.961857	0.0387237
atcaya	LL0000001518	ENSDARG00000071678	565827	50.8286	19.6012	22.4584	323.249	190.399	419.578	9.74902e-09	-3.32861
atcayb	LL0000001519	ENSDARG00000059781	100329872	38.1214	50.963	42.9639	321.278	158.011	587.8	2.19911e-07	-3.01459
ATE1	LL0000001520	ENSDARG00000103813	101886126	222.864	128.388	122.056	92.6383	111.884	117.364	0.387914	0.556201
atf1	LL0000001521	ENSDARG00000044301	325609	1227.71	1054.54	958.875	558.786	732.152	825.464	0.136912	0.614865
atf2	LL0000001522	ENSDARG00000023903	100006516	72.333	85.265	91.7864	171.479	80.4778	211.256	0.164262	-0.893319
atf3	LL0000001523	ENSDARG00000007823	393939	24576.6	25519.7	15400.6	6105.26	8885.93	536.943	0.136223	2.07655
atf4a	LL0000001524	ENSDARG00000111939	406514	4772.02	8589.23	8068.42	3575.44	5086.79	1441.63	0.0551635	1.08471
atf4b	LL0000001525	ENSDARG00000038141	556410	23210.1	39517.9	23776.6	9470.79	12604.6	4594.82	0.000340602	1.69755
atf5a	LL0000001526	ENSDARG00000068096	566223	177.9	242.074	136.703	1193.46	337.614	705.165	0.000219755	-2.00616
atf5b	LL0000001527	ENSDARG00000077785	567253	951.081	1447.55	997.933	289.741	334.67	475.326	3.79507e-05	1.62688
atf6	LL0000001528	ENSDARG00000012656	558071	253.165	293.037	457.956	552.873	570.215	302.214	0.406126	-0.505253
atf7a	LL0000001530	ENSDARG00000011298	566279	113.387	59.7835	93.7393	33.5075	56.9233	37.1654	0.121417	1.06477
atf7b	LL0000001531	ENSDARG00000055481	567018	223.841	327.339	353.475	283.828	154.086	227.883	0.470844	0.44231
atf7ip	LL0000001532	ENSDARG00000069619	558977	1092.81	1639.64	1490.06	1279.2	1292.55	1040.63	0.678155	0.225156
atf7ip2	LL0000001533	ENSDARG00000089698	100005485	191.585	221.493	199.196	153.74	149.178	302.214	0.985608	0.0168676
atg10	LL0000001534	ENSDARG00000104846	641330	192.562	176.41	188.455	114.32	129.55	147.684	0.340452	0.509543
atg101	LL0000001535	ENSDARG00000043287	567680	379.259	367.522	318.323	222.726	263.025	415.666	0.717588	0.240684
atg12	LL0000001536	ENSDARG00000069545	570965	139.779	56.8434	46.8697	47.3047	92.2551	89.0014	0.942686	0.0912422
atg13	LL0000001537	ENSDARG00000036040	393405	419.336	1005.54	779.208	544.004	476.978	727.66	0.620562	0.33393
ATG14	LL0000001538	ENSDARG00000002670	407686	62.5582	104.866	126.939	95.5949	95.1994	45.9678	0.7373	0.314241
atg16l1	LL0000001539	ENSDARG00000099430	550552	1556.14	450.827	509.708	354.785	571.196	666.043	0.371092	0.660645
atg16l2	LL0000001540	ENSDARG00000109384	100034627	43.9863	7.84046	18.5526	18.7248	17.6659	20.5388	0.856101	0.306026
ATG2A	LL0000001541	ENSDARG00000101507	101883461	29.3242	6.86041	45.8932	0	66.7377	35.2093	0.894193	-0.312769
atg2b	LL0000001542	ENSDARG00000097650	100000277	19.5494	1.96012	37.1052	39.4206	30.4245	13.6925	0.776066	-0.510935
atg3	LL0000001543	ENSDARG00000009350	336632	358.732	348.901	367.146	197.103	244.378	340.357	0.386589	0.459056
atg4a	LL0000001544	ENSDARG00000014531	554140	463.322	363.602	328.088	207.943	191.38	182.893	0.0141269	0.988294
atg4b	LL0000001545	ENSDARG00000052104	448859	397.831	346.941	221.654	193.161	204.139	220.058	0.199801	0.646532
atg4c	LL0000001546	ENSDARG00000044373	415193	184.742	449.847	268.524	184.291	193.343	185.827	0.241944	0.68057
atg4da	LL0000001547	ENSDARG00000043548	795933	178.877	157.789	108.386	234.552	177.64	213.212	0.400383	-0.490816
atg4db	LL0000001548	ENSDARG00000088145	100329304	16.617	1.96012	0	12.8117	1.96287	0.978037	1	0.238346
atg5	LL0000001549	ENSDARG00000023396	494180	460.389	381.243	365.193	201.045	335.651	351.115	0.422373	0.442856
atg7	LL0000001550	ENSDARG00000102893	100333016	92.8599	116.627	79.0926	61.1019	93.2365	75.3089	0.676943	0.329488
atg9a	LL0000001551	ENSDARG00000044551	100009663	410.538	271.476	306.606	235.538	207.083	340.357	0.588316	0.336423
atg9b	LL0000001552	ENSDARG00000055292	791223	945.216	982.998	821.196	568.642	621.25	592.691	0.0906251	0.625149
atic	LL0000001553	ENSDARG00000016706	140622	228.729	411.624	471.626	257.219	594.751	503.689	0.713914	-0.285882
atl1	LL0000001554	ENSDARG00000060481	571909	38.1214	9.80058	22.4584	203.016	126.605	253.312	1.75313e-06	-3.04996
atl2	LL0000001555	ENSDARG00000057719	323665	516.105	809.528	575.13	277.915	483.848	407.842	0.14756	0.700533
atl3	LL0000001556	ENSDARG00000004270	449995	1545.38	1987.56	1737.11	625.801	1085.47	706.143	0.00385243	1.12435
atm	LL0000001557	ENSDARG00000002385	403064	200.382	263.636	359.334	173.45	265.969	210.278	0.60051	0.341732
atmin	LL0000001558	ENSDARG00000068601	571606	65.4906	80.3648	91.7864	125.16	59.8677	68.4626	0.931194	-0.0930476
atn1	LL0000001559	ENSDARG00000092067	321707	460.389	369.482	447.215	526.264	483.848	560.415	0.550968	-0.29839
atoh1a	LL0000001560	ENSDARG00000055294	30303	13.6846	1.96012	2.92935	49.2757	55.9419	89.0014	0.000343672	-3.38618
atoh1b	LL0000001561	ENSDARG00000099564	493915	17.5945	4.90029	5.85871	142.9	108.94	110.518	1.38802e-07	-3.67565
atoh1c	LL0000001562	ENSDARG00000039602	100498672	9.77472	18.6211	1.9529	39.4206	26.4988	49.8799	0.0835022	-1.93221
atoh7	LL0000001563	ENSDARG00000069552	58216	3.90989	25.4815	7.81161	107.421	72.6263	46.9458	0.00360579	-2.60939
atoh8	LL0000001564	ENSDARG00000037555	561606	1067.4	1854.27	1107.3	358.727	496.607	476.304	5.89342e-05	1.59719
atox1	LL0000001565	ENSDARG00000087693	558347	354.822	474.348	342.734	133.044	227.693	352.093	0.22096	0.71716
atp10a	LL0000001566	ENSDARG00000061039	567172	1136.8	1238.79	1230.33	349.857	570.215	393.171	6.00712e-05	1.45723
atp10b	LL0000001567	ENSDARG00000076230	563932	61.5808	31.3619	98.6216	87.7107	70.6635	128.123	0.512873	-0.580661
atp10d	LL0000001568	ENSDARG00000078887	571658	278.58	447.887	401.322	294.669	265.969	316.884	0.513596	0.361976
atp11a	LL0000001569	ENSDARG00000008413	562925	383.169	287.157	364.216	1279.2	736.078	529.118	0.00541088	-1.2983
ATP11B	LL0000001570	ENSDARG00000101094	100329583	954.991	1500.47	1136.59	608.062	630.083	517.382	0.00569786	1.03291
atp11c	LL0000001571	ENSDARG00000036442	368385	464.299	703.682	661.058	446.438	513.292	605.405	0.704382	0.224782
atp13a1	LL0000001572	ENSDARG00000029931	334466	313.769	352.821	264.618	304.524	383.742	287.543	0.92567	-0.0675023
atp13a2	LL0000001573	ENSDARG00000061890	568666	82.1077	102.906	113.268	90.6673	136.42	97.8037	0.889255	-0.123287
atp13a3	LL0000001574	ENSDARG00000076622	572029	602.123	506.69	564.389	668.178	499.551	403.929	0.895832	0.0903496
atp1a1a.1	LL0000001575	ENSDARG00000002791	64612	10124.7	17651.8	12080.7	3458.17	4719.73	3813.37	2.07178e-06	1.73285
atp1a1a.2	LL0000001576	ENSDARG00000007739	64613	141.733	15.6809	83.9748	164.581	1299.42	1843.6	0.0148233	-3.77633
atp1a1a.3	LL0000001577	ENSDARG00000039131	64614	19.5494	33.322	12.6939	50.2612	125.624	289.499	0.000339952	-2.8276
atp1a1a.4	LL0000001578	ENSDARG00000001870	64615	43.0088	24.5015	35.1523	230.61	827.351	814.705	3.33498e-12	-4.18907
atp1a1a.5	LL0000001579	ENSDARG00000040252	245703	28.3467	16.661	8.78806	16.7537	23.5545	24.4509	0.869751	-0.267682
atp1a1b	LL0000001580	ENSDARG00000019856	64616	1797.57	1456.37	1543.77	4783.68	4012.11	8453.18	4.14401e-06	-1.84609
atp1a2a	LL0000001581	ENSDARG00000010472	64609	12.7071	13.7208	5.85871	27.5944	38.276	30.3192	0.118433	-1.57508
atp1a3a	LL0000001582	ENSDARG00000018259	64610	216.999	206.792	158.185	3026.51	1061.91	1924.78	9.59746e-13	-3.3691
atp1a3b	LL0000001583	ENSDARG00000104139	64611	58.6483	83.3049	180.644	1128.41	728.226	466.524	3.6893e-07	-2.84824
atp1b1a	LL0000001584	ENSDARG00000013144	64267	7242.09	8651.95	9262.62	2538.68	4349.73	3503.33	0.000412386	1.2755
atp1b1b	LL0000001585	ENSDARG00000076833	64273	469.187	65.6639	239.231	1300.88	5451.88	8053.16	0.00104624	-4.25753
atp1b2a	LL0000001586	ENSDARG00000099203	64269	1077.17	1069.24	1288.92	6764.57	3474.29	4757.17	1.45023e-08	-2.12605
atp1b2b	LL0000001587	ENSDARG00000034424	114457	95.7923	96.0457	269.501	1361.98	709.579	205.388	0.00139002	-2.30316
atp1b3a	LL0000001588	ENSDARG00000015790	30468	494.601	1360.32	866.112	1264.41	726.263	699.297	0.985847	0.016568
atp1b3b	LL0000001589	ENSDARG00000042837	64272	211.134	304.798	203.102	687.889	433.795	931.092	0.0007693	-1.51347
atp1b4	LL0000001590	ENSDARG00000053262	100037383	852.356	4704.28	2455.78	2193.75	1206.19	2086.15	0.507941	0.546456
atp23	LL0000001591	ENSDARG00000063686	100004177	126.094	141.128	144.515	101.508	173.714	175.069	0.877455	-0.129188
atp2a1	LL0000001592	ENSDARG00000020574	260440	847.469	2396.24	1139.52	965.804	1400.51	1939.45	0.979314	0.0257152
atp2a1l	LL0000001593	ENSDARG00000035458	494489	138.801	306.758	124.009	89.6818	134.457	272.872	0.853511	0.196505
atp2a2a	LL0000001594	ENSDARG00000029439	393940	166.17	245.015	223.607	128.117	187.454	176.047	0.555174	0.368705
atp2a2b	LL0000001595	ENSDARG00000005122	568265	1122.14	1522.03	1302.59	781.513	996.159	1004.44	0.229627	0.504475
atp2a3	LL0000001596	ENSDARG00000060978	568671	712.577	405.744	492.132	339.017	467.164	741.352	0.949103	0.0574767
atp2b1a	LL0000001597	ENSDARG00000012684	378746	499.488	592.935	521.425	1081.11	1029.53	1220.59	0.00170534	-1.04556
atp2b1b	LL0000001598	ENSDARG00000007788	561190	196.472	96.0457	245.089	1307.78	932.365	191.695	0.00165614	-2.17739
atp2b2	LL0000001599	ENSDARG00000063433	557430	4599.99	4974.77	4459.45	3217.7	3323.15	6141.1	0.827963	0.146169
atp2b3a	LL0000001600	ENSDARG00000043474	436745	280.535	208.752	299.771	1443.78	729.208	1946.29	2.07022e-07	-2.38418
atp2b3b	LL0000001601	ENSDARG00000023445	558525	127.071	87.2252	67.3751	1073.22	708.598	2230.9	1.33547e-12	-3.83251
atp2c1	LL0000001602	ENSDARG00000060197	559574	644.154	632.137	651.293	437.568	503.477	507.601	0.334742	0.41208
atp5f1b	LL0000001603	ENSDARG00000070083	554135	5791.52	8468.68	7714.94	6368.39	8535.56	9666.92	0.786776	-0.161077
atp5f1c	LL0000001604	ENSDARG00000045514	336957	2207.13	3258.69	3137.34	1781.81	3365.35	4379.65	0.847316	-0.14713
atp5f1d	LL0000001605	ENSDARG00000019404	335709	1614.78	1309.36	1308.44	839.658	1848.05	2442.16	0.700227	-0.277389
atp5f1e	LL0000001606	ENSDARG00000095897	798291	1876.75	620.377	808.502	607.077	1598.76	1870.99	0.74287	-0.302526
atp5fa1	LL0000001607	ENSDARG00000010149	553755	6374.1	8276.59	7953.2	5705.14	8657.26	8289.84	0.997504	-0.0030841
atp5if1a	LL0000001608	ENSDARG00000067975	100037369	566.934	247.955	424.756	206.958	581.992	664.087	0.804916	-0.229159
atp5if1b	LL0000001609	ENSDARG00000044092	558368	467.232	218.553	349.57	247.364	456.368	806.881	0.462188	-0.545026
atp5l	LL0000001610	ENSDARG00000011841	326977	2769.18	1309.36	1640.44	959.891	2388.82	3365.43	0.794193	-0.231449
atp5mc1	LL0000001611	ENSDARG00000056008	406301	1851.33	1852.31	2354.22	1629.05	4067.08	5981.68	0.0936532	-0.94689
atp5mc3a	LL0000001612	ENSDARG00000017775	394151	1376.28	1935.61	1968.53	1193.46	1956.99	2433.36	0.915034	-0.0806013
atp5mc3b	LL0000001613	ENSDARG00000009447	81541	6870.65	4276.97	5488.63	2955.56	6481.41	6975.36	0.982298	0.0195501
atp5md	LL0000001614	ENSDARG00000096003	794625	514.15	233.254	322.229	283.828	660.507	913.487	0.22695	-0.796508
atp5mea	LL0000001615	ENSDARG00000078113	559659	696.938	352.821	441.356	285.799	648.73	663.109	0.912304	-0.0995635
atp5meb	LL0000001616	ENSDARG00000068940	767750	1924.64	1007.5	1313.33	574.555	1340.64	1969.77	0.891485	0.128014
atp5mf	LL0000001617	ENSDARG00000037867	402883	528.813	294.997	375.934	296.64	597.695	855.783	0.416333	-0.544742
atp5pb	LL0000001618	ENSDARG00000011553	449787	4125.91	4127.02	3576.74	1932.59	3489.99	4269.13	0.636524	0.287582
atp5pd	LL0000001619	ENSDARG00000098355	393675	2018.48	1996.38	2365.94	1326.5	2878.55	3983.55	0.594686	-0.359884
atp5pf	LL0000001620	ENSDARG00000014313	406599	1394.85	973.198	1170.77	802.208	1773.46	2373.7	0.448722	-0.483982
atp5po	LL0000001621	ENSDARG00000001788	335191	4546.22	3687.96	3916.55	1935.55	4594.11	5547.43	0.991419	0.008768
ATP6	LL0000001622	ENSDARG00000063911	140519	59229	55623.2	62390.4	55778.1	90023.3	99388.2	0.30804	-0.468172
atp6ap1a	LL0000001623	ENSDARG00000041417	100004566	93.8373	83.3049	70.3045	1282.15	596.714	905.663	1.93779e-15	-3.49224
atp6ap1b	LL0000001624	ENSDARG00000037153	195824	389.034	632.137	608.329	286.785	373.928	424.468	0.23595	0.58647
atp6ap1la	LL0000001625	ENSDARG00000091509	100000415	127.071	51.9431	54.6813	628.758	240.452	359.918	3.41831e-05	-2.39489
atp6ap1lb	LL0000001626	ENSDARG00000090963	561786	86.995	108.786	86.9042	746.034	240.452	184.849	0.000902892	-2.05086
atp6ap2	LL0000001627	ENSDARG00000008735	406296	1077.17	1194.69	1109.25	2265.7	1745	2177.11	0.00961915	-0.871928
atp6v0a1a	LL0000001628	ENSDARG00000020847	324307	285.422	589.995	527.284	901.745	589.844	347.203	0.59559	-0.390534
atp6v0a1b	LL0000001629	ENSDARG00000015174	553691	146.621	37.2422	86.9042	2018.33	834.221	2364.89	2.76631e-12	-4.26817
atp6v0a2a	LL0000001630	ENSDARG00000035538	561469	59.6258	91.1454	43.9403	363.655	164.881	285.587	0.000112785	-2.06396
atp6v0a2b	LL0000001631	ENSDARG00000035565	561117	241.436	281.277	266.571	221.741	295.413	271.894	0.999407	0.000409653
atp6v0b	LL0000001632	ENSDARG00000031681	321724	999.954	1467.15	1162.95	2674.68	1607.59	2296.43	0.0351633	-0.857814
atp6v0ca	LL0000001633	ENSDARG00000057853	192336	2603.99	2122.81	2714.53	2640.19	3467.42	3819.24	0.34654	-0.415777
atp6v0cb	LL0000001634	ENSDARG00000036577	325402	821.077	655.659	622.976	4904.9	2822.61	4425.62	5.43653e-12	-2.53306
atp6v0d1	LL0000001635	ENSDARG00000069090	322811	404.674	715.442	542.907	688.874	545.679	1116.92	0.39472	-0.499773
atp6v0e1	LL0000001636	ENSDARG00000101794	450017	0	50.963	133.774	0	99.1251	133.013	0.958168	-0.329492
atp6v1aa	LL0000001637	ENSDARG00000034534	394110	423.246	407.704	472.602	623.83	586.899	1238.2	0.0576463	-0.909713
atp6v1ab	LL0000001638	ENSDARG00000076318	337583	58.6483	104.866	116.198	171.479	174.696	395.127	0.0169345	-1.40616
atp6v1b2	LL0000001639	ENSDARG00000043465	359840	119.252	312.639	143.538	426.728	273.821	786.342	0.0256887	-1.36963
atp6v1ba	LL0000001640	ENSDARG00000013443	359839	428.133	827.169	826.078	996.355	705.653	878.278	0.617688	-0.309989
atp6v1c1a	LL0000001641	ENSDARG00000023967	368907	209.179	416.525	260.713	418.843	289.524	471.414	0.516993	-0.412485
atp6v1c1b	LL0000001642	ENSDARG00000035880	449655	83.0852	53.9032	103.504	135.015	195.306	341.335	0.0103126	-1.48174
atp6v1c2	LL0000001643	ENSDARG00000070440	100538220	13.6846	0	1.9529	6.8986	6.87006	0	1	0.18393
atp6v1d	LL0000001644	ENSDARG00000011175	393935	317.679	227.373	256.807	357.742	371.965	567.262	0.146235	-0.693738
atp6v1e1a	LL0000001645	ENSDARG00000014085	108179059	289.332	559.613	443.309	220.755	250.266	239.619	0.0629585	0.862681
atp6v1e1b	LL0000001646	ENSDARG00000030694	192335	516.105	426.325	492.132	782.498	968.678	2073.44	0.00316511	-1.41471
atp6v1f	LL0000001647	ENSDARG00000045543	436799	344.07	456.707	340.782	349.857	393.556	858.717	0.45241	-0.489019
atp6v1g1	LL0000001648	ENSDARG00000022315	335025	376.327	852.65	704.021	1086.04	840.11	1542.36	0.10525	-0.843485
atp6v1h	LL0000001649	ENSDARG00000006370	286779	414.448	572.354	468.697	831.774	658.544	1216.68	0.0402411	-0.895194
atp7a	LL0000001650	ENSDARG00000003699	564924	506.331	524.331	437.45	285.799	239.471	234.729	0.0115293	0.949911
atp7b	LL0000001651	ENSDARG00000058145	556499	29.3242	6.86041	16.5997	30.5509	31.406	27.385	0.549602	-0.759113
ATP8	LL0000001652	ENSDARG00000063910	140520	911.004	376.342	987.192	1072.24	2176.83	1994.22	0.0229092	-1.20489
atp8a1	LL0000001654	ENSDARG00000063001	767630	397.831	379.282	456.979	1252.59	868.572	1292.97	3.79958e-05	-1.46806
atp8a2	LL0000001655	ENSDARG00000077492	100330943	230.683	186.211	186.502	554.844	430.851	474.348	0.000633159	-1.27482
atp8b1	LL0000001656	ENSDARG00000060980	100148342	52.7835	46.0627	93.7393	109.392	148.197	287.543	0.0168569	-1.50111
atp8b2	LL0000001657	ENSDARG00000099216		23.4593	0	0	10.8407	18.6473	62.5944	0.348678	-1.97276
atp8b3	LL0000001658	ENSDARG00000042285	566530	58.6483	51.9431	28.3171	130.088	79.4964	143.771	0.0313818	-1.34703
atp8b4	LL0000001659	ENSDARG00000079453	559291	20.5269	9.80058	23.4348	34.493	11.7772	13.6925	0.932189	-0.157187
atp8b5a	LL0000001660	ENSDARG00000062040	100330945	164.215	254.815	193.337	88.6963	119.735	44.0117	0.0267079	1.2785
ATP9A	LL0000001661	ENSDARG00000115869	101886226	67.4456	62.7237	81.0455	140.928	79.4964	99.7598	0.38038	-0.600122
atp9b	LL0000001662	ENSDARG00000062521	568160	241.436	220.513	124.009	201.045	173.714	165.288	0.887528	0.117714
atpaf1	LL0000001663	ENSDARG00000042799	550606	244.368	444.946	394.486	254.263	309.153	447.941	0.902975	0.0997732
atpaf2	LL0000001664	ENSDARG00000056270	560253	121.207	206.792	193.337	176.407	214.935	222.014	0.740704	-0.234541
atpv0e2	LL0000001665	ENSDARG00000059057	553767	156.396	168.57	163.067	990.442	621.25	827.42	2.53913e-10	-2.3213
atr	LL0000001666	ENSDARG00000079625	567770	138.801	265.596	240.207	203.016	158.993	209.3	0.821844	0.174131
atraid	LL0000001667	ENSDARG00000043388	553468	230.683	195.032	195.29	155.711	96.1808	215.168	0.547226	0.410965
atrip	LL0000001668	ENSDARG00000063076	558534	118.274	63.7038	62.4929	102.493	148.197	92.9136	0.525297	-0.491066
atrn	LL0000001669	ENSDARG00000062164	794975	1057.63	1227.03	924.699	694.787	604.565	646.483	0.0494632	0.721895
atrnl1a	LL0000001670	ENSDARG00000077188	792417	280.535	306.758	165.02	150.784	125.624	115.408	0.0625658	0.941175
atrnl1b	LL0000001671	ENSDARG00000006420	569196	949.126	1315.24	963.758	952.992	875.442	1040.63	0.76455	0.170107
atrx	LL0000001672	ENSDARG00000042236	323299	3973.43	5632.39	5426.14	4038.64	5302.7	4876.49	0.897035	0.0803302
atrxl	LL0000001673	ENSDARG00000099449		872.883	1240.75	1015.51	924.412	748.836	650.395	0.361436	0.429389
atxn10	LL0000001674	ENSDARG00000008439	100034473	159.328	147.009	127.915	133.044	195.306	194.629	0.692019	-0.268266
atxn1a	LL0000001675	ENSDARG00000061687	557340	1021.46	987.898	983.287	870.209	935.31	818.617	0.703562	0.189581
atxn1b	LL0000001676	ENSDARG00000060862	565841	260.008	391.043	391.557	593.279	425.944	711.033	0.120711	-0.730798
atxn1l	LL0000001677	ENSDARG00000086977	793927	193.54	74.4844	130.844	154.726	171.751	100.738	0.922673	-0.0989927
atxn2	LL0000001678	ENSDARG00000052897	569210	301.061	480.228	311.488	235.538	310.134	264.07	0.432806	0.432443
atxn2l	LL0000001679	ENSDARG00000011597	324525	937.396	721.323	649.34	582.439	791.038	720.814	0.82056	0.140211
atxn3	LL0000001680	ENSDARG00000099274	394079	206.247	122.507	109.363	116.291	173.714	116.386	0.905883	0.108446
atxn7	LL0000001681	ENSDARG00000074804	100001490	489.714	617.437	644.458	449.394	492.681	441.095	0.478771	0.340701
atxn7l1	LL0000001682	ENSDARG00000089860	100536590	93.8373	48.0228	61.5164	65.0439	51.0347	35.2093	0.648135	0.426986
atxn7l2a	LL0000001683	ENSDARG00000055300	692316	198.427	244.034	225.56	210.9	290.505	124.211	0.913685	0.0946415
atxn7l2b	LL0000001684	ENSDARG00000056268	436928	297.152	449.847	279.265	266.089	249.285	245.487	0.42402	0.431686
atxn7l3	LL0000001685	ENSDARG00000029331	368510	128.049	152.889	117.174	173.45	144.271	176.047	0.62796	-0.310679
auh	LL0000001686	ENSDARG00000042975	445182	106.544	319.499	303.676	217.799	253.211	305.148	0.929074	-0.0890291
aup1	LL0000001687	ENSDARG00000092609	324654	692.05	910.474	781.161	484.873	565.308	456.743	0.0916802	0.661586
aurka	LL0000001688	ENSDARG00000012485	445246	226.774	265.596	263.642	278.9	416.129	269.938	0.540047	-0.352075
aurkaip1	LL0000001689	ENSDARG00000074985	100126015	221.886	235.214	249.972	193.161	351.354	520.316	0.338101	-0.590734
aurkb	LL0000001690	ENSDARG00000037640	791894	248.278	554.713	502.872	381.394	432.814	393.171	0.887362	0.113119
auts2a	LL0000001691	ENSDARG00000056427	368890	1891.41	1723.92	1861.12	1652.71	2144.44	2137.01	0.83567	-0.115806
auts2b	LL0000001692	ENSDARG00000020946	100150849	210.157	453.767	259.736	625.801	502.496	585.844	0.0663124	-0.892071
aven	LL0000001694	ENSDARG00000002894	692323	212.112	324.399	320.276	204.001	219.842	319.818	0.773294	0.204252
avil	LL0000001695	ENSDARG00000059342	678618	23.4593	12.7408	16.5997	53.2178	30.4245	24.4509	0.316936	-1.0335
avl9	LL0000001696	ENSDARG00000055538	751682	248.278	509.63	311.488	369.568	247.322	241.575	0.648453	0.316977
avp	LL0000001697	ENSDARG00000058567	352922	0.977472	0	0	3.94206	3.92575	76.2869	0.00291163	-6.32313
avpr1aa	LL0000001698	ENSDARG00000077083	571591	21.5044	6.86041	20.5055	15.7682	8.83293	4.89019	0.673424	0.729051
avpr1ab	LL0000001699	ENSDARG00000045788	555939	652.952	780.126	1093.63	92.6383	131.513	68.4626	9.11696e-13	3.11023
avpr2aa	LL0000001700	ENSDARG00000007436	100007585	316.701	313.619	293.912	86.7252	70.6635	89.9794	1.362e-06	1.90159
avpr2ab	LL0000001701	ENSDARG00000029219	100151502	100.68	143.088	85.9277	127.131	160.956	73.3528	0.891335	-0.132606
axdnd1	LL0000001703	ENSDARG00000062355	557839	15.6396	1.96012	8.78806	22.6668	37.2946	41.0776	0.0905716	-1.93684
axin1	LL0000001704	ENSDARG00000102964	57931	1390.94	2252.17	1741.99	1081.11	1337.7	1495.42	0.327994	0.460239
axin2	LL0000001705	ENSDARG00000100149	58080	2174.88	3326.32	2556.35	1035.78	1318.07	1641.15	0.00920388	1.01214
AXL	LL0000001706	ENSDARG00000112045	100330721	51.806	30.3818	38.0816	34.493	38.276	18.5827	0.728523	0.396901
azi2	LL0000001707	ENSDARG00000102419	406377	30.3016	65.6639	41.011	62.0874	38.276	26.407	0.934219	0.1118
azin1a	LL0000001708	ENSDARG00000052789	550230	561.069	396.924	362.263	301.567	503.477	460.656	0.939602	0.0608649
azin1b	LL0000001709	ENSDARG00000035869	317764	3495.44	4933.61	4001.5	1748.3	2003.11	2420.64	0.00422658	1.01006
b2m	LL0000001710	ENSDARG00000053136	30400	150.531	442.006	299.771	84.7542	151.141	80.1991	0.0103592	1.49717
b2ml	LL0000001711	ENSDARG00000015887	791742	8056.33	6899.61	6263.94	1646.79	3588.13	2983.99	0.000801972	1.36839
b3galnt2	LL0000001712	ENSDARG00000046133	553716	184.742	230.314	208.961	98.5514	139.364	90.9575	0.0570035	0.924055
b3galt1a	LL0000001713	ENSDARG00000079700	559521	148.576	157.789	95.6922	143.885	122.68	193.651	0.808697	-0.194963
b3galt1b	LL0000001714		571003	49.8511	24.5015	23.4348	105.45	46.1275	105.628	0.0641554	-1.39518
b3galt2	LL0000001715	ENSDARG00000102061	404633	774.158	1476.95	867.089	880.064	636.953	444.029	0.218819	0.6691
b3galt4	LL0000001716	ENSDARG00000076218	101886595	21.5044	27.4416	59.5635	185.277	92.2551	100.738	0.00784667	-1.80147
b3galt6	LL0000001717	ENSDARG00000038414	572324	73.3104	66.6439	65.4222	93.6238	86.3665	118.343	0.417626	-0.538683
B3GAT1	LL0000001718	ENSDARG00000113928	100332644	0	0.980058	12.6939	26.6089	6.87006	16.6266	0.36838	-1.87318
b3gat1a	LL0000001719	ENSDARG00000040547	548607	73.3104	98.9859	88.8571	995.369	581.992	1152.13	2.52296e-15	-3.38568
b3gat1b	LL0000001720	ENSDARG00000055279	100332851	43.0088	28.4217	77.1397	312.408	99.1251	249.4	0.00086311	-2.15327
b3gat2	LL0000001721	ENSDARG00000030733	445060	155.418	96.0457	157.209	399.133	347.429	644.527	0.000109791	-1.76719
b3gat3	LL0000001722	ENSDARG00000001939	192334	259.03	268.536	259.736	206.958	289.524	315.906	0.953944	-0.0452861
b3glcta	LL0000001723	ENSDARG00000073917	799443	279.557	211.693	242.16	117.276	156.048	178.003	0.157921	0.7004
b3glctb	LL0000001724	ENSDARG00000077740	564156	17.5945	15.6809	13.6703	24.6378	11.7772	20.5388	0.863913	-0.278752
B3GNT10	LL0000001725	ENSDARG00000094253	101883349	12.7071	4.90029	1.9529	8.86963	0.981437	4.89019	1	0.408294
b3gnt2a	LL0000001726	ENSDARG00000052376	405766	17.5945	16.661	24.4113	47.3047	46.1275	26.407	0.272314	-1.03035
b3gnt2b	LL0000001727	ENSDARG00000091902	793362	475.052	708.582	650.317	216.813	201.195	185.827	1.54646e-05	1.60274
b3gnt2l	LL0000001728	ENSDARG00000068219	797513	81.1302	105.846	79.0926	128.117	214.935	424.468	0.00958679	-1.52847
b3gnt3.1	LL0000001729	ENSDARG00000043482	494166	13.6846	37.2422	17.5761	18.7248	8.83293	17.6047	0.680926	0.600987
b3gnt3.2	LL0000001730	ENSDARG00000054373	100002020	6.84231	33.322	1.9529	11.8262	3.92575	3.91215	0.606071	1.09901
b3gnt3.3	LL0000001731	ENSDARG00000093521	561028	30.3016	33.322	13.6703	40.4061	17.6659	20.5388	0.987688	-0.0242862
b3gnt3.4	LL0000001732	ENSDARG00000058100	561172	18.572	50.963	8.78806	52.2322	56.9233	37.1654	0.422373	-0.901751
b3gnt5a	LL0000001733	ENSDARG00000018971	336526	722.352	794.827	576.106	283.828	472.071	207.344	0.0169692	1.1198
b3gnt5b	LL0000001734	ENSDARG00000004396	791470	52.7835	48.0228	38.0816	29.5654	46.1275	62.5944	0.997389	0.00611134
b3gnt7	LL0000001735	ENSDARG00000038489	286748	587.461	1456.37	1161.98	230.61	261.062	401.973	0.000103474	1.84288
b3gnt7l	LL0000001736	ENSDARG00000053133	407623	235.571	200.912	204.078	121.218	128.568	144.75	0.138793	0.699155
b3gnt9	LL0000001737	ENSDARG00000041616	100034499	75.2654	151.909	181.62	69.9715	65.7563	50.8579	0.068169	1.13159
b3gntl1	LL0000001738	ENSDARG00000043431	619261	27.3692	33.322	46.8697	22.6668	36.3132	16.6266	0.661135	0.508639
b4galnt1a	LL0000001739	ENSDARG00000061520	558684	45.9412	39.2023	30.27	53.2178	38.276	45.9678	0.81393	-0.252198
b4galnt1b	LL0000001740	ENSDARG00000077352	793635	1.95494	0.980058	14.6468	32.522	21.5916	25.429	0.125436	-2.17725
b4galnt2.1	LL0000001741	ENSDARG00000094579	558078	5.86483	9.80058	6.83516	18.7248	16.6844	13.6925	0.435324	-1.12584
b4galnt2.2	LL0000001742	ENSDARG00000070605	557782	0	6.86041	5.85871	9.85514	8.83293	2.93411	1	-0.76544
b4galnt3a	LL0000001743	ENSDARG00000078749	561505	19.5494	0.980058	27.3406	37.4495	23.5545	69.4407	0.276954	-1.44613
b4galnt3b	LL0000001744	ENSDARG00000058939	553524	46.9187	31.3619	79.0926	136.001	82.4407	215.168	0.0292085	-1.46217
b4galnt4a	LL0000001745	ENSDARG00000046150	565184	217.976	108.786	172.832	591.308	440.665	604.427	6.98835e-05	-1.71167
b4galnt4b	LL0000001746	ENSDARG00000076701	559305	59.6258	34.302	35.1523	135.015	69.682	103.672	0.0532983	-1.25634
b4galt1	LL0000001747	ENSDARG00000002634	550425	135.869	170.53	168.926	48.2902	77.5335	103.672	0.0626253	1.05032
b4galt1l	LL0000001748	ENSDARG00000104404	768123	242.413	297.938	324.182	118.262	211.009	194.629	0.159306	0.722583
b4galt2	LL0000001749	ENSDARG00000077994	100148828	24.4368	27.4416	24.4113	55.1888	20.6102	13.6925	0.881965	-0.230047
b4galt3	LL0000001750	ENSDARG00000062329	561756	211.134	410.644	339.805	319.307	270.877	253.312	0.792298	0.189039
b4galt4	LL0000001751	ENSDARG00000104042	492760	407.606	589.995	414.015	263.132	312.097	490.975	0.498695	0.404824
b4galt5	LL0000001752	ENSDARG00000037815	724080	51.806	56.8434	22.4584	20.6958	27.4802	9.78037	0.242782	1.17781
b4galt6	LL0000001753	ENSDARG00000010301	393912	1684.18	2166.91	2253.65	1590.62	2168.98	1042.59	0.550078	0.346245
b4galt7	LL0000001754	ENSDARG00000021899	445022	229.706	391.043	290.983	173.45	198.25	182.893	0.137972	0.717158
b4gat1	LL0000001755	ENSDARG00000077583	101669768	113.387	242.074	179.667	281.857	223.768	257.224	0.40024	-0.511527
b9d1	LL0000001756	ENSDARG00000011727	554150	139.779	85.265	76.1632	82.7832	76.5521	52.814	0.512165	0.505746
b9d2	LL0000001757	ENSDARG00000017385	436667	131.959	148.969	82.9984	85.7397	87.3479	156.486	0.881878	0.142951
baalc	LL0000001758		101884762	9.77472	0	1.9529	6.8986	6.87006	0.978037	1	-0.330154
baalca	LL0000001759	ENSDARG00000077775	572429	36.1665	24.5015	46.8697	39.4206	20.6102	54.7701	0.948328	-0.0942972
baalcb	LL0000001760	ENSDARG00000089549	100536942	8.79725	31.3619	10.741	64.0584	37.2946	118.343	0.0167734	-2.11001
babam1	LL0000001761	ENSDARG00000077526	445296	508.286	476.308	402.298	277.915	269.895	500.755	0.494479	0.403403
babam2	LL0000001762	ENSDARG00000038863	550474	460.389	442.006	478.461	286.785	406.315	480.216	0.69419	0.234945
bace1	LL0000001763	ENSDARG00000101716	403005	98.7247	68.6041	91.7864	244.407	151.141	408.82	0.00246183	-1.63427
bace2	LL0000001764	ENSDARG00000044781	449818	706.713	777.186	648.364	219.77	422.999	274.829	0.00353467	1.21643
bach1a	LL0000001765	ENSDARG00000062553	678555	380.237	289.117	249.972	163.595	190.399	177.025	0.0799348	0.791802
bach1b	LL0000001766	ENSDARG00000002196	553688	638.289	562.553	561.46	248.35	305.227	207.344	0.00114287	1.21166
bach2a	LL0000001767	ENSDARG00000036569	557210	54.7385	53.9032	69.328	157.682	126.605	153.552	0.00858481	-1.29874
bach2b	LL0000001768	ENSDARG00000004074	555350	499.488	729.163	580.989	1384.65	858.757	761.891	0.117447	-0.731795
bada	LL0000001769	ENSDARG00000087993	564921	1315.68	1369.14	940.323	481.916	408.278	211.256	8.82732e-05	1.71867
badb	LL0000001770	ENSDARG00000054937	58100	167.148	244.034	160.138	115.305	212.972	195.607	0.884067	0.12499
bag1	LL0000001771	ENSDARG00000020895	558108	232.638	341.06	237.278	211.886	226.712	262.114	0.746526	0.210804
bag2	LL0000001772	ENSDARG00000035005	393975	2892.34	1343.66	2012.47	135.015	842.073	414.688	0.000659693	2.16656
bag3	LL0000001773	ENSDARG00000039486	445139	5850.17	2909.79	5684.9	394.206	851.887	103.672	4.31223e-07	3.41979
bag4	LL0000001774	ENSDARG00000043179	100001980	57.6709	147.009	175.761	145.856	183.529	154.53	0.681616	-0.347085
bag5	LL0000001775	ENSDARG00000017316	569580	336.25	268.536	219.702	348.872	318.967	365.786	0.558995	-0.326148
bag6	LL0000001776	ENSDARG00000075892	83910	716.487	908.514	736.244	449.394	603.584	651.373	0.304863	0.470305
bag6l	LL0000001777	ENSDARG00000077531	751663	156.396	166.61	143.538	183.306	167.826	176.047	0.794193	-0.176281
bahcc1a	LL0000001778	ENSDARG00000103739	797750	1355.75	1036.9	966.687	1000.3	1023.64	913.487	0.719615	0.193631
bahcc1b	LL0000001779	ENSDARG00000080009	794333	1548.32	2267.85	1719.53	1701.98	1924.6	1803.5	0.966666	0.0277888
bahd1	LL0000001780	ENSDARG00000086789	564712	1355.75	911.454	936.417	529.221	597.695	449.897	0.00757023	1.0227
baiap2a	LL0000001781	ENSDARG00000062799	678518	301.061	324.399	343.711	451.365	365.095	427.402	0.459186	-0.359997
baiap2b	LL0000001782	ENSDARG00000113723	100537012	35.189	21.5613	9.76451	66.0294	82.4407	92.9136	0.0114271	-1.85965
baiap2l1a	LL0000001783	ENSDARG00000029305	387261	29.3242	12.7408	54.6813	47.3047	51.0347	63.5724	0.47114	-0.742851
baiap2l1b	LL0000001784	ENSDARG00000031119	550528	8.79725	9.80058	2.92935	25.6234	30.4245	26.407	0.0808171	-1.93764
baiap2l2a	LL0000001785	ENSDARG00000016483	394210	7.81978	6.86041	5.85871	34.493	18.6473	15.6486	0.145661	-1.7437
baiap2l2b	LL0000001786	ENSDARG00000060933	564798	15.6396	13.7208	22.4584	27.5944	24.5359	38.1435	0.470215	-0.800826
baiap3	LL0000001787	ENSDARG00000079264	564728	20.5269	4.90029	13.6703	50.2612	28.4617	95.8477	0.0215157	-2.15857
bambia	LL0000001788	ENSDARG00000055381	83496	1216.95	1378.94	1130.73	347.886	427.907	287.543	1.69909e-07	1.80928
bambib	LL0000001789	ENSDARG00000099677	431736	809.347	657.619	915.911	230.61	456.368	250.378	0.00210765	1.34603
banf1	LL0000001790	ENSDARG00000037009	334717	1967.65	3332.2	3324.82	1298.91	2891.31	2993.77	0.713957	0.263678
banp	LL0000001791	ENSDARG00000017562	553659	163.238	328.319	212.866	207.943	175.677	177.025	0.628122	0.329349
bap1	LL0000001792	ENSDARG00000063051	558885	195.494	192.091	160.138	253.277	236.526	238.641	0.429555	-0.411373
bard1	LL0000001793	ENSDARG00000076733	100147913	38.1214	31.3619	60.54	68.0005	66.7377	47.9238	0.590173	-0.490297
barhl1a	LL0000001794	ENSDARG00000035508	550407	50.8286	33.322	31.2464	222.726	80.4778	187.783	0.000597643	-2.08905
barhl1b	LL0000001795	ENSDARG00000019013	553186	14.6621	0.980058	38.0816	278.9	121.698	346.225	2.38071e-05	-3.7969
barhl2	LL0000001796	ENSDARG00000104361	100001699	26.3918	15.6809	21.4819	519.366	155.067	676.802	8.81467e-12	-4.41007
barx1	LL0000001797	ENSDARG00000007407	553644	390.989	651.739	466.744	356.756	491.7	378.5	0.614603	0.298946
barx2	LL0000001798	ENSDARG00000041098	100002200	134.891	202.872	245.089	137.972	219.842	397.083	0.645773	-0.373195
basp1	LL0000001799	ENSDARG00000053358	569631	43.0088	15.6809	17.5761	85.7397	31.406	108.562	0.0729566	-1.56533
batf	LL0000001800	ENSDARG00000011818	564589	6.84231	1.96012	9.76451	6.8986	8.83293	11.7364	1	-0.564936
batf3	LL0000001801	ENSDARG00000042577	751677	14.6621	6.86041	8.78806	10.8407	18.6473	31.2972	0.480209	-1.00401
baxa	LL0000001802	ENSDARG00000089129	58081	663.704	651.739	473.579	336.06	472.071	401.973	0.214982	0.564023
baxb	LL0000001803	ENSDARG00000030881	503609	391.966	344	305.629	110.378	173.714	150.618	0.00258347	1.26063
baz1a	LL0000001804	ENSDARG00000099745	334173	1192.52	1187.83	1322.12	1188.53	1979.56	1080.73	0.750615	-0.198575
baz1b	LL0000001805	ENSDARG00000102832	571727	1097.7	1277.02	1431.48	1781.81	2486.96	1362.41	0.222117	-0.565083
baz2a	LL0000001806	ENSDARG00000102974	450079	1393.88	1842.51	1841.59	1617.23	1901.04	1962.92	0.849786	-0.110241
baz2ba	LL0000001807	ENSDARG00000057782	561095	3434.84	2817.67	2529.99	2509.12	2927.63	2331.64	0.739836	0.177016
bbc3	LL0000001808	ENSDARG00000069282	751763	220.909	253.835	164.044	146.842	174.696	172.135	0.537289	0.371748
bbip1	LL0000001809	ENSDARG00000071046	795943	485.804	387.123	305.629	235.538	275.784	374.588	0.47078	0.411755
bbox1	LL0000001810	ENSDARG00000036135	572649	260.008	667.42	430.615	214.842	241.434	175.069	0.0311387	1.10503
bbs1	LL0000001811	ENSDARG00000075169	568986	116.319	242.074	169.903	262.147	207.083	187.783	0.659804	-0.314574
bbs10	LL0000001812	ENSDARG00000069515	100034535	19.5494	51.9431	26.3642	50.2612	20.6102	41.0776	0.89126	-0.194133
bbs12	LL0000001813	ENSDARG00000016112	570583	27.3692	57.8234	56.6342	89.6818	41.2204	58.6822	0.680086	-0.418659
bbs2	LL0000001814	ENSDARG00000041621	259187	170.08	215.613	198.22	224.697	212.972	225.927	0.774108	-0.18456
bbs4	LL0000001815	ENSDARG00000063522	768303	69.4005	51.9431	72.2574	115.305	73.6078	78.243	0.545843	-0.464505
bbs5	LL0000001816	ENSDARG00000039827	393269	109.477	114.667	71.281	140.928	121.698	113.452	0.628171	-0.348247
bbs7	LL0000001817	ENSDARG00000059911	557491	150.531	218.553	143.538	240.465	222.786	187.783	0.580059	-0.344844
bbs9	LL0000001818	ENSDARG00000079217	100333716	216.021	202.872	277.312	408.003	355.28	196.586	0.450831	-0.463278
bbx	LL0000001819	ENSDARG00000012699	100005540	1197.4	1278	1121.94	784.469	1121.78	880.234	0.420789	0.36848
bcam	LL0000001820	ENSDARG00000090190	767689	973.562	893.813	825.101	2878.69	3065.03	4251.53	8.68744e-09	-1.92089
bcan	LL0000001821	ENSDARG00000099412	334113	68.4231	53.9032	52.7284	381.394	410.241	740.374	8.81467e-12	-3.12956
bcap29	LL0000001822	ENSDARG00000016231	554151	417.381	373.402	344.687	291.712	286.58	335.467	0.544337	0.313392
bcap31	LL0000001823	ENSDARG00000044972	368488	616.785	1038.86	974.499	771.657	626.157	509.557	0.372657	0.463569
bcar1	LL0000001824	ENSDARG00000056525	568309	1505.31	2044.4	1534.98	582.439	1042.29	737.44	0.00570093	1.10604
bcar3	LL0000001825	ENSDARG00000016981	570610	546.407	335.18	448.191	207.943	306.208	246.465	0.0784946	0.805938
bcas2	LL0000001826	ENSDARG00000043631	493614	624.605	1022.2	874.9	451.365	656.581	630.834	0.268003	0.536308
bcas3	LL0000001827	ENSDARG00000090764	393594	460.389	441.026	323.205	233.567	241.434	285.587	0.118355	0.687125
bcat1	LL0000001828	ENSDARG00000045568	337412	40.0764	45.0827	44.9168	265.103	115.81	215.168	3.19099e-05	-2.19614
bcat2	LL0000001829	ENSDARG00000054849	436949	806.415	803.648	644.458	369.568	596.714	915.443	0.708537	0.260739
bccip	LL0000001830	ENSDARG00000004948	541348	2951.97	1824.87	2167.72	668.178	1864.73	1734.06	0.228043	0.702664
bcdin3d	LL0000001831	ENSDARG00000074111	568375	4.88736	12.7408	26.3642	4.92757	4.90719	10.7584	0.53852	1.09488
bckdha	LL0000001832	ENSDARG00000040555	554124	340.16	628.217	596.612	361.684	469.127	529.118	0.768769	0.202602
bckdhb	LL0000001833	ENSDARG00000014676	569980	719.42	711.522	813.384	381.394	589.844	768.737	0.518281	0.367193
bckdhbl	LL0000001834	ENSDARG00000093569	555648	600.168	688.001	564.389	316.35	318.967	350.137	0.0113105	0.910644
bckdk	LL0000001835	ENSDARG00000016904	282677	1936.37	2026.76	1490.06	621.859	796.927	825.464	0.000208602	1.28086
bcl10	LL0000001836	ENSDARG00000077130	100334750	52.7835	49.0029	73.2339	94.6093	90.2922	37.1654	0.730192	-0.343353
bcl11aa	LL0000001837	ENSDARG00000061352	678650	386.102	1071.2	690.351	1282.15	567.271	1169.73	0.48975	-0.491386
bcl11ab	LL0000001838	ENSDARG00000063153	566491	746.789	1878.77	1222.52	1029.86	848.943	1039.65	0.51715	0.398927
bcl11ba	LL0000001839	ENSDARG00000062510	100093707	292.264	411.624	310.512	2033.12	996.159	2829.46	5.11251e-08	-2.52997
bcl2a	LL0000001840	ENSDARG00000094704	570772	2232.55	2598.13	2000.75	979.601	1435.84	1125.72	0.00860523	0.947959
bcl2b	LL0000001841	ENSDARG00000089109	100007048	43.0088	27.4416	41.9874	159.653	77.5335	396.105	0.000346186	-2.49374
bcl2l1	LL0000001842	ENSDARG00000008434	114401	3035.05	1387.76	2393.28	843.6	1703.77	1247.98	0.10126	0.844711
bcl2l10	LL0000001843	ENSDARG00000026766	373113	2409.47	1535.75	1307.47	755.889	1120.8	1004.44	0.0482374	0.866414
bcl2l11	LL0000001844	ENSDARG00000079144	100190951	820.099	837.95	709.88	283.828	425.944	251.356	0.00082749	1.30083
bcl2l13	LL0000001845	ENSDARG00000062370	559355	293.242	387.123	236.301	512.467	552.549	409.798	0.135932	-0.686073
bcl2l16	LL0000001846	ENSDARG00000114237	100359374	69.4005	60.7636	62.4929	85.7397	52.9976	67.4846	0.923763	-0.0981081
bcl3	LL0000001847	ENSDARG00000087832	565656	46.9187	36.2621	49.799	84.7542	122.68	37.1654	0.288283	-0.879129
bcl6aa	LL0000001848	ENSDARG00000070864	393707	146.621	176.41	113.268	284.814	303.264	222.993	0.0555985	-0.894518
bcl6ab	LL0000001849	ENSDARG00000069295	100001936	151.508	191.111	110.339	152.755	148.197	134.969	0.951001	0.0552986
bcl6b	LL0000001850	ENSDARG00000069335	793278	86.995	46.0627	26.3642	29.5654	13.7401	37.1654	0.331358	0.986258
bcl7a	LL0000001851	ENSDARG00000052907	57952	474.074	927.135	690.351	945.108	908.811	1427.93	0.197857	-0.649945
bcl7ba	LL0000001852	ENSDARG00000111877	406444	196.472	195.032	136.703	68.986	66.7377	64.5505	0.00296004	1.39913
bcl7bb	LL0000001853	ENSDARG00000040396	81595	384.147	638.018	453.073	216.813	327.8	320.796	0.104385	0.769459
bcl9	LL0000001854	ENSDARG00000036687	449616	1119.21	1414.22	1098.51	909.629	911.755	993.686	0.401352	0.367562
bcl9l	LL0000001855	ENSDARG00000055054	449532	584.528	620.377	547.789	325.22	380.798	490.975	0.214286	0.550132
bco1	LL0000001856	ENSDARG00000104256	84039	496.556	462.587	367.146	137.972	183.529	181.915	0.000326391	1.39753
bco1l	LL0000001857	ENSDARG00000103659	393580	75.2654	59.7835	18.5526	17.7393	21.5916	17.6047	0.125042	1.43176
bco2a	LL0000001858	ENSDARG00000055722	793849	66.4681	75.4645	137.68	105.45	75.5707	72.3748	0.888056	0.142122
bco2b	LL0000001859	ENSDARG00000041715	678554	45.9412	50.963	21.4819	49.2757	62.812	32.2752	0.808093	-0.286208
bco2l	LL0000001860	ENSDARG00000027620	84041	90.9049	72.5243	127.915	19.7103	65.7563	37.1654	0.0944147	1.24832
bcor	LL0000001861	ENSDARG00000017798	402921	1284.4	1505.37	1058.47	1306.79	1308.26	1140.39	0.957777	0.0352173
bcorl1	LL0000001862	ENSDARG00000077912	792710	175.945	217.573	244.113	264.118	226.712	244.509	0.746304	-0.205677
bcr	LL0000001863	ENSDARG00000079286	568320	407.606	584.115	584.894	619.888	309.153	615.186	0.972173	0.0299466
bcs1l	LL0000001864	ENSDARG00000012295	394157	91.8824	104.866	86.9042	83.7687	111.884	145.728	0.734369	-0.267335
bdh1	LL0000001865	ENSDARG00000059388	100037356	675.433	840.89	787.02	354.785	456.368	517.382	0.0430416	0.793869
bdh2	LL0000001866	ENSDARG00000052696	550507	225.796	251.875	189.432	67.015	195.306	254.29	0.669344	0.368756
bdkrb1	LL0000001867	ENSDARG00000020744	368199	2.93242	0.980058	9.76451	16.7537	1.96287	1.95607	1	-0.595398
bdkrb2	LL0000001868		100330960	15.6396	13.7208	8.78806	11.8262	17.6659	0.978037	0.888788	0.324415
bdnf	LL0000001869	ENSDARG00000018817	58118	144.666	220.513	128.892	544.989	357.243	421.534	0.00110417	-1.42188
bean1	LL0000001870	ENSDARG00000087413	101885923	107.522	146.029	93.7393	425.742	253.211	274.829	0.00154525	-1.45752
becn1	LL0000001871	ENSDARG00000079128	393846	84.0626	251.875	224.584	194.146	129.55	101.716	0.64499	0.397949
bend3	LL0000001872	ENSDARG00000076903	565716	449.637	541.972	346.64	210.9	244.378	188.761	0.0105096	1.05513
BEND4	LL0000001873	ENSDARG00000113607	566937	32.2566	6.86041	16.5997	32.522	20.6102	12.7145	0.89247	-0.240771
bend5	LL0000001874	ENSDARG00000075624	566161	390.989	325.379	273.406	361.684	332.707	369.698	0.876676	-0.10445
best1	LL0000001875	ENSDARG00000078331	560608	8.79725	12.7408	10.741	35.4785	24.5359	19.5607	0.239042	-1.30166
best2	LL0000001876	ENSDARG00000079163	567214	7.81978	7.84046	0.976451	24.6378	27.4802	11.7364	0.170883	-1.94055
best4	LL0000001877	ENSDARG00000078455	563711	19.5494	1.96012	23.4348	23.6523	31.406	22.4949	0.611495	-0.786882
bet1	LL0000001878	ENSDARG00000034885	415135	321.588	551.773	379.84	136.986	289.524	334.489	0.22695	0.719598
bet1l	LL0000001879	ENSDARG00000032037	445493	492.646	301.858	211.89	111.363	194.325	234.729	0.131995	0.897001
BFSP1	LL0000001881	ENSDARG00000074919	560018	46.9187	27.4416	16.5997	67.015	69.682	24.4509	0.42786	-0.825006
bfsp2	LL0000001882	ENSDARG00000011998	494090	31.2791	37.2422	11.7174	21.6813	11.7772	7.8243	0.467344	0.958964
bglapl	LL0000001884	ENSDARG00000104467	337724	65.4906	69.5841	108.386	29.5654	52.9976	6.84626	0.114479	1.44533
bgna	LL0000001885	ENSDARG00000017884	431774	117.297	504.73	221.654	89.6818	149.178	71.3967	0.034796	1.44323
bgnb	LL0000001886	ENSDARG00000002945	792197	11993.6	5251.15	4242.68	476.989	663.451	1089.53	5.39903e-10	3.26838
bhlha15	LL0000001887	ENSDARG00000045166	777671	4.88736	0	0	9.85514	7.8515	2.93411	1	-2.07806
bhlha9	LL0000001888	ENSDARG00000103981	323481	8.79725	0	2.92935	7.88411	6.87006	0.978037	1	-0.423569
bhlhe22	LL0000001889	ENSDARG00000058039	393930	27.3692	9.80058	18.5526	220.755	100.107	238.641	1.80109e-07	-3.32768
bhlhe23	LL0000001890	ENSDARG00000037588	559796	39.0989	15.6809	17.5761	583.424	268.914	179.959	3.08766e-09	-3.83451
bhlhe40	LL0000001891	ENSDARG00000004060	324413	2287.29	1956.2	2337.62	1694.1	1648.81	2124.3	0.574173	0.267523
bhlhe41	LL0000001892	ENSDARG00000041691	563771	1190.56	418.485	1086.79	289.741	1076.64	1698.85	0.872092	-0.185267
bhmt	LL0000001893	ENSDARG00000013430	322228	10535.2	12846.6	10510.5	1240.76	2915.85	1986.39	1.38486e-09	2.46394
bicc1a	LL0000001894	ENSDARG00000061682	568201	952.058	1256.43	969.616	259.19	261.062	131.057	3.73057e-08	2.2868
bicc1b	LL0000001895	ENSDARG00000070497	571411	3372.28	4775.82	3473.24	808.121	1287.65	547.701	4.78355e-07	2.13628
bicc2	LL0000001896	ENSDARG00000076557	402785	5.86483	13.7208	1.9529	37.4495	36.3132	44.0117	0.0173496	-2.45144
bicd1a	LL0000001897	ENSDARG00000079496	556758	83.0852	40.1824	56.6342	147.827	125.624	164.31	0.0205779	-1.2829
bicd2	LL0000039762	ENSDARG00000075571	557383	707.69	921.255	743.08	597.221	565.308	581.932	0.299045	0.443334
bicdl1	LL0000001900	ENSDARG00000074761	100537719	18.572	9.80058	17.5761	82.7832	77.5335	25.429	0.0173673	-2.01505
bicdl2	LL0000001901	ENSDARG00000052427	777640	236.548	71.5442	93.7393	74.8991	141.327	127.145	0.830834	0.226804
bicdl2l	LL0000001902	ENSDARG00000091669	100334848	41.0538	30.3818	73.2339	50.2612	65.7563	127.145	0.401199	-0.749185
bicra	LL0000001903	ENSDARG00000061159	386775	577.686	708.582	697.186	789.397	675.229	573.13	0.955242	-0.0389535
bicral	LL0000001904	ENSDARG00000016089	559084	586.483	531.191	524.354	520.351	516.236	583.888	0.976839	0.019057
bida	LL0000001905	ENSDARG00000069290	559425	442.795	393.983	327.111	147.827	167.826	147.684	0.000540372	1.32882
bik	LL0000001906	ENSDARG00000045549	564030	78.1978	34.302	41.9874	135.015	298.357	325.686	7.58438e-05	-2.29672
bin1a	LL0000001907	ENSDARG00000042114	563561	98.7247	129.368	150.374	751.947	611.435	1308.61	2.70914e-10	-2.81969
bin1b	LL0000001908	ENSDARG00000058820	447863	111.432	96.0457	70.3045	83.7687	103.051	44.9897	0.782172	0.26107
bin2a	LL0000001909	ENSDARG00000003219	492780	0	13.7208	8.78806	24.6378	18.6473	54.7701	0.133594	-2.12333
bin2b	LL0000001910	ENSDARG00000010255	327387	218.954	235.214	88.8571	56.1743	155.067	126.167	0.387914	0.68645
bin3	LL0000001911	ENSDARG00000099651	323976	476.029	527.271	530.213	356.756	443.61	661.153	0.927116	0.0693448
birc2	LL0000001912	ENSDARG00000044619	373107	2367.44	2143.39	1926.54	1130.38	1491.78	1603	0.118787	0.607453
birc5a	LL0000001913	ENSDARG00000075621	373110	376.327	388.103	324.182	221.741	463.238	482.172	0.901803	-0.100536
birc5b	LL0000001914	ENSDARG00000055655	246726	0	0.980058	0.976451	8.86963	7.8515	0	1	-3.09526
birc6	LL0000001915	ENSDARG00000074166	796547	860.176	536.092	834.866	663.251	879.368	582.91	0.925078	0.0699652
birc6-as2	LL0000001916	ENSDARG00000097706	101885944	56.6934	12.7408	55.6577	150.784	138.383	270.916	0.00160737	-2.16257
birc7	LL0000001917	ENSDARG00000058082	100073331	51.806	15.6809	54.6813	60.1164	53.979	44.9897	0.740306	-0.380806
bivm	LL0000001918	ENSDARG00000061409		36.1665	71.5442	36.1287	112.349	53.979	122.255	0.18173	-1.0046
blcap	LL0000001919	ENSDARG00000052073	57918	1369.44	839.91	991.098	521.337	858.757	852.849	0.311602	0.519317
blf	LL0000001920	ENSDARG00000043126	503516	2.93242	24.5015	28.3171	32.522	73.6078	61.6164	0.132828	-1.58927
blk	LL0000001921	ENSDARG00000007783	567764	35.189	12.7408	15.6232	37.4495	14.7216	54.7701	0.557258	-0.750797
blm	LL0000001922	ENSDARG00000077089	572540	82.1077	146.029	122.056	147.827	216.898	129.101	0.461103	-0.495864
blmh	LL0000001923	ENSDARG00000025977	336541	445.727	565.493	453.073	336.06	452.442	518.36	0.79649	0.164069
blnk	LL0000001924	ENSDARG00000042722	405764	6.84231	1.96012	2.92935	40.4061	36.3132	45.9678	0.000531165	-3.38629
bloc1s1	LL0000001925	ENSDARG00000014171	556597	217.976	135.248	129.868	95.5949	164.881	189.739	0.912886	0.101631
bloc1s2	LL0000001926	ENSDARG00000046081	606665	148.576	192.091	187.479	113.334	156.048	217.124	0.887888	0.118409
bloc1s3	LL0000001927	ENSDARG00000068828	553529	64.5132	57.8234	51.7519	82.7832	89.3108	94.8696	0.350622	-0.616848
bloc1s4	LL0000001928	ENSDARG00000007597	445081	206.247	205.812	211.89	152.755	173.714	207.344	0.722805	0.225058
bloc1s5	LL0000001929	ENSDARG00000111747	324781	115.342	84.285	120.104	84.7542	118.754	143.771	0.894169	-0.119281
bloc1s6	LL0000001930	ENSDARG00000042933	791215	654.906	521.391	451.121	193.161	334.67	352.093	0.0561857	0.887097
blvra	LL0000001931	ENSDARG00000059857	767661	54.7385	19.6012	25.3877	46.3192	28.4617	34.2313	0.929339	-0.128329
blvrb	LL0000001932	ENSDARG00000096829	436959	127.071	148.969	76.1632	110.378	86.3665	129.101	0.905025	0.112174
blzf1	LL0000001933	ENSDARG00000011299	114452	244.368	246.975	177.714	170.494	210.028	255.268	0.926719	0.0735328
bmb	LL0000001934	ENSDARG00000096603	559540	41.0538	40.1824	41.9874	55.1888	105.014	43.0336	0.392559	-0.721856
bmf2	LL0000001936	ENSDARG00000041414	751764	276.625	242.074	191.384	137.972	164.881	177.025	0.275522	0.565285
bmi1a	LL0000001937	ENSDARG00000006010	321505	257.075	355.761	241.183	265.103	207.083	294.389	0.823141	0.155818
bmi1b	LL0000001938	ENSDARG00000013076	394249	461.367	622.337	467.72	420.814	344.484	537.921	0.6727	0.251493
bmp10	LL0000001939	ENSDARG00000061769	562533	14.6621	0	1.9529	28.5799	10.7958	14.6706	0.385596	-1.70149
bmp10l	LL0000001940	ENSDARG00000109233		14.6621	13.7208	13.6703	30.5509	27.4802	5.86822	0.703562	-0.603398
bmp15	LL0000001941	ENSDARG00000037491	334183	6.84231	10.7806	15.6232	26.6089	14.7216	8.80234	0.725444	-0.592326
bmp16	LL0000001942	ENSDARG00000103679	100329171	610.92	851.67	603.447	178.378	142.308	188.761	6.4415e-08	2.01985
bmp1a	LL0000001943	ENSDARG00000028071	572452	3264.76	2824.53	2483.12	678.034	1232.68	891.97	1.55678e-05	1.61288
bmp1b	LL0000001944	ENSDARG00000028053	559877	192.562	173.47	146.468	107.421	121.698	154.53	0.493944	0.417709
bmp2a	LL0000001945	ENSDARG00000013409	30631	710.622	685.061	917.864	128.117	234.563	143.771	7.8982e-08	2.1916
bmp2b	LL0000001946	ENSDARG00000041430	30632	1059.58	1098.65	894.429	220.755	384.723	356.006	1.24459e-05	1.6667
bmp2k	LL0000001947	ENSDARG00000020009	494101	455.502	620.377	635.67	402.09	542.735	545.745	0.739924	0.199423
bmp3	LL0000001948	ENSDARG00000060526	777717	2988.13	4517.09	3660.72	700.7	1211.09	831.332	7.61924e-08	2.02521
bmp4	LL0000001949	ENSDARG00000019995	30612	1712.53	2999.96	2073.98	303.538	679.154	443.051	2.92762e-07	2.25093
bmp5	LL0000001950	ENSDARG00000101701	394026	1010.71	1240.75	1302.59	248.35	450.48	236.685	2.25012e-06	1.92563
bmp6	LL0000001951	ENSDARG00000015686	503761	148.576	297.938	163.067	75.8846	66.7377	93.8916	0.0100058	1.36583
bmp7a	LL0000001952	ENSDARG00000018260	30584	13.6846	40.1824	9.76451	26.6089	28.4617	32.2752	0.749859	-0.457181
bmp7b	LL0000001953	ENSDARG00000063230	557567	677.388	806.588	713.786	175.421	420.055	227.883	0.00197572	1.41643
bmp8a	LL0000001954	ENSDARG00000035677	561963	289.332	249.915	158.185	107.421	198.25	156.486	0.336255	0.593626
bmper	LL0000001955	ENSDARG00000101980	338246	1320.57	1944.44	1410	266.089	495.626	176.047	9.03357e-07	2.31768
bmpr1aa	LL0000001956	ENSDARG00000019728	58145	948.148	1993.44	1244	585.395	658.544	643.549	0.00640934	1.14895
bmpr1ab	LL0000001957	ENSDARG00000105045	447846	1150.48	2065.96	1354.34	610.033	812.63	522.272	0.00284204	1.23272
bmpr1ba	LL0000001958	ENSDARG00000104100	30742	579.641	658.599	499.943	240.465	354.299	192.673	0.00729775	1.14235
bmpr1bb	LL0000001959	ENSDARG00000102742	100149664	137.824	88.2052	77.1397	84.7542	111.884	100.738	0.977915	0.0278127
bmpr2a	LL0000001960	ENSDARG00000011941	562822	1470.12	2268.83	1766.4	1201.34	1258.2	1231.35	0.152409	0.576862
bmpr2b	LL0000001961	ENSDARG00000020057	555655	290.309	491.989	340.782	334.089	280.691	194.629	0.418757	0.472542
bms1	LL0000001962	ENSDARG00000054154	553241	407.606	396.924	495.061	241.451	381.779	259.18	0.253246	0.558535
bmt2	LL0000001963	ENSDARG00000062181	558558	311.814	421.425	335.899	180.349	170.77	266.026	0.0885153	0.792719
BNC1	LL0000001964	ENSDARG00000100757	568786	61.5808	185.231	150.374	191.19	124.643	166.266	0.756681	-0.279523
bnc2	LL0000001965	ENSDARG00000069989	559327	2111.34	4374	2934.24	1128.41	1082.53	924.245	5.69014e-05	1.58711
bnip1a	LL0000001966	ENSDARG00000078259	565822	30.3016	51.9431	55.6577	42.3771	28.4617	31.2972	0.675822	0.433227
bnip1b	LL0000001967	ENSDARG00000104280	795732	202.337	177.391	131.821	110.378	116.791	118.343	0.313092	0.566118
bnip2	LL0000001968	ENSDARG00000013397	394197	483.849	548.832	402.298	264.118	393.556	293.411	0.20162	0.593368
bnip3	LL0000001969	ENSDARG00000099961	336116	349.935	226.393	212.866	252.292	148.197	258.202	0.719713	0.260785
bnip3la	LL0000001970	ENSDARG00000025468	323563	1036.12	1235.85	928.605	585.395	601.621	850.893	0.119676	0.651226
bnip3lb	LL0000001971	ENSDARG00000028067	554650	535.655	816.388	756.75	352.814	310.134	221.036	0.00202709	1.25435
bnip4	LL0000001972	ENSDARG00000022832	568155	526.858	679.18	420.851	204.001	222.786	248.421	0.00126948	1.26868
bnipl	LL0000001973	ENSDARG00000060435	100149386	156.396	117.607	117.174	88.6963	181.566	176.047	0.823302	-0.190273
boc	LL0000001974	ENSDARG00000074335	334628	4263.73	9422.28	6007.13	2812.66	4190.74	2554.63	0.0233828	1.04291
bod1	LL0000001975	ENSDARG00000103922	767743	174.968	269.516	151.35	175.421	184.51	324.708	0.807032	-0.2005
bod1l1	LL0000001976	ENSDARG00000089505	100332682	198.427	131.328	127.915	173.45	198.25	107.584	0.943713	-0.0665346
boka	LL0000001977	ENSDARG00000052129	445218	208.202	215.613	183.573	67.015	67.7192	113.452	0.0079973	1.29109
bokb	LL0000001978	ENSDARG00000008807	394160	43.0088	39.2023	13.6703	37.4495	20.6102	23.4729	0.873514	0.233925
bola1	LL0000001979	ENSDARG00000039915	445163	179.855	195.032	161.114	103.479	102.069	209.3	0.615193	0.369569
BOLA2	LL0000001980	ENSDARG00000111714	553698	220.909	135.248	187.479	71.9425	152.123	219.08	0.737574	0.294794
bola3	LL0000001981	ENSDARG00000098130	445131	183.765	188.171	115.221	67.015	111.884	186.805	0.61362	0.413608
bop1	LL0000001982	ENSDARG00000063627	777627	274.67	168.57	306.606	161.624	298.357	199.52	0.815695	0.185223
bora	LL0000001983	ENSDARG00000042688	555606	31.2791	31.3619	62.4929	72.928	121.698	64.5505	0.157601	-1.05039
borcs5	LL0000001984	ENSDARG00000077830	449650	42.0313	51.9431	46.8697	48.2902	56.9233	73.3528	0.70924	-0.342449
borcs7	LL0000001985	ENSDARG00000055070	664759	75.2654	102.906	69.328	73.9135	31.406	89.0014	0.719863	0.348935
borcs8	LL0000001986	ENSDARG00000071339	558180	201.359	167.59	102.527	96.5804	116.791	209.3	0.8688	0.157572
bpgm	LL0000001987	ENSDARG00000070826	436903	129.026	256.775	165.02	214.842	125.624	165.288	0.889977	0.123153
bphl	LL0000001988	ENSDARG00000102877	402804	152.486	160.73	199.196	72.928	125.624	86.0673	0.11923	0.848251
bpifcl	LL0000001989	ENSDARG00000099980	100003132	14.6621	4.90029	24.4113	20.6958	38.276	27.385	0.447711	-0.973541
bpnt1	LL0000001990	ENSDARG00000043684	436627	123.162	167.59	171.855	92.6383	86.3665	152.574	0.473787	0.480366
bptf	LL0000001991	ENSDARG00000077361	324479	1176.88	1325.04	1364.1	1549.23	1685.13	1114.96	0.76628	-0.169935
braf	LL0000001992	ENSDARG00000017661	403065	422.268	800.707	472.602	746.034	540.772	647.461	0.783511	-0.190016
brap	LL0000001993	ENSDARG00000008560	436739	398.809	280.297	212.866	191.19	181.566	185.827	0.18678	0.675228
brat1	LL0000001994	ENSDARG00000062585	678547	176.923	129.368	215.796	135.015	251.248	138.881	0.992625	-0.00841182
brca2	LL0000001995	ENSDARG00000079015	566758	173.99	217.573	296.841	197.103	253.211	178.981	0.867877	0.129536
brcc3	LL0000001996	ENSDARG00000098242	100333845	269.782	335.18	225.56	181.335	187.454	211.256	0.308533	0.517822
brd1a	LL0000001997	ENSDARG00000013596	569574	146.621	199.932	135.727	286.785	195.306	200.498	0.384325	-0.501138
brd1b	LL0000001998	ENSDARG00000051798	100009661	969.653	870.292	822.172	1040.7	1025.6	801.991	0.855744	-0.107612
brd2a	LL0000001999	ENSDARG00000022280	30445	7505.03	9976.99	7055.84	3549.82	5346.87	1698.85	0.0154325	1.21155
brd2b	LL0000002000	ENSDARG00000046087	569354	116.319	65.6639	86.9042	114.32	89.3108	86.0673	0.909435	-0.10748
brd3a	LL0000002001	ENSDARG00000006527	327372	1181.76	1667.08	1475.42	1271.31	1177.72	1318.39	0.705308	0.19887
brd3b	LL0000002002	ENSDARG00000100129	327108	3809.21	4593.53	4039.58	2703.26	3598.93	3164.93	0.345221	0.394256
brd4	LL0000002003	ENSDARG00000078904	570531	3052.65	2561.87	2722.35	1981.87	2929.59	2279.81	0.684383	0.213259
brd7	LL0000002004	ENSDARG00000008380	406675	586.483	610.576	514.59	460.235	562.363	615.186	0.923128	0.0636241
brd8	LL0000002005	ENSDARG00000025071	337414	533.7	699.761	580.989	609.048	675.229	690.494	0.836274	-0.122164
brd9	LL0000002006	ENSDARG00000017143	393245	246.323	205.812	174.785	227.654	181.566	172.135	0.885023	0.108892
brdt	LL0000002007	ENSDARG00000102802	333996	4024.25	4379.88	4916.43	2403.67	4611.77	1805.46	0.280085	0.59466
brf1a	LL0000002008	ENSDARG00000017835	334402	177.9	160.73	171.855	82.7832	105.995	103.672	0.103463	0.803641
brf1b	LL0000002009	ENSDARG00000005002	334316	129.026	191.111	149.397	193.161	201.195	173.113	0.674212	-0.273317
brf2	LL0000002010	ENSDARG00000002060	445142	76.2428	33.322	12.6939	32.522	36.3132	38.1435	0.897977	0.192586
bri3	LL0000002011	ENSDARG00000086332	100002236	857.243	620.377	715.739	298.611	321.911	298.301	0.000363786	1.25529
bri3bp	LL0000002012	ENSDARG00000010108	327046	365.575	433.186	475.532	1646.79	902.922	1209.83	5.34792e-05	-1.56085
bricd5	LL0000002013	ENSDARG00000056247	792755	8.79725	13.7208	27.3406	58.1453	222.786	50.8579	0.00149929	-2.73426
brinp1	LL0000002014	ENSDARG00000078302	100334375	50.8286	28.4217	44.9168	339.017	135.438	674.846	7.60989e-07	-3.21037
brinp2	LL0000002015	ENSDARG00000014302	561009	109.477	99.9659	82.0219	575.54	328.781	549.657	4.13949e-08	-2.31862
brinp3a.1	LL0000002016	ENSDARG00000076351	569746	125.116	290.097	128.892	261.161	208.065	347.203	0.388616	-0.585491
brinp3a.2	LL0000002017	ENSDARG00000061051	100001603	106.544	53.9032	51.7519	147.827	69.682	133.991	0.339703	-0.728077
brinp3b	LL0000002018	ENSDARG00000075352	100330048	55.7159	62.7237	95.6922	104.464	86.3665	94.8696	0.58684	-0.415958
brip1	LL0000002019	ENSDARG00000074410	794038	162.26	149.949	145.491	189.219	200.213	122.255	0.832726	-0.160817
brk1	LL0000002020	ENSDARG00000041974	415187	1050.78	1340.72	1370.94	783.484	1012.84	1773.18	0.925112	0.0759305
brms1	LL0000002021	ENSDARG00000051955	791681	281.512	534.132	373.004	332.118	305.227	356.984	0.6879	0.25751
brms1la	LL0000002022	ENSDARG00000006235	792017	824.987	1167.25	903.218	713.512	630.083	724.726	0.258545	0.485325
brms1lb	LL0000002023	ENSDARG00000018047	562889	124.139	107.806	111.315	158.668	70.6635	106.606	0.975405	0.0311754
brox	LL0000002024	ENSDARG00000013659	492786	430.088	358.701	311.488	264.118	174.696	295.367	0.254696	0.58365
brpf1	LL0000002025	ENSDARG00000103665	393991	40.0764	53.9032	39.0581	60.1164	47.109	18.5827	0.954674	0.0807407
brpf3a	LL0000002026	ENSDARG00000070513	100149254	315.724	280.297	240.207	332.118	254.192	470.436	0.583846	-0.337685
brpf3b	LL0000002027	ENSDARG00000074238	100003354	392.944	661.539	295.865	280.871	250.266	334.489	0.248107	0.641489
brsk2b	LL0000002028	ENSDARG00000077791	100149571	50.8286	36.2621	32.2229	266.089	155.067	267.982	4.31833e-07	-2.53003
brwd1	LL0000002029	ENSDARG00000074747	798858	447.682	788.947	579.036	753.918	624.194	567.262	0.8887	-0.0995472
brwd3	LL0000002030	ENSDARG00000035540	553209	558.137	729.163	642.505	640.584	871.516	794.166	0.626887	-0.257115
bscl2	LL0000002031	ENSDARG00000037008	567403	491.669	714.462	581.965	296.64	253.211	399.039	0.030944	0.914086
bscl2l	LL0000002032	ENSDARG00000025912	541427	30.3016	12.7408	61.5164	43.3626	40.2389	117.364	0.381564	-0.942625
bsdc1	LL0000002033	ENSDARG00000052623	794882	892.432	1022.2	746.009	470.09	627.138	652.351	0.152527	0.604748
bsg	LL0000002034	ENSDARG00000019881	337692	4378.1	4528.85	5300.18	2630.34	1598.76	3275.45	0.0278144	0.920777
bsk146	LL0000002035	ENSDARG00000099069	405767	38.1214	39.2023	61.5164	280.871	204.139	427.402	7.38559e-08	-2.71623
bsna	LL0000002036		100004063	136.846	7.84046	41.9874	353.8	201.195	273.85	0.0127826	-2.15053
bsnb	LL0000002037	ENSDARG00000079161	101175706	138.801	104.866	186.502	1525.58	1029.53	2030.41	4.23176e-15	-3.41407
bsnd	LL0000002038	ENSDARG00000086265	497323	55.7159	3.92023	41.9874	27.5944	31.406	8.80234	0.727397	0.583993
bspry	LL0000002039	ENSDARG00000104875	559377	16.617	18.6211	40.0345	24.6378	37.2946	30.3192	0.829653	-0.293411
bsx	LL0000002040	ENSDARG00000068976	573364	7.81978	0.980058	8.78806	39.4206	13.7401	82.1551	0.012048	-2.94342
btaf1	LL0000002041	ENSDARG00000060089	565357	467.232	821.289	511.661	494.728	488.756	554.547	0.716385	0.227042
btbd10a	LL0000002042	ENSDARG00000062674	560466	460.389	598.815	338.829	675.077	670.322	676.802	0.260378	-0.53254
btbd10b	LL0000002043	ENSDARG00000020252	557247	1351.84	1126.09	1180.53	657.338	900.959	805.903	0.10314	0.629879
btbd11a	LL0000002044	ENSDARG00000063255	562893	565.957	702.702	683.516	229.625	349.392	397.083	0.0156256	0.999945
btbd11b	LL0000002045	ENSDARG00000063040	100034519	337.228	301.858	282.194	215.828	264.007	304.17	0.697283	0.232749
btbd16	LL0000002046	ENSDARG00000027710	565632	5.86483	0	1.9529	1.97103	10.7958	5.86822	1	-1.25309
btbd17a	LL0000002047	ENSDARG00000099321	563263	65.4906	56.8434	58.5871	147.827	51.0347	58.6822	0.582926	-0.509344
btbd17b	LL0000002048	ENSDARG00000102472	563672	63.5357	98.9859	142.562	172.465	111.884	129.101	0.564213	-0.438461
btbd18	LL0000002049		100538298	5.86483	0	11.7174	4.92757	8.83293	3.91215	1	-0.00718211
btbd2a	LL0000002050	ENSDARG00000042091	565970	441.818	562.553	437.45	552.873	542.735	985.862	0.314687	-0.529733
btbd2b	LL0000002051	ENSDARG00000104653	555499	830.852	1015.34	607.353	538.091	421.036	538.899	0.100926	0.711799
btbd3a	LL0000002052	ENSDARG00000005544	563691	567.911	929.095	762.609	397.162	334.67	405.886	0.0123006	0.989929
btbd3b	LL0000002053	ENSDARG00000087517	562593	24.4368	21.5613	23.4348	136.001	40.2389	208.322	0.000819469	-2.46954
btbd6a	LL0000002054	ENSDARG00000076440	100141360	750.699	1589.65	985.239	582.439	530.957	351.115	0.0102779	1.1832
btbd6b	LL0000002055	ENSDARG00000032369	553533	477.984	889.893	594.659	769.686	849.924	734.506	0.660748	-0.262475
btbd7	LL0000002056	ENSDARG00000003069	568372	893.41	1252.51	1078.98	746.034	891.145	836.222	0.399519	0.382753
btbd9	LL0000002057	ENSDARG00000068983	557659	366.552	307.738	250.948	175.421	268.914	217.124	0.370259	0.48415
btc	LL0000002058	ENSDARG00000098112	503869	66.4681	131.328	60.54	53.2178	109.921	109.54	0.947413	-0.0780699
btd	LL0000002059	ENSDARG00000099596	555376	109.477	129.368	111.315	47.3047	85.385	67.4846	0.185594	0.806685
btf3	LL0000002060	ENSDARG00000035400	556625	21423.3	12773.1	16899.4	5230.12	12733.2	9429.26	0.0662638	0.899421
btf3l4	LL0000002061	ENSDARG00000089681	393667	788.82	619.397	600.518	358.727	675.229	896.86	0.948471	0.057055
btg1	LL0000002062	ENSDARG00000027249	114432	24962.7	21851.4	20692	8061.5	15123	6261.4	0.00681363	1.19695
btg2	LL0000002063	ENSDARG00000020298	30079	59510.5	53921.8	36763.4	12755.5	20124.4	1109.09	0.129064	2.14371
btg3	LL0000002064	ENSDARG00000069065	492479	1469.14	1494.59	1242.05	660.294	927.458	661.153	0.0138247	0.903147
btk	LL0000002066	ENSDARG00000004433	568653	39.0989	54.8832	21.4819	26.6089	34.3503	78.243	0.838006	-0.26994
btr01	LL0000002067	ENSDARG00000051965	563047	29.3242	7.84046	33.1993	53.2178	37.2946	56.7262	0.285543	-1.06512
btr02	LL0000002068	ENSDARG00000052215	562439	24.4368	28.4217	35.1523	38.435	36.3132	86.0673	0.343086	-0.86975
btr04	LL0000039763	ENSDARG00000060962	565512	144.666	229.334	158.185	139.943	129.55	215.168	0.872831	0.134888
btr05	LL0000002070	ENSDARG00000074813	794264	29.3242	13.7208	8.78806	19.7103	41.2204	5.86822	0.843025	-0.365872
btr06	LL0000002071	ENSDARG00000054184	100151764	21.5044	1.96012	33.1993	26.6089	10.7958	3.91215	0.833767	0.456058
btr07	LL0000002072	ENSDARG00000105558	793570	0	7.84046	3.90581	14.7827	0.981437	1.95607	1	-0.593004
btr09	LL0000002073	ENSDARG00000054805	100170790	77.2203	16.661	28.3171	29.5654	26.4988	44.0117	0.839343	0.28811
btr12	LL0000002074	ENSDARG00000051809	767681	43.0088	13.7208	47.8461	84.7542	97.1623	106.606	0.0402554	-1.46404
btr16	LL0000002075	ENSDARG00000095113	767728	16.617	13.7208	26.3642	21.6813	21.5916	31.2972	0.775127	-0.395195
btr18	LL0000002076	ENSDARG00000100450	571162	25.4143	1.96012	4.88226	12.8117	13.7401	12.7145	0.903577	-0.28361
btr20	LL0000002077	ENSDARG00000102992	678596	4.88736	1.96012	0	1.97103	0	6.84626	1	-0.365073
btr22	LL0000002079	ENSDARG00000100539	100144555	0	10.7806	30.27	18.7248	20.6102	14.6706	0.867064	-0.395607
btr23	LL0000002080	ENSDARG00000099509	100334710	3.90989	15.6809	26.3642	14.7827	17.6659	13.6925	0.997504	-0.00578207
btr24	LL0000002081	ENSDARG00000105283	100000030	2.93242	0	0	6.8986	4.90719	0	1	-2.00896
btr25	LL0000002082	ENSDARG00000102018	571141	10.7522	4.90029	23.4348	24.6378	26.4988	27.385	0.437697	-1.00622
btr26	LL0000002083	ENSDARG00000105241	100149795	24.4368	1.96012	13.6703	19.7103	16.6844	14.6706	0.862411	-0.349751
btr29	LL0000002084	ENSDARG00000099138	797384	11.7297	7.84046	4.88226	13.7972	11.7772	2.93411	0.928627	-0.221193
btr30	LL0000002085	ENSDARG00000102591	393394	0	0	0	26.6089	0	0	1	-5.62348
btr31	LL0000002086	ENSDARG00000096304	555877	12.7071	6.86041	18.5526	15.7682	8.83293	9.78037	0.94403	0.149159
btr33	LL0000002088	ENSDARG00000008164	799840	6.84231	0	32.2229	36.464	23.5545	21.5168	0.571037	-1.06132
bub1	LL0000002089	ENSDARG00000077029	100307076	142.711	185.231	178.691	211.886	275.784	164.31	0.56314	-0.363876
bub1ba	LL0000002090	ENSDARG00000078825	567931	90.9049	135.248	107.41	100.522	156.048	108.562	0.881782	-0.130496
bub1bb	LL0000002091	ENSDARG00000074927	567006	103.612	143.088	151.35	167.537	273.821	215.168	0.175903	-0.721922
bub3	LL0000002092	ENSDARG00000075883	403012	491.669	737.984	678.634	494.728	939.235	589.757	0.912579	-0.0847395
buc	LL0000002093	ENSDARG00000096095	334375	31.2791	0	5.85871	28.5799	11.7772	13.6925	0.82056	-0.541232
buc2l	LL0000002094	ENSDARG00000096628	100537720	14.6621	19.6012	16.5997	27.5944	16.6844	6.84626	0.997504	-0.00718336
bud23	LL0000002095	ENSDARG00000063596	572367	354.822	235.214	313.441	94.6093	249.285	199.52	0.228912	0.733398
bud31	LL0000002096	ENSDARG00000017084	445383	795.663	746.804	571.224	457.278	663.451	1042.59	0.969069	-0.0335033
bves	LL0000002097	ENSDARG00000058548	415107	100.68	200.912	108.386	37.4495	33.3689	49.8799	0.00237568	1.76403
BX000363.1	LL0000002098	ENSDARG00000088631	100535969	28.3467	4.90029	3.90581	34.493	28.4617	26.407	0.354072	-1.2661
BX000364.1	LL0000002099	ENSDARG00000097977		5.86483	0.980058	0	8.86963	3.92575	12.7145	1	-1.89795
BX000434.1	LL0000002101	ENSDARG00000097338		0.977472	0.980058	4.88226	6.8986	10.7958	3.91215	1	-1.65905
BX000438.1	LL0000002102	ENSDARG00000097767		40.0764	27.4416	32.2229	52.2322	70.6635	124.211	0.0655194	-1.30894
BX000438.2	LL0000002103	ENSDARG00000098011		53.761	7.84046	41.011	62.0874	111.884	234.729	0.0209244	-1.9938
BX000447.1	LL0000002105	ENSDARG00000092245		0	3.92023	15.6232	1.97103	3.92575	5.86822	1	0.732045
BX000451.1	LL0000002106	ENSDARG00000097896	103911775	1.95494	9.80058	7.81161	9.85514	7.8515	7.8243	1	-0.383839
BX000460.1	LL0000002107	ENSDARG00000117649		0	9.80058	5.85871	7.88411	0.981437	0	1	0.821247
BX000463.2	LL0000002109	ENSDARG00000117817		0	0.980058	0.976451	8.86963	7.8515	0	1	-3.09526
BX000522.1	LL0000002110	ENSDARG00000117580		2.93242	0	4.88226	11.8262	10.7958	5.86822	1	-1.8657
BX000524.2	LL0000002112	ENSDARG00000105500	110439918	12.7071	1.96012	7.81161	6.8986	3.92575	2.93411	1	0.708631
BX000534.2	LL0000002114	ENSDARG00000096618		0	7.84046	0	11.8262	3.92575	3.91215	1	-1.32685
BX000701.1	LL0000002117	ENSDARG00000099172	101882267	20.5269	0	13.6703	19.7103	17.6659	3.91215	0.91953	-0.271607
BX000991.1	LL0000002126	ENSDARG00000092282		4.88736	0	4.88226	14.7827	0.981437	3.91215	1	-1.0096
BX001023.1	LL0000002129	ENSDARG00000098673		453.547	1592.59	832.913	271.016	275.784	148.662	0.000182352	2.04957
BX001023.2	LL0000002130	ENSDARG00000101163		9.77472	10.7806	3.90581	50.2612	18.6473	48.9019	0.0240888	-2.26805
BX001026.1	LL0000002131	ENSDARG00000095883		4.88736	0	5.85871	9.85514	0.981437	10.7584	1	-1.00666
BX001030.1	LL0000002132	ENSDARG00000093671	678538	87.9725	149.949	72.2574	122.204	105.995	293.411	0.327919	-0.749961
BX001050.1	LL0000002135	ENSDARG00000092943		0	0	3.90581	9.85514	7.8515	0.978037	1	-2.25744
BX004769.1	LL0000002137	ENSDARG00000097970		30.3016	39.2023	18.5526	11.8262	13.7401	42.0556	0.800175	0.380644
BX004774.2	LL0000002141	ENSDARG00000093753	100535624	58.6483	3.92023	23.4348	115.305	122.68	100.738	0.0281892	-1.97754
BX004785.1	LL0000002145	ENSDARG00000089713	103910198	2.93242	12.7408	9.76451	4.92757	8.83293	3.91215	1	0.525422
BX004785.2	LL0000002146	ENSDARG00000093487	100334219	33.2341	27.4416	23.4348	25.6234	26.4988	27.385	0.955429	0.0811785
BX004785.3	LL0000002147	ENSDARG00000103806	558300	24.4368	12.7408	24.4113	38.435	21.5916	29.3411	0.663685	-0.536945
BX004803.1	LL0000002149	ENSDARG00000096799		5.86483	0.980058	0	10.8407	10.7958	7.8243	1	-2.10559
BX004812.1	LL0000002150	ENSDARG00000096968		0	6.86041	13.6703	10.8407	1.96287	3.91215	1	0.296881
BX004816.1	LL0000002151	ENSDARG00000040497	571124	2.93242	13.7208	4.88226	11.8262	4.90719	10.7584	0.885691	-0.352435
BX004816.2	LL0000002152	ENSDARG00000087012	101883796	1.95494	0	0	14.7827	11.7772	7.8243	1	-4.13604
BX004823.1	LL0000002154	ENSDARG00000098535	101887093	0	3.92023	7.81161	0	8.83293	4.89019	1	-0.226306
BX004840.2	LL0000002156	ENSDARG00000095318		0	1.96012	8.78806	6.8986	0.981437	0	1	0.448469
BX004873.1	LL0000002158	ENSDARG00000100864		38.1214	77.4246	0	87.7107	20.6102	65.5285	0.758779	-0.589411
BX004970.1	LL0000002161	ENSDARG00000117726		0	0	1.9529	7.88411	0.981437	4.89019	1	-2.81543
BX004980.1	LL0000002164	ENSDARG00000099680		14.6621	0.980058	0	2.95654	0	7.8243	1	0.536784
BX004981.1	LL0000002165	ENSDARG00000092315	101884570	24.4368	4.90029	9.76451	25.6234	8.83293	7.8243	0.960836	-0.112461
BX004981.2	LL0000002166	ENSDARG00000092962		0	6.86041	14.6468	6.8986	0.981437	19.5607	1	-0.351615
BX004991.1	LL0000002167	ENSDARG00000096896		27.3692	51.9431	29.2935	67.015	59.8677	109.54	0.126678	-1.12241
BX004999.1	LL0000002169	ENSDARG00000096792	103910262	13.6846	40.1824	37.1052	49.2757	59.8677	81.1771	0.20929	-1.06503
BX005003.1	LL0000002171	ENSDARG00000098435	564205	109.477	147.009	162.091	952.992	378.835	1351.65	3.62304e-07	-2.68054
BX005005.1	LL0000002172	ENSDARG00000117551		24.4368	13.7208	20.5055	22.6668	30.4245	15.6486	0.882396	-0.228584
[truncated: 28,781 more rows]
