# Supplementary material for: An improved zebrafish transcriptome annotation for sensitive and comprehensive detection of cell type-specific genes
Source: eLife. 2020 Aug 24;9:e55792. doi: 10.7554/eLife.55792 (PMC7486121; doi:10.7554/eLife.55792)
Supplement: Figure 3—source data 8. — Gene expression levels were quantified using RSEM with the V4.3 annotation. Median ratio normalized expression values are shown for each replicate, along with adjusted p-value and log2 fold change. Matching Ensembl and NCBI gene IDs are included. Worksheet 2 – Nr2f2pos-enriched genes with matched entries from reference gene set (Figure 2—source data 2) and associated 3' UTR lengths (Figure 2—source data 2). [file elife-55792-fig3-data8.xlsx]

## Sheet: Fig3SourceData8
		Figure 3 Source Data 8
		worksheet 1 - DeSeq2 output for comparison of Nr2f2-positive and -negative cells; all detected genes
		worksheet 2 - Nr2f2-pos genes from reference gene set; includes 3' UTR lengths

## Sheet: Nr2f2posVnegV4.3.1
LLgeneID	ID	Ensdarg ID	NCBI ID	Nr2f2_y1_WT1	Nr2f2_y1_WT2	Nr2f2_y1_WT3	y1_WT1	y1_WT2	y1_WT3	padj	log2FoldChange
LL0000021130	otud5a	ENSDARG00000059006.7	555459	467.522	321.384	315.581	371.02	320.519	242.007	0.74008	-0.242548
LL0000030463	tmem121b	ENSDARG00000087319.3	796113	4.94209	26.5363	7.91425	7.8731	23.8157	23.7068	0.883594	0.491354
LL0000016977	LOC110437722		110437722	121.575	108.111	93.9817	86.6041	104.194	124.461	0.97592	-0.0380241
LL0000030862	tpd52	ENSDARG00000061713.9	559992	166.054	195.582	155.317	176.161	186.556	161.997	0.982871	0.0214242		Nr2f2pos-enriched	613
LL0000003763	BX936342.2	ENSDARG00000097724.2		12.8494	27.5191	44.5177	25.5876	18.8541	10.8656	0.775449	-0.617943		Nr2f2neg-enriched	858
LL0000020233	nexn	ENSDARG00000057317.9	573301	65.2356	46.1928	42.5391	5.90482	26.7927	39.5114	0.432659	-1.09255
LL0000017200	LOC110438137		110438137	19.7684	10.8111	24.732	0	13.8925	24.6946	0.905261	-0.51954		Nr2f2pos-enriched annotated in Ens95/RefSeq	523
LL0000030036	tbpl1	ENSDARG00000036868.5	403035	98.8418	67.815	56.389	74.7944	86.3319	80.0106	0.940102	0.112496		Nr2f2pos-enriched not annotated in Ens95	67
LL0000006913	CR788226.1	ENSDARG00000101399.2	108191968	0.988418	8.84543	5.93569	11.8096	9.9232	11.8534	0.715334	1.0904		Nr2f2pos-enriched not annotated in RefSeq	54
LL0000004818	calm2b	ENSDARG00000015050.9	192322	2411.74	1760.24	1718.38	2147.39	1531.15	1300.91	0.664528	-0.242354		Nr2f2pos-enriched not annotated in either	31
LL0000011478	gngt1	ENSDARG00000035798.6	335656	3.95367	0.982826	0.989281	23.6193	0	0	0.743778	1.99529
LL0000010867	frmd8	ENSDARG00000073696.5	559410	966.673	787.243	763.725	661.34	685.693	663.792	0.249517	-0.324283
LL0000008188	CU693471.1	ENSDARG00000104833.2	110439856	4.94209	2.94848	1.97856	2.95241	4.9616	13.829	0.764955	1.13954
LL0000035397	XLOC_025278			0.988418	2.94848	0	10.8255	0	0	1	1.45909
LL0000004912	carmil3	ENSDARG00000086990.5	100537031	143.321	148.407	90.0246	79.7151	113.125	85.9373	0.569044	-0.453663
LL0000006975	CR812481.1	ENSDARG00000091889.3		1.97684	5.89695	21.7642	9.84137	18.8541	7.90228	0.944797	0.304346
LL0000011547	gpc1a	ENSDARG00000019341.9	553367	66.224	74.6947	75.1854	145.652	95.2628	104.705	0.255807	0.677539
LL0000004905	card9	ENSDARG00000067672.5	796425	58.3167	30.4676	37.5927	213.558	104.194	122.485	0.00106524	1.80074
LL0000023873	rp9	ENSDARG00000098942.2	492481	62.2704	73.7119	53.4212	106.287	67.4778	86.9251	0.610825	0.460894
LL0000020183	neil3	ENSDARG00000020079.11	492463	341.993	226.05	224.567	246.034	231.211	257.812	0.911571	-0.108716
LL0000031597	ugt5e1	ENSDARG00000058048.7	100002993	21.7452	63.8837	70.239	19.6827	54.5776	70.1327	0.965933	-0.110445
LL0000030477	tmem135	ENSDARG00000069157.6	568244	77.0966	84.523	75.1854	88.5724	100.224	80.9984	0.867505	0.188089
LL0000031231	tsn	ENSDARG00000041830.6	334107	127.506	79.6089	58.3676	140.732	104.194	93.8396	0.762023	0.351727
LL0000034677	XLOC_019023			14.8263	0	18.7963	16.7303	0	0	0.894604	-1.00652
LL0000005049	ccdc167	ENSDARG00000045850.8	556080	12.8494	34.3989	30.6677	44.2862	32.7466	22.7191	0.871611	0.356383
LL0000023992	rps5	ENSDARG00000043453.7	192297	4698.94	2959.29	3212.2	6283.72	3808.53	4188.21	0.372933	0.393642
LL0000028090	si:dkeyp-106c3.1	ENSDARG00000090623.4	558820	3367.54	3193.2	3065.78	887.692	1369.4	1056.93	1.97247e-15	-1.53847
LL0000000418	adrb1	ENSDARG00000007490.9	557194	30.641	11.7939	10.8821	25.5876	21.831	37.5358	0.732883	0.672242
LL0000009834	etnppl	ENSDARG00000035544.8	393421	5.93051	10.8111	0.989281	0	12.9002	7.90228	0.969836	0.229935
LL0000009230	drosha	ENSDARG00000055563.6	567505	605.9	523.846	572.794	641.658	588.446	590.695	0.856115	0.0969189
LL0000017447	LOC110438541		110438541	26.6873	103.197	90.0246	52.1593	88.3165	78.035	0.997262	-0.00932758
LL0000000881	aldh9a1b	ENSDARG00000037061.5	399481	89.9461	86.4887	45.5069	103.334	71.4471	38.5236	0.976628	-0.057246
LL0000009822	esyt2b	ENSDARG00000078964.5	100330508	7.90735	26.5363	24.732	10.8255	11.9078	12.8412	0.745482	-0.73428
LL0000020487	notchl	ENSDARG00000088308.4	569522	725.499	788.226	841.879	555.053	616.231	493.892	0.029611	-0.500442
LL0000007269	cracr2b	ENSDARG00000053636.5	790936	7.90735	0.982826	0	10.8255	3.96928	8.89006	0.753644	1.41407
LL0000013924	LOC100003182		100003182	275.769	255.535	288.87	278.511	337.389	259.787	0.9072	0.0944645
LL0000008620	cyp8b1	ENSDARG00000053068.5	445281	11.861	9.82826	10.8821	0.984137	0.99232	0	0.0705851	-4.04273
LL0000017746	LOC110439563		110439563	6.91893	0	5.93569	8.85724	9.9232	0.987785	0.9194	0.62122
LL0000032686	XLOC_004075			31.6294	5.89695	2.96784	0	4.9616	4.93892	0.528904	-2.03261
LL0000012377	hspa4a	ENSDARG00000004754.11	335865	234.255	219.17	255.235	477.307	374.105	304.238	0.0349219	0.705593
LL0000022937	purba	ENSDARG00000068822.5	565233	253.035	223.101	197.856	283.432	203.426	167.923	0.969806	-0.0416681
LL0000019365	mlf1	ENSDARG00000077301.5	553527	45.4672	109.094	57.3783	14.7621	49.616	33.5847	0.303516	-1.11368
LL0000029562	stk36	ENSDARG00000061095.6	566154	88.9577	123.836	110.8	152.541	158.771	178.789	0.207797	0.598833
LL0000013470	krt94	ENSDARG00000044975.6	768289	107.738	102.214	128.607	249.971	132.971	189.655	0.139409	0.758238
LL0000003629	BX908780.5	ENSDARG00000096648.2		0	6.87978	5.93569	0	8.93088	1.97557	0.976398	-0.233298
LL0000031862	vipr1b	ENSDARG00000059058.6	503868	0	5.89695	7.91425	24.6034	13.8925	19.7557	0.309718	2.07642
LL0000029020	smug1	ENSDARG00000101308.3	570901	15.8147	49.1413	21.7642	27.5558	32.7466	30.6213	0.978747	0.0680151
LL0000002160	BX004962.2	ENSDARG00000095141.2		0.988418	10.8111	0	1.96827	9.9232	0.987785	0.987594	0.125454
LL0000031848	vgll4b	ENSDARG00000103730.3	406560	853.005	928.77	1076.34	885.724	926.827	948.274	0.933056	-0.0499616
LL0000021465	pcyox1	ENSDARG00000103052.2	550289	391.414	373.474	327.452	451.719	442.575	351.651	0.731515	0.18981
LL0000028258	si:dkeyp-77c4.1		108183668	5.93051	16.708	1.97856	0	0	0	0.104728	-5.49676
LL0000025975	si:ch211-281g13.4	ENSDARG00000075389.5	794323	12.8494	13.7596	5.93569	0	4.9616	20.7435	0.947839	-0.340507
LL0000001519	atcayb	ENSDARG00000059781.8	100329872	0	8.84543	15.8285	16.7303	10.9155	6.91449	0.920932	0.486221
LL0000025106	si:ch211-145b13.6	ENSDARG00000069998.7	100317105	706.719	627.043	596.537	154.51	171.671	133.351	8.72833e-22	-2.07064
LL0000013384	klhl11	ENSDARG00000045130.5	327313	114.657	129.733	125.639	118.096	138.925	169.899	0.821765	0.206284
LL0000034965	XLOC_021399			34.5946	68.7978	64.3033	91.5248	44.6544	92.8518	0.738697	0.449738
LL0000025407	si:ch211-196f5.9	ENSDARG00000096451.2	101884190	48.4325	37.3474	53.4212	34.4448	26.7927	57.2915	0.904347	-0.231797
LL0000025905	si:ch211-263m18.4	ENSDARG00000093353.3	327130	9.88418	3.9313	0.989281	3.93655	1.98464	0	1	-1.32172
LL0000018645	mapk8ip1a	ENSDARG00000102229.2	100537717	16.8031	45.21	33.6356	23.6193	29.7696	23.7068	0.888878	-0.311294
LL0000000111	ablim1a	ENSDARG00000060149.7	100003558	66.224	41.2787	92.9925	372.004	327.466	202.496	6.44816e-07	2.16968
LL0000029982	tatdn1	ENSDARG00000036924.7	100151626	16.8031	1.96565	7.91425	16.7303	23.8157	21.7313	0.555698	1.2231
LL0000003268	BX640549.1	ENSDARG00000098000.3	108182894	20.7568	53.0726	26.7106	38.3814	54.5776	68.1572	0.606586	0.680067
LL0000027270	si:dkey-238m4.4	ENSDARG00000093248.2		3.95367	1.96565	0	92.5089	56.5623	50.377	4.19748e-08	5.07422
LL0000021353	pcca	ENSDARG00000028982.10	437019	674.101	451.117	489.694	721.373	630.123	615.39	0.535453	0.284495
LL0000012389	hspb6	ENSDARG00000077236.4	792610	4.94209	10.8111	11.8714	0	1.98464	0	0.199159	-3.8022
LL0000010478	FO704721.1	ENSDARG00000113009.1	386940	13.8379	45.21	32.6463	20.6669	10.9155	9.87785	0.454618	-1.14498
LL0000026909	si:dkey-182g1.2	ENSDARG00000109368.1	100005482	13.8379	48.1585	30.6677	17.7145	12.9002	31.6091	0.789059	-0.574605
LL0000005721	ciz1b	ENSDARG00000089461.4	406846	41.5136	71.7463	80.1318	111.208	43.6621	80.9984	0.863639	0.286566
LL0000020885	onecut3b	ENSDARG00000091059.2	100332965	0	28.5019	29.6784	3.93655	14.8848	11.8534	0.817374	-0.923699
LL0000010930	ftr24	ENSDARG00000008396.11	619192	74.1314	70.7634	71.2283	133.843	66.4855	78.035	0.74501	0.365254
LL0000012949	itgb8	ENSDARG00000028222.10	556752	60.2935	61.918	58.3676	155.494	185.564	210.398	2.86214e-06	1.61057
LL0000011506	golga7ba	ENSDARG00000036295.9	550228	27.6757	26.5363	43.5284	6.88896	17.8618	29.6335	0.625345	-0.845863
LL0000000059	abcd2	ENSDARG00000059409.6	100537809	71.1661	93.3684	55.3998	77.7468	110.148	60.2549	0.912865	0.17396
LL0000017797	LOC110439629		110439629	5.93051	23.5878	34.6249	15.7462	14.8848	1.97557	0.725286	-0.976133
LL0000029246	spata2l	ENSDARG00000068814.6	100003387	187.799	146.441	160.264	105.303	112.132	194.594	0.792704	-0.263216
LL0000001842	bcl2l1	ENSDARG00000008434.10	114401	681.02	501.241	473.866	477.307	493.183	478.088	0.724419	-0.193169
LL0000008983	dlgap1b	ENSDARG00000037415.8	571372	53.3746	90.42	65.2926	67.9055	62.5162	82.9739	0.985831	0.0293438
LL0000002432	BX248418.1	ENSDARG00000096569.2		6.91893	4.91413	22.7535	2.95241	8.93088	25.6824	0.978413	0.119336
LL0000000464	agmo	ENSDARG00000025595.9	405819	42.502	19.6565	53.4212	49.2069	9.9232	59.2671	0.990401	0.0349899
LL0000024112	rwdd2b	ENSDARG00000055426.8	566444	102.796	105.162	84.0889	98.4137	80.378	46.4259	0.733457	-0.374859
LL0000031059	trhr2	ENSDARG00000093901.3	556431	0.988418	0	5.93569	8.85724	11.9078	5.92671	0.574472	1.94747
LL0000001067	ano1	ENSDARG00000102335.2	407698	162.101	165.115	149.381	28.54	83.3549	29.6335	0.00338288	-1.752
LL0000024053	rsl24d1	ENSDARG00000040439.5	406266	457.638	391.165	469.909	768.611	478.298	521.55	0.312637	0.423428
LL0000004163	CABZ01049625.1	ENSDARG00000116043.1		17.7915	34.3989	25.7213	7.8731	11.9078	5.92671	0.209854	-1.59999
LL0000002178	BX005012.4	ENSDARG00000097237.2		0	4.91413	9.89281	6.88896	0	4.93892	0.966239	-0.3237
LL0000001415	arrdc1a	ENSDARG00000068148.6	100006005	36.5715	51.1069	32.6463	16.7303	20.8387	40.4992	0.685373	-0.624237
LL0000028327	si:rp71-19m20.1	ENSDARG00000089828.4	570641	83.0271	77.6432	68.2604	117.112	66.4855	61.2427	0.951254	0.0970444
LL0000028688	slc31a1	ENSDARG00000013961.10	403028	243.151	326.298	351.195	248.987	349.297	323.006	0.999826	0.000954982
LL0000024824	si:ch1073-335m2.2	ENSDARG00000074332.6	322667	3022.58	3578.47	4313.27	4576.24	4899.09	2507.99	0.874122	0.134804
LL0000025394	si:ch211-195h23.3	ENSDARG00000068431.6	100170660	274.78	155.286	191.921	210.605	123.048	196.569	0.827792	-0.230175
LL0000027345	si:dkey-247k7.2	ENSDARG00000103199.2	797677	0	10.8111	12.8607	1.96827	6.94624	0	0.807285	-1.40944
LL0000021594	pelp1	ENSDARG00000079313.5	100003680	1105.05	969.066	1162.41	1408.3	1117.35	1481.68	0.309042	0.308228
LL0000023013	rab11a	ENSDARG00000041450.4	492487	1541.93	1189.22	1050.62	1112.08	1071.71	800.106	0.386931	-0.341864
LL0000032039	wdr75	ENSDARG00000040730.8	368478	197.684	169.046	148.392	388.734	348.304	374.371	1.22871e-05	1.10942
LL0000011866	gucd1	ENSDARG00000068438.4	564677	86.9808	114.008	128.607	123.017	109.155	99.7663	0.993345	0.0102468
LL0000020731	nudt4b	ENSDARG00000045878.7	447910	112.68	103.197	66.2819	89.5565	82.3626	89.8884	0.937716	-0.108022
LL0000024781	si:ch1073-174d20.2	ENSDARG00000079651.5	570430	167.043	188.703	151.36	195.843	235.18	183.728	0.658886	0.277627
LL0000039239	zgc:77739	ENSDARG00000017985.7	393870	65.2356	41.2787	14.8392	84.6358	34.7312	39.5114	0.862247	0.388796
LL0000020793	oard1	ENSDARG00000057426.4	553793	16.8031	17.6909	5.93569	17.7145	27.785	28.6458	0.628048	0.874662
LL0000026711	si:dkey-121n8.7	ENSDARG00000094067.5	108179098	0	9.82826	0	7.8731	15.8771	4.93892	0.757796	1.5446
LL0000025054	si:ch211-133l5.7	ENSDARG00000095633.2	564121	0	11.7939	0.989281	7.8731	0	0	1	-0.699031
LL0000017766	LOC110439587		110439587	0	87.4715	0	0	0	0	1	-21.4453
LL0000028793	slc48a1b	ENSDARG00000026109.9	792763	56.3398	83.5402	84.0889	130.89	96.2551	76.0594	0.644218	0.43702
LL0000000437	afdna	ENSDARG00000029472.11	558359	8470.75	8936.83	8969.81	4380.4	5296.01	5368.61	6.67608e-09	-0.810022
LL0000031227	tshz2	ENSDARG00000079201.4	100332862	270.827	258.483	290.849	180.097	182.587	188.667	0.0616782	-0.572914
LL0000030023	tbcd	ENSDARG00000098749.2	553265	236.232	255.535	224.567	286.384	284.796	209.41	0.881954	0.123908
LL0000035581	XLOC_026765			12.8494	11.7939	16.8178	5.90482	18.8541	21.7313	0.959245	0.165032
LL0000039857	LOC100005536	ENSDARG00000042887.7	100005536	307.398	217.204	272.052	291.305	250.065	304.238	0.922989	0.0861099
LL0000019600	mrps5	ENSDARG00000062209.7	562703	79.0735	162.166	178.071	198.796	200.449	152.119	0.663601	0.394957
LL0000031220	tsfm	ENSDARG00000060748.8	567785	35.5831	28.5019	17.8071	55.1117	18.8541	19.7557	0.943168	0.194844
LL0000025609	si:ch211-217k17.9	ENSDARG00000093494.4	798921	74.1314	147.424	77.164	37.3972	71.4471	49.3892	0.253282	-0.916986
LL0000040046	LOC795847	ENSDARG00000101296.2	795847	0	0	1.97856	9.84137	0	0	1	2.31525
LL0000009489	eif2b5	ENSDARG00000074995.5	563613	187.799	183.788	194.888	319.845	246.095	255.836	0.13235	0.536794
LL0000019543	mrpl23	ENSDARG00000045696.6	415142	174.95	154.304	186.974	253.907	224.264	169.899	0.596051	0.328201
LL0000031949	vwa5b2	ENSDARG00000075886.5	101882427	3.95367	17.6909	17.8071	14.7621	10.9155	6.91449	0.94148	-0.275567
LL0000021219	paip2b	ENSDARG00000008706.8	393739	794.688	465.859	552.019	920.168	553.715	495.868	0.913136	0.120023
LL0000007107	CR854980.1	ENSDARG00000103123.2	101885998	4.94209	15.7252	33.6356	12.7938	16.8694	22.7191	0.98859	-0.0519165
LL0000014632	LOC101882933		101882933	9.88418	1.96565	8.90353	5.90482	7.93856	0	0.920256	-0.584098
LL0000024501	serpinb14	ENSDARG00000091801.5	569051	392.402	408.855	294.806	356.258	347.312	241.02	0.764303	-0.214597
LL0000009535	eif4g3b	ENSDARG00000074331.7	568761	2233.83	2066.88	1751.03	1847.23	1858.62	1535.02	0.550619	-0.20755
LL0000011502	golga3	ENSDARG00000062511.8	570879	771.955	957.272	830.007	769.595	865.303	838.629	0.936527	-0.0491798
LL0000008570	cyp2aa7	ENSDARG00000103766.3	553537	16.8031	45.21	34.6249	24.6034	6.94624	26.6702	0.716151	-0.730923
LL0000026810	si:dkey-15j16.6	ENSDARG00000042698.6	100536356	41.5136	28.5019	20.7749	31.4924	18.8541	40.4992	0.999826	0.000995595
LL0000028070	si:dkey-9k7.3	ENSDARG00000089821.4	100148293	0.988418	28.5019	14.8392	55.1117	33.7389	19.7557	0.542974	1.29256
LL0000018963	mgat4b	ENSDARG00000004115.8	431727	18.7799	39.313	33.6356	44.2862	14.8848	30.6213	0.990401	-0.0306407
LL0000006408	CR383662.2	ENSDARG00000094597.2		207.568	156.269	139.489	0	12.9002	2.96335	2.06054e-10	-4.98995
LL0000038515	zgc:110366	ENSDARG00000004167.8	550476	21.7452	32.4332	41.5498	41.3338	32.7466	39.5114	0.900362	0.246916
LL0000010097	fam69b	ENSDARG00000117093.1	567731	10.8726	18.6737	14.8392	9.84137	9.9232	29.6335	0.962316	0.154292
LL0000022219	pnp5a	ENSDARG00000078619.5	791647	197.684	352.834	210.717	211.59	323.496	189.655	0.956493	-0.0709868
LL0000014526	LOC101882375		101882375	14.8263	1.96565	2.96784	22.6352	13.8925	0.987785	0.826553	0.925196
LL0000011684	gramd2aa	ENSDARG00000103736.2	555179	2.96526	28.5019	18.7963	0	3.96928	2.96335	0.222625	-2.85912
LL0000018812	me2	ENSDARG00000100718.2	445233	362.75	490.43	290.849	539.307	464.406	362.517	0.713346	0.256044
LL0000011749	gripap1	ENSDARG00000063069.7	791150	387.46	483.55	497.609	412.354	378.074	425.735	0.753499	-0.170378
LL0000032050	wdr93	ENSDARG00000087191.4	100149569	0	20.6393	3.95713	0	17.8618	2.96335	0.973826	-0.240652
LL0000021084	osbpl10b	ENSDARG00000040027.8	100319820	282.688	219.17	272.052	165.335	189.533	170.887	0.126621	-0.557771
LL0000031964	wasb	ENSDARG00000026350.7	335158	26.6873	8.84543	26.7106	301.146	286.781	187.679	7.74327e-14	3.63986
LL0000027194	si:dkey-225f5.5	ENSDARG00000055813.5	100000140	0	16.708	3.95713	0.984137	18.8541	1.97557	0.990401	0.0774125
LL0000005916	cnot4b	ENSDARG00000007639.7	394144	431.939	541.537	459.027	495.021	491.199	584.769	0.82058	0.133106
LL0000011355	gkup	ENSDARG00000069409.7	569254	83.0271	47.1756	49.4641	76.7627	64.5008	100.754	0.704214	0.429887
LL0000009892	ext2	ENSDARG00000056648.8	493780	650.379	655.545	684.583	443.846	604.323	627.243	0.560149	-0.248654
LL0000026545	si:ch73-40i7.5			20.7568	109.094	35.6141	53.1434	126.025	58.2793	0.788937	0.520843
LL0000013380	klhdc8b	ENSDARG00000090787.5	799189	182.857	73.7119	131.574	60.0324	81.3703	26.6702	0.132164	-1.20753
LL0000021845	pimr138	ENSDARG00000041550.9	560061	8.89577	13.7596	7.91425	6.88896	23.8157	8.89006	0.91581	0.37272
LL0000038034	XLOC_043716			3.95367	14.7424	17.8071	7.8731	5.95392	14.8168	0.926739	-0.349764
LL0000016498	LOC108181544		108181544	0	0	0	7.8731	0	4.93892	1	4.55637
LL0000011464	gnb4b	ENSDARG00000115383.1	492811	797.654	864.887	921.021	780.421	652.947	748.741	0.437317	-0.243609
LL0000030586	tmem246	ENSDARG00000061553.5	768199	148.263	160.201	172.135	76.7627	88.3165	115.571	0.0839176	-0.776087
LL0000001777	bag6l	ENSDARG00000077531.4	751663	682.009	598.541	618.301	665.277	565.623	658.853	0.991115	-0.00689055
LL0000011845	gtf3c2	ENSDARG00000004574.10	563394	163.089	190.668	174.114	226.352	220.295	202.496	0.564023	0.298322
LL0000007904	CU326364.1	ENSDARG00000096103.2		15.8147	0	0	2.95241	0	0	1	-2.42032
LL0000023518	RF00560	ENSDARG00000101659.2	101886388	9.88418	0	1.97856	0	8.93088	2.96335	0.999826	0.00365735
LL0000014208	LOC100334340		100334340	4.94209	13.7596	20.7749	3.93655	11.9078	12.8412	0.900911	-0.460888
LL0000031844	vgll2a	ENSDARG00000041706.6	556856	76.1082	73.7119	49.4641	22.6352	90.3012	95.8151	0.97621	0.0668169
LL0000027753	si:dkey-56m15.9	ENSDARG00000103281.2		0	18.6737	0	0	5.95392	0	0.867172	-1.64979
LL0000001066	anln	ENSDARG00000060917.8	562517	3540.51	3604.02	3998.68	2505.61	2856.89	2727.27	0.00255092	-0.461999
LL0000025888	si:ch211-260p9.3	ENSDARG00000092862.2	566550	14.8263	1.96565	3.95713	104.319	69.4624	41.487	0.000472549	3.37558
LL0000025804	si:ch211-244o22.2	ENSDARG00000068759.5	561487	1010.16	790.192	920.032	881.787	695.617	891.97	0.79454	-0.139625
LL0000037822	XLOC_043092			10.8726	21.6222	7.91425	7.8731	0	0.987785	0.445117	-2.1881
LL0000004712	CABZ01113954.1	ENSDARG00000099653.2	393518	1579.49	1158.75	1118.88	1569.7	1322.76	1034.21	0.974913	0.0257964
LL0000025721	si:ch211-232i5.3	ENSDARG00000086874.4	100330978	58.3167	101.231	36.6034	10.8255	48.6237	24.6946	0.312693	-1.22142
LL0000000093	abhd2a	ENSDARG00000025797.8	393888	140.355	182.806	184.006	316.892	257.011	208.423	0.140622	0.625319
LL0000009622	EML5	ENSDARG00000053517.8	570011	0	6.87978	16.8178	0	17.8618	2.96335	0.979803	-0.186687
LL0000008468	cx36.7	ENSDARG00000017927.8	100005880	0	17.6909	15.8285	0	26.7927	27.658	0.904403	0.699791
LL0000009816	esrrga	ENSDARG00000004861.9	405890	85.004	92.3856	100.907	81.6834	63.5085	100.754	0.888682	-0.178206
LL0000015864	LOC103910418		103910418	5.93051	10.8111	0.989281	6.88896	9.9232	2.96335	0.97516	0.156953
LL0000023239	rassf2b	ENSDARG00000044044.7	100006341	1.97684	4.91413	1.97856	37.3972	17.8618	17.7801	0.0208543	3.04105
LL0000035430	XLOC_025495			35.5831	18.6737	39.5713	24.6034	134.956	52.3526	0.355728	1.17535
LL0000037712	XLOC_042669			13.8379	7.8626	0	0.984137	8.93088	19.7557	0.93859	0.451173
LL0000012711	im:7142702	ENSDARG00000116556.1	100330974	13.8379	55.0382	38.582	77.7468	77.401	77.0472	0.2312	1.11138
LL0000029222	spaca4l	ENSDARG00000116617.1	100334363	78.0851	341.04	203.792	19.6827	128.009	102.73	0.229171	-1.31481
LL0000001174	apnl	ENSDARG00000090900.3	100002992	12.8494	6.87978	0.989281	0	0	5.92671	0.750865	-1.80555
LL0000038398	zdhhc8a	ENSDARG00000042872.7	555918	5.93051	45.21	77.164	65.9372	106.178	104.705	0.437073	1.10937
LL0000007171	CR925773.1	ENSDARG00000086266.3	798445	14.8263	16.708	15.8285	24.6034	18.8541	14.8168	0.909023	0.29916
LL0000024366	sec13	ENSDARG00000054807.6	798071	367.692	340.058	216.653	471.402	298.688	309.177	0.799649	0.223481
LL0000009093	dnal4b	ENSDARG00000088841.5	100005529	10.8726	14.7424	31.657	27.5558	25.8003	38.5236	0.704869	0.682076
LL0000029064	snrka	ENSDARG00000070832.7	436661	493.221	506.155	480.791	408.417	501.122	479.076	0.881262	-0.0921602
LL0000020679	ntan1	ENSDARG00000105182.2	393824	5.93051	18.6737	6.92497	35.4289	8.93088	14.8168	0.71529	0.908227
LL0000002005	brd8	ENSDARG00000025071.8	337414	1041.79	973.98	903.214	984.137	1061.78	853.446	0.98859	-0.00974309
LL0000040186	si:ch73-287m6.1	ENSDARG00000104101.2	100535071	5.93051	26.5363	49.4641	14.7621	25.8003	42.4748	0.995044	0.0193324
LL0000038814	zgc:158803	ENSDARG00000019765.11	100038767	313.329	350.869	321.516	365.115	346.32	431.662	0.665286	0.213698
LL0000012875	irgq1	ENSDARG00000086847.4	565312	96.865	58.9695	74.1961	36.4131	18.8541	31.6091	0.0367369	-1.4045
LL0000009555	elf2a	ENSDARG00000019459.9	445489	467.522	331.212	489.694	487.148	426.698	386.224	0.98859	0.0130377
LL0000031131	trim9	ENSDARG00000039123.6	336099	16.8031	33.4161	22.7535	13.7779	5.95392	18.7679	0.612694	-0.922378
LL0000011908	h3f3d	ENSDARG00000045248.7	394076	1721.82	1199.05	1202.97	1594.3	1040.94	1162.62	0.878808	-0.118772
LL0000024594	sgk3	ENSDARG00000062460.5	564523	163.089	171.994	107.832	77.7468	80.378	80.0106	0.0567755	-0.89531
LL0000027279	si:dkey-239i20.2	ENSDARG00000043518.6	557525	7.90735	33.4161	25.7213	27.5558	25.8003	39.5114	0.83512	0.469907
LL0000013088	kbtbd8	ENSDARG00000070698.6	559966	295.537	408.855	279.967	253.907	312.581	290.409	0.773996	-0.200153
LL0000029624	stx6	ENSDARG00000042742.10	550577	123.552	104.18	99.9174	213.558	100.224	106.681	0.735541	0.359941
LL0000024115	rx2	ENSDARG00000040321.9	30473	0	1.96565	4.94641	10.8255	27.785	22.7191	0.0734811	3.14962
LL0000038862	zgc:162962	ENSDARG00000116765.1	798203	68.2009	78.626	112.778	49.2069	76.4087	95.8151	0.874987	-0.229499
LL0000012790	insm1a	ENSDARG00000091756.4	402941	28.6641	36.3645	85.0782	71.842	145.871	96.8029	0.233489	1.06718
LL0000005942	cntn3a.1	ENSDARG00000062880.8	569437	0.988418	14.7424	23.7428	32.4765	22.8234	18.7679	0.734482	0.908008
LL0000019963	naglu	ENSDARG00000030156.7	560126	117.622	215.239	237.428	142.7	170.679	161.997	0.786825	-0.262668
LL0000010232	fbxw2	ENSDARG00000009745.11	553942	190.765	171.994	166.199	173.208	151.825	133.351	0.784556	-0.206557
LL0000026680	si:dkey-119f1.1	ENSDARG00000058719.9	557127	379.553	310.573	332.399	276.543	336.397	338.81	0.889883	-0.103496
LL0000022831	ptgesl	ENSDARG00000068415.6	799964	64.2472	70.7634	75.1854	128.922	82.3626	80.9984	0.569594	0.47573
LL0000023579	rfx3	ENSDARG00000014550.10	570989	384.495	314.504	436.273	309.019	356.243	450.43	0.978658	-0.0250778
LL0000036733	XLOC_035147			22.7336	3.9313	5.93569	8.85724	13.8925	9.87785	0.999826	0.00126953
LL0000038263	ypel1	ENSDARG00000035630.4	554488	652.356	408.855	446.166	595.403	466.391	487.966	0.966194	0.0400508
LL0000039069	zgc:174938	ENSDARG00000075622.3	100126020	85.004	143.493	71.2283	13.7779	57.5546	48.4015	0.14552	-1.32409
LL0000009773	erfl1	ENSDARG00000086892.4	558126	15.8147	7.8626	16.8178	4.92069	7.93856	13.829	0.840756	-0.601484
LL0000024580	sfxn5a	ENSDARG00000103595.2	562654	17.7915	21.6222	14.8392	7.8731	5.95392	2.96335	0.288846	-1.69196
LL0000038702	zgc:153012	ENSDARG00000068912.4	777626	260.942	248.655	262.16	362.163	313.573	285.47	0.447626	0.31674
LL0000019483	mpi	ENSDARG00000030786.12	613246	245.128	182.806	250.288	243.082	256.019	242.995	0.873157	0.129901
LL0000009692	epb41l4b	ENSDARG00000061398.7	100332627	56.3398	52.0898	43.5284	23.6193	22.8234	13.829	0.0920374	-1.33413
LL0000037285	XLOC_039754			0	9.82826	3.95713	0	0	0	1	-4.66018
LL0000023576	rfx1a	ENSDARG00000005883.11	100038773	208.556	173.96	303.709	303.114	320.519	286.458	0.453888	0.407387
LL0000002175	BX005012.1	ENSDARG00000087679.4	100333000	7.90735	3.9313	7.91425	6.88896	7.93856	14.8168	0.867228	0.585912
LL0000040257	tom1l2b	ENSDARG00000009217.12	560327	912.31	965.135	1111.95	890.644	951.635	950.249	0.837808	-0.0982824
LL0000031200	trpm7	ENSDARG00000036232.8	280653	414.147	766.604	670.733	609.181	760.117	633.17	0.903527	0.113059
LL0000011831	gtf2b	ENSDARG00000103578.2	324823	122.564	78.626	126.628	170.256	174.648	142.241	0.313535	0.571556
LL0000021361	pcdh17	ENSDARG00000027041.11	561336	2049.98	2537.66	2161.58	808.961	1420.01	1094.47	4.49263e-05	-1.02208
LL0000015065	LOC101885180		101885180	11.861	6.87978	32.6463	19.6827	9.9232	33.5847	0.929084	0.298614
LL0000035922	XLOC_029220			50.4093	40.2959	30.6677	31.4924	28.7773	30.6213	0.779982	-0.417217
LL0000029564	stk38b	ENSDARG00000018516.10	100332206	566.364	433.426	406.595	503.878	497.153	488.954	0.91138	0.0833196
LL0000018394	lrrc75ba	ENSDARG00000074308.5	101885211	57.3283	16.708	30.6677	40.3496	33.7389	43.4625	0.944612	0.167158
LL0000001062	anks3	ENSDARG00000038557.8	100136846	188.788	177.891	165.21	151.557	206.403	161.997	0.974139	-0.0328171
LL0000001274	arhgap23a	ENSDARG00000052950.8	100006233	2769.55	3043.81	2832.31	2280.25	2748.73	2272.89	0.317722	-0.24373
LL0000027196	si:dkey-225n22.4	ENSDARG00000077245.5	792513	0	6.87978	3.95713	1.96827	6.94624	9.87785	0.888878	0.793684
LL0000039804	fbxo11b	ENSDARG00000061631.7	567742	1790.03	1654.1	1673.86	1709.45	1628.4	1650.59	0.936338	-0.0369791
LL0000013497	l3mbtl4		100331457	34.5946	38.3302	53.4212	64.9531	33.7389	47.4137	0.911668	0.209831
LL0000013928	LOC100004016			13.8379	15.7252	0	7.8731	16.8694	0	0.969077	-0.257047
LL0000005510	cfap46		101884204	0.988418	19.6565	38.582	36.4131	21.831	20.7435	0.912456	0.415464
LL0000008165	CU660013.4	ENSDARG00000096803.2		118.61	149.389	121.682	85.6199	84.3472	75.0717	0.17804	-0.669334
LL0000011465	gnb5a	ENSDARG00000099685.2	562813	4.94209	1.96565	20.7749	0	3.96928	0	0.488793	-2.80357
LL0000012964	itm2ca	ENSDARG00000043448.5	436822	0	6.87978	20.7749	3.93655	0.99232	4.93892	0.742906	-1.48634
LL0000026783	si:dkey-152b24.7	ENSDARG00000099715.2	100000352	13.8379	27.5191	4.94641	10.8255	7.93856	7.90228	0.775871	-0.796242
LL0000039174	zgc:56622	ENSDARG00000099728.2	326033	14.8263	7.8626	15.8285	7.8731	0	20.7435	0.929882	-0.4284
LL0000038689	zgc:152774	ENSDARG00000104408.2	553526	45.4672	138.578	121.682	316.892	219.303	173.85	0.0493556	1.21563
LL0000027116	si:dkey-217d24.6	ENSDARG00000096428.4	556689	380.541	276.174	312.613	496.005	437.613	440.552	0.105824	0.503561
LL0000011942	haus5	ENSDARG00000019156.9	492797	220.417	132.681	180.049	168.287	114.117	189.655	0.878787	-0.175455
LL0000023898	rpl12	ENSDARG00000006691.9	327089	3233.12	1449.67	1464.14	3343.11	1833.81	2249.19	0.764602	0.272754
LL0000018144	LOC562648		562648	0	0	0	53.1434	34.7312	0	0.424716	7.33409
LL0000022854	ptk2bb	ENSDARG00000039577.9	245950	148.263	245.706	158.285	149.589	114.117	101.742	0.317722	-0.59568
LL0000006960	CR792438.2	ENSDARG00000096409.4	103910255	10.8726	1.96565	3.95713	0.984137	3.96928	12.8412	0.98859	0.0834959
LL0000023813	rnf220a	ENSDARG00000060929.8	561654	817.422	741.051	863.643	671.182	620.2	696.388	0.299229	-0.285083
LL0000037981	XLOC_043545			29.6526	16.708	26.7106	46.2545	20.8387	34.5725	0.793557	0.476765
LL0000028550	slc1a9	ENSDARG00000098269.2	100463516	37.5599	44.2272	33.6356	32.4765	63.5085	53.3404	0.804907	0.37132
LL0000039052	zgc:174698	ENSDARG00000098236.2	100141499	13.8379	0	12.8607	0	8.93088	2.96335	0.843121	-1.16683
LL0000007197	CR931802.3	ENSDARG00000106245.2		14.8263	0	0	0	0	0	1	-4.76499
LL0000020662	nsun2	ENSDARG00000056665.8	325292	222.394	169.046	215.663	307.051	264.95	295.348	0.158734	0.514758
LL0000000462	aglb	ENSDARG00000100352.2	553352	6.91893	3.9313	5.93569	0	5.95392	9.87785	0.98859	-0.0845793
LL0000024924	si:ch211-110p13.9	ENSDARG00000093821.4	562347	59.3051	72.7291	71.2283	68.8896	80.378	73.0961	0.923809	0.129502
LL0000022059	plaa	ENSDARG00000042728.7	324855	433.916	311.556	342.291	490.1	315.558	253.861	0.973826	-0.0378932
LL0000029023	smx5	ENSDARG00000070867.6	57924	12.8494	5.89695	13.8499	58.0641	10.9155	11.8534	0.513958	1.31065
LL0000018571	MANEAL	ENSDARG00000056450.4	566679	19.7684	18.6737	22.7535	1.96827	3.96928	12.8412	0.332479	-1.70439
LL0000039523	znf1147	ENSDARG00000100652.2	100141494	2.96526	0	6.92497	9.84137	4.9616	0.987785	0.917827	0.675616
LL0000004477	CABZ01078733.1	ENSDARG00000111595.1		0	18.6737	16.8178	4.92069	7.93856	2.96335	0.778843	-1.16573
LL0000024193	samsn1a	ENSDARG00000054543.8	336695	21.7452	15.7252	8.90353	169.272	71.4471	72.1083	7.52222e-05	2.75401
LL0000011846	gtf3c3	ENSDARG00000043247.6	553318	197.684	179.857	214.674	186.986	244.111	233.117	0.829128	0.165507
LL0000034009	XLOC_014488			35.5831	35.3817	53.4212	47.2386	32.7466	41.487	0.986171	-0.0340186
LL0000026842	si:dkey-169i5.4	ENSDARG00000077862.5	796658	21.7452	33.4161	14.8392	0	4.9616	10.8656	0.283846	-2.14536
LL0000029455	st14a	ENSDARG00000061173.9	678603	272.803	543.503	303.709	143.684	277.85	192.618	0.10143	-0.866965
LL0000039050	zgc:174690		100191016	0	25.5535	0	0	24.808	20.7435	0.951254	0.833883
LL0000023402	rerea	ENSDARG00000077353.6	569081	5144.72	5103.81	5583.5	4190.46	4763.14	4634.69	0.28066	-0.220487
LL0000021981	pip4p1a	ENSDARG00000038615.9	556136	85.004	71.7463	69.2497	99.3979	60.5315	75.0717	0.969319	0.0564818
LL0000010252	fem1b	ENSDARG00000062636.6	567119	256.989	148.407	209.728	112.192	141.902	207.435	0.607337	-0.414434
LL0000014825	LOC101883970			42.502	37.3474	52.4319	0	17.8618	39.5114	0.622881	-1.20526
LL0000009027	dnah2	ENSDARG00000087352.4	556023	136.402	132.681	108.821	120.065	167.702	194.594	0.6385	0.352017
LL0000009452	egln1a	ENSDARG00000038996.7	100329385	113.668	154.304	163.231	54.1276	53.5853	80.9984	0.0101585	-1.19219
LL0000020132	ndufaf7	ENSDARG00000033134.9	767796	10.8726	18.6737	45.5069	42.3179	50.6083	39.5114	0.587494	0.81943
LL0000009646	enkur	ENSDARG00000031248.6	402794	45.4672	36.3645	43.5284	54.1276	60.5315	63.2182	0.606836	0.504846
LL0000026140	si:ch211-76m11.5	ENSDARG00000100006.3		4.94209	16.708	8.90353	10.8255	3.96928	30.6213	0.874337	0.571734
LL0000022944	pus7l	ENSDARG00000069780.7	561376	35.5831	28.5019	15.8285	39.3655	65.4931	20.7435	0.704178	0.652194
LL0000001624	atp6ap1b	ENSDARG00000037153.8	195824	325.19	281.088	298.763	404.48	360.212	305.226	0.633472	0.241485
LL0000008227	CU855552.1	ENSDARG00000115872.1		35.5831	22.605	47.4855	40.3496	34.7312	63.2182	0.819783	0.388362
LL0000038310	zbtb25	ENSDARG00000042383.8	567401	6.91893	14.7424	1.97856	3.93655	0	0	0.545826	-2.5848
LL0000038926	zgc:171566	ENSDARG00000105118.3	563836	26.6873	74.6947	58.3676	42.3179	62.5162	46.4259	0.969319	-0.0789665
LL0000029409	srsf6b	ENSDARG00000016783.8	494133	1526.12	1588.25	1835.12	1888.56	1906.25	2101.02	0.307004	0.252423
LL0000031986	wdfy3	ENSDARG00000078890.6	568432	2734.95	2955.36	3017.31	1998.78	2311.11	2110.9	0.0053366	-0.43954
LL0000011513	golt1a	ENSDARG00000088933.3	100001834	17.7915	11.7939	2.96784	0	20.8387	8.89006	0.981187	-0.131296
LL0000000332	adgrb1a	ENSDARG00000075133.4	563527	85.004	93.3684	149.381	242.098	205.41	165.948	0.0578376	0.90443
LL0000033826	XLOC_013240			0	226.05	15.8285	79.7151	72.4394	77.0472	0.991351	-0.0776759
LL0000005230	cd248b	ENSDARG00000077938.5	100002565	4381.66	4331.31	3889.85	4598.87	4975.49	4771	0.393651	0.186831
LL0000006614	CR405715.1	ENSDARG00000092510.3	103909162	39.5367	79.6089	38.582	28.54	62.5162	0	0.802038	-0.792746
LL0000004863	camta1b	ENSDARG00000007824.11	497465	14.8263	52.0898	73.2068	106.287	90.3012	80.0106	0.348696	0.981111
LL0000008420	CU984600.1	ENSDARG00000078172.5	101883373	82.0387	34.3989	58.3676	70.8579	65.4931	79.0228	0.835176	0.301243
LL0000018499	lzts2a	ENSDARG00000074597.6	570926	1677.35	1318.95	1581.86	805.024	759.125	782.326	9.73413e-09	-0.964248
LL0000033779	XLOC_012946			0	14.7424	0	13.7779	17.8618	25.6824	0.567727	1.95838
LL0000008948	diras1b	ENSDARG00000009372.10	565395	13.8379	9.82826	7.91425	5.90482	2.97696	0.987785	0.514463	-1.67751
LL0000037932	XLOC_043418			16.8031	10.8111	2.96784	27.5558	40.6851	29.6335	0.197522	1.67809
LL0000030258	thbd	ENSDARG00000092470.5	108180329	607.877	521.88	422.423	189.938	178.618	145.204	7.78679e-10	-1.59512
LL0000017823	LOC110439786		110439786	0	6.87978	12.8607	2.95241	6.94624	16.7923	0.937581	0.435175
LL0000014453	LOC101882015		101882015	0.988418	21.6222	26.7106	12.7938	17.8618	7.90228	0.932262	-0.355306
LL0000001085	anp32b	ENSDARG00000023330.10	322000	1004.23	1025.09	923.989	1507.7	1044.91	1048.04	0.457355	0.285945
LL0000028136	si:dkeyp-13d12.23	ENSDARG00000104518.2		0	11.7939	12.8607	1.96827	0	1.97557	0.544618	-2.64341
LL0000002883	BX511034.2	ENSDARG00000071636.5	100151078	13.8379	12.7767	25.7213	2.95241	11.9078	17.7801	0.812311	-0.681273
LL0000020273	nfrkb	ENSDARG00000091512.4	567709	447.754	442.272	407.584	513.72	437.613	502.783	0.729003	0.164308
LL0000015016	LOC101884938		101884938	364.726	414.752	426.38	365.115	425.705	447.467	0.958076	0.0382524
LL0000020456	nol10	ENSDARG00000020077.9	393206	129.483	148.407	136.521	278.511	136.94	133.351	0.648478	0.405299
LL0000023883	rpe65b	ENSDARG00000094752.2	100002865	260.942	284.037	326.463	371.02	337.389	331.896	0.577051	0.255561
LL0000021512	pde7a	ENSDARG00000045305.9	100151215	683.986	665.373	803.297	1030.39	1039.95	1018.41	0.00643806	0.520926
LL0000020193	nek8	ENSDARG00000045626.8	171094	122.564	81.5745	83.0996	63.9689	114.117	112.607	0.990687	0.0171895
LL0000039536	znf1160	ENSDARG00000100196.2	568663	57.3283	50.1241	49.4641	49.2069	59.5392	81.9862	0.834541	0.281533
LL0000030590	tmem254	ENSDARG00000109902.1	393341	103.784	158.235	111.789	74.7944	139.917	130.388	0.936338	-0.115447
LL0000018107	LOC407643		407643	89.9461	179.857	97.9389	23.6193	35.7235	33.5847	0.000285876	-1.98476
LL0000032587	XLOC_003138			242.163	279.122	285.902	314.924	246.095	376.346	0.750243	0.215739
LL0000012630	ikbke	ENSDARG00000070606.5	437024	110.703	136.613	75.1854	166.319	172.664	126.436	0.431991	0.529121
LL0000000423	adrm1	ENSDARG00000058560.9	796450	831.26	710.583	589.612	885.724	745.233	511.673	0.993494	0.00755271
LL0000003042	BX539336.1	ENSDARG00000100606.2	100331456	3125.38	2807.93	3058.86	2566.63	2609.8	2710.48	0.384972	-0.189203
LL0000031364	tubg1	ENSDARG00000015610.10	393882	466.533	507.138	539.158	803.056	595.392	596.622	0.219391	0.399225
LL0000021459	pcsk6	ENSDARG00000104574.3	794305	104.772	275.191	271.063	223.399	258.996	292.384	0.831429	0.25103
LL0000022851	ptk2aa	ENSDARG00000100456.2	386705	1284.94	1302.24	1120.86	1074.68	907.973	1075.7	0.305766	-0.277894
LL0000013725	lmcd1	ENSDARG00000002002.11	394045	48.4325	67.815	90.0246	43.302	57.5546	38.5236	0.585222	-0.565599
LL0000008367	CU929199.1	ENSDARG00000100247.2	393098	0	0	2.96784	10.8255	6.94624	2.96335	0.492603	2.80586
LL0000021482	pdcd4b	ENSDARG00000041022.8	321061	224.371	120.888	211.706	138.763	139.917	179.777	0.764303	-0.280723
LL0000027407	si:dkey-261j4.4	ENSDARG00000035150.7	555524	0	0	8.90353	96.4455	62.5162	29.6335	0.00225737	4.40601
LL0000021220	pak1	ENSDARG00000103959.2	373103	84.0156	102.214	100.907	118.096	112.132	95.8151	0.862247	0.183318
LL0000008560	cyp27a7	ENSDARG00000033802.9	402831	8.89577	39.313	31.657	18.6986	20.8387	19.7557	0.863759	-0.429863
LL0000008018	CU469503.1	ENSDARG00000099348.2		28.6641	23.5878	67.2711	35.4289	21.831	29.6335	0.812722	-0.459722
LL0000030712	tnc	ENSDARG00000021948.11	30037	30926.6	39334.6	36627.2	28002.6	33445.2	27294.5	0.295408	-0.268413
LL0000005938	cntln	ENSDARG00000033345.9	799510	357.807	554.314	555.976	375.94	410.821	410.919	0.567727	-0.293733
LL0000024487	serhl	ENSDARG00000032340.8	322648	73.143	90.42	62.3247	80.6993	74.424	56.3037	0.948036	-0.0955066
LL0000020765	nup93	ENSDARG00000003487.10	30172	677.067	482.567	441.22	698.737	525.93	563.037	0.824905	0.159303
LL0000000940	amdhd2	ENSDARG00000100376.2	402981	188.788	103.197	97.9389	77.7468	33.7389	41.487	0.041719	-1.34969
LL0000008062	CU570881.2	ENSDARG00000112301.1		6.91893	1.96565	0.989281	0	1.98464	11.8534	0.946761	0.487009
LL0000020219	neurl1aa	ENSDARG00000069438.5	561943	127.506	171.994	140.478	56.0958	17.8618	50.377	0.00155576	-1.82294
LL0000001345	arl1	ENSDARG00000101680.2	436746	218.44	163.149	171.146	177.145	176.633	137.302	0.848773	-0.170604
LL0000031815	vax2	ENSDARG00000058702.5	373869	1.97684	10.8111	31.657	107.271	237.165	228.178	1.05601e-05	3.68768
LL0000007651	CT583727.1	ENSDARG00000095585.2		9.88418	5.89695	0	4.92069	0	11.8534	0.990401	0.0881276
LL0000021562	pdxdc1	ENSDARG00000101886.2	447813	141.344	252.586	159.274	210.605	218.31	157.058	0.947187	0.0829341
LL0000025782	si:ch211-241e1.5	ENSDARG00000008906.10	567583	56.3398	37.3474	74.1961	36.4131	31.7543	36.548	0.516007	-0.680824
LL0000011803	gspt1	ENSDARG00000031048.7	445485	199.661	187.72	173.124	261.781	244.111	177.801	0.6537	0.286627
LL0000014856	LOC101884154		101884154	0	0	0	8.85724	0	6.91449	1	4.8562
LL0000038931	zgc:171604		569282	18.7799	34.3989	6.92497	18.6986	45.6467	59.2671	0.534263	1.03996
LL0000024233	sb:cb81	ENSDARG00000040503.8	100334443	213.498	223.101	432.316	515.688	411.813	482.039	0.14038	0.697995
LL0000031497	ube2t	ENSDARG00000063285.7	768152	68.2009	38.3302	25.7213	73.8103	34.7312	58.2793	0.858215	0.335142
LL0000018358	lrrc29	ENSDARG00000076425.5	799466	93.8997	157.252	192.91	133.843	151.825	199.533	0.923809	0.127805
LL0000009499	eif3ea	ENSDARG00000090697.4	325102	1887.88	1201.01	1264.3	2238.91	1261.24	1511.31	0.783396	0.203179
LL0000025023	si:ch211-129p13.1	ENSDARG00000105447.2		0	0.982826	6.92497	4.92069	18.8541	9.87785	0.520488	2.08975
LL0000028596	slc25a22a	ENSDARG00000020718.10	571044	455.661	293.865	269.085	270.638	234.188	227.191	0.334869	-0.476617
LL0000012758	inka1a	ENSDARG00000070360.5	692272	415.136	260.449	369.002	223.399	267.927	292.384	0.401579	-0.414521
LL0000039291	zgc:92664	ENSDARG00000015161.9	436695	148.263	82.5574	90.0246	149.589	87.3242	54.3282	0.937716	-0.139545
LL0000000003	aaas	ENSDARG00000102274.2	378454	234.255	127.767	155.317	197.812	185.564	177.801	0.920349	0.117412
LL0000017435	LOC110438511		110438511	294.549	214.256	362.077	496.005	346.32	338.81	0.413809	0.439713
LL0000023716	ripply3	ENSDARG00000036974.7	654448	0.988418	3.9313	5.93569	4.92069	0.99232	13.829	0.864105	0.863006
LL0000030343	tjp1a	ENSDARG00000077506.8	378845	8928.38	7716.16	8260.5	7112.36	6463.98	5913.87	0.0483166	-0.353684
LL0000040320	LOC101883999		101883999	0	0.982826	0	41.3338	33.7389	18.7679	1.88259e-05	6.4672
LL0000021495	PDE3B	ENSDARG00000062190.7	563432	1291.86	1367.11	1504.7	1053.03	1138.19	1272.27	0.317722	-0.265635
LL0000010999	fut11	ENSDARG00000102402.2	568888	414.147	340.058	445.177	321.813	377.082	355.603	0.740111	-0.185726
LL0000013608	letm2	ENSDARG00000077515.6	100006201	399.321	488.464	440.23	473.37	449.521	465.247	0.923707	0.0638599
LL0000038251	yipf2	ENSDARG00000021399.10	445106	218.44	149.389	168.178	268.669	215.334	235.093	0.400957	0.424017
LL0000001277	arhgap25	ENSDARG00000061784.4	562468	3.95367	44.2272	17.8071	296.225	141.902	126.436	0.000195118	3.0965
LL0000031739	usp6nl	ENSDARG00000022187.10	561983	885.623	843.264	615.333	484.196	489.214	455.369	0.00369863	-0.714343
LL0000001909	bin2a	ENSDARG00000003219.8	492780	23.722	15.7252	6.92497	0.984137	25.8003	9.87785	0.937678	-0.339355
LL0000010757	FP236157.4	ENSDARG00000117258.1		54.363	74.6947	26.7106	0	17.8618	21.7313	0.246556	-1.9764
LL0000012142	hivep1	ENSDARG00000103658.2	100000517	723.522	769.552	765.704	985.121	841.488	797.142	0.523963	0.216105
LL0000005558	chata	ENSDARG00000015854.11	100170938	0.988418	6.87978	17.8071	7.8731	13.8925	15.8046	0.89352	0.549253
LL0000004786	cadm1a	ENSDARG00000031075.9	569931	11.861	114.008	111.789	39.3655	54.5776	66.1816	0.783424	-0.569751
LL0000028004	si:dkey-88n24.5	ENSDARG00000113320.1	572610	0	11.7939	14.8392	0	10.9155	1.97557	0.867505	-1.04737
LL0000034982	XLOC_021531			18.7799	0	7.91425	10.8255	2.97696	1.97557	0.89256	-0.758104
LL0000031665	uqcrc2a	ENSDARG00000014794.10	436930	307.398	217.204	264.138	339.527	296.704	314.116	0.612912	0.268977
LL0000026084	si:ch211-59d17.3	ENSDARG00000055999.7	100003763	8.89577	25.5535	34.6249	15.7462	29.7696	17.7801	0.966398	-0.1262
LL0000038670	zgc:136472	ENSDARG00000058445.6	678514	3.95367	22.605	22.7535	14.7621	33.7389	10.8656	0.939312	0.267444
LL0000013443	kpna4	ENSDARG00000023190.10	327373	721.545	727.291	763.725	798.135	731.34	724.046	0.962412	0.0264841
LL0000019452	mon2	ENSDARG00000099798.3	100334806	1165.35	1166.61	933.882	1193.76	1071.71	1246.58	0.837827	0.104856
LL0000002311	BX005445.1	ENSDARG00000095064.3		35.5831	74.6947	35.6141	23.6193	43.6621	97.7907	0.944105	0.178048
LL0000014474	LOC101882124		101882124	95.8766	86.4887	25.7213	38.3814	40.6851	56.3037	0.665423	-0.620337
LL0000012100	hibch	ENSDARG00000054867.6	798364	210.533	146.441	147.403	190.923	157.779	189.655	0.930105	0.0941297
LL0000009138	dohh	ENSDARG00000003564.5	321732	101.807	56.0211	75.1854	126.954	88.3165	104.705	0.607457	0.457708
LL0000018919	mex3c		100330946	9.88418	397.062	184.006	188.954	224.264	200.52	0.990401	0.054573
LL0000000367	adgrl1a	ENSDARG00000089292.4	562531	286.641	217.204	210.717	79.7151	115.109	191.63	0.108001	-0.886789
LL0000001776	bag6	ENSDARG00000075892.3	83910	1195	1141.06	1019.95	1193.76	1000.26	966.054	0.873272	-0.0867746
LL0000023842	rnpep	ENSDARG00000012506.10	437014	79.0735	114.991	67.2711	80.6993	85.3396	56.3037	0.863503	-0.233238
LL0000029515	stard7	ENSDARG00000074858.5	564572	168.031	126.785	224.567	293.273	200.449	294.36	0.255611	0.601663
LL0000021108	ostc	ENSDARG00000104901.2	393239	177.915	180.84	124.649	242.098	196.479	161.009	0.681408	0.310727
LL0000015591	LOC103909257		103909257	1.97684	14.7424	13.8499	7.8731	0.99232	16.7923	0.958383	-0.252586
LL0000009869	exoc3l2a	ENSDARG00000008414.9	553301	2865.42	2059.02	1842.04	287.368	317.543	282.507	6.37203e-41	-2.93074
LL0000007532	CT027772.2	ENSDARG00000093819.3	110437993	1.97684	15.7252	13.8499	7.8731	17.8618	28.6458	0.790461	0.785124
LL0000002411	BX248128.1	ENSDARG00000105019.3	100534845	0	7.8626	9.89281	9.84137	0	6.91449	0.990401	-0.0833567
LL0000012472	ids	ENSDARG00000071699.4	559959	67.2125	94.3513	57.3783	47.2386	67.4778	74.0839	0.886058	-0.213864
LL0000008744	dcun1d3	ENSDARG00000011493.11	557682	193.73	153.321	113.767	246.034	168.694	198.545	0.545178	0.412379
LL0000022398	ppm1f	ENSDARG00000005786.7	553757	614.796	550.382	533.223	411.369	547.761	406.967	0.417622	-0.314162
LL0000030187	tex264a	ENSDARG00000092154.3	402960	271.815	222.119	190.931	201.748	157.779	148.168	0.416476	-0.431802
LL0000031115	trim46b	ENSDARG00000058649.7	100034631	19.7684	14.7424	5.93569	4.92069	5.95392	6.91449	0.611454	-1.18515
LL0000012394	hspbp1	ENSDARG00000102937.2	338155	53.3746	69.7806	63.314	87.5882	89.3088	76.0594	0.596233	0.439887
LL0000019833	myha	ENSDARG00000095930.3	100149148	92.9113	90.42	60.3462	28.54	76.4087	89.8884	0.843778	-0.32285
LL0000025167	si:ch211-153a8.4	ENSDARG00000109646.1	555850	389.437	456.031	425.391	430.068	417.767	447.467	0.967687	0.0274684
LL0000023268	rbl1	ENSDARG00000008141.9	795522	964.696	745.965	777.575	928.041	963.543	907.774	0.68732	0.169984
LL0000006872	CR762436.1	ENSDARG00000112375.1		2246.68	1840.83	1975.6	2543.99	1580.77	1332.52	0.843121	-0.151856
LL0000017279	LOC110438274		110438274	0.988418	14.7424	117.724	36.4131	178.618	86.9251	0.804144	1.178
LL0000038981	zgc:172145	ENSDARG00000045586.4	559095	0	5.89695	5.93569	7.8731	1.98464	19.7557	0.755243	1.3234
LL0000002776	BX469925.1	ENSDARG00000087592.4	101883591	110.703	151.355	112.778	85.6199	127.017	148.168	0.967159	-0.055165
LL0000013771	LO017722.1	ENSDARG00000113296.1		81.0503	80.5917	89.0353	97.4296	105.186	142.241	0.517018	0.460175
LL0000021641	pfkpa	ENSDARG00000028000.11	560944	412.17	443.254	381.863	486.164	370.136	300.287	0.912865	-0.0972857
LL0000004639	CABZ01092156.1	ENSDARG00000101913.2	406448	0	18.6737	3.95713	9.84137	9.9232	5.92671	0.973826	0.182589
LL0000011126	galnt9	ENSDARG00000006832.11	797549	0	1.96565	20.7749	3.93655	1.98464	13.829	0.974874	-0.20314
LL0000011709	grhl3	ENSDARG00000078552.6	794613	85.004	133.664	74.1961	51.1751	60.5315	62.2305	0.288529	-0.751816
LL0000030007	tbc1d23	ENSDARG00000044357.7	798995	651.368	627.043	721.186	674.134	672.793	651.938	0.999826	-0.000509496
LL0000024950	si:ch211-114c12.5	ENSDARG00000092931.2	565476	0.988418	0.982826	10.8821	0.984137	1.98464	2.96335	1	-1.1154
LL0000003103	BX548061.1	ENSDARG00000092247.2		0	16.708	8.90353	7.8731	3.96928	0	0.853022	-1.11278
LL0000002724	BX324206.2	ENSDARG00000097663.2		35.5831	57.9867	38.582	44.2862	27.785	70.1327	0.959356	0.105748
LL0000021354	pccb	ENSDARG00000038910.8	405861	195.707	242.758	258.202	269.654	321.512	266.702	0.55859	0.300241
LL0000018992	mhc1zca	ENSDARG00000069471.6	556341	21.7452	18.6737	5.93569	5.90482	6.94624	9.87785	0.663601	-1.02831
LL0000012237	HOOK3	ENSDARG00000114329.1	100536916	619.738	682.081	481.78	575.72	550.738	494.88	0.824363	-0.137631
LL0000011286	ggact.2	ENSDARG00000038248.5	447805	81.0503	103.197	59.3569	110.223	73.4317	68.1572	0.975797	0.0478073
LL0000026268	si:ch73-174h16.4	ENSDARG00000036493.8	569854	60.2935	98.2826	71.2283	49.2069	76.4087	80.0106	0.919118	-0.16056
LL0000024096	rufy3	ENSDARG00000029692.7	541522	264.896	264.38	258.202	185.018	155.794	183.728	0.0681514	-0.586135
LL0000015758	LOC103909982		103909982	9.88418	23.5878	31.657	13.7779	28.7773	8.89006	0.912609	-0.340492
LL0000009459	egr3	ENSDARG00000089156.3	436920	28.6641	73.7119	42.5391	237.177	137.933	84.9495	0.013946	1.66649
LL0000019038	miga2	ENSDARG00000089357.3	541431	299.491	325.315	281.945	305.083	278.842	311.152	0.981229	-0.0187011
LL0000011686	gramd4a	ENSDARG00000069171.7	558571	7.90735	6.87978	8.90353	7.8731	1.98464	15.8046	0.979431	0.1156
LL0000028939	smad9	ENSDARG00000021938.11	445564	98.8418	91.4028	118.714	284.416	256.019	313.128	2.51659e-07	1.46618
LL0000030363	tll1	ENSDARG00000037429.5	474335	5272.22	3973.56	4522.99	1810.81	1730.61	1299.93	3.7565e-15	-1.50792
LL0000029230	SPAG9	ENSDARG00000078142.4	100333761	1096.16	1183.32	1172.3	689.88	855.38	696.388	0.00109659	-0.622817
LL0000013210	kctd12.1	ENSDARG00000069843.5	373865	14.8263	4.91413	0.989281	2.95241	11.9078	17.7801	0.883507	0.654888
LL0000009366	ecrg4b	ENSDARG00000088717.4	793804	22.7336	121.87	134.542	23.6193	46.6391	54.3282	0.337993	-1.16398
LL0000002486	BX284696.1	ENSDARG00000099710.2		60.2935	93.3684	53.4212	80.6993	126.025	93.8396	0.542949	0.537245
LL0000010462	FO681288.1	ENSDARG00000054584.6	100002134	8.89577	10.8111	7.91425	10.8255	16.8694	6.91449	0.924601	0.325127
LL0000017707	LOC110439505		110439505	4.94209	8.84543	8.90353	0	9.9232	9.87785	0.970396	-0.196908
LL0000004717	CABZ01115113.1	ENSDARG00000110608.1	100333944	17.7915	15.7252	21.7642	21.651	9.9232	9.87785	0.87514	-0.414992
LL0000011978	hcn1	ENSDARG00000104480.2	100334297	11.861	12.7767	26.7106	0	3.96928	14.8168	0.63304	-1.45073
LL0000003777	BX936420.1	ENSDARG00000097966.2		0	14.7424	0	21.651	0.99232	0	0.946626	0.618994
LL0000013051	kalrna	ENSDARG00000104119.3	100148988	937.021	1012.31	1014.01	922.137	1054.84	927.53	0.957577	-0.0289591
LL0000021703	phf21aa	ENSDARG00000006878.14	497383	981.499	1051.62	1046.66	684.96	1030.03	747.753	0.376029	-0.322605
LL0000013624	lgals9l3	ENSDARG00000041060.6	327284	104.772	75.6776	86.0675	123.017	129.994	98.7785	0.596051	0.400523
LL0000023156	ralgapa2	ENSDARG00000005861.12	568210	5625.09	5829.14	5413.35	1791.13	2012.43	1812.59	1.96369e-39	-1.58662
LL0000009326	dzank1	ENSDARG00000055787.6	407652	0	0	5.93569	9.84137	0.99232	7.90228	0.781547	1.65909
LL0000006149	cplx4c	ENSDARG00000094889.5	100004361	0	0	8.90353	0	11.9078	1.97557	0.947398	0.640921
LL0000012549	igflr1	ENSDARG00000091650.3	793825	42.502	42.2615	18.7963	18.6986	35.7235	37.5358	0.944228	-0.171633
LL0000016439	LOC108180725		108180725	7.90735	0.982826	0	64.9531	20.8387	19.7557	0.0305232	3.57006
LL0000031172	trnt1	ENSDARG00000075297.2	415249	86.9808	66.8321	74.1961	154.51	96.2551	122.485	0.222162	0.71119
LL0000005828	clptm1l	ENSDARG00000021048.7	436653	280.711	200.496	205.771	303.114	242.126	197.557	0.913191	0.112764
LL0000020660	nsmfb	ENSDARG00000101234.2	569891	59.3051	71.7463	70.239	23.6193	30.7619	23.7068	0.0256136	-1.36626
LL0000040125	rasgrp2	ENSDARG00000062328.8	557063	9.88418	6.87978	17.8071	430.068	246.095	182.74	1.35903e-17	4.63545
LL0000005830	clpxb	ENSDARG00000067796.6	100332309	298.502	276.174	263.149	352.321	271.896	270.653	0.909293	0.0950807
LL0000001716	b3galt4	ENSDARG00000076218.4	101886595	12.8494	26.5363	32.6463	11.8096	29.7696	26.6702	0.977764	-0.0780224
LL0000016973	LOC110437713		110437713	21.7452	22.605	30.6677	8.85724	8.93088	31.6091	0.797565	-0.602743
LL0000021671	pgpep1l	ENSDARG00000041092.8	558733	0	18.6737	22.7535	26.5717	35.7235	19.7557	0.740229	0.98585
LL0000017693	LOC110439484			10.8726	45.21	26.7106	30.5083	9.9232	32.5969	0.953367	-0.181035
LL0000016320	LOC108179239			5.93051	0	0	14.7621	20.8387	14.8168	0.208488	3.08836
LL0000018552	malt2	ENSDARG00000006052.11	259196	47.4441	33.4161	35.6141	78.731	65.4931	47.4137	0.42371	0.71847
LL0000011735	GRIN2B	ENSDARG00000079348.4	110438919	28.6641	14.7424	23.7428	3.93655	0	23.7068	0.684754	-1.28027
LL0000013930	LOC100004160		100004160	61.2819	53.0726	112.778	61.0165	98.2397	95.8151	0.921163	0.167391
LL0000031359	tubb4b	ENSDARG00000002344.9	336681	9037.11	6245.86	7710.46	7741.22	6035.29	6409.74	0.664669	-0.187841
LL0000001847	bcl3	ENSDARG00000087832.3	565656	57.3283	80.5917	117.724	7.8731	6.94624	23.7068	0.000421214	-2.73013
LL0000018305	lratb.2	ENSDARG00000077652.4	556575	0	1.96565	9.89281	6.88896	7.93856	5.92671	0.880604	0.807759
LL0000001042	ankrd40	ENSDARG00000076490.4	100005118	224.371	221.136	169.167	205.685	162.741	162.985	0.784204	-0.209972
LL0000024682	shisal1a	ENSDARG00000045594.7	560435	28.6641	4.91413	8.90353	1.96827	7.93856	21.7313	0.921814	-0.425144
LL0000005747	clcn4	ENSDARG00000035808.6	768175	38.5483	47.1756	64.3033	19.6827	39.6928	33.5847	0.559615	-0.690709
LL0000024488	serinc1	ENSDARG00000009106.11	325690	299.491	378.388	429.348	312.956	444.56	415.857	0.926412	0.0836685
LL0000016765	LOC108184009		108184009	6.91893	3.9313	0	0	2.97696	13.829	0.93358	0.631132
LL0000011021	fzd2	ENSDARG00000054438.5	30370	2659.83	2387.28	2372.3	2134.59	2343.86	1889.63	0.418204	-0.22045
LL0000012891	irx7	ENSDARG00000002601.8	140746	63.2588	135.63	213.685	131.874	173.656	226.203	0.778301	0.366049
LL0000006044	commd4	ENSDARG00000061946.7	767771	16.8031	7.8626	27.6999	35.4289	8.93088	7.90228	0.999826	-0.00240855
LL0000009294	dusp8b		100330259	84.0156	29.4848	240.395	28.54	135.948	57.2915	0.739232	-0.674246
LL0000014867	LOC101884182		101884182	4.94209	1.96565	4.94641	0	10.9155	0	0.98859	-0.119451
LL0000014955	LOC101884641		101884641	6.91893	26.5363	48.4748	32.4765	36.7159	28.6458	0.9277	0.256021
LL0000027246	si:dkey-237j10.2	ENSDARG00000094025.3	568721	25.6989	10.8111	17.8071	91.5248	96.2551	74.0839	0.00012489	2.26964
LL0000011510	golim4b	ENSDARG00000014545.5	541535	193.73	175.926	197.856	120.065	186.556	179.777	0.787843	-0.222581
LL0000039982	LOC108179070	ENSDARG00000100044.2	108179070	164.077	145.458	133.553	99.3979	182.587	279.543	0.757579	0.341724
LL0000019951	nacad	ENSDARG00000012347.9	100534969	30.641	122.853	87.0568	15.7462	75.4164	113.595	0.931827	-0.232539
LL0000018805	mdka	ENSDARG00000036036.8	30277	3419.93	4232.05	4298.43	3175.81	3748.99	3867.18	0.711414	-0.147108
LL0000020252	nfe2l2b	ENSDARG00000089697.4	100873093	11.861	22.605	8.90353	37.3972	22.8234	13.829	0.705687	0.771648
LL0000028652	slc27a6	ENSDARG00000046053.7	568835	189.776	188.703	153.339	136.795	146.863	169.899	0.758069	-0.229687
LL0000029122	snx5	ENSDARG00000020442.6	406797	909.345	630.974	463.973	516.672	290.75	239.044	0.0489442	-0.937523
LL0000027708	si:dkey-4c15.8	ENSDARG00000098609.2		31.6294	28.5019	32.6463	31.4924	56.5623	35.5603	0.787905	0.413884
LL0000029622	stx5a	ENSDARG00000025033.6	436605	542.642	385.268	484.748	420.227	478.298	408.943	0.874895	-0.111621
LL0000039508	znf1130	ENSDARG00000105144.2		70.1777	76.6604	148.392	110.223	139.917	101.742	0.846563	0.253285
LL0000012109	hif1al2	ENSDARG00000044550.8	497283	0	0	10.8821	7.8731	5.95392	4.93892	0.911752	0.786592
LL0000006857	CR759927.2	ENSDARG00000097883.2		8.89577	35.3817	45.5069	47.2386	41.6775	32.5969	0.842069	0.436563
LL0000005506	cfap36	ENSDARG00000037079.7	678564	114.657	155.286	190.931	127.938	146.863	179.777	0.98859	-0.0198576
LL0000035598	XLOC_026848			27.6757	41.2787	62.3247	66.9213	63.5085	40.4992	0.805412	0.380807
LL0000005493	cetn2	ENSDARG00000101510.2	100006257	1.97684	7.8626	6.92497	16.7303	6.94624	2.96335	0.873806	0.668251
LL0000028901	slco3a1	ENSDARG00000018726.10	569735	98.8418	78.626	117.724	218.478	152.817	151.131	0.0826642	0.823718
LL0000019802	mybpc3	ENSDARG00000011615.13	556489	60.2935	69.7806	76.1747	7.8731	53.5853	80.0106	0.790461	-0.544009
LL0000029712	svilb	ENSDARG00000014651.11		26.6873	6.87978	2.96784	1.96827	0	0	0.14538	-4.2113
LL0000008460	cx30.3	ENSDARG00000042707.7	404725	153.205	171.994	46.4962	82.6675	85.3396	93.8396	0.687656	-0.505466
LL0000000593	AL772373.1	ENSDARG00000117427.1		46.4557	66.8321	44.5177	48.2227	44.6544	35.5603	0.840036	-0.297167
LL0000024245	sc:d156	ENSDARG00000076539.5	100142634	0	0	0	10.8255	9.9232	10.8656	0.0247889	5.85934
LL0000013448	kpnb3	ENSDARG00000040245.9	569455	2007.48	1385.78	1435.45	2730	1938	2095.09	0.117279	0.486063
LL0000039873	LOC100330186	ENSDARG00000057921.7	100330186	668.171	640.802	569.826	299.178	372.12	240.032	4.14486e-05	-1.04382
LL0000023825	rnf4	ENSDARG00000090993.3	557319	82.0387	60.9352	53.4212	77.7468	56.5623	82.9739	0.923572	0.145907
LL0000028415	sim1a	ENSDARG00000023316.8	260351	42.502	91.4028	55.3998	8.85724	25.8003	38.5236	0.198416	-1.37141
LL0000024485	serf2	ENSDARG00000074340.6	100333424	347.923	299.762	223.578	459.592	264.95	208.423	0.939104	0.0987547
LL0000001686	auh	ENSDARG00000042975.4	445182	44.4788	47.1756	27.6999	77.7468	43.6621	46.4259	0.710835	0.491825
LL0000018038	LOC110440112		110440112	6.91893	12.7767	0.989281	32.4765	22.8234	3.95114	0.555868	1.5179
LL0000007062	CR848741.1	ENSDARG00000092615.2		3.95367	0	9.89281	7.8731	5.95392	10.8656	0.862247	0.83509
LL0000015163	LOC101885668		101885668	85.9924	71.7463	33.6356	72.8262	40.6851	20.7435	0.769163	-0.511342
LL0000019576	mrps11	ENSDARG00000075129.6	556272	42.502	27.5191	34.6249	96.4455	60.5315	32.5969	0.432782	0.857398
LL0000011903	h2afx1	ENSDARG00000068995.5	449794	495.198	306.642	292.827	415.306	299.681	223.239	0.819792	-0.222438
LL0000020187	nek12	ENSDARG00000037174.5	548344	83.0271	77.6432	55.3998	95.4613	54.5776	90.8762	0.920349	0.157101
LL0000030106	tdg.1	ENSDARG00000013004.13	553789	986.442	874.715	845.836	1078.61	989.343	791.216	0.904166	0.0789179
LL0000001925	bloc1s1	ENSDARG00000014171.8	556597	2.96526	6.87978	8.90353	15.7462	11.9078	0.987785	0.89278	0.61139
LL0000037949	XLOC_043454			30.641	60.9352	17.8071	32.4765	58.5469	79.0228	0.692722	0.636276
LL0000019918	myrfl	ENSDARG00000101645.2	100329855	708.696	543.503	845.836	414.322	335.404	375.358	0.000745777	-0.898943
LL0000014660	LOC101883073		101883073	3.95367	7.8626	7.91425	6.88896	0	10.8656	0.978712	-0.151993
LL0000013099	kcnab1a	ENSDARG00000008140.12	541540	29.6526	21.6222	30.6677	15.7462	37.7082	19.7557	0.947626	-0.162747
LL0000021662	pglyrp5	ENSDARG00000068382.5	553387	3.95367	5.89695	5.93569	7.8731	0	28.6458	0.772533	1.21003
LL0000009901	ezh2	ENSDARG00000010571.13	768133	1177.21	851.127	782.522	1198.68	985.374	957.164	0.789335	0.160334
LL0000025275	si:ch211-166i24.1	ENSDARG00000090676.5		0	10.8111	24.732	5.90482	5.95392	1.97557	0.738697	-1.36129
LL0000039561	znf142	ENSDARG00000061373.7	561536	341.004	253.569	296.784	241.114	284.796	308.189	0.912456	-0.0957783
LL0000018470	lygl1	ENSDARG00000056874.5	436979	1.97684	10.8111	4.94641	87.5882	34.7312	31.6091	0.00318161	3.11702
LL0000008194	CU693502.1	ENSDARG00000097467.2		62.2704	74.6947	68.2604	117.112	65.4931	99.7663	0.609216	0.460467
LL0000007491	CT025742.1	ENSDARG00000074889.6	558403	40.5252	75.6776	76.1747	93.493	105.186	96.8029	0.425521	0.619051
LL0000039762	bicd2	ENSDARG00000075571.4	557383	1117.9	1145.97	1051.61	862.104	802.787	814.923	0.0198816	-0.418982
LL0000008293	CU896691.3	ENSDARG00000109630.1		51.3978	78.626	33.6356	58.0641	73.4317	57.2915	0.906934	0.205855
LL0000024967	si:ch211-117i20.2	ENSDARG00000102157.2		0	0	0	5.90482	8.93088	2.96335	1	5.03047
LL0000026682	si:dkey-119m7.8	ENSDARG00000096654.2		90.9345	153.321	93.9817	45.2703	105.186	61.2427	0.452572	-0.676259
LL0000021327	pax7a	ENSDARG00000100398.3	30587	476.418	561.193	279.967	681.023	995.297	686.511	0.0294641	0.842573
LL0000013453	kri1	ENSDARG00000075380.5	402800	110.703	153.321	145.424	198.796	128.009	180.765	0.700797	0.309969
LL0000010088	fam50a	ENSDARG00000024895.9	550329	70.1777	89.4371	66.2819	90.5406	82.3626	90.8762	0.840756	0.223607
LL0000012635	ikzf5	ENSDARG00000056491.7	402893	93.8997	55.0382	64.3033	125.97	66.4855	70.1327	0.828107	0.300485
LL0000008699	dcaf11	ENSDARG00000009868.9	567578	197.684	221.136	233.47	221.431	231.211	161.009	0.927652	-0.0881122
LL0000019522	mrm1	ENSDARG00000059658.6	563095	2.96526	10.8111	2.96784	21.651	30.7619	18.7679	0.146845	2.08699
LL0000029445	sstr5	ENSDARG00000101655.2	406588	0	2.94848	8.90353	1.96827	3.96928	18.7679	0.837808	1.05985
LL0000011447	gnal	ENSDARG00000045415.8	492467	227.336	275.191	291.838	255.876	238.157	218.3	0.824363	-0.157242
LL0000015177	LOC101885715			548.572	367.577	291.838	52.1593	163.733	0	0.539779	-2.48422
LL0000019706	mthfsd	ENSDARG00000062042.9	566203	2.96526	7.8626	2.96784	12.7938	16.8694	38.5236	0.124777	2.30464
LL0000010308	fgf8a	ENSDARG00000003399.7	30538	10.8726	22.605	16.8178	68.8896	37.7082	20.7435	0.266926	1.34014
LL0000024210	sart1	ENSDARG00000005945.7	436946	520.897	454.065	490.684	603.276	598.369	493.892	0.616918	0.210224
LL0000011391	glra4b	ENSDARG00000058103.6	192125	2.96526	4.91413	29.6784	10.8255	17.8618	17.7801	0.939572	0.307262
LL0000028009	si:dkey-88p24.11	ENSDARG00000092787.3	558861	8.89577	12.7767	4.94641	19.6827	4.9616	0.987785	0.990778	-0.054291
LL0000000914	alox5a	ENSDARG00000057273.6	567204	232.278	140.544	168.178	967.407	635.085	490.929	1.20999e-08	1.95223
LL0000012229	homer1b	ENSDARG00000101759.2	436769	30.641	25.5535	6.92497	0.984137	4.9616	19.7557	0.636805	-1.29636
LL0000018400	lrrc8db	ENSDARG00000103840.2	563923	140.355	182.806	170.156	161.399	158.771	179.777	0.985296	0.019227
LL0000031499	ube2v2	ENSDARG00000028198.7	406836	557.468	417.701	399.67	616.07	487.229	405.98	0.867505	0.134632
LL0000013588	ldlrap1a	ENSDARG00000004311.7	368278	73.143	95.3341	38.582	39.3655	55.5699	49.3892	0.673286	-0.520913
LL0000005842	clu	ENSDARG00000010434.13	393775	31.6294	35.3817	33.6356	29.5241	29.7696	26.6702	0.905261	-0.227526
LL0000027625	si:dkey-38n4.2	ENSDARG00000093333.2	101882422	4.94209	486.499	420.445	305.083	347.312	10.8656	0.945214	-0.459268
LL0000013267	khdrbs1a	ENSDARG00000052856.7	30082	9362.3	7544.17	9101.39	11703.4	8714.56	9494.59	0.568085	0.201807
LL0000029921	taf1b	ENSDARG00000028937.11	449647	76.1082	132.681	137.51	147.621	159.764	193.606	0.417622	0.532717
LL0000019096	mir132-2	ENSDARG00000090368.2	100033651	0	11.7939	0	5.90482	4.9616	4.93892	0.955431	0.421828
LL0000023904	rpl18	ENSDARG00000029533.8	445038	1491.52	833.436	951.689	1787.19	1142.16	1242.63	0.538574	0.34854
LL0000020733	nudt6	ENSDARG00000103523.3	100037370	17.7915	12.7767	5.93569	31.4924	3.96928	24.6946	0.805571	0.72084
LL0000024937	si:ch211-113d11.6	ENSDARG00000105351.2	108192189	4.94209	10.8111	0.989281	0	0	0	1	-4.9406
LL0000008511	cxxc5b	ENSDARG00000075735.5	560916	534.734	543.503	527.287	496.989	426.698	507.721	0.710019	-0.165581
LL0000018472	lyl1		100333113	34.5946	46.1928	41.5498	60.0324	105.186	36.548	0.527753	0.721666
LL0000038066	XLOC_043787		101884132	0	116.956	77.164	0	56.5623	59.2671	0.944228	-0.744945
LL0000009783	erich1		100002532	19.7684	23.5878	0.989281	0	18.8541	40.4992	0.937805	0.420384
LL0000004691	CABZ01111953.1	ENSDARG00000099747.2	100334085	31.6294	7.8626	5.93569	7.8731	11.9078	9.87785	0.849675	-0.615122
LL0000001589	atp1b3b	ENSDARG00000042837.3	64272	167.043	190.668	117.724	95.4613	152.817	169.899	0.878574	-0.185248
LL0000031386	twf2a	ENSDARG00000094792.5	100310784	17.7915	29.4848	13.8499	13.7779	20.8387	16.7923	0.926136	-0.250094
LL0000022174	pltp	ENSDARG00000104495.3	445125	46.4557	27.5191	27.6999	45.2703	37.7082	39.5114	0.881954	0.26882
LL0000000448	aftphb	ENSDARG00000071347.5	100004990	74.1314	23.5878	59.3569	41.3338	35.7235	48.4015	0.863639	-0.324079
LL0000008372	CU929230.1	ENSDARG00000030665.9	797473	408.217	628.026	567.848	577.689	577.53	597.61	0.852845	0.127903
LL0000009479	eif1b	ENSDARG00000012688.10	322237	581.19	878.646	718.218	733.182	730.348	730.961	0.988928	0.0108167
LL0000018803	mdh1b	ENSDARG00000018008.12	767794	0	16.708	0.989281	5.90482	0	2.96335	0.89819	-0.996688
LL0000009806	espnla	ENSDARG00000078211.5	100536888	0.988418	2.94848	12.8607	3.93655	4.9616	7.90228	0.999826	0.000459103
LL0000021232	palm1a	ENSDARG00000026882.11	550557	577.236	433.426	512.448	378.893	281.819	277.568	0.0190717	-0.698854
LL0000020321	nipbla	ENSDARG00000098272.2	570900	4123.68	4249.74	4762.4	3890.29	4682.76	5167.1	0.906901	0.0648897
LL0000031450	ubald2	ENSDARG00000115335.1	553806	432.927	389.199	464.962	435.973	454.483	422.772	0.967031	0.0290269
LL0000009281	dusp23a	ENSDARG00000009844.8	323834	61.2819	35.3817	48.4748	15.7462	39.6928	15.8046	0.375979	-1.02686
LL0000030490	tmem150c	ENSDARG00000069590.6	100003020	22.7336	17.6909	22.7535	7.8731	27.785	23.7068	0.974913	-0.0900088
LL0000030605	tmem30ab	ENSDARG00000043555.7	333952	334.085	367.577	333.388	404.48	477.306	346.713	0.61007	0.247146
LL0000001563	atoh7	ENSDARG00000069552.5	58216	4.94209	2.94848	0	15.7462	30.7619	3.95114	0.255136	2.6766
LL0000011764	grm4	ENSDARG00000040156.7	567181	28.6641	16.708	53.4212	8.85724	57.5546	42.4748	0.963365	0.140284
LL0000037821	XLOC_043091			3.95367	10.8111	5.93569	14.7621	25.8003	3.95114	0.68632	1.10415
LL0000019773	mvp	ENSDARG00000021242.12	373081	382.518	472.739	240.395	276.543	255.026	168.911	0.22528	-0.645403
LL0000009364	ecpas	ENSDARG00000061952.7	563777	1276.05	1202.98	1039.73	1246.9	1195.75	891.97	0.91138	-0.0775485
LL0000013349	klc1b		335499	103.784	141.527	176.092	125.97	133.963	103.717	0.838805	-0.212658
LL0000011849	gtf3c6	ENSDARG00000043301.7	393232	6.91893	12.7767	8.90353	23.6193	14.8848	4.93892	0.844961	0.603116
LL0000008649	daam2	ENSDARG00000028393.11	798465	111.691	204.428	152.349	62.9848	93.2781	107.669	0.164277	-0.827917
LL0000001463	asb4	ENSDARG00000034988.7	550321	21.7452	10.8111	21.7642	9.84137	16.8694	20.7435	0.947473	-0.19492
LL0000038733	zgc:153441	ENSDARG00000054797.6	751745	0	2.94848	0.989281	17.7145	33.7389	3.95114	0.0689274	3.81292
LL0000022957	pwp2h	ENSDARG00000037109.8	266990	247.105	249.638	211.706	577.689	466.391	371.407	0.000433308	0.998566
LL0000006138	cpeb3	ENSDARG00000060103.7	100005268	144.309	148.407	152.349	92.5089	156.787	143.229	0.863639	-0.18134
LL0000029181	sox12	ENSDARG00000025847.8	562381	76.1082	89.4371	108.821	101.366	67.4778	126.436	0.944228	0.106072
LL0000004903	card14	ENSDARG00000103485.2	568689	22.7336	49.1413	24.732	0	37.7082	29.6335	0.895285	-0.520858
LL0000038440	zgc:100906	ENSDARG00000033599.7	445123	6.91893	14.7424	15.8285	15.7462	14.8848	36.548	0.683242	0.841471
LL0000008980	dlg5a	ENSDARG00000074059.6	569065	1982.77	2311.61	2391.09	2008.62	2249.59	2323.27	0.967159	-0.0226242
LL0000022996	qrfpr4	ENSDARG00000092652.3	100331807	34.5946	46.1928	45.5069	9.84137	36.7159	33.5847	0.690757	-0.656431
LL0000019024	mid1ip1l	ENSDARG00000018145.5	322977	22.7336	35.3817	32.6463	66.9213	94.2704	54.3282	0.0724463	1.24751
LL0000000902	alkal2b	ENSDARG00000042815.6	100329254	0	0	0	7.8731	0	0	1	3.85391
LL0000002098	BX000363.1	ENSDARG00000088631.3	100535969	5.93051	0	0	9.84137	27.785	10.8656	0.260442	3.03206
LL0000019928	n4bp2	ENSDARG00000061451.6	558048	709.684	657.51	836.932	671.182	712.486	866.287	0.967159	0.0297045
LL0000001199	apool	ENSDARG00000039374.7	541537	231.29	248.655	315.581	334.607	333.42	317.079	0.506084	0.308398
LL0000013867	LO018550.2	ENSDARG00000111583.1	103911283	7.90735	5.89695	10.8821	2.95241	0	2.96335	0.516424	-2.06006
LL0000001253	arfrp1	ENSDARG00000057857.8	503602	126.518	86.4887	62.3247	162.383	65.4931	102.73	0.863997	0.264055
LL0000000057	abcc9	ENSDARG00000015985.11	561160	444.788	453.083	743.94	43.302	125.032	201.508	7.44486e-05	-2.15036
LL0000035779	XLOC_028370			91.9229	70.7634	51.4426	74.7944	78.3933	56.3037	0.984494	-0.0316166
LL0000005826	clpp	ENSDARG00000020679.12	553713	217.452	125.802	133.553	277.527	181.595	161.997	0.655023	0.381551
LL0000021535	pdia6	ENSDARG00000009001.9	322160	1017.08	1197.08	1106.02	1198.68	1433.9	970.005	0.843778	0.117748
LL0000034044	XLOC_014770			0	5.89695	7.91425	15.7462	5.95392	4.93892	0.834074	0.94781
LL0000023227	rasgrp3	ENSDARG00000077864.6	563441	548.572	534.657	496.619	516.672	639.054	536.367	0.867505	0.0989806
LL0000021710	phf5a	ENSDARG00000045155.7	286774	50.4093	26.5363	10.8821	66.9213	20.8387	29.6335	0.870063	0.418758
LL0000023790	rnf170	ENSDARG00000104069.2	406612	138.379	266.346	162.242	185.018	213.349	167.923	0.999826	-0.00183019
LL0000037909	XLOC_043347			1.97684	3.9313	0	11.8096	0	1.97557	1	1.22222
LL0000023230	rasl10a	ENSDARG00000062314.3	100004647	12.8494	56.0211	32.6463	5.90482	9.9232	13.829	0.181747	-1.77554
LL0000002422	BX248331.2	ENSDARG00000102650.2		7.90735	2.94848	3.95713	0	6.94624	8.89006	0.98859	0.096221
LL0000040076	nadsyn1	ENSDARG00000117533.1	798974	77.0966	72.7291	60.3462	73.8103	80.378	75.0717	0.925661	0.125362
LL0000000513	aig1	ENSDARG00000007171.9	562261	0	13.7596	16.8178	3.93655	2.97696	26.6702	0.981416	0.135285
LL0000032985	XLOC_006751		101882067	3.95367	7.8626	0	7.8731	0	0	1	-0.585449
LL0000024947	si:ch211-113j14.1	ENSDARG00000073764.4	558239	168.031	221.136	136.521	94.4772	98.2397	87.9129	0.0351977	-0.905622
LL0000003686	BX927218.1	ENSDARG00000094472.2		11.861	9.82826	2.96784	4.92069	3.96928	0	0.709386	-1.47173
LL0000034867	XLOC_020556			7.90735	73.7119	48.4748	22.6352	19.8464	22.7191	0.576774	-0.99667
LL0000023198	raph1b	ENSDARG00000061732.9	560319	1206.86	1345.49	1270.24	892.613	1172.92	1145.83	0.437073	-0.251393
LL0000010840	FQ378016.1	ENSDARG00000108939.2	571737	121.575	61.918	105.853	103.334	88.3165	97.7907	0.999826	0.000613089
LL0000029917	taf12	ENSDARG00000104030.2	386637	300.479	344.972	361.088	408.417	305.635	255.836	0.955776	-0.0534723
LL0000001220	aqp8b	ENSDARG00000089749.4	555598	22.7336	11.7939	5.93569	0	3.96928	0.987785	0.203451	-3.03082
LL0000013819	LO018154.1	ENSDARG00000091595.3	100330838	29.6526	104.18	70.239	68.8896	87.3242	60.2549	0.967159	0.0849357
LL0000020196	nelfb	ENSDARG00000035505.9	393137	95.8766	106.145	105.853	223.399	144.879	129.4	0.19813	0.692931
LL0000038503	zgc:110197	ENSDARG00000056794.7	550525	23.722	19.6565	32.6463	37.3972	52.593	31.6091	0.598793	0.677628
LL0000014852	LOC101884132			33.6062	0	0	77.7468	0	0	1	1.21011
LL0000014707	LOC101883319		101883319	29.6526	32.4332	10.8821	12.7938	18.8541	14.8168	0.755439	-0.651382
LL0000009884	exosc5	ENSDARG00000040557.8	751632	5.93051	13.7596	11.8714	30.5083	21.831	5.92671	0.717591	0.884437
LL0000020868	olfml2ba	ENSDARG00000005716.11	557997	154.193	113.025	86.0675	62.9848	64.5008	122.485	0.617349	-0.499068
LL0000013010	jak2b	ENSDARG00000018882.10	30298	794.688	827.539	810.222	774.516	839.503	800.106	0.984124	-0.0109293
LL0000039228	zgc:77151	ENSDARG00000054307.8	337153	1136.68	1146.96	1180.21	1165.22	1132.24	1072.73	0.936475	-0.0395409
LL0000021071	orc1	ENSDARG00000039217.10	554509	304.433	265.363	263.149	434.989	283.804	338.81	0.488382	0.344575
LL0000002026	brpf3a	ENSDARG00000070513.6	100149254	498.163	456.031	397.691	410.385	393.951	375.358	0.676461	-0.196559
LL0000031419	tyk2	ENSDARG00000020326.10	100536675	248.093	232.93	207.749	398.576	289.758	280.531	0.222162	0.49231
LL0000028888	slc9a6b	ENSDARG00000075382.5	556638	94.8882	109.094	93.9817	43.302	64.5008	95.8151	0.542044	-0.549361
LL0000024239	sbno1	ENSDARG00000099080.3	100005813	957.777	723.36	722.175	1030.39	922.858	832.703	0.632351	0.213167
LL0000008676	dapk2b	ENSDARG00000103666.3	556756	13.8379	24.5706	26.7106	7.8731	6.94624	6.91449	0.251624	-1.5831
LL0000020251	nfe2l2a	ENSDARG00000042824.7	360149	484.325	385.268	350.206	656.42	490.206	464.259	0.332479	0.401247
LL0000024670	shha	ENSDARG00000068567.8	30269	155.182	214.256	214.674	161.399	205.41	190.643	0.947651	-0.0674719
LL0000029019	smu1b	ENSDARG00000051970.5	570074	0	44.2272	32.6463	16.7303	22.8234	21.7313	0.940102	-0.327063
LL0000018288	lpar4	ENSDARG00000089824.3	794698	31.6294	12.7767	11.8714	7.8731	10.9155	15.8046	0.772639	-0.702065
LL0000021432	pcloa	ENSDARG00000063299.8	100148002	63.2588	141.527	139.489	84.6358	105.186	126.436	0.937856	-0.122523
LL0000029642	sub1b	ENSDARG00000007720.7	436778	48.4325	45.21	32.6463	70.8579	41.6775	33.5847	0.913191	0.210517
LL0000008790	ddx46	ENSDARG00000099458.2	321948	392.402	377.405	461.005	592.451	532.876	459.32	0.290041	0.364589
LL0000001864	bcs1l	ENSDARG00000012295.8	394157	12.8494	35.3817	54.4105	66.9213	56.5623	67.1694	0.444449	0.893375
LL0000022128	plekho1b	ENSDARG00000077499.4	562940	440.835	400.01	398.68	888.676	724.394	532.416	0.00578916	0.791538
LL0000004264	CABZ01061894.1	ENSDARG00000116712.1	100006548	202.626	261.432	206.76	244.066	191.518	323.006	0.845145	0.177395
LL0000026108	si:ch211-66h3.4	ENSDARG00000097600.2		0	0	17.8071	0	4.9616	1.97557	0.872528	-1.3603
LL0000012850	ireb2	ENSDARG00000021466.11	652982	529.792	373.474	457.048	534.387	390.974	516.612	0.920932	0.0841707
LL0000002871	BX511013.1	ENSDARG00000112403.1	103908633	8.89577	23.5878	0	33.4607	27.785	19.7557	0.614609	1.31787
LL0000027425	si:dkey-264b2.3		100150025	96.865	57.9867	159.274	20.6669	87.3242	70.1327	0.518708	-0.818555
LL0000005891	cnih3	ENSDARG00000014953.10	564015	0	2.94848	7.91425	0	0	8.89006	1	-0.289017
LL0000010704	FP085428.1	ENSDARG00000099965.2	335834	0	0	5.93569	15.7462	0	0	1	1.408
LL0000023861	ror2	ENSDARG00000076227.4	561183	1088.25	1113.54	1518.55	1933.83	2071.97	2170.16	0.000382421	0.731241
LL0000010800	FP325123.1	ENSDARG00000105359.2		708.696	497.31	456.059	723.341	356.243	397.09	0.870927	-0.170575
LL0000022695	PRRG3	ENSDARG00000079102.5	563290	15.8147	29.4848	39.5713	12.7938	46.6391	40.4992	0.930177	0.235514
LL0000022107	plekha8	ENSDARG00000040698.6	492502	354.842	304.676	268.095	256.86	311.589	190.643	0.656725	-0.289291
LL0000007443	csnk1e	ENSDARG00000045150.6	100006858	78.0851	67.815	21.7642	11.8096	18.8541	36.548	0.284027	-1.3189
LL0000031791	vamp3	ENSDARG00000070161.6	415163	517.931	426.546	412.53	434.005	395.936	407.955	0.821223	-0.132511
LL0000031187	trpc5b	ENSDARG00000060837.6	559586	0	0.982826	3.95713	15.7462	0	0	1	1.67289
LL0000014387	LOC100537377		100537377	165.066	135.63	135.532	88.5724	126.025	177.801	0.904702	-0.152793
LL0000025651	si:ch211-223a21.4	ENSDARG00000100842.3	100003496	23.722	25.5535	24.732	19.6827	15.8771	23.7068	0.882535	-0.320385
LL0000022227	pnpla7b	ENSDARG00000040002.8	503936	557.468	624.094	565.869	446.798	524.938	488.954	0.438271	-0.258637
LL0000026389	si:ch73-266f23.1	ENSDARG00000105728.2	569282	115.645	104.18	159.274	132.859	101.217	105.693	0.893693	-0.157896
LL0000009086	dnajc6	ENSDARG00000079891.5	796345	35.5831	21.6222	41.5498	14.7621	23.8157	16.7923	0.546174	-0.834814
LL0000031966	wasf2	ENSDARG00000024209.10	394056	968.65	622.129	652.926	866.041	657.908	567.976	0.913105	-0.101019
LL0000001197	apooa	ENSDARG00000104696.3	641319	62.2704	28.5019	23.7428	42.3179	46.6391	11.8534	0.947019	-0.183885
LL0000018853	mef2cb	ENSDARG00000009418.11	798771	1094.18	922.873	1013.02	527.498	635.085	515.624	8.6571e-06	-0.852457
LL0000003873	c13h10orf71		101884346	296.526	342.023	181.039	154.51	277.85	259.787	0.815116	-0.243915
LL0000020103	ndrg4	ENSDARG00000103937.2	692305	46.4557	81.5745	115.746	35.4289	42.6698	53.3404	0.306435	-0.891186
LL0000009649	eno2	ENSDARG00000014287.9	402874	22.7336	23.5878	18.7963	0	2.97696	2.96335	0.0196603	-3.45582
LL0000017579	LOC110439330		110439330	240.186	141.527	196.867	191.907	145.871	188.667	0.903003	-0.136123
LL0000023641	rhcgl1	ENSDARG00000007080.9	563826	5.93051	2.94848	13.8499	7.8731	0	1.97557	0.800481	-1.20558
LL0000017563	LOC110439309		110439309	25.6989	35.3817	43.5284	75.7786	51.6007	54.3282	0.371276	0.796706
LL0000019036	mif4gdb	ENSDARG00000102578.2	503596	222.394	109.094	180.049	197.812	108.163	200.52	0.991928	-0.0141666
LL0000039467	znf1085	ENSDARG00000101842.3	567150	27.6757	16.708	38.582	48.2227	27.785	31.6091	0.848408	0.375617
LL0000029779	syt13	ENSDARG00000012306.9	550345	0.988418	9.82826	1.97856	1.96827	15.8771	12.8412	0.740229	1.26115
LL0000025563	si:ch211-213d14.2	ENSDARG00000097483.3	568604	0	17.6909	0.989281	0	0	9.87785	0.920932	-0.919405
LL0000018343	lrp8	ENSDARG00000070074.7	557734	264.896	289.934	421.434	216.51	340.366	427.711	0.991458	0.0122366
LL0000022319	pop5	ENSDARG00000053452.6	541421	7.90735	14.7424	4.94641	11.8096	10.9155	11.8534	0.926412	0.325111
LL0000018079	LOC110440177		110440177	0	10.8111	0	0	3.96928	0	1	-1.44642
LL0000007736	ctif	ENSDARG00000090617.4	100537309	941.963	1136.15	909.15	896.549	842.48	754.668	0.422496	-0.260551
LL0000032349	XLOC_001283			38.5483	18.6737	28.6892	30.5083	19.8464	28.6458	0.958366	-0.120735
LL0000038781	zgc:158257		790941	0	11.7939	27.6999	38.3814	1.98464	7.90228	0.957538	0.289685
LL0000038648	zgc:123010	ENSDARG00000039082.9	641500	714.627	900.268	800.329	650.515	750.194	716.144	0.635638	-0.190276
LL0000017742	LOC110439554		110439554	2.96526	2.94848	18.7963	0	2.97696	0	0.441127	-3.0551
LL0000015541	LOC103908980		103908980	0	0	0.989281	0	0	9.87785	1	3.21922
LL0000004223	CABZ01058222.1	ENSDARG00000113674.1	108191687	12.8494	4.91413	6.92497	4.92069	20.8387	7.90228	0.91075	0.447085
LL0000012063	herc7	ENSDARG00000098906.2	567670	162.101	161.183	134.542	150.573	136.94	116.559	0.839716	-0.180189
LL0000024111	rwdd1	ENSDARG00000015930.8	436808	86.9808	79.6089	43.5284	188.954	112.132	60.2549	0.42902	0.782177
LL0000013989	LOC100148023		100148023	18.7799	50.1241	51.4426	56.0958	49.616	59.2671	0.765375	0.45504
LL0000020276	NFX1	ENSDARG00000105669.3	562071	700.789	788.226	669.744	816.834	664.855	791.216	0.904702	0.0743425
LL0000004992	cbsa	ENSDARG00000053500.7	550524	0.988418	7.8626	1.97856	48.2227	24.808	28.6458	0.0091655	3.22974
LL0000013547	lat	ENSDARG00000100334.2	100233211	0	15.7252	0	0	0	0	1	-4.85012
LL0000006269	CR354435.2	ENSDARG00000114169.1		1290.87	828.522	786.479	985.121	803.78	812.947	0.823261	-0.159414
LL0000039622	znf536	ENSDARG00000103648.3	565481	547.584	508.121	521.351	358.226	447.537	407.955	0.197333	-0.377841
LL0000024541	setdb1b	ENSDARG00000099021.2	768131	1804.85	1582.35	1783.67	1776.37	1796.1	2029.9	0.76369	0.115638
LL0000008048	CU570689.1	ENSDARG00000096111.2		17.7915	0	0	4.92069	4.9616	0	0.924225	-0.848179
LL0000020599	nr6a1b	ENSDARG00000014480.10	497167	56.3398	31.4504	49.4641	35.4289	51.6007	56.3037	0.974139	0.0625589
LL0000024346	sdhaf1	ENSDARG00000092478.3	606612	21.7452	19.6565	46.4962	16.7303	14.8848	26.6702	0.762023	-0.592532
LL0000013417	klhl43	ENSDARG00000053803.6	570492	305.421	213.273	171.146	47.2386	122.055	153.107	0.0963432	-1.09749
LL0000020092	ndnfl	ENSDARG00000076462.5	100148595	279.722	264.38	289.859	221.431	345.328	186.691	0.883594	-0.146533
LL0000006299	CR354588.1	ENSDARG00000105693.2	794462	750.21	1019.19	910.139	908.359	1017.13	1017.42	0.788014	0.135226
LL0000008991	dll4	ENSDARG00000070425.4	563920	701.777	775.449	608.408	1616.94	1544.05	1233.74	4.15045e-08	1.07527
LL0000009838	etv2	ENSDARG00000053868.5	555766	1260.23	900.268	1108	403.496	284.796	281.519	2.48032e-13	-1.75278
LL0000014197	LOC100333986		100333986	0	6.87978	1.97856	2.95241	3.96928	23.7068	0.647644	1.78908
LL0000018772	mcm3l	ENSDARG00000037532.5	100147915	8.89577	9.82826	36.6034	11.8096	19.8464	31.6091	0.954161	0.193534
LL0000007227	CR936321.1	ENSDARG00000094097.3	100536508	18.7799	57.9867	48.4748	48.2227	87.3242	79.0228	0.502673	0.776551
LL0000010042	fam199x	ENSDARG00000009982.5	445309	792.712	790.192	788.457	750.897	699.586	793.191	0.871	-0.0798381
LL0000016839	LOC108190593		108190593	0	30.4676	12.8607	27.5558	35.7235	18.7679	0.775449	0.920876
LL0000037134	XLOC_038611			22.7336	12.7767	13.8499	14.7621	36.7159	25.6824	0.743855	0.644407
LL0000030647	tmem72	ENSDARG00000069332.7	562321	10.8726	0	2.96784	0.984137	0.99232	5.92671	1	-0.808114
LL0000024288	scly	ENSDARG00000073813.5	559537	106.749	125.802	92.0032	162.383	99.232	144.217	0.71656	0.322453
LL0000031073	trim13	ENSDARG00000010010.11	553630	48.4325	119.905	113.767	102.35	117.094	121.498	0.837688	0.27322
LL0000008550	cyp1c2	ENSDARG00000101789.3	100137725	54.363	109.094	138.499	61.0165	50.6083	40.4992	0.19813	-0.989049
LL0000012490	ifit12	ENSDARG00000090977.4	567504	17.7915	10.8111	21.7642	2.95241	2.97696	3.95114	0.126764	-2.34969
LL0000023957	rprd2b	ENSDARG00000074676.4	556426	668.171	693.875	789.447	614.102	788.895	817.886	0.947839	0.0457773
LL0000023804	RNF208	ENSDARG00000078056.3	100526811	0	0.982826	0.989281	0	14.8848	0	1	2.91544
LL0000039470	znf1090	ENSDARG00000095521.4		36.5715	3.9313	2.96784	4.92069	0.99232	4.93892	0.488705	-2.00154
LL0000018589	map2k4b	ENSDARG00000077177.4	568951	374.611	259.466	295.795	335.591	278.842	448.454	0.81341	0.192935
LL0000020702	nuak1b	ENSDARG00000028676.9	561496	4128.62	3555.86	3203.29	3846.01	3504.88	2743.08	0.844865	-0.109215
LL0000027843	si:dkey-70p6.1	ENSDARG00000092039.3	570575	9.88418	7.8626	21.7642	8.85724	18.8541	15.8046	0.967159	0.139308
LL0000002956	BX511272.1	ENSDARG00000096397.2		15.8147	17.6909	7.91425	9.84137	2.97696	5.92671	0.63304	-1.14344
LL0000015716	LOC103909841		103909841	44.4788	25.5535	118.714	41.3338	38.7005	60.2549	0.828319	-0.427912
LL0000028427	sipa1l3	ENSDARG00000061699.7	561005	2420.64	2428.56	2497.94	1820.65	2223.79	2157.32	0.300998	-0.244516
LL0000021095	osbpl9	ENSDARG00000069298.6	777767	684.974	648.665	503.544	621.975	532.876	463.271	0.752254	-0.183169
LL0000013464	krt4	ENSDARG00000017624.9	794486	62823.9	111257	57901.7	17455.6	44878.7	32861.6	0.0764268	-1.28504
LL0000026522	si:ch73-376l24.6	ENSDARG00000093999.4	100334190	86.9808	100.248	90.0246	81.6834	89.3088	139.278	0.903527	0.162281
LL0000013950	LOC100005584		100005584	230.301	429.495	332.399	95.4613	102.209	124.461	4.23132e-06	-1.62303
LL0000022412	ppp1cbl	ENSDARG00000102012.3	334597	256	236.861	244.353	254.892	226.249	209.41	0.908224	-0.0942934
LL0000022681	prr14	ENSDARG00000089232.3	100001119	923.183	881.595	745.918	779.437	816.68	822.825	0.892111	-0.0765317
LL0000009077	dnajc30b	ENSDARG00000079415.4	565734	53.3746	29.4848	44.5177	42.3179	23.8157	54.3282	0.969836	-0.0803166
LL0000015173	LOC101885705		101885705	98.8418	114.008	103.875	62.9848	63.5085	48.4015	0.0978941	-0.856777
LL0000029142	socs6b	ENSDARG00000015863.9	322950	471.476	296.813	346.249	415.306	380.059	464.259	0.806142	0.176595
LL0000026770	si:dkey-14o6.1	ENSDARG00000098383.2	108184002	0.988418	0.982826	4.94641	19.6827	3.96928	6.91449	0.447626	2.14443
LL0000022402	ppm1k	ENSDARG00000010655.12	503713	493.221	406.89	454.08	388.734	419.752	483.027	0.924455	-0.0683562
LL0000020109	ndufa10	ENSDARG00000013333.9	321951	324.201	190.668	174.114	271.622	252.049	237.068	0.896427	0.142969
LL0000003863	BX957362.2	ENSDARG00000105717.2		0	13.7596	6.92497	0	6.94624	7.90228	0.946543	-0.478633
LL0000040471	si:dkey-27n6.1	ENSDARG00000099963.2		0.988418	18.6737	11.8714	9.84137	7.93856	3.95114	0.904702	-0.537261
LL0000021092	osbpl6	ENSDARG00000063730.7	100004342	1054.64	948.427	916.075	708.579	680.732	542.294	0.00681607	-0.595739
LL0000002476	BX279523.3	ENSDARG00000097362.2		8.89577	5.89695	23.7428	13.7779	27.785	27.658	0.700135	0.845195
LL0000022539	prelid1a	ENSDARG00000098671.2	393337	323.213	263.397	276.999	372.988	313.573	361.529	0.535965	0.279372
LL0000000152	accs	ENSDARG00000052124.8	541510	257.977	205.411	278.977	262.765	274.873	294.36	0.815461	0.1645
LL0000022440	ppp1r37	ENSDARG00000078458.4	562516	618.75	567.09	693.486	641.658	609.285	490.929	0.863027	-0.109552
LL0000011350	gjd2b	ENSDARG00000070781.6	378444	17.7915	0.982826	8.90353	0	0	1.97557	0.288912	-3.80806
LL0000006746	CR589947.1	ENSDARG00000079269.4	101884245	1.97684	25.5535	13.8499	18.6986	22.8234	27.658	0.783111	0.741112
LL0000012468	idh3b	ENSDARG00000044753.8	415247	201.637	180.84	205.771	274.574	190.526	180.765	0.888878	0.134899
LL0000017768	LOC110439590		110439590	26.6873	16.708	16.8178	12.7938	33.7389	25.6824	0.920932	0.262067
LL0000008263	CU856539.2	ENSDARG00000058946.7	556989	315.305	348.903	290.849	333.623	372.12	263.739	0.981107	0.0215751
LL0000003499	BX769173.2	ENSDARG00000111935.1	566988	0.988418	16.708	6.92497	5.90482	3.96928	1.97557	0.800481	-1.05518
LL0000012323	hs3st1		565201	39.5367	28.5019	30.6677	22.6352	20.8387	21.7313	0.674287	-0.598075
LL0000000823	AL954191.1	ENSDARG00000117407.1	101885516	10.8726	5.89695	2.96784	0	7.93856	0	0.82777	-1.31486
LL0000029372	srgap3	ENSDARG00000060309.7	561567	1216.74	1614.78	1358.28	1072.71	1328.72	1186.33	0.550476	-0.223836
LL0000023988	rps29	ENSDARG00000041232.6	405889	299.491	158.235	157.296	429.084	255.026	225.215	0.432871	0.564227
LL0000017144	LOC110438040		110438040	84.0156	193.617	134.542	134.827	161.748	136.314	0.95993	0.0706284
LL0000028185	si:dkeyp-44d3.5	ENSDARG00000101916.2		16.8031	0	0	0	0	0	1	-4.94557
LL0000022280	polr2h	ENSDARG00000038505.6	550263	25.6989	39.313	23.7428	116.128	45.6467	57.2915	0.123549	1.30345
LL0000021771	PIGG	ENSDARG00000038270.7	100538291	158.147	191.651	170.156	203.716	168.694	142.241	0.989157	-0.0147789
LL0000031079	trim2a	ENSDARG00000031817.8	100003782	15.8147	36.3645	44.5177	31.4924	29.7696	36.548	0.993946	0.0165066
LL0000025879	si:ch211-257p13.3	ENSDARG00000053431.7	793121	74.1314	62.9008	62.3247	39.3655	51.6007	77.0472	0.867505	-0.246811
LL0000004466	CABZ01078080.1	ENSDARG00000105497.2		5.93051	8.84543	5.93569	9.84137	1.98464	4.93892	0.947473	-0.304623
LL0000038866	zgc:162989	ENSDARG00000110496.1	100037351	0	3.9313	15.8285	14.7621	12.9002	16.7923	0.736814	1.17
LL0000009120	dnph1	ENSDARG00000075730.4	561810	12.8494	15.7252	16.8178	25.5876	3.96928	7.90228	0.939634	-0.276712
LL0000031351	tuba7l	ENSDARG00000104643.3	431777	0	9.82826	5.93569	10.8255	9.9232	2.96335	0.914051	0.588708
LL0000014537	LOC101882453		101882453	53.3746	128.75	90.0246	126.954	102.209	82.9739	0.899309	0.197713
LL0000031601	ugt8	ENSDARG00000037455.8	553508	33.6062	34.3989	70.239	91.5248	115.109	74.0839	0.169389	1.02199
LL0000026338	si:ch73-233f7.6	ENSDARG00000101667.2		11.861	37.3474	85.0782	27.5558	11.9078	25.6824	0.550952	-1.04337
LL0000000089	abhd17ab	ENSDARG00000043084.6	100003419	768.001	639.819	702.39	516.672	426.698	381.285	0.00562837	-0.671724
LL0000030093	tcirg1b	ENSDARG00000105142.2	406342	580.202	535.64	443.198	527.498	386.013	310.164	0.504281	-0.349407
LL0000003854	BX957346.1	ENSDARG00000096850.3	563917	1130.75	1100.76	1314.76	974.296	949.651	1021.37	0.298707	-0.267862
LL0000011172	gatd3a	ENSDARG00000020618.10	550355	56.3398	37.3474	32.6463	62.0006	23.8157	19.7557	0.913136	-0.25878
LL0000010451	FO082780.1	ENSDARG00000115528.1		4.94209	9.82826	6.92497	16.7303	9.9232	7.90228	0.824905	0.671496
LL0000022742	psmb10	ENSDARG00000043781.6	436816	53.3746	59.9524	57.3783	64.9531	66.4855	59.2671	0.91138	0.159806
LL0000038156	XLOC_044113			17.7915	13.7596	27.6999	25.5876	1.98464	15.8046	0.898434	-0.449486
LL0000009776	ERG28	ENSDARG00000111290.1	565132	38.5483	10.8111	7.91425	6.88896	7.93856	6.91449	0.494819	-1.39736
LL0000032821	XLOC_005199			0	3.9313	0.989281	3.93655	19.8464	5.92671	0.403221	2.59257
LL0000013197	kcnq3	ENSDARG00000060085.6	799747	26.6873	10.8111	35.6141	8.85724	15.8771	34.5725	0.921554	-0.301824
LL0000016755	LOC108183935		108183935	0	12.7767	0	0	4.9616	10.8656	0.973192	0.308445
LL0000001326	arhgef6	ENSDARG00000006683.11	558288	406.24	450.134	464.962	816.834	581.5	630.207	0.0193377	0.618478
LL0000028862	slc7a3b	ENSDARG00000061566.7	100003376	296.526	437.357	292.827	498.958	692.64	626.256	0.00743049	0.824122
LL0000008946	DIPK2B	ENSDARG00000061747.7	569232	334.085	274.208	317.559	248.987	291.742	259.787	0.704214	-0.209858
LL0000006071	coq2	ENSDARG00000059510.6	100037331	39.5367	33.4161	34.6249	68.8896	58.5469	71.1205	0.200682	0.884254
LL0000009945	FADS6	ENSDARG00000091503.3	100538024	0.988418	8.84543	10.8821	8.85724	9.9232	22.7191	0.744898	1.00227
LL0000021189	p4ha2	ENSDARG00000010085.12	373132	520.897	588.713	830.007	432.036	478.298	624.28	0.518507	-0.337887
LL0000038900	zgc:171220	ENSDARG00000102959.2	100126101	61.2819	83.5402	92.9925	86.6041	94.2704	95.8151	0.848773	0.218401
LL0000001352	arl15b	ENSDARG00000057995.7	560030	153.205	161.183	201.813	208.637	205.41	164.96	0.846763	0.165677
LL0000026453	si:ch73-329n5.1	ENSDARG00000103650.2	108179152	0	21.6222	28.6892	1.96827	6.94624	3.95114	0.531139	-1.96774
LL0000009099	dnase1l4.2	ENSDARG00000011376.10	393843	36.5715	44.2272	45.5069	128.922	34.7312	51.3648	0.546845	0.767686
LL0000018585	map2k1	ENSDARG00000007825.10	406728	138.379	172.977	92.9925	84.6358	98.2397	84.9495	0.366604	-0.594426
LL0000000032	abca4b	ENSDARG00000062661.10	555506	32.6178	55.0382	21.7642	2.95241	3.96928	2.96335	0.000797235	-3.4689
LL0000007222	CR933839.1	ENSDARG00000097821.3		0	0	0	15.7462	0	0	1	4.85384
LL0000002807	BX470242.1	ENSDARG00000095808.3	103908895	1.97684	15.7252	24.732	21.651	40.6851	10.8656	0.782488	0.786552
LL0000038087	XLOC_043852			51.3978	25.5535	16.8178	0.984137	17.8618	10.8656	0.363985	-1.65857
LL0000024676	shisa6	ENSDARG00000115501.1	796884	0	16.708	24.732	10.8255	6.94624	8.89006	0.89052	-0.636179
LL0000012306	hps5	ENSDARG00000071062.6	100037388	296.526	244.724	214.674	200.764	163.733	133.351	0.171099	-0.602488
LL0000006085	coro1cb	ENSDARG00000021193.10	562849	619.738	516.966	509.48	649.531	465.398	379.309	0.863639	-0.139676
LL0000023183	RAP1GDS1	ENSDARG00000073741.4	100334870	170.996	219.17	197.856	252.923	174.648	207.435	0.91138	0.110938
LL0000039619	ZNF521_1_of_many	ENSDARG00000116769.1	108180213	4330.26	4274.31	3795.87	1626.78	1981.66	1489.58	3.83825e-15	-1.2824
LL0000007099	CR854941.1	ENSDARG00000117278.1		15.8147	18.6737	27.6999	45.2703	18.8541	10.8656	0.925661	0.270302
LL0000028208	si:dkeyp-53d3.3	ENSDARG00000098664.2	562337	9.88418	11.7939	16.8178	13.7779	26.7927	14.8168	0.829504	0.524724
LL0000018977	mgst3a	ENSDARG00000102744.2	406736	23.722	60.9352	58.3676	67.9055	66.4855	64.206	0.718921	0.473501
LL0000018704	mat2b	ENSDARG00000012932.10	541347	34.5946	63.8837	92.9925	112.192	98.2397	76.0594	0.573378	0.581403
LL0000029619	STX3	ENSDARG00000051981.6	571872	0.988418	25.5535	8.90353	3.93655	18.8541	5.92671	0.949391	-0.304228
LL0000004583	CABZ01085878.1	ENSDARG00000104869.2	100332622	70.1777	27.5191	53.4212	103.334	81.3703	53.3404	0.557039	0.655734
LL0000007264	crabp1b	ENSDARG00000035904.5	415102	41.5136	62.9008	18.7963	48.2227	10.9155	15.8046	0.731515	-0.717088
LL0000030081	tcf3a	ENSDARG00000005915.12	30310	2631.17	2796.14	2776.91	2444.6	2490.72	3137.21	0.967159	-0.0233474
LL0000009917	f3a	ENSDARG00000099124.2	567257	257.977	458.98	397.691	191.907	328.458	412.894	0.795496	-0.256293
LL0000024371	sec16b	ENSDARG00000099554.2	553356	72.1545	36.3645	14.8392	22.6352	34.7312	15.8046	0.68538	-0.753625
LL0000024383	sec31a	ENSDARG00000021082.11	266638	1401.58	1280.62	1184.17	1444.71	1299.94	1339.44	0.867505	0.0790457
LL0000016377	LOC108179808		108179808	11.861	15.7252	12.8607	10.8255	2.97696	10.8656	0.802018	-0.713066
LL0000031428	tyw1	ENSDARG00000062987.9	562076	537.7	492.396	550.04	589.498	571.577	559.086	0.79192	0.122522
LL0000028788	slc47a2.1	ENSDARG00000060051.6	560024	0	0.982826	0	5.90482	25.8003	14.8168	0.0146653	5.45472
LL0000011356	gla	ENSDARG00000036155.8	450083	6.91893	16.708	10.8821	37.3972	14.8848	3.95114	0.820483	0.704469
LL0000028718	slc35f2	ENSDARG00000069745.4	555929	102.796	47.1756	16.8178	55.1117	56.5623	100.754	0.875059	0.348961
LL0000032003	wdr27	ENSDARG00000053386.7	641503	0.988418	10.8111	10.8821	7.8731	2.97696	11.8534	0.999826	0.00144431
LL0000031129	trim8a	ENSDARG00000090512.4	101180910	909.345	808.865	766.693	782.389	725.386	808.996	0.837247	-0.101059
LL0000021910	pimr214	ENSDARG00000103365.2	100002647	0	16.708	0	0	0	1.97557	1	-3.08026
LL0000009792	ero1b	ENSDARG00000103915.3	767700	341.993	456.031	341.302	423.179	393.951	348.688	0.968572	0.0331247
LL0000003520	BX855614.3	ENSDARG00000101193.3	103910998	60.2935	67.815	85.0782	45.2703	115.109	62.2305	0.973197	0.0622528
LL0000011111	galnt12	ENSDARG00000055490.6	559736	1020.05	878.646	668.754	629.848	686.686	599.585	0.19813	-0.422165
LL0000028296	si:dkeyp-86c4.1	ENSDARG00000098179.2		0	2.94848	5.93569	7.8731	15.8771	2.96335	0.681721	1.5882
LL0000030615	tmem41ab	ENSDARG00000026771.7	406356	0	9.82826	9.89281	0	2.97696	2.96335	0.755439	-1.73171
LL0000038409	zfand4	ENSDARG00000076703.5	100148477	328.155	368.56	282.934	382.829	262.965	268.678	0.914222	-0.0992969
LL0000000132	acad9	ENSDARG00000055620.7	724002	422.055	381.336	325.474	527.498	402.882	406.967	0.636142	0.244532
LL0000025811	si:ch211-246i5.5	ENSDARG00000097637.2	100536506	82.0387	120.888	160.264	104.319	125.032	203.484	0.843538	0.25309
LL0000022940	pus1	ENSDARG00000045562.7	494060	69.1893	31.4504	77.164	104.319	66.4855	98.7785	0.563313	0.60066
LL0000007166	CR925761.2	ENSDARG00000100118.2	110437858	12.8494	1.96565	0	3.93655	0	0	1	-1.91107
LL0000020168	nectin4a	ENSDARG00000077419.6	560512	40.5252	118.922	60.3462	12.7938	42.6698	23.7068	0.140213	-1.4735
LL0000023451	RF00099	ENSDARG00000083784.2		11.861	28.5019	17.8071	42.3179	34.7312	30.6213	0.495636	0.888075
LL0000010799	FP325112.2	ENSDARG00000097791.2	103911456	0	5.89695	0.989281	7.8731	2.97696	1.97557	1	0.896675
LL0000001296	arhgap5	ENSDARG00000061294.7	795752	3333.94	3608.94	3383.34	2569.58	3173.44	3310.07	0.542373	-0.189841
LL0000022113	plekhg2	ENSDARG00000058459.5	565988	4168.16	3257.08	3395.21	2298.94	2426.22	2954.46	0.0233068	-0.49465
LL0000013182	kcnk5a	ENSDARG00000023587.8	570159	13.8379	76.6604	65.2926	22.6352	67.4778	74.0839	0.978413	0.0756699
LL0000004365	CABZ01070631.1	ENSDARG00000110183.1	100537850	360.773	653.579	571.805	428.1	510.053	536.367	0.912809	-0.105329
LL0000009978	fam126a	ENSDARG00000026762.6	402926	178.904	248.655	234.46	259.812	233.195	260.775	0.789994	0.187264
LL0000036622	XLOC_034192			3.95367	9.82826	14.8392	7.8731	10.9155	2.96335	0.923801	-0.396068
LL0000018309	lrch3	ENSDARG00000100679.3	100126105	1152.5	951.375	1063.48	860.136	1036.97	1118.17	0.91138	-0.0709852
LL0000019393	mmgt1	ENSDARG00000010553.8	402891	249.081	238.827	216.653	318.86	229.226	253.861	0.786825	0.186838
LL0000005820	clns1a	ENSDARG00000103027.2	30699	337.051	216.222	217.642	348.385	198.464	220.276	0.995139	-0.00702484
LL0000019857	mylk4b	ENSDARG00000055412.8	449707	2.96526	39.313	30.6677	28.54	12.9002	21.7313	0.953714	-0.207546
LL0000011057	gabpb2a	ENSDARG00000007943.8	554849	91.9229	64.8665	121.682	167.303	102.209	169.899	0.346231	0.658209
LL0000001798	barx2	ENSDARG00000041098.7	100002200	52.3862	22.605	12.8607	15.7462	21.831	43.4625	0.968716	-0.116437
LL0000029497	stag3	ENSDARG00000104388.2	100333021	26.6873	23.5878	15.8285	9.84137	18.8541	4.93892	0.612694	-0.975136
LL0000031358	tubb2b	ENSDARG00000098591.2	641421	6372.33	4352.93	4625.88	5839.87	4198.51	4040.04	0.852494	-0.124854
LL0000012144	hivep2b	ENSDARG00000018773.8	100536055	44.4788	23.5878	37.5927	14.7621	31.7543	38.5236	0.888463	-0.313252
LL0000011574	gpm6bb	ENSDARG00000001676.12	503756	969.638	1121.4	1166.36	793.215	1134.22	1009.52	0.781229	-0.149435
LL0000004362	CABZ01070469.1	ENSDARG00000113254.1	100002384	2.96526	2.94848	0.989281	0.984137	0	13.829	1	1.10148
LL0000020255	nfic	ENSDARG00000043210.8	100005568	1800.9	1845.75	2045.83	688.896	726.379	934.445	2.15331e-12	-1.27657
LL0000025109	si:ch211-145o7.3	ENSDARG00000061548.7	100003583	3.95367	16.708	16.8178	7.8731	18.8541	10.8656	0.999826	0.00403357
LL0000014166	LOC100333051		100333051	0	1.96565	0	17.7145	0	13.829	0.330775	4.00211
LL0000027939	si:dkey-7l6.3	ENSDARG00000094514.3	570117	395.367	314.504	290.849	289.336	253.042	191.63	0.334869	-0.447141
LL0000025729	si:ch211-234c11.2	ENSDARG00000109255.1	100330526	28.6641	15.7252	28.6892	22.6352	21.831	49.3892	0.872173	0.361154
LL0000001516	atad5b	ENSDARG00000101126.2	321619	303.444	382.319	388.788	350.353	425.705	507.721	0.639925	0.256632
LL0000016650	LOC108183497		108183497	0	16.708	0	17.7145	0	0	0.993405	0.0843792
LL0000008761	ddost	ENSDARG00000037318.6	406408	2017.36	1909.63	1751.03	2349.14	2274.4	1720.72	0.713147	0.160062
LL0000008453	cwf19l2	ENSDARG00000091760.4	619271	57.3283	93.3684	89.0353	101.366	105.186	81.9862	0.814877	0.267274
LL0000021181	p2ry6		566099	35.5831	41.2787	23.7428	44.2862	40.6851	65.1938	0.639901	0.577759
LL0000037699	XLOC_042596			94.8882	62.9008	114.757	189.938	198.464	209.41	0.00474545	1.13333
LL0000003518	BX855614.1	ENSDARG00000094551.4	555910	239.197	228.016	233.47	228.32	319.527	316.091	0.564023	0.302118
LL0000013754	lnx1	ENSDARG00000043323.9	561226	43.4904	77.6432	114.757	69.8737	80.378	78.035	0.978747	-0.047273
LL0000011433	gna11b	ENSDARG00000053326.7	493613	2572.85	2221.19	2475.18	1845.26	2027.31	2307.47	0.395007	-0.234184
LL0000000130	acad11	ENSDARG00000045411.7	393147	157.159	106.145	100.907	117.112	94.2704	108.656	0.869213	-0.186442
LL0000031031	trappc13	ENSDARG00000033768.8	321203	153.205	125.802	113.767	129.906	129.994	96.8029	0.903527	-0.138975
LL0000030595	tmem259	ENSDARG00000060442.5	571445	823.353	765.621	891.343	816.834	836.526	810.971	0.988008	-0.00931256
LL0000010167	fbln5	ENSDARG00000039273.7	449806	296.526	308.607	280.956	320.829	354.258	325.969	0.736312	0.175957
LL0000039679	znf983	ENSDARG00000071714.5	560276	221.406	167.08	199.835	173.208	192.51	245.958	0.956867	0.0561941
LL0000039675	znf977	ENSDARG00000106667.2	103910561	258.966	154.304	249.299	250.955	196.479	258.8	0.933956	0.0921806
LL0000030356	tle2b	ENSDARG00000008767.12	564019	341.004	310.573	342.291	246.034	283.804	199.533	0.245799	-0.446427
LL0000039510	znf1132	ENSDARG00000095198.4		60.2935	28.5019	18.7963	23.6193	10.9155	21.7313	0.553025	-0.934998
LL0000004893	caprin1b	ENSDARG00000054272.6	406341	1950.15	1407.41	1955.81	2513.49	1834.8	2288.7	0.365614	0.320927
LL0000012620	igsf5b	ENSDARG00000090953.3	101884674	21.7452	35.3817	41.5498	65.9372	87.3242	83.9617	0.0483166	1.26539
LL0000024629	sh3bp4	ENSDARG00000030104.7	569399	273.792	186.737	195.878	399.56	274.873	243.983	0.373012	0.484628
LL0000027664	si:dkey-42l23.4	ENSDARG00000097782.2	100150474	0	0.982826	0	15.7462	19.8464	10.8656	0.00789509	5.45285
LL0000014126	LOC100331720		100331720	0	51.1069	20.7749	60.0324	89.3088	129.4	0.232074	1.95501
LL0000031674	urb2	ENSDARG00000003217.12	570267	257.977	176.909	199.835	469.433	390.974	373.383	0.000895344	0.958976
LL0000032792	XLOC_004991			3.95367	8.84543	6.92497	0	7.93856	20.7435	0.920932	0.539988
LL0000019489	mpp2b	ENSDARG00000010957.13	431770	20.7568	21.6222	15.8285	1.96827	3.96928	14.8168	0.4611	-1.48789
LL0000015093	LOC101885342		101885342	45.4672	95.3341	49.4641	18.6986	79.3856	111.62	0.955776	0.140184
LL0000029911	tada2a	ENSDARG00000031562.10	797303	182.857	157.252	154.328	159.43	96.2551	149.156	0.729732	-0.288318
LL0000027813	si:dkey-65j4.2	ENSDARG00000101476.2	101886927	0	2.94848	0	4.92069	2.97696	14.8168	0.454726	2.94359
LL0000025637	si:ch211-221n20.2	ENSDARG00000095671.3		31.6294	0	10.8821	7.8731	20.8387	5.92671	0.954593	-0.295483
LL0000012189	hmox2a	ENSDARG00000114695.1	100002875	94.8882	102.214	93.9817	110.223	108.163	132.363	0.747578	0.26899
LL0000026761	si:dkey-14d8.1	ENSDARG00000095332.4	558690	287.63	269.294	269.085	375.94	235.18	234.105	0.974139	0.0332532
LL0000009494	eif2s3	ENSDARG00000008292.9	327341	1608.16	1054.57	1261.33	2109.99	1354.52	1443.15	0.5017	0.322714
LL0000038240	yars	ENSDARG00000035913.5	368235	236.232	136.613	183.017	461.56	221.287	202.496	0.325572	0.671603
LL0000008501	cxcr3.3	ENSDARG00000070669.6	799527	108.726	74.6947	72.2175	95.4613	67.4778	72.1083	0.933942	-0.121032
LL0000015158	LOC101885646		101885646	587.121	405.907	360.098	188.954	79.3856	107.669	6.91737e-06	-1.8473
LL0000004438	CABZ01075125.1	ENSDARG00000102972.2		25.6989	27.5191	29.6784	14.7621	27.785	29.6335	0.931827	-0.199856
LL0000038753	zgc:153896	ENSDARG00000003977.12	569930	11.861	4.91413	15.8285	6.88896	7.93856	16.7923	0.990401	-0.0439743
LL0000009788	erlin2	ENSDARG00000095968.2		32.6178	24.5706	43.5284	23.6193	2.97696	11.8534	0.370271	-1.3887
LL0000021793	pik3ap1	ENSDARG00000078285.5	100002256	19.7684	37.3474	35.6141	116.128	101.217	71.1205	0.00511355	1.63721
LL0000031750	utp20	ENSDARG00000099280.2	557849	737.36	626.06	530.255	1330.55	1031.02	963.09	0.000943391	0.812034
LL0000004383	CABZ01072096.1	ENSDARG00000079483.4	100537790	280.711	338.092	278.977	246.034	207.395	232.129	0.325238	-0.389077
LL0000023764	rnf128a	ENSDARG00000016867.6	322325	156.17	220.153	170.156	124.985	165.718	180.765	0.812655	-0.213115
LL0000025691	si:ch211-227n13.3	ENSDARG00000101271.2	558023	162.101	127.767	189.942	146.636	159.764	149.156	0.945335	-0.074785
LL0000025118	si:ch211-147k10.5	ENSDARG00000029431.8	557634	170.008	285.019	227.535	55.1117	55.5699	54.3282	1.2113e-08	-2.04846
LL0000010713	FP101887.1	ENSDARG00000095427.4	100536566	29.6526	46.1928	72.2175	54.1276	63.5085	68.1572	0.830402	0.327505
LL0000001240	arf5	ENSDARG00000070472.6	378724	1091.21	946.461	874.525	1246.9	1004.23	805.045	0.927652	0.0696337
LL0000028703	slc35b2	ENSDARG00000007886.11	402931	227.336	184.771	203.792	222.415	209.38	193.606	0.981217	0.022134
LL0000009031	dnah6	ENSDARG00000000606.12	100148193	51.3978	46.1928	32.6463	65.9372	82.3626	50.377	0.535965	0.609183
LL0000021215	pagr1	ENSDARG00000076966.5	326076	118.61	55.0382	118.714	113.176	86.3319	91.864	0.999691	-0.00473609
LL0000036938	XLOC_036622			0	39.313	28.6892	23.6193	15.8771	15.8046	0.947187	-0.298317
LL0000036759	XLOC_035318			27.6757	66.8321	42.5391	60.0324	31.7543	69.1449	0.91138	0.231744
LL0000001826	bcas2	ENSDARG00000043631.7	493614	124.541	64.8665	56.389	154.51	86.3319	58.2793	0.867505	0.283369
LL0000024557	sf3b5	ENSDARG00000016855.6	436751	26.6873	26.5363	27.6999	46.2545	45.6467	37.5358	0.526758	0.677632
LL0000014698	LOC101883269		101883269	0	35.3817	13.8499	0.984137	10.9155	5.92671	0.711013	-1.46606
LL0000025508	si:ch211-207l14.1	ENSDARG00000098376.2	562414	8.89577	9.82826	20.7749	3.93655	4.9616	19.7557	0.904166	-0.462983
LL0000000494	ahi1	ENSDARG00000044056.9	562701	496.186	459.962	580.708	434.005	516.007	645.024	0.947868	0.0536104
LL0000013081	kbtbd11	ENSDARG00000104958.3	557467	211.522	252.586	262.16	185.018	175.641	209.41	0.466089	-0.349357
LL0000038528	zgc:110843	ENSDARG00000073845.4	541492	37.5599	66.8321	36.6034	49.2069	71.4471	35.5603	0.941963	0.147642
LL0000033504	XLOC_010875			0	8.84543	14.8392	5.90482	0.99232	27.658	0.925387	0.545014
LL0000004415	CABZ01073736.1	ENSDARG00000099438.2	368273	2.96526	14.7424	25.7213	52.1593	61.5239	35.5603	0.135103	1.78096
LL0000004587	CABZ01086127.1	ENSDARG00000117547.1		109.714	114.008	104.864	36.4131	32.7466	69.1449	0.0319175	-1.24839
LL0000002782	BX470116.1	ENSDARG00000117423.1		0	18.6737	13.8499	33.4607	18.8541	27.658	0.607393	1.29787
LL0000001685	atxn7l3	ENSDARG00000029331.7	368510	102.796	228.998	227.535	147.621	196.479	195.581	0.970396	-0.0516501
LL0000015990	LOC103910817			0	0	0	13.7779	0	0	1	4.6612
LL0000032153	wu:fi36c02		334211	89.9461	127.767	125.639	124.985	91.2935	75.0717	0.83512	-0.236886
LL0000020308	nif3l1	ENSDARG00000045249.9	574421	35.5831	48.1585	53.4212	28.54	39.6928	32.5969	0.743274	-0.444092
LL0000030503	tmem165	ENSDARG00000034600.5	324501	409.205	350.869	358.12	398.576	436.621	420.796	0.736312	0.167656
LL0000024683	shisal1b	ENSDARG00000067710.6	100330736	0	21.6222	25.7213	12.7938	15.8771	19.7557	0.993946	0.0325658
LL0000008878	dhh	ENSDARG00000037062.6	558147	15.8147	25.5535	68.2604	23.6193	12.9002	27.658	0.687656	-0.772273
LL0000023884	rpe65c	ENSDARG00000054420.7	100004076	38.5483	69.7806	75.1854	55.1117	46.6391	69.1449	0.954423	-0.102767
LL0000035481	XLOC_025822			29.6526	9.82826	15.8285	28.54	10.9155	11.8534	0.973826	-0.10793
LL0000003931	c6h1orf226		108179105	187.799	130.716	97.9389	69.8737	83.3549	80.0106	0.141074	-0.836389
LL0000015406	LOC101886876		101886876	32.6178	27.5191	53.4212	22.6352	29.7696	32.5969	0.807006	-0.417828
LL0000003759	BX936320.1	ENSDARG00000092398.2	101886778	9.88418	12.7767	5.93569	10.8255	14.8848	25.6824	0.7087	0.845465
LL0000031700	usp13	ENSDARG00000079198.4	558011	194.718	209.342	142.457	132.859	152.817	170.887	0.74008	-0.259529
LL0000037353	XLOC_040069			60.2935	116.956	91.0139	77.7468	56.5623	95.8151	0.880163	-0.221251
LL0000008781	ddx39aa	ENSDARG00000006225.8	325550	752.186	401.976	503.544	780.421	604.323	591.683	0.713147	0.25375
LL0000022348	ppap2d	ENSDARG00000069940.6	559124	289.607	315.487	283.924	234.225	274.873	197.557	0.483725	-0.331268
LL0000003884	c1d	ENSDARG00000021112.7	474329	102.796	51.1069	63.314	133.843	80.378	121.498	0.455995	0.628273
LL0000013962	LOC100006649		100006649	0	0	0	13.7779	1.98464	0.987785	1	4.94313
LL0000029721	swsap1	ENSDARG00000093423.2	100329809	7.90735	7.8626	8.90353	3.93655	2.97696	9.87785	0.889715	-0.555117
LL0000009850	evi5b	ENSDARG00000070839.7	553306	834.225	823.608	878.482	598.355	588.446	722.071	0.0826642	-0.410002
LL0000022093	pld2	ENSDARG00000034262.8	565743	204.603	298.779	231.492	236.193	203.426	213.362	0.828535	-0.170484
LL0000040136	sec14l1	ENSDARG00000103991.2	394073	86.9808	97.2997	86.0675	101.366	74.424	96.8029	0.992284	0.0119836
LL0000031972	washc4	ENSDARG00000061719.6	565752	588.109	495.344	537.18	533.402	462.421	514.636	0.862247	-0.101522
LL0000034926	XLOC_021043			6.91893	9.82826	13.8499	14.7621	22.8234	32.5969	0.438766	1.1977
LL0000017263	LOC110438247		110438247	21.7452	6.87978	5.93569	3.93655	19.8464	8.89006	0.984494	-0.0812753
LL0000021381	pcdh1g32	ENSDARG00000100829.2	554016	155.182	103.197	195.878	55.1117	120.071	180.765	0.799925	-0.351853
LL0000027262	si:dkey-238f9.1	ENSDARG00000079446.6	100333587	17.7915	18.6737	8.90353	47.2386	50.6083	28.6458	0.128439	1.47908
LL0000028267	si:dkeyp-79b7.3	ENSDARG00000099410.2		4.94209	31.4504	31.657	26.5717	21.831	87.9129	0.614698	1.00224
LL0000000269	adam19a	ENSDARG00000059693.6	565342	750.21	724.342	668.754	646.578	817.672	593.659	0.933952	-0.0586948
LL0000027940	si:dkey-7n6.2	ENSDARG00000094602.2	555852	0	0	0	10.8255	0	5.92671	1	4.94323
LL0000029616	stx1b	ENSDARG00000000503.15	58038	61.2819	114.008	152.349	21.651	97.2474	94.8274	0.682345	-0.616461
LL0000028750	slc39a13	ENSDARG00000000442.11	368686	292.572	312.539	291.838	335.591	222.28	252.873	0.853377	-0.145714
LL0000021909	pimr213	ENSDARG00000073913.5	558531	0	9.82826	0	0	0	0	1	-4.17207
LL0000014575	LOC101882638			60.2935	45.21	58.3676	49.2069	14.8848	76.0594	0.922989	-0.225415
LL0000039874	LOC100330746	ENSDARG00000032126.7	100330746	0	0	0	0	2.97696	12.8412	1	4.86028
LL0000031907	vps72b	ENSDARG00000088567.6	795272	36.5715	27.5191	52.4319	37.3972	33.7389	83.9617	0.816826	0.412698
LL0000029399	srsf1a	ENSDARG00000057691.7	406288	1992.65	1473.26	1650.12	2539.07	1953.88	1859.01	0.36187	0.312198
LL0000039370	zmp:0000001175	ENSDARG00000077415.4		11.861	24.5706	21.7642	0	40.6851	35.5603	0.929084	0.389565
LL0000011298	ggt5a	ENSDARG00000052045.9	569734	573.283	686.995	589.612	539.307	637.07	453.393	0.735061	-0.182816
LL0000024358	sdr16c5a	ENSDARG00000016233.7	405814	113.668	148.407	110.8	75.7786	83.3549	79.0228	0.226281	-0.64688
LL0000018708	matn3b	ENSDARG00000069265.6	497645	0	2.94848	16.8178	0	0	8.89006	0.892111	-1.15264
LL0000021758	picalma	ENSDARG00000012866.13	393901	706.719	772.501	735.036	464.513	513.03	462.283	0.00100486	-0.620963
LL0000021154	oxnad1	ENSDARG00000062664.8	558500	140.355	114.008	99.9174	167.303	128.009	150.143	0.653183	0.330452
LL0000027097	si:dkey-20i20.7	ENSDARG00000093562.2		50.4093	130.716	96.9496	118.096	77.401	139.278	0.857732	0.267686
LL0000018453	ltv1	ENSDARG00000008490.9	436587	136.402	110.076	200.824	344.448	199.456	222.252	0.146768	0.776512
LL0000012816	ipcef1	ENSDARG00000099252.2	767791	27.6757	15.7252	21.7642	134.827	73.4317	54.3282	0.00341035	2.01086
LL0000013106	kcnc1a	ENSDARG00000051852.6	565419	1.97684	17.6909	43.5284	0	12.9002	33.5847	0.932656	-0.443106
LL0000034693	XLOC_019062			7.90735	1.96565	6.92497	0	8.93088	4.93892	0.964262	-0.276615
LL0000008843	desi1a	ENSDARG00000033140.6	393673	5.93051	4.91413	15.8285	18.6986	3.96928	0	0.967159	-0.234288
LL0000038777	zgc:154142	ENSDARG00000100792.3	555481	0	1.96565	0	12.7938	0	1.97557	1	2.90812
LL0000026471	si:ch73-340m8.2	ENSDARG00000040258.8	100332982	19.7684	18.6737	18.7963	9.84137	13.8925	18.7679	0.859174	-0.429546
LL0000001921	blk	ENSDARG00000007783.11	567764	0	0	0.989281	7.8731	8.93088	3.95114	1	4.2904
LL0000022337	pou3f3b	ENSDARG00000095896.2	30321	652.356	806.9	1298.93	434.989	591.423	851.471	0.31797	-0.554613
LL0000001356	arl3	ENSDARG00000071409.4	797451	159.135	210.325	259.192	292.289	170.679	203.484	0.945335	0.0843158
LL0000014276	LOC100535347		100535347	0	0	12.8607	0	1.98464	4.93892	1	-0.893315
LL0000039265	zgc:91910	ENSDARG00000035678.6	445276	286.641	208.359	194.888	310.987	284.796	243.983	0.648478	0.283655
LL0000029436	sst1.2	ENSDARG00000033161.5	565781	22.7336	2.94848	0.989281	0	0	0	0.126252	-5.61217
LL0000039196	zgc:65894	ENSDARG00000016301.7	335798	23.722	3.9313	16.8178	4.92069	5.95392	5.92671	0.543524	-1.40417
LL0000026324	si:ch73-222f22.2	ENSDARG00000094271.3		0.988418	0	27.6999	10.8255	2.97696	0	0.880163	-1.05514
LL0000034668	XLOC_018981			1028.94	951.375	948.721	783.373	773.018	892.958	0.332479	-0.258022
LL0000022016	pkd1l3		565944	0.988418	0	2.96784	0	0	13.829	1	1.80597
LL0000034386	XLOC_017060			51.3978	41.2787	57.3783	35.4289	43.6621	25.6824	0.674876	-0.518237
LL0000021318	pax1b	ENSDARG00000073814.5	572108	26.6873	33.4161	27.6999	37.3972	18.8541	14.8168	0.896564	-0.304906
LL0000014673	LOC101883142			154.193	132.681	148.392	62.9848	109.155	102.73	0.246639	-0.663262
LL0000021404	pcdh2g12		324865	183.846	122.853	127.617	57.08	93.2781	78.035	0.0760684	-0.927331
LL0000019711	mtmr11	ENSDARG00000069755.6	101882209	799.63	663.407	722.175	709.563	858.357	859.373	0.74501	0.151569
LL0000010366	fitm2	ENSDARG00000034568.6	552928	19.7684	26.5363	43.5284	33.4607	40.6851	62.2305	0.680225	0.602323
LL0000009588	elovl6l	ENSDARG00000038639.6	100150288	15.8147	67.815	30.6677	17.7145	37.7082	33.5847	0.883594	-0.361094
LL0000000330	adgra2	ENSDARG00000076994.5	560700	6118.31	5174.58	5979.22	3866.68	4068.51	4627.77	0.00748425	-0.459264
LL0000016955	LOC108192083		108192083	0	6.87978	20.7749	7.8731	2.97696	5.92671	0.89256	-0.720763
LL0000017624	LOC110439392		110439392	0	17.6909	4.94641	5.90482	0	0	0.773502	-1.93809
LL0000028796	slc4a11	ENSDARG00000075532.7	559346	246.116	152.338	245.342	143.684	157.779	147.18	0.318728	-0.520988
LL0000024262	scaper	ENSDARG00000023104.10	100144551	929.113	1145.97	971.474	1016.61	976.443	935.432	0.921292	-0.0570432
LL0000010882	frzb	ENSDARG00000018383.8	30119	39.5367	61.918	127.617	11.8096	11.9078	45.4381	0.115996	-1.72783
LL0000032088	wnt2	ENSDARG00000041117.4	30127	8.89577	13.7596	4.94641	7.8731	0.99232	2.96335	0.718608	-1.22188
LL0000009851	evla	ENSDARG00000035650.8	58003	248.093	283.054	218.631	254.892	293.727	225.215	0.959844	0.0454841
LL0000029405	srsf4	ENSDARG00000105293.2	321872	1037.84	1440.82	1503.71	1489.98	1444.82	1550.82	0.715221	0.171678
LL0000020403	nlrc5	ENSDARG00000024631.10	100535184	52.3862	11.7939	9.89281	41.3338	31.7543	35.5603	0.816385	0.552798
LL0000001535	atg101	ENSDARG00000043287.9	567680	68.2009	29.4848	80.1318	72.8262	51.6007	18.7679	0.889715	-0.312266
LL0000000860	alcamb	ENSDARG00000058538.5	323919	346.935	421.632	486.726	626.895	721.417	691.449	0.0040811	0.700365
LL0000003513	BX842699.1	ENSDARG00000093557.4	103910404	0	15.7252	9.89281	20.6669	8.93088	28.6458	0.705221	1.18475
LL0000030731	tnfrsf21	ENSDARG00000001807.10	564874	102.796	88.4543	62.3247	156.478	179.61	129.4	0.0734363	0.876271
LL0000011489	gnpnat1	ENSDARG00000039892.7	554143	61.2819	37.3474	32.6463	49.2069	39.6928	27.658	0.93266	-0.171465
LL0000011154	gas5	ENSDARG00000092337.4	101883732	6.91893	0	3.95713	15.7462	0	8.89006	0.841933	1.18016
LL0000001086	anp32e	ENSDARG00000054804.7	406562	1314.6	1057.52	875.514	1635.64	1322.76	1100.39	0.456255	0.321672
LL0000020850	olfcg6	ENSDARG00000098546.2	100149406	39.5367	54.0554	71.2283	45.2703	44.6544	59.2671	0.935159	-0.143695
LL0000026554	si:ch73-45o6.2	ENSDARG00000101507.3	101883461	0	0	0	0	0	422.772	1	22.857
LL0000020801	obscnb	ENSDARG00000022101.10	572412	1237.5	1205.93	716.24	234.225	867.288	1019.39	0.752882	-0.575099
LL0000026594	si:ch73-93k15.5	ENSDARG00000097532.2		15.8147	4.91413	11.8714	2.95241	0	17.7801	0.901629	-0.652757
LL0000004085	CABZ01038376.1	ENSDARG00000105038.2		0	5.89695	9.89281	0	0	0.987785	1	-3.89413
LL0000008917	dia1a	ENSDARG00000012816.7	492795	785.793	1003.46	860.675	697.753	815.687	944.322	0.863027	-0.10864
LL0000024655	sh3tc2	ENSDARG00000089917.4	100535152	2581.75	2062.95	2048.8	736.135	702.563	572.915	2.52405e-21	-1.7344
LL0000030178	tet1	ENSDARG00000075230.6	101883702	1340.3	1399.54	1329.59	1265.6	1370.39	1335.49	0.94305	-0.0351683
LL0000039599	znf407	ENSDARG00000087536.5	101884678	524.85	407.873	375.927	441.878	564.63	485.99	0.750872	0.189627
LL0000000463	agmat	ENSDARG00000059700.6	556522	1.97684	1.96565	1.97856	7.8731	7.93856	10.8656	0.356179	2.17169
LL0000019979	nap1l4a	ENSDARG00000070560.6	337155	216.464	159.218	142.457	425.147	285.788	160.021	0.238138	0.749304
LL0000000858	alas2	ENSDARG00000038643.6	64607	0	3.9313	2.96784	0	12.9002	33.5847	0.431183	2.75186
LL0000033754	XLOC_012761			4.94209	0.982826	8.90353	6.88896	0.99232	15.8046	0.897367	0.676167
LL0000028737	slc38a3b	ENSDARG00000091061.5	101884924	1215.75	1263.91	1392.91	769.595	960.566	1054.95	0.0466194	-0.475573
LL0000031112	trim44	ENSDARG00000051761.6	793099	26.6873	64.8665	59.3569	71.842	81.3703	61.2427	0.676461	0.506867
LL0000001650	atp7a	ENSDARG00000003699.12	564924	850.04	787.243	796.372	755.817	825.611	830.727	0.982201	-0.0128098
LL0000019867	myo10l1	ENSDARG00000074723.6	566674	4.94209	33.4161	64.3033	66.9213	65.4931	80.9984	0.496198	1.05579
LL0000005394	cdr2a	ENSDARG00000035952.7	100148175	136.402	291.899	202.803	150.573	219.303	212.374	0.928687	-0.116344
LL0000031680	uros	ENSDARG00000027491.9	404731	1.97684	14.7424	16.8178	25.5876	6.94624	16.7923	0.874337	0.556714
LL0000039437	znf1056	ENSDARG00000100329.2	101883383	4.94209	9.82826	6.92497	10.8255	11.9078	1.97557	0.96691	0.187442
LL0000022654	prozb	ENSDARG00000076900.2	558106	0	0.982826	0.989281	15.7462	5.95392	1.97557	0.261411	3.58519
LL0000028870	slc7a9	ENSDARG00000005894.13	567117	42.502	62.9008	25.7213	5.90482	43.6621	59.2671	0.9277	-0.268999
LL0000029263	specc1la	ENSDARG00000006719.9	561775	1730.72	1276.69	1348.39	1141.6	1078.65	893.945	0.0641428	-0.484065
LL0000027561	si:dkey-30j10.5	ENSDARG00000093186.2	795145	20.7568	16.708	14.8392	0	2.97696	14.8168	0.588002	-1.55565
LL0000006552	CR391986.1	ENSDARG00000078130.5	100002532	40.5252	6.87978	22.7535	42.3179	22.8234	22.7191	0.911668	0.324895
LL0000024370	sec14l8	ENSDARG00000059729.6	558964	32.6178	19.6565	25.7213	41.3338	17.8618	30.6213	0.93183	0.203883
LL0000008986	dlgap3	ENSDARG00000055459.7	557556	34.5946	25.5535	26.7106	50.191	38.7005	78.035	0.311115	0.942572
LL0000027615	si:dkey-34m19.3	ENSDARG00000078814.6	100005466	94.8882	69.7806	87.0568	119.081	94.2704	110.632	0.654077	0.364197
LL0000035206	XLOC_023549			0	5.89695	4.94641	6.88896	3.96928	13.829	0.78076	1.18675
LL0000021137	otx1	ENSDARG00000094992.2	30500	38.5483	21.6222	33.6356	28.54	40.6851	26.6702	0.98859	0.0317937
LL0000026602	si:dkey-100n23.5	ENSDARG00000086911.4	793886	97.8534	83.5402	116.735	135.811	128.009	99.7663	0.752859	0.286443
LL0000012730	impa2	ENSDARG00000059411.6	553595	67.2125	69.7806	96.9496	81.6834	55.5699	46.4259	0.774712	-0.348821
LL0000031048	trdn	ENSDARG00000041779.9	100038781	64.2472	55.0382	43.5284	38.3814	67.4778	69.1449	0.95371	0.104038
LL0000031664	uqcrc1	ENSDARG00000052304.7	393793	1147.55	972.997	974.442	1221.31	1163.99	1118.17	0.591549	0.178866
LL0000018848	MED9	ENSDARG00000096631.2	100332528	19.7684	32.4332	32.6463	35.4289	22.8234	25.6824	0.994022	-0.0155289
LL0000001084	anp32a	ENSDARG00000006487.9	335907	2379.12	1833.95	1825.22	2946.51	1753.43	1817.52	0.893105	0.110184
LL0000000403	adpgk2	ENSDARG00000062785.6	566398	831.26	1123.37	853.75	741.055	869.273	835.666	0.658404	-0.19936
LL0000005365	cdk5r1b	ENSDARG00000045087.9	436788	42.502	42.2615	44.5177	32.4765	39.6928	57.2915	0.999826	0.0019764
LL0000030010	tbc1d2b	ENSDARG00000061986.7	100330777	378.564	285.019	312.613	351.337	284.796	202.496	0.781229	-0.219091
LL0000002507	BX294178.3	ENSDARG00000117509.1		1.97684	4.91413	22.7535	13.7779	9.9232	6.91449	0.991321	0.0467917
LL0000027533	si:dkey-28e7.3	ENSDARG00000074508.4	100001887	186.811	123.836	142.457	124.985	125.032	102.73	0.615937	-0.361161
LL0000030684	tmprss4b	ENSDARG00000012860.12	327651	9.88418	0.982826	0	0	0	0	1	-4.31681
LL0000012044	her12	ENSDARG00000032963.7	402914	108.726	108.111	85.0782	179.113	185.564	64.206	0.632646	0.506411
LL0000010012	fam167ab	ENSDARG00000023952.10	567341	0	14.7424	18.7963	24.6034	19.8464	19.7557	0.769068	0.936835
LL0000018951	mfsd7		103908782	12.8494	3.9313	2.96784	0	0	2.96335	0.533701	-2.73624
LL0000022265	poln	ENSDARG00000103961.3	566857	0	13.7596	10.8821	20.6669	5.95392	14.8168	0.86048	0.749802
LL0000007071	CR848788.1	ENSDARG00000103037.2		368.68	419.667	383.841	484.196	512.037	499.819	0.210304	0.35192
LL0000003261	BX640536.1	ENSDARG00000094754.2		68.2009	34.3989	0	97.4296	94.2704	19.7557	0.853239	1.04333
LL0000033715	XLOC_012505			7.90735	2.94848	10.8821	0	0	0	1	-5.31704
LL0000023634	rhbdf1b	ENSDARG00000017367.10	563403	172.973	188.703	136.521	170.256	167.702	133.351	0.941616	-0.0800914
LL0000000292	adamts8a	ENSDARG00000007709.10	569618	20.7568	58.9695	41.5498	52.1593	31.7543	31.6091	0.975405	-0.0701372
LL0000012145	hivep3a	ENSDARG00000075928.6	101883448	40.5252	30.4676	17.8071	4.92069	39.6928	31.6091	0.945214	-0.220579
LL0000009589	elovl7a	ENSDARG00000069279.5	334217	66.224	170.029	92.9925	30.5083	55.5699	39.5114	0.0461374	-1.39069
LL0000004412	CABZ01073265.1	ENSDARG00000099425.3	557557	36.5715	32.4332	72.2175	129.906	90.3012	24.6946	0.588266	0.794351
LL0000001559	atn1	ENSDARG00000092067.4	321707	963.708	904.2	864.632	912.295	1014.15	1087.55	0.722675	0.141424
LL0000011905	h2afy2	ENSDARG00000087897.3	558711	1414.43	1247.21	1296.95	1464.4	1162.01	1281.16	0.974874	-0.0186861
LL0000036156	XLOC_031060			85.004	167.08	147.403	182.065	156.787	172.862	0.668921	0.35715
LL0000000236	actr3	ENSDARG00000091138.3	406250	633.576	629.991	580.708	1238.04	930.797	670.706	0.0654628	0.622619
LL0000039118	zgc:194398	ENSDARG00000078250.2	100189615	51.3978	65.8493	48.4748	49.2069	39.6928	10.8656	0.617546	-0.732145
LL0000013649	lhx1a	ENSDARG00000014018.6	30463	8.89577	66.8321	102.885	10.8255	37.7082	38.5236	0.591535	-1.03692
LL0000013512	lamb2l	ENSDARG00000033950.9	553337	271.815	410.821	440.23	374.956	506.083	485.002	0.642723	0.282776
LL0000016872	LOC108190923		108190923	18.7799	16.708	29.6784	9.84137	32.7466	15.8046	0.956867	-0.158559
LL0000039545	znf1169	ENSDARG00000112141.1	100006734	54.363	84.523	104.864	78.731	75.4164	98.7785	0.973001	0.0533274
LL0000018670	march7	ENSDARG00000057772.9	100136862	519.908	505.172	553.008	588.514	629.131	597.61	0.557754	0.201995
LL0000023132	rad51b	ENSDARG00000037046.7	406721	160.124	90.42	98.9281	111.208	130.986	72.1083	0.918475	-0.153019
LL0000019901	myoc	ENSDARG00000021789.7	548602	493.221	441.289	467.93	547.18	685.693	660.828	0.101989	0.433254
LL0000034069	XLOC_014886			15.8147	3.9313	5.93569	3.93655	0	28.6458	0.952845	0.343519
LL0000005616	chn1	ENSDARG00000101735.3	406273	196.695	185.754	194.888	187.97	144.879	142.241	0.657682	-0.281132
LL0000022152	plpp2b	ENSDARG00000028896.9	335485	85.004	68.7978	51.4426	30.5083	25.8003	85.9373	0.738484	-0.528929
LL0000011140	gapvd1	ENSDARG00000090183.3	436693	1953.11	1611.83	1770.81	1086.49	1244.37	1096.44	0.000193491	-0.638629
LL0000036799	XLOC_035578			234.255	304.676	329.431	205.685	282.811	294.36	0.863503	-0.149602
LL0000023905	rpl18a	ENSDARG00000025073.6	394035	5398.74	3155.85	3771.14	6768.9	4186.6	4225.74	0.593928	0.300624
LL0000029112	snx22	ENSDARG00000053204.8	561624	148.263	111.059	115.746	7.8731	6.94624	20.7435	8.91771e-09	-3.39858
LL0000033929	XLOC_014032			1.97684	12.7767	17.8071	4.92069	9.9232	17.7801	0.999826	0.00269862
LL0000012515	ift27	ENSDARG00000099279.3	494045	19.7684	10.8111	6.92497	18.6986	3.96928	3.95114	0.900911	-0.494142
LL0000005090	ccdc6b	ENSDARG00000017595.10	393211	336.062	208.359	338.334	403.496	398.913	314.116	0.560742	0.338989
LL0000018299	lpin2	ENSDARG00000061214.8	558422	486.302	452.1	443.198	451.719	473.337	510.685	0.931827	0.0554514
LL0000031688	usf3	ENSDARG00000077431.5	101884408	612.819	596.575	585.655	639.689	561.653	649.963	0.943121	0.0445439
LL0000012024	HECTD4	ENSDARG00000101079.3	101885095	2310.92	2249.69	2228.85	1720.27	1867.55	1942.97	0.0963743	-0.295818
LL0000011641	gpr55a	ENSDARG00000043447.7	664762	15.8147	0	0	26.5717	9.9232	13.829	0.682192	1.67029
LL0000010453	FO082877.1	ENSDARG00000088225.3	100536950	85.004	97.2997	95.9603	101.366	61.5239	65.1938	0.794791	-0.286767
LL0000020463	nol8	ENSDARG00000044143.9	613021	198.672	113.025	147.403	333.623	207.395	227.191	0.138413	0.742803
LL0000021447	pcolce2a	ENSDARG00000008450.13	100002838	141.344	180.84	100.907	266.701	385.02	179.777	0.0585599	0.974642
LL0000008849	dexi	ENSDARG00000055474.5	445307	0	0.982826	0	0	11.9078	16.7923	0.243504	4.75792
LL0000000186	acot7	ENSDARG00000018653.10	447878	19.7684	23.5878	39.5713	85.6199	44.6544	37.5358	0.338765	1.01711
LL0000004233	CABZ01059099.1	ENSDARG00000067927.5	101882949	548.572	627.043	669.744	682.007	768.056	899.872	0.271036	0.348709
LL0000009841	etv5b	ENSDARG00000044511.7	30452	810.503	590.678	629.183	784.357	962.551	1138.92	0.108493	0.507249
LL0000010364	fitm1	ENSDARG00000056464.5	503747	70.1777	44.2272	38.582	3.93655	27.785	29.6335	0.335043	-1.31841
LL0000006026	col8a1a	ENSDARG00000077403.4	557795	101.807	143.493	191.921	298.194	186.556	177.801	0.352324	0.599738
LL0000020301	nhsl1b	ENSDARG00000042627.6	447799	1345.24	1678.67	1525.47	915.248	1193.76	1011.49	0.0132243	-0.543926
LL0000009883	exosc4	ENSDARG00000103432.2	393712	31.6294	41.2787	33.6356	75.7786	71.4471	27.658	0.556232	0.714893
LL0000008626	cysltr1	ENSDARG00000058246.6	553675	174.95	102.214	54.4105	10.8255	16.8694	9.87785	5.1452e-06	-3.14186
LL0000013639	lhfpl2a	ENSDARG00000009653.10	402962	1101.1	1240.33	1406.76	1042.2	1106.44	1092.49	0.518407	-0.209698
LL0000013776	LO017791.1	ENSDARG00000115189.1	110440145	0	19.6565	7.91425	1.96827	25.8003	13.829	0.91138	0.592936
LL0000022914	ptprt	ENSDARG00000097572.2	567095	47.4441	77.6432	96.9496	27.5558	51.6007	52.3526	0.442021	-0.755773
LL0000022188	plxnc1	ENSDARG00000015278.10	562273	76.1082	73.7119	114.757	2011.58	1176.89	999.638	1.95919e-31	3.98465
LL0000000319	adcy8	ENSDARG00000031783.9	100148976	10.8726	6.87978	11.8714	29.5241	47.6314	53.3404	0.012055	2.13939
LL0000036076	XLOC_030278		101883391	43.4904	66.8321	97.9389	70.8579	93.2781	105.693	0.762023	0.373641
LL0000021483	pdcd5	ENSDARG00000026072.5	394152	156.17	137.596	161.253	193.875	197.472	218.3	0.342299	0.422091
LL0000028605	slc25a27	ENSDARG00000042873.5	393312	0	0.982826	0.989281	25.5876	8.93088	13.829	0.015125	4.61502
LL0000023083	rab5b	ENSDARG00000016059.11	405821	127.506	117.939	131.574	239.145	167.702	225.215	0.0532636	0.745521
LL0000025355	si:ch211-191c10.3	ENSDARG00000097138.2		0	0	0	15.7462	0.99232	11.8534	0.0840946	5.7145
LL0000005693	cib2	ENSDARG00000102820.2	393679	8.89577	23.5878	13.8499	15.7462	25.8003	5.92671	0.991458	0.0347207
LL0000008478	cx52.9	ENSDARG00000086453.3	404625	23.722	27.5191	49.4641	22.6352	96.2551	105.693	0.328502	1.15709
LL0000036405	XLOC_032440			4.94209	6.87978	9.89281	0	0	22.7191	0.992284	0.0652787
LL0000022998	qrich1	ENSDARG00000019797.10	336260	829.283	535.64	701.401	751.881	672.793	540.318	0.93266	-0.0725079
LL0000000879	aldh9a1a.1	ENSDARG00000069100.6	100005587	1366.98	921.89	1176.26	1583.48	1046.9	1023.35	0.9304	0.0764895
LL0000012037	henmt1	ENSDARG00000018871.8	550540	0	12.7767	21.7642	2.95241	21.831	18.7679	0.947651	0.334276
LL0000012423	htra1a	ENSDARG00000032831.6	431766	229.313	185.754	233.47	202.732	209.38	156.07	0.806761	-0.190807
LL0000014973	LOC101884727			29.6526	0	0	70.8579	0	60.2549	0.870353	2.14461
LL0000001276	arhgap24	ENSDARG00000100973.2	100005116	218.44	335.144	191.921	235.209	239.149	153.107	0.789059	-0.248749
LL0000039710	znrf1	ENSDARG00000020475.9	393844	59.3051	32.4332	20.7749	15.7462	33.7389	37.5358	0.867505	-0.370776
LL0000040145	si:ch1073-157b13.1	ENSDARG00000035771.9	100151157	485.313	550.382	550.04	524.545	611.269	650.95	0.709885	0.172168
LL0000012968	itpk1b	ENSDARG00000070583.8	100148744	192.742	168.063	149.381	432.036	303.65	273.616	0.00367592	0.984304
LL0000024604	sgsh	ENSDARG00000032087.7	563849	140.355	172.977	158.285	74.7944	165.718	132.363	0.727742	-0.339071
LL0000009938	fabp2	ENSDARG00000006427.6	30708	18.7799	0	0	0	0	0	1	-5.10604
LL0000039125	zgc:194627	ENSDARG00000102594.2	799208	17.7915	44.2272	26.7106	19.6827	16.8694	15.8046	0.636142	-0.761138
LL0000010954	ftr58	ENSDARG00000071238.5	557916	16.8031	3.9313	9.89281	2.95241	0.99232	10.8656	0.779982	-1.04788
LL0000039755	LOC110438473		110438473	72.1545	120.888	89.0353	63.9689	114.117	98.7785	0.986529	-0.0270954
LL0000029538	stim1b	ENSDARG00000061560.7	100005700	281.699	202.462	245.342	412.354	345.328	362.517	0.0493828	0.618848
LL0000001467	asb7	ENSDARG00000006494.10	405798	257.977	269.294	284.913	271.622	281.819	314.116	0.898434	0.0951489
LL0000017945	LOC110439961		110439961	6.91893	21.6222	0	12.7938	11.9078	11.8534	0.944105	0.356687
LL0000011486	gnpat	ENSDARG00000074401.4	572335	165.066	200.496	167.189	194.859	206.403	210.398	0.772406	0.199203
LL0000010399	flot1a	ENSDARG00000001710.13	561345	657.298	507.138	620.279	444.83	349.297	367.456	0.0205636	-0.619533
LL0000011376	glis1a	ENSDARG00000068580.5	101883139	53.3746	47.1756	34.6249	14.7621	33.7389	18.7679	0.350941	-1.00715
LL0000010597	foxi3b	ENSDARG00000009550.6	387258	4.94209	3.9313	15.8285	0	1.98464	10.8656	0.856085	-0.942761
LL0000021246	pank1b	ENSDARG00000010098.9	565059	403.275	348.903	360.098	455.656	343.343	263.739	0.946894	-0.0656843
LL0000018274	loxhd1a	ENSDARG00000094738.2	564819	0	4.91413	0.989281	0	13.8925	2.96335	0.822987	1.51267
LL0000027569	si:dkey-31e10.5	ENSDARG00000070502.5	100536909	0	11.7939	2.96784	7.8731	0	0	0.921554	-0.906529
LL0000005795	clec3bb	ENSDARG00000099500.2	100537161	10.8726	11.7939	7.91425	1.96827	7.93856	5.92671	0.756353	-0.950193
LL0000004511	CABZ01080074.1	ENSDARG00000076371.4	556551	106.749	122.853	150.371	75.7786	93.2781	176.814	0.930006	-0.135669
LL0000002911	BX511100.5	ENSDARG00000095948.4		8.89577	23.5878	2.96784	5.90482	3.96928	8.89006	0.782456	-0.918036
LL0000000972	and1	ENSDARG00000088514.4	794315	3014.68	4138.68	2288.21	3900.14	4843.52	2614.67	0.691054	0.266642
LL0000029408	srsf6a	ENSDARG00000013729.8	406775	999.291	894.371	805.275	1380.74	895.073	984.822	0.549344	0.272789
LL0000013014	jakmip3	ENSDARG00000100708.2	100334213	21.7452	25.5535	20.7749	13.7779	3.96928	9.87785	0.403589	-1.30067
LL0000026298	si:ch73-1a9.4	ENSDARG00000055339.7	557349	167.043	120.888	132.564	189.938	202.433	314.116	0.109386	0.748614
LL0000015733	LOC103909905		103909905	0	0	0	11.8096	0	2.96335	1	4.76187
LL0000030170	tert	ENSDARG00000042637.10	796551	445.777	443.254	385.82	381.845	392.959	555.135	0.944589	0.0610218
LL0000011840	gtf2h4	ENSDARG00000036071.8	334839	551.537	552.348	509.48	436.957	441.583	447.467	0.332275	-0.282998
LL0000012165	hmga1a	ENSDARG00000028335.9	406447	18746.3	13119.7	14743.3	21856.7	14872.9	15242.5	0.783707	0.157121
LL0000009678	eogt	ENSDARG00000022853.9	798087	759.105	576.919	462.984	1030.39	782.941	640.085	0.324375	0.447607
LL0000009487	eif2b3	ENSDARG00000018106.8	394049	153.205	108.111	111.789	180.097	190.526	144.217	0.426725	0.464568
LL0000017921	LOC110439933		110439933	0	0	0	9.84137	0	0	1	4.17579
LL0000022039	pkp1b	ENSDARG00000052705.6	797838	102.796	201.479	132.564	30.5083	75.4164	60.2549	0.0232053	-1.3946
LL0000026044	si:ch211-39i22.1		100333059	641.484	921.89	949.71	716.452	892.096	948.274	0.975797	0.0248698
LL0000025602	si:ch211-217a12.1	ENSDARG00000055642.7	100148522	31.6294	2.94848	5.93569	8.85724	5.95392	14.8168	0.915079	-0.451205
LL0000011912	hacd1	ENSDARG00000103744.2	553326	53.3746	42.2615	29.6784	14.7621	34.7312	7.90228	0.413809	-1.12687
LL0000018369	lrrc3cb	ENSDARG00000076186.5	100144399	34.5946	11.7939	25.7213	4.92069	10.9155	15.8046	0.504985	-1.18847
LL0000000731	AL929457.1	ENSDARG00000095483.3		0.988418	2.94848	18.7963	15.7462	6.94624	35.5603	0.643021	1.35787
LL0000013937	LOC100004978		100004978	0	2.94848	11.8714	0	22.8234	17.7801	0.771739	1.45411
LL0000001034	ankrd33ab	ENSDARG00000002508.9	569518	0	11.7939	0.989281	3.93655	3.96928	0.987785	1	-0.523904
LL0000039564	znf148	ENSDARG00000055106.8	560300	488.279	491.413	474.855	481.243	450.513	469.198	0.929882	-0.0541489
LL0000000845	AL954698.1	ENSDARG00000098202.2		0.988418	5.89695	0	7.8731	4.9616	4.93892	0.780292	1.36723
LL0000013977	LOC100007738		100007738	5.93051	8.84543	15.8285	3.93655	4.9616	0.987785	0.54604	-1.63043
LL0000022977	pygo1	ENSDARG00000098687.3	797729	26.6873	13.7596	14.8392	20.6669	0	5.92671	0.761484	-1.05531
LL0000020000	nat8l	ENSDARG00000077256.6	564754	328.155	378.388	459.027	496.005	574.554	726.022	0.0524817	0.624219
LL0000015638	LOC103909472		103909472	270.827	319.418	217.642	133.843	240.142	231.142	0.532951	-0.417027
LL0000007349	cry1aa	ENSDARG00000045768.9	100003956	61.2819	64.8665	103.875	89.5565	89.3088	107.669	0.771739	0.317005
LL0000008105	CU633479.2	ENSDARG00000103837.2	103909788	10.8726	12.7767	18.7963	2.95241	3.96928	9.87785	0.545178	-1.3372
LL0000009113	dnmt3aa	ENSDARG00000005394.12	553187	747.244	730.239	805.275	1352.2	1133.23	935.432	0.0142179	0.583604
LL0000001805	baz1b	ENSDARG00000102832.2	571727	4280.84	3841.87	3765.21	4617.57	4375.14	4196.11	0.572022	0.149825
LL0000036478	XLOC_032976			0	7.8626	17.8071	10.8255	5.95392	0.987785	0.929084	-0.530653
LL0000013550	layna	ENSDARG00000035169.6	564995	0	5.89695	1.97856	1.96827	2.97696	11.8534	0.847103	1.09228
LL0000021489	pde10a	ENSDARG00000003449.10	394077	254.024	305.659	301.731	373.972	437.613	308.189	0.36994	0.378387
LL0000013498	lacc1	ENSDARG00000076914.6	100005054	28.6641	10.8111	5.93569	13.7779	14.8848	5.92671	0.913136	-0.39269
LL0000040467	LOC110439538		110439538	7.90735	33.4161	5.93569	0	27.785	33.5847	0.939312	0.376644
LL0000011420	GMEB2	ENSDARG00000093240.2	568906	180.881	138.578	151.36	174.192	165.718	172.862	0.895815	0.1232
LL0000028531	slc18a3a	ENSDARG00000006356.6	559347	0	11.7939	16.8178	3.93655	14.8848	14.8168	0.964216	0.23333
LL0000002213	BX005108.3	ENSDARG00000095965.2		1.97684	0	0.989281	23.6193	0	0	0.629529	2.99408
LL0000018383	lrrc58a	ENSDARG00000076773.4	100000656	36.5715	6.87978	31.657	24.6034	3.96928	28.6458	0.91178	-0.392159
LL0000004813	calhm5.1	ENSDARG00000074947.3	100037308	19.7684	22.605	15.8285	1.96827	29.7696	29.6335	0.983935	0.0762547
LL0000021007	or124-3	ENSDARG00000093603.3	100150837	9.88418	2.94848	0	0	1.98464	0.987785	1	-2.11105
LL0000024661	sharpin	ENSDARG00000076995.5	793673	167.043	163.149	154.328	160.414	117.094	153.107	0.848572	-0.17008
LL0000011265	gfi1aa	ENSDARG00000020746.10	553814	0.988418	0.982826	10.8821	124.001	157.779	54.3282	1.23933e-06	4.70981
LL0000011444	gnai2b	ENSDARG00000017294.11	327650	166.054	171.012	207.749	348.385	316.55	187.679	0.185055	0.646154
LL0000028855	slc7a10a	ENSDARG00000008100.11	567420	76.1082	57.9867	53.4212	67.9055	96.2551	97.7907	0.581525	0.482235
LL0000019418	mmp9	ENSDARG00000042816.5	406397	235.244	281.088	326.463	3539.94	2538.36	1956.8	3.39997e-35	3.25308
LL0000023913	rpl26	ENSDARG00000102317.2	406387	5143.73	3147.99	3120.19	5769.01	3553.5	3570.84	0.823589	0.176095
LL0000009314	dynll2b	ENSDARG00000005172.5	572690	32.6178	77.6432	58.3676	78.731	63.5085	56.3037	0.888878	0.23553
LL0000021837	pimr130	ENSDARG00000052758.7	564718	16.8031	4.91413	0.989281	0	0	2.96335	0.508573	-2.93762
LL0000018013	LOC110440066		110440066	0.988418	1.96565	0	0	0	14.8168	1	2.32587
LL0000021813	pim2	ENSDARG00000059001.5	58054	113.668	219.17	240.395	228.32	210.372	313.128	0.633608	0.391255
LL0000007446	csnk1g2b	ENSDARG00000034056.9	561724	505.082	540.554	440.23	652.483	543.792	510.685	0.677737	0.200126
LL0000038745	zgc:153713		751630	51.3978	80.5917	83.0996	139.747	90.3012	80.0106	0.557329	0.527655
LL0000030328	timm8b	ENSDARG00000055708.4	793663	31.6294	32.4332	31.657	59.0482	45.6467	35.5603	0.644623	0.551227
LL0000014566	LOC101882570		101882570	0	3.9313	4.94641	7.8731	20.8387	20.7435	0.239337	2.47758
LL0000014071	LOC100330246		100330246	0	1.96565	14.8392	1.96827	7.93856	5.92671	0.989605	-0.0858813
LL0000038668	zgc:136439	ENSDARG00000009267.8	678627	42.502	44.2272	53.4212	84.6358	45.6467	20.7435	0.962412	0.107957
LL0000022677	prr11	ENSDARG00000087393.4	567366	47.4441	27.5191	41.5498	40.3496	53.5853	43.4625	0.89256	0.237913
LL0000027570	si:dkey-31f5.11	ENSDARG00000099812.2	335883	47.4441	83.5402	116.735	250.955	265.942	257.812	7.79086e-05	1.64496
LL0000013411	klhl4	ENSDARG00000016531.12	559349	828.295	934.667	960.592	281.463	356.243	374.371	8.11354e-13	-1.42822
LL0000023779	rnf150b	ENSDARG00000009524.9	792211	388.448	457.014	438.252	442.862	446.544	443.515	0.935635	0.0542468
LL0000028892	slco1c1	ENSDARG00000016749.11	562772	216.464	165.115	172.135	237.177	208.387	330.908	0.341222	0.487841
LL0000018563	man2a1	ENSDARG00000102200.2	560219	2172.54	2304.73	1922.17	981.185	1233.45	966.054	1.19831e-08	-1.00864
LL0000038775	zgc:154093	ENSDARG00000055897.6	777623	328.155	189.685	191.921	211.59	132.971	166.936	0.493768	-0.472513
LL0000022720	prxl2c	ENSDARG00000075299.4	100332791	48.4325	34.3989	14.8392	7.8731	6.94624	17.7801	0.243742	-1.58304
LL0000023786	rnf167	ENSDARG00000017636.11	101055497	496.186	445.22	506.512	428.1	478.298	504.758	0.956753	-0.0370992
LL0000019362	mlana		110438214	0	3.9313	11.8714	0	0	2.96335	1	-2.41469
LL0000038544	zgc:112185	ENSDARG00000038556.4	541326	40.5252	22.605	27.6999	31.4924	18.8541	42.4748	0.989605	0.0314832
LL0000004492	CABZ01079267.1	ENSDARG00000110019.1		12.8494	14.7424	20.7749	11.8096	9.9232	12.8412	0.849242	-0.4842
LL0000000541	akap6	ENSDARG00000077295.6	100002625	139.367	152.338	153.339	70.8579	185.564	197.557	0.986085	0.0285924
LL0000031835	vegfbb	ENSDARG00000092480.2	100535766	0.988418	6.87978	9.89281	21.651	15.8771	26.6702	0.282241	1.85383
LL0000024435	sema4ba	ENSDARG00000074414.6	572261	573.283	505.172	435.284	332.638	439.598	499.819	0.649075	-0.250988
LL0000001705	axin2	ENSDARG00000100149.3	58080	3029.5	2724.39	2886.72	2545.96	2583.01	2362.78	0.338978	-0.205827
LL0000018944	mfsd4aa	ENSDARG00000023768.9	393503	0	6.87978	29.6784	1.96827	5.95392	16.7923	0.920932	-0.564792
LL0000013870	LO018564.1	ENSDARG00000112944.1	100330200	1.97684	3.9313	8.90353	219.463	169.687	95.8151	4.08288e-14	5.03359
LL0000030617	tmem42a	ENSDARG00000102717.2	100329298	0	5.89695	11.8714	17.7145	9.9232	25.6824	0.553025	1.5855
LL0000040129	rimbp2	ENSDARG00000093752.2	563166	14.8263	61.918	41.5498	23.6193	45.6467	73.0961	0.916669	0.267015
LL0000013073	katnal1	ENSDARG00000099156.2	492790	7.90735	25.5535	67.2711	41.3338	63.5085	72.1083	0.6478	0.812879
LL0000001708	azin1a	ENSDARG00000052789.7	550230	336.062	397.062	462.984	272.606	328.458	436.601	0.779978	-0.205019
LL0000021682	phax	ENSDARG00000044298.6	445490	94.8882	98.2826	110.8	171.24	116.101	132.363	0.456791	0.465546
LL0000014150	LOC100332698		100332698	48.4325	125.802	66.2819	31.4924	88.3165	48.4015	0.734806	-0.516127
LL0000029535	steap4	ENSDARG00000055901.7	550429	53.3746	56.0211	57.3783	26.5717	41.6775	20.7435	0.311781	-0.906336
LL0000005264	cd9b	ENSDARG00000016691.9	406737	102.796	133.664	91.0139	32.4765	27.785	43.4625	0.000844559	-1.65861
LL0000034312	XLOC_016430			65.2356	42.2615	47.4855	17.7145	66.4855	82.9739	0.963365	0.109165
LL0000040201	hist1h2a10	ENSDARG00000112840.1	100332885	676.078	348.903	249.299	650.515	297.696	216.325	0.939312	-0.129889
LL0000003984	CABZ01002809.1	ENSDARG00000105078.1	100334312	71.1661	13.7596	1.97856	23.6193	25.8003	19.7557	0.932987	-0.32913
LL0000002662	BX323820.1	ENSDARG00000111326.1	561298	0	5.89695	7.91425	0	9.9232	5.92671	0.978658	0.19831
LL0000031727	usp43b	ENSDARG00000088072.3	100149276	140.355	164.132	141.467	78.731	92.2858	67.1694	0.0310075	-0.904907
LL0000025421	si:ch211-197g15.6	ENSDARG00000094747.3	571364	0	3.9313	1.97856	7.8731	9.9232	5.92671	0.546873	2.00424
LL0000038458	zgc:101679	ENSDARG00000025518.11	450058	46.4557	27.5191	29.6784	53.1434	74.424	40.4992	0.528214	0.697263
LL0000017985	LOC110440017		110440017	0	10.8111	0.989281	0.984137	3.96928	6.91449	0.999826	0.00757017
LL0000001981	bola3	ENSDARG00000098130.2	445131	15.8147	23.5878	31.657	39.3655	32.7466	35.5603	0.681708	0.599622
LL0000022626	prmt7	ENSDARG00000051902.6	393475	131.46	75.6776	89.0353	173.208	153.81	184.716	0.107414	0.789055
LL0000029768	synrg	ENSDARG00000073926.5	555257	476.418	640.802	591.59	578.673	619.208	679.596	0.815425	0.135773
LL0000005800	clic4	ENSDARG00000022995.7	368255	2714.2	1717	1845.01	1995.83	1578.78	1695.04	0.592596	-0.252168
LL0000016195	LOC103911727		103911727	0	16.708	13.8499	4.92069	0	15.8046	0.932385	-0.560112
LL0000010219	fbxo42	ENSDARG00000087545.2	335459	144.309	120.888	110.8	135.811	98.2397	125.449	0.956858	-0.0646422
LL0000019413	mmp24	ENSDARG00000018896.10	571143	41.5136	64.8665	117.724	36.4131	69.4624	71.1205	0.841485	-0.340505
LL0000020205	neo1b	ENSDARG00000102069.2	100332721	1547.86	1696.36	1876.67	1667.13	2141.43	2227.46	0.492533	0.237192
LL0000005702	cilp2	ENSDARG00000013687.11	557778	29.6526	30.4676	30.6677	13.7779	33.7389	40.4992	0.985993	-0.0448947
LL0000005566	chchd6a	ENSDARG00000003206.12	449542	74.1314	50.1241	60.3462	84.6358	102.209	68.1572	0.610106	0.466116
LL0000023305	rbm5	ENSDARG00000098280.2	324302	1842.41	2282.12	2714.59	1738.97	2146.39	2623.56	0.926739	-0.0713973
LL0000006339	CR376779.1	ENSDARG00000109760.1		4.94209	14.7424	8.90353	2.95241	7.93856	15.8046	0.981939	-0.099135
LL0000031738	usp54b	ENSDARG00000077749.6	100535699	56.3398	67.815	66.2819	87.5882	64.5008	70.1327	0.859818	0.222747
LL0000007211	CR932999.1	ENSDARG00000117461.1		5.93051	60.9352	34.6249	5.90482	25.8003	14.8168	0.608428	-1.12573
LL0000008835	depdc5	ENSDARG00000078105.5	562995	1273.08	1297.33	1147.57	1027.44	1051.86	1230.78	0.641157	-0.167662
LL0000019926	mzt2b	ENSDARG00000057928.7	445174	129.483	107.128	123.66	180.097	116.101	109.644	0.881954	0.171961
LL0000000246	acvr2ab	ENSDARG00000104700.3	100331014	943.94	1037.86	1134.71	812.897	1041.94	1295.97	0.984203	0.0157796
LL0000014205	LOC100334202			0	0	0	0	26.7927	0	0.349507	5.62043
LL0000030340	tiprl	ENSDARG00000032353.6	393636	60.2935	110.076	149.381	153.525	148.848	133.351	0.627775	0.446476
LL0000020869	olfml2bb	ENSDARG00000021480.10	567907	15.8147	16.708	22.7535	69.8737	43.6621	37.5358	0.0813954	1.45068
LL0000038342	zc3h11a	ENSDARG00000009754.11	324551	1441.11	1755.33	1998.35	1775.38	1917.16	2218.57	0.665212	0.186362
LL0000035480	XLOC_025821			97.8534	23.5878	25.7213	43.302	22.8234	56.3037	0.920932	-0.265313
LL0000002167	BX004991.1	ENSDARG00000096896.2		0	0.982826	4.94641	10.8255	8.93088	31.6091	0.152203	3.11559
LL0000012461	id2b	ENSDARG00000029544.6	321364	0	14.7424	15.8285	15.7462	2.97696	8.89006	0.978413	-0.146643
LL0000038972	zgc:172120	ENSDARG00000069199.5	799440	0.988418	16.708	5.93569	5.90482	5.95392	0	0.852805	-0.995054
LL0000003667	BX927122.1	ENSDARG00000100571.2		266.873	54.0554	25.7213	177.145	85.3396	78.035	0.992284	-0.0256759
LL0000017863	LOC110439840		110439840	61.2819	49.1413	53.4212	78.731	52.593	53.3404	0.913105	0.172728
LL0000022730	psip1b	ENSDARG00000077405.5	407619	263.908	403.941	565.869	379.877	638.062	542.294	0.661692	0.338729
LL0000038853	zgc:162898	ENSDARG00000111588.1	100003490	0	5.89695	0	7.8731	1.98464	10.8656	0.733359	1.81224
LL0000005478	cept1b	ENSDARG00000021177.11	570720	131.46	140.544	142.457	148.605	113.125	108.656	0.869934	-0.162135
LL0000020124	ndufab1a	ENSDARG00000058463.6	573619	170.008	89.4371	95.9603	249.971	115.109	139.278	0.602314	0.5051
LL0000001538	ATG14	ENSDARG00000002670.12	407686	143.321	238.827	221.599	225.367	225.257	263.739	0.758727	0.242674
LL0000009256	dtwd2	ENSDARG00000101873.2	100537837	67.2125	56.0211	69.2497	52.1593	27.785	54.3282	0.641829	-0.519361
LL0000018798	MDFIC	ENSDARG00000074223.6	100150512	318.271	364.628	476.834	277.527	246.095	337.822	0.343365	-0.428926
LL0000031513	ubl7a	ENSDARG00000024229.8	550462	62.2704	32.4332	21.7642	11.8096	9.9232	14.8168	0.118745	-1.6719
LL0000000094	abhd2b	ENSDARG00000045804.7	559290	0.988418	3.9313	0.989281	17.7145	4.9616	7.90228	0.350382	2.37075
LL0000026712	si:dkey-121n8.8		569635	0	0	0	0	9.9232	20.7435	0.148379	5.81535
LL0000024464	sepsecs	ENSDARG00000033861.7	393123	93.8997	77.6432	92.9925	102.35	67.4778	40.4992	0.804144	-0.330701
LL0000000529	ak7a	ENSDARG00000019001.12	402854	13.8379	21.6222	10.8821	9.84137	10.9155	10.8656	0.829504	-0.551585
LL0000029049	snapc4	ENSDARG00000067673.7	561241	231.29	217.204	241.385	271.622	230.218	372.395	0.547741	0.34172
LL0000011702	grem1a	ENSDARG00000090720.3	100332300	0	0	0	0	8.93088	0	1	4.03537
LL0000038789	zgc:158320	ENSDARG00000099373.2	780837	6.91893	4.91413	16.8178	32.4765	7.93856	26.6702	0.547741	1.22787
LL0000009774	erfl3	ENSDARG00000062801.9	565909	2288.19	2297.85	2200.16	2078.5	2154.33	2068.42	0.718433	-0.106973
LL0000019538	mrpl19	ENSDARG00000011885.8	445150	148.263	79.6089	86.0675	97.4296	81.3703	98.7785	0.899309	-0.177496
LL0000026830	si:dkey-163m14.6	ENSDARG00000090041.3	794278	0	16.708	0	32.4765	26.7927	25.6824	0.386048	2.34535
LL0000001849	bcl6ab	ENSDARG00000069295.6	100001936	229.313	294.848	281.945	276.543	386.013	325.969	0.57964	0.294231
LL0000029092	snupn	ENSDARG00000008395.8	324743	77.0966	139.561	148.392	142.7	140.91	115.571	0.922989	0.128917
LL0000010630	foxred1	ENSDARG00000099705.2	556387	143.321	109.094	91.0139	120.065	113.125	119.522	0.974913	0.0384993
LL0000007660	CT583728.26	ENSDARG00000117174.1		1638.8	333.178	890.353	658.388	246.095	968.029	0.804907	-0.612202
LL0000005912	cnot2	ENSDARG00000061802.7	100037372	621.715	650.631	840.889	758.77	727.371	754.668	0.898002	0.0845898
LL0000013110	kcnc3b	ENSDARG00000098816.2	564371	0	4.91413	9.89281	5.90482	8.93088	20.7435	0.731515	1.2648
LL0000004004	CABZ01012382.1	ENSDARG00000115450.1	100329790	0	4.91413	13.8499	14.7621	14.8848	22.7191	0.594698	1.48083
LL0000006349	CR376861.1	ENSDARG00000114314.1		25.6989	7.8626	7.91425	0	9.9232	0.987785	0.554533	-1.92741
LL0000037053	XLOC_037785			0	4.91413	0	0	3.96928	19.7557	0.717311	2.27044
LL0000010972	ftr83	ENSDARG00000025403.10	565972	327.166	388.216	247.32	112.192	203.426	145.204	0.00760959	-1.06303
LL0000015299	LOC101886340		101886340	22.7336	57.0039	21.7642	8.85724	8.93088	13.829	0.1571	-1.68288
LL0000000070	abcg2a	ENSDARG00000100075.2	735312	1118.89	641.785	974.442	819.786	625.162	647.987	0.397354	-0.386032
LL0000039193	zgc:65811		393524	0	5.89695	0	51.1751	5.95392	8.89006	0.186118	3.48338
LL0000023587	rgcc	ENSDARG00000035810.7	431737	209.545	185.754	128.607	38.3814	27.785	83.9617	0.00195542	-1.80305
LL0000028276	si:dkeyp-80d11.14	ENSDARG00000101071.2		0	3.9313	3.95713	0	1.98464	10.8656	1	0.703808
LL0000025954	si:ch211-274p24.2	ENSDARG00000095185.2	557138	0	12.7767	0.989281	6.88896	4.9616	1.97557	0.999826	0.00583984
LL0000031120	trim59	ENSDARG00000079238.4	100006971	288.618	190.668	221.599	232.256	176.633	270.653	0.96751	-0.0445359
LL0000031355	tuba8l4	ENSDARG00000006260.13	393154	8217.71	5166.71	5466.77	7896.72	5218.61	5082.15	0.954807	-0.0509109
LL0000000844	AL954696.2	ENSDARG00000117348.1		8.89577	3.9313	20.7749	0	12.9002	2.96335	0.805412	-1.08332
LL0000008542	cyp11c1	ENSDARG00000042014.7	791124	41.5136	40.2959	64.3033	25.5876	70.4548	101.742	0.803119	0.436817
LL0000004770	cacng3a	ENSDARG00000058460.6	567438	32.6178	25.5535	29.6784	27.5558	14.8848	8.89006	0.644937	-0.774944
LL0000014846	LOC101884098		101884098	37.5599	70.7634	56.389	65.9372	31.7543	38.5236	0.87964	-0.273967
LL0000040276	zgc:113984	ENSDARG00000115644.1	573997	1551.82	1053.59	1057.54	1143.57	818.664	874.19	0.365535	-0.368904
LL0000005348	cdk11b	ENSDARG00000102546.2	494103	542.642	597.558	601.483	809.945	602.338	616.378	0.62165	0.220078
LL0000039058	zgc:174863	ENSDARG00000099476.2	100136852	163.089	213.273	207.749	302.13	258.996	252.873	0.2312	0.478783
LL0000038155	XLOC_044110			25.6989	26.5363	14.8392	19.6827	18.8541	48.4015	0.874987	0.374166
LL0000009820	esyt1b	ENSDARG00000014239.9	571083	1380.82	1126.32	1040.72	794.199	930.797	736.888	0.0312836	-0.527204
LL0000009881	exosc2	ENSDARG00000028688.8	550234	56.3398	51.1069	39.5713	75.7786	48.6237	37.5358	0.940102	0.139533
LL0000032576	XLOC_003075			10.8726	49.1413	18.7963	18.6986	32.7466	17.7801	0.949024	-0.187443
LL0000009110	dnm3a	ENSDARG00000032238.9	557996	63.2588	87.4715	63.314	90.5406	21.831	49.3892	0.816385	-0.403877
LL0000008887	dhrs13a.3	ENSDARG00000041137.7	492783	359.784	221.136	273.042	224.383	161.748	279.543	0.613737	-0.359278
LL0000021944	pimr68	ENSDARG00000038955.8	792721	2.96526	3.9313	3.95713	0	8.93088	0.987785	1	-0.130704
LL0000029391	srpx2	ENSDARG00000034559.8	100332730	0.988418	31.4504	10.8821	10.8255	31.7543	17.7801	0.904702	0.47812
LL0000013575	ldb2a	ENSDARG00000019579.12	30577	1870.09	1554.83	1648.14	1439.79	1174.91	1194.23	0.062373	-0.413443
LL0000014498	LOC101882251		101882251	13.8379	13.7596	6.92497	14.7621	27.785	29.6335	0.509533	1.06382
LL0000004013	CABZ01015815.2	ENSDARG00000105672.2		0	17.6909	20.7749	24.6034	17.8618	21.7313	0.834904	0.738886
LL0000011271	gfod2	ENSDARG00000061145.5	777639	80.0619	51.1069	83.0996	47.2386	57.5546	60.2549	0.74219	-0.376485
LL0000022611	prl	ENSDARG00000037946.4	791526	0	0	5.93569	0	0.99232	9.87785	1	0.873228
LL0000040532	LOC100534908		100534908	100.819	55.0382	50.4534	76.7627	60.5315	63.2182	0.981726	-0.0410248
LL0000022513	prcp	ENSDARG00000037883.7	436967	3798.49	2867.89	2374.28	549.149	556.692	395.114	7.44726e-28	-2.59055
LL0000018830	med18	ENSDARG00000041237.4	393306	6.91893	10.8111	4.94641	15.7462	2.97696	13.829	0.892572	0.521633
LL0000037773	XLOC_042919			13.8379	66.8321	28.6892	26.5717	58.5469	56.3037	0.875103	0.370656
LL0000024588	sgf29	ENSDARG00000002339.11	449813	235.244	138.578	169.167	126.954	105.186	149.156	0.416476	-0.509926
LL0000024444	sema5bb	ENSDARG00000075648.5	100000009	74.1314	154.304	222.588	167.303	176.633	372.395	0.479755	0.667433
LL0000005170	ccndbp1	ENSDARG00000039328.6	553373	98.8418	92.3856	95.9603	182.065	127.017	114.583	0.344714	0.561018
LL0000006931	CR788311.1	ENSDARG00000094757.2		20.7568	33.4161	89.0353	37.3972	121.063	54.3282	0.766538	0.571276
LL0000031494	ube2ql1	ENSDARG00000079276.5	557472	149.251	132.681	242.374	110.223	172.664	198.545	0.928434	-0.123076
LL0000009740	eps8l1a	ENSDARG00000057984.6	503735	46.4557	59.9524	17.8071	3.93655	23.8157	17.7801	0.326819	-1.44831
LL0000012015	heatr3	ENSDARG00000036076.6	393863	195.707	113.025	117.724	193.875	197.472	153.107	0.662892	0.352452
LL0000038438	zgc:100846	ENSDARG00000011837.9	402895	90.9345	56.0211	62.3247	76.7627	93.2781	88.9006	0.781229	0.307215
LL0000024791	si:ch1073-188e1.1	ENSDARG00000074085.5	100006656	3.95367	16.708	6.92497	0	0	0	0.0614639	-5.66104
LL0000030879	tpma	ENSDARG00000033683.9	30324	5458.05	3362.25	1511.62	985.121	2082.88	1582.43	0.241156	-1.15167
LL0000028938	smad7	ENSDARG00000016858.8	326282	577.236	534.657	530.255	560.958	645.008	715.156	0.553644	0.226352
LL0000020509	npbwr2a	ENSDARG00000079423.6	556532	0	15.7252	0.989281	5.90482	2.97696	8.89006	0.989548	0.088107
LL0000029449	ssuh2.3	ENSDARG00000076614.5	797780	38.5483	41.2787	17.8071	297.209	249.072	171.875	2.96138e-10	2.87864
LL0000031109	trim37	ENSDARG00000076473.5	324237	316.294	237.844	227.535	265.717	233.195	234.105	0.91895	-0.0926727
LL0000012169	hmgb1b	ENSDARG00000030479.7	795095	898.472	703.703	761.747	1015.63	613.254	570.94	0.91277	-0.103754
LL0000017112	LOC110437988		110437988	0	11.7939	8.90353	7.8731	25.8003	24.6946	0.583196	1.49537
LL0000021636	pfkfb4b	ENSDARG00000029075.9	386663	410.194	317.453	533.223	239.145	263.957	606.5	0.889715	-0.184355
LL0000030141	tefm	ENSDARG00000100548.2	566236	129.483	94.3513	97.9389	126.954	125.032	107.669	0.883419	0.160611
LL0000010626	foxp4	ENSDARG00000076120.4	557245	7437.85	7456.7	8104.19	6839.75	6854.95	6736.69	0.380818	-0.170765
LL0000023322	rbp4l	ENSDARG00000044684.6	335651	7.90735	18.6737	6.92497	12.7938	10.9155	13.829	0.961993	0.16367
LL0000022830	ptges3b	ENSDARG00000089626.3	415227	501.128	328.264	326.463	871.946	536.845	470.186	0.114242	0.701029
LL0000007579	CT573204.1	ENSDARG00000093518.2	100320750	30.641	26.5363	24.732	51.1751	30.7619	37.5358	0.690995	0.544724
LL0000018691	marveld3	ENSDARG00000099654.2	393501	10.8726	6.87978	1.97856	0	1.98464	4.93892	0.740722	-1.51122
LL0000027110	si:dkey-211i20.2	ENSDARG00000103003.2		0	5.89695	2.96784	7.8731	25.8003	2.96335	0.523493	2.04637
LL0000023967	rps15	ENSDARG00000070849.4	337148	1760.37	1149.91	1190.11	2110.97	1164.98	1504.4	0.755439	0.221382
LL0000019559	mrpl41	ENSDARG00000002264.8	553805	13.8379	19.6565	16.8178	30.5083	6.94624	9.87785	0.979803	-0.0877783
LL0000000514	aimp1	ENSDARG00000060036.5	562232	154.193	80.5917	86.0675	163.367	98.2397	98.7785	0.913105	0.167753
LL0000024644	sh3glb1b	ENSDARG00000010956.12	334911	182.857	133.664	179.06	256.86	236.172	211.386	0.242988	0.507396
LL0000038613	zgc:113377	ENSDARG00000053165.6	568840	69.1893	67.815	48.4748	29.5241	72.4394	40.4992	0.801551	-0.38092
LL0000028947	smarcad1a	ENSDARG00000014041.11	557875	785.793	835.402	737.015	858.168	939.727	911.726	0.516592	0.200369
LL0000030158	tent5ab	ENSDARG00000054641.6	571146	269.838	223.101	205.771	231.272	88.3165	63.2182	0.281825	-0.867961
LL0000014687	LOC101883215		101883215	36.5715	39.313	37.5927	71.842	44.6544	25.6824	0.859471	0.325398
LL0000040415	LOC101883052		101883052	0	9.82826	17.8071	0	9.9232	0	0.83085	-1.47818
LL0000019797	mybl2a	ENSDARG00000095241.3	100005189	261.931	226.05	185.985	275.558	217.318	223.239	0.927001	0.0875543
LL0000008978	dlg4a	ENSDARG00000041926.7	100000823	1.97684	28.5019	10.8821	4.92069	11.9078	16.7923	0.945214	-0.299279
LL0000022788	psmg3	ENSDARG00000098391.2	436802	131.46	101.231	91.0139	189.938	85.3396	85.9373	0.920932	0.158302
LL0000014941	LOC101884563		101884563	0	25.5535	0	9.84137	4.9616	0.987785	0.925781	-0.694573
LL0000029601	sts	ENSDARG00000053241.8	402795	6.91893	20.6393	0.989281	9.84137	20.8387	8.89006	0.913191	0.470502
LL0000012743	inavaa	ENSDARG00000078155.5	567844	26.6873	25.5535	43.5284	23.6193	43.6621	20.7435	0.958186	-0.12175
LL0000017847	LOC110439819		110439819	0	3.9313	8.90353	9.84137	6.94624	7.90228	0.833211	0.94403
LL0000028963	smc2	ENSDARG00000017744.10	321452	1708.98	1498.81	1627.37	1729.13	1228.49	1284.12	0.668192	-0.188876
LL0000002012	bri3bp	ENSDARG00000010108.8	327046	381.53	387.233	372.959	391.687	374.105	345.725	0.955824	-0.0386791
LL0000010148	fastk	ENSDARG00000077075.5	564534	298.502	323.35	278.977	339.527	324.489	252.873	0.976344	0.0254759
LL0000002953	BX511265.2	ENSDARG00000094139.3		0	11.7939	13.8499	0	6.94624	5.92671	0.870353	-0.994631
LL0000029384	srpk1a	ENSDARG00000073997.4	323679	500.14	472.739	489.694	613.118	559.669	538.343	0.510529	0.226466
LL0000008837	depdc7b	ENSDARG00000053246.6	337546	0	9.82826	4.94641	0	0	6.91449	1	-1.09551
LL0000029668	sult3st3	ENSDARG00000094089.3	571461	0	4.91413	11.8714	0.984137	1.98464	1.97557	1	-1.76356
LL0000011059	gabra1	ENSDARG00000068989.6	768183	9.88418	20.6393	25.7213	5.90482	7.93856	2.96335	0.298421	-1.74291
LL0000024185	samd4b	ENSDARG00000086735.4	100330543	1217.73	1202	1273.21	1026.46	1339.63	1306.84	0.989902	-0.00785582
LL0000016615	LOC108183341		108183341	50.4093	70.7634	43.5284	33.4607	74.424	40.4992	0.938754	-0.150791
LL0000010249	fdxr	ENSDARG00000089369.5	100536115	112.68	196.565	112.778	153.525	97.2474	93.8396	0.795496	-0.292349
LL0000013508	lama5	ENSDARG00000058543.6	321243	2093.47	3544.07	2827.37	1657.29	2739.8	2144.48	0.422692	-0.371876
LL0000013145	kcnj13	ENSDARG00000043443.7	555691	176.927	130.716	106.842	45.2703	86.3319	93.8396	0.179109	-0.878679
LL0000031733	usp49	ENSDARG00000000229.9	559473	341.993	337.109	300.742	473.37	421.736	341.774	0.412289	0.336087
LL0000030130	tecpr1a	ENSDARG00000062515.6	556500	33.6062	17.6909	32.6463	13.7779	57.5546	41.487	0.850381	0.426455
LL0000023733	rmnd1	ENSDARG00000027465.7	553810	63.2588	14.7424	15.8285	30.5083	22.8234	26.6702	0.936642	-0.229854
LL0000028624	slc25a42	ENSDARG00000099368.2	751743	51.3978	58.9695	49.4641	58.0641	32.7466	42.4748	0.866673	-0.261902
LL0000017313	LOC110438317		110438317	68.2009	63.8837	16.8178	86.6041	65.4931	33.5847	0.887956	0.318426
LL0000028745	slc38a9	ENSDARG00000032769.7	562137	439.846	449.151	363.066	245.05	268.919	313.128	0.041581	-0.598216
LL0000009876	exoc7	ENSDARG00000087229.5	406723	522.873	468.808	493.651	396.607	386.013	395.114	0.23629	-0.33475
LL0000015616	LOC103909406		103909406	62.2704	127.767	88.046	55.1117	118.086	76.0594	0.926739	-0.158091
LL0000018872	meox2a	ENSDARG00000040911.4	556898	878.704	912.062	930.914	70.8579	102.209	74.0839	4.95278e-54	-3.46129
LL0000020327	nit1	ENSDARG00000070116.4	447900	2.96526	0.982826	0	4.92069	1.98464	8.89006	1	2.00047
LL0000007275	crb2a	ENSDARG00000060106.6	723994	78.0851	131.699	216.653	135.811	193.502	250.897	0.675411	0.444249
LL0000011127	GALNTL6	ENSDARG00000040048.8	568915	11.861	29.4848	58.3676	47.2386	40.6851	80.9984	0.631728	0.76058
LL0000007305	crfb12	ENSDARG00000052413.7	678605	14.8263	56.0211	10.8821	17.7145	16.8694	19.7557	0.816385	-0.589089
LL0000016289	LOC108179131		108179131	27.6757	0	0	0	0	0	0.339372	-5.66548
LL0000011193	gbp2	ENSDARG00000038669.8	570622	4.94209	0.982826	2.96784	21.651	15.8771	5.92671	0.26099	2.28944
LL0000040001	LOC108190746		108190746	1631.88	1191.18	1095.13	1389.6	861.334	829.739	0.510723	-0.346918
LL0000004093	CABZ01039096.1	ENSDARG00000116302.1		26.6873	57.9867	35.6141	39.3655	78.3933	59.2671	0.678263	0.55719
LL0000001746	b4galnt4b	ENSDARG00000076701.5	559305	27.6757	72.7291	124.649	96.4455	106.178	140.265	0.630338	0.607489
LL0000024538	setd7	ENSDARG00000038858.4	436729	105.761	162.166	124.649	123.017	131.979	158.046	0.951254	0.0732257
LL0000015166	LOC101885678		101885678	35.5831	39.313	55.3998	29.5241	36.7159	50.377	0.934751	-0.160007
LL0000006577	CR392341.1	ENSDARG00000093623.2	101883059	0	1.96565	1.97856	23.6193	0.99232	11.8534	0.267725	3.2085
LL0000004609	CABZ01087953.1	ENSDARG00000104106.2		0	12.7767	0	19.6827	0	4.93892	0.910854	0.946183
LL0000015769	LOC103910014		103910014	0	25.5535	32.6463	0	0	12.8412	0.656814	-2.18019
LL0000022443	ppp1r3b	ENSDARG00000044691.8	327285	218.44	179.857	251.277	229.304	202.433	410.919	0.633538	0.375494
LL0000031455	ubap2b	ENSDARG00000060065.7	570789	1567.63	1402.49	1530.42	2348.15	1794.12	2061.51	0.0224828	0.463071
LL0000027305	si:dkey-23i12.5	ENSDARG00000103682.2	325112	105.761	139.561	105.853	202.732	253.042	313.128	0.00149141	1.13051
LL0000011033	fzr1a	ENSDARG00000015254.11	393223	521.885	533.674	668.754	474.354	453.49	609.463	0.783327	-0.165592
LL0000018258	LOC798783		798783	0	10.8111	33.6356	16.7303	35.7235	70.1327	0.559158	1.46373
LL0000030860	tpcn2	ENSDARG00000100420.2	777614	202.626	262.414	278.977	211.59	216.326	209.41	0.727728	-0.223322
LL0000016732	LOC108183843		108183843	0	3.9313	0	11.8096	0	0	1	1.58647
LL0000027306	si:dkey-23i12.7	ENSDARG00000105562.2	100007087	17.7915	103.197	42.5391	17.7145	83.3549	75.0717	0.970396	0.106988
LL0000029719	swap70b	ENSDARG00000057286.7	562490	189.776	204.428	217.642	288.352	180.602	121.498	0.969319	-0.0512855
LL0000017014	LOC110437791		110437791	36.5715	30.4676	17.8071	18.6986	70.4548	42.4748	0.719457	0.633325
LL0000037183	XLOC_038945			0	5.89695	0	3.93655	2.97696	11.8534	0.769068	1.66912
LL0000024971	si:ch211-117m20.4	ENSDARG00000094286.2	566599	4.94209	1.96565	0	11.8096	1.98464	1.97557	0.835685	1.1912
LL0000025224	si:ch211-160j14.3	ENSDARG00000089078.4	101886266	367.692	327.281	318.549	147.621	275.865	155.082	0.0571175	-0.808927
LL0000040478	LOC103911096		103911096	0	3.9313	22.7535	0.984137	2.97696	11.8534	0.903674	-0.754679
LL0000023112	rac1a	ENSDARG00000074849.4	327204	1402.57	913.045	808.243	740.071	775.995	671.694	0.155789	-0.51387
LL0000006360	CR381544.2	ENSDARG00000091015.4	101883438	11.861	95.3341	41.5498	38.3814	70.4548	40.4992	0.999826	0.00549667
LL0000014230	LOC100334911			0	24.5706	42.5391	0	15.8771	0	0.863027	-2.07966
LL0000010354	fig4a		100334605	111.691	103.197	161.253	85.6199	105.186	115.571	0.756269	-0.295948
LL0000038298	zbtb12.1	ENSDARG00000103949.2	559143	63.2588	122.853	126.628	140.732	89.3088	165.948	0.772024	0.340517
LL0000001291	arhgap42a	ENSDARG00000056619.7	566275	704.742	770.535	970.485	620.991	787.902	853.446	0.871453	-0.112478
LL0000017890	LOC110439889		110439889	86.9808	114.991	106.842	18.6986	42.6698	47.4137	0.0141652	-1.50553
LL0000032854	XLOC_005605			0	9.82826	6.92497	7.8731	2.97696	7.90228	0.977538	0.162575
LL0000027505	si:dkey-283j8.1	ENSDARG00000076050.5	100332250	11.861	6.87978	21.7642	11.8096	3.96928	12.8412	0.883507	-0.500614
LL0000026592	si:ch73-92e7.6	ENSDARG00000094309.3	793732	95.8766	87.4715	138.499	94.4772	152.817	137.302	0.816243	0.256955
LL0000018610	map3k8	ENSDARG00000061710.6	563727	3.95367	4.91413	21.7642	15.7462	15.8771	6.91449	0.934082	0.331466
LL0000019479	mphosph10	ENSDARG00000012495.10	323426	104.772	101.231	134.542	192.891	178.618	150.143	0.187314	0.615308
LL0000026402	si:ch73-27e22.3	ENSDARG00000077263.5		17.7915	1.96565	0.989281	0	0	0	1	-5.24973
LL0000010452	FO082781.1	ENSDARG00000076638.4	100332760	1695.14	2016.76	2156.63	1946.62	2213.87	2614.67	0.590681	0.20725
LL0000029920	taf1a	ENSDARG00000052471.8	567105	63.2588	85.5058	77.164	118.096	77.401	99.7663	0.671409	0.38618
LL0000011543	gpatch4	ENSDARG00000091931.5	555692	88.9577	118.922	69.2497	182.065	142.894	156.07	0.11107	0.795485
LL0000022413	ppp1r10	ENSDARG00000032651.7	192329	1531.06	1785.79	1737.18	1813.77	1919.15	2095.09	0.454726	0.205557
LL0000004718	CABZ01117348.1	ENSDARG00000109770.1	100333835	76.1082	77.6432	96.9496	118.096	79.3856	60.2549	0.980166	0.0400483
LL0000011541	GPATCH2	ENSDARG00000101260.2	555214	395.367	453.083	575.762	418.258	455.475	452.406	0.889917	-0.102929
LL0000039385	zmynd8	ENSDARG00000007601.11	564460	304.433	346.937	282.934	251.939	299.681	257.812	0.712964	-0.207061
LL0000023130	rad51	ENSDARG00000041411.7	406487	131.46	131.699	112.778	154.51	102.209	96.8029	0.945214	-0.0886137
LL0000003292	BX649324.1	ENSDARG00000081240.2		118.61	130.716	146.414	86.6041	118.086	140.265	0.850725	-0.198193
LL0000038537	zgc:112083	ENSDARG00000037405.6	550461	129.483	163.149	193.899	172.224	201.441	167.923	0.870417	0.154638
LL0000005113	ccdc96	ENSDARG00000035963.6	559167	18.7799	28.5019	26.7106	28.54	10.9155	40.4992	0.967159	0.111917
LL0000018975	mgst1.2	ENSDARG00000022165.8	431762	7.90735	25.5535	4.94641	12.7938	32.7466	9.87785	0.873479	0.52844
LL0000036932	XLOC_036573			289.607	453.083	336.356	189.938	250.065	286.458	0.198768	-0.570874
LL0000002171	BX005003.1	ENSDARG00000098435.2	564205	67.2125	53.0726	64.3033	84.6358	49.616	48.4015	0.99261	-0.0150182
LL0000003904	c1qtnf6b	ENSDARG00000006544.7	570839	3.95367	10.8111	27.6999	19.6827	2.97696	14.8168	0.966338	-0.179916
LL0000022351	pparda	ENSDARG00000044525.8	30750	171.985	153.321	157.296	170.256	133.963	121.498	0.838436	-0.180862
LL0000011156	gas7a	ENSDARG00000074443.5	793701	7.90735	31.4504	38.582	23.6193	26.7927	36.548	0.955776	0.15794
LL0000009404	eef2a.1	ENSDARG00000042094.8	792182	517.931	704.686	646.99	722.357	1121.32	1066.81	0.0384722	0.638486
LL0000017109	LOC110437982		110437982	11.861	27.5191	13.8499	38.3814	16.8694	16.7923	0.863639	0.436582
LL0000012982	itsn2a	ENSDARG00000000161.13	566412	79.0735	88.4543	36.6034	281.463	223.272	196.569	8.004e-05	1.78043
LL0000022223	pnpla3	ENSDARG00000102020.2	436610	0.988418	14.7424	11.8714	2.95241	9.9232	21.7313	0.945818	0.326037
LL0000018973	mgrn1b	ENSDARG00000004796.8	553327	499.151	362.663	380.873	334.607	380.059	276.58	0.506355	-0.326154
LL0000012216	hnrnph3	ENSDARG00000039466.9	678601	21.7452	26.5363	47.4855	27.5558	35.7235	33.5847	0.993946	0.0164571
LL0000031684	use1	ENSDARG00000007250.8	393294	76.1082	56.0211	46.4962	43.302	39.6928	47.4137	0.69103	-0.45386
LL0000022657	prpf19	ENSDARG00000015239.10	321544	1003.24	443.254	606.43	928.041	574.554	638.109	0.959447	0.0604423
LL0000013220	kctd2	ENSDARG00000025875.9	751724	284.665	275.191	270.074	300.162	236.172	251.885	0.927052	-0.0743345
LL0000031713	usp3	ENSDARG00000045641.7	569679	170.996	142.51	136.521	157.462	136.94	147.18	0.979803	-0.0272783
LL0000021742	phyhipla	ENSDARG00000003998.10	790943	11.861	8.84543	28.6892	12.7938	24.808	6.91449	0.966239	-0.150083
LL0000008146	CU655820.1	ENSDARG00000097365.2		0	21.6222	7.91425	0	1.98464	10.8656	0.840537	-1.20089
LL0000034327	XLOC_016518			39.5367	59.9524	83.0996	76.7627	99.232	80.9984	0.624876	0.493107
LL0000014220	LOC100334559		100334559	2027.25	1280.62	1111.95	1807.86	1026.06	1110.27	0.861716	-0.164239
LL0000000309	adcy1a	ENSDARG00000069026.5	557026	0	2.94848	12.8607	5.90482	4.9616	7.90228	0.967159	0.247818
LL0000026886	si:dkey-176f19.7	ENSDARG00000103348.2		0	0	0	0	0	8.89006	1	4.02897
LL0000030430	tmed3	ENSDARG00000028816.9	336391	124.541	181.823	152.349	166.319	162.741	127.424	0.994851	-0.00708179
LL0000019702	mthfd2	ENSDARG00000098646.2	100004977	28.6641	74.6947	29.6784	186.002	98.2397	72.1083	0.0805805	1.42131
LL0000012924	itga3a	ENSDARG00000037917.7	407685	46.4557	73.7119	24.732	15.7462	24.808	26.6702	0.325238	-1.10825
LL0000013691	lin9	ENSDARG00000028475.8	560867	209.545	210.325	241.385	211.59	171.671	227.191	0.89671	-0.11526
LL0000013369	klf6b	ENSDARG00000038561.6	793760	4.94209	16.708	8.90353	0	14.8848	2.96335	0.875361	-0.776274
LL0000000930	alx4a	ENSDARG00000088332.4	100006399	1355.12	1333.69	987.303	2188.72	1508.33	1125.09	0.426166	0.391494
LL0000015382	LOC101886756		101886756	3.95367	5.89695	4.94641	26.5717	1.98464	4.93892	0.736311	1.17892
LL0000030026	tbcelb	ENSDARG00000019525.10	100332392	136.402	176.909	162.242	165.335	147.856	102.73	0.846276	-0.193305
LL0000014019	LOC100149991		100149991	2.96526	3.9313	1.97856	15.7462	4.9616	1.97557	0.71398	1.35384
LL0000035210	XLOC_023624			8.89577	2.94848	9.89281	10.8255	3.96928	13.829	0.923126	0.397545
LL0000029431	ssr4	ENSDARG00000019444.7	326701	341.004	341.04	262.16	319.845	347.312	272.629	0.993566	-0.00681289
LL0000031302	ttc36	ENSDARG00000011693.6	492516	18.7799	3.9313	2.96784	7.8731	0.99232	4.93892	0.837688	-0.89487
LL0000012463	id4	ENSDARG00000045131.6	664761	22.7336	9.82826	30.6677	2.95241	6.94624	6.91449	0.220334	-1.91123
LL0000011056	gabpb1	ENSDARG00000023659.11	768285	18.7799	35.3817	69.2497	36.4131	37.7082	39.5114	0.958868	-0.11904
LL0000000658	AL928808.1	ENSDARG00000101333.2		218.44	249.638	276.999	184.034	324.489	341.774	0.840393	0.190523
LL0000038326	zbtb44	ENSDARG00000061110.8	569656	372.634	317.453	352.184	318.86	339.374	404.992	0.970707	0.0287341
LL0000028782	SLC45A4_1_of_many	ENSDARG00000104981.2	100329687	68.2009	20.6393	27.6999	139.747	115.109	128.412	0.00792612	1.71771
LL0000004471	CABZ01078350.1	ENSDARG00000098711.2		19.7684	27.5191	5.93569	3.93655	10.9155	37.5358	0.995084	-0.0230016
LL0000000379	adipoqa	ENSDARG00000062228.7	562602	8.89577	2.94848	0	16.7303	0	15.8046	0.778712	1.45797
LL0000030748	tnip2	ENSDARG00000074501.4	564279	23.722	23.5878	18.7963	67.9055	28.7773	41.487	0.306435	1.0637
LL0000015092	LOC101885341		101885341	135.413	114.991	159.274	136.795	131.979	126.436	0.96248	-0.0517973
LL0000018480	lyrm1	ENSDARG00000026281.9	436779	8.89577	21.6222	23.7428	31.4924	33.7389	11.8534	0.834179	0.506456
LL0000017855	LOC110439827		110439827	19.7684	3.9313	3.95713	0	1.98464	5.92671	0.636332	-1.80579
LL0000026128	si:ch211-71m22.1	ENSDARG00000058638.7	100149582	74.1314	28.5019	44.5177	15.7462	24.808	19.7557	0.195228	-1.2869
LL0000024762	si:ch1073-127d16.1	ENSDARG00000087674.4	101883863	26.6873	10.8111	21.7642	17.7145	9.9232	11.8534	0.803934	-0.585232
LL0000020453	nog2	ENSDARG00000043066.7	30185	156.17	218.187	220.61	298.194	349.297	742.814	0.00905566	1.22451
LL0000023019	rab11fip2	ENSDARG00000101432.2	100334729	212.51	178.874	242.374	170.256	177.625	269.665	0.973826	-0.0373463
LL0000024443	sema5ba	ENSDARG00000061471.7	556471	138.379	199.514	228.524	62.9848	166.71	190.643	0.702709	-0.430395
LL0000039817	gga3a	ENSDARG00000103667.2	492643	124.541	200.496	140.478	136.795	118.086	121.498	0.706512	-0.30669
LL0000028799	slc4a1b	ENSDARG00000024560.10	561787	12.8494	19.6565	10.8821	4.92069	11.9078	14.8168	0.883507	-0.455657
LL0000000989	angptl6	ENSDARG00000020265.10	561927	1.97684	6.87978	8.90353	10.8255	24.808	14.8168	0.447029	1.506
LL0000018172	LOC569262		569262	409.205	366.594	444.187	254.892	355.251	350.664	0.429618	-0.34458
LL0000006041	commd10		550594	13.8379	19.6565	8.90353	9.84137	0.99232	2.96335	0.508573	-1.6189
LL0000000025	abat	ENSDARG00000006031.10	378968	775.908	822.625	863.643	367.083	443.567	677.621	0.0280493	-0.726307
LL0000010841	FQ378018.1	ENSDARG00000103102.2	100538098	96.865	127.767	124.649	257.844	169.687	109.644	0.383637	0.621032
LL0000011743	grin3bb	ENSDARG00000098667.2	100333101	101.807	116.956	156.306	128.922	190.526	164.96	0.625948	0.369027
LL0000002468	BX276102.1	ENSDARG00000098373.2	103911123	0	11.7939	8.90353	0	7.93856	0	0.856012	-1.3832
LL0000013028	jmjd1cb	ENSDARG00000079939.6	558436	9191.3	9483.28	9688.03	6698.04	7642.85	7440	0.00652348	-0.380932
LL0000008823	dennd2db	ENSDARG00000030250.8	492474	31.6294	6.87978	16.8178	16.7303	7.93856	2.96335	0.706512	-1.00123
LL0000032035	WDR7	ENSDARG00000100274.2	572502	793.7	908.131	807.254	647.562	741.263	737.875	0.440056	-0.238582
LL0000018845	med6	ENSDARG00000034734.6	415174	142.332	66.8321	138.499	166.319	102.209	124.461	0.90464	0.17696
LL0000000532	ak9	ENSDARG00000021913.9	557708	23.722	6.87978	14.8392	1.96827	19.8464	6.91449	0.852494	-0.661831
LL0000038132	XLOC_043986			15.8147	25.5535	6.92497	14.7621	22.8234	30.6213	0.843778	0.497769
LL0000003744	BX927404.1	ENSDARG00000105193.2		100.819	204.428	201.813	132.859	192.51	144.217	0.936481	-0.110855
LL0000020876	oma1	ENSDARG00000090503.4	100331186	100.819	131.699	98.9281	66.9213	168.694	98.7785	0.993566	0.0125997
LL0000029017	smtnl1	ENSDARG00000041257.6	503743	7.90735	7.8626	17.8071	23.6193	12.9002	19.7557	0.739395	0.74536
LL0000026960	si:dkey-190l8.2	ENSDARG00000091222.4	566640	0	39.313	27.6999	8.85724	16.8694	13.829	0.845395	-0.760728
LL0000036415	XLOC_032540		100535286	0	0	0	16.7303	0	37.5358	0.0419155	6.63884
LL0000001998	brd1b	ENSDARG00000051798.7	100009661	1788.05	1814.3	1803.46	1944.66	2201.96	2069.41	0.36994	0.20147
LL0000001833	bckdhb	ENSDARG00000014676.11	569980	333.097	221.136	184.006	311.972	218.31	193.606	0.982201	-0.028269
LL0000005369	cdk5rap2	ENSDARG00000024219.10	334460	953.824	987.74	1084.25	995.947	1120.33	1000.63	0.937984	0.0427786
LL0000026897	si:dkey-179k24.5	ENSDARG00000102262.2	108184003	0	19.6565	7.91425	0	7.93856	0.987785	0.772492	-1.62781
LL0000013393	klhl20	ENSDARG00000038801.6	406274	349.9	265.363	271.063	189.938	241.134	249.91	0.42732	-0.380246
LL0000008903	dhx30	ENSDARG00000077839.5	570735	103.784	85.5058	58.3676	156.478	155.794	153.107	0.051735	0.910027
LL0000004236	CABZ01059392.1	ENSDARG00000063108.6	100334305	6.91893	1.96565	11.8714	7.8731	9.9232	11.8534	0.897185	0.514835
LL0000004445	CABZ01075611.1	ENSDARG00000104519.2		13.8379	31.4504	8.90353	0	32.7466	14.8168	0.968716	-0.188587
LL0000004697	CABZ01112387.1	ENSDARG00000112168.1	101884494	529.792	886.509	791.425	480.259	717.448	601.561	0.611454	-0.295198
LL0000021091	osbpl5	ENSDARG00000076002.5	100006189	861.901	683.064	661.829	574.736	575.546	615.39	0.30738	-0.321724
LL0000024332	scyl1	ENSDARG00000079854.4	793792	347.923	325.315	334.377	416.29	299.681	337.822	0.936719	0.0647138
LL0000030046	tbx18	ENSDARG00000036930.7	572713	2099.4	1385.78	1493.81	436.957	408.836	385.236	6.40656e-21	-2.01597
LL0000005811	clk2b	ENSDARG00000059870.5	767784	104.772	135.63	158.285	136.795	172.664	163.972	0.772492	0.247854
LL0000034036	XLOC_014736			16.8031	5.89695	0	0	0	4.93892	0.727728	-2.20033
LL0000018623	map7d1a	ENSDARG00000098802.3	565172	336.062	478.636	334.377	316.892	424.713	342.761	0.927001	-0.0837092
LL0000018707	matn3a	ENSDARG00000069245.7	445503	39.5367	24.5706	49.4641	4.92069	19.8464	28.6458	0.492076	-1.08847
LL0000003719	BX927333.1	ENSDARG00000116937.1	567179	2319.82	2125.85	1918.22	1832.46	2246.61	1745.42	0.780292	-0.12779
LL0000015485	LOC103908684		103908684	0	23.5878	4.94641	0	15.8771	17.7801	0.970707	0.237888
LL0000023994	rps6ka1	ENSDARG00000033437.11	777728	347.923	230.964	228.524	898.517	463.414	359.554	0.0203291	1.09232
LL0000030085	tcf7	ENSDARG00000038672.9	497649	193.73	275.191	241.385	319.845	308.612	286.458	0.415057	0.365152
LL0000008635	cyth3a	ENSDARG00000007807.9	100002190	561.422	456.031	385.82	172.224	254.034	146.192	8.04154e-05	-1.29366
LL0000021806	pik3r3b	ENSDARG00000034409.7	100000252	249.081	347.92	437.262	272.606	362.197	292.384	0.863027	-0.157704
LL0000032396	XLOC_001639			0	2.94848	2.96784	0	8.93088	6.91449	1	1.42086
LL0000012090	hhipl2	ENSDARG00000060008.6	560376	0	7.8626	12.8607	15.7462	15.8771	8.89006	0.791314	0.96714
LL0000013371	klf7b	ENSDARG00000043821.8	553082	1680.31	1572.52	1477.99	827.659	853.396	742.814	2.78189e-10	-0.964786
LL0000013958	LOC100005965		100005965	8.89577	33.4161	26.7106	4.92069	26.7927	24.6946	0.931142	-0.291479
LL0000023769	rnf14	ENSDARG00000043905.6	415177	83.0271	92.3856	102.885	149.589	107.171	79.0228	0.808451	0.270969
LL0000000450	agap1	ENSDARG00000062123.8	100148154	2284.23	2756.83	2649.3	1901.35	2437.14	2516.88	0.689874	-0.165831
LL0000012329	hs3st3l	ENSDARG00000059903.7	100008592	0	1.96565	33.6356	15.7462	9.9232	27.658	0.91138	0.583175
LL0000009046	dnajb12b	ENSDARG00000087473.5	100037354	108.726	110.076	71.2283	123.017	87.3242	91.864	0.966692	0.0593437
LL0000018876	mep1b	ENSDARG00000037533.6	100151009	15.8147	0	1.97856	0	6.94624	2.96335	0.912628	-0.844713
LL0000023703	riok2	ENSDARG00000035264.6	407084	104.772	94.3513	68.2604	143.684	104.194	102.73	0.646956	0.390976
LL0000011016	fyco1b	ENSDARG00000078022.4	100329883	253.035	310.573	192.91	231.272	285.788	259.787	0.969836	0.0381635
LL0000020039	ncam1b	ENSDARG00000007220.12	114442	13.8379	51.1069	92.9925	26.5717	67.4778	44.4503	0.945335	-0.189554
LL0000026789	si:dkey-156k2.4	ENSDARG00000102927.2	108183316	36.5715	6.87978	7.91425	1.96827	10.9155	2.96335	0.494928	-1.69713
LL0000017148	LOC110438047		110438047	42.502	46.1928	33.6356	23.6193	61.5239	72.1083	0.840393	0.362123
LL0000030429	tmed2	ENSDARG00000026908.6	321550	1167.32	1059.49	1010.06	1240.01	1105.44	899.872	0.995139	0.00377876
LL0000021243	pan3	ENSDARG00000031637.9	100126012	894.519	652.596	708.326	898.517	969.497	832.703	0.491551	0.259944
LL0000015268	LOC101886104		101886104	1.97684	21.6222	3.95713	3.93655	7.93856	9.87785	0.944612	-0.341689
LL0000031439	uba1	ENSDARG00000037559.7	406335	4065.36	3319	3332.89	5691.27	4388.04	3815.81	0.207444	0.37465
LL0000030198	tfap2d	ENSDARG00000023272.7	566838	0	6.87978	10.8821	7.8731	8.93088	12.8412	0.870184	0.73899
LL0000002690	BX324006.2	ENSDARG00000117224.1		6.91893	13.7596	7.91425	1.96827	17.8618	13.829	0.955714	0.234873
LL0000036180	XLOC_031121			10.8726	39.313	45.5069	50.191	59.5392	65.1938	0.491586	0.870175
LL0000027255	si:dkey-238d18.3	ENSDARG00000088893.3	795978	11.861	0	0	0	0	0	1	-4.44306
LL0000020418	nme3	ENSDARG00000100990.2	30085	137.39	89.4371	105.853	115.144	67.4778	120.51	0.924601	-0.134048
LL0000027946	si:dkey-81j8.6	ENSDARG00000088831.4	101885880	7.90735	16.708	0.989281	124.001	57.5546	33.5847	0.00644292	3.07022
LL0000020166	nectin1b	ENSDARG00000086034.4	557665	1208.84	1130.25	1087.22	1022.52	1264.22	1156.7	0.990401	0.00717015
LL0000026775	si:dkey-150k17.3		103909241	4.94209	3.9313	3.95713	0	6.94624	9.87785	0.947651	0.390727
LL0000006984	CR847503.1	ENSDARG00000092715.3	108190967	114.657	106.145	93.9817	170.256	100.224	105.693	0.807285	0.257132
LL0000016752	LOC108183929		108183929	0	0	4.94641	8.85724	9.9232	0.987785	0.712278	1.99941
LL0000023215	rasal3	ENSDARG00000089933.4	798492	25.6989	20.6393	30.6677	777.468	511.045	317.079	1.84479e-24	4.38221
LL0000025550	si:ch211-212k18.7	ENSDARG00000055504.6	100000085	72.1545	32.4332	31.657	180.097	120.071	90.8762	0.0183756	1.52126
LL0000009735	eprs	ENSDARG00000060494.8	562037	1902.71	1581.37	1687.71	2482.98	2183.1	2047.68	0.0760253	0.376475
LL0000006164	cpox	ENSDARG00000062025.7	321294	74.1314	82.5574	89.0353	121.049	111.14	95.8151	0.557754	0.416697
LL0000024705	si:busm1-180g5.6		368512	10.8726	3.9313	0	0	3.96928	7.90228	0.967159	-0.31862
LL0000026565	si:ch73-57f22.2	ENSDARG00000087453.4	100149889	76.1082	35.3817	28.6892	21.651	18.8541	26.6702	0.348379	-1.06118
LL0000013499	lactb	ENSDARG00000040803.4	553619	110.703	100.248	130.585	118.096	80.378	81.9862	0.771164	-0.284094
LL0000013919	LOC100002923		100002923	11.861	17.6909	31.657	15.7462	37.7082	24.6946	0.892111	0.352384
LL0000013087	kbtbd7	ENSDARG00000078001.6	794299	55.3514	69.7806	56.389	78.731	43.6621	60.2549	0.995454	0.00901838
LL0000025369	si:ch211-193k19.2	ENSDARG00000077572.6	100034574	12.8494	7.8626	13.8499	17.7145	4.9616	0	0.901629	-0.607608
LL0000022449	ppp1r7	ENSDARG00000009740.8	560323	206.579	173.96	162.242	268.669	193.502	195.581	0.685532	0.277243
LL0000020919	oprk1	ENSDARG00000006894.6	360139	0	0	1.97856	0	0	8.89006	1	2.16834
LL0000008347	CU929073.1	ENSDARG00000104824.2	100537347	8.89577	6.87978	7.91425	6.88896	9.9232	8.89006	0.974913	0.117571
LL0000039200	zgc:66156	ENSDARG00000112287.1	108181090	0	9.82826	0	0	20.8387	0	0.916669	1.08374
LL0000001418	arrdc3a	ENSDARG00000052690.6	566685	1295.82	1087.01	905.193	1064.84	1040.94	1011.49	0.905186	-0.0769325
LL0000022805	ptch1	ENSDARG00000095859.2	30189	3654.18	4100.35	5252.1	5479.68	6971.05	6954.01	0.0122129	0.577161
LL0000018971	mgp	ENSDARG00000086189.5	402937	3.95367	22.605	18.7963	27.5558	15.8771	15.8046	0.904301	0.385207
LL0000006181	cpz	ENSDARG00000075521.6	557534	114.657	167.08	144.435	37.3972	107.171	105.693	0.35307	-0.768162
LL0000030564	tmem229a		794725	0	0.982826	3.95713	0	15.8771	0.987785	0.792136	1.77141
LL0000031437	uap1	ENSDARG00000052170.7	322513	137.39	228.998	150.371	207.653	169.687	183.728	0.91581	0.118629
LL0000012367	hsp70.3	ENSDARG00000021924.9	30671	2.96526	31.4504	249.299	77.7468	44.6544	194.594	0.978413	0.160048
LL0000011902	h2afx	ENSDARG00000029406.4	394048	1117.9	776.432	652.926	979.217	704.548	621.317	0.869035	-0.144106
LL0000001949	bmp4	ENSDARG00000019995.11	30612	877.716	764.638	591.59	318.86	446.544	280.531	0.000176138	-1.09485
LL0000001183	apobb.2	ENSDARG00000075016.8	100330435	38.5483	13.7596	8.90353	7.8731	9.9232	32.5969	0.937443	-0.28052
LL0000000021	aass	ENSDARG00000051816.6	556229	248.093	244.724	197.856	309.019	352.274	268.678	0.29418	0.429129
LL0000018267	LOC799924		799924	0.988418	0	3.95713	7.8731	0	0	1	0.671543
LL0000026945	si:dkey-188i13.11	ENSDARG00000092895.2	100004663	0	10.8111	1.97856	7.8731	9.9232	7.90228	0.82777	1.00601
LL0000019909	myom2a	ENSDARG00000075433.5	334269	1613.1	1041.8	558.944	270.638	737.294	635.146	0.409432	-0.967907
LL0000038772	zgc:154075	ENSDARG00000067630.4	556929	19.7684	22.605	66.2819	26.5717	32.7466	17.7801	0.819161	-0.494931
LL0000022534	prdx3	ENSDARG00000032102.10	373079	103.784	114.008	132.564	144.668	128.009	112.607	0.900362	0.137154
LL0000023068	rab3gap1	ENSDARG00000098079.2	777744	305.421	451.117	512.448	428.1	451.506	440.552	0.949391	0.0570224
LL0000024977	si:ch211-119e14.1	ENSDARG00000099518.2	560599	54.363	24.5706	24.732	78.731	38.7005	35.5603	0.729732	0.561711
LL0000025937	si:ch211-271b14.1	ENSDARG00000101808.2	777712	1202.91	718.446	735.036	1089.44	859.349	885.055	0.916669	0.0933212
LL0000013524	lamtor4	ENSDARG00000045542.6	561019	53.3746	53.0726	57.3783	115.144	84.3472	70.1327	0.297192	0.718875
LL0000012064	herpud1	ENSDARG00000024314.12	565499	217.452	194.599	158.285	317.876	249.072	203.484	0.422496	0.433878
LL0000031956	waca	ENSDARG00000012577.9	323904	1845.38	1760.24	2002.31	1896.43	1809.99	1825.43	0.967159	-0.0196899
LL0000008537	cylda	ENSDARG00000060058.9	556823	328.155	518.932	435.284	302.13	292.735	284.482	0.126712	-0.54434
LL0000019409	mmp20b	ENSDARG00000055479.6	100537445	19.7684	17.6909	16.8178	0	11.9078	2.96335	0.443091	-1.86873
LL0000040172	si:ch211-262e15.1	ENSDARG00000011609.10	798356	904.403	788.226	985.324	1244.93	1048.88	1329.56	0.0751728	0.436238
LL0000029347	spty2d1	ENSDARG00000033889.11	337191	367.692	303.693	376.916	392.671	346.32	324.981	0.978747	0.0214688
LL0000029167	sostdc1b	ENSDARG00000056021.5	564783	9.88418	6.87978	1.97856	12.7938	7.93856	19.7557	0.67406	1.11115
LL0000002434	BX248497.1	ENSDARG00000092673.2		36.5715	93.3684	80.1318	39.3655	56.5623	60.2549	0.763065	-0.427786
LL0000031570	ugt1b1	ENSDARG00000097491.2	558508	4506.2	2549.45	2104.2	1675	1549.01	1190.28	0.0015267	-1.05314
LL0000023918	rpl3	ENSDARG00000003599.10	322571	12092.3	7148.09	8429.67	15264	9110.49	10355	0.52245	0.327836
LL0000008616	cyp4v8	ENSDARG00000062132.6	558851	0	13.7596	7.91425	0	0.99232	5.92671	0.779038	-1.64751
LL0000011338	gipc2	ENSDARG00000009488.7	393904	35.5831	27.5191	29.6784	13.7779	10.9155	15.8046	0.283358	-1.19582
LL0000004531	CABZ01081752.3	ENSDARG00000103244.3	557537	21.7452	28.5019	41.5498	65.9372	55.5699	22.7191	0.667985	0.651884
LL0000022028	pkmyt1	ENSDARG00000074730.5	100049158	143.321	122.853	153.339	99.3979	138.925	107.669	0.736311	-0.27803
LL0000004043	CABZ01026153.1	ENSDARG00000117297.1	101883437	705.731	965.135	793.404	701.69	981.405	709.23	0.957137	-0.0427957
LL0000004957	cavin1b	ENSDARG00000059362.6	561082	531.769	508.121	351.195	899.501	808.741	450.43	0.169389	0.633925
LL0000030831	tor1	ENSDARG00000077950.6	565062	475.429	432.443	433.305	406.449	363.189	341.774	0.463083	-0.271075
LL0000001012	ankmy2a	ENSDARG00000005948.8	334389	291.583	235.878	287.881	301.146	320.519	244.971	0.91895	0.0880435
LL0000024769	si:ch1073-153i20.4	ENSDARG00000105350.2	103911343	874.75	407.873	304.699	685.944	380.059	275.592	0.863639	-0.242615
LL0000010325	fggy	ENSDARG00000038667.7	406567	0.988418	23.5878	20.7749	11.8096	22.8234	23.7068	0.924707	0.363144
LL0000036439	XLOC_032715			28.6641	74.6947	123.66	62.9848	96.2551	72.1083	0.989902	0.0272179
LL0000030458	tmem119b	ENSDARG00000068036.4	797637	605.9	637.854	699.422	672.166	618.216	708.242	0.947473	0.0406112
LL0000001755	b4gat1	ENSDARG00000077583.5	101669768	218.44	161.183	268.095	181.081	195.487	250.897	0.96751	-0.0457767
LL0000009334	e2f8	ENSDARG00000057323.8	565952	942.951	841.299	839.9	1339.41	1357.49	1206.09	0.000774275	0.572735
LL0000010949	ftr53	ENSDARG00000041220.7	368624	4.94209	9.82826	1.97856	24.6034	6.94624	5.92671	0.703398	1.16173
LL0000024808	si:ch1073-268j14.1	ENSDARG00000099437.2	100149084	1369.95	2066.88	2171.47	731.214	852.403	983.834	3.72646e-06	-1.12724
LL0000000966	anapc15	ENSDARG00000101285.3	751740	3.95367	25.5535	18.7963	29.5241	18.8541	14.8168	0.90373	0.387591
LL0000013234	kdelr2b	ENSDARG00000037361.5	325464	542.642	509.104	399.67	426.131	473.337	352.639	0.707213	-0.213134
LL0000012508	ifrd1	ENSDARG00000068708.5	555178	224.371	372.491	360.098	343.464	375.097	325.969	0.889944	0.126283
LL0000008696	dbt	ENSDARG00000101561.2	541388	343.97	249.638	347.238	324.765	282.811	402.028	0.912865	0.101828
LL0000004199	CABZ01055489.1	ENSDARG00000113739.1	103909985	68.2009	116.956	106.842	103.334	141.902	115.571	0.761887	0.305141
LL0000019482	mphosph9			68.2009	54.0554	46.4962	23.6193	37.7082	28.6458	0.292124	-0.907519
LL0000021425	pcgf5b	ENSDARG00000052388.7	692252	5.93051	9.82826	12.8607	36.4131	35.7235	19.7557	0.140867	1.68296
LL0000036470	XLOC_032903			0	7.8626	3.95713	2.95241	9.9232	4.93892	0.920932	0.591225
LL0000001495	aspg	ENSDARG00000052942.7	100124594	43.4904	69.7806	35.6141	38.3814	76.4087	65.1938	0.874273	0.273409
LL0000025892	si:ch211-261d9.1	ENSDARG00000104932.2	103910728	0	0	0	0	3.96928	8.89006	1	4.56147
LL0000038564	zgc:112970	ENSDARG00000098332.2	541543	114.657	193.617	150.371	235.209	125.032	161.997	0.878574	0.187361
LL0000011278	gfra3	ENSDARG00000087704.3	556647	130.471	245.706	363.066	146.636	170.679	260.775	0.752254	-0.354754
LL0000022547	prex2	ENSDARG00000071692.7	557288	2800.19	2676.23	2655.23	1367.95	1724.65	1528.1	9.15302e-08	-0.815457
LL0000026869	si:dkey-172k15.5		797633	166.054	221.136	257.213	188.954	265.942	272.629	0.850238	0.174988
LL0000015055	LOC101885117		101885117	60.2935	60.9352	163.231	102.35	79.3856	83.9617	0.957137	-0.0983217
LL0000019556	mrpl39	ENSDARG00000041570.9	334588	107.738	48.1585	85.0782	149.589	114.117	113.595	0.394961	0.647001
LL0000038683	zgc:136963	ENSDARG00000086603.4	664694	0	0.982826	0	5.90482	0.99232	11.8534	1	4.14401
LL0000026555	si:ch73-46j18.5	ENSDARG00000092467.3	335949	2040.1	1734.69	1588.79	1911.19	1364.44	1300.91	0.618223	-0.228916
LL0000038291	zar1	ENSDARG00000019706.6	369189	12.8494	5.89695	12.8607	4.92069	3.96928	4.93892	0.64452	-1.19228
LL0000003563	BX901883.3	ENSDARG00000097948.3	101886369	30.641	12.7767	22.7535	9.84137	14.8848	44.4503	0.984054	0.0641723
LL0000018473	lyn	ENSDARG00000107511.2	447804	312.34	296.813	326.463	728.262	491.199	416.845	0.0141429	0.806499
LL0000030175	tesk2	ENSDARG00000061450.6	568213	233.267	206.393	193.899	253.907	241.134	207.435	0.841964	0.148983
LL0000010678	FP017274.1	ENSDARG00000097369.2		0	5.89695	11.8714	0	1.98464	13.829	0.982434	-0.168135
LL0000030451	tmem108	ENSDARG00000090230.3	563089	1065.52	872.749	731.079	721.373	757.14	569.952	0.29559	-0.381949
LL0000011577	gpn3	ENSDARG00000069525.4	100000326	8.89577	22.605	8.90353	33.4607	33.7389	20.7435	0.441127	1.12168
LL0000013398	klhl24b	ENSDARG00000008275.10	393412	342.981	207.376	268.095	248.003	189.533	211.386	0.596233	-0.334762
LL0000020486	notch3	ENSDARG00000052139.8	58066	5783.24	6081.72	8585.97	4903.96	6814.26	8888.09	0.990401	0.0109194
LL0000023196	rapgefl1	ENSDARG00000079912.5	100149497	34.5946	77.6432	34.6249	92.5089	51.6007	63.2182	0.719244	0.497352
LL0000021310	pask	ENSDARG00000075008.7	322674	314.317	298.779	300.742	284.416	433.644	369.432	0.656814	0.250936
LL0000008950	dirc2	ENSDARG00000009783.7	447858	265.885	143.493	146.414	94.4772	126.025	142.241	0.35331	-0.615605
LL0000022705	prss23	ENSDARG00000055786.5	563933	573.283	521.88	568.837	487.148	447.537	426.723	0.34254	-0.289522
LL0000014793	LOC101883807		101883807	26.6873	33.4161	23.7428	8.85724	27.785	29.6335	0.891865	-0.339545
LL0000008874	dhdds	ENSDARG00000039851.6	406468	34.5946	67.815	42.5391	67.9055	95.2628	58.2793	0.551822	0.611196
LL0000020148	ndufs3	ENSDARG00000015385.6	550451	91.9229	90.42	97.9389	125.97	135.948	93.8396	0.667089	0.344005
LL0000009993	fam149a	ENSDARG00000073709.6	100001989	50.4093	34.3989	41.5498	11.8096	27.785	20.7435	0.31819	-1.06663
LL0000027876	si:dkey-77f5.11	ENSDARG00000097481.3		221.406	137.596	80.1318	187.97	193.502	184.716	0.719457	0.36662
LL0000026801	si:dkey-159n16.2	ENSDARG00000114577.1	108183819	14.8263	22.605	43.5284	11.8096	28.7773	38.5236	0.990401	-0.0333815
LL0000028548	slc1a8a	ENSDARG00000104204.2	570702	0	2.94848	9.89281	0	12.9002	19.7557	0.802038	1.3466
LL0000024307	sco1	ENSDARG00000067593.5	796572	81.0503	53.0726	46.4962	78.731	90.3012	74.0839	0.674978	0.428694
LL0000021111	ostn	ENSDARG00000054055.7	100333936	13.8379	20.6393	0	0	7.93856	6.91449	0.819792	-1.21529
LL0000006155	cpne4a	ENSDARG00000101095.2	558729	0	3.9313	4.94641	9.84137	11.9078	25.6824	0.267795	2.41741
LL0000025446	si:ch211-199i15.5	ENSDARG00000103231.2		70.1777	114.991	63.314	24.6034	61.5239	71.1205	0.572168	-0.660309
LL0000013165	kcnj9	ENSDARG00000061636.8	100334285	22.7336	22.605	46.4962	3.93655	14.8848	32.5969	0.709386	-0.836819
LL0000004364	CABZ01070579.1	ENSDARG00000117759.1		0.988418	9.82826	17.8071	14.7621	21.831	27.658	0.626249	1.16651
LL0000024248	sc5d	ENSDARG00000044642.6	447891	53.3746	100.248	47.4855	117.112	75.4164	67.1694	0.783742	0.368789
LL0000025255	si:ch211-163l21.11	ENSDARG00000095855.2	101886753	17.7915	11.7939	16.8178	26.5717	31.7543	87.9129	0.119695	1.65615
LL0000020711	nucks1a	ENSDARG00000078473.4	447862	4921.34	4196.67	4101.56	5388.15	3696.39	3473.05	0.918733	-0.0741056
LL0000015447	LOC101887064		101887064	26.6873	33.4161	30.6677	15.7462	44.6544	20.7435	0.947626	-0.162057
LL0000022747	psmb2	ENSDARG00000031511.5	436882	343.97	307.624	256.224	496.989	282.811	244.971	0.867505	0.174875
LL0000038731	zgc:153426	ENSDARG00000104436.2	767746	4.94209	9.82826	28.6892	2.95241	4.9616	9.87785	0.627963	-1.28844
LL0000029807	szrd1	ENSDARG00000056338.5	554231	293.56	311.556	302.72	400.544	297.696	250.897	0.94642	0.0642252
LL0000001130	ap2m1b	ENSDARG00000033899.8	394001	1250.35	883.56	1085.24	1061.88	939.727	832.703	0.711775	-0.183652
LL0000010566	fosab	ENSDARG00000031683.8	394198	6594.73	9696.56	8563.22	6979.5	9708.86	8440.62	0.982871	0.0158399
LL0000036493	XLOC_033063			0	0	10.8821	11.8096	8.93088	29.6335	0.518494	2.21129
LL0000024229	sb:cb230		100004225	2.96526	11.7939	15.8285	0	22.8234	6.91449	0.993833	-0.0410005
LL0000006871	CR762431.1	ENSDARG00000092448.3	101882784	311.352	363.645	191.921	142.7	287.773	251.885	0.706488	-0.345465
LL0000008962	dkk1b	ENSDARG00000045219.7	30197	22.7336	31.4504	25.7213	58.0641	92.2858	75.0717	0.013423	1.49605
LL0000009390	eea1	ENSDARG00000062868.7	492695	731.43	712.549	751.854	661.34	657.908	599.585	0.550952	-0.19453
LL0000024559	sfi1	ENSDARG00000053992.6	560147	239.197	233.912	250.288	344.448	311.589	277.568	0.332202	0.368055
LL0000012138	HIST2H3A	ENSDARG00000114370.1	100334933	388.448	253.569	224.567	256.86	190.526	197.557	0.482284	-0.42611
LL0000009159	dph2	ENSDARG00000078077.6	562538	114.657	89.4371	88.046	67.9055	99.232	80.9984	0.832284	-0.235611
LL0000011562	gpd2	ENSDARG00000062430.7	751628	280.711	263.397	202.803	277.527	308.612	231.142	0.880399	0.12985
LL0000012753	inhbaa	ENSDARG00000012671.8	30072	107.738	160.201	227.535	274.574	257.011	150.143	0.581525	0.460411
LL0000000374	adh5	ENSDARG00000080010.6	116517	486.302	288.951	433.305	701.69	425.705	425.735	0.577051	0.361962
LL0000010009	FAM163B_1_of_many	ENSDARG00000107989.2	794939	104.772	80.5917	45.5069	21.651	59.5392	17.7801	0.240905	-1.2223
LL0000008777	ddx24	ENSDARG00000104708.2	553462	146.286	216.222	240.395	493.053	354.258	344.737	0.00516827	0.983466
LL0000007846	CU179643.1	ENSDARG00000086489.4		31.6294	42.2615	33.6356	0	8.93088	7.90228	0.0484513	-2.67614
LL0000038737	zgc:153631	ENSDARG00000068993.6	751714	199.661	94.3513	131.574	128.922	159.764	122.485	0.971546	-0.0496819
LL0000022477	ppp2r5eb	ENSDARG00000069118.7	373878	1257.27	1067.35	1222.75	1257.73	1058.81	952.225	0.820847	-0.117979
LL0000028215	si:dkeyp-57d7.4	ENSDARG00000101597.2	101885851	15.8147	57.0039	74.1961	46.2545	81.3703	81.9862	0.767579	0.511681
LL0000029603	stt3b	ENSDARG00000001890.11	323918	1950.15	2065.9	1864.8	2650.28	2576.06	1982.48	0.28611	0.293738
LL0000001233	arf1	ENSDARG00000009484.9	114428	1380.82	1235.41	1104.04	1156.36	997.282	872.214	0.348813	-0.298051
LL0000013289	kif16bb	ENSDARG00000080018.5	567045	5.93051	20.6393	10.8821	6.88896	0	8.89006	0.724419	-1.24673
LL0000013892	LOC100000545		100000545	8.89577	13.7596	33.6356	13.7779	40.6851	73.0961	0.485932	1.18025
LL0000015645	LOC103909508		103909508	46.4557	64.8665	63.314	45.2703	50.6083	86.9251	0.970046	0.0659022
LL0000013130	kcnh6a	ENSDARG00000001803.12	405763	21.7452	24.5706	43.5284	22.6352	3.96928	55.316	0.969098	-0.133051
LL0000004857	camsap2a	ENSDARG00000062173.7	562741	704.742	643.751	813.189	758.77	849.426	882.092	0.59768	0.20417
LL0000029002	smpd1	ENSDARG00000076121.5	556700	341.004	260.449	262.16	158.446	177.625	181.752	0.0214787	-0.737932
LL0000033375	XLOC_009823			19.7684	11.7939	11.8714	4.92069	8.93088	0	0.545516	-1.6491
LL0000029753	syngap1b	ENSDARG00000069765.8	100151149	1.97684	7.8626	3.95713	10.8255	1.98464	11.8534	0.837827	0.837957
LL0000004618	CABZ01088274.1	ENSDARG00000098174.2	100037342	89.9461	171.994	100.907	122.033	126.025	176.814	0.85107	0.227558
LL0000023741	rnasekb	ENSDARG00000104458.2	336290	7.90735	13.7596	21.7642	14.7621	12.9002	13.829	0.983797	-0.0658265
LL0000024054	RSPH1	ENSDARG00000102261.3	100003444	20.7568	13.7596	2.96784	20.6669	15.8771	5.92671	0.963365	0.180176
LL0000009279	dusp22a	ENSDARG00000056396.5	436787	0	11.7939	1.97856	8.85724	13.8925	3.95114	0.845295	0.954404
LL0000038487	zgc:103755	ENSDARG00000104663.2	449988	18.7799	22.605	4.94641	7.8731	8.93088	11.8534	0.806206	-0.693279
LL0000019077	mir125a-2	ENSDARG00000081044.2	100033635	4.94209	9.82826	2.96784	0	0.99232	10.8656	0.927727	-0.581188
LL0000031808	vat1	ENSDARG00000056481.5	368752	5442.23	3924.42	3942.29	3536.99	3175.43	2709.49	0.0477845	-0.498299
LL0000040363	CT573793.3	ENSDARG00000104445.2		28.6641	5.89695	0	0	10.9155	8.89006	0.900629	-0.803425
LL0000032147	wu:fe02h09			0	9.82826	15.8285	12.7938	12.9002	14.8168	0.875065	0.658961
LL0000021575	pdzk1ip1	ENSDARG00000017127.8	368722	5.93051	29.4848	21.7642	0	5.95392	25.6824	0.836706	-0.854042
LL0000023997	rps6ka3b	ENSDARG00000057927.7	100009657	424.031	476.67	412.53	194.859	147.856	156.07	7.77353e-09	-1.39656
LL0000004660	CABZ01100304.1	ENSDARG00000116101.1		0	0	10.8821	0	0	0	1	-4.31875
LL0000014794	LOC101883808		101883808	30.641	0	3.95713	0	1.98464	14.8168	0.871245	-1.04204
LL0000025415	si:ch211-196l7.4	ENSDARG00000095451.3		197.684	196.565	202.803	182.065	160.756	193.606	0.837032	-0.154431
LL0000033222	XLOC_008602			0	12.7767	12.8607	3.93655	7.93856	0	0.852494	-1.11061
LL0000032651	XLOC_003718			15.8147	26.5363	26.7106	3.93655	24.808	37.5358	0.986171	-0.0594811
LL0000008670	dao.3	ENSDARG00000035601.7	402994	9.88418	2.94848	1.97856	0	0	0	1	-4.76357
LL0000007185	CR926464.1	ENSDARG00000097943.2		3.95367	25.5535	20.7749	4.92069	9.9232	15.8046	0.817374	-0.714463
LL0000036346	XLOC_032110			181.869	261.432	211.706	111.208	106.178	85.9373	0.00176956	-1.11069
LL0000008262	CU856539.1	ENSDARG00000010023.8	557306	0.988418	13.7596	20.7749	23.6193	39.6928	48.4015	0.314624	1.65293
LL0000027968	si:dkey-83k24.5	ENSDARG00000093019.3	100321503	59.3051	42.2615	73.2068	52.1593	45.6467	64.206	0.948247	-0.109238
LL0000024481	sept9b	ENSDARG00000103900.2	541494	388.448	389.199	458.037	856.199	516.999	432.65	0.239337	0.547409
LL0000013540	larp6b	ENSDARG00000003968.8	565767	7.90735	5.89695	9.89281	7.8731	13.8925	22.7191	0.706512	0.908676
LL0000015747	LOC103909958		103909958	14.8263	26.5363	32.6463	23.6193	27.785	26.6702	0.974564	0.0770981
LL0000015463	LOC101887118		101887118	117.622	100.248	117.724	62.9848	99.232	133.351	0.893105	-0.183268
LL0000035232	XLOC_023770			7.90735	20.6393	1.97856	0	6.94624	3.95114	0.711775	-1.48685
LL0000024833	si:ch1073-358c10.1	ENSDARG00000055270.7	503993	32.6178	17.6909	36.6034	70.8579	45.6467	46.4259	0.360354	0.906912
LL0000011263	gfap	ENSDARG00000025301.9	30646	95.8766	256.517	259.192	50.191	134.956	203.484	0.58613	-0.654217
LL0000006094	cox11	ENSDARG00000061004.7	100005158	48.4325	47.1756	77.164	97.4296	75.4164	97.7907	0.39944	0.647635
LL0000031868	vldlr	ENSDARG00000006257.10	393897	536.711	549.4	645.012	398.576	581.5	628.231	0.897185	-0.10619
LL0000037424	XLOC_040575			0	10.8111	1.97856	2.95241	0	0	1	-2.11411
LL0000007493	CT025748.1	ENSDARG00000094576.2		13.8379	0	8.90353	8.85724	0	0	0.855946	-1.35972
LL0000008994	dlx2a	ENSDARG00000079964.4	30574	426.008	311.556	463.973	245.05	170.679	403.016	0.3791	-0.553341
LL0000020289	ngfrb	ENSDARG00000089223.4	564338	350.889	421.632	417.477	432.036	600.354	449.442	0.466809	0.316367
LL0000024345	sdha	ENSDARG00000016721.12	393884	736.372	627.043	688.54	694.801	737.294	753.68	0.86048	0.0911575
LL0000008509	cxxc4	ENSDARG00000077817.6	100006754	4.94209	20.6393	12.8607	12.7938	59.5392	40.4992	0.299229	1.55302
LL0000004274	CABZ01063602.1	ENSDARG00000102395.2	103909970	196.695	131.699	149.381	269.654	189.533	140.265	0.711006	0.327396
LL0000023863	rorab	ENSDARG00000001910.13	554722	145.298	72.7291	47.4855	118.096	96.2551	81.9862	0.930027	0.158513
LL0000030274	thg1l	ENSDARG00000038360.5	492814	42.502	26.5363	28.6892	67.9055	30.7619	56.3037	0.591848	0.665373
LL0000028113	si:dkeyp-117h8.4	ENSDARG00000043004.9	572032	313.329	367.577	419.455	273.59	323.496	290.409	0.483725	-0.310196
LL0000001690	aurkb	ENSDARG00000037640.7	791894	268.85	224.084	274.031	324.765	193.502	261.763	0.981939	0.0244764
LL0000037688	XLOC_042557			5.93051	17.6909	5.93569	15.7462	13.8925	24.6946	0.704214	0.877942
LL0000025663	si:ch211-225g23.1	ENSDARG00000091271.4	562197	413.159	371.508	409.563	422.195	391.967	398.077	0.974874	0.0216334
LL0000020268	nfkbib	ENSDARG00000030087.7	797834	430.95	336.126	326.463	347.4	287.773	304.238	0.699198	-0.219127
LL0000008033	CU469577.1	ENSDARG00000102850.2		8.89577	10.8111	14.8392	12.7938	20.8387	12.8412	0.878808	0.427791
LL0000037767	XLOC_042909			65.2356	72.7291	85.0782	61.0165	54.5776	53.3404	0.674876	-0.400802
LL0000027067	si:dkey-204l11.1	ENSDARG00000079403.4	100006301	5.93051	50.1241	65.2926	39.3655	55.5699	78.035	0.829128	0.51134
LL0000024597	sgms1	ENSDARG00000029621.10	566563	837.19	874.715	737.015	731.214	940.72	874.19	0.931827	0.0561147
LL0000001609	atp5if1b	ENSDARG00000044092.6	558368	11.861	20.6393	12.8607	29.5241	19.8464	0.987785	0.970416	0.150762
LL0000020144	ndufb9	ENSDARG00000041314.6	573021	265.885	168.063	117.724	208.637	161.748	86.9251	0.842949	-0.270606
LL0000039431	znf1049	ENSDARG00000098071.2		0	11.7939	6.92497	0	17.8618	14.8168	0.897936	0.803514
LL0000028345	si:rp71-36a1.1	ENSDARG00000095295.2	571927	27.6757	28.5019	13.8499	19.6827	4.9616	19.7557	0.781507	-0.657141
LL0000019827	myh7	ENSDARG00000079564.4	30616	142.332	53.0726	49.4641	26.5717	22.8234	50.377	0.184853	-1.29522
LL0000001951	bmp6	ENSDARG00000015686.7	503761	625.669	493.378	505.523	355.274	344.335	365.48	0.0130077	-0.60906
LL0000014659	LOC101883071			37.5599	0	0	0	0	29.6335	0.982201	-0.341909
LL0000024766	si:ch1073-143l10.2	ENSDARG00000094899.2	565165	16.8031	9.82826	10.8821	23.6193	21.831	32.5969	0.447433	1.05708
LL0000009795	errfi1a	ENSDARG00000104039.3	798009	292.572	434.409	449.134	322.797	500.129	612.427	0.704382	0.287343
LL0000023962	rps10	ENSDARG00000034897.10	394121	2229.87	1252.12	1516.57	2792	1595.65	1525.14	0.758688	0.242344
LL0000032017	wdr45	ENSDARG00000090219.4	393200	80.0619	66.8321	63.314	72.8262	47.6314	43.4625	0.764602	-0.358687
LL0000029018	smu1a	ENSDARG00000002538.8	393168	479.383	390.182	390.766	443.846	385.02	449.442	0.978641	0.0204744
LL0000038455	zgc:101583	ENSDARG00000026682.10	494104	173.962	124.819	103.875	131.874	75.4164	70.1327	0.530374	-0.537333
LL0000029420	ssbp3b	ENSDARG00000030155.9	406759	563.398	509.104	563.89	818.802	543.792	728.985	0.340711	0.354126
LL0000021445	pcnx3	ENSDARG00000019501.10	107992390	1988.7	2058.04	2091.34	1807.86	1993.57	1995.33	0.825961	-0.0825501
LL0000005107	ccdc88b	ENSDARG00000076189.4	100330741	23.722	22.605	50.4534	1313.82	855.38	549.208	6.5239e-27	4.81219
LL0000017521	LOC110438926		110438926	31.6294	14.7424	26.7106	26.5717	5.95392	15.8046	0.805455	-0.596145
LL0000010648	FP016005.1	ENSDARG00000104358.2	101884241	4.94209	10.8111	14.8392	3.93655	2.97696	5.92671	0.648478	-1.25237
LL0000011254	gem	ENSDARG00000029112.6	560566	1.97684	20.6393	11.8714	0.984137	7.93856	14.8168	0.911368	-0.539125
LL0000029425	ssh2b	ENSDARG00000098955.2	557912	592.063	534.657	484.748	778.453	733.325	419.809	0.694309	0.261412
LL0000010408	flt1	ENSDARG00000019371.12	544667	949.87	825.574	769.661	1658.27	1774.27	1999.28	8.75127e-11	1.09371
LL0000024047	rsad1	ENSDARG00000077698.4	565897	2.96526	12.7767	7.91425	22.6352	10.9155	5.92671	0.820847	0.738705
LL0000014705	LOC101883314		101883314	9.88418	2.94848	0.989281	5.90482	5.95392	7.90228	0.918353	0.515815
LL0000031155	trmt1l	ENSDARG00000042057.9	559583	63.2588	95.3341	108.821	155.494	94.2704	171.875	0.35331	0.656988
LL0000012114	hinfp	ENSDARG00000004851.10	406733	153.205	105.162	141.467	102.35	77.401	80.9984	0.289124	-0.616594
LL0000017670	LOC110439452		110439452	0	11.7939	4.94641	2.95241	0	10.8656	0.970046	-0.276852
LL0000023950	rpp25l	ENSDARG00000070131.4	436813	13.8379	19.6565	17.8071	8.85724	13.8925	5.92671	0.695079	-0.839421
LL0000018528	maff	ENSDARG00000028957.6	393307	302.456	543.503	487.716	347.4	583.484	427.711	0.981939	0.0266487
LL0000013300	kif20ba	ENSDARG00000071009.6	449979	1293.84	1200.03	1407.75	856.199	992.32	910.738	0.00750017	-0.499801
LL0000014278	LOC100535396		100535396	9.88418	5.89695	0	12.7938	8.93088	2.96335	0.904464	0.645584
LL0000004037	CABZ01024844.1	ENSDARG00000117513.1	110438450	5.93051	5.89695	5.93569	1.96827	0	8.89006	0.903837	-0.709863
LL0000031278	tstd2			152.216	139.561	102.885	245.05	243.119	190.643	0.0477845	0.782354
LL0000000180	acot17	ENSDARG00000088524.4	572757	1.97684	14.7424	8.90353	2.95241	1.98464	13.829	0.9277	-0.449418
LL0000009371	eda	ENSDARG00000074591.6	798740	26.6873	55.0382	28.6892	58.0641	84.3472	45.4381	0.482333	0.766371
LL0000007266	crabp2b	ENSDARG00000030449.6	503502	77.0966	114.008	92.0032	176.161	115.109	151.131	0.262377	0.644001
LL0000020523	NPFFR2	ENSDARG00000033635.8	560955	135.413	51.1069	52.4319	56.0958	58.5469	36.548	0.587034	-0.660312
LL0000018269	lonp1	ENSDARG00000102765.2	563257	160.124	206.393	235.449	310.003	315.558	226.203	0.287394	0.500765
LL0000006375	CR381673.2	ENSDARG00000103241.2	110437901	0	1.96565	0	27.5558	4.9616	0	0.348343	4.04609
LL0000017696	LOC110439488		110439488	0	0	11.8714	0	0	0	1	-4.44428
LL0000017000	LOC110437769		110437769	10.8726	5.89695	1.97856	7.8731	3.96928	0	0.912192	-0.662547
LL0000024863	si:ch1073-469d17.2	ENSDARG00000101485.2		0.988418	9.82826	38.582	10.8255	12.9002	42.4748	0.921465	0.422483
LL0000020795	oatx	ENSDARG00000019713.10	555218	0.988418	7.8626	9.89281	1.96827	0	0	1	-3.24911
LL0000012778	inpp5kb	ENSDARG00000078618.5	566188	0	1.96565	0	0.984137	17.8618	0	1	3.25924
LL0000030347	tjp3	ENSDARG00000002909.11	373089	156.17	271.26	186.974	75.7786	166.71	131.375	0.279574	-0.716835
LL0000024174	sall3b	ENSDARG00000057586.7	568041	80.0619	55.0382	84.0889	64.9531	54.5776	94.8274	0.984494	-0.0320284
LL0000007845	CU151886.1	ENSDARG00000117784.1		23.722	39.313	21.7642	8.85724	28.7773	21.7313	0.81547	-0.514817
LL0000005104	ccdc85cb	ENSDARG00000079555.4	436901	124.541	157.252	140.478	94.4772	153.81	138.29	0.914222	-0.127546
LL0000015279	LOC101886174		101886174	0	0	0	0	9.9232	0	1	4.18739
LL0000005109	ccdc9	ENSDARG00000004636.12	550140	273.792	214.256	191.921	264.733	254.034	232.129	0.861318	0.143162
LL0000003307	BX649355.1	ENSDARG00000098884.2	103910789	204.603	124.819	178.071	184.034	187.549	223.239	0.784556	0.229146
LL0000024079	rtn2a	ENSDARG00000016088.11	569502	210.533	237.844	108.821	55.1117	163.733	130.388	0.477067	-0.674143
LL0000014151	LOC100332699		100332699	102.796	94.3513	68.2604	21.651	66.4855	81.9862	0.604976	-0.641778
LL0000000198	acp7	ENSDARG00000102421.2	571830	100.819	90.42	56.389	72.8262	40.6851	42.4748	0.481237	-0.666635
LL0000015403	LOC101886860		101886860	18.7799	5.89695	0	3.93655	4.9616	4.93892	0.87185	-0.834646
LL0000025174	si:ch211-153j24.3	ENSDARG00000068428.8	564403	2.96526	36.3645	11.8714	11.8096	23.8157	7.90228	0.95371	-0.234659
LL0000014325	LOC100536348		100536348	66.224	46.1928	53.4212	75.7786	46.6391	49.3892	0.976344	0.0511967
LL0000000865	aldh1l1	ENSDARG00000077004.5	100526683	292.572	324.332	503.544	365.115	358.228	347.7	0.947473	-0.0650282
LL0000037289	XLOC_039760		101882501	74.1314	98.2826	108.821	84.6358	82.3626	100.754	0.957053	-0.0708731
LL0000023784	rnf165b	ENSDARG00000078817.5	572413	196.695	246.689	353.173	140.732	249.072	284.482	0.824363	-0.240451
LL0000014426	LOC100537963		100537963	71.1661	67.815	50.4534	47.2386	67.4778	76.0594	0.994851	0.010066
LL0000020422	nme7	ENSDARG00000056193.4	30086	96.865	60.9352	70.239	92.5089	39.6928	76.0594	0.942259	-0.130692
LL0000020406	nlrc8	ENSDARG00000092025.3	795668	0	9.82826	3.95713	14.7621	2.97696	2.96335	0.92188	0.586551
LL0000010147	fasn	ENSDARG00000087657.5	559001	0	0	0	61.0165	97.2474	11.8534	5.26864e-07	8.28717
LL0000035905	XLOC_029036			4.94209	7.8626	1.97856	9.84137	14.8848	6.91449	0.706512	1.09727
LL0000011667	gpsm2l	ENSDARG00000102026.2	449665	406.24	422.615	518.383	373.972	447.537	501.795	0.974601	-0.0258671
LL0000004953	cav1	ENSDARG00000103747.2	323695	1549.84	1313.06	1048.64	1183.92	935.758	896.909	0.286377	-0.374804
LL0000012692	ildr2	ENSDARG00000014180.11	564738	1613.1	1369.08	1295.96	930.01	1133.23	911.726	0.0171172	-0.524128
LL0000032936	XLOC_006319			42.502	46.1928	36.6034	22.6352	27.785	35.5603	0.676461	-0.543388
LL0000031133	triob	ENSDARG00000000370.10	368847	2259.52	2395.15	2532.56	1927.92	2327.98	2226.47	0.653246	-0.148926
LL0000025855	si:ch211-255f4.12		100006580	97.8534	0	0	0	0	124.461	1	0.347165
LL0000003999	CABZ01009512.2	ENSDARG00000104424.2	110437804	18.7799	76.6604	46.4962	41.3338	36.7159	36.548	0.886276	-0.308785
LL0000013610	lfng	ENSDARG00000037879.6	30158	2241.73	1609.87	1753.01	664.293	636.077	738.863	1.37219e-14	-1.45857
LL0000032064	whrna	ENSDARG00000075362.5	100334777	33.6062	45.21	27.6999	16.7303	28.7773	29.6335	0.759329	-0.50365
LL0000039007	zgc:173615	ENSDARG00000113780.1	100150682	96.865	66.8321	64.3033	53.1434	57.5546	30.6213	0.445055	-0.69009
LL0000011275	gfra1b	ENSDARG00000102564.2	79377	29.6526	21.6222	14.8392	14.7621	26.7927	22.7191	0.98859	-0.0408982
LL0000005923	cnp	ENSDARG00000070822.5	325896	495.198	414.752	432.316	1111.09	724.394	718.12	0.000632365	0.927905
LL0000000316	adcy6a	ENSDARG00000061445.8	570652	521.885	497.31	506.512	232.256	287.773	361.529	0.00455282	-0.791377
LL0000023075	rab42a	ENSDARG00000034215.5	406315	4.94209	10.8111	11.8714	12.7938	16.8694	24.6946	0.628982	0.976421
LL0000000435	afap1l1b	ENSDARG00000056453.8	768144	1773.22	1501.76	1648.14	943.788	834.541	824.8	7.33373e-09	-0.919298
LL0000012506	ifnphi3	ENSDARG00000070676.5	100126803	0.988418	17.6909	17.8071	3.93655	7.93856	8.89006	0.830402	-0.813428
LL0000006816	CR751602.1	ENSDARG00000094128.4	100537659	232.278	232.93	327.452	23.6193	16.8694	43.4625	3.21565e-13	-3.23889
LL0000008717	dclk1b	ENSDARG00000104664.2	100151759	126.518	169.046	175.103	174.192	259.988	276.58	0.229896	0.594593
LL0000038948	zgc:171775	ENSDARG00000058381.5	562552	66.224	192.634	149.381	67.9055	97.2474	116.559	0.615937	-0.535295
LL0000028256	si:dkeyp-75h12.5	ENSDARG00000089877.4	566718	57.3283	36.3645	71.2283	23.6193	90.3012	39.5114	0.96525	-0.104305
LL0000010767	FP236327.1	ENSDARG00000105402.2		0	9.82826	1.97856	0	0.99232	0	1	-3.475
LL0000013488	l1cama	ENSDARG00000007149.11	30634	60.2935	108.111	193.899	30.5083	96.2551	140.265	0.807216	-0.440245
LL0000018024	LOC110440088		110440088	8.89577	49.1413	8.90353	0	19.8464	20.7435	0.865534	-0.722088
LL0000028260	si:dkeyp-77c8.1	ENSDARG00000093940.2		33.6062	6.87978	6.92497	5.90482	5.95392	5.92671	0.547463	-1.41441
LL0000005720	ciz1a	ENSDARG00000089781.5	103911032	562.41	698.789	645.012	788.294	875.227	781.338	0.171296	0.359007
LL0000027383	si:dkey-256i11.2	ENSDARG00000093713.5		14.8263	17.6909	8.90353	13.7779	5.95392	16.7923	0.956867	-0.181413
LL0000039469	znf1089	ENSDARG00000114908.1	110439401	53.3746	24.5706	9.89281	4.92069	39.6928	29.6335	0.945335	-0.242695
LL0000003288	BX649307.1	ENSDARG00000096046.2		0	0	3.95713	30.5083	0	0	0.676733	2.94731
LL0000008826	dennd4a	ENSDARG00000062721.8	558211	842.132	1022.14	771.64	1094.36	994.305	873.202	0.727978	0.168189
LL0000006390	CR382300.2	ENSDARG00000100358.2		5.93051	2.94848	0	0	0	25.6824	0.836343	1.53229
LL0000023181	rap1gap2a	ENSDARG00000061551.7	561339	25.6989	71.7463	42.5391	52.1593	34.7312	51.3648	0.993181	-0.0180018
LL0000003979	CABZ01002188.1	ENSDARG00000100415.2		2.96526	0	0	24.6034	19.8464	23.7068	0.00629518	4.52403
LL0000012465	idh1	ENSDARG00000025375.11	100006589	396.356	389.199	271.063	692.833	390.974	355.603	0.473681	0.446046
LL0000008900	dhx15	ENSDARG00000015392.10	321931	1703.04	1306.18	1350.37	1870.84	1549.01	1708.87	0.496802	0.234429
LL0000018603	map3k20	ENSDARG00000074219.7	100126011	984.465	905.182	724.154	682.007	523.945	486.978	0.0251438	-0.626603
LL0000012346	hsd17b12b	ENSDARG00000035872.8	322626	82.0387	88.4543	100.907	139.747	116.101	102.73	0.573703	0.401931
LL0000025232	si:ch211-161h7.4	ENSDARG00000087238.5	569837	814.457	888.474	975.432	982.169	947.666	1006.55	0.74219	0.1327
LL0000010693	FP085398.1	ENSDARG00000087611.3	559789	1.97684	0.982826	17.8071	41.3338	19.8464	39.5114	0.190249	2.27819
LL0000005987	col15a1b	ENSDARG00000061848.8	558137	372.634	391.165	385.82	1118.96	836.526	793.191	3.81418e-09	1.2576
LL0000010796	FP245462.1	ENSDARG00000097001.2	101882175	26.6873	3.9313	4.94641	0	0	10.8656	0.72367	-1.71056
LL0000030977	traf4a	ENSDARG00000003963.9	404045	618.75	724.342	551.03	463.529	488.222	447.467	0.111183	-0.436952
LL0000021423	pcgf3		101884364	35.5831	39.313	64.3033	102.35	36.7159	16.7923	0.951254	0.16326
LL0000008737	dctn3	ENSDARG00000041363.7	431767	97.8534	115.973	106.842	160.414	74.424	99.7663	0.967159	0.0614843
LL0000017777	LOC110439602		110439602	9.88418	0	0.989281	2.95241	0	0	1	-1.87968
LL0000018855	megf10	ENSDARG00000017229.13	564571	0.988418	22.605	31.657	25.5876	11.9078	25.6824	0.960626	0.193499
LL0000040173	si:ch211-269c21.2	ENSDARG00000074560.3	795008	15.8147	22.605	31.657	34.4448	22.8234	16.7923	0.975062	0.0799197
LL0000014452	LOC100538336		100538336	27.6757	12.7767	14.8392	11.8096	31.7543	18.7679	0.95371	0.172775
LL0000002505	BX294178.1	ENSDARG00000101818.2	110439935	9.88418	1.96565	10.8821	0	10.9155	20.7435	0.9304	0.477974
LL0000040457	LOC100536609		100536609	2.96526	6.87978	3.95713	11.8096	1.98464	20.7435	0.665417	1.32317
LL0000029001	smox	ENSDARG00000036967.8	387290	614.796	597.558	650.947	482.227	483.26	488.954	0.133629	-0.357385
LL0000022719	prxl2b	ENSDARG00000029795.8	406605	27.6757	39.313	28.6892	31.4924	44.6544	21.7313	0.98859	0.0325878
LL0000031442	uba5	ENSDARG00000063588.9	386712	185.823	113.025	94.971	203.716	113.125	102.73	0.954465	0.0914754
LL0000029579	stom	ENSDARG00000003835.10	81534	2132.02	2021.67	2078.48	1635.64	1748.47	1881.73	0.250151	-0.243075
LL0000005532	cfl1	ENSDARG00000021124.8	321496	3401.15	2589.75	2549.38	5331.07	3176.42	2587.01	0.468178	0.377499
LL0000030084	tcf4	ENSDARG00000107408.2	100526651	1051.68	947.444	1087.22	307.051	471.352	577.854	1.80847e-05	-1.1863
LL0000026878	si:dkey-174n20.1	ENSDARG00000035579.6	796174	1.97684	11.7939	10.8821	5.90482	4.9616	4.93892	0.875434	-0.641408
LL0000040423	hist1h4l	ENSDARG00000110152.1	100331412	1367.97	926.805	789.447	1031.38	663.862	714.169	0.518407	-0.356201
LL0000005489	cers5	ENSDARG00000002365.7	323020	162.101	212.29	241.385	166.319	178.618	157.058	0.653434	-0.294753
LL0000021680	phactr4a	ENSDARG00000015552.13	569383	314.317	521.88	354.163	269.654	387.005	314.116	0.658071	-0.29428
LL0000031277	TSTD1	ENSDARG00000071567.6	563265	0.988418	5.89695	4.94641	40.3496	6.94624	21.7313	0.136191	2.54433
LL0000030364	tln1	ENSDARG00000100729.2	494453	9023.27	7798.72	8371.3	9468.38	7977.26	7058.71	0.945214	-0.0399968
LL0000010127	fancb	ENSDARG00000067596.5	108179053	45.4672	66.8321	90.0246	80.6993	101.217	71.1205	0.792136	0.322647
LL0000011681	gramd1ba	ENSDARG00000075383.7	568698	879.692	991.671	778.565	595.403	729.356	879.129	0.545917	-0.265934
LL0000024483	serbp1a	ENSDARG00000074242.5	335449	4966.8	3744.57	4338	6705.91	4737.34	5040.67	0.283499	0.337089
LL0000007249	CR936977.1	ENSDARG00000100144.2		3.95367	11.7939	20.7749	5.90482	4.9616	6.91449	0.712964	-1.03834
LL0000007248	CR936975.1	ENSDARG00000096862.2	100534937	15.8147	0	0	0	0.99232	0	1	-3.89632
LL0000005855	cmip	ENSDARG00000062933.6	561893	655.321	497.31	535.201	893.597	726.379	550.196	0.414961	0.362667
LL0000018761	mcfd2	ENSDARG00000039757.7	449676	149.251	177.891	132.564	197.812	177.625	150.143	0.822597	0.19316
LL0000030638	tmem63ba	ENSDARG00000104559.2	100334023	722.534	657.51	556.965	471.402	484.252	524.514	0.177461	-0.388081
LL0000024874	si:ch1073-80i24.3	ENSDARG00000097776.2		0	0	0.989281	7.8731	0	0	1	2.89219
LL0000001010	ankle2	ENSDARG00000035607.8	559297	273.792	281.088	288.87	345.432	276.857	232.129	0.984203	0.0181698
LL0000021100	osgep	ENSDARG00000045846.7	550447	50.4093	35.3817	37.5927	78.731	22.8234	56.3037	0.850787	0.35569
LL0000021540	pdk3a	ENSDARG00000014527.10	560068	262.919	289.934	293.817	237.177	201.441	305.226	0.797005	-0.186771
LL0000028636	slc25a55b	ENSDARG00000013749.6	445054	31.6294	7.8626	4.94641	12.7938	4.9616	0	0.721695	-1.32319
LL0000010418	fmnl2a	ENSDARG00000012586.13	100006456	2347.49	2820.71	2780.87	1951.54	2529.42	2581.08	0.680364	-0.170713
LL0000002169	BX004999.1	ENSDARG00000096792.3	103910262	0.988418	23.5878	32.6463	15.7462	36.7159	18.7679	0.935635	0.315771
LL0000012707	im:7140055	ENSDARG00000092181.3	100422734	77.0966	62.9008	44.5177	77.7468	57.5546	111.62	0.723053	0.420342
LL0000022445	ppp1r3cb	ENSDARG00000014554.8	393807	109.714	102.214	85.0782	108.255	77.401	74.0839	0.871	-0.193352
LL0000024949	si:ch211-114c12.2	ENSDARG00000028542.6	336578	1762.35	2051.16	2110.14	1651.38	2277.38	2292.65	0.914099	0.070741
LL0000033556	XLOC_011218			28.6641	0	0	0	6.94624	0	0.803923	-2.0454
LL0000038553	zgc:112356	ENSDARG00000036489.8	569875	710.673	436.375	478.812	543.244	479.291	501.795	0.91465	-0.092991
LL0000034394	XLOC_017111			20.7568	21.6222	17.8071	28.54	32.7466	38.5236	0.566345	0.729674
LL0000008326	CU928013.1	ENSDARG00000097884.3		74.1314	132.681	108.821	157.462	110.148	117.546	0.78191	0.287181
LL0000030314	timeless	ENSDARG00000078497.4	325855	964.696	841.299	819.125	1062.87	947.666	1200.16	0.325046	0.290518
LL0000031107	trim35-9	ENSDARG00000039108.9	541547	0	16.708	15.8285	7.8731	11.9078	8.89006	0.970396	-0.182647
LL0000005450	cep152	ENSDARG00000075725.5	565873	485.313	625.077	579.719	523.561	662.87	704.291	0.779982	0.161778
LL0000028452	skap1	ENSDARG00000001498.10	563784	3.95367	4.91413	22.7535	35.4289	32.7466	9.87785	0.540299	1.30384
LL0000033308	XLOC_009496			0.988418	0.982826	1.97856	6.88896	10.9155	9.87785	0.225288	2.80943
LL0000000318	adcy7	ENSDARG00000060070.8	568726	1304.71	1240.33	1220.77	810.929	651.955	609.463	4.56209e-06	-0.861662
LL0000030013	tbc1d32	ENSDARG00000041734.8	566474	160.124	155.286	141.467	139.747	165.718	151.131	0.999826	-0.000948622
LL0000021264	papss2b	ENSDARG00000056600.6	80939	468.51	473.722	539.158	2269.42	1405.13	926.542	6.87171e-07	1.63504
LL0000028241	si:dkeyp-72e1.9	ENSDARG00000103743.2	563388	37.5599	31.4504	52.4319	43.302	34.7312	39.5114	0.981187	-0.0468881
LL0000029024	smyd1a	ENSDARG00000009280.11	321245	174.95	134.647	89.0353	40.3496	58.5469	77.0472	0.0471517	-1.18003
LL0000009197	drd1b	ENSDARG00000038918.4	568126	20.7568	14.7424	14.8392	1.96827	4.9616	9.87785	0.402592	-1.58273
LL0000028101	si:dkeyp-110g5.4	ENSDARG00000092482.2	561637	11.861	5.89695	12.8607	25.5876	8.93088	19.7557	0.719198	0.826295
LL0000018271	lonrf1	ENSDARG00000075048.6	560773	263.908	203.445	271.063	392.671	328.458	471.173	0.0369537	0.691319
LL0000016904	LOC108191533		108191533	7.90735	66.8321	45.5069	22.6352	48.6237	39.5114	0.967933	-0.118623
LL0000038603	zgc:113314	ENSDARG00000069453.6	619272	11.861	17.6909	20.7749	7.8731	20.8387	17.7801	0.969836	-0.114595
LL0000001217	aqp7	ENSDARG00000026787.10	334529	325.19	339.075	450.123	114.16	80.378	95.8151	4.78939e-11	-1.94022
LL0000025126	si:ch211-149a19.3	ENSDARG00000079456.6	568118	6.91893	7.8626	0	23.6193	8.93088	1.97557	0.773067	1.22375
LL0000021676	phactr1	ENSDARG00000023916.8	100334776	154.193	162.166	223.578	90.5406	97.2474	105.693	0.0312674	-0.879508
LL0000019605	mrs2	ENSDARG00000062872.6	565251	110.703	92.3856	97.9389	124.985	99.232	114.583	0.870417	0.170635
LL0000001153	apbb1	ENSDARG00000076560.5	565164	1103.07	1222.64	1385.98	1187.85	1290.02	1236.71	0.999826	0.00111625
LL0000022838	ptgr2	ENSDARG00000070673.4	553234	42.502	62.9008	47.4855	75.7786	71.4471	61.2427	0.654599	0.447252
LL0000030445	tmem106a	ENSDARG00000045075.6	407612	139.367	101.231	65.2926	132.859	80.378	60.2549	0.924473	-0.161447
LL0000029450	ssuh2.4	ENSDARG00000054827.8	100038788	12.8494	18.6737	32.6463	39.3655	29.7696	21.7313	0.801049	0.502009
LL0000013149	kcnj19a	ENSDARG00000059747.7	569752	0.988418	16.708	14.8392	30.5083	23.8157	52.3526	0.292259	1.71297
LL0000013401	klhl29	ENSDARG00000087688.3	100537703	169.02	250.621	124.649	138.763	181.595	96.8029	0.692583	-0.383885
LL0000030352	tktb	ENSDARG00000006019.8	378713	992.372	617.214	632.151	2837.27	1814.95	1595.27	8.37934e-07	1.47868
LL0000039028	zgc:174224	ENSDARG00000093875.3	100126810	78.0851	6.87978	25.7213	55.1117	22.8234	32.5969	0.999826	-0.00179553
LL0000025532	si:ch211-210b2.2	ENSDARG00000009402.10	100535998	41.5136	66.8321	48.4748	12.7938	43.6621	50.377	0.744043	-0.553988
LL0000012914	itfg1	ENSDARG00000075584.5	100331534	187.799	200.496	128.607	160.414	179.61	165.948	0.977586	-0.0309151
LL0000027295	si:dkey-23c22.5	ENSDARG00000092892.3	798269	0	5.89695	0	8.85724	0	0	1	0.586749
LL0000000306	adck1	ENSDARG00000062561.7	100144553	81.0503	72.7291	37.5927	74.7944	75.4164	48.4015	0.976434	0.0535099
LL0000026732	si:dkey-13a3.5	ENSDARG00000098535.2	101887093	0	0	0	7.8731	0	0	1	3.85391
LL0000022689	prrc1	ENSDARG00000044304.6	474330	313.329	334.161	274.031	340.512	279.834	263.739	0.944921	-0.0598201
LL0000012734	impdh1b	ENSDARG00000029524.9	338306	336.062	336.126	385.82	776.484	507.076	638.109	0.00110679	0.861064
LL0000029528	stbd1	ENSDARG00000098408.2	792854	36.5715	39.313	86.0675	50.191	65.4931	45.4381	0.998292	-0.00737114
LL0000012008	hdr	ENSDARG00000004392.10	373093	3.95367	4.91413	4.94641	76.7627	41.6775	26.6702	0.000231026	3.39295
LL0000029125	snx8a	ENSDARG00000074842.6	555448	438.858	282.071	181.039	62.9848	40.6851	63.2182	4.87273e-08	-2.43406
LL0000020458	nol12	ENSDARG00000038027.7	393260	22.7336	27.5191	49.4641	62.9848	53.5853	86.9251	0.233224	1.02922
LL0000032090	wnt2bb	ENSDARG00000032234.7	556087	97.8534	214.256	146.414	85.6199	129.002	46.4259	0.337366	-0.812813
LL0000010600	foxj2	ENSDARG00000057680.6	558490	386.472	369.542	386.809	303.114	302.658	407.955	0.779038	-0.17292
LL0000004107	CABZ01041604.1	ENSDARG00000059854.5	797048	94.8882	57.9867	86.0675	33.4607	68.4701	66.1816	0.65213	-0.507313
LL0000009707	epha4a	ENSDARG00000054454.10	64271	2211.09	2480.65	3000.49	4086.14	4652	4293.9	1.35411e-05	0.760588
LL0000029069	snrnp35	ENSDARG00000099913.2	569999	52.3862	55.0382	65.2926	73.8103	46.6391	66.1816	0.945214	0.111923
LL0000013979	LOC100007791		100007791	0	25.5535	4.94641	0	0	2.96335	0.483698	-3.36351
LL0000012149	hk2	ENSDARG00000101482.3	406339	210.533	249.638	178.071	748.928	566.615	445.491	6.21795e-07	1.46422
LL0000038788	zgc:158316	ENSDARG00000101696.2	790929	84.0156	195.582	177.081	131.874	239.149	176.814	0.834229	0.262464
LL0000021242	pan2	ENSDARG00000074675.5	792831	443.8	402.959	497.609	468.449	454.483	489.941	0.914641	0.071744
LL0000021080	ormdl3	ENSDARG00000025555.8	450067	39.5367	62.9008	52.4319	57.08	42.6698	40.4992	0.935502	-0.143056
LL0000030154	tent2	ENSDARG00000099679.2	553626	141.344	131.699	137.51	155.494	180.602	155.082	0.700972	0.258654
LL0000034934	XLOC_021212			13.8379	27.5191	17.8071	8.85724	9.9232	11.8534	0.597572	-0.949772
LL0000005759	cldn12	ENSDARG00000003927.8	81593	299.491	286.985	346.249	340.512	234.188	240.032	0.783742	-0.195041
LL0000023232	rasl11a	ENSDARG00000046013.9	550538	403.275	393.13	476.834	450.735	397.92	399.065	0.968087	-0.0291598
LL0000010542	FO904898.2	ENSDARG00000090601.3		17.7915	6.87978	13.8499	1.96827	1.98464	13.829	0.726478	-1.11508
LL0000021461	pcsk9	ENSDARG00000074185.4	100150316	1.97684	18.6737	5.93569	1.96827	13.8925	19.7557	0.927652	0.421381
LL0000032819	XLOC_005179			28.6641	27.5191	11.8714	28.54	24.808	20.7435	0.961742	0.122539
LL0000000116	abr	ENSDARG00000095180.2	565190	113.668	77.6432	117.724	134.827	94.2704	104.705	0.932722	0.111383
LL0000008941	dip2a	ENSDARG00000078058.5	100332244	2619.31	2133.71	2414.84	1836.4	1760.38	1798.76	0.021073	-0.409763
LL0000038489	zgc:109744	ENSDARG00000070800.7	323832	197.684	218.187	170.156	310.003	165.718	222.252	0.772851	0.252255
LL0000009007	dmgdh	ENSDARG00000025703.8	100141496	534.734	488.464	425.391	509.783	562.646	462.283	0.90464	0.0832942
LL0000028993	smim7	ENSDARG00000074848.5	100093704	69.1893	75.6776	73.2068	85.6199	96.2551	61.2427	0.911166	0.156783
LL0000031304	ttc38	ENSDARG00000042188.9	553728	5.93051	57.0039	45.5069	27.5558	23.8157	12.8412	0.745654	-0.756041
LL0000040031	LOC110439863		110439863	0	0	0	108.255	0	0	1	20.976
LL0000002728	BX324213.1	ENSDARG00000093873.2	101886849	0	28.5019	0.989281	2.95241	0.99232	5.92671	0.761382	-1.57903
LL0000006368	CR381647.1	ENSDARG00000097211.2		1.97684	11.7939	9.89281	14.7621	21.831	12.8412	0.654726	1.06252
LL0000038475	zgc:103499	ENSDARG00000045785.8	494063	11.861	8.84543	13.8499	62.0006	36.7159	19.7557	0.0951316	1.77778
LL0000038230	xrcc6	ENSDARG00000071551.6	334488	576.248	373.474	462.984	442.862	374.105	405.98	0.731477	-0.208042
LL0000000084	abhd14a	ENSDARG00000058367.7	404598	158.147	126.785	115.746	142.7	91.2935	90.8762	0.748822	-0.302469
LL0000019851	myl9b	ENSDARG00000008030.11	406493	295.537	377.405	346.249	210.605	400.897	274.604	0.817768	-0.201965
LL0000039500	znf1121	ENSDARG00000112070.1	100536676	56.3398	64.8665	56.389	66.9213	25.8003	27.658	0.683431	-0.560786
LL0000027030	si:dkey-1c7.2	ENSDARG00000104859.2	101883506	0	0.982826	1.97856	20.6669	31.7543	11.8534	0.00585426	4.44008
LL0000025516	si:ch211-209a2.1	ENSDARG00000094097.3	100536508	45.4672	10.8111	6.92497	31.4924	33.7389	61.2427	0.58613	1.00088
LL0000001264	arhgap17a	ENSDARG00000020488.10	550254	663.229	679.133	690.518	497.973	611.269	467.222	0.207015	-0.366871
LL0000029208	sp100.3	ENSDARG00000090449.3	555649	3.95367	12.7767	12.8607	20.6669	21.831	13.829	0.659026	0.928513
LL0000008807	dedd1	ENSDARG00000002758.12	58125	1235.52	1451.63	1621.43	702.674	1294.98	1409.57	0.548501	-0.338638
LL0000017588	LOC110439343		110439343	0	6.87978	0	7.8731	4.9616	0.987785	1	1.00588
LL0000005851	cmbl	ENSDARG00000073786.4	100151256	77.0966	70.7634	100.907	60.0324	62.5162	84.9495	0.826895	-0.26164
LL0000017012	LOC110437788		110437788	15.8147	7.8626	0	0	7.93856	0	0.824011	-1.57722
LL0000010157	FAT4	ENSDARG00000105285.2	101882648	11392.5	12178.2	12237.4	13681.5	17007.4	16177	0.0218696	0.388247
LL0000012801	ints14	ENSDARG00000041429.7	327593	220.417	165.115	185.985	175.176	201.441	191.63	0.993122	-0.00826648
LL0000002843	BX510922.2	ENSDARG00000104798.2	101883936	64.2472	77.6432	58.3676	71.842	142.894	89.8884	0.467285	0.604987
LL0000014864	LOC101884172		101884172	132.448	73.7119	118.714	113.176	97.2474	113.595	0.999826	-0.0036726
LL0000001674	atxn10	ENSDARG00000008439.10	100034473	95.8766	133.664	94.971	83.6517	125.032	161.997	0.882866	0.191789
LL0000039547	znf1171	ENSDARG00000094242.2	100149708	74.1314	110.076	132.564	101.366	83.3549	174.838	0.904702	0.182814
LL0000004776	cacng6a	ENSDARG00000036457.9	100034580	35.5831	92.3856	26.7106	15.7462	24.808	10.8656	0.153674	-1.58921
LL0000031656	upp1	ENSDARG00000040869.10	503707	0	39.313	5.93569	34.4448	22.8234	28.6458	0.790461	0.924735
LL0000007330	crmp1	ENSDARG00000056742.6	553756	1.97684	7.8626	8.90353	10.8255	9.9232	7.90228	0.867505	0.612156
LL0000002998	BX537120.3	ENSDARG00000116369.1	100536928	0	0	16.8178	5.90482	16.8694	0	0.958269	0.437487
LL0000019485	mplkip	ENSDARG00000078986.4	100003564	198.672	115.973	137.51	135.811	140.91	157.058	0.960238	-0.0598091
LL0000004794	cadpsb	ENSDARG00000070567.6	100001129	18.7799	39.313	73.2068	5.90482	28.7773	47.4137	0.775201	-0.677571
LL0000029709	svbp	ENSDARG00000102305.2	798425	66.224	101.231	78.1532	142.7	97.2474	100.754	0.553644	0.472138
LL0000037039	XLOC_037648			38.5483	63.8837	20.7749	52.1593	50.6083	42.4748	0.910035	0.23719
LL0000018191	LOC571721		571721	0	12.7767	14.8392	7.8731	5.95392	1.97557	0.874337	-0.805323
LL0000031744	ust	ENSDARG00000006044.8	557218	387.46	379.371	396.702	248.987	316.55	282.507	0.136191	-0.456355
LL0000028730	slc37a2	ENSDARG00000023394.9	406287	551.537	656.528	567.848	590.482	507.076	487.966	0.737469	-0.1636
LL0000038431	zfyve26	ENSDARG00000040131.8	324565	533.746	588.713	576.751	472.386	403.874	348.688	0.0962425	-0.472121
LL0000039850	kif5bb	ENSDARG00000103394.2	334108	279.722	461.928	437.262	301.146	389.982	330.908	0.782713	-0.206068
LL0000019584	mrps18c	ENSDARG00000069624.5	569841	32.6178	36.3645	27.6999	83.6517	33.7389	20.7435	0.783742	0.51486
LL0000028210	si:dkeyp-53d3.6		100006266	35.5831	0	13.8499	0	0	0	0.0551698	-6.50234
LL0000039340	zmp:0000000906		100334082	5.93051	38.3302	9.89281	0.984137	19.8464	15.8046	0.892667	-0.564282
LL0000029713	svilc	ENSDARG00000017036.10	100006087	57.3283	101.231	71.2283	45.2703	87.3242	70.1327	0.913191	-0.18098
LL0000039209	zgc:66447	ENSDARG00000025577.10	326023	193.73	157.252	152.349	205.685	157.779	196.569	0.863639	0.154076
LL0000011639	GPR45	ENSDARG00000063357.4	795372	4.94209	2.94848	3.95713	13.7779	12.9002	10.8656	0.396213	1.6642
LL0000038805	zgc:158464	ENSDARG00000100342.3	791139	164.077	119.905	90.0246	94.4772	112.132	143.229	0.945335	-0.0964012
LL0000005286	cdc42bpaa	ENSDARG00000104283.2	567912	3086.83	3266.91	3441.71	2600.09	3307.4	3568.87	0.936527	-0.0477863
LL0000021571	PDZD4	ENSDARG00000090564.4	100001805	39.5367	94.3513	111.789	17.7145	73.4317	70.1327	0.713028	-0.60735
LL0000006879	CR762483.1	ENSDARG00000114454.1	101883994	10.8726	12.7767	6.92497	1.96827	2.97696	0	0.302419	-2.6288
LL0000008681	daw1	ENSDARG00000021462.11	556760	12.8494	4.91413	1.97856	0	0	0	1	-5.17819
LL0000005892	cnih4	ENSDARG00000087759.4	559388	618.75	673.236	511.459	592.451	592.415	436.601	0.809963	-0.153479
LL0000038255	yipf6	ENSDARG00000054433.6	415186	66.224	107.128	79.1425	77.7468	59.5392	68.1572	0.792136	-0.297528
LL0000039565	znf16l	ENSDARG00000105532.2	570544	334.085	164.132	254.245	194.859	112.132	244.971	0.611823	-0.446958
LL0000039399	znf1014	ENSDARG00000101562.2	100141333	230.301	207.376	196.867	229.304	222.28	227.191	0.904702	0.097222
LL0000003360	BX649499.1	ENSDARG00000092335.2		6.91893	4.91413	10.8821	0	0.99232	2.96335	0.433158	-2.52199
LL0000004768	cacng2a	ENSDARG00000032565.7	393614	0	7.8626	17.8071	0	7.93856	3.95114	0.854253	-1.11074
LL0000004667	CABZ01102039.1	ENSDARG00000076357.4		6.91893	4.91413	7.91425	19.6827	6.94624	5.92671	0.826553	0.721684
LL0000004669	CABZ01102115.1	ENSDARG00000099536.1	101885697	0.988418	11.7939	18.7963	17.7145	10.9155	22.7191	0.832675	0.701456
LL0000015570	LOC103909136		103909136	85.9924	189.685	231.492	128.922	167.702	241.02	0.957542	0.0841574
LL0000011697	grb2b	ENSDARG00000038059.7	406308	710.673	518.932	583.676	820.77	561.653	537.355	0.924601	0.0823867
LL0000025625	si:ch211-219a4.3	ENSDARG00000040445.8	791754	155.182	77.6432	100.907	127.938	95.2628	60.2549	0.873882	-0.235461
LL0000008269	CU861453.1	ENSDARG00000097192.2	110438003	23.722	35.3817	41.5498	34.4448	37.7082	34.5725	0.967159	0.0844708
LL0000010236	fbxw8	ENSDARG00000079089.4	100136859	96.865	136.613	112.778	168.287	83.3549	67.1694	0.944105	-0.119056
LL0000032136	wu:fc17b08	ENSDARG00000094249.2	556205	1148.54	938.598	1083.26	934.93	1137.2	1208.06	0.940102	0.0491123
LL0000019935	naa20	ENSDARG00000039493.6	541516	72.1545	70.7634	59.3569	91.5248	64.5008	49.3892	0.989192	0.0222896
LL0000004668	CABZ01102109.1	ENSDARG00000114226.1	101883341	0	5.89695	2.96784	6.88896	1.98464	13.829	0.764828	1.35632
LL0000004585	CABZ01086029.1	ENSDARG00000117419.1	110437884	14.8263	23.5878	23.7428	3.93655	8.93088	6.91449	0.255807	-1.65218
LL0000016631	LOC108183434		108183434	4.94209	9.82826	7.91425	7.8731	2.97696	7.90228	0.948247	-0.274469
LL0000019392	mmel1	ENSDARG00000105389.3	560703	132.448	101.231	56.389	159.43	117.094	151.131	0.493189	0.560068
LL0000008811	def8	ENSDARG00000068208.7	492523	188.788	385.268	333.388	223.399	275.865	261.763	0.771757	-0.25392
LL0000038027	XLOC_043697			0	8.84543	0	4.92069	5.95392	9.87785	0.835764	1.22946
LL0000040122	ptprsb	ENSDARG00000110940.1	100526672	166.054	340.058	487.716	260.796	350.289	337.822	0.962316	-0.0667417
LL0000000984	angptl2a	ENSDARG00000024030.9	569092	109.714	104.18	89.0353	76.7627	97.2474	84.9495	0.824368	-0.226346
LL0000017557	LOC110439299		110439299	0	16.708	8.90353	0.984137	0.99232	5.92671	0.713323	-1.6964
LL0000011385	glod4	ENSDARG00000042509.5	447874	13.8379	29.4848	17.8071	23.6193	11.9078	8.89006	0.862647	-0.460672
LL0000006920	CR788248.1	ENSDARG00000096053.3	101886909	7.90735	12.7767	22.7535	23.6193	8.93088	17.7801	0.947486	0.21278
LL0000008520	cyb5d2	ENSDARG00000061006.6	795950	29.6526	38.3302	12.8607	2.95241	19.8464	22.7191	0.732367	-0.829037
LL0000009157	dpf3	ENSDARG00000025309.10	562738	426.008	373.474	443.198	515.688	504.099	420.796	0.641157	0.213228
LL0000010417	fmnl1a	ENSDARG00000055713.8	557062	40.5252	42.2615	76.1747	2305.83	1339.63	821.837	4.02036e-28	4.8128
LL0000027787	si:dkey-5i16.5	ENSDARG00000116211.1		4.94209	28.5019	30.6677	35.4289	36.7159	8.89006	0.920256	0.337876
LL0000024055	rsph10b	ENSDARG00000051891.5	767792	45.4672	44.2272	32.6463	10.8255	27.785	21.7313	0.370878	-1.02001
LL0000029321	sprn2	ENSDARG00000057665.4	100006310	0.988418	0	2.96784	16.7303	11.9078	1.97557	0.317722	2.95318
LL0000012252	hoxb10a	ENSDARG00000011579.8	58056	59.3051	115.973	47.4855	55.1117	55.5699	31.6091	0.581565	-0.646808
LL0000038680	zgc:136892	ENSDARG00000069505.4	678612	22.7336	65.8493	45.5069	41.3338	22.8234	40.4992	0.857229	-0.357532
LL0000003767	BX936386.1	ENSDARG00000097166.3		1.97684	0	0	12.7938	0	0	1	2.69481
LL0000020086	ndel1a	ENSDARG00000010953.8	394244	51.3978	51.1069	59.3569	78.731	57.5546	40.4992	0.941963	0.127338
LL0000028881	slc9a2	ENSDARG00000058780.6	562904	50.4093	47.1756	11.8714	7.8731	17.8618	3.95114	0.19008	-1.88294
LL0000016347	LOC108179575		108179575	26.6873	78.626	63.314	51.1751	64.5008	58.2793	0.98246	0.0447356
LL0000022169	plrg1	ENSDARG00000037283.9	100004402	297.514	210.325	310.634	330.67	278.842	280.531	0.889715	0.121028
LL0000020085	nde1	ENSDARG00000103902.2	566146	543.63	446.203	543.116	538.323	532.876	487.966	0.971433	0.0244985
LL0000016496	LOC108181524		108181524	7.90735	21.6222	28.6892	10.8255	0	24.6946	0.86277	-0.71268
LL0000030426	tmed10	ENSDARG00000041391.4	326716	1303.72	1236.39	1286.07	1459.48	1252.31	1046.06	0.967692	-0.0259837
LL0000006628	CR450686.4	ENSDARG00000111190.1		0	0	0	7.8731	4.9616	0	1	4.55882
LL0000036955	XLOC_036754			3.95367	13.7596	15.8285	8.85724	10.9155	7.90228	0.942205	-0.277509
LL0000029331	spsb3a	ENSDARG00000077737.5	796171	274.78	197.548	201.813	229.304	205.41	257.812	0.968997	0.0388675
LL0000039358	zmp:0000001073	ENSDARG00000039500.8	100333421	18.7799	15.7252	5.93569	5.90482	9.9232	7.90228	0.78055	-0.769363
LL0000004516	CABZ01080375.1	ENSDARG00000102110.2		184.834	208.359	215.663	120.065	162.741	196.569	0.600257	-0.345006
[truncated: 22,732 more rows]

## Sheet: Nr2f2Pos-enr_RefGeneUTRs
V4_3Abbrev	ensdargID	Ens95avgVein	Ens95Nr2f2PosLgFC	Ens95Nr2f2padj	-log10 Ens95Nr2f2padj	Ens95 3pUTR length	NCBI ID	RefSeqAvgVein	RefSeqNr2f2posLgFC	RefSeqNr2f2Pospadj	-log10 RefSeqNr2f2Pospadj	RefSeq 3pUTR length	V4_3AvgVein	V4Nr2f2posLgFC	V4Nr2f2Pospadj	-log10 V4Nr2f2Pospadj	V4 3pUTR length	Ens95 diff	RefSeq dif	V4 dif
abca12	ENSDARG00000074749	944.587	-1.26254	0.200917	0.696983	763	558335	2561.35	-1.1285	0.221826	0.653988	763	936.583	-1.25523	0.0194117	1.71194	763	no	no	yes
abca4b	ENSDARG00000062661	33.9829	-3.22948	0.00169206	2.77158	345	555506	36.6204	-3.33781	0.000809275	3.0919	345	36.4734	-3.4689	0.000797235	3.09841	345	yes	yes	yes
abcc2	ENSDARG00000014031	244.602	-1.08065	0.00483994	2.31516	181	393561	244.262	-1.07914	0.00613171	2.21242	193	243.909	-1.0853	0.00792667	2.10091	197	yes	yes	yes
abcc6b.1	ENSDARG00000105403	15.8399	-1.68102	0.31896	0.496264	560	100002917	184.161	-1.69198	0.000386265	3.41311	258	12.4825	-1.92496	0.527833	0.277503	560	no	yes	no
abcc6b.2	ENSDARG00000094901	159.747	-1.73116	0.00135555	2.86788	248	100002917	184.161	-1.69198	0.000386265	3.41311	848	190.827	-1.63035	0.00918945	2.03671	1531	yes	yes	yes
abcc9	ENSDARG00000015985	418.549	-2.10575	0.000151163	3.82055	36	561160	549.206	-2.16342	3.98725e-05	4.39933	36	547.27	-2.15036	7.44486e-05	4.12814	36	yes	yes	yes
abi3bpb	ENSDARG00000071095	880.481	-1.37415	5.41446e-11	10.2664	1342	100149890	884.694	-1.37595	5.04158e-11	10.2974	1166	881.979	-1.367	2.06206e-11	10.6857	1342	yes	yes	yes
ablim3	ENSDARG00000088168	303.937	-1.65446	7.69894e-06	5.11357	1414	566821	305.218	-1.73166	3.47287e-06	5.45931	1419	319.94	-1.67579	8.2977e-06	5.08104	1420	yes	yes	yes
actc1a	ENSDARG00000042535	784.462	-1.00057	0.0272277	1.56499	401	408256	244.115	-0.675973	0.425455	0.371147	106	278.341	-0.710539	0.295004	0.530173	401	yes	no	no
actn3a	ENSDARG00000013755	1058.35	-1.08155	0.0239679	1.62037	361	58037	1044.88	-1.07306	0.0261583	1.58239	356	1053.86	-1.08103	0.033621	1.47339	361	yes	yes	yes
adam12	ENSDARG00000079068	1195.08	-1.3745	1.56304e-13	12.806	1382	563275	1361.66	-0.926029	8.33003e-07	6.07935	1219	1274.06	-1.35211	1.80164e-15	14.7443	3545	yes	no	yes
adam15	ENSDARG00000089213	918.497	-1.55666	1.40748e-12	11.8516	3806	795199	679.509	-1.55997	1.48571e-10	9.82807	1146	1215.78	-1.49854	5.24424e-12	11.2803	6580	yes	yes	yes
adamts2	ENSDARG00000075930	123.074	-1.45793	0.00480869	2.31797	4079	571682	126.359	-1.51786	0.00314479	2.50241	3772	125.87	-1.52289	0.00416936	2.37993	3772	yes	yes	yes
adgrf6	ENSDARG00000091757	45.8565	-1.53612	0.215103	0.667354	1215	565101	380.408	-1.09448	0.0390429	1.40846	1134	307.305	-1.02495	0.0813681	1.08955	1215	no	yes	no
adgrl4	ENSDARG00000013653	905.376	-1.11918	7.36817e-07	6.13264	293	406676	898.086	-1.12289	1.20576e-06	5.91874	257	900.972	-1.11471	1.12049e-06	5.95059	293	yes	yes	yes
adra1d	ENSDARG00000024101	844.247	-1.78608	2.0757e-17	16.6828	3845	568614	791.735	-1.7758	3.2378e-15	14.4897	3103	839.517	-1.779	7.60139e-17	16.1191	3845	yes	yes	yes
afap1l1a	ENSDARG00000089162	415.504	-1.02677	0.000135197	3.86903	636	566757	430.329	-1.05244	6.55575e-05	4.18338	636	428.239	-1.04703	7.43242e-05	4.12887	636	yes	yes	yes
ak5l	ENSDARG00000017739	37.6211	-1.37575	0.119662	0.922042	363	548336	37.2862	-1.33097	0.149582	0.825119	345	52.9326	-1.60028	0.027781	1.55625	5360	no	no	yes
amdhd2	ENSDARG00000100376	130.041	-1.33961	0.0227799	1.64245	2218	402981	125.755	-1.31986	0.0352933	1.45231	719	129.974	-1.34969	0.041719	1.37967	2218	yes	yes	yes
anks1ab	ENSDARG00000078901	206.288	-1.9245	1.77173e-06	5.7516	1564	100003659	302.64	-1.70977	3.48982e-08	7.4572	3110	301.357	-1.70756	9.28184e-08	7.03237	3110	yes	yes	yes
ano3	ENSDARG00000058015	136.635	-1.15667	0.0702677	1.15324	2541	553392	136.621	-1.15695	0.0796578	1.09877	2532	170.384	-1.14333	0.0246576	1.60805	2673	no	no	yes
anos1b	ENSDARG00000004932	757.042	-1.78628	5.06066e-05	4.29579	2427	30652	786.593	-1.80145	3.68668e-05	4.43336	2427	750.605	-1.79135	0.000101802	3.99224	2427	yes	yes	yes
anxa13l	ENSDARG00000013613	99.3582	-1.5502	0.00199162	2.70079	614	554118	85.164	-1.46027	0.0151597	1.81931	614	99.0735	-1.54618	0.00392974	2.40564	667	yes	yes	yes
anxa1b	ENSDARG00000100095	177.174	-1.42009	0.045463	1.34234	623	353358	174.853	-1.43785	0.0538664	1.26868	623	175.782	-1.42131	0.0672068	1.17259	623	yes	no	no
anxa2a	ENSDARG00000003216	359.005	-1.35469	0.00190017	2.72121	402	325557	357.307	-1.37911	0.00210609	2.67652	341	355.935	-1.34578	0.00297938	2.52587	402	yes	yes	yes
ap1b1	ENSDARG00000020621	2096.09	-1.33237	1.29219e-16	15.8887	1463	562166	2045.21	-1.32633	2.55576e-14	13.5925	1465	2093.19	-1.31208	8.94861e-15	14.0482	1465	yes	yes	yes
ap1s3b	ENSDARG00000027966	110.56	-2.48348	4.90046e-07	6.30976	514	447897	110.557	-2.48397	8.79954e-07	6.05554	514	109.862	-2.5248	2.35605e-06	5.62781	514	yes	yes	yes
aplnra	ENSDARG00000002172	1146.6	-2.1428	2.9268e-12	11.5336	461	561935	1053.9	-2.08914	4.84351e-11	10.3148	240	1142.12	-2.1383	2.41996e-11	10.6162	461	yes	yes	yes
aplnrb	ENSDARG00000036670	1358.82	-1.8268	7.52242e-17	16.1236	941	565492	1357.79	-1.82623	1.02369e-16	15.9898	938	1351.9	-1.81897	1.41934e-15	14.8479	941	yes	yes	yes
aplp2	ENSDARG00000054864	4984.95	-1.12189	4.52811e-15	14.3441	2890	796801	4982.82	-1.12137	2.80305e-15	14.5524	2890	4961.88	-1.11582	1.53637e-15	14.8135	2890	yes	yes	yes
apobb.1	ENSDARG00000022767	251.872	-1.135	0.0459503	1.33771	1392	321166	252.546	-1.09441	0.0668504	1.1749	306	251.873	-1.09444	0.0856385	1.06733	1392	yes	no	no
apoeb	ENSDARG00000040295	1035.54	-1.44369	9.45579e-07	6.0243	476	30314	1034.18	-1.44481	1.15039e-06	5.93916	607	1029.87	-1.43385	3.05933e-06	5.51437	607	yes	yes	yes
aqp7	ENSDARG00000026787	299.692	-1.99011	1.15878e-12	11.936	1450	334529	318.811	-1.89119	2.21404e-11	10.6548	1586	371.463	-1.94022	4.78939e-11	10.3197	2449	yes	yes	yes
arap3	ENSDARG00000076801	3809.93	-1.00673	5.66218e-11	10.247	3023	558931	3785.39	-0.992681	8.97976e-11	10.0467	3025	3805.62	-0.992256	6.88987e-11	10.1618	3119	yes	no	no
arhgap27l	ENSDARG00000061798	1111.86	-1.0301	1.97359e-07	6.70474	1407	566523	1203.19	-1.00883	1.44252e-07	6.84088	1173	1204.76	-0.997474	1.93821e-07	6.7126	1407	yes	yes	no
arl4aa	ENSDARG00000099918	178.217	-1.0629	0.0104148	1.98235	280	393834	175.246	-1.08453	0.0150176	1.8234	280	177.306	-1.0609	0.0189403	1.72261	280	yes	yes	yes
arl4ab	ENSDARG00000033182	320.491	-1.39872	8.93371e-07	6.04897	1019	338267	320.148	-1.39773	1.39492e-06	5.85545	1019	318.84	-1.3921	4.12428e-06	5.38465	1019	yes	yes	yes
aspn	ENSDARG00000002192	235.679	-2.32267	3.40235e-07	6.46822	676	65228	236.651	-2.31897	5.4187e-07	6.2661	676	234.316	-2.32331	1.0366e-06	5.98439	676	yes	yes	yes
atp1a1a.4	ENSDARG00000001870	411.848	-1.88549	0.153695	0.813341	96	64615	405.568	-1.88092	0.146676	0.83364	96	409.752	-1.89207	0.00948512	2.02296	96	no	no	yes
atp1b4	ENSDARG00000053262	339.605	-2.3728	4.07903e-12	11.3894	1034	100037383	338.911	-2.36309	6.42768e-12	11.1919	1034	337.128	-2.36926	1.46556e-11	10.834	1034	yes	yes	yes
avpr2ab	ENSDARG00000029219	13.5349	-2.03842	0.360053	0.443634	1	100151502	27.7216	-2.003	0.304602	0.516268	556	67.7671	-2.09885	0.0168774	1.77269	6188	no	no	yes
b3gnt7	ENSDARG00000038489	189.443	-1.29691	0.000232311	3.63393	830	286748	188.778	-1.29232	0.000346478	3.46032	824	327.963	-1.45989	1.64171e-08	7.7847	3343	yes	yes	yes
b4galt5	ENSDARG00000037815	716.797	-0.905375	0.00171233	2.76641	201	724080	552.437	-1.00519	0.000330174	3.48126	4	727.835	-0.907744	0.00281148	2.55107	673	no	yes	no
bcl3	ENSDARG00000087832	81.8576	-2.8267	0.000117079	3.93152	528	565656	85.4768	-2.69689	0.000340762	3.46755	1163	85.2148	-2.73013	0.000421214	3.3755	1268	yes	yes	yes
bcl6b	ENSDARG00000069335	2055.33	-1.23368	1.47486e-12	11.8312	1629	793278	2086.63	-1.23656	2.40098e-12	11.6196	1633	2045.44	-1.22863	3.61946e-12	11.4414	1633	yes	yes	yes
bmp4	ENSDARG00000019995	749.15	-1.10288	7.75553e-05	4.11039	1426	30612	736.592	-1.10096	0.000101751	3.99246	1426	744.648	-1.09485	0.000176138	3.75415	1426	yes	yes	yes
bnc2	ENSDARG00000069989	3295.39	-1.17773	2.06526e-19	18.685	4037	559327	2784.99	-1.19652	4.68501e-18	17.3293	42	3287.69	-1.17188	5.49027e-22	21.2604	4037	yes	yes	yes
BX000534.1	ENSDARG00000095072	1405.7	-2.04159	0.0351787	1.45372	230	100537665	36.9888	-21.2774	1	0	300					230	yes	no	no
c1qtnf6a	ENSDARG00000055175	308.582	-2.13042	1.13106e-07	6.94651	107	565113	482.872	-2.2283	7.40132e-09	8.13069	1333	1179.75	-2.20748	3.7264e-13	12.4287	107	yes	yes	yes
CABZ01029422.1	ENSDARG00000116438	528.065	-1.2076	8.45118e-09	8.07308	1697	100333071	492.389	-1.18623	7.19753e-08	7.14282	270	525.01	-1.19535	6.11582e-09	8.21355	1697	yes	yes	yes
cacna2d2a	ENSDARG00000103390	58.0868	-1.81808	0.0328274	1.48376	255	541376	105.949	-1.65713	0.00165518	2.78116	255	115.158	-1.39393	0.00432067	2.36445	255	yes	yes	yes
calcrla	ENSDARG00000011473	1002.96	-1.14484	1.46196e-08	7.83506	58	445508	997.302	-1.16146	5.73063e-09	8.2418	58	1136.71	-1.06419	3.48056e-08	7.45835	1730	yes	yes	yes
cald1b	ENSDARG00000086391	72.943	-2.66126	0.000464188	3.33331	533	563892	79.5265	-2.4559	0.00264671	2.57729	536	85.503	-2.4345	0.00183175	2.73713	602	yes	yes	yes
capn1a	ENSDARG00000052702	111.866	-1.01531	0.0362923	1.44019	2366	393417	109.218	-0.922346	0.0850765	1.07019	746	112.107	-0.919258	0.0893987	1.04867	2366	yes	no	no
capn9	ENSDARG00000012341	295.962	-1.29174	0.0105998	1.9747	507	445107	277.795	-1.29831	0.0142991	1.84469	507	293.457	-1.28247	0.0180933	1.74248	507	yes	yes	yes
casq1b	ENSDARG00000018105	97.3673	-1.60681	0.0200806	1.69722	809	767757	97.3697	-1.60726	0.0237811	1.62377	429	97.4008	-1.63709	0.0286373	1.54307	809	yes	yes	yes
casq2	ENSDARG00000008982	567.974	-1.30424	0.00136643	2.86441	1325	114410	554.419	-1.33326	0.000932653	3.03028	1321	564.737	-1.30135	0.0021974	2.65809	1325	yes	yes	yes
cavin2a	ENSDARG00000027611	343.21	-1.20104	0.00406343	2.39111	3274	402824	337.234	-1.19538	0.00523725	2.2809	537	340.658	-1.19347	0.00592336	2.22743	3274	yes	yes	yes
cavin4a	ENSDARG00000038658	69.6179	-2.13787	0.00669058	2.17454	198	552940	69.6153	-2.13828	0.00830561	2.08063	198	69.3391	-2.19425	0.00947106	2.0236	198	yes	yes	yes
ccdc28a	ENSDARG00000091471					4688	326808	51.15	0.0332704	0.989663	0.00451277	587	180.305	-1.29675	0.00340096	2.4684	587	no	no	yes
ccdc80l1	ENSDARG00000030975	1202.61	-1.13015	3.00224e-08	7.52255	880	569128	1185.66	-1.11974	3.18394e-08	7.49704	100	1268.77	-1.117	1.12504e-08	7.94883	2957	yes	yes	yes
ccdc85al	ENSDARG00000005343	116.177	-1.89189	4.52822e-05	4.34407	1154	447831	114.517	-2.06655	6.16186e-06	5.21029	1154	120.399	-1.97541	4.10199e-05	4.38701	1154	yes	yes	yes
ccl25b	ENSDARG00000070873	416.494	-1.13941	1.80133e-05	4.74441	3044	795788	409.196	-1.14236	1.83244e-05	4.73697	413	413.744	-1.12552	5.94229e-05	4.22605	3044	yes	yes	yes
ccm2l	ENSDARG00000063089	267.348	-1.46488	0.000162506	3.78913	3472	568661	338.661	-1.69785	3.43995e-06	5.46345	580	340.602	-1.67861	8.89414e-06	5.0509	3472	yes	yes	yes
cd99	ENSDARG00000051975	587.762	-1.4135	1.00685e-06	5.99703	3294	559896	558.368	-1.3486	3.28814e-06	5.48305	1091	601.195	-1.36785	5.28965e-06	5.27657	3294	yes	yes	yes
cdc42ep2	ENSDARG00000053959	69.3075	-1.11739	0.116745	0.93276	229	541404	414.857	-1.06272	1.63309e-05	4.78699	5785	412.898	-1.06043	1.88979e-05	4.72359	5785	no	yes	yes
cdh27	ENSDARG00000055093	314.443	-1.2475	0.0160701	1.79398	62	101882839	309.124	-1.34299	0.0157082	1.80387	59	312.834	-1.24262	0.0245035	1.61077	488	yes	yes	yes
celsr1a	ENSDARG00000069185	3298.42	-1.43507	9.76793e-21	20.0102	2625	368436	3397.19	-1.43591	7.55387e-22	21.1218	1026	3385.82	-1.43198	1.48507e-23	22.8283	2625	yes	yes	yes
cemip	ENSDARG00000039881	1182.86	-1.08629	1.22629e-10	9.91141	2859	100003660	1181.49	-1.08513	1.20547e-10	9.91885	2681	1175.7	-1.07941	6.41089e-11	10.1931	2859	yes	yes	yes
cfap58	ENSDARG00000069435	91.4142	-3.07246	5.13241e-07	6.28968	202	561732	91.4109	-3.07301	9.83237e-07	6.00734	202	91.0988	-3.11266	2.52864e-06	5.59711	202	yes	yes	yes
chl1a	ENSDARG00000077881	416.124	-1.24189	0.00103805	2.98378	4445	566148	411.784	-1.25729	0.000935709	3.02886	3401	416.873	-1.24421	0.00127955	2.89294	4445	yes	yes	yes
chmp2ba	ENSDARG00000068683	8.25289	-5.50455	0.0454522	1.34244	12	569532	8.25262	-5.50502	0.0536697	1.27027	12	19.417	-0.795059	0.714498	0.145999	6011	yes	no	no
cilp	ENSDARG00000053362	752.748	-1.43987	0.000486295	3.3131	421	553329	755.593	-1.43721	0.000623408	3.20523	423	749.952	-1.43617	0.000740393	3.13054	423	yes	yes	yes
ckba	ENSDARG00000069752	331.002	-1.31491	0.000477019	3.32146	753	564694	350.134	-1.30994	0.000438242	3.35829	743	343.987	-1.32443	0.000740393	3.13054	753	yes	yes	yes
clcn1b	ENSDARG00000012269	23.4334	-3.83001	0.00171509	2.76571	921	567478	21.1204	-3.68053	0.00571331	2.24311	203	23.3569	-4.14877	0.00421312	2.3754	1228	yes	yes	yes
cldn11a	ENSDARG00000020031	2934.45	-2.13428	6.11215e-26	25.2138	475	436897	2927.08	-2.13185	8.75125e-26	25.0579	475	2918.79	-2.1282	3.9368e-26	25.4049	475	yes	yes	yes
cln8	ENSDARG00000075525	123.424	-1.00244	0.023012	1.63805	643	100136870	122.434	-0.960836	0.0342027	1.46594	408	252.912	-0.940953	0.00149141	2.8264	643	yes	no	no
cmtm8b	ENSDARG00000063162	55.7784	-2.15599	0.00174502	2.7582	1760	791163	55.7795	-2.11909	0.00275876	2.55929	1761	55.6047	-2.15129	0.00338798	2.47006	1760	yes	yes	yes
col17a1a	ENSDARG00000069415	480.088	-1.99338	0.000126955	3.89635	342	557257	561.151	-1.89217	0.000372382	3.42901	941	475.145	-1.98496	0.000273101	3.56368	342	yes	yes	yes
col17a1b	ENSDARG00000079011	95.3767	-1.54797	0.00160054	2.79573	427	568794	92.4003	-1.54717	0.00210563	2.67662	435	95.0481	-1.543	0.00257692	2.5889	435	yes	yes	yes
col18a1a	ENSDARG00000036558	6742.67	-1.05461	5.95673e-07	6.22499	1346	564123	6750.27	-1.05233	6.22821e-07	6.20564	1346	6719.36	-1.04645	3.35937e-07	6.47374	1355	yes	yes	yes
col18a1b	ENSDARG00000095901	983.588	-1.99535	3.86979e-14	13.4123	856	100334893	1240.71	-2.06598	2.20141e-16	15.6573	816	1214.9	-2.04016	6.13262e-15	14.2124	856	yes	yes	yes
col5a3b	ENSDARG00000101816	2192.14	-1.99341	1.52437e-08	7.81691	389	100463515	2299.03	-1.94964	9.45989e-08	7.02411	389	2173.27	-1.98614	2.33574e-08	7.63158	389	yes	yes	yes
col7a1	ENSDARG00000021720	986.643	-1.77808	0.0300642	1.52195	1456	100332562	1008.59	-1.77112	0.000140964	3.85089	793	1002.5	-1.76929	0.00019364	3.71301	1456	yes	yes	yes
cplx2	ENSDARG00000061918	112.881	-1.01966	0.0258818	1.58701	5206	556701	110.238	-1.28857	0.00819056	2.08669	5211	146.415	0.584654	0.195758	0.70828	5808	yes	yes	no
cpn1	ENSDARG00000005185	4522.7	-1.24439	1.1964e-09	8.92213	387	337172	4275.87	-1.23855	9.44893e-10	9.02462	387	4503.76	-1.23888	3.93632e-09	8.40491	387	yes	yes	yes
cpn1	ENSDARG00000096728	4522.7	-1.24439	1.1964e-09	8.92213	222	337172	4275.87	-1.23855	9.44893e-10	9.02462	387	4503.76	-1.23888	3.93632e-09	8.40491	387	yes	yes	yes
CR382383.2	ENSDARG00000099586	83.8206	-3.5989	1.37314e-09	8.86229	1820	100535654	46.8617	-3.69374	0.00014456	3.83995	373	52.9263	-3.62838	0.000101802	3.99224	1820	yes	yes	yes
CR855311.5	ENSDARG00000111795	3.96117	-4.44557	1	0	1282	560647	25.7431	-3.96752	0.0143464	1.84326	180	3.9521	-4.44249	1	0	1282	no	yes	no
cremb	ENSDARG00000102899	42.8966	-2.56596	0.0459503	1.33771	909	550357	80.5044	-1.2894	0.074498	1.12786	909	79.8808	-1.29258	0.0920374	1.03604	909	yes	no	no
crispld1a	ENSDARG00000077275	59.0702	-1.73073	0.0356748	1.44764	811	100149104	83.1695	-1.79044	0.00108163	2.96592	534	138.458	-1.89497	0.000178146	3.74922	4803	yes	yes	yes
CU695215.2	ENSDARG00000102003	27.3896	-5.37792	8.51685e-05	4.06972	1832	103909278	27.0595	-5.36091	0.000136152	3.86598	909	25.3179	-6.16032	0.000104204	3.98212	1832	yes	yes	yes
CU927890.1	ENSDARG00000107130	5930.5	-1.75034	7.78812e-37	36.1086	418	101883074	6142.52	-1.7577	2.58237e-37	36.588	469	4064.63	-1.71602	3.6686e-29	28.4355	469	yes	yes	yes
cxcl20	ENSDARG00000075163	98.3387	-1.63685	0.00131672	2.88051	1415	567537	98.3337	-1.6224	0.00205685	2.6868	343	97.9823	-1.63256	0.00298708	2.52475	1415	yes	yes	yes
cygb1	ENSDARG00000099371	1164.73	-2.17701	6.13494e-16	15.2122	6031	246090	1152.21	-2.16753	2.76326e-15	14.5586	4567	1159.44	-2.16923	2.61551e-14	13.5824	6031	yes	yes	yes
cyp1c1	ENSDARG00000101195	850.163	-1.10248	2.21592e-09	8.65445	1254	553637	843.504	-1.09769	3.04548e-09	8.51634	1255	839.07	-1.08997	6.43567e-09	8.19141	1254	yes	yes	yes
cyp26c1	ENSDARG00000056029	1669.51	-1.74686	2.47798e-07	6.6059	2158	554036	1660.42	-1.74038	3.136e-07	6.50362	2158	1657.21	-1.74151	4.12855e-07	6.3842	2158	yes	yes	yes
cyp2r1	ENSDARG00000056587	63.3559	-1.39801	0.046883	1.32898	796	563369	68.9578	-1.48181	0.0374233	1.42686	806	63.1157	-1.37252	0.0634319	1.19769	902	yes	yes	no
cysltr1	ENSDARG00000058246	110.886	-3.10977	1.64328e-06	5.78429	458	553675	110.894	-3.18626	2.37538e-06	5.62427	458	110.525	-3.14186	5.1452e-06	5.2886	458	yes	yes	yes
cyth3a	ENSDARG00000007807	468.315	-1.29622	3.07831e-05	4.51169	1801	100002190	452.135	-1.25848	3.56924e-05	4.44742	1605	467.758	-1.29366	8.04154e-05	4.09466	2138	yes	yes	yes
dab2	ENSDARG00000031761	3869.3	-2.93244	2.78074e-21	20.5558	369	404040	3912.45	-2.9387	2.87733e-21	20.541	369	3901.98	-2.93423	6.72539e-20	19.1723	369	yes	yes	yes
dap1b	ENSDARG00000086842	86.4736	-1.24146	0.0138355	1.859	356	58094	70.6334	-1.45938	0.0108783	1.96344	363	104.627	-1.1516	0.0192748	1.71501	363	yes	yes	yes
dhrs13a.2	ENSDARG00000111240	35.3027	-2.28499	0.0476356	1.32207	51	447903	35.3011	-2.28544	0.0552446	1.25771	66	35.1569	-2.27796	0.0696458	1.1571	51	yes	no	no
doc2b	ENSDARG00000088293	189.449	-2.34704	5.05215e-10	9.29652	169	100006713	259.397	-1.69665	3.511e-06	5.45457	2402	188.503	-2.36646	1.97014e-09	8.7055	169	yes	yes	yes
dsc2l	ENSDARG00000039677	1741.56	-1.03493	1.80457e-10	9.74363	1882	560091	1635.21	-1.01323	5.56591e-10	9.25446	460	1731.77	-1.02862	5.29746e-11	10.2759	1882	yes	yes	yes
DSG2	ENSDARG00000062750	563.507	-1.54304	0.00306582	2.51345	3025	100534918	478.639	-1.46908	0.00781349	2.10716	1025	558.104	-1.53521	0.00503533	2.29797	3025	yes	yes	yes
ecscr	ENSDARG00000087457	414.886	-1.1615	8.7077e-06	5.0601	340	550161	457.801	-1.20263	7.76012e-06	5.11013	388	554.426	-1.21339	1.07736e-06	5.96764	2324	yes	yes	yes
efna5a	ENSDARG00000089790	876.9	-1.00593	0.000217886	3.66177	3973	64256	1582.41	-0.977225	7.48051e-05	4.12607	3974	1578.88	-0.974629	5.4778e-05	4.26139	3974	yes	no	no
egfl7	ENSDARG00000100657	1609.62	-1.32828	3.08539e-19	18.5107	269	678640	1737.57	-1.34446	8.12113e-21	20.0904	270	1729.02	-1.33705	6.40656e-21	20.1934	270	yes	yes	yes
egln1a	ENSDARG00000038996	101.642	-1.04989	0.0570832	1.24349	4	100329385	116.153	-1.09571	0.035069	1.45508	302	143.734	-1.19219	0.0101585	1.99317	611	no	yes	yes
ehd1b	ENSDARG00000014793	1009.63	-0.993939	1.32088e-07	6.87914	780	447839	968.692	-1.01274	2.64314e-07	6.57788	780	1004.81	-0.986308	5.36379e-07	6.27053	780	no	yes	no
ehd4	ENSDARG00000054302	726.083	-1.89221	1.04206e-08	7.98211	209	569546	922.089	-1.74257	1.40932e-10	9.85099	1900	918.1	-1.7332	1.10119e-09	8.95814	1900	yes	yes	yes
elovl7a	ENSDARG00000069279	110.864	-1.40604	0.0299398	1.52375	719	334217	110.517	-1.40199	0.0350406	1.45543	728	109.748	-1.39069	0.0461374	1.33595	778	yes	yes	yes
emid1	ENSDARG00000076119	536.922	-1.61274	1.58724e-09	8.79936	768	797252	877.441	-1.42981	3.94536e-12	11.4039	1517	883.319	-1.42434	7.19311e-13	12.1431	1517	yes	yes	yes
eno2	ENSDARG00000014287	14.5174	-3.13907	0.0926493	1.03316	925	402874	22.7708	-2.78874	0.056512	1.24786	1880	21.7059	-3.45582	0.0196603	1.70641	1880	no	no	yes
etv2	ENSDARG00000053868	1084.59	-1.75434	1.543e-14	13.8116	2021	555766	1064.43	-1.75167	2.91454e-14	13.5354	298	1089.5	-1.75278	2.48032e-13	12.6055	2021	yes	yes	yes
exoc3l2a	ENSDARG00000008414	555.454	-2.65903	2.64364e-15	14.5778	980	553301	2068.67	-2.96063	5.08193e-41	40.294	958	2255.5	-2.93074	6.37203e-41	40.1957	2154	yes	yes	yes
exoc3l2b	ENSDARG00000030782	581.874	-2.56727	9.246e-31	30.034	347	565839	603.295	-2.63448	2.26274e-31	30.6454	99	754.615	-2.52222	3.9368e-26	25.4049	2920	yes	yes	yes
fam129ba	ENSDARG00000062970	1227.41	-1.29632	6.92309e-14	13.1597	1692	563073	1218.4	-1.29002	4.122e-14	13.3849	1692	1219.67	-1.28835	9.96632e-15	14.0015	1692	yes	yes	yes
fam174b	ENSDARG00000068709	388.809	-1.27689	8.55441e-05	4.06781	435	798908	388.483	-1.27326	0.000122945	3.91029	447	554.185	-1.24725	0.000237804	3.62378	1621	yes	yes	yes
fam198b	ENSDARG00000077054	1014.56	-1.89531	1.18673e-21	20.9256	415	566369	1025.75	-1.90471	7.87603e-22	21.1037	422	1356.88	-1.87528	2.59659e-28	27.5856	5463	yes	yes	yes
fgd5a	ENSDARG00000088801	6915.62	-1.37758	3.68732e-26	25.4333	3735	100151562	6816.28	-1.37845	3.68054e-27	26.4341	1402	6909.25	-1.36436	8.46513e-31	30.0724	3735	yes	yes	yes
fgf18a	ENSDARG00000088048	150.167	-2.39017	1.24046e-05	4.90642	4266	359829	237.307	-1.96176	4.25558e-08	7.37104	936	150.009	-2.40363	3.95227e-05	4.40315	4266	yes	yes	yes
fhit	ENSDARG00000078195	81.8441	-2.63526	5.58668e-06	5.25285	841	393713	81.8432	-2.6358	8.43125e-06	5.07411	841	76.966	-2.62087	4.47957e-05	4.34876	841	yes	yes	yes
fhl3a	ENSDARG00000034643	892.807	-1.00233	4.25594e-05	4.371	1350	567097	881.592	-0.997501	7.60963e-05	4.11864	1351	889.411	-0.996382	0.000126191	3.89897	1351	yes	no	no
fhod1	ENSDARG00000051768	1350.83	-1.08959	3.67034e-09	8.43529	1369	503946	1349.46	-1.10367	2.39333e-09	8.621	1374	1351.95	-1.09197	4.18345e-09	8.37847	1374	yes	yes	yes
flrt1b	ENSDARG00000075597	160.046	-1.77456	7.65266e-06	5.11619	4442	100144397	78.8608	-1.77409	0.00435817	2.3607	1189	158.799	-1.7735	1.87174e-05	4.72775	4442	yes	yes	yes
flrt2	ENSDARG00000079355	3132.52	-1.52166	5.26272e-22	21.2788	5469	571972	2424.21	-1.54779	1.08117e-18	17.9661	967	3487.52	-1.55388	2.23146e-22	21.6514	6290	yes	yes	yes
flrt3	ENSDARG00000076895	5552.93	-1.04244	2.40262e-10	9.61932	1224	558864	5549.84	-1.04162	2.09619e-10	9.67857	1227	5526.24	-1.03697	4.02681e-10	9.39504	1224	yes	yes	yes
flt4	ENSDARG00000104453	6762.74	-2.44849	1.23355e-70	69.9088	795	30121	6769.36	-2.44773	4.19191e-73	72.3776	250	6737.67	-2.44202	6.42679e-78	77.192	795	yes	yes	yes
foxa1	ENSDARG00000102138	159.411	-1.00611	0.0348496	1.4578	470	30541	166.341	-1.00936	0.0375406	1.4255	470	158.573	-0.991772	0.0575629	1.23986	470	yes	yes	no
foxd3	ENSDARG00000021032	45.2256	-2.51545	0.0414775	1.38219	452	30548	44.8945	-2.50522	0.0523718	1.2809	452	45.1038	-2.57164	0.0648013	1.18842	452	yes	no	no
frem1b	ENSDARG00000062402	5536.85	-1.39408	6.26284e-22	21.2032	125	557221	5602.66	-1.38305	4.18869e-22	21.3779	166	5583.52	-1.37825	7.76866e-23	22.1097	166	yes	yes	yes
ftr83	ENSDARG00000025403	322.405	-1.0675	0.00498874	2.30201	4664	565972	317.109	-1.06585	0.00700339	2.15469	433	320.901	-1.06303	0.00760959	2.11864	4664	yes	yes	yes
ftr86	ENSDARG00000076839	59.0644	-1.81427	0.0491532	1.30845	420	767638	62.682	-1.81809	0.0603393	1.2194	423	58.4982	-1.82667	0.0695326	1.15781	423	yes	no	no
fuca1.1	ENSDARG00000035890	584.826	-1.22591	3.17294e-06	5.49854	232	335494	564.696	-1.1797	5.75369e-06	5.24005	232	582.285	-1.22156	8.94017e-06	5.04865	232	yes	yes	yes
fuca2	ENSDARG00000044073	693.12	-1.41174	8.49721e-07	6.07072	492	445487	685.873	-1.4081	1.521e-06	5.81787	492	691.005	-1.40354	4.23132e-06	5.37352	492	yes	yes	yes
gcnt4a	ENSDARG00000035198	231.029	-1.11408	0.00330863	2.48035	372	324510	212.887	-1.10283	0.00767628	2.11485	372	229.97	-1.11244	0.00661207	2.17966	372	yes	yes	yes
gdpd5b	ENSDARG00000076962	363.35	-1.67256	9.77377e-09	8.00994	2934	560645	369.939	-1.70734	8.38421e-09	8.07654	2685	393.659	-1.70358	2.70162e-08	7.56838	2941	yes	yes	yes
gfpt2	ENSDARG00000044094	191.384	-1.32451	0.0192182	1.71629	45	569945	188.728	-1.34268	0.0218405	1.66074	45	285.246	-1.15671	0.0502178	1.29914	2753	yes	yes	no
glula	ENSDARG00000099776	1933.43	-1.75497	5.24512e-08	7.28024	739	100000775	1882.75	-1.73807	9.79434e-08	7.00902	736	1927.6	-1.74944	2.35995e-07	6.6271	739	yes	yes	yes
gnav1	ENSDARG00000043006	425.441	-1.23683	2.40628e-07	6.61865	497	571305	467.341	-1.174	1.44772e-07	6.83931	44	523.14	-1.13948	4.6678e-08	7.33089	497	yes	yes	yes
gpr182	ENSDARG00000036616	1376.29	-2.37404	2.19249e-25	24.6591	290	323641	1375.31	-2.37176	6.21722e-25	24.2064	290	1369.99	-2.36798	2.9528e-23	22.5298	290	yes	yes	yes
grem2b	ENSDARG00000103092	331.08	-1.31013	0.0142071	1.84749	246	550399	371.32	-1.34017	0.0114467	1.94132	1946	369.592	-1.34437	0.0148584	1.82803	1946	yes	yes	yes
gria3b	ENSDARG00000037498	97.72	-1.47087	0.066097	1.17982	2880	368416	89.1244	-1.54087	0.04495	1.34727	357	101.069	-1.4655	0.0936524	1.02848	2880	no	yes	no
grin2bb	ENSDARG00000030376	92.0862	-1.26961	0.0566552	1.24676	3908	559976	117.161	-1.24629	0.00627286	2.20253	178	117.778	-1.25377	0.00797963	2.09802	3908	no	yes	yes
grin3ba	ENSDARG00000005364	96.0329	-1.3936	0.0254152	1.59491	621	566411	100.654	-1.32571	0.0382475	1.4174	1012	105.908	-1.35193	0.040181	1.39598	4115	yes	yes	yes
gucy1b1	ENSDARG00000086790	26.7307	-2.53588	0.0324716	1.4885	120	100150304	26.3997	-2.51844	0.041375	1.38326	120	29.5883	-2.68096	0.0307723	1.51184	1371	yes	yes	yes
he1.2	ENSDARG00000019122	272.278	-2.24724	0.00203917	2.69055	134	407971	186.849	-2.15876	0.0219547	1.65847	134	186.617	-2.16824	0.0316838	1.49916	134	yes	yes	yes
heg1	ENSDARG00000018441	2883.25	-1.11447	5.51402e-14	13.2585	1776	406202	2880.82	-1.1134	3.79426e-14	13.4209	1456	3168.65	-1.12262	1.53637e-15	14.8135	3478	yes	yes	yes
hhatla	ENSDARG00000039051	231.027	-1.08261	0.0328274	1.48376	4624	393861	231.036	-1.10946	0.0375456	1.42544	340	230.299	-1.08728	0.0463402	1.33404	4624	yes	yes	yes
hic1	ENSDARG00000055493	1642.37	-1.35722	1.37359e-15	14.8621	100	436585	1624.17	-1.35357	4.18937e-16	15.3779	100	2074.34	-1.31867	3.14404e-21	20.5025	2517	yes	yes	yes
hid1a	ENSDARG00000021846	18.4785	-0.952413	0.583855	0.233695	538	101884263	31.3455	-1.28811	0.317866	0.497756	538	73.6423	-1.37835	0.0396186	1.4021	4119	no	no	yes
hmx4	ENSDARG00000007941	110.9	-1.42988	0.00892514	2.04939	626	751654	104.299	-1.38878	0.0170381	1.76858	626	110.558	-1.44809	0.0164672	1.78338	626	yes	yes	yes
hoxb5a	ENSDARG00000013057	223.76	-1.0113	0.00119556	2.92243	866	30317	220.773	-1.001	0.00209107	2.67963	866	222.343	-1.00186	0.00207283	2.68344	866	yes	yes	yes
hsd17b12a	ENSDARG00000015709	129.353	-1.23346	0.0189578	1.72221	919	327417	119.451	-1.14524	0.0664616	1.17743	919	128.546	-1.22412	0.0312836	1.50468	919	yes	no	yes
hspb15	ENSDARG00000078411	58.754	-6.47882	1.24816e-09	8.90373	882	555589	58.7454	-6.47912	3.06261e-09	8.51391	887	58.5684	-7.37022	1.25827e-09	8.90023	882	yes	yes	yes
hyal2a	ENSDARG00000059931	2405.94	-2.24386	7.37464e-35	34.1323	448	567869	2616.14	-2.22872	5.35291e-35	34.2714	988	3130.66	-2.24714	5.8242e-38	37.2348	2955	yes	yes	yes
ifi30	ENSDARG00000056378	434.67	-1.60439	1.45077e-06	5.8384	176	336503	427.754	-1.58176	3.44607e-06	5.46268	176	432.991	-1.6018	6.44157e-06	5.19101	176	yes	yes	yes
igfbp2a	ENSDARG00000052470	399.348	-1.05369	0.00293425	2.5325	797	794176	399.022	-1.05052	0.00352064	2.45338	793	397.744	-1.05216	0.00493138	2.30703	798	yes	yes	yes
ikzf2	ENSDARG00000069111	62.362	-0.949846	0.382389	0.417495	281	100150224	120.764	-1.50701	0.0454687	1.34229	2676	120.313	-1.51103	0.0526261	1.2788	2676	no	yes	no
il13ra2	ENSDARG00000039436	1106.97	-3.35255	1.11013e-36	35.9546	746	368326	971.676	-3.34723	2.44832e-30	29.6111	77	1102.5	-3.34691	9.0914e-34	33.0414	746	yes	yes	yes
il4r.1	ENSDARG00000102583	125.068	-0.946787	0.0551857	1.25817	352	503594	127.374	-1.06435	0.0332197	1.4786	347	145.345	-0.952829	0.0388353	1.41077	352	no	yes	no
il4r.2	ENSDARG00000116052	96.3706	-1.3099	0.00545245	2.26341	647	563674	92.4084	-1.12122	0.0218719	1.66011	789	105.921	-1.13847	0.0274677	1.56118	2310	yes	yes	yes
inpp4b	ENSDARG00000075201	646.186	-1.74555	5.35992e-14	13.2708	233	560006	683.396	-1.71998	1.32691e-13	12.8772	2125	653.131	-1.69092	1.78517e-12	11.7483	233	yes	yes	yes
iqsec2b	ENSDARG00000077709	775.896	-1.18373	2.62022e-08	7.58166	3392	797187	767.948	-1.1975	2.63143e-08	7.57981	2755	774.284	-1.17808	7.63499e-08	7.11719	3392	yes	yes	yes
irgq1	ENSDARG00000086847	76.9062	-1.40742	0.0203635	1.69115	3741	565312	60.0699	-1.55691	0.0256915	1.59021	507	76.6769	-1.4045	0.0367369	1.4349	3741	yes	yes	yes
itga1	ENSDARG00000074316	3414.74	-1.64139	2.46199e-25	24.6087	77	570868	3721.09	-1.60536	3.71887e-25	24.4296	886	3919.49	-1.59849	6.32086e-25	24.1992	2772	yes	yes	yes
itga2.3	ENSDARG00000086838	104.93	-0.85579	0.24191	0.616347	480	100333484	164.328	-1.6961	0.000143712	3.84251	481	104.178	-0.845682	0.299218	0.524012	481	no	yes	no
itga6a	ENSDARG00000042282	296.401	-1.11924	0.00797371	2.09834	696	503893	340.62	-1.02238	0.00853536	2.06878	696	295.162	-1.12061	0.0109795	1.95942	696	yes	yes	yes
itga6b	ENSDARG00000069946	1195.67	-1.21752	3.71772e-10	9.42972	919	541320	1194.59	-1.23159	2.39227e-10	9.62119	1123	1194.5	-1.21589	2.49681e-10	9.60261	927	yes	yes	yes
kdr	ENSDARG00000017321	5214.27	-1.12783	1.89234e-15	14.723	1079	554230	5210.12	-1.1266	1.34294e-15	14.8719	1079	6036.47	-1.09985	3.29376e-16	15.4823	3674	yes	yes	yes
kera	ENSDARG00000056938	783.845	-1.8479	1.13446e-09	8.94521	1577	567017	778.479	-1.84064	1.63545e-09	8.78636	1577	778.567	-1.84377	2.73689e-09	8.56274	1577	yes	yes	yes
kirrel3l	ENSDARG00000104665	3973.51	-1.79177	4.93443e-21	20.3068	4631	557315	3961.8	-1.79299	8.17171e-22	21.0877	1620	3966.18	-1.78724	3.45454e-22	21.4616	4631	yes	yes	yes
klf2a	ENSDARG00000042667	1335.41	-1.29483	4.03014e-08	7.39468	718	117508	1334.42	-1.29517	5.56321e-08	7.25467	718	1329.67	-1.29055	1.28942e-07	6.88961	718	yes	yes	yes
klf2b	ENSDARG00000040432	1606.23	-1.5808	5.95289e-19	18.2253	4684	117509	1682.41	-1.60628	2.88495e-19	18.5399	2281	1707.05	-1.59936	1.68919e-19	18.7723	4684	yes	yes	yes
klf5a	ENSDARG00000015506	524.078	-0.337219	0.496415	0.304155	4197	100006043	132.979	-1.2732	0.0486126	1.31325	864	213.11	-1.30361	0.0122563	1.91164	4197	no	yes	yes
klf7b	ENSDARG00000043821	1586.48	-0.972175	2.29766e-10	9.63871	4768	553082	1089.38	-1.00539	2.16235e-07	6.66507	1380	1576.94	-0.964786	2.78189e-10	9.55566	4768	no	yes	no
klhl30	ENSDARG00000076094	53.466	-1.03868	0.242949	0.614486	60	559694	117.481	-1.41249	0.0210623	1.67649	5261	117.086	-1.41674	0.0284418	1.54604	5261	no	yes	yes
klhl4	ENSDARG00000016531	836.976	-1.456	1.21509e-13	12.9154	164	559349	891.034	-1.41012	5.66656e-12	11.2467	191	907.851	-1.42822	8.11354e-13	12.0908	341	yes	yes	yes
klhl41b	ENSDARG00000006757	114.849	-1.83079	0.00130664	2.88384	2437	321064	113.196	-1.78119	0.00308287	2.51105	366	115.123	-1.80383	0.00316302	2.4999	2437	yes	yes	yes
krt5	ENSDARG00000058371	4190.73	-1.60901	0.0220725	1.65615	592	797351	4447.49	-1.62929	0.0202759	1.69302	590	4412.47	-1.62129	0.0195259	1.70939	592	yes	yes	yes
krt96	ENSDARG00000095147	189.092	-1.0828	0.00174031	2.75937	231	321502	213.171	-1.00296	0.00209107	2.67963	219	178.205	-1.10851	0.00478442	2.32017	231	yes	yes	yes
krtt1c19e	ENSDARG00000090268	3836.6	-1.60262	0.0360288	1.44335	108	553371	3832.82	-1.60164	0.0360957	1.44254	108	3802.01	-1.59337	0.0358812	1.44513	108	yes	yes	yes
lamp2	ENSDARG00000014914	1579.24	-1.59872	1.84883e-14	13.7331	1218	541406	1719.45	-1.6225	1.84144e-15	14.7348	1218	1701.11	-1.57557	3.39437e-14	13.4692	1496	yes	yes	yes
lbx2	ENSDARG00000025131	63.0405	-1.60196	0.0432201	1.36431	2914	64276	56.4343	-1.8055	0.0188575	1.72452	655	62.503	-1.61389	0.0667768	1.17537	2914	yes	yes	no
ldb3a	ENSDARG00000056322	207.261	-1.20442	0.0230258	1.63779	2876	794339	196.376	-1.12176	0.0309815	1.5089	4578	207.593	-1.15962	0.0476012	1.32238	4578	yes	yes	yes
ldb3b	ENSDARG00000099974	155.113	-1.20667	0.0204	1.69037	1823	334100	152.146	-1.28949	0.0114512	1.94115	720	154.931	-1.21121	0.0300484	1.52218	1823	yes	yes	yes
lfng	ENSDARG00000037879	1877.02	-1.46411	5.37073e-15	14.27	1749	30158	1872.71	-1.45782	9.5719e-15	14.019	1749	1868.2	-1.45857	1.37219e-14	13.8626	1749	yes	yes	yes
lgmn	ENSDARG00000039150	3756.01	-2.47977	1.25566e-41	40.9011	2662	406625	3617.69	-2.47934	2.68602e-41	40.5709	957	3739.08	-2.47444	1.43346e-39	38.8436	2662	yes	yes	yes
lmbr1l	ENSDARG00000004745	483.178	-1.33331	1.70064e-08	7.76939	625	321314	466.99	-1.33252	7.036e-08	7.15267	625	576.615	-1.37453	6.95993e-07	6.15739	3013	yes	yes	yes
lmo2	ENSDARG00000095019	219.83	-1.43432	0.00228461	2.64119	833	30332	207.298	-1.37374	0.00486086	2.31329	833	219.198	-1.43641	0.00520847	2.28329	833	yes	yes	yes
lpl	ENSDARG00000087697	1816.15	-1.05179	1.6961e-08	7.77055	1505	30354	1558.3	-1.06022	4.39649e-09	8.35689	212	1804.71	-1.04655	3.82087e-09	8.41784	1505	yes	yes	yes
lypd6	ENSDARG00000004307	169.955	-1.44853	7.31986e-05	4.1355	513	447932	331.657	-1.59187	2.18989e-06	5.65958	3511	330.202	-1.58192	3.01469e-06	5.52076	3535	yes	yes	yes
lyve1a	ENSDARG00000075833	194.43	-4.68138	1.42437e-20	19.8464	250	560618	192.118	-4.66461	5.1297e-19	18.2899	250	193.561	-4.7391	6.0463e-19	18.2185	250	yes	yes	yes
lyve1b	ENSDARG00000062483	1233.8	-3.99384	4.54702e-45	44.3423	99	564249	1232.77	-3.99313	4.36471e-44	43.36	99	1228.08	-4.00054	3.8078e-43	42.4193	99	yes	yes	yes
mafba	ENSDARG00000017121	1224.83	-1.84488	4.74846e-13	12.3234	1932	30210	1223.54	-1.8425	9.05004e-13	12.0433	1932	1219.77	-1.83817	5.24424e-12	11.2803	1932	yes	yes	yes
mafbb	ENSDARG00000070542	421.842	-1.90937	3.64247e-05	4.4386	460	114463	421.862	-1.91006	4.97211e-05	4.30346	460	420.98	-1.90365	0.000149592	3.82509	460	yes	yes	yes
mafga	ENSDARG00000018109	91.1002	-3.06651	1.07583e-07	6.96826	45	415134	119.788	-2.64825	5.45446e-06	5.26325	744	124.312	-2.40963	4.13248e-07	6.38379	744	yes	yes	yes
magi2a	ENSDARG00000021590	750.515	-1.06491	9.21998e-09	8.03527	2815	564112	757.391	-1.05622	2.56434e-08	7.59102	2815	762.841	-1.02624	2.66319e-08	7.5746	3859	yes	yes	yes
man1a1	ENSDARG00000005652	2670.89	-1.20909	3.88534e-16	15.4106	5920	566078	1655.93	-1.22111	4.55743e-13	12.3413	341	2653.49	-1.20053	8.86426e-18	17.0524	5920	yes	yes	yes
man2a1	ENSDARG00000102200	2133.92	-1.02296	1.93634e-08	7.71302	349	560219	2133.14	-1.0121	1.21263e-08	7.91627	341	2133.15	-1.00864	1.19831e-08	7.92143	349	yes	yes	yes
manba	ENSDARG00000008238	245.205	-0.871532	0.0873516	1.05873	4984	393128	226.723	-1.07039	0.0488866	1.31081	150	244.052	-0.857599	0.13689	0.863629	4984	no	yes	no
mcf2l2	ENSDARG00000079742	1548.13	-1.22445	7.98901e-11	10.0975	2197	100149630	1373.81	-1.20135	2.6695e-10	9.57357	344	1577.04	-1.21371	1.07344e-11	10.9692	2904	yes	yes	yes
megf6b	ENSDARG00000074808	717.45	-1.366	3.86049e-09	8.41336	165	557764	955.997	-1.40937	1.21263e-08	7.91627	1406	712.97	-1.35829	7.37568e-09	8.1322	165	yes	yes	yes
meox1	ENSDARG00000007891	199.679	-1.23805	0.000315245	3.50135	1791	436723	200.996	-1.20388	0.000861328	3.06483	1262	201.022	-1.20971	0.00147496	2.83122	1791	yes	yes	yes
meox2a	ENSDARG00000040911	690.451	-3.57397	2.35715e-47	46.6276	411	556898	909.529	-3.46001	7.42488e-54	53.1293	3798	907.227	-3.46129	4.95278e-54	53.3052	3885	yes	yes	yes
mfng	ENSDARG00000042925	496.032	-1.7587	2.147e-15	14.6682	515	493633	489.398	-1.74958	8.25256e-15	14.0834	515	493.029	-1.75052	1.85281e-14	13.7322	515	yes	yes	yes
mfsd2b	ENSDARG00000030263	13.1972	-6.18187	0.00676574	2.16968	341	566968	13.1945	-6.18211	0.00871087	2.05994	396	13.1392	-6.1759	0.0136316	1.86545	396	yes	yes	yes
mfsd4ab	ENSDARG00000008263	17.1511	-5.59816	0.0156849	1.80452	280	558146	17.1487	-5.59848	0.0191282	1.71833	280	18.047	-6.63379	0.0109029	1.96246	387	yes	yes	yes
mgat1b	ENSDARG00000036065	1478.26	-1.65526	1.79333e-14	13.7463	4611	558524	1494.4	-1.66137	1.54547e-14	13.8109	3298	1502.14	-1.64913	2.22312e-13	12.653	4611	yes	yes	yes
mical2b	ENSDARG00000020395	251.152	-0.996883	0.00136643	2.86441	3029	569564	243.89	-1.00505	0.00183284	2.73688	160	251.965	-1.00243	0.00190982	2.71901	3029	no	yes	yes
mid1ip1a	ENSDARG00000041051	75.2283	-2.02741	0.0180025	1.74467	707	30600	75.2186	-2.02763	0.0217127	1.66329	705	74.9194	-2.07293	0.0249568	1.60281	707	yes	yes	yes
mras	ENSDARG00000062865	317.136	-1.03453	0.000676912	3.16947	2963	100317924	316.794	-1.03655	0.000807081	3.09308	2937	338.406	-1.03314	0.000203757	3.69089	2963	yes	yes	yes
mtmr12	ENSDARG00000059817	415.861	-1.01679	0.00126166	2.89906	582	569130	496.029	-0.942365	0.00177254	2.7514	2179	493.419	-0.935498	0.00295369	2.52964	2179	yes	no	no
mtmr8	ENSDARG00000008592	520.495	-1.22511	3.20848e-06	5.4937	1081	393365	501.675	-1.18109	2.15955e-05	4.66564	1086	518.209	-1.21913	1.43826e-05	4.84216	1086	yes	yes	yes
mtnr1ba	ENSDARG00000053833	79.5331	-4.74609	1.85308e-10	9.73211	41	30669	79.2005	-4.74063	6.10893e-10	9.21403	41	79.2573	-4.91122	1.33316e-09	8.87512	41	yes	yes	yes
mttp	ENSDARG00000008637	243.897	-1.7776	1.65632e-07	6.78085	2093	406207	211.538	-1.66241	8.43999e-06	5.07366	314	242.769	-1.74435	2.45569e-06	5.60983	2496	yes	yes	yes
muc13a	ENSDARG00000069559	246.829	-1.31546	0.0418315	1.3785	266	100538303	247.14	-1.26131	0.0614193	1.2117	619	249.521	-1.27777	0.0739215	1.13123	1204	yes	no	no
mybpc2b	ENSDARG00000021265	702.269	-1.01072	0.0216682	1.66418	510	541384	703.943	-1.00509	0.0247341	1.6067	513	708.787	-0.984155	0.0367444	1.43481	513	yes	yes	no
myct1a	ENSDARG00000056125	691.447	-1.39693	5.27636e-06	5.27767	479	796556	304.656	-1.30259	0.000837294	3.07712	51	682.723	-1.38849	2.24872e-05	4.64806	479	yes	yes	yes
myh14	ENSDARG00000073732	340.839	-1.06668	0.0312629	1.50497	6561	563011	277.122	-1.21321	0.0131765	1.8802	2055	339.443	-1.05399	0.0430332	1.3662	6621	yes	yes	yes
myl6	ENSDARG00000008494	201.002	-1.08332	0.00189237	2.72299	1684	798632	196.051	-1.03295	0.00700339	2.15469	1684	200.371	-1.08411	0.00387515	2.41171	1684	yes	yes	yes
mylpfb	ENSDARG00000002589	262.033	-1.24776	0.0261703	1.58219	176	447930	232.018	-1.17535	0.0413241	1.3838	176	261.507	-1.24411	0.0417923	1.3789	176	yes	yes	yes
myo15b	ENSDARG00000074852	183.192	-1.77891	7.28127e-06	5.13779	502	795537	183.176	-1.77929	1.01445e-05	4.99377	634	182.955	-1.79589	1.5582e-05	4.80738	634	yes	yes	yes
myo1cb	ENSDARG00000061579	2550.5	-1.30725	6.51836e-12	11.1859	2933	566459	2572.56	-1.30964	3.94536e-12	11.4039	2933	2562.17	-1.30176	2.20267e-11	10.6571	2933	yes	yes	yes
myo7aa	ENSDARG00000099871	2005.02	-2.32237	6.78314e-43	42.1686	860	252846	2005.91	-2.31522	6.4785e-44	43.1885	1086	2169.8	-2.31563	2.11686e-50	49.6743	2785	yes	yes	yes
myof	ENSDARG00000006112	206.918	-1.60841	0.000619532	3.20794	410	393849	219.768	-1.63412	0.000395746	3.40258	410	218.679	-1.6319	0.000577493	3.23845	410	yes	yes	yes
neurl1aa	ENSDARG00000069438	147.845	-1.82091	0.000514293	3.28879	2052	561943	145.19	-1.81827	0.000781569	3.10703	1439	146.659	-1.82294	0.00155576	2.80806	2052	yes	yes	yes
neurl1b	ENSDARG00000099694	455.107	-1.29249	7.00337e-10	9.15469	2172	553620	469.933	-1.2051	1.42707e-08	7.84555	2171	452.897	-1.2859	1.22929e-09	8.91035	2172	yes	yes	yes
nos1	ENSDARG00000068910	674.407	-1.36283	0.00809951	2.09154	543	60658	652.209	-1.36291	0.00920617	2.03592	222	678.501	-1.33595	0.0144407	1.84041	543	yes	yes	yes
npb	ENSDARG00000078828	176.234	-1.58649	0.0186588	1.72912	873	563766	186.108	-1.51216	0.0239638	1.62044	873	184.811	-1.51627	0.0283873	1.54688	873	yes	yes	yes
npl	ENSDARG00000009390	172.284	-1.64785	0.0170239	1.76894	1031	100148292	160.407	-1.6623	0.0186849	1.72851	740	171.754	-1.64373	0.0314669	1.50215	1031	yes	yes	yes
npy	ENSDARG00000036222	19.476	-3.88392	0.0308905	1.51017	1426	30281	18.1574	-3.78305	0.0591399	1.22812	379	19.4239	-3.88219	0.0585599	1.2324	1426	yes	no	no
nqo1	ENSDARG00000010250	89.7508	-1.61465	0.033052	1.4808	407	322506	82.1588	-1.48766	0.0708109	1.1499	407	89.0837	-1.60296	0.0562558	1.24983	407	yes	no	no
nr2f1a	ENSDARG00000052695	3216.01	-2.83578	6.36652e-32	31.1961	987	30418	3249.84	-2.83664	8.07378e-32	31.0929	971	3234.99	-2.83497	1.64977e-32	31.7826	987	yes	yes	yes
nr2f2	ENSDARG00000040926	4163.95	-2.69356	6.48322e-24	23.1882	2246	30424	4120.52	-2.69748	4.58505e-24	23.3387	2246	4141.15	-2.69149	2.69799e-24	23.569	2246	yes	yes	yes
nrxn3a	ENSDARG00000043746	171.616	-1.17843	0.0871246	1.05986	2395	563598	191.401	-1.37435	0.0354617	1.45024	1729	198.996	-1.28446	0.0591485	1.22806	3124	no	yes	no
nsmfb	ENSDARG00000101234	66.9966	-1.31054	0.0229475	1.63926	4881	569891	62.3705	-1.49903	0.0163473	1.78655	2048	67.0968	-1.36626	0.0256136	1.59153	4881	yes	yes	yes
ntn2	ENSDARG00000076748	690.758	-1.13466	5.06066e-05	4.29579	946	641469	483.121	-1.19895	0.000410906	3.38626	174	790.294	-1.1257	2.13869e-05	4.66985	2715	yes	yes	yes
oclnb	ENSDARG00000003091	99.3196	-1.60713	0.00893517	2.0489	769	494075	99.3062	-1.60746	0.0108816	1.96331	769	98.2638	-1.62039	0.0157173	1.80362	769	yes	yes	yes
ogna	ENSDARG00000044132	546.85	-2.00008	1.21478e-13	12.9155	544	541445	546.183	-1.99881	2.73129e-13	12.5636	544	544.032	-1.99577	9.61829e-13	12.0169	544	yes	yes	yes
olfm2b	ENSDARG00000102825	111.197	-1.7406	0.00131915	2.8797	773	406544	135.922	-1.80612	0.00189	2.72354	773	135.391	-1.81227	0.0022194	2.65376	773	yes	yes	yes
otog	ENSDARG00000068460	533.377	-1.83442	8.12565e-10	9.09014	869	103911405	528.687	-1.82536	1.35234e-09	8.86891	872	530.323	-1.81964	2.9728e-09	8.52683	980	yes	yes	yes
parvab	ENSDARG00000035629	215.528	-1.66025	1.49804e-07	6.82448	785	567123	214.861	-1.66332	2.66738e-07	6.57392	785	237.55	-1.59396	7.4532e-07	6.12766	1884	yes	yes	yes
pbx1a	ENSDARG00000100494	414.488	-1.03515	6.95049e-05	4.15798	5034	58138	275.206	-0.968708	0.00165663	2.78077	1238	415.976	-1.02855	0.000111628	3.95223	5540	yes	no	yes
pcdh12	ENSDARG00000076594	4633.65	-1.3587	2.80892e-18	17.5515	297	555419	5576.46	-1.35491	2.10099e-18	17.6776	2542	5553.2	-1.34869	2.26106e-17	16.6457	2542	yes	yes	yes
pcdh17	ENSDARG00000027041	2265.25	-1.0289	4.68019e-05	4.32974	1254	561336	2297.06	-1.02656	5.85394e-05	4.23255	1507	2249.74	-1.02208	4.49263e-05	4.3475	1254	yes	yes	yes
pde4ba	ENSDARG00000032868	1741.5	-1.21816	9.00684e-07	6.04543	2323	565706	1735.49	-1.12321	9.25253e-07	6.03374	2321	1761.5	-1.19049	1.25764e-06	5.90044	2323	yes	yes	yes
pdlim2	ENSDARG00000069956	79.8498	-1.65503	0.0202135	1.69436	1343	560322	76.5465	-1.83879	0.00950122	2.02222	1351	79.5343	-1.61139	0.0280959	1.55136	1351	yes	yes	yes
peak1	ENSDARG00000079756	3205.91	-1.00542	1.74662e-08	7.7578	237	565111	3666.17	-1.00952	1.48959e-08	7.82693	3877	3971.14	-1.01313	5.57499e-10	9.25376	7189	yes	yes	yes
pgfb	ENSDARG00000076767	49.1849	-1.13493	0.171616	0.765442	691	557468	80.2071	-1.3287	0.0346672	1.46008	3039	81.2868	-1.31823	0.0408871	1.38841	3080	no	yes	yes
pkp1b	ENSDARG00000052705	146.511	-1.40442	0.0149843	1.82436	507	797838	147.151	-1.31975	0.0184324	1.73442	509	145.613	-1.3946	0.0232053	1.63441	507	yes	yes	yes
pkp3a	ENSDARG00000051861	627.581	-1.16764	0.00594806	2.22562	1149	368397	626.51	-1.17759	0.00675646	2.17028	1149	622.088	-1.15754	0.00860054	2.06547	1149	yes	yes	yes
plekha7a	ENSDARG00000060813	173.255	-1.14399	0.00225404	2.64704	1644	571486	154.751	-1.16885	0.0103904	1.98337	8	172.302	-1.14204	0.0035033	2.45552	1644	yes	yes	yes
plk2b	ENSDARG00000019130	4079.92	-1.51133	8.14433e-19	18.0891	410	565576	4079.17	-1.50994	9.47392e-19	18.0235	410	4059.05	-1.50321	9.3442e-18	17.0295	410	yes	yes	yes
plpp3	ENSDARG00000059933	5814.26	-1.04008	9.74502e-11	10.0112	2868	557680	5819.03	-1.0314	1.35671e-10	9.86751	2009	5818.55	-1.02704	3.01301e-10	9.521	2868	yes	yes	yes
pmfbp1	ENSDARG00000101917	43.9064	-1.01349	0.573819	0.241225	114	101886040	268.986	-1.14268	0.000137645	3.86124	167	234.003	-1.00953	0.0137308	1.8623	167	no	yes	yes
ppm1h	ENSDARG00000063684	82.1869	-1.71472	0.00567602	2.24596	436	768291	77.551	-1.79185	0.00970838	2.01285	436	100.686	-1.47525	0.0040811	2.38922	1370	yes	yes	yes
prcp	ENSDARG00000037883	3008.58	-2.62866	3.60175e-31	30.4435	1386	436967	3025.41	-2.59491	2.40765e-29	28.6184	1386	3013.55	-2.59055	7.44726e-28	27.128	1386	yes	yes	yes
prox1a	ENSDARG00000055158	385.844	-2.36675	4.26858e-10	9.36972	546	30679	609.9	-2.38283	1.26432e-14	13.8981	3852	660.973	-2.41971	2.10173e-15	14.6774	3852	yes	yes	yes
prox1b	ENSDARG00000088810	219.164	-1.67025	1.17903e-06	5.92847	1273	564431	218.831	-1.66858	2.02654e-06	5.69324	1270	218.171	-1.67164	4.77541e-06	5.32099	1273	yes	yes	yes
prxl2c	ENSDARG00000075299	17.4931	-3.73085	0.0238219	1.62302	213	100332791	22.4495	-2.18344	0.186162	0.73011	213	32.5569	-1.58304	0.243742	0.613069	882	yes	no	no
ptn	ENSDARG00000102340	409.62	-2.17138	4.21725e-10	9.37497	1901	368211	401.386	-2.1426	9.54379e-10	9.02028	1867	487.75	-2.12311	4.8775e-10	9.3118	4296	yes	yes	yes
ptpn11b	ENSDARG00000012340	510.88	-1.40416	3.56368e-10	9.4481	1379	393426	517.78	-1.40451	5.35296e-10	9.27141	1560	616.355	-1.37636	6.26405e-10	9.20314	4737	yes	yes	yes
ptprb	ENSDARG00000076624	6626.07	-1.37858	2.3114e-25	24.6361	397	100149130	6435.7	-1.38502	4.7272e-26	25.3254	400	6645.03	-1.37688	1.87213e-25	24.7277	400	yes	yes	yes
ptprz1b	ENSDARG00000020871	460.741	-2.02744	1.98789e-10	9.70161	333	553019	460.727	-2.0153	2.33428e-10	9.63185	695	458.926	-2.01299	5.27936e-10	9.27742	847	yes	yes	yes
pvalb2	ENSDARG00000002768	359.08	-1.16523	0.0460125	1.33712	234	58028	350.864	-1.14719	0.0670304	1.17373	234	357.973	-1.16569	0.0666692	1.17607	234	yes	no	no
rab11bb	ENSDARG00000090086	523.186	-2.31131	6.99264e-15	14.1554	547	436828	522.525	-2.30553	2.27965e-14	13.6421	315	521.36	-2.30246	2.9395e-13	12.5317	653	yes	yes	yes
rab11fip3	ENSDARG00000016490	1437.24	-1.37428	8.04363e-18	17.0945	1236	573631	1720.31	-1.48604	3.99044e-23	22.399	4897	1428.01	-1.36524	1.69649e-18	17.7704	1236	yes	yes	yes
rab25a	ENSDARG00000058800	28.6977	-2.74428	0.0356628	1.44778	1033	494098	29.0224	-2.37427	0.0950715	1.02195	1369	28.5573	-2.85297	0.0439066	1.35747	1033	yes	no	yes
rab3il1	ENSDARG00000007711	338.952	-1.10029	0.000388589	3.41051	840	100331248	335.317	-1.11568	0.000444769	3.35187	734	356.623	-1.05314	0.00206349	2.6854	840	yes	yes	yes
rab7b	ENSDARG00000021287	150.512	-1.0547	0.0222314	1.65303	458	431725	148.533	-1.00371	0.0437214	1.35931	464	164.514	-0.963948	0.0404066	1.39355	458	yes	yes	no
ralgapa2	ENSDARG00000005861	5642.21	-1.59593	2.2535e-34	33.6471	1728	568210	5637.24	-1.59186	1.35252e-35	34.8689	1734	5622.53	-1.58662	1.96369e-39	38.7069	1926	yes	yes	yes
ramp2	ENSDARG00000037895	1164.15	-1.83698	1.98262e-15	14.7028	1223	566313	1169.4	-1.83095	2.82954e-15	14.5483	1223	1161.62	-1.8248	2.36814e-14	13.6256	1223	yes	yes	yes
rapgef4	ENSDARG00000079872	38.2765	-3.15853	0.0100692	1.99701	329	559170	42.8907	-3.1174	0.00112853	2.94749	1626	43.7131	-2.96547	0.00438286	2.35824	3167	yes	yes	yes
rasip1	ENSDARG00000074829	3682.39	-1.35336	1.19254e-23	22.9235	380	102725533	3823.11	-1.36701	1.42205e-24	23.8471	381	3799.56	-1.36152	2.31932e-25	24.6346	381	yes	yes	yes
rassf4a	ENSDARG00000012460	125.402	-2.81789	1.83335e-06	5.73676	1713	494494	85.1257	-2.58794	1.03377e-05	4.98558	1317	120.335	-3.30714	0.00288924	2.53922	1713	yes	yes	yes
rbfox1	ENSDARG00000014746	331.996	-1.17298	0.000155839	3.80732	3856	449554	320.775	-1.2663	6.49615e-05	4.18734	1967	341.392	-1.14423	0.000214265	3.66905	3856	yes	yes	yes
rbfox1l	ENSDARG00000021184	176.574	-1.05451	0.0323444	1.4902	769	407613	178.23	-1.00821	0.0469686	1.32819	767	199.4	-1.0712	0.0525186	1.27969	1667	yes	yes	no
reep1	ENSDARG00000014854	101.33	-1.3225	0.0041171	2.38541	827	799901	85.8148	-1.51794	0.010737	1.96912	499	419.774	-1.46089	2.61295e-07	6.58287	8282	yes	yes	yes
reep3a	ENSDARG00000017569	296.396	-1.3706	7.62522e-05	4.11775	2814	641577	168.665	-1.42333	0.00173033	2.76187	503	334.034	-1.28864	0.000149647	3.82493	2814	yes	yes	yes
renbp	ENSDARG00000008931	66.332	-1.4642	0.0267679	1.57239	530	791728	66.3296	-1.46473	0.0313954	1.50313	530	69.3753	-1.5295	0.0309309	1.50961	857	yes	yes	yes
rgcc	ENSDARG00000035810	175.237	-1.79678	0.000913109	3.03948	490	431737	81.51	-1.32114	0.0622256	1.20603	490	174.635	-1.80305	0.00195542	2.70876	490	yes	no	yes
rhoua	ENSDARG00000019709	151.485	-1.20852	0.00241419	2.61723	987	492802	151.484	-1.20181	0.00325276	2.48775	987	357.007	-1.24015	0.000185336	3.73204	4480	yes	yes	yes
rnf141	ENSDARG00000041802	86.1458	-1.27565	0.0475269	1.32306	92	414846	113.539	-1.01973	0.124904	0.903425	1802	113.188	-1.01675	0.164252	0.784488	1921	yes	no	no
rps6ka3b	ENSDARG00000057927	332.324	-1.40857	1.71237e-07	6.7664	853	100009657	440.219	-1.40451	3.51546e-09	8.45402	3752	437.744	-1.39656	7.77353e-09	8.10938	3752	yes	yes	yes
s100a10b	ENSDARG00000025254	226.014	-1.28274	0.00985001	2.00656	478	406276	223.023	-1.26914	0.0121903	1.91399	279	224.108	-1.26992	0.0161267	1.79245	478	yes	yes	yes
s1pr5a	ENSDARG00000040526	654.535	-1.12639	9.80214e-05	4.00868	933	492350	644.644	-1.11128	0.000150123	3.82355	928	652.62	-1.12562	0.000200382	3.69814	933	yes	yes	yes
sash1b	ENSDARG00000058853	1267.63	-1.69439	3.05614e-25	24.5148	2971	566448	1338.51	-1.40105	8.92009e-18	17.0496	736	1278.1	-1.6895	2.41411e-27	26.6172	2971	yes	yes	yes
scara3	ENSDARG00000008060	98.0157	-1.2281	0.0236419	1.62632	1196	564588	102.301	-1.27899	0.0175157	1.75657	1197	101.954	-1.29579	0.0205182	1.68786	1197	yes	yes	yes
scarf1	ENSDARG00000077285	1193.14	-1.30605	2.51592e-09	8.5993	2415	100005273	1156.15	-1.29	2.52599e-09	8.59757	1382	1188.74	-1.29614	2.20242e-08	7.6571	2415	yes	yes	yes
scel	ENSDARG00000034677	235.944	-1.34984	0.00714203	2.14618	471	368684	234.939	-1.38573	0.0129311	1.88836	464	238.36	-1.31776	0.01306	1.88406	1742	yes	yes	yes
sele	ENSDARG00000009123	2784.85	-2.56675	3.68272e-48	47.4338	1862	558139	2948.82	-2.58458	6.41773e-49	48.1926	1862	2939.28	-2.57939	5.43604e-47	46.2647	1862	yes	yes	yes
selenop	ENSDARG00000093549	1536.72	-1.61234	8.88093e-10	9.05154	1133	352931	1521.89	-1.62857	2.41666e-09	8.61678	1061	90.0758	-0.78338	0.593857	0.226318	1133	yes	yes	no
sema3d	ENSDARG00000017369	724.403	-1.11647	4.91592e-07	6.3084	251	30250	724.03	-1.11481	5.9727e-07	6.22383	251	719.951	-1.11118	4.16936e-07	6.37993	251	yes	yes	yes
serpinb1	ENSDARG00000055416	63.7016	-1.30973	0.0324037	1.4894	1902	436926	57.7569	-1.18752	0.0829507	1.08118	53	63.5028	-1.34252	0.0395269	1.40311	1902	yes	no	yes
serpinf1	ENSDARG00000069048	2013.83	-1.14929	5.53758e-11	10.2567	664	447800	1981.04	-1.16053	3.43508e-11	10.4641	664	2001.72	-1.14254	1.06844e-11	10.9713	664	yes	yes	yes
SH3TC1	ENSDARG00000077330	878.568	-2.79975	2.00357e-46	45.6982	3004	100535608	780.505	-2.80557	4.96504e-43	42.3041	365	884.237	-2.81344	2.63846e-46	45.5787	3004	yes	yes	yes
sh3tc2	ENSDARG00000089917	1998.1	-1.68322	6.68601e-19	18.1748	718	100535152	2227.75	-1.7368	4.18869e-22	21.3779	230	2231.17	-1.7344	2.52405e-21	20.5979	718	yes	yes	yes
shank3b	ENSDARG00000063054	3126.21	-1.21569	2.11132e-17	16.6754	327	566152	3700.69	-1.23931	5.42683e-19	18.2655	2254	3687.27	-1.23262	5.42807e-19	18.2654	2834	yes	yes	yes
shox	ENSDARG00000025891	345.928	-1.73662	7.34544e-07	6.13398	100	664748	570.341	-1.74611	8.71705e-06	5.05963	100	613.449	-1.72125	1.06047e-05	4.9745	3007	yes	yes	yes
si:ch1073-280e3.1	ENSDARG00000019772	6.92969	-5.25248	0.0882172	1.05445	108	563828	11.2212	-4.98655	0.0372948	1.42835	1568	11.1833	-5.94326	0.0241111	1.61778	1568	no	yes	yes
si:ch1073-340i21.3	ENSDARG00000088885	91.7387	-1.99133	0.0064836	2.18818	487	570991	89.4228	-2.1298	0.0057992	2.23663	475	92.3853	-2.04353	0.00741729	2.12976	537	yes	yes	yes
si:ch1073-345a8.1	ENSDARG00000092671	396.356	-1.25269	0.000230418	3.63748	198	100149472	465.932	-1.28425	0.000212401	3.67284	3732	447.547	-1.28295	0.000148245	3.82902	3833	yes	yes	yes
si:ch1073-459j12.1	ENSDARG00000006901	4680.62	-1.19421	1.38849e-11	10.8575	307	567630	4825.45	-1.19858	4.51601e-12	11.3452	160	4797.71	-1.19015	1.3119e-12	11.8821	307	yes	yes	yes
si:ch211-106h4.9	ENSDARG00000075706	140.906	-0.914047	0.0397357	1.40082	4137	561671	138.254	-1.02019	0.0284026	1.54664	271	140.052	-0.970359	0.0428823	1.36772	4137	no	yes	no
si:ch211-12m10.1	ENSDARG00000011171	115.169	-0.77716	0.154678	0.810572	1916	568845	124.745	-1.0108	0.0271999	1.56543	1047	124.634	-0.794893	0.187381	0.727275	1916	no	yes	no
si:ch211-145b13.6	ENSDARG00000069998	575.905	-2.05756	1.35795e-22	21.8671	128	100317105	593.375	-2.08075	1.6863e-22	21.7731	129	643.433	-2.07064	8.72833e-22	21.0591	238	yes	yes	yes
si:ch211-147k10.5	ENSDARG00000029431	123.754	-2.2312	3.05347e-06	5.51521	133	557634	228.994	-2.04937	7.22465e-09	8.14118	1710	227.521	-2.04846	1.2113e-08	7.91675	1710	yes	yes	yes
si:ch211-14k19.8	ENSDARG00000088975	2476.92	-1.59107	5.04513e-17	16.2971	86	567378	2545.46	-1.56486	3.00816e-17	16.5217	86	2463.47	-1.58387	8.85624e-17	16.0528	86	yes	yes	yes
si:ch211-157c3.4	ENSDARG00000087093	132.628	-1.61958	0.0259451	1.58594	1256	561592	133.92	-1.45817	0.0883185	1.05395	1261	138.934	-1.51895	0.0766963	1.11523	1261	yes	no	no
si:ch211-159i8.4	ENSDARG00000076332	435.3	-1.73845	6.08531e-08	7.21572	2083	792773	443.166	-1.73232	3.86612e-08	7.41273	301	440.67	-1.72334	5.77109e-08	7.23874	2083	yes	yes	yes
si:ch211-175m2.5	ENSDARG00000089019	12.2037	-5.10718	0.0445605	1.35105	397	568697	12.2015	-5.10745	0.0518776	1.28502	399	12.141	-6.06196	0.034142	1.46671	399	yes	no	yes
si:ch211-195o20.7	ENSDARG00000089221	173.278	-1.16848	0.00115151	2.93873	1113	564006	192.424	-1.09784	0.00222817	2.65205	1113	191.832	-1.09328	0.00366743	2.43564	1113	yes	yes	yes
si:ch211-214j24.9	ENSDARG00000015931	50.8248	-2.31452	0.00404651	2.39292	508	559029	37.2893	-2.29788	0.12511	0.902709	1194	37.158	-2.35756	0.156667	0.805023	1194	yes	no	no
si:ch211-252f13.5	ENSDARG00000097535	209.895	-1.02541	0.00699796	2.15503	330	101886869	322.429	-0.777815	0.0676589	1.16968	1364	395.771	-0.972287	0.00993278	2.00293	2605	yes	no	no
si:ch211-264f5.8	ENSDARG00000078151	64.0285	-0.87506	0.289823	0.537868	1815	100331381	174.593	-1.06186	0.0103834	1.98366	1797	63.8223	-0.896437	0.334923	0.475055	1815	no	yes	no
si:ch211-266g18.6	ENSDARG00000003381	48.5174	-1.84483	0.0314546	1.50232	294	565707	55.1093	-1.32053	0.0826929	1.08253	294	54.9287	-1.29439	0.111431	0.952993	294	yes	no	no
si:ch211-266g18.9	ENSDARG00000075905	408.566	-3.50911	1.56857e-13	12.8045	381	101883291	423.407	-3.41024	5.30545e-17	16.2753	327	422.97	-3.38396	2.37909e-15	14.6236	647	yes	yes	yes
si:ch211-66e2.3	ENSDARG00000078824	254.8	-1.81421	2.87912e-06	5.54074	2301	100141487	235.332	-1.77416	2.34174e-05	4.63046	227	257.639	-1.83722	9.43014e-06	5.02548	2301	yes	yes	yes
si:ch211-69b22.5	ENSDARG00000099621	300.651	-1.51208	0.000254194	3.59484	5978	108192171	305.614	-1.48743	0.000419009	3.37778	8479	338.162	-1.44485	0.000279917	3.55297	8642	yes	yes	yes
si:ch211-79k12.1	ENSDARG00000079175	65.3364	-2.14022	0.007783	2.10885	657	568891	60.0496	-2.05142	0.019366	1.71296	657	64.7615	-2.15779	0.012721	1.89548	657	yes	yes	yes
si:ch73-252p3.1	ENSDARG00000099522	289.777	-0.837947	0.0145127	1.83825	3389	394213	205.583	-1.29676	0.00584032	2.23356	334	192.475	-0.463424	0.47127	0.32673	3389	no	yes	no
si:ch73-280o22.2	ENSDARG00000077072	298.675	-1.00088	0.00174636	2.75787	1789	798741	315.494	-1.00895	0.00168353	2.77378	465	318.061	-1.005	0.00163918	2.78537	1789	yes	yes	yes
si:ch73-281f12.4	ENSDARG00000059567	904.302	-1.076	1.23582e-09	8.90804	472	102216267	906.906	-1.07956	9.08935e-10	9.04147	559	928.311	-1.07825	1.3157e-09	8.88084	472	yes	yes	yes
si:ch73-380l3.4	ENSDARG00000096863				#NUM!	532	101885005	10.5619	-4.89918	0.0409493	1.38775	266	10.5289	-4.89445	0.0543632	1.26469	532	no	yes	no
si:ch73-86n18.1	ENSDARG00000056379	453.504	-1.20258	4.19301e-05	4.37747	82	564061	490.754	-1.17681	6.79526e-05	4.16779	38	508.627	-1.18085	5.13222e-05	4.2897	82	yes	yes	yes
si:dkey-102c8.3	ENSDARG00000113572	84.7993	-1.42311	0.031578	1.50061	4563	556374	63.3489	-1.28395	0.128473	0.891189	1608	83.8014	-1.40525	0.0495518	1.30494	4563	yes	no	yes
si:dkey-119m7.4	ENSDARG00000071049	182.835	-1.50163	5.69094e-05	4.24482	289	560629	180.85	-1.47903	3.07392e-05	4.51231	289	186.511	-1.45836	0.000216793	3.66396	289	yes	yes	yes
si:dkey-119m7.4	ENSDARG00000043982	182.835	-1.50163	5.69094e-05	4.24482	749	560629	180.85	-1.47903	3.07392e-05	4.51231	289	186.511	-1.45836	0.000216793	3.66396	1176	yes	yes	yes
si:dkey-164f24.2	ENSDARG00000089418	99.3257	-2.04719	0.00882736	2.05417	1605	566607	101.302	-2.03712	0.0124997	1.9031	438	100.933	-2.04788	0.0176094	1.75426	1605	yes	yes	yes
si:dkey-183i3.5	ENSDARG00000056248	151.149	-2.84144	1.41976e-11	10.8478	220	566445	150.808	-2.83868	3.62385e-11	10.4408	220	150.294	-2.85695	1.59721e-10	9.79664	256	yes	yes	yes
si:dkey-238c7.16	ENSDARG00000069537	124.414	-1.40127	0.00134868	2.87009	83	559078	132.662	-1.17857	0.00453938	2.343	600	152.923	-1.11716	0.00443043	2.35355	1287	yes	yes	yes
si:dkey-239j18.2	ENSDARG00000095254	160.097	-2.60175	0.00105061	2.97856	407	321853	159.796	-2.59949	0.00141925	2.84794	242	164.31	-2.55399	0.00315043	2.50163	407	yes	yes	yes
si:dkey-246i14.3	ENSDARG00000090427	169.629	-1.67787	0.00147503	2.8312	611	100003450	312.84	-1.43665	0.000140983	3.85083	2390	312.095	-1.43158	0.000214195	3.66919	2390	yes	yes	yes
si:dkey-269i1.4	ENSDARG00000095744	392.132	-1.87616	0.2432	0.614036	224	564835	247.949	-1.94789	0.0265233	1.57637	238	393.758	-1.90114	0.255625	0.592397	224	no	yes	no
si:dkey-26g8.4	ENSDARG00000087651	18.8111	-0.188372	0.987604	0.00541704	300	564906	1375.2	-1.97461	0.037863	1.42179	230	1.6488	3.32023	0.570533	0.243719	300	no	yes	no
si:dkey-28n18.9	ENSDARG00000097193	639.945	-3.5486	7.57423e-24	23.1207	88	557582	591.785	-3.5921	8.20784e-23	22.0858	88	637.612	-3.54397	1.04899e-21	20.9792	88	yes	yes	yes
si:dkey-30e9.7	ENSDARG00000101697	214.495	-1.41034	0.00032929	3.48242	254	100006681	214.467	-1.44048	0.000405213	3.39232	254	212.696	-1.40376	0.000656898	3.1825	254	yes	yes	yes
si:dkey-38p12.3	ENSDARG00000061844	1114.53	-1.0562	8.01501e-12	11.0961	2300	555489	1107.21	-1.0597	1.27718e-11	10.8937	1214	1122.98	-1.05499	1.68452e-12	11.7735	2300	yes	yes	yes
si:dkey-78a14.4	ENSDARG00000036066	129.695	-1.43123	0.000226167	3.64557	1560	794381	148.163	-1.43857	0.00015713	3.80374	2603	147.647	-1.4417	0.000205533	3.68712	2603	yes	yes	yes
si:dkey-87k14.1	ENSDARG00000097299	3132.52	-1.52166	5.26272e-22	21.2788	253	100535467	7.26238	-1.87598	0.613062	0.212495	150	7.24497	-2.13754	0.651028	0.186401	253	yes	no	no
si:dkey-91m11.5	ENSDARG00000042329	1056.78	-1.70621	6.53839e-23	22.1845	130	560226	1191.36	-1.66335	7.39041e-23	22.1313	2358	1190.09	-1.66442	1.83347e-24	23.7367	2358	yes	yes	yes
si:dkeyp-106c3.1	ENSDARG00000090623	3227.43	-1.54438	3.57627e-15	14.4466	277	558820	4505.78	-1.58492	1.59315e-17	16.7977	279	3208.84	-1.53847	1.97247e-15	14.705	277	yes	yes	yes
si:dkeyp-117h8.2	ENSDARG00000011602	103.638	-1.26349	0.0148308	1.82884	1634	570321	105.616	-1.28024	0.0168508	1.77338	1520	110.55	-1.33516	0.0110409	1.95699	1634	yes	yes	yes
si:dkeyp-13a3.10	ENSDARG00000092225	122.428	-1.5153	0.0239299	1.62106	1075	100002203	105.931	-1.49626	0.0340627	1.46772	448	121.659	-1.52711	0.0377529	1.42305	1075	yes	yes	yes
si:dkeyp-69b9.3	ENSDARG00000088881	122.759	-2.13212	0.000309974	3.50867	890	573741	151.794	-2.05385	0.00160824	2.79365	886	121.98	-2.13876	0.000765084	3.11629	890	yes	yes	yes
si:dkeyp-97a10.3	ENSDARG00000104656	107.597	-1.28528	0.0136997	1.86329	348	100334925	109.24	-1.27569	0.0190767	1.7195	930	105.606	-1.29023	0.0219938	1.6577	348	yes	yes	yes
si:dkeyp-9d4.3	ENSDARG00000100166	77.2244	-1.28785	0.045426	1.3427	1707	100148061	82.1586	-1.34788	0.0443111	1.35349	1707	81.8634	-1.35662	0.0520996	1.28317	1707	yes	yes	no
skor1a	ENSDARG00000069030	73.266	-1.89014	0.000860916	3.06504	1334	100170817	74.2481	-1.90991	0.000999758	3.00011	732	73.9948	-1.92997	0.00165547	2.78108	1334	yes	yes	yes
slc16a12b	ENSDARG00000089885	177.258	-1.25085	0.0157654	1.80229	545	449947	177.252	-1.25125	0.0186075	1.73031	545	176.745	-1.25979	0.0224581	1.64863	545	yes	yes	yes
slc16a9a	ENSDARG00000013926	167.683	-3.13294	5.82615e-09	8.23462	1240	795588	200.025	-2.72209	6.79496e-08	7.16781	1240	199.759	-2.75225	1.70078e-07	6.76935	1240	yes	yes	yes
slc17a5	ENSDARG00000055190	277.574	-1.65272	0.0002521	3.59843	667	767760	274.957	-1.69454	0.000261352	3.58277	667	349.094	-1.62775	0.00021696	3.66362	1692	yes	yes	yes
slc22a7b.1	ENSDARG00000056643	66.3433	-2.61061	0.0110126	1.95811	1162	393320	65.6893	-2.59693	0.015604	1.80676	50	66.4828	-2.65775	0.0194578	1.71091	1162	yes	yes	yes
slc27a2a	ENSDARG00000036237	140.605	-1.15164	0.0415054	1.3819	574	449925	117.167	-0.998321	0.133138	0.875697	574	139.84	-1.17548	0.0570814	1.24351	574	yes	no	no
slc43a1b	ENSDARG00000037748	217.164	-2.09801	1.81051e-11	10.7422	1881	100009631	213.189	-2.07188	9.26213e-11	10.0333	1881	215.782	-2.09803	1.15555e-10	9.93721	1881	yes	yes	yes
slc4a2a	ENSDARG00000028173	1158.1	-1.03685	1.43485e-06	5.84319	2686	566075	1161.02	-1.03509	1.17385e-06	5.93039	2692	1155.6	-1.03175	7.2135e-07	6.14185	2692	yes	yes	yes
slc8a1b	ENSDARG00000043406	237.627	-1.0142	0.00742887	2.12908	1214	797199	247.18	-0.929198	0.0258763	1.5871	252	324.644	-0.993327	0.00421082	2.37563	4454	yes	no	no
slc9a7	ENSDARG00000076754	1238.9	-2.01776	2.74494e-14	13.5615	1870	554532	1256.33	-2.0338	2.95348e-14	13.5297	1870	1260.97	-2.0195	9.47955e-14	13.0232	1870	yes	yes	yes
slco2b1	ENSDARG00000054609	1057.41	-2.61764	2.97753e-38	37.5261	2150	792084	932.306	-2.56935	1.89502e-33	32.7224	671	1052.23	-2.61048	1.36722e-37	36.8642	2150	yes	yes	yes
smyd2b	ENSDARG00000005629	99.342	-1.34096	0.0293174	1.53287	4263	568616	98.0266	-1.11892	0.150719	0.821832	1529	101.999	-1.16548	0.124777	0.903866	4263	yes	no	no
snrkb	ENSDARG00000017665	950.553	-1.52299	2.87714e-17	16.541	237	393806	1268.3	-1.35941	1.36212e-19	18.8658	2109	1267.88	-1.3569	4.60658e-20	19.3366	2238	yes	yes	yes
snx1a	ENSDARG00000071031	3089.65	-1.04338	8.06393e-07	6.09345	836	337386	3127.26	-1.04532	1.12804e-06	5.94768	1119	3120.9	-1.04127	3.52318e-06	5.45307	1119	yes	yes	yes
snx22	ENSDARG00000053204	86.8038	-3.39763	7.25221e-10	9.13953	374	561624	86.8022	-3.3981	1.60469e-09	8.79461	322	125.023	-3.39858	8.91771e-09	8.04975	1116	yes	yes	yes
snx8a	ENSDARG00000074842	294.381	-2.40244	7.94249e-09	8.10004	1100	555448	294.065	-2.40141	1.49612e-08	7.82503	1100	300.656	-2.43406	4.87273e-08	7.31223	1630	yes	yes	yes
snx9a	ENSDARG00000000837	507.613	-1.45765	2.99467e-08	7.52365	966	368424	553.472	-1.47402	9.43171e-09	8.02541	2341	561.577	-1.45791	3.8218e-08	7.41773	2341	yes	yes	yes
sptbn5	ENSDARG00000097683	125.721	-1.70552	0.000367747	3.43445	298	569585	121.421	-1.66816	0.000576625	3.23911	315	126.548	-1.71509	0.000619452	3.20799	354	yes	yes	yes
st14b	ENSDARG00000044655	88.7641	-1.75155	0.031021	1.50834	169	777629	89.7469	-1.71474	0.0461559	1.33577	174	115.052	-1.83187	0.022052	1.65655	2130	yes	yes	yes
stab1	ENSDARG00000076484	13049.5	-2.74553	3.87786e-63	62.4114	741	570626	12730.8	-2.73998	1.18656e-63	62.9257	124	12991.1	-2.73986	1.21792e-62	61.9144	741	yes	yes	yes
stab2	ENSDARG00000045748	37037.7	-3.72507	1.49991e-66	65.8239	324	565194	36816	-3.72746	7.93618e-67	66.1004	324	36659.7	-3.72237	1.20419e-66	65.9193	324	yes	yes	yes
stard15	ENSDARG00000071585	15.1824	-4.5269	0.0305179	1.51545	2799	797016	9.9043	-4.80642	0.109136	0.962034	147	15.1401	-5.41845	0.0300761	1.52178	2799	yes	no	yes
strbp	ENSDARG00000021455	983.19	-1.26736	7.22931e-13	12.1409	2443	557957	1016.15	-1.19612	1.1713e-09	8.93133	670	1597.98	-1.3204	2.22745e-17	16.6522	2443	yes	yes	yes
stx2b	ENSDARG00000068217	121.452	-0.88978	0.130418	0.884661	133	100536636	123.09	-0.99926	0.0700139	1.15482	179	206.538	-1.0631	0.0161921	1.7907	179	no	no	yes
susd5	ENSDARG00000088277	52.4685	-2.14613	0.00726676	2.13866	139	101886789	53.4518	-2.09539	0.00857063	2.06699	198	104.234	-1.16609	0.0231793	1.6349	9128	yes	yes	yes
syndig1l	ENSDARG00000042390	30.0306	-1.15201	0.372279	0.429131	85	555204	68.6448	-1.36355	0.0262009	1.58168	3104	83.2199	-1.45722	0.00665703	2.17672	6340	no	yes	yes
sypl2a	ENSDARG00000055307	1522.87	-1.16136	4.59143e-09	8.33805	3755	393640	1538.7	-1.1636	1.12109e-08	7.95036	3755	1540.19	-1.16656	2.95393e-08	7.5296	3755	yes	yes	yes
syt14b	ENSDARG00000001891	76.5667	-0.883917	0.220442	0.656706	520	561547	125.395	-1.11368	0.0236976	1.6253	532	188.789	-1.04388	0.0112588	1.94851	3580	no	yes	yes
sytl4	ENSDARG00000102433	97.7064	-1.23547	0.033575	1.47398	440	553322	105.623	-1.33698	0.0161544	1.79171	444	105.646	-1.3473	0.020554	1.6871	444	yes	yes	yes
tbx18	ENSDARG00000036930	1304.71	-1.9714	3.61108e-21	20.4424	452	572713	1276.66	-1.97231	7.22336e-21	20.1413	452	1659.67	-2.01597	6.40656e-21	20.1934	2951	yes	yes	yes
tbxta	ENSDARG00000101576	23.7552	-2.7118	0.0475269	1.32306	863	30399	23.7519	-2.71203	0.0552446	1.25771	863	23.6539	-2.84423	0.0645741	1.18994	863	yes	no	no
tek	ENSDARG00000028663	1753.53	-1.73085	3.54022e-19	18.451	181	30747	1782.16	-1.71571	1.40093e-19	18.8536	190	1818.21	-1.71308	7.65453e-19	18.1161	362	yes	yes	yes
tfap2a	ENSDARG00000059279	2516.92	-1.44296	3.25342e-20	19.4877	1115	140618	2519.14	-1.44063	2.35356e-20	19.6283	1115	2507.8	-1.43583	3.86677e-21	20.4127	1115	yes	yes	yes
tfec	ENSDARG00000098745	114.844	-1.34789	0.00829439	2.08122	57	556894	163.362	-1.63302	0.000511553	3.29111	990	174.349	-1.6821	0.000732434	3.13523	1116	yes	yes	yes
tgfbr2b	ENSDARG00000034541	1582.17	-1.23409	1.3983e-11	10.8544	439	30739	1579.48	-1.23639	1.29697e-11	10.8871	439	1611.46	-1.24012	4.70399e-11	10.3275	672	yes	yes	yes
tgm2b	ENSDARG00000074094	687.152	-1.13739	9.41638e-06	5.02612	1062	323856	685.763	-1.13496	1.15027e-05	4.9392	379	682.557	-1.13267	9.75683e-06	5.01069	1062	yes	yes	yes
them6	ENSDARG00000100260	35.9727	-2.01581	0.0300826	1.52169	398	569944	35.9676	-2.01607	0.0354014	1.45098	309	44.3773	-0.845343	0.531591	0.274422	1313	yes	yes	no
tie1	ENSDARG00000004105	7064.99	-1.5179	7.92524e-28	27.101	4877	30746	6934.44	-1.51227	5.42375e-27	26.2657	2904	7044.06	-1.51129	2.30349e-27	26.6376	4877	yes	yes	yes
tll1	ENSDARG00000037429	3456.03	-1.54295	4.97327e-17	16.3034	1095	474335	3453.29	-1.54114	6.03798e-17	16.2191	1095	4589.59	-1.50792	3.7565e-15	14.4252	5855	yes	yes	yes
tlr5b	ENSDARG00000052322	832.351	-1.03295	2.12924e-05	4.67178	695	403139	796.377	-1.00284	4.92303e-05	4.30777	26	827.677	-1.0249	6.80683e-05	4.16706	695	yes	yes	yes
tm4sf18	ENSDARG00000060668	418.167	-1.29301	1.52868e-09	8.81568	873	563601	417.811	-1.28951	2.36172e-09	8.62677	873	518.395	-1.24305	9.31192e-10	9.03096	2558	yes	yes	yes
tmem182a	ENSDARG00000040374	54.7753	-1.51963	0.0418639	1.37816	766	503742	54.1101	-1.50249	0.056512	1.24786	766	74.9432	-1.30572	0.0792432	1.10104	2844	yes	no	no
tmem88a	ENSDARG00000056920	606.998	-1.39008	9.76879e-08	7.01016	881	402969	545.602	-1.38816	2.95037e-07	6.53012	379	604.191	-1.38436	4.61499e-07	6.33583	881	yes	yes	yes
tmem88b	ENSDARG00000069388	426.418	-1.32654	9.75182e-06	5.01091	420	100004517		-1.35606	3.15292e-06	5.50129	1491	470.472	-1.37625	1.28185e-05	4.89216	1491	yes	yes	yes
tmigd1	ENSDARG00000007040					975	559127					372	209.22	-1.21263	0.00726679	2.13866	975	no	no	yes
tnfaip2b	ENSDARG00000058160	331.043	-1.24217	0.0198898	1.70137	254	569366	332.053	-1.23367	0.0265712	1.57559	211	330.042	-1.23196	0.0379077	1.42127	254	yes	yes	yes
tnnt3b	ENSDARG00000068457	2010.24	-1.09875	0.00055405	3.25645	315	100003572	1674.65	-1.12031	0.00148394	2.82858	315	2007.41	-1.09207	0.000881982	3.05454	315	yes	yes	yes
tpcn3	ENSDARG00000078959	1078.52	-1.28022	1.95227e-08	7.70946	107	557460	1077.86	-1.27879	2.65606e-08	7.57576	107	1139.42	-1.27066	2.93461e-08	7.53245	1263	yes	yes	yes
tpte	ENSDARG00000056985	774.89	-1.05131	1.52114e-06	5.81783	431	327292	779.164	-1.04208	2.93858e-06	5.53186	433	777.199	-1.02083	6.91737e-06	5.16006	433	yes	yes	yes
trim35-10	ENSDARG00000033071	95.3591	-2.44921	0.00927244	2.03281	2	799678	101.631	-2.54148	0.00697293	2.15658	54	94.9915	-2.46884	0.0171267	1.76633	2	yes	yes	yes
tyro3	ENSDARG00000005356	1015.21	-1.09643	3.59862e-06	5.44386	690	30709	1014.55	-1.09697	4.15885e-06	5.38103	690	1610.05	-1.08808	1.74332e-09	8.75862	8067	yes	yes	yes
UNC13A	ENSDARG00000061829	84.8181	-1.26673	0.0199904	1.69918	295	568618	101.974	-1.42881	0.00287912	2.54074	920	115.783	-1.41279	0.00121277	2.91622	3549	yes	yes	yes
uncx	ENSDARG00000102976	43.8945	-2.15136	0.00397296	2.40089	293	798510	57.4215	-2.53943	0.000120206	3.92007	1433	57.5621	-2.5913	0.000130066	3.88583	1433	yes	yes	yes
ushbp1	ENSDARG00000089071	1214.91	-1.19223	6.03232e-13	12.2195	2801	100148935	1097.34	-1.17001	1.9455e-12	11.711	232	1208.37	-1.18438	6.31206e-13	12.1998	2801	yes	yes	yes
vav3b	ENSDARG00000075962	22.4418	-3.08932	0.0145775	1.83632	619	559145	21.1189	-3.41712	0.0194358	1.7114	1553	21.046	-3.41401	0.0283873	1.54688	1553	yes	yes	yes
vav3b	ENSDARG00000073713					2614	559501				#NUM!	867	21.046	-3.41401	0.0283873	1.54688	2614	no	no	yes
wu:fa26c03	ENSDARG00000074306	766.779	-1.98193	0.125771	0.900419	238	564979	105.933	-1.7747	0.019707	1.70538	238	108.191	-1.87008	0.0224828	1.64815	238	no	yes	yes
xirp2a	ENSDARG00000071113	1863.03	-1.05697	2.86692e-06	5.54258	1496	559746	1568.19	-1.03726	5.02453e-05	4.2989	724	1858.76	-1.04951	2.5431e-06	5.59464	1496	yes	yes	yes
XKR4	ENSDARG00000104264	114.51	-0.614462	0.504886	0.296807	2298	777704	94.6801	-0.620533	0.62869	0.201563	311	514.553	-1.09959	3.14392e-05	4.50253	2298	no	no	yes
xkrx	ENSDARG00000044011	241.269	-1.04891	0.000186309	3.72977	1363	492765	239.609	-1.05999	0.000207409	3.68317	759	240.174	-1.04242	0.000376406	3.42434	1363	yes	yes	yes
zcchc14	ENSDARG00000101242	519.17	-1.13413	2.91287e-08	7.53568	264	796219	535.319	-1.08173	7.83047e-08	7.10621	804	516.53	-1.12915	6.33763e-08	7.19807	264	yes	yes	yes
zgc:100868	ENSDARG00000004748	213.825	-1.09407	0.020845	1.681	2603	554458	212.168	-1.09284	0.0227157	1.64367	1756	212.694	-1.09123	0.0304577	1.5163	2603	yes	yes	yes
zgc:101810	ENSDARG00000004658	296.317	-0.958026	0.0239299	1.62106	920	493612	267.906	-1.03869	0.0174673	1.75777	206	312.897	-0.919785	0.0411862	1.38525	2053	no	yes	no
zgc:110239	ENSDARG00000077664	2064.11	-1.06847	2.40488e-06	5.61891	175	550326	2036.08	-1.082	1.80797e-06	5.74281	175	2054.98	-1.06108	8.26789e-06	5.08261	175	yes	yes	yes
zgc:113363	ENSDARG00000101206	370.309	-0.962178	0.000503704	3.29782	1447	791449	438.894	-0.981577	0.000140983	3.85083	1447	405.197	-1.06468	4.68369e-05	4.32941	1447	no	no	yes
zgc:136930	ENSDARG00000055192	121.774	-1.96001	0.00425598	2.371	110	563946	122.411	-1.95289	0.00467679	2.33005	112	121.647	-1.95734	0.00699138	2.15544	112	yes	yes	yes
zgc:153184	ENSDARG00000099645	512.2	-1.20188	1.69649e-06	5.77045	1667	751652	350.153	-1.14169	6.48049e-05	4.18839	419	509.166	-1.19562	6.45125e-06	5.19036	1667	yes	yes	yes
zgc:154054	ENSDARG00000099923	108.239	-1.12154	0.0446853	1.34983	1012	777616	108.224	-1.12183	0.0510984	1.29159	1021	107.502	-1.0646	0.085651	1.06727	1021	yes	no	no
zgc:158482	ENSDARG00000067520	200.701	-1.08046	0.0200608	1.69765	100	100009650	221.483	-1.0093	0.0340037	1.46847	100	275.452	-0.759271	0.138571	0.858327	850	yes	yes	no
zgc:172053	ENSDARG00000038321	31.6702	-5.00211	0.000288349	3.54008	165	100002541	31.664	-4.00139	0.00443201	2.3534	165	31.5236	-6.47667	0.000121245	3.91633	165	yes	yes	yes
zgc:172122	ENSDARG00000079191	63.6963	-1.22004	0.105867	0.975241	350	571844	62.3711	-1.45672	0.0158148	1.80094	715	72.3523	-1.37007	0.0239896	1.61998	715	no	yes	yes
zgc:172282	ENSDARG00000105059	11.2168	-5.9473	0.0148826	1.82732	740	100003690	12.8638	-3.70276	0.0811922	1.09049	740	12.8067	-4.28013	0.0561523	1.25063	740	yes	no	no
zgc:172339	ENSDARG00000069190	9.24106	-5.66774	0.0296863	1.52744	1618	564384	9.24162	-5.66833	0.0357282	1.44699	1619	9.21205	-5.66348	0.049883	1.30205	1618	yes	yes	yes
zgc:174356	ENSDARG00000088263	12.2093	-6.0696	0.0086045	2.06527	306	100137120	13.1958	-6.18223	0.00797137	2.09847	306	13.1435	-6.17634	0.0125547	1.90119	306	yes	yes	yes
zgc:175248	ENSDARG00000104153	81.19	-1.85832	0.00998623	2.0006	101	565810	80.5237	-1.84708	0.0132756	1.87695	106	80.2622	-1.84356	0.0238894	1.62179	106	yes	yes	yes
zgc:193505	ENSDARG00000093584	248.105	-1.37218	0.0232783	1.63305	253	559113	246.748	-1.44617	0.0241548	1.617	641	246.059	-1.36354	0.0367369	1.4349	253	yes	yes	yes
zgc:85932	ENSDARG00000098239	143.851	-1.51312	0.00836892	2.07733	192	405875	149.111	-1.56545	0.0039069	2.40817	203	147.847	-1.56248	0.00576737	2.23902	203	yes	yes	yes
zgc:91860	ENSDARG00000041599	293.094	-1.05901	0.000132582	3.87751	1577	431740	292.758	-1.05449	0.00018905	3.72342	1451	291.861	-1.05318	0.000281224	3.55095	1577	yes	yes	yes
zgc:92481	ENSDARG00000073905	154.435	-1.09827	0.00986061	2.0061	632	447865	154.422	-1.0921	0.0125106	1.90272	629	265.959	-1.02395	0.00595512	2.22511	3337	yes	yes	yes
zic3	ENSDARG00000071497	1427.41	-1.16694	5.6449e-06	5.24834	2115	368263	1346.9	-1.14716	1.11057e-05	4.95446	1334	1421.2	-1.15958	1.87174e-05	4.72775	2115	yes	yes	yes
zic6	ENSDARG00000071496	239.617	-1.24437	1.60536e-05	4.79443	800	415097	270.618	-1.21084	1.28807e-05	4.89006	679	238.529	-1.24271	3.23443e-05	4.4902	800	yes	yes	yes
zmp:0000001114	ENSDARG00000100088	495.329	-1.13194	0.00011931	3.92332	4803	557248	481.083	-1.10725	0.000315018	3.50166	3106	488.24	-1.12179	0.000180628	3.74321	4803	yes	yes	yes
znf1078	ENSDARG00000098430	59.7399	-0.917297	0.343302	0.464324	564	565755	34.9891	-2.40898	0.0411158	1.38599	914	50.0062	-1.11831	0.360525	0.443064	564	no	yes	no
znf326	ENSDARG00000098348	88.1174	-2.41972	1.30502e-05	4.88438	875	571228	67.3261	-2.31831	0.000289103	3.53895	498	89.1391	-2.46451	2.50557e-05	4.60109	875	yes	yes	yes
ZNF512B	ENSDARG00000071055	45.8757	-2.07734	0.00414267	2.38272	530	101885988	46.5336	-2.09836	0.00450186	2.34661	618	61.1894	-2.14477	0.000559581	3.25214	10933	yes	yes	yes
