# Supplementary material for: An improved zebrafish transcriptome annotation for sensitive and comprehensive detection of cell type-specific genes
Source: eLife. 2020 Aug 24;9:e55792. doi: 10.7554/eLife.55792 (PMC7486121; doi:10.7554/eLife.55792)
Supplement: Figure 4—source data 1. [file elife-55792-fig4-data1.xlsx]

## Sheet: Sheet1
	Estimated Number of Cells	Mean Reads per Cell	Median Genes per Cell	Number of Reads	Valid Barcodes	Sequencing Saturation	Q30 Bases in Barcode	Q30 Bases in RNA Read	Q30 Bases in UMI	Reads Mapped to Genome	Reads Mapped Confidently to Genome	Reads Mapped Confidently to Intergenic Regions	Reads Mapped Confidently to Intronic Regions	Reads Mapped Confidently to Exonic Regions	Reads Mapped Confidently to Transcriptome	Reads Mapped Antisense to Gene	Fraction Reads in Cells	Total Genes Detected	Median UMI Counts per Cell
Ens95	14684	45675	761	670695224	0.976	0.836	0.983	0.852	0.984	0.959	0.945	0.048	0.054	0.844	0.807	0.006	0.823	24470	2352
V4.2	14883	45064	842	670695224	0.976	0.836	0.983	0.852	0.984	0.959	0.947	0.016	0.055	0.876	0.84	0.007	0.825	30573	2437
