# Supplementary material for: An improved zebrafish transcriptome annotation for sensitive and comprehensive detection of cell type-specific genes
Source: eLife. 2020 Aug 24;9:e55792. doi: 10.7554/eLife.55792 (PMC7486121; doi:10.7554/eLife.55792)
Supplement: Figure 4—source data 2. — The p-value, adjusted p-value, and average log2 fold change refer to comparison of indicated cluster with all other clusters. Cutoffs are adjp <0.05, log2 fold change >0.5. Pct.1 is proportion of cells within indicated cluster that express detectable levels of the indicated gene. Pct.2 is proportion of all other cells that express detectable levels of the indicated gene. Matching LL and Ensembl gene IDs are included. [file elife-55792-fig4-data2.xlsx]

## Sheet: Sheet1
gene	Ensdarg	LLgeneID	cluster	avg_logFC	p_val	p_val_adj	pct.1	pct.2
ifitm1	ENSDARG00000093303	LL0000012496	0	1.65608	0	0	0.762	0.231
rgs5a	ENSDARG00000002644	LL0000023616	0	1.2917	0	0	0.579	0.104
pmp22a	ENSDARG00000105223	LL0000022201	0	1.24781	0	0	0.961	0.386
hpdb	ENSDARG00000044935	LL0000012295	0	0.867159	1.047e-271	2.31167e-267	0.662	0.172
cxcl12a	ENSDARG00000037116	LL0000008486	0	1.70826	2.19226e-242	4.8403e-238	0.544	0.129
CABZ01092746.1	ENSDARG00000117319	LL0000004643	0	1.12852	9.63836e-240	2.12805e-235	0.539	0.124
ms4a17a.7	ENSDARG00000043796	LL0000019624	0	0.995712	3.69698e-235	8.16257e-231	0.443	0.083
hgd	ENSDARG00000058005	LL0000012078	0	0.896075	3.86861e-232	8.54149e-228	0.702	0.218
vim	ENSDARG00000010008	LL0000031854	0	1.20537	4.71182e-217	1.04032e-212	0.553	0.142
krt8	ENSDARG00000058358	LL0000013466	0	0.826515	1.70917e-208	3.77368e-204	0.915	0.458
krt18b	ENSDARG00000028618	LL0000013462	0	0.900987	1.25427e-198	2.76931e-194	0.766	0.292
zgc:153704	ENSDARG00000045979	LL0000038744	0	1.13374	6.16385e-195	1.36092e-190	0.56	0.157
rbp4	ENSDARG00000101199	LL0000023321	0	0.959907	6.09909e-187	1.34662e-182	0.917	0.523
ptgdsb.2	ENSDARG00000071626	LL0000022818	0	0.824029	2.20443e-165	4.86717e-161	0.695	0.293
socs3a	ENSDARG00000025428	LL0000029136	0	0.911207	3.77103e-165	8.32607e-161	0.878	0.478
cebpd	ENSDARG00000087303	LL0000005408	0	0.810215	2.21671e-164	4.89428e-160	0.96	0.6
fstl3	ENSDARG00000025670	LL0000010897	0	1.17746	7.58096e-160	1.6738e-155	0.45	0.119
ms4a17a.9	ENSDARG00000094854	LL0000019626	0	0.940112	1.15816e-159	2.55711e-155	0.533	0.173
cd81a	ENSDARG00000036080	LL0000005254	0	0.704838	3.0478e-159	6.72924e-155	0.916	0.528
krt18a.1	ENSDARG00000018404	LL0000013460	0	0.589531	9.49692e-154	2.09682e-149	0.749	0.309
mfap2	ENSDARG00000059367	LL0000018921	0	0.790357	3.54404e-153	7.82488e-149	0.595	0.214
si:ch1073-291c23.2	ENSDARG00000074869	LL0000024815	0	0.778901	9.56083e-149	2.11094e-144	0.473	0.145
abi3bpb	ENSDARG00000071095	LL0000000108	0	0.929359	1.03782e-147	2.29139e-143	0.376	0.089
tmem176	ENSDARG00000078659	LL0000030516	0	0.76297	1.1893e-146	2.62585e-142	0.656	0.258
si:ch211-251b21.1	ENSDARG00000007275	LL0000025837	0	0.934029	3.20176e-146	7.06917e-142	0.788	0.41
aspn	ENSDARG00000002192	LL0000001500	0	0.770302	1.89162e-142	4.1765e-138	0.286	0.052
col6a1	ENSDARG00000074908	LL0000006020	0	0.784077	8.7098e-142	1.92304e-137	0.409	0.108
fmoda	ENSDARG00000044895	LL0000010422	0	0.555506	4.01113e-134	8.85618e-130	0.491	0.151
bhmt	ENSDARG00000013430	LL0000001893	0	0.594884	2.94835e-132	6.50966e-128	0.81	0.407
junba	ENSDARG00000074378	LL0000013045	0	0.790698	8.9925e-130	1.98545e-125	0.87	0.547
fstl1b	ENSDARG00000039576	LL0000010896	0	0.743483	3.02754e-129	6.6845e-125	0.584	0.234
asip2b	ENSDARG00000114760	LL0000001485	0	1.12469	4.4276e-128	9.7757e-124	0.288	0.061
twist3	ENSDARG00000019646	LL0000031391	0	0.769028	3.75802e-127	8.29732e-123	0.29	0.062
fosab	ENSDARG00000031683	LL0000010566	0	0.738692	8.5086e-125	1.87861e-120	0.937	0.708
zgc:174904	ENSDARG00000059049	LL0000039063	0	0.814043	8.64563e-124	1.90887e-119	0.38	0.106
fstb	ENSDARG00000057992	LL0000010894	0	0.906386	4.71102e-119	1.04015e-114	0.308	0.074
gstz1	ENSDARG00000027984	LL0000011824	0	0.722171	1.52178e-117	3.35993e-113	0.609	0.28
ttc36	ENSDARG00000011693	LL0000031302	0	0.660406	3.75789e-117	8.29704e-113	0.409	0.124
jun	ENSDARG00000043531	LL0000013044	0	0.735952	6.82137e-117	1.50609e-112	0.83	0.504
mxra8b	ENSDARG00000062129	LL0000019789	0	0.663982	1.29512e-115	2.8595e-111	0.44	0.144
igf2b	ENSDARG00000033307	LL0000012531	0	0.678503	2.20606e-115	4.87076e-111	0.365	0.104
nsa2	ENSDARG00000007708	LL0000020644	0	0.537888	1.09327e-114	2.41383e-110	0.938	0.77
wnt11r	ENSDARG00000014796	LL0000032086	0	1.13189	3.23777e-110	7.14868e-106	0.322	0.086
cyp2ad2	ENSDARG00000021172	LL0000008573	0	0.951843	3.4362e-109	7.58678e-105	0.329	0.089
col12a1a	ENSDARG00000078322	LL0000005981	0	0.644854	3.11418e-107	6.87579e-103	0.385	0.119
eif4ebp3l	ENSDARG00000041607	LL0000009529	0	0.678823	1.50028e-106	3.31248e-102	0.854	0.569
tat	ENSDARG00000069630	LL0000029981	0	0.592185	6.62231e-106	1.46214e-101	0.408	0.13
aoc2	ENSDARG00000014646	LL0000001113	0	0.518453	1.0954e-105	2.41853e-101	0.52	0.206
ntd5	ENSDARG00000040944	LL0000020680	0	0.687582	1.09615e-103	2.42018e-99	0.456	0.162
cldn11a	ENSDARG00000020031	LL0000005757	0	0.777949	1.47789e-103	3.26304e-99	0.28	0.067
si:ch211-286o17.1	ENSDARG00000100446	LL0000026026	0	0.656337	2.20478e-103	4.86793e-99	0.479	0.182
col5a1	ENSDARG00000012593	LL0000006015	0	0.537089	3.29245e-100	7.2694e-96	0.554	0.228
sdc4	ENSDARG00000059906	LL0000024337	0	0.554181	3.03698e-98	6.70534e-94	0.824	0.51
cish	ENSDARG00000060316	LL0000005712	0	0.73855	2.66896e-97	5.8928e-93	0.491	0.211
cyp2ad3	ENSDARG00000022650	LL0000008574	0	0.772153	4.40579e-97	9.72754e-93	0.634	0.322
mych	ENSDARG00000077473	LL0000019810	0	0.702097	5.57849e-96	1.23167e-91	0.645	0.342
si:dkey-239h2.3	ENSDARG00000092033	LL0000027278	0	0.811133	6.84679e-96	1.5117e-91	0.569	0.28
fzd7b	ENSDARG00000027589	LL0000011028	0	0.635122	8.92447e-94	1.97043e-89	0.38	0.133
prrx1a	ENSDARG00000033971	LL0000022700	0	0.615471	2.94876e-92	6.51057e-88	0.299	0.084
cyr61	ENSDARG00000023062	LL0000008623	0	0.768776	3.12188e-90	6.8928e-86	0.575	0.263
hapln1a	ENSDARG00000089769	LL0000011928	0	0.613342	1.14392e-87	2.52565e-83	0.275	0.074
mab21l2	ENSDARG00000015266	LL0000018507	0	0.600579	2.53469e-87	5.59634e-83	0.329	0.105
si:ch211-212k18.8	ENSDARG00000086421	LL0000025551	0	0.583277	6.51905e-87	1.43934e-82	0.307	0.096
angptl1a	ENSDARG00000012071	LL0000000982	0	0.58481	5.04439e-83	1.11375e-78	0.299	0.089
zgc:162730	ENSDARG00000103720	LL0000038847	0	0.656975	6.42002e-82	1.41748e-77	0.848	0.549
rsl1d1	ENSDARG00000055868	LL0000024052	0	0.60637	2.12421e-80	4.69005e-76	0.613	0.359
nop53	ENSDARG00000100452	LL0000020473	0	0.550642	7.15252e-80	1.5792e-75	0.788	0.562
ptgdsb.1	ENSDARG00000027088	LL0000022817	0	0.587302	3.00935e-79	6.64434e-75	0.659	0.389
angptl4	ENSDARG00000035859	LL0000000987	0	0.620819	7.02403e-76	1.55083e-71	0.472	0.221
lpl	ENSDARG00000087697	LL0000018300	0	0.817607	9.86599e-76	2.17831e-71	0.443	0.197
fzd2	ENSDARG00000054438	LL0000011021	0	0.527185	1.8584e-75	4.10316e-71	0.314	0.107
sult6b1	ENSDARG00000086826	LL0000029672	0	0.612178	3.12441e-75	6.89838e-71	0.539	0.28
dcn	ENSDARG00000012066	LL0000008724	0	0.522907	4.28706e-75	9.46539e-71	0.341	0.121
thbs4b	ENSDARG00000020072	LL0000030266	0	0.744263	1.20611e-72	2.66297e-68	0.284	0.091
socs3b	ENSDARG00000026611	LL0000029137	0	0.659598	3.166e-70	6.99021e-66	0.504	0.255
cbx7a	ENSDARG00000038025	LL0000005004	0	0.532179	3.47493e-70	7.67231e-66	0.498	0.239
col6a3	ENSDARG00000077139		0	0.568298	8.02046e-69	1.77084e-64	0.255	0.079
ddit4	ENSDARG00000037618	LL0000008760	0	0.613665	4.52893e-67	9.99942e-63	0.326	0.123
eif4ebp3	ENSDARG00000054916	LL0000009528	0	0.508848	1.90211e-66	4.19967e-62	0.642	0.401
plpp3	ENSDARG00000059933	LL0000022153	0	0.598532	4.4598e-64	9.8468e-60	0.455	0.219
lxn	ENSDARG00000043102	LL0000018460	0	0.671352	4.28151e-63	9.45315e-59	0.56	0.319
si:dkey-12l12.1	ENSDARG00000094422	LL0000026730	0	0.567192	4.27565e-58	9.44021e-54	0.298	0.109
entpd1	ENSDARG00000045066	LL0000009666	0	0.523958	2.30582e-57	5.09102e-53	0.297	0.115
gbp	ENSDARG00000040059	LL0000011191	0	0.579115	5.19419e-50	1.14683e-45	0.508	0.299
ccl25b	ENSDARG00000070873	LL0000005126	0	0.979187	5.7998e-49	1.28054e-44	0.283	0.115
cyp2n13	ENSDARG00000042953	LL0000008588	0	0.524967	3.5464e-46	7.83011e-42	0.294	0.126
ier2a	ENSDARG00000099195	LL0000012474	0	0.608024	3.69475e-43	8.15763e-39	0.69	0.505
junbb	ENSDARG00000104773	LL0000013046	0	0.527134	3.38836e-33	7.48116e-29	0.396	0.242
klf2a	ENSDARG00000042667	LL0000013361	0	0.546608	7.67356e-31	1.69424e-26	0.268	0.133
si:ch73-335l21.4	ENSDARG00000091234	LL0000026464	0	0.697802	4.78461e-29	1.05639e-24	0.419	0.263
tubb5	ENSDARG00000037997	LL0000031360	1	2.274	0	0	0.677	0.077
elavl3	ENSDARG00000014420	LL0000009552	1	2.23831	0	0	0.843	0.109
stmn1b	ENSDARG00000033655	LL0000029570	1	2.14652	0	0	0.918	0.265
rtn1b	ENSDARG00000021143	LL0000024078	1	1.86871	0	0	0.633	0.076
rtn1a	ENSDARG00000006497	LL0000024077	1	1.81478	0	0	0.861	0.213
tmeff1b	ENSDARG00000056740	LL0000030438	1	1.73012	2.68948e-294	5.9381e-290	0.743	0.161
gpm6aa	ENSDARG00000055455	LL0000011571	1	1.67678	9.6836e-294	2.13804e-289	0.865	0.217
islr2	ENSDARG00000051875	LL0000012903	1	1.80937	4.63801e-291	1.02403e-286	0.357	0.025
zc4h2	ENSDARG00000015314	LL0000038356	1	1.87754	5.34049e-289	1.17913e-284	0.805	0.211
tuba1c	ENSDARG00000055216	LL0000031348	1	2.14204	2.08926e-285	4.61287e-281	0.884	0.288
gng3	ENSDARG00000009553	LL0000011473	1	1.59557	3.20142e-284	7.06841e-280	0.625	0.1
tmsb	ENSDARG00000054911	LL0000030688	1	2.05899	3.00653e-283	6.63812e-279	0.62	0.105
tuba1a	ENSDARG00000001889	LL0000031346	1	1.75904	3.05571e-277	6.7467e-273	0.779	0.186
cd99l2	ENSDARG00000056722	LL0000005262	1	1.6044	5.07803e-264	1.12118e-259	0.482	0.061
marcksb	ENSDARG00000008803	LL0000018674	1	1.59711	6.54719e-251	1.44556e-246	0.773	0.208
stmn2b	ENSDARG00000070537	LL0000029572	1	1.4587	1.45951e-246	3.22246e-242	0.375	0.035
fez1	ENSDARG00000023174	LL0000010267	1	1.28604	1.82318e-241	4.02539e-237	0.57	0.094
adcyap1b	ENSDARG00000027740	LL0000000322	1	1.63609	7.76408e-239	1.71423e-234	0.367	0.035
nova2	ENSDARG00000017673	LL0000020494	1	1.62921	1.86215e-238	4.11144e-234	0.765	0.209
ptmaa	ENSDARG00000021113	LL0000022859	1	1.59077	5.78233e-234	1.27668e-229	0.99	0.759
nsg2	ENSDARG00000102975	LL0000020653	1	1.27221	1.47238e-229	3.25087e-225	0.56	0.094
gpm6ab	ENSDARG00000004621	LL0000011572	1	1.76173	1.22053e-228	2.69482e-224	0.771	0.212
hmgb3a	ENSDARG00000056725	LL0000012172	1	1.7841	1.56807e-223	3.46215e-219	0.888	0.426
marcksl1b	ENSDARG00000035715	LL0000018676	1	1.51401	6.33413e-223	1.39851e-218	0.952	0.481
si:dkey-276j7.1	ENSDARG00000090872	LL0000027465	1	1.55863	2.01556e-220	4.45015e-216	0.691	0.185
hmgb1b	ENSDARG00000030479	LL0000012169	1	1.52269	1.47095e-217	3.24772e-213	0.922	0.44
elavl4	ENSDARG00000045639	LL0000009553	1	1.73235	1.63477e-215	3.60941e-211	0.474	0.072
gap43	ENSDARG00000099744	LL0000011137	1	1.41618	5.67695e-211	1.25341e-206	0.353	0.037
mllt11	ENSDARG00000071026	LL0000019371	1	1.36026	7.32441e-210	1.61716e-205	0.438	0.062
h3f3d	ENSDARG00000045248	LL0000011908	1	1.07574	1.53927e-207	3.39855e-203	0.984	0.922
si:dkey-12h9.6	ENSDARG00000056092	LL0000026728	1	0.998951	3.69488e-204	8.15793e-200	0.259	0.018
sox11b	ENSDARG00000095743	LL0000029180	1	1.8606	1.14036e-203	2.5178e-199	0.576	0.126
hmgn6	ENSDARG00000087636	LL0000012181	1	1.45092	2.09561e-203	4.6269e-199	0.95	0.696
marcksa	ENSDARG00000004049	LL0000018673	1	1.38072	1.55094e-202	3.42432e-198	0.566	0.118
nhlh2	ENSDARG00000025495	LL0000020294	1	1.45612	1.29406e-200	2.85715e-196	0.299	0.027
sox4a.1	ENSDARG00000004588		1	1.86479	5.78992e-198	1.27836e-193	0.635	0.159
hnrnpa0a	ENSDARG00000089302	LL0000012203	1	1.58421	1.15412e-192	2.54819e-188	0.747	0.265
ptmab	ENSDARG00000101766	LL0000022860	1	1.34726	7.49367e-186	1.65453e-181	0.976	0.858
h2afx1	ENSDARG00000068995	LL0000011903	1	1.52377	4.23849e-183	9.35816e-179	0.908	0.569
zgc:101840	ENSDARG00000033201	LL0000038469	1	1.00381	3.3734e-181	7.44813e-177	0.321	0.036
hnrnpaba	ENSDARG00000007960	LL0000012209	1	1.32539	1.83675e-180	4.05535e-176	0.924	0.739
ctnnbip1	ENSDARG00000038954	LL0000007742	1	1.59914	3.26176e-180	7.20164e-176	0.522	0.114
gng2	ENSDARG00000056831	LL0000011472	1	1.42432	7.30519e-177	1.61291e-172	0.518	0.11
tuba2	ENSDARG00000045014	LL0000031349	1	0.990668	5.56966e-176	1.22973e-171	0.277	0.026
mbd3b	ENSDARG00000061810	LL0000018722	1	1.27829	4.0223e-175	8.88083e-171	0.558	0.13
cirbpb	ENSDARG00000013351	LL0000005709	1	1.14419	7.56153e-173	1.66951e-168	0.954	0.855
h3f3c	ENSDARG00000033009	LL0000011907	1	1.14408	7.9571e-168	1.75685e-163	0.948	0.767
stmn2a	ENSDARG00000033234	LL0000029571	1	1.16553	3.25377e-167	7.18399e-163	0.315	0.038
si:dkey-56m19.5	ENSDARG00000068432	LL0000027754	1	1.3726	2.07394e-165	4.57904e-161	0.596	0.161
tubb2b	ENSDARG00000098591	LL0000031358	1	1.45123	7.83947e-164	1.73088e-159	0.825	0.375
chd4a	ENSDARG00000063535	LL0000005573	1	1.40643	6.64629e-158	1.46743e-153	0.502	0.119
celf3a	ENSDARG00000034668	LL0000005417	1	0.993052	6.49399e-157	1.43381e-152	0.371	0.057
barhl2	ENSDARG00000104361	LL0000001796	1	1.72624	3.64524e-156	8.04833e-152	0.297	0.037
myt1b	ENSDARG00000102879	LL0000019922	1	0.939353	1.268e-152	2.79962e-148	0.287	0.034
cnrip1a	ENSDARG00000091683	LL0000005931	1	0.881541	1.27909e-152	2.82411e-148	0.293	0.035
si:ch211-222l21.1	ENSDARG00000076532	LL0000025644	1	1.26885	2.1162e-152	4.67236e-148	0.882	0.517
fscn1a	ENSDARG00000059680	LL0000010884	1	1.21036	1.02256e-149	2.25772e-145	0.468	0.105
tmsb2	ENSDARG00000092970	LL0000030690	1	1.20693	1.97068e-142	4.35107e-138	0.323	0.048
sncb	ENSDARG00000104945	LL0000029053	1	1.11843	3.85731e-142	8.51655e-138	0.363	0.061
ywhah	ENSDARG00000005560	LL0000038282	1	1.41915	7.6784e-142	1.69531e-137	0.625	0.216
si:ch73-1a9.3	ENSDARG00000103919	LL0000026297	1	0.894507	1.5586e-141	3.44124e-137	0.974	0.86
si:ch211-288g17.3	ENSDARG00000070959	LL0000026030	1	1.30421	5.05304e-136	1.11566e-131	0.767	0.369
sox11a	ENSDARG00000077811	LL0000029179	1	1.84397	1.06925e-132	2.36079e-128	0.536	0.161
nat8l	ENSDARG00000077256	LL0000020000	1	0.997275	6.53406e-132	1.44266e-127	0.273	0.037
smarce1	ENSDARG00000016871	LL0000028959	1	1.2838	2.27969e-130	5.03334e-126	0.703	0.317
csdc2a	ENSDARG00000041323	LL0000007420	1	0.961432	5.42543e-129	1.19788e-124	0.311	0.048
khdrbs1a	ENSDARG00000052856	LL0000013267	1	1.14295	5.81965e-129	1.28492e-124	0.876	0.683
snap25a	ENSDARG00000020609	LL0000029040	1	1.07651	1.09705e-128	2.42218e-124	0.295	0.043
dpysl3	ENSDARG00000002587	LL0000009183	1	0.93664	1.49219e-124	3.29461e-120	0.311	0.051
hnrnpa0l.1	ENSDARG00000036161	LL0000039827	1	0.99644	2.63196e-121	5.81111e-117	0.882	0.766
nkain1	ENSDARG00000006859	LL0000020354	1	1.06415	1.99069e-120	4.39525e-116	0.386	0.086
hp1bp3	ENSDARG00000044669	LL0000012290	1	1.22937	8.56241e-119	1.89049e-114	0.701	0.34
cfl1	ENSDARG00000021124	LL0000005532	1	0.967921	2.1963e-117	4.84921e-113	0.9	0.72
sumo3a	ENSDARG00000028119	LL0000029678	1	1.13595	2.46757e-117	5.44815e-113	0.795	0.494
lmo3	ENSDARG00000008720	LL0000013736	1	1.70492	8.84762e-116	1.95347e-111	0.319	0.059
hmgb1a	ENSDARG00000099175	LL0000012168	1	1.10822	5.72322e-115	1.26363e-110	0.827	0.508
tmed4	ENSDARG00000024954	LL0000030431	1	0.885112	2.76815e-111	6.11179e-107	0.321	0.061
ssbp3b	ENSDARG00000030155	LL0000029420	1	1.19596	8.37737e-110	1.84964e-105	0.486	0.151
ebf3a.1	ENSDARG00000100244	LL0000039792	1	1.79834	4.95879e-108	1.09485e-103	0.422	0.114
pacsin1b	ENSDARG00000042128	LL0000021205	1	0.869865	6.83722e-107	1.50959e-102	0.275	0.046
cbx1b	ENSDARG00000054442	LL0000004996	1	1.22351	1.11655e-105	2.46523e-101	0.432	0.121
hmgn7	ENSDARG00000062326	LL0000012182	1	0.823114	1.58858e-105	3.50742e-101	0.902	0.722
nfil3-5	ENSDARG00000094965	LL0000020260	1	0.898203	1.50284e-104	3.31812e-100	0.277	0.048
id4	ENSDARG00000045131	LL0000012463	1	1.11116	3.30359e-103	7.294e-99	0.253	0.04
h3f3b.1	ENSDARG00000020504	LL0000039823	1	0.838428	3.88421e-103	8.57594e-99	0.851	0.61
basp1	ENSDARG00000053358	LL0000001799	1	1.05724	4.21964e-103	9.31654e-99	0.305	0.058
zgc:65894	ENSDARG00000016301	LL0000039196	1	0.867027	2.81062e-99	6.20557e-95	0.265	0.045
pou3f3b	ENSDARG00000095896	LL0000022337	1	0.974682	2.2001e-97	4.8576e-93	0.271	0.049
dpysl5a	ENSDARG00000011141	LL0000009185	1	0.793215	3.05922e-97	6.75446e-93	0.253	0.042
tmem59l	ENSDARG00000003655	LL0000030634	1	0.944545	1.11968e-92	2.47213e-88	0.255	0.045
mex3b	ENSDARG00000058369	LL0000018918	1	1.03074	8.37948e-92	1.8501e-87	0.4	0.114
hdac1	ENSDARG00000015427	LL0000011987	1	1.14009	5.95054e-91	1.31382e-86	0.645	0.34
ing4	ENSDARG00000030716	LL0000012749	1	1.10817	2.79252e-89	6.1656e-85	0.53	0.217
hnrnpa0b	ENSDARG00000036162	LL0000012204	1	1.06541	3.88327e-87	8.57387e-83	0.765	0.546
fam168a	ENSDARG00000098832	LL0000010014	1	1.09547	3.37113e-86	7.44312e-82	0.54	0.226
nucks1a	ENSDARG00000078473	LL0000020711	1	1.07857	1.6407e-85	3.62251e-81	0.657	0.361
si:dkeyp-75h12.5	ENSDARG00000089877	LL0000028256	1	1.00915	4.42618e-85	9.77256e-81	0.424	0.135
h3f3b.1.1	ENSDARG00000068436	LL0000040151	1	0.959285	5.30912e-85	1.1722e-80	0.769	0.548
rgmb	ENSDARG00000079323	LL0000023593	1	1.07841	1.70666e-84	3.76814e-80	0.311	0.075
rcc2	ENSDARG00000011510	LL0000023346	1	1.13819	4.01256e-83	8.85934e-79	0.48	0.184
coro1cb	ENSDARG00000021193	LL0000006085	1	0.809857	5.18153e-83	1.14403e-78	0.273	0.057
ywhag2	ENSDARG00000071658	LL0000038281	1	1.00258	2.15286e-81	4.75329e-77	0.317	0.077
hnrnpabb	ENSDARG00000099865	LL0000012210	1	1.03501	2.93508e-81	6.48037e-77	0.729	0.502
cirbpa	ENSDARG00000103672	LL0000005708	1	0.78758	3.38087e-81	7.46462e-77	0.853	0.703
epb41a	ENSDARG00000099283	LL0000009686	1	0.826642	8.31856e-81	1.83666e-76	0.44	0.14
pou3f1	ENSDARG00000009823	LL0000022333	1	1.39478	2.96921e-80	6.55572e-76	0.297	0.07
bcl7a	ENSDARG00000052907	LL0000001851	1	0.960443	1.02419e-79	2.26132e-75	0.363	0.105
hmgb2b	ENSDARG00000053990	LL0000012171	1	0.759208	3.87977e-78	8.56615e-74	0.815	0.581
oaz1b	ENSDARG00000104782	LL0000020797	1	0.899567	1.34906e-77	2.97858e-73	0.749	0.534
fkbp1aa	ENSDARG00000022684	LL0000010373	1	0.797545	2.13491e-76	4.71366e-72	0.833	0.73
mab21l1	ENSDARG00000102047	LL0000018506	1	1.25854	5.11337e-74	1.12898e-69	0.355	0.107
cdkn1ca	ENSDARG00000010878	LL0000005381	1	0.888119	2.52068e-73	5.56542e-69	0.285	0.069
si:ch211-51e12.7	ENSDARG00000045914	LL0000026057	1	1.01554	1.88853e-71	4.16969e-67	0.568	0.291
hnrnpr	ENSDARG00000014569	LL0000012221	1	1.0399	2.46439e-71	5.44112e-67	0.484	0.21
ywhabl	ENSDARG00000040287	LL0000038277	1	0.871062	7.14752e-68	1.5781e-63	0.721	0.51
fus	ENSDARG00000037968	LL0000010997	1	0.760483	1.19611e-67	2.64089e-63	0.269	0.066
sumo2b	ENSDARG00000102741	LL0000029677	1	0.884306	8.00722e-66	1.76791e-61	0.755	0.609
si:ch211-137a8.4	ENSDARG00000078748	LL0000025074	1	0.819923	1.74405e-63	3.85068e-59	0.458	0.177
calm3b	ENSDARG00000074057	LL0000004820	1	0.843407	1.79455e-63	3.96219e-59	0.747	0.565
pop7	ENSDARG00000036394	LL0000022320	1	0.848284	2.39565e-63	5.28936e-59	0.341	0.111
ubc	ENSDARG00000102632	LL0000031461	1	0.739963	3.28279e-61	7.24808e-57	0.815	0.715
rbm4.3	ENSDARG00000022129	LL0000023298	1	0.881968	5.92998e-61	1.30928e-56	0.661	0.451
ppiab	ENSDARG00000103994	LL0000022373	1	0.561992	1.17877e-60	2.60261e-56	0.886	0.852
celf2	ENSDARG00000002131	LL0000005416	1	0.986101	1.74244e-60	3.84713e-56	0.408	0.163
si:dkey-81l17.6	ENSDARG00000097322	LL0000027947	1	0.670824	6.73042e-60	1.48601e-55	0.253	0.063
tia1	ENSDARG00000052536	LL0000030301	1	0.806245	6.32463e-59	1.39641e-54	0.273	0.077
ptp4a1	ENSDARG00000006242	LL0000022862	1	0.930632	1.87367e-58	4.13687e-54	0.562	0.32
ilf2	ENSDARG00000014591	LL0000012693	1	0.974926	2.26539e-58	5.00175e-54	0.506	0.26
h2afvb	ENSDARG00000116491	LL0000011901	1	0.79158	2.36749e-58	5.22719e-54	0.737	0.546
g3bp2	ENSDARG00000014790	LL0000011038	1	0.751578	2.88933e-58	6.37935e-54	0.267	0.074
ppdpfb	ENSDARG00000031317	LL0000022360	1	0.619995	1.09901e-57	2.4265e-53	0.914	0.845
ewsr1a	ENSDARG00000020258	LL0000009858	1	0.875894	1.3971e-57	3.08465e-53	0.384	0.151
ilf3b	ENSDARG00000105177	LL0000012695	1	0.975978	1.85415e-57	4.09377e-53	0.432	0.192
cnp	ENSDARG00000070822	LL0000005923	1	0.945805	2.42539e-56	5.35501e-52	0.367	0.142
syncrip	ENSDARG00000040184	LL0000029743	1	0.893346	2.31768e-55	5.11721e-51	0.653	0.472
hmga1a	ENSDARG00000028335	LL0000012165	1	0.552771	1.99187e-54	4.39785e-50	0.789	0.583
appa	ENSDARG00000104279	LL0000001201	1	0.908992	6.76544e-54	1.49374e-49	0.42	0.184
olfm1b	ENSDARG00000014053	LL0000020861	1	0.689201	7.47768e-54	1.651e-49	0.261	0.071
atrx	ENSDARG00000042236	LL0000001672	1	0.970837	1.26542e-53	2.79392e-49	0.42	0.193
tardbp	ENSDARG00000040031	LL0000029965	1	0.852862	3.87326e-53	8.55177e-49	0.376	0.152
dpf2l	ENSDARG00000037291	LL0000009156	1	0.775684	1.63771e-52	3.61589e-48	0.273	0.084
mapre1b	ENSDARG00000002659	LL0000018656	1	0.783568	2.07082e-52	4.57217e-48	0.323	0.115
elmo1	ENSDARG00000098753	LL0000009566	1	0.801088	3.12398e-51	6.89744e-47	0.267	0.08
pbx3b	ENSDARG00000013615	LL0000021345	1	1.17119	5.77295e-51	1.27461e-46	0.301	0.102
gnb1b	ENSDARG00000104372	LL0000011458	1	0.71033	6.33325e-50	1.39832e-45	0.604	0.399
marcksl1a	ENSDARG00000039034	LL0000018675	1	0.756618	1.52328e-49	3.36325e-45	0.629	0.391
neurod1	ENSDARG00000019566	LL0000020224	1	1.59422	2.29264e-49	5.06192e-45	0.295	0.098
hes6	ENSDARG00000019335	LL0000012068	1	0.846869	1.24932e-48	2.75837e-44	0.279	0.089
hnrnpl	ENSDARG00000035324	LL0000012218	1	0.817335	1.90135e-48	4.198e-44	0.305	0.11
h2afy2	ENSDARG00000087897	LL0000011905	1	0.903945	6.43776e-48	1.42139e-43	0.594	0.409
fundc1	ENSDARG00000040822	LL0000010992	1	0.818631	1.23723e-46	2.73167e-42	0.363	0.155
pbx1a	ENSDARG00000100494	LL0000021341	1	0.946239	2.10946e-46	4.65748e-42	0.295	0.104
sinhcafl.1	ENSDARG00000078118		1	0.742776	2.596e-46	5.73171e-42	0.384	0.161
rbfox2	ENSDARG00000052182	LL0000023264	1	0.850422	6.2177e-46	1.37281e-41	0.357	0.153
bcl2l10	ENSDARG00000026766	LL0000001843	1	0.693098	1.78977e-45	3.95163e-41	0.347	0.137
atp6v0cb	ENSDARG00000036577	LL0000001634	1	0.720241	4.05491e-45	8.95284e-41	0.402	0.168
actl6a	ENSDARG00000070828	LL0000000224	1	0.748405	3.26439e-44	7.20745e-40	0.327	0.132
atpv0e2	ENSDARG00000059057	LL0000001665	1	0.640371	1.09257e-43	2.41227e-39	0.404	0.172
srsf9	ENSDARG00000008097	LL0000029412	1	0.856553	2.12679e-43	4.69574e-39	0.406	0.204
h3f3b.1.2	ENSDARG00000068434		1	0.709916	9.28609e-43	2.05028e-38	0.679	0.545
nr2f1a	ENSDARG00000052695	LL0000020582	1	1.2	3.45335e-42	7.62465e-38	0.315	0.125
pak2b	ENSDARG00000018476	LL0000021223	1	0.831062	6.08072e-42	1.34256e-37	0.307	0.123
cxxc5a	ENSDARG00000078865	LL0000008510	1	0.908019	6.52922e-42	1.44159e-37	0.305	0.12
hmgn3	ENSDARG00000036754	LL0000012180	1	0.845031	1.75537e-41	3.87568e-37	0.5	0.299
zfhx3	ENSDARG00000103057	LL0000038414	1	1.15444	1.11765e-40	2.46767e-36	0.309	0.129
smarcb1b	ENSDARG00000011594	LL0000028951	1	0.653339	1.9177e-40	4.23409e-36	0.257	0.09
fabp3	ENSDARG00000023290	LL0000009939	1	0.566009	1.97918e-40	4.36983e-36	0.717	0.533
nfyba	ENSDARG00000039185	LL0000020280	1	0.77867	5.55011e-40	1.22541e-35	0.392	0.195
dnaja2b	ENSDARG00000010745	LL0000009041	1	0.731657	6.86849e-40	1.51649e-35	0.347	0.154
nono	ENSDARG00000020482	LL0000020468	1	0.875978	1.3972e-39	3.08488e-35	0.436	0.242
ptp4a2a	ENSDARG00000087443	LL0000022863	1	0.712571	2.12987e-39	4.70254e-35	0.281	0.106
rbm8a	ENSDARG00000016516	LL0000023308	1	0.690763	2.02148e-38	4.46324e-34	0.618	0.473
rnasekb	ENSDARG00000104458	LL0000023741	1	0.604494	1.51721e-37	3.34984e-33	0.444	0.217
zfhx4	ENSDARG00000075542	LL0000038415	1	1.00585	1.65727e-37	3.65908e-33	0.323	0.139
jpt1b	ENSDARG00000099312	LL0000013041	1	0.822311	1.23017e-36	2.7161e-32	0.432	0.241
kdm1a	ENSDARG00000060679	LL0000013238	1	0.863833	4.2611e-36	9.40809e-32	0.398	0.214
calr	ENSDARG00000076290	LL0000004825	1	0.888531	5.91594e-36	1.30618e-31	0.359	0.177
srsf3b	ENSDARG00000059360	LL0000029404	1	0.781036	1.09286e-35	2.41293e-31	0.52	0.351
dynll1	ENSDARG00000058454	LL0000009312	1	0.657895	1.30284e-35	2.87655e-31	0.643	0.487
cdc34b	ENSDARG00000012627	LL0000005281	1	0.775832	1.84319e-35	4.06957e-31	0.287	0.119
mlf2	ENSDARG00000034616	LL0000019366	1	0.766761	4.5526e-35	1.00517e-30	0.392	0.209
hnrnph1l	ENSDARG00000005551	LL0000012215	1	0.713642	6.12943e-35	1.35332e-30	0.351	0.17
rbbp4	ENSDARG00000029058	LL0000023255	1	0.776509	8.53666e-35	1.88481e-30	0.331	0.151
ap3s2	ENSDARG00000039882	LL0000001138	1	0.665305	2.44878e-34	5.40666e-30	0.309	0.134
h2afva	ENSDARG00000068820	LL0000011900	1	0.648963	3.78141e-33	8.34898e-29	0.508	0.325
cited4b	ENSDARG00000101009	LL0000005719	1	0.6952	6.31964e-33	1.39531e-28	0.291	0.125
tcea1	ENSDARG00000003531	LL0000030066	1	0.737301	3.25307e-32	7.18246e-28	0.376	0.204
lsm6	ENSDARG00000036995	LL0000018436	1	0.775374	5.07957e-32	1.12152e-27	0.418	0.248
ube2e3	ENSDARG00000012244	LL0000031474	1	0.74557	7.67052e-32	1.69357e-27	0.526	0.381
ldb1a	ENSDARG00000010137	LL0000013573	1	0.661836	1.64239e-31	3.62622e-27	0.287	0.126
ube2e1	ENSDARG00000116649	LL0000031472	1	0.762242	7.38504e-31	1.63054e-26	0.408	0.244
seta	ENSDARG00000031495	LL0000024527	1	0.591703	2.72244e-30	6.01086e-26	0.606	0.463
ctnnb1	ENSDARG00000014571	LL0000007740	1	1.03549	5.61186e-30	1.23904e-25	0.496	0.372
rtn4b	ENSDARG00000104347	LL0000024083	1	0.555284	2.04245e-29	4.50953e-25	0.259	0.104
ube2e2	ENSDARG00000034670	LL0000031473	1	0.769575	3.8029e-29	8.39642e-25	0.359	0.197
brd3b	ENSDARG00000100129	LL0000002002	1	0.782787	3.90297e-29	8.61737e-25	0.361	0.2
LEPROTL1	ENSDARG00000104871	LL0000013606	1	0.710629	1.63923e-28	3.61925e-24	0.38	0.218
tp53inp2	ENSDARG00000088178	LL0000030852	1	0.605593	2.5143e-28	5.55133e-24	0.253	0.105
hnrnpub	ENSDARG00000004735	LL0000012223	1	0.689256	2.92565e-28	6.45955e-24	0.285	0.133
smarcd1	ENSDARG00000019004	LL0000028955	1	0.633541	3.60345e-28	7.95605e-24	0.303	0.145
setb	ENSDARG00000003920	LL0000024528	1	0.557255	4.3351e-28	9.57146e-24	0.631	0.52
calm2b	ENSDARG00000015050	LL0000004818	1	0.631405	6.97042e-28	1.539e-23	0.699	0.613
snrpb	ENSDARG00000011125	LL0000029075	1	0.583962	2.5951e-27	5.72973e-23	0.574	0.446
hnrnpc	ENSDARG00000053810	LL0000012211	1	0.666961	2.68227e-27	5.92218e-23	0.271	0.125
BX465834.1	ENSDARG00000095715	LL0000002752	1	0.533579	4.07999e-27	9.00821e-23	0.253	0.104
atf7ip	ENSDARG00000069619	LL0000001532	1	0.721838	1.1705e-26	2.58434e-22	0.38	0.227
snrpd3l	ENSDARG00000076283	LL0000029081	1	0.73934	1.6383e-26	3.61719e-22	0.414	0.267
dynlrb1	ENSDARG00000021582		1	0.663335	1.68303e-26	3.71596e-22	0.484	0.349
serinc1	ENSDARG00000009106	LL0000024488	1	0.704286	1.70222e-26	3.75833e-22	0.452	0.293
si:ch211-133n4.4	ENSDARG00000071224	LL0000025059	1	0.689224	9.04689e-26	1.99746e-21	0.398	0.237
tox	ENSDARG00000032317	LL0000030839	1	0.596318	1.22927e-25	2.7141e-21	0.259	0.116
cbx5	ENSDARG00000061187	LL0000005001	1	0.699032	6.96184e-25	1.5371e-20	0.494	0.364
nudt21	ENSDARG00000003153	LL0000020726	1	0.641946	5.96064e-24	1.31605e-19	0.335	0.192
bud31	ENSDARG00000017084	LL0000002096	1	0.684979	2.10099e-23	4.63878e-19	0.442	0.317
rbfox1	ENSDARG00000014746	LL0000023262	1	0.87782	5.44069e-23	1.20125e-18	0.277	0.141
palm1b	ENSDARG00000007818	LL0000021233	1	0.662722	7.22935e-23	1.59617e-18	0.271	0.133
ankrd12	ENSDARG00000052419	LL0000001018	1	0.574021	9.43325e-23	2.08277e-18	0.259	0.125
pbx4	ENSDARG00000052150	LL0000021346	1	0.74937	3.06519e-22	6.76764e-18	0.313	0.18
hnrpkl	ENSDARG00000007034	LL0000012227	1	0.66963	3.4548e-22	7.62786e-18	0.309	0.173
arf5	ENSDARG00000070472	LL0000001240	1	0.713798	6.29299e-22	1.38943e-17	0.444	0.33
zgc:56676	ENSDARG00000029445	LL0000039176	1	0.5949	1.3561e-21	2.99413e-17	0.572	0.511
rnf44	ENSDARG00000068582	LL0000023830	1	0.760078	3.00006e-21	6.62384e-17	0.315	0.183
ywhae1	ENSDARG00000006399	LL0000038278	1	0.701439	3.42402e-21	7.5599e-17	0.472	0.371
snrpf	ENSDARG00000105037	LL0000029083	1	0.591901	5.20679e-21	1.14961e-16	0.46	0.341
cbx3a	ENSDARG00000003860	LL0000004998	1	0.573491	8.68793e-21	1.91821e-16	0.492	0.379
apex1	ENSDARG00000045843	LL0000001162	1	0.634453	1.04428e-20	2.30568e-16	0.325	0.192
snrpc	ENSDARG00000009871	LL0000029077	1	0.646065	1.27359e-20	2.81197e-16	0.331	0.201
rimkla	ENSDARG00000016830	LL0000023689	1	0.526454	2.46209e-20	5.43604e-16	0.253	0.126
si:dkey-28b4.7	ENSDARG00000079632	LL0000027520	1	0.638466	2.82703e-20	6.2418e-16	0.384	0.255
psma3	ENSDARG00000086618	LL0000022734	1	0.643234	2.93827e-20	6.4874e-16	0.434	0.32
atp6v1e1b	ENSDARG00000030694	LL0000001646	1	0.507805	5.3306e-20	1.17694e-15	0.331	0.189
snrpd2	ENSDARG00000040440	LL0000029079	1	0.666857	6.13496e-20	1.35454e-15	0.454	0.345
psmd8	ENSDARG00000020454	LL0000022778	1	0.639916	2.35422e-19	5.19788e-15	0.281	0.158
ifrd1	ENSDARG00000068708	LL0000012508	1	0.671475	2.84981e-19	6.2921e-15	0.333	0.209
smarca4a	ENSDARG00000077226	LL0000028945	1	0.665267	4.59919e-19	1.01545e-14	0.259	0.14
vdac1	ENSDARG00000045132	LL0000031826	1	0.544944	5.78065e-19	1.27631e-14	0.546	0.47
psmb1	ENSDARG00000009640	LL0000022741	1	0.647181	7.23127e-19	1.59659e-14	0.43	0.326
ube2d2	ENSDARG00000043484	LL0000031468	1	0.538883	1.12458e-18	2.48296e-14	0.518	0.434
pfn2l	ENSDARG00000012682	LL0000021645	1	0.585365	1.19944e-18	2.64825e-14	0.47	0.369
elocb	ENSDARG00000045359	LL0000009579	1	0.585639	2.36512e-18	5.22195e-14	0.474	0.383
sf3b5	ENSDARG00000016855	LL0000024557	1	0.672955	3.50415e-18	7.73682e-14	0.353	0.238
znf346	ENSDARG00000060695	LL0000039586	1	0.655197	4.96809e-18	1.0969e-13	0.311	0.195
psmb7	ENSDARG00000037962	LL0000022752	1	0.606394	1.22049e-17	2.69473e-13	0.45	0.354
hist2h2l	ENSDARG00000068996	LL0000012137	1	0.677895	1.60402e-17	3.54151e-13	0.375	0.255
psmc1a	ENSDARG00000030537	LL0000022755	1	0.598856	2.52528e-17	5.57557e-13	0.271	0.156
chd4b	ENSDARG00000025789	LL0000005574	1	0.723548	2.99931e-17	6.62217e-13	0.371	0.261
kmt5aa	ENSDARG00000105231	LL0000013430	1	0.650993	3.08733e-17	6.81652e-13	0.301	0.188
sap18	ENSDARG00000057854	LL0000024197	1	0.617479	3.13764e-17	6.92759e-13	0.428	0.335
snrpd1	ENSDARG00000011648	LL0000029078	1	0.55112	4.05902e-17	8.96191e-13	0.444	0.335
brk1	ENSDARG00000041974	LL0000002020	1	0.638131	5.83635e-17	1.28861e-12	0.438	0.349
eny2	ENSDARG00000070046	LL0000009677	1	0.591384	9.60795e-17	2.12134e-12	0.255	0.145
h1f0	ENSDARG00000038559	LL0000011896	1	0.63018	1.03379e-16	2.28252e-12	0.582	0.478
cpsf6	ENSDARG00000018618	LL0000006171	1	0.648777	1.22695e-16	2.70897e-12	0.313	0.203
erh	ENSDARG00000032866	LL0000009780	1	0.54662	9.80842e-16	2.1656e-11	0.524	0.473
smc1al	ENSDARG00000058203	LL0000028961	1	0.595969	1.02518e-15	2.26349e-11	0.347	0.237
rfxap	ENSDARG00000076891	LL0000023586	1	0.518993	2.95049e-15	6.5144e-11	0.317	0.208
psmb6	ENSDARG00000002240	LL0000022751	1	0.544341	3.63955e-15	8.03575e-11	0.446	0.368
elof1	ENSDARG00000099453	LL0000009580	1	0.531636	3.8074e-15	8.40636e-11	0.418	0.32
sfpq	ENSDARG00000011564	LL0000024562	1	0.566665	4.96492e-15	1.0962e-10	0.271	0.165
ssbp4	ENSDARG00000056483	LL0000029421	1	0.606215	7.85245e-15	1.73374e-10	0.251	0.146
meaf6	ENSDARG00000101216	LL0000018815	1	0.62861	9.7935e-15	2.16231e-10	0.434	0.358
dynlt3	ENSDARG00000046132	LL0000009317	1	0.53366	1.89114e-14	4.17545e-10	0.369	0.271
sumo1	ENSDARG00000044267	LL0000029675	1	0.55692	2.14724e-14	4.74089e-10	0.41	0.327
rab11a	ENSDARG00000041450	LL0000023013	1	0.616562	2.596e-14	5.73171e-10	0.281	0.182
csnk2b	ENSDARG00000077776	LL0000007451	1	0.518915	2.79673e-14	6.17489e-10	0.476	0.415
rbmx	ENSDARG00000014244	LL0000023314	1	0.575166	3.5091e-14	7.74774e-10	0.281	0.178
sub1a	ENSDARG00000053446	LL0000029641	1	0.522445	5.20402e-14	1.14899e-09	0.474	0.397
ddx39aa	ENSDARG00000006225	LL0000008781	1	0.587429	6.24494e-14	1.37882e-09	0.357	0.265
dctn3	ENSDARG00000041363	LL0000008737	1	0.531567	1.07062e-13	2.36381e-09	0.305	0.206
ddx39ab	ENSDARG00000015111	LL0000008782	1	0.580963	1.2314e-13	2.7188e-09	0.365	0.272
calm2a	ENSDARG00000031427	LL0000004817	1	0.53915	1.28473e-13	2.83655e-09	0.512	0.453
taf12	ENSDARG00000104030	LL0000029917	1	0.523945	2.7007e-13	5.96288e-09	0.412	0.334
srsf4	ENSDARG00000105293	LL0000029405	1	0.504701	1.07556e-12	2.37473e-08	0.261	0.164
snw1	ENSDARG00000091563	LL0000029093	1	0.545303	1.48082e-12	3.26949e-08	0.317	0.227
tnrc6c1	ENSDARG00000076847	LL0000030790	1	0.645427	2.10526e-12	4.6482e-08	0.432	0.371
calm3a	ENSDARG00000021811	LL0000039771	1	0.550097	2.12831e-12	4.6991e-08	0.476	0.4
hnrnpl2	ENSDARG00000059303	LL0000012219	1	0.622252	2.36289e-12	5.21701e-08	0.299	0.209
ube2ia	ENSDARG00000052649	LL0000031480	1	0.529131	2.99841e-12	6.62019e-08	0.313	0.222
id2a	ENSDARG00000055283	LL0000012460	1	1.07218	3.01801e-12	6.66347e-08	0.386	0.304
bzw1a	ENSDARG00000010481	LL0000003869	1	0.640975	3.09264e-12	6.82823e-08	0.333	0.244
fam168b	ENSDARG00000101733	LL0000010015	1	0.548537	3.53378e-12	7.80224e-08	0.259	0.165
ywhaz	ENSDARG00000032575	LL0000038285	1	0.648165	5.54437e-12	1.22414e-07	0.42	0.359
med10	ENSDARG00000070623	LL0000018821	1	0.546159	1.15517e-11	2.55051e-07	0.333	0.252
ube2ib	ENSDARG00000007438	LL0000031481	1	0.568001	1.19729e-11	2.6435e-07	0.394	0.331
zgc:56304	ENSDARG00000074572	LL0000039169	1	0.575981	3.64344e-11	8.04435e-07	0.365	0.298
sec11a	ENSDARG00000008936	LL0000024365	1	0.599552	4.22907e-11	9.33736e-07	0.271	0.187
si:dkey-42i9.4	ENSDARG00000008049	LL0000027656	1	0.550776	4.41895e-11	9.75661e-07	0.432	0.373
cct3	ENSDARG00000016173	LL0000005211	1	0.549642	4.47605e-11	9.88266e-07	0.434	0.389
ube2v1	ENSDARG00000041875	LL0000031498	1	0.529857	4.71607e-11	1.04126e-06	0.412	0.358
rhoaa	ENSDARG00000026845	LL0000023646	1	0.531712	3.46461e-10	7.64951e-06	0.388	0.331
pomp	ENSDARG00000032296	LL0000022304	1	0.514369	3.5288e-10	7.79124e-06	0.414	0.365
psma8	ENSDARG00000010965	LL0000022740	1	0.528748	6.00111e-09	0.000132499	0.363	0.312
rnf2	ENSDARG00000010381	LL0000023800	1	0.553922	8.28892e-09	0.000183011	0.261	0.191
tmed7	ENSDARG00000046022	LL0000030434	1	0.527554	9.80107e-09	0.000216398	0.351	0.296
psmd3	ENSDARG00000018124	LL0000022771	1	0.511532	1.3012e-08	0.000287291	0.281	0.214
smndc1	ENSDARG00000056235	LL0000028997	1	0.528432	5.23496e-08	0.00115583	0.323	0.265
eif4ebp1	ENSDARG00000043608	LL0000009526	1	0.576081	5.50064e-08	0.00121449	0.39	0.367
cct2.1	ENSDARG00000104674	LL0000005210	1	0.520386	6.46891e-08	0.00142827	0.44	0.434
ppp2cb	ENSDARG00000099241	LL0000022459	1	0.507062	6.82235e-08	0.00150631	0.337	0.284
rab14	ENSDARG00000074246	LL0000023026	1	0.50806	2.58083e-07	0.00569821	0.257	0.195
krt17	ENSDARG00000094041	LL0000013459	2	4.23642	0	0	0.976	0.223
icn2	ENSDARG00000055514	LL0000012458	2	4.17727	0	0	1	0.191
cyt1	ENSDARG00000092947	LL0000008630	2	4.08598	0	0	0.998	0.513
cyt1l	ENSDARG00000036832	LL0000008631	2	4.02065	0	0	0.972	0.241
tcnbb	ENSDARG00000091996	LL0000030096	2	3.70485	0	0	0.959	0.071
si:ch211-195b11.3	ENSDARG00000100582	LL0000025387	2	3.45543	0	0	0.998	0.134
si:dkey-247k7.2	ENSDARG00000103199	LL0000027345	2	3.32621	0	0	0.994	0.042
zgc:111983	ENSDARG00000006588	LL0000038531	2	3.22405	0	0	0.981	0.046
si:ch211-207n23.2	ENSDARG00000097157	LL0000025509	2	3.21288	0	0	0.989	0.045
rhcga	ENSDARG00000003203	LL0000023639	2	3.15397	0	0	0.951	0.037
anxa1c	ENSDARG00000104359	LL0000001103	2	3.1378	0	0	0.991	0.05
zgc:193505	ENSDARG00000093584	LL0000039084	2	3.06305	0	0	0.994	0.06
si:dkeyp-1h4.6	ENSDARG00000093936	LL0000028143	2	3.04447	0	0	0.92	0.042
icn	ENSDARG00000009978	LL0000012457	2	2.81002	0	0	0.998	0.38
cldne	ENSDARG00000043128	LL0000005782	2	2.77016	0	0	0.996	0.027
cldnb	ENSDARG00000009544	LL0000005777	2	2.68175	0	0	1	0.093
mid1ip1a	ENSDARG00000041051	LL0000019022	2	2.63285	0	0	0.991	0.034
rhcgl1	ENSDARG00000007080	LL0000023641	2	2.60236	0	0	0.824	0.014
fut9d	ENSDARG00000028098	LL0000011005	2	2.46976	0	0	0.841	0.016
dhrs13a.2	ENSDARG00000111240	LL0000008886	2	2.3972	0	0	0.983	0.008
si:dkey-193p11.2	ENSDARG00000096712	LL0000026980	2	2.34415	0	0	0.553	0.024
foxq1a	ENSDARG00000030896	LL0000010627	2	2.3106	0	0	0.959	0.048
epcam	ENSDARG00000040534	LL0000009697	2	2.24692	0	0	1	0.141
epdl1	ENSDARG00000076386	LL0000009699	2	2.20358	0	0	0.963	0.056
krt5	ENSDARG00000058371	LL0000013465	2	2.20226	0	0	0.968	0.323
anxa1a	ENSDARG00000026726	LL0000001101	2	2.1961	0	0	0.991	0.221
fuca1.1	ENSDARG00000035890	LL0000010988	2	2.1366	0	0	0.963	0.069
agr1	ENSDARG00000060682	LL0000000476	2	2.13091	0	0	0.931	0.014
apodb	ENSDARG00000057437	LL0000001191	2	2.08806	0	0	0.987	0.02
spaca4l	ENSDARG00000116617	LL0000029222	2	2.07378	0	0	0.978	0.064
pnp5a	ENSDARG00000078619	LL0000022219	2	2.0561	0	0	0.974	0.161
scel	ENSDARG00000034677	LL0000024275	2	2.04429	0	0	0.951	0.016
tmem176l.4	ENSDARG00000074390	LL0000030521	2	2.02607	0	0	0.953	0.042
spint2	ENSDARG00000069476	LL0000029291	2	1.98682	0	0	0.983	0.048
cfl1l	ENSDARG00000012972	LL0000005533	2	1.98226	0	0	0.994	0.141
abcb5	ENSDARG00000021787	LL0000000038	2	1.96397	0	0	0.951	0.014
zgc:163030	ENSDARG00000069192	LL0000038869	2	1.95428	0	0	0.946	0.024
stard14	ENSDARG00000031929	LL0000029509	2	1.9349	0	0	0.976	0.02
si:ch211-157c3.4	ENSDARG00000087093	LL0000025200	2	1.9254	0	0	0.929	0.013
rhbg	ENSDARG00000009018	LL0000023638	2	1.9029	0	0	0.794	0.053
s100a10b	ENSDARG00000025254	LL0000024145	2	1.88977	0	0	0.996	0.198
cd9b	ENSDARG00000016691	LL0000005264	2	1.82605	0	0	0.972	0.054
pycard	ENSDARG00000040076	LL0000022969	2	1.81941	0	0	0.966	0.104
soul2	ENSDARG00000039499	LL0000029168	2	1.80789	0	0	0.94	0.013
si:ch211-105c13.3	ENSDARG00000089441	LL0000024885	2	1.75344	0	0	0.963	0.104
si:dkey-7c18.24	ENSDARG00000041433	LL0000027913	2	1.72661	0	0	0.29	0.009
sec23b	ENSDARG00000019360	LL0000024377	2	1.70426	0	0	0.963	0.048
hrc	ENSDARG00000045947		2	1.65822	0	0	0.948	0.028
s100w	ENSDARG00000101181	LL0000024153	2	1.62875	0	0	0.918	0.025
stx11b.1	ENSDARG00000029290	LL0000029608	2	1.62629	0	0	0.918	0.011
si:dkey-87o1.2	ENSDARG00000095796	LL0000027990	2	1.60478	0	0	0.948	0.019
si:ch73-329n5.6	ENSDARG00000098256	LL0000026455	2	1.58991	0	0	0.654	0.008
si:ch211-217k17.9	ENSDARG00000093494	LL0000025609	2	1.56977	0	0	0.88	0.01
si:ch211-125o16.4	ENSDARG00000056836	LL0000025009	2	1.54672	0	0	0.903	0.006
mgst1.2	ENSDARG00000022165	LL0000018975	2	1.53892	0	0	0.989	0.223
krt96	ENSDARG00000095147	LL0000013472	2	1.53234	0	0	0.529	0.01
zgc:153284	ENSDARG00000036876	LL0000038720	2	1.51826	0	0	0.927	0.031
mhc1zba	ENSDARG00000036588	LL0000018991	2	1.47657	0	0	0.959	0.138
selenow2b	ENSDARG00000089936	LL0000024417	2	1.46922	0	0	0.91	0.019
ckap4	ENSDARG00000032405	LL0000005723	2	1.46199	0	0	0.92	0.057
si:dkeyp-51b9.3	ENSDARG00000092379	LL0000028203	2	1.43482	0	0	0.884	0.007
zgc:153911	ENSDARG00000002509	LL0000038755	2	1.43451	0	0	0.766	0.022
s100v1	ENSDARG00000070427	LL0000024151	2	1.42567	0	0	0.899	0.025
xkr8.2	ENSDARG00000076820	LL0000032201	2	1.41894	0	0	0.83	0.014
CU914622.2	ENSDARG00000103634	LL0000008303	2	1.39653	0	0	0.617	0.006
cldn23a	ENSDARG00000028096	LL0000005768	2	1.39452	0	0	0.841	0.007
ppl	ENSDARG00000101043	LL0000022390	2	1.38829	0	0	0.834	0.019
si:dkey-222n6.2	ENSDARG00000034836	LL0000027184	2	1.38525	0	0	0.908	0.006
si:ch73-204p21.2	ENSDARG00000097902	LL0000026300	2	1.33197	0	0	0.832	0.01
si:dkey-184p9.7	ENSDARG00000092726	LL0000026930	2	1.32084	0	0	0.828	0.022
zgc:110333	ENSDARG00000040628	LL0000038511	2	1.28609	0	0	0.89	0.007
zgc:92242	ENSDARG00000029443	LL0000039276	2	1.27121	0	0	0.916	0.104
anxa2a	ENSDARG00000003216	LL0000001104	2	1.26288	0	0	0.94	0.11
elovl7a	ENSDARG00000069279	LL0000009589	2	1.23491	0	0	0.867	0.01
prr13	ENSDARG00000086216	LL0000022680	2	1.23414	0	0	0.942	0.072
ponzr3	ENSDARG00000088589	LL0000022313	2	1.22909	0	0	0.351	0.004
perp	ENSDARG00000063572	LL0000021603	2	1.20731	0	0	0.91	0.155
nqo1	ENSDARG00000010250	LL0000020564	2	1.17445	0	0	0.882	0.043
zgc:175088	ENSDARG00000099306	LL0000039073	2	1.17342	0	0	0.884	0.119
si:dkey-239b22.1	ENSDARG00000031588	LL0000027276	2	1.16433	0	0	0.735	0.004
eevs	ENSDARG00000087873	LL0000009412	2	1.15278	0	0	0.744	0.026
cldn7b	ENSDARG00000014047	LL0000005774	2	1.1483	0	0	0.841	0.033
caspb	ENSDARG00000052039	LL0000004940	2	1.14665	0	0	0.809	0.023
si:dkey-33i11.9	ENSDARG00000102555	LL0000027605	2	1.11361	0	0	0.869	0.038
cast	ENSDARG00000058693	LL0000004947	2	1.09316	0	0	0.916	0.103
si:rp71-77l1.1	ENSDARG00000097746	LL0000028358	2	1.07709	0	0	0.699	0.021
arhgdig	ENSDARG00000004034	LL0000001299	2	1.0709	0	0	0.927	0.106
si:dkeyp-86h10.3	ENSDARG00000095615	LL0000028299	2	1.06417	0	0	0.675	0.006
ctss2.2	ENSDARG00000013771	LL0000007769	2	1.05958	0	0	0.867	0.026
vamp8	ENSDARG00000024116	LL0000031794	2	1.05012	0	0	0.847	0.034
CABZ01051602.1	ENSDARG00000103973	LL0000004174	2	1.04389	0	0	0.604	0.008
si:ch211-79k12.1	ENSDARG00000079175	LL0000026147	2	1.02621	0	0	0.834	0.012
plekhf1	ENSDARG00000102435	LL0000022111	2	1.02614	0	0	0.617	0.01
si:dkey-202l22.6	ENSDARG00000102364	LL0000027056	2	1.00762	0	0	0.555	0.004
bicdl2l	ENSDARG00000091669	LL0000001902	2	1.00368	0	0	0.725	0.009
si:ch211-212k18.7	ENSDARG00000055504	LL0000025550	2	1.00268	0	0	0.806	0.064
tmem45b	ENSDARG00000056239	LL0000030622	2	0.98983	0	0	0.811	0.012
phlda2	ENSDARG00000042874	LL0000021722	2	0.987848	0	0	0.817	0.099
zgc:100868	ENSDARG00000004748	LL0000038439	2	0.986271	0	0	0.671	0.006
hsd17b12a	ENSDARG00000015709	LL0000012345	2	0.986133	0	0	0.789	0.029
znf185	ENSDARG00000103917	LL0000039566	2	0.980928	0	0	0.761	0.01
zyg11	ENSDARG00000007737	LL0000039746	2	0.976752	0	0	0.817	0.05
aep1	ENSDARG00000039099	LL0000000431	2	0.94733	0	0	0.333	0.014
pkp3a	ENSDARG00000051861	LL0000022041	2	0.939601	0	0	0.794	0.032
tcima	ENSDARG00000079497	LL0000030091	2	0.938422	0	0	0.669	0.085
si:dkey-204f11.64	ENSDARG00000094695	LL0000027066	2	0.934115	0	0	0.882	0.07
si:ch211-166a6.5	ENSDARG00000079745	LL0000025272	2	0.926731	0	0	0.847	0.085
fbp1a	ENSDARG00000021366	LL0000010173	2	0.921727	0	0	0.914	0.171
elf3	ENSDARG00000077982	LL0000009557	2	0.921186	0	0	0.566	0.018
capn2l	ENSDARG00000034211	LL0000004882	2	0.919378	0	0	0.748	0.016
BX548046.2	ENSDARG00000096270	LL0000003099	2	0.918977	0	0	0.789	0.012
f11r.1	ENSDARG00000017320	LL0000009905	2	0.915834	0	0	0.862	0.069
dusp5	ENSDARG00000019307	LL0000009290	2	0.896884	0	0	0.665	0.062
si:dkey-19b23.12	ENSDARG00000100712	LL0000027013	2	0.894847	0	0	0.533	0.014
si:ch73-347e22.8	ENSDARG00000103322	LL0000026484	2	0.892232	0	0	0.697	0.008
evplb	ENSDARG00000103459	LL0000009854	2	0.883188	0	0	0.51	0.006
si:dkey-221j11.3	ENSDARG00000093304	LL0000027164	2	0.877933	0	0	0.699	0.002
klf3	ENSDARG00000015495	LL0000013363	2	0.877299	0	0	0.759	0.088
evpla	ENSDARG00000019808	LL0000009853	2	0.869826	0	0	0.71	0.005
zgc:154054	ENSDARG00000099923	LL0000038767	2	0.864404	0	0	0.738	0.01
egr2a	ENSDARG00000044098	LL0000009457	2	0.86358	0	0	0.641	0.041
slc14a2	ENSDARG00000051914	LL0000028496	2	0.861868	0	0	0.613	0.004
abca12	ENSDARG00000074749	LL0000000026	2	0.86001	0	0	0.669	0.007
ptgs2b	ENSDARG00000010276	LL0000022841	2	0.85857	0	0	0.505	0.015
cmah	ENSDARG00000057714	LL0000005849	2	0.857643	0	0	0.688	0.01
oclna	ENSDARG00000005108	LL0000020808	2	0.856778	0	0	0.757	0.03
jupa	ENSDARG00000070787	LL0000013049	2	0.855986	0	0	0.873	0.112
capn9	ENSDARG00000012341	LL0000004889	2	0.855428	0	0	0.699	0.004
cx30.3	ENSDARG00000042707	LL0000008460	2	0.852637	0	0	0.714	0.007
si:dkey-262k9.2	ENSDARG00000098024	LL0000027422	2	0.850112	0	0	0.74	0.045
adgrf6	ENSDARG00000091757	LL0000000354	2	0.842975	0	0	0.628	0.006
oclnb	ENSDARG00000003091	LL0000020809	2	0.838209	0	0	0.682	0.006
slc20a1b	ENSDARG00000010641	LL0000028552	2	0.831769	0	0	0.845	0.123
si:cabz01007794.1	ENSDARG00000105590	LL0000024715	2	0.818132	0	0	0.514	0.004
gbgt1l4	ENSDARG00000068503	LL0000011190	2	0.810898	0	0	0.66	0.008
ANXA1 (1 of many)	ENSDARG00000098481	LL0000001096	2	0.803921	0	0	0.647	0.003
tlcd1	ENSDARG00000002391	LL0000030353	2	0.787169	0	0	0.727	0.016
zgc:92313	ENSDARG00000040513	LL0000039279	2	0.786816	0	0	0.748	0.027
spint1a	ENSDARG00000102332	LL0000029289	2	0.786004	0	0	0.763	0.053
sh3d21	ENSDARG00000099448	LL0000024636	2	0.779856	0	0	0.699	0.038
ildr1a	ENSDARG00000103929	LL0000012690	2	0.771788	0	0	0.68	0.012
si:ch211-98n17.5	ENSDARG00000105641	LL0000026174	2	0.769404	0	0	0.69	0.017
chmp4bb	ENSDARG00000007323	LL0000005609	2	0.762924	0	0	0.837	0.136
zgc:174938	ENSDARG00000075622	LL0000039069	2	0.762245	0	0	0.561	0.003
FO681323.1	ENSDARG00000117485	LL0000010465	2	0.751989	0	0	0.585	0.004
cyldb	ENSDARG00000089724	LL0000008538	2	0.748756	0	0	0.63	0.003
pof1b	ENSDARG00000054060	LL0000022240	2	0.748155	0	0	0.684	0.026
tmem176l.3b	ENSDARG00000096874	LL0000030520	2	0.7385	0	0	0.645	0.004
si:ch73-31d8.2	ENSDARG00000097239	LL0000026450	2	0.736053	0	0	0.602	0.007
chmp2bb	ENSDARG00000002190	LL0000005606	2	0.72607	0	0	0.869	0.14
si:dkeyp-11e3.1	ENSDARG00000102058	LL0000028117	2	0.724137	0	0	0.639	0.003
myzap	ENSDARG00000075017	LL0000019924	2	0.721333	0	0	0.63	0.017
gcnt4a	ENSDARG00000035198	LL0000011221	2	0.721178	0	0	0.677	0.032
eps8l1a	ENSDARG00000057984	LL0000009740	2	0.719896	0	0	0.673	0.008
tnks1bp1	ENSDARG00000068760	LL0000030752	2	0.71955	0	0	0.609	0.021
naga	ENSDARG00000099313	LL0000019961	2	0.713763	0	0	0.673	0.047
cdh1	ENSDARG00000102750	LL0000005314	2	0.713746	0	0	0.622	0.042
ndufaf2	ENSDARG00000069286	LL0000020127	2	0.708026	0	0	0.677	0.064
mgll	ENSDARG00000036820	LL0000018968	2	0.701829	0	0	0.673	0.031
tmem238a	ENSDARG00000093684	LL0000030576	2	0.699175	0	0	0.723	0.049
cyb5r2	ENSDARG00000051925	LL0000008522	2	0.692009	0	0	0.643	0.016
si:ch1073-443f11.2	ENSDARG00000105068	LL0000024857	2	0.688774	0	0	0.68	0.021
ankrd22	ENSDARG00000002298	LL0000001027	2	0.68396	0	0	0.624	0.027
si:dkey-38p12.3	ENSDARG00000061844	LL0000027626	2	0.677246	0	0	0.686	0.027
BX901957.1	ENSDARG00000098363	LL0000003589	2	0.675346	0	0	0.615	0.002
il17rc	ENSDARG00000099902	LL0000012661	2	0.673736	0	0	0.63	0.004
sft2d2a	ENSDARG00000070746	LL0000024571	2	0.661637	0	0	0.613	0.002
cavin2a	ENSDARG00000027611	LL0000004958	2	0.659561	0	0	0.712	0.043
gpa33a	ENSDARG00000100223	LL0000011530	2	0.650148	0	0	0.686	0.033
zgc:100829	ENSDARG00000015557	LL0000038436	2	0.641422	0	0	0.686	0.062
galnt7	ENSDARG00000057303	LL0000011121	2	0.639504	0	0	0.684	0.038
foxq1b	ENSDARG00000055395	LL0000010628	2	0.638853	0	0	0.469	0.01
gmds	ENSDARG00000026629	LL0000011418	2	0.637728	0	0	0.626	0.05
tspan37	ENSDARG00000095090	LL0000031253	2	0.635616	0	0	0.634	0.027
tmem54a	ENSDARG00000059247	LL0000030629	2	0.628636	0	0	0.615	0.018
prkcdb	ENSDARG00000070651	LL0000022590	2	0.627546	0	0	0.615	0.025
ms4a17a.10.1	ENSDARG00000093546		2	0.626922	0	0	0.54	0.007
psme1	ENSDARG00000002165	LL0000022780	2	0.625303	0	0	0.63	0.029
fam129aa	ENSDARG00000042055	LL0000009979	2	0.625086	0	0	0.589	0.003
tmem30b	ENSDARG00000054122	LL0000030606	2	0.623975	0	0	0.613	0.014
itm2bb	ENSDARG00000041505	LL0000012963	2	0.622453	0	0	0.742	0.085
hsd11b1la	ENSDARG00000071377	LL0000012340	2	0.618324	0	0	0.613	0.017
ezrb	ENSDARG00000025091	LL0000009903	2	0.618026	0	0	0.705	0.062
abracl	ENSDARG00000042876	LL0000000119	2	0.617122	0	0	0.738	0.096
zgc:172075	ENSDARG00000076146	LL0000038966	2	0.603078	0	0	0.576	0.002
fut9b	ENSDARG00000067524	LL0000011004	2	0.599584	0	0	0.606	0.006
prrg2	ENSDARG00000087193	LL0000022694	2	0.595604	0	0	0.615	0.022
lpcat4	ENSDARG00000035028	LL0000018296	2	0.594835	0	0	0.553	0.007
fuca2	ENSDARG00000044073	LL0000010990	2	0.594061	0	0	0.718	0.077
anxa3a	ENSDARG00000009196	LL0000001106	2	0.593455	0	0	0.578	0.008
elovl1a	ENSDARG00000099960	LL0000009581	2	0.592699	0	0	0.51	0.017
eppk1	ENSDARG00000096359	LL0000009734	2	0.591217	0	0	0.508	0.02
elovl6l	ENSDARG00000038639	LL0000009588	2	0.589566	0	0	0.525	0.003
lmo7a	ENSDARG00000004930	LL0000013739	2	0.581023	0	0	0.6	0.033
hebp2	ENSDARG00000042630	LL0000012019	2	0.578177	0	0	0.598	0.049
si:dkey-16l2.20	ENSDARG00000098191	LL0000026850	2	0.574223	0	0	0.647	0.061
gna14	ENSDARG00000035178	LL0000011437	2	0.570232	0	0	0.512	0.003
rnf183	ENSDARG00000068851	LL0000023796	2	0.569584	0	0	0.561	0.005
styk1b	ENSDARG00000041947	LL0000029638	2	0.569098	0	0	0.589	0.006
cyp27a7	ENSDARG00000033802	LL0000008560	2	0.566058	0	0	0.641	0.035
enosf1	ENSDARG00000038359	LL0000009653	2	0.560909	0	0	0.585	0.047
ch25hl1.1	ENSDARG00000039381	LL0000005547	2	0.560831	0	0	0.501	0.004
dsc2l	ENSDARG00000039677	LL0000009232	2	0.558651	0	0	0.557	0.018
cav1	ENSDARG00000103747	LL0000004953	2	0.550319	0	0	0.63	0.062
anxa1b	ENSDARG00000100095	LL0000001102	2	0.549202	0	0	0.43	0.004
esrp1	ENSDARG00000011245	LL0000009811	2	0.549058	0	0	0.563	0.012
wu:fb18f06	ENSDARG00000097635	LL0000032127	2	0.546533	0	0	0.542	0.016
mapre1a	ENSDARG00000042927	LL0000018655	2	0.544738	0	0	0.675	0.066
ca15c	ENSDARG00000002259	LL0000003945	2	0.538447	0	0	0.327	0.001
TSTD1	ENSDARG00000071567	LL0000031277	2	0.535384	0	0	0.576	0.044
gsnb	ENSDARG00000045262	LL0000011802	2	0.535042	0	0	0.535	0.015
psme2	ENSDARG00000033144	LL0000022781	2	0.53118	0	0	0.574	0.024
si:ch73-78o10.1	ENSDARG00000089511	LL0000026580	2	0.529655	0	0	0.527	0.002
dbnla	ENSDARG00000008170	LL0000008691	2	0.528461	0	0	0.538	0.003
zgc:174935	ENSDARG00000079255	LL0000039068	2	0.527922	0	0	0.561	0.006
bik	ENSDARG00000045549	LL0000001906	2	0.523631	0	0	0.535	0.019
cryl1	ENSDARG00000003675	LL0000007413	2	0.518536	0	0	0.563	0.041
egr3	ENSDARG00000089156	LL0000009459	2	0.516987	0	0	0.458	0.02
epas1a	ENSDARG00000008697	LL0000009684	2	0.514219	0	0	0.561	0.042
gm2a	ENSDARG00000088439	LL0000011416	2	0.511942	0	0	0.652	0.071
sp8a	ENSDARG00000011870	LL0000029218	2	0.508963	0	0	0.351	0.011
zgc:194007	ENSDARG00000091860	LL0000039096	2	0.503195	0	0	0.462	0.002
slc16a12b	ENSDARG00000089885	LL0000028504	2	0.513074	1.49613e-304	3.30332e-300	0.495	0.045
pmaip1	ENSDARG00000089307	LL0000022192	2	1.12274	7.42308e-302	1.63894e-297	0.806	0.139
krt4	ENSDARG00000017624	LL0000013464	2	3.9068	2.76308e-300	6.1006e-296	1	0.632
midn	ENSDARG00000018524	LL0000019026	2	1.16754	2.74e-299	6.04965e-295	0.946	0.22
sqstm1	ENSDARG00000075014	LL0000029351	2	0.570846	9.60929e-295	2.12163e-290	0.774	0.118
selenow1	ENSDARG00000035136	LL0000024415	2	1.73412	7.10337e-284	1.56835e-279	1	0.512
klhl24b	ENSDARG00000008275	LL0000013398	2	0.542532	8.19309e-283	1.80895e-278	0.561	0.064
selenot2	ENSDARG00000023220	LL0000024412	2	0.788986	9.72675e-283	2.14757e-278	0.849	0.16
xiap	ENSDARG00000016143	LL0000032189	2	0.58773	1.10014e-281	2.429e-277	0.751	0.118
ptgs2a	ENSDARG00000004539	LL0000022840	2	0.665284	7.35093e-279	1.62301e-274	0.538	0.059
klf2b	ENSDARG00000040432	LL0000013362	2	0.612426	3.00311e-276	6.63058e-272	0.609	0.077
btbd10b	ENSDARG00000020252	LL0000002043	2	0.637528	1.05379e-268	2.32666e-264	0.817	0.149
s100v2	ENSDARG00000070702	LL0000024152	2	0.885631	1.63006e-268	3.59902e-264	0.933	0.206
net1	ENSDARG00000032765	LL0000020208	2	0.756283	9.08794e-258	2.00653e-253	0.856	0.173
chmp1b	ENSDARG00000099624	LL0000005603	2	0.748212	1.09718e-254	2.42245e-250	0.897	0.196
rasgef1ba	ENSDARG00000033614	LL0000023220	2	0.590317	1.11974e-248	2.47228e-244	0.88	0.182
ubb	ENSDARG00000093313	LL0000031460	2	1.38573	2.73774e-246	6.04465e-242	0.972	0.335
nr4a1	ENSDARG00000000796	LL0000020590	2	0.701647	5.25482e-246	1.16021e-241	0.8	0.151
capns1a	ENSDARG00000035329	LL0000004890	2	0.952211	1.69107e-242	3.73371e-238	0.927	0.247
arl5c	ENSDARG00000035719	LL0000001365	2	0.637298	9.52907e-242	2.10392e-237	0.701	0.118
tmem59	ENSDARG00000019033	LL0000030633	2	0.70887	4.70466e-240	1.03874e-235	0.888	0.201
krtt1c19e	ENSDARG00000090268	LL0000013477	2	1.50943	2.37654e-238	5.24716e-234	0.884	0.261
reep3b	ENSDARG00000004160	LL0000023384	2	0.57757	3.08716e-237	6.81614e-233	0.735	0.133
ppil1	ENSDARG00000015422	LL0000022382	2	0.518774	4.79722e-237	1.05918e-232	0.615	0.093
lgmn	ENSDARG00000039150	LL0000013634	2	0.663715	2.08848e-229	4.61115e-225	0.718	0.131
si:dkey-248g15.3	ENSDARG00000097959	LL0000027349	2	1.37157	9.76271e-229	2.15551e-224	0.415	0.044
pleca	ENSDARG00000062590	LL0000022096	2	0.600045	1.15709e-221	2.55474e-217	0.742	0.14
chmp5b	ENSDARG00000103718	LL0000005612	2	0.60534	1.87072e-215	4.13035e-211	0.849	0.191
chac1	ENSDARG00000070426	LL0000005551	2	1.27463	9.65172e-212	2.131e-207	1	0.592
si:ch211-286b5.5	ENSDARG00000096661	LL0000026022	2	0.688357	6.4596e-207	1.42621e-202	0.892	0.233
vps4b	ENSDARG00000069175	LL0000031900	2	0.531379	1.13872e-202	2.51417e-198	0.787	0.17
si:dkey-112e7.2	ENSDARG00000099281	LL0000026656	2	0.677937	3.02781e-200	6.68511e-196	0.899	0.243
tmsb1	ENSDARG00000104181	LL0000030689	2	1.28988	6.68434e-189	1.47584e-184	0.927	0.326
fosb	ENSDARG00000055751	LL0000010567	2	0.710267	3.33794e-184	7.36984e-180	0.742	0.167
mcl1a	ENSDARG00000009779	LL0000018766	2	1.04358	7.96287e-184	1.75812e-179	0.998	0.626
ahnak	ENSDARG00000061764	LL0000000495	2	0.52102	1.97333e-182	4.35691e-178	0.796	0.181
glrx	ENSDARG00000028106	LL0000011394	2	0.557073	1.70516e-177	3.76481e-173	0.841	0.22
zfand5a	ENSDARG00000018898	LL0000038410	2	0.639411	1.01381e-175	2.23838e-171	0.843	0.222
jdp2b	ENSDARG00000020133	LL0000013025	2	1.02218	2.92728e-175	6.46314e-171	0.955	0.371
ccng2	ENSDARG00000017602	LL0000005175	2	0.7225	2.19134e-174	4.83825e-170	0.888	0.258
cst14a.2	ENSDARG00000045352	LL0000007467	2	0.915677	6.71715e-174	1.48308e-169	0.963	0.377
capns1b	ENSDARG00000013804	LL0000004891	2	0.66396	4.37981e-173	9.67019e-169	0.886	0.251
cox17	ENSDARG00000069920	LL0000006098	2	0.817073	4.11166e-172	9.07814e-168	0.981	0.404
b2ml	ENSDARG00000015887	LL0000001711	2	0.694142	5.33671e-172	1.17829e-167	0.933	0.296
lgals3b	ENSDARG00000044001	LL0000013618	2	0.574413	1.46092e-170	3.22556e-166	0.839	0.22
hmgb3b	ENSDARG00000006408	LL0000012173	2	0.601186	1.64657e-170	3.63546e-166	0.871	0.25
si:ch73-335l21.4	ENSDARG00000091234	LL0000026464	2	0.81539	1.79197e-169	3.95648e-165	0.841	0.249
prelid3b	ENSDARG00000009505	LL0000022542	2	0.849632	1.64476e-168	3.63148e-164	0.961	0.386
rplp2	ENSDARG00000101406	LL0000023942	2	0.530682	5.96839e-163	1.31776e-158	1	0.964
smdt1b	ENSDARG00000098852	LL0000028973	2	0.609971	2.62476e-160	5.79521e-156	0.914	0.293
glo1	ENSDARG00000068978	LL0000011384	2	0.698637	1.65025e-158	3.64359e-154	0.923	0.337
fxyd6l	ENSDARG00000097057	LL0000011012	2	0.792635	1.26103e-157	2.78423e-153	0.978	0.432
nfe2l2a	ENSDARG00000042824	LL0000020251	2	0.518116	7.3859e-157	1.63073e-152	0.858	0.238
slc38a5b	ENSDARG00000014587	LL0000028740	2	0.683871	1.29134e-153	2.85115e-149	0.938	0.323
mpc1	ENSDARG00000093448	LL0000019471	2	0.551422	4.47157e-151	9.87278e-147	0.899	0.288
hdlbpa	ENSDARG00000009830	LL0000012006	2	0.612018	9.31566e-138	2.05681e-133	0.908	0.32
aldob	ENSDARG00000053684	LL0000000884	2	0.518244	1.17588e-137	2.59623e-133	0.991	0.543
cebpb	ENSDARG00000042725	LL0000005407	2	0.613201	9.37394e-137	2.06967e-132	0.929	0.33
gnb1a	ENSDARG00000090454	LL0000011457	2	0.503474	2.05086e-136	4.5281e-132	0.944	0.372
atox1	ENSDARG00000087693	LL0000001565	2	0.55073	3.59007e-136	7.92651e-132	0.873	0.292
ctsla	ENSDARG00000007836	LL0000007763	2	0.831788	8.39519e-135	1.85357e-130	0.987	0.51
tdh	ENSDARG00000002745	LL0000030109	2	0.686731	1.23467e-132	2.72604e-128	0.966	0.401
prdx5	ENSDARG00000055064	LL0000022536	2	0.553327	2.53008e-130	5.58617e-126	0.88	0.3
ywhabl	ENSDARG00000040287	LL0000038277	2	0.663268	1.38897e-120	3.0667e-116	0.968	0.498
hspa8	ENSDARG00000068992	LL0000012381	2	0.519311	2.8488e-120	6.28988e-116	1	0.939
tob1b	ENSDARG00000021372	LL0000030801	2	0.715049	5.30153e-119	1.17052e-114	0.963	0.502
btg2	ENSDARG00000020298	LL0000002063	2	0.684356	1.13372e-114	2.50314e-110	0.998	0.565
egr1	ENSDARG00000037421	LL0000009456	2	0.519809	3.86006e-112	8.52263e-108	0.882	0.306
krt97	ENSDARG00000000212	LL0000013473	2	2.98066	1.53839e-108	3.39661e-104	0.417	0.096
ier2b	ENSDARG00000086881	LL0000012475	2	0.634771	1.79456e-104	3.96221e-100	0.981	0.439
krt91	ENSDARG00000036830	LL0000013467	2	1.41443	3.10124e-52	6.84724e-48	0.806	0.47
krt15	ENSDARG00000036840	LL0000013458	2	0.922731	1.23651e-18	2.73009e-14	0.29	0.137
rs1a	ENSDARG00000027236	LL0000024045	3	3.60578	0	0	0.712	0.076
vsx1	ENSDARG00000056292	LL0000031927	3	3.37692	0	0	0.694	0.041
gnao1b	ENSDARG00000036058	LL0000011450	3	3.12745	0	0	0.548	0.053
cabp5b	ENSDARG00000028485	LL0000003972	3	3.00923	0	0	0.463	0.024
syt5b	ENSDARG00000011640	LL0000029792	3	2.97668	0	0	0.836	0.067
gnb3a	ENSDARG00000004358	LL0000011461	3	2.96595	0	0	0.602	0.03
calb2b	ENSDARG00000036344	LL0000004799	3	2.90938	0	0	0.6	0.033
nrn1lb	ENSDARG00000061149	LL0000020629	3	2.68895	0	0	0.548	0.021
vamp1	ENSDARG00000031283	LL0000031789	3	2.58536	0	0	0.618	0.033
gng13b	ENSDARG00000037921	LL0000011471	3	2.56352	0	0	0.515	0.052
rgs16	ENSDARG00000040177	LL0000023606	3	2.55509	0	0	0.53	0.032
snap25b	ENSDARG00000058117	LL0000029041	3	2.5379	0	0	0.773	0.129
cabp2a	ENSDARG00000052016	LL0000003967	3	2.48308	0	0	0.485	0.02
bhlhe23	ENSDARG00000037588	LL0000001890	3	2.43944	0	0	0.452	0.027
foxg1b	ENSDARG00000032705	LL0000010590	3	2.42342	0	0	0.735	0.102
si:ch73-256g18.2	ENSDARG00000105527	LL0000026368	3	2.3322	0	0	0.452	0.017
crx	ENSDARG00000011989	LL0000007347	3	2.28921	0	0	0.609	0.054
neurod4	ENSDARG00000003469	LL0000020226	3	2.27784	0	0	0.589	0.057
lin7a	ENSDARG00000013414	LL0000013688	3	2.21225	0	0	0.512	0.053
gabrb3	ENSDARG00000023771	LL0000011070	3	1.78663	0	0	0.335	0.016
sv2bb	ENSDARG00000060711	LL0000029707	3	1.76223	0	0	0.384	0.023
lactbl1b	ENSDARG00000070467	LL0000013502	3	1.51741	1.62934e-293	3.59742e-289	0.261	0.009
igsf21b	ENSDARG00000056084	LL0000012617	3	1.42709	4.45777e-283	9.84232e-279	0.252	0.009
ppp1r1b	ENSDARG00000076280	LL0000022430	3	1.84033	1.22257e-273	2.69931e-269	0.38	0.029
golga7ba	ENSDARG00000036295	LL0000011506	3	1.94392	5.70769e-268	1.2602e-263	0.503	0.061
atp1b2a	ENSDARG00000099203	LL0000001586	3	2.14005	5.92665e-267	1.30855e-262	0.584	0.09
otx5	ENSDARG00000043483	LL0000021140	3	1.76161	8.7562e-254	1.93328e-249	0.416	0.04
samsn1a	ENSDARG00000054543	LL0000024193	3	1.66917	3.44043e-235	7.59613e-231	0.366	0.033
efna1b	ENSDARG00000018787	LL0000009430	3	2.52382	1.74051e-229	3.84286e-225	0.56	0.097
BX663503.1	ENSDARG00000092142	LL0000003410	3	1.53063	7.67316e-227	1.69416e-222	0.263	0.015
epb41a	ENSDARG00000099283	LL0000009686	3	1.98095	3.99762e-223	8.82634e-219	0.627	0.132
pcp4l1	ENSDARG00000023181	LL0000021453	3	1.54177	1.89693e-221	4.18824e-217	0.297	0.021
sypb	ENSDARG00000002230	LL0000029770	3	1.70489	9.11583e-193	2.01268e-188	0.434	0.061
eml1	ENSDARG00000042840	LL0000009618	3	1.75911	1.35823e-188	2.99884e-184	0.411	0.058
ckbb	ENSDARG00000043257	LL0000005726	3	1.84016	3.05928e-184	6.75459e-180	0.906	0.495
anp32e	ENSDARG00000054804	LL0000001086	3	2.09264	3.53288e-181	7.80025e-177	0.807	0.363
ptmab	ENSDARG00000101766	LL0000022860	3	1.33394	1.08615e-176	2.3981e-172	0.993	0.858
cplx4a	ENSDARG00000059978	LL0000006147	3	1.52409	3.58472e-176	7.91469e-172	0.276	0.024
sh3bgrl2	ENSDARG00000036878	LL0000024625	3	1.88133	3.31677e-175	7.32309e-171	0.373	0.05
si:ch73-1a9.3	ENSDARG00000103919	LL0000026297	3	1.46398	3.85393e-171	8.5091e-167	0.973	0.861
sh3gl2a	ENSDARG00000023600	LL0000024639	3	1.82463	8.25167e-171	1.82189e-166	0.387	0.056
stx3a	ENSDARG00000001880	LL0000029620	3	1.59383	3.28178e-168	7.24584e-164	0.312	0.035
nme2a	ENSDARG00000043820	LL0000020415	3	2.36277	5.53241e-165	1.2215e-160	0.382	0.056
chn1	ENSDARG00000101735	LL0000005616	3	1.55848	6.81742e-164	1.50522e-159	0.366	0.051
atp6v0cb	ENSDARG00000036577	LL0000001634	3	1.74428	3.09589e-159	6.83542e-155	0.596	0.159
histh1l	ENSDARG00000035519	LL0000012141	3	1.66943	1.01258e-153	2.23568e-149	0.919	0.639
atpv0e2	ENSDARG00000059057	LL0000001665	3	1.72514	2.23099e-138	4.9258e-134	0.569	0.165
nell2b	ENSDARG00000062797	LL0000020200	3	1.53161	2.04817e-137	4.52214e-133	0.292	0.037
h3f3c	ENSDARG00000033009	LL0000011907	3	1.22133	2.39454e-133	5.28691e-129	0.906	0.77
six3b	ENSDARG00000054879	LL0000028441	3	2.19981	1.63355e-119	3.60672e-115	0.265	0.036
isl1	ENSDARG00000004023	LL0000012899	3	1.60691	1.96828e-119	4.34576e-115	0.281	0.04
zgc:162707	ENSDARG00000061664	LL0000038846	3	1.39741	7.76011e-117	1.71335e-112	0.261	0.035
nsg2	ENSDARG00000102975	LL0000020653	3	2.0634	1.22257e-110	2.69932e-106	0.425	0.103
fstl5	ENSDARG00000040198	LL0000010899	3	1.17445	7.404e-107	1.63473e-102	0.252	0.035
hmgn6	ENSDARG00000087636	LL0000012181	3	1.13725	4.17854e-104	9.22581e-100	0.863	0.702
gpm6aa	ENSDARG00000055455	LL0000011571	3	1.40554	2.84564e-102	6.28288e-98	0.613	0.233
map4l	ENSDARG00000068745	LL0000018618	3	1.37718	2.09384e-99	4.623e-95	0.276	0.047
gapdhs	ENSDARG00000039914	LL0000011139	3	1.67611	9.55919e-99	2.11057e-94	0.782	0.579
ptmaa	ENSDARG00000021113	LL0000022859	3	0.912697	8.76133e-97	1.93441e-92	0.917	0.764
itm2cb	ENSDARG00000039650	LL0000012965	3	1.66317	2.46232e-95	5.43655e-91	0.29	0.054
atp1a3a	ENSDARG00000018259	LL0000001582	3	1.32886	4.38111e-91	9.67304e-87	0.297	0.058
efna1a	ENSDARG00000030326	LL0000009429	3	1.62524	2.63422e-90	5.8161e-86	0.315	0.069
laptm4b	ENSDARG00000035870	LL0000013530	3	1.55737	3.23214e-88	7.13625e-84	0.391	0.107
hmgn7	ENSDARG00000062326	LL0000012182	3	1.17402	2.29265e-85	5.06193e-81	0.818	0.727
fam107b	ENSDARG00000026865	LL0000009960	3	2.07395	2.47935e-84	5.47416e-80	0.553	0.251
rnasekb	ENSDARG00000104458	LL0000023741	3	1.34199	7.6674e-83	1.69289e-78	0.535	0.214
aldocb	ENSDARG00000019702	LL0000000886	3	1.65617	1.30333e-81	2.87763e-77	0.517	0.208
h1f0	ENSDARG00000038559	LL0000011896	3	1.34761	2.21877e-79	4.89882e-75	0.721	0.472
ndrg4	ENSDARG00000103937	LL0000020103	3	1.34864	1.56161e-77	3.44787e-73	0.283	0.062
mt-atp6	ENSDARG00000063911	LL0000001622	3	0.589627	2.34743e-75	5.18289e-71	0.98	0.958
eno1a	ENSDARG00000022456	LL0000009647	3	1.96236	7.23244e-69	1.59685e-64	0.553	0.298
h2afx1	ENSDARG00000068995	LL0000011903	3	1.2284	1.81144e-66	3.99948e-62	0.73	0.58
bcl2l13	ENSDARG00000062370	LL0000001845	3	1.34209	1.29355e-65	2.85603e-61	0.281	0.071
prss59.2	ENSDARG00000073742	LL0000022709	3	0.503701	2.7492e-65	6.06997e-61	0.867	0.896
mdkb	ENSDARG00000020708	LL0000018806	3	0.922523	1.86793e-64	4.12421e-60	0.593	0.297
grb2b	ENSDARG00000038059	LL0000011697	3	1.56289	1.80418e-62	3.98346e-58	0.357	0.121
h3f3d	ENSDARG00000045248	LL0000011908	3	0.572673	1.40436e-58	3.10069e-54	0.912	0.926
CELA1 (1 of many)	ENSDARG00000017314		3	0.522146	2.47129e-57	5.45637e-53	0.825	0.844
gpm6ab	ENSDARG00000004621	LL0000011572	3	1.14964	5.71192e-57	1.26114e-52	0.503	0.229
rorab	ENSDARG00000001910	LL0000023863	3	1.32185	9.32153e-57	2.0581e-52	0.29	0.086
scg3	ENSDARG00000086288	LL0000024280	3	1.09182	1.38574e-56	3.05957e-52	0.279	0.076
nova2	ENSDARG00000017673	LL0000020494	3	1.23145	2.00994e-53	4.43774e-49	0.476	0.226
h3f3b.1.2	ENSDARG00000068434		3	1.19921	5.52007e-53	1.21878e-48	0.663	0.547
prss59.1	ENSDARG00000079274	LL0000022708	3	0.526377	7.77992e-53	1.71773e-48	0.804	0.806
mdh1aa	ENSDARG00000017772	LL0000018801	3	1.11076	6.92782e-52	1.52959e-47	0.622	0.43
si:ch211-195b13.1	ENSDARG00000016623	LL0000025388	3	1.63507	1.03622e-51	2.28787e-47	0.283	0.087
si:ch73-281n10.2	ENSDARG00000097102	LL0000026414	3	0.817278	4.96287e-51	1.09575e-46	0.802	0.764
cpe	ENSDARG00000055874	LL0000006134	3	1.13052	2.7148e-47	5.994e-43	0.312	0.11
atp6v1g1	ENSDARG00000022315	LL0000001648	3	1.34942	8.2216e-47	1.81525e-42	0.483	0.273
waslb	ENSDARG00000006283	LL0000031975	3	1.49336	9.30109e-46	2.05359e-41	0.272	0.089
ubl3a	ENSDARG00000099532	LL0000031510	3	1.52501	2.09877e-45	4.63387e-41	0.416	0.207
neurod1	ENSDARG00000019566	LL0000020224	3	1.30122	1.7005e-44	3.75452e-40	0.297	0.099
si:dkey-16p21.8	ENSDARG00000096849	LL0000026857	3	1.6522	3.80883e-44	8.40951e-40	0.535	0.365
zfhx4	ENSDARG00000075542	LL0000038415	3	1.39254	3.87577e-43	8.55731e-39	0.342	0.14
fkbp1aa	ENSDARG00000022684	LL0000010373	3	0.786523	3.05115e-42	6.73662e-38	0.73	0.736
atp6v1ba	ENSDARG00000013443	LL0000001640	3	1.23629	3.28651e-41	7.25628e-37	0.31	0.122
btg1	ENSDARG00000027249	LL0000002062	3	1.19755	5.69464e-41	1.25732e-36	0.67	0.645
ppdpfb	ENSDARG00000031317	LL0000022360	3	0.739033	9.69804e-40	2.14123e-35	0.82	0.85
bhlhe40	ENSDARG00000004060	LL0000001891	3	1.70154	2.51768e-39	5.55879e-35	0.438	0.255
tpi1b	ENSDARG00000040988	LL0000030872	3	1.32765	4.28486e-38	9.46054e-34	0.485	0.312
ctbp2a	ENSDARG00000044062	LL0000007714	3	1.08851	2.45669e-35	5.42412e-31	0.256	0.094
marcksl1b	ENSDARG00000035715	LL0000018676	3	1.03879	4.17411e-33	9.21601e-29	0.618	0.5
si:ch211-196l7.4	ENSDARG00000095451	LL0000025415	3	0.967249	1.32933e-32	2.93502e-28	0.631	0.609
atp6v1e1b	ENSDARG00000030694	LL0000001646	3	1.24963	2.39614e-32	5.29043e-28	0.362	0.188
hnrnpaba	ENSDARG00000007960	LL0000012209	3	0.640114	5.68307e-29	1.25476e-24	0.717	0.751
oaz1a	ENSDARG00000071403	LL0000020796	3	0.835303	8.30213e-27	1.83303e-22	0.627	0.642
ndrg3a	ENSDARG00000013087	LL0000020101	3	1.01553	2.50496e-26	5.5307e-22	0.297	0.141
zc4h2	ENSDARG00000015314	LL0000038356	3	0.938921	3.86719e-26	8.53836e-22	0.398	0.235
ywhaqa	ENSDARG00000042539	LL0000038283	3	1.57757	4.42013e-22	9.7592e-18	0.396	0.279
ubald1a	ENSDARG00000002362	LL0000031448	3	1.10261	2.34771e-21	5.18352e-17	0.263	0.134
laptm4a	ENSDARG00000006397	LL0000013529	3	1.34014	2.4287e-21	5.36233e-17	0.382	0.266
atp6ap2	ENSDARG00000008735	LL0000001627	3	1.16424	1.37592e-20	3.03789e-16	0.337	0.209
calm2a	ENSDARG00000031427	LL0000004817	3	1.04855	3.8575e-20	8.51698e-16	0.508	0.453
pkma	ENSDARG00000099730	LL0000022026	3	1.23266	1.97839e-19	4.36809e-15	0.384	0.276
rasgef1ba	ENSDARG00000033614	LL0000023220	3	1.32874	2.4371e-19	5.38087e-15	0.333	0.211
hmgb1a	ENSDARG00000099175	LL0000012168	3	0.856037	3.10602e-19	6.85777e-15	0.562	0.523
eif1b	ENSDARG00000012688	LL0000009479	3	0.613732	1.21416e-18	2.68074e-14	0.656	0.768
pdcl	ENSDARG00000009480	LL0000021487	3	0.999193	1.68405e-18	3.71822e-14	0.292	0.17
tuba1c	ENSDARG00000055216	LL0000031348	3	0.53151	1.8973e-18	4.18904e-14	0.454	0.313
FQ323156.1	ENSDARG00000100697	LL0000010829	3	1.17274	4.44035e-18	9.80385e-14	0.506	0.503
rtn1a	ENSDARG00000006497	LL0000024077	3	0.652909	6.22028e-18	1.37338e-13	0.382	0.241
bhlhe41	ENSDARG00000041691	LL0000001892	3	1.29321	4.62525e-17	1.02121e-12	0.294	0.182
ywhah	ENSDARG00000005560	LL0000038282	3	0.979869	3.61434e-16	7.9801e-12	0.342	0.233
calm3a	ENSDARG00000021811	LL0000039771	3	1.04399	4.75963e-16	1.05088e-11	0.463	0.402
hmgb3a	ENSDARG00000056725	LL0000012172	3	0.68006	1.55839e-15	3.44076e-11	0.51	0.448
znf395b	ENSDARG00000024195	LL0000039598	3	1.08181	5.47533e-15	1.2089e-10	0.38	0.301
cirbpb	ENSDARG00000013351	LL0000005709	3	0.557772	1.55914e-14	3.44243e-10	0.751	0.866
sox4a.1	ENSDARG00000004588		3	1.22372	1.21667e-13	2.68629e-09	0.288	0.18
tob1b	ENSDARG00000021372	LL0000030801	3	1.01802	1.65544e-13	3.65505e-09	0.506	0.525
oaz1b	ENSDARG00000104782	LL0000020797	3	0.855271	2.08418e-13	4.60167e-09	0.521	0.547
h1fx	ENSDARG00000054058	LL0000011897	3	0.741236	2.43575e-13	5.3779e-09	0.474	0.384
apoda.2	ENSDARG00000060350	LL0000001190	3	0.506398	3.41717e-13	7.54477e-09	0.539	0.555
dynll1	ENSDARG00000058454	LL0000009312	3	0.857736	6.17929e-13	1.36432e-08	0.503	0.495
anp32a	ENSDARG00000006487	LL0000001084	3	0.823006	8.09682e-13	1.7877e-08	0.524	0.569
stmn1b	ENSDARG00000033655	LL0000029570	3	0.671299	9.51812e-13	2.10151e-08	0.402	0.295
si:ch211-288g17.3	ENSDARG00000070959	LL0000026030	3	0.634837	2.04327e-12	4.51133e-08	0.458	0.387
h2afva	ENSDARG00000068820	LL0000011900	3	0.948576	5.05379e-12	1.11583e-07	0.391	0.332
ubc	ENSDARG00000102632	LL0000031461	3	0.573905	1.00364e-11	2.21594e-07	0.618	0.725
tsc22d1	ENSDARG00000038306	LL0000031212	3	0.843122	1.21262e-11	2.67734e-07	0.301	0.214
ip6k2b	ENSDARG00000019613	LL0000012815	3	0.962412	1.55493e-11	3.43313e-07	0.324	0.245
glula	ENSDARG00000099776	LL0000011411	3	0.734148	3.84768e-10	8.4953e-06	0.483	0.458
cst3	ENSDARG00000007795	LL0000007470	3	0.865432	6.42688e-09	0.000141899	0.463	0.485
atp5f1b	ENSDARG00000070083	LL0000001603	3	0.612373	7.39914e-09	0.000163366	0.566	0.693
fxyd6l	ENSDARG00000097057	LL0000011012	3	0.919702	8.85944e-09	0.000195608	0.445	0.46
ywhabl	ENSDARG00000040287	LL0000038277	3	0.667209	1.19371e-08	0.000263559	0.488	0.523
smarce1	ENSDARG00000016871	LL0000028959	3	0.80971	3.70215e-08	0.000817398	0.371	0.336
nr1d2a	ENSDARG00000003820	LL0000020569	3	0.976978	4.73999e-08	0.00104654	0.364	0.336
serinc1	ENSDARG00000009106	LL0000024488	3	0.858393	5.335e-08	0.00117791	0.342	0.299
aldoaa	ENSDARG00000011665	LL0000000882	3	0.943315	2.62118e-07	0.0057873	0.416	0.442
cox7b	ENSDARG00000115557	LL0000006119	3	0.604082	2.70605e-07	0.00597468	0.546	0.653
vdac1	ENSDARG00000045132	LL0000031826	3	0.789984	4.59389e-07	0.0101428	0.436	0.476
max	ENSDARG00000024844	LL0000018713	3	0.94247	1.43371e-06	0.0316549	0.315	0.283
hbbe2	ENSDARG00000045143	LL0000011957	4	5.28908	0	0	1	0.16
hbbe1.3	ENSDARG00000087390		4	5.12479	0	0	1	0.235
hbbe1.1	ENSDARG00000113599	LL0000011956	4	5.11857	0	0	0.993	0.212
hbae3	ENSDARG00000079305	LL0000011952	4	5.09801	0	0	1	0.216
hbae1.1.1	ENSDARG00000088330		4	4.96048	0	0	1	0.091
hbbe1.2	ENSDARG00000115405		4	4.87967	0	0	1	0.114
hbae1.1	ENSDARG00000089475	LL0000011950	4	4.86845	0	0	1	0.07
hbae1.3	ENSDARG00000089124	LL0000011951	4	4.54315	0	0	0.998	0.069
cahz	ENSDARG00000011166	LL0000004795	4	3.34191	0	0	0.968	0.045
creg1	ENSDARG00000105154	LL0000007296	4	3.31572	0	0	0.991	0.161
hbae5	ENSDARG00000045142	LL0000011953	4	2.94649	0	0	0.735	0.009
si:ch211-250g4.3	ENSDARG00000092945	LL0000025831	4	2.61659	0	0	0.841	0.009
blvrb	ENSDARG00000096829	LL0000001932	4	2.3104	0	0	0.809	0.07
gpx1a	ENSDARG00000018146	LL0000011670	4	2.24196	0	0	0.859	0.147
mibp	ENSDARG00000101362	LL0000019006	4	2.20651	0	0	0.876	0.101
hemgn	ENSDARG00000096667	LL0000012035	4	2.1862	0	0	0.724	0.011
si:ch211-103n10.5	ENSDARG00000077504	LL0000024884	4	2.16333	0	0	0.258	0.007
nt5c2l1	ENSDARG00000034852	LL0000020673	4	2.10842	0	0	0.717	0.013
MFAP4 (1 of many).8	ENSDARG00000092806	LL0000024758	4	1.96191	0	0	0.302	0.008
alas2	ENSDARG00000038643	LL0000000858	4	1.81512	0	0	0.576	0.008
si:ch211-207c6.2	ENSDARG00000095304	LL0000025496	4	1.81196	0	0	0.472	0.007
MFAP4 (1 of many).7	ENSDARG00000093877		4	1.67124	0	0	0.329	0.012
slc4a1a	ENSDARG00000012881	LL0000028797	4	1.62165	0	0	0.479	0.011
MFAP4 (1 of many).10	ENSDARG00000094408		4	1.60334	0	0	0.306	0.011
zgc:163057	ENSDARG00000045144	LL0000038871	4	1.43476	0	0	0.452	0.005
lmo2	ENSDARG00000095019	LL0000013735	4	1.39799	0	0	0.465	0.026
si:ch211-227m13.1	ENSDARG00000096917	LL0000025690	4	1.35946	0	0	0.429	0.017
slc6a22.2	ENSDARG00000001354	LL0000028843	4	1.33223	0	0	0.362	0.009
nmt1b	ENSDARG00000057206	LL0000020433	4	1.0534	0	0	0.329	0.007
epb41b	ENSDARG00000029019	LL0000009687	4	1.01938	0	0	0.316	0.007
gp1bb	ENSDARG00000074441	LL0000011528	4	0.993239	0	0	0.286	0.005
zgc:56095	ENSDARG00000018461	LL0000039165	4	1.74379	4.67637e-290	1.03249e-285	0.724	0.135
fth1a	ENSDARG00000015551	LL0000010903	4	2.92818	1.03879e-266	2.29355e-262	0.998	0.781
prdx2	ENSDARG00000025350	LL0000022533	4	2.31934	4.07883e-260	9.00565e-256	0.998	0.685
TCIM (1 of many)	ENSDARG00000076858	LL0000030090	4	1.15184	4.54782e-252	1.00411e-247	0.353	0.026
faxdc2	ENSDARG00000023820	LL0000010162	4	1.32074	1.07546e-245	2.37451e-241	0.56	0.078
eef2l2	ENSDARG00000035256	LL0000009409	4	1.3842	4.41474e-244	9.74731e-240	0.486	0.059
tmod4	ENSDARG00000020890	LL0000030672	4	1.13121	2.19537e-229	4.84715e-225	0.426	0.045
tspo	ENSDARG00000026655	LL0000031266	4	1.77625	1.16687e-219	2.57633e-215	0.813	0.268
mterf3	ENSDARG00000003207	LL0000019687	4	1.71643	5.20701e-195	1.14965e-190	0.447	0.067
aqp1a.1	ENSDARG00000023713	LL0000001212	4	0.586344	9.13582e-169	2.0171e-164	0.442	0.065
clic2	ENSDARG00000010625	LL0000005798	4	0.991467	1.02e-162	2.25206e-158	0.44	0.069
vdac2	ENSDARG00000013623	LL0000031827	4	1.176	2.48149e-131	5.47888e-127	0.908	0.665
histh1l	ENSDARG00000035519	LL0000012141	4	1.12654	2.59519e-122	5.72991e-118	0.954	0.637
ccni	ENSDARG00000068214	LL0000005177	4	1.22202	6.69266e-121	1.47767e-116	0.896	0.616
tpd52l2b	ENSDARG00000013655	LL0000030865	4	1.27135	5.41807e-112	1.19625e-107	0.629	0.24
rhag	ENSDARG00000019253	LL0000023629	4	0.605637	2.41574e-91	5.33371e-87	0.424	0.102
bloc1s6	ENSDARG00000042933	LL0000001930	4	1.20892	1.39545e-85	3.08101e-81	0.576	0.238
tsc22d2	ENSDARG00000041839	LL0000031213	4	1.20968	2.74657e-85	6.06416e-81	0.378	0.1
purba	ENSDARG00000068822	LL0000022937	4	1.22226	3.67128e-85	8.10581e-81	0.5	0.176
slc16a10	ENSDARG00000020984	LL0000028502	4	0.938441	2.39979e-70	5.29851e-66	0.417	0.134
rbm24a	ENSDARG00000102995	LL0000023283	4	0.69229	1.47644e-67	3.25984e-63	0.251	0.051
bnip3lb	ENSDARG00000028067	LL0000001971	4	1.01776	5.892e-65	1.30089e-60	0.442	0.163
bida	ENSDARG00000069290	LL0000001905	4	0.845762	2.27197e-64	5.01629e-60	0.279	0.068
tmem14ca	ENSDARG00000110836	LL0000030486	4	0.95406	3.91712e-64	8.6486e-60	0.385	0.128
mt2	ENSDARG00000041623	LL0000019674	4	1.35057	2.50233e-59	5.5249e-55	0.56	0.267
mibp2	ENSDARG00000101844	LL0000019007	4	0.654962	8.12765e-52	1.7945e-47	0.931	0.798
arl6ip1	ENSDARG00000054578	LL0000001367	4	0.810086	2.9465e-50	6.50557e-46	0.647	0.394
BX936337.1	ENSDARG00000092870	LL0000003761	4	0.937213	5.80244e-47	1.28112e-42	0.514	0.268
clgn	ENSDARG00000009315	LL0000005796	4	0.748948	1.60614e-46	3.54621e-42	0.256	0.073
gabarapa	ENSDARG00000035557	LL0000011049	4	0.916348	3.26609e-46	7.2112e-42	0.525	0.282
si:ch211-260e23.9	ENSDARG00000102572	LL0000025887	4	0.882932	1.22723e-44	2.7096e-40	0.539	0.296
zgc:92606	ENSDARG00000040971	LL0000039289	4	0.835807	1.62407e-40	3.58579e-36	0.578	0.366
gabarapb	ENSDARG00000052082	LL0000011050	4	0.601581	3.93896e-38	8.69684e-34	0.843	0.738
pim2	ENSDARG00000059001	LL0000021813	4	0.725078	3.33359e-37	7.36024e-33	0.263	0.089
ppp1r14bb	ENSDARG00000030161	LL0000022423	4	0.740626	1.81853e-34	4.01514e-30	0.3	0.118
fam53b	ENSDARG00000016156	LL0000010089	4	0.747078	3.22813e-34	7.12739e-30	0.281	0.109
selenoj	ENSDARG00000087277	LL0000024400	4	0.809422	5.69845e-34	1.25816e-29	0.401	0.2
ISCU (1 of many)	ENSDARG00000035596	LL0000012894	4	0.868195	1.52971e-31	3.37744e-27	0.472	0.295
pik3ip1	ENSDARG00000003281	LL0000021802	4	0.623207	1.18203e-30	2.60981e-26	0.279	0.11
ap2m1a	ENSDARG00000002790	LL0000001129	4	0.712915	9.38452e-30	2.07201e-25	0.482	0.294
tuba8l4	ENSDARG00000006260	LL0000031355	4	0.563434	1.16923e-29	2.58154e-25	0.636	0.462
prps1a	ENSDARG00000015524	LL0000022673	4	0.781893	3.45418e-29	7.62649e-25	0.394	0.214
glrx5	ENSDARG00000043665	LL0000011397	4	0.690182	6.06415e-29	1.3389e-24	0.306	0.135
zfand5b	ENSDARG00000002271	LL0000038411	4	0.878165	2.32852e-28	5.14114e-24	0.452	0.27
mycbp	ENSDARG00000091001	LL0000019807	4	0.780987	2.58936e-28	5.71704e-24	0.32	0.153
zgc:163080	ENSDARG00000095157	LL0000038876	4	0.775617	3.80815e-25	8.40802e-21	0.316	0.16
rnf10	ENSDARG00000079687	LL0000023752	4	0.705228	2.34706e-23	5.18207e-19	0.445	0.284
castor2	ENSDARG00000018985	LL0000004949	4	0.725136	3.09004e-23	6.82249e-19	0.313	0.159
fam210b	ENSDARG00000052638	LL0000010062	4	0.559605	2.09091e-17	4.61651e-13	0.256	0.131
pfkfb4b	ENSDARG00000029075	LL0000021636	4	0.596569	5.59897e-16	1.2362e-11	0.553	0.444
adka	ENSDARG00000039429	LL0000000384	4	0.627262	1.09842e-14	2.4252e-10	0.253	0.142
h1fx	ENSDARG00000054058	LL0000011897	4	0.811206	2.17458e-14	4.80126e-10	0.502	0.383
ccng1	ENSDARG00000076667	LL0000005174	4	0.544659	1.07374e-12	2.37072e-08	0.56	0.505
edf1	ENSDARG00000009950	LL0000009379	4	0.508831	1.95244e-12	4.31079e-08	0.59	0.549
nupr1a	ENSDARG00000094300	LL0000020768	4	0.570258	2.30354e-11	5.08598e-07	0.445	0.35
il10rb	ENSDARG00000078042	LL0000012638	4	0.624257	4.17481e-11	9.21756e-07	0.274	0.176
lamtor4	ENSDARG00000045542	LL0000013524	4	0.584751	3.14699e-09	6.94824e-05	0.318	0.235
STMP1	ENSDARG00000093058	LL0000029577	4	0.529661	3.85927e-09	8.52089e-05	0.426	0.358
ypel5	ENSDARG00000088929	LL0000038267	4	0.547423	2.23528e-08	0.000493528	0.263	0.182
nusap1	ENSDARG00000002403	LL0000020771	5	1.76872	0	0	0.596	0.026
cdk1	ENSDARG00000087554	LL0000005346	5	1.57189	0	0	0.571	0.031
ube2c	ENSDARG00000114670	LL0000031465	5	1.53027	0	0	0.518	0.024
si:ch211-69g19.2	ENSDARG00000070656	LL0000026126	5	1.52187	0	0	0.404	0.013
ccna2	ENSDARG00000011094	LL0000005160	5	1.38904	0	0	0.631	0.031
hes2.2	ENSDARG00000068168	LL0000012067	5	1.35779	0	0	0.323	0.009
mki67	ENSDARG00000091150	LL0000019348	5	1.25214	0	0	0.601	0.036
cks1b	ENSDARG00000007971	LL0000005732	5	1.16964	0	0	0.566	0.053
ascl1a	ENSDARG00000038386	LL0000001472	5	1.16041	0	0	0.445	0.026
tpx2	ENSDARG00000078654	LL0000030901	5	1.14304	0	0	0.472	0.021
mad2l1	ENSDARG00000004713	LL0000018517	5	1.14201	0	0	0.512	0.03
top2a	ENSDARG00000024488	LL0000030823	5	1.11521	0	0	0.477	0.023
aspm	ENSDARG00000103754	LL0000001499	5	1.0822	0	0	0.41	0.015
aurkb	ENSDARG00000037640	LL0000001690	5	1.05405	0	0	0.518	0.034
plk1	ENSDARG00000058471	LL0000022136	5	0.939043	0	0	0.41	0.019
ccnb3	ENSDARG00000034855	LL0000005164	5	0.90144	0	0	0.377	0.015
dlgap5	ENSDARG00000045167	LL0000008989	5	0.897318	0	0	0.482	0.023
foxn4	ENSDARG00000010591	LL0000010613	5	0.882406	0	0	0.431	0.011
cenpf	ENSDARG00000055133	LL0000005429	5	0.881279	0	0	0.369	0.01
cdca8	ENSDARG00000043137	LL0000005309	5	0.87926	0	0	0.377	0.016
birc5a	ENSDARG00000075621	LL0000001913	5	0.877363	0	0	0.394	0.018
ccnb1	ENSDARG00000051923	LL0000005161	5	0.85607	0	0	0.34	0.009
cdc20	ENSDARG00000100741	LL0000005274	5	0.848013	0	0	0.367	0.011
kifc1	ENSDARG00000001558	LL0000013328	5	0.788313	0	0	0.377	0.015
CABZ01058261.1	ENSDARG00000099194	LL0000004224	5	0.778064	0	0	0.391	0.019
prc1a	ENSDARG00000100918	LL0000022509	5	0.744841	0	0	0.313	0.008
cks2	ENSDARG00000071410	LL0000039776	5	0.726138	0	0	0.353	0.016
kif11	ENSDARG00000010948	LL0000013282	5	0.674892	0	0	0.288	0.008
ncapg	ENSDARG00000070109	LL0000020045	5	0.669585	2.37694e-307	5.24806e-303	0.383	0.02
g2e3	ENSDARG00000001313	LL0000011036	5	0.752958	3.32849e-304	7.34898e-300	0.345	0.016
spc24	ENSDARG00000093622	LL0000029254	5	0.78731	1.19868e-301	2.64657e-297	0.394	0.023
si:dkey-238o13.4	ENSDARG00000078847	LL0000027272	5	1.06627	6.38659e-293	1.41009e-288	0.256	0.007
kpna2	ENSDARG00000038066	LL0000013441	5	1.31899	1.95197e-289	4.30975e-285	0.345	0.017
hes6	ENSDARG00000019335	LL0000012068	5	1.3975	5.54947e-275	1.22527e-270	0.631	0.077
spc25	ENSDARG00000078433	LL0000029255	5	0.725475	9.6341e-275	2.12711e-270	0.41	0.028
zgc:173552.3	ENSDARG00000115644	LL0000040276	5	0.769668	8.98239e-272	1.98322e-267	0.291	0.012
cdc25b	ENSDARG00000010792	LL0000005276	5	0.798975	3.13189e-269	6.91489e-265	0.426	0.032
dla	ENSDARG00000010791	LL0000008966	5	1.14642	3.08373e-260	6.80858e-256	0.518	0.052
lbr	ENSDARG00000014013	LL0000013553	5	1.38526	1.27594e-251	2.81714e-247	0.741	0.131
armc1l	ENSDARG00000020887	LL0000001379	5	0.621958	1.72588e-251	3.81056e-247	0.332	0.019
zgc:110540	ENSDARG00000054929	LL0000038518	5	1.27988	4.33607e-246	9.57362e-242	0.539	0.062
insm1a	ENSDARG00000091756	LL0000012790	5	1.42206	4.34335e-245	9.58969e-241	0.507	0.053
kif22	ENSDARG00000102624	LL0000013304	5	0.748067	1.43583e-242	3.17018e-238	0.399	0.032
sinhcafl.1	ENSDARG00000078118		5	1.41634	2.32567e-234	5.13484e-230	0.771	0.148
gadd45gb.1	ENSDARG00000016725	LL0000011091	5	0.898657	4.04664e-234	8.93457e-230	0.356	0.025
smc2	ENSDARG00000017744	LL0000028963	5	0.672156	2.00102e-232	4.41805e-228	0.364	0.027
pbk	ENSDARG00000007221	LL0000021335	5	0.558068	4.15752e-226	9.17938e-222	0.31	0.019
tuba1b	ENSDARG00000045367	LL0000031347	5	0.921155	2.12074e-224	4.68238e-220	0.458	0.048
ptprua	ENSDARG00000092638	LL0000022915	5	0.604643	3.96016e-224	8.74364e-220	0.294	0.017
cenpw	ENSDARG00000092136	LL0000005441	5	0.78508	4.55826e-224	1.00642e-219	0.412	0.038
rrm2	ENSDARG00000020711	LL0000039875	5	1.7389	3.25658e-220	7.19021e-216	0.472	0.053
her15.1	ENSDARG00000054562	LL0000012046	5	1.4995	2.65785e-215	5.86827e-211	0.612	0.092
cldn5b	ENSDARG00000014059	LL0000005772	5	0.964974	1.44267e-211	3.18528e-207	0.34	0.025
rrm1	ENSDARG00000014017	LL0000024032	5	1.01301	9.18039e-211	2.02694e-206	0.496	0.062
pttg1	ENSDARG00000075421	LL0000022923	5	0.556472	6.47011e-209	1.42854e-204	0.296	0.019
hmga1a	ENSDARG00000028335	LL0000012165	5	2.05467	2.08131e-208	4.59533e-204	0.981	0.578
pclaf	ENSDARG00000097691	LL0000021431	5	1.04385	5.21313e-208	1.15101e-203	0.526	0.07
hmgb2b	ENSDARG00000053990	LL0000012171	5	1.91442	2.54613e-205	5.62161e-201	0.978	0.577
notch1a	ENSDARG00000103554	LL0000020483	5	0.60877	3.54881e-200	7.83541e-196	0.35	0.029
hmgn2	ENSDARG00000099572	LL0000012179	5	2.3006	8.77689e-200	1.93785e-195	0.989	0.81
hmgb2a	ENSDARG00000029722	LL0000012170	5	2.2501	8.07012e-199	1.7818e-194	0.981	0.698
her15.1.1	ENSDARG00000054560		5	1.33016	1.9637e-194	4.33565e-190	0.445	0.051
msi1	ENSDARG00000010710	LL0000019639	5	0.792373	7.87213e-194	1.73809e-189	0.585	0.089
ncapd2	ENSDARG00000005058	LL0000020043	5	0.532685	8.92154e-194	1.96979e-189	0.299	0.022
h2afvb	ENSDARG00000116491	LL0000011901	5	1.62292	7.21558e-193	1.59313e-188	0.976	0.539
cdca5	ENSDARG00000044437	LL0000005306	5	0.517906	1.61557e-192	3.56702e-188	0.31	0.023
CABZ01005379.1	ENSDARG00000117637	LL0000003989	5	0.750044	6.20351e-192	1.36967e-187	0.404	0.043
rrm2.1	ENSDARG00000078069	LL0000040133	5	1.567	9.98377e-192	2.20432e-187	0.431	0.051
slc29a2	ENSDARG00000001767	LL0000028656	5	0.668151	8.58834e-184	1.89622e-179	0.288	0.021
tuba1a	ENSDARG00000001889	LL0000031346	5	1.28776	3.05291e-183	6.74053e-179	0.803	0.193
olig2	ENSDARG00000040946	LL0000020873	5	1.42384	3.40797e-182	7.52445e-178	0.278	0.02
marcksb	ENSDARG00000008803	LL0000018674	5	1.08797	6.06833e-182	1.33983e-177	0.844	0.213
h2afx	ENSDARG00000029406	LL0000011902	5	1.09209	1.19813e-180	2.64535e-176	0.558	0.094
hmgb1b	ENSDARG00000030479	LL0000012169	5	1.50035	1.87783e-180	4.14607e-176	0.973	0.444
h3f3b.1	ENSDARG00000020504	LL0000039823	5	1.83812	2.32502e-180	5.1334e-176	0.968	0.609
krcp	ENSDARG00000040224	LL0000013451	5	0.571985	2.63139e-176	5.80986e-172	0.302	0.025
lmnb1	ENSDARG00000044299	LL0000013731	5	0.865957	1.32257e-173	2.92009e-169	0.558	0.095
si:ch211-156b7.4	ENSDARG00000101707	LL0000025188	5	1.08991	6.03799e-171	1.33313e-166	0.706	0.165
si:ch211-288g17.3	ENSDARG00000070959	LL0000026030	5	1.32998	4.41807e-168	9.75466e-164	0.922	0.368
cadm3	ENSDARG00000057013	LL0000004790	5	0.612827	4.19847e-166	9.2698e-162	0.367	0.039
mibp	ENSDARG00000101362	LL0000019006	5	1.16665	1.59119e-164	3.51319e-160	0.612	0.118
cdc14b	ENSDARG00000021483	LL0000005272	5	0.93274	7.25114e-164	1.60098e-159	0.488	0.077
zgc:55461	ENSDARG00000041723	LL0000039158	5	0.652347	2.85746e-162	6.30899e-158	0.337	0.035
enc3	ENSDARG00000058322	LL0000009639	5	0.775872	7.44722e-162	1.64427e-157	0.353	0.039
tp53inp2	ENSDARG00000088178	LL0000030852	5	1.25704	8.06667e-161	1.78104e-156	0.534	0.095
si:ch211-137a8.4	ENSDARG00000078748	LL0000025074	5	0.902455	1.81621e-159	4.01001e-155	0.741	0.17
EGFP	EGFP		5	1.31725	2.51399e-156	5.55064e-152	0.261	0.021
zgc:165555.7	ENSDARG00000105409	LL0000040289	5	0.521728	1.64336e-154	3.62837e-150	0.251	0.019
seta	ENSDARG00000031495	LL0000024527	5	1.31302	1.42129e-153	3.13806e-149	0.919	0.452
fabp7a	ENSDARG00000007697	LL0000009941	5	1.12803	1.45441e-153	3.21119e-149	0.889	0.343
pax6a	ENSDARG00000103379	LL0000021325	5	0.693908	1.15273e-152	2.54512e-148	0.35	0.039
stmn1a	ENSDARG00000004169	LL0000029569	5	1.45706	7.90936e-151	1.74631e-146	0.852	0.328
dek	ENSDARG00000070108	LL0000008817	5	0.809744	1.29785e-150	2.86552e-146	0.512	0.091
arpp19b	ENSDARG00000039880	LL0000001408	5	0.912854	2.22649e-149	4.91587e-145	0.571	0.118
cirbpa	ENSDARG00000103672	LL0000005708	5	1.13598	3.4191e-149	7.54904e-145	0.978	0.7
slbp	ENSDARG00000100558	LL0000028469	5	0.736486	5.30929e-148	1.17224e-143	0.383	0.05
bub3	ENSDARG00000075883	LL0000002092	5	0.781788	9.07855e-148	2.00445e-143	0.472	0.08
marcksa	ENSDARG00000004049	LL0000018673	5	0.893325	1.34449e-147	2.96851e-143	0.604	0.123
mxd3	ENSDARG00000098350	LL0000019779	5	0.639165	5.8275e-145	1.28665e-140	0.385	0.051
zbtb18	ENSDARG00000028228	LL0000038304	5	0.714714	7.4995e-143	1.65581e-138	0.404	0.057
h2afva	ENSDARG00000068820	LL0000011900	5	1.05181	1.534e-142	3.38692e-138	0.871	0.312
tubb2b	ENSDARG00000098591	LL0000031358	5	1.53749	6.19957e-142	1.3688e-137	0.871	0.38
rad21a	ENSDARG00000006092	LL0000023123	5	1.09169	3.07508e-141	6.78947e-137	0.83	0.299
mycla	ENSDARG00000006003	LL0000019811	5	0.500603	6.8543e-139	1.51336e-134	0.321	0.037
si:ch211-222l21.1	ENSDARG00000076532	LL0000025644	5	1.46338	6.17582e-136	1.36356e-131	0.933	0.521
otx2b	ENSDARG00000011235	LL0000021139	5	0.883739	9.70809e-136	2.14345e-131	0.321	0.038
six6b	ENSDARG00000031316	LL0000028446	5	0.596987	6.75095e-135	1.49054e-130	0.326	0.038
tmem35	ENSDARG00000052567	LL0000030609	5	0.637655	7.27369e-135	1.60596e-130	0.383	0.053
crabp1a	ENSDARG00000045926	LL0000007263	5	0.869422	1.14544e-134	2.52902e-130	0.31	0.035
chaf1a	ENSDARG00000062152	LL0000005556	5	0.715373	3.92179e-133	8.65892e-129	0.453	0.079
tubb4b	ENSDARG00000002344	LL0000031359	5	1.24754	1.99195e-131	4.39803e-127	0.981	0.752
hmgb1a	ENSDARG00000099175	LL0000012168	5	1.20358	3.22819e-131	7.12751e-127	0.951	0.507
khdrbs1a	ENSDARG00000052856	LL0000013267	5	0.997459	7.31298e-129	1.61463e-124	0.976	0.682
ptmab	ENSDARG00000101766	LL0000022860	5	1.18046	5.86987e-128	1.29601e-123	0.995	0.859
sox11b	ENSDARG00000095743	LL0000029180	5	0.870908	6.18907e-128	1.36648e-123	0.59	0.132
ran	ENSDARG00000057026	LL0000023166	5	0.873783	8.73044e-128	1.92759e-123	0.978	0.767
cdk2	ENSDARG00000026577	LL0000005357	5	0.570389	2.30695e-127	5.09353e-123	0.358	0.051
rbbp4	ENSDARG00000029058	LL0000023255	5	0.914273	4.22875e-125	9.33666e-121	0.593	0.143
her4.2	ENSDARG00000094426	LL0000012050	5	0.847896	2.94804e-123	6.50898e-119	0.385	0.059
hnrnpa0b	ENSDARG00000036162	LL0000012204	5	1.06777	1.33205e-122	2.94104e-118	0.935	0.542
snrpd1	ENSDARG00000011648	LL0000029078	5	0.938307	2.70068e-120	5.96282e-116	0.817	0.321
ilf2	ENSDARG00000014591	LL0000012693	5	0.842225	2.07383e-119	4.57882e-115	0.763	0.253
dut	ENSDARG00000106529	LL0000009295	5	0.992473	5.91055e-119	1.30499e-114	0.52	0.115
si:ch73-1a9.3	ENSDARG00000103919	LL0000026297	5	0.907555	7.14993e-118	1.57863e-113	0.997	0.861
her12	ENSDARG00000032963	LL0000012044	5	1.13055	4.91724e-114	1.08568e-109	0.278	0.034
pou3f1	ENSDARG00000009823	LL0000022333	5	0.761418	1.17372e-112	2.59147e-108	0.402	0.069
anp32a	ENSDARG00000006487	LL0000001084	5	0.918111	1.70302e-112	3.76009e-108	0.938	0.552
ddx39ab	ENSDARG00000015111	LL0000008782	5	0.858014	3.04306e-110	6.71876e-106	0.739	0.258
smarca5	ENSDARG00000052348	LL0000028946	5	0.584927	3.64019e-110	8.03718e-106	0.353	0.057
her4.4	ENSDARG00000009822	LL0000012052	5	0.966211	2.31141e-109	5.10337e-105	0.394	0.069
ss18l2	ENSDARG00000101085	LL0000029415	5	0.684654	2.83738e-109	6.26465e-105	0.41	0.078
si:ch73-281n10.2	ENSDARG00000097102	LL0000026414	5	1.13886	1.70658e-108	3.76797e-104	0.968	0.758
anp32b	ENSDARG00000023330	LL0000001085	5	0.929119	1.45252e-107	3.20701e-103	0.79	0.327
nucks1a	ENSDARG00000078473	LL0000020711	5	0.908922	1.32829e-105	2.93273e-101	0.846	0.357
hnrnpabb	ENSDARG00000099865	LL0000012210	5	0.927784	4.21737e-105	9.31153e-101	0.906	0.498
snrpb	ENSDARG00000011125	LL0000029075	5	0.857883	1.24348e-104	2.74549e-100	0.876	0.435
cirbpb	ENSDARG00000013351	LL0000005709	5	0.773717	2.77886e-102	6.13544e-98	0.995	0.855
sae1	ENSDARG00000010487	LL0000024166	5	0.526244	3.9672e-101	8.75918e-97	0.326	0.052
neurod4	ENSDARG00000003469	LL0000020226	5	0.86047	1.85518e-100	4.09605e-96	0.385	0.07
nono	ENSDARG00000020482	LL0000020468	5	0.808341	1.20855e-99	2.66836e-95	0.69	0.235
smarcd1	ENSDARG00000019004	LL0000028955	5	0.656926	1.36264e-99	3.00858e-95	0.542	0.138
snrpf	ENSDARG00000105037	LL0000029083	5	0.848106	1.45291e-99	3.20787e-95	0.784	0.33
hmgn6	ENSDARG00000087636	LL0000012181	5	0.802116	6.71749e-99	1.48315e-94	0.981	0.698
im:7152348	ENSDARG00000097082	LL0000012718	5	0.978381	2.6596e-98	5.87213e-94	0.464	0.109
hnrnpub	ENSDARG00000004735	LL0000012223	5	0.667508	1.80294e-97	3.9807e-93	0.507	0.126
snrpg	ENSDARG00000099667	LL0000029084	5	0.876633	5.22342e-97	1.15328e-92	0.747	0.294
pcna	ENSDARG00000054155	LL0000021440	5	1.29214	1.98294e-96	4.37814e-92	0.642	0.226
si:ch211-51e12.7	ENSDARG00000045914	LL0000026057	5	0.739594	5.65357e-96	1.24825e-91	0.76	0.287
sumo3a	ENSDARG00000028119	LL0000029678	5	0.890771	1.8658e-95	4.11949e-91	0.895	0.495
lrrn1	ENSDARG00000060115	LL0000018410	5	0.520345	3.2226e-95	7.11517e-91	0.342	0.058
snrpe	ENSDARG00000033175	LL0000029082	5	0.808024	4.56851e-95	1.00868e-90	0.806	0.349
tuba8l4	ENSDARG00000006260	LL0000031355	5	1.11141	7.2601e-95	1.60296e-90	0.833	0.455
sumo3b	ENSDARG00000035993	LL0000029679	5	0.929038	4.12656e-93	9.11103e-89	0.717	0.277
hnrnpaba	ENSDARG00000007960	LL0000012209	5	0.798998	8.42023e-93	1.8591e-88	0.962	0.741
banf1	ENSDARG00000037009	LL0000001790	5	0.991597	9.77778e-93	2.15884e-88	0.687	0.274
ccnd1	ENSDARG00000101637	LL0000005166	5	1.1567	1.02421e-92	2.26136e-88	0.625	0.224
lig1	ENSDARG00000060041	LL0000013663	5	0.712073	1.43975e-92	3.17882e-88	0.423	0.095
hnrnpa0l.1	ENSDARG00000036161	LL0000039827	5	0.723344	7.58713e-91	1.67516e-86	0.973	0.764
her4.1	ENSDARG00000056732	LL0000012049	5	0.741817	3.10619e-89	6.85815e-85	0.361	0.069
smarca4a	ENSDARG00000077226	LL0000028945	5	0.570163	9.09294e-88	2.00763e-83	0.499	0.132
nasp	ENSDARG00000039208	LL0000019993	5	0.602422	1.72695e-87	3.81294e-83	0.412	0.094
hpf1	ENSDARG00000057114	LL0000012298	5	0.523111	2.12533e-86	4.69251e-82	0.353	0.07
cbx3a	ENSDARG00000003860	LL0000004998	5	0.828175	2.17233e-86	4.79629e-82	0.782	0.369
phf5a	ENSDARG00000045155	LL0000021710	5	0.686317	2.12362e-85	4.68874e-81	0.574	0.176
hnrnpa0a	ENSDARG00000089302	LL0000012203	5	0.570301	2.7564e-85	6.08586e-81	0.752	0.272
her4.2.1	ENSDARG00000056729		5	0.876469	3.41352e-85	7.53671e-81	0.372	0.076
h3f3b.1.1	ENSDARG00000068436	LL0000040151	5	0.847217	3.58517e-85	7.91569e-81	0.911	0.545
chrac1	ENSDARG00000042337	LL0000005627	5	0.672719	4.73392e-85	1.0452e-80	0.507	0.144
smc1al	ENSDARG00000058203	LL0000028961	5	0.716314	7.8459e-85	1.7323e-80	0.652	0.226
top1l	ENSDARG00000070545	LL0000030821	5	0.693457	8.05984e-85	1.77953e-80	0.472	0.123
rbm4.3	ENSDARG00000022129	LL0000023298	5	0.778004	1.92885e-84	4.2587e-80	0.852	0.447
chd7	ENSDARG00000075211	LL0000005577	5	0.564522	4.23587e-84	9.35237e-80	0.464	0.117
lsm7	ENSDARG00000058328	LL0000018437	5	0.759089	6.80727e-84	1.50298e-79	0.76	0.341
gpm6aa	ENSDARG00000055455	LL0000011571	5	0.509569	3.50211e-83	7.73232e-79	0.725	0.232
khsrp	ENSDARG00000026489	LL0000013273	5	0.716922	7.26776e-83	1.60465e-78	0.66	0.251
cbx2	ENSDARG00000044938	LL0000004997	5	0.514218	1.13154e-82	2.49833e-78	0.41	0.094
hdac1	ENSDARG00000015427	LL0000011987	5	0.737947	1.12148e-80	2.47612e-76	0.774	0.34
ewsr1b	ENSDARG00000020465	LL0000039796	5	0.690214	1.16901e-80	2.58106e-76	0.69	0.267
smarce1	ENSDARG00000016871	LL0000028959	5	0.624516	4.48568e-79	9.90394e-75	0.768	0.319
apex1	ENSDARG00000045843	LL0000001162	5	0.696119	6.08909e-79	1.34441e-74	0.563	0.184
snrpd2	ENSDARG00000040440	LL0000029079	5	0.717042	7.75127e-79	1.7114e-74	0.755	0.334
rpa3	ENSDARG00000002613	LL0000023876	5	0.6973	1.5985e-78	3.52932e-74	0.491	0.142
tcea1	ENSDARG00000003531	LL0000030066	5	0.54653	1.44521e-77	3.19088e-73	0.606	0.197
sox3	ENSDARG00000053569	LL0000029194	5	0.902453	1.25506e-74	2.77105e-70	0.334	0.072
rpa2	ENSDARG00000037188	LL0000023875	5	0.657905	2.07844e-74	4.58899e-70	0.445	0.123
psma6a	ENSDARG00000019398	LL0000022737	5	0.552264	2.64875e-74	5.84818e-70	0.509	0.155
lfng	ENSDARG00000037879	LL0000013610	5	0.723333	2.66299e-74	5.87962e-70	0.477	0.132
setb	ENSDARG00000003920	LL0000024528	5	0.77631	2.8122e-74	6.20905e-70	0.852	0.512
sox11a	ENSDARG00000077811	LL0000029179	5	0.606786	1.78941e-73	3.95084e-69	0.539	0.166
ppiab	ENSDARG00000103994	LL0000022373	5	0.574299	3.29332e-73	7.27132e-69	0.987	0.849
ddx39aa	ENSDARG00000006225	LL0000008781	5	0.645933	3.73544e-73	8.24749e-69	0.658	0.254
msna	ENSDARG00000058128	LL0000019649	5	0.773343	3.85288e-73	8.50678e-69	0.631	0.238
tma7	ENSDARG00000071670	LL0000030406	5	0.766576	9.52313e-73	2.10261e-68	0.857	0.529
tuba8l	ENSDARG00000042708	LL0000031352	5	1.30329	1.25298e-72	2.76645e-68	0.612	0.262
sf3b5	ENSDARG00000016855	LL0000024557	5	0.593728	1.79142e-72	3.95529e-68	0.625	0.228
snrpd3l	ENSDARG00000076283	LL0000029081	5	0.636012	2.30842e-72	5.09677e-68	0.658	0.259
rtca	ENSDARG00000002215	LL0000024069	5	0.539982	1.90013e-71	4.19529e-67	0.329	0.071
syncrip	ENSDARG00000040184	LL0000029743	5	0.733117	3.3857e-71	7.47528e-67	0.825	0.467
tspan7	ENSDARG00000015759	LL0000031260	5	0.526892	1.73906e-70	3.83968e-66	0.45	0.125
psma5	ENSDARG00000003526	LL0000022736	5	0.650851	5.49575e-70	1.21341e-65	0.623	0.24
fkbp1aa	ENSDARG00000022684	LL0000010373	5	0.615574	8.41565e-70	1.85809e-65	0.954	0.727
hnrnph1l	ENSDARG00000005551	LL0000012215	5	0.598368	1.61278e-69	3.56085e-65	0.518	0.166
nutf2l	ENSDARG00000014499	LL0000020773	5	0.652613	7.95615e-67	1.75664e-62	0.582	0.222
mex3b	ENSDARG00000058369	LL0000018918	5	0.567677	2.91318e-66	6.43201e-62	0.429	0.117
hnrnpa1b	ENSDARG00000036675	LL0000012207	5	0.683376	3.02782e-66	6.68513e-62	0.668	0.289
lsm8	ENSDARG00000091656	LL0000018438	5	0.530508	8.80037e-66	1.94303e-61	0.504	0.165
ahcy	ENSDARG00000005191	LL0000000490	5	0.612723	1.1158e-64	2.46357e-60	0.779	0.393
h3f3b.1.2	ENSDARG00000068434		5	0.650829	1.57886e-64	3.48597e-60	0.871	0.54
snrpc	ENSDARG00000009871	LL0000029077	5	0.516399	4.44857e-64	9.82199e-60	0.553	0.194
rbm8a	ENSDARG00000016516	LL0000023308	5	0.623743	4.18525e-63	9.24062e-59	0.822	0.466
taf15	ENSDARG00000070019	LL0000029919	5	0.610479	1.52743e-62	3.37241e-58	0.615	0.252
ilf3b	ENSDARG00000105177	LL0000012695	5	0.534543	5.52363e-62	1.21956e-57	0.542	0.191
psmb7	ENSDARG00000037962	LL0000022752	5	0.611143	6.21388e-62	1.37196e-57	0.728	0.344
srsf3b	ENSDARG00000059360	LL0000029404	5	0.604434	2.00616e-60	4.4294e-56	0.725	0.345
h3f3c	ENSDARG00000033009	LL0000011907	5	0.646612	3.41499e-60	7.53995e-56	0.962	0.769
lsm3	ENSDARG00000089663	LL0000018433	5	0.505538	4.61564e-60	1.01909e-55	0.593	0.229
cfl1	ENSDARG00000021124	LL0000005532	5	0.557528	4.89203e-60	1.08011e-55	0.957	0.721
mycn	ENSDARG00000006837	LL0000019813	5	0.550899	1.46057e-59	3.2248e-55	0.439	0.133
si:dkey-42i9.4	ENSDARG00000008049	LL0000027656	5	0.650329	1.60138e-59	3.53569e-55	0.739	0.361
adssl	ENSDARG00000012399	LL0000000426	5	0.51171	3.89457e-59	8.59882e-55	0.423	0.131
ppm1g	ENSDARG00000075559	LL0000022399	5	0.513606	1.05501e-58	2.32937e-54	0.456	0.147
ctbp1	ENSDARG00000057007	LL0000007713	5	0.506367	3.04246e-58	6.71746e-54	0.418	0.126
sub1a	ENSDARG00000053446	LL0000029641	5	0.665129	3.10781e-58	6.86172e-54	0.749	0.387
fam76b	ENSDARG00000012432	LL0000010100	5	0.526309	3.11414e-58	6.8757e-54	0.412	0.126
psma2	ENSDARG00000040121	LL0000022733	5	0.534983	4.18875e-58	9.24834e-54	0.542	0.204
snrpa	ENSDARG00000018890	LL0000029073	5	0.506056	5.45847e-58	1.20518e-53	0.509	0.18
u2af1	ENSDARG00000015325	LL0000031431	5	0.601326	3.47795e-57	7.67897e-53	0.566	0.225
lsm6	ENSDARG00000036995	LL0000018436	5	0.54634	4.39112e-57	9.69516e-53	0.601	0.243
rpl22l1	ENSDARG00000010244	LL0000023909	5	0.538235	1.11045e-56	2.45176e-52	0.933	0.699
alyref	ENSDARG00000077732	LL0000000932	5	0.529691	1.12171e-56	2.47661e-52	0.429	0.138
srsf2a	ENSDARG00000057484	LL0000029401	5	0.5923	5.082e-56	1.12205e-51	0.725	0.363
calm2b	ENSDARG00000015050	LL0000004818	5	0.568053	5.20162e-56	1.14847e-51	0.906	0.605
nfybb	ENSDARG00000045611	LL0000020281	5	0.508449	1.2971e-55	2.86387e-51	0.388	0.116
hp1bp3	ENSDARG00000044669	LL0000012290	5	0.507786	3.10207e-55	6.84905e-51	0.733	0.344
eny2	ENSDARG00000070046	LL0000009677	5	0.500955	7.55801e-55	1.66873e-50	0.429	0.139
tgif1	ENSDARG00000059337	LL0000030235	5	0.502646	1.61703e-54	3.57024e-50	0.472	0.161
prmt1	ENSDARG00000010246	LL0000022621	5	0.605936	1.24471e-53	2.74821e-49	0.658	0.312
arl4aa	ENSDARG00000099918	LL0000001359	5	0.500611	3.11028e-53	6.86719e-49	0.28	0.068
psmb1	ENSDARG00000009640	LL0000022741	5	0.558546	5.79656e-53	1.27982e-48	0.677	0.318
crabp2a	ENSDARG00000073978	LL0000007265	5	0.524017	6.07355e-52	1.34098e-47	0.302	0.076
cbx5	ENSDARG00000061187	LL0000005001	5	0.522149	6.07158e-51	1.34054e-46	0.709	0.357
dpy30	ENSDARG00000004427	LL0000009176	5	0.544579	1.13842e-50	2.51351e-46	0.644	0.302
lsm5	ENSDARG00000071573	LL0000018435	5	0.526235	1.06834e-49	2.35879e-45	0.601	0.269
calm3b	ENSDARG00000074057	LL0000004820	5	0.520134	1.39575e-49	3.08167e-45	0.871	0.563
psma8	ENSDARG00000010965	LL0000022740	5	0.503285	2.20063e-48	4.85878e-44	0.642	0.301
srsf7a	ENSDARG00000035325	LL0000029410	5	0.513424	1.55661e-47	3.43683e-43	0.698	0.368
cdca7a	ENSDARG00000077620	LL0000005307	5	0.588898	2.24661e-47	4.96028e-43	0.321	0.093
eif5a2	ENSDARG00000056186	LL0000009539	5	0.614211	2.32776e-45	5.13945e-41	0.801	0.518
morf4l1	ENSDARG00000041155	LL0000019456	5	0.512302	2.28948e-40	5.05495e-36	0.582	0.285
ranbp1	ENSDARG00000014817	LL0000023167	5	0.52631	8.36088e-40	1.846e-35	0.701	0.411
cct3	ENSDARG00000016173	LL0000005211	5	0.505854	4.37256e-36	9.65419e-32	0.655	0.381
arl6ip1	ENSDARG00000054578	LL0000001367	5	0.5014	5.80805e-33	1.28236e-28	0.674	0.395
mycn	ENSDARG00000006837	LL0000019813	6	0.938278	2.08328e-79	4.59968e-75	0.505	0.133
rps12	ENSDARG00000036875	LL0000023964	6	0.549309	3.21764e-74	7.10423e-70	0.99	0.976
rps20	ENSDARG00000036044	LL0000023976	6	0.509083	9.69683e-71	2.14096e-66	1	0.989
rplp2l	ENSDARG00000011201	LL0000023943	6	0.511807	1.21145e-61	2.67476e-57	0.99	0.952
stmn1a	ENSDARG00000004169	LL0000029569	6	0.918839	2.1416e-49	4.72845e-45	0.68	0.337
dut	ENSDARG00000106529	LL0000009295	6	0.750032	1.731e-47	3.82187e-43	0.401	0.122
pcna	ENSDARG00000054155	LL0000021440	6	0.884327	3.2078e-46	7.0825e-42	0.563	0.232
cdca7a	ENSDARG00000077620	LL0000005307	6	0.602816	1.60701e-45	3.54811e-41	0.34	0.094
si:ch211-156b7.4	ENSDARG00000101707	LL0000025188	6	0.680026	2.12027e-45	4.68134e-41	0.485	0.177
mcm4	ENSDARG00000040041	LL0000018773	6	0.549405	6.55491e-42	1.44726e-37	0.385	0.126
apex1	ENSDARG00000045843	LL0000001162	6	0.701672	3.47838e-39	7.67992e-35	0.479	0.19
hmgb2b	ENSDARG00000053990	LL0000012171	6	0.528469	5.89658e-34	1.30191e-29	0.828	0.585
eif5a2	ENSDARG00000056186	LL0000009539	6	0.616494	3.93635e-31	8.69106e-27	0.744	0.522
ccnd1	ENSDARG00000101637	LL0000005166	6	0.699019	6.66228e-31	1.47097e-26	0.489	0.231
snu13b	ENSDARG00000023299	LL0000029091	6	0.653795	2.06675e-30	4.56317e-26	0.634	0.385
nop58	ENSDARG00000104353	LL0000020475	6	0.564135	3.70167e-30	8.17291e-26	0.498	0.24
nutf2l	ENSDARG00000014499	LL0000020773	6	0.554652	1.55142e-29	3.42539e-25	0.485	0.228
rpl22l1	ENSDARG00000010244	LL0000023909	6	0.525617	3.49146e-29	7.70879e-25	0.822	0.705
pa2g4a	ENSDARG00000039578	LL0000021193	6	0.570379	2.11583e-28	4.67153e-24	0.511	0.263
cirbpa	ENSDARG00000103672	LL0000005708	6	0.506726	5.05201e-28	1.11543e-23	0.877	0.706
npm1a	ENSDARG00000014329	LL0000020532	6	0.581604	1.40923e-26	3.11144e-22	0.696	0.459
selenoh	ENSDARG00000093022	LL0000024398	6	0.565416	3.22139e-26	7.11251e-22	0.631	0.387
rpa3	ENSDARG00000002613	LL0000023876	6	0.505656	9.20184e-26	2.03167e-21	0.362	0.149
snrpb	ENSDARG00000011125	LL0000029075	6	0.542529	1.61702e-24	3.57021e-20	0.686	0.445
nop10	ENSDARG00000104227	LL0000020469	6	0.51729	2.80572e-22	6.19476e-18	0.667	0.459
nanos1	ENSDARG00000109337	LL0000019972	6	0.648736	4.8653e-13	1.07421e-08	0.314	0.164
id1	ENSDARG00000040764	LL0000012459	6	0.516112	1.55264e-10	3.42806e-06	0.608	0.446
ogna	ENSDARG00000044132	LL0000020833	7	2.80265	4.84058e-264	1.06875e-259	0.713	0.099
aspn	ENSDARG00000002192	LL0000001500	7	1.71785	3.18683e-183	7.03619e-179	0.492	0.061
hyal4	ENSDARG00000051823	LL0000012439	7	1.01668	1.22603e-164	2.70695e-160	0.261	0.016
abi3bpb	ENSDARG00000071095	LL0000000108	7	1.74375	5.50141e-154	1.21466e-149	0.574	0.101
fibina	ENSDARG00000039949	LL0000010348	7	1.36573	2.00632e-151	4.42976e-147	0.515	0.08
mmp2	ENSDARG00000017676	LL0000019407	7	1.5646	1.51899e-148	3.35377e-144	0.769	0.205
col1a2	ENSDARG00000020007	LL0000005996	7	1.60185	3.25422e-144	7.185e-140	0.904	0.304
gsc	ENSDARG00000059073	LL0000011789	7	1.03179	7.28611e-132	1.6087e-127	0.294	0.028
si:ch211-1a19.3	ENSDARG00000100968	LL0000025450	7	1.04732	1.84455e-111	4.07258e-107	0.257	0.025
pdgfrl	ENSDARG00000006456	LL0000021526	7	1.03393	6.77472e-109	1.49579e-104	0.439	0.078
pmp22a	ENSDARG00000105223	LL0000022201	7	0.998499	5.39013e-105	1.19009e-100	0.974	0.424
olfml3b	ENSDARG00000062171	LL0000020871	7	0.987657	1.07303e-104	2.36913e-100	0.469	0.094
cdh11	ENSDARG00000021442	LL0000005316	7	1.00025	2.10622e-100	4.65032e-96	0.548	0.129
sparc	ENSDARG00000019353	LL0000029233	7	1.16319	2.48033e-99	5.47632e-95	0.944	0.434
bmp5	ENSDARG00000101701	LL0000001950	7	0.829209	6.8582e-98	1.51422e-93	0.277	0.034
col1a1a	ENSDARG00000012405	LL0000005994	7	1.04203	9.84622e-98	2.17395e-93	0.818	0.308
si:dkey-12l12.1	ENSDARG00000094422	LL0000026730	7	1.2239	1.01081e-97	2.23176e-93	0.508	0.115
foxc1b	ENSDARG00000055398	LL0000010579	7	0.851702	1.1672e-97	2.57705e-93	0.37	0.061
ctgfa	ENSDARG00000042934	LL0000007729	7	1.47307	3.25073e-96	7.17728e-92	0.574	0.151
timp2a	ENSDARG00000061226	LL0000030331	7	1.01991	6.82077e-93	1.50596e-88	0.601	0.171
dkk3b	ENSDARG00000070683	LL0000008965	7	0.851954	7.45223e-92	1.64538e-87	0.281	0.037
col5a1	ENSDARG00000012593	LL0000006015	7	1.0421	4.2493e-91	9.38202e-87	0.723	0.244
ecrg4a	ENSDARG00000056087	LL0000009365	7	1.41092	2.12939e-90	4.70149e-86	0.515	0.122
serpinf1	ENSDARG00000069048	LL0000024512	7	1.01178	5.48829e-90	1.21176e-85	0.462	0.102
cyr61	ENSDARG00000023062	LL0000008623	7	1.28591	1.27782e-89	2.8213e-85	0.759	0.277
col1a1b	ENSDARG00000035809	LL0000005995	7	1.11177	5.81508e-89	1.28391e-84	0.729	0.259
col11a1b	ENSDARG00000009014	LL0000005979	7	0.913252	1.61973e-88	3.57619e-84	0.452	0.098
mfap2	ENSDARG00000059367	LL0000018921	7	0.997231	6.35057e-88	1.40214e-83	0.69	0.236
krt18a.1	ENSDARG00000018404	LL0000013460	7	0.988316	2.45588e-86	5.42234e-82	0.822	0.336
krt8	ENSDARG00000058358	LL0000013466	7	0.930218	5.00043e-84	1.10405e-79	0.931	0.488
mxra8b	ENSDARG00000062129	LL0000019789	7	1.00122	1.7544e-83	3.87355e-79	0.561	0.159
zgc:162730	ENSDARG00000103720	LL0000038847	7	1.21528	1.98017e-83	4.37201e-79	0.931	0.566
lum	ENSDARG00000045580	LL0000018456	7	1.08782	8.05172e-81	1.77774e-76	0.406	0.086
cxcl12b	ENSDARG00000055100	LL0000008487	7	1.27781	2.40813e-79	5.3169e-75	0.284	0.044
angptl1a	ENSDARG00000012071	LL0000000982	7	1.13349	1.33492e-78	2.94736e-74	0.426	0.099
dcn	ENSDARG00000012066	LL0000008724	7	0.938273	1.67258e-77	3.6929e-73	0.495	0.131
LO018188.1	ENSDARG00000106873	LL0000013825	7	0.971633	1.80329e-77	3.98149e-73	0.267	0.04
krt18b	ENSDARG00000028618	LL0000013462	7	0.982202	1.77672e-74	3.92282e-70	0.779	0.322
fmoda	ENSDARG00000044895	LL0000010422	7	0.660966	5.52168e-73	1.21913e-68	0.581	0.171
cd81a	ENSDARG00000036080	LL0000005254	7	0.905782	1.98655e-71	4.3861e-67	0.931	0.553
fstl1b	ENSDARG00000039576	LL0000010896	7	0.846944	2.34117e-71	5.16907e-67	0.673	0.254
fgfrl1a	ENSDARG00000032617	LL0000010322	7	0.856657	5.67111e-71	1.25212e-66	0.393	0.092
ucmab	ENSDARG00000005485	LL0000031551	7	1.16434	3.70567e-69	8.18175e-65	0.281	0.047
sfrp2	ENSDARG00000070050	LL0000024566	7	1.18256	2.07834e-68	4.58876e-64	0.264	0.044
fosab	ENSDARG00000031683	LL0000010566	7	0.88436	9.16222e-68	2.02293e-63	0.957	0.723
cyp26b1	ENSDARG00000077121	LL0000008556	7	0.768268	8.82292e-67	1.94801e-62	0.399	0.095
cnmd	ENSDARG00000100133	LL0000005897	7	0.509333	3.43468e-65	7.58343e-61	0.449	0.113
rbp4	ENSDARG00000101199	LL0000023321	7	0.903081	4.90348e-64	1.08264e-59	0.927	0.549
fgfbp2b	ENSDARG00000038056	LL0000010313	7	0.903477	1.24336e-63	2.74522e-59	0.297	0.055
col2a1b	ENSDARG00000011407	LL0000006006	7	0.857933	2.87735e-62	6.35291e-58	0.541	0.174
angptl7	ENSDARG00000027582	LL0000000990	7	1.72665	4.50158e-61	9.93904e-57	0.356	0.087
sec61g	ENSDARG00000018637	LL0000024388	7	0.571308	7.51175e-61	1.65852e-56	0.983	0.902
cd99	ENSDARG00000051975	LL0000005261	7	0.963882	3.21278e-59	7.09349e-55	0.459	0.146
anxa1a	ENSDARG00000026726	LL0000001101	7	1.04329	4.11776e-59	9.09159e-55	0.64	0.247
junba	ENSDARG00000074378	LL0000013045	7	0.887657	9.75247e-59	2.15325e-54	0.898	0.567
foxp4	ENSDARG00000076120	LL0000010626	7	0.962193	3.814e-58	8.42092e-54	0.686	0.329
fzd7b	ENSDARG00000027589	LL0000011028	7	0.827706	4.78002e-58	1.05538e-53	0.465	0.147
mycb	ENSDARG00000007241	LL0000019806	7	0.991237	4.10819e-57	9.07047e-53	0.614	0.256
socs3a	ENSDARG00000025428	LL0000029136	7	0.826058	1.10366e-53	2.43677e-49	0.861	0.505
socs3b	ENSDARG00000026611	LL0000029137	7	0.826853	2.33083e-53	5.14624e-49	0.627	0.267
selenop	ENSDARG00000093549	LL0000024463	7	0.796182	4.46457e-53	9.85732e-49	0.818	0.471
f3b	ENSDARG00000005673	LL0000009918	7	1.0768	1.30281e-52	2.87647e-48	0.426	0.133
loxl2b	ENSDARG00000044074	LL0000018278	7	0.715338	2.36072e-52	5.21223e-48	0.373	0.103
sdc4	ENSDARG00000059906	LL0000024337	7	0.703924	3.50856e-52	7.74655e-48	0.868	0.529
ntd5	ENSDARG00000040944	LL0000020680	7	0.925541	5.3431e-52	1.1797e-47	0.515	0.18
mmp14a	ENSDARG00000002235	LL0000019398	7	0.768533	5.55097e-52	1.2256e-47	0.366	0.102
klf2a	ENSDARG00000042667	LL0000013361	7	1.11425	2.00673e-51	4.43065e-47	0.429	0.136
dap1b	ENSDARG00000086842		7	0.691207	5.79313e-51	1.27906e-46	0.934	0.689
col12a1a	ENSDARG00000078322	LL0000005981	7	1.01391	1.58881e-50	3.50793e-46	0.426	0.135
ptgdsb.2	ENSDARG00000071626	LL0000022818	7	0.905777	2.28434e-48	5.04359e-44	0.663	0.32
vim	ENSDARG00000010008	LL0000031854	7	1.36896	9.88218e-48	2.18189e-43	0.479	0.171
gulp1a	ENSDARG00000001733	LL0000011878	7	0.684481	2.60507e-46	5.75174e-42	0.314	0.083
cldn11a	ENSDARG00000020031	LL0000005757	7	0.96943	1.68107e-45	3.71164e-41	0.31	0.08
tgfbi	ENSDARG00000071586	LL0000030228	7	0.752978	6.95018e-45	1.53453e-40	0.403	0.128
si:ch211-251b21.1	ENSDARG00000007275	LL0000025837	7	1.11594	1.71925e-44	3.79594e-40	0.752	0.436
colec12	ENSDARG00000061140	LL0000006035	7	0.589725	2.61706e-44	5.7782e-40	0.337	0.095
tuft1a	ENSDARG00000061242	LL0000031370	7	0.782335	3.19055e-44	7.04442e-40	0.406	0.138
nsa2	ENSDARG00000007708	LL0000020644	7	0.548001	1.40183e-43	3.09509e-39	0.954	0.78
fibinb	ENSDARG00000087196	LL0000010349	7	0.673248	3.4438e-43	7.60357e-39	0.267	0.065
zgc:158343	ENSDARG00000099411	LL0000038791	7	0.751916	3.71329e-42	8.19857e-38	0.429	0.153
s100v2	ENSDARG00000070702	LL0000024152	7	0.623473	1.08417e-41	2.39374e-37	0.548	0.232
ctsk	ENSDARG00000040251	LL0000007761	7	0.709455	1.46693e-41	3.23883e-37	0.416	0.147
vwde	ENSDARG00000103443	LL0000031954	7	1.34428	2.71457e-40	5.99349e-36	0.314	0.092
tmem176	ENSDARG00000078659	LL0000030516	7	0.517104	3.28416e-40	7.2511e-36	0.64	0.285
eef1da	ENSDARG00000102291	LL0000009400	7	0.506673	4.20916e-40	9.2934e-36	0.967	0.744
rarga	ENSDARG00000034117	LL0000023202	7	0.623482	2.60152e-39	5.74389e-35	0.347	0.111
si:ch1073-459j12.1	ENSDARG00000006901	LL0000024861	7	0.626007	2.19934e-38	4.85593e-34	0.271	0.072
CABZ01092746.1	ENSDARG00000117319	LL0000004643	7	0.722114	4.99198e-38	1.10218e-33	0.426	0.155
ms4a17a.9	ENSDARG00000094854	LL0000019626	7	0.690058	6.43462e-38	1.4207e-33	0.485	0.198
serpine1	ENSDARG00000056795	LL0000024509	7	1.17346	8.15966e-38	1.80157e-33	0.31	0.094
si:dkey-7j14.6	ENSDARG00000090552	LL0000027934	7	0.565133	4.06954e-37	8.98513e-33	0.62	0.317
hand2	ENSDARG00000008305	LL0000011925	7	0.71146	4.53794e-37	1.00193e-32	0.261	0.068
sult6b1	ENSDARG00000086826	LL0000029672	7	0.608421	7.8515e-37	1.73353e-32	0.597	0.295
fzd2	ENSDARG00000054438	LL0000011021	7	0.631568	3.5205e-35	7.77291e-31	0.35	0.12
net1	ENSDARG00000032765	LL0000020208	7	0.875933	1.3878e-34	3.06412e-30	0.452	0.199
fstl3	ENSDARG00000025670	LL0000010897	7	1.16575	3.95323e-34	8.72835e-30	0.386	0.143
junbb	ENSDARG00000104773	LL0000013046	7	0.725112	6.6126e-34	1.46e-29	0.521	0.248
pcdh18b	ENSDARG00000052494	LL0000021363	7	0.535728	4.37076e-33	9.6502e-29	0.251	0.07
ier2a	ENSDARG00000099195	LL0000012474	7	0.742945	2.07486e-32	4.58108e-28	0.759	0.515
col6a1	ENSDARG00000074908	LL0000006020	7	0.522448	4.90704e-32	1.08342e-27	0.363	0.129
wfdc2	ENSDARG00000089187	LL0000032058	7	0.727205	1.47317e-31	3.2526e-27	0.257	0.076
btg2	ENSDARG00000020298	LL0000002063	7	0.568946	6.52165e-31	1.43992e-26	0.842	0.578
mcl1a	ENSDARG00000009779	LL0000018766	7	0.624194	2.17376e-30	4.79944e-26	0.865	0.637
mych	ENSDARG00000077473	LL0000019810	7	0.611557	4.94708e-30	1.09226e-25	0.637	0.362
angptl4	ENSDARG00000035859	LL0000000987	7	0.648786	1.50393e-29	3.32053e-25	0.488	0.237
atf4b	ENSDARG00000038141	LL0000001525	7	0.504727	1.90896e-28	4.2148e-24	0.756	0.522
si:ch211-286o17.1	ENSDARG00000100446	LL0000026026	7	0.545536	7.88463e-28	1.74085e-23	0.449	0.202
ifitm1	ENSDARG00000093303	LL0000012496	7	0.7335	9.61832e-28	2.12363e-23	0.541	0.274
cbx7a	ENSDARG00000038025	LL0000005004	7	0.565749	2.38048e-27	5.25587e-23	0.518	0.256
eif4ebp3l	ENSDARG00000041607	LL0000009529	7	0.580567	1.5616e-26	3.44785e-22	0.812	0.589
jun	ENSDARG00000043531	LL0000013044	7	0.648863	2.71613e-26	5.99694e-22	0.762	0.528
si:ch1073-291c23.2	ENSDARG00000074869	LL0000024815	7	0.518262	1.51178e-25	3.33786e-21	0.389	0.169
ier2b	ENSDARG00000086881	LL0000012475	7	0.518855	6.93862e-25	1.53198e-20	0.723	0.457
cish	ENSDARG00000060316	LL0000005712	7	0.570109	7.69921e-25	1.69991e-20	0.455	0.231
krt15	ENSDARG00000036840	LL0000013458	7	1.14308	9.20593e-25	2.03258e-20	0.337	0.138
cst14a.2	ENSDARG00000045352	LL0000007467	7	0.631846	1.70091e-24	3.75545e-20	0.63	0.399
mmp14b	ENSDARG00000008388	LL0000019399	7	0.507778	1.49426e-22	3.29917e-18	0.251	0.091
col5a2a	ENSDARG00000031678	LL0000006016	7	0.55259	4.89062e-22	1.0798e-17	0.281	0.107
slc38a5b	ENSDARG00000014587	LL0000028740	7	0.52357	2.93731e-21	6.48528e-17	0.568	0.346
ctsla	ENSDARG00000007836	LL0000007763	7	0.520143	6.25812e-21	1.38173e-16	0.729	0.527
pdcd6	ENSDARG00000005220	LL0000021484	7	0.529383	1.19517e-20	2.6388e-16	0.389	0.197
klf2b	ENSDARG00000040432	LL0000013362	7	0.635763	5.5365e-20	1.2224e-15	0.251	0.098
prrx1a	ENSDARG00000033971	LL0000022700	7	0.501127	1.8821e-19	4.1555e-15	0.257	0.1
postnb	ENSDARG00000104267	LL0000022327	7	0.526458	3.74646e-19	8.27182e-15	0.327	0.144
boc	ENSDARG00000074335	LL0000001974	7	0.521058	5.26987e-19	1.16353e-14	0.35	0.17
flot1b	ENSDARG00000037998	LL0000010400	7	0.602647	6.52562e-19	1.44079e-14	0.508	0.331
thbs4b	ENSDARG00000020072	LL0000030266	7	0.60877	2.54722e-18	5.62401e-14	0.261	0.105
si:dkey-239h2.3	ENSDARG00000092033	LL0000027278	7	0.541659	1.44149e-17	3.18268e-13	0.495	0.302
jdp2b	ENSDARG00000020133	LL0000013025	7	0.531413	2.24593e-17	4.95878e-13	0.617	0.393
gas1a	ENSDARG00000077298	LL0000011147	7	0.638271	4.14976e-17	9.16225e-13	0.261	0.114
ip6k2a	ENSDARG00000008310	LL0000012814	7	0.548859	1.09908e-15	2.42667e-11	0.442	0.269
anxa2a	ENSDARG00000003216	LL0000001104	7	0.748327	2.07535e-14	4.58217e-10	0.294	0.147
egr1	ENSDARG00000037421	LL0000009456	7	0.501242	1.27006e-12	2.80417e-08	0.479	0.33
zgc:153704	ENSDARG00000045979	LL0000038744	7	0.512056	1.36377e-12	3.01107e-08	0.353	0.191
her4.2.1	ENSDARG00000056729		8	2.3976	0	0	0.878	0.062
her15.1	ENSDARG00000054562	LL0000012046	8	2.13385	0	0	0.899	0.087
her4.1	ENSDARG00000056732	LL0000012049	8	2.04555	0	0	0.72	0.06
her4.2	ENSDARG00000094426	LL0000012050	8	1.91165	0	0	0.767	0.049
her4.4	ENSDARG00000009822	LL0000012052	8	1.84433	0	0	0.74	0.06
her15.1.1	ENSDARG00000054560		8	1.75577	0	0	0.693	0.046
dla	ENSDARG00000010791	LL0000008966	8	1.73713	0	0	0.709	0.049
her2	ENSDARG00000038205	LL0000012047	8	1.38677	0	0	0.493	0.021
ascl1b.1	ENSDARG00000101628	LL0000001473	8	1.16371	0	0	0.419	0.014
sox19a	ENSDARG00000010770	LL0000029186	8	1.12971	0	0	0.547	0.034
sox3	ENSDARG00000053569	LL0000029194	8	1.34998	2.9334e-292	6.47666e-288	0.652	0.064
her12	ENSDARG00000032963	LL0000012044	8	1.24944	2.54662e-287	5.62267e-283	0.466	0.03
si:ch73-21g5.7	ENSDARG00000093156	LL0000026318	8	1.03704	3.2643e-265	7.20725e-261	0.257	0.007
si:ch211-212k18.5	ENSDARG00000103316	LL0000025548	8	0.753637	1.34576e-226	2.9713e-222	0.405	0.029
plp1a	ENSDARG00000103732	LL0000022146	8	0.664664	6.23702e-218	1.37707e-213	0.264	0.011
abhd6a	ENSDARG00000060756	LL0000000097	8	1.65788	1.14323e-200	2.52413e-196	0.284	0.015
ascl1a	ENSDARG00000038386	LL0000001472	8	1.04428	1.04531e-184	2.30794e-180	0.375	0.031
BX465834.1	ENSDARG00000095715	LL0000002752	8	1.12463	8.72694e-174	1.92682e-169	0.618	0.096
pou3f3b	ENSDARG00000095896	LL0000022337	8	0.772413	5.1046e-168	1.12704e-163	0.443	0.048
CU467822.1	ENSDARG00000101584	LL0000007981	8	1.01035	8.88666e-165	1.96209e-160	0.547	0.077
atp1b4	ENSDARG00000053262	LL0000001590	8	0.500479	5.04268e-158	1.11337e-153	0.459	0.054
zgc:165461	ENSDARG00000040162	LL0000038884	8	0.546763	8.21779e-144	1.81441e-139	0.405	0.047
CR848047.1	ENSDARG00000095906	LL0000007048	8	1.04226	1.59244e-142	3.51595e-138	0.358	0.038
notch3	ENSDARG00000052139	LL0000020486	8	0.849285	2.66711e-142	5.88871e-138	0.473	0.068
gadd45gb.1	ENSDARG00000016725	LL0000011091	8	0.927473	8.79777e-142	1.94246e-137	0.314	0.029
sb:cb81	ENSDARG00000040503	LL0000024233	8	1.07902	1.62447e-139	3.58666e-135	0.51	0.08
msi1	ENSDARG00000010710	LL0000019639	8	0.801491	3.37445e-136	7.45045e-132	0.554	0.094
notch1a	ENSDARG00000103554	LL0000020483	8	0.64452	2.43129e-132	5.36805e-128	0.321	0.033
en2b	ENSDARG00000038868	LL0000009634	8	0.659361	2.62815e-129	5.8027e-125	0.338	0.036
marcksb	ENSDARG00000008803	LL0000018674	8	1.02562	1.26907e-123	2.80198e-119	0.801	0.22
pou3f3a	ENSDARG00000042032	LL0000022336	8	0.576845	1.71311e-122	3.78237e-118	0.324	0.035
ccnd1	ENSDARG00000101637	LL0000005166	8	1.46023	1.56397e-121	3.45309e-117	0.726	0.224
lfng	ENSDARG00000037879	LL0000013610	8	1.03407	3.39276e-121	7.49088e-117	0.608	0.131
zgc:110540	ENSDARG00000054929	LL0000038518	8	1.06053	3.33306e-119	7.35906e-115	0.436	0.069
si:ch211-137a8.4	ENSDARG00000078748	LL0000025074	8	0.992262	8.00064e-118	1.76646e-113	0.703	0.175
hmga1a	ENSDARG00000028335	LL0000012165	8	1.43685	2.94289e-117	6.49761e-113	0.963	0.582
pou3f1	ENSDARG00000009823	LL0000022333	8	0.784551	8.75991e-115	1.9341e-110	0.446	0.07
mbd3b	ENSDARG00000061810	LL0000018722	8	0.908035	3.20845e-113	7.08394e-109	0.618	0.137
hmgb2b	ENSDARG00000053990	LL0000012171	8	1.38379	5.91346e-113	1.30563e-108	0.959	0.581
pclaf	ENSDARG00000097691	LL0000021431	8	0.903651	2.1662e-111	4.78275e-107	0.446	0.076
si:ch211-156b7.4	ENSDARG00000101707	LL0000025188	8	1.09713	7.12117e-111	1.57228e-106	0.645	0.172
hmgb1b	ENSDARG00000030479	LL0000012169	8	1.19047	4.08562e-110	9.02065e-106	0.956	0.449
dut	ENSDARG00000106529	LL0000009295	8	1.13397	2.37673e-109	5.24758e-105	0.541	0.118
sox11b	ENSDARG00000095743	LL0000029180	8	1.06623	6.59041e-108	1.4551e-103	0.598	0.135
hmgn2	ENSDARG00000099572	LL0000012179	8	1.58666	9.25337e-108	2.04305e-103	0.993	0.811
lig1	ENSDARG00000060041	LL0000013663	8	0.792153	2.94406e-107	6.50019e-103	0.49	0.096
dlb	ENSDARG00000004232	LL0000008968	8	0.891021	5.74296e-106	1.26799e-101	0.267	0.028
stmn1a	ENSDARG00000004169	LL0000029569	8	1.26129	2.44942e-103	5.40807e-99	0.834	0.333
hells	ENSDARG00000057738	LL0000012030	8	0.88275	2.70802e-102	5.97905e-98	0.429	0.078
si:ch211-222l21.1	ENSDARG00000076532	LL0000025644	8	1.47663	9.26921e-102	2.04655e-97	0.949	0.523
slbp	ENSDARG00000100558	LL0000028469	8	0.656627	2.45905e-100	5.42934e-96	0.358	0.054
nova2	ENSDARG00000017673	LL0000020494	8	0.800144	6.26666e-99	1.38362e-94	0.764	0.221
si:ch211-288g17.3	ENSDARG00000070959	LL0000026030	8	1.13796	2.65707e-98	5.86654e-94	0.872	0.374
cirbpa	ENSDARG00000103672	LL0000005708	8	0.998863	1.06937e-95	2.36105e-91	0.966	0.703
mycn	ENSDARG00000006837	LL0000019813	8	0.87955	4.54159e-95	1.00274e-90	0.551	0.132
asf1ba	ENSDARG00000101037	LL0000001474	8	0.606572	2.67055e-93	5.89632e-89	0.318	0.046
h2afvb	ENSDARG00000116491	LL0000011901	8	1.10997	1.35048e-86	2.98174e-82	0.922	0.545
mdka	ENSDARG00000036036	LL0000018805	8	0.974941	7.60472e-86	1.67905e-81	0.845	0.364
rrm2	ENSDARG00000020711	LL0000039875	8	1.46299	1.94604e-84	4.29666e-80	0.345	0.06
zic3	ENSDARG00000071497	LL0000039305	8	0.663193	2.25801e-83	4.98546e-79	0.375	0.068
hmgb2a	ENSDARG00000029722	LL0000012170	8	1.31715	3.25795e-81	7.19322e-77	0.963	0.701
unga	ENSDARG00000042527	LL0000031637	8	0.510147	2.4399e-80	5.38705e-76	0.287	0.043
khdrbs1a	ENSDARG00000052856	LL0000013267	8	0.84837	3.48494e-80	7.6944e-76	0.97	0.685
sinhcafl.1	ENSDARG00000078118		8	0.75481	2.60981e-79	5.7622e-75	0.581	0.16
pcna	ENSDARG00000054155	LL0000021440	8	1.34456	2.15646e-78	4.76125e-74	0.642	0.23
marcksa	ENSDARG00000004049	LL0000018673	8	0.670165	5.17568e-76	1.14274e-71	0.514	0.129
rbbp4	ENSDARG00000029058	LL0000023255	8	0.822043	4.64194e-75	1.02489e-70	0.53	0.149
tmsb	ENSDARG00000054911	LL0000030688	8	0.611098	6.24493e-74	1.37882e-69	0.493	0.121
apex1	ENSDARG00000045843	LL0000001162	8	0.667466	1.01613e-72	2.24352e-68	0.598	0.186
h3f3b.1	ENSDARG00000020504	LL0000039823	8	1.09986	2.64863e-72	5.8479e-68	0.926	0.613
rpa3	ENSDARG00000002613	LL0000023876	8	0.779803	4.6013e-72	1.01592e-67	0.51	0.145
hnrnpa0b	ENSDARG00000036162	LL0000012204	8	0.864069	6.76733e-72	1.49416e-67	0.922	0.546
seta	ENSDARG00000031495	LL0000024527	8	0.978271	1.19534e-71	2.63918e-67	0.848	0.458
fabp7a	ENSDARG00000007697	LL0000009941	8	1.00929	5.60917e-70	1.23845e-65	0.784	0.351
lbr	ENSDARG00000014013	LL0000013553	8	0.823023	6.21421e-70	1.37204e-65	0.514	0.144
cdca7a	ENSDARG00000077620	LL0000005307	8	0.838295	3.24189e-69	7.15777e-65	0.399	0.093
hes6	ENSDARG00000019335	LL0000012068	8	0.664154	3.70173e-69	8.17305e-65	0.402	0.089
hnrnpabb	ENSDARG00000099865	LL0000012210	8	0.848483	1.40486e-68	3.1018e-64	0.882	0.502
nasp	ENSDARG00000039208	LL0000019993	8	0.614434	4.6952e-68	1.03665e-63	0.405	0.097
cks1b	ENSDARG00000007971	LL0000005732	8	0.566638	1.10782e-67	2.44596e-63	0.331	0.065
h2afx	ENSDARG00000029406	LL0000011902	8	0.716662	3.94638e-66	8.71321e-62	0.416	0.102
tubb2b	ENSDARG00000098591	LL0000031358	8	1.09365	4.88533e-65	1.07863e-60	0.787	0.387
rrm1	ENSDARG00000014017	LL0000024032	8	0.586383	9.74492e-65	2.15158e-60	0.338	0.071
chaf1a	ENSDARG00000062152	LL0000005556	8	0.617417	1.1678e-64	2.57838e-60	0.368	0.085
parp1	ENSDARG00000019529	LL0000021292	8	0.565659	2.47445e-64	5.46333e-60	0.392	0.095
tgif1	ENSDARG00000059337	LL0000030235	8	0.700535	6.50238e-64	1.43566e-59	0.527	0.161
setb	ENSDARG00000003920	LL0000024528	8	0.786894	5.00168e-63	1.10432e-58	0.868	0.515
snrpd1	ENSDARG00000011648	LL0000029078	8	0.785026	6.05981e-63	1.33794e-58	0.73	0.328
ptmab	ENSDARG00000101766	LL0000022860	8	0.820154	1.30737e-62	2.88654e-58	1	0.86
rfc4	ENSDARG00000042458	LL0000023563	8	0.50599	2.7069e-62	5.97656e-58	0.402	0.101
si:ch73-281n10.2	ENSDARG00000097102	LL0000026414	8	0.858472	8.38045e-62	1.85032e-57	0.959	0.76
snrpb	ENSDARG00000011125	LL0000029075	8	0.739183	5.86637e-61	1.29524e-56	0.831	0.44
ran	ENSDARG00000057026	LL0000023166	8	0.610258	2.12696e-60	4.69611e-56	0.973	0.769
tuba1a	ENSDARG00000001889	LL0000031346	8	0.628477	2.68443e-60	5.92695e-56	0.622	0.204
h2afva	ENSDARG00000068820	LL0000011900	8	0.679914	7.27044e-60	1.60524e-55	0.743	0.321
snrpe	ENSDARG00000033175	LL0000029082	8	0.78469	7.27439e-60	1.60611e-55	0.74	0.355
hmgn6	ENSDARG00000087636	LL0000012181	8	0.667099	3.65433e-59	8.06839e-55	0.976	0.701
hmgb1a	ENSDARG00000099175	LL0000012168	8	0.970213	4.62062e-59	1.02019e-54	0.868	0.514
uck2b	ENSDARG00000022213	LL0000031547	8	0.516695	3.1994e-58	7.06395e-54	0.399	0.103
sox11a	ENSDARG00000077811	LL0000029179	8	0.744354	4.7103e-58	1.03999e-53	0.53	0.17
prim2	ENSDARG00000052721	LL0000022563	8	0.505137	8.07053e-58	1.78189e-53	0.321	0.071
asf1bb	ENSDARG00000043713	LL0000001475	8	0.528294	1.61038e-57	3.55555e-53	0.392	0.1
sumo3b	ENSDARG00000035993	LL0000029679	8	0.793073	6.50642e-57	1.43655e-52	0.662	0.282
fsta	ENSDARG00000052846	LL0000010893	8	0.629477	4.72653e-56	1.04357e-51	0.301	0.063
snrpg	ENSDARG00000099667	LL0000029084	8	0.712922	2.83249e-55	6.25385e-51	0.679	0.3
tfdp2	ENSDARG00000042835	LL0000030207	8	0.630703	3.74103e-55	8.25983e-51	0.318	0.073
hmgb3a	ENSDARG00000056725	LL0000012172	8	0.622133	6.70281e-55	1.47991e-50	0.875	0.437
syncrip	ENSDARG00000040184	LL0000029743	8	0.662157	7.6297e-55	1.68456e-50	0.845	0.47
rpa1	ENSDARG00000003938	LL0000023874	8	0.546369	1.69435e-54	3.74097e-50	0.402	0.111
hnrnpaba	ENSDARG00000007960	LL0000012209	8	0.626024	4.51248e-54	9.9631e-50	0.966	0.742
rrm2.1	ENSDARG00000078069	LL0000040133	8	1.12311	5.52707e-52	1.22032e-47	0.277	0.059
cbx2	ENSDARG00000044938	LL0000004997	8	0.561336	6.20139e-52	1.3692e-47	0.368	0.098
hnrnpa0a	ENSDARG00000089302	LL0000012203	8	0.562897	1.1883e-51	2.62365e-47	0.686	0.278
hdac1	ENSDARG00000015427	LL0000011987	8	0.639754	1.40964e-51	3.11235e-47	0.733	0.344
cirbpb	ENSDARG00000013351	LL0000005709	8	0.60773	6.54327e-51	1.44469e-46	0.993	0.856
rpa2	ENSDARG00000037188	LL0000023875	8	0.605901	8.74932e-50	1.93176e-45	0.416	0.126
hp1bp3	ENSDARG00000044669	LL0000012290	8	0.512628	1.28562e-49	2.83852e-45	0.757	0.346
gas1b	ENSDARG00000067984	LL0000011148	8	0.529732	2.61275e-49	5.76869e-45	0.314	0.076
anp32b	ENSDARG00000023330	LL0000001085	8	0.704231	1.59474e-48	3.52102e-44	0.693	0.334
nucks1a	ENSDARG00000078473	LL0000020711	8	0.586156	5.96929e-48	1.31796e-43	0.757	0.364
mcm3	ENSDARG00000024204	LL0000018770	8	0.589581	8.58012e-48	1.8944e-43	0.355	0.098
ilf2	ENSDARG00000014591	LL0000012693	8	0.604514	1.09392e-47	2.41527e-43	0.625	0.262
smarce1	ENSDARG00000016871	LL0000028959	8	0.549357	1.18639e-47	2.61943e-43	0.713	0.325
ewsr1b	ENSDARG00000020465	LL0000039796	8	0.580586	8.04056e-47	1.77528e-42	0.622	0.272
smc1al	ENSDARG00000058203	LL0000028961	8	0.590198	8.99146e-47	1.98522e-42	0.578	0.232
smarcd1	ENSDARG00000019004	LL0000028955	8	0.518617	9.77023e-47	2.15717e-42	0.446	0.144
rbm4.3	ENSDARG00000022129	LL0000023298	8	0.67015	9.87895e-47	2.18117e-42	0.804	0.452
snrpd3l	ENSDARG00000076283	LL0000029081	8	0.582051	1.95177e-46	4.30932e-42	0.618	0.264
fabp3	ENSDARG00000023290	LL0000009939	8	0.515087	3.10572e-46	6.85712e-42	0.872	0.533
si:ch73-1a9.3	ENSDARG00000103919	LL0000026297	8	0.605675	1.45568e-45	3.21401e-41	0.99	0.862
ddx39ab	ENSDARG00000015111	LL0000008782	8	0.622482	3.92509e-45	8.66622e-41	0.605	0.266
h3f3b.1.1	ENSDARG00000068436	LL0000040151	8	0.585644	5.36181e-45	1.18384e-40	0.875	0.55
si:dkey-56m19.5	ENSDARG00000068432	LL0000027754	8	0.600945	6.92162e-45	1.52822e-40	0.503	0.174
cbx3a	ENSDARG00000003860	LL0000004998	8	0.594286	1.18994e-44	2.62728e-40	0.723	0.374
banf1	ENSDARG00000037009	LL0000001790	8	0.790222	2.95247e-44	6.51877e-40	0.591	0.281
rtca	ENSDARG00000002215	LL0000024069	8	0.591029	3.90187e-44	8.61494e-40	0.294	0.074
snrpf	ENSDARG00000105037	LL0000029083	8	0.62536	1.14561e-43	2.5294e-39	0.669	0.337
rad21a	ENSDARG00000006092	LL0000023123	8	0.669419	5.55614e-43	1.22674e-38	0.645	0.31
insm1a	ENSDARG00000091756	LL0000012790	8	0.781995	7.53756e-43	1.66422e-38	0.274	0.065
mex3b	ENSDARG00000058369	LL0000018918	8	0.525238	9.93891e-43	2.19441e-38	0.399	0.121
sumo3a	ENSDARG00000028119	LL0000029678	8	0.638412	1.64706e-42	3.63654e-38	0.811	0.501
srsf2a	ENSDARG00000057484	LL0000029401	8	0.563657	1.67736e-42	3.70345e-38	0.706	0.366
mcm4	ENSDARG00000040041	LL0000018773	8	0.64541	4.99236e-42	1.10226e-37	0.385	0.127
mcm6	ENSDARG00000057683	LL0000018775	8	0.598079	5.99992e-42	1.32472e-37	0.365	0.114
lrrn1	ENSDARG00000060115	LL0000018410	8	0.61043	5.90851e-41	1.30454e-36	0.264	0.063
sub1a	ENSDARG00000053446	LL0000029641	8	0.612152	1.59558e-40	3.52287e-36	0.713	0.391
elavl3	ENSDARG00000014420	LL0000009552	8	0.837848	1.97979e-40	4.37117e-36	0.419	0.139
si:dkey-42i9.4	ENSDARG00000008049	LL0000027656	8	0.621047	2.84916e-40	6.29066e-36	0.706	0.365
mibp	ENSDARG00000101362	LL0000019006	8	0.5831	4.8921e-40	1.08013e-35	0.399	0.129
si:ch211-51e12.7	ENSDARG00000045914	LL0000026057	8	0.534956	7.032e-40	1.5526e-35	0.635	0.295
adssl	ENSDARG00000012399	LL0000000426	8	0.517243	1.27386e-39	2.81255e-35	0.392	0.135
snrpd2	ENSDARG00000040440	LL0000029079	8	0.538638	1.5566e-39	3.43681e-35	0.676	0.34
fen1	ENSDARG00000011404	LL0000010254	8	0.528428	6.91583e-39	1.52695e-34	0.314	0.092
anp32a	ENSDARG00000006487	LL0000001084	8	0.531096	1.16851e-38	2.57996e-34	0.845	0.558
cct3	ENSDARG00000016173	LL0000005211	8	0.509762	4.88614e-38	1.07881e-33	0.706	0.381
khsrp	ENSDARG00000026489	LL0000013273	8	0.529013	7.06885e-38	1.56073e-33	0.564	0.257
lsm7	ENSDARG00000058328	LL0000018437	8	0.529694	1.6645e-37	3.67506e-33	0.682	0.347
hnrnpa0l.1	ENSDARG00000036161	LL0000039827	8	0.535927	1.75873e-37	3.88311e-33	0.973	0.765
ppm1g	ENSDARG00000075559	LL0000022399	8	0.534562	4.07722e-37	9.00209e-33	0.416	0.151
rcc2	ENSDARG00000011510	LL0000023346	8	0.511039	2.34187e-36	5.17062e-32	0.483	0.19
cdkn1ca	ENSDARG00000010878	LL0000005381	8	0.679814	1.65601e-35	3.65631e-31	0.27	0.074
mcm5	ENSDARG00000019507	LL0000018774	8	0.577615	6.57772e-35	1.4523e-30	0.314	0.099
cbx5	ENSDARG00000061187	LL0000005001	8	0.542296	6.28074e-34	1.38672e-29	0.666	0.362
tubb4b	ENSDARG00000002344	LL0000031359	8	0.500188	1.45426e-33	3.21086e-29	0.953	0.755
selenoh	ENSDARG00000093022	LL0000024398	8	0.604286	6.55787e-32	1.44791e-27	0.666	0.386
tuba8l4	ENSDARG00000006260	LL0000031355	8	0.695251	1.17795e-28	2.60079e-24	0.696	0.463
ctnnb1	ENSDARG00000014571	LL0000007740	8	0.504109	2.03602e-28	4.49534e-24	0.639	0.37
nutf2l	ENSDARG00000014499	LL0000020773	8	0.522299	7.41018e-27	1.63609e-22	0.466	0.229
tp53inp2	ENSDARG00000088178	LL0000030852	8	0.555147	6.07653e-26	1.34164e-21	0.301	0.107
id1	ENSDARG00000040764	LL0000012459	8	0.580393	1.49274e-24	3.29583e-20	0.706	0.443
rbp5	ENSDARG00000101481	LL0000023323	8	0.62172	1.72976e-18	3.81914e-14	0.334	0.155
otos	ENSDARG00000108475	LL0000021122	9	3.45249	0	0	0.692	0.028
col2a1a	ENSDARG00000069093	LL0000006005	9	3.37192	0	0	0.932	0.076
matn4	ENSDARG00000015947	LL0000018709	9	3.18952	0	0	0.956	0.081
col9a3	ENSDARG00000037845	LL0000006032	9	2.79597	0	0	0.936	0.047
col9a1a	ENSDARG00000073699	LL0000006029	9	2.7	0	0	0.983	0.057
cnmd	ENSDARG00000100133	LL0000005897	9	2.6163	0	0	0.936	0.098
col9a2	ENSDARG00000024492	LL0000006031	9	2.45573	0	0	0.946	0.055
col11a1a	ENSDARG00000026165	LL0000005978	9	2.15646	0	0	0.844	0.098
cthrc1a	ENSDARG00000087198	LL0000007734	9	1.78818	0	0	0.641	0.035
epyc	ENSDARG00000056950	LL0000009747	9	1.71744	0	0	0.512	0.023
col11a2	ENSDARG00000012422	LL0000005980	9	1.51919	0	0	0.546	0.023
ucmab	ENSDARG00000005485	LL0000031551	9	1.51473	4.03677e-301	8.91278e-297	0.539	0.039
fibina	ENSDARG00000039949	LL0000010348	9	1.55561	2.39146e-278	5.2801e-274	0.678	0.075
tgfbi	ENSDARG00000071586	LL0000030228	9	1.79885	1.17713e-275	2.59898e-271	0.8	0.116
col2a1b	ENSDARG00000011407	LL0000006006	9	1.84853	8.20331e-265	1.81121e-260	0.892	0.163
cpxm1a	ENSDARG00000073716	LL0000006179	9	0.931565	7.40197e-264	1.63428e-259	0.403	0.024
col11a1b	ENSDARG00000009014	LL0000005979	9	1.26358	4.66207e-253	1.02934e-248	0.708	0.09
cdh11	ENSDARG00000021442	LL0000005316	9	1.17314	1.03725e-180	2.29014e-176	0.712	0.124
mmp2	ENSDARG00000017676	LL0000019407	9	1.3437	3.06968e-162	6.77755e-158	0.82	0.204
angptl5	ENSDARG00000056630	LL0000000988	9	0.792163	1.20943e-147	2.6703e-143	0.437	0.055
tnn	ENSDARG00000024829	LL0000030756	9	1.51508	3.3809e-144	7.4647e-140	0.458	0.062
twist1a	ENSDARG00000030402	LL0000031388	9	1.15515	2.60203e-142	5.74501e-138	0.631	0.124
tnmd	ENSDARG00000052615	LL0000030755	9	1.81548	6.43141e-138	1.41999e-133	0.397	0.05
foxc1a	ENSDARG00000091481	LL0000010578	9	0.796974	4.82205e-132	1.06466e-127	0.383	0.047
tnc	ENSDARG00000021948	LL0000030712	9	0.892334	4.57557e-130	1.01024e-125	0.366	0.044
col5a1	ENSDARG00000012593	LL0000006015	9	1.15941	9.77548e-130	2.15833e-125	0.831	0.241
pdgfrl	ENSDARG00000006456	LL0000021526	9	0.826465	2.94565e-113	6.5037e-109	0.464	0.078
sparc	ENSDARG00000019353	LL0000029233	9	1.25341	5.85075e-111	1.29179e-106	0.956	0.434
foxc1b	ENSDARG00000055398	LL0000010579	9	0.740072	3.68411e-110	8.13415e-106	0.4	0.06
si:ch1073-459j12.1	ENSDARG00000006901	LL0000024861	9	0.776547	3.66508e-109	8.09212e-105	0.42	0.067
six2a	ENSDARG00000058004	LL0000028438	9	0.849564	2.88612e-102	6.37226e-98	0.325	0.044
angptl1a	ENSDARG00000012071	LL0000000982	9	0.705907	2.42067e-98	5.34461e-94	0.492	0.097
srpx	ENSDARG00000010318	LL0000029390	9	0.607227	1.46966e-94	3.24485e-90	0.275	0.033
timp2a	ENSDARG00000061226	LL0000030331	9	0.839333	5.32435e-94	1.17556e-89	0.637	0.17
foxp4	ENSDARG00000076120	LL0000010626	9	1.03536	2.75109e-93	6.07412e-89	0.834	0.325
cyr61	ENSDARG00000023062	LL0000008623	9	1.28931	1.65719e-92	3.65892e-88	0.773	0.277
ctgfa	ENSDARG00000042934	LL0000007729	9	1.32799	2.91552e-92	6.43717e-88	0.586	0.151
wfdc2	ENSDARG00000089187	LL0000032058	9	1.02595	1.11392e-90	2.45942e-86	0.397	0.072
lum	ENSDARG00000045580	LL0000018456	9	1.02313	2.45222e-90	5.41426e-86	0.437	0.085
fstl3	ENSDARG00000025670	LL0000010897	9	1.67061	1.51705e-85	3.3495e-81	0.546	0.138
fli1a	ENSDARG00000054632	LL0000010389	9	0.577366	4.76725e-84	1.05256e-79	0.336	0.054
fgfrl1b	ENSDARG00000052556	LL0000010323	9	0.511082	3.90433e-83	8.62036e-79	0.275	0.038
fmoda	ENSDARG00000044895	LL0000010422	9	1.36428	2.79304e-82	6.16675e-78	0.597	0.171
eya1	ENSDARG00000014259	LL0000009895	9	0.574123	2.0722e-81	4.57521e-77	0.346	0.06
mmp14a	ENSDARG00000002235	LL0000019398	9	0.652667	1.55658e-80	3.43677e-76	0.454	0.1
tfpia	ENSDARG00000034718	LL0000030215	9	0.859053	2.88855e-80	6.37763e-76	0.369	0.07
zgc:153704	ENSDARG00000045979	LL0000038744	9	1.21601	2.98261e-75	6.58531e-71	0.593	0.183
socs3b	ENSDARG00000026611	LL0000029137	9	0.820826	4.44757e-74	9.81978e-70	0.722	0.264
ntd5	ENSDARG00000040944	LL0000020680	9	0.824558	1.26601e-72	2.79523e-68	0.593	0.177
olfml3b	ENSDARG00000062171	LL0000020871	9	0.587578	1.96689e-72	4.34269e-68	0.427	0.096
prrx1a	ENSDARG00000033971	LL0000022700	9	0.631049	1.04828e-70	2.31451e-66	0.42	0.095
socs3a	ENSDARG00000025428	LL0000029136	9	0.837617	5.97282e-70	1.31874e-65	0.942	0.503
selenop	ENSDARG00000093549	LL0000024463	9	0.882187	1.52098e-68	3.35816e-64	0.881	0.469
mfap2	ENSDARG00000059367	LL0000018921	9	0.705915	7.919e-68	1.74844e-63	0.685	0.236
cyp26b1	ENSDARG00000077121	LL0000008556	9	0.735282	4.99042e-66	1.10183e-61	0.407	0.095
mycb	ENSDARG00000007241	LL0000019806	9	0.909278	2.1727e-65	4.7971e-61	0.668	0.255
colec12	ENSDARG00000061140	LL0000006035	9	0.572073	2.23801e-65	4.94129e-61	0.403	0.094
pmp22a	ENSDARG00000105223	LL0000022201	9	0.604177	4.3016e-64	9.4975e-60	0.946	0.425
si:ch211-251b21.1	ENSDARG00000007275	LL0000025837	9	0.862821	1.45824e-62	3.21964e-58	0.844	0.434
fosab	ENSDARG00000031683	LL0000010566	9	0.699911	1.43674e-60	3.17218e-56	0.99	0.722
ogna	ENSDARG00000044132	LL0000020833	9	0.956521	2.40916e-59	5.31918e-55	0.42	0.109
zgc:162730	ENSDARG00000103720	LL0000038847	9	0.841204	1.43474e-58	3.16776e-54	0.932	0.567
mych	ENSDARG00000077473	LL0000019810	9	0.832863	1.66104e-58	3.66742e-54	0.753	0.359
dcn	ENSDARG00000012066	LL0000008724	9	0.595272	1.55947e-55	3.44315e-51	0.461	0.132
fgfbp2b	ENSDARG00000038056	LL0000010313	9	0.642995	9.48282e-54	2.09371e-49	0.281	0.056
ier2a	ENSDARG00000099195	LL0000012474	9	0.786667	1.26681e-53	2.797e-49	0.858	0.512
bhmt	ENSDARG00000013430	LL0000001893	9	0.772434	1.23075e-52	2.71738e-48	0.841	0.433
junba	ENSDARG00000074378	LL0000013045	9	0.686962	3.78521e-52	8.35737e-48	0.929	0.567
igf2b	ENSDARG00000033307	LL0000012531	9	0.730021	9.04193e-52	1.99637e-47	0.417	0.12
tmem176	ENSDARG00000078659	LL0000030516	9	0.53017	4.46534e-51	9.85903e-47	0.715	0.283
btg2	ENSDARG00000020298	LL0000002063	9	0.70967	1.42502e-50	3.14631e-46	0.925	0.576
zgc:158343	ENSDARG00000099411	LL0000038791	9	0.936369	4.34192e-50	9.58652e-46	0.461	0.152
pcdh18b	ENSDARG00000052494	LL0000021363	9	0.570917	1.67792e-48	3.70467e-44	0.298	0.069
si:ch211-286o17.1	ENSDARG00000100446	LL0000026026	9	0.713014	1.0785e-46	2.38121e-42	0.539	0.199
si:dkey-239h2.3	ENSDARG00000092033	LL0000027278	9	0.585255	1.93158e-44	4.26473e-40	0.671	0.296
si:dkey-12l12.1	ENSDARG00000094422	LL0000026730	9	0.528759	1.86758e-42	4.12343e-38	0.397	0.119
sdc4	ENSDARG00000059906	LL0000024337	9	0.618657	6.54024e-41	1.44402e-36	0.868	0.529
cpn1.1	ENSDARG00000005185		9	0.504202	7.63852e-39	1.68651e-34	0.332	0.096
metrnla	ENSDARG00000101914	LL0000018892	9	0.631316	7.39827e-38	1.63346e-33	0.441	0.161
gadd45bb	ENSDARG00000013576	LL0000011089	9	0.567048	1.66505e-37	3.67627e-33	0.424	0.151
mmp14b	ENSDARG00000008388	LL0000019399	9	0.502909	1.28265e-36	2.83197e-32	0.308	0.089
mxra8b	ENSDARG00000062129	LL0000019789	9	0.514437	7.84965e-35	1.73312e-30	0.444	0.163
cdon	ENSDARG00000061328	LL0000005392	9	0.520545	1.4752e-34	3.25709e-30	0.315	0.096
fxyd1	ENSDARG00000099014	LL0000011010	9	0.600181	2.93029e-34	6.46978e-30	0.458	0.183
eif4ebp3	ENSDARG00000054916	LL0000009528	9	0.542667	6.29421e-34	1.3897e-29	0.732	0.414
cldn11a	ENSDARG00000020031	LL0000005757	9	0.503645	1.33925e-32	2.95693e-28	0.285	0.081
thbs1b	ENSDARG00000010785	LL0000030260	9	0.802689	1.88607e-32	4.16425e-28	0.285	0.085
hapln1a	ENSDARG00000089769	LL0000011928	9	0.518167	3.68741e-30	8.14142e-26	0.285	0.087
egr1	ENSDARG00000037421	LL0000009456	9	0.55029	7.63897e-29	1.68661e-24	0.624	0.325
gadd45ab	ENSDARG00000104571	LL0000011087	9	0.5058	5.09134e-27	1.12412e-22	0.356	0.14
klf2a	ENSDARG00000042667	LL0000013361	9	0.711428	5.78632e-27	1.27756e-22	0.359	0.139
id1	ENSDARG00000040764	LL0000012459	9	0.724841	1.75626e-25	3.87764e-21	0.712	0.443
lxn	ENSDARG00000043102	LL0000018460	9	0.532908	7.45865e-24	1.6468e-19	0.6	0.333
klf2b	ENSDARG00000040432	LL0000013362	9	0.510602	1.88149e-22	4.15415e-18	0.268	0.098
marcksl1a	ENSDARG00000039034	LL0000018675	9	0.574778	6.07941e-16	1.34227e-11	0.634	0.396
slco2b1	ENSDARG00000054609	LL0000028900	10	1.00985	5.7531e-108	1.27023e-103	0.431	0.069
serpinf1	ENSDARG00000069048	LL0000024512	10	1.12581	5.47055e-105	1.20784e-100	0.517	0.101
col1a1b	ENSDARG00000035809	LL0000005995	10	1.26795	3.04583e-104	6.7249e-100	0.828	0.258
pmp22a	ENSDARG00000105223	LL0000022201	10	1.01258	1.08231e-95	2.38963e-91	0.966	0.426
si:ch211-251b21.1	ENSDARG00000007275	LL0000025837	10	1.30666	1.83079e-92	4.04219e-88	0.914	0.433
ccl25b	ENSDARG00000070873	LL0000005126	10	2.12233	5.10037e-92	1.12611e-87	0.517	0.12
col1a2	ENSDARG00000020007	LL0000005996	10	1.19405	1.43903e-90	3.17723e-86	0.843	0.308
postnb	ENSDARG00000104267	LL0000022327	10	1.48475	5.74537e-89	1.26852e-84	0.558	0.138
tnn	ENSDARG00000024829	LL0000030756	10	1.64555	1.68386e-82	3.71778e-78	0.371	0.066
rbp4	ENSDARG00000101199	LL0000023321	10	0.993251	6.95992e-78	1.53668e-73	0.966	0.549
cyr61	ENSDARG00000023062	LL0000008623	10	1.17591	3.28355e-74	7.24974e-70	0.745	0.279
cldn11a	ENSDARG00000020031	LL0000005757	10	1.16982	3.70392e-74	8.17788e-70	0.393	0.079
ca6	ENSDARG00000056499	LL0000003952	10	1.27544	1.18966e-69	2.62665e-65	0.326	0.06
zgc:153704	ENSDARG00000045979	LL0000038744	10	1.23799	1.2038e-69	2.65786e-65	0.603	0.184
col5a1	ENSDARG00000012593	LL0000006015	10	1.06638	2.17954e-69	4.81221e-65	0.704	0.247
cyp2ad3	ENSDARG00000022650	LL0000008574	10	0.979493	1.23075e-65	2.71736e-61	0.779	0.339
col1a1a	ENSDARG00000012405	LL0000005994	10	0.684271	1.20656e-62	2.66397e-58	0.775	0.311
pcolcea	ENSDARG00000056913	LL0000021449	10	0.740531	1.06484e-60	2.35107e-56	0.326	0.064
jun	ENSDARG00000043531	LL0000013044	10	0.91845	5.15417e-60	1.13799e-55	0.903	0.524
col5a2a	ENSDARG00000031678	LL0000006016	10	0.682365	2.56513e-59	5.66354e-55	0.423	0.104
fstb	ENSDARG00000057992	LL0000010894	10	0.772329	2.28975e-58	5.05555e-54	0.378	0.088
col12a1a	ENSDARG00000078322	LL0000005981	10	1.10501	3.0956e-58	6.83478e-54	0.472	0.135
cebpd	ENSDARG00000087303	LL0000005408	10	0.788691	3.2467e-58	7.1684e-54	0.97	0.625
fosab	ENSDARG00000031683	LL0000010566	10	0.810222	8.36187e-58	1.84622e-53	0.989	0.723
myoc	ENSDARG00000021789	LL0000019901	10	0.851546	1.11461e-56	2.46094e-52	0.277	0.051
si:ch1073-291c23.2	ENSDARG00000074869	LL0000024815	10	0.727035	1.39566e-56	3.08149e-52	0.528	0.166
ntd5	ENSDARG00000040944	LL0000020680	10	0.96528	1.39766e-55	3.08589e-51	0.554	0.18
mfap2	ENSDARG00000059367	LL0000018921	10	0.737903	2.46205e-55	5.43596e-51	0.655	0.239
ier2a	ENSDARG00000099195	LL0000012474	10	0.901075	5.2004e-55	1.1482e-50	0.888	0.512
ms4a17a.9	ENSDARG00000094854	LL0000019626	10	0.82674	5.48083e-54	1.21011e-49	0.566	0.197
ndnf	ENSDARG00000062936	LL0000020091	10	0.973361	5.73042e-52	1.26522e-47	0.427	0.123
tnmd	ENSDARG00000052615	LL0000030755	10	1.04562	1.24003e-51	2.73785e-47	0.277	0.054
tmem176	ENSDARG00000078659	LL0000030516	10	0.716751	3.54417e-51	7.82517e-47	0.697	0.285
si:ch211-286o17.1	ENSDARG00000100446	LL0000026026	10	0.79721	1.22902e-50	2.71356e-46	0.558	0.2
dcn	ENSDARG00000012066	LL0000008724	10	0.703916	3.59664e-50	7.94102e-46	0.453	0.133
sparc	ENSDARG00000019353	LL0000029233	10	0.595519	2.99245e-49	6.60703e-45	0.873	0.438
plpp3	ENSDARG00000059933	LL0000022153	10	0.774782	5.68726e-48	1.25569e-43	0.596	0.231
timp4.3	ENSDARG00000100795	LL0000030335	10	0.706589	6.80304e-46	1.50204e-41	0.408	0.118
socs3a	ENSDARG00000025428	LL0000029136	10	0.854164	1.09045e-45	2.40759e-41	0.858	0.507
tgfbi	ENSDARG00000071586	LL0000030228	10	1.23526	1.22353e-45	2.70142e-41	0.416	0.129
junba	ENSDARG00000074378	LL0000013045	10	0.727224	2.69314e-45	5.94618e-41	0.888	0.569
igf2b	ENSDARG00000033307	LL0000012531	10	0.633639	3.62946e-45	8.01349e-41	0.412	0.121
lxn	ENSDARG00000043102	LL0000018460	10	0.678978	1.21858e-43	2.69051e-39	0.712	0.331
hgd	ENSDARG00000058005	LL0000012078	10	0.553097	2.69353e-42	5.94705e-38	0.629	0.253
eif4ebp3l	ENSDARG00000041607	LL0000009529	10	0.699956	5.90337e-42	1.30341e-37	0.888	0.588
zgc:162730	ENSDARG00000103720	LL0000038847	10	0.668631	1.7354e-41	3.83159e-37	0.929	0.568
boc	ENSDARG00000074335	LL0000001974	10	0.645121	8.60098e-41	1.89901e-36	0.476	0.167
twist1b	ENSDARG00000076010	LL0000031389	10	0.544354	1.07645e-39	2.37668e-35	0.285	0.07
ednraa	ENSDARG00000011876	LL0000009385	10	0.500866	1.266e-39	2.79519e-35	0.281	0.067
tfpia	ENSDARG00000034718	LL0000030215	10	0.565564	1.34927e-39	2.97905e-35	0.292	0.073
vwde	ENSDARG00000103443	LL0000031954	10	1.05868	7.22347e-39	1.59487e-34	0.33	0.093
agtr2	ENSDARG00000035552	LL0000000484	10	0.530605	7.51561e-39	1.65937e-34	0.258	0.06
lpl	ENSDARG00000087697	LL0000018300	10	0.81141	5.19255e-37	1.14646e-32	0.524	0.212
zfp36l2	ENSDARG00000021806	LL0000038418	10	0.618952	9.54271e-37	2.10694e-32	0.472	0.18
tmem119b	ENSDARG00000068036	LL0000030458	10	0.551103	9.27534e-36	2.0479e-31	0.27	0.069
cd81a	ENSDARG00000036080	LL0000005254	10	0.504094	3.36912e-35	7.43869e-31	0.899	0.555
aoc2	ENSDARG00000014646	LL0000001113	10	0.517513	7.47601e-35	1.65063e-30	0.543	0.227
bhmt	ENSDARG00000013430	LL0000001893	10	0.537667	1.22479e-34	2.70422e-30	0.805	0.435
rhag	ENSDARG00000019253	LL0000023629	10	1.07257	3.07946e-34	6.79914e-30	0.345	0.11
cdh11	ENSDARG00000021442	LL0000005316	10	0.693215	5.49153e-34	1.21248e-29	0.401	0.135
sdc4	ENSDARG00000059906	LL0000024337	10	0.5224	5.57834e-33	1.23164e-28	0.873	0.53
si:ch1073-459j12.1	ENSDARG00000006901	LL0000024861	10	0.545231	2.13473e-32	4.71327e-28	0.27	0.072
nid1a	ENSDARG00000068710	LL0000020304	10	0.6636	2.59543e-32	5.73044e-28	0.363	0.12
btg2	ENSDARG00000020298	LL0000002063	10	0.558726	2.67742e-32	5.91148e-28	0.888	0.578
col11a1b	ENSDARG00000009014	LL0000005979	10	0.679398	2.05198e-31	4.53058e-27	0.326	0.103
selenop	ENSDARG00000093549	LL0000024463	10	0.518602	4.63866e-31	1.02417e-26	0.794	0.473
jdp2b	ENSDARG00000020133	LL0000013025	10	0.766936	1.43428e-30	3.16675e-26	0.708	0.391
loxl2b	ENSDARG00000044074	LL0000018278	10	0.543211	3.53057e-30	7.79515e-26	0.326	0.106
cyp3c1	ENSDARG00000015575	LL0000008606	10	0.541305	1.61947e-29	3.57563e-25	0.521	0.238
angptl4	ENSDARG00000035859	LL0000000987	10	0.597542	5.85276e-29	1.29223e-24	0.517	0.237
mych	ENSDARG00000077473	LL0000019810	10	0.677325	1.01149e-28	2.23327e-24	0.652	0.363
wnt11r	ENSDARG00000014796	LL0000032086	10	0.731769	2.27462e-28	5.02213e-24	0.315	0.103
socs3b	ENSDARG00000026611	LL0000029137	10	0.532133	9.62167e-27	2.12437e-22	0.562	0.27
twist1a	ENSDARG00000030402	LL0000031388	10	0.702128	1.09831e-26	2.42495e-22	0.356	0.133
fstl1b	ENSDARG00000039576	LL0000010896	10	0.51167	6.12669e-24	1.35271e-19	0.539	0.26
sesn1	ENSDARG00000020693	LL0000024523	10	0.535224	6.45648e-24	1.42553e-19	0.745	0.504
fmoda	ENSDARG00000044895	LL0000010422	10	0.570121	5.33426e-23	1.17775e-18	0.408	0.177
slc38a5b	ENSDARG00000014587	LL0000028740	10	0.51425	1.23678e-22	2.73069e-18	0.614	0.346
timp2a	ENSDARG00000061226	LL0000030331	10	0.520886	2.79943e-22	6.18087e-18	0.408	0.178
npm1a	ENSDARG00000014329	LL0000020532	10	0.518894	6.90107e-21	1.52369e-16	0.685	0.46
col2a1b	ENSDARG00000011407	LL0000006006	10	0.68319	1.06032e-20	2.34107e-16	0.393	0.18
egr1	ENSDARG00000037421	LL0000009456	10	0.510113	4.20294e-19	9.27967e-15	0.577	0.327
angptl1a	ENSDARG00000012071	LL0000000982	10	0.581304	2.88725e-18	6.37475e-14	0.27	0.105
lpin1	ENSDARG00000020239	LL0000018298	10	0.526682	7.12422e-18	1.57296e-13	0.629	0.399
thbs4b	ENSDARG00000020072	LL0000030266	10	0.791263	8.62141e-18	1.90352e-13	0.266	0.105
slc7a8a	ENSDARG00000075831	LL0000028868	10	0.537552	1.37902e-16	3.04473e-12	0.337	0.16
cxcl12a	ENSDARG00000037116	LL0000008486	10	0.814473	4.47219e-12	9.87415e-08	0.322	0.165
crip1	ENSDARG00000053858	LL0000007317	10	0.561884	1.3447e-06	0.0296896	0.386	0.276
CABZ01074130.1	ENSDARG00000105274	LL0000004419	11	4.36727	0	0	0.95	0.046
and2	ENSDARG00000079302	LL0000000973	11	4.28872	0	0	0.858	0.066
and1	ENSDARG00000088514	LL0000000972	11	3.10141	0	0	0.771	0.03
pah	ENSDARG00000020143	LL0000021216	11	2.41365	0	0	0.717	0.049
c1qtnf5	ENSDARG00000056134	LL0000003902	11	2.13642	0	0	0.696	0.016
gch1	ENSDARG00000070453	LL0000011210	11	1.43324	0	0	0.554	0.033
si:ch211-14k19.8	ENSDARG00000088975	LL0000025143	11	1.29981	0	0	0.475	0.006
msx2b	ENSDARG00000101023	LL0000019666	11	1.28788	0	0	0.521	0.024
hoxa13b	ENSDARG00000036254	LL0000012244	11	1.0832	0	0	0.475	0.019
hoxa13a	ENSDARG00000100312	LL0000012243	11	0.806967	0	0	0.354	0.005
im:7150988	ENSDARG00000109310	LL0000012716	11	2.12267	7.27571e-262	1.6064e-257	0.442	0.025
mxra8a	ENSDARG00000062222	LL0000019788	11	1.15954	9.27158e-226	2.04707e-221	0.496	0.039
ttc36	ENSDARG00000011693	LL0000031302	11	1.88594	1.61142e-224	3.55785e-220	0.829	0.134
notum1b	ENSDARG00000117145	LL0000020491	11	1.13349	4.37285e-224	9.65482e-220	0.408	0.025
crabp2a	ENSDARG00000073978	LL0000007265	11	1.42919	1.08044e-217	2.3855e-213	0.629	0.071
ucp1	ENSDARG00000023151	LL0000031553	11	3.17926	2.10574e-211	4.64926e-207	0.746	0.117
tat	ENSDARG00000069630	LL0000029981	11	2.59725	7.15777e-211	1.58036e-206	0.8	0.14
pcbd1	ENSDARG00000031981	LL0000021349	11	2.10571	7.53914e-210	1.66457e-205	0.904	0.194
hpdb	ENSDARG00000044935	LL0000012295	11	2.98807	1.73089e-204	3.82162e-200	0.908	0.201
qdpra	ENSDARG00000040190	LL0000022986	11	2.1662	8.05347e-198	1.77813e-193	0.683	0.099
vcanb	ENSDARG00000009401	LL0000031820	11	1.65157	8.06826e-196	1.78139e-191	0.4	0.029
col1a1a	ENSDARG00000012405	LL0000005994	11	3.1291	6.31341e-172	1.39394e-167	0.962	0.308
slc16a10	ENSDARG00000020984	LL0000028502	11	1.70953	3.5754e-171	7.89412e-167	0.725	0.132
ecrg4a	ENSDARG00000056087	LL0000009365	11	2.2411	2.49449e-168	5.50758e-164	0.704	0.119
hgd	ENSDARG00000058005	LL0000012078	11	2.13907	1.0813e-159	2.3874e-155	0.892	0.248
aqp3a	ENSDARG00000003808	LL0000001214	11	2.18316	2.01711e-155	4.45358e-151	0.667	0.119
prrx1a	ENSDARG00000033971	LL0000022700	11	1.15978	1.37417e-152	3.03404e-148	0.608	0.092
si:ch211-76l23.4	ENSDARG00000096242	LL0000026136	11	1.95179	5.82216e-150	1.28547e-145	0.354	0.031
twist3	ENSDARG00000019646	LL0000031391	11	0.896071	6.41895e-136	1.41724e-131	0.525	0.073
zgc:66479	ENSDARG00000008732	LL0000039217	11	0.918768	5.60036e-133	1.2365e-128	0.45	0.056
kazald3	ENSDARG00000053509	LL0000013078	11	0.566803	1.33189e-122	2.94068e-118	0.308	0.027
prrx1b	ENSDARG00000042027	LL0000022701	11	0.727973	1.60367e-122	3.54075e-118	0.425	0.052
itgb1b.2	ENSDARG00000022689	LL0000012940	11	1.00274	8.78175e-122	1.93892e-117	0.338	0.035
si:ch73-86n18.1	ENSDARG00000056379	LL0000026585	11	1.03301	7.09669e-119	1.56688e-114	0.533	0.09
msx1b	ENSDARG00000008886	LL0000019664	11	1.02065	3.16175e-117	6.98083e-113	0.379	0.044
CABZ01092746.1	ENSDARG00000117319	LL0000004643	11	1.67853	3.72868e-116	8.23255e-112	0.667	0.151
bmp2a	ENSDARG00000013409	LL0000001945	11	0.583608	3.66905e-114	8.1009e-110	0.279	0.024
zic2a	ENSDARG00000015554	LL0000039303	11	0.805389	5.34344e-114	1.17978e-109	0.5	0.077
antxr1c	ENSDARG00000063612	LL0000001092	11	0.740744	1.26171e-112	2.78572e-108	0.392	0.049
tmem119b	ENSDARG00000068036	LL0000030458	11	0.665896	1.71609e-100	3.78896e-96	0.433	0.065
ucp2	ENSDARG00000043154	LL0000031554	11	2.19724	2.25995e-99	4.98975e-95	0.979	0.638
bhmt	ENSDARG00000013430	LL0000001893	11	1.53168	3.24945e-99	7.17445e-95	0.954	0.433
cbr1l	ENSDARG00000021149	LL0000004990	11	0.920129	5.44502e-97	1.20221e-92	0.525	0.104
gstz1	ENSDARG00000027984	LL0000011824	11	1.37728	3.65125e-92	8.06159e-88	0.8	0.298
msx3	ENSDARG00000015674	LL0000019667	11	0.708725	6.56367e-92	1.44919e-87	0.342	0.044
cd82b	ENSDARG00000026070	LL0000005257	11	0.824693	7.63138e-88	1.68493e-83	0.346	0.05
fmoda	ENSDARG00000044895	LL0000010422	11	0.745132	2.85122e-87	6.2952e-83	0.679	0.171
tspan18b	ENSDARG00000015015	LL0000031244	11	0.864021	1.51411e-85	3.34301e-81	0.533	0.116
bmp1a	ENSDARG00000028071	LL0000001943	11	0.568902	6.29246e-85	1.38931e-80	0.304	0.039
ctsk	ENSDARG00000040251	LL0000007761	11	0.871852	1.90533e-83	4.20678e-79	0.592	0.144
fkbp7	ENSDARG00000010962	LL0000010381	11	0.704863	1.06439e-80	2.35006e-76	0.408	0.072
si:dkey-12l12.1	ENSDARG00000094422	LL0000026730	11	1.42498	8.92482e-78	1.97051e-73	0.508	0.118
mxra8b	ENSDARG00000062129	LL0000019789	11	0.862693	9.85984e-78	2.17696e-73	0.625	0.16
bambia	ENSDARG00000055381	LL0000001788	11	0.841191	4.43429e-76	9.79046e-72	0.408	0.076
CABZ01085139.1	ENSDARG00000102687	LL0000004570	11	0.537001	2.86803e-75	6.33233e-71	0.271	0.034
serpine2	ENSDARG00000029353	LL0000024510	11	1.0161	1.32465e-67	2.92469e-63	0.525	0.141
lrrc17	ENSDARG00000037960	LL0000018351	11	0.744356	5.48227e-66	1.21043e-61	0.475	0.114
vstm4a	ENSDARG00000010154	LL0000031925	11	0.586925	1.14618e-65	2.53066e-61	0.317	0.052
nck1a	ENSDARG00000074262	LL0000020059	11	0.633588	2.45039e-65	5.41021e-61	0.488	0.115
glud1b	ENSDARG00000101074	LL0000011410	11	1.32124	1.11036e-64	2.45157e-60	0.742	0.315
prdx1	ENSDARG00000058734	LL0000022532	11	0.661108	1.80654e-64	3.98867e-60	0.367	0.07
zgc:174904	ENSDARG00000059049	LL0000039063	11	0.695025	2.56618e-64	5.66588e-60	0.504	0.122
mdh1aa	ENSDARG00000017772	LL0000018801	11	1.68902	8.06656e-61	1.78102e-56	0.812	0.429
akap12b	ENSDARG00000055678	LL0000000536	11	0.843036	2.53708e-60	5.60162e-56	0.446	0.108
mmp2	ENSDARG00000017676	LL0000019407	11	0.770491	3.17406e-59	7.00801e-55	0.658	0.212
cdo1	ENSDARG00000099389	LL0000005391	11	0.833676	1.00676e-58	2.22283e-54	0.558	0.167
fthl27	ENSDARG00000031776	LL0000010905	11	0.89972	9.40162e-57	2.07578e-52	0.954	0.757
timp2a	ENSDARG00000061226	LL0000030331	11	0.816289	3.90108e-53	8.61319e-49	0.558	0.175
ldhba	ENSDARG00000019644	LL0000013580	11	1.19545	5.06673e-52	1.11868e-47	0.833	0.487
angptl7	ENSDARG00000027582	LL0000000990	11	0.595043	2.24762e-51	4.96252e-47	0.388	0.088
ppib	ENSDARG00000092798	LL0000022374	11	0.921358	2.03527e-50	4.49366e-46	0.85	0.539
glud1a	ENSDARG00000008816	LL0000011409	11	0.773422	4.05932e-50	8.96258e-46	0.504	0.158
txn	ENSDARG00000031435	LL0000040303	11	1.04593	2.5347e-49	5.59636e-45	0.417	0.114
pck1	ENSDARG00000013522	LL0000021429	11	0.992784	4.45982e-49	9.84683e-45	0.412	0.108
BX571880.1	ENSDARG00000097533	LL0000003212	11	0.870916	1.59087e-48	3.51249e-44	0.267	0.05
lxn	ENSDARG00000043102	LL0000018460	11	0.957517	9.67651e-48	2.13648e-43	0.729	0.332
cd82a	ENSDARG00000019098	LL0000005256	11	0.575792	3.5153e-47	7.76144e-43	0.479	0.145
timp4.3	ENSDARG00000100795	LL0000030335	11	0.967623	1.25157e-46	2.76333e-42	0.412	0.118
zgc:153675	ENSDARG00000071555	LL0000038742	11	0.625646	1.29272e-46	2.8542e-42	0.425	0.119
ntd5	ENSDARG00000040944	LL0000020680	11	1.21549	3.47647e-46	7.67571e-42	0.521	0.182
ogna	ENSDARG00000044132	LL0000020833	11	1.26013	2.48698e-45	5.49101e-41	0.396	0.111
thbs4b	ENSDARG00000020072	LL0000030266	11	0.936738	1.89932e-43	4.19351e-39	0.383	0.102
mmp14a	ENSDARG00000002235	LL0000019398	11	0.548128	2.20393e-43	4.86606e-39	0.392	0.103
loxl2b	ENSDARG00000044074	LL0000018278	11	0.790491	5.85744e-43	1.29326e-38	0.383	0.105
tgm2b	ENSDARG00000074094	LL0000030243	11	0.50952	7.64107e-43	1.68707e-38	0.279	0.059
si:dkey-164f24.2	ENSDARG00000089418	LL0000026832	11	0.769273	9.9162e-43	2.1894e-38	0.408	0.118
twist1a	ENSDARG00000030402	LL0000031388	11	0.714536	1.36829e-41	3.02106e-37	0.442	0.132
sult6b1	ENSDARG00000086826	LL0000029672	11	0.794339	1.95279e-41	4.31156e-37	0.679	0.295
dcn	ENSDARG00000012066	LL0000008724	11	0.572957	2.02331e-41	4.46727e-37	0.45	0.134
selenop	ENSDARG00000093549	LL0000024463	11	0.917801	1.27195e-40	2.80834e-36	0.821	0.473
gstp1	ENSDARG00000104068	LL0000011818	11	0.775928	3.26097e-40	7.19989e-36	0.771	0.424
sparc	ENSDARG00000019353	LL0000029233	11	0.792499	5.23248e-40	1.15528e-35	0.829	0.44
ptgdsb.1	ENSDARG00000027088	LL0000022817	11	0.902719	8.75916e-40	1.93393e-35	0.746	0.407
sept9a	ENSDARG00000020235	LL0000024480	11	0.610776	2.17796e-39	4.80871e-35	0.354	0.097
pcolcea	ENSDARG00000056913	LL0000021449	11	0.522823	1.20718e-38	2.66533e-34	0.288	0.066
fkbp14	ENSDARG00000040695	LL0000010371	11	0.518609	9.65062e-38	2.13076e-33	0.333	0.088
prdx5	ENSDARG00000055064	LL0000022536	11	0.73157	1.85354e-36	4.09243e-32	0.658	0.32
ghrb	ENSDARG00000007671	LL0000011304	11	0.665068	2.94887e-35	6.51081e-31	0.379	0.118
dnase1l4.1	ENSDARG00000015123	LL0000009098	11	0.540007	3.14982e-34	6.95448e-30	0.296	0.079
plpp3	ENSDARG00000059933	LL0000022153	11	0.583844	7.18805e-33	1.58705e-28	0.575	0.233
ddt	ENSDARG00000044751	LL0000008767	11	0.650289	1.30489e-29	2.88106e-25	0.588	0.286
her6	ENSDARG00000006514	LL0000012054	11	0.583996	6.33067e-28	1.39775e-23	0.475	0.193
nfe2l2a	ENSDARG00000042824	LL0000020251	11	0.587097	9.45098e-28	2.08668e-23	0.554	0.261
sec61b	ENSDARG00000076568	LL0000024387	11	0.654057	1.38586e-27	3.05984e-23	0.804	0.554
got2b	ENSDARG00000005840	LL0000011527	11	0.709473	2.62731e-27	5.80083e-23	0.417	0.168
cyr61	ENSDARG00000023062	LL0000008623	11	0.698015	6.39968e-26	1.41298e-21	0.583	0.285
actb2	ENSDARG00000037870	LL0000000220	11	0.526756	1.24996e-25	2.75978e-21	0.996	0.936
tgfbi	ENSDARG00000071586	LL0000030228	11	1.33487	2.12881e-23	4.7002e-19	0.333	0.132
fbp1a	ENSDARG00000021366	LL0000010173	11	0.541943	2.4461e-23	5.40074e-19	0.458	0.202
hdlbpa	ENSDARG00000009830	LL0000012006	11	0.632418	1.76416e-19	3.89508e-15	0.596	0.343
f3b	ENSDARG00000005673	LL0000009918	11	0.558474	3.00504e-16	6.63482e-12	0.321	0.137
selenof	ENSDARG00000099664	LL0000024397	11	0.502006	1.0577e-14	2.3353e-10	0.471	0.264
sat1a.2	ENSDARG00000095908	LL0000024217	11	0.528505	3.87906e-14	8.56458e-10	0.467	0.261
mdh2	ENSDARG00000043371	LL0000018804	11	0.544247	2.50976e-10	5.54129e-06	0.7	0.528
cx43	ENSDARG00000041799	LL0000008472	12	3.91844	0	0	0.863	0.078
slc1a2b	ENSDARG00000102453	LL0000028540	12	3.84209	0	0	0.858	0.053
atp1a1b	ENSDARG00000019856	LL0000001580	12	3.35906	0	0	0.944	0.082
mfge8a	ENSDARG00000015349	LL0000018927	12	3.237	0	0	0.678	0.04
zgc:165461	ENSDARG00000040162	LL0000038884	12	3.14268	0	0	0.747	0.04
atp1b4	ENSDARG00000053262	LL0000001590	12	3.0186	0	0	0.91	0.046
slc6a1b	ENSDARG00000039647	LL0000028839	12	2.81648	0	0	0.614	0.028
ptn	ENSDARG00000102340	LL0000022861	12	2.31194	0	0	0.652	0.029
si:ch211-66e2.5	ENSDARG00000091579	LL0000026107	12	2.22553	0	0	0.665	0.012
slc4a4a	ENSDARG00000013730	LL0000028803	12	2.04165	0	0	0.614	0.02
hepacama	ENSDARG00000056934	LL0000012039	12	1.92849	0	0	0.635	0.013
hspb15	ENSDARG00000078411	LL0000012386	12	1.66944	0	0	0.395	0.003
si:ch1073-303k11.2	ENSDARG00000088247	LL0000024819	12	1.32663	0	0	0.442	0.018
slc7a10b	ENSDARG00000051730	LL0000028856	12	1.01563	0	0	0.253	0.001
cspg5b	ENSDARG00000099793	LL0000007454	12	2.09901	3.60609e-307	7.96188e-303	0.558	0.035
robo4	ENSDARG00000009387	LL0000023850	12	1.42846	5.04908e-299	1.11479e-294	0.318	0.009
sulf2a	ENSDARG00000018423	LL0000029653	12	1.29924	1.85065e-293	4.08606e-289	0.288	0.007
cldn7a	ENSDARG00000036376	LL0000005773	12	2.24131	3.45873e-292	7.63654e-288	0.451	0.023
s1pr1	ENSDARG00000042690	LL0000024155	12	2.46153	2.38415e-265	5.26396e-261	0.751	0.089
msrb2	ENSDARG00000018459	LL0000019654	12	0.996947	4.61312e-232	1.01853e-227	0.279	0.009
her4.4	ENSDARG00000009822	LL0000012052	12	2.19088	6.82732e-232	1.5074e-227	0.635	0.068
BX465834.1	ENSDARG00000095715	LL0000002752	12	1.97766	3.3033e-222	7.29335e-218	0.721	0.097
NPAS3	ENSDARG00000109820	LL0000020504	12	0.863331	1.11165e-216	2.45442e-212	0.275	0.01
efhd1	ENSDARG00000043446	LL0000009426	12	1.81944	5.85212e-215	1.29209e-210	0.562	0.055
ptprz1b	ENSDARG00000020871	LL0000022918	12	0.995881	3.56763e-199	7.87698e-195	0.279	0.012
slc38a3a	ENSDARG00000027065	LL0000028736	12	1.40454	9.92477e-198	2.19129e-193	0.429	0.033
crtac1a	ENSDARG00000059826	LL0000007340	12	1.6318	2.93376e-194	6.47745e-190	0.455	0.039
her4.2.1	ENSDARG00000056729		12	1.93781	1.83315e-191	4.04741e-187	0.609	0.074
CU467822.1	ENSDARG00000101584	LL0000007981	12	1.60409	8.35825e-190	1.84542e-185	0.622	0.078
mdkb	ENSDARG00000020708	LL0000018806	12	2.82663	3.0433e-185	6.7193e-181	0.97	0.294
fjx1	ENSDARG00000035873	LL0000010367	12	1.14957	2.6439e-180	5.83746e-176	0.309	0.018
syt11a	ENSDARG00000057913	LL0000029776	12	1.43954	2.85463e-179	6.30274e-175	0.549	0.063
fabp7a	ENSDARG00000007697	LL0000009941	12	3.22176	4.0231e-174	8.88261e-170	0.974	0.349
ptgdsb.2	ENSDARG00000071626	LL0000022818	12	3.06275	3.30619e-173	7.29974e-169	0.97	0.315
IGLON5	ENSDARG00000022176	LL0000012613	12	1.10425	3.4725e-173	7.66694e-169	0.361	0.026
slc3a2a	ENSDARG00000036427	LL0000028760	12	1.69831	6.89528e-172	1.52241e-167	0.536	0.063
her4.2	ENSDARG00000094426	LL0000012050	12	1.86287	8.32021e-168	1.83702e-163	0.519	0.06
her4.1	ENSDARG00000056732	LL0000012049	12	2.20811	4.06428e-166	8.97353e-162	0.545	0.069
ndrg3a	ENSDARG00000013087	LL0000020101	12	2.15219	6.76813e-161	1.49434e-156	0.712	0.134
qki2	ENSDARG00000010018	LL0000022989	12	1.04413	3.39239e-160	7.49007e-156	0.451	0.046
endouc	ENSDARG00000112234	LL0000009643	12	2.21921	1.26783e-159	2.79925e-155	0.489	0.058
abi3a	ENSDARG00000060072	LL0000000105	12	0.874099	9.57167e-158	2.11333e-153	0.266	0.015
CR848047.1	ENSDARG00000095906	LL0000007048	12	1.12838	3.02545e-141	6.67989e-137	0.395	0.039
glula	ENSDARG00000099776	LL0000011411	12	2.88162	1.36175e-140	3.00661e-136	0.97	0.446
cyp4t8	ENSDARG00000004964	LL0000008614	12	1.14606	3.16409e-137	6.98599e-133	0.361	0.034
aqp1a.1	ENSDARG00000023713	LL0000001212	12	1.73855	6.14773e-137	1.35736e-132	0.511	0.072
LO018196.1	ENSDARG00000117324	LL0000013826	12	0.897952	1.71172e-136	3.77931e-132	0.283	0.02
si:ch211-212k18.5	ENSDARG00000103316	LL0000025548	12	1.01356	3.23996e-131	7.15351e-127	0.348	0.033
eno1b	ENSDARG00000013750	LL0000009648	12	1.20326	2.01802e-130	4.45558e-126	0.391	0.042
mt2	ENSDARG00000041623	LL0000019674	12	2.36284	3.71013e-130	8.1916e-126	0.841	0.267
ptgdsb.1	ENSDARG00000027088	LL0000022817	12	2.7359	4.9926e-129	1.10232e-124	0.927	0.402
her15.1	ENSDARG00000054562	LL0000012046	12	1.40973	1.26622e-119	2.79569e-115	0.579	0.101
ttyh3b	ENSDARG00000007678	LL0000031344	12	1.20581	2.65766e-115	5.86786e-111	0.313	0.03
sox3	ENSDARG00000053569	LL0000029194	12	1.1243	1.1022e-114	2.43355e-110	0.481	0.072
acbd7	ENSDARG00000094730	LL0000000151	12	1.38079	3.7323e-113	8.24054e-109	0.472	0.072
si:dkey-85k7.7	ENSDARG00000101135	LL0000027983	12	2.14665	7.17681e-112	1.58457e-107	0.639	0.152
aldocb	ENSDARG00000019702	LL0000000886	12	1.4484	3.18901e-108	7.041e-104	0.755	0.209
pygmb	ENSDARG00000013317	LL0000022976	12	0.855039	1.60146e-107	3.53586e-103	0.296	0.029
slc6a9	ENSDARG00000018534	LL0000028852	12	1.34919	1.11223e-103	2.45569e-99	0.361	0.046
msi1	ENSDARG00000010710	LL0000019639	12	1.05169	7.04047e-103	1.55447e-98	0.528	0.098
ppap2d	ENSDARG00000069940	LL0000022348	12	1.42193	2.08314e-100	4.59936e-96	0.472	0.085
cd63	ENSDARG00000025147	LL0000005248	12	1.62938	7.11402e-97	1.5707e-92	0.944	0.495
smox	ENSDARG00000036967	LL0000029001	12	1.6895	3.17456e-96	7.00912e-92	0.562	0.127
proza	ENSDARG00000037783	LL0000022653	12	1.33943	2.03981e-94	4.5037e-90	0.635	0.168
sept8b	ENSDARG00000014233	LL0000024479	12	0.799499	5.45656e-94	1.20475e-89	0.258	0.025
sox2	ENSDARG00000070913	LL0000029190	12	0.827246	1.35416e-93	2.98984e-89	0.3	0.034
tmem47	ENSDARG00000057322	LL0000030623	12	1.04805	5.50489e-92	1.21542e-87	0.382	0.058
bsg	ENSDARG00000019881	LL0000002034	12	1.29756	6.04273e-90	1.33417e-85	0.944	0.605
notch3	ENSDARG00000052139	LL0000020486	12	1.03727	5.59261e-89	1.23479e-84	0.421	0.072
cadm4	ENSDARG00000040291	LL0000004791	12	1.06439	3.43282e-83	7.57932e-79	0.348	0.052
cd81a	ENSDARG00000036080	LL0000005254	12	1.26611	1.19095e-81	2.6295e-77	0.944	0.555
bckdhbl	ENSDARG00000093569	LL0000001834	12	0.947706	1.30202e-78	2.87474e-74	0.373	0.064
anxa13	ENSDARG00000013976	LL0000001099	12	1.06815	3.84189e-78	8.48251e-74	0.562	0.147
cldn12	ENSDARG00000003927	LL0000005759	12	0.947701	4.49824e-78	9.93167e-74	0.378	0.067
gpm6aa	ENSDARG00000055455	LL0000011571	12	0.976452	6.82834e-78	1.50763e-73	0.764	0.238
id1	ENSDARG00000040764	LL0000012459	12	1.57889	7.52523e-75	1.66149e-70	0.858	0.441
spred1	ENSDARG00000041449	LL0000029316	12	0.93534	9.60048e-75	2.11969e-70	0.352	0.06
pdxka	ENSDARG00000088959	LL0000021563	12	0.832649	2.54275e-73	5.61414e-69	0.318	0.05
mdka	ENSDARG00000036036	LL0000018805	12	2.29355	9.69325e-72	2.14017e-67	0.764	0.37
sox19a	ENSDARG00000010770	LL0000029186	12	0.926993	3.06013e-70	6.75645e-66	0.296	0.044
itm2ba	ENSDARG00000007098	LL0000012962	12	1.19618	2.92967e-69	6.46843e-65	0.794	0.386
cspg5a	ENSDARG00000069981	LL0000007453	12	0.918717	5.16774e-69	1.14098e-64	0.382	0.072
CR383676.1	ENSDARG00000099970	LL0000006421	12	0.868386	7.51806e-63	1.65991e-58	1	0.999
tspan7b	ENSDARG00000008407	LL0000031261	12	0.843474	1.76387e-62	3.89444e-58	0.378	0.074
mgll	ENSDARG00000036820	LL0000018968	12	0.962055	4.91543e-62	1.08528e-57	0.313	0.057
gnai2a	ENSDARG00000018174	LL0000011443	12	1.09855	9.86393e-62	2.17786e-57	0.562	0.182
cntfr	ENSDARG00000028661	LL0000005937	12	1.22128	5.80591e-57	1.28189e-52	0.408	0.101
rgma	ENSDARG00000012248	LL0000023592	12	0.8599	6.98241e-57	1.54165e-52	0.292	0.053
glulb	ENSDARG00000100003	LL0000011412	12	1.11596	3.82099e-56	8.43637e-52	0.815	0.515
spry2	ENSDARG00000078308	LL0000029324	12	1.1567	4.03059e-56	8.89915e-52	0.558	0.192
wls	ENSDARG00000009534	LL0000032077	12	1.11862	1.20729e-53	2.66557e-49	0.541	0.187
CABZ01080702.1	ENSDARG00000100562	LL0000004522	12	0.904252	1.36246e-53	3.00818e-49	0.399	0.1
timp4.3	ENSDARG00000100795	LL0000030335	12	1.25544	4.34483e-52	9.59294e-48	0.433	0.118
cebpd	ENSDARG00000087303	LL0000005408	12	0.90317	1.01896e-50	2.24977e-46	0.931	0.627
her15.1.1	ENSDARG00000054560		12	0.815573	2.3062e-50	5.09186e-46	0.305	0.06
si:ch211-251b21.1	ENSDARG00000007275	LL0000025837	12	1.70943	1.2301e-48	2.71595e-44	0.794	0.438
cd82a	ENSDARG00000019098	LL0000005256	12	0.872177	7.37244e-48	1.62776e-43	0.464	0.146
fgfr2	ENSDARG00000058115	LL0000010319	12	0.936288	4.18694e-47	9.24434e-43	0.313	0.071
her9	ENSDARG00000056438	LL0000012058	12	1.1267	1.9515e-46	4.30871e-42	0.421	0.124
gapdhs	ENSDARG00000039914	LL0000011139	12	0.775337	1.01794e-45	2.2475e-41	0.85	0.582
zgc:153704	ENSDARG00000045979	LL0000038744	12	1.32587	1.54408e-45	3.40917e-41	0.532	0.187
ptprfb	ENSDARG00000005754	LL0000022900	12	0.862073	3.95671e-45	8.73602e-41	0.3	0.069
cyp26b1	ENSDARG00000077121	LL0000008556	12	1.74977	1.17369e-44	2.5914e-40	0.365	0.098
coro1b	ENSDARG00000008660	LL0000006083	12	0.619399	1.48635e-44	3.28172e-40	0.253	0.048
cdo1	ENSDARG00000099389	LL0000005391	12	1.10206	4.69462e-44	1.03652e-39	0.481	0.169
si:dkey-56m19.5	ENSDARG00000068432	LL0000027754	12	0.955142	9.24753e-44	2.04176e-39	0.506	0.176
mob1bb	ENSDARG00000012953	LL0000019435	12	0.793584	2.66214e-42	5.87773e-38	0.326	0.083
phgdh	ENSDARG00000001873	LL0000021713	12	0.847397	2.87892e-42	6.35638e-38	0.309	0.075
cox4i2	ENSDARG00000022509	LL0000006105	12	0.972411	3.73432e-42	8.245e-38	0.433	0.138
sb:cb81	ENSDARG00000040503	LL0000024233	12	0.881057	1.5727e-41	3.47237e-37	0.339	0.087
ctsf	ENSDARG00000063095	LL0000007759	12	0.888742	4.88555e-38	1.07868e-33	0.601	0.278
sdcbp2	ENSDARG00000012513	LL0000024339	12	0.886792	1.33976e-37	2.95806e-33	0.674	0.38
lpin1	ENSDARG00000020239	LL0000018298	12	1.12018	2.22872e-37	4.92079e-33	0.7	0.398
rassf2a	ENSDARG00000029865	LL0000023238	12	0.567435	2.36605e-36	5.22401e-32	0.266	0.062
sesn1	ENSDARG00000020693	LL0000024523	12	1.0204	2.40703e-36	5.31449e-32	0.747	0.505
lfng	ENSDARG00000037879	LL0000013610	12	0.874472	3.54831e-36	7.83432e-32	0.416	0.139
si:ch211-286b5.5	ENSDARG00000096661	LL0000026022	12	0.927567	4.30538e-36	9.50585e-32	0.545	0.258
srgap3	ENSDARG00000060309	LL0000029372	12	0.657643	6.35486e-34	1.40309e-29	0.283	0.074
selenop	ENSDARG00000093549	LL0000024463	12	0.900479	1.07436e-33	2.37208e-29	0.76	0.475
cyp2p7	ENSDARG00000042980	LL0000008591	12	0.832883	3.57443e-33	7.89198e-29	0.309	0.089
cyp2ad3	ENSDARG00000022650	LL0000008574	12	0.85725	4.02087e-33	8.87767e-29	0.652	0.344
prnprs3	ENSDARG00000003705	LL0000022632	12	0.659461	1.08675e-32	2.39944e-28	0.262	0.065
agmo	ENSDARG00000025595	LL0000000464	12	0.705297	1.47401e-32	3.25448e-28	0.266	0.068
gas1b	ENSDARG00000067984	LL0000011148	12	0.780619	8.77463e-31	1.93735e-26	0.279	0.079
ctsd	ENSDARG00000057698	LL0000007758	12	0.803007	1.3148e-30	2.90294e-26	0.592	0.312
psap	ENSDARG00000013968	LL0000022721	12	1.16775	4.57088e-30	1.00921e-25	0.562	0.302
lpl	ENSDARG00000087697	LL0000018300	12	0.798822	5.12066e-30	1.13059e-25	0.502	0.214
nova2	ENSDARG00000017673	LL0000020494	12	0.58243	1.77151e-29	3.91132e-25	0.541	0.231
emc7	ENSDARG00000012144	LL0000009606	12	0.810776	4.43597e-29	9.79417e-25	0.348	0.121
ckbb	ENSDARG00000043257	LL0000005726	12	0.631787	7.68104e-29	1.6959e-24	0.781	0.508
dag1	ENSDARG00000016153	LL0000008663	12	0.661352	7.69869e-29	1.69979e-24	0.313	0.099
npc2	ENSDARG00000090912	LL0000020512	12	0.79433	4.75054e-28	1.04887e-23	0.648	0.389
pim3	ENSDARG00000055129	LL0000021814	12	0.715692	1.05164e-27	2.32191e-23	0.399	0.152
tmx2b	ENSDARG00000007786	LL0000030708	12	0.71369	1.7642e-27	3.89517e-23	0.262	0.075
pgrmc1	ENSDARG00000054172	LL0000021673	12	0.798542	3.6791e-27	8.12308e-23	0.511	0.257
emc10	ENSDARG00000054793	LL0000009601	12	0.803204	1.00785e-26	2.22523e-22	0.395	0.161
cxcl14	ENSDARG00000056627	LL0000008488	12	0.887032	1.50553e-26	3.32405e-22	0.262	0.076
cyp3c1	ENSDARG00000015575	LL0000008606	12	0.916264	1.15034e-25	2.53984e-21	0.485	0.24
ndnf	ENSDARG00000062936	LL0000020091	12	0.926957	1.33309e-24	2.94334e-20	0.343	0.126
ddt	ENSDARG00000044751	LL0000008767	12	0.797228	2.24328e-24	4.95294e-20	0.528	0.288
mgst3b	ENSDARG00000033364	LL0000018978	12	0.771588	3.40721e-24	7.52279e-20	0.67	0.459
zfp36l2	ENSDARG00000021806	LL0000038418	12	0.772462	1.85034e-23	4.08536e-19	0.412	0.183
ivns1abpb	ENSDARG00000013946	LL0000012986	12	0.825094	3.13341e-23	6.91826e-19	0.356	0.15
serinc1	ENSDARG00000009106	LL0000024488	12	0.746006	5.32498e-23	1.1757e-18	0.541	0.295
her6	ENSDARG00000006514	LL0000012054	12	1.0385	7.59409e-23	1.6767e-18	0.421	0.194
serpina10a	ENSDARG00000005924	LL0000024497	12	0.650418	1.40146e-22	3.09428e-18	0.27	0.089
s100v2	ENSDARG00000070702	LL0000024152	12	0.807116	3.95281e-22	8.72741e-18	0.468	0.236
chp2	ENSDARG00000025788	LL0000005622	12	0.594769	8.57691e-22	1.8937e-17	0.258	0.085
tmbim4	ENSDARG00000014361	LL0000030409	12	0.716781	9.93273e-22	2.19305e-17	0.365	0.158
nck1a	ENSDARG00000074262	LL0000020059	12	0.675526	1.02187e-21	2.25618e-17	0.313	0.12
vim	ENSDARG00000010008	LL0000031854	12	1.1738	3.50247e-20	7.7331e-16	0.403	0.176
pdap1b	ENSDARG00000002967	LL0000021473	12	0.75665	1.33386e-19	2.94503e-15	0.343	0.149
laptm4b	ENSDARG00000035870	LL0000013530	12	0.657287	2.55583e-19	5.64301e-15	0.3	0.116
aldoaa	ENSDARG00000011665	LL0000000882	12	0.611992	2.83636e-18	6.26239e-14	0.614	0.437
si:dkey-7j14.6	ENSDARG00000090552	LL0000027934	12	0.602741	4.61736e-18	1.01947e-13	0.541	0.321
perp	ENSDARG00000063572	LL0000021603	12	0.607368	5.72225e-16	1.26341e-11	0.373	0.188
msmo1	ENSDARG00000055876	LL0000019648	12	0.544999	6.37694e-16	1.40796e-11	0.275	0.114
mbd3b	ENSDARG00000061810	LL0000018722	12	0.529501	6.5844e-16	1.45377e-11	0.335	0.148
hif1al	ENSDARG00000100826	LL0000012108	12	0.640537	1.11878e-15	2.47015e-11	0.489	0.307
dap1b	ENSDARG00000086842		12	0.552834	4.709e-15	1.0397e-10	0.785	0.695
tsc22d1	ENSDARG00000038306	LL0000031212	12	0.528641	5.62201e-15	1.24128e-10	0.408	0.213
ndufb9	ENSDARG00000041314	LL0000020144	12	0.513581	7.23385e-14	1.59716e-09	0.554	0.393
bnip4	ENSDARG00000022832	LL0000001972	12	0.576917	8.3815e-14	1.85055e-09	0.403	0.234
metrnla	ENSDARG00000101914	LL0000018892	12	0.709157	2.65821e-13	5.86906e-09	0.326	0.166
cst3	ENSDARG00000007795	LL0000007470	12	0.749439	7.91011e-13	1.74647e-08	0.618	0.481
rtn4a	ENSDARG00000044601	LL0000024082	12	0.688514	9.90506e-13	2.18694e-08	0.506	0.358
foxo3b	ENSDARG00000042904	LL0000010617	12	0.551343	1.06134e-12	2.34333e-08	0.296	0.147
acadm	ENSDARG00000038900	LL0000000134	12	0.609115	1.12899e-12	2.49269e-08	0.399	0.245
sypl2a	ENSDARG00000055307	LL0000029772	12	0.533194	1.32895e-12	2.93419e-08	0.27	0.129
ywhae1	ENSDARG00000006399	LL0000038278	12	0.533661	1.74512e-12	3.85306e-08	0.524	0.373
ssuh2rs1	ENSDARG00000063292	LL0000029451	12	0.545993	4.05595e-12	8.95513e-08	0.27	0.129
gstr	ENSDARG00000042620	LL0000011820	12	0.558683	7.973e-12	1.76036e-07	0.421	0.268
mgst3a	ENSDARG00000102744	LL0000018977	12	0.577975	1.62391e-11	3.58543e-07	0.361	0.21
id3	ENSDARG00000054823	LL0000012462	12	0.662778	1.6003e-10	3.53331e-06	0.343	0.202
marcksl1a	ENSDARG00000039034	LL0000018675	12	0.556212	1.6404e-10	3.62184e-06	0.562	0.4
tsc22d3	ENSDARG00000105498		12	0.501088	1.23802e-09	2.73342e-05	0.438	0.293
rac1a	ENSDARG00000074849	LL0000023112	12	0.541671	1.31172e-09	2.89616e-05	0.296	0.17
tmem106ba	ENSDARG00000101936	LL0000030446	12	0.615864	2.62995e-08	0.000580666	0.305	0.187
rbp5	ENSDARG00000101481	LL0000023323	12	1.00383	6.79815e-08	0.00150096	0.27	0.158
cxl34b.11	ENSDARG00000092283	LL0000008505	13	2.919	0	0	0.969	0.03
cldni	ENSDARG00000054616	LL0000005786	13	2.91894	0	0	0.978	0.065
lgals1l1	ENSDARG00000088711	LL0000013614	13	2.76939	0	0	0.867	0.047
apoeb	ENSDARG00000040295	LL0000001193	13	2.40904	0	0	0.889	0.095
mmp30	ENSDARG00000045887	LL0000019417	13	2.12614	0	0	0.903	0.015
epgn	ENSDARG00000104992	LL0000009703	13	2.11435	0	0	0.903	0.015
si:ch1073-406l10.2	ENSDARG00000089645	LL0000024846	13	1.92874	0	0	0.92	0.038
spaca4l	ENSDARG00000116617	LL0000029222	13	1.7647	0	0	0.934	0.089
cldn1	ENSDARG00000040045	LL0000005753	13	1.70113	0	0	0.898	0.01
thy1	ENSDARG00000035018	LL0000030299	13	1.5741	0	0	0.717	0.032
zgc:92380	ENSDARG00000041339	LL0000039282	13	1.39117	0	0	0.85	0.032
cckb	ENSDARG00000100052	LL0000005118	13	1.35956	0	0	0.681	0.027
spint1a	ENSDARG00000102332	LL0000029289	13	1.2923	0	0	0.854	0.07
[truncated: 7,218 more rows]
