# Supplementary material for: An improved zebrafish transcriptome annotation for sensitive and comprehensive detection of cell type-specific genes
Source: eLife. 2020 Aug 24;9:e55792. doi: 10.7554/eLife.55792 (PMC7486121; doi:10.7554/eLife.55792)
Supplement: Figure 4—source data 3. — p-value, adjusted p-value and average log2 fold change refer to comparison of indicated cluster with all other clusters. Cutoffs are adjp <0.05, log2 fold change >0.5. Pct.1 is proportion of cells within indicated cluster that express detectable levels of the indicated gene. Pct.2 is proportion of all other cells that express detectable levels of the indicated gene. Matching LL and Ensembl gene IDs are included. [file elife-55792-fig4-data3.xlsx]

## Sheet: Sheet1
gene	LLgeneID	Ensdarg	avg_logFC	cluster	p_val	p_val_adj	pct.1	pct.2
ifitm1	LL0000012496	ENSDARG00000093303	1.73166	0	0	0	0.728	0.205
sfrp2	LL0000024566	ENSDARG00000070050	1.72066	0	0	0	0.423	0.052
cxcl12a	LL0000008486	ENSDARG00000037116	1.58732	0	0	0	0.513	0.107
pmp22a	LL0000022201	ENSDARG00000105223	1.34471	0	0	0	0.959	0.328
aspn	LL0000001500	ENSDARG00000002192	1.3103	0	0	0	0.343	0.033
rgs5a	LL0000023616	ENSDARG00000002644	1.19382	0	0	0	0.501	0.09
CABZ01092746.1	LL0000004643	ENSDARG00000117319	1.0969	0	0	0	0.507	0.101
krt18b	LL0000013462	ENSDARG00000028618	1.04343	0	0	0	0.758	0.238
col1a2	LL0000005996	ENSDARG00000020007	1.03304	0	0	0	0.799	0.226
ms4a17a.7	LL0000019624	ENSDARG00000043796	1.02952	0	0	0	0.433	0.07
dcn	LL0000008724	ENSDARG00000012066	1.02302	0	0	0	0.598	0.147
krt8	LL0000013466	ENSDARG00000058358	1.00362	0	0	0	0.913	0.399
hgd	LL0000012078	ENSDARG00000058005	0.874417	0	0	0	0.668	0.183
hpdb	LL0000012295	ENSDARG00000044935	0.772232	0	0	0	0.602	0.146
rbp4	LL0000023321	ENSDARG00000101199	1.05785	0	1.91825e-286	5.27499e-282	0.919	0.473
krt18a.1	LL0000013460	ENSDARG00000018404	0.850311	0	6.71748e-280	1.84724e-275	0.752	0.262
vim	LL0000031854	ENSDARG00000010008	1.25554	0	6.45545e-279	1.77518e-274	0.516	0.122
mfap2	LL0000018921	ENSDARG00000059367	0.930957	0	4.97747e-278	1.36876e-273	0.609	0.177
abi3bpb	LL0000000108	ENSDARG00000071095	1.19081	0	3.17512e-271	8.73126e-267	0.392	0.07
ms4a17a.9	LL0000019626	ENSDARG00000094854	0.968345	0	9.13988e-261	2.51338e-256	0.523	0.134
ptgdsb.2	LL0000022818	ENSDARG00000071626	0.919773	0	1.27199e-251	3.49785e-247	0.681	0.25
socs3a	LL0000029136	ENSDARG00000025428	1.0248	0	1.21369e-250	3.33752e-246	0.864	0.42
CU929237.1	LL0000008373	ENSDARG00000081800	0.796599	0	2.73788e-249	7.52891e-245	0.364	0.064
fmoda	LL0000010422	ENSDARG00000044895	0.67995	0	1.84726e-247	5.07979e-243	0.495	0.117
zgc:153704	LL0000038744	ENSDARG00000045979	1.17052	0	5.98369e-245	1.64545e-240	0.516	0.135
fstl1b	LL0000010896	ENSDARG00000039576	0.867053	0	3.66501e-244	1.00784e-239	0.6	0.189
cd81a	LL0000005254	ENSDARG00000036080	0.801319	0	4.48678e-243	1.23382e-238	0.908	0.474
fstl3	LL0000010897	ENSDARG00000025670	1.32121	0	5.18561e-242	1.42599e-237	0.436	0.097
col5a1	LL0000006015	ENSDARG00000012593	0.857352	0	3.60966e-239	9.92621e-235	0.601	0.182
col1a1b	LL0000005995	ENSDARG00000035809	0.735358	0	2.04667e-230	5.62815e-226	0.629	0.201
tmem176	LL0000030516	ENSDARG00000078659	0.799781	0	2.27859e-228	6.26591e-224	0.64	0.214
cebpd	LL0000005408	ENSDARG00000087303	0.832784	0	1.84329e-225	5.06885e-221	0.941	0.541
mxra8b	LL0000019789	ENSDARG00000062129	0.793482	0	4.27801e-224	1.17641e-219	0.449	0.11
si:ch211-251b21.1	LL0000025837	ENSDARG00000007275	1.04025	0	4.39441e-224	1.20842e-219	0.777	0.36
col6a4a	LL0000006023	ENSDARG00000079752	0.949959	0	2.34201e-221	6.44029e-217	0.309	0.052
cyr61	LL0000008623	ENSDARG00000023062	1.09707	0	2.22145e-215	6.10877e-211	0.613	0.21
si:ch1073-291c23.2	LL0000024815	ENSDARG00000074869	0.795402	0	1.4862e-213	4.08689e-209	0.481	0.135
fibina	LL0000010348	ENSDARG00000039949	0.810375	0	7.13341e-213	1.96162e-208	0.313	0.054
col12a1a	LL0000005981	ENSDARG00000078322	0.906513	0	5.24282e-211	1.44172e-206	0.401	0.093
junba	LL0000013045	ENSDARG00000074378	0.908461	0	1.95353e-209	5.37201e-205	0.867	0.483
cldn11a	LL0000005757	ENSDARG00000020031	0.954745	0	5.23024e-202	1.43826e-197	0.295	0.05
fosab	LL0000010566	ENSDARG00000031683	0.876782	0	1.49704e-200	4.11671e-196	0.937	0.672
col6a1	LL0000006020	ENSDARG00000074908	0.815043	0	8.50632e-199	2.33915e-194	0.393	0.093
zgc:162730	LL0000038847	ENSDARG00000103720	0.981741	0	3.46134e-195	9.51835e-191	0.865	0.485
ntd5	LL0000020680	ENSDARG00000040944	0.751444	0	1.78791e-193	4.91656e-189	0.462	0.128
nsa2	LL0000020644	ENSDARG00000007708	0.663277	0	5.17327e-188	1.4226e-183	0.922	0.685
sparc	LL0000029233	ENSDARG00000019353	0.589602	0	2.16599e-180	5.95625e-176	0.8	0.353
ogna	LL0000020833	ENSDARG00000044132	1.62414	0	2.49034e-176	6.84817e-172	0.33	0.075
sdc4	LL0000024337	ENSDARG00000059906	0.700222	0	2.08822e-175	5.7424e-171	0.81	0.432
si:ch211-286o17.1	LL0000026026	ENSDARG00000100446	0.708904	0	7.75517e-171	2.13259e-166	0.467	0.146
angptl1a	LL0000000982	ENSDARG00000012071	0.792312	0	1.11821e-170	3.07497e-166	0.312	0.068
bhmt	LL0000001893	ENSDARG00000013430	0.563071	0	2.30458e-166	6.33735e-162	0.788	0.37
fzd7b	LL0000011028	ENSDARG00000027589	0.691223	0	2.41813e-164	6.64961e-160	0.377	0.104
mych	LL0000019810	ENSDARG00000077473	0.784276	0	6.17247e-163	1.69737e-158	0.631	0.28
eif4ebp3l	LL0000009529	ENSDARG00000041607	0.768137	0	1.45849e-161	4.01069e-157	0.827	0.491
asip2b	LL0000001485	ENSDARG00000114760	1.02026	0	1.4483e-160	3.98267e-156	0.261	0.051
ecrg4a	LL0000009365	ENSDARG00000056087	0.797999	0	1.73845e-160	4.78056e-156	0.356	0.09
eef1da	LL0000009400	ENSDARG00000102291	0.585265	0	2.63126e-159	7.23571e-155	0.95	0.662
gstz1	LL0000011824	ENSDARG00000027984	0.690357	0	8.12115e-158	2.23324e-153	0.574	0.237
igf2b	LL0000012531	ENSDARG00000033307	0.667918	0	2.18522e-157	6.00915e-153	0.34	0.087
socs3b	LL0000029137	ENSDARG00000026611	0.814129	0	4.04421e-156	1.11212e-151	0.528	0.205
si:dkey-12l12.1	LL0000026730	ENSDARG00000094422	0.846826	0	1.18419e-154	3.2564e-150	0.334	0.083
wnt11r	LL0000032086	ENSDARG00000014796	1.12881	0	8.34551e-154	2.29493e-149	0.296	0.068
jun	LL0000013044	ENSDARG00000043531	0.780891	0	6.91533e-153	1.90165e-148	0.793	0.451
fzd2	LL0000011021	ENSDARG00000054438	0.635649	0	5.48571e-152	1.50851e-147	0.327	0.084
col5a2a	LL0000006016	ENSDARG00000031678	0.676416	0	1.06054e-148	2.91637e-144	0.403	0.12
si:dkey-239h2.3	LL0000027278	ENSDARG00000092033	0.833728	0	5.13793e-148	1.41288e-143	0.542	0.228
rarga	LL0000023202	ENSDARG00000034117	0.62595	0	5.78907e-148	1.59194e-143	0.426	0.141
cyp26b1	LL0000008556	ENSDARG00000077121	0.641216	0	2.59998e-147	7.14968e-143	0.294	0.067
cyp2ad3	LL0000008574	ENSDARG00000022650	0.798896	0	1.29901e-145	3.57214e-141	0.618	0.281
cdh11	LL0000005316	ENSDARG00000021442	0.600261	0	5.46282e-145	1.50222e-140	0.361	0.1
sult6b1	LL0000029672	ENSDARG00000086826	0.692444	0	8.3232e-144	2.2888e-139	0.541	0.224
olfml3b	LL0000020871	ENSDARG00000062171	0.644415	0	3.34543e-143	9.19961e-139	0.283	0.067
fstb	LL0000010894	ENSDARG00000057992	0.823791	0	1.27085e-142	3.4947e-138	0.275	0.062
mmp2	LL0000019407	ENSDARG00000017676	0.783051	0	4.9325e-141	1.35639e-136	0.457	0.159
ttc36	LL0000031302	ENSDARG00000011693	0.595029	0	8.39023e-138	2.30723e-133	0.375	0.111
angptl4	LL0000000987	ENSDARG00000035859	0.682036	0	8.88826e-135	2.44418e-130	0.472	0.182
cish	LL0000005712	ENSDARG00000060316	0.706869	0	6.83707e-133	1.88013e-128	0.47	0.185
prrx1a	LL0000022700	ENSDARG00000033971	0.629883	0	1.11069e-132	3.0543e-128	0.277	0.066
rsl24d1	LL0000024053	ENSDARG00000040439	0.504562	0	5.08975e-132	1.39963e-127	0.928	0.725
cd28l	LL0000005234	ENSDARG00000069978	0.635844	0	6.40368e-132	1.76095e-127	0.343	0.102
loxl2b	LL0000018278	ENSDARG00000044074	0.564171	0	1.70738e-130	4.69513e-126	0.288	0.074
nop53	LL0000020473	ENSDARG00000100452	0.630412	0	2.27531e-129	6.25688e-125	0.771	0.477
serpinf1	LL0000024512	ENSDARG00000069048	0.652486	0	3.35442e-129	9.22432e-125	0.287	0.073
fgfrl1a	LL0000010322	ENSDARG00000032617	0.622784	0	9.53273e-128	2.62141e-123	0.269	0.067
angptl7	LL0000000990	ENSDARG00000027582	1.18793	0	2.10917e-123	5.8e-119	0.259	0.063
zgc:174904	LL0000039063	ENSDARG00000059049	0.695212	0	1.6275e-121	4.47546e-117	0.326	0.096
colec12	LL0000006035	ENSDARG00000061140	0.593365	0	7.24794e-121	1.99311e-116	0.285	0.077
rsl1d1	LL0000024052	ENSDARG00000055868	0.631499	0	1.43997e-119	3.95977e-115	0.578	0.291
mab21l2	LL0000018507	ENSDARG00000015266	0.549693	0	5.27282e-119	1.44997e-114	0.31	0.089
s100v2	LL0000024152	ENSDARG00000070702	0.586087	0	5.87804e-119	1.6164e-114	0.45	0.174
thbs4b	LL0000030266	ENSDARG00000020072	0.768795	0	8.86168e-119	2.43687e-114	0.279	0.074
ptgdsb.1	LL0000022817	ENSDARG00000027088	0.631046	0	4.81139e-117	1.32308e-112	0.651	0.354
tpm4a	LL0000030877	ENSDARG00000023963	0.557918	0	2.61226e-116	7.18344e-112	0.44	0.167
twist1a	LL0000031388	ENSDARG00000030402	0.523868	0	1.38325e-113	3.8038e-109	0.322	0.096
twist3	LL0000031391	ENSDARG00000019646	0.645063	0	2.20538e-113	6.06457e-109	0.275	0.076
slc38a5b	LL0000028740	ENSDARG00000014587	0.593394	0	4.41884e-111	1.21514e-106	0.56	0.27
timp2a	LL0000030331	ENSDARG00000061226	0.582205	0	4.66966e-110	1.28411e-105	0.371	0.132
cbx7a	LL0000005004	ENSDARG00000038025	0.575162	0	5.83267e-108	1.60393e-103	0.476	0.199
plscr3b	LL0000022173	ENSDARG00000069432	0.543144	0	6.18188e-104	1.69996e-99	0.442	0.186
lpl	LL0000018300	ENSDARG00000087697	0.799419	0	9.33105e-104	2.56594e-99	0.426	0.177
cyp2ad2	LL0000008573	ENSDARG00000021172	0.77702	0	5.91809e-103	1.62742e-98	0.289	0.086
si:dkey-7j14.6	LL0000027934	ENSDARG00000090552	0.555092	0	2.12669e-102	5.84819e-98	0.52	0.252
cd99	LL0000005261	ENSDARG00000051975	0.605573	0	1.10553e-101	3.0401e-97	0.311	0.106
si:dkey-9i23.16	LL0000028065	ENSDARG00000093954	0.501013	0	4.97067e-101	1.36688e-96	0.347	0.122
eif4ebp3	LL0000009528	ENSDARG00000054916	0.525995	0	6.86383e-99	1.88749e-94	0.608	0.334
klf2a	LL0000013361	ENSDARG00000042667	0.82763	0	1.02911e-94	2.82994e-90	0.303	0.102
mycb	LL0000019806	ENSDARG00000007241	0.645562	0	4.61769e-94	1.26982e-89	0.457	0.211
lxn	LL0000018460	ENSDARG00000043102	0.670006	0	2.47426e-92	6.80396e-88	0.536	0.271
ddit4	LL0000008760	ENSDARG00000037618	0.590668	0	1.1892e-91	3.27018e-87	0.306	0.105
cst14b.1	LL0000007468	ENSDARG00000117133	0.558813	0	1.03972e-89	2.85912e-85	0.42	0.183
si:dkey-11f4.14	LL0000026687	ENSDARG00000098461	0.590537	0	1.55861e-89	4.28604e-85	0.486	0.237
zgc:92744	LL0000040305	ENSDARG00000076223	0.501883	0	7.39119e-89	2.0325e-84	0.738	0.495
mcl1b	LL0000018767	ENSDARG00000008363	0.525533	0	3.64375e-88	1.002e-83	0.629	0.356
npm1a	LL0000020532	ENSDARG00000014329	0.505491	0	1.29355e-84	3.55713e-80	0.631	0.373
ier2a	LL0000012474	ENSDARG00000099195	0.719387	0	5.22064e-83	1.43562e-78	0.686	0.446
plpp3	LL0000022153	ENSDARG00000059933	0.557091	0	2.17962e-81	5.99375e-77	0.421	0.19
sdc2	LL0000024336	ENSDARG00000002731	0.506379	0	5.07589e-78	1.39582e-73	0.375	0.167
entpd1	LL0000009666	ENSDARG00000045066	0.536952	0	1.32848e-77	3.65319e-73	0.272	0.096
ier2b	LL0000012475	ENSDARG00000086881	0.523565	0	5.5308e-76	1.52091e-71	0.651	0.397
junbb	LL0000013046	ENSDARG00000104773	0.630515	0	1.79945e-75	4.94831e-71	0.409	0.198
cyp2n13	LL0000008588	ENSDARG00000042953	0.50589	0	5.43509e-68	1.49459e-63	0.294	0.116
f3b	LL0000009918	ENSDARG00000005673	0.708336	0	9.24952e-67	2.54353e-62	0.29	0.116
gbp	LL0000011191	ENSDARG00000040059	0.572599	0	1.1074e-65	3.04524e-61	0.482	0.268
ccl25b	LL0000005126	ENSDARG00000070873	1.10582	0	2.23274e-64	6.13982e-60	0.263	0.101
ctgfa	LL0000007729	ENSDARG00000042934	0.577009	0	8.33706e-51	2.29261e-46	0.286	0.127
id1	LL0000012459	ENSDARG00000040764	0.517297	0	4.15654e-49	1.14301e-44	0.591	0.384
si:ch73-335l21.4	LL0000026464	ENSDARG00000091234	0.773217	0	6.82398e-38	1.87653e-33	0.386	0.231
gnao1b	LL0000011450	ENSDARG00000036058	3.09123	1	0	0	0.628	0.061
rs1a	LL0000024045	ENSDARG00000027236	2.90132	1	0	0	0.684	0.103
gnb3a	LL0000011461	ENSDARG00000004358	2.82266	1	0	0	0.591	0.039
cabp5b	LL0000003972	ENSDARG00000028485	2.68656	1	0	0	0.493	0.037
vsx1	LL0000031927	ENSDARG00000056292	2.62819	1	0	0	0.619	0.052
calb2b	LL0000004799	ENSDARG00000036344	2.62321	1	0	0	0.54	0.045
nrn1lb	LL0000020629	ENSDARG00000061149	2.54909	1	0	0	0.586	0.035
gng13b	LL0000011471	ENSDARG00000037921	2.40502	1	0	0	0.526	0.059
syt5b	LL0000029792	ENSDARG00000011640	2.36639	1	0	0	0.764	0.095
vamp1	LL0000031789	ENSDARG00000031283	2.3553	1	0	0	0.639	0.047
rgs16	LL0000023606	ENSDARG00000040177	2.32803	1	0	0	0.566	0.046
si:ch73-256g18.2	LL0000026368	ENSDARG00000105527	2.25402	1	0	0	0.504	0.028
si:ch1073-83n3.2	LL0000024877		2.24241	1	0	0	0.543	0.032
cabp2a	LL0000003967	ENSDARG00000052016	2.19044	1	0	0	0.473	0.031
snap25b	LL0000029041	ENSDARG00000058117	2.1064	1	0	0	0.74	0.16
lin7a	LL0000013688	ENSDARG00000013414	2.10356	1	0	0	0.527	0.064
sncgb	LL0000029055	ENSDARG00000109715	2.07628	1	0	0	0.574	0.098
foxg1b	LL0000010590	ENSDARG00000032705	2.0679	1	0	0	0.663	0.117
neurod4	LL0000020226	ENSDARG00000003469	2.05137	1	0	0	0.516	0.061
bhlhe23	LL0000001890	ENSDARG00000037588	2.04204	1	0	0	0.393	0.036
atp1b2a	LL0000001586	ENSDARG00000099203	1.99888	1	0	0	0.645	0.124
crx	LL0000007347	ENSDARG00000011989	1.901	1	0	0	0.496	0.069
npdc1a	LL0000020514	ENSDARG00000074697	1.86004	1	0	0	0.451	0.054
gabrr2a	LL0000011078	ENSDARG00000052982	1.73571	1	0	0	0.319	0.019
gabrb3	LL0000011070	ENSDARG00000023771	1.71431	1	0	0	0.365	0.027
BX663503.1	LL0000003410	ENSDARG00000092142	1.58886	1	0	0	0.314	0.021
golga7ba	LL0000011506	ENSDARG00000036295	1.78914	1	1.8149e-296	4.9908e-292	0.487	0.072
gabrr1	LL0000011076	ENSDARG00000043902	1.64479	1	2.81065e-283	7.72899e-279	0.267	0.017
otx5	LL0000021140	ENSDARG00000043483	1.72916	1	6.35341e-273	1.74712e-268	0.498	0.082
sv2bb	LL0000029707	ENSDARG00000060711	1.50467	1	6.24989e-266	1.71866e-261	0.331	0.032
nell2b	LL0000020200	ENSDARG00000062797	1.67942	1	4.62364e-262	1.27146e-257	0.373	0.044
slc17a7a	LL0000028524	ENSDARG00000016480	1.42509	1	1.90453e-254	5.23727e-250	0.274	0.021
sh3gl2a	LL0000024639	ENSDARG00000023600	1.87973	1	1.87944e-253	5.16827e-249	0.541	0.11
epb41a	LL0000009686	ENSDARG00000099283	1.78094	1	3.05407e-253	8.39839e-249	0.628	0.16
anp32e	LL0000001086	ENSDARG00000054804	1.91447	1	8.19325e-247	2.25306e-242	0.799	0.352
ppp1r1b	LL0000022430	ENSDARG00000076280	1.44341	1	2.16374e-242	5.95005e-238	0.283	0.025
mpp6b	LL0000019497	ENSDARG00000029761	1.72046	1	3.34565e-242	9.2002e-238	0.465	0.082
ckbb	LL0000005726	ENSDARG00000043257	1.52295	1	1.97665e-229	5.43558e-225	0.902	0.509
efna1b	LL0000009430	ENSDARG00000018787	1.97862	1	1.49557e-228	4.11266e-224	0.507	0.106
si:ch73-1a9.3	LL0000026297	ENSDARG00000103919	1.36533	1	2.79061e-220	7.6739e-216	0.961	0.832
ptmab	LL0000022860	ENSDARG00000101766	1.19764	1	1.52317e-217	4.18856e-213	0.981	0.847
samsn1a	LL0000024193	ENSDARG00000054543	1.49163	1	2.30745e-208	6.34525e-204	0.319	0.041
sh3bgrl2	LL0000024625	ENSDARG00000036878	1.78564	1	6.78504e-205	1.86582e-200	0.364	0.056
pvalb9	LL0000022954	ENSDARG00000071601	1.72273	1	1.24217e-203	3.41585e-199	0.266	0.027
zgc:162707	LL0000038846	ENSDARG00000061664	1.4851	1	3.97248e-194	1.09239e-189	0.299	0.038
histh1l	LL0000012141	ENSDARG00000035519	1.47617	1	6.43363e-194	1.76918e-189	0.902	0.621
nme2a	LL0000020415	ENSDARG00000043820	2.11745	1	7.19945e-194	1.97978e-189	0.358	0.057
pcbp3	LL0000021351	ENSDARG00000054378	1.38722	1	3.2551e-190	8.9512e-186	0.342	0.052
isl1	LL0000012899	ENSDARG00000004023	1.63176	1	1.17088e-189	3.2198e-185	0.308	0.042
sypb	LL0000029770	ENSDARG00000002230	1.47512	1	3.05926e-187	8.41266e-183	0.432	0.086
itm2cb	LL0000012965	ENSDARG00000039650	1.69899	1	9.92117e-186	2.72822e-181	0.378	0.068
atp6v0cb	LL0000001634	ENSDARG00000036577	1.41114	1	6.82456e-169	1.87669e-164	0.586	0.188
stx3a	LL0000029620	ENSDARG00000001880	1.35094	1	5.25779e-164	1.44584e-159	0.277	0.039
chn1	LL0000005616	ENSDARG00000101735	1.38068	1	1.26331e-160	3.47399e-156	0.336	0.06
atpv0e2	LL0000001665	ENSDARG00000059057	1.44802	1	1.18433e-152	3.25679e-148	0.561	0.191
CABZ01038709.1	LL0000004092	ENSDARG00000101026	1.97891	1	1.4759e-147	4.05858e-143	0.306	0.054
cplx4a	LL0000006147	ENSDARG00000059978	1.28827	1	4.34718e-144	1.19543e-139	0.263	0.039
gapdhs	LL0000011139	ENSDARG00000039914	1.45076	1	5.64831e-141	1.55323e-136	0.795	0.564
aldocb	LL0000000886	ENSDARG00000019702	1.5731	1	6.30632e-138	1.73417e-133	0.582	0.23
camk2d2	LL0000004841	ENSDARG00000014273	1.35168	1	1.01049e-135	2.77875e-131	0.264	0.043
map4l	LL0000018618	ENSDARG00000068745	1.35181	1	5.26224e-133	1.44706e-128	0.294	0.055
eno1a	LL0000009647	ENSDARG00000022456	1.78354	1	6.06516e-128	1.66786e-123	0.61	0.297
efna1a	LL0000009429	ENSDARG00000030326	1.69944	1	8.78401e-127	2.41552e-122	0.4	0.112
eml1	LL0000009618	ENSDARG00000042840	1.36362	1	9.29859e-125	2.55702e-120	0.317	0.068
h3f3c	LL0000011907	ENSDARG00000033009	1.06317	1	1.0763e-118	2.95971e-114	0.823	0.735
hmgn7	LL0000012182	ENSDARG00000062326	1.14059	1	1.36365e-108	3.7499e-104	0.792	0.695
fam107b	LL0000009960	ENSDARG00000026865	1.70803	1	2.28788e-108	6.29143e-104	0.535	0.238
hmgn6	LL0000012181	ENSDARG00000087636	0.950589	1	2.8399e-102	7.80944e-98	0.807	0.674
ptmaa	LL0000022859	ENSDARG00000021113	0.790491	1	4.573e-102	1.25753e-97	0.877	0.746
si:dkey-16p21.8	LL0000026857	ENSDARG00000096849	1.57227	1	1.92171e-100	5.2845e-96	0.614	0.362
waslb	LL0000031975	ENSDARG00000006283	1.45987	1	4.06105e-96	1.11675e-91	0.316	0.086
laptm4b	LL0000013530	ENSDARG00000035870	1.31746	1	2.89631e-94	7.96456e-90	0.387	0.126
ubl3a	LL0000031510	ENSDARG00000099532	1.5614	1	2.21486e-93	6.09063e-89	0.467	0.202
nsg2	LL0000020653	ENSDARG00000102975	1.63462	1	1.38438e-92	3.8069e-88	0.379	0.121
si:ch211-195b13.1	LL0000025388	ENSDARG00000016623	1.67673	1	4.33966e-92	1.19336e-87	0.336	0.1
h1f0	LL0000011896	ENSDARG00000038559	1.13757	1	1.95974e-88	5.38908e-84	0.689	0.463
prss59.2	LL0000022709	ENSDARG00000073742	0.516095	1	4.30458e-87	1.18372e-82	0.88	0.896
rnasekb	LL0000023741	ENSDARG00000104458	1.07606	1	3.07428e-79	8.45396e-75	0.51	0.24
CELA1-1-of-many	LL0000005414	ENSDARG00000095462	0.514181	1	8.76116e-78	2.40923e-73	0.841	0.841
nfil3-6	LL0000020261	ENSDARG00000087188	1.60392	1	9.61308e-77	2.6435e-72	0.3	0.092
bcl2l13	LL0000001845	ENSDARG00000062370	1.23721	1	7.9503e-76	2.18625e-71	0.264	0.073
prss59.1	LL0000022708	ENSDARG00000079274	0.528928	1	7.15858e-74	1.96854e-69	0.821	0.797
h2afx1	LL0000011903	ENSDARG00000068995	1.1092	1	1.94618e-73	5.35181e-69	0.695	0.563
bhlhe40	LL0000001891	ENSDARG00000004060	1.55821	1	4.04103e-73	1.11124e-68	0.481	0.254
si:dkey-56f14.7	LL0000027745	ENSDARG00000055400	1.12342	1	8.97941e-70	2.46925e-65	0.258	0.072
si:ch73-281n10.2	LL0000026414	ENSDARG00000097102	0.775057	1	1.21592e-66	3.34365e-62	0.774	0.723
grb2b	LL0000011697	ENSDARG00000038059	1.32612	1	5.12711e-63	1.4099e-58	0.313	0.116
mdh1aa	LL0000018801	ENSDARG00000017772	1.00614	1	2.21288e-60	6.08519e-56	0.594	0.419
nova2	LL0000020494	ENSDARG00000017673	1.0746	1	8.00712e-57	2.20188e-52	0.454	0.235
gpm6aa	LL0000011571	ENSDARG00000055455	0.908687	1	6.21828e-55	1.70997e-50	0.487	0.253
ywhaqa	LL0000038283	ENSDARG00000042539	1.65514	1	3.51912e-54	9.67722e-50	0.434	0.25
cpe	LL0000006134	ENSDARG00000055874	1.03554	1	5.06577e-51	1.39304e-46	0.311	0.126
atp6v1g1	LL0000001648	ENSDARG00000022315	1.20389	1	3.34034e-50	9.1856e-46	0.451	0.271
atp6v1ba	LL0000001640	ENSDARG00000013443	1.12797	1	4.19981e-48	1.15491e-43	0.294	0.122
scg3	LL0000024280	ENSDARG00000086288	0.893779	1	8.70126e-47	2.39276e-42	0.253	0.091
FQ323156.1	LL0000010829	ENSDARG00000100697	1.21291	1	5.84131e-45	1.6063e-40	0.549	0.46
si:ch1073-429i10.3.1	LL0000040151	ENSDARG00000068436	1.02699	1	1.46982e-44	4.04187e-40	0.588	0.515
neurod1	LL0000020224	ENSDARG00000019566	1.10051	1	6.99478e-42	1.92349e-37	0.266	0.104
calm1b	LL0000004816	ENSDARG00000034187	1.2005	1	9.41862e-42	2.59003e-37	0.292	0.131
bhlhe41	LL0000001892	ENSDARG00000041691	1.34605	1	5.0859e-41	1.39857e-36	0.341	0.178
mdkb	LL0000018806	ENSDARG00000020708	0.560314	1	1.37174e-39	3.77214e-35	0.496	0.304
atp6v1e1b	LL0000001646	ENSDARG00000030694	1.09125	1	5.30443e-38	1.45866e-33	0.355	0.194
tpi1b	LL0000030872	ENSDARG00000040988	1.10465	1	1.90398e-37	5.23574e-33	0.451	0.312
laptm4a	LL0000013529	ENSDARG00000006397	1.20833	1	1.9692e-34	5.4151e-30	0.39	0.253
ND2	LL0000020079	ENSDARG00000063899	0.505583	1	1.08621e-32	2.98697e-28	0.784	0.846
pvalb8	LL0000022953	ENSDARG00000037790	0.574317	1	5.95346e-32	1.63714e-27	0.28	0.139
fkbp1aa	LL0000010373	ENSDARG00000022684	0.640371	1	6.58717e-31	1.81141e-26	0.658	0.697
calm2a	LL0000004817	ENSDARG00000031427	1.06104	1	1.06073e-30	2.9169e-26	0.502	0.425
btg1	LL0000002062	ENSDARG00000027249	1.03387	1	2.5425e-30	6.99162e-26	0.589	0.607
atp6ap2	LL0000001627	ENSDARG00000008735	1.03447	1	1.18933e-29	3.27053e-25	0.347	0.212
tob1b	LL0000030801	ENSDARG00000021372	1.02777	1	5.59458e-28	1.53845e-23	0.532	0.506
oaz1a	LL0000020796	ENSDARG00000071403	0.74772	1	7.01284e-27	1.92846e-22	0.583	0.609
pkma	LL0000022026	ENSDARG00000099730	1.1029	1	3.28733e-26	9.03983e-22	0.375	0.261
ndrg3a	LL0000020101	ENSDARG00000013087	0.847563	1	4.21308e-26	1.15855e-21	0.269	0.141
dynll1	LL0000009312	ENSDARG00000058454	0.830755	1	5.30533e-26	1.45891e-21	0.532	0.479
gpm6ab	LL0000011572	ENSDARG00000004621	0.611419	1	2.87637e-25	7.90972e-21	0.398	0.247
rasgef1ba	LL0000023220	ENSDARG00000033614	1.13089	1	1.86931e-24	5.14043e-20	0.314	0.196
calm1a	LL0000039771	ENSDARG00000021811	1.01779	1	6.79674e-24	1.86903e-19	0.468	0.389
zfhx4	LL0000038415	ENSDARG00000075542	1.00157	1	6.23987e-23	1.7159e-18	0.255	0.138
si:ch211-196l7.4	LL0000025415	ENSDARG00000095451	0.785247	1	1.23971e-22	3.40907e-18	0.56	0.58
stmn1b	LL0000029570	ENSDARG00000033655	0.552348	1	1.79696e-19	4.94146e-15	0.429	0.304
oaz1b	LL0000020797	ENSDARG00000104782	0.816483	1	3.78936e-18	1.04204e-13	0.504	0.515
pdcl	LL0000021487	ENSDARG00000009480	0.8535	1	4.11826e-16	1.13248e-11	0.257	0.165
atp5f1b	LL0000001603	ENSDARG00000070083	0.571002	1	2.02769e-15	5.57594e-11	0.586	0.665
tsc22d1	LL0000031212	ENSDARG00000038306	0.835436	1	6.11025e-15	1.68026e-10	0.294	0.209
znf395b	LL0000039598	ENSDARG00000024195	0.904971	1	1.00889e-14	2.77435e-10	0.337	0.271
h1fx	LL0000011897	ENSDARG00000054058	0.685833	1	1.87139e-14	5.14614e-10	0.44	0.36
eif1b	LL0000009479	ENSDARG00000012688	0.50814	1	8.64511e-14	2.37732e-09	0.602	0.723
anp32a	LL0000001084	ENSDARG00000006487	0.725699	1	2.45581e-12	6.75323e-08	0.485	0.524
si:ch211-288g17.3	LL0000026030	ENSDARG00000070959	0.551279	1	2.47137e-12	6.79601e-08	0.412	0.35
cst3	LL0000007470	ENSDARG00000007795	0.78398	1	3.68179e-12	1.01245e-07	0.462	0.469
marcksl1b	LL0000018676	ENSDARG00000035715	0.641971	1	4.40917e-12	1.21248e-07	0.512	0.492
zc4h2	LL0000038356	ENSDARG00000015314	0.575311	1	7.69552e-12	2.11619e-07	0.309	0.228
hmgb1a	LL0000012168	ENSDARG00000099175	0.639894	1	4.3853e-11	1.20591e-06	0.49	0.499
ywhah	LL0000038282	ENSDARG00000005560	0.770303	1	4.57139e-11	1.25709e-06	0.289	0.222
ip6k2b	LL0000012815	ENSDARG00000019613	0.89669	1	4.6261e-10	1.27213e-05	0.278	0.222
stk35	LL0000029560	ENSDARG00000086856	0.887655	1	2.22894e-09	6.12935e-05	0.303	0.262
nr1d2a	LL0000020569	ENSDARG00000003820	0.853266	1	3.89139e-08	0.00107009	0.331	0.31
aldoaa	LL0000000882	ENSDARG00000011665	0.774437	1	9.84838e-08	0.00270821	0.393	0.412
smarce1	LL0000028959	ENSDARG00000016871	0.682131	1	1.05352e-07	0.00289707	0.328	0.297
ctsf	LL0000007759	ENSDARG00000063095	0.744732	1	1.39392e-07	0.00383314	0.306	0.273
serinc1	LL0000024488	ENSDARG00000009106	0.677702	1	1.9077e-07	0.00524598	0.333	0.305
h2afva	LL0000011900	ENSDARG00000068820	0.737158	1	4.11788e-07	0.0113238	0.317	0.295
prss59.2	LL0000022709	ENSDARG00000073742	0.921647	2	3.01255e-150	8.2842e-146	0.948	0.892
prss1	LL0000022702	ENSDARG00000042993	0.876693	2	1.50494e-145	4.13842e-141	0.938	0.881
CELA1-1-of-many	LL0000005414	ENSDARG00000095462	0.940609	2	1.76589e-137	4.85601e-133	0.924	0.837
ctrb1	LL0000007751	ENSDARG00000090428	0.852617	2	2.54158e-133	6.9891e-129	0.922	0.873
prss59.1	LL0000022708	ENSDARG00000079274	0.881292	2	1.93981e-115	5.33429e-111	0.884	0.794
ela2l	LL0000009545	ENSDARG00000056765	0.847888	2	2.2045e-75	6.06215e-71	0.759	0.646
mt-co2	LL0000019669	ENSDARG00000063908	0.50022	2	4.74728e-64	1.30545e-59	0.989	0.994
ela2	LL0000009544	ENSDARG00000056744	0.887209	2	5.23643e-64	1.43997e-59	0.701	0.572
COX3	LL0000006102	ENSDARG00000063912	0.504234	2	1.79599e-54	4.9388e-50	0.991	0.987
apoda.2	LL0000001190	ENSDARG00000060350	0.810013	2	1.80854e-49	4.97331e-45	0.653	0.543
zgc:112160	LL0000038541	ENSDARG00000039730	0.871515	2	7.65319e-49	2.10455e-44	0.632	0.514
CR383676.1	LL0000006421	ENSDARG00000099970	0.670238	2	4.66177e-45	1.28194e-40	1	0.999
ATP6	LL0000001622	ENSDARG00000063911	0.579178	2	1.24298e-38	3.41807e-34	0.938	0.968
ela3l	LL0000009546	ENSDARG00000007276	0.782701	2	1.36432e-38	3.75175e-34	0.616	0.533
NC-002333.4	LL0000020031	ENSDARG00000080337	0.567666	2	3.82644e-38	1.05223e-33	0.897	0.939
ctrl	LL0000007752	ENSDARG00000068680	0.814541	2	4.86412e-38	1.33759e-33	0.59	0.493
zgc:136461	LL0000038669	ENSDARG00000093844	0.775458	2	8.05346e-34	2.21462e-29	0.567	0.473
gpm6ab	LL0000011572	ENSDARG00000004621	1.33517	2	1.78901e-33	4.91959e-29	0.422	0.247
gpm6aa	LL0000011571	ENSDARG00000055455	1.23625	2	1.04753e-32	2.88061e-28	0.431	0.258
rtn1b	LL0000024078	ENSDARG00000021143	1.28651	2	2.68661e-31	7.3879e-27	0.259	0.111
nsg2	LL0000020653	ENSDARG00000102975	1.01858	2	3.81395e-28	1.0488e-23	0.276	0.129
marcksl1b	LL0000018676	ENSDARG00000035715	0.807809	2	1.21117e-27	3.33059e-23	0.588	0.489
cpa5	LL0000006127	ENSDARG00000021339	0.718987	2	5.52715e-27	1.51991e-22	0.453	0.323
rtn1a	LL0000024077	ENSDARG00000006497	1.31536	2	3.16233e-25	8.69608e-21	0.394	0.259
ND4	LL0000020081	ENSDARG00000063917	0.530598	2	3.32001e-24	9.12969e-20	0.769	0.845
c6ast4	LL0000003930	ENSDARG00000052578	0.765524	2	9.65501e-20	2.65503e-15	0.409	0.304
opn1sw1	LL0000020898	ENSDARG00000045677	1.06258	2	4.04704e-17	1.1129e-12	0.468	0.408
sycn.2	LL0000029728	ENSDARG00000103687	0.746411	2	2.25931e-16	6.21289e-12	0.384	0.29
si:dkey-14d8.6	LL0000026765	ENSDARG00000045835	0.712875	2	1.25113e-14	3.44048e-10	0.416	0.345
sox4a	LL0000029196	ENSDARG00000096389	1.09573	2	4.57041e-14	1.25682e-09	0.272	0.175
sncb	LL0000029053	ENSDARG00000104945	0.790036	2	1.85446e-11	5.09957e-07	0.265	0.176
ND3	LL0000020080	ENSDARG00000063914	0.544046	2	3.58785e-11	9.86623e-07	0.646	0.777
stmn1b	LL0000029570	ENSDARG00000033655	0.50845	2	1.42175e-09	3.90967e-05	0.384	0.307
tmeff1b	LL0000030438	ENSDARG00000056740	0.933725	2	2.06179e-09	5.66972e-05	0.252	0.182
tuba1c	LL0000031348	ENSDARG00000055216	0.720066	2	2.39743e-08	0.00065927	0.375	0.324
nova2	LL0000020494	ENSDARG00000017673	0.601605	2	7.91434e-07	0.0217637	0.299	0.245
tubb5	LL0000031360	ENSDARG00000037997	2.32558	3	0	0	0.716	0.085
islr2	LL0000012903	ENSDARG00000051875	2.19335	3	0	0	0.465	0.029
elavl3	LL0000009552	ENSDARG00000014420	2.18656	3	0	0	0.855	0.157
tmsb	LL0000030688	ENSDARG00000054911	1.99352	3	0	0	0.633	0.1
adcyap1b	LL0000000322	ENSDARG00000027740	1.79207	3	0	0	0.475	0.036
rtn1b	LL0000024078	ENSDARG00000021143	1.7381	3	0	0	0.633	0.094
stmn1b	LL0000029570	ENSDARG00000033655	1.85943	3	1.30875e-303	3.59894e-299	0.903	0.283
rtn1a	LL0000024077	ENSDARG00000006497	1.68759	3	2.57842e-302	7.0904e-298	0.875	0.237
cd99l2	LL0000005262	ENSDARG00000056722	1.6978	3	2.322e-298	6.38525e-294	0.519	0.068
nhlh2	LL0000020294	ENSDARG00000025495	1.51957	3	3.2162e-285	8.84423e-281	0.334	0.025
barhl2	LL0000001796	ENSDARG00000104361	1.89125	3	1.34527e-282	3.69935e-278	0.388	0.037
tmeff1b	LL0000030438	ENSDARG00000056740	1.63959	3	9.14991e-282	2.51613e-277	0.724	0.161
stmn2b	LL0000029572	ENSDARG00000070537	1.49614	3	9.86284e-262	2.71218e-257	0.392	0.041
gpm6aa	LL0000011571	ENSDARG00000055455	1.50537	3	2.59323e-257	7.13111e-253	0.853	0.238
tuba1c	LL0000031348	ENSDARG00000055216	1.8963	3	7.56173e-255	2.0794e-250	0.863	0.301
tuba1a	LL0000031346	ENSDARG00000001889	1.65173	3	1.29504e-251	3.56124e-247	0.736	0.185
zc4h2	LL0000038356	ENSDARG00000015314	1.63004	3	7.29628e-245	2.0064e-240	0.751	0.208
gpm6ab	LL0000011572	ENSDARG00000004621	1.81167	3	1.37261e-244	3.77454e-240	0.807	0.23
gng3	LL0000011473	ENSDARG00000009553	1.4214	3	1.67145e-232	4.59632e-228	0.589	0.113
lhx9	LL0000013659	ENSDARG00000056979	1.73213	3	7.20626e-226	1.98165e-221	0.388	0.048
gap43	LL0000011137	ENSDARG00000099744	1.36442	3	2.40095e-220	6.60237e-216	0.361	0.041
sox11b	LL0000029180	ENSDARG00000095743	1.85651	3	5.49081e-206	1.50992e-201	0.568	0.126
mllt11	LL0000019371	ENSDARG00000071026	1.30654	3	4.7623e-204	1.30959e-199	0.427	0.065
nrn1a	LL0000020626	ENSDARG00000071860	1.06709	3	1.13588e-197	3.12355e-193	0.293	0.029
marcksb	LL0000018674	ENSDARG00000008803	1.42227	3	3.90323e-194	1.07335e-189	0.68	0.196
ptmaa	LL0000022859	ENSDARG00000021113	1.28255	3	1.08902e-192	2.99469e-188	0.979	0.742
marcksl1b	LL0000018676	ENSDARG00000035715	1.32683	3	2.89866e-189	7.97102e-185	0.921	0.473
nova2	LL0000020494	ENSDARG00000017673	1.33452	3	5.97845e-189	1.64402e-184	0.73	0.225
si:dkey-12h9.6	LL0000026728	ENSDARG00000056092	1.11215	3	8.11843e-189	2.23249e-184	0.268	0.025
hmgb1b	LL0000012169	ENSDARG00000030479	1.37227	3	6.57495e-188	1.80804e-183	0.876	0.418
marcksa	LL0000018673	ENSDARG00000004049	1.27695	3	3.1472e-187	8.65448e-183	0.533	0.114
fez1	LL0000010267	ENSDARG00000023174	1.1345	3	2.1676e-182	5.96068e-178	0.527	0.109
hmgb3a	LL0000012172	ENSDARG00000056725	1.55095	3	4.90094e-179	1.34771e-174	0.84	0.421
tubb2b	LL0000031358	ENSDARG00000098591	1.44905	3	2.21815e-177	6.09968e-173	0.83	0.358
gng2	LL0000011472	ENSDARG00000056831	1.25201	3	1.44944e-167	3.9858e-163	0.49	0.106
nsg2	LL0000020653	ENSDARG00000102975	1.14849	3	3.99287e-167	1.098e-162	0.533	0.117
cirbpb	LL0000005709	ENSDARG00000013351	1.07971	3	4.27006e-167	1.17422e-162	0.958	0.831
si:dkey-56m19.5	LL0000027754	ENSDARG00000068432	1.37495	3	1.51306e-164	4.16076e-160	0.575	0.156
stmn2a	LL0000029571	ENSDARG00000033234	1.11348	3	6.91758e-159	1.90226e-154	0.311	0.042
h3f3d	LL0000011908	ENSDARG00000045248	0.960648	3	1.07368e-158	2.95251e-154	0.948	0.893
si:dkey-276j7.1	LL0000027465	ENSDARG00000090872	1.3527	3	9.6481e-157	2.65313e-152	0.593	0.177
tuba2	LL0000031349	ENSDARG00000045014	0.957298	3	1.33086e-152	3.65974e-148	0.268	0.032
ebf3a	LL0000039792	ENSDARG00000100244	1.72257	3	1.51253e-150	4.15931e-146	0.463	0.108
ctnnbip1	LL0000007742	ENSDARG00000038954	1.48331	3	5.08197e-150	1.39749e-145	0.454	0.103
dpysl3	LL0000009183	ENSDARG00000002587	1.02633	3	9.80465e-147	2.69618e-142	0.346	0.057
ptmab	LL0000022860	ENSDARG00000101766	1.04625	3	1.61149e-146	4.43143e-142	0.967	0.849
sox4a	LL0000029196	ENSDARG00000096389	1.45999	3	5.48804e-146	1.50916e-141	0.566	0.161
hnrnpa0a	LL0000012203	ENSDARG00000089302	1.37577	3	5.84267e-146	1.60668e-141	0.664	0.248
fscn1a	LL0000010884	ENSDARG00000059680	1.16457	3	3.07234e-145	8.44862e-141	0.444	0.099
chd4a	LL0000005573	ENSDARG00000063535	1.3156	3	1.77629e-144	4.88462e-140	0.465	0.112
lmo3	LL0000013736	ENSDARG00000008720	1.87366	3	9.03987e-142	2.48587e-137	0.344	0.06
sox11a	LL0000029179	ENSDARG00000077811	1.71022	3	1.11476e-141	3.06548e-137	0.531	0.152
si:ch211-222l21.1	LL0000025644	ENSDARG00000076532	1.21918	3	1.17733e-141	3.23753e-137	0.855	0.481
nat8l	LL0000020000	ENSDARG00000077256	1.04626	3	1.69943e-139	4.67326e-135	0.274	0.037
hnrnpaba	LL0000012209	ENSDARG00000007960	1.15278	3	4.31246e-137	1.18588e-132	0.88	0.694
zgc:101840	LL0000038469	ENSDARG00000033201	0.818775	3	1.05455e-135	2.8999e-131	0.276	0.038
elavl4	LL0000009553	ENSDARG00000045639	1.38339	3	2.18541e-133	6.00965e-129	0.405	0.085
hmgn6	LL0000012181	ENSDARG00000087636	1.1808	3	5.70988e-133	1.57016e-128	0.876	0.672
myt1b	LL0000019922	ENSDARG00000102879	0.976019	3	8.2087e-131	2.25731e-126	0.336	0.059
celf3a	LL0000005417	ENSDARG00000034668	0.931464	3	1.08005e-130	2.97004e-126	0.353	0.065
FO082781.1	LL0000010452	ENSDARG00000076638	1.26846	3	8.04318e-130	2.2118e-125	0.459	0.119
h2afx1	LL0000011903	ENSDARG00000068995	1.21325	3	1.22055e-122	3.35638e-118	0.836	0.558
sncb	LL0000029053	ENSDARG00000104945	1.2508	3	2.19107e-121	6.02523e-117	0.535	0.163
khdrbs1a	LL0000013267	ENSDARG00000052856	1.06672	3	2.83954e-120	7.80846e-116	0.861	0.648
pou3f1	LL0000022333	ENSDARG00000009823	1.4936	3	2.90892e-118	7.99924e-114	0.332	0.066
h3f3c	LL0000011907	ENSDARG00000033009	0.958984	3	1.77718e-117	4.88707e-113	0.89	0.732
rgmb	LL0000023593	ENSDARG00000079323	1.18048	3	2.43419e-117	6.69378e-113	0.338	0.069
mbd3b	LL0000018722	ENSDARG00000061810	1.02971	3	4.51979e-117	1.2429e-112	0.467	0.127
hp1bp3	LL0000012290	ENSDARG00000044669	1.14883	3	2.94277e-115	8.09231e-111	0.676	0.31
si:ch211-288g17.3	LL0000026030	ENSDARG00000070959	1.13855	3	2.00482e-106	5.51305e-102	0.693	0.338
ywhah	LL0000038282	ENSDARG00000005560	1.15652	3	2.28354e-101	6.2795e-97	0.554	0.211
mex3b	LL0000018918	ENSDARG00000058369	1.02506	3	6.7569e-101	1.85808e-96	0.386	0.101
hnrnpa0l	LL0000039827	ENSDARG00000036161	0.92044	3	1.63271e-100	4.4898e-96	0.849	0.714
mab21l1	LL0000018506	ENSDARG00000102047	1.27872	3	2.68127e-99	7.37323e-95	0.38	0.101
tmsb2	LL0000030690	ENSDARG00000092970	0.989889	3	1.19142e-98	3.27628e-94	0.28	0.054
cdk5r1b	LL0000005365	ENSDARG00000045087	0.839999	3	1.44156e-98	3.96416e-94	0.253	0.043
ssbp3b	LL0000029420	ENSDARG00000030155	1.06797	3	2.91356e-96	8.01199e-92	0.432	0.133
dpysl2b	LL0000009182	ENSDARG00000032083	0.895941	3	1.43485e-93	3.94568e-89	0.353	0.089
pou3f3b	LL0000022337	ENSDARG00000095896	0.974818	3	2.52791e-92	6.95149e-88	0.251	0.047
hmgb1a	LL0000012168	ENSDARG00000099175	0.925373	3	3.05115e-92	8.39034e-88	0.79	0.485
smarce1	LL0000028959	ENSDARG00000016871	1.04592	3	1.10349e-91	3.0345e-87	0.612	0.285
csdc2a	LL0000007420	ENSDARG00000041323	0.785005	3	4.30212e-89	1.18304e-84	0.257	0.049
nfil3-5	LL0000020260	ENSDARG00000094965	0.829249	3	2.68524e-88	7.38413e-84	0.253	0.049
cfl1	LL0000005532	ENSDARG00000021124	0.88431	3	3.12262e-88	8.58688e-84	0.84	0.68
si:dkeyp-75h12.5	LL0000028256	ENSDARG00000089877	0.992631	3	2.02963e-86	5.58128e-82	0.421	0.133
hdac1	LL0000011987	ENSDARG00000015427	1.0696	3	2.61486e-86	7.1906e-82	0.61	0.301
nkain1	LL0000020354	ENSDARG00000006859	0.884083	3	4.2527e-86	1.16945e-81	0.324	0.082
celf2	LL0000005416	ENSDARG00000002131	1.17298	3	4.64822e-86	1.27821e-81	0.645	0.352
rcc2	LL0000023346	ENSDARG00000011510	1.0918	3	6.1892e-85	1.70197e-80	0.454	0.163
tmem59l	LL0000030634	ENSDARG00000003655	0.937275	3	5.56069e-84	1.52913e-79	0.27	0.057
coro1cb	LL0000006085	ENSDARG00000021193	0.803286	3	7.20338e-84	1.98086e-79	0.263	0.055
h3f3a	LL0000039823	ENSDARG00000020504	0.773606	3	7.64143e-84	2.10132e-79	0.801	0.573
snap25a	LL0000029040	ENSDARG00000020609	0.815003	3	1.53571e-83	4.22304e-79	0.257	0.051
sumo3a	LL0000029678	ENSDARG00000028119	1.0115	3	4.72498e-82	1.29932e-77	0.703	0.442
cirbpa	LL0000005708	ENSDARG00000103672	0.76359	3	5.99062e-81	1.64736e-76	0.849	0.664
si:ch73-1a9.3	LL0000026297	ENSDARG00000103919	0.637612	3	1.08416e-79	2.98133e-75	0.915	0.835
insm1a	LL0000012790	ENSDARG00000091756	1.06004	3	4.58955e-79	1.26208e-74	0.257	0.055
tmed4	LL0000030431	ENSDARG00000024954	0.790552	3	8.98624e-79	2.47113e-74	0.28	0.065
cbx1b	LL0000004996	ENSDARG00000054442	0.992273	3	1.67798e-78	4.61426e-74	0.375	0.115
fam168a	LL0000010014	ENSDARG00000098832	1.00149	3	2.1884e-75	6.01788e-71	0.568	0.268
bcl7a	LL0000001851	ENSDARG00000052907	0.872888	3	3.5245e-74	9.69201e-70	0.334	0.096
hnrnpa0b	LL0000012204	ENSDARG00000036162	0.960802	3	8.65581e-73	2.38026e-68	0.722	0.504
nucks1a	LL0000020711	ENSDARG00000078473	0.986875	3	1.01607e-70	2.79409e-66	0.598	0.321
hsp90ab1	LL0000012371	ENSDARG00000029150	0.508789	3	5.36043e-70	1.47407e-65	0.971	0.912
hmgb2b	LL0000012171	ENSDARG00000053990	0.709337	3	9.23555e-69	2.53968e-64	0.772	0.532
gnao1a	LL0000011449	ENSDARG00000016676	0.75248	3	3.96476e-68	1.09027e-63	0.299	0.081
epb41a	LL0000009686	ENSDARG00000099283	0.713417	3	2.03519e-67	5.59656e-63	0.467	0.173
si:ch211-51e12.7	LL0000026057	ENSDARG00000045914	0.949561	3	2.85108e-66	7.84019e-62	0.531	0.261
ywhag2	LL0000038281	ENSDARG00000071658	0.898739	3	4.67761e-66	1.2863e-61	0.307	0.087
hnrnpr	LL0000012221	ENSDARG00000014569	0.971493	3	1.49843e-65	4.12052e-61	0.446	0.186
cdkn1ca	LL0000005381	ENSDARG00000010878	0.837854	3	4.46818e-65	1.22871e-60	0.255	0.064
cnp	LL0000005923	ENSDARG00000070822	0.916604	3	1.43855e-63	3.95588e-59	0.349	0.121
gatad2b	LL0000011168	ENSDARG00000005834	0.891617	3	9.74377e-63	2.67944e-58	0.415	0.162
ing4	LL0000012749	ENSDARG00000030716	0.92126	3	5.84647e-60	1.60772e-55	0.444	0.195
fkbp1aa	LL0000010373	ENSDARG00000022684	0.665222	3	4.29278e-59	1.18047e-54	0.803	0.69
hnrnpabb	LL0000012210	ENSDARG00000099865	0.886128	3	1.15112e-58	3.16546e-54	0.662	0.456
kdm6bb	LL0000013255	ENSDARG00000056929	0.85165	3	1.75774e-58	4.83361e-54	0.313	0.101
tspan7b	LL0000031261	ENSDARG00000008407	0.700046	3	4.04724e-56	1.11295e-51	0.295	0.088
sumo2b	LL0000029677	ENSDARG00000102741	0.827447	3	1.5202e-55	4.1804e-51	0.712	0.551
g3bp2	LL0000011038	ENSDARG00000014790	0.744607	3	1.6784e-54	4.61542e-50	0.266	0.079
ube2d4	LL0000031471	ENSDARG00000015057	0.764915	3	2.73235e-54	7.5137e-50	0.284	0.089
calm3b	LL0000004820	ENSDARG00000074057	0.774798	3	6.47112e-54	1.77949e-49	0.708	0.527
si:dkey-56f14.7	LL0000027745	ENSDARG00000055400	0.551187	3	1.77763e-53	4.88831e-49	0.264	0.074
pbx3b	LL0000021345	ENSDARG00000013615	1.23097	3	9.83929e-53	2.70571e-48	0.311	0.109
rbm4.3	LL0000023298	ENSDARG00000022129	0.841428	3	7.87724e-51	2.16616e-46	0.602	0.398
neurod1	LL0000020224	ENSDARG00000019566	1.4061	3	4.0628e-50	1.11723e-45	0.303	0.104
jpt1b	LL0000013041	ENSDARG00000099312	0.866729	3	2.72076e-49	7.48183e-45	0.471	0.241
hmga1a	LL0000012165	ENSDARG00000028335	0.537765	3	6.15801e-49	1.69339e-44	0.741	0.539
tardbp	LL0000029965	ENSDARG00000040031	0.799636	3	2.19843e-48	6.04546e-44	0.357	0.147
ilf2	LL0000012693	ENSDARG00000014591	0.879043	3	3.19502e-48	8.78598e-44	0.456	0.231
ewsr1a	LL0000009858	ENSDARG00000020258	0.779394	3	4.24173e-48	1.16643e-43	0.347	0.14
ywhabl	LL0000038277	ENSDARG00000040287	0.750739	3	6.32537e-47	1.73941e-42	0.658	0.476
oaz1b	LL0000020797	ENSDARG00000104782	0.711819	3	3.75276e-46	1.03197e-41	0.67	0.507
ptp4a1	LL0000022862	ENSDARG00000006242	0.802309	3	1.27423e-45	3.50402e-41	0.504	0.288
ilf3b	LL0000012695	ENSDARG00000105177	0.849117	3	3.34064e-45	9.18642e-41	0.38	0.171
tmpob	LL0000030674	ENSDARG00000022978	0.731375	3	4.44271e-45	1.2217e-40	0.311	0.117
rbfox2	LL0000023264	ENSDARG00000052182	0.814984	3	1.02757e-44	2.82572e-40	0.332	0.137
mapre1b	LL0000018656	ENSDARG00000002659	0.692663	3	1.57912e-44	4.34243e-40	0.288	0.104
pop7	LL0000022320	ENSDARG00000036394	0.710779	3	7.49184e-44	2.06018e-39	0.28	0.101
appa	LL0000001201	ENSDARG00000104279	0.76393	3	8.54404e-44	2.34953e-39	0.407	0.19
ywhae1	LL0000038278	ENSDARG00000006399	0.791348	3	9.1773e-44	2.52366e-39	0.589	0.412
hmgn7	LL0000012182	ENSDARG00000062326	0.520783	3	1.24465e-43	3.42265e-39	0.79	0.696
calr	LL0000004825	ENSDARG00000076290	1.00456	3	3.19098e-43	8.77488e-39	0.369	0.168
dnaja2b	LL0000009041	ENSDARG00000010745	0.684562	3	4.38052e-42	1.2046e-37	0.322	0.132
ubc	LL0000031461	ENSDARG00000102632	0.615398	3	8.261e-42	2.27169e-37	0.757	0.667
syncrip	LL0000029743	ENSDARG00000040184	0.814134	3	4.25019e-40	1.16876e-35	0.589	0.425
atrx	LL0000001672	ENSDARG00000042236	0.797234	3	1.70982e-39	4.70182e-35	0.363	0.172
cxxc5a	LL0000008510	ENSDARG00000078865	0.798242	3	7.09338e-39	1.95061e-34	0.278	0.108
actl6a	LL0000000224	ENSDARG00000070828	0.681833	3	1.68795e-38	4.64169e-34	0.282	0.112
kdm1a	LL0000013238	ENSDARG00000060679	0.792429	3	4.15856e-38	1.14356e-33	0.384	0.191
marcksl1a	LL0000018675	ENSDARG00000039034	0.651607	3	5.14232e-38	1.41409e-33	0.571	0.36
olfm1b	LL0000020861	ENSDARG00000014053	0.624756	3	6.14073e-38	1.68864e-33	0.257	0.089
h2afvb	LL0000011901	ENSDARG00000116491	0.682322	3	9.31834e-37	2.56245e-32	0.651	0.499
hnrnpl	LL0000012218	ENSDARG00000035324	0.728136	3	2.45042e-36	6.73841e-32	0.255	0.097
sinhcafl	LL0000028422	ENSDARG00000095007	0.668993	3	2.06845e-35	5.68802e-31	0.402	0.205
hnrnpa1a	LL0000012206	ENSDARG00000011020	0.717636	3	1.44485e-34	3.97319e-30	0.365	0.185
si:ch211-137a8.4	LL0000025074	ENSDARG00000078748	0.637301	3	1.52234e-34	4.18628e-30	0.376	0.176
pbx1a	LL0000021341	ENSDARG00000100494	0.727882	3	5.74006e-34	1.57846e-29	0.264	0.104
h2afy2	LL0000011905	ENSDARG00000087897	0.750684	3	8.25957e-34	2.2713e-29	0.533	0.371
rbbp4	LL0000023255	ENSDARG00000029058	0.760078	3	2.34694e-33	6.45385e-29	0.295	0.128
hnrnph1l	LL0000012215	ENSDARG00000005551	0.688129	3	3.58504e-33	9.85849e-29	0.319	0.148
LEPROTL1	LL0000013606	ENSDARG00000104871	0.715934	3	6.43382e-33	1.76924e-28	0.375	0.195
zfhx3	LL0000038414	ENSDARG00000103057	0.96612	3	6.70765e-33	1.84454e-28	0.272	0.117
gnb1b	LL0000011458	ENSDARG00000104372	0.55043	3	1.01367e-32	2.78749e-28	0.531	0.363
nfyba	LL0000020280	ENSDARG00000039185	0.692372	3	2.13288e-32	5.86519e-28	0.349	0.176
srsf9	LL0000029412	ENSDARG00000008097	0.711249	3	6.69755e-32	1.84176e-27	0.349	0.181
pak2b	LL0000021223	ENSDARG00000018476	0.676842	3	1.84975e-31	5.08664e-27	0.257	0.107
hnrnpc	LL0000012211	ENSDARG00000053810	0.686457	3	1.12426e-30	3.0916e-26	0.257	0.108
ube2e3	LL0000031474	ENSDARG00000012244	0.723103	3	4.2929e-30	1.18051e-25	0.486	0.332
si:ch1073-429i10.3.1	LL0000040151	ENSDARG00000068436	0.577423	3	5.04606e-30	1.38762e-25	0.635	0.514
hmgn3	LL0000012180	ENSDARG00000036754	0.694175	3	7.23632e-30	1.98992e-25	0.44	0.268
ctnnb1	LL0000007740	ENSDARG00000014571	1.007	3	1.22266e-29	3.36218e-25	0.471	0.333
nr2f1a	LL0000020582	ENSDARG00000052695	0.959905	3	5.90813e-29	1.62468e-24	0.274	0.122
tcea1	LL0000030066	ENSDARG00000003531	0.679694	3	6.80984e-29	1.87264e-24	0.338	0.177
bcl2l10	LL0000001843	ENSDARG00000026766	0.541692	3	6.82275e-29	1.87619e-24	0.282	0.125
srsf3b	LL0000029404	ENSDARG00000059360	0.676259	3	1.14068e-28	3.13677e-24	0.475	0.313
tubb4b	LL0000031359	ENSDARG00000002344	0.538393	3	1.25129e-28	3.44091e-24	0.764	0.702
fundc1	LL0000010992	ENSDARG00000040822	0.616792	3	2.68319e-28	7.37851e-24	0.299	0.144
h2afva	LL0000011900	ENSDARG00000068820	0.601984	3	1.01501e-27	2.79118e-23	0.459	0.288
nono	LL0000020468	ENSDARG00000020482	0.712758	3	1.1646e-27	3.20254e-23	0.375	0.214
hnrnpub	LL0000012223	ENSDARG00000004735	0.656893	3	2.66976e-27	7.34157e-23	0.261	0.118
brd3b	LL0000002002	ENSDARG00000100129	0.724532	3	2.76744e-27	7.61019e-23	0.326	0.173
rtn4b	LL0000024083	ENSDARG00000104347	0.556807	3	5.15266e-27	1.41693e-22	0.253	0.106
pbx4	LL0000021346	ENSDARG00000052150	0.760356	3	1.04953e-26	2.88611e-22	0.311	0.161
mlf2	LL0000019366	ENSDARG00000034616	0.654369	3	5.92417e-26	1.62909e-21	0.342	0.187
ldb1a	LL0000013573	ENSDARG00000010137	0.600923	3	3.82275e-25	1.05122e-20	0.255	0.117
ap3s2	LL0000001138	ENSDARG00000039882	0.594986	3	1.04446e-24	2.87216e-20	0.272	0.129
snrpb	LL0000029075	ENSDARG00000011125	0.537464	3	2.86845e-24	7.88794e-20	0.531	0.392
ube2e1	LL0000031472	ENSDARG00000116649	0.668429	3	3.40601e-24	9.3662e-20	0.357	0.212
rbfox1	LL0000023262	ENSDARG00000014746	0.822601	3	5.64129e-24	1.5513e-19	0.274	0.136
arf5	LL0000001240	ENSDARG00000070472	0.690671	3	5.90117e-23	1.62276e-18	0.423	0.289
serinc1	LL0000024488	ENSDARG00000009106	0.616749	3	6.90567e-23	1.89899e-18	0.454	0.299
calm2b	LL0000004818	ENSDARG00000015050	0.565149	3	8.89473e-23	2.44596e-18	0.67	0.581
smarcd1	LL0000028955	ENSDARG00000019004	0.582461	3	9.29303e-23	2.55549e-18	0.263	0.127
arl8a	LL0000001373	ENSDARG00000078686	0.664534	3	9.52941e-23	2.62049e-18	0.261	0.129
apex1	LL0000001162	ENSDARG00000045843	0.637591	3	1.34159e-22	3.68924e-18	0.301	0.163
zgc:110158	LL0000038500	ENSDARG00000056490	0.629273	3	1.51609e-22	4.1691e-18	0.303	0.161
setb	LL0000024528	ENSDARG00000003920	0.540567	3	1.6826e-22	4.62699e-18	0.577	0.462
si:ch211-133n4.4	LL0000025059	ENSDARG00000071224	0.671012	3	2.40592e-22	6.61603e-18	0.375	0.226
dynlrb1	LL0000009315	ENSDARG00000104233	0.602097	3	3.50342e-22	9.63405e-18	0.44	0.31
atf7ip	LL0000001532	ENSDARG00000069619	0.645448	3	7.31132e-22	2.01054e-17	0.336	0.198
ctbp1	LL0000007713	ENSDARG00000057007	0.583998	3	1.02427e-21	2.81664e-17	0.315	0.177
lsm6	LL0000018436	ENSDARG00000036995	0.669941	3	2.09363e-21	5.75727e-17	0.355	0.22
zfhx4	LL0000038415	ENSDARG00000075542	0.737048	3	2.26736e-21	6.23501e-17	0.272	0.138
ube2e2	LL0000031473	ENSDARG00000034670	0.662916	3	2.51054e-21	6.90373e-17	0.303	0.171
cbx3a	LL0000004998	ENSDARG00000003860	0.552807	3	1.55455e-20	4.27484e-16	0.456	0.327
rbm8a	LL0000023308	ENSDARG00000016516	0.574487	3	5.1825e-20	1.42514e-15	0.523	0.425
nudt21	LL0000020726	ENSDARG00000003153	0.562189	3	2.19136e-19	6.02601e-15	0.288	0.162
rnf44	LL0000023830	ENSDARG00000068582	0.670658	3	4.68318e-19	1.28783e-14	0.317	0.189
sfpq	LL0000024562	ENSDARG00000011564	0.554018	3	6.24332e-18	1.71685e-13	0.264	0.147
rsf1b.1	LL0000024051	ENSDARG00000093503	0.615492	3	1.68592e-17	4.63612e-13	0.259	0.143
seta	LL0000024527	ENSDARG00000031495	0.505603	3	2.25261e-17	6.19444e-13	0.514	0.409
rab11a	LL0000023013	ENSDARG00000041450	0.645586	3	3.42674e-17	9.42319e-13	0.276	0.163
ddx39aa	LL0000008781	ENSDARG00000006225	0.646762	3	4.01803e-17	1.10492e-12	0.34	0.226
cbx5	LL0000005001	ENSDARG00000061187	0.551741	3	5.31741e-17	1.46223e-12	0.432	0.318
hnrpkl	LL0000012227	ENSDARG00000007034	0.56409	3	8.04572e-17	2.21249e-12	0.272	0.157
bud31	LL0000002096	ENSDARG00000017084	0.529658	3	1.03039e-16	2.83347e-12	0.39	0.278
snrpf	LL0000029083	ENSDARG00000105037	0.531342	3	2.69559e-16	7.41261e-12	0.407	0.296
snrpd3l	LL0000029081	ENSDARG00000076283	0.614682	3	4.61367e-16	1.26871e-11	0.342	0.231
psmb7	LL0000022752	ENSDARG00000037962	0.552778	3	2.06302e-15	5.67309e-11	0.411	0.31
sap18	LL0000024197	ENSDARG00000057854	0.528665	3	3.04558e-15	8.37504e-11	0.39	0.29
psmb1	LL0000022741	ENSDARG00000009640	0.561703	3	3.63647e-15	9.99993e-11	0.382	0.282
sumo1	LL0000029675	ENSDARG00000044267	0.533247	3	6.58662e-15	1.81126e-10	0.378	0.279
si:dkey-28b4.7	LL0000027520	ENSDARG00000079632	0.554315	3	1.68149e-14	4.62394e-10	0.336	0.228
chd4b	LL0000005574	ENSDARG00000025789	0.633439	3	2.47774e-14	6.81353e-10	0.338	0.235
rbmx	LL0000023314	ENSDARG00000014244	0.508483	3	2.67081e-14	7.34445e-10	0.266	0.161
cpsf6	LL0000006171	ENSDARG00000018618	0.585265	3	4.37849e-14	1.20404e-09	0.276	0.176
psma3	LL0000022734	ENSDARG00000086618	0.548706	3	1.17324e-13	3.22628e-09	0.371	0.275
ddx39ab	LL0000008782	ENSDARG00000015111	0.555492	3	2.30005e-13	6.3249e-09	0.332	0.234
sf3b5	LL0000024557	ENSDARG00000016855	0.599914	3	3.07656e-13	8.46022e-09	0.305	0.21
sec11a	LL0000024365	ENSDARG00000008936	0.581902	3	1.35592e-12	3.72865e-08	0.261	0.166
hnrnpl2	LL0000012219	ENSDARG00000059303	0.545105	3	1.99757e-12	5.49311e-08	0.274	0.18
snrpd2	LL0000029079	ENSDARG00000040440	0.545381	3	2.09301e-12	5.75557e-08	0.384	0.297
elocb	LL0000009579	ENSDARG00000045359	0.512688	3	2.16888e-12	5.96421e-08	0.423	0.344
pfn2l	LL0000021645	ENSDARG00000012682	0.514394	3	3.6287e-12	9.97856e-08	0.411	0.33
tmed7	LL0000030434	ENSDARG00000046022	0.614087	3	4.08654e-12	1.12376e-07	0.359	0.272
smc1al	LL0000028961	ENSDARG00000058203	0.502591	3	5.82253e-12	1.60114e-07	0.305	0.21
mtdha	LL0000019683	ENSDARG00000014159	0.60173	3	9.20173e-12	2.53038e-07	0.268	0.178
ube2ib	LL0000031481	ENSDARG00000007438	0.624204	3	1.24244e-11	3.41658e-07	0.365	0.289
ube2v1	LL0000031498	ENSDARG00000041875	0.521307	3	5.62124e-11	1.54578e-06	0.384	0.313
ywhaz	LL0000038285	ENSDARG00000032575	0.538544	3	2.73982e-09	7.53424e-05	0.376	0.314
cct3	LL0000005211	ENSDARG00000016173	0.558511	3	5.46206e-09	0.000150201	0.396	0.343
cct5	LL0000005213	ENSDARG00000045399	0.510922	3	8.65548e-09	0.000238017	0.446	0.416
si:ch211-246m6.4	LL0000025812	ENSDARG00000042857	0.566995	3	1.39742e-08	0.000384277	0.261	0.183
cct2	LL0000005210	ENSDARG00000104674	0.546541	3	2.49504e-08	0.000686111	0.413	0.378
bzw1a	LL0000003869	ENSDARG00000010481	0.516601	3	4.68845e-08	0.00128928	0.288	0.217
ppp2cb	LL0000022459	ENSDARG00000099241	0.526261	3	9.19375e-08	0.00252819	0.313	0.252
hbbe2	LL0000011957	ENSDARG00000045143	5.23661	4	0	0	1	0.148
hbbe1.1	LL0000011956	ENSDARG00000113599	5.10492	4	0	0	1	0.369
hbae1.1	LL0000011950	ENSDARG00000089475	5.03169	4	0	0	1	0.194
hbae3	LL0000011952	ENSDARG00000079305	4.97628	4	0	0	1	0.199
hbae1.3	LL0000011951	ENSDARG00000089124	4.39491	4	0	0	0.991	0.064
si:ch211-250g4.3	LL0000025831	ENSDARG00000092945	3.78938	4	0	0	0.987	0.025
creg1	LL0000007296	ENSDARG00000105154	3.30555	4	0	0	0.991	0.137
cahz	LL0000004795	ENSDARG00000011166	3.27301	4	0	0	0.962	0.045
hbae5	LL0000011953	ENSDARG00000045142	2.85882	4	0	0	0.718	0.009
si:dkey-240n22.3	LL0000027317	ENSDARG00000095013	2.6248	4	0	0	0.485	0.005
MFAP4-1-of-many	LL0000018924	ENSDARG00000111491	2.48772	4	0	0	0.457	0.017
blvrb	LL0000001932	ENSDARG00000096829	2.26477	4	0	0	0.793	0.063
mibp	LL0000019006	ENSDARG00000101362	2.23738	4	0	0	0.865	0.084
gpx1a	LL0000011670	ENSDARG00000018146	2.19127	4	0	0	0.844	0.136
hemgn	LL0000012035	ENSDARG00000096667	2.10735	4	0	0	0.694	0.012
nt5c2l1	LL0000020673	ENSDARG00000034852	2.07632	4	0	0	0.697	0.012
si:ch211-207c6.2	LL0000025496	ENSDARG00000095304	1.78322	4	0	0	0.453	0.007
alas2	LL0000000858	ENSDARG00000038643	1.74371	4	0	0	0.551	0.008
zgc:56095	LL0000039165	ENSDARG00000018461	1.68214	4	0	0	0.707	0.122
slc4a1a	LL0000028797	ENSDARG00000012881	1.52449	4	0	0	0.455	0.01
zgc:163057	LL0000038871	ENSDARG00000045144	1.38882	4	0	0	0.429	0.005
lmo2	LL0000013735	ENSDARG00000095019	1.38352	4	0	0	0.459	0.022
si:ch211-227m13.1	LL0000025690	ENSDARG00000096917	1.33667	4	0	0	0.419	0.015
slc6a22.2	LL0000028843	ENSDARG00000001354	1.26981	4	0	0	0.353	0.013
dmtn	LL0000009014	ENSDARG00000013110	1.12726	4	0	0	0.397	0.031
nmt1b	LL0000020433	ENSDARG00000057206	1.05807	4	0	0	0.329	0.006
epb41b	LL0000009687	ENSDARG00000029019	0.994689	4	0	0	0.295	0.006
gp1bb	LL0000011528	ENSDARG00000074441	0.946134	4	0	0	0.271	0.005
TCIM-1-of-many	LL0000030090	ENSDARG00000076858	1.15685	4	1.0511e-304	2.89041e-300	0.35	0.023
fth1a	LL0000010903	ENSDARG00000015551	2.97637	4	4.56663e-292	1.25578e-287	0.998	0.723
prdx2	LL0000022533	ENSDARG00000025350	2.33834	4	4.64109e-287	1.27625e-282	0.996	0.613
mterf3	LL0000019687	ENSDARG00000003207	1.70884	4	9.71873e-280	2.67255e-275	0.459	0.053
faxdc2	LL0000010162	ENSDARG00000023820	1.28303	4	1.30358e-264	3.58472e-260	0.564	0.082
tspo	LL0000031266	ENSDARG00000026655	1.73254	4	5.80773e-245	1.59707e-240	0.791	0.233
eef2l2	LL0000009409	ENSDARG00000035256	1.28937	4	1.98563e-229	5.46029e-225	0.476	0.067
tmod4	LL0000030672	ENSDARG00000020890	1.05768	4	4.75384e-212	1.30726e-207	0.397	0.048
clic2	LL0000005798	ENSDARG00000010625	1.02395	4	8.63916e-200	2.37568e-195	0.429	0.06
XLOC-016167	LL0000034264		1.01404	4	5.206e-190	1.4316e-185	0.276	0.025
LOC101885776	LL0000015193		1.25805	4	2.87671e-178	7.91065e-174	0.395	0.061
aqp1a.1	LL0000001212	ENSDARG00000023713	0.587359	4	6.77748e-176	1.86374e-171	0.417	0.061
add2	LL0000000325	ENSDARG00000074581	0.810504	4	9.53949e-170	2.62327e-165	0.276	0.028
ccni	LL0000005177	ENSDARG00000068214	1.24739	4	2.07916e-143	5.71748e-139	0.897	0.562
tpd52l2b	LL0000030865	ENSDARG00000013655	1.27417	4	4.69879e-140	1.29212e-135	0.613	0.199
vdac2	LL0000031827	ENSDARG00000013623	1.14816	4	1.31534e-138	3.61706e-134	0.902	0.617
histh1l	LL0000012141	ENSDARG00000035519	1.00584	4	5.45264e-124	1.49942e-119	0.957	0.623
tsc22d2	LL0000031213	ENSDARG00000041839	1.22708	4	3.01974e-119	8.30399e-115	0.387	0.084
bloc1s6	LL0000001930	ENSDARG00000042933	1.25864	4	5.41264e-115	1.48842e-110	0.579	0.204
rhag	LL0000023629	ENSDARG00000019253	0.644189	4	5.04041e-103	1.38606e-98	0.412	0.096
purba	LL0000022937	ENSDARG00000068822	1.15398	4	2.72238e-93	7.48628e-89	0.485	0.161
fbxo32	LL0000010209	ENSDARG00000040277	0.894655	4	4.34539e-93	1.19494e-88	0.254	0.044
slc16a10	LL0000028502	ENSDARG00000020984	0.960888	4	2.38063e-88	6.54648e-84	0.412	0.119
mibp2	LL0000019007	ENSDARG00000101844	0.75964	4	2.28074e-72	6.27181e-68	0.921	0.72
bnip3lb	LL0000001971	ENSDARG00000028067	0.960628	4	8.99874e-71	2.47456e-66	0.417	0.144
tmem14ca	LL0000030486	ENSDARG00000110836	0.880043	4	1.37479e-65	3.78053e-61	0.368	0.121
mt2	LL0000019674	ENSDARG00000041623	1.25193	4	6.86984e-60	1.88914e-55	0.568	0.279
si:ch211-260e23.9	LL0000025887	ENSDARG00000102572	0.88133	4	5.15333e-59	1.41712e-54	0.543	0.261
arl6ip1	LL0000001367	ENSDARG00000054578	0.751228	4	6.16964e-57	1.69659e-52	0.652	0.375
gabarapa	LL0000011049	ENSDARG00000035557	0.884989	4	1.70406e-54	4.68599e-50	0.515	0.254
zgc:92606	LL0000039289	ENSDARG00000040971	0.856962	4	3.2079e-53	8.8214e-49	0.577	0.324
arrdc3a	LL0000001418	ENSDARG00000052690	0.781698	4	5.55892e-47	1.52865e-42	0.457	0.212
fam53b	LL0000010089	ENSDARG00000016156	0.738135	4	5.67229e-47	1.55982e-42	0.265	0.084
gabarapb	LL0000011050	ENSDARG00000052082	0.611016	4	3.55789e-46	9.78383e-42	0.84	0.685
ppp1r14bb	LL0000022423	ENSDARG00000030161	0.721739	4	2.39072e-42	6.57425e-38	0.288	0.102
selenoj	LL0000024400	ENSDARG00000087277	0.815921	4	9.17566e-42	2.52321e-37	0.38	0.17
ISCU-1-of-many	LL0000012894	ENSDARG00000035596	0.876947	4	3.29164e-41	9.05168e-37	0.468	0.258
mycbp	LL0000019807	ENSDARG00000091001	0.767975	4	5.02329e-39	1.38136e-34	0.318	0.131
prps1a	LL0000022673	ENSDARG00000015524	0.763397	4	1.03508e-38	2.84636e-34	0.382	0.18
tuba8l4	LL0000031355	ENSDARG00000006260	0.617495	4	1.88332e-38	5.17894e-34	0.62	0.404
castor2	LL0000004949	ENSDARG00000018985	0.721983	4	8.17728e-35	2.24867e-30	0.318	0.137
zfand5b	LL0000038411	ENSDARG00000002271	0.844576	4	7.46183e-34	2.05193e-29	0.447	0.248
mcl1a	LL0000018766	ENSDARG00000009779	0.509292	4	6.58358e-33	1.81042e-28	0.774	0.58
pik3ip1	LL0000021802	ENSDARG00000003281	0.57793	4	7.3431e-33	2.01928e-28	0.261	0.098
XLOC-043857	LL0000038090		0.700827	4	2.14852e-32	5.90821e-28	0.421	0.227
glrx5	LL0000011397	ENSDARG00000043665	0.661454	4	1.02983e-31	2.83194e-27	0.293	0.124
ap2m1a	LL0000001129	ENSDARG00000002790	0.646148	4	4.99432e-28	1.37339e-23	0.451	0.27
zgc:163080	LL0000038876	ENSDARG00000095157	0.724562	4	1.90494e-27	5.23839e-23	0.295	0.141
rnf10	LL0000023752	ENSDARG00000079687	0.620327	4	1.21895e-23	3.352e-19	0.427	0.265
edf1	LL0000009379	ENSDARG00000009950	0.57279	4	3.66212e-21	1.00705e-16	0.592	0.489
pfkfb4b	LL0000021636	ENSDARG00000029075	0.602699	4	9.52509e-21	2.61931e-16	0.536	0.393
h1fx	LL0000011897	ENSDARG00000054058	0.809133	4	2.12096e-18	5.83242e-14	0.504	0.359
ccng1	LL0000005174	ENSDARG00000076667	0.56846	4	4.76359e-18	1.30994e-13	0.549	0.445
lamtor4	LL0000013524	ENSDARG00000045542	0.610895	4	5.76608e-16	1.58561e-11	0.314	0.195
lamp1a	LL0000013517	ENSDARG00000100181	0.529124	4	8.94856e-16	2.46076e-11	0.278	0.156
nupr1a	LL0000020768	ENSDARG00000094300	0.579281	4	9.30814e-16	2.55964e-11	0.429	0.306
STMP1	LL0000029577	ENSDARG00000093058	0.576965	4	1.97779e-15	5.43873e-11	0.423	0.312
il10rb	LL0000012638	ENSDARG00000078042	0.585591	4	3.29481e-15	9.06039e-11	0.265	0.151
ypel5	LL0000038267	ENSDARG00000088929	0.548702	4	1.27944e-12	3.51834e-08	0.259	0.157
eif4ebp3	LL0000009528	ENSDARG00000054916	0.544173	4	6.39336e-11	1.75811e-06	0.449	0.358
icn2	LL0000012458	ENSDARG00000055514	4.13118	5	0	0	0.993	0.181
krt17	LL0000013459	ENSDARG00000094041	4.02491	5	0	0	0.956	0.213
cyt1	LL0000008630	ENSDARG00000092947	3.9589	5	0	0	0.996	0.497
cyt1l	LL0000008631	ENSDARG00000036832	3.89313	5	0	0	0.958	0.229
tcnbb	LL0000030096	ENSDARG00000091996	3.61894	5	0	0	0.921	0.067
wu:fb18f06	LL0000032127	ENSDARG00000097635	3.41957	5	0	0	0.998	0.141
si:ch211-195b11.3	LL0000025387	ENSDARG00000100582	3.28334	5	0	0	0.971	0.13
si:dkey-247k7.2	LL0000027345	ENSDARG00000103199	3.26758	5	0	0	0.985	0.041
zgc:111983	LL0000038531	ENSDARG00000006588	3.11597	5	0	0	0.967	0.043
si:ch211-207n23.2	LL0000025509	ENSDARG00000097157	3.11161	5	0	0	0.971	0.041
rhcga	LL0000023639	ENSDARG00000003203	3.0928	5	0	0	0.921	0.036
anxa1c	LL0000001103	ENSDARG00000104359	3.0464	5	0	0	0.965	0.049
zgc:193505	LL0000039084	ENSDARG00000093584	2.96575	5	0	0	0.974	0.057
icn	LL0000012457	ENSDARG00000009978	2.8856	5	0	0	0.991	0.364
rhcgl1	LL0000023641	ENSDARG00000007080	2.82408	5	0	0	0.787	0.025
si:dkeyp-1h4.6	LL0000028143	ENSDARG00000093936	2.80581	5	0	0	0.857	0.041
LOC100535170	LL0000014264		2.77939	5	0	0	0.648	0.026
cldne	LL0000005782	ENSDARG00000043128	2.73888	5	0	0	0.989	0.025
wu:fa03e10	LL0000032121		2.69407	5	0	0	0.82	0.045
cldnb	LL0000005777	ENSDARG00000009544	2.65995	5	0	0	0.996	0.088
mid1ip1a	LL0000019022	ENSDARG00000041051	2.62933	5	0	0	0.965	0.029
fut9d	LL0000011005	ENSDARG00000028098	2.42572	5	0	0	0.787	0.017
dhrs13a.2	LL0000008886	ENSDARG00000111240	2.40513	5	0	0	0.969	0.008
lye	LL0000018469		2.39003	5	0	0	0.967	0.017
foxq1a	LL0000010627	ENSDARG00000030896	2.33201	5	0	0	0.945	0.043
epcam	LL0000009697	ENSDARG00000040534	2.2694	5	0	0	1	0.136
anxa1a	LL0000001101	ENSDARG00000026726	2.25357	5	0	0	0.969	0.193
si:dkey-193p11.2	LL0000026980	ENSDARG00000096712	2.20738	5	0	0	0.516	0.024
scel	LL0000024275	ENSDARG00000034677	2.16654	5	0	0	0.905	0.019
epdl1	LL0000009699	ENSDARG00000076386	2.05782	5	0	0	0.93	0.059
apodb	LL0000001191	ENSDARG00000057437	2.04283	5	0	0	0.954	0.019
agr1	LL0000000476	ENSDARG00000060682	2.03037	5	0	0	0.866	0.014
fuca1.1	LL0000010988	ENSDARG00000035890	2.00996	5	0	0	0.912	0.063
cfl1l	LL0000005533	ENSDARG00000012972	2.00023	5	0	0	0.978	0.131
stard14	LL0000029509	ENSDARG00000031929	1.9929	5	0	0	0.96	0.02
pnp5a	LL0000022219	ENSDARG00000078619	1.95294	5	0	0	0.941	0.15
s100a10b	LL0000024145	ENSDARG00000025254	1.94646	5	0	0	0.989	0.185
spint2	LL0000029291	ENSDARG00000069476	1.94225	5	0	0	0.952	0.044
hrc	LL0000012314	ENSDARG00000109442	1.93617	5	0	0	0.956	0.042
abcb5	LL0000000038	ENSDARG00000021787	1.91085	5	0	0	0.912	0.014
tmem176l.4	LL0000030521	ENSDARG00000074390	1.89301	5	0	0	0.908	0.036
zgc:163030	LL0000038869	ENSDARG00000069192	1.85935	5	0	0	0.859	0.022
cd9b	LL0000005264	ENSDARG00000016691	1.80934	5	0	0	0.941	0.051
si:ch211-157c3.4	LL0000025200	ENSDARG00000087093	1.80468	5	0	0	0.837	0.012
rhbg	LL0000023638	ENSDARG00000009018	1.79992	5	0	0	0.721	0.05
elovl7b	LL0000009590	ENSDARG00000100185	1.76581	5	0	0	0.798	0.011
sec23b	LL0000024377	ENSDARG00000019360	1.72715	5	0	0	0.923	0.051
si:ch211-105c13.3	LL0000024885	ENSDARG00000089441	1.72424	5	0	0	0.919	0.088
pycard	LL0000022969	ENSDARG00000040076	1.71496	5	0	0	0.901	0.086
si:dkey-7c18.24	LL0000027913	ENSDARG00000041433	1.70176	5	0	0	0.253	0.008
LOC100535095	LL0000014258		1.68846	5	0	0	0.415	0.013
soul2	LL0000029168	ENSDARG00000039499	1.68161	5	0	0	0.857	0.013
CABZ01027551.1	LL0000004046	ENSDARG00000109561	1.6515	5	0	0	0.848	0.009
XLOC-001672	LL0000032399		1.62814	5	0	0	0.725	0.027
s100w	LL0000024153	ENSDARG00000101181	1.59839	5	0	0	0.851	0.021
si:dkey-87o1.2	LL0000027990	ENSDARG00000095796	1.58994	5	0	0	0.899	0.019
si:ch211-217k17.9	LL0000025609	ENSDARG00000093494	1.57036	5	0	0	0.829	0.01
ppl	LL0000022390	ENSDARG00000101043	1.528	5	0	0	0.824	0.019
stx11b.1	LL0000029608	ENSDARG00000029290	1.52532	5	0	0	0.842	0.011
zgc:153284	LL0000038720	ENSDARG00000036876	1.52529	5	0	0	0.87	0.026
si:ch211-125o16.4	LL0000025009	ENSDARG00000056836	1.52409	5	0	0	0.844	0.006
mgst1.2	LL0000018975	ENSDARG00000022165	1.51712	5	0	0	0.963	0.2
xkr8.2	LL0000032201	ENSDARG00000076820	1.50142	5	0	0	0.785	0.014
zgc:153932	LL0000038759	ENSDARG00000113315	1.45117	5	0	0	0.681	0.006
si:dkeyp-51b9.3	LL0000028203	ENSDARG00000092379	1.45095	5	0	0	0.833	0.007
ckap4	LL0000005723	ENSDARG00000032405	1.44775	5	0	0	0.868	0.05
zgc:153911	LL0000038755	ENSDARG00000002509	1.42594	5	0	0	0.721	0.02
krt96	LL0000013472	ENSDARG00000095147	1.42325	5	0	0	0.457	0.009
mhc1zba	LL0000018991	ENSDARG00000036588	1.42011	5	0	0	0.905	0.123
s100v1	LL0000024151	ENSDARG00000070427	1.4154	5	0	0	0.842	0.022
selenow2b	LL0000024417	ENSDARG00000089936	1.37436	5	0	0	0.826	0.018
cldn23a	LL0000005768	ENSDARG00000028096	1.34944	5	0	0	0.774	0.007
si:dkey-222n6.2	LL0000027184	ENSDARG00000034836	1.32338	5	0	0	0.826	0.005
XLOC-011066	LL0000033527		1.31798	5	0	0	0.589	0.006
si:ch73-204p21.2	LL0000026300	ENSDARG00000097902	1.31356	5	0	0	0.765	0.008
CU914622.2	LL0000008303	ENSDARG00000103634	1.29291	5	0	0	0.552	0.006
anxa2a	LL0000001104	ENSDARG00000003216	1.28601	5	0	0	0.895	0.095
zgc:92242	LL0000039276	ENSDARG00000029443	1.26648	5	0	0	0.853	0.087
zgc:110333	LL0000038511	ENSDARG00000040628	1.25675	5	0	0	0.829	0.008
prr13	LL0000022680	ENSDARG00000086216	1.23978	5	0	0	0.895	0.067
si:ch73-52f15.5	LL0000026560	ENSDARG00000095400	1.2309	5	0	0	0.756	0.006
elovl7a	LL0000009589	ENSDARG00000069279	1.2256	5	0	0	0.813	0.009
si:dkeyp-86h10.3	LL0000028299	ENSDARG00000095615	1.2186	5	0	0	0.644	0.008
si:dkey-184p9.7	LL0000026930	ENSDARG00000092726	1.21357	5	0	0	0.741	0.02
ponzr3	LL0000022313	ENSDARG00000088589	1.19314	5	0	0	0.312	0.005
cast	LL0000004947	ENSDARG00000058693	1.17891	5	0	0	0.888	0.097
cldn7b	LL0000005774	ENSDARG00000014047	1.16	5	0	0	0.769	0.028
caspb	LL0000004940	ENSDARG00000052039	1.15331	5	0	0	0.745	0.02
zgc:175088	LL0000039073	ENSDARG00000099306	1.14526	5	0	0	0.796	0.1
perp	LL0000021603	ENSDARG00000063572	1.14304	5	0	0	0.811	0.132
si:dkey-33i11.9	LL0000027605	ENSDARG00000102555	1.11679	5	0	0	0.815	0.042
nqo1	LL0000020564	ENSDARG00000010250	1.11257	5	0	0	0.8	0.046
evplb	LL0000009854	ENSDARG00000103459	1.10758	5	0	0	0.488	0.008
si:rp71-77l1.1	LL0000028358	ENSDARG00000097746	1.09327	5	0	0	0.651	0.016
plekhf1	LL0000022111	ENSDARG00000102435	1.08195	5	0	0	0.58	0.01
bicdl2l	LL0000001902	ENSDARG00000091669	1.07894	5	0	0	0.69	0.008
homer2	LL0000012230	ENSDARG00000059349	1.06914	5	0	0	0.791	0.038
ctss2.2	LL0000007769	ENSDARG00000013771	1.06617	5	0	0	0.793	0.025
CR854839.1	LL0000007089	ENSDARG00000097006	1.06456	5	0	0	0.76	0.008
si:dkey-202l22.6	LL0000027056	ENSDARG00000102364	1.0501	5	0	0	0.512	0.005
CABZ01051602.1	LL0000004174	ENSDARG00000103973	1.04582	5	0	0	0.541	0.007
arhgdig	LL0000001299	ENSDARG00000004034	1.01431	5	0	0	0.84	0.092
znf185	LL0000039566	ENSDARG00000103917	1.00426	5	0	0	0.699	0.01
si:ch211-166a6.5	LL0000025272	ENSDARG00000079745	1.00156	5	0	0	0.798	0.071
eevs	LL0000009412	ENSDARG00000087873	0.995702	5	0	0	0.629	0.024
si:ch211-212k18.7	LL0000025550	ENSDARG00000055504	0.988878	5	0	0	0.756	0.062
zyg11	LL0000039746	ENSDARG00000007737	0.97442	5	0	0	0.771	0.045
zgc:100868	LL0000038439	ENSDARG00000004748	0.974228	5	0	0	0.613	0.005
si:ch211-79k12.1	LL0000026147	ENSDARG00000079175	0.973733	5	0	0	0.745	0.012
vamp8	LL0000031794	ENSDARG00000024116	0.972289	5	0	0	0.749	0.029
hsd17b12a	LL0000012345	ENSDARG00000015709	0.953151	5	0	0	0.719	0.029
mat2aa	LL0000018701	ENSDARG00000040334	0.942801	5	0	0	0.785	0.127
klf3	LL0000013363	ENSDARG00000015495	0.930793	5	0	0	0.723	0.076
pkp3a	LL0000022041	ENSDARG00000051861	0.925094	5	0	0	0.723	0.029
LOC108190590	LL0000016838		0.921106	5	0	0	0.618	0.003
f11r.1	LL0000009905	ENSDARG00000017320	0.912598	5	0	0	0.798	0.062
si:dkey-204f11.64	LL0000027066	ENSDARG00000094695	0.910931	5	0	0	0.8	0.065
phlda2	LL0000021722	ENSDARG00000042874	0.909276	5	0	0	0.763	0.095
slc20a1b	LL0000028552	ENSDARG00000010641	0.898726	5	0	0	0.798	0.118
si:dkey-19b23.12	LL0000027013	ENSDARG00000100712	0.898326	5	0	0	0.495	0.01
si:dkey-221j11.3	LL0000027164	ENSDARG00000093304	0.890538	5	0	0	0.64	0.003
fbp1a	LL0000010173	ENSDARG00000021366	0.890013	5	0	0	0.82	0.142
aep1	LL0000000431	ENSDARG00000039099	0.888705	5	0	0	0.288	0.012
elf3	LL0000009557	ENSDARG00000077982	0.886488	5	0	0	0.499	0.016
XLOC-041945	LL0000037592		0.885305	5	0	0	0.604	0.004
capn2l	LL0000004882	ENSDARG00000034211	0.875608	5	0	0	0.648	0.013
tmem45b	LL0000030622	ENSDARG00000056239	0.874908	5	0	0	0.684	0.014
BX548046.2	LL0000003099	ENSDARG00000096270	0.87429	5	0	0	0.686	0.009
jupa	LL0000013049	ENSDARG00000070787	0.871161	5	0	0	0.807	0.098
si:ch73-347e22.8	LL0000026484	ENSDARG00000103322	0.867422	5	0	0	0.622	0.008
dsg2.1	LL0000009240	ENSDARG00000076945	0.866602	5	0	0	0.648	0.014
abca12	LL0000000026	ENSDARG00000074749	0.866013	5	0	0	0.602	0.007
capn9	LL0000004889	ENSDARG00000012341	0.862453	5	0	0	0.64	0.005
si:cabz01007794.1	LL0000024715	ENSDARG00000105590	0.854347	5	0	0	0.479	0.005
oclna	LL0000020808	ENSDARG00000005108	0.850617	5	0	0	0.692	0.027
evpla	LL0000009853	ENSDARG00000019808	0.843071	5	0	0	0.633	0.005
oclnb	LL0000020809	ENSDARG00000003091	0.833129	5	0	0	0.618	0.006
CU693379.1	LL0000008185	ENSDARG00000098777	0.83278	5	0	0	0.58	0.014
ptgs2b	LL0000022841	ENSDARG00000010276	0.82921	5	0	0	0.459	0.013
adgrf6	LL0000000354	ENSDARG00000091757	0.826277	5	0	0	0.554	0.005
mir203a	LL0000019176	ENSDARG00000081779	0.824656	5	0	0	0.47	0.002
egr2a	LL0000009457	ENSDARG00000044098	0.81853	5	0	0	0.576	0.037
ANXA1-1-of-many	LL0000001096	ENSDARG00000098481	0.816869	5	0	0	0.6	0.003
cmah	LL0000005849	ENSDARG00000057714	0.814876	5	0	0	0.607	0.011
spint1a	LL0000029289	ENSDARG00000102332	0.811424	5	0	0	0.701	0.044
paqr6	LL0000021271	ENSDARG00000041483	0.808849	5	0	0	0.708	0.045
slc14a2	LL0000028496	ENSDARG00000051914	0.805873	5	0	0	0.527	0.003
cyldb	LL0000008538	ENSDARG00000089724	0.801627	5	0	0	0.593	0.004
zgc:154054	LL0000038767	ENSDARG00000099923	0.797886	5	0	0	0.631	0.009
gbgt1l4	LL0000011190	ENSDARG00000068503	0.795176	5	0	0	0.587	0.007
tnks1bp1	LL0000030752	ENSDARG00000068760	0.787158	5	0	0	0.558	0.024
dusp5	LL0000009290	ENSDARG00000019307	0.786786	5	0	0	0.578	0.061
si:dkey-262k9.2	LL0000027422	ENSDARG00000098024	0.784921	5	0	0	0.655	0.045
ptgs2a	LL0000022840	ENSDARG00000004539	0.782729	5	0	0	0.508	0.049
si:ch211-98n17.5	LL0000026174	ENSDARG00000105641	0.779629	5	0	0	0.629	0.015
sh3d21	LL0000024636	ENSDARG00000099448	0.778396	5	0	0	0.624	0.03
cldnf	LL0000005783	ENSDARG00000043133	0.774964	5	0	0	0.6	0.006
cdh1	LL0000005314	ENSDARG00000102750	0.773387	5	0	0	0.589	0.039
ildr1a	LL0000012690	ENSDARG00000103929	0.76424	5	0	0	0.615	0.011
pof1b	LL0000022240	ENSDARG00000054060	0.763	5	0	0	0.626	0.025
cx30.3	LL0000008460	ENSDARG00000042707	0.762433	5	0	0	0.604	0.006
chmp4bb	LL0000005609	ENSDARG00000007323	0.755843	5	0	0	0.769	0.121
zgc:92313	LL0000039279	ENSDARG00000040513	0.754133	5	0	0	0.662	0.024
si:ch211-264f5.6	LL0000025910	ENSDARG00000079372	0.745289	5	0	0	0.571	0.022
tmem176l.3b	LL0000030520	ENSDARG00000096874	0.737735	5	0	0	0.58	0.004
naga	LL0000019961	ENSDARG00000099313	0.734123	5	0	0	0.613	0.042
gcnt4a	LL0000011221	ENSDARG00000035198	0.730388	5	0	0	0.609	0.027
si:ch73-31d8.2	LL0000026450	ENSDARG00000097239	0.713512	5	0	0	0.532	0.007
nmi	LL0000020424		0.70818	5	0	0	0.615	0.025
LOC407643	LL0000018107		0.707885	5	0	0	0.545	0.004
wu:fi04e12	LL0000032150	ENSDARG00000076673	0.701213	5	0	0	0.582	0.024
grhl1	LL0000011706	ENSDARG00000061391	0.686641	5	0	0	0.576	0.007
tlcd1	LL0000030353	ENSDARG00000002391	0.68246	5	0	0	0.598	0.014
myzap	LL0000019924	ENSDARG00000075017	0.679028	5	0	0	0.547	0.016
zgc:174938	LL0000039069	ENSDARG00000075622	0.67846	5	0	0	0.477	0.002
gmds	LL0000011418	ENSDARG00000026629	0.663349	5	0	0	0.576	0.044
sft2d2a	LL0000024571	ENSDARG00000070746	0.661275	5	0	0	0.547	0.002
cyb5r2	LL0000008522	ENSDARG00000051925	0.660755	5	0	0	0.563	0.017
XLOC-027129	LL0000035654		0.658923	5	0	0	0.525	0.003
ankrd22	LL0000001027	ENSDARG00000002298	0.656904	5	0	0	0.554	0.023
eps8l1a	LL0000009740	ENSDARG00000057984	0.650383	5	0	0	0.571	0.007
si:dkey-38p12.3	LL0000027626	ENSDARG00000061844	0.641918	5	0	0	0.604	0.026
elovl6l	LL0000009588	ENSDARG00000038639	0.636196	5	0	0	0.484	0.003
tmem238a	LL0000030576	ENSDARG00000093684	0.634814	5	0	0	0.62	0.041
itm2bb	LL0000012963	ENSDARG00000041505	0.634722	5	0	0	0.67	0.081
tmem30b	LL0000030606	ENSDARG00000054122	0.63425	5	0	0	0.554	0.012
arhgef5	LL0000001325		0.631489	5	0	0	0.593	0.038
ndufaf2	LL0000020127	ENSDARG00000069286	0.628629	5	0	0	0.569	0.058
zmp:0000001031	LL0000039354		0.6241	5	0	0	0.407	0.002
lmo7a	LL0000013739	ENSDARG00000004930	0.624018	5	0	0	0.556	0.035
psme1	LL0000022780	ENSDARG00000002165	0.623284	5	0	0	0.547	0.024
lpcat4	LL0000018296	ENSDARG00000035028	0.621363	5	0	0	0.503	0.006
si:dkeyp-11e3.1	LL0000028117	ENSDARG00000102058	0.620253	5	0	0	0.514	0.003
XLOC-019956	LL0000034785		0.617585	5	0	0	0.468	0.016
fam129aa	LL0000009979	ENSDARG00000042055	0.617332	5	0	0	0.519	0.003
mgll	LL0000018968	ENSDARG00000036820	0.617231	5	0	0	0.58	0.029
galnt7	LL0000011121	ENSDARG00000057303	0.616494	5	0	0	0.611	0.034
anxa3a	LL0000001106	ENSDARG00000009196	0.615165	5	0	0	0.53	0.006
fuca2	LL0000010990	ENSDARG00000044073	0.611503	5	0	0	0.666	0.07
si:ch1073-443f11.2	LL0000024857	ENSDARG00000105068	0.611272	5	0	0	0.571	0.019
prrg2	LL0000022694	ENSDARG00000087193	0.606951	5	0	0	0.554	0.018
si:ch73-329n5.1	LL0000026453	ENSDARG00000103650	0.605247	5	0	0	0.391	0.003
prkcdb	LL0000022590	ENSDARG00000070651	0.60436	5	0	0	0.527	0.023
il17rc	LL0000012661	ENSDARG00000099902	0.601005	5	0	0	0.527	0.004
gsnb	LL0000011802	ENSDARG00000045262	0.598703	5	0	0	0.512	0.012
cavin2a	LL0000004958	ENSDARG00000027611	0.598049	5	0	0	0.624	0.036
BX901957.1	LL0000003589	ENSDARG00000098363	0.595187	5	0	0	0.508	0.001
eppk1	LL0000009734	ENSDARG00000096359	0.59415	5	0	0	0.444	0.018
gpa33a	LL0000011530	ENSDARG00000100223	0.59119	5	0	0	0.593	0.027
elovl1a	LL0000009581	ENSDARG00000099960	0.589794	5	0	0	0.49	0.017
hsd11b1la	LL0000012340	ENSDARG00000071377	0.589313	5	0	0	0.536	0.019
si:dkey-16l2.20	LL0000026850	ENSDARG00000098191	0.587396	5	0	0	0.582	0.05
si:ch211-152p11.4	LL0000025165	ENSDARG00000079705	0.58361	5	0	0	0.499	0.016
foxq1b	LL0000010628	ENSDARG00000055395	0.581732	5	0	0	0.407	0.01
zgc:100829	LL0000038436	ENSDARG00000015557	0.581083	5	0	0	0.569	0.051
f2rl1.2	LL0000009914	ENSDARG00000077540	0.579509	5	0	0	0.442	0.019
dsc2l	LL0000009232	ENSDARG00000039677	0.579076	5	0	0	0.492	0.016
tspan37	LL0000031253	ENSDARG00000095090	0.573284	5	0	0	0.549	0.024
tmem54a	LL0000030629	ENSDARG00000059247	0.568316	5	0	0	0.525	0.014
dbnla	LL0000008691	ENSDARG00000008170	0.566997	5	0	0	0.488	0.003
erbb3a	LL0000009753	ENSDARG00000006202	0.566391	5	0	0	0.457	0.008
ezrb	LL0000009903	ENSDARG00000025091	0.564976	5	0	0	0.615	0.06
fut9b	LL0000011004	ENSDARG00000067524	0.564786	5	0	0	0.521	0.005
ca15c	LL0000003945	ENSDARG00000002259	0.560047	5	0	0	0.279	0.001
zgc:172075	LL0000038966	ENSDARG00000076146	0.558362	5	0	0	0.495	0.002
si:ch73-78o10.1	LL0000026580	ENSDARG00000089511	0.552942	5	0	0	0.484	0.002
ch25hl1.1	LL0000005547	ENSDARG00000039381	0.548208	5	0	0	0.435	0.003
ms4a17a.10	LL0000019613	ENSDARG00000095695	0.54752	5	0	0	0.473	0.019
anxa1b	LL0000001102	ENSDARG00000100095	0.546091	5	0	0	0.376	0.003
rnf183	LL0000023796	ENSDARG00000068851	0.543136	5	0	0	0.49	0.004
enosf1	LL0000009653	ENSDARG00000038359	0.541568	5	0	0	0.516	0.044
serpinb14	LL0000024501	ENSDARG00000091801	0.536769	5	0	0	0.462	0.025
gm2a	LL0000011416	ENSDARG00000088439	0.534851	5	0	0	0.587	0.064
esrp1	LL0000009811	ENSDARG00000011245	0.52879	5	0	0	0.497	0.01
CABZ01048956.1	LL0000004160	ENSDARG00000117474	0.528085	5	0	0	0.308	0.001
ftr83	LL0000010972	ENSDARG00000025403	0.52699	5	0	0	0.435	0.007
si:dkey-187j14.4	LL0000026937	ENSDARG00000053761	0.523217	5	0	0	0.402	0.001
styk1b	LL0000029638	ENSDARG00000041947	0.511774	5	0	0	0.481	0.005
tjp3	LL0000030347	ENSDARG00000002909	0.511566	5	0	0	0.455	0.017
arrdc1a	LL0000001415	ENSDARG00000068148	0.510441	5	0	0	0.431	0.007
gna14	LL0000011437	ENSDARG00000035178	0.507849	5	0	0	0.431	0.003
si:ch211-197e7.1	LL0000025417	ENSDARG00000095200	0.505295	5	0	0	0.407	0.002
egr3	LL0000009459	ENSDARG00000089156	0.50524	5	0	0	0.411	0.019
ponzr2	LL0000022312	ENSDARG00000088539	0.505203	5	0	0	0.402	0.001
si:dkey-184p18.2	LL0000026929	ENSDARG00000077407	0.504462	5	0	0	0.415	0.027
epas1a	LL0000009684	ENSDARG00000008697	0.502708	5	0	0	0.497	0.043
TSTD1	LL0000031277	ENSDARG00000071567	0.500474	5	0	0	0.492	0.038
chmp2bb	LL0000005606	ENSDARG00000002190	0.695522	5	1.07325e-304	2.95134e-300	0.776	0.124
abracl	LL0000000119	ENSDARG00000042876	0.572435	5	1.76036e-302	4.84082e-298	0.633	0.079
pmaip1	LL0000022192	ENSDARG00000089307	1.13503	5	1.63172e-297	4.48707e-293	0.743	0.121
tcima	LL0000030091	ENSDARG00000079497	0.97333	5	3.9709e-297	1.09196e-292	0.631	0.082
hebp2	LL0000012019	ENSDARG00000042630	0.714542	5	7.19402e-297	1.97828e-292	0.657	0.09
krt4	LL0000013464	ENSDARG00000017624	3.81024	5	5.42902e-296	1.49293e-291	1	0.614
midn	LL0000019026	ENSDARG00000018524	1.21312	5	6.22129e-295	1.71079e-290	0.919	0.209
selenow1	LL0000024415	ENSDARG00000035136	1.83912	5	1.11896e-289	3.07702e-285	1	0.474
krt5	LL0000013465	ENSDARG00000058371	2.16899	5	9.49849e-284	2.61199e-279	0.938	0.312
klf2b	LL0000013362	ENSDARG00000040432	0.634907	5	8.87026e-281	2.43923e-276	0.554	0.065
sqstm1	LL0000029351	ENSDARG00000075014	0.55734	5	7.90406e-277	2.17354e-272	0.697	0.104
s100v2	LL0000024152	ENSDARG00000070702	0.867371	5	1.28949e-264	3.54597e-260	0.857	0.175
btbd10b	LL0000002043	ENSDARG00000020252	0.660333	5	1.49848e-255	4.12067e-251	0.741	0.131
cst14b.1	LL0000007468	ENSDARG00000117133	1.03152	5	1.94226e-255	5.34102e-251	0.826	0.182
chmp1b	LL0000005603	ENSDARG00000099624	0.777951	5	1.76616e-246	4.85678e-242	0.842	0.18
nr4a1	LL0000020590	ENSDARG00000000796	0.75194	5	3.40616e-246	9.3666e-242	0.754	0.138
net1	LL0000020208	ENSDARG00000032765	0.745247	5	2.33984e-245	6.43432e-241	0.765	0.147
xiap	LL0000032189	ENSDARG00000016143	0.549138	5	1.15369e-243	3.17252e-239	0.664	0.108
klhl24b	LL0000013398	ENSDARG00000008275	0.531773	5	3.81989e-241	1.05043e-236	0.479	0.057
selenot2	LL0000024412	ENSDARG00000023220	0.671668	5	1.7152e-233	4.71664e-229	0.749	0.145
fosb	LL0000010567	ENSDARG00000055751	0.942769	5	1.48529e-229	4.08441e-225	0.824	0.182
capns1a	LL0000004890	ENSDARG00000035329	0.949276	5	1.31834e-225	3.62531e-221	0.84	0.214
pleca	LL0000022096	ENSDARG00000062590	0.59501	5	2.79102e-222	7.67503e-218	0.695	0.126
si:dkey-248g15.3	LL0000027349	ENSDARG00000097959	1.51761	5	2.02637e-220	5.57231e-216	0.376	0.039
krtt1c19e	LL0000013477	ENSDARG00000090268	1.53487	5	3.70615e-215	1.01915e-210	0.844	0.253
arl5c	LL0000001365	ENSDARG00000035719	0.622463	5	3.91821e-214	1.07747e-209	0.62	0.107
chac1	LL0000005551	ENSDARG00000070426	1.34764	5	7.94046e-213	2.18355e-208	0.996	0.554
rasgef1ba	LL0000023220	ENSDARG00000033614	0.538929	5	1.26626e-210	3.48209e-206	0.815	0.178
tmem59	LL0000030633	ENSDARG00000019033	0.6505	5	1.81961e-205	5.00375e-201	0.802	0.185
si:ch211-286b5.5	LL0000026022	ENSDARG00000096661	0.68365	5	2.07001e-203	5.69232e-199	0.822	0.201
chmp5b	LL0000005612	ENSDARG00000103718	0.567844	5	9.90129e-200	2.72276e-195	0.763	0.167
vps4b	LL0000031900	ENSDARG00000069175	0.566705	5	4.35722e-196	1.19819e-191	0.705	0.146
XLOC-044191	LL0000038171		1.23009	5	2.08889e-192	5.74424e-188	0.969	0.397
ubb	LL0000031460	ENSDARG00000093313	1.34393	5	2.50107e-191	6.87769e-187	0.974	0.455
reep3b	LL0000023384	ENSDARG00000004160	0.522159	5	6.73594e-191	1.85232e-186	0.615	0.115
ahnak	LL0000000495	ENSDARG00000061764	0.548079	5	1.86179e-187	5.11974e-183	0.73	0.155
si:ch73-335l21.4	LL0000026464	ENSDARG00000091234	0.907705	5	1.26126e-184	3.46833e-180	0.822	0.224
mcl1a	LL0000018766	ENSDARG00000009779	1.09963	5	5.95516e-184	1.63761e-179	0.991	0.571
tmsb1	LL0000030689	ENSDARG00000104181	1.35832	5	2.56324e-182	7.04864e-178	0.901	0.316
lgmn	LL0000013634	ENSDARG00000039150	0.560127	5	3.59869e-182	9.89604e-178	0.618	0.12
cst14a.2	LL0000007467	ENSDARG00000045352	0.965344	5	9.94059e-182	2.73356e-177	0.925	0.326
slc38a5b	LL0000028740	ENSDARG00000014587	0.76977	5	2.45401e-173	6.74828e-169	0.899	0.276
si:dkey-112e7.2	LL0000026656	ENSDARG00000099281	0.604857	5	4.52465e-170	1.24423e-165	0.785	0.207
b2ml	LL0000001711	ENSDARG00000015887	0.68518	5	1.14942e-167	3.16079e-163	0.886	0.267
cox17	LL0000006098	ENSDARG00000069920	0.826246	5	5.62603e-167	1.5471e-162	0.96	0.378
lgals3b	LL0000013618	ENSDARG00000044001	0.56158	5	3.09705e-161	8.51659e-157	0.736	0.184
ccng2	LL0000005175	ENSDARG00000017602	0.702871	5	3.4715e-160	9.54627e-156	0.813	0.232
capns1b	LL0000004891	ENSDARG00000013804	0.632925	5	7.69152e-157	2.11509e-152	0.78	0.213
zfand5a	LL0000038410	ENSDARG00000018898	0.602108	5	5.7163e-156	1.57193e-151	0.765	0.204
nfe2l2a	LL0000020251	ENSDARG00000042824	0.543699	5	5.98939e-154	1.64702e-149	0.793	0.215
rplp2	LL0000023942	ENSDARG00000101406	0.579814	5	1.60269e-153	4.40724e-149	1	0.939
prelid3b	LL0000022542	ENSDARG00000009505	0.809123	5	2.78596e-153	7.6611e-149	0.923	0.358
glrx	LL0000011394	ENSDARG00000028106	0.507209	5	7.63089e-149	2.09842e-144	0.736	0.196
hmgb3b	LL0000012173	ENSDARG00000006408	0.5413	5	3.11015e-146	8.5526e-142	0.769	0.22
cebpb	LL0000005407	ENSDARG00000042725	0.721586	5	3.68479e-145	1.01328e-140	0.895	0.303
nfkbiaa	LL0000020266	ENSDARG00000005481	0.56219	5	2.17732e-142	5.9874e-138	0.635	0.146
fxyd6l	LL0000011012	ENSDARG00000097057	0.736332	5	6.89673e-142	1.89653e-137	0.943	0.398
ctsla	LL0000007763	ENSDARG00000007836	0.890415	5	5.9956e-141	1.64873e-136	0.978	0.47
eef1a1l1	LL0000009394	ENSDARG00000020850	0.556005	5	2.892e-140	7.9527e-136	1	0.966
hdlbpa	LL0000012006	ENSDARG00000009830	0.630308	5	1.11122e-132	3.05574e-128	0.857	0.292
csrnp1b	LL0000007458	ENSDARG00000038429	0.540173	5	1.45903e-132	4.01218e-128	0.785	0.233
smdt1b	LL0000028973	ENSDARG00000098852	0.53438	5	1.873e-132	5.15055e-128	0.831	0.268
tdh	LL0000030109	ENSDARG00000002745	0.700776	5	8.36889e-132	2.30136e-127	0.921	0.362
glo1	LL0000011384	ENSDARG00000068978	0.637294	5	9.0967e-132	2.5015e-127	0.82	0.293
ier2b	LL0000012475	ENSDARG00000086881	0.829458	5	2.08556e-131	5.73507e-127	0.969	0.401
aldob	LL0000000884	ENSDARG00000053684	0.515152	5	7.46637e-131	2.05318e-126	0.976	0.491
btg2	LL0000002063	ENSDARG00000020298	0.797388	5	2.1551e-129	5.92631e-125	0.991	0.524
egr1	LL0000009456	ENSDARG00000037421	0.647864	5	1.79528e-121	4.93685e-117	0.84	0.282
ddit3	LL0000008759	ENSDARG00000059836	0.654156	5	2.29563e-119	6.31274e-115	0.714	0.211
krt97	LL0000013473	ENSDARG00000000212	2.99464	5	8.25983e-111	2.27137e-106	0.407	0.092
hspa8	LL0000012381	ENSDARG00000068992	0.539759	5	9.22801e-111	2.53761e-106	1	0.91
dusp1	LL0000009269	ENSDARG00000100515	0.575467	5	3.32275e-108	9.13724e-104	0.727	0.232
ywhabl	LL0000038277	ENSDARG00000040287	0.616896	5	1.3397e-105	3.68404e-101	0.943	0.465
tob1b	LL0000030801	ENSDARG00000021372	0.621641	5	6.42914e-99	1.76795e-94	0.941	0.49
zgc:56493	LL0000040303	ENSDARG00000031435	0.511018	5	8.291e-72	2.27994e-67	0.965	0.618
rps27l	LL0000023986	ENSDARG00000100513	0.547619	5	4.76357e-69	1.30993e-64	0.793	0.324
krt91	LL0000013467	ENSDARG00000036830	1.42012	5	2.56827e-47	7.06249e-43	0.769	0.446
krt15	LL0000013458	ENSDARG00000036840	1.05641	5	3.52282e-25	9.68741e-21	0.29	0.122
col2a1a	LL0000006005	ENSDARG00000069093	3.58148	6	0	0	0.93	0.065
otos	LL0000021122	ENSDARG00000108475	3.47936	6	0	0	0.681	0.023
matn4	LL0000018709	ENSDARG00000015947	3.14709	6	0	0	0.938	0.069
col9a3	LL0000006032	ENSDARG00000037845	2.90111	6	0	0	0.919	0.041
col9a1a	LL0000006029	ENSDARG00000073699	2.81636	6	0	0	0.961	0.048
cnmd	LL0000005897	ENSDARG00000100133	2.73677	6	0	0	0.913	0.081
col9a2	LL0000006031	ENSDARG00000024492	2.60543	6	0	0	0.95	0.047
col11a1a	LL0000005978	ENSDARG00000026165	2.27257	6	0	0	0.821	0.081
col2a1b	LL0000006006	ENSDARG00000011407	1.89152	6	0	0	0.868	0.137
epyc	LL0000009747	ENSDARG00000056950	1.8083	6	0	0	0.493	0.017
cthrc1a	LL0000007734	ENSDARG00000087198	1.78614	6	0	0	0.627	0.028
tgfbi	LL0000030228	ENSDARG00000071586	1.74337	6	0	0	0.768	0.096
ucmab	LL0000031551	ENSDARG00000005485	1.64163	6	0	0	0.541	0.032
col11a2	LL0000005980	ENSDARG00000012422	1.6274	6	0	0	0.529	0.018
fibina	LL0000010348	ENSDARG00000039949	1.57861	6	0	0	0.65	0.063
col11a1b	LL0000005979	ENSDARG00000009014	1.29185	6	0	0	0.669	0.076
crispld1b	LL0000007322	ENSDARG00000013293	1.14321	6	0	0	0.454	0.028
cpxm1a	LL0000006179	ENSDARG00000073716	0.851342	6	5.91532e-297	1.62665e-292	0.359	0.02
VIT	LL0000031865	ENSDARG00000063631	1.36492	6	1.71995e-283	4.72969e-279	0.585	0.066
mmp2	LL0000019407	ENSDARG00000017676	1.41434	6	3.26933e-220	8.99033e-216	0.796	0.17
cdh11	LL0000005316	ENSDARG00000021442	1.16422	6	1.11158e-219	3.05674e-215	0.672	0.109
zgc:113531	LL0000038625	ENSDARG00000038794	1.03233	6	1.50854e-216	4.14834e-212	0.543	0.072
twist1a	LL0000031388	ENSDARG00000030402	1.16679	6	1.09564e-189	3.01289e-185	0.605	0.103
angptl5	LL0000000988	ENSDARG00000056630	0.850141	6	2.02335e-176	5.56402e-172	0.429	0.054
tnn	LL0000030756	ENSDARG00000024829	1.52172	6	2.34824e-175	6.45742e-171	0.417	0.052
srpx	LL0000029390	ENSDARG00000010318	0.711468	6	1.11567e-170	3.06798e-166	0.303	0.027
foxc1b	LL0000010579	ENSDARG00000055398	0.79435	6	4.17028e-162	1.14679e-157	0.395	0.049
foxc1a	LL0000010578	ENSDARG00000091481	0.755525	6	1.90758e-154	5.24565e-150	0.347	0.04
col5a1	LL0000006015	ENSDARG00000012593	1.14789	6	4.98545e-153	1.37095e-148	0.773	0.207
pdgfrl	LL0000021526	ENSDARG00000006456	0.887489	6	1.68321e-149	4.62867e-145	0.434	0.064
tnc	LL0000030712	ENSDARG00000021948	0.883941	6	1.9781e-149	5.43958e-145	0.336	0.038
angptl1a	LL0000000982	ENSDARG00000012071	0.804112	6	2.03753e-149	5.60301e-145	0.49	0.08
sparc	LL0000029233	ENSDARG00000019353	1.29993	6	2.15835e-144	5.93525e-140	0.938	0.381
tnmd	LL0000030755	ENSDARG00000052615	1.72032	6	9.41252e-142	2.58835e-137	0.342	0.043
ctgfa	LL0000007729	ENSDARG00000042934	1.4384	6	6.57745e-141	1.80873e-136	0.594	0.129
six2a	LL0000028438	ENSDARG00000058004	0.805067	6	2.50975e-138	6.90157e-134	0.305	0.035
CU929237.1	LL0000008373	ENSDARG00000081800	0.911121	6	8.8319e-130	2.42868e-125	0.465	0.083
timp2a	LL0000030331	ENSDARG00000061226	0.86043	6	1.35063e-129	3.71409e-125	0.613	0.142
CYTL1	LL0000008640	ENSDARG00000110744	0.69413	6	2.54797e-128	7.00666e-124	0.294	0.034
foxp4	LL0000010626	ENSDARG00000076120	1.03936	6	1.04568e-127	2.87553e-123	0.818	0.276
wfdc2	LL0000032058	ENSDARG00000089187	1.02893	6	6.85849e-126	1.88602e-121	0.381	0.059
fgfbp2b	LL0000010313	ENSDARG00000038056	1.17728	6	5.71086e-125	1.57043e-120	0.336	0.045
fli1a	LL0000010389	ENSDARG00000054632	0.567866	6	1.43211e-119	3.93816e-115	0.319	0.043
cyr61	LL0000008623	ENSDARG00000023062	1.27978	6	2.41266e-117	6.63457e-113	0.734	0.236
si:ch1073-459j12.1	LL0000024861	ENSDARG00000006901	0.725751	6	2.22873e-115	6.12878e-111	0.364	0.057
mmp14a	LL0000019398	ENSDARG00000002235	0.660792	6	2.18701e-114	6.01406e-110	0.44	0.082
cyp26b1	LL0000008556	ENSDARG00000077121	0.755165	6	9.92129e-110	2.72825e-105	0.426	0.079
lum	LL0000018456	ENSDARG00000045580	1.04996	6	1.2158e-108	3.34334e-104	0.398	0.072
prelp	LL0000022543	ENSDARG00000070597	0.917078	6	5.44895e-108	1.49841e-103	0.345	0.055
ntd5	LL0000020680	ENSDARG00000040944	0.845078	6	5.06163e-103	1.3919e-98	0.577	0.149
fmoda	LL0000010422	ENSDARG00000044895	1.38102	6	2.40655e-102	6.61776e-98	0.549	0.143
fstl3	LL0000010897	ENSDARG00000025670	1.71493	6	4.64808e-101	1.27817e-96	0.504	0.12
eya1	LL0000009895	ENSDARG00000014259	0.556802	6	1.10649e-98	3.04274e-94	0.331	0.055
olfml3b	LL0000020871	ENSDARG00000062171	0.59087	6	5.86496e-98	1.61281e-93	0.403	0.079
tgfb3	LL0000030227	ENSDARG00000019367	0.687053	6	9.01008e-98	2.47768e-93	0.415	0.084
zgc:153704	LL0000038744	ENSDARG00000045979	1.22358	6	1.35509e-93	3.72636e-89	0.563	0.161
socs3b	LL0000029137	ENSDARG00000026611	0.839243	6	2.21404e-93	6.0884e-89	0.678	0.224
sox9a	LL0000029203	ENSDARG00000003293	0.600958	6	2.26377e-92	6.22514e-88	0.3	0.048
socs3a	LL0000029136	ENSDARG00000025428	0.917209	6	1.265e-88	3.47861e-84	0.919	0.451
pmp22a	LL0000022201	ENSDARG00000105223	0.683403	6	6.4047e-88	1.76123e-83	0.922	0.375
prrx1a	LL0000022700	ENSDARG00000033971	0.600971	6	1.39633e-87	3.83978e-83	0.384	0.078
mycb	LL0000019806	ENSDARG00000007241	0.980021	6	2.33136e-87	6.411e-83	0.644	0.223
serpinh1b	LL0000024517	ENSDARG00000019949	0.599784	6	9.30231e-87	2.55804e-82	0.261	0.039
tfpia	LL0000030215	ENSDARG00000034718	0.778277	6	4.13383e-86	1.13676e-81	0.328	0.061
colec12	LL0000006035	ENSDARG00000061140	0.623189	6	2.9278e-83	8.05117e-79	0.401	0.089
fosab	LL0000010566	ENSDARG00000031683	0.781444	6	1.26672e-82	3.48336e-78	0.989	0.689
mych	LL0000019810	ENSDARG00000077473	0.879336	6	1.5811e-82	4.34787e-78	0.734	0.302
ogna	LL0000020833	ENSDARG00000044132	1.15318	6	6.40403e-81	1.76104e-76	0.401	0.092
dcn	LL0000008724	ENSDARG00000012066	0.834115	6	3.85252e-79	1.05941e-74	0.574	0.181
zgc:162730	LL0000038847	ENSDARG00000103720	0.91676	6	4.93163e-79	1.35615e-74	0.924	0.511
mfap2	LL0000018921	ENSDARG00000059367	0.739945	6	4.74851e-78	1.30579e-73	0.625	0.208
reck	LL0000023377	ENSDARG00000090039	0.682656	6	6.28826e-78	1.72921e-73	0.423	0.105
junba	LL0000013045	ENSDARG00000074378	0.774478	6	3.79547e-75	1.04372e-70	0.93	0.509
si:ch211-251b21.1	LL0000025837	ENSDARG00000007275	0.843159	6	1.52455e-70	4.19235e-66	0.798	0.39
btg2	LL0000002063	ENSDARG00000020298	0.754254	6	1.5444e-69	4.24695e-65	0.927	0.53
ier2a	LL0000012474	ENSDARG00000099195	0.864104	6	4.40146e-69	1.21036e-64	0.835	0.459
tmem176	LL0000030516	ENSDARG00000078659	0.579135	6	1.81927e-66	5.00281e-62	0.675	0.244
si:ch211-286o17.1	LL0000026026	ENSDARG00000100446	0.74558	6	8.67115e-65	2.38448e-60	0.513	0.168
lrrc58b	LL0000018384	ENSDARG00000063509	0.5529	6	2.59744e-64	7.14271e-60	0.426	0.119
thbs1b	LL0000030260	ENSDARG00000010785	1.0077	6	1.98054e-63	5.44627e-59	0.308	0.07
pcdh18b	LL0000021363	ENSDARG00000052494	0.566878	6	8.54731e-63	2.35042e-58	0.289	0.061
cpn1	LL0000006151	ENSDARG00000096728	0.618629	6	1.22953e-62	3.38109e-58	0.367	0.095
sfrp2	LL0000024566	ENSDARG00000070050	1.09019	6	1.44283e-62	3.96764e-58	0.339	0.082
zgc:158343	LL0000038791	ENSDARG00000099411	0.861907	6	8.76802e-61	2.41112e-56	0.423	0.128
metrnla	LL0000018892	ENSDARG00000101914	0.645139	6	9.34224e-61	2.56902e-56	0.44	0.133
mmp14b	LL0000019399	ENSDARG00000008388	0.554183	6	1.03962e-58	2.85885e-54	0.308	0.073
bhmt	LL0000001893	ENSDARG00000013430	0.750566	6	1.73475e-58	4.77039e-54	0.798	0.4
igf2b	LL0000012531	ENSDARG00000033307	0.680323	6	1.85929e-58	5.11286e-54	0.375	0.104
sdc4	LL0000024337	ENSDARG00000059906	0.681627	6	2.18696e-58	6.01391e-54	0.843	0.458
si:dkey-239h2.3	LL0000027278	ENSDARG00000092033	0.656819	6	5.24111e-57	1.44125e-52	0.619	0.249
si:dkey-12l12.1	LL0000026730	ENSDARG00000094422	0.634448	6	5.02717e-54	1.38242e-49	0.364	0.101
eif4ebp3	LL0000009528	ENSDARG00000054916	0.665935	6	2.17922e-52	5.99263e-48	0.703	0.351
fxyd1	LL0000011010	ENSDARG00000099014	0.531525	6	4.83277e-51	1.32896e-46	0.471	0.167
mxra8b	LL0000019789	ENSDARG00000062129	0.566367	6	4.71558e-49	1.29674e-44	0.42	0.136
cebpd	LL0000005408	ENSDARG00000087303	0.500955	6	5.01672e-49	1.37955e-44	0.95	0.57
gadd45bb	LL0000011089	ENSDARG00000013576	0.566134	6	1.45628e-46	4.00461e-42	0.392	0.128
klf2b	LL0000013362	ENSDARG00000040432	0.546841	6	3.88058e-46	1.06712e-41	0.289	0.078
cldn11a	LL0000005757	ENSDARG00000020031	0.522632	6	1.33203e-44	3.66296e-40	0.272	0.069
cdon	LL0000005392	ENSDARG00000061328	0.53129	6	2.06218e-41	5.67078e-37	0.289	0.083
eif4ebp3l	LL0000009529	ENSDARG00000041607	0.567527	6	3.76817e-40	1.03621e-35	0.821	0.516
gadd45ab	LL0000011087	ENSDARG00000104571	0.548051	6	4.21304e-40	1.15854e-35	0.347	0.118
id1	LL0000012459	ENSDARG00000040764	0.818637	6	8.2903e-39	2.27975e-34	0.706	0.396
npm1a	LL0000020532	ENSDARG00000014329	0.50519	6	1.50911e-38	4.1499e-34	0.709	0.389
klf2a	LL0000013361	ENSDARG00000042667	0.772444	6	8.47997e-38	2.33191e-33	0.339	0.116
slc38a5b	LL0000028740	ENSDARG00000014587	0.503105	6	1.39355e-37	3.83212e-33	0.602	0.29
pno1	LL0000022214	ENSDARG00000008502	0.524559	6	4.51512e-37	1.24161e-32	0.734	0.442
junbb	LL0000013046	ENSDARG00000104773	0.503695	6	3.81606e-36	1.04938e-31	0.487	0.211
egr1	LL0000009456	ENSDARG00000037421	0.548842	6	2.0497e-35	5.63647e-31	0.597	0.295
hmga2	LL0000012167	ENSDARG00000069912	0.502995	6	8.16925e-33	2.24646e-28	0.333	0.121
lxn	LL0000018460	ENSDARG00000043102	0.565842	6	1.29034e-32	3.54831e-28	0.574	0.289
slc3a2b	LL0000028761	ENSDARG00000037012	0.555497	6	9.98209e-32	2.74497e-27	0.725	0.471
marcksl1a	LL0000018675	ENSDARG00000039034	0.541988	6	6.70822e-17	1.84469e-12	0.585	0.363
nusap1	LL0000020771	ENSDARG00000002403	1.90551	7	0	0	0.677	0.019
cdk1	LL0000005346	ENSDARG00000087554	1.70425	7	0	0	0.637	0.022
ube2c	LL0000031465	ENSDARG00000114670	1.6572	7	0	0	0.582	0.018
si:ch211-69g19.2	LL0000026126	ENSDARG00000070656	1.60512	7	0	0	0.452	0.01
hes2.2	LL0000012067	ENSDARG00000068168	1.55874	7	0	0	0.331	0.008
ccna2	LL0000005160	ENSDARG00000011094	1.43623	7	0	0	0.654	0.024
zgc:110540	LL0000038518	ENSDARG00000054929	1.39967	7	0	0	0.548	0.05
kpna2	LL0000013441	ENSDARG00000038066	1.37749	7	0	0	0.383	0.013
mki67	LL0000019348	ENSDARG00000091150	1.34751	7	0	0	0.654	0.027
mad2l1	LL0000018517	ENSDARG00000004713	1.2973	7	0	0	0.573	0.021
cks1b	LL0000005732	ENSDARG00000007971	1.24025	7	0	0	0.599	0.04
tpx2	LL0000030901	ENSDARG00000078654	1.18727	7	0	0	0.493	0.016
top2a	LL0000030823	ENSDARG00000024488	1.18297	7	0	0	0.499	0.017
aspm	LL0000001499	ENSDARG00000103754	1.18196	7	0	0	0.455	0.011
aurkb	LL0000001690	ENSDARG00000037640	1.15401	7	0	0	0.565	0.025
ascl1a	LL0000001472	ENSDARG00000038386	1.13947	7	0	0	0.415	0.023
si:dkey-238o13.4	LL0000027272	ENSDARG00000078847	1.06329	7	0	0	0.268	0.006
dlgap5	LL0000008989	ENSDARG00000045167	1.01577	7	0	0	0.524	0.016
plk1	LL0000022136	ENSDARG00000058471	1.01471	7	0	0	0.455	0.013
ccnb3	LL0000005164	ENSDARG00000034855	1.00417	7	0	0	0.409	0.011
armc1l	LL0000001379	ENSDARG00000020887	0.979598	7	0	0	0.493	0.027
birc5a	LL0000001913	ENSDARG00000075621	0.970992	7	0	0	0.438	0.013
cdca8	LL0000005309	ENSDARG00000043137	0.970985	7	0	0	0.412	0.011
kif11	LL0000013282	ENSDARG00000010948	0.970679	7	0	0	0.369	0.008
cdc20	LL0000005274	ENSDARG00000100741	0.955254	7	0	0	0.406	0.008
foxn4	LL0000010613	ENSDARG00000010591	0.927281	7	0	0	0.435	0.009
cenpf	LL0000005429	ENSDARG00000055133	0.924365	7	0	0	0.378	0.007
kifc1	LL0000013328	ENSDARG00000001558	0.90548	7	0	0	0.424	0.01
ccnb1	LL0000005161	ENSDARG00000051923	0.891471	7	0	0	0.36	0.007
spc24	LL0000029254	ENSDARG00000093622	0.85364	7	0	0	0.412	0.016
kif22	LL0000013304	ENSDARG00000102624	0.847521	7	0	0	0.438	0.023
cdc25b	LL0000005276	ENSDARG00000010792	0.84323	7	0	0	0.429	0.027
cenpw	LL0000005441	ENSDARG00000092136	0.810055	7	0	0	0.441	0.03
prc1a	LL0000022509	ENSDARG00000100918	0.801883	7	0	0	0.34	0.006
cks2	LL0000039776	ENSDARG00000071410	0.801619	7	0	0	0.38	0.012
g2e3	LL0000011036	ENSDARG00000001313	0.800444	7	0	0	0.372	0.011
spc25	LL0000029255	ENSDARG00000078433	0.788696	7	0	0	0.444	0.021
zgc:113984.1	LL0000040276	ENSDARG00000115644	0.766451	7	0	0	0.297	0.008
ncapg	LL0000020045	ENSDARG00000070109	0.734054	7	0	0	0.415	0.015
smc2	LL0000028963	ENSDARG00000017744	0.710502	7	0	0	0.372	0.019
pttg1	LL0000022923	ENSDARG00000075421	0.64404	7	0	0	0.329	0.013
arhgap19	LL0000001267	ENSDARG00000083189	0.612808	7	0	0	0.311	0.012
aurka	LL0000001688	ENSDARG00000012485	0.600844	7	0	0	0.259	0.003
pbk	LL0000021335	ENSDARG00000007221	0.587787	7	0	0	0.32	0.013
tacc3	LL0000029903	ENSDARG00000005454	0.561718	7	0	0	0.262	0.007
ndc80	LL0000020084	ENSDARG00000071694	0.547637	7	0	0	0.303	0.012
melk	LL0000018867	ENSDARG00000030759	0.545001	7	0	0	0.256	0.006
nuf2	LL0000020737	ENSDARG00000034624	0.513645	7	2.60321e-307	7.15855e-303	0.271	0.009
kif20a	LL0000013299	ENSDARG00000044491	0.526704	7	1.27137e-303	3.49614e-299	0.256	0.008
lbr	LL0000013553	ENSDARG00000014013	1.47104	7	7.72453e-302	2.12417e-297	0.755	0.11
hes6	LL0000012068	ENSDARG00000019335	1.45592	7	4.43001e-298	1.21821e-293	0.625	0.069
dla	LL0000008966	ENSDARG00000010791	1.10113	7	2.5625e-281	7.04662e-277	0.499	0.044
tuba1b	LL0000031347	ENSDARG00000045367	0.970924	7	4.67638e-278	1.28596e-273	0.47	0.04
cdca5	LL0000005306	ENSDARG00000044437	0.547444	7	5.83858e-277	1.60555e-272	0.326	0.017
slc29a2	LL0000028656	ENSDARG00000001767	0.790469	7	1.00869e-272	2.77379e-268	0.314	0.016
h2afx	LL0000011902	ENSDARG00000029406	1.36445	7	6.48061e-263	1.7821e-258	0.602	0.075
ncapd2	LL0000020043	ENSDARG00000005058	0.551786	7	3.59695e-256	9.89126e-252	0.303	0.016
insm1a	LL0000012790	ENSDARG00000091756	1.42387	7	1.13696e-254	3.12652e-250	0.501	0.05
LOC100330864	LL0000039875	ENSDARG00000020711	1.78494	7	1.45367e-252	3.99745e-248	0.467	0.044
rrm2	LL0000040133	ENSDARG00000078069	1.63709	7	9.82473e-247	2.7017e-242	0.455	0.043
krcp	LL0000013451	ENSDARG00000040224	0.621593	7	8.96391e-245	2.46499e-240	0.314	0.018
zgc:55461	LL0000039158	ENSDARG00000041723	0.767475	7	2.37653e-244	6.53522e-240	0.375	0.028
gadd45gb.1	LL0000011091	ENSDARG00000016725	0.869986	7	3.61389e-242	9.93784e-238	0.337	0.022
rrm1	LL0000024032	ENSDARG00000014017	1.00173	7	1.53089e-234	4.2098e-230	0.467	0.048
cldn5b	LL0000005772	ENSDARG00000014059	1.00543	7	2.78143e-233	7.64864e-229	0.346	0.024
ptprua	LL0000022915	ENSDARG00000092638	0.609723	7	1.59396e-213	4.38324e-209	0.282	0.017
sinhcafl	LL0000028422	ENSDARG00000095007	1.46212	7	6.13528e-213	1.68714e-208	0.833	0.195
hmga1a	LL0000012165	ENSDARG00000028335	2.15632	7	1.15486e-212	3.17576e-208	0.988	0.534
CABZ01005379.1	LL0000003989	ENSDARG00000117637	0.737805	7	7.3174e-212	2.01221e-207	0.386	0.035
hmgb2b	LL0000012171	ENSDARG00000053990	2.00095	7	7.41009e-210	2.0377e-205	0.986	0.529
mibp	LL0000019006	ENSDARG00000101362	1.32874	7	1.19203e-207	3.27796e-203	0.628	0.1
tp53inp2	LL0000030852	ENSDARG00000088178	1.3362	7	2.48842e-207	6.84292e-203	0.571	0.084
cdc14b	LL0000005272	ENSDARG00000021483	1.00898	7	2.52801e-207	6.95178e-203	0.516	0.067
hmgb2a	LL0000012170	ENSDARG00000029722	2.46933	7	1.2762e-204	3.50943e-200	0.988	0.654
msi1	LL0000019639	ENSDARG00000010710	0.816251	7	1.12129e-203	3.08344e-199	0.579	0.082
lmnb1	LL0000013731	ENSDARG00000044299	0.893106	7	1.5272e-199	4.19964e-195	0.559	0.082
her15.1	LL0000012046	ENSDARG00000054562	1.80769	7	2.24313e-199	6.16839e-195	0.628	0.106
si:ch211-156b7.4	LL0000025188	ENSDARG00000101707	1.13592	7	5.92362e-199	1.62894e-194	0.706	0.137
tuba1a	LL0000031346	ENSDARG00000001889	1.35264	7	1.36642e-198	3.75751e-194	0.833	0.19
hmgn2	LL0000012179	ENSDARG00000099572	2.42898	7	7.8682e-198	2.16368e-193	0.991	0.776
h2afvb	LL0000011901	ENSDARG00000116491	1.67756	7	9.42706e-197	2.59235e-192	0.98	0.491
bub3	LL0000002092	ENSDARG00000075883	0.844966	7	2.34105e-192	6.43764e-188	0.487	0.065
h3f3a	LL0000039823	ENSDARG00000020504	1.95401	7	3.75389e-188	1.03228e-183	0.977	0.571
arpp19b	LL0000001408	ENSDARG00000039880	0.973322	7	1.80096e-187	4.95247e-183	0.579	0.097
marcksb	LL0000018674	ENSDARG00000008803	1.08463	7	2.08056e-187	5.72132e-183	0.847	0.198
dek	LL0000008817	ENSDARG00000070108	0.867653	7	1.66636e-185	4.58233e-181	0.516	0.075
notch1a	LL0000020483	ENSDARG00000103554	0.577381	7	8.14389e-180	2.23949e-175	0.308	0.026
vezf1a	LL0000031840	ENSDARG00000008247	0.508603	7	2.2386e-179	6.15592e-175	0.311	0.026
si:ch211-288g17.3	LL0000026030	ENSDARG00000070959	1.36043	7	8.00958e-176	2.20256e-171	0.934	0.336
cadm3	LL0000004790	ENSDARG00000057013	0.910558	7	1.73047e-175	4.75862e-171	0.548	0.084
stmn1a	LL0000029569	ENSDARG00000004169	1.58429	7	7.99646e-175	2.19895e-170	0.873	0.289
hmgb1b	LL0000012169	ENSDARG00000030479	1.50478	7	3.08684e-173	8.48849e-169	0.968	0.422
suv39h1b	LL0000029701	ENSDARG00000055753	0.538169	7	4.82249e-171	1.32614e-166	0.297	0.025
si:ch211-137a8.4	LL0000025074	ENSDARG00000078748	0.913136	7	2.22898e-165	6.12948e-161	0.764	0.168
marcksa	LL0000018673	ENSDARG00000004049	0.906054	7	7.37326e-165	2.02757e-160	0.631	0.118
enc3	LL0000009639	ENSDARG00000058322	0.770745	7	3.91513e-163	1.07662e-158	0.334	0.035
h2afva	LL0000011900	ENSDARG00000068820	1.13832	7	4.82698e-163	1.32737e-158	0.885	0.278
mxd3	LL0000019779	ENSDARG00000098350	0.662568	7	3.40894e-162	9.37426e-158	0.378	0.043
seta	LL0000024527	ENSDARG00000031495	1.36976	7	6.40958e-162	1.76257e-157	0.922	0.398
pane1	LL0000021244	ENSDARG00000024681	0.542089	7	3.99658e-160	1.09902e-155	0.259	0.02
olig2	LL0000020873	ENSDARG00000040946	1.30858	7	4.18635e-159	1.1512e-154	0.259	0.02
cldn5a	LL0000005771	ENSDARG00000043716	0.522604	7	2.66888e-156	7.33915e-152	0.331	0.034
slbp	LL0000028469	ENSDARG00000100558	0.713183	7	4.04996e-156	1.1137e-151	0.36	0.042
mycla	LL0000019811	ENSDARG00000006003	0.517802	7	2.15096e-154	5.91492e-150	0.317	0.032
baz1a	LL0000001804	ENSDARG00000099745	0.572804	7	4.62853e-153	1.2728e-148	0.398	0.052
tubb2b	LL0000031358	ENSDARG00000098591	1.55895	7	3.89488e-152	1.07105e-147	0.899	0.363
rad21a	LL0000023123	ENSDARG00000006092	1.1163	7	1.1963e-151	3.28971e-147	0.827	0.262
rbbp4	LL0000023255	ENSDARG00000029058	0.948682	7	1.17069e-148	3.21927e-144	0.599	0.122
CU634008.1	LL0000008125	ENSDARG00000100430	0.920878	7	7.57875e-148	2.08408e-143	0.401	0.054
tubb4b	LL0000031359	ENSDARG00000002344	1.40948	7	2.2833e-145	6.27886e-141	0.986	0.696
sox11b	LL0000029180	ENSDARG00000095743	0.9374	7	4.85449e-145	1.33494e-140	0.631	0.131
cirbpa	LL0000005708	ENSDARG00000103672	1.15147	7	1.00319e-143	2.75866e-139	0.98	0.663
cdk2	LL0000005357	ENSDARG00000026577	0.560504	7	1.4164e-143	3.89497e-139	0.343	0.041
tmpob	LL0000030674	ENSDARG00000022978	0.782539	7	2.35111e-141	6.46533e-137	0.573	0.112
ss18l2	LL0000029415	ENSDARG00000101085	0.757457	7	1.56563e-140	4.30532e-136	0.424	0.065
fabp7a	LL0000009941	ENSDARG00000007697	1.23344	7	7.50955e-140	2.06505e-135	0.87	0.339
chaf1a	LL0000005556	ENSDARG00000062152	0.685444	7	1.81131e-138	4.98091e-134	0.418	0.064
snrpd1	LL0000029078	ENSDARG00000011648	0.967239	7	1.72109e-137	4.73282e-133	0.827	0.277
ilf2	LL0000012693	ENSDARG00000014591	0.861963	7	1.38267e-136	3.8022e-132	0.781	0.225
zbtb18	LL0000038304	ENSDARG00000028228	0.648314	7	2.78814e-136	7.6671e-132	0.395	0.056
rorb	LL0000023864	ENSDARG00000033498	0.868963	7	3.17083e-136	8.71945e-132	0.383	0.053
otx2b	LL0000021139	ENSDARG00000011235	0.840052	7	6.37406e-134	1.7528e-129	0.317	0.037
hnrnpa0b	LL0000012204	ENSDARG00000036162	1.13954	7	7.2037e-134	1.98095e-129	0.957	0.5
anp32b	LL0000001085	ENSDARG00000023330	1.01633	7	3.73582e-131	1.02731e-126	0.807	0.276
tuba8l4	LL0000031355	ENSDARG00000006260	1.28599	7	7.23515e-128	1.9896e-123	0.879	0.398
hmgb1a	LL0000012168	ENSDARG00000099175	1.17565	7	2.57971e-127	7.09395e-123	0.957	0.485
dut	LL0000009295	ENSDARG00000106529	0.986698	7	2.27214e-124	6.24815e-120	0.49	0.096
her4.2	LL0000012050	ENSDARG00000094426	1.14793	7	4.74287e-124	1.30424e-119	0.47	0.086
si:ch211-222l21.1	LL0000025644	ENSDARG00000076532	1.46815	7	4.82836e-124	1.32775e-119	0.919	0.485
her4.4	LL0000012052	ENSDARG00000009822	1.02613	7	1.90041e-122	5.22595e-118	0.389	0.06
ran	LL0000023166	ENSDARG00000057026	0.956092	7	3.314e-121	9.11318e-117	0.971	0.696
crabp1a	LL0000007263	ENSDARG00000045926	0.826392	7	6.97009e-121	1.91671e-116	0.294	0.035
ptmab	LL0000022860	ENSDARG00000101766	1.15608	7	1.61794e-120	4.44918e-116	0.994	0.85
ddx39ab	LL0000008782	ENSDARG00000015111	0.868297	7	2.14951e-120	5.91095e-116	0.729	0.223
snrpf	LL0000029083	ENSDARG00000105037	0.934095	7	4.78902e-119	1.31693e-114	0.798	0.285
khdrbs1a	LL0000013267	ENSDARG00000052856	0.969041	7	1.45521e-118	4.00168e-114	0.98	0.647
uba2	LL0000031440	ENSDARG00000101332	0.701903	7	6.77727e-118	1.86368e-113	0.539	0.118
si:ch73-281n10.2	LL0000026414	ENSDARG00000097102	1.2612	7	2.12084e-116	5.83209e-112	0.971	0.719
pax6a	LL0000021325	ENSDARG00000103379	0.570664	7	3.65427e-116	1.00489e-111	0.311	0.04
banf1	LL0000001790	ENSDARG00000037009	1.0892	7	7.47562e-116	2.05572e-111	0.7	0.229
mcm7	LL0000018777	ENSDARG00000101180	0.921549	7	1.02341e-115	2.81429e-111	0.599	0.155
smarcd1	LL0000028955	ENSDARG00000019004	0.676361	7	2.44565e-115	6.7253e-111	0.548	0.121
nono	LL0000020468	ENSDARG00000020482	0.856353	7	6.02214e-114	1.65603e-109	0.697	0.207
anp32a	LL0000001084	ENSDARG00000006487	0.963339	7	1.08149e-113	2.97398e-109	0.945	0.509
sae1	LL0000024166	ENSDARG00000010487	0.554667	7	1.11669e-113	3.07079e-109	0.314	0.043
her12	LL0000012044	ENSDARG00000032963	1.1282	7	4.75434e-111	1.3074e-106	0.256	0.03
cbx3a	LL0000004998	ENSDARG00000003860	0.948508	7	9.082e-111	2.49746e-106	0.807	0.318
hnrnpabb	LL0000012210	ENSDARG00000099865	0.956029	7	3.51093e-109	9.65472e-105	0.911	0.451
snrpg	LL0000029084	ENSDARG00000099667	0.879256	7	1.08422e-108	2.98151e-104	0.749	0.255
six6b	LL0000028446	ENSDARG00000031316	0.525868	7	1.97662e-108	5.4355e-104	0.311	0.043
sumo3b	LL0000029679	ENSDARG00000035993	1.03111	7	2.83619e-108	7.79925e-104	0.709	0.233
nucks1a	LL0000020711	ENSDARG00000078473	0.893086	7	4.32522e-108	1.18939e-103	0.839	0.318
ncam1a	LL0000020038	ENSDARG00000056181	0.534349	7	7.25192e-108	1.9942e-103	0.444	0.083
tmem35	LL0000030609	ENSDARG00000052567	0.514025	7	7.46106e-108	2.05172e-103	0.363	0.057
smarca5	LL0000028946	ENSDARG00000052348	0.569987	7	3.4491e-105	9.48468e-101	0.323	0.049
ccnd1	LL0000005166	ENSDARG00000101637	1.2178	7	6.42257e-105	1.76614e-100	0.614	0.188
si:ch73-1a9.3	LL0000026297	ENSDARG00000103919	0.868998	7	3.63827e-104	1.00049e-99	0.997	0.834
snrpe	LL0000029082	ENSDARG00000033175	0.828843	7	3.69911e-104	1.01722e-99	0.801	0.305
pcna	LL0000021440	ENSDARG00000054155	1.32864	7	3.31241e-103	9.10879e-99	0.625	0.193
FO082781.1	LL0000010452	ENSDARG00000076638	0.567299	7	5.76341e-102	1.58488e-97	0.536	0.122
khsrp	LL0000013273	ENSDARG00000026489	0.73762	7	1.93496e-100	5.32094e-96	0.66	0.208
snrpb	LL0000029075	ENSDARG00000011125	0.846142	7	3.6332e-100	9.99095e-96	0.856	0.384
smarca4a	LL0000028945	ENSDARG00000077226	0.57887	7	1.88251e-97	5.1767e-93	0.501	0.119
rpa3	LL0000023876	ENSDARG00000002613	0.684945	7	4.3205e-96	1.1881e-91	0.49	0.117
lsm7	LL0000018437	ENSDARG00000058328	0.813763	7	6.21265e-95	1.70842e-90	0.761	0.298
smc1al	LL0000028961	ENSDARG00000058203	0.742752	7	8.83035e-95	2.42826e-90	0.651	0.201
lig1	LL0000013663	ENSDARG00000060041	0.707137	7	9.70244e-95	2.66807e-90	0.386	0.076
im:7152348	LL0000012718	ENSDARG00000097082	0.927409	7	1.22882e-94	3.37914e-90	0.438	0.098
ewsr1b	LL0000039796	ENSDARG00000020465	0.724788	7	1.27492e-94	3.50591e-90	0.692	0.231
XLOC-003690	LL0000032644		0.784809	7	5.16224e-94	1.41957e-89	0.346	0.06
hnrnpub	LL0000012223	ENSDARG00000004735	0.614363	7	5.52082e-94	1.51817e-89	0.481	0.113
neurod4	LL0000020226	ENSDARG00000003469	0.720893	7	7.78932e-94	2.14198e-89	0.401	0.076
cirbpb	LL0000005709	ENSDARG00000013351	0.723008	7	1.07441e-93	2.95452e-89	0.994	0.832
nasp	LL0000019993	ENSDARG00000039208	0.62073	7	1.36291e-93	3.74787e-89	0.389	0.078
hpf1	LL0000012298	ENSDARG00000057114	0.522411	7	1.69933e-93	4.67298e-89	0.334	0.058
hnrnpaba	LL0000012209	ENSDARG00000007960	0.826556	7	1.84936e-93	5.08556e-89	0.968	0.695
pou3f1	LL0000022333	ENSDARG00000009823	0.619186	7	2.22515e-93	6.11893e-89	0.375	0.069
CDK2AP1	LL0000005360	ENSDARG00000115248	0.536217	7	3.14032e-93	8.63556e-89	0.346	0.061
snrpd2	LL0000029079	ENSDARG00000040440	0.754734	7	3.88607e-93	1.06863e-88	0.758	0.286
sumo3a	LL0000029678	ENSDARG00000028119	0.917215	7	7.40356e-93	2.0359e-88	0.876	0.441
si:ch211-51e12.7	LL0000026057	ENSDARG00000045914	0.714887	7	1.6198e-91	4.4543e-87	0.735	0.259
hdac1	LL0000011987	ENSDARG00000015427	0.739959	7	2.12547e-90	5.84482e-86	0.781	0.3
top1l	LL0000030821	ENSDARG00000070545	0.6667	7	3.02724e-90	8.3246e-86	0.464	0.111
msna	LL0000019649	ENSDARG00000058128	0.843765	7	6.10612e-90	1.67912e-85	0.637	0.206
tuba8l	LL0000031352	ENSDARG00000042708	1.38711	7	2.13559e-89	5.87265e-85	0.62	0.227
chd7	LL0000005577	ENSDARG00000075211	0.587787	7	2.30847e-89	6.34805e-85	0.447	0.102
phf5a	LL0000021710	ENSDARG00000045155	0.684109	7	5.99252e-89	1.64788e-84	0.545	0.149
her4.1	LL0000012049	ENSDARG00000056732	0.75069	7	8.74488e-89	2.40475e-84	0.343	0.061
hnrnpa0l	LL0000039827	ENSDARG00000036161	0.736006	7	8.92176e-89	2.45339e-84	0.971	0.713
rbm4.3	LL0000023298	ENSDARG00000022129	0.800644	7	1.38408e-88	3.80608e-84	0.847	0.393
smarce1	LL0000028959	ENSDARG00000016871	0.656687	7	1.62139e-88	4.45866e-84	0.775	0.284
hnrnpr	LL0000012221	ENSDARG00000014569	0.537888	7	2.21612e-88	6.0941e-84	0.625	0.185
hnrnpa0a	LL0000012203	ENSDARG00000089302	0.569301	7	3.1687e-87	8.71361e-83	0.744	0.252
hmgn6	LL0000012181	ENSDARG00000087636	0.775688	7	5.32851e-87	1.46529e-82	0.974	0.672
psma6a	LL0000022737	ENSDARG00000019398	0.55265	7	2.07545e-86	5.70728e-82	0.501	0.131
sox3	LL0000029194	ENSDARG00000053569	0.885924	7	1.99615e-84	5.48922e-80	0.329	0.061
rpa2	LL0000023875	ENSDARG00000037188	0.666399	7	2.65454e-84	7.29972e-80	0.424	0.099
chrac1	LL0000005627	ENSDARG00000042337	0.651372	7	3.57429e-84	9.82894e-80	0.473	0.122
lsm8	LL0000018438	ENSDARG00000091656	0.581792	7	5.1506e-84	1.41636e-79	0.516	0.141
tspan7	LL0000031260	ENSDARG00000015759	0.558791	7	1.3489e-83	3.70933e-79	0.45	0.108
tma7	LL0000030406	ENSDARG00000071670	0.817849	7	1.56485e-83	4.30318e-79	0.885	0.479
apex1	LL0000001162	ENSDARG00000045843	0.68429	7	1.95848e-83	5.38564e-79	0.542	0.158
setb	LL0000024528	ENSDARG00000003920	0.815303	7	1.00655e-82	2.76791e-78	0.867	0.455
mex3b	LL0000018918	ENSDARG00000058369	0.605674	7	1.31315e-82	3.61103e-78	0.444	0.104
snrpd3l	LL0000029081	ENSDARG00000076283	0.660562	7	6.89336e-82	1.89561e-77	0.651	0.223
snrpc	LL0000029077	ENSDARG00000009871	0.53469	7	3.27308e-81	9.00066e-77	0.562	0.163
ddx39aa	LL0000008781	ENSDARG00000006225	0.622334	7	2.26035e-80	6.21574e-76	0.646	0.219
tcea1	LL0000030066	ENSDARG00000003531	0.539475	7	4.67581e-80	1.2858e-75	0.582	0.172
snrpa	LL0000029073	ENSDARG00000018890	0.561388	7	9.98803e-80	2.74661e-75	0.519	0.147
lsm3	LL0000018433	ENSDARG00000089663	0.606815	7	2.47586e-79	6.80837e-75	0.608	0.198
ppiab	LL0000022373	ENSDARG00000103994	0.648872	7	3.14285e-79	8.64251e-75	0.988	0.817
XLOC-003692	LL0000032645		0.829605	7	5.15897e-79	1.41867e-74	0.277	0.046
nutf2l	LL0000020773	ENSDARG00000014499	0.63414	7	1.04946e-78	2.8859e-74	0.568	0.179
syncrip	LL0000029743	ENSDARG00000040184	0.73657	7	3.71021e-78	1.02027e-73	0.844	0.419
hnrnph1l	LL0000012215	ENSDARG00000005551	0.594222	7	5.90601e-78	1.62409e-73	0.513	0.145
lfng	LL0000013610	ENSDARG00000037879	0.767486	7	6.63172e-78	1.82366e-73	0.452	0.114
rtca	LL0000024069	ENSDARG00000002215	0.502467	7	1.35793e-76	3.73416e-72	0.32	0.062
MZT1	LL0000019925	ENSDARG00000096668	0.516147	7	9.59554e-76	2.63868e-71	0.392	0.092
fam76b	LL0000010100	ENSDARG00000012432	0.574733	7	2.34374e-74	6.44504e-70	0.438	0.114
hnrnpa1b	LL0000012207	ENSDARG00000036675	0.728499	7	6.02144e-74	1.65584e-69	0.654	0.252
si:dkey-42i9.4	LL0000027656	ENSDARG00000008049	0.642738	7	1.25178e-73	3.44227e-69	0.755	0.318
psma5	LL0000022736	ENSDARG00000003526	0.632662	7	2.39747e-73	6.59279e-69	0.588	0.199
actl6a	LL0000000224	ENSDARG00000070828	0.500243	7	7.95975e-73	2.18885e-68	0.429	0.11
adssl	LL0000000426	ENSDARG00000012399	0.547643	7	9.33314e-73	2.56652e-68	0.412	0.105
sox11a	LL0000029179	ENSDARG00000077811	0.566792	7	1.71513e-72	4.71643e-68	0.536	0.157
arl4aa	LL0000001359	ENSDARG00000099918	0.535169	7	1.77947e-71	4.89337e-67	0.282	0.054
mapre1b	LL0000018656	ENSDARG00000002659	0.51288	7	3.5588e-70	9.78634e-66	0.412	0.103
rsf1b.1	LL0000024051	ENSDARG00000093503	0.509993	7	5.97604e-70	1.64335e-65	0.487	0.137
sf3b5	LL0000024557	ENSDARG00000016855	0.565094	7	1.52991e-69	4.20709e-65	0.591	0.203
fzr1a	LL0000011033	ENSDARG00000015254	0.534777	7	3.55814e-69	9.78454e-65	0.435	0.117
dpy30	LL0000009176	ENSDARG00000004427	0.605795	7	4.61488e-69	1.26904e-64	0.671	0.264
ahcy	LL0000000490	ENSDARG00000005191	0.596115	7	3.95323e-68	1.0871e-63	0.772	0.343
taf15	LL0000029919	ENSDARG00000070019	0.614532	7	1.22286e-67	3.36275e-63	0.594	0.215
h3f3d	LL0000011908	ENSDARG00000045248	0.513312	7	2.35157e-67	6.46657e-63	0.994	0.893
psmb4	LL0000022749	ENSDARG00000054696	0.532605	7	1.64743e-66	4.53026e-62	0.611	0.222
cbx5	LL0000005001	ENSDARG00000061187	0.599943	7	2.32566e-66	6.39533e-62	0.732	0.31
si:ch1073-429i10.3.1	LL0000040151	ENSDARG00000068436	0.661963	7	1.21742e-65	3.34778e-61	0.876	0.508
u2af2b	LL0000031433	ENSDARG00000011740	0.521572	7	1.31401e-65	3.61339e-61	0.501	0.157
lsm6	LL0000018436	ENSDARG00000036995	0.57656	7	2.13903e-65	5.88211e-61	0.599	0.214
srsf2a	LL0000029401	ENSDARG00000057484	0.626094	7	4.63955e-64	1.27583e-59	0.729	0.322
lsm5	LL0000018435	ENSDARG00000071573	0.580689	7	5.07453e-64	1.39545e-59	0.608	0.23
fkbp1aa	LL0000010373	ENSDARG00000022684	0.589416	7	1.91298e-63	5.26051e-59	0.965	0.687
hnrnpa1a	LL0000012206	ENSDARG00000011020	0.515502	7	3.01772e-63	8.29842e-59	0.545	0.182
alyref	LL0000000932	ENSDARG00000077732	0.511149	7	3.71166e-63	1.02067e-58	0.441	0.129
ppm1g	LL0000022399	ENSDARG00000075559	0.506784	7	7.26878e-63	1.99884e-58	0.429	0.122
mycn	LL0000019813	ENSDARG00000006837	0.552611	7	1.96813e-62	5.41217e-58	0.418	0.115
rbm8a	LL0000023308	ENSDARG00000016516	0.619622	7	2.76912e-62	7.6148e-58	0.81	0.417
tgif1	LL0000030235	ENSDARG00000059337	0.518779	7	2.81086e-62	7.72958e-58	0.455	0.136
psma8	LL0000022740	ENSDARG00000010965	0.553238	7	3.80112e-62	1.04527e-57	0.651	0.26
sarnp	LL0000024207	ENSDARG00000059357	0.540317	7	4.49922e-62	1.23724e-57	0.545	0.192
psmb7	LL0000022752	ENSDARG00000037962	0.611392	7	9.90833e-62	2.72469e-57	0.697	0.303
nfybb	LL0000020281	ENSDARG00000045611	0.509666	7	1.70624e-61	4.69199e-57	0.372	0.097
calm2b	LL0000004818	ENSDARG00000015050	0.572796	7	5.76426e-61	1.58511e-56	0.928	0.574
cfl1	LL0000005532	ENSDARG00000021124	0.577053	7	9.33797e-61	2.56785e-56	0.963	0.679
sap18	LL0000024197	ENSDARG00000057854	0.503132	7	1.63671e-60	4.50079e-56	0.686	0.283
psma2	LL0000022733	ENSDARG00000040121	0.544983	7	3.58679e-59	9.86332e-55	0.504	0.173
sub1a	LL0000029641	ENSDARG00000053446	0.653138	7	4.89613e-59	1.34639e-54	0.729	0.339
srsf3b	LL0000029404	ENSDARG00000059360	0.588982	7	1.12932e-58	3.10551e-54	0.7	0.309
prmt1	LL0000022621	ENSDARG00000010246	0.615455	7	1.78425e-58	4.90651e-54	0.64	0.268
h3f3c	LL0000011907	ENSDARG00000033009	0.607482	7	2.54819e-58	7.00726e-54	0.968	0.732
psmb1	LL0000022741	ENSDARG00000009640	0.575827	7	2.67302e-58	7.35052e-54	0.657	0.275
u2af1	LL0000031431	ENSDARG00000015325	0.550658	7	4.11376e-57	1.13124e-52	0.53	0.191
pin1	LL0000021973	ENSDARG00000101915	0.546053	7	6.16766e-57	1.69605e-52	0.602	0.24
rpl22l1	LL0000023909	ENSDARG00000010244	0.574091	7	4.85835e-56	1.336e-51	0.919	0.631
psmb3	LL0000022748	ENSDARG00000013938	0.565664	7	1.59409e-54	4.38358e-50	0.585	0.23
btg3	LL0000002064	ENSDARG00000069065	0.527295	7	6.85001e-53	1.88368e-48	0.406	0.125
srsf7a	LL0000029410	ENSDARG00000035325	0.555973	7	2.15061e-52	5.91396e-48	0.683	0.318
calm3b	LL0000004820	ENSDARG00000074057	0.55972	7	6.16544e-52	1.69543e-47	0.87	0.524
morf4l1	LL0000019456	ENSDARG00000041155	0.538018	7	3.78725e-51	1.04146e-46	0.588	0.243
selenoh	LL0000024398	ENSDARG00000093022	0.501712	7	1.20812e-48	3.32222e-44	0.7	0.322
crabp2a	LL0000007265	ENSDARG00000073978	0.501192	7	5.1528e-48	1.41697e-43	0.265	0.063
ranbp1	LL0000023167	ENSDARG00000014817	0.58063	7	8.19388e-47	2.25323e-42	0.68	0.345
eif5a2	LL0000009539	ENSDARG00000056186	0.609137	7	1.35412e-45	3.7237e-41	0.781	0.449
neurod1	LL0000020224	ENSDARG00000019566	0.538505	7	8.2797e-45	2.27683e-40	0.354	0.105
cdca7a	LL0000005307	ENSDARG00000077620	0.531627	7	1.02789e-41	2.82661e-37	0.277	0.077
jpt2	LL0000013042	ENSDARG00000034427	0.519282	7	1.81114e-41	4.98045e-37	0.548	0.246
arl6ip1	LL0000001367	ENSDARG00000054578	0.534383	7	1.14195e-35	3.14026e-31	0.68	0.377
mycn	LL0000019813	ENSDARG00000006837	0.840843	8	4.99461e-102	1.37347e-97	0.491	0.112
rps20	LL0000023976	ENSDARG00000036044	0.609494	8	8.95746e-97	2.46321e-92	0.997	0.978
rplp2l	LL0000023943	ENSDARG00000011201	0.641059	8	9.09053e-92	2.4998e-87	0.988	0.929
stmn1a	LL0000029569	ENSDARG00000004169	1.13998	8	3.19593e-90	8.78848e-86	0.728	0.293
mcm7	LL0000018777	ENSDARG00000101180	0.771983	8	4.77126e-89	1.31205e-84	0.552	0.156
rps12	LL0000023964	ENSDARG00000036875	0.634347	8	7.82008e-88	2.15044e-83	0.983	0.959
rpsa	LL0000024009	ENSDARG00000019181	0.532689	8	5.3767e-86	1.47854e-81	0.994	0.94
rplp1	LL0000023941	ENSDARG00000021864	0.529296	8	4.4568e-85	1.22558e-80	1	0.978
dut	LL0000009295	ENSDARG00000106529	0.844374	8	2.82176e-82	7.75955e-78	0.419	0.098
rplp0	LL0000023940	ENSDARG00000051783	0.557992	8	6.46449e-79	1.77767e-74	0.994	0.955
si:ch211-156b7.4	LL0000025188	ENSDARG00000101707	0.747677	8	2.72091e-77	7.48224e-73	0.503	0.144
pcna	LL0000021440	ENSDARG00000054155	1.10002	8	6.62215e-76	1.82102e-71	0.572	0.195
rps9	LL0000024008	ENSDARG00000011405	0.535618	8	6.70743e-76	1.84448e-71	0.986	0.932
cdca7a	LL0000005307	ENSDARG00000077620	0.646725	8	1.18976e-73	3.27172e-69	0.347	0.075
rps8a	LL0000024006	ENSDARG00000055996	0.51262	8	2.1824e-68	6.00138e-64	0.974	0.918
hmgb2b	LL0000012171	ENSDARG00000053990	0.804441	8	5.74507e-68	1.57984e-63	0.893	0.532
rpa2	LL0000023875	ENSDARG00000037188	0.633038	8	7.79927e-68	2.14472e-63	0.39	0.1
hells	LL0000012030	ENSDARG00000057738	0.555032	8	5.7205e-65	1.57308e-60	0.303	0.065
rps5	LL0000023992	ENSDARG00000043453	0.5173	8	3.40677e-64	9.36828e-60	0.954	0.908
chaf1a	LL0000005556	ENSDARG00000062152	0.514875	8	5.21801e-63	1.4349e-58	0.306	0.067
nme2b.1	LL0000020416	ENSDARG00000103791	0.548739	8	2.80384e-61	7.71027e-57	0.962	0.868
mcm4	LL0000018773	ENSDARG00000040041	0.597459	8	4.25752e-61	1.17077e-56	0.376	0.101
mcm6	LL0000018775	ENSDARG00000057683	0.534766	8	1.7657e-59	4.8555e-55	0.347	0.089
fabp7a	LL0000009941	ENSDARG00000007697	0.500171	8	1.14776e-56	3.15622e-52	0.705	0.344
nutf2l	LL0000020773	ENSDARG00000014499	0.660996	8	2.60008e-56	7.14997e-52	0.506	0.181
rpl27a	LL0000023915		0.521497	8	1.11686e-54	3.07124e-50	0.931	0.807
apex1	LL0000001162	ENSDARG00000045843	0.624116	8	1.11797e-54	3.07432e-50	0.474	0.16
hmga1a	LL0000012165	ENSDARG00000028335	0.800288	8	1.09425e-53	3.00907e-49	0.85	0.539
eif5a2	LL0000009539	ENSDARG00000056186	0.732516	8	7.23318e-52	1.98905e-47	0.754	0.449
pa2g4a	LL0000021193	ENSDARG00000039578	0.642363	8	3.01906e-49	8.3021e-45	0.535	0.222
snrpb	LL0000029075	ENSDARG00000011125	0.680685	8	4.29422e-49	1.18087e-44	0.728	0.388
selenoh	LL0000024398	ENSDARG00000093022	0.646578	8	9.95022e-49	2.73621e-44	0.659	0.324
nop10	LL0000020469	ENSDARG00000104227	0.667883	8	6.8345e-48	1.87942e-43	0.723	0.403
rpa3	LL0000023876	ENSDARG00000002613	0.570189	8	1.43569e-47	3.948e-43	0.379	0.12
nop58	LL0000020475	ENSDARG00000104353	0.557921	8	4.0388e-47	1.11063e-42	0.503	0.199
ccnd1	LL0000005166	ENSDARG00000101637	0.810392	8	3.52459e-46	9.69227e-42	0.48	0.192
snu13b	LL0000029091	ENSDARG00000023299	0.721573	8	7.15341e-46	1.96712e-41	0.624	0.323
ran	LL0000023166	ENSDARG00000057026	0.552245	8	1.94882e-44	5.35907e-40	0.884	0.699
rpl22l1	LL0000023909	ENSDARG00000010244	0.626773	8	1.29953e-43	3.57358e-39	0.827	0.634
npm1a	LL0000020532	ENSDARG00000014329	0.663929	8	3.57244e-42	9.82386e-38	0.691	0.39
fabp3	LL0000009939	ENSDARG00000023290	0.540402	8	5.4518e-42	1.49919e-37	0.803	0.496
cirbpa	LL0000005708	ENSDARG00000103672	0.612416	8	3.77854e-40	1.03906e-35	0.884	0.666
dkc1	LL0000008960	ENSDARG00000016484	0.521969	8	3.10298e-39	8.53288e-35	0.442	0.174
hmgn2	LL0000012179	ENSDARG00000099572	0.688057	8	4.18169e-38	1.14992e-33	0.925	0.778
khdrbs1a	LL0000013267	ENSDARG00000052856	0.527872	8	6.79685e-38	1.86907e-33	0.887	0.65
npm3	LL0000020536	ENSDARG00000103594	0.532621	8	1.28152e-36	3.52406e-32	0.494	0.22
sumo3b	LL0000029679	ENSDARG00000035993	0.522149	8	3.26309e-35	8.97317e-31	0.529	0.238
nop56	LL0000020474	ENSDARG00000012820	0.50347	8	8.92691e-35	2.45481e-30	0.65	0.359
sub1a	LL0000029641	ENSDARG00000053446	0.520525	8	1.10476e-34	3.03797e-30	0.639	0.342
banf1	LL0000001790	ENSDARG00000037009	0.592806	8	2.97229e-34	8.1735e-30	0.497	0.235
snrpd1	LL0000029078	ENSDARG00000011648	0.518392	8	7.24991e-34	1.99365e-29	0.566	0.285
setb	LL0000024528	ENSDARG00000003920	0.56431	8	2.52978e-33	6.95663e-29	0.74	0.459
cnbpa	LL0000005873	ENSDARG00000045776	0.548843	8	5.61738e-33	1.54472e-28	0.731	0.481
ncl	LL0000020067	ENSDARG00000002710	0.530067	8	1.4286e-32	3.92851e-28	0.746	0.495
snrpf	LL0000029083	ENSDARG00000105037	0.509339	8	1.99402e-32	5.48335e-28	0.578	0.292
fbl	LL0000010163	ENSDARG00000053912	0.501927	8	1.16354e-31	3.19963e-27	0.512	0.251
seta	LL0000024527	ENSDARG00000031495	0.58928	8	1.32475e-31	3.64293e-27	0.679	0.405
prmt1	LL0000022621	ENSDARG00000010246	0.526911	8	1.62327e-31	4.46383e-27	0.54	0.271
snrpg	LL0000029084	ENSDARG00000099667	0.547453	8	7.07192e-31	1.94471e-26	0.526	0.262
atp5if1a	LL0000001608	ENSDARG00000067975	0.507247	8	4.19553e-28	1.15373e-23	0.65	0.393
nap1l1	LL0000019978	ENSDARG00000101813	0.50352	8	1.50304e-27	4.1332e-23	0.656	0.405
ranbp1	LL0000023167	ENSDARG00000014817	0.519145	8	3.47673e-27	9.56065e-23	0.587	0.347
hmgb2a	LL0000012170	ENSDARG00000029722	0.508314	8	1.2423e-25	3.41621e-21	0.838	0.658
id1	LL0000012459	ENSDARG00000040764	0.529106	8	1.88764e-18	5.19082e-14	0.618	0.399
col1a1b	LL0000005995	ENSDARG00000035809	1.44666	9	1.67562e-121	4.60778e-117	0.763	0.229
pmp22a	LL0000022201	ENSDARG00000105223	1.06133	9	1.49349e-114	4.10696e-110	0.913	0.377
tnn	LL0000030756	ENSDARG00000024829	1.68154	9	2.35964e-112	6.48878e-108	0.35	0.054
serpinf1	LL0000024512	ENSDARG00000069048	1.04302	9	9.65743e-112	2.6557e-107	0.44	0.084
col1a2	LL0000005996	ENSDARG00000020007	1.42582	9	2.14129e-111	5.88835e-107	0.787	0.269
si:ch211-251b21.1	LL0000025837	ENSDARG00000007275	1.28493	9	4.27568e-103	1.17577e-98	0.853	0.389
postnb	LL0000022327	ENSDARG00000104267	1.51709	9	4.34308e-103	1.1943e-98	0.506	0.119
slco2b1	LL0000028900	ENSDARG00000054609	0.877023	9	1.41747e-98	3.89791e-94	0.344	0.058
rbp4	LL0000023321	ENSDARG00000101199	1.04347	9	5.37925e-98	1.47924e-93	0.94	0.506
cldn11a	LL0000005757	ENSDARG00000020031	1.2272	9	2.74158e-97	7.53908e-93	0.368	0.067
dcn	LL0000008724	ENSDARG00000012066	0.976846	9	5.57322e-96	1.53258e-91	0.626	0.18
cd248b	LL0000005230	ENSDARG00000077938	0.677334	9	8.21936e-90	2.26024e-85	0.257	0.035
col5a1	LL0000006015	ENSDARG00000012593	1.10446	9	4.18603e-89	1.15112e-84	0.659	0.212
ccl25b	LL0000005126	ENSDARG00000070873	1.84139	9	9.49618e-87	2.61135e-82	0.443	0.108
cyr61	LL0000008623	ENSDARG00000023062	1.20007	9	4.77619e-85	1.31341e-80	0.674	0.239
col5a2a	LL0000006016	ENSDARG00000031678	0.88396	9	3.42817e-81	9.42714e-77	0.512	0.138
col1a1a	LL0000005994	ENSDARG00000012405	0.88922	9	1.03401e-80	2.84343e-76	0.728	0.277
zgc:153704	LL0000038744	ENSDARG00000045979	1.21765	9	1.33835e-80	3.68033e-76	0.551	0.163
cyp2ad3	LL0000008574	ENSDARG00000022650	0.897713	9	1.85667e-71	5.10566e-67	0.722	0.303
col12a1a	LL0000005981	ENSDARG00000078322	1.06508	9	1.3521e-69	3.71815e-65	0.428	0.115
ca6	LL0000003952	ENSDARG00000056499	1.09003	9	6.72689e-69	1.84983e-64	0.266	0.049
fosab	LL0000010566	ENSDARG00000031683	0.806145	9	8.36777e-69	2.30105e-64	0.961	0.691
cebpd	LL0000005408	ENSDARG00000087303	0.83197	9	2.77864e-68	7.64099e-64	0.919	0.572
si:ch1073-291c23.2	LL0000024815	ENSDARG00000074869	0.739823	9	3.50989e-66	9.65185e-62	0.509	0.16
sparc	LL0000029233	ENSDARG00000019353	0.744646	9	1.05776e-64	2.90874e-60	0.826	0.386
jun	LL0000013044	ENSDARG00000043531	0.85706	9	1.15067e-63	3.16422e-59	0.844	0.475
fstb	LL0000010894	ENSDARG00000057992	0.737609	9	1.93303e-63	5.31563e-59	0.332	0.077
ntd5	LL0000020680	ENSDARG00000040944	0.866567	9	1.35709e-62	3.73187e-58	0.488	0.152
si:ch211-286o17.1	LL0000026026	ENSDARG00000100446	0.751032	9	3.69631e-59	1.01645e-54	0.5	0.169
matn4	LL0000018709	ENSDARG00000015947	0.650833	9	2.64741e-58	7.28011e-54	0.353	0.088
tmem176	LL0000030516	ENSDARG00000078659	0.694528	9	3.58187e-58	9.84979e-54	0.626	0.246
tgfbi	LL0000030228	ENSDARG00000071586	1.23081	9	4.76956e-58	1.31158e-53	0.383	0.109
cd28l	LL0000005234	ENSDARG00000069978	0.603202	9	2.88399e-56	7.93068e-52	0.41	0.118
ms4a17a.9	LL0000019626	ENSDARG00000094854	0.776172	9	2.7513e-55	7.56581e-51	0.482	0.165
eif4ebp3l	LL0000009529	ENSDARG00000041607	0.75492	9	4.81468e-55	1.32399e-50	0.841	0.516
ndnf	LL0000020091	ENSDARG00000062936	0.8222	9	1.55369e-54	4.2725e-50	0.371	0.106
plpp3	LL0000022153	ENSDARG00000059933	0.798811	9	3.773e-54	1.03754e-49	0.542	0.204
ier2a	LL0000012474	ENSDARG00000099195	0.852917	9	4.05689e-54	1.11561e-49	0.799	0.461
vwde	LL0000031954	ENSDARG00000103443	1.1567	9	4.50042e-54	1.23757e-49	0.311	0.077
igf2b	LL0000012531	ENSDARG00000033307	0.585321	9	1.15333e-53	3.17153e-49	0.374	0.105
socs3a	LL0000029136	ENSDARG00000025428	0.815883	9	1.56535e-53	4.30456e-49	0.808	0.455
mfap2	LL0000018921	ENSDARG00000059367	0.681222	9	2.05798e-53	5.65924e-49	0.56	0.211
hgd	LL0000012078	ENSDARG00000058005	0.561333	9	4.74671e-52	1.3053e-47	0.584	0.222
junba	LL0000013045	ENSDARG00000074378	0.721988	9	2.89673e-51	7.96571e-47	0.835	0.513
tfpia	LL0000030215	ENSDARG00000034718	0.527405	9	4.91102e-51	1.35048e-46	0.275	0.063
col11a1b	LL0000005979	ENSDARG00000009014	0.92287	9	6.39442e-51	1.7584e-46	0.326	0.088
timp4.3	LL0000030335	ENSDARG00000100795	0.655133	9	1.22821e-50	3.37746e-46	0.353	0.098
lpl	LL0000018300	ENSDARG00000087697	0.995632	9	1.48704e-49	4.08921e-45	0.506	0.193
cdh11	LL0000005316	ENSDARG00000021442	0.750932	9	9.39952e-49	2.58477e-44	0.392	0.119
lxn	LL0000018460	ENSDARG00000043102	0.684357	9	1.42372e-48	3.91508e-44	0.644	0.288
bhmt	LL0000001893	ENSDARG00000013430	0.66758	9	6.92523e-48	1.90437e-43	0.784	0.401
reck	LL0000023377	ENSDARG00000090039	0.633232	9	7.35086e-46	2.02141e-41	0.353	0.108
zgc:162730	LL0000038847	ENSDARG00000103720	0.712552	9	1.44631e-45	3.97721e-41	0.856	0.513
pdgfra	LL0000021524	ENSDARG00000070494	0.5328	9	4.70535e-44	1.29392e-39	0.275	0.071
boc	LL0000001974	ENSDARG00000074335	0.59651	9	1.78442e-43	4.90697e-39	0.413	0.142
aoc2	LL0000001113	ENSDARG00000014646	0.501486	9	6.08282e-43	1.67271e-38	0.5	0.195
sdc4	LL0000024337	ENSDARG00000059906	0.538882	9	2.34695e-42	6.45388e-38	0.814	0.46
cyp3c1	LL0000008606	ENSDARG00000015575	0.636957	9	6.15315e-42	1.69205e-37	0.503	0.208
zfp36l2	LL0000038418	ENSDARG00000021806	0.551991	9	2.79909e-40	7.69721e-36	0.413	0.151
mych	LL0000019810	ENSDARG00000077473	0.726216	9	3.00016e-40	8.25013e-36	0.611	0.307
krt18b	LL0000013462	ENSDARG00000028618	0.516666	9	3.83012e-39	1.05325e-34	0.617	0.281
btg2	LL0000002063	ENSDARG00000020298	0.565754	9	1.48935e-38	4.09557e-34	0.829	0.534
nid1a	LL0000020304	ENSDARG00000068710	0.630654	9	5.93821e-38	1.63295e-33	0.338	0.11
XLOC-044191	LL0000038171		0.703245	9	9.03737e-35	2.48519e-30	0.707	0.411
angptl4	LL0000000987	ENSDARG00000035859	0.567237	9	1.13909e-33	3.13237e-29	0.467	0.204
twist1a	LL0000031388	ENSDARG00000030402	0.703704	9	2.98982e-33	8.22171e-29	0.323	0.113
col2a1b	LL0000006006	ENSDARG00000011407	0.818852	9	5.69356e-33	1.56567e-28	0.383	0.153
fmoda	LL0000010422	ENSDARG00000044895	0.697561	9	6.27027e-33	1.72426e-28	0.383	0.148
slc38a5b	LL0000028740	ENSDARG00000014587	0.590883	9	6.40395e-33	1.76102e-28	0.572	0.292
wnt11r	LL0000032086	ENSDARG00000014796	0.680358	9	2.27069e-32	6.24416e-28	0.275	0.086
sfrp2	LL0000024566	ENSDARG00000070050	0.593891	9	8.9918e-32	2.47265e-27	0.269	0.084
fstl3	LL0000010897	ENSDARG00000025670	0.643257	9	2.61839e-30	7.20031e-26	0.341	0.125
sult1st1	LL0000029655	ENSDARG00000028275	0.528155	9	2.74918e-30	7.55998e-26	0.335	0.129
rhag	LL0000023629	ENSDARG00000019253	1.02525	9	1.12402e-29	3.09094e-25	0.29	0.103
slc7a8a	LL0000028868	ENSDARG00000075831	0.751609	9	2.11683e-29	5.82107e-25	0.347	0.139
mmp2	LL0000019407	ENSDARG00000017676	0.537043	9	1.97641e-28	5.43493e-24	0.425	0.182
angptl1a	LL0000000982	ENSDARG00000012071	0.626157	9	1.82598e-27	5.02127e-23	0.26	0.088
npm1a	LL0000020532	ENSDARG00000014329	0.566302	9	3.60064e-26	9.90141e-22	0.623	0.392
si:dkey-11f4.14	LL0000026687	ENSDARG00000098461	0.517104	9	1.04421e-24	2.87148e-20	0.497	0.255
egr1	LL0000009456	ENSDARG00000037421	0.517301	9	1.06518e-24	2.92913e-20	0.551	0.297
si:dkey-239h2.3	LL0000027278	ENSDARG00000092033	0.558797	9	4.40418e-23	1.2111e-18	0.47	0.254
junbb	LL0000013046	ENSDARG00000104773	0.516906	9	4.78806e-22	1.31667e-17	0.422	0.213
mknk2b	LL0000019353	ENSDARG00000015164	0.555259	9	2.89359e-21	7.9571e-17	0.65	0.425
slc3a2b	LL0000028761	ENSDARG00000037012	0.64002	9	8.43106e-20	2.31846e-15	0.677	0.473
f3b	LL0000009918	ENSDARG00000005673	0.586944	9	8.41997e-15	2.31541e-10	0.272	0.13
cxcl12a	LL0000008486	ENSDARG00000037116	0.60708	9	5.35474e-13	1.4725e-08	0.287	0.145
crip1	LL0000007317	ENSDARG00000053858	0.526952	9	1.38875e-07	0.00381893	0.35	0.241
her4.2	LL0000012050	ENSDARG00000094426	2.63037	10	0	0	0.931	0.074
XLOC-003692	LL0000032645		2.4344	10	0	0	0.758	0.033
her15.1	LL0000012046	ENSDARG00000054562	2.41987	10	0	0	0.947	0.098
her4.1	LL0000012049	ENSDARG00000056732	2.2	10	0	0	0.764	0.05
abhd6a	LL0000000097	ENSDARG00000060756	2.06655	10	0	0	0.601	0.015
her4.4	LL0000012052	ENSDARG00000009822	1.87128	10	0	0	0.742	0.051
XLOC-003689	LL0000032643		1.82505	10	0	0	0.566	0.019
dla	LL0000008966	ENSDARG00000010791	1.74084	10	0	0	0.67	0.04
XLOC-003690	LL0000032644		1.63403	10	0	0	0.682	0.051
her12	LL0000012044	ENSDARG00000032963	1.42233	10	0	0	0.469	0.024
sox3	LL0000029194	ENSDARG00000053569	1.37877	10	0	0	0.635	0.053
her2	LL0000012047	ENSDARG00000038205	1.35131	10	0	0	0.459	0.017
ascl1b	LL0000001473	ENSDARG00000101628	1.14281	10	0	0	0.381	0.019
sox19a	LL0000029186	ENSDARG00000010770	1.12332	10	0	0	0.519	0.028
si:ch73-21g5.7	LL0000026318	ENSDARG00000093156	1.05575	10	0	0	0.261	0.006
BX664610.1	LL0000003434	ENSDARG00000095557	0.917517	10	5.50851e-277	1.51479e-272	0.428	0.029
si:ch211-212k18.5	LL0000025548	ENSDARG00000103316	0.74687	10	3.25473e-255	8.9502e-251	0.377	0.025
si:ch73-30b17.2	LL0000026444		0.792661	10	5.04743e-241	1.38799e-236	0.377	0.026
CU634008.1	LL0000008125	ENSDARG00000100430	1.07281	10	1.72001e-238	4.72987e-234	0.513	0.051
ascl1a	LL0000001472	ENSDARG00000038386	0.922215	10	7.04374e-233	1.93696e-228	0.365	0.025
LOC798783	LL0000018258		1.6163	10	4.25819e-229	1.17096e-224	0.283	0.015
CU467822.1	LL0000007981	ENSDARG00000101584	1.06396	10	1.12434e-207	3.09181e-203	0.566	0.072
CR848047.1	LL0000007048	ENSDARG00000095906	1.11668	10	7.10174e-197	1.95291e-192	0.374	0.033
sb:cb81	LL0000024233	ENSDARG00000040503	1.19868	10	6.98969e-186	1.92209e-181	0.5	0.065
gadd45gb.1	LL0000011091	ENSDARG00000016725	0.937633	10	3.48696e-183	9.58878e-179	0.308	0.023
lfng	LL0000013610	ENSDARG00000037879	1.17756	10	2.70237e-180	7.43126e-176	0.638	0.11
pou3f3b	LL0000022337	ENSDARG00000095896	0.74587	10	5.8039e-172	1.59601e-167	0.415	0.046
zgc:165461	LL0000038884	ENSDARG00000040162	0.690724	10	1.79866e-167	4.94614e-163	0.39	0.041
notch3	LL0000020486	ENSDARG00000052139	0.862437	10	4.31768e-161	1.18732e-156	0.447	0.058
atp1b4	LL0000001590	ENSDARG00000053262	0.588269	10	2.67019e-160	7.34275e-156	0.437	0.053
notch1a	LL0000020483	ENSDARG00000103554	0.63434	10	3.79738e-159	1.04424e-154	0.302	0.027
notch1b	LL0000020484	ENSDARG00000052094	0.711129	10	3.43339e-154	9.44148e-150	0.296	0.026
ccnd1	LL0000005166	ENSDARG00000101637	1.46285	10	2.67327e-146	7.35124e-142	0.704	0.186
msi1	LL0000019639	ENSDARG00000010710	0.761803	10	2.95783e-143	8.13375e-139	0.519	0.085
en2b	LL0000009634	ENSDARG00000038868	0.659362	10	1.46111e-137	4.01789e-133	0.318	0.033
sox11b	LL0000029180	ENSDARG00000095743	1.21011	10	1.09733e-136	3.01754e-132	0.629	0.132
pou3f1	LL0000022333	ENSDARG00000009823	0.821232	10	5.07341e-136	1.39514e-131	0.453	0.067
marcksb	LL0000018674	ENSDARG00000008803	0.979411	10	2.93171e-133	8.0619e-129	0.777	0.202
zgc:110540	LL0000038518	ENSDARG00000054929	1.01255	10	9.42171e-132	2.59088e-127	0.393	0.056
pou3f3a	LL0000022336	ENSDARG00000042032	0.51249	10	9.30816e-129	2.55965e-124	0.314	0.035
hmga1a	LL0000012165	ENSDARG00000028335	1.50339	10	3.08534e-124	8.48437e-120	0.94	0.537
lig1	LL0000013663	ENSDARG00000060041	0.781521	10	4.18987e-122	1.15217e-117	0.443	0.076
dut	LL0000009295	ENSDARG00000106529	1.12177	10	6.39225e-119	1.7578e-114	0.491	0.097
slbp	LL0000028469	ENSDARG00000100558	0.656668	10	3.48808e-117	9.59188e-113	0.33	0.043
asf1ba	LL0000001474	ENSDARG00000101037	0.58335	10	1.45764e-116	4.00836e-112	0.296	0.035
hells	LL0000012030	ENSDARG00000057738	0.838178	10	8.73662e-116	2.40248e-111	0.393	0.063
hmgb2b	LL0000012171	ENSDARG00000053990	1.39699	10	3.6037e-115	9.90983e-111	0.931	0.532
si:ch211-222l21.1	LL0000025644	ENSDARG00000076532	1.50403	10	6.5883e-114	1.81172e-109	0.937	0.486
hmgn2	LL0000012179	ENSDARG00000099572	1.65649	10	5.1531e-113	1.41705e-108	0.987	0.777
mbd3b	LL0000018722	ENSDARG00000061810	0.831834	10	2.27576e-112	6.25811e-108	0.582	0.13
si:ch211-137a8.4	LL0000025074	ENSDARG00000078748	0.905555	10	2.74702e-111	7.55403e-107	0.667	0.172
si:ch211-156b7.4	LL0000025188	ENSDARG00000101707	1.04389	10	3.34753e-109	9.20537e-105	0.572	0.143
hmgb1b	LL0000012169	ENSDARG00000030479	1.14358	10	1.3378e-108	3.6788e-104	0.921	0.425
stmn1a	LL0000029569	ENSDARG00000004169	1.25183	10	3.88975e-108	1.06964e-103	0.792	0.293
LOC100330864	LL0000039875	ENSDARG00000020711	1.48372	10	9.86723e-108	2.71339e-103	0.333	0.049
si:ch211-288g17.3	LL0000026030	ENSDARG00000070959	1.13329	10	9.91601e-107	2.7268e-102	0.849	0.34
FO082781.1	LL0000010452	ENSDARG00000076638	0.797504	10	4.08341e-106	1.1229e-101	0.55	0.123
pax7a	LL0000021327	ENSDARG00000100398	0.56293	10	7.75853e-105	2.13352e-100	0.27	0.032
atp1a1b	LL0000001580	ENSDARG00000019856	0.511904	10	2.09612e-103	5.76413e-99	0.453	0.085
mycn	LL0000019813	ENSDARG00000006837	0.851381	10	5.93381e-103	1.63174e-98	0.509	0.113
mdka	LL0000018805	ENSDARG00000036036	1.04882	10	2.80758e-99	7.72056e-95	0.83	0.331
gpm6bb	LL0000011574	ENSDARG00000001676	0.651209	10	1.22284e-96	3.36268e-92	0.387	0.068
nova2	LL0000020494	ENSDARG00000017673	0.723631	10	1.07639e-95	2.95997e-91	0.767	0.233
slc6a15	LL0000028830	ENSDARG00000062821	0.528791	10	6.27794e-95	1.72637e-90	0.34	0.053
cirbpa	LL0000005708	ENSDARG00000103672	0.991933	10	7.20837e-94	1.98223e-89	0.943	0.665
h2afvb	LL0000011901	ENSDARG00000116491	1.13703	10	7.37363e-90	2.02768e-85	0.887	0.495
lbr	LL0000013553	ENSDARG00000014013	0.869756	10	8.70577e-90	2.394e-85	0.497	0.119
marcksa	LL0000018673	ENSDARG00000004049	0.646732	10	1.56555e-88	4.3051e-84	0.516	0.122
hes6	LL0000012068	ENSDARG00000019335	0.613055	10	1.54885e-86	4.25917e-82	0.396	0.077
pcna	LL0000021440	ENSDARG00000054155	1.34435	10	3.13942e-85	8.6331e-81	0.597	0.195
hmgb2a	LL0000012170	ENSDARG00000029722	1.36163	10	3.75075e-84	1.03142e-79	0.947	0.656
rbbp4	LL0000023255	ENSDARG00000029058	0.747757	10	2.28701e-83	6.28905e-79	0.497	0.126
khdrbs1a	LL0000013267	ENSDARG00000052856	0.847702	10	2.61246e-82	7.18399e-78	0.956	0.649
tmpob	LL0000030674	ENSDARG00000022978	0.67933	10	6.45108e-81	1.77398e-76	0.475	0.116
mcm7	LL0000018777	ENSDARG00000101180	0.859187	10	2.37022e-79	6.51788e-75	0.535	0.158
cdca7a	LL0000005307	ENSDARG00000077620	0.839185	10	1.27713e-78	3.51199e-74	0.362	0.075
zic3	LL0000039305	ENSDARG00000071497	0.586892	10	9.29807e-78	2.55688e-73	0.33	0.061
tgif1	LL0000030235	ENSDARG00000059337	0.694783	10	1.00857e-77	2.77346e-73	0.503	0.135
h2afx	LL0000011902	ENSDARG00000029406	0.730692	10	1.93496e-77	5.32095e-73	0.384	0.083
cks1b	LL0000005732	ENSDARG00000007971	0.524809	10	2.43849e-77	6.70561e-73	0.296	0.05
rpa3	LL0000023876	ENSDARG00000002613	0.774308	10	6.90817e-77	1.89968e-72	0.459	0.119
nasp	LL0000019993	ENSDARG00000039208	0.583065	10	1.47463e-76	4.05509e-72	0.371	0.079
apex1	LL0000001162	ENSDARG00000045843	0.607286	10	2.56274e-76	7.04728e-72	0.55	0.159
rrm1	LL0000024032	ENSDARG00000014017	0.583841	10	6.61582e-76	1.81929e-71	0.302	0.054
hnrnpa0b	LL0000012204	ENSDARG00000036162	0.835559	10	1.49924e-74	4.12276e-70	0.899	0.502
fabp7a	LL0000009941	ENSDARG00000007697	1.27309	10	5.14885e-74	1.41588e-69	0.767	0.343
seta	LL0000024527	ENSDARG00000031495	0.953746	10	2.49417e-73	6.85873e-69	0.802	0.403
chaf1a	LL0000005556	ENSDARG00000062152	0.553952	10	2.56469e-72	7.05264e-68	0.33	0.067
h3f3a	LL0000039823	ENSDARG00000020504	1.07194	10	5.9532e-71	1.63707e-66	0.896	0.574
ran	LL0000023166	ENSDARG00000057026	0.694917	10	8.00851e-71	2.20226e-66	0.953	0.698
uck2b	LL0000031547	ENSDARG00000022213	0.520544	10	3.90012e-70	1.07249e-65	0.377	0.086
h2afva	LL0000011900	ENSDARG00000068820	0.667868	10	1.60625e-69	4.41702e-65	0.726	0.284
hnrnpabb	LL0000012210	ENSDARG00000099865	0.831318	10	1.69435e-69	4.65929e-65	0.846	0.454
sinhcafl	LL0000028422	ENSDARG00000095007	0.702201	10	8.09785e-69	2.22683e-64	0.61	0.202
parp1	LL0000021292	ENSDARG00000019529	0.524095	10	1.18594e-68	3.26123e-64	0.349	0.077
tuba1a	LL0000031346	ENSDARG00000001889	0.623022	10	1.54128e-68	4.23837e-64	0.626	0.198
cbx2	LL0000004997	ENSDARG00000044938	0.54681	10	6.6518e-67	1.82918e-62	0.355	0.08
tmsb	LL0000030688	ENSDARG00000054911	0.533676	10	2.85406e-66	7.84838e-62	0.447	0.114
tfdp2	LL0000030207	ENSDARG00000042835	0.624805	10	9.90394e-66	2.72349e-61	0.305	0.062
snrpd1	LL0000029078	ENSDARG00000011648	0.763339	10	1.46628e-64	4.03213e-60	0.679	0.283
si:ch73-281n10.2	LL0000026414	ENSDARG00000097102	0.845949	10	3.41938e-63	9.40294e-59	0.95	0.72
snrpb	LL0000029075	ENSDARG00000011125	0.73044	10	3.69158e-63	1.01515e-58	0.783	0.387
setb	LL0000024528	ENSDARG00000003920	0.754847	10	4.2019e-63	1.15548e-58	0.827	0.457
hmgb1a	LL0000012168	ENSDARG00000099175	0.939553	10	8.22648e-63	2.2622e-58	0.858	0.489
rrm2	LL0000040133	ENSDARG00000078069	1.08856	10	1.03087e-62	2.8348e-58	0.264	0.05
gas1b	LL0000011148	ENSDARG00000067984	0.585805	10	3.71161e-62	1.02065e-57	0.299	0.062
sumo3b	LL0000029679	ENSDARG00000035993	0.802001	10	5.05578e-62	1.39029e-57	0.61	0.237
syncrip	LL0000029743	ENSDARG00000040184	0.666998	10	5.65921e-62	1.55623e-57	0.821	0.421
fsta	LL0000010893	ENSDARG00000052846	0.654688	10	2.32588e-61	6.39593e-57	0.277	0.054
tubb2b	LL0000031358	ENSDARG00000098591	1.00994	10	8.02287e-61	2.20621e-56	0.752	0.368
ptmab	LL0000022860	ENSDARG00000101766	0.764829	10	1.70347e-60	4.68438e-56	0.997	0.85
snrpe	LL0000029082	ENSDARG00000033175	0.749803	10	1.00919e-59	2.77517e-55	0.689	0.309
rpa2	LL0000023875	ENSDARG00000037188	0.606221	10	7.55236e-59	2.07682e-54	0.381	0.101
asf1bb	LL0000001475	ENSDARG00000043713	0.516417	10	1.40392e-58	3.86064e-54	0.346	0.084
ewsr1b	LL0000039796	ENSDARG00000020465	0.599287	10	2.00245e-57	5.50654e-53	0.604	0.234
snrpg	LL0000029084	ENSDARG00000099667	0.681199	10	2.55149e-57	7.01634e-53	0.629	0.26
rpa1	LL0000023874	ENSDARG00000003938	0.508954	10	5.41816e-57	1.48994e-52	0.352	0.09
sox11a	LL0000029179	ENSDARG00000077811	0.647577	10	2.21906e-56	6.10219e-52	0.5	0.159
hnrnpaba	LL0000012209	ENSDARG00000007960	0.624294	10	3.09324e-56	8.50611e-52	0.95	0.696
hp1bp3	LL0000012290	ENSDARG00000044669	0.519887	10	1.16408e-55	3.2011e-51	0.736	0.315
lrrn1	LL0000018410	ENSDARG00000060115	0.676171	10	1.88897e-55	5.19449e-51	0.28	0.06
banf1	LL0000001790	ENSDARG00000037009	0.826489	10	3.37232e-55	9.27354e-51	0.566	0.234
anp32b	LL0000001085	ENSDARG00000023330	0.701309	10	3.7225e-55	1.02365e-50	0.651	0.282
nucks1a	LL0000020711	ENSDARG00000078473	0.569115	10	4.13108e-55	1.13601e-50	0.736	0.322
rtca	LL0000024069	ENSDARG00000002215	0.60621	10	6.89222e-55	1.89529e-50	0.286	0.064
hnrnpa0a	LL0000012203	ENSDARG00000089302	0.51011	10	5.18169e-54	1.42491e-49	0.66	0.255
hdac1	LL0000011987	ENSDARG00000015427	0.622491	10	2.68224e-53	7.37589e-49	0.689	0.304
snrpd3l	LL0000029081	ENSDARG00000076283	0.56165	10	1.4405e-52	3.96123e-48	0.582	0.226
insm1a	LL0000012790	ENSDARG00000091756	0.81146	10	1.74505e-52	4.7987e-48	0.27	0.058
smc1al	LL0000028961	ENSDARG00000058203	0.529932	10	1.76657e-52	4.8579e-48	0.557	0.205
hmgb3a	LL0000012172	ENSDARG00000056725	0.544167	10	5.60871e-52	1.54234e-47	0.852	0.428
ilf2	LL0000012693	ENSDARG00000014591	0.551647	10	7.91876e-52	2.17758e-47	0.594	0.231
hmgn6	LL0000012181	ENSDARG00000087636	0.622073	10	1.12898e-51	3.10458e-47	0.947	0.674
mcm3	LL0000018770	ENSDARG00000024204	0.562541	10	4.0907e-51	1.1249e-46	0.314	0.079
rad21a	LL0000023123	ENSDARG00000006092	0.679075	10	1.29541e-50	3.56226e-46	0.623	0.269
fen1	LL0000010254	ENSDARG00000011404	0.559765	10	3.30964e-50	9.10119e-46	0.296	0.073
cirbpb	LL0000005709	ENSDARG00000013351	0.585814	10	7.04896e-50	1.93839e-45	0.984	0.833
rbm4.3	LL0000023298	ENSDARG00000022129	0.646684	10	1.60861e-49	4.42352e-45	0.764	0.397
si:dkey-56m19.5	LL0000027754	ENSDARG00000068432	0.582536	10	3.42648e-49	9.42249e-45	0.491	0.165
ddx39ab	LL0000008782	ENSDARG00000015111	0.610461	10	6.84349e-49	1.88189e-44	0.563	0.229
mibp	LL0000019006	ENSDARG00000101362	0.633074	10	2.31821e-48	6.37485e-44	0.374	0.108
mcm6	LL0000018775	ENSDARG00000057683	0.581276	10	4.28129e-48	1.17731e-43	0.327	0.09
si:dkey-42i9.4	LL0000027656	ENSDARG00000008049	0.628788	10	7.03428e-48	1.93436e-43	0.686	0.321
snrpf	LL0000029083	ENSDARG00000105037	0.609742	10	1.14039e-47	3.13595e-43	0.635	0.291
mcm5	LL0000018774	ENSDARG00000019507	0.607656	10	1.05315e-46	2.89607e-42	0.302	0.079
cbx3a	LL0000004998	ENSDARG00000003860	0.59327	10	2.06216e-46	5.67075e-42	0.67	0.323
elavl3	LL0000009552	ENSDARG00000014420	0.982348	10	3.48823e-46	9.59228e-42	0.494	0.179
sub1a	LL0000029641	ENSDARG00000053446	0.627864	10	1.37318e-45	3.7761e-41	0.682	0.341
adssl	LL0000000426	ENSDARG00000012399	0.5004	10	1.51206e-45	4.15801e-41	0.355	0.108
si:ch73-1a9.3	LL0000026297	ENSDARG00000103919	0.576113	10	1.77373e-45	4.87757e-41	0.984	0.835
mcm4	LL0000018773	ENSDARG00000040041	0.615364	10	4.22562e-45	1.162e-40	0.343	0.103
sumo3a	LL0000029678	ENSDARG00000028119	0.629695	10	6.93864e-45	1.90806e-40	0.777	0.445
cdkn1ca	LL0000005381	ENSDARG00000010878	0.74279	10	9.87923e-45	2.71669e-40	0.27	0.067
ppm1g	LL0000022399	ENSDARG00000075559	0.530595	10	1.6593e-44	4.5629e-40	0.387	0.124
lsm7	LL0000018437	ENSDARG00000058328	0.523378	10	1.29729e-43	3.56742e-39	0.654	0.302
anp32a	LL0000001084	ENSDARG00000006487	0.515817	10	1.69693e-43	4.66639e-39	0.84	0.513
khsrp	LL0000013273	ENSDARG00000026489	0.519537	10	3.26632e-43	8.98206e-39	0.522	0.213
snrpd2	LL0000029079	ENSDARG00000040440	0.544304	10	6.10665e-43	1.67927e-38	0.629	0.291
rpl22l1	LL0000023909	ENSDARG00000010244	0.50672	10	5.73862e-41	1.57806e-36	0.921	0.632
taf15	LL0000029919	ENSDARG00000070019	0.522411	10	7.49734e-41	2.06169e-36	0.522	0.218
hnrnpa0l	LL0000039827	ENSDARG00000036161	0.557504	10	3.24255e-40	8.91669e-36	0.94	0.714
selenoh	LL0000024398	ENSDARG00000093022	0.633761	10	1.11231e-39	3.05873e-35	0.635	0.325
tubb4b	LL0000031359	ENSDARG00000002344	0.548448	10	7.55301e-39	2.077e-34	0.928	0.699
mcm2	LL0000018769	ENSDARG00000102798	0.553982	10	1.83484e-37	5.04563e-33	0.308	0.095
boc	LL0000001974	ENSDARG00000074335	0.509175	10	5.04331e-36	1.38686e-31	0.396	0.143
nfia	LL0000020254	ENSDARG00000062420	0.825399	10	1.19487e-35	3.28576e-31	0.336	0.115
eif5a2	LL0000009539	ENSDARG00000056186	0.51551	10	3.74676e-35	1.03032e-30	0.742	0.451
id1	LL0000012459	ENSDARG00000040764	0.774864	10	1.5181e-33	4.17463e-29	0.692	0.397
nutf2l	LL0000020773	ENSDARG00000014499	0.552544	10	2.44566e-33	6.72533e-29	0.431	0.184
tuba8l4	LL0000031355	ENSDARG00000006260	0.694718	10	1.95937e-28	5.38806e-24	0.645	0.406
her6	LL0000012054	ENSDARG00000006514	0.502312	10	6.83972e-19	1.88085e-14	0.352	0.162
rbp5	LL0000023323	ENSDARG00000101481	0.571014	10	3.17714e-15	8.73682e-11	0.296	0.146
cldni	LL0000005786	ENSDARG00000054616	3.1331	11	0	0	0.926	0.055
cxl34b.11	LL0000008505	ENSDARG00000092283	2.81493	11	0	0	0.845	0.026
cfl1l	LL0000005533	ENSDARG00000012972	2.66766	11	0	0	0.989	0.144
apoeb	LL0000001193	ENSDARG00000040295	2.4937	11	0	0	0.841	0.099
lgals1l1	LL0000013614	ENSDARG00000088711	2.36208	11	0	0	0.682	0.044
cldn1	LL0000005753	ENSDARG00000040045	2.2647	11	0	0	0.862	0.021
epcam	LL0000009697	ENSDARG00000040534	2.21858	11	0	0	0.975	0.15
mmp30	LL0000019417	ENSDARG00000045887	2.13268	11	0	0	0.756	0.013
spaca4l	LL0000029222	ENSDARG00000116617	2.04733	11	0	0	0.788	0.024
epgn	LL0000009703	ENSDARG00000104992	1.95554	11	0	0	0.753	0.012
si:ch1073-406l10.2	LL0000024846	ENSDARG00000089645	1.89553	11	0	0	0.763	0.03
thy1	LL0000030299	ENSDARG00000035018	1.52086	11	0	0	0.576	0.026
hbegfa	LL0000011959	ENSDARG00000075121	1.31962	11	0	0	0.728	0.068
spint1a	LL0000029289	ENSDARG00000102332	1.30452	11	0	0	0.753	0.053
zgc:92380	LL0000039282	ENSDARG00000041339	1.27931	11	0	0	0.71	0.027
ptgs2a	LL0000022840	ENSDARG00000004539	1.18028	11	0	0	0.636	0.053
cckb	LL0000005118	ENSDARG00000100052	1.14893	11	0	0	0.512	0.027
tmem238a	LL0000030576	ENSDARG00000093684	1.14747	11	0	0	0.724	0.047
tp63	LL0000030854	ENSDARG00000044356	1.08272	11	0	0	0.678	0.015
col4a5	LL0000006013	ENSDARG00000052063	1.08136	11	0	0	0.654	0.032
si:dkey-102c8.3	LL0000026605	ENSDARG00000113572	1.07681	11	0	0	0.625	0.006
ecrg4b	LL0000009366	ENSDARG00000088717	1.0611	11	0	0	0.576	0.004
itgb4	LL0000012945	ENSDARG00000028507	1.04679	11	0	0	0.59	0.017
col14a1b	LL0000005985	ENSDARG00000076623	0.991348	11	0	0	0.569	0.009
XLOC-001672	LL0000032399		0.982185	11	0	0	0.587	0.041
gstm.3	LL0000011815	ENSDARG00000088116	0.97501	11	0	0	0.382	0.015
gpa33a	LL0000011530	ENSDARG00000100223	0.964465	11	0	0	0.611	0.036
arhgef5	LL0000001325		0.952521	11	0	0	0.633	0.045
zgc:101810	LL0000038468	ENSDARG00000004658	0.891041	11	0	0	0.53	0.006
dnase1l4.1	LL0000009098	ENSDARG00000015123	0.879217	11	0	0	0.65	0.053
myh9a	LL0000019831	ENSDARG00000063295	0.850244	11	0	0	0.601	0.041
rac2	LL0000023115	ENSDARG00000038010	0.83933	11	0	0	0.661	0.049
mpzl2b	LL0000019511	ENSDARG00000027345	0.812452	11	0	0	0.565	0.037
itga6b	LL0000012929	ENSDARG00000069946	0.726075	11	0	0	0.498	0.021
col4a6	LL0000006014	ENSDARG00000052061	0.725342	11	0	0	0.544	0.035
lama5	LL0000013508	ENSDARG00000058543	0.696676	11	0	0	0.371	0.016
cyp2k8	LL0000008587	ENSDARG00000101190	0.632671	11	0	0	0.389	0.015
RGS13-1-of-many	LL0000023604	ENSDARG00000102059	0.609512	11	0	0	0.304	0.004
sema3b	LL0000024423	ENSDARG00000011672	0.553171	11	0	0	0.449	0.02
itgb1b.1	LL0000012939	ENSDARG00000053232	0.55085	11	0	0	0.375	0.01
fermt1	LL0000010260	ENSDARG00000052652	0.528654	11	0	0	0.343	0.009
zgc:86896	LL0000039260	ENSDARG00000090369	0.521801	11	0	0	0.403	0.007
col17a1a	LL0000005989	ENSDARG00000069415	0.513731	11	0	0	0.325	0.001
plek2	LL0000022099	ENSDARG00000012789	0.513263	11	0	0	0.3	0.002
XLOC-015224	LL0000034111		0.500953	11	0	0	0.353	0.003
aqp3a	LL0000001214	ENSDARG00000003808	1.55616	11	3.56618e-303	9.80664e-299	0.809	0.096
fam49ba	LL0000010086	ENSDARG00000020929	0.557203	11	9.28721e-299	2.55389e-294	0.463	0.028
col18a1a	LL0000005991	ENSDARG00000036558	0.81996	11	5.24102e-297	1.44123e-292	0.548	0.042
si:ch211-166a6.5	LL0000025272	ENSDARG00000079745	1.40334	11	3.54615e-290	9.75155e-286	0.717	0.084
rhbg	LL0000023638	ENSDARG00000009018	1.56656	11	3.59243e-284	9.87883e-280	0.636	0.062
si:dkey-33c14.3	LL0000027597	ENSDARG00000097118	3.50313	11	1.85716e-282	5.107e-278	0.876	0.165
col11a1a	LL0000005978	ENSDARG00000026165	1.36624	11	1.72636e-281	4.74732e-277	0.746	0.088
padi2	LL0000021208	ENSDARG00000044167	0.530343	11	2.0252e-276	5.56911e-272	0.403	0.023
wu:fa03e10	LL0000032121		1.36304	11	4.19426e-264	1.15338e-259	0.615	0.061
cdh1	LL0000005314	ENSDARG00000102750	0.752465	11	7.77025e-256	2.13674e-251	0.541	0.048
XLOC-039737	LL0000037279		0.539404	11	7.12375e-253	1.95896e-248	0.297	0.013
spint1b	LL0000029290	ENSDARG00000012467	0.596115	11	2.10855e-252	5.7983e-248	0.371	0.022
CR855337.1	LL0000007133	ENSDARG00000094295	0.532921	11	2.83849e-248	7.80557e-244	0.35	0.019
pak2a	LL0000021222	ENSDARG00000068177	0.683878	11	1.99554e-242	5.48755e-238	0.565	0.056
itm2bb	LL0000012963	ENSDARG00000041505	0.948188	11	3.72898e-242	1.02543e-237	0.693	0.089
si:dkey-183i3.5	LL0000026921	ENSDARG00000056248	3.62896	11	1.32204e-239	3.63547e-235	0.682	0.101
igfbp7	LL0000012548	ENSDARG00000104138	0.81685	11	3.60515e-233	9.91379e-229	0.587	0.061
s100a10b	LL0000024145	ENSDARG00000025254	1.72325	11	6.8706e-233	1.88935e-228	0.943	0.198
fosl1a	LL0000010568	ENSDARG00000015355	1.16107	11	2.42232e-231	6.66115e-227	0.746	0.108
zgc:77439	LL0000039235	ENSDARG00000039211	0.935743	11	7.79738e-230	2.1442e-225	0.576	0.065
tmsb1	LL0000030689	ENSDARG00000104181	2.50879	11	1.55491e-229	4.27586e-225	0.993	0.322
si:ch211-264f5.6	LL0000025910	ENSDARG00000079372	0.646945	11	2.81362e-224	7.73716e-220	0.428	0.034
pfn1	LL0000021643	ENSDARG00000088091	2.50063	11	2.4054e-211	6.61461e-207	0.986	0.353
zgc:136930	LL0000038682	ENSDARG00000055192	3.63993	11	2.87648e-208	7.91003e-204	0.767	0.156
aep1	LL0000000431	ENSDARG00000039099	0.861555	11	6.98742e-208	1.92147e-203	0.29	0.016
oclna	LL0000020808	ENSDARG00000005108	0.622324	11	2.02436e-202	5.56679e-198	0.456	0.043
bcam	LL0000001820	ENSDARG00000090190	0.758963	11	2.89776e-200	7.96854e-196	0.509	0.054
pxna	LL0000022966	ENSDARG00000088590	0.579219	11	1.40628e-199	3.86712e-195	0.541	0.061
itgav	LL0000012936	ENSDARG00000006314	0.63176	11	6.20522e-197	1.70637e-192	0.428	0.038
fgfbp1b	LL0000039806	ENSDARG00000091660	0.616279	11	7.00153e-195	1.92535e-190	0.311	0.02
pnp5a	LL0000022219	ENSDARG00000078619	1.2407	11	5.83943e-193	1.60579e-188	0.837	0.165
anxa2a	LL0000001104	ENSDARG00000003216	0.999275	11	3.75626e-192	1.03293e-187	0.714	0.112
ets2	LL0000009836	ENSDARG00000103980	0.828172	11	1.15513e-188	3.17649e-184	0.682	0.107
sult2st1	LL0000029663	ENSDARG00000033170	0.563867	11	1.32705e-187	3.64924e-183	0.41	0.037
f2rl1.2	LL0000009914	ENSDARG00000077540	0.543593	11	4.46963e-185	1.2291e-180	0.35	0.027
pkp3a	LL0000022041	ENSDARG00000051861	0.519195	11	2.23721e-184	6.15211e-180	0.452	0.047
tagln2	LL0000029936	ENSDARG00000033466	1.06842	11	1.79142e-182	4.92622e-178	0.799	0.148
ucp3	LL0000031555	ENSDARG00000091209	0.615453	11	3.42869e-181	9.42855e-177	0.371	0.032
hhla2a.1	LL0000012092	ENSDARG00000043182	0.548248	11	5.84171e-178	1.60641e-173	0.424	0.042
flna	LL0000010394	ENSDARG00000074201	0.728561	11	6.14521e-176	1.68987e-171	0.675	0.106
krt91	LL0000013467	ENSDARG00000036830	3.34012	11	1.43701e-173	3.95164e-169	0.972	0.445
postnb	LL0000022327	ENSDARG00000104267	1.20674	11	7.80251e-173	2.14561e-168	0.678	0.116
caspb	LL0000004940	ENSDARG00000052039	0.520871	11	4.40822e-171	1.21222e-166	0.403	0.039
pycard	LL0000022969	ENSDARG00000040076	0.754381	11	3.20825e-167	8.82236e-163	0.657	0.104
krt5	LL0000013465	ENSDARG00000058371	2.97403	11	4.9305e-167	1.35584e-162	0.919	0.322
wu:fb18f06	LL0000032127	ENSDARG00000097635	0.567077	11	7.84132e-164	2.15628e-159	0.799	0.159
egfl6	LL0000009448	ENSDARG00000045958	0.610125	11	1.6752e-160	4.60663e-156	0.258	0.017
cfd	LL0000005523	ENSDARG00000039579	0.962124	11	2.36713e-159	6.50937e-155	0.537	0.077
cebpb	LL0000005407	ENSDARG00000042725	1.38109	11	3.875e-159	1.06559e-154	0.954	0.31
ankrd22	LL0000001027	ENSDARG00000002298	0.587184	11	9.52931e-159	2.62046e-154	0.367	0.036
cotl1	LL0000006092	ENSDARG00000026829	1.09738	11	1.06061e-158	2.91658e-154	0.841	0.198
si:rp71-77l1.1	LL0000028358	ENSDARG00000097746	0.758674	11	5.54228e-154	1.52407e-149	0.35	0.033
anxa1a	LL0000001101	ENSDARG00000026726	1.30613	11	1.71879e-152	4.72649e-148	0.837	0.208
fosl2	LL0000010570	ENSDARG00000040623	0.696536	11	3.62294e-152	9.96272e-148	0.551	0.082
krtt1c19e	LL0000013477	ENSDARG00000090268	3.27786	11	6.23764e-152	1.71529e-147	0.813	0.263
pleca	LL0000022096	ENSDARG00000062590	0.943185	11	7.97713e-152	2.19363e-147	0.686	0.135
cd9b	LL0000005264	ENSDARG00000016691	0.666886	11	1.2809e-151	3.52235e-147	0.534	0.075
midn	LL0000019026	ENSDARG00000018524	1.18021	11	1.86523e-150	5.12919e-146	0.852	0.221
XLOC-016198	LL0000034275		0.504388	11	3.03023e-149	8.33284e-145	0.477	0.062
klf3	LL0000013363	ENSDARG00000015495	0.59488	11	5.06889e-148	1.39389e-143	0.572	0.09
si:dkey-248g15.3	LL0000027349	ENSDARG00000097959	2.41093	11	4.14403e-146	1.13957e-141	0.385	0.044
lgals3b	LL0000013618	ENSDARG00000044001	1.15786	11	1.49664e-144	4.11562e-140	0.76	0.192
arhgdig	LL0000001299	ENSDARG00000004034	0.594451	11	2.05546e-144	5.6523e-140	0.64	0.108
cldn7b	LL0000005774	ENSDARG00000014047	0.67848	11	3.73596e-143	1.02735e-138	0.41	0.049
plecb	LL0000022097	ENSDARG00000021987	0.582218	11	1.25349e-138	3.44696e-134	0.534	0.083
tmsb4x	LL0000030691	ENSDARG00000077777	1.55843	11	7.16714e-137	1.97089e-132	1	0.863
jupa	LL0000013049	ENSDARG00000070787	0.597005	11	1.21451e-136	3.33977e-132	0.625	0.113
si:dkey-79d12.5	LL0000027904	ENSDARG00000040284	0.51324	11	1.93777e-134	5.32867e-130	0.396	0.049
zgc:175088	LL0000039073	ENSDARG00000099306	0.923274	11	5.66346e-134	1.5574e-129	0.604	0.116
capns1a	LL0000004890	ENSDARG00000035329	1.09219	11	5.70989e-132	1.57016e-127	0.781	0.225
si:ch73-234b20.5	LL0000026343	ENSDARG00000086996	0.561433	11	6.30297e-132	1.73325e-127	0.505	0.079
vaspb	LL0000031807	ENSDARG00000017105	0.518106	11	7.44705e-131	2.04786e-126	0.502	0.078
zgc:158343	LL0000038791	ENSDARG00000099411	0.904165	11	2.32651e-129	6.39768e-125	0.636	0.125
krt4	LL0000013464	ENSDARG00000017624	1.26606	11	6.59598e-129	1.81383e-124	0.986	0.62
csrp1a	LL0000007461	ENSDARG00000006603	0.518486	11	1.19095e-127	3.275e-123	0.505	0.079
thbs1b	LL0000030260	ENSDARG00000010785	0.59558	11	1.97173e-127	5.42207e-123	0.463	0.068
col1a1b	LL0000005995	ENSDARG00000035809	1.17846	11	2.90113e-125	7.97781e-121	0.806	0.23
ms4a17a.5	LL0000019622	ENSDARG00000097527	0.507698	11	1.9775e-122	5.43794e-118	0.258	0.023
col2a1b	LL0000006006	ENSDARG00000011407	0.776549	11	2.09845e-122	5.77052e-118	0.682	0.146
ptgdsb.1	LL0000022817	ENSDARG00000027088	1.80245	11	5.6077e-122	1.54206e-117	0.88	0.372
foxq1a	LL0000010627	ENSDARG00000030896	0.797213	11	7.15177e-122	1.96667e-117	0.459	0.069
pdlim1	LL0000021543	ENSDARG00000019845	0.567205	11	2.17252e-121	5.97423e-117	0.58	0.106
cyt1	LL0000008630	ENSDARG00000092947	1.314	11	5.8023e-121	1.59558e-116	0.943	0.506
prr13	LL0000022680	ENSDARG00000086216	0.538409	11	1.83571e-118	5.04803e-114	0.519	0.089
slc20a1b	LL0000028552	ENSDARG00000010641	0.72753	11	6.2221e-118	1.71102e-113	0.629	0.132
cyt1l	LL0000008631	ENSDARG00000036832	0.890959	11	1.43463e-115	3.9451e-111	0.781	0.244
nfkbiaa	LL0000020266	ENSDARG00000005481	0.901175	11	5.12412e-110	1.40908e-105	0.661	0.153
tax1bp3	LL0000029988	ENSDARG00000059177	0.536847	11	4.54579e-108	1.25005e-103	0.583	0.12
sparc	LL0000029233	ENSDARG00000019353	1.06229	11	2.63403e-106	7.24332e-102	0.926	0.385
cap1	LL0000004870	ENSDARG00000016350	0.93941	11	3.38272e-103	9.30214e-99	0.802	0.256
col1a2	LL0000005996	ENSDARG00000020007	0.959608	11	1.13576e-102	3.12324e-98	0.802	0.271
fosb	LL0000010567	ENSDARG00000055751	0.956014	11	8.37856e-100	2.30402e-95	0.717	0.194
igfbp1a	LL0000012539	ENSDARG00000099351	1.23248	11	5.81038e-98	1.5978e-93	0.456	0.085
nr4a1	LL0000020590	ENSDARG00000000796	0.854345	11	3.16062e-97	8.69138e-93	0.615	0.151
pmaip1	LL0000022192	ENSDARG00000089307	0.797959	11	3.81606e-96	1.04938e-91	0.583	0.134
col1a1a	LL0000005994	ENSDARG00000012405	0.551605	11	1.60031e-95	4.40069e-91	0.82	0.277
dusp2	LL0000009278	ENSDARG00000098108	0.645549	11	1.7123e-92	4.70866e-88	0.64	0.16
zfand5a	LL0000038410	ENSDARG00000018898	0.754876	11	4.77964e-92	1.31435e-87	0.721	0.213
perp	LL0000021603	ENSDARG00000063572	0.640488	11	5.52298e-90	1.51876e-85	0.608	0.148
slc38a5b	LL0000028740	ENSDARG00000014587	0.778764	11	1.68749e-86	4.64043e-82	0.806	0.287
ywhaz	LL0000038285	ENSDARG00000032575	0.727957	11	5.65115e-83	1.55401e-78	0.809	0.305
XLOC-044191	LL0000038171		0.948412	11	8.85453e-83	2.43491e-78	0.915	0.407
si:dkey-11f4.14	LL0000026687	ENSDARG00000098461	0.877785	11	3.08679e-82	8.48835e-78	0.76	0.25
actb1	LL0000000219	ENSDARG00000037746	1.03515	11	1.28981e-81	3.54684e-77	0.961	0.611
icn	LL0000012457	ENSDARG00000009978	0.751302	11	9.08463e-80	2.49818e-75	0.883	0.376
ppifb	LL0000022379	ENSDARG00000052842	0.695475	11	1.48906e-77	4.09476e-73	0.647	0.209
ahnak	LL0000000495	ENSDARG00000061764	0.636865	11	2.43221e-77	6.68832e-73	0.611	0.167
tdh	LL0000030109	ENSDARG00000002745	0.812634	11	7.92033e-77	2.17801e-72	0.848	0.373
jund	LL0000013047	ENSDARG00000067850	0.58408	11	9.41779e-75	2.5898e-70	0.633	0.174
rbp4	LL0000023321	ENSDARG00000101199	1.36197	11	1.10901e-74	3.04968e-70	0.894	0.509
actb2	LL0000000220	ENSDARG00000037870	0.734835	11	8.14383e-74	2.23947e-69	1	0.907
zgc:162730	LL0000038847	ENSDARG00000103720	0.716463	11	2.67283e-72	7.35001e-68	0.965	0.512
btg2	LL0000002063	ENSDARG00000020298	0.759211	11	6.15706e-70	1.69313e-65	0.972	0.531
eef1a1l1	LL0000009394	ENSDARG00000020850	0.506604	11	2.38883e-69	6.56904e-65	1	0.966
pinx1	LL0000021976	ENSDARG00000023532	0.671866	11	6.07274e-69	1.66994e-64	0.731	0.275
col12a1b	LL0000005982	ENSDARG00000019601	0.530782	11	1.99005e-67	5.47245e-63	0.36	0.072
exosc1	LL0000009879	ENSDARG00000059841	0.639214	11	2.9703e-67	8.16802e-63	0.597	0.195
klf2a	LL0000013361	ENSDARG00000042667	0.521972	11	3.60597e-67	9.91605e-63	0.47	0.114
nop10	LL0000020469	ENSDARG00000104227	0.7458	11	1.66055e-66	4.56635e-62	0.83	0.402
bzw1b	LL0000003870	ENSDARG00000099148	0.619735	11	4.58766e-64	1.26156e-59	0.657	0.221
ier2b	LL0000012475	ENSDARG00000086881	0.667297	11	2.77038e-61	7.61826e-57	0.915	0.411
ddit3	LL0000008759	ENSDARG00000059836	0.670522	11	6.03485e-59	1.65952e-54	0.65	0.22
prelid3b	LL0000022542	ENSDARG00000009505	0.657076	11	3.88818e-58	1.06921e-53	0.816	0.369
arpc2	LL0000001398	ENSDARG00000075989	0.521336	11	1.01404e-51	2.7885e-47	0.742	0.315
chac1	LL0000005551	ENSDARG00000070426	0.645697	11	2.40092e-51	6.6023e-47	0.947	0.562
egr1	LL0000009456	ENSDARG00000037421	0.578139	11	3.68231e-51	1.0126e-46	0.746	0.293
eef1da	LL0000009400	ENSDARG00000102291	0.584447	11	4.2267e-51	1.1623e-46	0.958	0.684
cebpd	LL0000005408	ENSDARG00000087303	0.532444	11	6.84154e-51	1.88135e-46	0.965	0.572
dusp1	LL0000009269	ENSDARG00000100515	0.52848	11	3.58728e-49	9.86467e-45	0.654	0.241
myl12.1	LL0000019842	ENSDARG00000099766	0.659936	11	3.02949e-47	8.33079e-43	0.859	0.547
ddx21	LL0000008775	ENSDARG00000063626	0.573299	11	1.20228e-45	3.30614e-41	0.809	0.421
ccng2	LL0000005175	ENSDARG00000017602	0.500526	11	2.98274e-45	8.20224e-41	0.633	0.245
junba	LL0000013045	ENSDARG00000074378	0.579039	11	1.54324e-44	4.24376e-40	0.94	0.512
atf3	LL0000001523	ENSDARG00000007823	0.516745	11	3.14814e-42	8.65708e-38	0.389	0.114
ddx5	LL0000008793	ENSDARG00000038068	0.587582	11	2.33588e-40	6.42343e-36	0.905	0.506
cldnb	LL0000005777	ENSDARG00000009544	0.688706	11	2.2669e-39	6.23375e-35	0.385	0.117
krt97	LL0000013473	ENSDARG00000000212	0.979569	11	1.07384e-38	2.95295e-34	0.332	0.098
sdc4	LL0000024337	ENSDARG00000059906	0.501275	11	5.55792e-37	1.52837e-32	0.89	0.46
krt15	LL0000013458	ENSDARG00000036840	1.53095	11	1.12562e-27	3.09533e-23	0.343	0.123
cx43	LL0000008472	ENSDARG00000041799	3.88732	12	0	0	0.885	0.069
slc1a2b	LL0000028540	ENSDARG00000102453	3.70095	12	0	0	0.867	0.057
atp1a1b	LL0000001580	ENSDARG00000019856	3.34695	12	0	0	0.932	0.075
mfge8a	LL0000018927	ENSDARG00000015349	3.13153	12	0	0	0.669	0.036
zgc:165461	LL0000038884	ENSDARG00000040162	3.09717	12	0	0	0.698	0.035
atp1b4	LL0000001590	ENSDARG00000053262	2.96076	12	0	0	0.896	0.044
slc6a1b	LL0000028839	ENSDARG00000039647	2.63998	12	0	0	0.59	0.036
ptn	LL0000022861	ENSDARG00000102340	2.63936	12	0	0	0.723	0.039
s1pr1	LL0000024155	ENSDARG00000042690	2.41578	12	0	0	0.727	0.081
XLOC-003690	LL0000032644		2.32245	12	0	0	0.658	0.054
si:ch211-66e2.5	LL0000026107	ENSDARG00000091579	2.30842	12	0	0	0.651	0.011
slc1a3b	LL0000028542	ENSDARG00000043148	2.22607	12	0	0	0.604	0.017
cspg5b	LL0000007454	ENSDARG00000099793	2.18964	12	0	0	0.594	0.036
cldn7a	LL0000005773	ENSDARG00000036376	2.08188	12	0	0	0.428	0.02
slc4a4a	LL0000028803	ENSDARG00000013730	1.98697	12	0	0	0.597	0.024
hepacama	LL0000012039	ENSDARG00000056934	1.85033	12	0	0	0.594	0.011
gpm6bb	LL0000011574	ENSDARG00000001676	1.8386	12	0	0	0.655	0.063
ca4a	LL0000003948	ENSDARG00000043589	1.72048	12	0	0	0.414	0.012
gpr37l1b	LL0000011636	ENSDARG00000056774	1.64639	12	0	0	0.442	0.007
hspb15	LL0000012386	ENSDARG00000078411	1.54473	12	0	0	0.349	0.004
ptprz1b	LL0000022918	ENSDARG00000020871	1.50092	12	0	0	0.446	0.023
robo4	LL0000023850	ENSDARG00000009387	1.33262	12	0	0	0.284	0.008
sulf2a	LL0000029653	ENSDARG00000018423	1.31402	12	0	0	0.255	0.006
si:ch1073-303k11.2	LL0000024819	ENSDARG00000088247	1.28544	12	0	0	0.417	0.017
slc7a10b	LL0000028856	ENSDARG00000051730	1.23427	12	0	0	0.302	0.001
zgc:172122	LL0000038974	ENSDARG00000079191	1.20486	12	1.74737e-306	4.80511e-302	0.335	0.013
her4.4	LL0000012052	ENSDARG00000009822	2.12622	12	1.13789e-284	3.1291e-280	0.597	0.057
crtac1a	LL0000007340	ENSDARG00000059826	1.63619	12	1.25469e-245	3.45028e-241	0.446	0.036
her4.2	LL0000012050	ENSDARG00000094426	2.16515	12	5.90284e-242	1.62322e-237	0.658	0.084
mlc1	LL0000019363	ENSDARG00000063026	1.01333	12	1.99389e-232	5.48301e-228	0.277	0.012
ptgdsb.2	LL0000022818	ENSDARG00000071626	3.192	12	1.3765e-214	3.78525e-210	0.946	0.278
fjx1	LL0000010367	ENSDARG00000035873	1.1237	12	6.70385e-214	1.84349e-209	0.288	0.015
chl1b	LL0000005600	ENSDARG00000103109	1.27133	12	7.09644e-213	1.95145e-208	0.338	0.022
mdkb	LL0000018806	ENSDARG00000020708	2.80476	12	2.42717e-209	6.67449e-205	0.96	0.299
efhd1	LL0000009426	ENSDARG00000043446	1.63141	12	2.74874e-208	7.55875e-204	0.522	0.058
fabp7a	LL0000009941	ENSDARG00000007697	3.11813	12	3.28677e-207	9.03829e-203	0.968	0.34
abi3a	LL0000000105	ENSDARG00000060072	0.835245	12	4.21497e-202	1.15907e-197	0.252	0.012
CU467822.1	LL0000007981	ENSDARG00000101584	1.53333	12	1.38372e-197	3.8051e-193	0.568	0.074
slc38a3a	LL0000028736	ENSDARG00000027065	1.31362	12	1.58465e-195	4.35762e-191	0.424	0.039
slc3a2a	LL0000028760	ENSDARG00000036427	1.65249	12	3.41207e-190	9.38285e-186	0.5	0.059
endouc	LL0000009643	ENSDARG00000112234	2.29583	12	3.45105e-184	9.49005e-180	0.45	0.05
her4.1	LL0000012049	ENSDARG00000056732	2.04493	12	9.67873e-184	2.66155e-179	0.493	0.059
ppap2d	LL0000022348	ENSDARG00000069940	1.73623	12	4.13335e-172	1.13663e-167	0.612	0.107
XLOC-027924	LL0000035734		1.14315	12	1.09802e-171	3.01944e-167	0.335	0.027
syt11a	LL0000029776	ENSDARG00000057913	1.28197	12	7.78663e-166	2.14124e-161	0.514	0.069
ndrg3a	LL0000020101	ENSDARG00000013087	1.99683	12	9.73424e-162	2.67682e-157	0.665	0.135
glula	LL0000011411	ENSDARG00000099776	2.68578	12	3.79743e-157	1.04426e-152	0.946	0.436
ptgdsb.1	LL0000022817	ENSDARG00000027088	2.927	12	2.00921e-156	5.52513e-152	0.906	0.372
aqp1a.1	LL0000001212	ENSDARG00000023713	1.69983	12	1.9301e-153	5.30758e-149	0.475	0.065
cyp4t8	LL0000008614	ENSDARG00000004964	1.16403	12	1.02117e-150	2.80811e-146	0.367	0.039
her15.1	LL0000012046	ENSDARG00000054562	1.33917	12	3.82702e-145	1.05239e-140	0.608	0.109
CR848047.1	LL0000007048	ENSDARG00000095906	0.997201	12	3.33772e-141	9.1784e-137	0.342	0.035
mt2	LL0000019674	ENSDARG00000041623	2.11824	12	6.32559e-140	1.73947e-135	0.831	0.278
si:ch211-212k18.5	LL0000025548	ENSDARG00000103316	0.896031	12	8.09754e-137	2.22674e-132	0.299	0.028
IGLON5	LL0000012613	ENSDARG00000022176	0.905797	12	2.82121e-136	7.75805e-132	0.309	0.029
spock2	LL0000029300	ENSDARG00000075393	1.31593	12	5.34182e-135	1.46895e-130	0.324	0.033
qki2	LL0000022989	ENSDARG00000010018	0.962572	12	6.08353e-130	1.67291e-125	0.45	0.067
ttyh3b	LL0000031344	ENSDARG00000007678	1.19457	12	1.14605e-122	3.15152e-118	0.327	0.037
sox3	LL0000029194	ENSDARG00000053569	1.0458	12	3.96098e-119	1.08923e-114	0.414	0.061
si:dkey-85k7.7	LL0000027983	ENSDARG00000101135	1.95852	12	1.42722e-117	3.92471e-113	0.583	0.136
cd63	LL0000005248	ENSDARG00000025147	1.75376	12	2.36924e-114	6.51518e-110	0.899	0.431
slc6a9	LL0000028852	ENSDARG00000018534	1.31565	12	2.72715e-106	7.4994e-102	0.335	0.046
acbd7	LL0000000151	ENSDARG00000094730	1.26338	12	8.83005e-103	2.42818e-98	0.435	0.078
msi1	LL0000019639	ENSDARG00000010710	0.976345	12	3.60198e-99	9.90507e-95	0.457	0.088
sox2	LL0000029190	ENSDARG00000070913	0.762489	12	5.16459e-99	1.42021e-94	0.266	0.03
eno1b	LL0000009648	ENSDARG00000013750	1.03324	12	8.85903e-98	2.43614e-93	0.342	0.05
proza	LL0000022653	ENSDARG00000037783	1.29799	12	8.21806e-97	2.25989e-92	0.583	0.157
smox	LL0000029001	ENSDARG00000036967	1.59954	12	4.40895e-96	1.21242e-91	0.496	0.115
tmem47	LL0000030623	ENSDARG00000057322	0.951573	12	1.51243e-95	4.15903e-91	0.342	0.053
notch3	LL0000020486	ENSDARG00000052139	1.00307	12	7.98825e-95	2.19669e-90	0.371	0.062
CABZ01080702.1	LL0000004522	ENSDARG00000100562	1.25862	12	1.41012e-93	3.87769e-89	0.55	0.141
nell2a	LL0000020199	ENSDARG00000090690	0.851093	12	1.0855e-91	2.98501e-87	0.266	0.032
cd81a	LL0000005254	ENSDARG00000036080	1.32381	12	1.30261e-91	3.58205e-87	0.903	0.509
si:dkey-205h13.1	LL0000027068	ENSDARG00000079307	1.11998	12	4.97352e-89	1.36767e-84	0.284	0.038
aldocb	LL0000000886	ENSDARG00000019702	1.16639	12	1.28698e-87	3.53906e-83	0.712	0.238
mdka	LL0000018805	ENSDARG00000036036	2.2809	12	1.79298e-87	4.93052e-83	0.745	0.335
pygmb	LL0000022976	ENSDARG00000013317	0.790291	12	7.32297e-86	2.01374e-81	0.281	0.038
cadm4	LL0000004791	ENSDARG00000040291	1.09638	12	1.36625e-84	3.75705e-80	0.32	0.051
id1	LL0000012459	ENSDARG00000040764	1.56101	12	2.23073e-84	6.1343e-80	0.817	0.395
bsg	LL0000002034	ENSDARG00000019881	1.20388	12	1.20363e-83	3.30985e-79	0.899	0.585
cldn12	LL0000005759	ENSDARG00000003927	0.932127	12	1.20422e-83	3.31149e-79	0.331	0.056
mgll	LL0000018968	ENSDARG00000036820	0.933592	12	1.70448e-83	4.68716e-79	0.295	0.045
spred1	LL0000029316	ENSDARG00000041449	0.855572	12	1.3168e-80	3.62107e-76	0.32	0.054
cadm2a	LL0000004788	ENSDARG00000009930	0.778732	12	2.68194e-79	7.37506e-75	0.302	0.047
gpm6aa	LL0000011571	ENSDARG00000055455	0.819841	12	4.78216e-78	1.31505e-73	0.755	0.254
hs2st1b	LL0000012322	ENSDARG00000062008	0.946619	12	7.10111e-77	1.95273e-72	0.342	0.064
sox19a	LL0000029186	ENSDARG00000010770	0.832079	12	1.27308e-75	3.50085e-71	0.255	0.036
BX664610.1	LL0000003434	ENSDARG00000095557	0.779786	12	2.71712e-75	7.47181e-71	0.252	0.035
pdxka	LL0000021563	ENSDARG00000088959	0.75142	12	7.44968e-75	2.04859e-70	0.284	0.046
itm2ba	LL0000012962	ENSDARG00000007098	1.17037	12	2.59316e-74	7.13093e-70	0.759	0.359
anxa13	LL0000001099	ENSDARG00000013976	0.975626	12	3.34713e-71	9.20427e-67	0.478	0.13
wls	LL0000032077	ENSDARG00000009534	1.17879	12	3.23253e-70	8.88913e-66	0.514	0.158
gnai2a	LL0000011443	ENSDARG00000018174	1.04203	12	1.49205e-68	4.10299e-64	0.511	0.156
timp4.3	LL0000030335	ENSDARG00000100795	1.32947	12	3.33776e-67	9.1785e-63	0.406	0.098
rgma	LL0000023592	ENSDARG00000012248	0.816157	12	4.71445e-65	1.29643e-60	0.266	0.045
si:ch211-251b21.1	LL0000025837	ENSDARG00000007275	1.93509	12	4.96668e-65	1.36579e-60	0.773	0.393
cspg5a	LL0000007453	ENSDARG00000069981	0.74326	12	1.65597e-64	4.55375e-60	0.356	0.075
bckdhbl	LL0000001834	ENSDARG00000093569	0.862339	12	2.47732e-64	6.81239e-60	0.324	0.067
zgc:153704	LL0000038744	ENSDARG00000045979	1.48745	12	4.41451e-64	1.21395e-59	0.529	0.165
fgfr2	LL0000010319	ENSDARG00000058115	0.993559	12	1.24804e-61	3.43197e-57	0.302	0.061
cntfr	LL0000005937	ENSDARG00000028661	1.13438	12	6.12508e-61	1.68433e-56	0.363	0.087
CR383676.1	LL0000006421	ENSDARG00000099970	0.77598	12	1.6375e-60	4.50297e-56	1	0.999
cd82a	LL0000005256	ENSDARG00000019098	0.989214	12	4.04096e-58	1.11122e-53	0.432	0.125
tegt	LL0000030142	ENSDARG00000077934	1.1264	12	5.01225e-56	1.37832e-51	0.777	0.479
spry2	LL0000029324	ENSDARG00000078308	1.05103	12	2.42362e-53	6.66471e-49	0.478	0.164
tspan7b	LL0000031261	ENSDARG00000008407	0.732627	12	5.24512e-52	1.44236e-47	0.367	0.091
abat	LL0000000025	ENSDARG00000006031	0.937288	12	1.24931e-50	3.43547e-46	0.396	0.118
si:dkey-9i23.16	LL0000028065	ENSDARG00000093954	0.971153	12	4.28275e-50	1.17771e-45	0.428	0.138
cyp26b1	LL0000008556	ENSDARG00000077121	1.69733	12	1.08249e-49	2.97673e-45	0.327	0.084
cebpd	LL0000005408	ENSDARG00000087303	0.883287	12	4.26922e-48	1.17399e-43	0.863	0.575
ptprfb	LL0000022900	ENSDARG00000005754	0.796502	12	1.58571e-47	4.36055e-43	0.259	0.057
glulb	LL0000011412	ENSDARG00000100003	1.00456	12	4.56923e-47	1.25649e-42	0.723	0.46
her9	LL0000012058	ENSDARG00000056438	0.998579	12	5.11217e-47	1.4058e-42	0.363	0.104
CU634008.1	LL0000008125	ENSDARG00000100430	0.551491	12	4.91355e-45	1.35118e-40	0.27	0.059
phgdh	LL0000021713	ENSDARG00000001873	0.767725	12	7.59583e-44	2.08878e-39	0.266	0.063
agmo	LL0000000464	ENSDARG00000025595	0.813542	12	1.87078e-43	5.14445e-39	0.277	0.068
si:dkey-56m19.5	LL0000027754	ENSDARG00000068432	0.8891	12	3.37294e-42	9.27525e-38	0.46	0.167
cyp2ad6	LL0000008575	ENSDARG00000042956	0.883016	12	3.76334e-42	1.03488e-37	0.381	0.124
cdo1	LL0000005391	ENSDARG00000099389	1.00543	12	5.23987e-41	1.44091e-36	0.424	0.156
cox4i2	LL0000006105	ENSDARG00000022509	0.886588	12	6.50751e-41	1.7895e-36	0.403	0.136
psap	LL0000022721	ENSDARG00000013968	1.13011	12	8.25433e-39	2.26986e-34	0.558	0.279
gas1b	LL0000011148	ENSDARG00000067984	0.754245	12	1.33826e-38	3.68008e-34	0.255	0.064
gapdhs	LL0000011139	ENSDARG00000039914	0.588962	12	2.02403e-38	5.56588e-34	0.813	0.571
npc2	LL0000020512	ENSDARG00000090912	0.932451	12	6.29069e-38	1.72988e-33	0.622	0.341
mob1bb	LL0000019435	ENSDARG00000012953	0.684768	12	1.19304e-37	3.28074e-33	0.273	0.074
lfng	LL0000013610	ENSDARG00000037879	0.842855	12	1.39752e-37	3.84305e-33	0.363	0.118
sdcbp2	LL0000024339	ENSDARG00000012513	0.854661	12	4.21033e-37	1.1578e-32	0.601	0.329
gnao1a	LL0000011449	ENSDARG00000016676	0.568279	12	4.42752e-37	1.21752e-32	0.306	0.085
ecm1b	LL0000009362	ENSDARG00000105239	0.83037	12	3.39413e-36	9.33351e-32	0.327	0.104
cxcl14	LL0000008488	ENSDARG00000056627	0.999834	12	6.33628e-36	1.74241e-31	0.263	0.069
lpin1	LL0000018298	ENSDARG00000020239	1.00932	12	2.49744e-35	6.86772e-31	0.647	0.373
cyp2p7	LL0000008591	ENSDARG00000042980	0.842401	12	2.50248e-35	6.88156e-31	0.273	0.077
si:ch211-286b5.5	LL0000026022	ENSDARG00000096661	0.875899	12	3.09279e-35	8.50485e-31	0.475	0.22
sesn1	LL0000024523	ENSDARG00000020693	0.948335	12	4.13612e-34	1.13739e-29	0.676	0.448
cxcl12a	LL0000008486	ENSDARG00000037116	0.569368	12	7.46698e-34	2.05335e-29	0.403	0.142
ctsf	LL0000007759	ENSDARG00000063095	0.879541	12	1.27428e-33	3.50415e-29	0.547	0.268
[truncated: 10,332 more rows]
