# Supplementary material for: An improved zebrafish transcriptome annotation for sensitive and comprehensive detection of cell type-specific genes
Source: eLife. 2020 Aug 24;9:e55792. doi: 10.7554/eLife.55792 (PMC7486121; doi:10.7554/eLife.55792)
Supplement: Figure 5—source data 1. — Worksheet one includes all cartilage genes identified using both Ens95 and V4.2 quantification, as indicated, with associated adjusted p-values and log2 fold change (comparison of cartilage cells to all other clusters). 3' UTR length from matching reference gene (from Figure 2—source data 2) is indicated. Worksheet two includes matched bulk RNA-seq quantification from Ens95 and V4.3 annotations for cartilage-specific genes. Data used to generate Figure 5A–C, Figure 5—figure supplement 1A,B. [file elife-55792-fig5-data1.xlsx]

## Sheet: title
	Figure 5 - source data 1
	Cartilage-specific genes identified by scRNA-seq
	worksheet 1 - cartilage-specific genes identified by indicated annotation, includes log2 fold change and 3' UTR length for matched reference gene
	worksheet 2 - matching pdgfrbpos bulk RNA-seq data for cartilage-specific genes

## Sheet: 1 cartilage genes with ref
gene	Ens95orV4	Ensdarg	LLgeneID	avg_logFC Ens95	p_val_adj Ens95	avg_logFC	p_val_adj	Ens95 3pUTR length	V4.2 3pUTR length	Note
acana	both	ENSDARG00000035891	LL0000000138	1.619	0	2.18943	0	1207	1586
actn4	V4only	ENSDARG00000099786	LL0000000231			0.572971	1.86494e-17	1149	1996
adgrg6	both	ENSDARG00000054137	LL0000000363	0.690475	2.83037e-93	0.926873	1.39284e-130
adh5	both	ENSDARG00000080010	LL0000000374	0.691828	5.40298e-28	0.724559	6.56354e-30	166	166
ak2	V4only	ENSDARG00000005926	LL0000000523			0.513811	9.41807e-11
aldob	both	ENSDARG00000053684	LL0000000884	1.70708	8.87891e-99	1.7315	2.26807e-101
anxa1a	both	ENSDARG00000026726	LL0000001101	0.727845	4.9203e-45	0.972556	1.07094e-68
appb	both	ENSDARG00000055543	LL0000001202	0.888369	1.94841e-74	0.82907	8.68327e-73	1882	1882
arrdc3a	Ens95only	ENSDARG00000052690	LL0000001418	0.500993	4.06101e-16	0.323755	1.57085e-06	2157	2267	under log2FC cutoff in V4.2
atp10a	V4only	ENSDARG00000061039	LL0000001566			0.699351	5.57425e-138	781	781
atp1b1a	V4only	ENSDARG00000013144	LL0000001584			0.540796	4.81386e-27	1199	1199
bhmt	both	ENSDARG00000013430	LL0000001893	0.635966	2.55374e-35	0.577998	3.02604e-37	224	224
bicdl2	both	ENSDARG00000052427	LL0000001901	1.00175	2.28588e-174	1.03811	6.93868e-242	185	499
btg2	both	ENSDARG00000020298	LL0000002063	0.723559	3.41727e-27	0.800141	1.70923e-30	2389	2389
bzw1b	both	ENSDARG00000099148	LL0000003870	0.960776	7.8806e-14	0.961801	1.08636e-13	274	274
capgb	V4only	ENSDARG00000099672	LL0000004873			0.529427	3.24373e-27	4065	4065
carhsp1	both	ENSDARG00000053129	LL0000004907	0.86962	8.54657e-31	0.906774	7.69756e-39	909	924
cav2	both	ENSDARG00000052000	LL0000004954	1.83519	1.26667e-217	1.96206	0	1133	1133
cbx7a	both	ENSDARG00000038025	LL0000005004	0.816079	8.24909e-32	0.871694	8.86491e-38	710	710
ccni	both	ENSDARG00000068214	LL0000005177	0.547609	4.419e-19	0.627995	2.16287e-27	967	969
cd63	both	ENSDARG00000025147	LL0000005248	0.606665	1.11374e-36	0.637691	3.85408e-39	378	451
cd99	V4only	ENSDARG00000051975	LL0000005261			0.580446	7.53222e-17	3294	3294
cebpd	both	ENSDARG00000087303	LL0000005408	0.695128	5.27469e-23	0.76121	1.61906e-25
chac1	both	ENSDARG00000070426	LL0000005551	0.945817	1.64178e-47	1.01212	2.95575e-50	457	457
chad	both	ENSDARG00000045071	LL0000005553	1.62995	0	1.61111	0	1435	1435
clic2	both	ENSDARG00000010625	LL0000005798	2.02586	2.40039e-230	2.06893	1.92174e-297	516	541
clic4	both	ENSDARG00000022995	LL0000005800	0.538488	2.59907e-19	0.543912	2.08556e-18	1915	1915
clu	both	ENSDARG00000010434	LL0000005842	0.950372	9.16392e-21	0.974577	7.76514e-26	406	406
cnmd	both	ENSDARG00000100133	LL0000005897	2.55281	0	2.43486	0	706	706
col11a1a	both	ENSDARG00000026165	LL0000005978	1.65659	5.15495e-173	1.39028	6.41597e-181	1152	1154
col11a2	both	ENSDARG00000012422	LL0000005980	1.41362	5.17588e-255	1.12226	2.3263e-232	1599	2112
col2a1a	both	ENSDARG00000069093	LL0000006005	2.1164	0	1.87741	0	1308	1327
col2a1b	both	ENSDARG00000011407	LL0000006006	1.00085	2.16892e-56	0.776126	1.50211e-50	1123	1123
col8a2	V4only	ENSDARG00000060893	LL0000006028			2.20256	0	578	3163
col9a1a	both	ENSDARG00000073699	LL0000006029	2.32946	0	2.11694	0	600	600
col9a2	both	ENSDARG00000024492	LL0000006031	2.00538	0	1.78808	0	879	989
col9a3	both	ENSDARG00000037845	LL0000006032	2.22838	0	1.95111	0	1041	1041
cpeb4b	both	ENSDARG00000100499	LL0000006140	0.642321	5.90132e-34	0.599582	1.97156e-32	3479	3479
cpn1	V4only	ENSDARG00000096728	LL0000006151			1.25426	3.94129e-153	222	387
cpn1.1	Ens95only	ENSDARG00000005185		1.30424	1.06558e-160					two separate adjacent genes in Ens95 collapsed into single locus in V4.2; single V4.2 locus is in this cluster
cspg4	V4only	ENSDARG00000078227	LL0000007452			0.651615	1.26085e-89	47	4725
csrnp1a	both	ENSDARG00000031426	LL0000007457	0.74992	5.43443e-43	0.78073	1.37894e-56	1397	1397
ctgfa	both	ENSDARG00000042934	LL0000007729	2.56901	9.25943e-242	2.62407	3.90666e-269	895	895
cthrc1a	both	ENSDARG00000087198	LL0000007734	1.43945	7.26021e-214	1.29266	2.21531e-193	494	494
CU929237.1	V4only	ENSDARG00000081800	LL0000008373			0.512859	1.20095e-23	missing
cyp1b1	both	ENSDARG00000068934	LL0000008548	1.01133	0	1.02319	0	1490	1490
cyp26b1	both	ENSDARG00000077121	LL0000008556	0.563002	5.18946e-49	0.632725	4.71663e-56	1580	1580
cyr61	V4only	ENSDARG00000023062	LL0000008623			0.542391	5.52904e-17	3885	3885
CYTL1	V4only	ENSDARG00000110744	LL0000008640			1.84196	0	missing
dars	V4only	ENSDARG00000070043	LL0000008679			0.55066	7.49684e-18	missing
ecrg4a	both	ENSDARG00000056087	LL0000009365	1.31113	8.82266e-150	1.35762	3.5122e-173	467	467
eef1da	both	ENSDARG00000102291	LL0000009400	0.991409	3.86271e-73	1.09617	3.13288e-79
ehd2b	V4only	ENSDARG00000040362	LL0000009467			0.839621	3.52399e-34	842	842
eif3g	V4only	ENSDARG00000016889	LL0000009502			0.553717	5.26178e-19	89	89
eif4ebp2	V4only	ENSDARG00000031819	LL0000009527			0.521362	1.08326e-16	2313	2313
eif4ebp3	both	ENSDARG00000054916	LL0000009528	1.21889	1.94674e-58	1.21206	4.58603e-57
eif4ebp3l	V4only	ENSDARG00000041607	LL0000009529			0.508669	5.84148e-15
emilin3a	V4only	ENSDARG00000078052	LL0000009617			2.29455	0	missing
eps8l2	V4only	ENSDARG00000058108	LL0000009742			1.12858	0	495	2722
eps8l2	Ens95only	ENSDARG00000058108	LL0000015708	0.634194	4.90302e-220					overlapping transcript in Ens95 fuses two adjacent genes
epyc	both	ENSDARG00000056950	LL0000009747	1.46945	8.81277e-281	1.0233	4.97874e-245	3539	3539
f13a1b	both	ENSDARG00000036893	LL0000009909	2.26367	0	2.5733	0	3028	3028
fam129ba	both	ENSDARG00000062970	LL0000009981	0.743899	1.32352e-106	0.773595	7.37921e-137	1692	1692
fam169ab	V4only	ENSDARG00000004177	LL0000010017			0.679841	4.54623e-39	missing
fam49a	both	ENSDARG00000006672	LL0000010084	0.549784	4.62665e-19	0.564586	4.00828e-24	622	622
fbp1a	both	ENSDARG00000021366	LL0000010173	0.572732	3.97652e-19	0.594623	2.95154e-22	416	416
fgfbp2b	both	ENSDARG00000038056	LL0000010313	3.99823	0	4.04209	0	399	399
fgfrl1b	both	ENSDARG00000052556	LL0000010323	0.637961	1.17275e-72	0.673973	1.59542e-85	1911	1912
fn1b	both	ENSDARG00000006526	LL0000010426	1.49873	1.40563e-116	1.58998	1.3259e-143
foxa3	both	ENSDARG00000012788	LL0000010574	0.85376	1.23141e-259	0.799638	8.87043e-217	1111	1111
foxc1b	both	ENSDARG00000055398	LL0000010579	0.549969	5.22278e-36	0.553597	1.76935e-39
fsta	both	ENSDARG00000052846	LL0000010893	1.2062	5.89236e-87	1.24675	1.40245e-130	2485	2485
fzd8a	both	ENSDARG00000045444	LL0000011029	0.573652	9.29552e-51	0.612427	1.37489e-73	550	550
fzd9b	V4only	ENSDARG00000014673	LL0000011032			0.634539	2.08475e-98
gadd45ba	both	ENSDARG00000027744	LL0000011088	0.81683	1.31935e-17	0.840543	1.43326e-21	660	660
gcnt4a	both	ENSDARG00000035198	LL0000011221	1.27553	2.67104e-162	1.28244	6.67363e-215	372	372
gdf10a	V4only	ENSDARG00000095378	LL0000011231			0.934624	1.8517e-96	481	1701
gnai2a	both	ENSDARG00000018174	LL0000011443	0.510553	2.94493e-16	0.520792	1.55453e-18	998	998
gtpbp4	V4only	ENSDARG00000018961	LL0000011855			0.502715	8.07106e-20
gyg1a	both	ENSDARG00000011934	LL0000011884	2.27018	2.00728e-192	2.20224	3.90203e-186	1519	1519
gyg1b	both	ENSDARG00000059391	LL0000011885	2.48434	7.47635e-285	2.52467	0	718	777
hand2	both	ENSDARG00000008305	LL0000011925	1.11194	1.04921e-108	1.16571	6.69027e-142	533	533
hbegfa	V4only	ENSDARG00000075121	LL0000011959			0.605701	2.73772e-16	939	939
hist2h2l	both	ENSDARG00000068996	LL0000012137	1.17216	4.6136e-45	1.12674	1.48158e-42	403	403
hoxa13b	both	ENSDARG00000036254	LL0000012244	0.967484	1.02743e-176	0.975189	2.66819e-245	627	627
hsp90ab1	both	ENSDARG00000029150	LL0000012371	0.521387	2.08496e-39	0.589071	1.61629e-44	2383	2383
hvcn1	both	ENSDARG00000040338	LL0000012434	0.55466	1.31819e-21	0.547508	1.65199e-24	447	652
id1	both	ENSDARG00000040764	LL0000012459	0.807864	1.14093e-09	0.859488	4.24398e-12	501	501
id3	V4only	ENSDARG00000054823	LL0000012462			0.595451	8.90292e-19	690	690
ier2a	V4only	ENSDARG00000099195	LL0000012474			0.538677	2.37292e-09	541	541
ier2b	both	ENSDARG00000086881	LL0000012475	1.01589	3.7699e-53	1.09454	1.29623e-59	523	523
itga9	both	ENSDARG00000032435	LL0000012932	0.76803	1.05817e-122	0.991353	1.4732e-162
itih1	both	ENSDARG00000055053	LL0000012951	1.22442	0	1.1904	0	197	197
junbb	both	ENSDARG00000104773	LL0000013046	0.756601	2.55252e-22	0.851454	5.18697e-30	186	186
klf15	V4only	ENSDARG00000091127	LL0000013359			0.792518	1.25536e-35	744	3781
klf2b	both	ENSDARG00000040432	LL0000013362	1.48293	1.23077e-204	1.49812	6.96266e-223	4684	4684
krt18a.1	both	ENSDARG00000018404	LL0000013460	2.25642	9.8229e-121	2.38933	1.04514e-150	368	368
krt8	both	ENSDARG00000058358	LL0000013466	1.96777	1.87399e-97	2.11962	3.08086e-122
lasp1	both	ENSDARG00000057867	LL0000013546	0.515951	1.70921e-20	0.553445	5.65182e-23	1251	1251
lgals3b	both	ENSDARG00000044001	LL0000013618	0.552099	2.00995e-17	0.62313	5.1594e-23	921	921
LOC100330861	V4only		LL0000014092			0.89908	8.06366e-154
LOC566587	V4only		LL0000018161			0.867771	9.63892e-32
loxl1	both	ENSDARG00000054451	LL0000018276	1.33036	9.36272e-218	1.36522	3.30171e-281	4460	4665
loxl2a	V4only	ENSDARG00000044010	LL0000018277			1.1267	5.80206e-114	missing
loxl3b	both	ENSDARG00000039563	LL0000018280	0.705113	6.84133e-97	0.740135	3.15395e-91	755	755
loxl4	both	ENSDARG00000025089	LL0000018281	0.93174	0	0.938211	0	3623	3623
lpar1	V4only	ENSDARG00000099840	LL0000018284			0.692292	8.96033e-54	367	4173
map1lc3b	V4only	ENSDARG00000101127	LL0000018579			0.520976	1.89136e-19	1244	1244
marveld1	both	ENSDARG00000011724	LL0000018688	0.687073	8.69521e-75	1.15386	9.27006e-189	638	638
matn1	both	ENSDARG00000030215	LL0000018706	3.79708	0	3.45544	0	526	528
mcl1a	both	ENSDARG00000009779	LL0000018766	0.76187	1.45872e-27	0.857148	8.3235e-34	463	1278
mcl1b	both	ENSDARG00000008363	LL0000018767	0.649087	3.40742e-15	0.721843	8.11309e-25	858	858
meltf	V4only	ENSDARG00000075159	LL0000018868			0.900317	0	454	1757
mia	both	ENSDARG00000052437	LL0000019001	3.76195	0	3.83427	0	22	627
mmp2	both	ENSDARG00000017676	LL0000019407	1.39623	2.62764e-140	1.41978	6.38078e-153	847	847
mob2b	both	ENSDARG00000012005	LL0000019437	0.959597	8.9573e-117	0.958161	7.7819e-110	2802	2893
msi2b	Ens95only	ENSDARG00000032614	LL0000019641	0.51904	2.04203e-24	0.42779	2.72152e-16	1646	4814	just under log2FC cutoff in V4.2
msna	both	ENSDARG00000058128	LL0000019649	0.504895	1.75929e-07	0.635993	1.96424e-16	1669	1812
mych	V4only	ENSDARG00000077473	LL0000019810			0.507086	1.70315e-08	685	685
ninj2	both	ENSDARG00000079824	LL0000020313	1.19914	0	1.18721	0	382	382
nop53	V4only	ENSDARG00000100452	LL0000020473			0.507448	7.70493e-13	163	163
nsa2	both	ENSDARG00000007708	LL0000020644	0.666006	1.96157e-38	0.788851	9.94556e-46	207	207
p3h2	both	ENSDARG00000103026	LL0000021184	0.799998	6.38328e-124	0.808326	9.16485e-151	3476	3476
pabpc1a	V4only	ENSDARG00000017219	LL0000021195			0.508284	3.47852e-18	339	340
pak2a	both	ENSDARG00000068177	LL0000021222	0.625093	1.4495e-18	0.62454	1.59865e-23	1008	1016
palld	both	ENSDARG00000040009	LL0000021231	1.04534	2.12647e-77	1.09762	1.35864e-103	1415	1426
papss2b	both	ENSDARG00000056600	LL0000021264	0.619029	2.09122e-58	0.622492	3.57857e-51	759	759
pcolceb	both	ENSDARG00000052057	LL0000021450	1.82592	0	1.77064	0	795	804
pdcd6	both	ENSDARG00000005220	LL0000021484	1.05109	2.46721e-55	0.983934	6.37381e-54	622	622
pdlim4	V4only	ENSDARG00000068973	LL0000021547			1.07974	7.28089e-240
pdlim5a	V4only	ENSDARG00000101777	LL0000021548			0.672575	1.80495e-82	3074	3074
plscr3b	both	ENSDARG00000069432	LL0000022173	0.730917	4.18689e-36	0.764716	1.0762e-40	2228	2228
pmp22b	both	ENSDARG00000060457	LL0000022202	0.723391	8.42283e-50	0.727645	1.8932e-52	2561	2564
pno1	both	ENSDARG00000008502	LL0000022214	0.678309	1.61758e-24	0.739303	2.81923e-28
pnrc2	both	ENSDARG00000053291	LL0000022232	1.21685	6.08504e-83	1.27982	1.32291e-88	2273	2273
ppp1r1c	both	ENSDARG00000038941	LL0000022431	1.45883	0	1.65495	0	1556	433
prelp	V4only	ENSDARG00000070597	LL0000022543			0.899731	3.16202e-81	931	1660
ptgdsa	both	ENSDARG00000069439	LL0000022816	1.26798	0	1.21881	0	345	345
rarga	V4only	ENSDARG00000034117	LL0000023202			0.562686	2.07824e-19	305	1974
rgcc	both	ENSDARG00000035810	LL0000023587	0.616084	7.85699e-43	0.53019	2.30129e-32	490	490
rock2b.1	Ens95only	ENSDARG00000004877		0.637119	1.45657e-94					two separate adjacent genes in Ens95 collapsed into single locus in V4.2; single V4.2 locus is NOT in this cluster
romo1	both	ENSDARG00000038076	LL0000023858	0.712684	6.04739e-38	0.786617	8.68343e-46	596	596
rplp2	both	ENSDARG00000101406	LL0000023942	0.649282	5.46601e-79	0.736346	2.21753e-84	52	57
rrbp1b	both	ENSDARG00000041703	LL0000024028	0.649909	2.19611e-52	0.610017	7.75776e-45
rsl24d1	both	ENSDARG00000040439	LL0000024053	0.501692	5.73242e-27	0.598509	2.37377e-33	415	415
samd10a	V4only	ENSDARG00000079978	LL0000024176			1.15336	4.72653e-264	116	116
sdc4	both	ENSDARG00000059906	LL0000024337	0.915723	3.35448e-47	0.990179	3.09709e-53	1502	1513
sec61a1	both	ENSDARG00000021669	LL0000024385	0.669661	1.86429e-25	0.670503	6.33139e-24	1050	1050
sec61b	both	ENSDARG00000076568	LL0000024387	0.989165	1.23411e-55	1.07908	1.9399e-63	280	280
sec61g	both	ENSDARG00000018637	LL0000024388	0.87794	1.12117e-78	0.952017	1.1235e-81
selenow1	both	ENSDARG00000035136	LL0000024415	0.769249	4.25398e-35	0.847556	5.77753e-43	358	358
sema3bl	V4only	ENSDARG00000007560	LL0000024424			1.05975	4.793e-183	705	7738
sept8b	both	ENSDARG00000014233	LL0000024479	1.03505	7.71563e-276	1.01087	6.75603e-238	613	613
serp1	both	ENSDARG00000099439	LL0000040137	0.601037	1.47711e-21	0.610558	2.75382e-22	498	498
sesn1	both	ENSDARG00000020693	LL0000024523	1.12865	7.06751e-51	1.17069	6.18853e-53	2411	2414
si:ch211-106h11.3	V4only	ENSDARG00000027360	LL0000024898			1.28426	0	missing
si:ch211-156j16.1	V4only	ENSDARG00000092035	LL0000025190			0.526624	5.10172e-52	1125	1125
si:ch211-197g15.7	both	ENSDARG00000071355	LL0000025422	0.698281	7.52766e-231	0.660274	1.77221e-185	1399	1399
si:ch73-217n20.1	V4only	ENSDARG00000091584	LL0000026316			0.651545	3.0347e-68	missing
si:dkey-11f4.14	V4only	ENSDARG00000098461	LL0000026687			1.41835	1.7831e-77	missing
si:dkey-164f24.2	both	ENSDARG00000089418	LL0000026832	1.05667	3.95527e-66	1.08937	1.41981e-84	1605	1605
si:dkey-19b23.8	both	ENSDARG00000103211	LL0000027017	2.45028	0	2.48873	0	1548	1548
si:dkey-204f11.64	both	ENSDARG00000094695	LL0000027066	0.577826	8.84173e-25	0.607812	1.10236e-31	2794	2794
si:dkey-262k9.2	both	ENSDARG00000098024	LL0000027422	0.698362	5.63492e-42	0.739935	1.61906e-49	8397	8421
si:dkey-264d12.4	V4only	ENSDARG00000036428	LL0000027427			0.601957	9.24989e-60	141	2590
si:dkey-6n6.1	V4only	ENSDARG00000062487	LL0000027840			1.63873	0	46	547
slc35d1a	both	ENSDARG00000011973	LL0000028708	0.692367	3.87843e-76	0.748976	1.46398e-83	1324	1324
slc37a2	both	ENSDARG00000023394	LL0000028730	0.601192	1.25435e-17	0.590501	2.09981e-18	1502	1502
slc3a2b	both	ENSDARG00000037012	LL0000028761	0.563936	7.14077e-22	0.850813	1.7795e-30	missing
slc7a1	V4only	ENSDARG00000016439	LL0000028853			0.785808	1.0789e-46	50	6535
snai1a	Ens95only	ENSDARG00000056995	LL0000029034	0.559767	3.90079e-21			943	945	reason for discrepancy unknown, though overlapping transcripts exist for this locus
snorc	both	ENSDARG00000092383	LL0000029061	2.25627	0	2.14835	0	523	523
sox6	Ens95only	ENSDARG00000015536	LL0000029199	0.570996	3.61866e-31	0.479242	6.26505e-21	5263	5263	just under log2FC cutoff in V4.2
sox9a	V4only	ENSDARG00000003293	LL0000029203			1.08112	1.09384e-155	235	3496
spry2	both	ENSDARG00000078308	LL0000029324	0.51358	2.1582e-16	0.550232	1.35386e-20	863	863
stard13b	both	ENSDARG00000098954	LL0000029508	0.630568	6.29159e-51	0.625172	4.67691e-59	915	915
stau2	both	ENSDARG00000026801	LL0000029527	0.854814	1.65068e-39	0.904318	2.97753e-45	1049	1051
sult6b1	both	ENSDARG00000086826	LL0000029672	0.874007	5.03037e-35	0.966324	6.62591e-46	504	504
tbx5a	V4only	ENSDARG00000024894	LL0000030056			0.763916	4.78266e-246
tdh	both	ENSDARG00000002745	LL0000030109	0.78462	4.17563e-28	0.803728	2.39319e-31	874	874
tgfb3	V4only	ENSDARG00000019367	LL0000030227			0.805207	4.32433e-46	missing
tgm2l	both	ENSDARG00000093381	LL0000030244	1.35696	0	1.21301	0
thbs1b	both	ENSDARG00000010785	LL0000030260	0.778497	5.77149e-61	0.628358	1.39693e-51	2903	2903
timp4.3	both	ENSDARG00000100795	LL0000030335	1.77684	8.69118e-95	1.74736	2.68219e-102
tmem26b	both	ENSDARG00000014682	LL0000030603	0.744512	0	0.768452	0	228	231
tmem45a	both	ENSDARG00000070743	LL0000030621	0.731081	3.83032e-72	0.740662	1.51208e-83	831	831
tns2a	V4only	ENSDARG00000076292	LL0000030794			1.12765	8.56998e-115	580	6175
tnxba	both	ENSDARG00000001760	LL0000030799	1.7074	0	1.52127	0	393	394
trappc3	both	ENSDARG00000045364	LL0000031034	0.931262	5.72592e-62	1.08904	4.12547e-79	558	2445
trib3	both	ENSDARG00000016200	LL0000031065	0.545122	6.1987e-06	0.581995	8.62123e-09	1058	1058
tuba8l2	both	ENSDARG00000031164	LL0000031353	0.644319	4.80523e-18	0.639341	1.26524e-17	61	160
tuft1a	both	ENSDARG00000061242	LL0000031370	1.0793	5.7826e-69	1.15294	8.43177e-99	2024	2024
ucmab	both	ENSDARG00000005485	LL0000031551	2.25954	0	2.25418	0	849	849
vdac3	both	ENSDARG00000003695	LL0000031828	0.665791	2.4059e-27	0.634626	2.10149e-24	613	613
vdrb	V4only	ENSDARG00000070721	LL0000031830			0.503558	2.33327e-15	329	5848
VIT	V4only	ENSDARG00000063631	LL0000031865			1.66972	5.75038e-248	409	1397
wisp3	both	ENSDARG00000071048	LL0000032076	0.791942	0	1.75216	0	505	1973
wwp2	both	ENSDARG00000061345	LL0000032178	0.819034	1.38296e-93	0.885603	7.32941e-98	3527	3527
XLOC-043382	V4only		LL0000037921			1.57904	0
zgc:136864	both	ENSDARG00000059816	LL0000038677	0.690984	3.33575e-24	0.720683	3.03243e-25	1044	1044
zgc:153675	both	ENSDARG00000071555	LL0000038742	0.574576	8.64168e-23	0.527983	3.77135e-17
zgc:162730	both	ENSDARG00000103720	LL0000038847	0.819337	1.58743e-18	0.97314	9.35369e-26	763	763
zgc:92744	V4only	ENSDARG00000076223	LL0000040305			0.720356	1.14569e-31	664	664

## Sheet: 2 V4only pdgfrbpos data
gene	Ens95orV4	Ensdarg	LLgeneID	Ens95PdgfrbPosLgFC	Ens95Pdgfrbpadj	Ens -log10 padj	V4PdgfrbPosLgFC	V4Pdgfrbpadj	V4 -log10padj	pdgfrbpos-enriched
si:dkey-6n6.1	V4only	ENSDARG00000062487	LL0000027840	4.02063	5.2395e-20	19.2807	4.00838	8.60304e-24	23.0653	both
VIT	V4only	ENSDARG00000063631	LL0000031865	3.09276	9.88632e-09	8.00497	3.35775	7.73476e-18	17.1116	both
col8a2	V4only	ENSDARG00000060893	LL0000006028	2.37051	4.92461e-08	7.30763	2.5313	1.07996e-08	7.96659	both
fzd9b	V4only	ENSDARG00000014673	LL0000011032	2.30437	1.35162e-07	6.86914	2.33964	7.69938e-11	10.1135	both
id3	V4only	ENSDARG00000054823	LL0000012462	2.05501	1.80623e-06	5.74323	2.08865	5.24399e-07	6.28034	both
CYTL1	V4only	ENSDARG00000110744	LL0000008640	3.46497	2.90108e-06	5.53744	3.78811	3.72253e-14	13.4292	both
si:ch211-156j16.1	V4only	ENSDARG00000092035	LL0000025190	1.5774	3.19031e-06	5.49617	1.584	2.57553e-07	6.58913	both
prelp	V4only	ENSDARG00000070597	LL0000022543	2.17324	1.60309e-05	4.79504	2.15515	3.94086e-07	6.40441	both
sox9a	V4only	ENSDARG00000003293	LL0000029203	2.03555	2.1283e-05	4.67197	1.94532	2.69305e-07	6.56976	both
si:dkey-264d12.4	V4only	ENSDARG00000036428	LL0000027427	2.40112	3.66276e-05	4.43619	2.16979	1.73927e-07	6.75963	both
tgfb3	V4only	ENSDARG00000019367	LL0000030227	2.40657	3.97781e-05	4.40036	2.39381	4.13384e-09	8.38365	both
ier2a	V4only	ENSDARG00000099195	LL0000012474	2.34905	0.000458677	3.33849	2.37367	0.000446293	3.35038	both
lpar1	V4only	ENSDARG00000099840	LL0000018284	1.60329	0.000885282	3.05292	1.66052	5.82022e-06	5.23506	both
si:ch73-217n20.1	V4only	ENSDARG00000091584	LL0000026316	2.40763	0.000955862	3.0196	2.55954	2.25067e-06	5.64769	both
tns2a	V4only	ENSDARG00000076292	LL0000030794	1.81984	0.00102599	2.98886	2.74781	3.91708e-14	13.407	both
atp1b1a	V4only	ENSDARG00000013144	LL0000001584	1.24329	0.00128364	2.89156	1.2755	0.000412386	3.3847	both
rarga	V4only	ENSDARG00000034117	LL0000023202	1.34163	0.0014924	2.82612	1.36085	0.000183915	3.73538	both
zgc:92744	V4only	ENSDARG00000076223	LL0000040305	1.34062	0.00543702	2.26464	1.37404	0.00314392	2.50253	both
cyr61	V4only	ENSDARG00000023062	LL0000008623	1.98682	0.00634829	2.19734	2.00664	0.00634986	2.19724	both
map1lc3b	V4only	ENSDARG00000101127	LL0000018579	1.02665	0.00725434	2.1394	1.06152	0.0022981	2.63863	both
loxl2a	V4only	ENSDARG00000044010	LL0000018277	1.84308	0.00730826	2.13619	2.29828	3.73092e-11	10.4282	both
slc7a1	V4only	ENSDARG00000016439	LL0000028853	1.4314	0.0108585	1.96423	1.95709	2.86518e-06	5.54285	both
hbegfa	V4only	ENSDARG00000075121	LL0000011959	1.44494	0.0145967	1.83575	1.4682	0.0126215	1.89889	both
gtpbp4	V4only	ENSDARG00000018961	LL0000011855	1.14204	0.0150952	1.82116	1.1738	0.00937676	2.02795	both
eif4ebp3l	V4only	ENSDARG00000041607	LL0000009529	1.30262	0.0153016	1.81526	1.33726	0.0108348	1.96518	both
gdf10a	V4only	ENSDARG00000095378	LL0000011231	1.61983	0.0160922	1.79339	1.45612	1.90775e-05	4.71948	both
mych	V4only	ENSDARG00000077473	LL0000019810	1.12557	0.02077	1.68256	1.15416	0.0137064	1.86308	both
atp10a	V4only	ENSDARG00000061039	LL0000001566	1.12658	0.0228817	1.64051	1.45723	6.00712e-05	4.22133	both
klf15	V4only	ENSDARG00000091127	LL0000013359	1.23581	0.0241934	1.6163	1.48372	0.00181414	2.74133	both
nop53	V4only	ENSDARG00000100452	LL0000020473	1.10026	0.0254778	1.59384	1.13247	0.0165794	1.78043	both
ehd2b	V4only	ENSDARG00000040362	LL0000009467	1.03124	0.0255101	1.59329	1.06091	0.0161398	1.7921	both
eif4ebp2	V4only	ENSDARG00000031819	LL0000009527	0.894144	0.0400763	1.39711	0.932079	0.0182304	1.7392	not enriched in either
cd99	V4only	ENSDARG00000051975	LL0000005261	0.918953	0.0460936	1.33636	0.95362	0.0278221	1.55561	not enriched in either
pabpc1a	V4only	ENSDARG00000017219	LL0000021195	0.800568	0.062951	1.201	0.849036	0.0298487	1.52507	not enriched in either
capgb	V4only	ENSDARG00000099672	LL0000004873	-1.02485	0.074588	1.12733	-0.988488	0.0797095	1.09849	not enriched in either
eif3g	V4only	ENSDARG00000016889	LL0000009502	0.860982	0.0795458	1.09938	0.895125	0.0525534	1.2794	not enriched in either
ak2	V4only	ENSDARG00000005926	LL0000000523	0.795859	0.12533	0.901945	0.827472	0.0926064	1.03336	not enriched in either
vdrb	V4only	ENSDARG00000070721	LL0000031830	0.959643	0.189216	0.723042	0.893189	0.148903	0.827096	not enriched in either
actn4	V4only	ENSDARG00000099786	LL0000000231	0.542791	0.33002	0.48146	0.784842	0.0651787	1.18589	not enriched in either
pdlim4	V4only	ENSDARG00000068973	LL0000021547	0.711898	0.569903	0.244199	0.995449	0.0163247	1.78715	not enriched in either
pdlim5a	V4only	ENSDARG00000101777	LL0000021548	-0.31052	0.609602	0.214953	-0.214518	0.682058	0.166179	not enriched in either
tbx5a	V4only	ENSDARG00000024894	LL0000030056	0.502166	0.674077	0.17129	0.631495	0.307266	0.512485	not enriched in either
emilin3a	V4only	ENSDARG00000078052	LL0000009617	0.0482207	0.977702	0.00979371	0.0515394	0.972972	0.0118996	not enriched in either
samd10a	V4only	ENSDARG00000079978	LL0000024176	-0.0208246	0.993145	0.00298748	0.623767	0.382243	0.41766	not enriched in either
si:dkey-11f4.14	V4only	ENSDARG00000098461	LL0000026687	-0.743263	1	0	0.804712	0.45456	0.342409	not enriched in either
XLOC-043382	V4only		LL0000037921							not enriched in either
dars	V4only	ENSDARG00000070043	LL0000008679	1.10913	0.0147989	1.82977	0.915619	0.0132739	1.877	only in Ens95
meltf	V4only	ENSDARG00000075159	LL0000018868	1.69681	0.0607423	1.21651	2.96373	7.63675e-09	8.11709	only in V4
cspg4	V4only	ENSDARG00000078227	LL0000007452	1.18008	0.0713897	1.14636	1.85613	6.18658e-05	4.20855	only in V4
sema3bl	V4only	ENSDARG00000007560	LL0000024424	0.954544	0.235898	0.627276	1.60049	1.31504e-05	4.88106	only in V4
si:ch211-106h11.3	V4only	ENSDARG00000027360	LL0000024898	1.52213	0.343102	0.464576	3.74205	8.29666e-21	20.0811	only in V4
eps8l2	V4only	ENSDARG00000058108	LL0000009742	0.59703	0.604155	0.218852	1.06573	0.0250972	1.60037	only in V4
fam169ab	V4only	ENSDARG00000004177	LL0000010017	-0.25151	0.899313	0.0460891	2.6311	1.68413e-11	10.7736	only in V4
LOC100330861	V4only		LL0000014092				5.43189	5.49388e-22	21.2601	only in V4
cpn1	V4only	ENSDARG00000096728	LL0000006151				2.63001	2.28934e-14	13.6403	only in V4
LOC566587	V4only		LL0000018161				2.45264	8.88726e-07	6.05123	only in V4
CU929237.1	V4only	ENSDARG00000081800	LL0000008373				1.63684	0.000822195	3.08503	only in V4
