# Supplementary material for: An improved zebrafish transcriptome annotation for sensitive and comprehensive detection of cell type-specific genes
Source: eLife. 2020 Aug 24;9:e55792. doi: 10.7554/eLife.55792 (PMC7486121; doi:10.7554/eLife.55792)
Supplement: Figure 5—source data 2. — Worksheet one includes all epidermis genes identified using both Ens95 and V4.2 quantification, as indicated, with associated adjusted p-values and log2 fold change. 3' UTR length from matching reference gene (from Figure 2—source data 2) is indicated. Worksheet two includes matched bulk RNA-seq quantification from Ens95 and V4.3 annotations for epidermis-specific genes. Data used to generate Figure 5A–C, Figure 5—figure supplement 1A,B. [file elife-55792-fig5-data2.xlsx]

## Sheet: title
	Figure 5 - source data 2
	Epidermis-specific genes identified by scRNA-seq
	worksheet 1 - epidermis-specific genes identified by indicated annotation, includes log2 fold change and 3' UTR length for matched reference gene
	worksheet 2 - matching pdgfrbpos bulk RNA-seq data for epidermis-specific genes

## Sheet: 1 epiderm gene with ref
gene	V4orEns95	LLgeneID	Ensdarg	avg_logFC	p_val_adj	avg_logFC Ens95	p_val_adj Ens95	V4.2 3pUTR length	Ens95 3pUTR length	Note
actb2	both	LL0000000220	ENSDARG00000037870	0.618438	2.64752e-31	0.526756	2.75978e-21
adgrg6	V4only	LL0000000363	ENSDARG00000054137	0.608461	2.04062e-73
akap12b	both	LL0000000536	ENSDARG00000055678	0.893222	7.35039e-66	0.843036	5.60162e-56
and1	both	LL0000000972	ENSDARG00000088514	3.26533	0	3.10141	0	2623	2623
and2	both	LL0000000973	ENSDARG00000079302	4.41252	0	4.28872	0	737	737
angptl7	both	LL0000000990	ENSDARG00000027582	0.586326	7.89564e-55	0.595043	4.96252e-47	407	407
antxr1c	both	LL0000001092	ENSDARG00000063612	0.807359	1.31474e-142	0.740744	2.78572e-108	4722	4570
antxr2a	V4only	LL0000001094	ENSDARG00000104118	0.658938	2.69889e-59			3184	3184
aqp3a	both	LL0000001214	ENSDARG00000003808	2.24295	1.12101e-200	2.18316	4.45358e-151	844	844
arl4ca	V4only	LL0000001361	ENSDARG00000057606	0.537105	2.23858e-50
bambia	both	LL0000001788	ENSDARG00000055381	0.750418	4.2296e-70	0.841191	9.79046e-72	446	446
bhmt	both	LL0000001893	ENSDARG00000013430	1.51356	6.2972e-106	1.53168	7.17445e-95	224	224
bmp1a	both	LL0000001943	ENSDARG00000028071	0.6918	4.943e-86	0.568902	1.38931e-80	5599	803
bmp2a	both	LL0000001945	ENSDARG00000013409	0.538063	8.22838e-127	0.583608	8.1009e-110
BX571880.1	Ens95only	LL0000003212	ENSDARG00000097533			0.870916	3.51249e-44		no	detected as enriched in one other cluster; possible novel subcluster split in V4.2
c1qtnf5	both	LL0000003902	ENSDARG00000056134	2.09787	0	2.13642	0	231	231
CABZ01074130.1	both	LL0000004419	ENSDARG00000105274	4.41082	0	4.36727	0	779	779
CABZ01085139.1	Ens95only	LL0000004570	ENSDARG00000102687			0.537001	6.33233e-71	1427	273	reason for discrepancy not known, although Ens95 annnotation comprises only last exon, with much longer 3' UTR annotation in V4.2
CABZ01092746.1	both	LL0000004643	ENSDARG00000117319	1.78683	2.84677e-149	1.67853	8.23255e-112		no
capn12	V4only	LL0000004875	ENSDARG00000010758	0.692968	2.73623e-195			5013	477
cbr1l	both	LL0000004990	ENSDARG00000021149	0.984932	2.66926e-108	0.920129	1.20221e-92	390	390
cd82a	both	LL0000005256	ENSDARG00000019098	0.626924	1.66622e-54	0.575792	7.76144e-43	3247	3247
cd82b	both	LL0000005257	ENSDARG00000026070	0.971175	2.86763e-125	0.824693	1.68493e-83	2111	2111
cdo1	both	LL0000005391	ENSDARG00000099389	0.813248	2.01244e-52	0.833676	2.22283e-54	654	654
col12a1b	V4only	LL0000005982	ENSDARG00000019601	0.605394	9.7169e-47				no
col1a1a	both	LL0000005994	ENSDARG00000012405	3.36466	5.78299e-211	3.1291	1.39394e-167	1394	1326
colgalt2	V4only	LL0000006038	ENSDARG00000014670	1.2571	0				no
crabp2a	both	LL0000007265	ENSDARG00000073978	1.37463	4.491e-245	1.42919	2.3855e-213	1819	1819
ctsk	both	LL0000007761	ENSDARG00000040251	0.887939	2.68642e-94	0.871852	4.20678e-79	742	742
cyr61	both	LL0000008623	ENSDARG00000023062	0.744797	5.63438e-27	0.698015	1.41298e-21	3885	3885
dcn	both	LL0000008724	ENSDARG00000012066	0.769781	3.25436e-58	0.572957	4.46727e-37	1533	1164
ddt	both	LL0000008767	ENSDARG00000044751	0.646673	1.04285e-27	0.650289	2.88106e-25	599	599
dnase1l4.1	both	LL0000009098	ENSDARG00000015123	0.548255	6.66697e-40	0.540007	6.95448e-30	124	124
ecrg4a	both	LL0000009365	ENSDARG00000056087	2.44318	2.92032e-228	2.2411	5.50758e-164	467	467
f3b	both	LL0000009918	ENSDARG00000005673	0.620429	4.97934e-15	0.558474	6.63482e-12
fah	V4only	LL0000009948	ENSDARG00000101762	1.55106	3.17067e-134			7	7
fam169ab	V4only	LL0000010017	ENSDARG00000004177	0.541967	7.75361e-58				no
fbln1	V4only	LL0000010165	ENSDARG00000103311	1.70221	0				no
fbp1a	both	LL0000010173	ENSDARG00000021366	0.650248	1.27456e-30	0.541943	5.40074e-19	416	416
fkbp14	both	LL0000010371	ENSDARG00000040695	0.626897	9.5605e-56	0.518609	2.13076e-33	3395	1005
fkbp7	both	LL0000010381	ENSDARG00000010962	0.713572	9.73656e-92	0.704863	2.35006e-76
fmoda	both	LL0000010422	ENSDARG00000044895	0.814279	6.85777e-96	0.745132	6.2952e-83	796	796
fthl27	both	LL0000010905	ENSDARG00000031776	0.902742	1.49905e-48	0.89972	2.07578e-52	220	220
gch1	both	LL0000011210	ENSDARG00000070453	1.30885	8.35604e-292	1.43324	0
ghrb	both	LL0000011304	ENSDARG00000007671	0.648417	6.05991e-35	0.665068	6.51081e-31	1886	1886
glud1a	both	LL0000011409	ENSDARG00000008816	0.743222	1.10669e-46	0.773422	8.96258e-46	736	735
glud1b	both	LL0000011410	ENSDARG00000101074	1.25689	8.0625e-63	1.32124	2.45157e-60	814	814
got2b	both	LL0000011527	ENSDARG00000005840	0.659978	2.18068e-23	0.709473	5.80083e-23	299	299
gpc1a	V4only	LL0000011547	ENSDARG00000019341	0.907488	9.53472e-222			4216	13
gstp1	both	LL0000011818	ENSDARG00000104068	0.808152	1.08899e-42	0.775928	7.19989e-36	212	212
gstz1	both	LL0000011824	ENSDARG00000027984	1.44334	1.08891e-108	1.37728	8.06159e-88	762	762
hdlbpa	both	LL0000012006	ENSDARG00000009830	0.738021	1.30262e-22	0.632418	3.89508e-15	1117	1117
her6	both	LL0000012054	ENSDARG00000006514	0.611771	3.52973e-31	0.583996	1.39775e-23
hgd	both	LL0000012078	ENSDARG00000058005	2.18577	4.24281e-188	2.13907	2.3874e-155	4219	4219
hoxa13a	both	LL0000012243	ENSDARG00000100312	0.752546	0	0.806967	0	634	634
hoxa13b	both	LL0000012244	ENSDARG00000036254	1.02346	0	1.0832	0	627	627
hpdb	both	LL0000012295	ENSDARG00000044935	3.06563	1.89144e-258	2.98807	3.82162e-200	397	396
im:7150988	both	LL0000012716	ENSDARG00000109310	2.20108	0	2.12267	1.6064e-257	160	4326
itgb1b.2	both	LL0000012940	ENSDARG00000022689	0.966979	9.24757e-122	1.00274	1.93892e-117	405	405
kazald3	both	LL0000013078	ENSDARG00000053509	0.652236	2.62647e-150	0.566803	2.94068e-118	450	450
klf15	V4only	LL0000013359	ENSDARG00000091127	1.05129	1.7921e-60			3781	744
ldhba	both	LL0000013580	ENSDARG00000019644	1.14973	9.36115e-47	1.19545	1.11868e-47	803	803
lgals3b	V4only	LL0000013618	ENSDARG00000044001	0.518806	5.28335e-27	0.484627	7.12828e-19	921	921
LOC100535130	V4only	LL0000014260		2.43467	0
loxl2b	both	LL0000018278	ENSDARG00000044074	0.85424	7.88391e-53	0.790491	1.29326e-38	3856	3856
lrrc17	both	LL0000018351	ENSDARG00000037960	0.783066	1.48322e-76	0.744356	1.21043e-61	1575	1575
lrrc58a	V4only	LL0000018383	ENSDARG00000076773	0.729403	3.16484e-55				no
lxn	both	LL0000018460	ENSDARG00000043102	1.03637	4.1579e-61	0.957517	2.13648e-43	1565	1565
mdh1aa	both	LL0000018801	ENSDARG00000017772	1.56804	2.3574e-57	1.68902	1.78102e-56	311	311
mdh2	Ens95only	LL0000018804	ENSDARG00000043371	0.45968	1.75663e-06	0.544247	5.54129e-06	2766	2766	just under log2 fold change cutoff
mmp11a	V4only	LL0000019394	ENSDARG00000026325	0.899427	0				no
mmp14a	both	LL0000019398	ENSDARG00000002235	0.548472	5.64119e-46	0.548128	4.86606e-39	1444	1437
mmp2	both	LL0000019407	ENSDARG00000017676	0.861644	1.3318e-70	0.770491	7.00801e-55	847	847
msx1b	both	LL0000019664	ENSDARG00000008886	0.965253	1.90233e-125	1.02065	6.98083e-113	561	561
msx2b	both	LL0000019666	ENSDARG00000101023	1.20876	0	1.28788	0	794	539
msx3	both	LL0000019667	ENSDARG00000015674	0.672833	1.41543e-93	0.708725	1.44919e-87	1095	1095
mxra5b	V4only	LL0000019786	ENSDARG00000076309	0.750108	1.13169e-226				no
mxra8a	both	LL0000019788	ENSDARG00000062222	1.17762	1.45271e-291	1.15954	2.04707e-221	2116	2116
mxra8b	both	LL0000019789	ENSDARG00000062129	0.941386	6.12979e-98	0.862693	2.17696e-73	1079	973
nck1a	both	LL0000020059	ENSDARG00000074262	0.621342	2.58581e-64	0.633588	5.41021e-61	738	738
nfe2l2a	both	LL0000020251	ENSDARG00000042824	0.554838	2.86187e-24	0.587097	2.08668e-23	2822	2822
notum1b	both	LL0000020491	ENSDARG00000117145	1.18067	2.39615e-256	1.13349	9.65482e-220	1984	1978
ntd5	both	LL0000020680	ENSDARG00000040944	1.32278	1.32243e-57	1.21549	7.67571e-42	672	672
ogna	both	LL0000020833	ENSDARG00000044132	1.30836	2.60863e-51	1.26013	5.49101e-41	544	544
pah	both	LL0000021216	ENSDARG00000020143	2.40377	0	2.41365	0	763	763
pcbd1	both	LL0000021349	ENSDARG00000031981	2.12387	2.42461e-232	2.10571	1.66457e-205	366	366
pck1	both	LL0000021429	ENSDARG00000013522	0.896308	7.15378e-45	0.992784	9.84683e-45	590	590
pcolcea	Ens95only	LL0000021449	ENSDARG00000056913			0.522823	2.66533e-34	425	425
pfkfb4b	V4only	LL0000021636	ENSDARG00000029075	0.506119	2.98871e-09	0.494061	3.39374e-07	1171	1171
plpp3	both	LL0000022153	ENSDARG00000059933	0.670736	5.31282e-40	0.583844	1.58705e-28	2868	2868
ppib	both	LL0000022374	ENSDARG00000092798	0.964683	8.50671e-53	0.921358	4.49366e-46	239	239
prdx1	both	LL0000022532	ENSDARG00000058734	0.625298	1.2991e-61	0.661108	3.98867e-60	2557	2557
prdx5	both	LL0000022536	ENSDARG00000055064	0.746035	5.80272e-40	0.73157	4.09243e-32	294	294
prrx1a	both	LL0000022700	ENSDARG00000033971	1.1238	1.59424e-163	1.15978	3.03404e-148	739	739
prrx1b	both	LL0000022701	ENSDARG00000042027	0.688083	8.33869e-125	0.727973	3.54075e-118	1662	1662
ptgdsb.1	both	LL0000022817	ENSDARG00000027088	0.987597	1.37273e-46	0.902719	1.93393e-35	411	411
ptx3a	V4only	LL0000022926	ENSDARG00000068275	1.74781	0			1472	715
qdpra	both	LL0000022986	ENSDARG00000040190	2.08814	1.51718e-204	2.1662	1.77813e-193	3881	3881
robo3	V4only	LL0000023849	ENSDARG00000005645	0.563402	1.85067e-69			2401	2401
rpl22l1	V4only	LL0000023909	ENSDARG00000010244	0.528807	6.24346e-25	0.481626	1.47949e-22
sat1a.2	Ens95only	LL0000024217	ENSDARG00000095908	0.472334	6.38853e-09	0.528505	8.56458e-10	739	739	just under log2 fold change cutoff
sec61b	both	LL0000024387	ENSDARG00000076568	0.654227	9.52603e-24	0.654057	3.05984e-23	280	280
sec61g	V4only	LL0000024388	ENSDARG00000018637	0.508177	2.61266e-27	0.423458	1.27812e-17
selenof	Ens95only	LL0000024397	ENSDARG00000099664	0.489535	9.27556e-11	0.502006	2.3353e-10	448	448	just under log2 fold change cutoff
selenop	Ens95only	LL0000024463	ENSDARG00000093549			0.917801	2.80834e-36
sept9a	both	LL0000024480	ENSDARG00000020235	0.611138	4.61352e-41	0.610776	4.80871e-35	4131	4131
serpine2	both	LL0000024510	ENSDARG00000029353	1.18433	5.9851e-88	1.0161	2.92469e-63	381	267
sh3kbp1	V4only	LL0000024647	ENSDARG00000075853	0.525137	5.44659e-50			639	338
si:ch1073-291c23.2	V4only	LL0000024815	ENSDARG00000074869	0.556408	5.42448e-46	0.441146	1.27222e-29	909	665
si:ch211-14k19.8	both	LL0000025143	ENSDARG00000088975	1.33321	0	1.29981	0	86	86
si:ch211-76l23.4	both	LL0000026136	ENSDARG00000096242	2.01652	5.84096e-216	1.95179	1.28547e-145	2342	2342
si:ch73-86n18.1	both	LL0000026585	ENSDARG00000056379	0.972378	2.67621e-112	1.03301	1.56688e-114	82	82
si:dkey-11f4.14	V4only	LL0000026687	ENSDARG00000098461	0.688024	2.40311e-20				no
si:dkey-12l12.1	both	LL0000026730	ENSDARG00000094422	1.52097	1.37319e-103	1.42498	1.97051e-73	992	943
si:dkey-164f24.2	both	LL0000026832	ENSDARG00000089418	0.727822	9.18379e-42	0.769273	2.1894e-38	1605	1605
slc16a10	both	LL0000028502	ENSDARG00000020984	1.72925	3.46084e-199	1.70953	7.89412e-167
sparc	both	LL0000029233	ENSDARG00000019353	0.945124	3.08386e-48	0.792499	1.15528e-35	1678	1678
sult6b1	both	LL0000029672	ENSDARG00000086826	0.796901	4.7415e-41	0.794339	4.31156e-37	504	504
sypl1	V4only	LL0000029771	ENSDARG00000077356	0.856562	4.07555e-138			2969	251
tat	both	LL0000029981	ENSDARG00000069630	2.58305	1.14358e-241	2.59725	1.58036e-206	516	516
tgfbi	both	LL0000030228	ENSDARG00000071586	1.50885	9.78922e-34	1.33487	4.7002e-19	972	972
tgm2b	Ens95only	LL0000030243	ENSDARG00000074094	0.480876	5.18069e-47	0.50952	1.68707e-38	1062	1062	just under log2 fold change cutoff
thbs3b	V4only	LL0000030264	ENSDARG00000012060	0.868688	1.55336e-218				no
thbs4b	both	LL0000030266	ENSDARG00000020072	0.956029	1.6047e-46	0.936738	4.19351e-39	399	399
timp2a	both	LL0000030331	ENSDARG00000061226	0.911365	2.99517e-70	0.816289	8.61319e-49	2190	2190
timp4.3	both	LL0000030335	ENSDARG00000100795	1.09218	1.89186e-66	0.967623	2.76333e-42
tmem119b	both	LL0000030458	ENSDARG00000068036	0.670276	6.36002e-119	0.665896	3.78896e-96	212	212
tspan18b	both	LL0000031244	ENSDARG00000015015	0.78727	2.01094e-89	0.864021	3.34301e-81	779	778
ttc36	both	LL0000031302	ENSDARG00000011693	1.85057	1.26565e-240	1.88594	3.55785e-220	106	106
twist1a	both	LL0000031388	ENSDARG00000030402	0.675671	3.02342e-42	0.714536	3.02106e-37	519	519
twist3	both	LL0000031391	ENSDARG00000019646	0.859627	5.85599e-119	0.896071	1.41724e-131	1026	1026
txn	V4only	LL0000040262	ENSDARG00000044125	1.04556	1.32697e-44
txn	Ens95only	LL0000040303	ENSDARG00000031435			1.04593	5.59636e-45	237	237	detected as enriched in several other clusters; possible novel subcluster split in V4.2
ucp1	both	LL0000031553	ENSDARG00000023151	3.04819	1.74464e-232	3.17926	4.64926e-207	1477	1477
ucp2	both	LL0000031554	ENSDARG00000043154	2.20983	2.89334e-108	2.19724	4.98975e-95	190	190
vcanb	Ens95only	LL0000031820	ENSDARG00000009401			1.65157	1.78139e-191	1758	1758	reason for discrepancy not known; though identical sequence exists on chrUn_KN150172v1:5650-11138 corresponds to RefSeq LOC103909969; shows as pdgfrbpos-enriched when using V4.2 and Ens95
vstm4a	both	LL0000031925	ENSDARG00000010154	0.583491	7.81495e-72	0.586925	2.53066e-61
XLOC-023492	V4only	LL0000035201		0.917801	7.47465e-47
XLOC-031096	V4only	LL0000036174		0.707464	1.25233e-247
XLOC-043382	V4only	LL0000037921		0.897722	1.07296e-113
zgc:153675	both	LL0000038742	ENSDARG00000071555	0.581957	3.9496e-47	0.625646	2.8542e-42
zgc:174904	both	LL0000039063	ENSDARG00000059049	0.643536	1.81403e-56	0.695025	5.66588e-60	884	884
zgc:66479	both	LL0000039217	ENSDARG00000008732	0.893663	1.92726e-145	0.918768	1.2365e-128	347	347
zic2a	both	LL0000039303	ENSDARG00000015554	0.847271	2.50095e-119	0.805389	1.17978e-109	1430	1430

## Sheet: 2 V4 only pdgfrbpos data
gene	V4orEns95	LLgeneID	Ensdarg	Ens95PdgfrbPosLgFC	Ens95 -log10 padj	Ens95PdgfrbPospadj	V4PdgfrbLgFC	V4 -log10 padj	V4Pdgfrbadj	pdgfrbpos enriched
XLOC-023492	V4only	LL0000035201					3.06119	13.5242	2.99101e-14	V4only
mxra5b	V4only	LL0000019786	ENSDARG00000076309	1.65693	2.52168	0.00300826	2.94186	14.5059	3.11993e-15	both
thbs3b	V4only	LL0000030264	ENSDARG00000012060	2.52928	4.68323	2.07383e-05	2.919	7.44944	3.55272e-08	both
colgalt2	V4only	LL0000006038	ENSDARG00000014670	1.40182	0.713488	0.193425	2.76138	11.7494	1.78055e-12	V4only
lrrc58a	V4only	LL0000018383	ENSDARG00000076773	0.347255	0.0525398	0.886054	2.70858	6.47729	3.33206e-07	V4only
fam169ab	V4only	LL0000010017	ENSDARG00000004177	-0.25151	0.0460891	0.899313	2.6311	10.7736	1.68413e-11	V4only
fbln1	V4only	LL0000010165	ENSDARG00000103311	1.20048	0.685317	0.206387	2.49512	9.75259	1.76772e-10	V4only
si:ch1073-291c23.2	V4only	LL0000024815	ENSDARG00000074869	2.39233	7.85682	1.39054e-08	2.43669	8.75374	1.76305e-09	both
sypl1	V4only	LL0000029771	ENSDARG00000077356	1.1086	0.744915	0.179922	2.38548	11.1703	6.7562e-12	V4only
ptx3a	V4only	LL0000022926	ENSDARG00000068275	2.14076	2.89416	0.00127597	2.35194	4.54162	2.87331e-05	both
capn12	V4only	LL0000004875	ENSDARG00000010758	2.18723	4.74993	1.77856e-05	2.31075	9.03202	9.28928e-10	both
LOC100535130	V4only	LL0000014260					2.13606	4.02287	9.4871e-05	V4only
antxr2a	V4only	LL0000001094	ENSDARG00000104118	2.2582	6.98267	1.04072e-07	2.11118	6.67333	2.12163e-07	both
fah	V4only	LL0000009948	ENSDARG00000101762	2.18901	3.95251	0.000111554	2.03803	4.42237	3.78121e-05	both
adgrg6	V4only	LL0000000363	ENSDARG00000054137	1.74705	3.83472	0.000146313	1.90878	5.56282	2.73639e-06	both
sh3kbp1	V4only	LL0000024647	ENSDARG00000075853	1.61961	4.20477	6.24062e-05	1.63646	4.87028	1.3481e-05	both
klf15	V4only	LL0000013359	ENSDARG00000091127	1.23581	1.6163	0.0241934	1.48372	2.74133	0.00181414	both
mmp11a	V4only	LL0000019394	ENSDARG00000026325	1.38032	0.669008	0.214285	1.44872	2.01423	0.00967756	V4only
sec61g	V4only	LL0000024388	ENSDARG00000018637	1.2947	1.51251	0.0307245	1.32637	1.61324	0.0243646	both
arl4ca	V4only	LL0000001361	ENSDARG00000057606	1.29531	1.88646	0.0129878	1.26837	2.67585	0.00210934	both
col12a1b	V4only	LL0000005982	ENSDARG00000019601	0.838667	0.899323	0.126089	0.881014	1.11116	0.0774183	no enriched in either
si:dkey-11f4.14	V4only	LL0000026687	ENSDARG00000098461	-0.743263	0	1	0.804712	0.342409	0.45456	no enriched in either
rpl22l1	V4only	LL0000023909	ENSDARG00000010244	0.667615	0.552823	0.280012	0.70059	0.631039	0.233863	no enriched in either
robo3	V4only	LL0000023849	ENSDARG00000005645	0.586972	0.585805	0.259535	0.610061	0.693389	0.202587	no enriched in either
txn	V4only	LL0000040262	ENSDARG00000044125	0.404016	0.241372	0.573625	0.44265	0.294344	0.507757	no enriched in either
lgals3b	V4only	LL0000013618	ENSDARG00000044001	0.359829	0.202984	0.626637	0.392552	0.246883	0.566392	no enriched in either
pfkfb4b	V4only	LL0000021636	ENSDARG00000029075	0.300117	0.176693	0.665744	0.341491	0.236666	0.579874	no enriched in either
gpc1a	V4only	LL0000011547	ENSDARG00000019341	0.127035	0.05519	0.880663	0.187558	0.123723	0.752102	no enriched in either
XLOC-031096	V4only	LL0000036174								no enriched in either
XLOC-043382	V4only	LL0000037921								no enriched in either
