# Supplementary material for: An improved zebrafish transcriptome annotation for sensitive and comprehensive detection of cell type-specific genes
Source: eLife. 2020 Aug 24;9:e55792. doi: 10.7554/eLife.55792 (PMC7486121; doi:10.7554/eLife.55792)
Supplement: Figure 6—source data 1. — First column is gene symbol, second column is assigned class shown in the Venn diagram. [file elife-55792-fig6-data1.xlsx]

## Sheet: Sheet1
gene abbrev.	source
pcna	common
rpl22l1	common
sb:cb81	common
cxcr4b	common
myb	common
eif3ba	common
nutf2l	erythroid2v4andLeukocyteENS
hbae1.1	erythroid2v4andLeukocyteENS
hbae1.3	erythroid2v4andLeukocyteENS
prdx3	erythroid2v4andLeukocyteENS
prdx2	erythroid2v4andLeukocyteENS
cpox	erythroid2v4andLeukocyteENS
blvrb	erythroid2v4andLeukocyteENS
tmem14ca	erythroid2v4andLeukocyteENS
hbbe1.1	erythroid2v4andLeukocyteENS
znfl2a	erythroid2v4andLeukocyteENS
slc20a1a	erythroid2V4
fam210b	erythroid2V4
hmbsa	erythroid2V4
tuba8l4	erythroid2V4
sptb	erythroid2V4
tubb1	erythroid2V4
urod	erythroid2V4
hbbe2	erythroid2V4
shmt2	erythroid2V4
cahz	erythroid2V4
rhag	erythroid2V4
ucp3	erythroid2V4
hmbsb	erythroid2V4
alad	erythroid2V4
hdr	erythroid2V4
mibp	erythroid2V4
lmo2	erythroid2V4
dmtn	erythroid2V4
slc25a37	erythroid2V4
klf1	erythroid2V4
ap2m1a	erythroid2V4
epb41b	erythroid2V4
add2	erythroid2V4
TCIM-1-of-many	erythroid2V4
hemgn	erythroid2V4
si:ch211-250g4.3	erythroid2V4
hbae5	erythroid2V4
glrx5	erythroid2V4
itga4	erythroid2V4
hbae3	erythroid2V4
gpx1a	erythroid2V4
si:dkey-261j4.4	erythroid2V4
tspo	erythroid2V4
tal1	erythroid2V4
si:dkey-93h22.7	erythroid2V4
gstm.1	erythroid2V4
si:ch211-103n10.5	erythroid2V4
blf	erythroid2V4
tmod4	erythroid2V4
si:ch73-299h12.2	erythroid2V4
si:ch211-207c6.2	erythroid2V4
suv39h1b	erythroid2V4
tfr1a	erythroid2V4
uros	erythroid2V4
zgc:163057	erythroid2V4
anp32b	erythroid2V4
XLOC-019068	erythroid2V4
nt5c2l1	erythroid2V4
rhd	erythroid2V4
slc4a1a	erythroid2V4
slc11a2	erythroid2V4
zgc:56095	erythroid2V4
snx5	erythroid2V4
h2afva	erythroid2V4
nmt1b	erythroid2V4
alas2	erythroid2V4
rgcc	erythroid2V4
fth1a	erythroid2V4
zgc:110540	erythroid2V4
cebpb	leukocyteBoth
nr4a1	leukocyteBoth
arpc5a	leukocyteBoth
nop58	leukocyteBoth
grap2b	leukocyteBoth
eif4a1a	leukocyteBoth
coro1a	leukocyteBoth
sept9b	leukocyteBoth
si:ch211-222l21.1	leukocyteBoth
actb1	leukocyteBoth
si:ch211-119e14.1	leukocyteBoth
ppifb	leukocyteBoth
srgn	leukocyteBoth
si:dkey-27i16.2	leukocyteBoth
mob1a	leukocyteBoth
zgc:162944	leukocyteBoth
wasb	leukocyteBoth
ikzf1	leukocyteBoth
ptpn6	leukocyteBoth
arl5c	leukocyteBoth
rgs13	leukocyteBoth
CR753876.1	leukocyteBoth
si:ch211-214p16.1	leukocyteBoth
sept6	leukocyteBoth
rac2	leukocyteBoth
fam49ba	leukocyteBoth
rps20	leukocyteBoth
laptm5	leukocyteBoth
uck2a	leukocyteBoth
dub	leukocyteBoth
h2afx	leukocyteBoth
id3	leukocyteBoth
cotl1	leukocyteBoth
parvg	leukocyteBoth
grap2a	leukocyteBoth
runx3	leukocyteBoth
hmha1b	leukocyteBoth
si:ch211-161c3.6	leukocyteBoth
b3gnt5a	leukocyteBoth
BX248082.1	leukocyteBoth
sat1a.2	leukocyteBoth
ascc1	leukocyteBoth
sept2	leukocyteBoth
si:ch211-226m16.2	leukocyteBoth
CR936442.1	leukocyteBoth
abracl	leukocyteBoth
ponzr1	leukocyteBoth
clic1	leukocyteBoth
arpc3	leukocyteBoth
arpc1b	leukocyteBoth
tsc22d3	leukocyteBoth
sla2	leukocyteBoth
rap1b	leukocyteBoth
lpar5a	leukocyteBoth
arhgdig	leukocyteBoth
glrx	leukocyteBoth
ccr9a	leukocyteBoth
arhgdia	leukocyteBoth
si:ch211-102c2.4	leukocyteBoth
pde4ba	leukocyteBoth
arpc4	leukocyteBoth
syk	leukocyteBoth
capgb	leukocyteBoth
si:dkey-262k9.4	leukocyteBoth
rps17	leukocyteBoth
bcl2l10	leukocyteBoth
pfn1	leukocyteBoth
tmsb4x	leukocyteBoth
spint1a	leukocyteBoth
arpc2	leukocyteBoth
zgc:64051	leukocyteBoth
tagapb	leukocyteBoth
wasa	leukocyteBoth
msna	leukocyteBoth
cfl1	leukocyteBoth
elf1	leukocyteBoth
eif5a2	leukocyteBoth
TXN	leukocyteENS
CR318588.4	leukocyteENS
hbae1.1.1	leukocyteENS
si:cabz01074946.1	leukocyteENS
lcp1	leukocyteENS
dut	leukocyteENS
hbbe1.2	leukocyteENS
si:ch211-105j21.9	leukocyteV4
cap1	leukocyteV4
mob3a	leukocyteV4
ppp1r18	leukocyteV4
zgc:195282	leukocyteV4
vsir	leukocyteV4
myl12.1	leukocyteV4
XLOC-000431	leukocyteV4
rplp1	leukocyteV4
XLOC-005448	leukocyteV4
tln1	leukocyteV4
ccr9b	leukocyteV4
zgc:153867	leukocyteV4
plk3	leukocyteV4
ccnd2a	leukocyteV4
XLOC-010899	leukocyteV4
capza1a	leukocyteV4
ptprc	leukocyteV4
LOC103910871	leukocyteV4
nme2b.1	leukocyteV4
XLOC-043043	leukocyteV4
pycard	leukocyteV4
rps12	leukocyteV4
nap1l1	leukocyteV4
rhogb	leukocyteV4
arf6b	leukocyteV4
vaspa	leukocyteV4
sept12	leukocyteV4
gpr183a	leukocyteV4
BX005183.3	leukocyteV4
rgs18	leukocyteV4
XLOC-012502	leukocyteV4
ets1	leukocyteV4
XLOC-013964	leukocyteV4
hmgn2	leukocyteV4
XLOC-041870	leukocyteV4
si:dkey-112e7.2	leukocyteV4
cdc42l	leukocyteV4
kdm6bb	leukocyteV4
LOC100536213	leukocyteV4
itm2bb	leukocyteV4
XLOC-042595	leukocyteV4
itgae.2	leukocyteV4
litaf	leukocyteV4
actb2	leukocyteV4
cytip	leukocyteV4
tagapa	leukocyteV4
wu:fb55g09	leukocyteV4
rplp2l	leukocyteV4
lcp2a	leukocyteV4
tiparp	leukocyteV4
tox2	leukocyteV4
lasp1	leukocyteV4
lbh	leukocyteV4
zgc:56493	leukocyteV4
dtnbp1a	leukocyteV4
CU914776.1	leukocyteV4
dusp2	leukocyteV4
sik1	leukocyteV4
hsp90ab1	leukocyteV4
LOC103909115	leukocyteV4
CU499330.1	leukocyteV4
tnfaip8l2a	leukocyteV4
limd2	leukocyteV4
odc1	leukocyteV4
